# Supplementary material for: Multi-Omic Profiling of Melophlus Sponges Reveals Diverse Metabolomic and Microbiome Architectures that Are Non-overlapping with Ecological Neighbors
Source: PubMed Central journal article supplement (PMC7074536; doi:10.3390/md18020124), 2020-02-19
Supplement: marinedrugs-18-00124-s001.pdf [file marinedrugs-18-00124-s001.pdf]

**SUPPLEMENTARY INFORMATION FOR:**

**Multi-omic profiling of *Melophlus* sponges reveals diverse metabolomic and microbiome architectures that are non-overlapping with ecological neighbors**

Ipsita Mohanty, Sheila Podell, Jason S. Biggs, Neha Garg, Eric E. Allen, Vinayak Agarwal

## SUPPLEMENTARY FIGURES

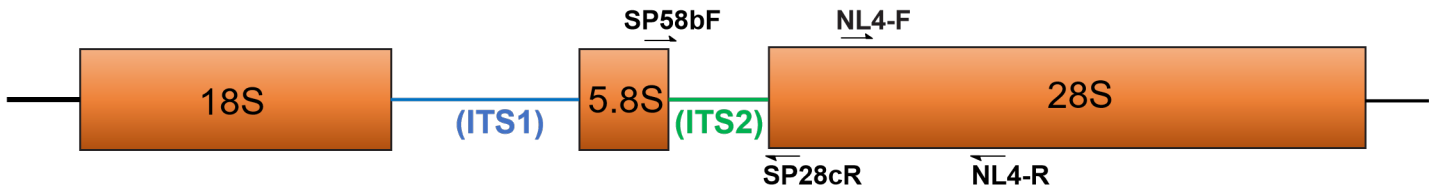

**Fig. S1: Molecular determination of sponge phylogeny.** The hypervariable internal transcribed spacer region (ITS-2) and the D3-D5 region of the large subunit (28S) of the ribosomal gene were used as the barcode for the sponge phylogeny determination. The forward primer SP58bF (5'-AATCATCGAGTCTTTGAACG-3') and reverse primer SP28cR (5'-CTTTTCACCTTTCCTCA-3') pair was used to amplify the ITS-2 region. The NL4\_F (5'-GACCCGAAAGATGGTGA ACTA-3') and NL4\_R (5'-ACCTTGGAGACCTGATGCG-3') primer pair was selected for amplifying the D3-D5 region on the 28S ribosomal RNA gene.

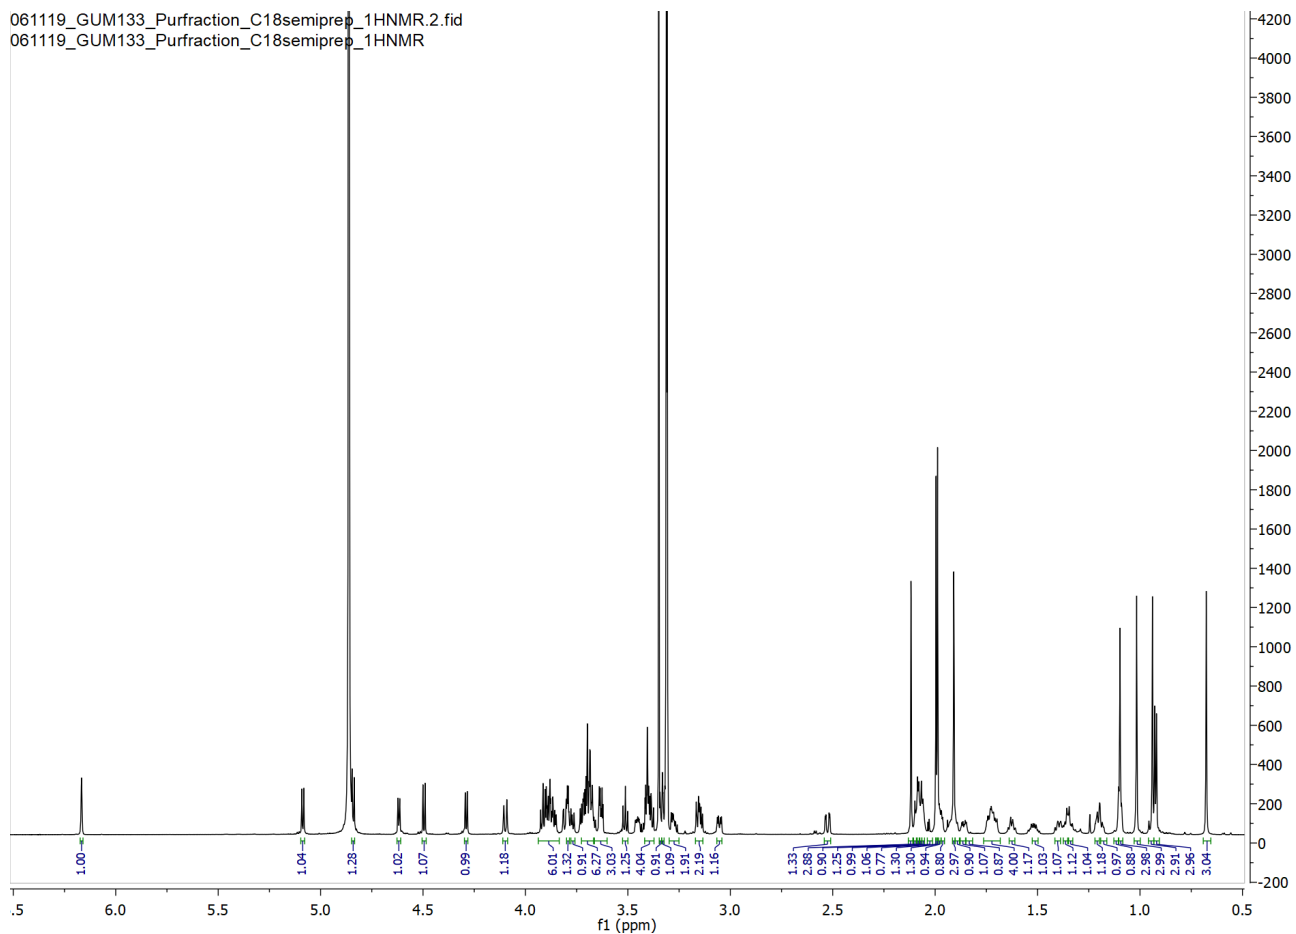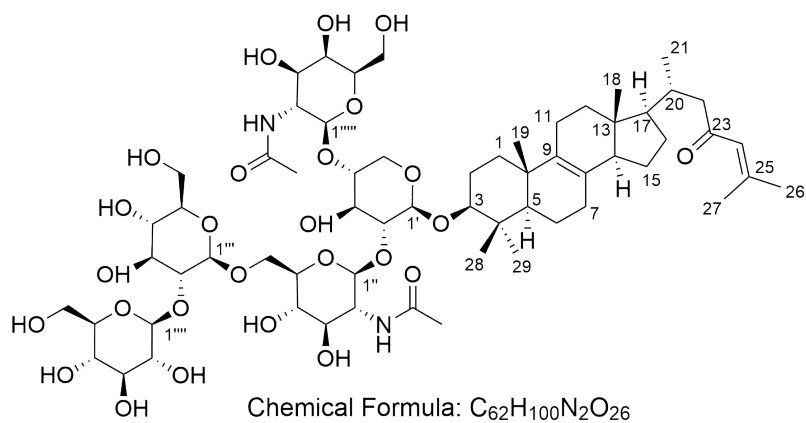

**Fig S2:**  $^1\text{H}$ -NMR spectra for **1** in  $\text{CD}_3\text{OD}$ .

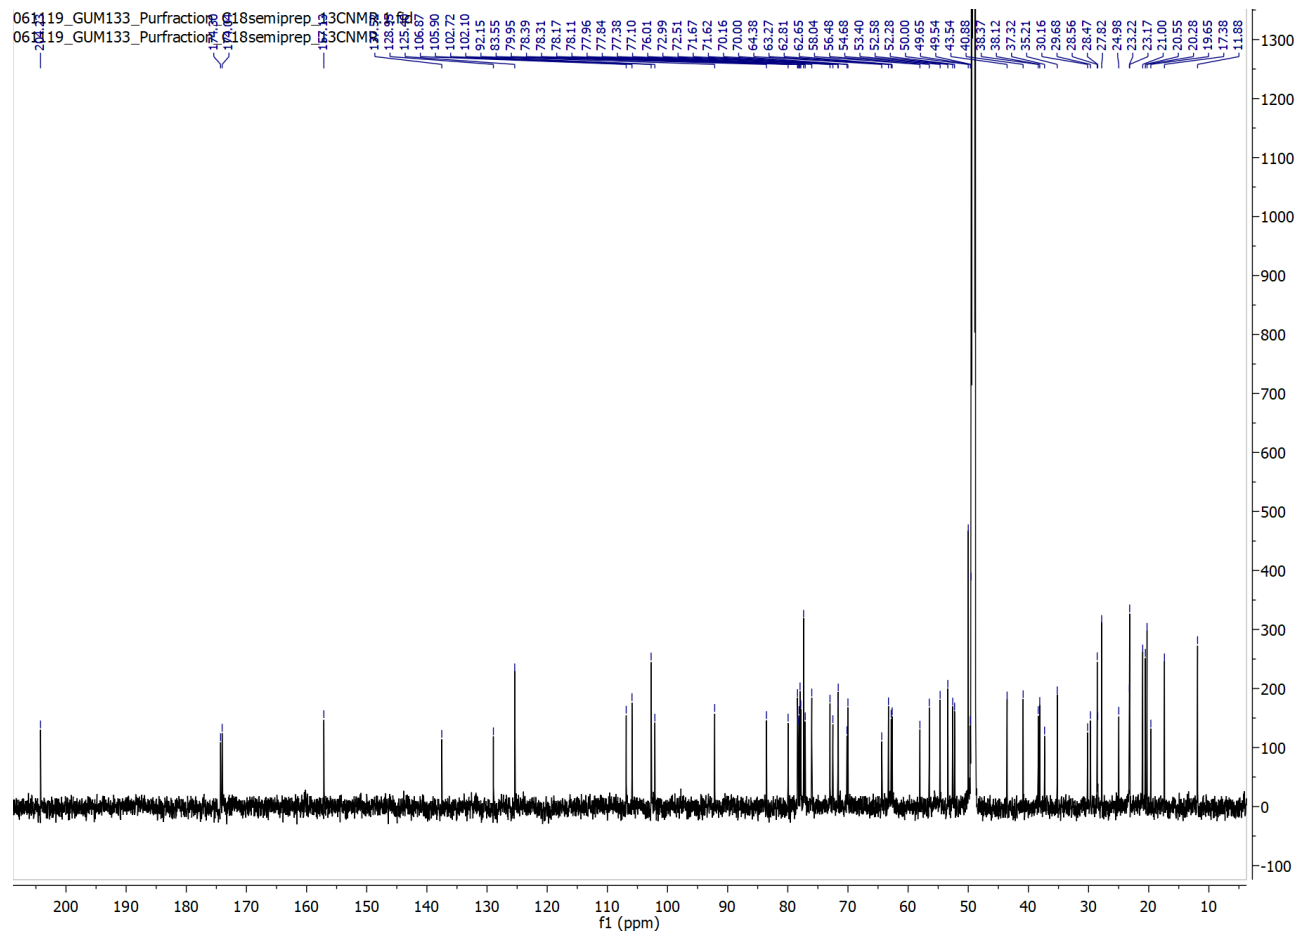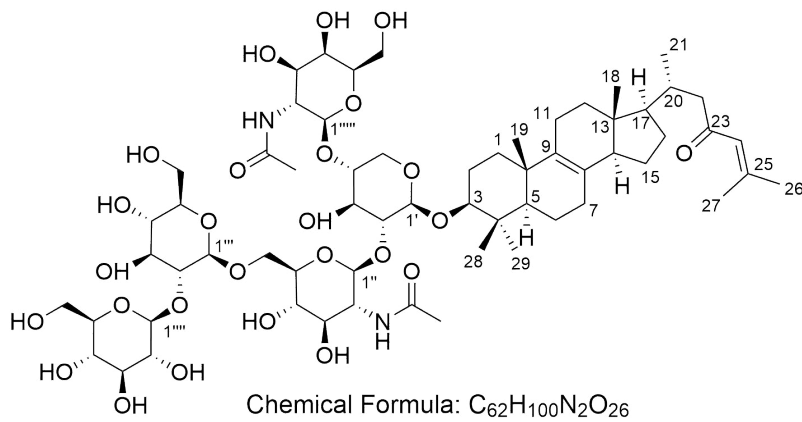

**Fig S3:** <sup>13</sup>C-NMR spectra for **1** in CD<sub>3</sub>OD.

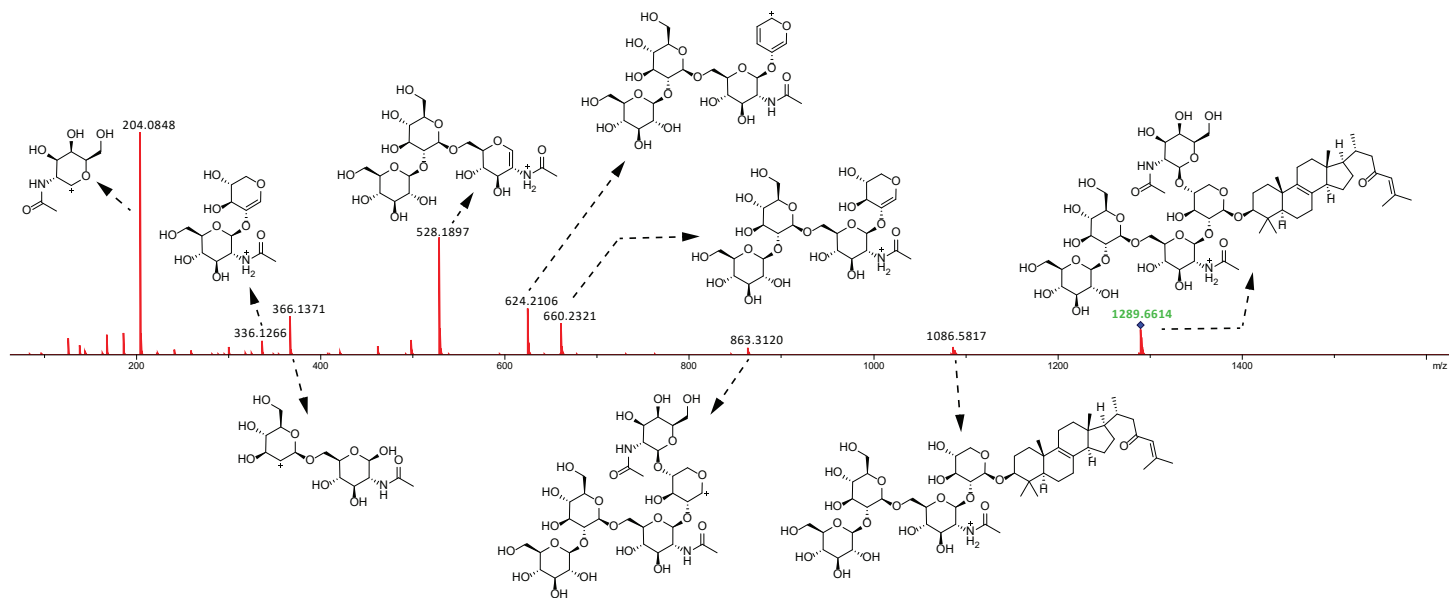

**Fig. S4:** Structural annotation of the MS<sup>2</sup> spectra for 1.

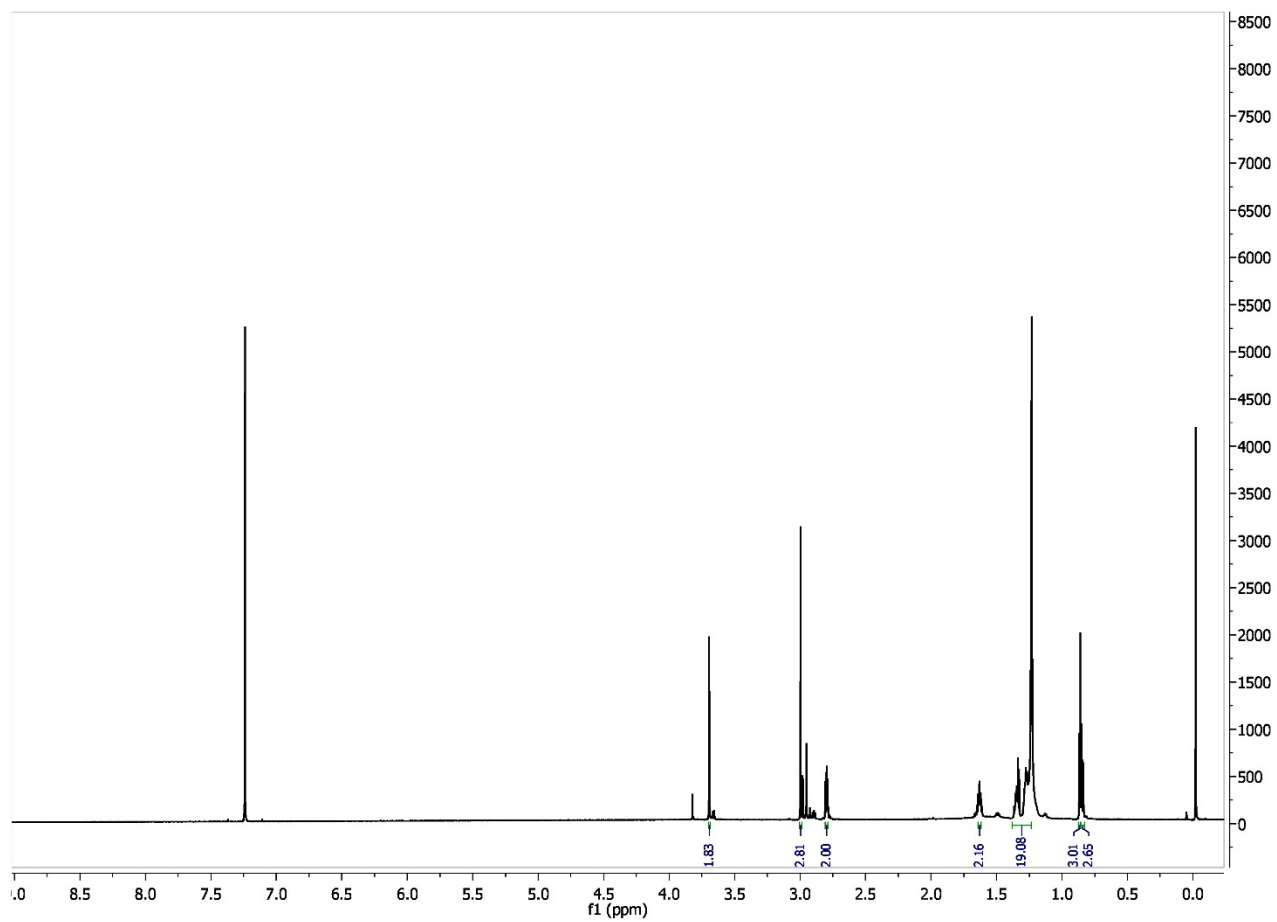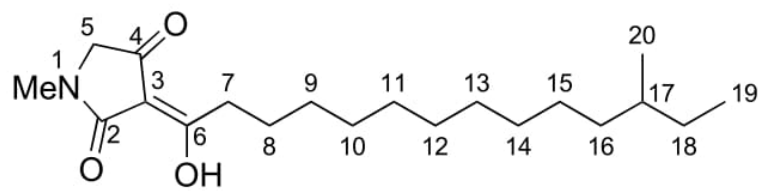

Chemical Formula:  $C_{20}H_{35}NO_3$

Fig. S5:  $^1H$ -NMR for **3** in  $CDCl_3$ .

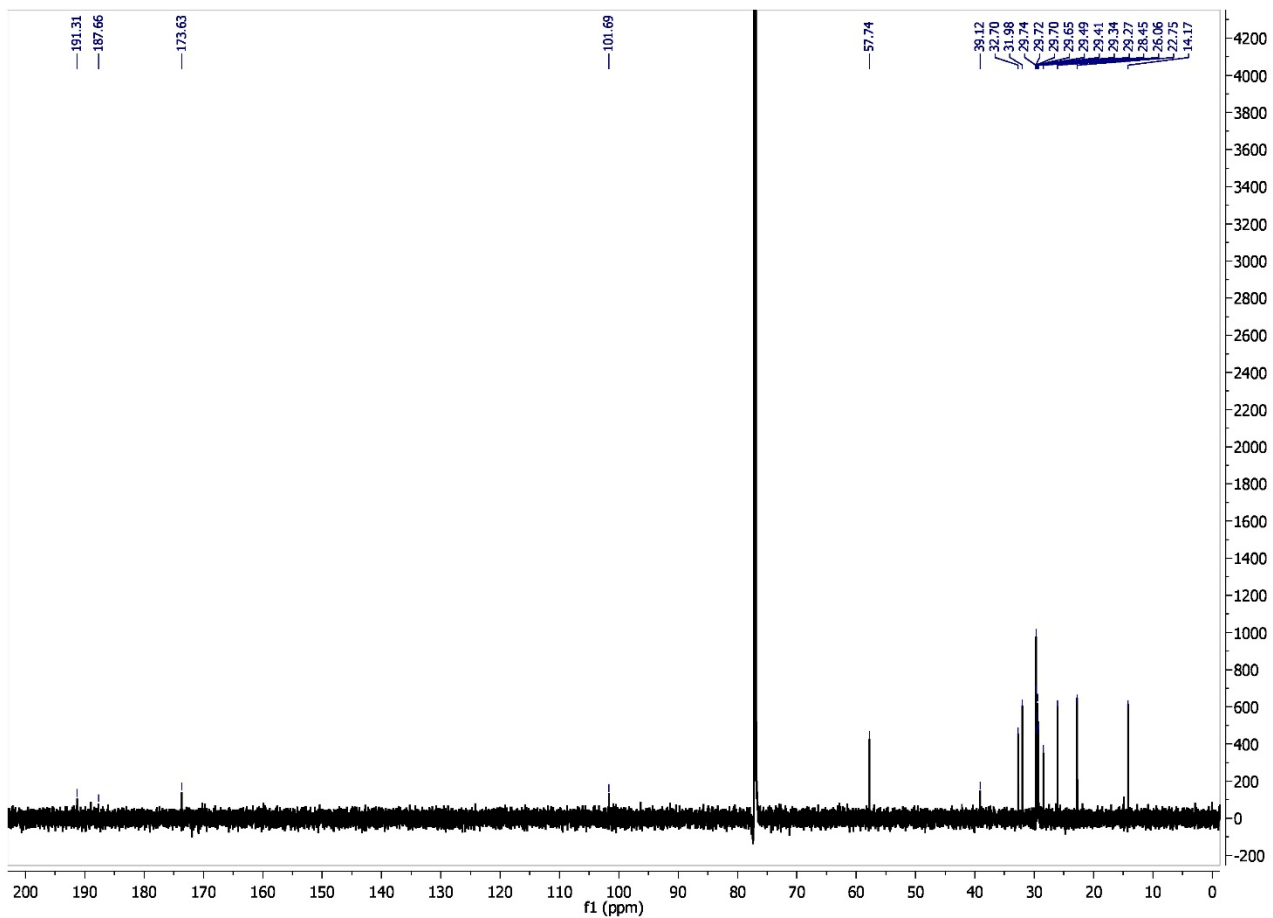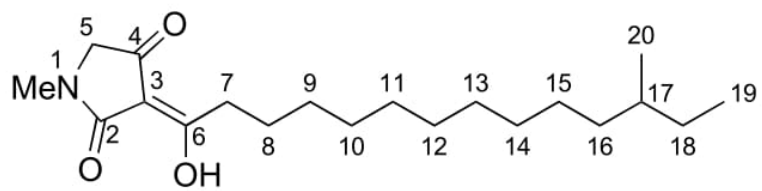

Chemical Formula: C<sub>20</sub>H<sub>35</sub>NO<sub>3</sub>

Fig. S6: <sup>13</sup>C-NMR for 3 in CDCl<sub>3</sub>.

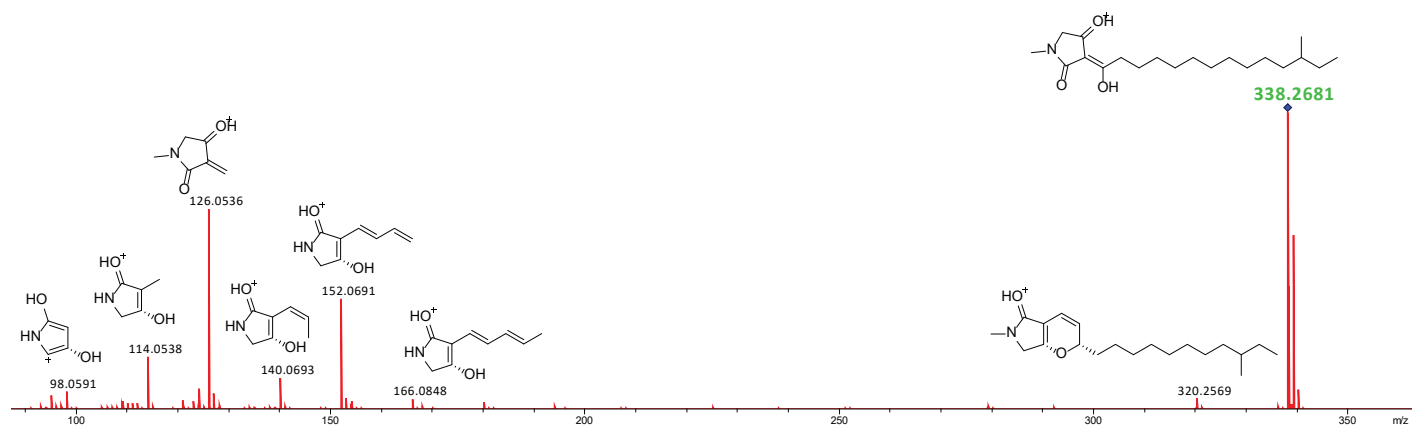

**Fig. S7:** Structural annotation of the MS<sup>2</sup> spectra for **3**.



**SUPPLEMENTARY TABLES**

**Table S1:** Percentage identity matrix for Meloplus sponges as generated by EMBL-EBI Clustal Omega [1]

|          |           |        |        |         |         |
|----------|-----------|--------|--------|---------|---------|
| ITS-2    | Sponge_ID | GUM_22 | GUM_59 | GUM_133 | GUM_139 |
|          | GUM_22    | 100.00 | 100.00 | 100.00  | 100.00  |
|          | GUM_59    | 100.00 | 100.00 | 100.00  | 100.00  |
|          | GUM_133   | 100.00 | 100.00 | 100.00  | 100.00  |
|          | GUM_139   | 100.00 | 100.00 | 100.00  | 100.00  |
| 28S rRNA | Sponge_ID | GUM_22 | GUM_59 | GUM_133 | GUM_139 |
|          | GUM_22    | 100.00 | 100.00 | 43.85   | 44.28   |
|          | GUM_59    | 100.00 | 100.00 | 43.85   | 44.28   |
|          | GUM_133   | 43.85  | 43.85  | 100.00  | 99.70   |
|          | GUM_139   | 44.28  | 44.28  | 99.70   | 100.00  |

**Table S2:** Sarasinoside congeners detected in this study and deposited to GNPS [ref: 2-9]

| Natural product | Chemical structure                                                                  | Exact mass | Reference | GNPS SpectrumID                    |
|-----------------|-------------------------------------------------------------------------------------|------------|-----------|------------------------------------|
| Sarasinose A1   | 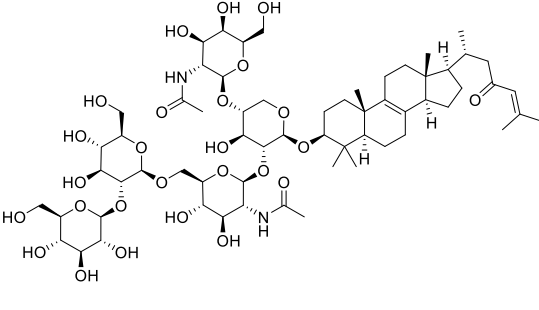   | 1288.6564  | 2         | <a href="#">CMSLIB0005436303</a>   |
| Sarasinose A2   |   | 1286.6408  | 3         | <a href="#">CCMSLIB00005436473</a> |
| Sarasinose A3   |  | 1286.6408  | 3         | <a href="#">CCMSLIB00005436473</a> |
| Sarasinose A4   |  | 1302.6357  | 4         | <a href="#">CCMSLIB00005436474</a> |

|                 |  |           |   |                                      |
|-----------------|--|-----------|---|--------------------------------------|
| Sarasinoside A5 |  | 1302.6357 | 4 | <u>CCMSLIB000</u><br><u>05436474</u> |
| Sarasinoside B1 |  | 1258.6459 | 3 | <u>CCMSLIB000</u><br><u>05436458</u> |
| Sarasinoside B2 |  | 1256.6302 | 3 | <u>CCMSLIB000</u><br><u>05436475</u> |
| Sarasinoside B3 |  | 1256.6302 | 3 | <u>CCMSLIB000</u><br><u>05436475</u> |
| Sarasioside C1  |  | 1096.5930 | 3 | <u>CCMSLIB000</u><br><u>05436467</u> |

|                 |  |           |   |                                                        |
|-----------------|--|-----------|---|--------------------------------------------------------|
| Sarasinoside C2 |  | 1094.5774 | 3 | Not detected in datasets used in this study            |
| Sarasinoside C3 |  | 1094.5774 | 3 | Not detected in datasets used in this study            |
| Sarasinoside D  |  | 1290.6721 | 5 | Not detected in datasets used in this study            |
| Sarasinoside E  |  | 1290.6357 | 5 | <a href="#">CCMSLIB000</a><br><a href="#">05436468</a> |
| Sarasinoside F  |  | 1304.6513 | 5 | Not detected in datasets used in this study            |

|                 |  |           |   |                                      |
|-----------------|--|-----------|---|--------------------------------------|
| Sarasinoside G  |  | 1272.6615 | 5 | <u>CCMSLIB000</u><br><u>05436476</u> |
| Sarasinoside H1 |  | 1320.6463 | 6 | <u>CCMSLIB000</u><br><u>05436481</u> |
| Sarasinoside H2 |  | 1334.6619 | 6 | <u>CCMSLIB000</u><br><u>05436480</u> |
| Sarasinoside I1 |  | 1320.6463 | 6 | <u>CCMSLIB000</u><br><u>05436481</u> |
| Sarasinoside I2 |  | 1334.6619 | 6 | <u>CCMSLIB000</u><br><u>05436480</u> |

|                 |                                                                                     |           |   |                                             |
|-----------------|-------------------------------------------------------------------------------------|-----------|---|---------------------------------------------|
| Sarasinoside J  | 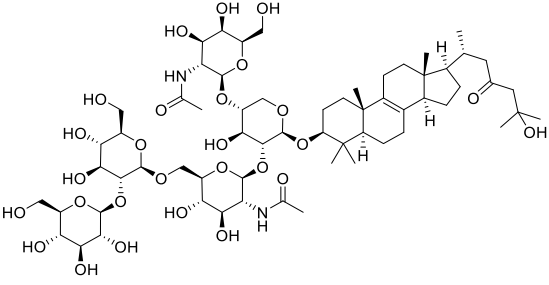   | 1306.6670 | 7 | Not detected in datasets used in this study |
| Sarasinoside K  |    | 1352.6725 | 7 | Not detected in datasets used in this study |
| Sarasinoside L  |   | 1318.6306 | 7 | <a href="#">CCMSLIB00005436477</a>          |
| Sarasinoside M  |  | 1302.6357 | 7 | <a href="#">CCMSLIB00005436474</a>          |
| Sarasinoside M2 |  | 1272.6251 | 9 | <a href="#">CCMSLIB00005436478</a>          |

|                |  |           |   |                                      |
|----------------|--|-----------|---|--------------------------------------|
| Sarasinoside N |  | 964.5508  | 8 | <u>CCMSLIB000</u><br><u>05436461</u> |
| Sarasinoside O |  | 1320.6463 | 8 | <u>CCMSLIB000</u><br><u>05436481</u> |
| Sarasinoside P |  | 1320.6463 | 8 | <u>CCMSLIB000</u><br><u>05436481</u> |
| Sarasinoside Q |  | 1320.6463 | 8 | <u>CCMSLIB000</u><br><u>05436481</u> |
| Sarasinoside R |  | 1320.6463 | 8 | <u>CCMSLIB000</u><br><u>05436481</u> |

**Table S3:** Melophlins congeners detected in this study and deposited to GNPS [ref: 10-12]

| Natural product | Chemical structure                                                                  | Exact mass | Reference | GNPS SpectrumID                    |
|-----------------|-------------------------------------------------------------------------------------|------------|-----------|------------------------------------|
| Melophlin A     | 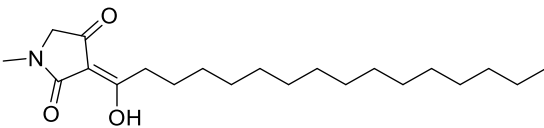   | 351.2773   | 10        | <a href="#">CCMSLIB00005436504</a> |
| Melophlin B     |    | 323.246    | 10        | <a href="#">CCMSLIB00005436512</a> |
| Melophlin C     |    | 323.246    | 11        | <a href="#">CCMSLIB00005436512</a> |
| Melophlin D     |   | 337.2617   | 11        | <a href="#">CCMSLIB00005436513</a> |
| Melophlin E     |  | 351.2773   | 11        | <a href="#">CCMSLIB00005436504</a> |
| Melophlin F     |  | 351.2773   | 11        | <a href="#">CCMSLIB00005436504</a> |
| Melophlin G     |  | 323.246    | 11        | <a href="#">CCMSLIB00005436512</a> |
| Melophlin H     |  | 337.2617   | 11        | <a href="#">CCMSLIB00005436513</a> |



|             |                                                                                     |          |    |                                      |
|-------------|-------------------------------------------------------------------------------------|----------|----|--------------------------------------|
| Melophlin I | 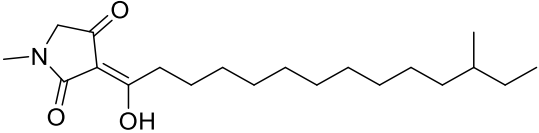   | 337.2617 | 11 | <u>CCMSLIB000</u><br><u>05436513</u> |
| Melophlin J |    | 337.2617 | 11 | <u>CCMSLIB000</u><br><u>05436513</u> |
| Melophlin K |    | 323.246  | 11 | <u>CCMSLIB000</u><br><u>05436512</u> |
| Melophlin L |    | 323.246  | 11 | <u>CCMSLIB000</u><br><u>05436512</u> |
| Melophlin M |   | 309.2304 | 11 | <u>CCMSLIB000</u><br><u>05436514</u> |
| Melophlin N |  | 323.246  | 11 | <u>CCMSLIB000</u><br><u>05436512</u> |
| Melophlin O |  | 323.246  | 11 | <u>CCMSLIB000</u><br><u>05436512</u> |
| Melophlin P |  | 365.293  | 12 | <u>CCMSLIB000</u><br><u>05436515</u> |
| Melophlin Q |  | 351.2773 | 12 | <u>CCMSLIB000</u><br><u>05436504</u> |

|             |                                                                                   |          |    |                                      |
|-------------|-----------------------------------------------------------------------------------|----------|----|--------------------------------------|
| Melophlin R | 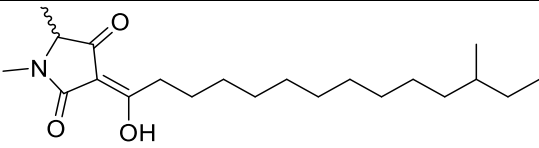 | 351.2773 | 12 | <u>CCMSLIB000</u><br><u>05436504</u> |
| Melophlin S |  | 351.2773 | 12 | <u>CCMSLIB000</u><br><u>05436504</u> |

**Table S4:** Table representing representative features that are shared among sponge specimens used in this study as denoted in Fig. 1E in the main text

| <b>Sponge code</b>               | <b>Total number of features</b> | <b>Sarasinoides and Melophlins Features (<i>m/z</i>)</b>                                                                                         |
|----------------------------------|---------------------------------|--------------------------------------------------------------------------------------------------------------------------------------------------|
| GUM_22, GUM_59, GUM_133, GUM_139 | 930                             | 1321.651, 1319.6469, 1303.6422, 1291.6422, 1289.6624, 1287.6479, 1259.6532, 1257.638, 965.5576, 366.2992, 352.2841, 338.2687, 324.2533, 310.2369 |
| GUM_22, GUM_59                   | 70                              | 1291.6415, 1273.6682, 1273.6321                                                                                                                  |
| GUM_133, GUM_139                 | 76                              | 324.2522                                                                                                                                         |

**Table S5:**  $^{13}\text{C}$  and  $^1\text{H}$  NMR data for **1** in  $\text{CD}_3\text{OD}$ 

| <b>Sterol</b>   |                     |                             |
|-----------------|---------------------|-----------------------------|
| <b>Position</b> | $\delta_{\text{C}}$ | $\delta_{\text{H}}$ (mult.) |
| 1               | 37.32               | 1.21 (m)<br>1.7 (m)         |
| 2               | 28.47               | 1.73 (m)<br>1.82 (m)        |
| 3               | 92.16               | 3.05                        |
| 4               | 40.88               |                             |
| 5               | 49.65               | 1.12 (m)                    |
| 6               | 19.65               | 1.51 (m)<br>1.72 (m)        |
| 7               | 29.86               | 1.74 (m)<br>1.98 (m)        |
| 8               | 128.95              |                             |
| 9               | 137.52              |                             |
| 10              | 38.12               |                             |
| 11              | 21.0                | 1.97 (m)<br>2.07 (m)        |
| 12              | 38.37               | 1.40 (m)<br>1.86 (m)        |
| 13              | 43.54               |                             |
| 14              | 56.48               | 2.06 (m)                    |
| 15              | 24.98               | 1.36 (m)<br>1.63 (m)        |
| 16              | 30.16               | 1.34 (m)<br>1.89 (m)        |
| 17              | 53.4                | 1.17 (m)                    |
| 18              | 11.88               | 0.66 (s)                    |
| 19              | 20.55               | 1.01 (s)                    |
| 20              | 35.21               | 2.10 (m)                    |
| 21              | 20.28               | 0.91 (d)                    |
| 22              | 52.28               | 2.52<br>2.09 (m)            |
| 23              | 204.23              |                             |
| 24              | 125.4               | 6.17 (s)                    |
| 25              | 157.13              |                             |
| 26              | 50.0                | 2.12 (s)                    |
| 27              | 28.56               | 1.91 (s)                    |
| 28              | 17.38               | 0.92 (d)                    |
| 29              | 27.82               | 1.10 (s)                    |
| <b>Xylose</b>   |                     |                             |
| <b>Position</b> | $\delta_{\text{C}}$ | $\delta_{\text{H}}$ (mult.) |
| 1'              | 106.87              | 4.29 (d)                    |

|    |       |          |
|----|-------|----------|
| 2' | 78.31 | 4.10 (d) |
| 3' | 52.58 | 3.51 (m) |
| 4' | 79.95 | 3.68 (m) |
| 5' | 64.38 | 3.14 (m) |
|    |       | 3.88 (m) |

**N-acetylglucosamine**

|     |       |          |
|-----|-------|----------|
| 1'' | 102.1 | 4.82 (m) |
| 2'' | 58.04 | 3.68 (m) |
| 3'' | 77.1  | 3.41 (m) |
| 4'' | 72.51 | 3.16 (m) |
| 5'' | 78.11 | 3.63 (m) |
| 6'' | 70    | 3.91 (m) |
|     |       | 3.77 (m) |

|    |       |          |
|----|-------|----------|
| Ac | 23.17 | 2.00 (s) |
|    | 174.3 |          |

**Glucose-I**

|      |        |          |
|------|--------|----------|
| 1''' | 102.72 | 5.08 (d) |
| 2''' | 83.55  | 3.34 (m) |
| 3''' | 77.96  | 3.68 (m) |
| 4''' | 71.67  | 3.28 (m) |
| 5''' | 77.38  | 3.41 (m) |
| 6''' | 62.65  | 3.70 (m) |
|      |        | 3.83 (m) |

**Glucose-II**

|       |       |          |
|-------|-------|----------|
| 1'''' | 105.9 | 4.62 (d) |
| 2'''' | 76.01 | 3.40 (m) |
| 3'''' | 77.84 | 3.40 (m) |
| 4'''' | 71.62 | 3.29 (m) |
| 5'''' | 78.17 | 3.27 (m) |
| 6'''' | 62.81 | 3.71 (m) |
|       |       | 3.91 (m) |

**N-acetylgalactosamine**

|        |        |          |
|--------|--------|----------|
| 1''''' | 102.72 | 4.49 (d) |
| 2''''' | 54.68  | 3.85 (m) |
| 3''''' | 72.99  | 3.63 (m) |
| 4''''' | 70.16  | 3.78 (m) |
| 5''''' | 78.39  | 3.63 (m) |
| 6''''' | 63.27  | 3.72 (m) |
|        |        | 3.88 (m) |

|    |        |          |
|----|--------|----------|
| Ac | 23.33  | 1.99 (s) |
|    | 174.04 |          |

**Table S6:** Table of retention times and precursor intensities for parent ion  $m/z$  1321.65 condensed into a single node in molecular networking

| <b>Scan number</b> | <b>Dataset</b> | <b>Precursor intensity</b> | <b>Retention time (min)</b> | <b>Parent Mass</b> |
|--------------------|----------------|----------------------------|-----------------------------|--------------------|
| 1779               | GUM22_2        | 9417                       | 6.53                        | 1321.640           |
| 1787               | GUM22_2        | 11148                      | 6.55                        | 1321.640           |
| 1802               | GUM139_2       | 21563                      | 6.58                        | 1321.650           |
| 1799               | GUM22_1        | 53127                      | 6.59                        | 1321.650           |
| 1800               | GUM139_1       | 35206                      | 6.60                        | 1321.650           |
| 1801               | GUM133_1       | 44109                      | 6.60                        | 1321.650           |
| 1808               | GUM133_2       | 39361                      | 6.61                        | 1321.650           |
| 1808               | GUM133_1       | 32753                      | 6.62                        | 1321.650           |
| 1811               | GUM22_1        | 20689                      | 6.63                        | 1321.650           |
| 1819               | GUM139_2       | 24469                      | 6.64                        | 1321.650           |
| 1818               | GUM133_2       | 21968                      | 6.64                        | 1321.650           |
| 1828               | GUM139_2       | 23563                      | 6.67                        | 1321.650           |
| 1836               | GUM139_1       | 29602                      | 6.71                        | 1321.650           |
| 1843               | GUM133_1       | 19952                      | 6.73                        | 1321.650           |
| 1865               | GUM22_1        | 44040                      | 6.80                        | 1321.650           |
| 1885               | GUM139_1       | 33586                      | 6.87                        | 1321.650           |
| 1889               | GUM139_1       | 37377                      | 6.88                        | 1321.650           |
| 1925               | GUM133_2       | 58829                      | 6.98                        | 1321.650           |
| 1934               | GUM133_2       | 55569                      | 7.01                        | 1321.650           |
| 1936               | GUM139_2       | 67727                      | 7.01                        | 1321.650           |
| 1937               | GUM22_2        | 22207                      | 7.03                        | 1321.650           |
| 1946               | GUM139_2       | 44898                      | 7.04                        | 1321.650           |
| 1945               | GUM22_2        | 30922                      | 7.06                        | 1321.650           |
| 1961               | GUM133_1       | 193956                     | 7.11                        | 1321.650           |
| 1962               | GUM139_1       | 104484                     | 7.11                        | 1321.650           |
| 1969               | GUM133_1       | 56838                      | 7.13                        | 1321.650           |
| 2012               | GUM22_2        | 11673                      | 7.27                        | 1321.650           |
| 2012               | GUM22_1        | 17322                      | 7.27                        | 1321.650           |

**Table S7:**  $^{13}\text{C}$  and  $^1\text{H}$  NMR data for **3** in  $\text{CDCl}_3$ 

| <b>Position</b>   | $\delta_{\text{C}}$ | $\delta_{\text{H}}$ (mult.) |
|-------------------|---------------------|-----------------------------|
| 1                 |                     |                             |
| 2                 | 173.63              |                             |
| 3                 | 101.69              |                             |
| 4                 | 191.31              |                             |
| 5                 | 57.74               | 3.69 (s)                    |
| 6                 | 187.66              |                             |
| 7                 | 31.98               | 2.80 (t)                    |
| 8                 | 26.06               | 1.63 (m)                    |
| 9-15              | 29.27-29.71         | 1.12 – 1.39 (m)             |
| 16                | 39.12               | 1.12 – 1.39 (m)             |
| 17                | 32.7                | 1.12 – 1.39 (m)             |
| 18                | 29.74               | 1.12 – 1.39 (m)             |
| 19                | 14.17               | 0.86 (t)                    |
| 20                | 22.75               | 0.84 (d)                    |
| N-CH <sub>3</sub> | 28.45               | 3.00 (s)                    |

## SUPPLEMENTARY REFERENCES

1. Madeira, F.; Park, Y. M.; Lee, J.; Buso, N.; Gur, T.; Madhusoodanan, N.; Basutkar, P.; Tivey, A. R. N.; Potter, S. C.; Finn, R. D.; Lopez, R., The EMBL-EBI search and sequence analysis tools APIs in 2019. *Nucleic Acids Res.* **2019**, *47*, (W1), 636-641.
2. Kitagawa, I.; Kobayashi, M.; Okamoto, Y.; Yoshikawa, M.; Hamamoto, Y., Structures of sarasinosides A1, B1, and C1; new norlanostane-triterpenoid oligoglycosides from the Palauan marine sponge *Asteropus sarasinorum*. *Chem. Pharm. Bull.* **1987**, *35*, (12), 5036-5039.
3. Motomasa, K.; Yoshihiro, O.; Isao, K., Marine Natural Products. XXVIII. The Structures of Sarasinosides A1, A2, A3, B1, B2, B3, C1, C2, and C3, Nine New Norlanostane-Triterpenoidal Oligoglycosides from the Palauan Marine Sponge *Asteropus sarasinorum*. *Chem. Pharm. Bull.* **1991**, *39*, (11), 2867-2877.
4. Santalova, E. A.; Denisenko, V. A.; Dmitrenok, P. S.; Berdyshev, D. V.; Stonik, V. A., Two New Sarasinosides from the Sponge *Melophlus sarasinorum*. *Nat. Prod. Commun.* **2006**, *1*, (4), 265-271.
5. Espada, A.; Jiménez, C.; Rodríguez, J.; Crews, P.; Riguera, R., Sarasinosides D-G: four new triterpenoid saponins from the sponge *asteropus sarasinorum*. *Tetrahedron* **1992**, *48*, (40), 8685-8696.
6. Lee, H.-S.; Seo, Y.; Cho, K. W.; Rho, J.-R.; Shin, J.; Paul, V. J., New Triterpenoid Saponins from the Sponge *Melophlus isis*. *J. Nat. Prod.* **2000**, *63*, (7), 915-919.
7. Dai, H.-F.; Edrada, R. A.; Ebel, R.; Nimtz, M.; Wray, V.; Proksch, P., Norlanostane Triterpenoidal Saponins from the Marine Sponge *Melophlus sarassinorum*. *J. Nat. Prod.* **2005**, *68*, (8), 1231-1237.
8. Lee, J.-H.; Jeon, J.-e.; Lee, Y.-J.; Lee, H.-S.; Sim, C. J.; Oh, K.-B.; Shin, J., Nortriterpene Glycosides of the Sarasinoside Class from the Sponge *Lipastrotethya* sp. *J. Nat. Prod.* **2012**, *75*, (7), 1365-1372.
9. Puilingi, C. G.; Kudo, Y.; Cho, Y.; Konoki, K.; Yotsu-Yamashita, M., A new sarasinoside congener, sarasinoside M2, from a marine sponge collected in the Solomon Islands. *Biosci. Biotechnol. Biochem.* **2017**, *81*, (2), 222-225.
10. Aoki, S.; Higuchi, K.; Ye, Y.; Satari, R.; Kobayashi, M., Melophlins A and B, Novel Tetramic Acids Reversing the Phenotype of ras-Transformed Cells, from the Marine Sponge *Melophlus sarassinorum*. *Tetrahedron* **2000**, *56*, (13), 1833-1836.
11. Wang, C. Y.; Wang, B. G.; Wiryowidagdo, S.; Wray, V.; van Soest, R.; Steube, K. G.; Guan, H. S.; Proksch, P.; Ebel, R., Melophlins C-O, thirteen novel tetramic acids from the marine sponge *Melophlus sarassinorum*. *J. Nat. Prod.* **2003**, *66*, (1), 51-56.
12. Xu, J.; Hasegawa, M.; Harada, K.; Kobayashi, H.; Nagai, H.; Namikoshi, M., Melophlins P, Q, R, and S: four new tetramic acid derivatives, from two Palauan marine sponges of the genus *Melophlus*. *Chem. Pharm. Bull.* **2006**, *54*, (6), 852-854.



urine\_mass2motif\_78.m2m

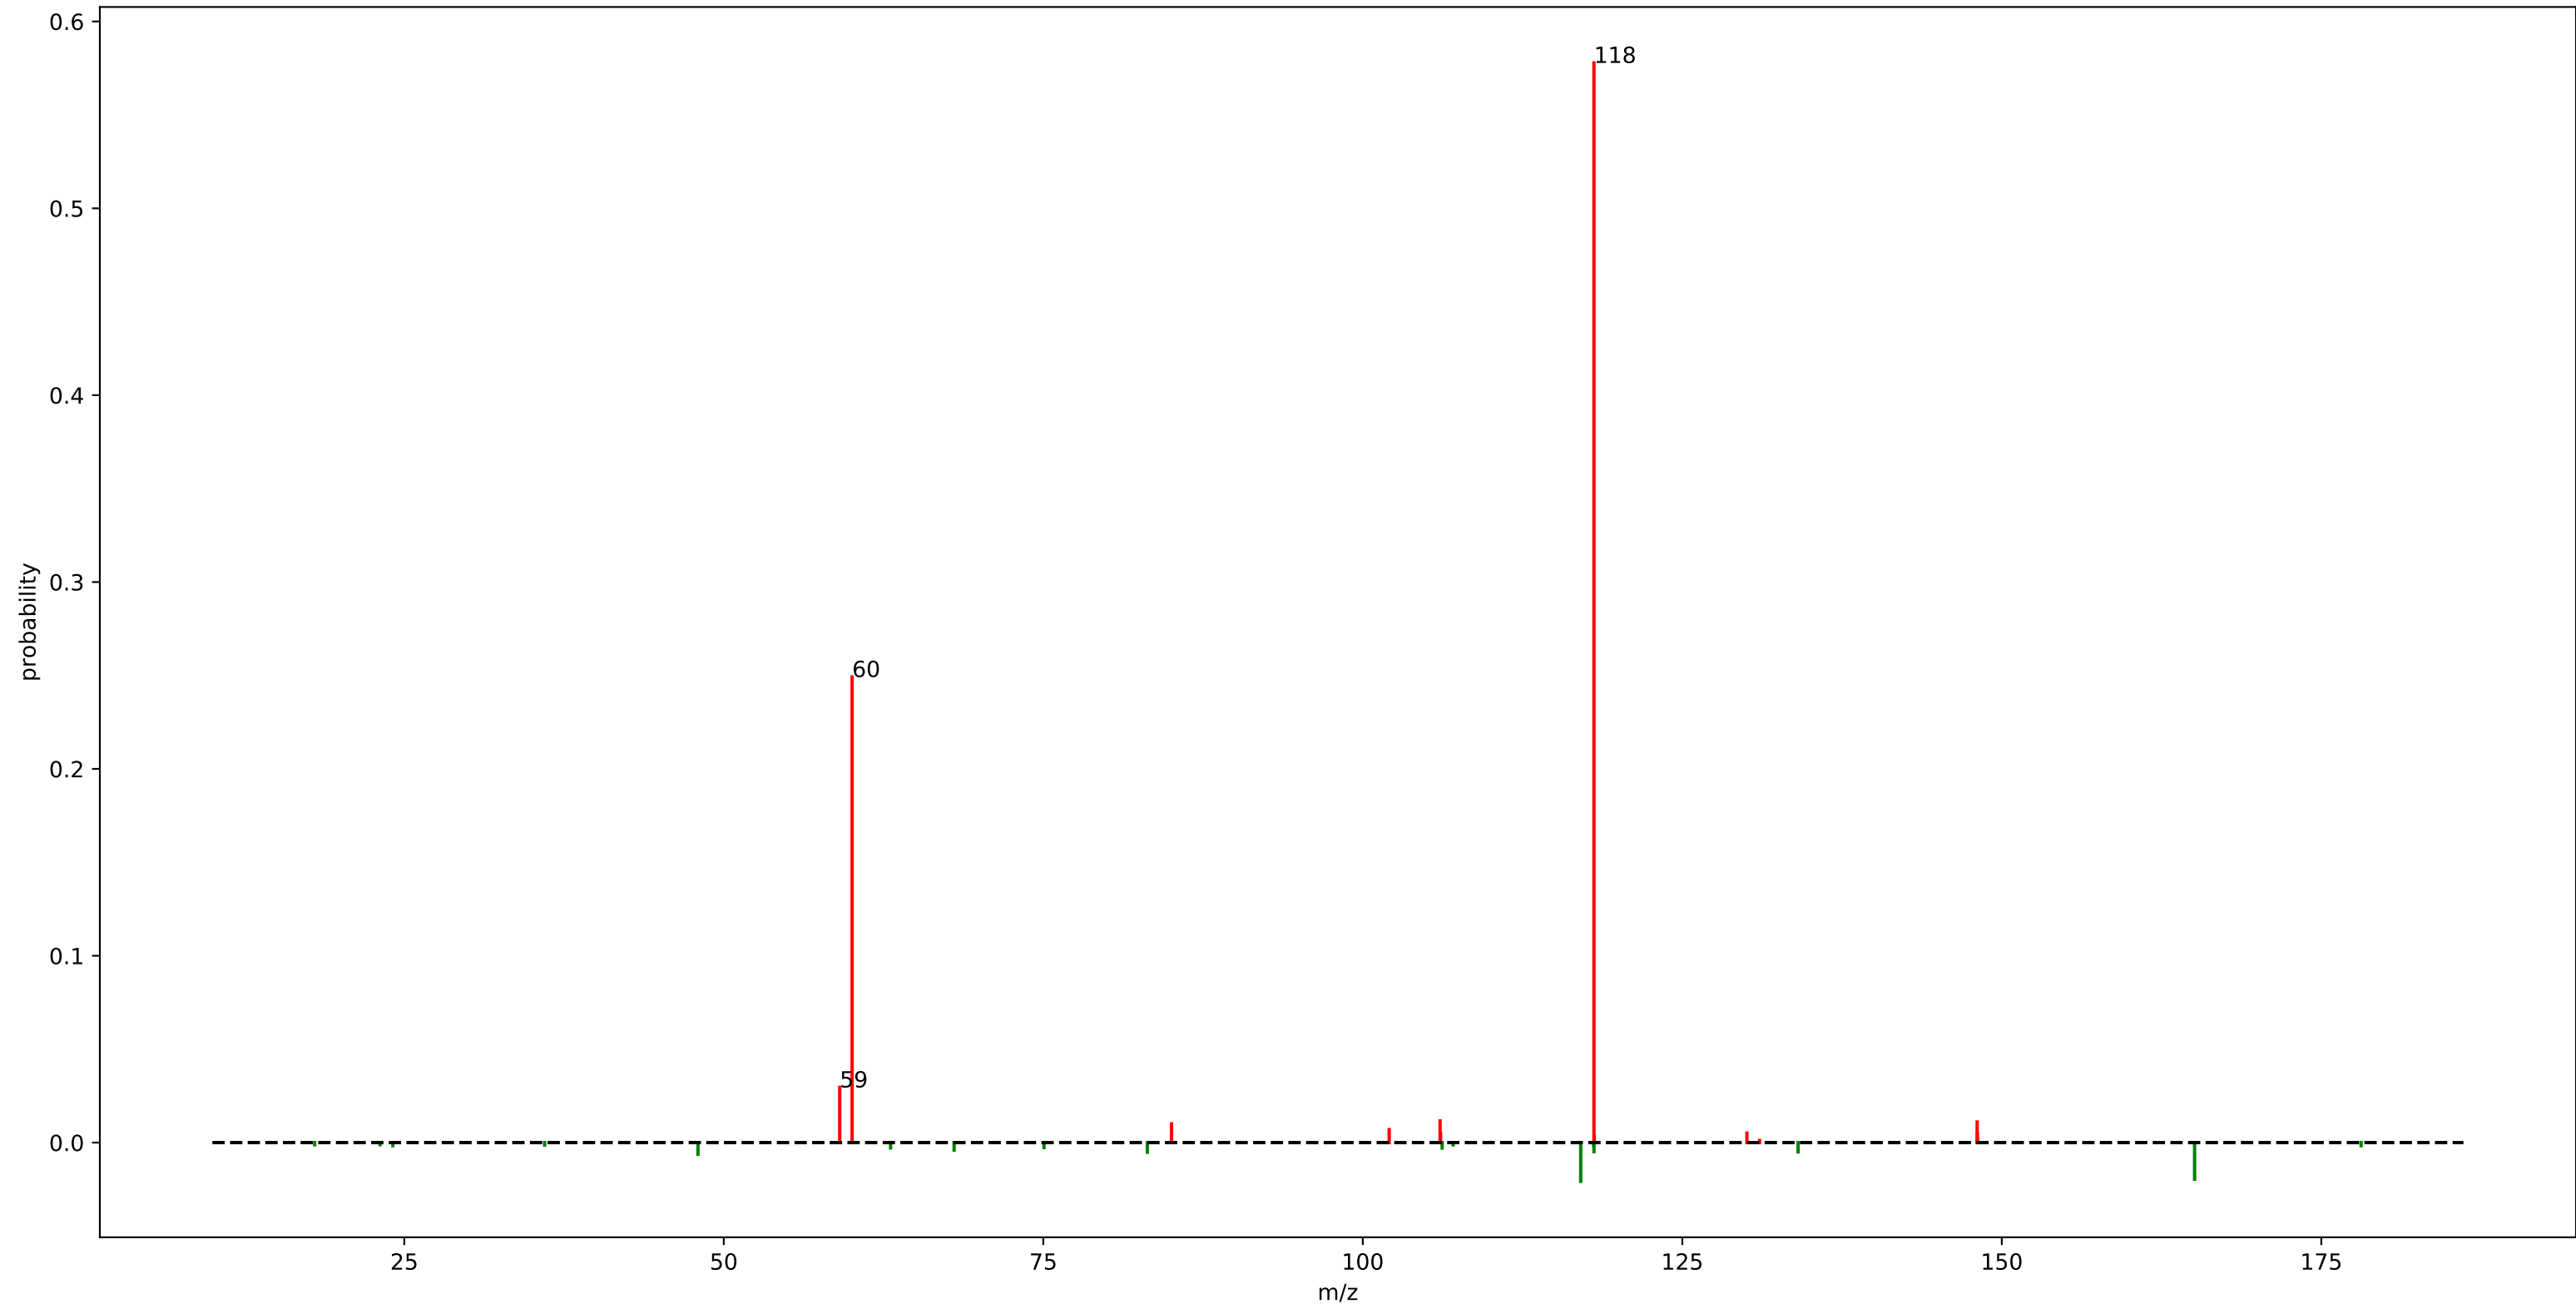

## urine\_mass2motif\_78.m2m

|                   |        |
|-------------------|--------|
| fragment_118.0875 | : 0.58 |
| fragment_60.0425  | : 0.25 |
| fragment_59.0725  | : 0.03 |
| loss_117.0525     | : 0.02 |
| loss_165.0875     | : 0.02 |
| fragment_106.0475 | : 0.01 |
| fragment_148.0725 | : 0.01 |
| fragment_85.0375  | : 0.01 |
| fragment_102.0675 | : 0.01 |
| loss_47.9825      | : 0.01 |
| loss_83.1425      | : 0.01 |
| fragment_130.0575 | : 0.01 |

motif\_624

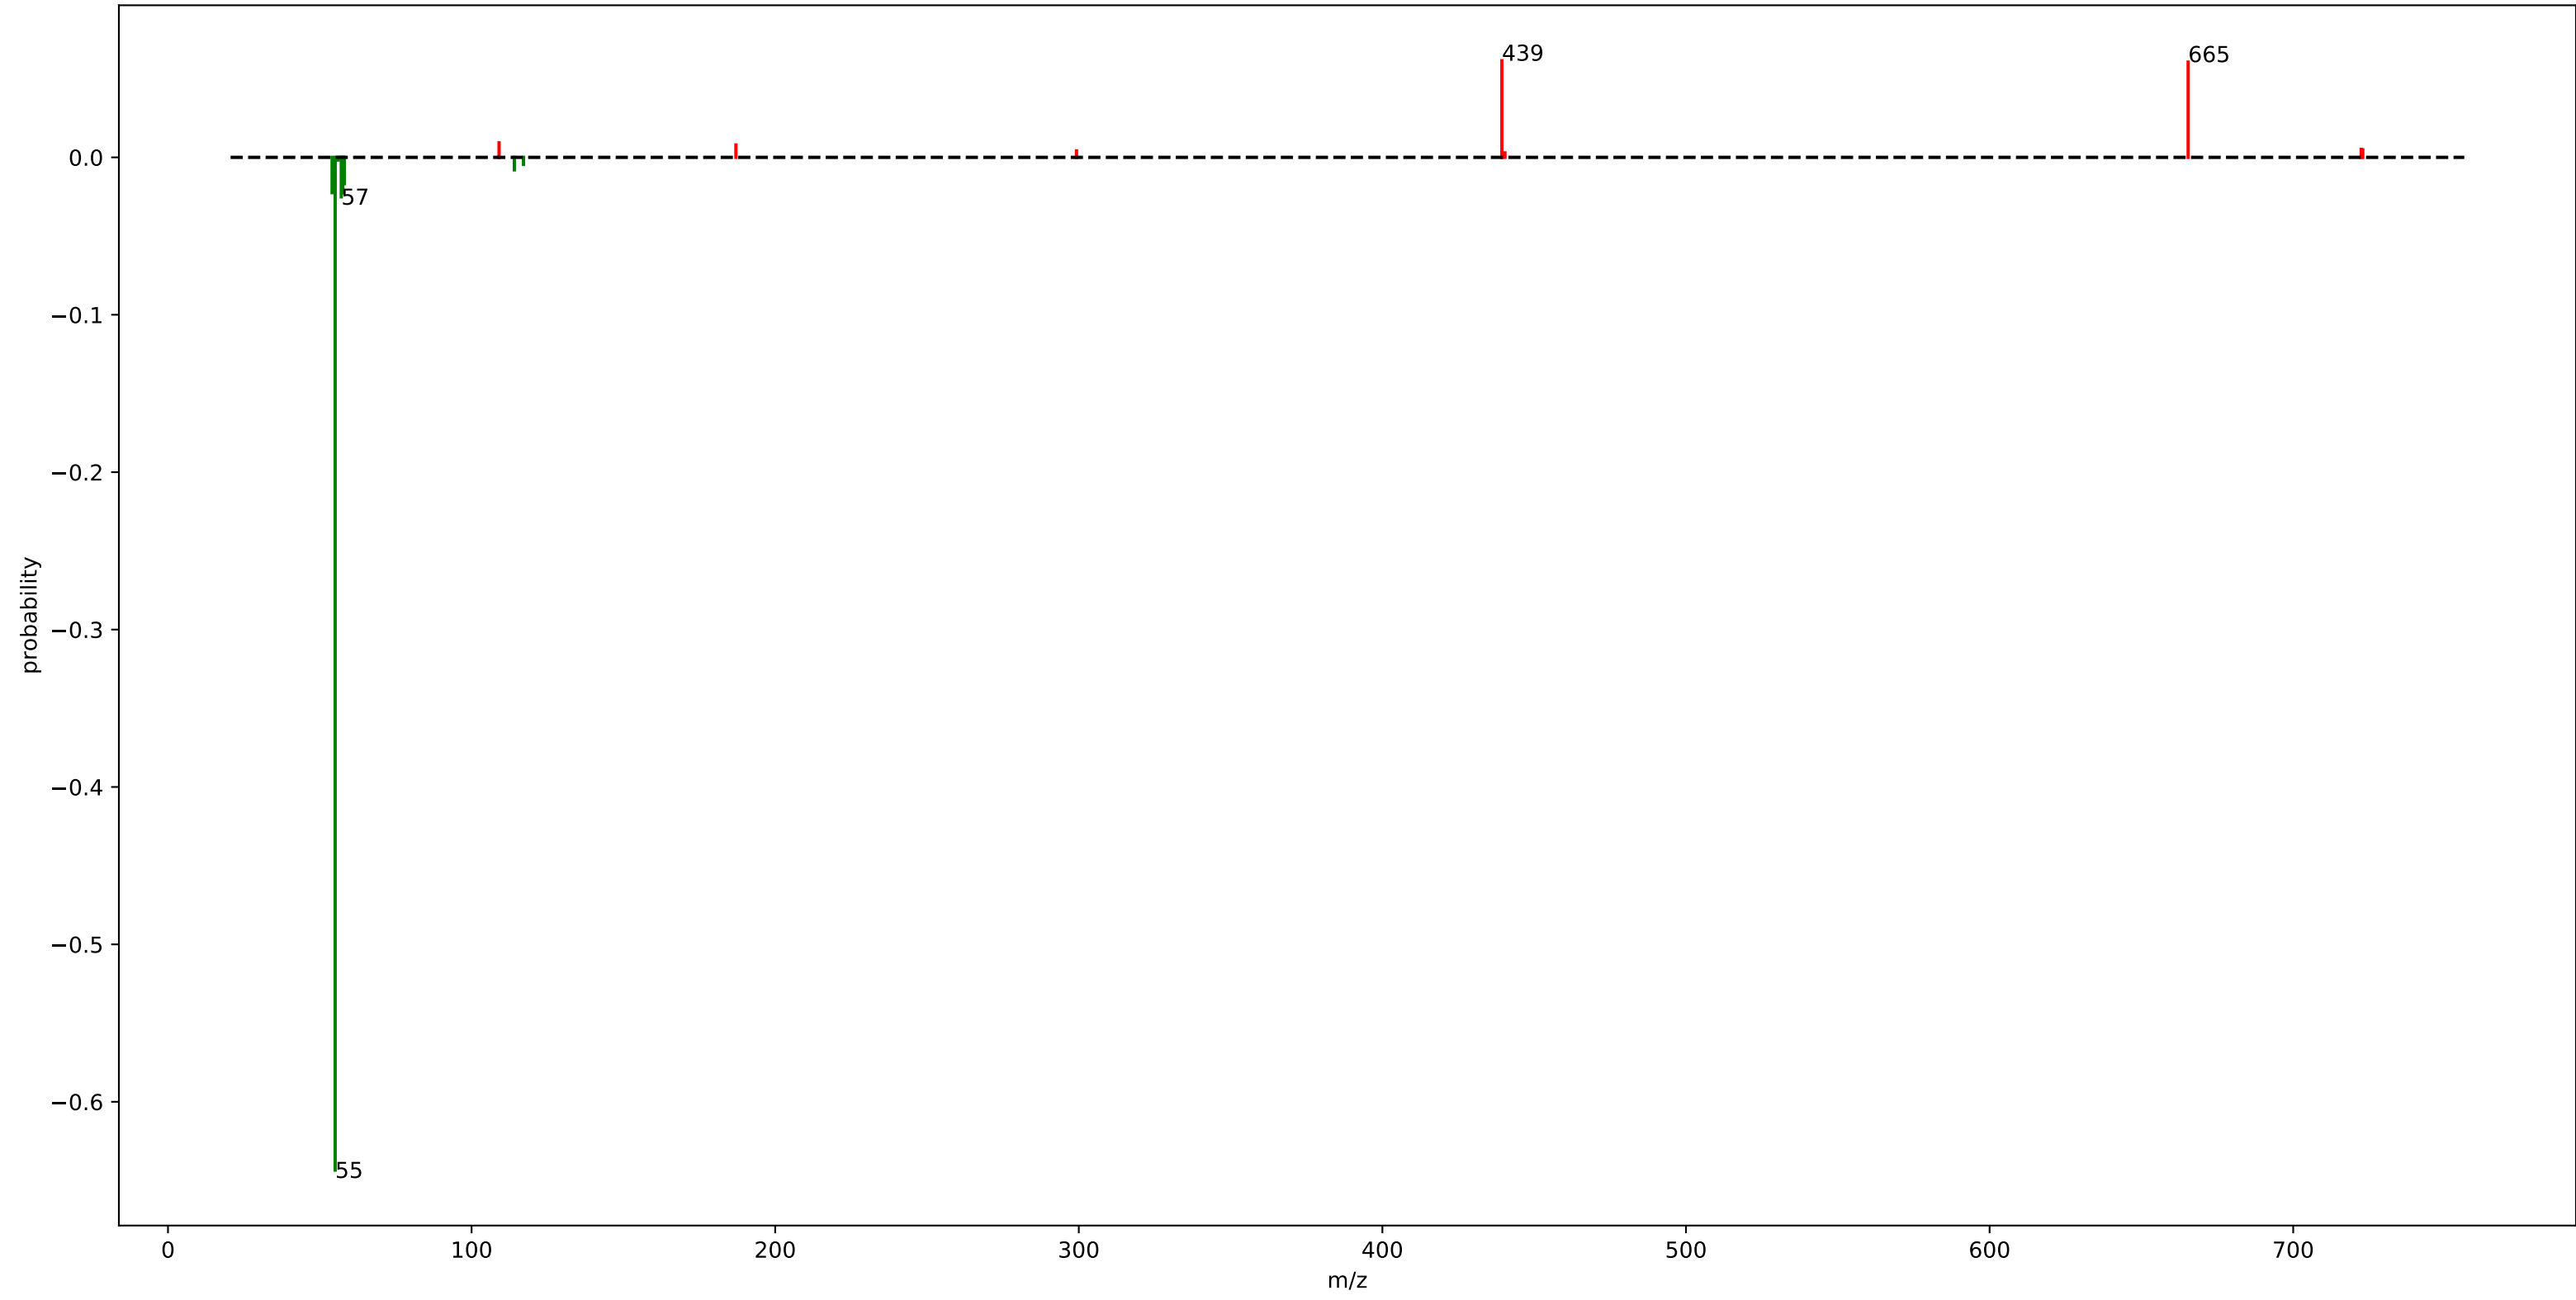

## motif\_624

|                   |        |
|-------------------|--------|
| loss_55.0625      | : 0.64 |
| fragment_439.3575 | : 0.06 |
| fragment_665.4025 | : 0.06 |
| loss_57.0775      | : 0.03 |
| loss_57.5675      | : 0.02 |
| loss_54.0575      | : 0.02 |
| loss_58.0675      | : 0.02 |
| fragment_109.0475 | : 0.01 |
| loss_114.0825     | : 0.01 |
| fragment_187.0675 | : 0.01 |
| fragment_722.4175 | : 0.01 |

motif\_627

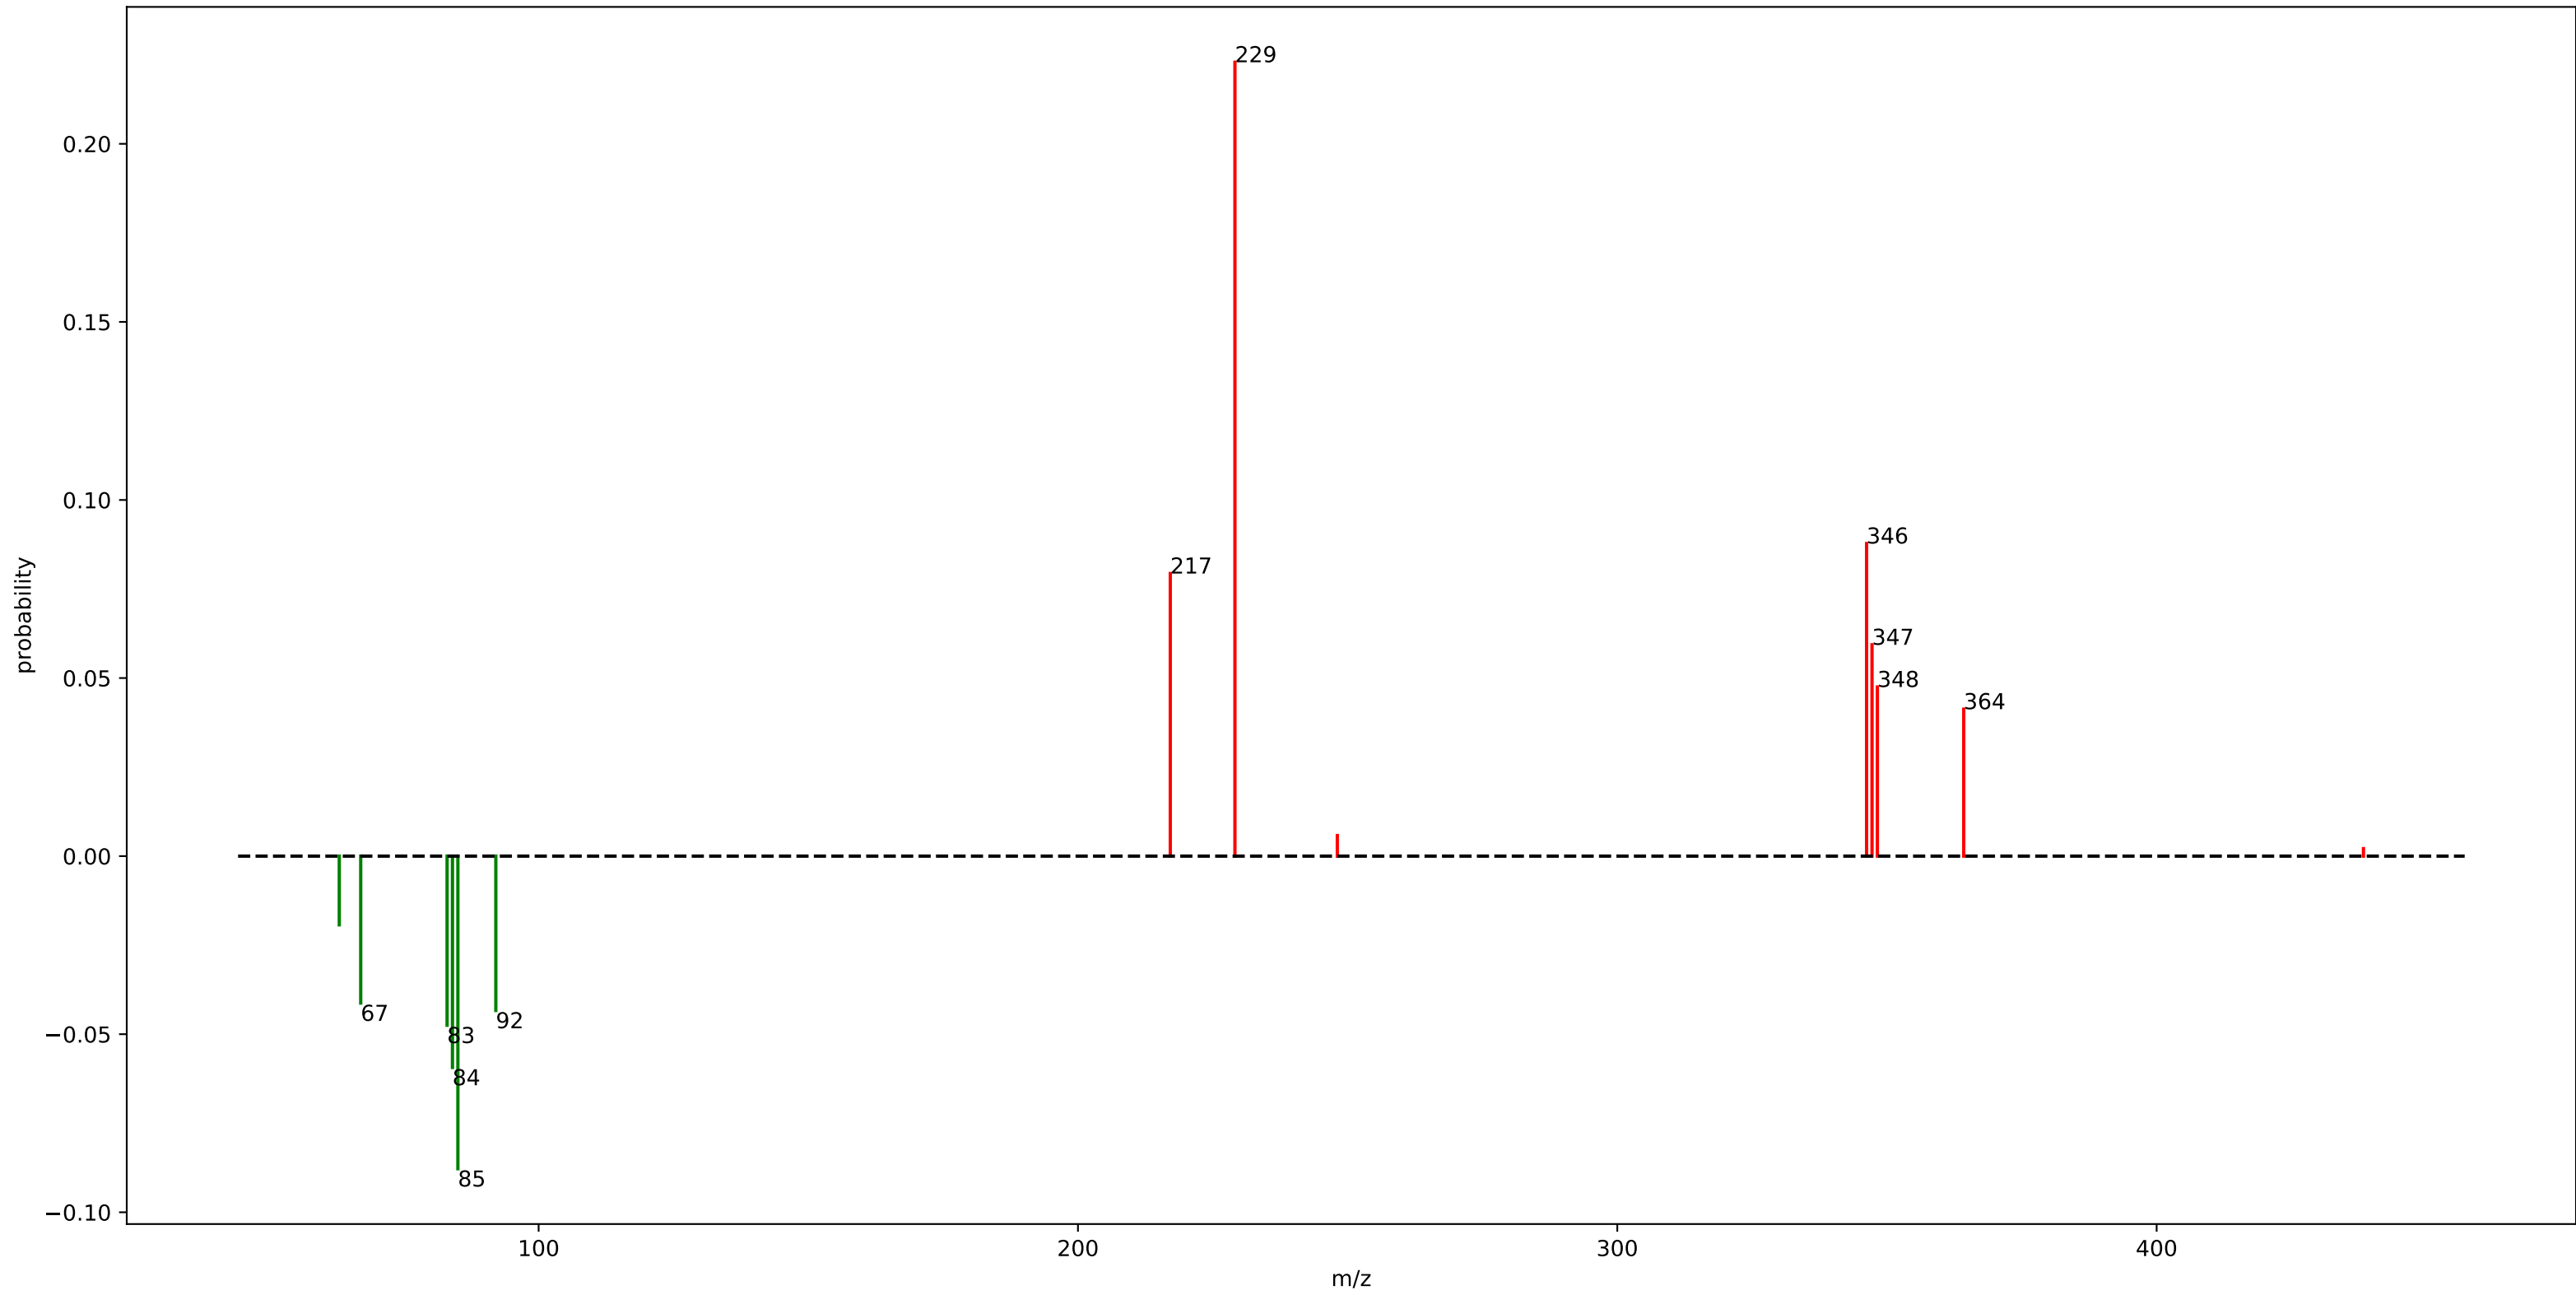

## motif\_627

|                   |        |
|-------------------|--------|
| fragment_229.1025 | : 0.22 |
| loss_85.0275      | : 0.09 |
| fragment_346.2225 | : 0.09 |
| fragment_217.1175 | : 0.08 |
| fragment_347.2275 | : 0.06 |
| loss_84.0225      | : 0.06 |
| fragment_348.2225 | : 0.05 |
| loss_83.0275      | : 0.05 |
| loss_92.0625      | : 0.04 |
| loss_67.0125      | : 0.04 |
| fragment_364.2325 | : 0.04 |
| loss_63.0375      | : 0.02 |
| fragment_248.0875 | : 0.01 |

motif\_626

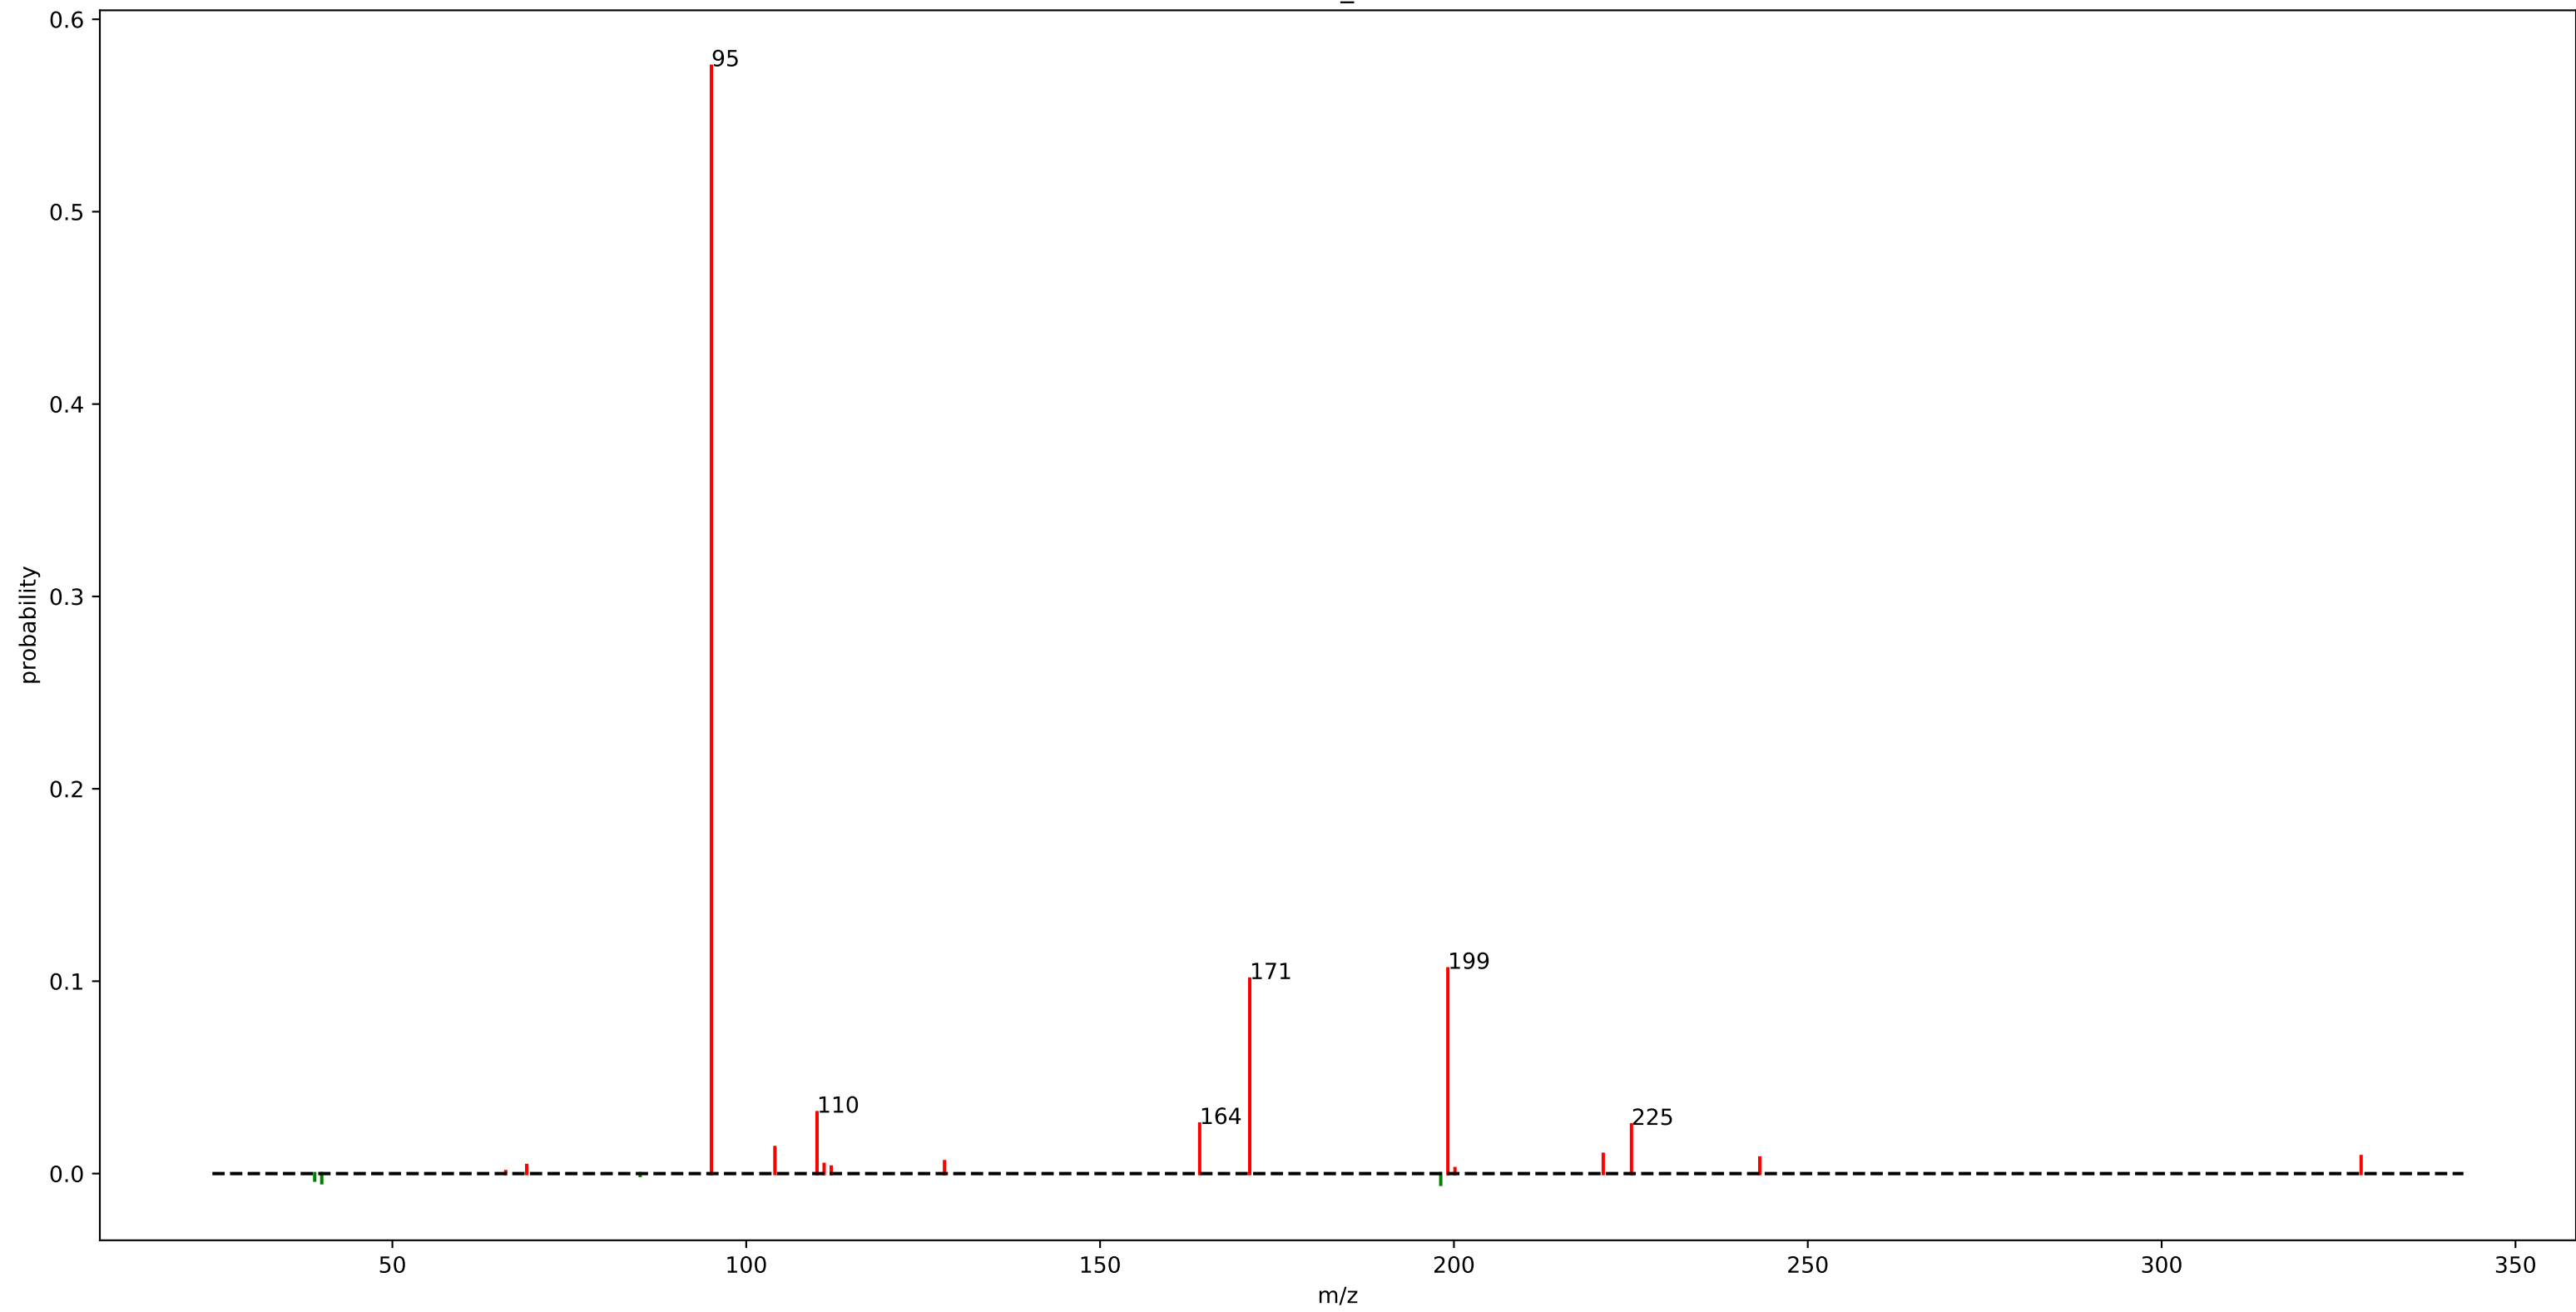

## motif\_626

|                   |        |
|-------------------|--------|
| fragment_95.0825  | : 0.58 |
| fragment_199.1425 | : 0.11 |
| fragment_171.1475 | : 0.10 |
| fragment_110.0075 | : 0.03 |
| fragment_164.0725 | : 0.03 |
| fragment_225.0875 | : 0.03 |
| fragment_104.0525 | : 0.01 |
| fragment_221.0975 | : 0.01 |
| fragment_328.1875 | : 0.01 |
| fragment_243.2125 | : 0.01 |
| fragment_128.0175 | : 0.01 |
| loss_198.1375     | : 0.01 |



motif\_621

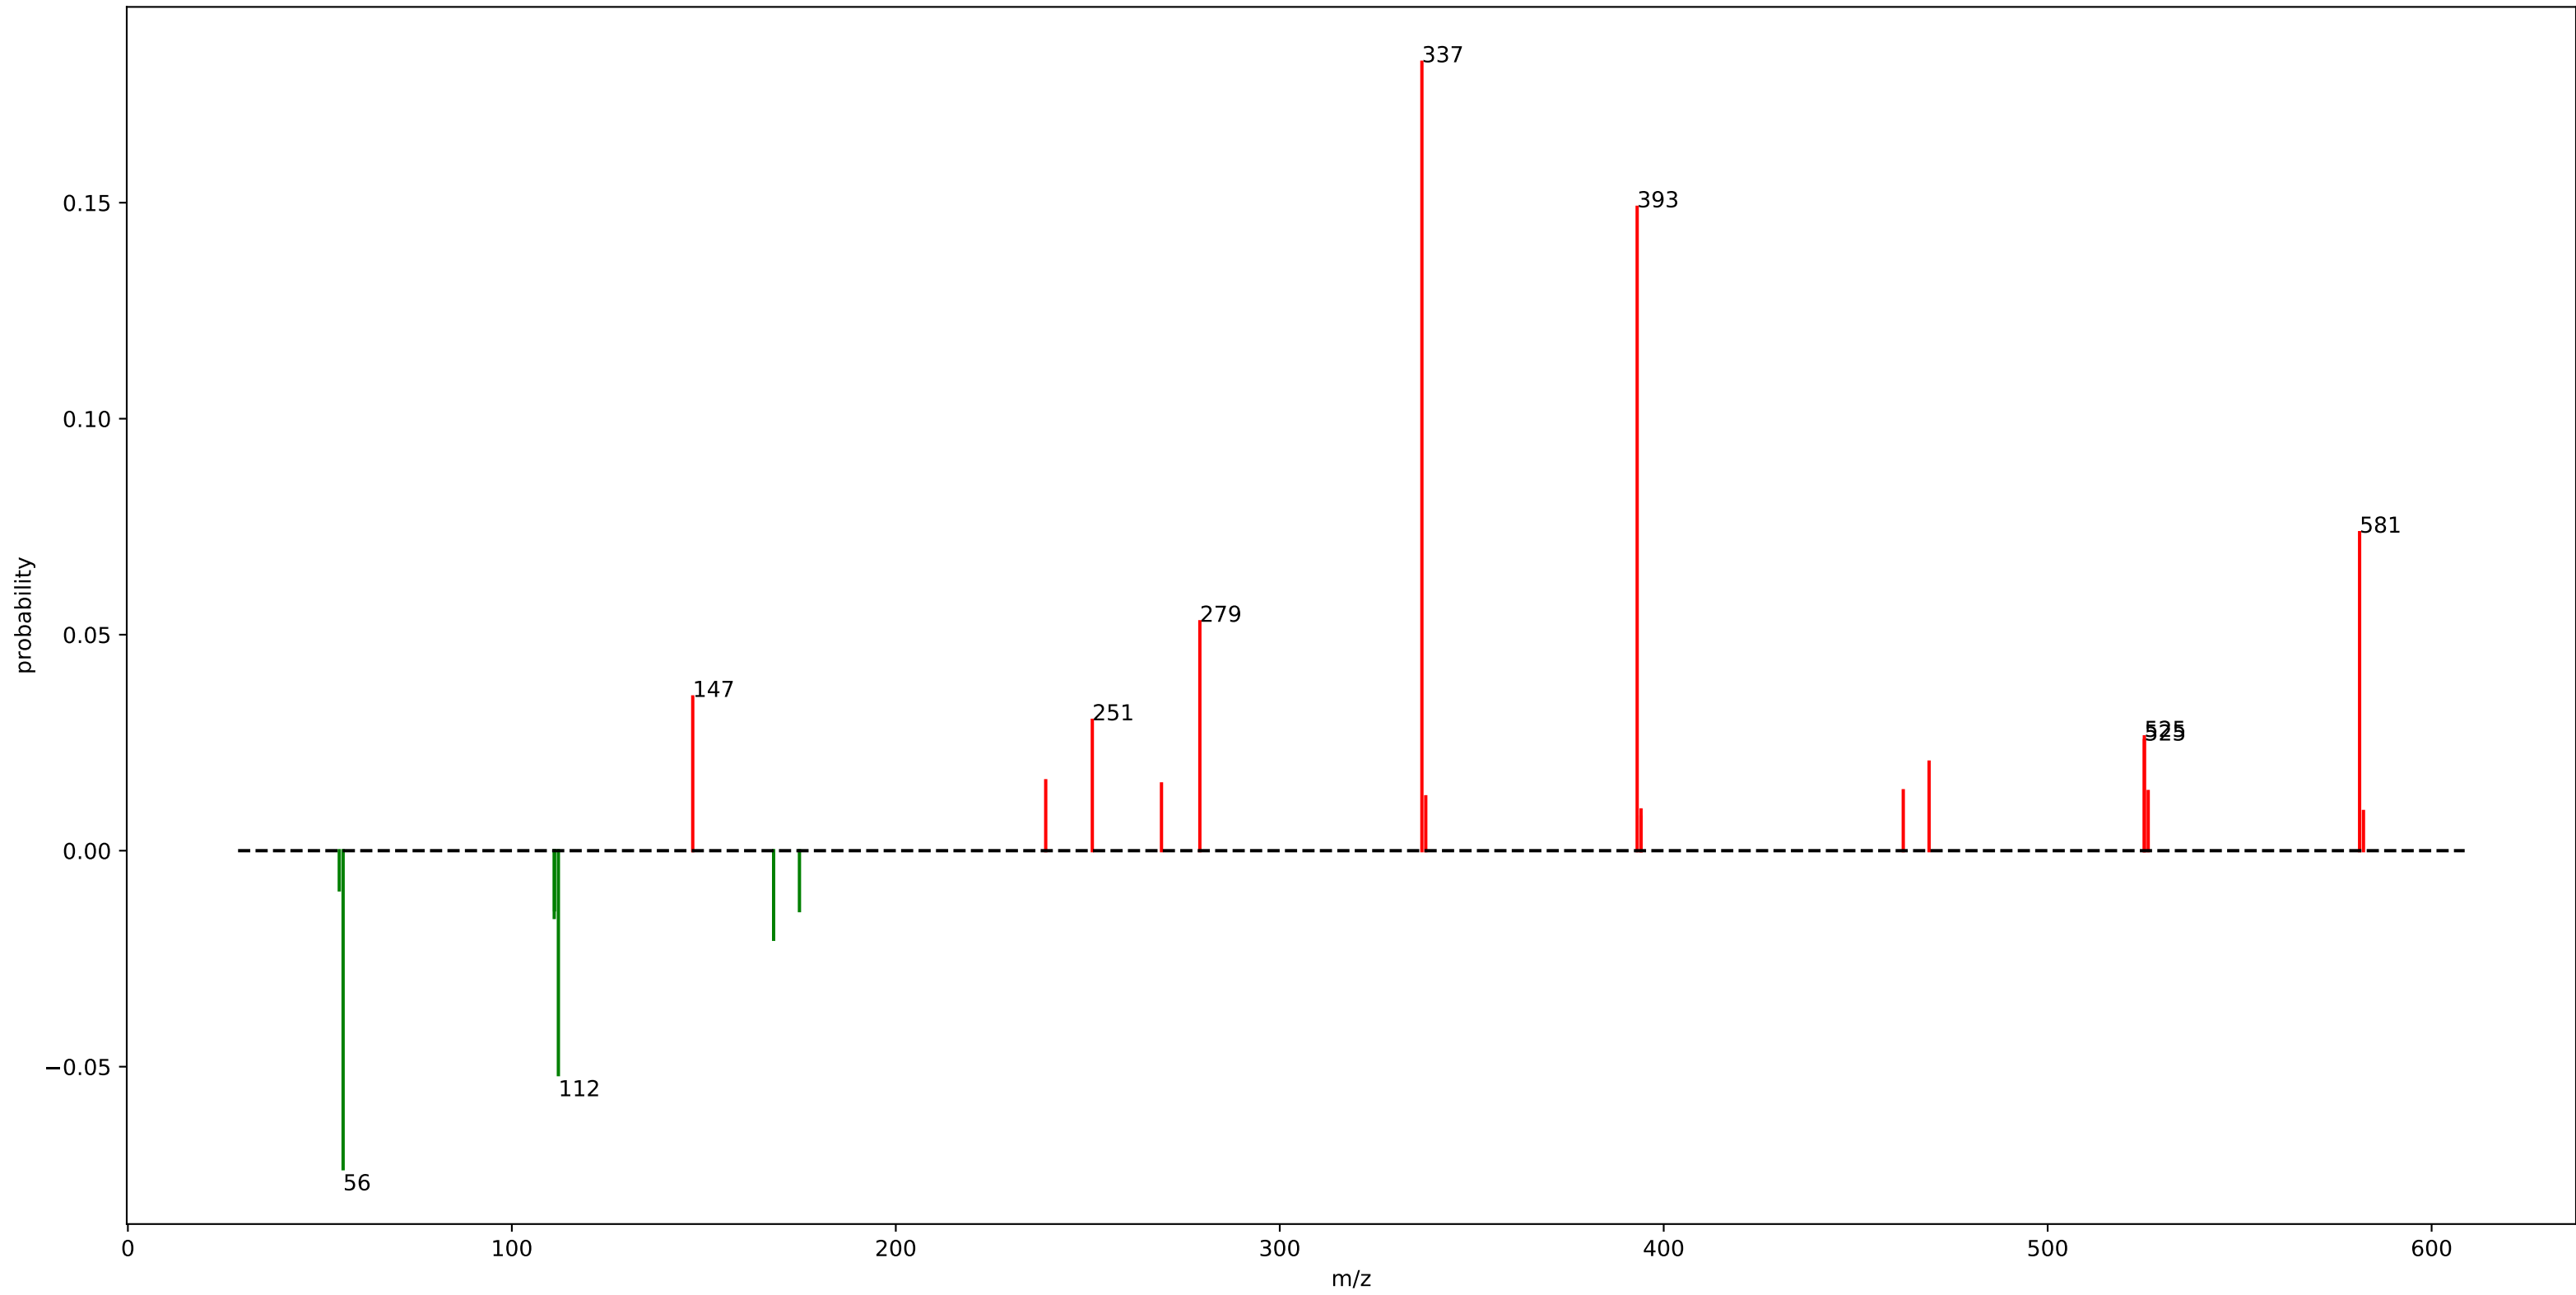

## motif\_621

|                   |        |                   |        |
|-------------------|--------|-------------------|--------|
| fragment_337.0225 | : 0.18 | fragment_394.0925 | : 0.01 |
| fragment_393.0875 | : 0.15 | fragment_582.2475 | : 0.01 |
| fragment_581.2425 | : 0.07 | loss_55.0575      | : 0.01 |
| loss_56.0575      | : 0.07 | fragment_394.0875 | : 0.01 |
| fragment_279.1925 | : 0.05 |                   |        |
| loss_112.1225     | : 0.05 |                   |        |
| fragment_147.1175 | : 0.04 |                   |        |
| fragment_251.1825 | : 0.03 |                   |        |
| fragment_525.1825 | : 0.03 |                   |        |
| fragment_525.1775 | : 0.03 |                   |        |
| fragment_469.1175 | : 0.02 |                   |        |
| loss_168.1825     | : 0.02 |                   |        |
| fragment_239.0475 | : 0.02 |                   |        |
| fragment_269.1975 | : 0.02 |                   |        |
| loss_111.0425     | : 0.02 |                   |        |
| loss_174.9075     | : 0.01 |                   |        |
| fragment_462.3925 | : 0.01 |                   |        |
| loss_111.1175     | : 0.01 |                   |        |
| fragment_526.1825 | : 0.01 |                   |        |
| fragment_338.0275 | : 0.01 |                   |        |

motif\_620

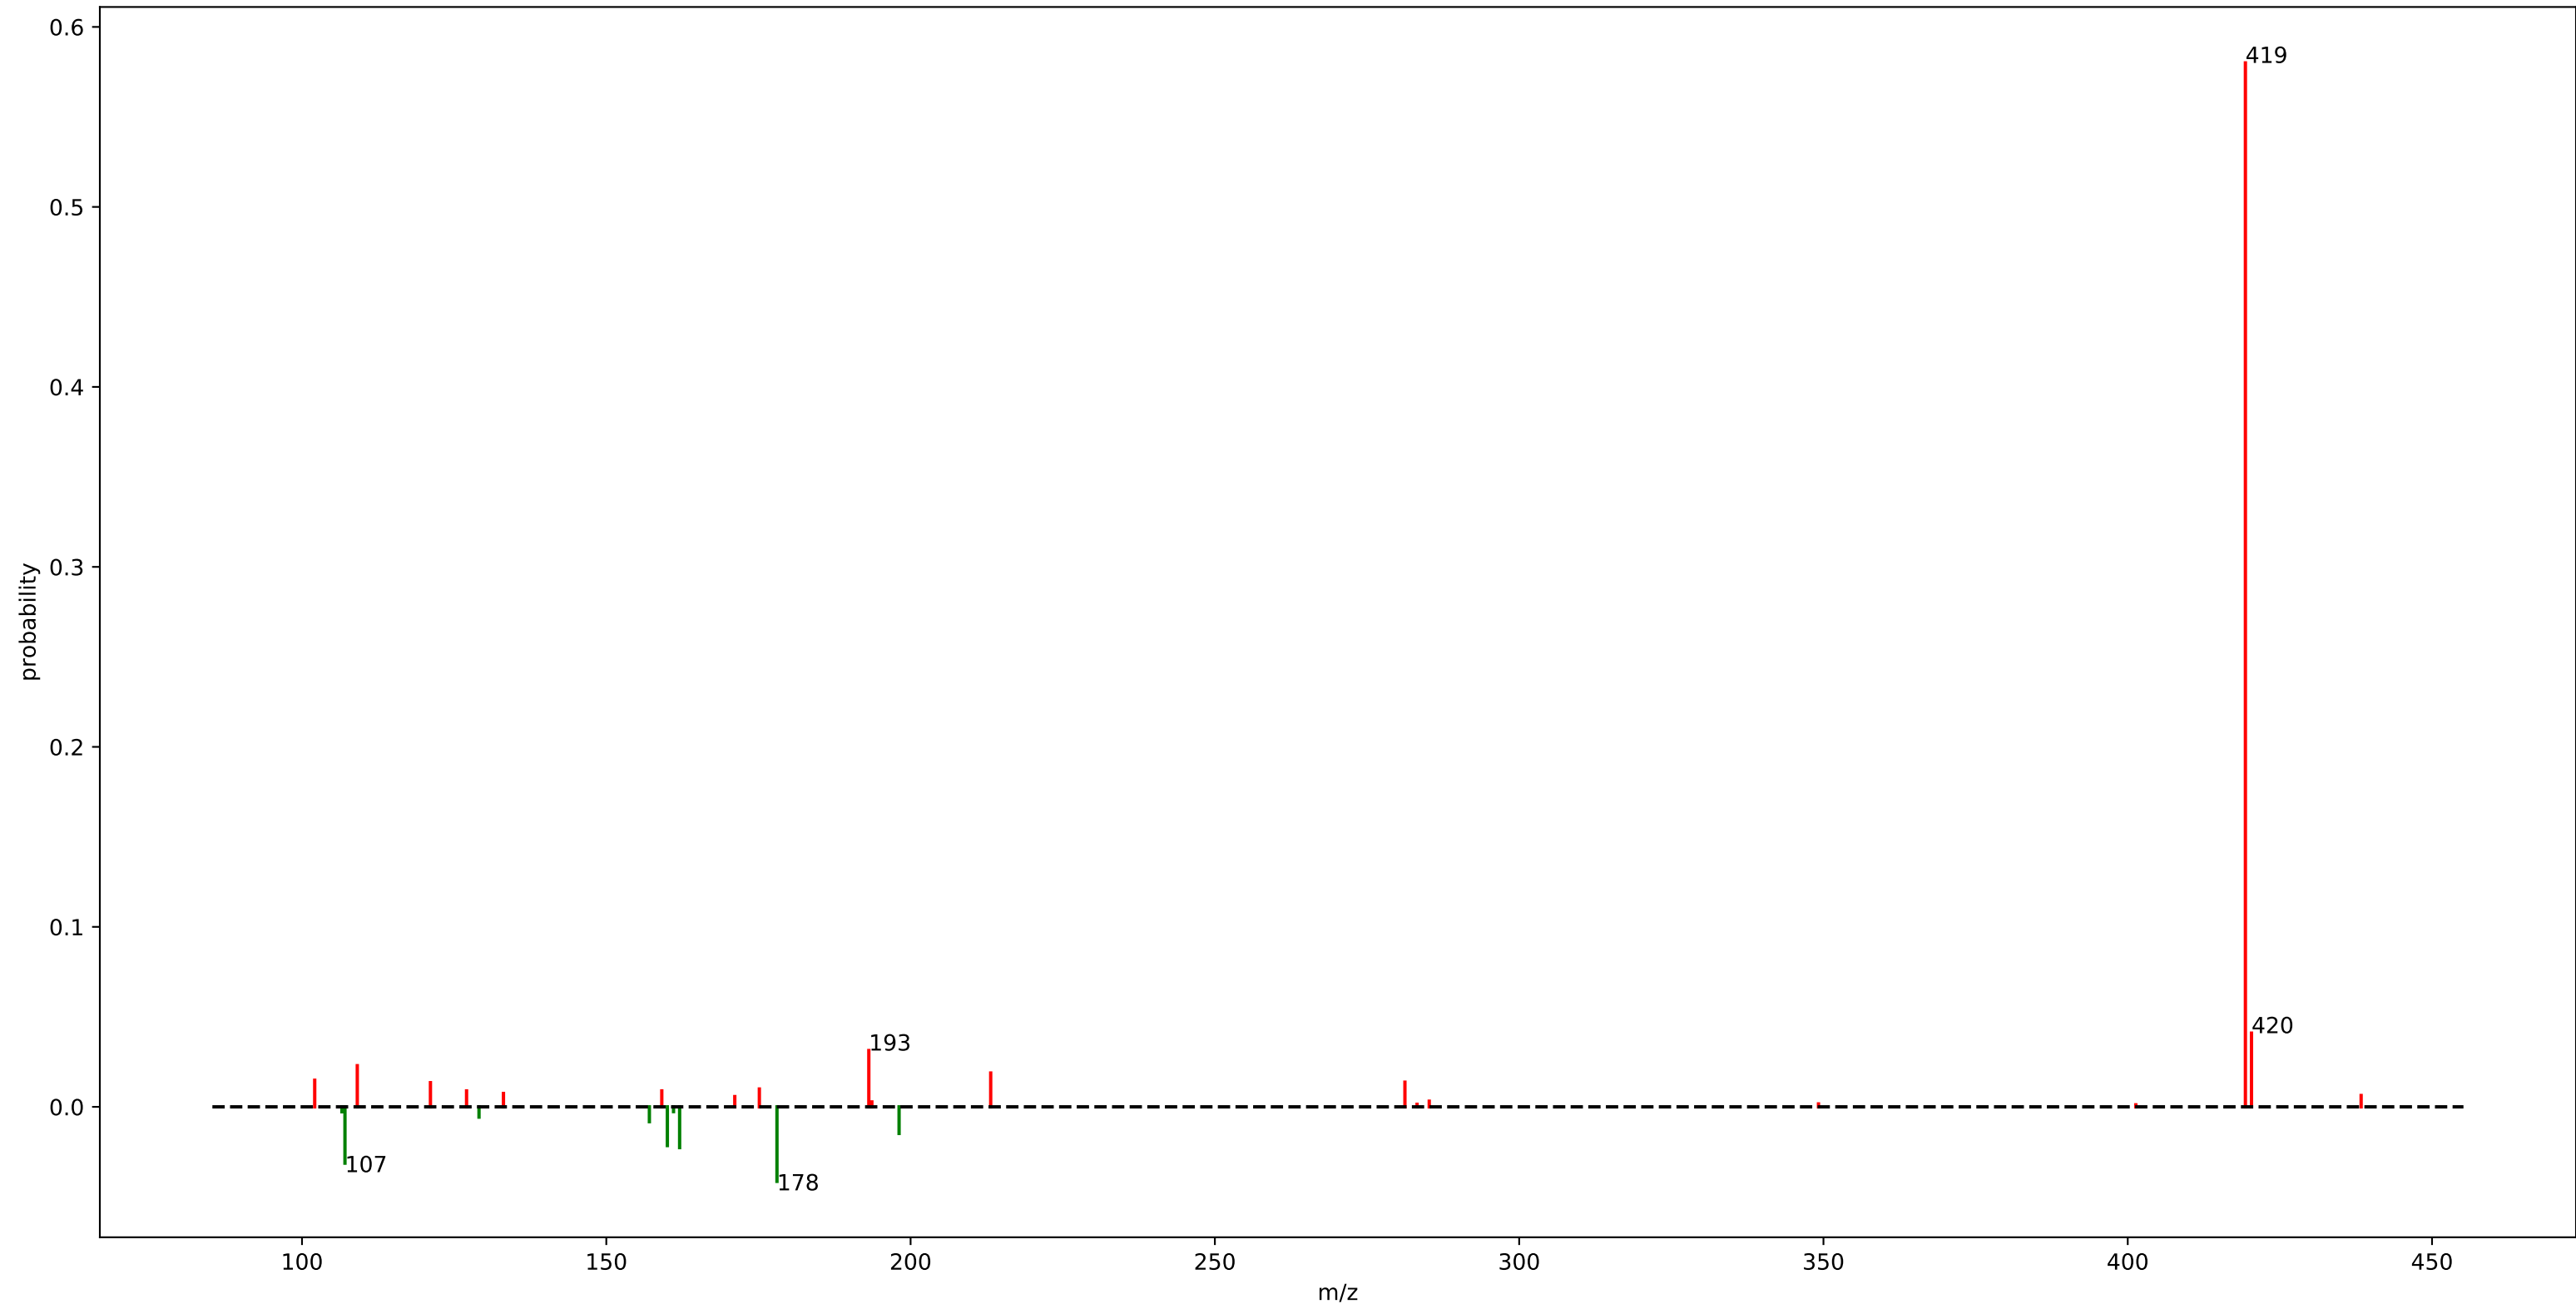

## motif\_620

|                   |        |                   |        |
|-------------------|--------|-------------------|--------|
| fragment_419.3325 | : 0.58 | fragment_171.1125 | : 0.01 |
| loss_178.0425     | : 0.04 |                   |        |
| fragment_420.3325 | : 0.04 |                   |        |
| loss_107.0575     | : 0.03 |                   |        |
| fragment_193.1375 | : 0.03 |                   |        |
| fragment_109.0825 | : 0.02 |                   |        |
| loss_162.0475     | : 0.02 |                   |        |
| loss_160.0325     | : 0.02 |                   |        |
| fragment_213.1625 | : 0.02 |                   |        |
| loss_198.1075     | : 0.01 |                   |        |
| fragment_102.0875 | : 0.01 |                   |        |
| fragment_281.2275 | : 0.01 |                   |        |
| fragment_121.1025 | : 0.01 |                   |        |
| fragment_175.1475 | : 0.01 |                   |        |
| fragment_159.1175 | : 0.01 |                   |        |
| fragment_127.0375 | : 0.01 |                   |        |
| loss_157.0775     | : 0.01 |                   |        |
| fragment_133.1025 | : 0.01 |                   |        |
| fragment_438.3475 | : 0.01 |                   |        |
| loss_129.0825     | : 0.01 |                   |        |

motif\_623

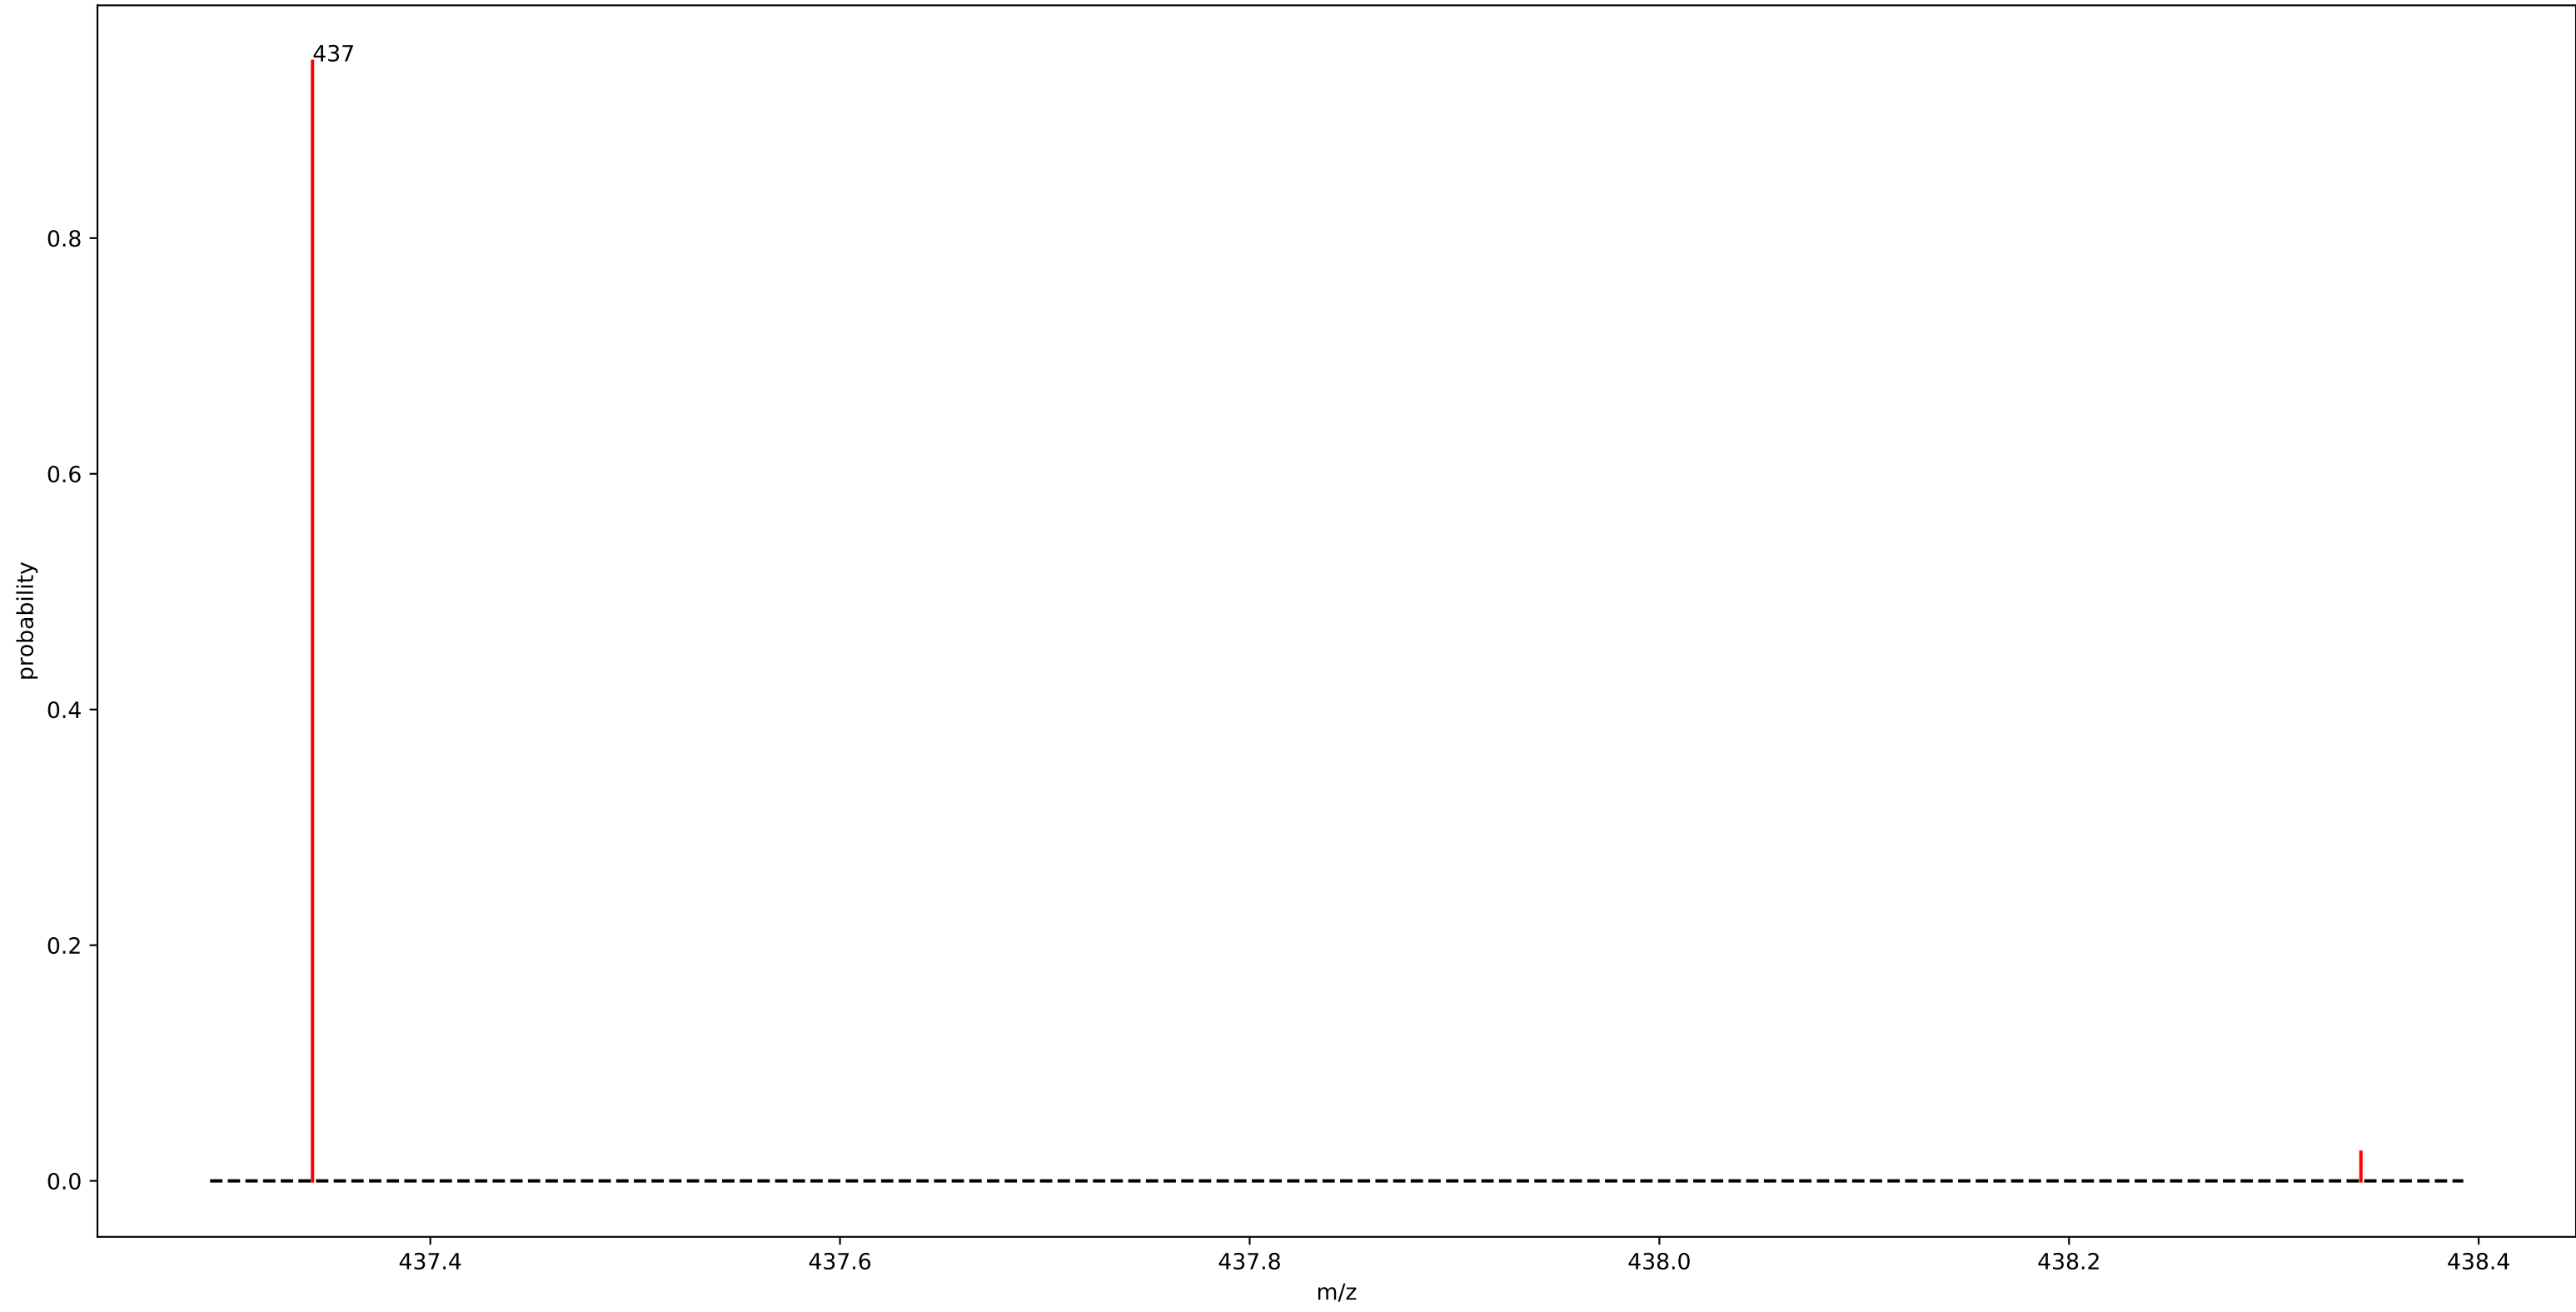

## motif\_623

fragment\_437.3425 : 0.95  
fragment\_438.3425 : 0.02

motif\_622

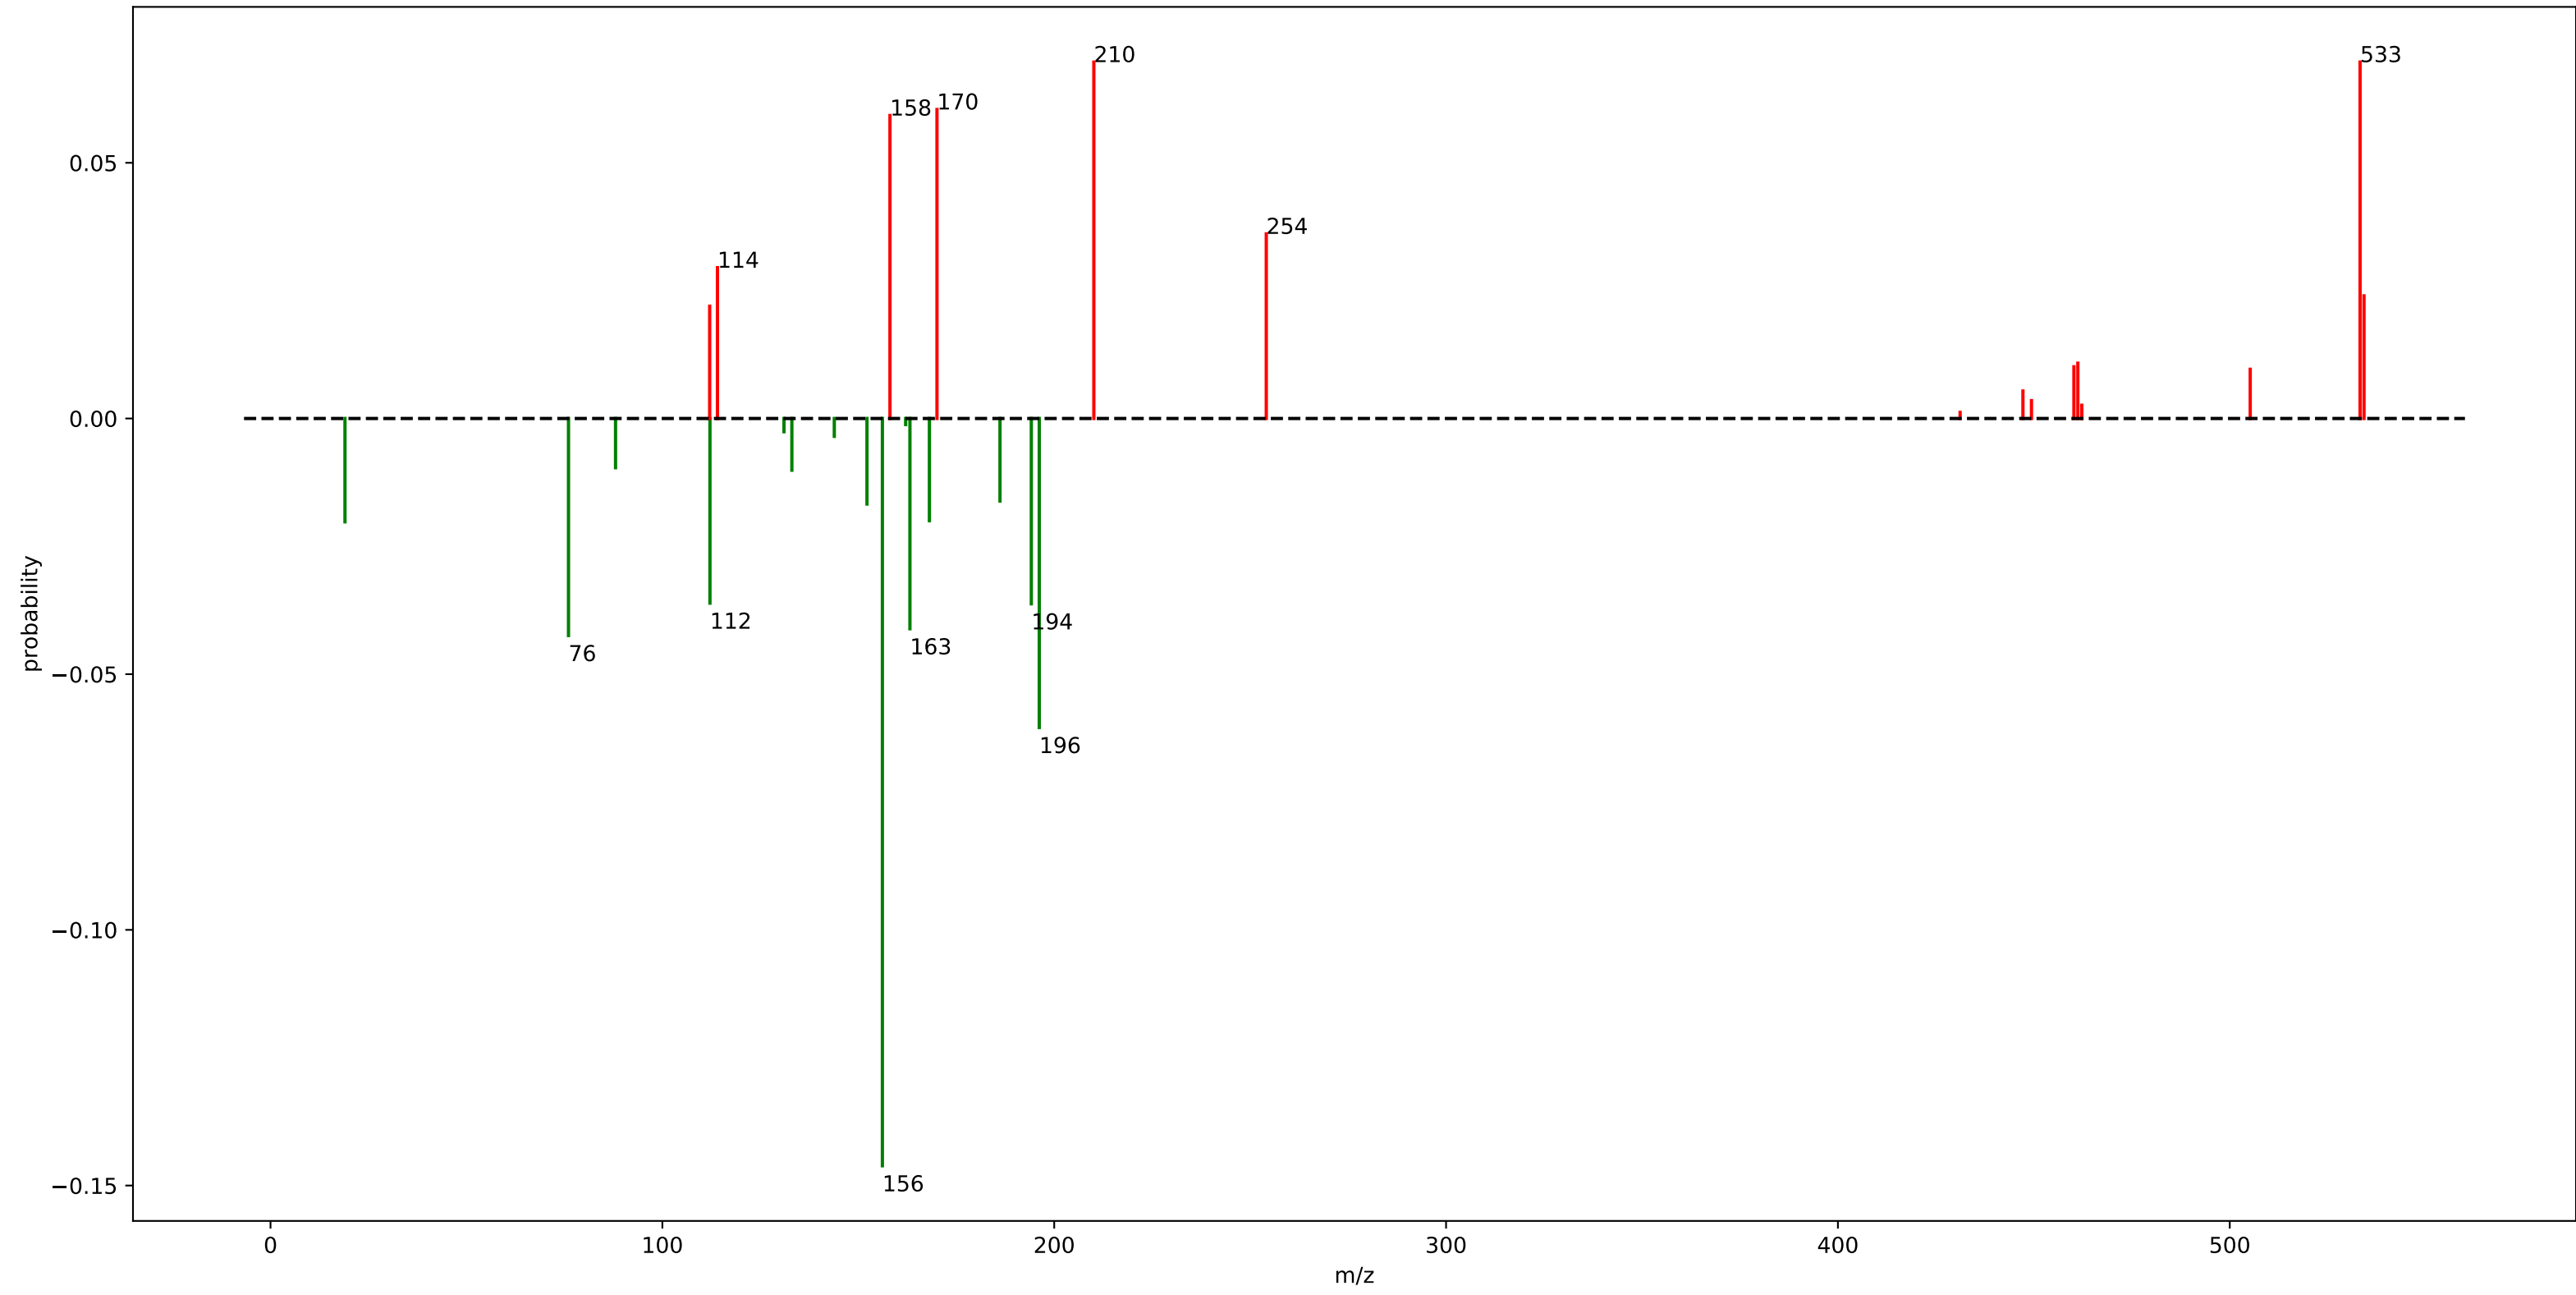

## motif\_622

|                   |        |                   |        |
|-------------------|--------|-------------------|--------|
| loss_156.1475     | : 0.15 | loss_133.0475     | : 0.01 |
| fragment_210.1125 | : 0.07 | fragment_505.2225 | : 0.01 |
| fragment_533.2575 | : 0.07 | loss_88.0475      | : 0.01 |
| fragment_170.0825 | : 0.06 | fragment_447.2175 | : 0.01 |
| loss_196.1825     | : 0.06 |                   |        |
| fragment_158.0825 | : 0.06 |                   |        |
| loss_76.0425      | : 0.04 |                   |        |
| loss_163.1775     | : 0.04 |                   |        |
| loss_194.1575     | : 0.04 |                   |        |
| loss_112.1425     | : 0.04 |                   |        |
| fragment_254.1175 | : 0.04 |                   |        |
| fragment_114.0575 | : 0.03 |                   |        |
| fragment_534.2575 | : 0.02 |                   |        |
| fragment_112.0725 | : 0.02 |                   |        |
| loss_19.0025      | : 0.02 |                   |        |
| loss_168.1475     | : 0.02 |                   |        |
| loss_152.2175     | : 0.02 |                   |        |
| loss_186.1625     | : 0.02 |                   |        |
| fragment_461.2325 | : 0.01 |                   |        |
| fragment_460.2275 | : 0.01 |                   |        |



urine\_mass2motif\_202.m2m

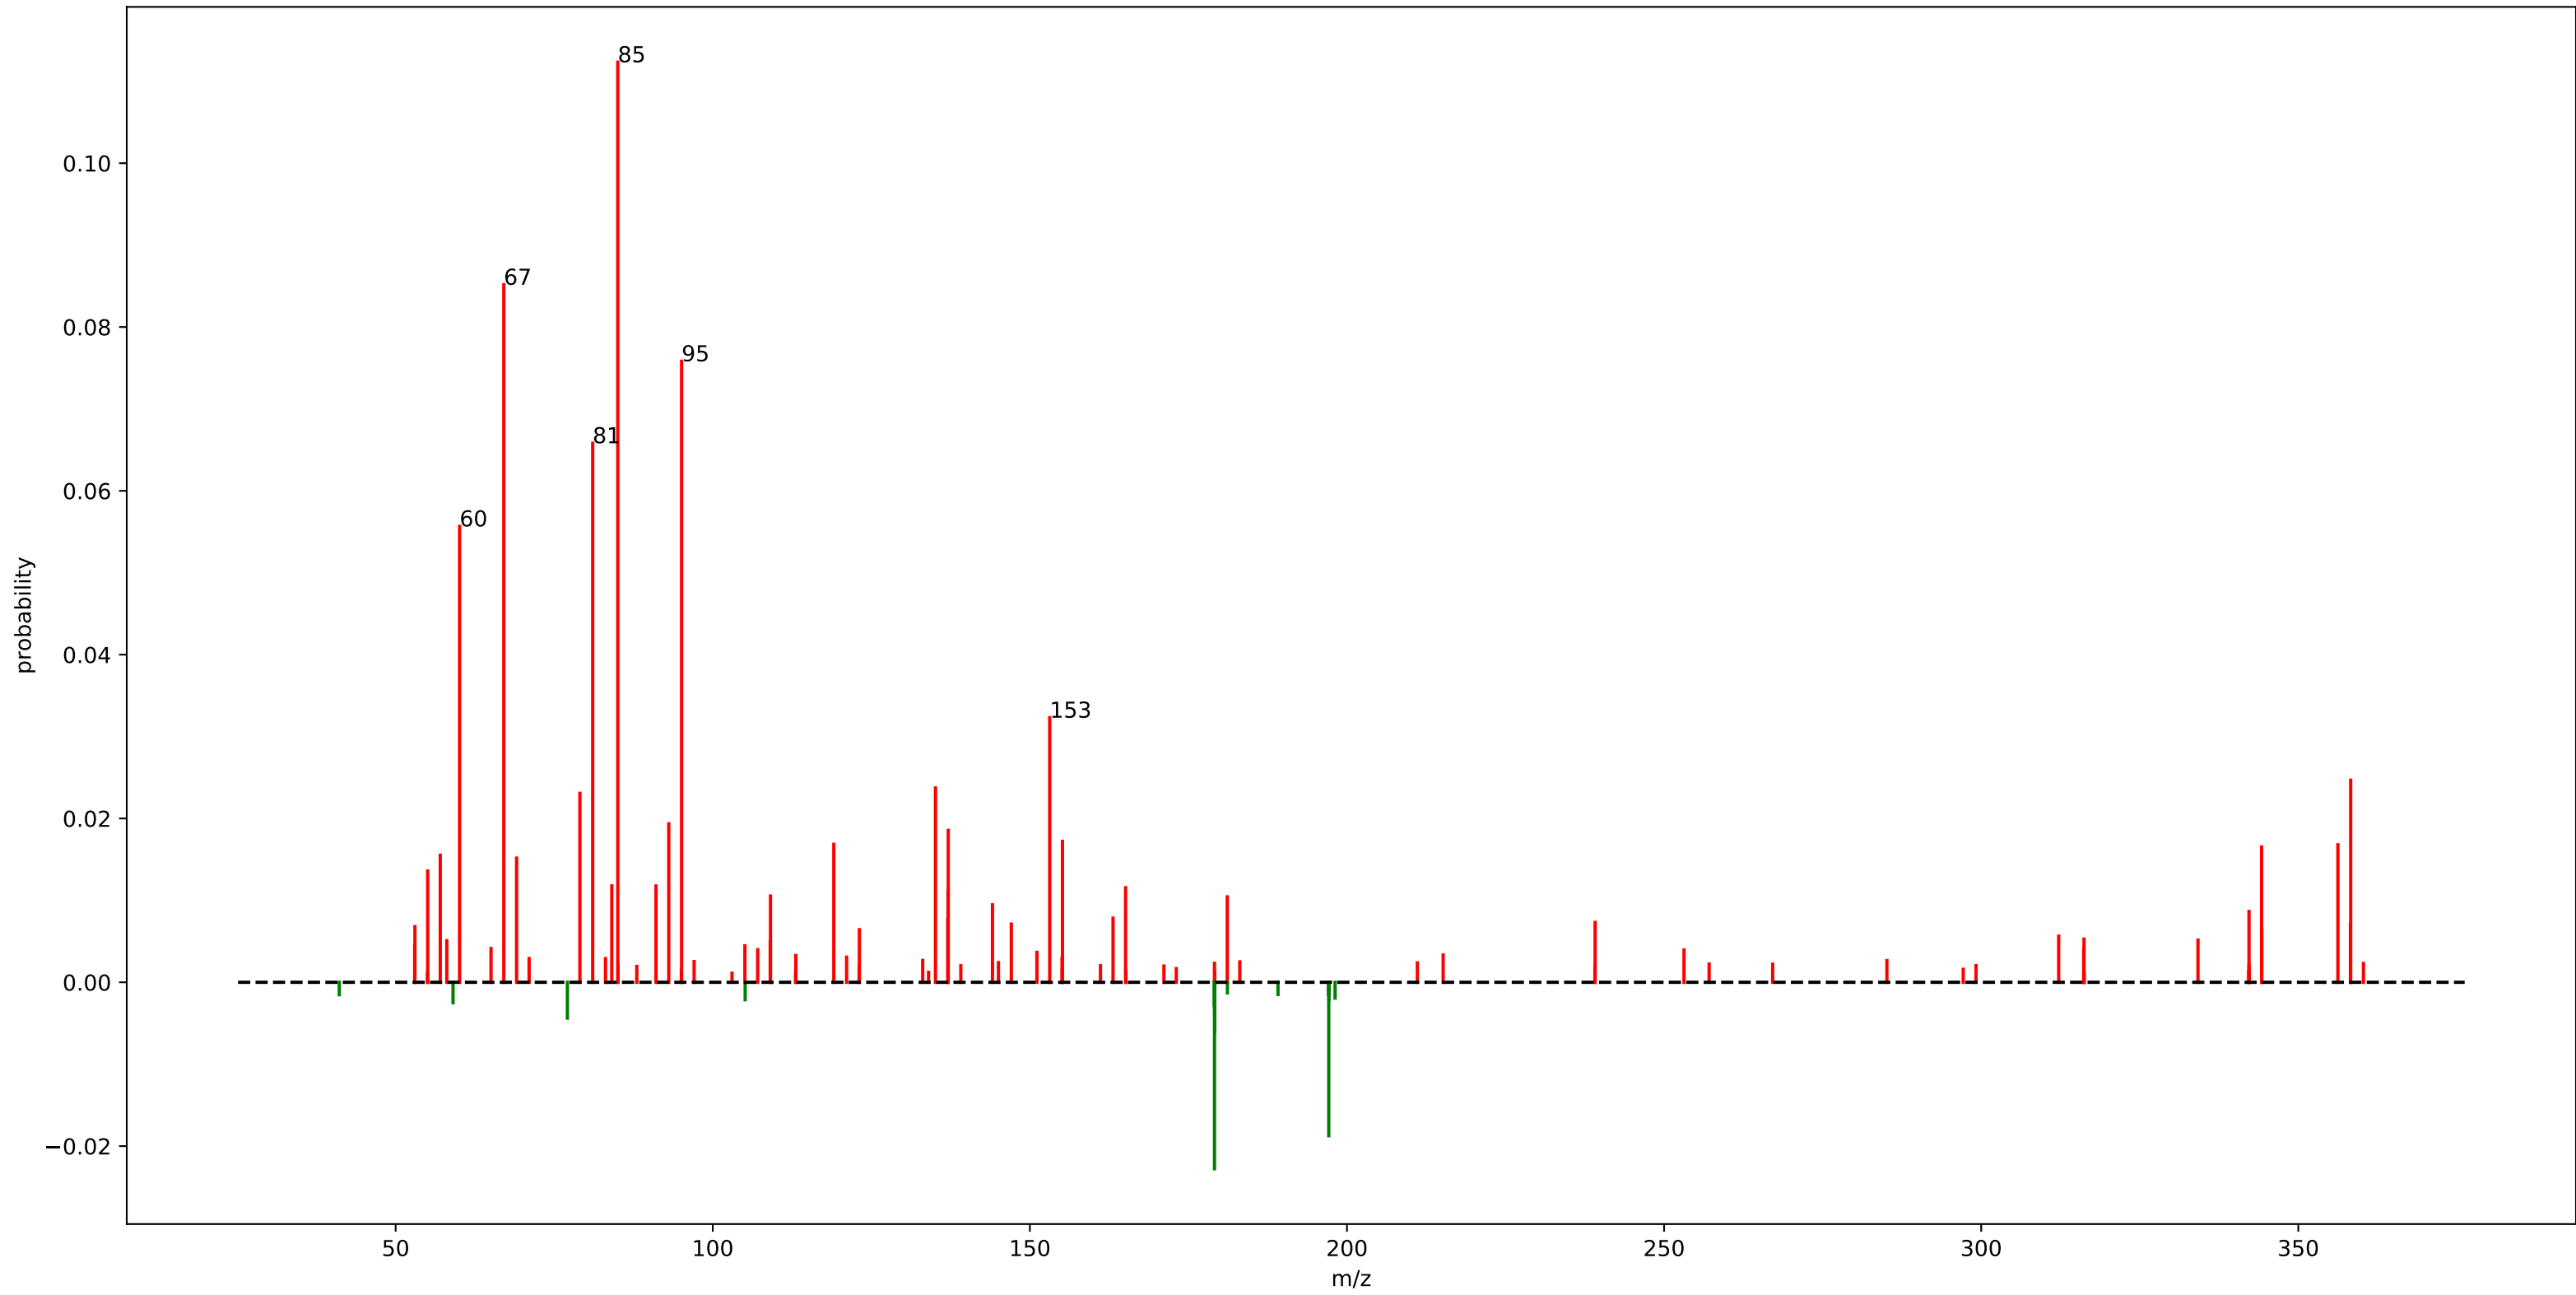

# urine\_mass2motif\_202.m2m

|                   |        |                   |        |                  |        |
|-------------------|--------|-------------------|--------|------------------|--------|
| fragment_85.0275  | : 0.11 | fragment_84.0825  | : 0.01 | fragment_58.0675 | : 0.01 |
| fragment_67.0525  | : 0.09 | fragment_91.0525  | : 0.01 |                  |        |
| fragment_95.0875  | : 0.08 | fragment_165.0925 | : 0.01 |                  |        |
| fragment_81.0675  | : 0.07 | fragment_137.0975 | : 0.01 |                  |        |
| fragment_60.0825  | : 0.06 | fragment_109.1025 | : 0.01 |                  |        |
| fragment_153.1275 | : 0.03 | fragment_181.1225 | : 0.01 |                  |        |
| fragment_358.2575 | : 0.02 | fragment_144.1025 | : 0.01 |                  |        |
| fragment_135.1175 | : 0.02 | fragment_342.2275 | : 0.01 |                  |        |
| fragment_79.0525  | : 0.02 | fragment_163.1125 | : 0.01 |                  |        |
| loss_179.1125     | : 0.02 | fragment_137.0575 | : 0.01 |                  |        |
| fragment_93.0675  | : 0.02 | fragment_239.1275 | : 0.01 |                  |        |
| loss_197.1275     | : 0.02 | fragment_147.0775 | : 0.01 |                  |        |
| fragment_137.1325 | : 0.02 | fragment_358.2175 | : 0.01 |                  |        |
| fragment_155.1425 | : 0.02 | fragment_53.0375  | : 0.01 |                  |        |
| fragment_119.0875 | : 0.02 | fragment_123.1175 | : 0.01 |                  |        |
| fragment_356.2425 | : 0.02 | fragment_344.2425 | : 0.01 |                  |        |
| fragment_344.2075 | : 0.02 | loss_179.1525     | : 0.01 |                  |        |
| fragment_57.0325  | : 0.02 | fragment_312.2175 | : 0.01 |                  |        |
| fragment_69.0725  | : 0.02 | fragment_316.2125 | : 0.01 |                  |        |
| fragment_55.0525  | : 0.01 | fragment_334.1825 | : 0.01 |                  |        |

motif\_629

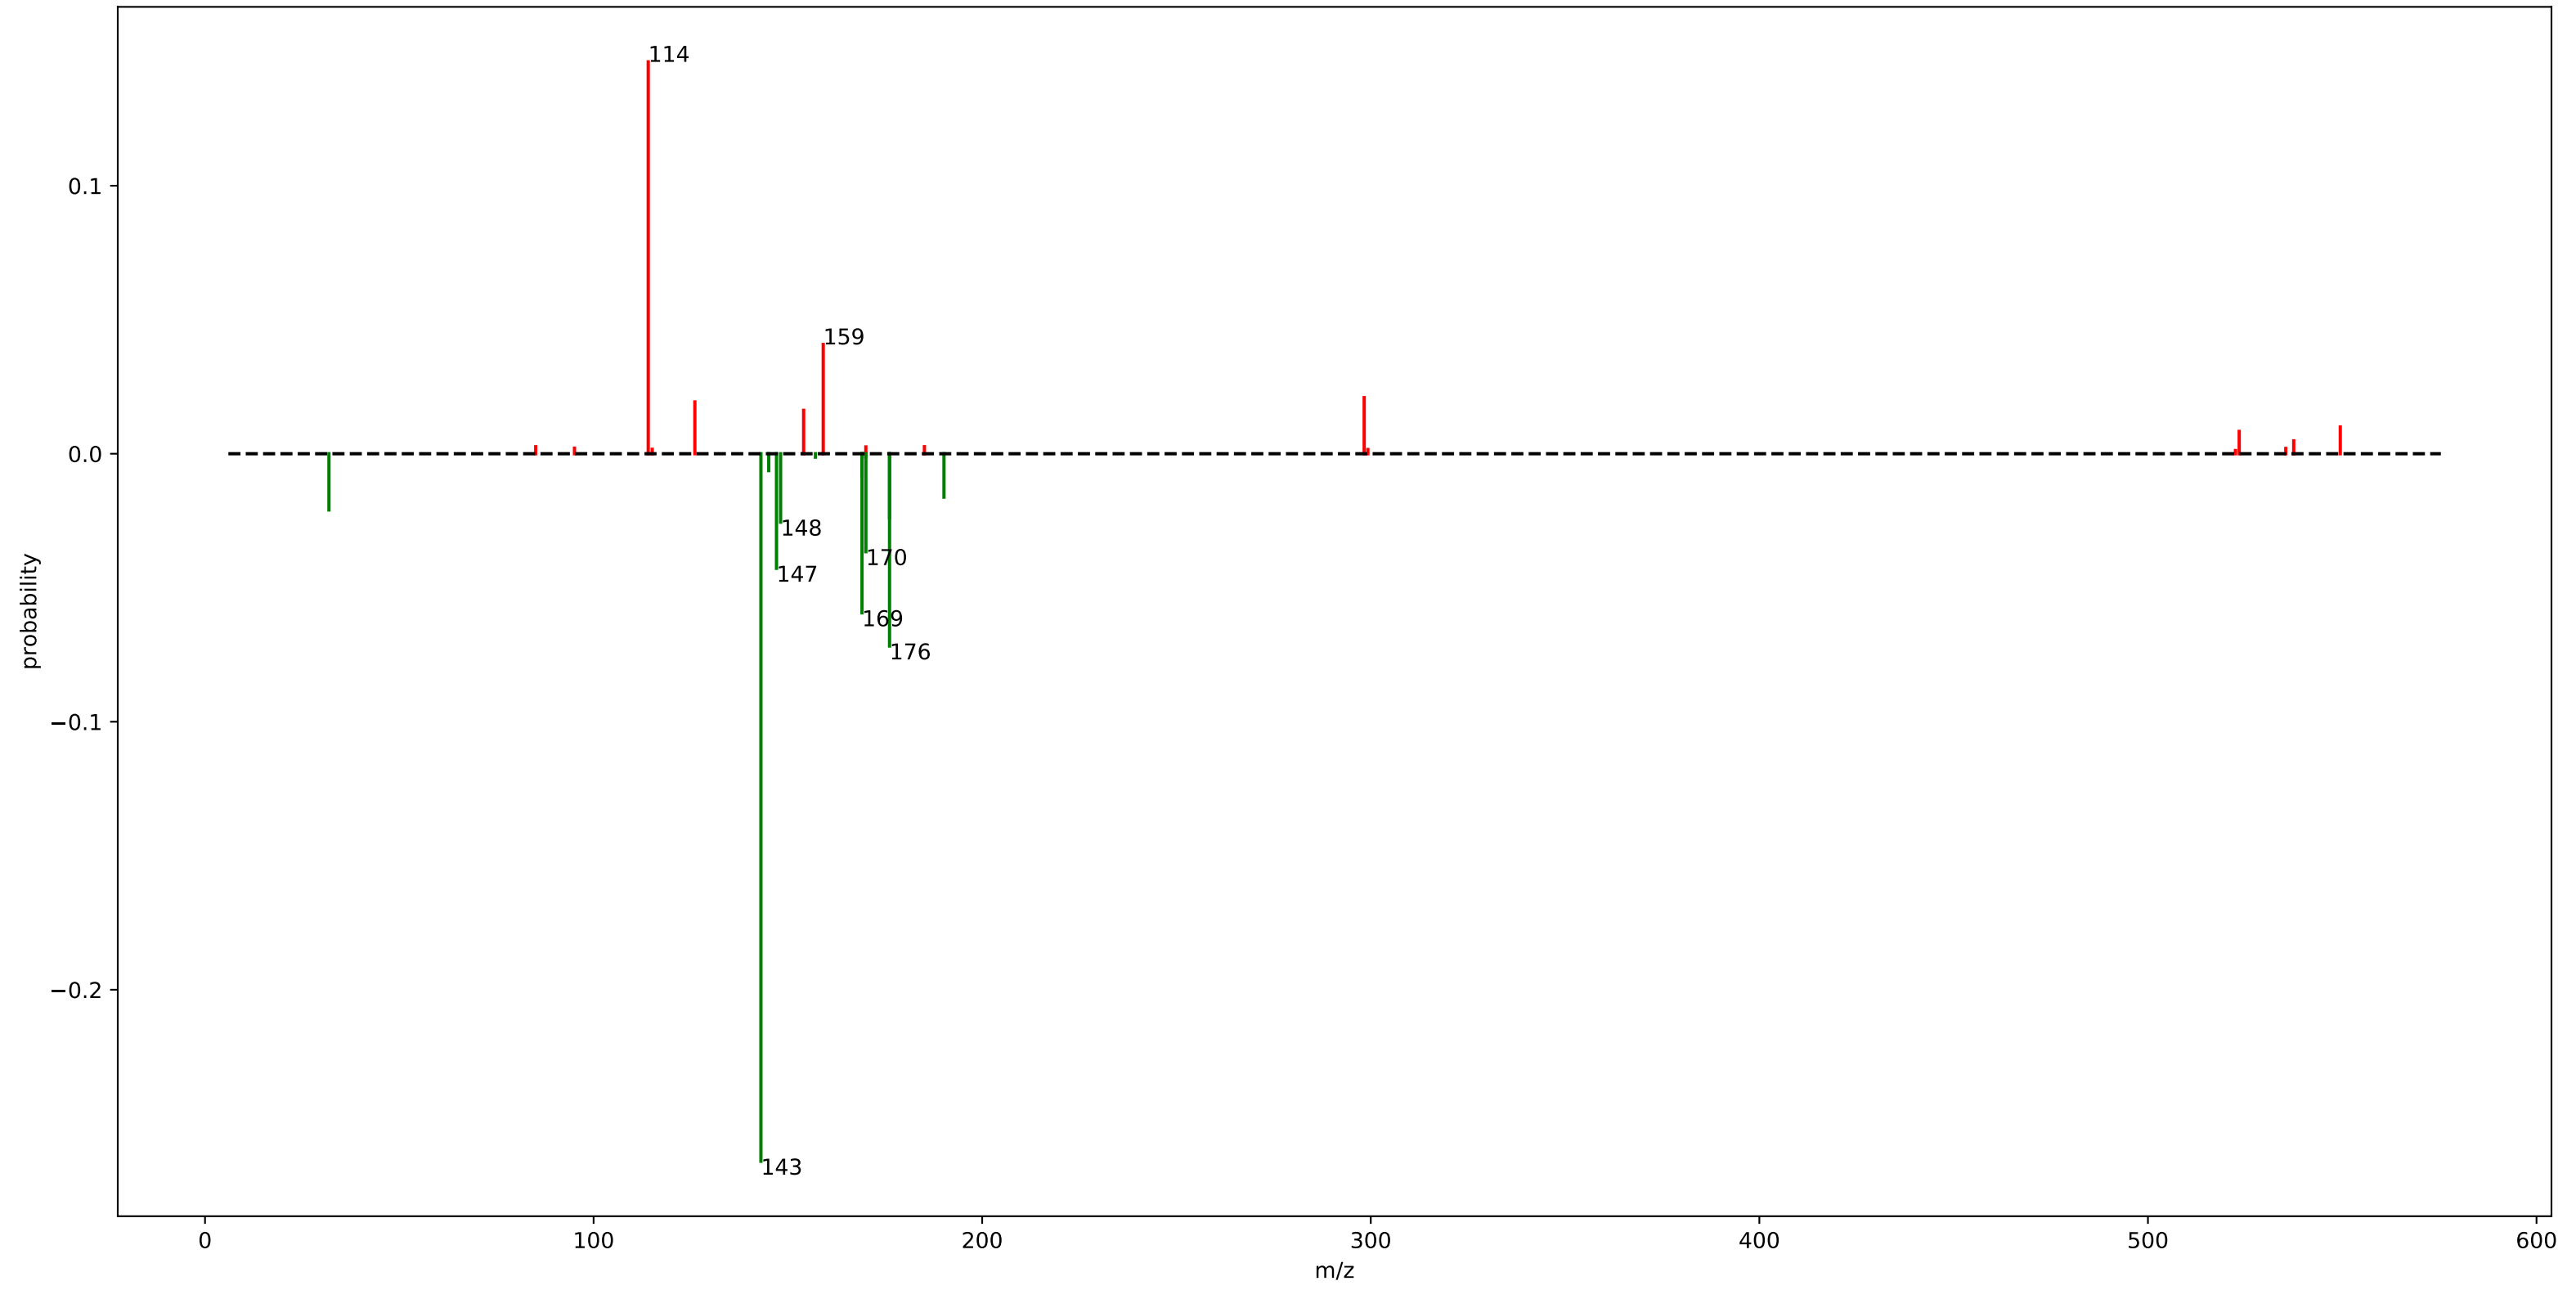

## motif\_629

|                   |        |
|-------------------|--------|
| loss_143.0575     | : 0.26 |
| fragment_114.0575 | : 0.15 |
| loss_176.1575     | : 0.07 |
| loss_169.0725     | : 0.06 |
| loss_147.0675     | : 0.04 |
| fragment_159.0925 | : 0.04 |
| loss_170.0675     | : 0.04 |
| loss_148.1225     | : 0.03 |
| loss_176.1525     | : 0.02 |
| loss_31.8925      | : 0.02 |
| fragment_298.3075 | : 0.02 |
| fragment_126.0575 | : 0.02 |
| loss_190.1675     | : 0.02 |
| fragment_154.0525 | : 0.02 |
| fragment_549.4975 | : 0.01 |
| fragment_523.4875 | : 0.01 |
| loss_169.0675     | : 0.01 |
| loss_145.0725     | : 0.01 |

motif\_628

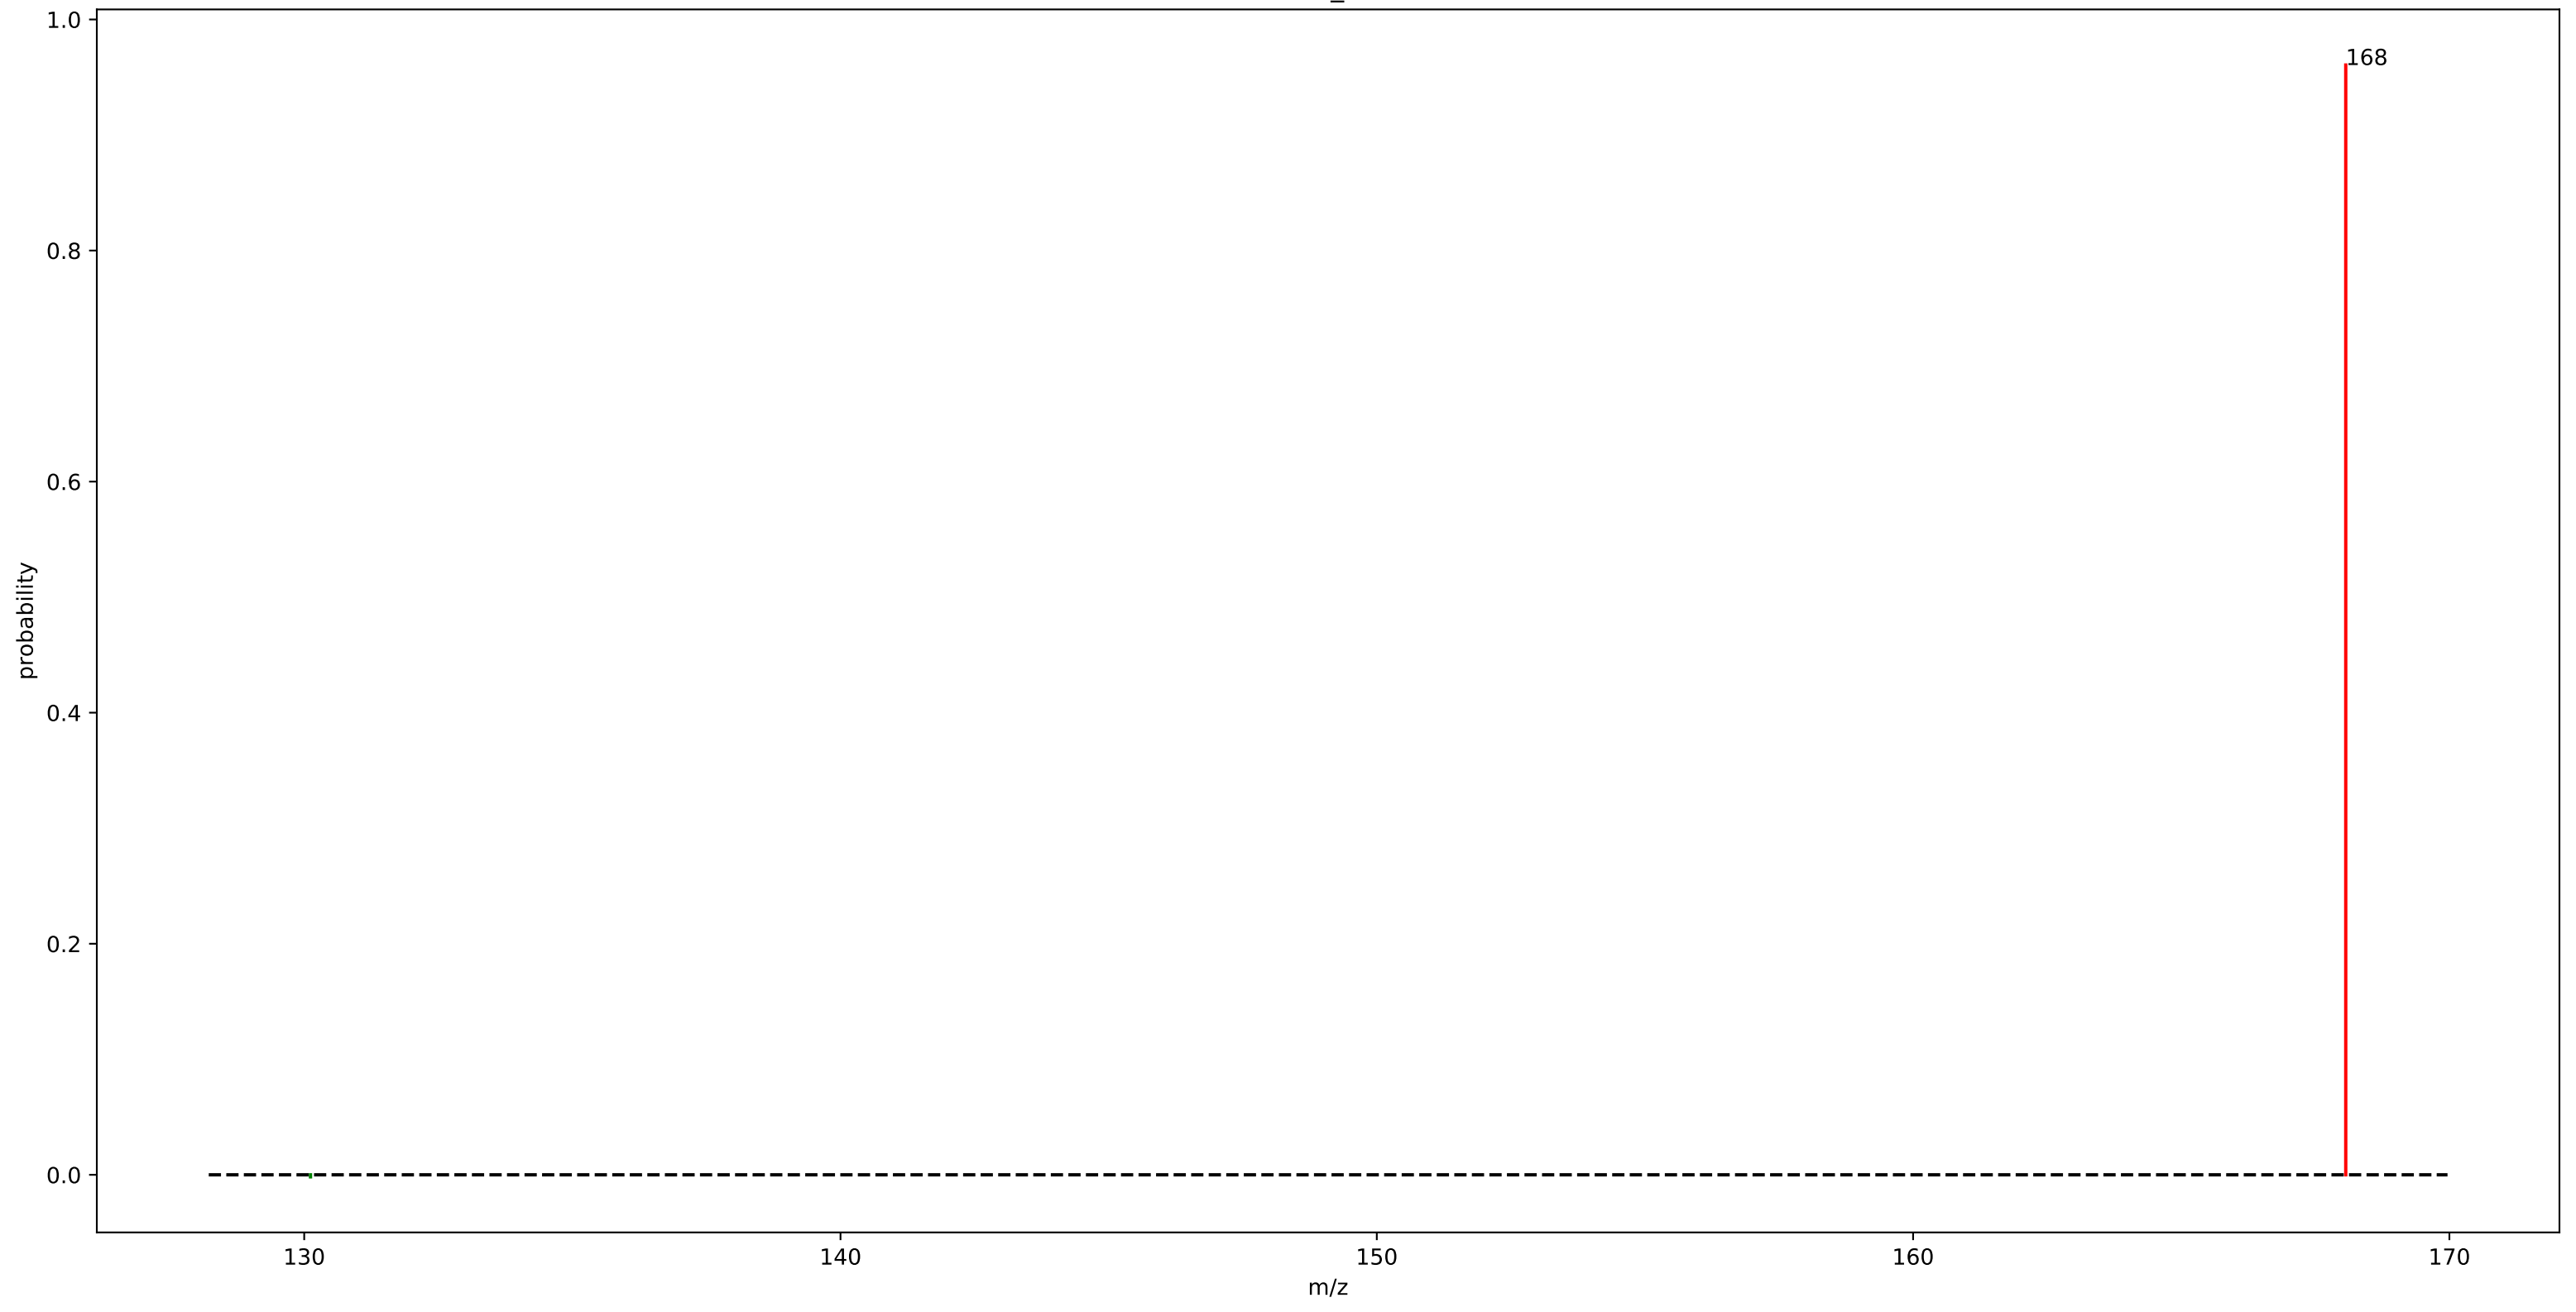

# motif\_628

fragment\_168.0675 : 0.96

gnps\_motif\_8.m2m

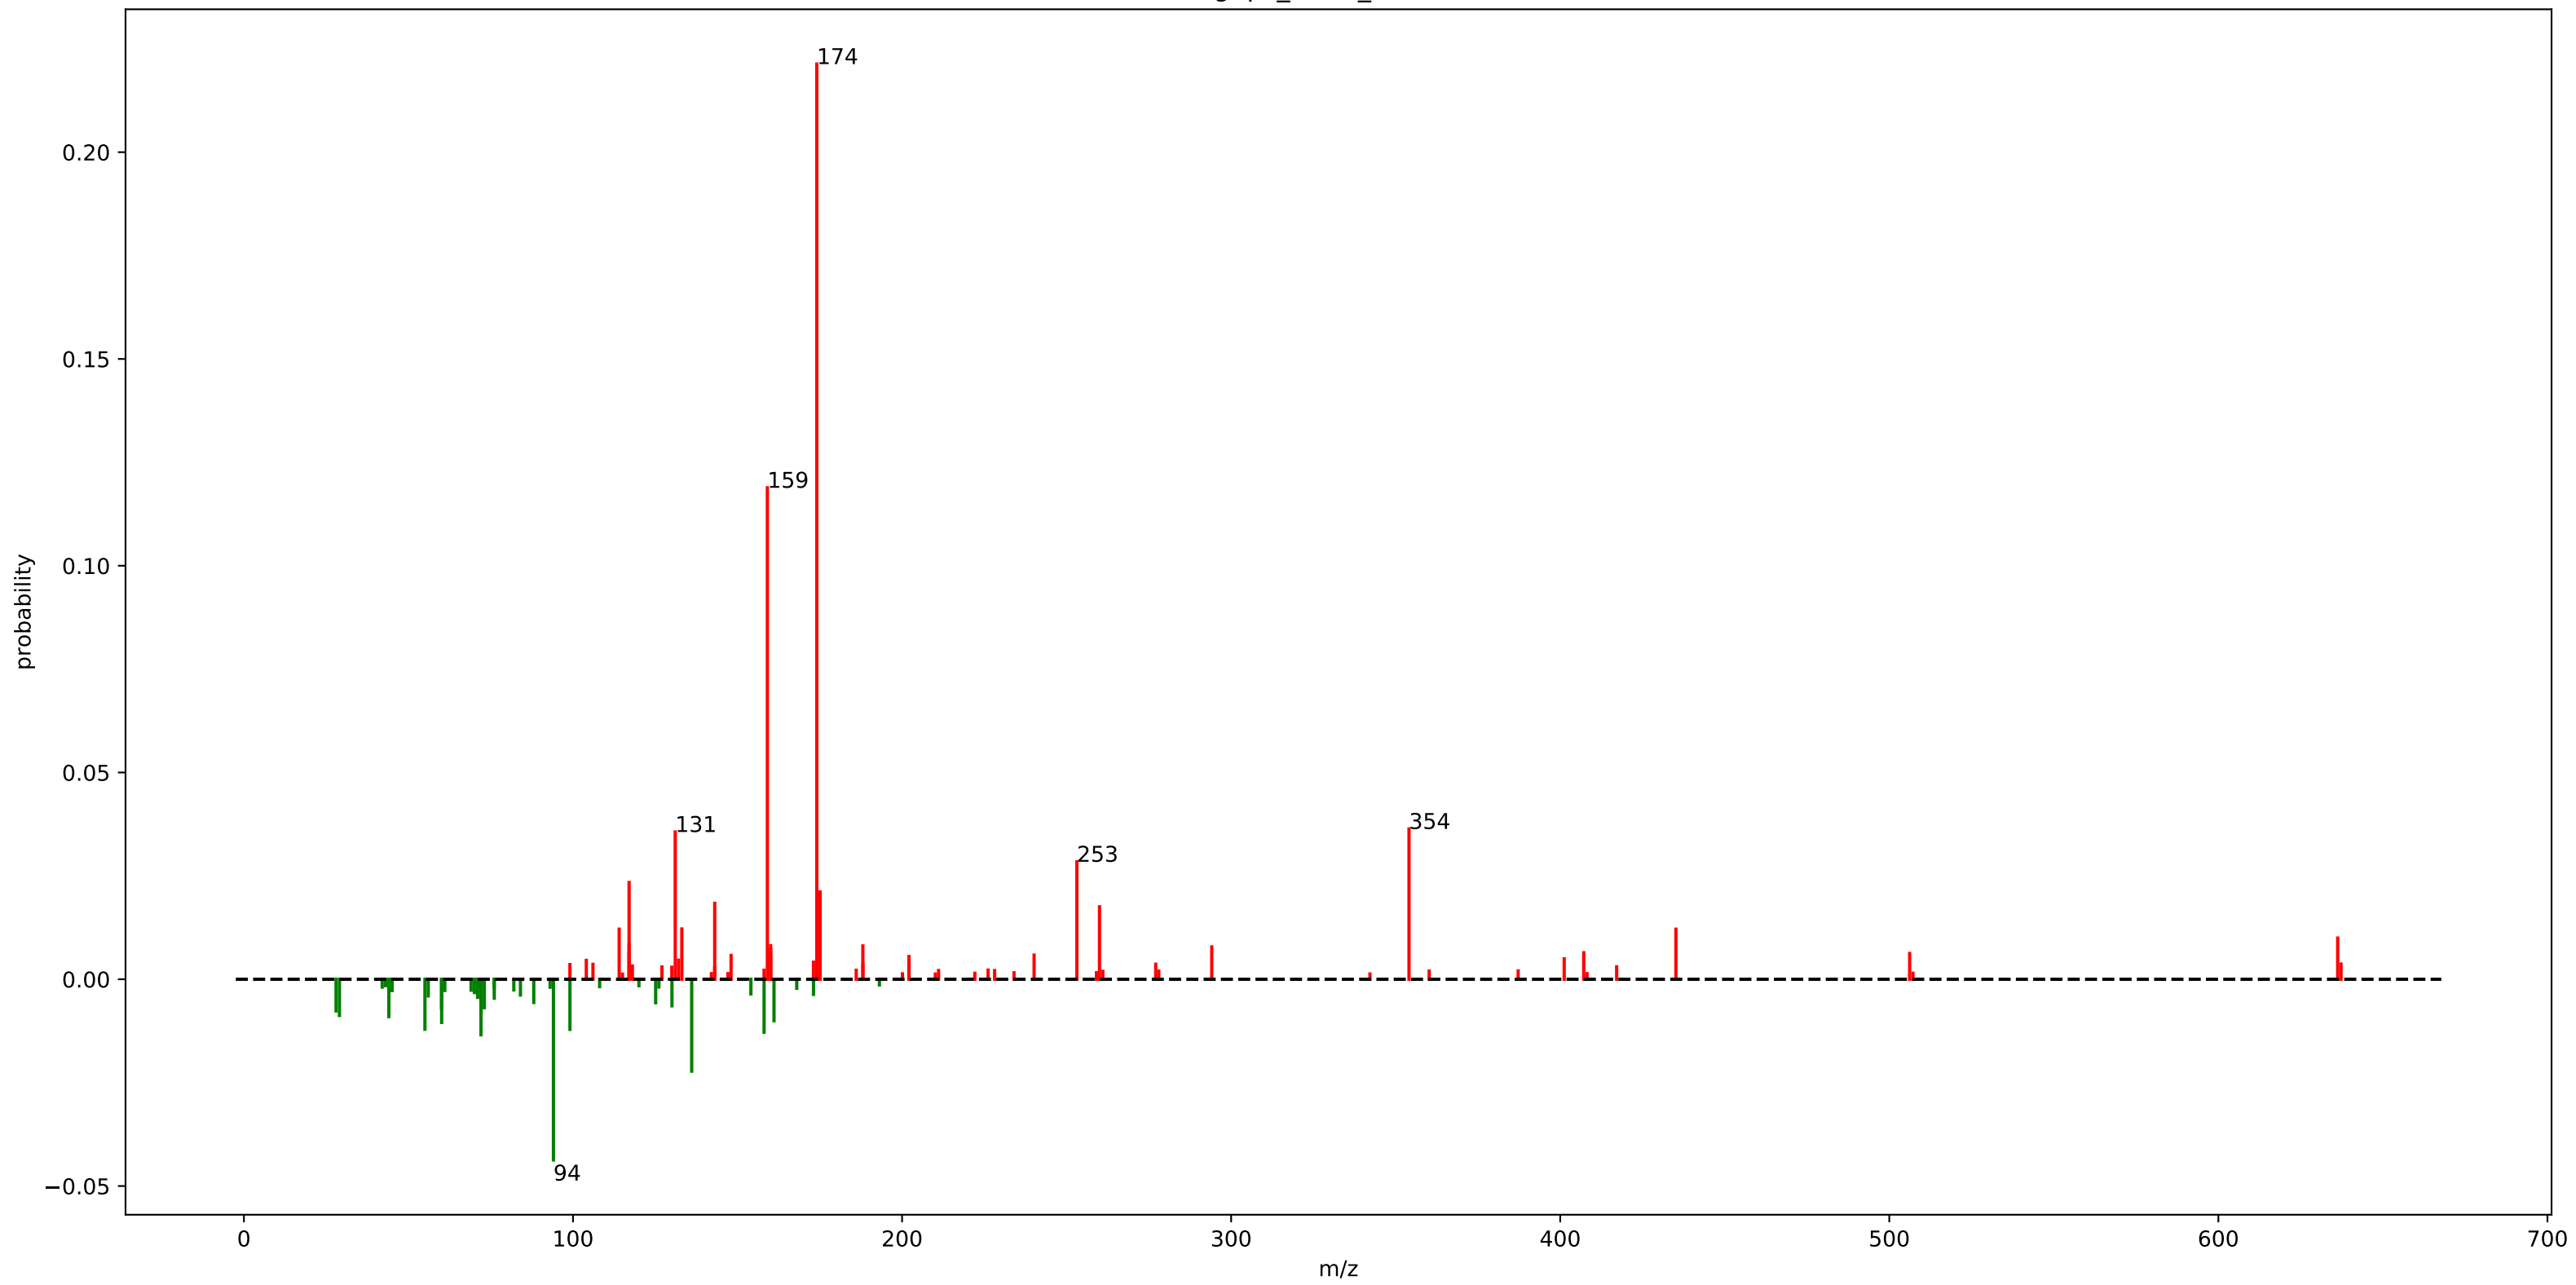

## gnps\_motif\_8.m2m

|                   |        |                   |        |                   |        |
|-------------------|--------|-------------------|--------|-------------------|--------|
| fragment_174.0925 | : 0.22 | fragment_636.2625 | : 0.01 | fragment_202.0975 | : 0.01 |
| fragment_159.0675 | : 0.12 | loss_44.0475      | : 0.01 | fragment_160.0725 | : 0.01 |
| loss_94.0525      | : 0.04 | loss_29.0275      | : 0.01 |                   |        |
| fragment_354.0525 | : 0.04 | fragment_117.0425 | : 0.01 |                   |        |
| fragment_131.0725 | : 0.04 | fragment_160.0425 | : 0.01 |                   |        |
| fragment_253.1225 | : 0.03 | fragment_188.0825 | : 0.01 |                   |        |
| fragment_117.0475 | : 0.02 | loss_72.0725      | : 0.01 |                   |        |
| loss_136.0725     | : 0.02 | fragment_294.1075 | : 0.01 |                   |        |
| fragment_175.0925 | : 0.02 | loss_27.9975      | : 0.01 |                   |        |
| fragment_143.0725 | : 0.02 | fragment_160.0825 | : 0.01 |                   |        |
| fragment_259.9975 | : 0.02 | loss_73.0525      | : 0.01 |                   |        |
| loss_72.0425      | : 0.01 | loss_60.0425      | : 0.01 |                   |        |
| loss_158.0675     | : 0.01 | loss_130.0725     | : 0.01 |                   |        |
| fragment_133.0775 | : 0.01 | fragment_407.1575 | : 0.01 |                   |        |
| loss_99.0725      | : 0.01 | fragment_506.1875 | : 0.01 |                   |        |
| fragment_435.1575 | : 0.01 | fragment_117.0575 | : 0.01 |                   |        |
| fragment_114.0375 | : 0.01 | fragment_240.1225 | : 0.01 |                   |        |
| loss_55.0075      | : 0.01 | fragment_148.0375 | : 0.01 |                   |        |
| loss_60.0825      | : 0.01 | loss_125.1225     | : 0.01 |                   |        |
| loss_161.0825     | : 0.01 | loss_88.0775      | : 0.01 |                   |        |



urine\_mass2motif\_138.m2m

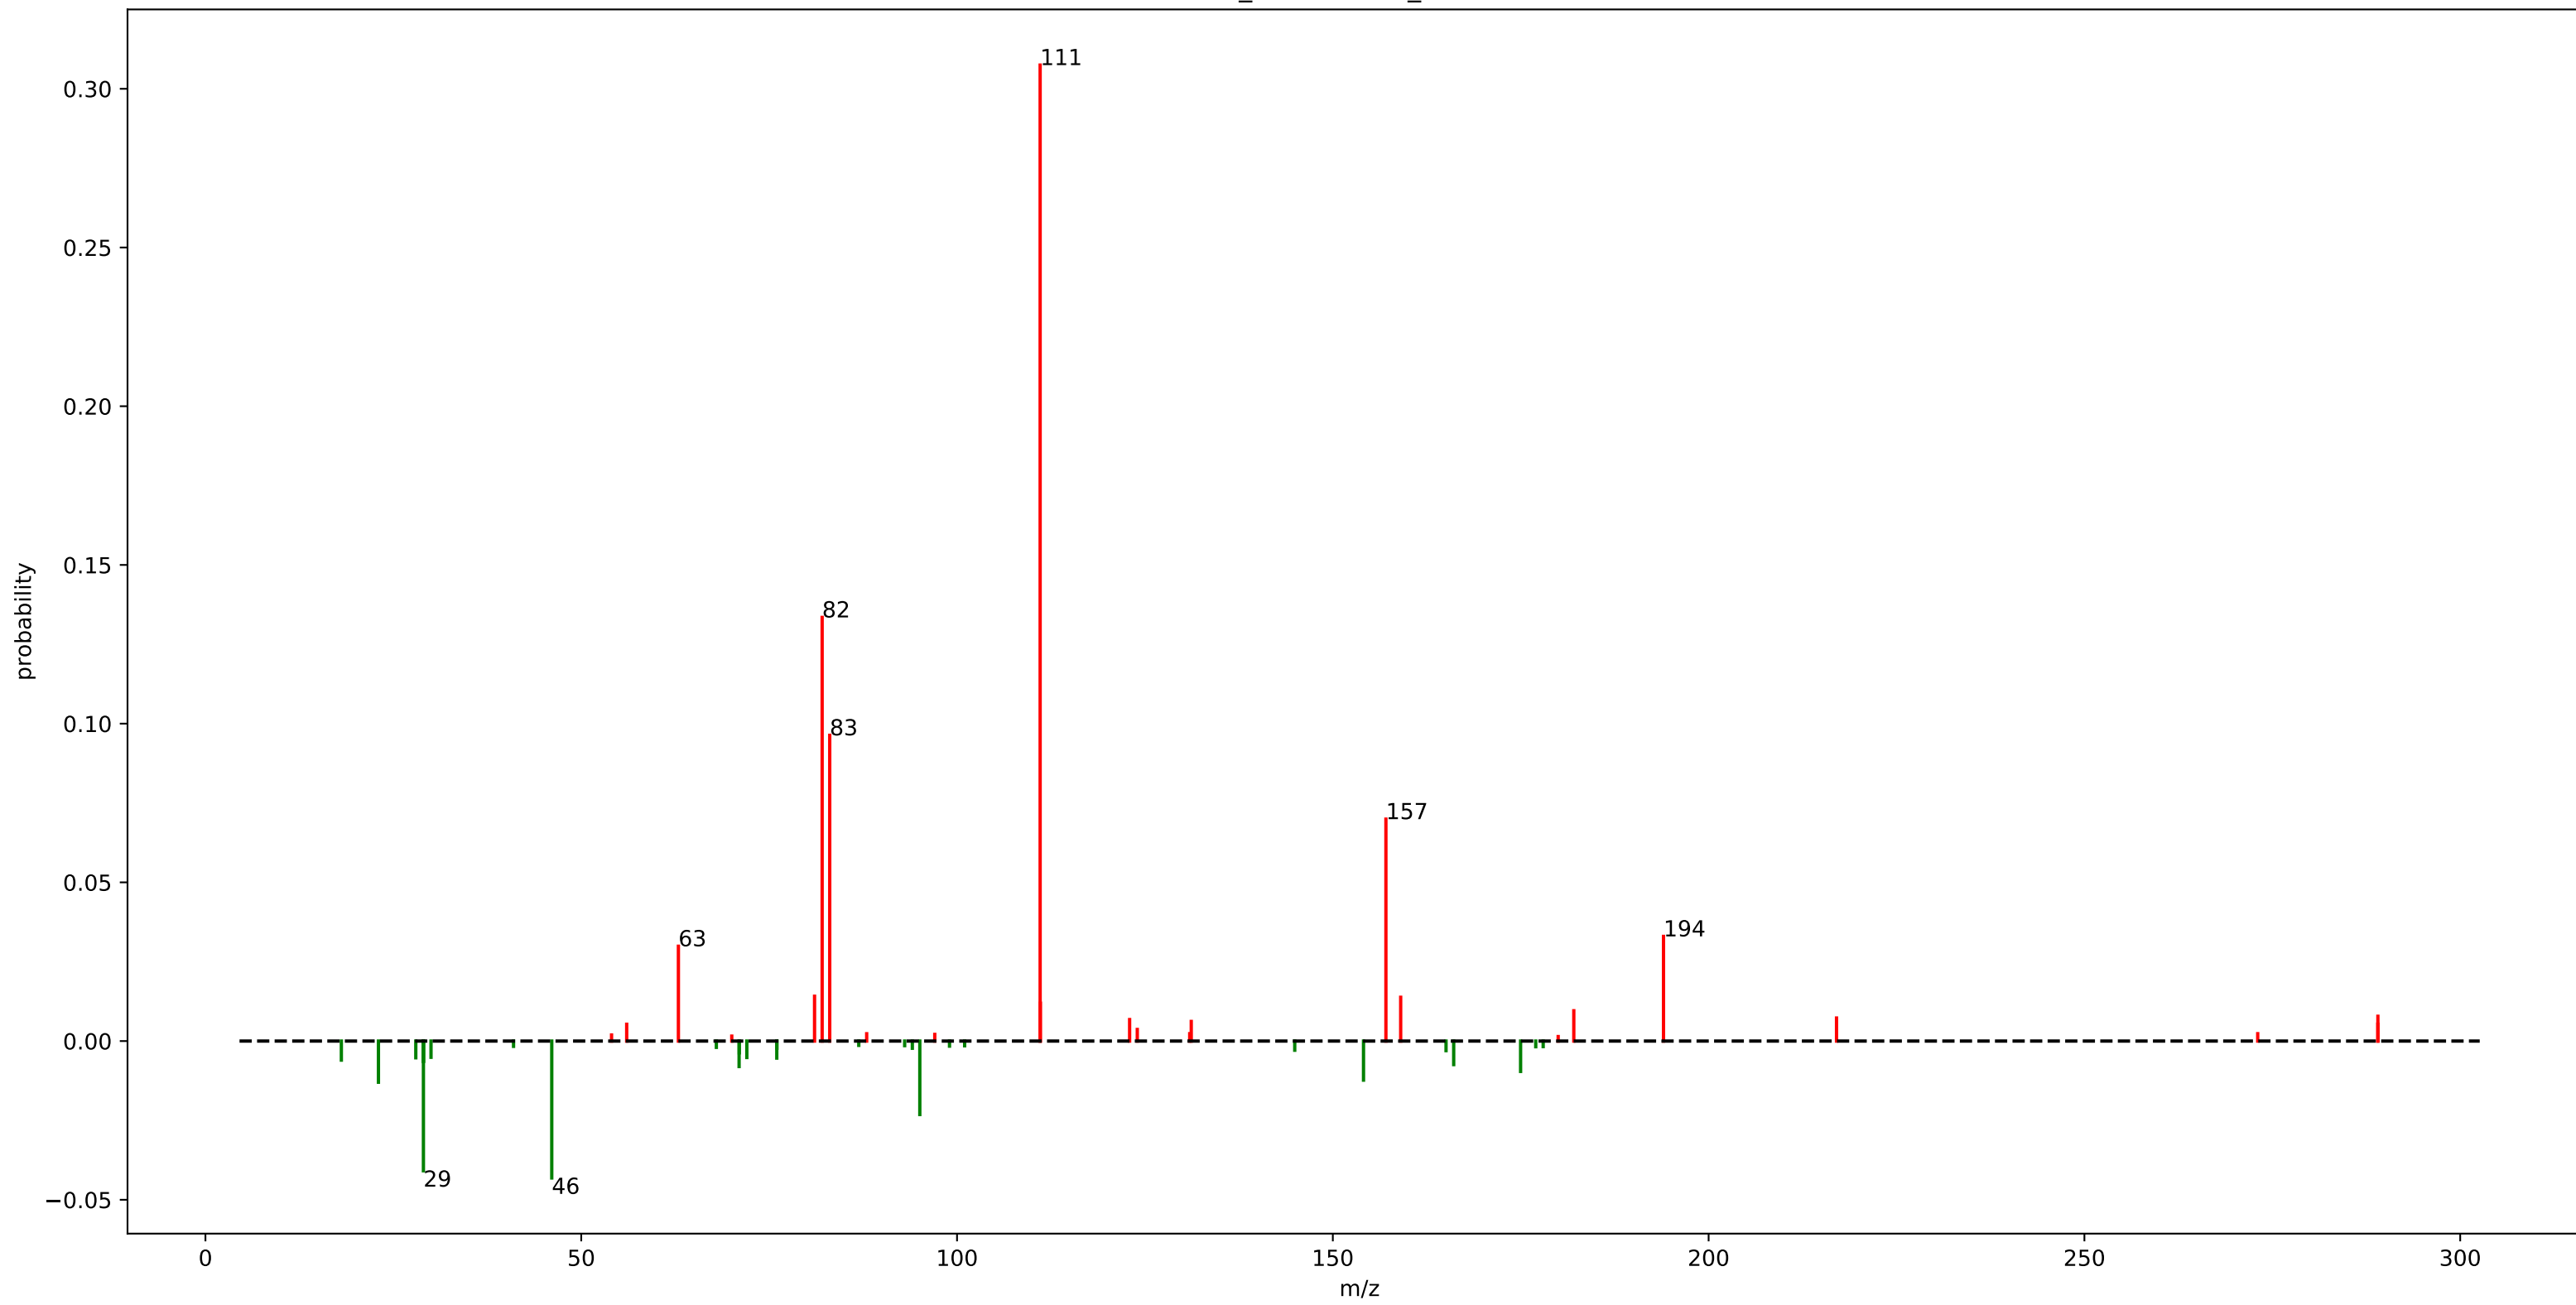

# urine\_mass2motif\_138.m2m

|                   |        |                   |        |
|-------------------|--------|-------------------|--------|
| fragment_111.0575 | : 0.31 | fragment_122.9625 | : 0.01 |
| fragment_82.0525  | : 0.13 | loss_28.9925      | : 0.01 |
| fragment_83.0625  | : 0.10 | loss_29.0225      | : 0.01 |
| fragment_157.0625 | : 0.07 | fragment_131.1625 | : 0.01 |
| loss_46.0775      | : 0.04 | loss_18.0825      | : 0.01 |
| loss_29.0025      | : 0.04 | loss_76.0175      | : 0.01 |
| fragment_193.9975 | : 0.03 | fragment_289.0425 | : 0.01 |
| fragment_62.9275  | : 0.03 | fragment_56.0475  | : 0.01 |
| loss_95.0475      | : 0.02 | loss_27.9875      | : 0.01 |
| fragment_81.0425  | : 0.01 | loss_72.0325      | : 0.01 |
| fragment_159.0275 | : 0.01 | loss_30.0125      | : 0.01 |
| loss_23.0175      | : 0.01 |                   |        |
| loss_154.0825     | : 0.01 |                   |        |
| fragment_111.0925 | : 0.01 |                   |        |
| loss_174.9825     | : 0.01 |                   |        |
| fragment_182.0625 | : 0.01 |                   |        |
| loss_71.0025      | : 0.01 |                   |        |
| fragment_289.0475 | : 0.01 |                   |        |
| loss_166.0825     | : 0.01 |                   |        |
| fragment_217.0175 | : 0.01 |                   |        |

gnps\_motif\_26.m2m

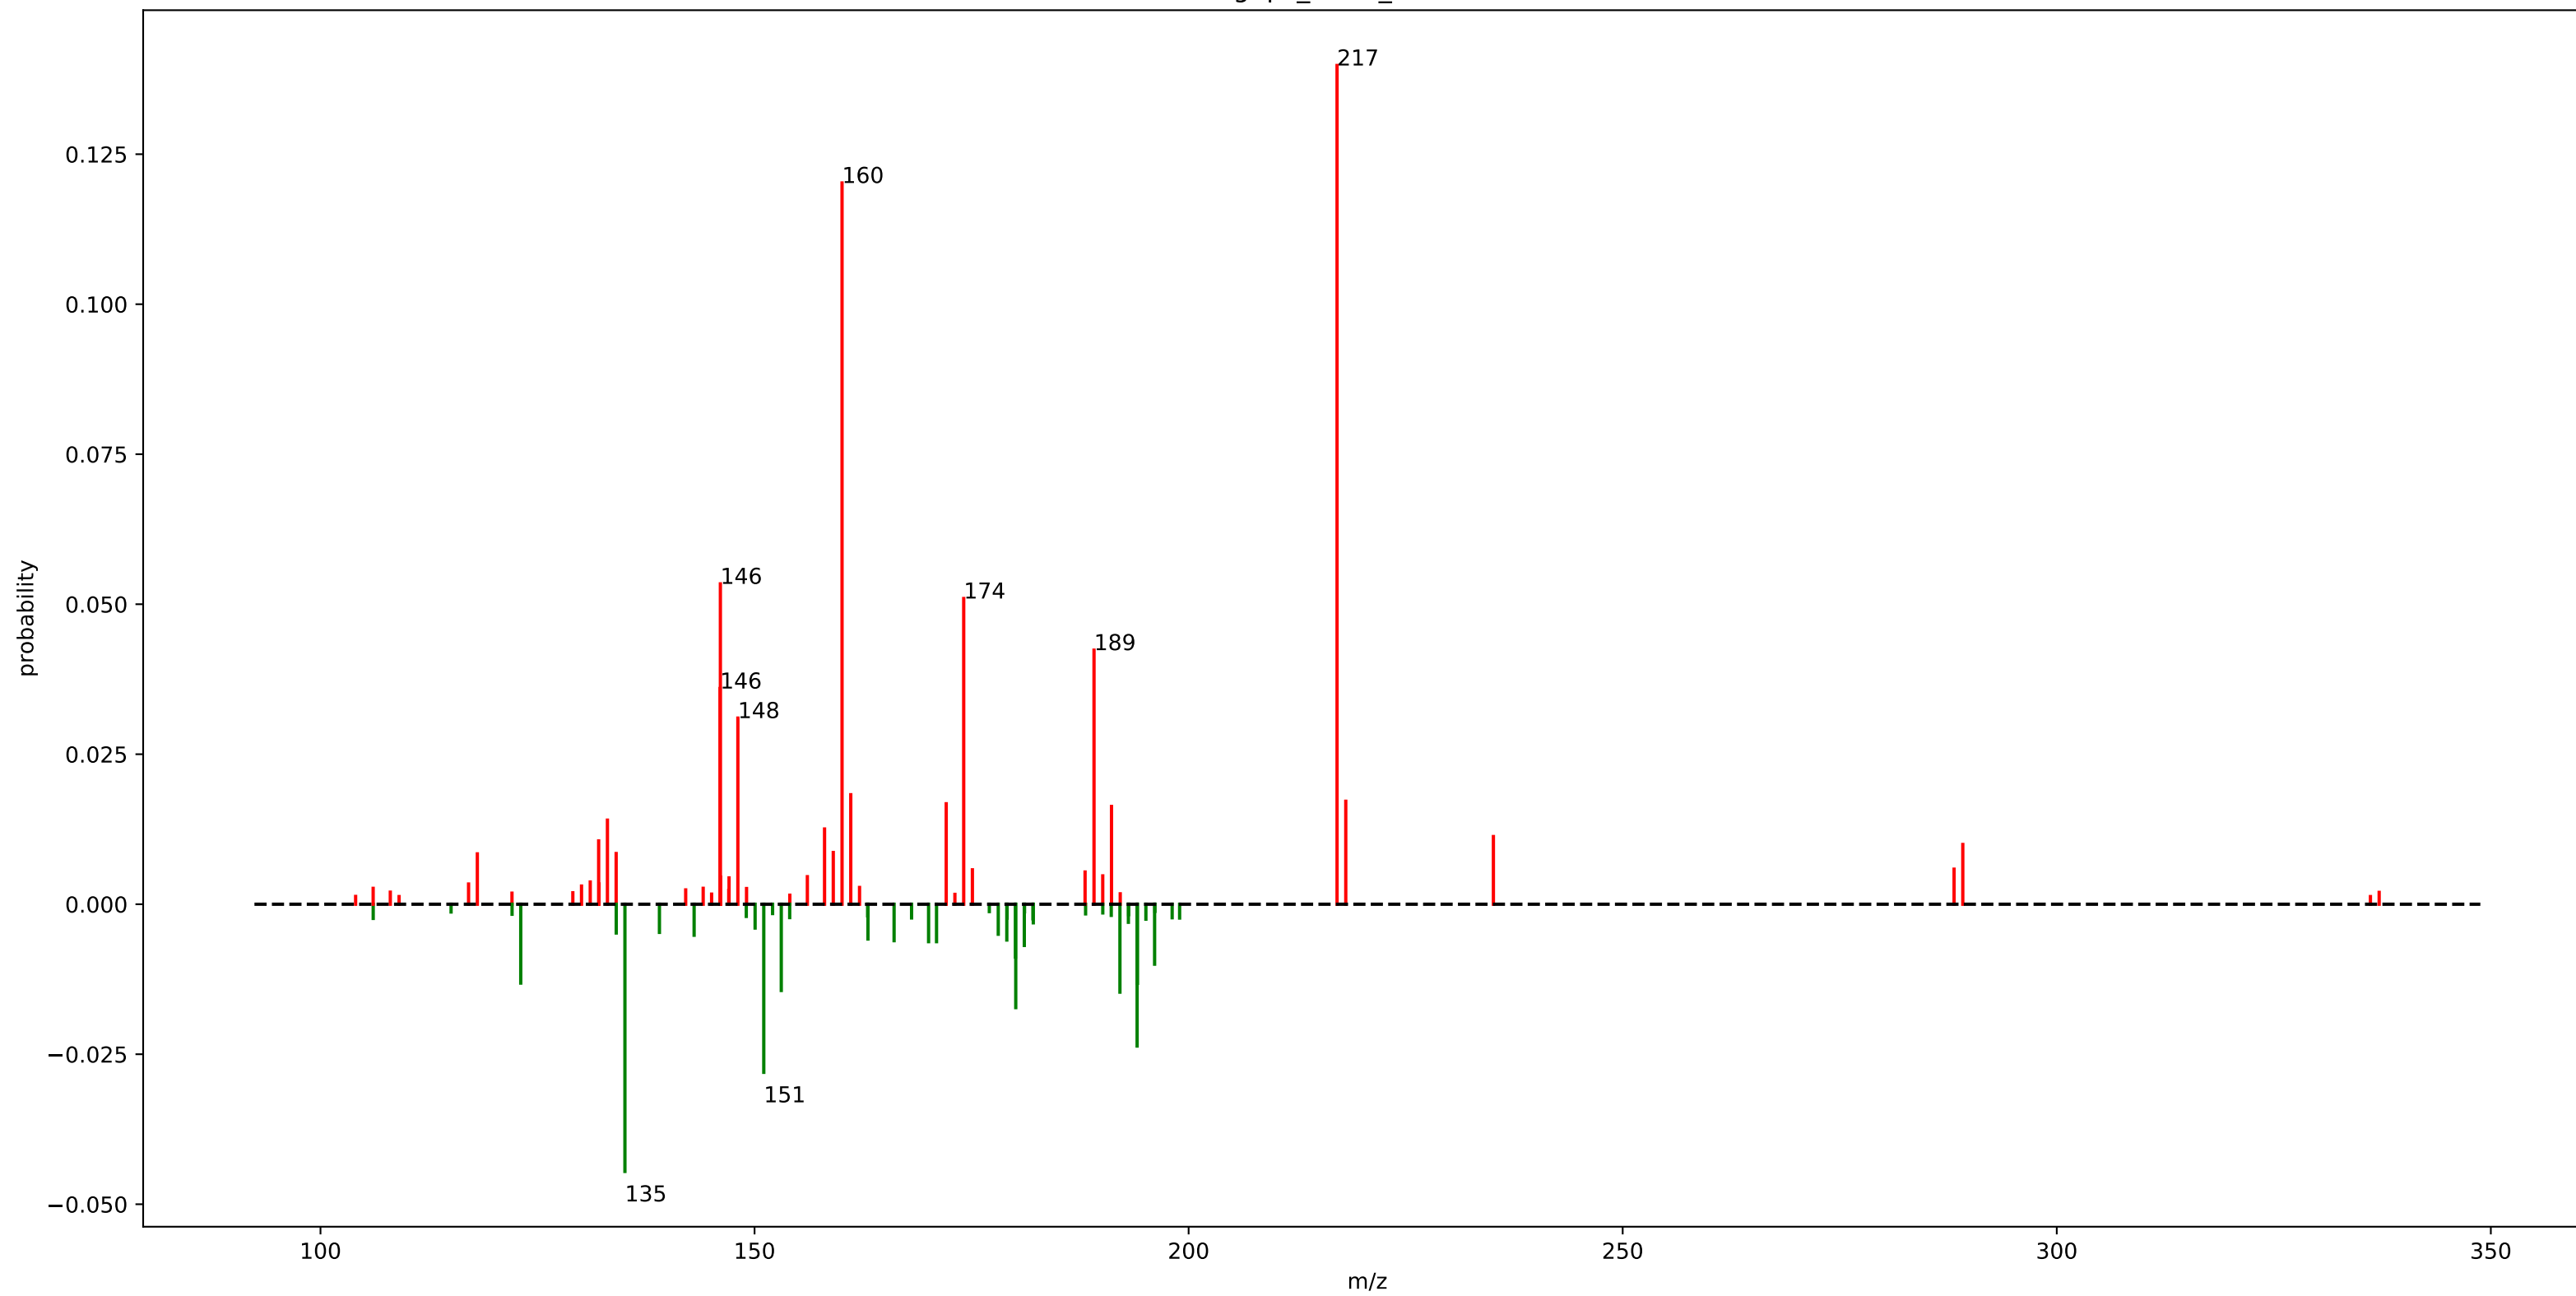

## gnps\_motif\_26.m2m

|                   |        |                   |        |
|-------------------|--------|-------------------|--------|
| fragment_217.0975 | : 0.14 | fragment_158.0625 | : 0.01 |
| fragment_160.0775 | : 0.12 | fragment_235.1075 | : 0.01 |
| fragment_146.0625 | : 0.05 | fragment_132.0425 | : 0.01 |
| fragment_174.0925 | : 0.05 | loss_196.0825     | : 0.01 |
| loss_135.0675     | : 0.04 | fragment_289.1775 | : 0.01 |
| fragment_189.1025 | : 0.04 | loss_180.0525     | : 0.01 |
| fragment_146.0225 | : 0.04 | fragment_159.0675 | : 0.01 |
| fragment_148.0775 | : 0.03 | fragment_134.0575 | : 0.01 |
| loss_151.0625     | : 0.03 | fragment_118.0675 | : 0.01 |
| loss_194.0675     | : 0.02 | loss_181.0725     | : 0.01 |
| fragment_161.0825 | : 0.02 | loss_170.9625     | : 0.01 |
| loss_180.0875     | : 0.02 | loss_170.0475     | : 0.01 |
| fragment_218.1025 | : 0.02 | loss_166.0725     | : 0.01 |
| fragment_172.0775 | : 0.02 | loss_179.0575     | : 0.01 |
| fragment_191.1175 | : 0.02 | fragment_288.1725 | : 0.01 |
| loss_192.0875     | : 0.01 | loss_163.0625     | : 0.01 |
| loss_153.0775     | : 0.01 | fragment_175.0925 | : 0.01 |
| fragment_133.0525 | : 0.01 | fragment_188.0725 | : 0.01 |
| loss_194.1075     | : 0.01 | loss_143.0375     | : 0.01 |
| loss_123.0675     | : 0.01 |                   |        |

euphorbia\_motif\_207.m2m

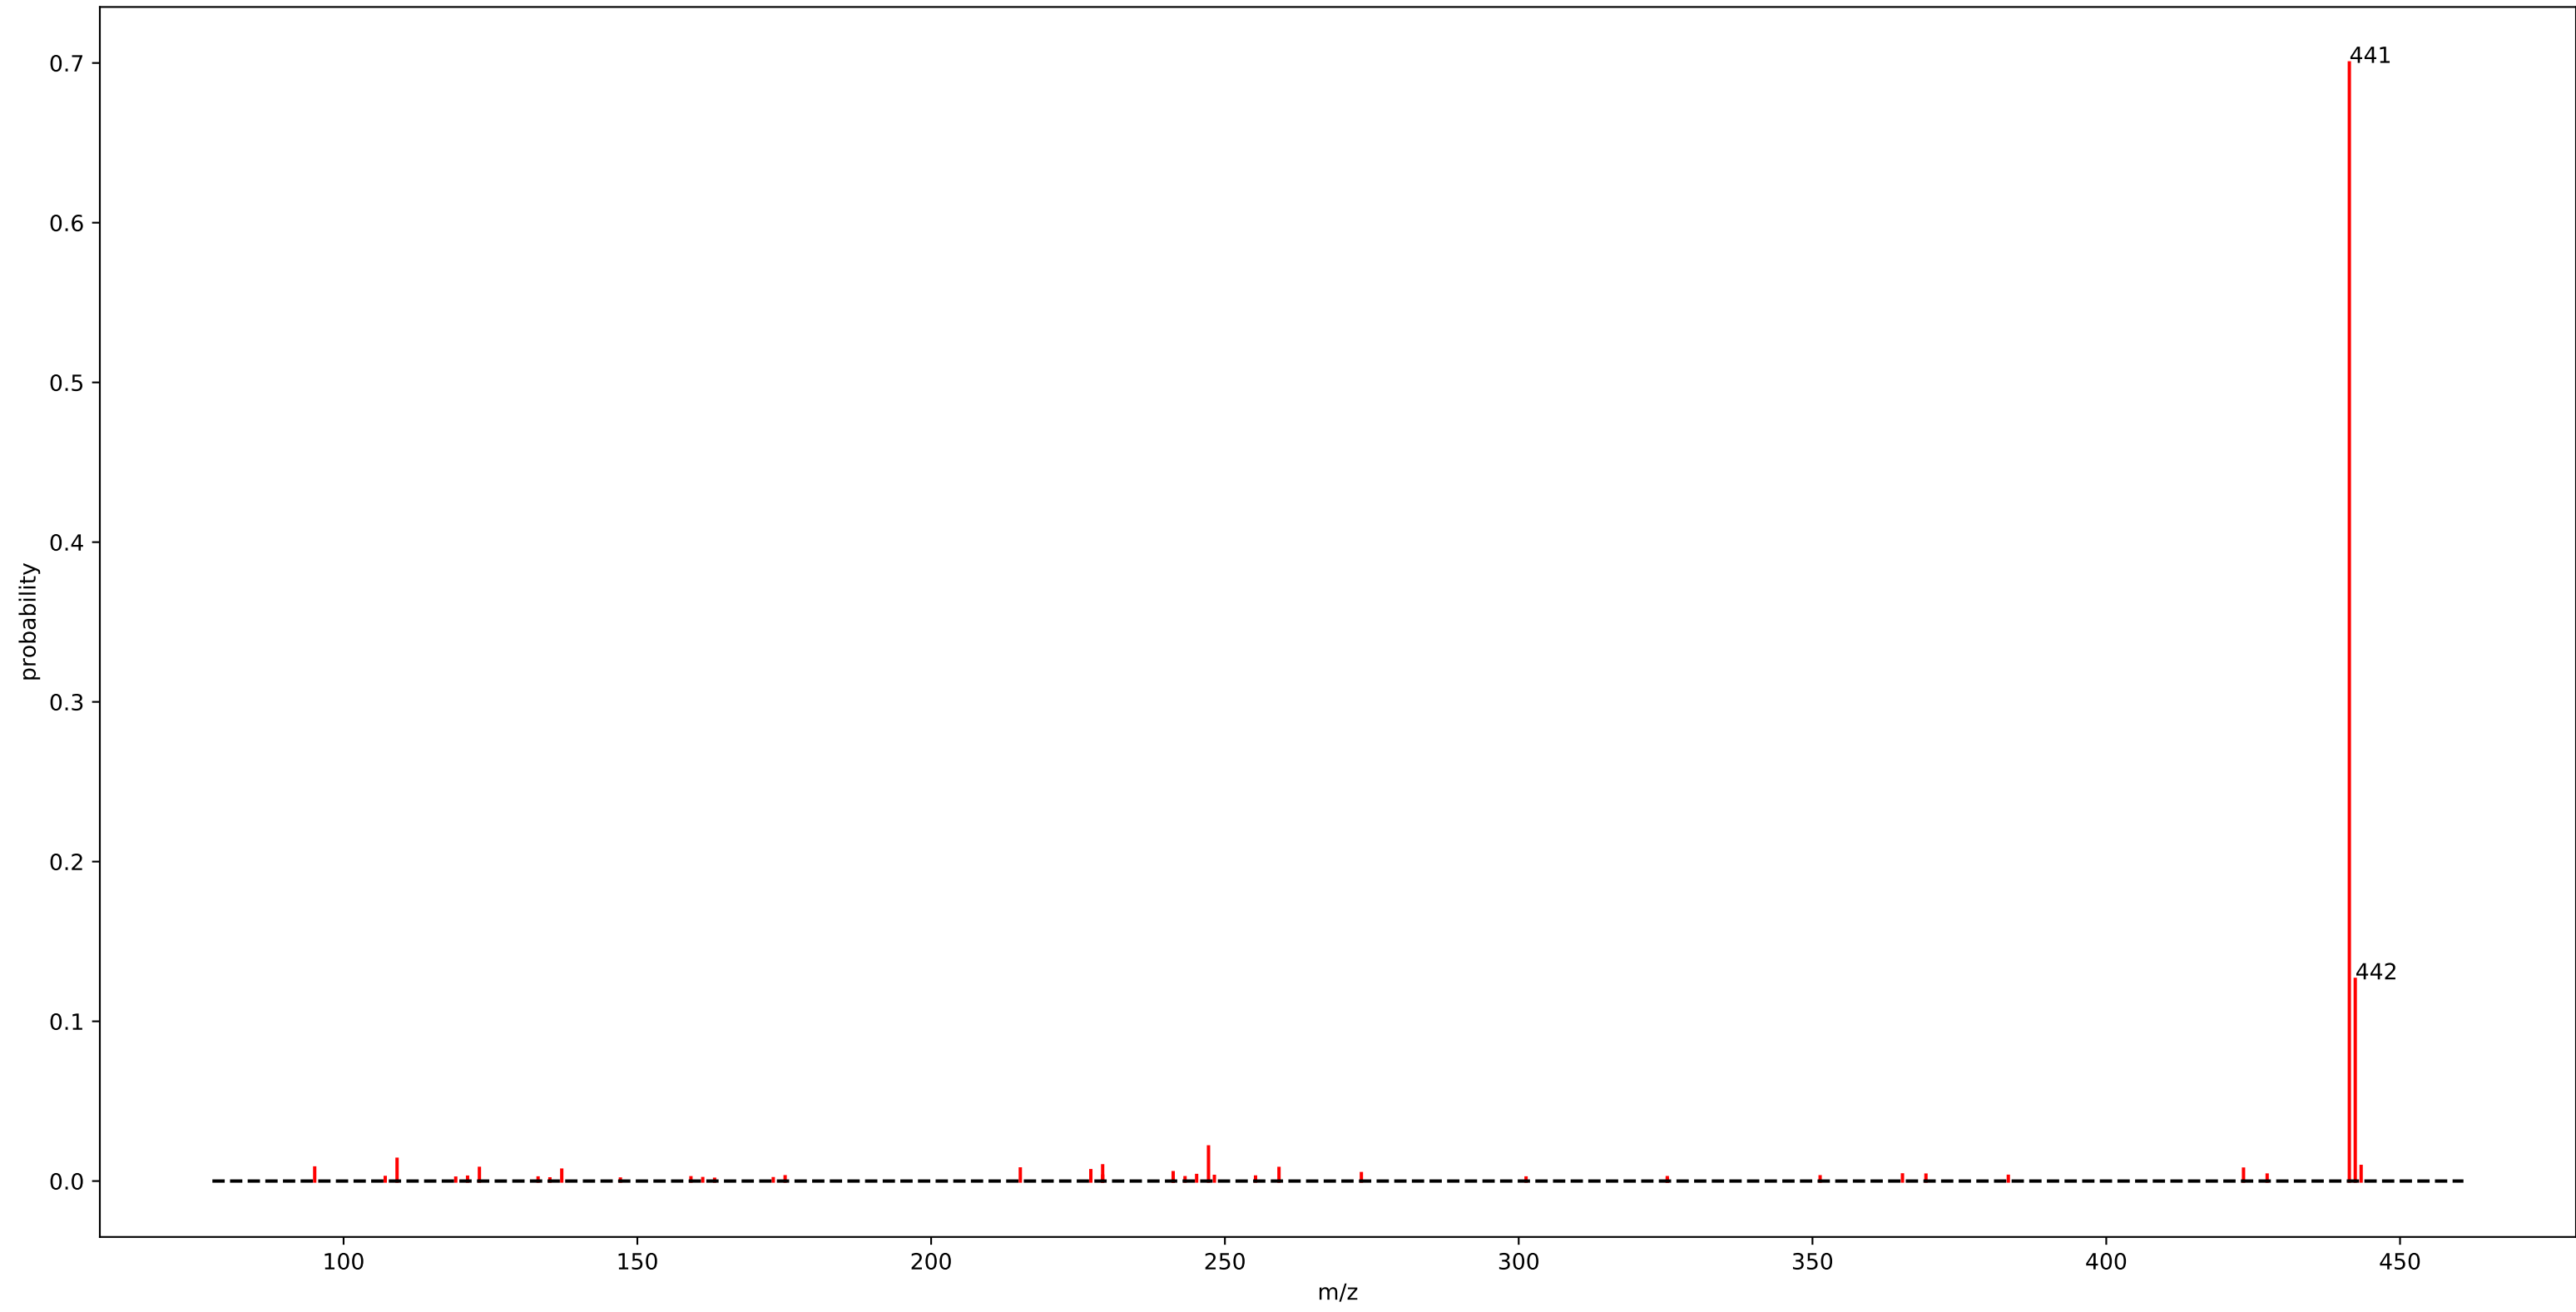

## euphorbia\_motif\_207.m2m

|                   |        |
|-------------------|--------|
| fragment_441.3725 | : 0.70 |
| fragment_442.3775 | : 0.13 |
| fragment_247.2075 | : 0.02 |
| fragment_109.1025 | : 0.01 |
| fragment_229.1925 | : 0.01 |
| fragment_443.3775 | : 0.01 |
| fragment_95.0875  | : 0.01 |
| fragment_123.1175 | : 0.01 |
| fragment_259.2025 | : 0.01 |
| fragment_215.1775 | : 0.01 |
| fragment_423.3625 | : 0.01 |
| fragment_137.1325 | : 0.01 |
| fragment_227.1775 | : 0.01 |
| fragment_241.1925 | : 0.01 |

StrepSalini\_motif\_110.m2m

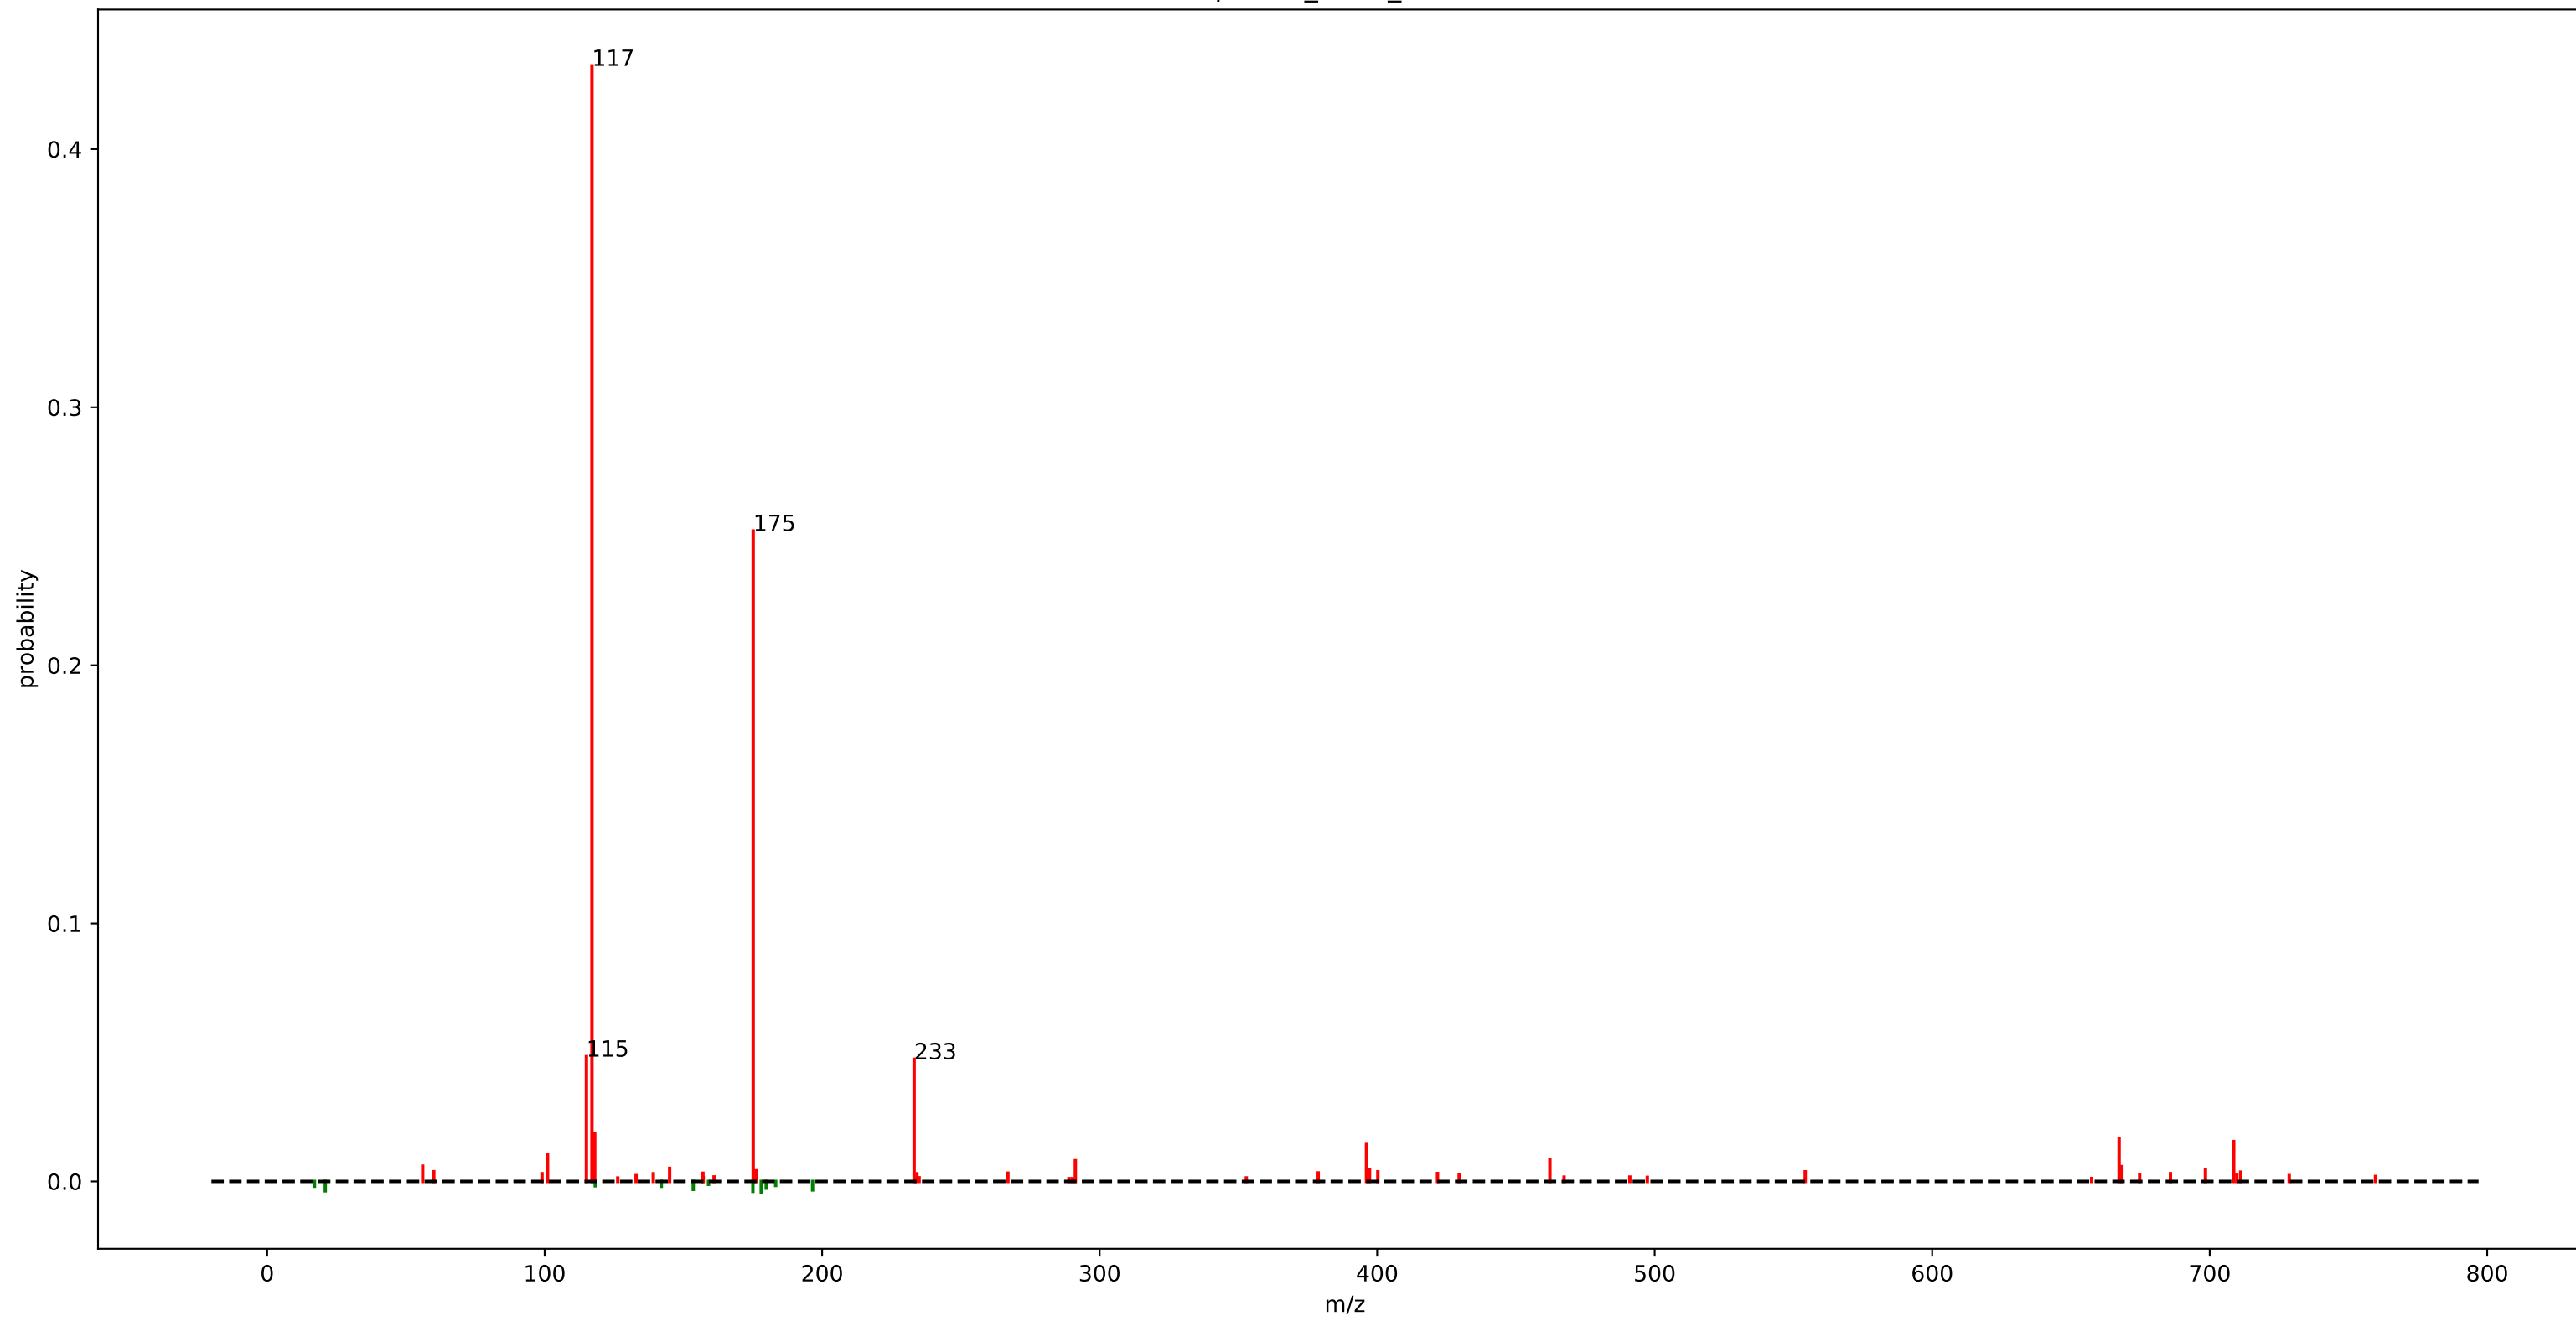

## StrepSalini\_motif\_110.m2m

|                   |        |
|-------------------|--------|
| fragment_117.0500 | : 0.43 |
| fragment_175.1500 | : 0.25 |
| fragment_115.0500 | : 0.05 |
| fragment_233.1500 | : 0.05 |
| fragment_118.0500 | : 0.02 |
| fragment_667.3500 | : 0.02 |
| fragment_708.6500 | : 0.02 |
| fragment_396.1500 | : 0.01 |
| fragment_101.0500 | : 0.01 |
| fragment_462.2500 | : 0.01 |
| fragment_291.2500 | : 0.01 |
| fragment_56.0500  | : 0.01 |
| fragment_668.3500 | : 0.01 |
| fragment_145.0500 | : 0.01 |



gnps\_motif\_9.m2m

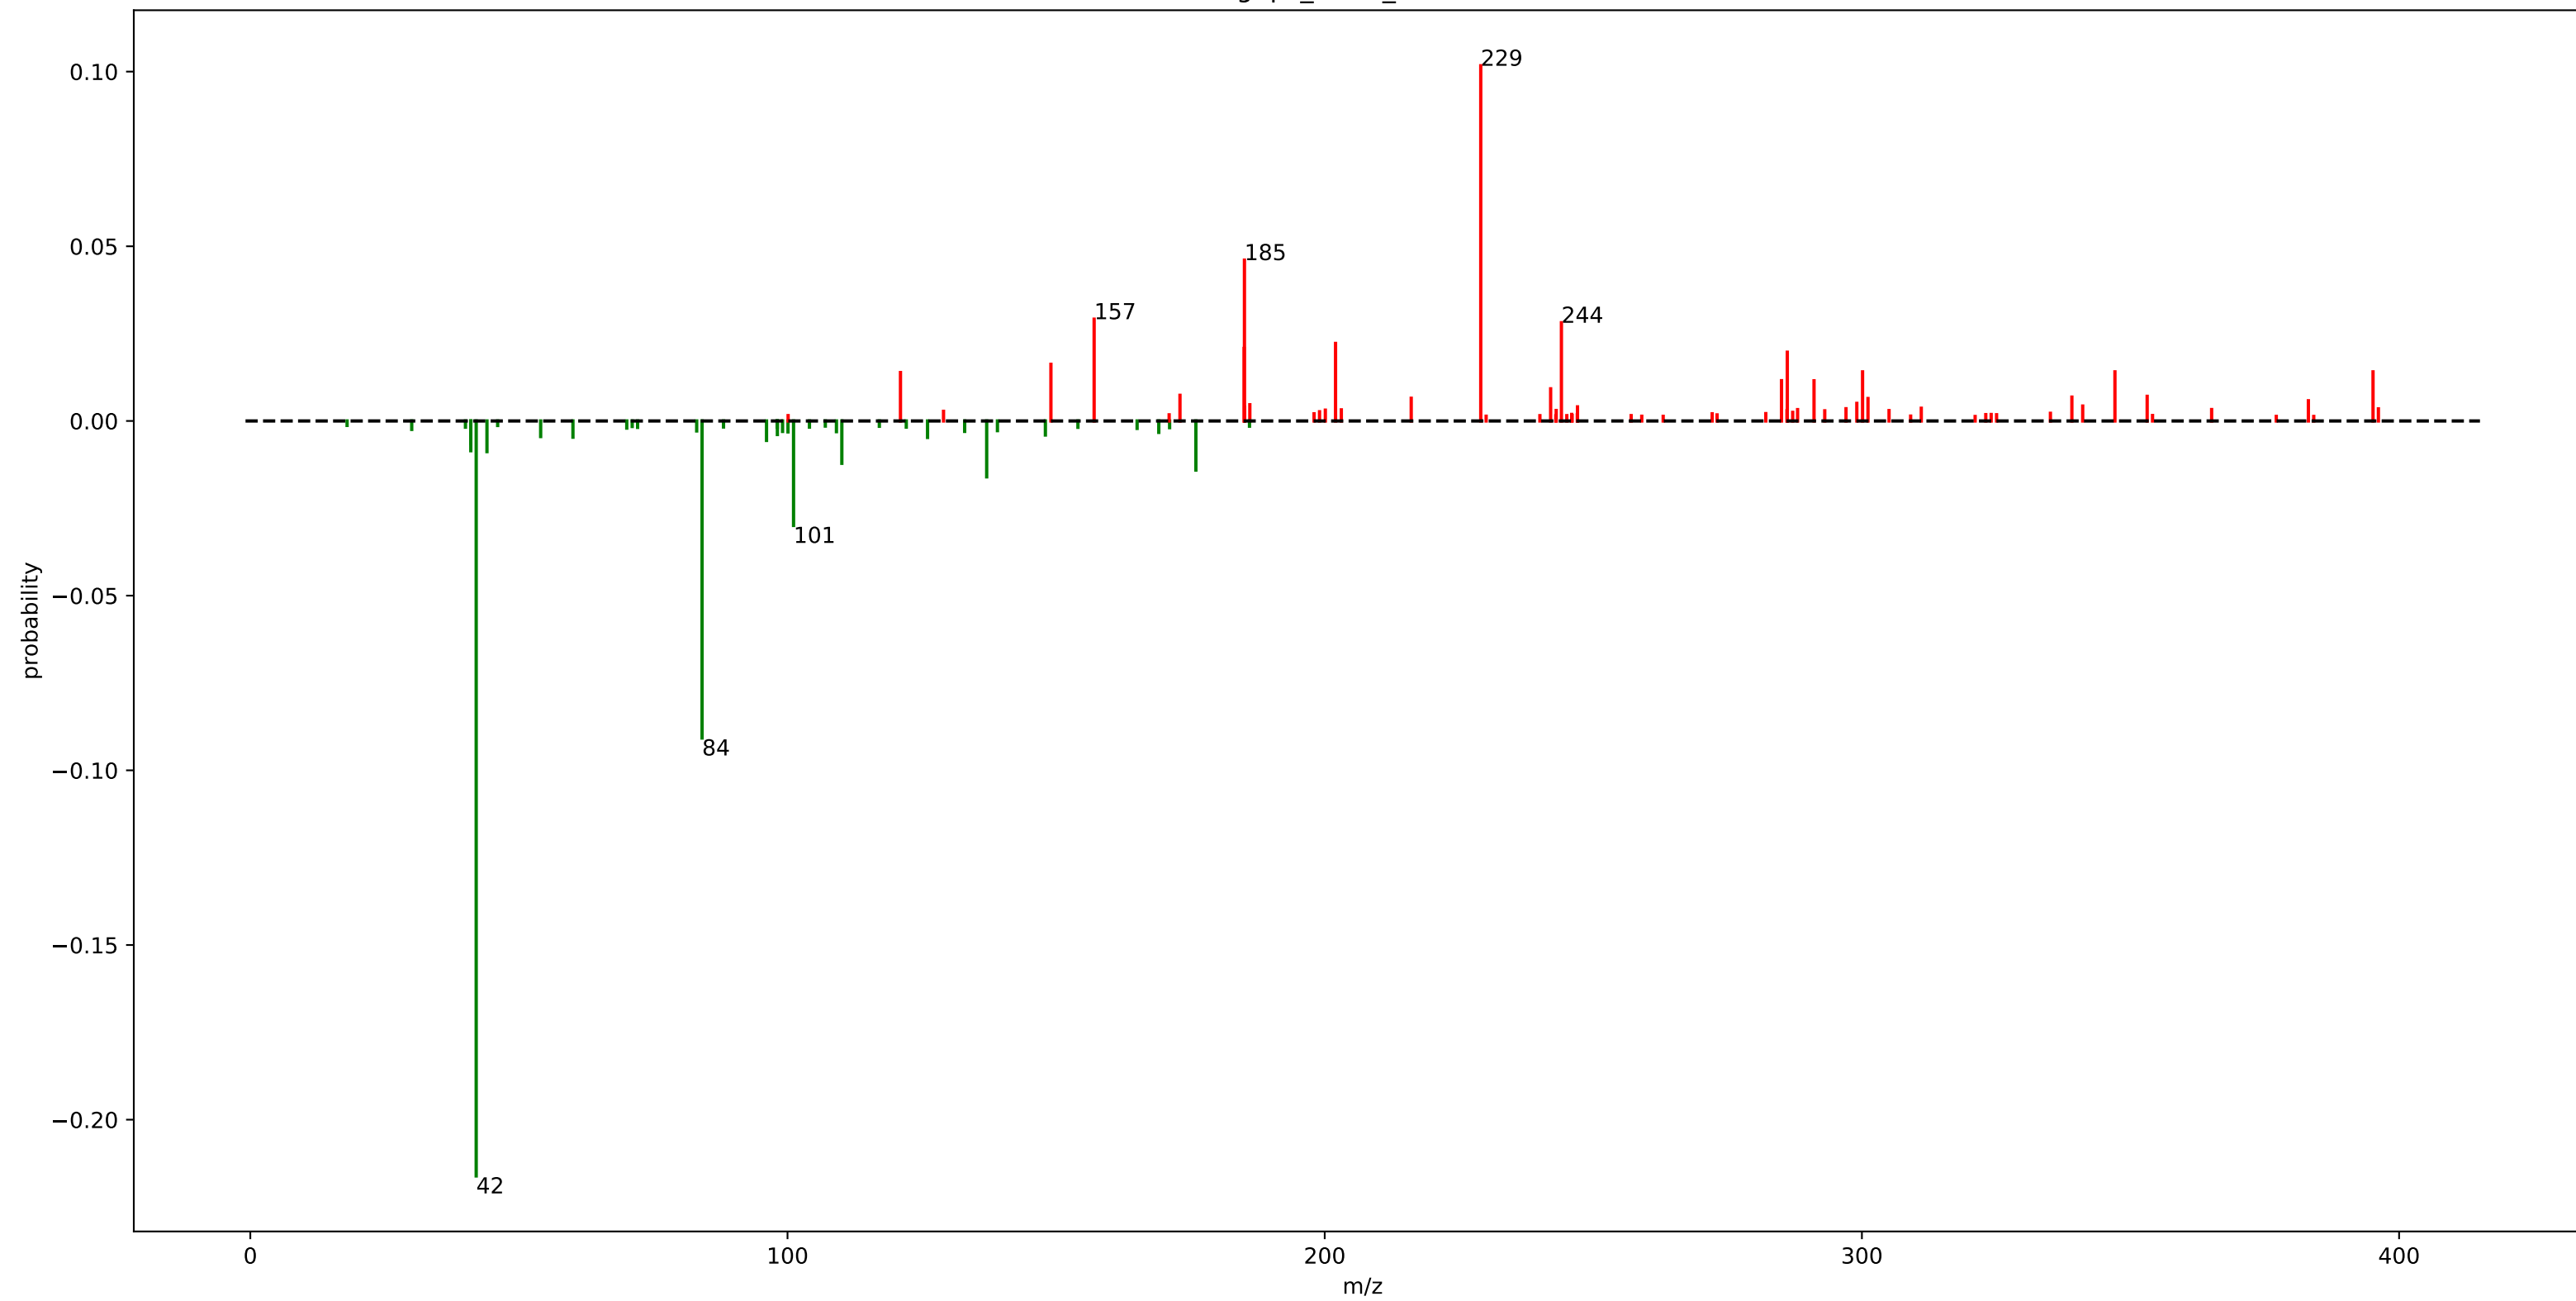

# gnps\_motif\_9.m2m

|                   |        |                   |        |
|-------------------|--------|-------------------|--------|
| loss_42.0475      | : 0.22 | fragment_242.0575 | : 0.01 |
| fragment_229.0475 | : 0.10 | loss_44.0525      | : 0.01 |
| loss_84.0925      | : 0.09 | loss_41.0425      | : 0.01 |
| fragment_185.0575 | : 0.05 | fragment_173.0575 | : 0.01 |
| loss_101.1225     | : 0.03 | fragment_353.1025 | : 0.01 |
| fragment_157.0775 | : 0.03 | fragment_339.0875 | : 0.01 |
| fragment_244.0625 | : 0.03 | fragment_216.1025 | : 0.01 |
| fragment_202.0175 | : 0.02 | fragment_301.1325 | : 0.01 |
| fragment_184.9925 | : 0.02 | loss_41.0375      | : 0.01 |
| fragment_286.1125 | : 0.02 | fragment_383.1125 | : 0.01 |
| fragment_149.0325 | : 0.02 | loss_96.0925      | : 0.01 |
| loss_137.0775     | : 0.02 | fragment_299.0525 | : 0.01 |
| loss_176.0175     | : 0.01 |                   |        |
| fragment_347.1025 | : 0.01 |                   |        |
| fragment_395.1475 | : 0.01 |                   |        |
| fragment_300.1225 | : 0.01 |                   |        |
| fragment_121.0275 | : 0.01 |                   |        |
| loss_110.1125     | : 0.01 |                   |        |
| fragment_285.0375 | : 0.01 |                   |        |
| fragment_291.0875 | : 0.01 |                   |        |

urine\_mass2motif\_22.m2m

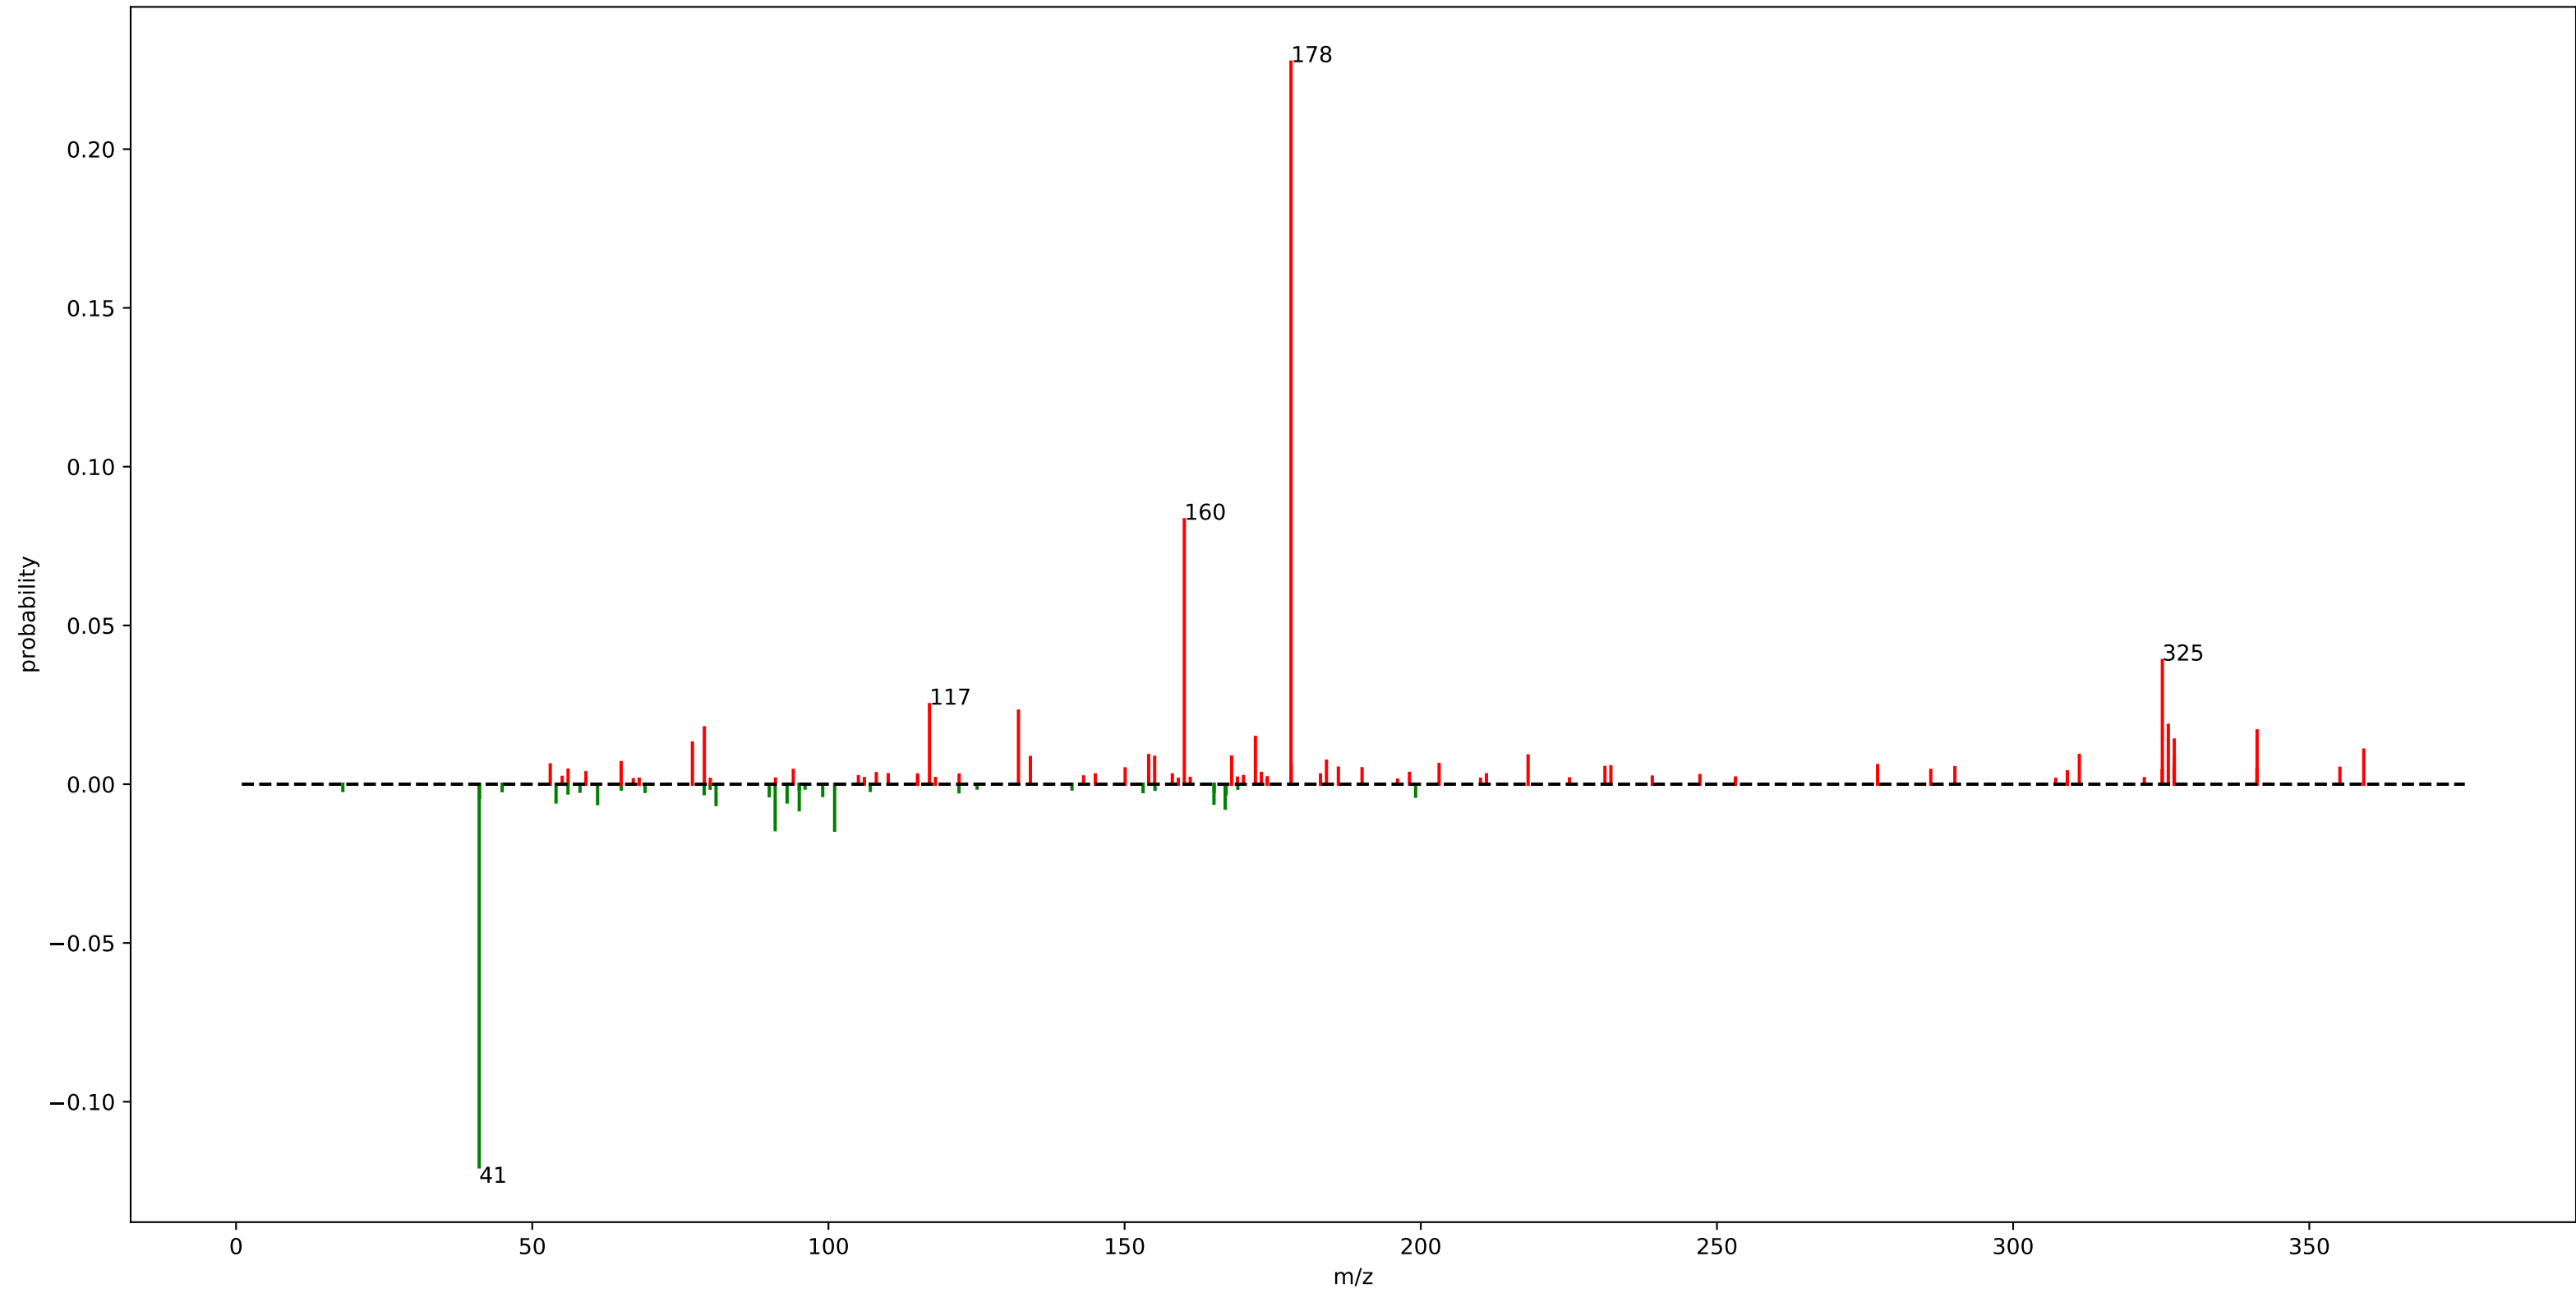

# urine\_mass2motif\_22.m2m

|                   |        |                   |        |                   |        |
|-------------------|--------|-------------------|--------|-------------------|--------|
| fragment_178.0875 | : 0.23 | fragment_134.0975 | : 0.01 | fragment_355.1675 | : 0.01 |
| loss_41.0375      | : 0.12 | fragment_327.2075 | : 0.01 |                   |        |
| fragment_160.0775 | : 0.08 | loss_95.0725      | : 0.01 |                   |        |
| fragment_325.1925 | : 0.04 | loss_166.9725     | : 0.01 |                   |        |
| fragment_117.0575 | : 0.03 | fragment_184.0775 | : 0.01 |                   |        |
| fragment_132.0825 | : 0.02 | fragment_65.0075  | : 0.01 |                   |        |
| fragment_326.1975 | : 0.02 | loss_81.0225      | : 0.01 |                   |        |
| fragment_79.0525  | : 0.02 | fragment_203.0925 | : 0.01 |                   |        |
| fragment_341.1825 | : 0.02 | fragment_178.1325 | : 0.01 |                   |        |
| fragment_172.0775 | : 0.01 | loss_61.0275      | : 0.01 |                   |        |
| loss_101.0475     | : 0.01 | fragment_53.0375  | : 0.01 |                   |        |
| loss_91.0075      | : 0.01 | loss_165.0875     | : 0.01 |                   |        |
| fragment_327.2025 | : 0.01 | fragment_277.1175 | : 0.01 |                   |        |
| fragment_77.0375  | : 0.01 | loss_93.0225      | : 0.01 |                   |        |
| fragment_359.1975 | : 0.01 | loss_54.0125      | : 0.01 |                   |        |
| fragment_311.1775 | : 0.01 | fragment_232.0925 | : 0.01 |                   |        |
| fragment_154.0625 | : 0.01 | fragment_327.1675 | : 0.01 |                   |        |
| fragment_218.1175 | : 0.01 | fragment_231.0875 | : 0.01 |                   |        |
| fragment_168.0625 | : 0.01 | fragment_290.1625 | : 0.01 |                   |        |
| fragment_155.0725 | : 0.01 | fragment_186.0875 | : 0.01 |                   |        |

mb\_motif\_195.m2m

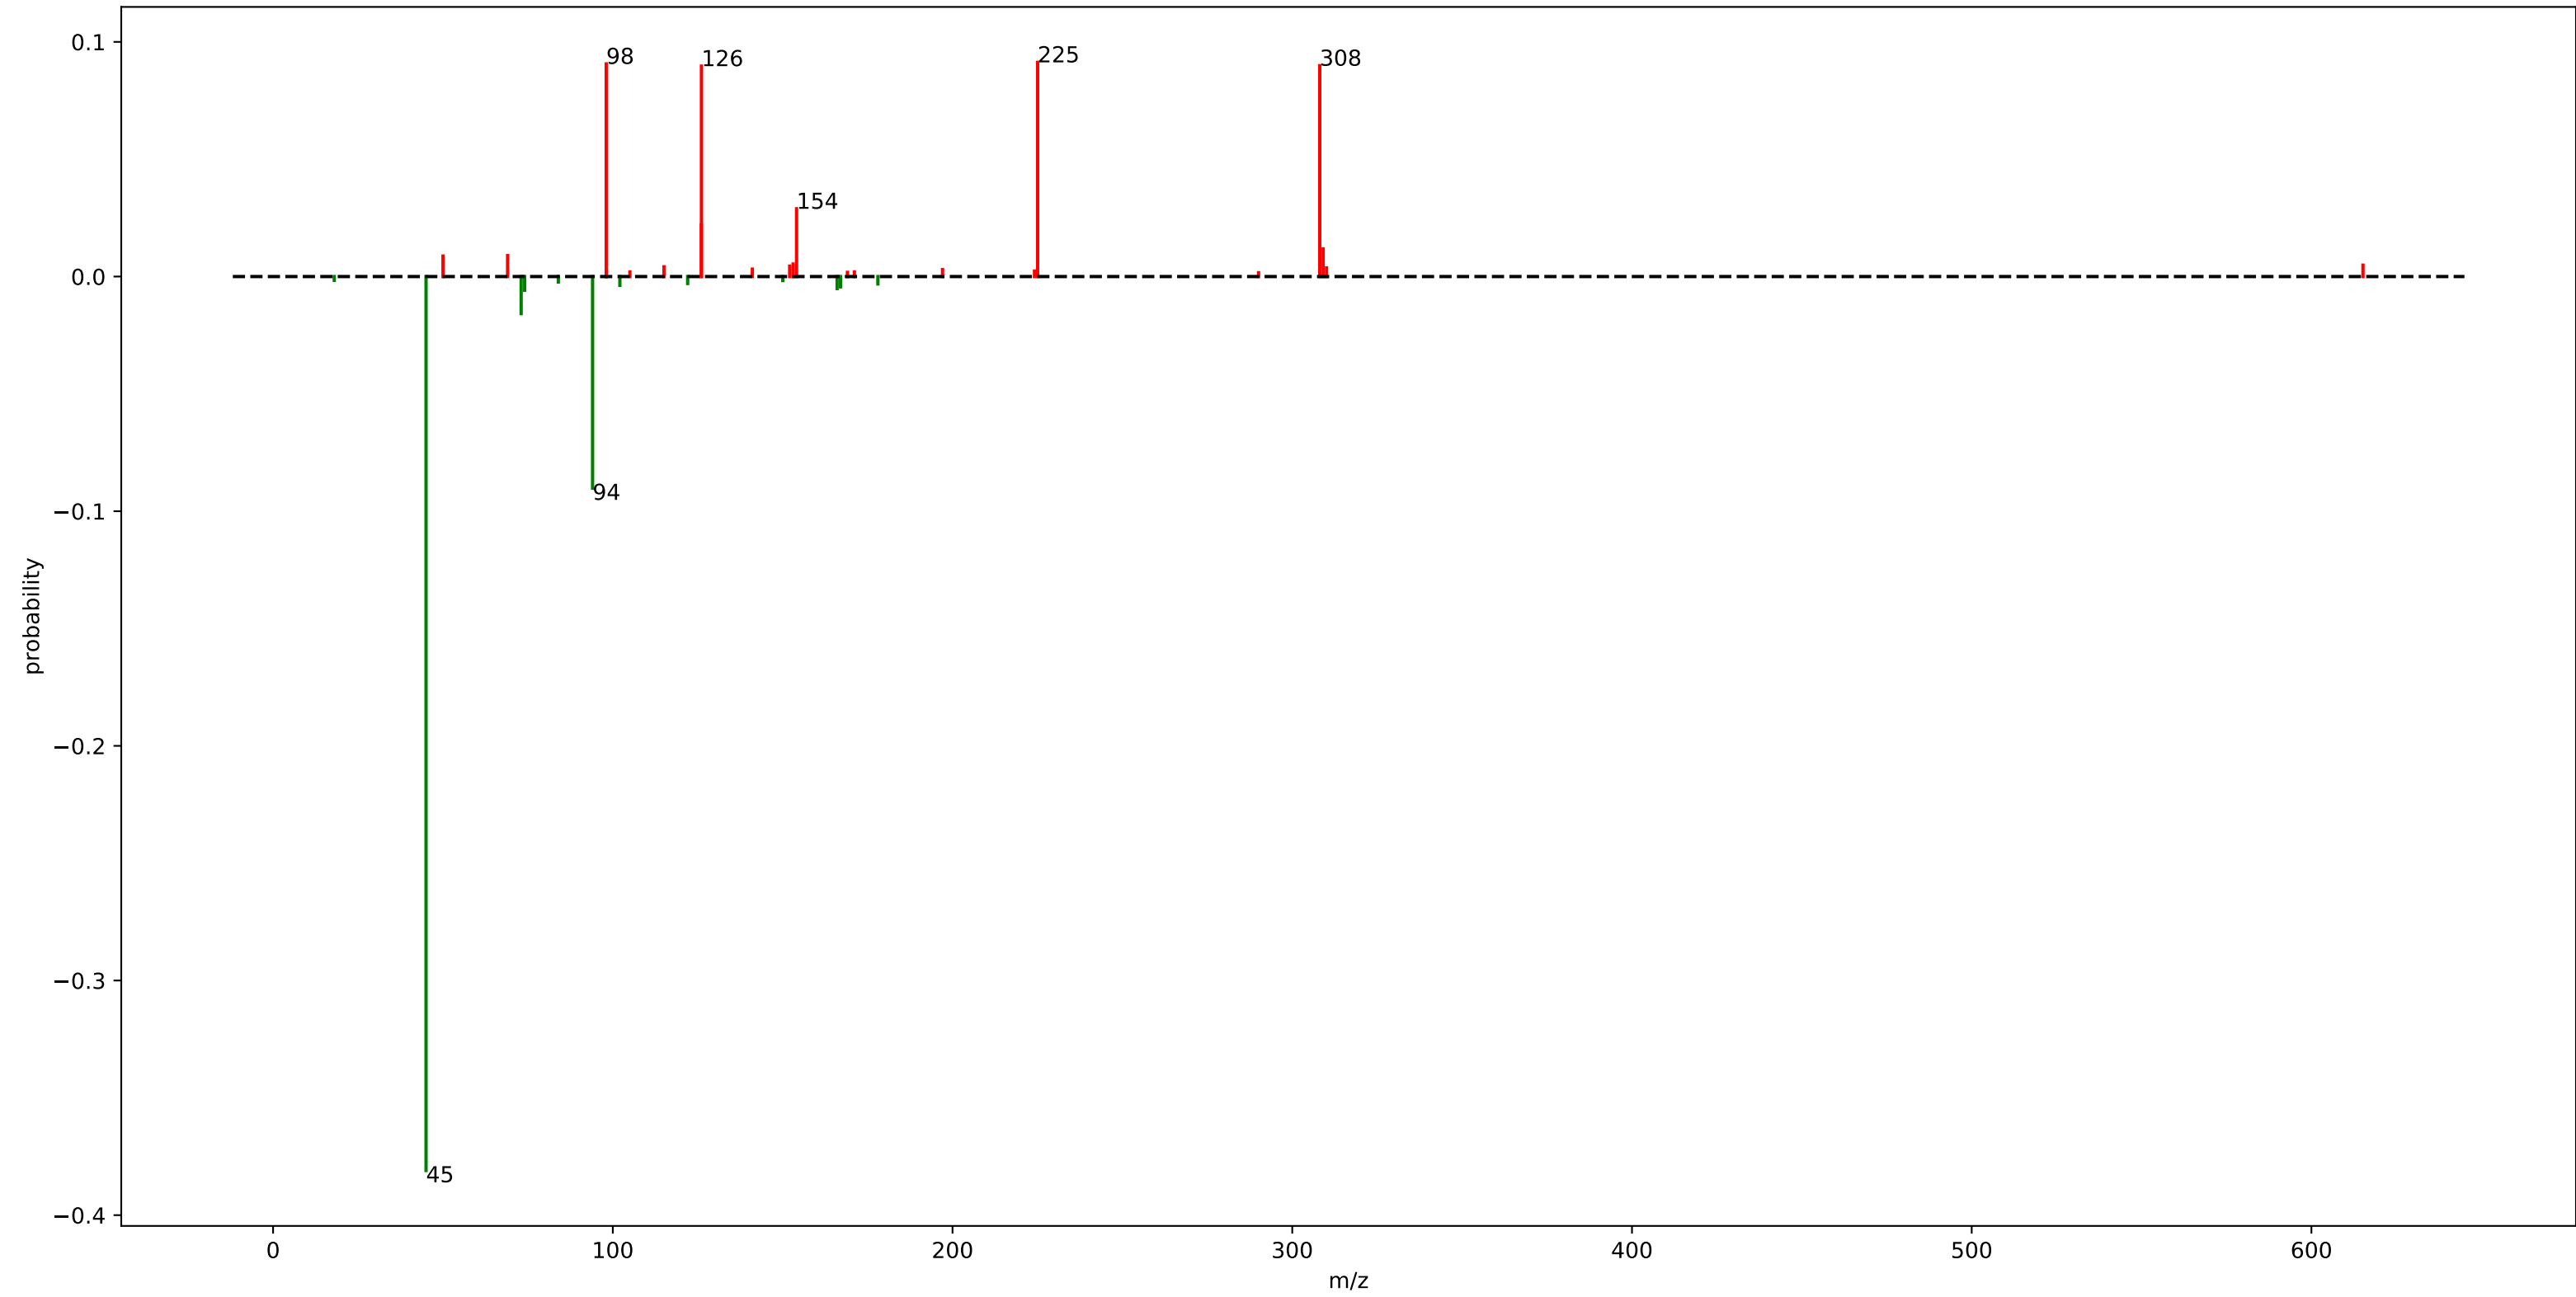

## mb\_motif\_195.m2m

|                   |        |
|-------------------|--------|
| loss_45.0225      | : 0.38 |
| fragment_225.0525 | : 0.09 |
| fragment_98.0625  | : 0.09 |
| loss_94.0425      | : 0.09 |
| fragment_308.0925 | : 0.09 |
| fragment_126.0925 | : 0.09 |
| fragment_154.0875 | : 0.03 |
| fragment_126.0575 | : 0.02 |
| loss_73.0175      | : 0.02 |
| fragment_309.0925 | : 0.01 |
| fragment_69.0325  | : 0.01 |
| fragment_50.0125  | : 0.01 |
| loss_74.0475      | : 0.01 |
| fragment_153.0675 | : 0.01 |
| loss_166.0275     | : 0.01 |

urine\_mass2motif\_291.m2m

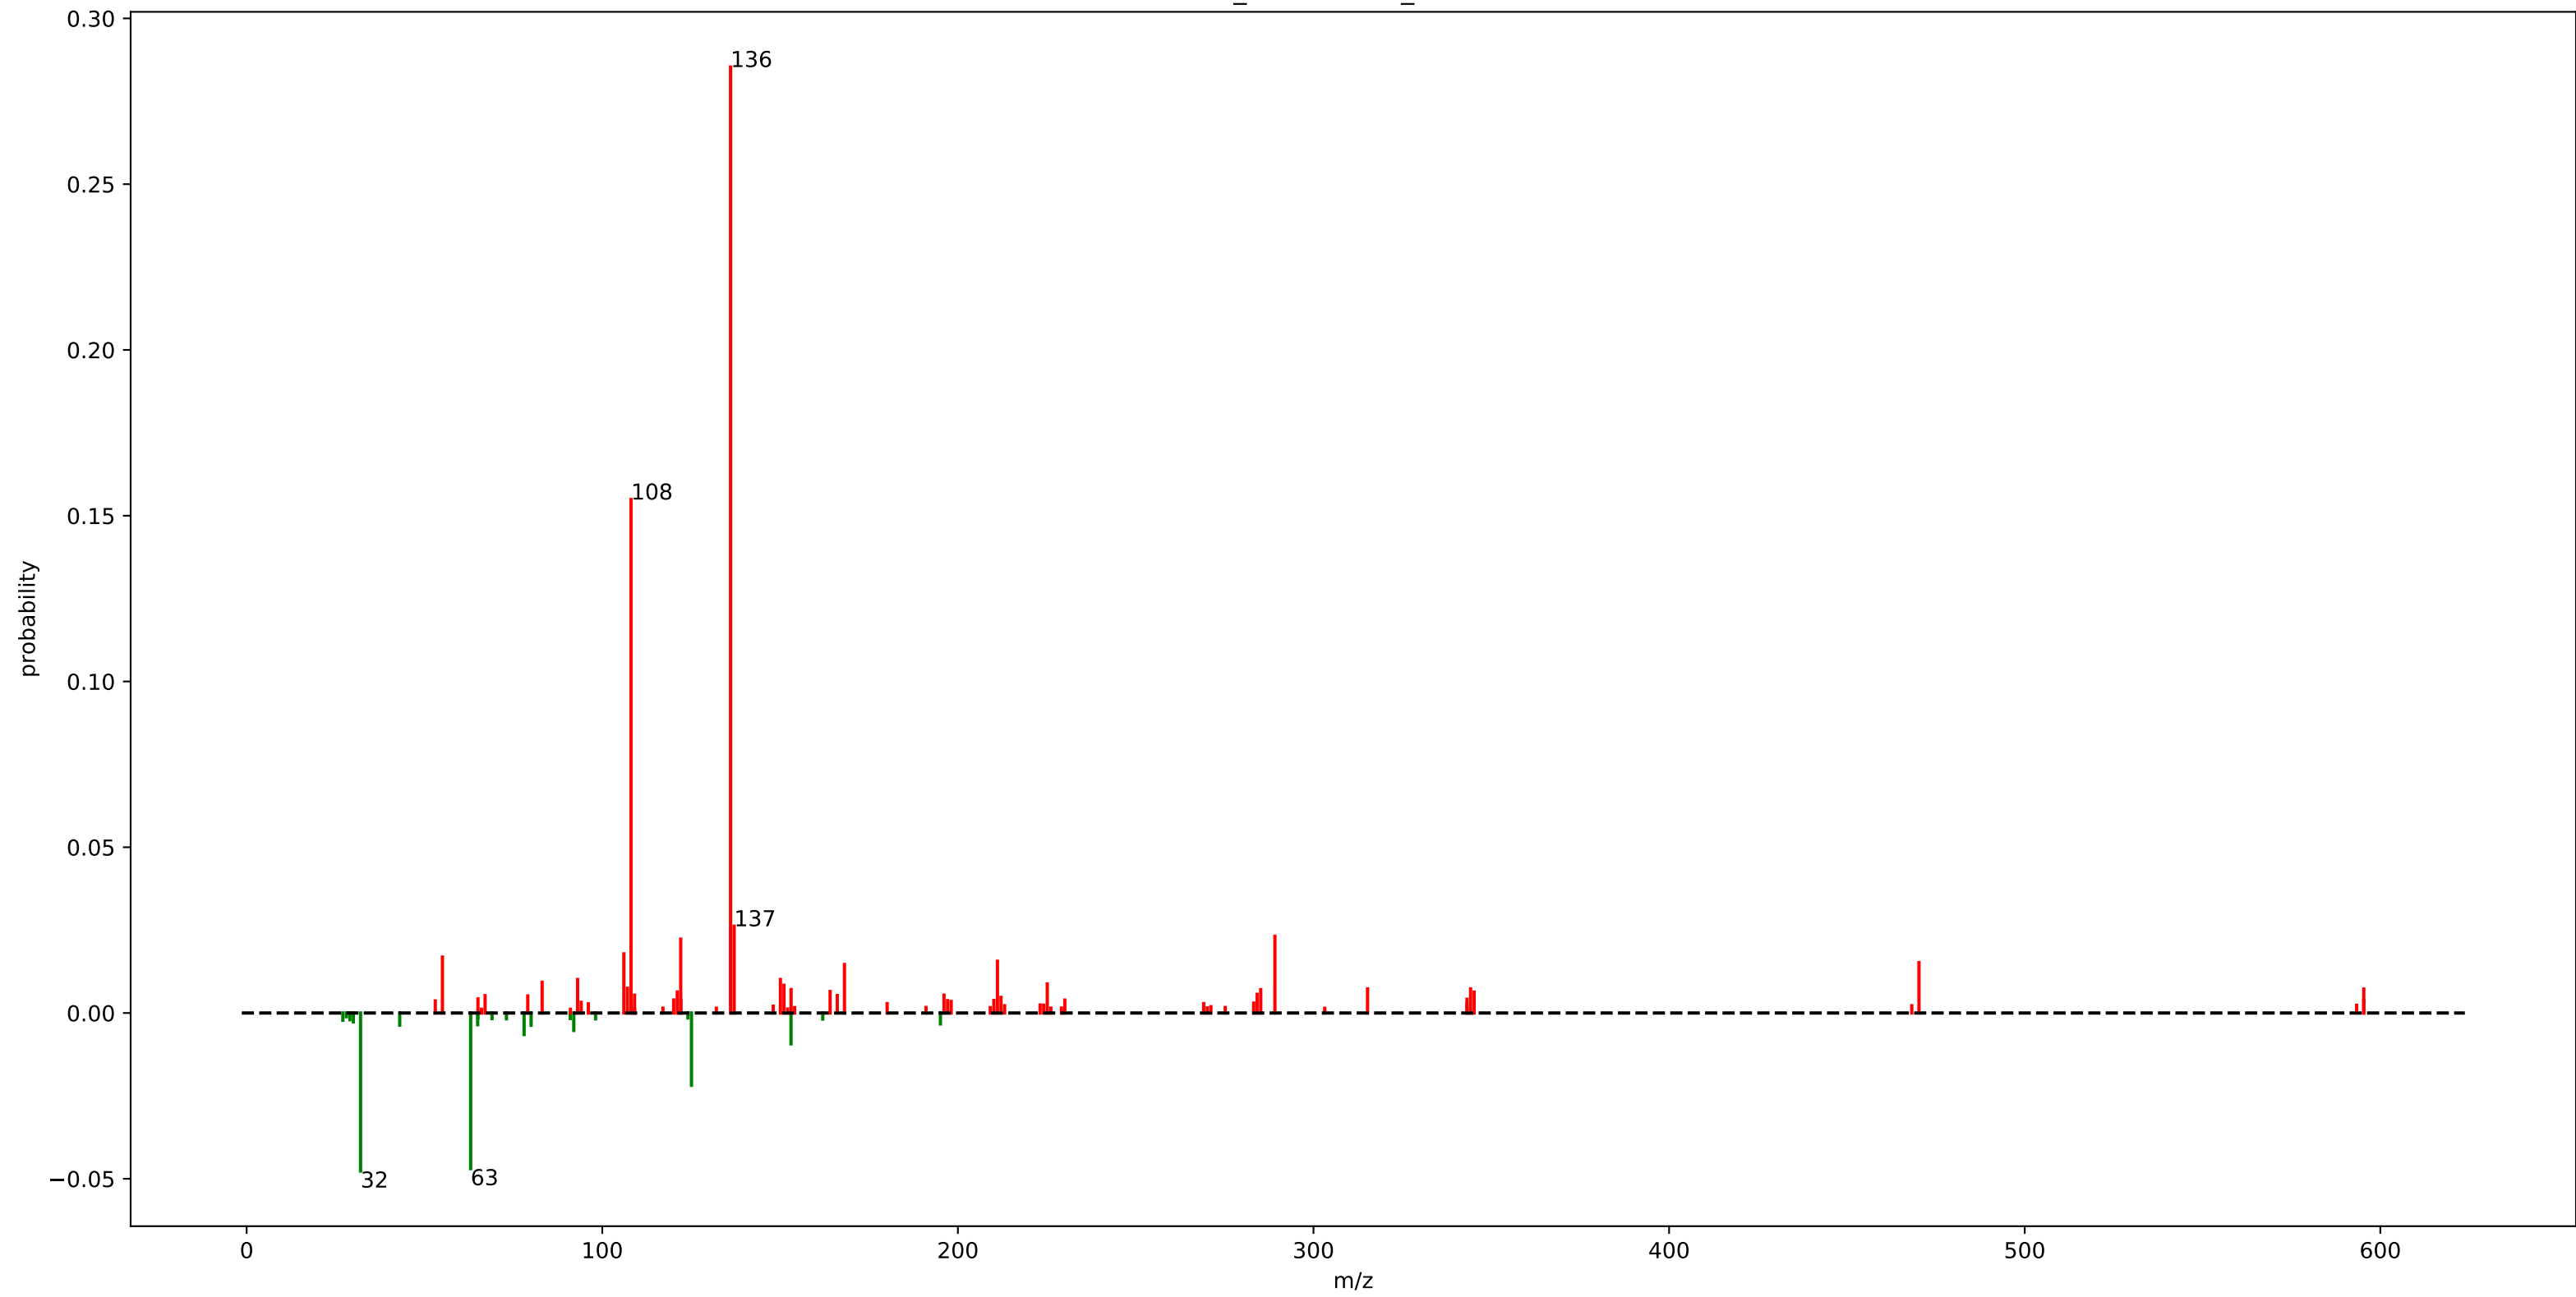

# urine\_mass2motif\_291.m2m

|                   |        |                   |        |
|-------------------|--------|-------------------|--------|
| fragment_136.0775 | : 0.29 | fragment_344.1725 | : 0.01 |
| fragment_108.0825 | : 0.15 | fragment_315.2025 | : 0.01 |
| loss_32.0275      | : 0.05 | fragment_595.3525 | : 0.01 |
| loss_62.9875      | : 0.05 | fragment_153.1025 | : 0.01 |
| fragment_137.0825 | : 0.03 | fragment_285.1625 | : 0.01 |
| fragment_289.1525 | : 0.02 | fragment_164.0725 | : 0.01 |
| fragment_122.0625 | : 0.02 | loss_78.0125      | : 0.01 |
| loss_125.0825     | : 0.02 | fragment_121.0875 | : 0.01 |
| fragment_106.0675 | : 0.02 | fragment_345.1775 | : 0.01 |
| fragment_55.0525  | : 0.02 | fragment_284.1375 | : 0.01 |
| fragment_211.1225 | : 0.02 | fragment_196.0975 | : 0.01 |
| fragment_470.2625 | : 0.02 | fragment_109.0875 | : 0.01 |
| fragment_168.1025 | : 0.01 | fragment_166.0875 | : 0.01 |
| fragment_93.0575  | : 0.01 | loss_91.9925      | : 0.01 |
| fragment_150.0925 | : 0.01 | fragment_67.0525  | : 0.01 |
| loss_153.0775     | : 0.01 | fragment_79.0525  | : 0.01 |
| fragment_83.0875  | : 0.01 |                   |        |
| fragment_225.1375 | : 0.01 |                   |        |
| fragment_151.0975 | : 0.01 |                   |        |
| fragment_107.0725 | : 0.01 |                   |        |



euphorbia\_motif\_491.m2m

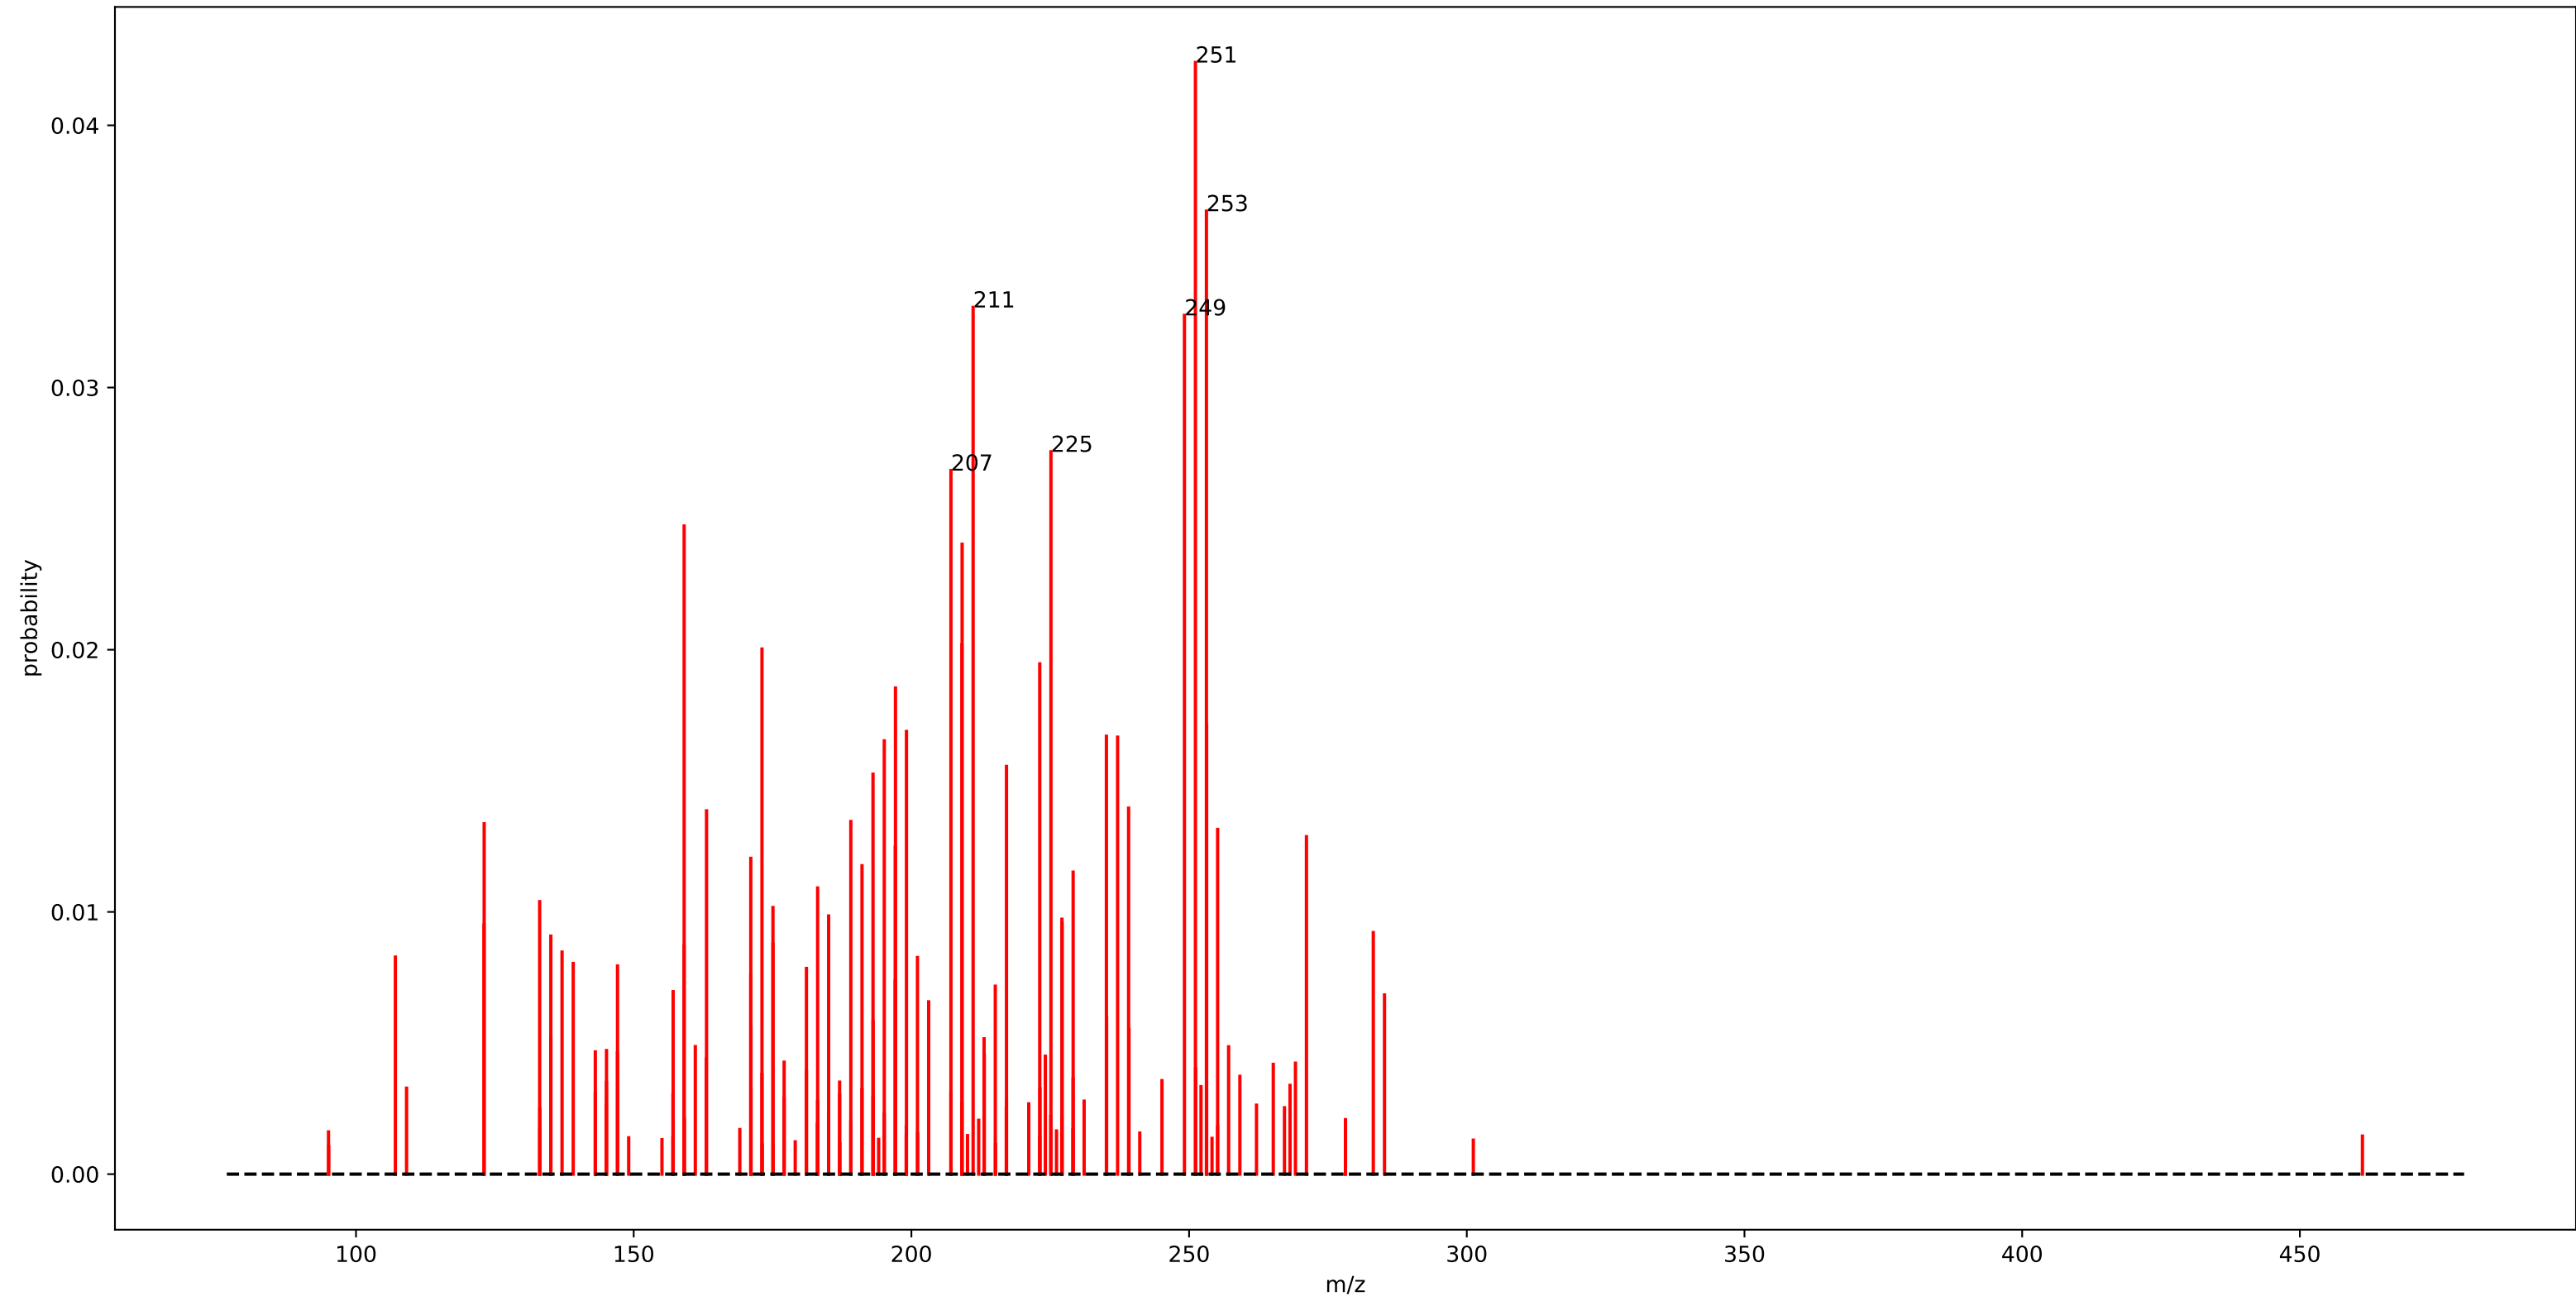

# euphorbia\_motif\_491.m2m

|                   |        |                   |        |                   |        |
|-------------------|--------|-------------------|--------|-------------------|--------|
| fragment_251.1425 | : 0.04 | fragment_163.1125 | : 0.01 | fragment_137.0975 | : 0.01 |
| fragment_253.1225 | : 0.04 | fragment_189.0925 | : 0.01 | fragment_107.0875 | : 0.01 |
| fragment_211.1125 | : 0.03 | fragment_123.0775 | : 0.01 | fragment_201.0925 | : 0.01 |
| fragment_249.1625 | : 0.03 | fragment_255.1375 | : 0.01 | fragment_139.1125 | : 0.01 |
| fragment_225.1275 | : 0.03 | fragment_271.1325 | : 0.01 | fragment_147.0825 | : 0.01 |
| fragment_207.1175 | : 0.03 | fragment_197.0975 | : 0.01 | fragment_181.1025 | : 0.01 |
| fragment_159.0825 | : 0.02 | fragment_171.0825 | : 0.01 | fragment_171.0775 | : 0.01 |
| fragment_209.1325 | : 0.02 | fragment_191.1075 | : 0.01 | fragment_197.0925 | : 0.01 |
| fragment_209.0975 | : 0.02 | fragment_229.1225 | : 0.01 | fragment_215.1075 | : 0.01 |
| fragment_173.0975 | : 0.02 | fragment_183.1175 | : 0.01 | fragment_157.1025 | : 0.01 |
| fragment_223.1125 | : 0.02 | fragment_133.0675 | : 0.01 | fragment_285.1875 | : 0.01 |
| fragment_197.1325 | : 0.02 | fragment_175.0725 | : 0.01 | fragment_203.1075 | : 0.01 |
| fragment_253.1575 | : 0.02 | fragment_185.0975 | : 0.01 | fragment_235.1475 | : 0.01 |
| fragment_199.1125 | : 0.02 | fragment_227.1075 | : 0.01 | fragment_193.1025 | : 0.01 |
| fragment_235.1125 | : 0.02 | fragment_227.1425 | : 0.01 | fragment_171.1125 | : 0.01 |
| fragment_237.1275 | : 0.02 | fragment_123.0425 | : 0.01 | fragment_239.1775 | : 0.01 |
| fragment_195.1175 | : 0.02 | fragment_283.1675 | : 0.01 | fragment_135.0825 | : 0.01 |
| fragment_217.1225 | : 0.02 | fragment_135.0775 | : 0.01 | fragment_213.0925 | : 0.01 |
| fragment_193.0875 | : 0.02 | fragment_175.0775 | : 0.01 |                   |        |
| fragment_239.1075 | : 0.01 | fragment_159.0775 | : 0.01 |                   |        |

euphorbia\_motif\_377.m2m

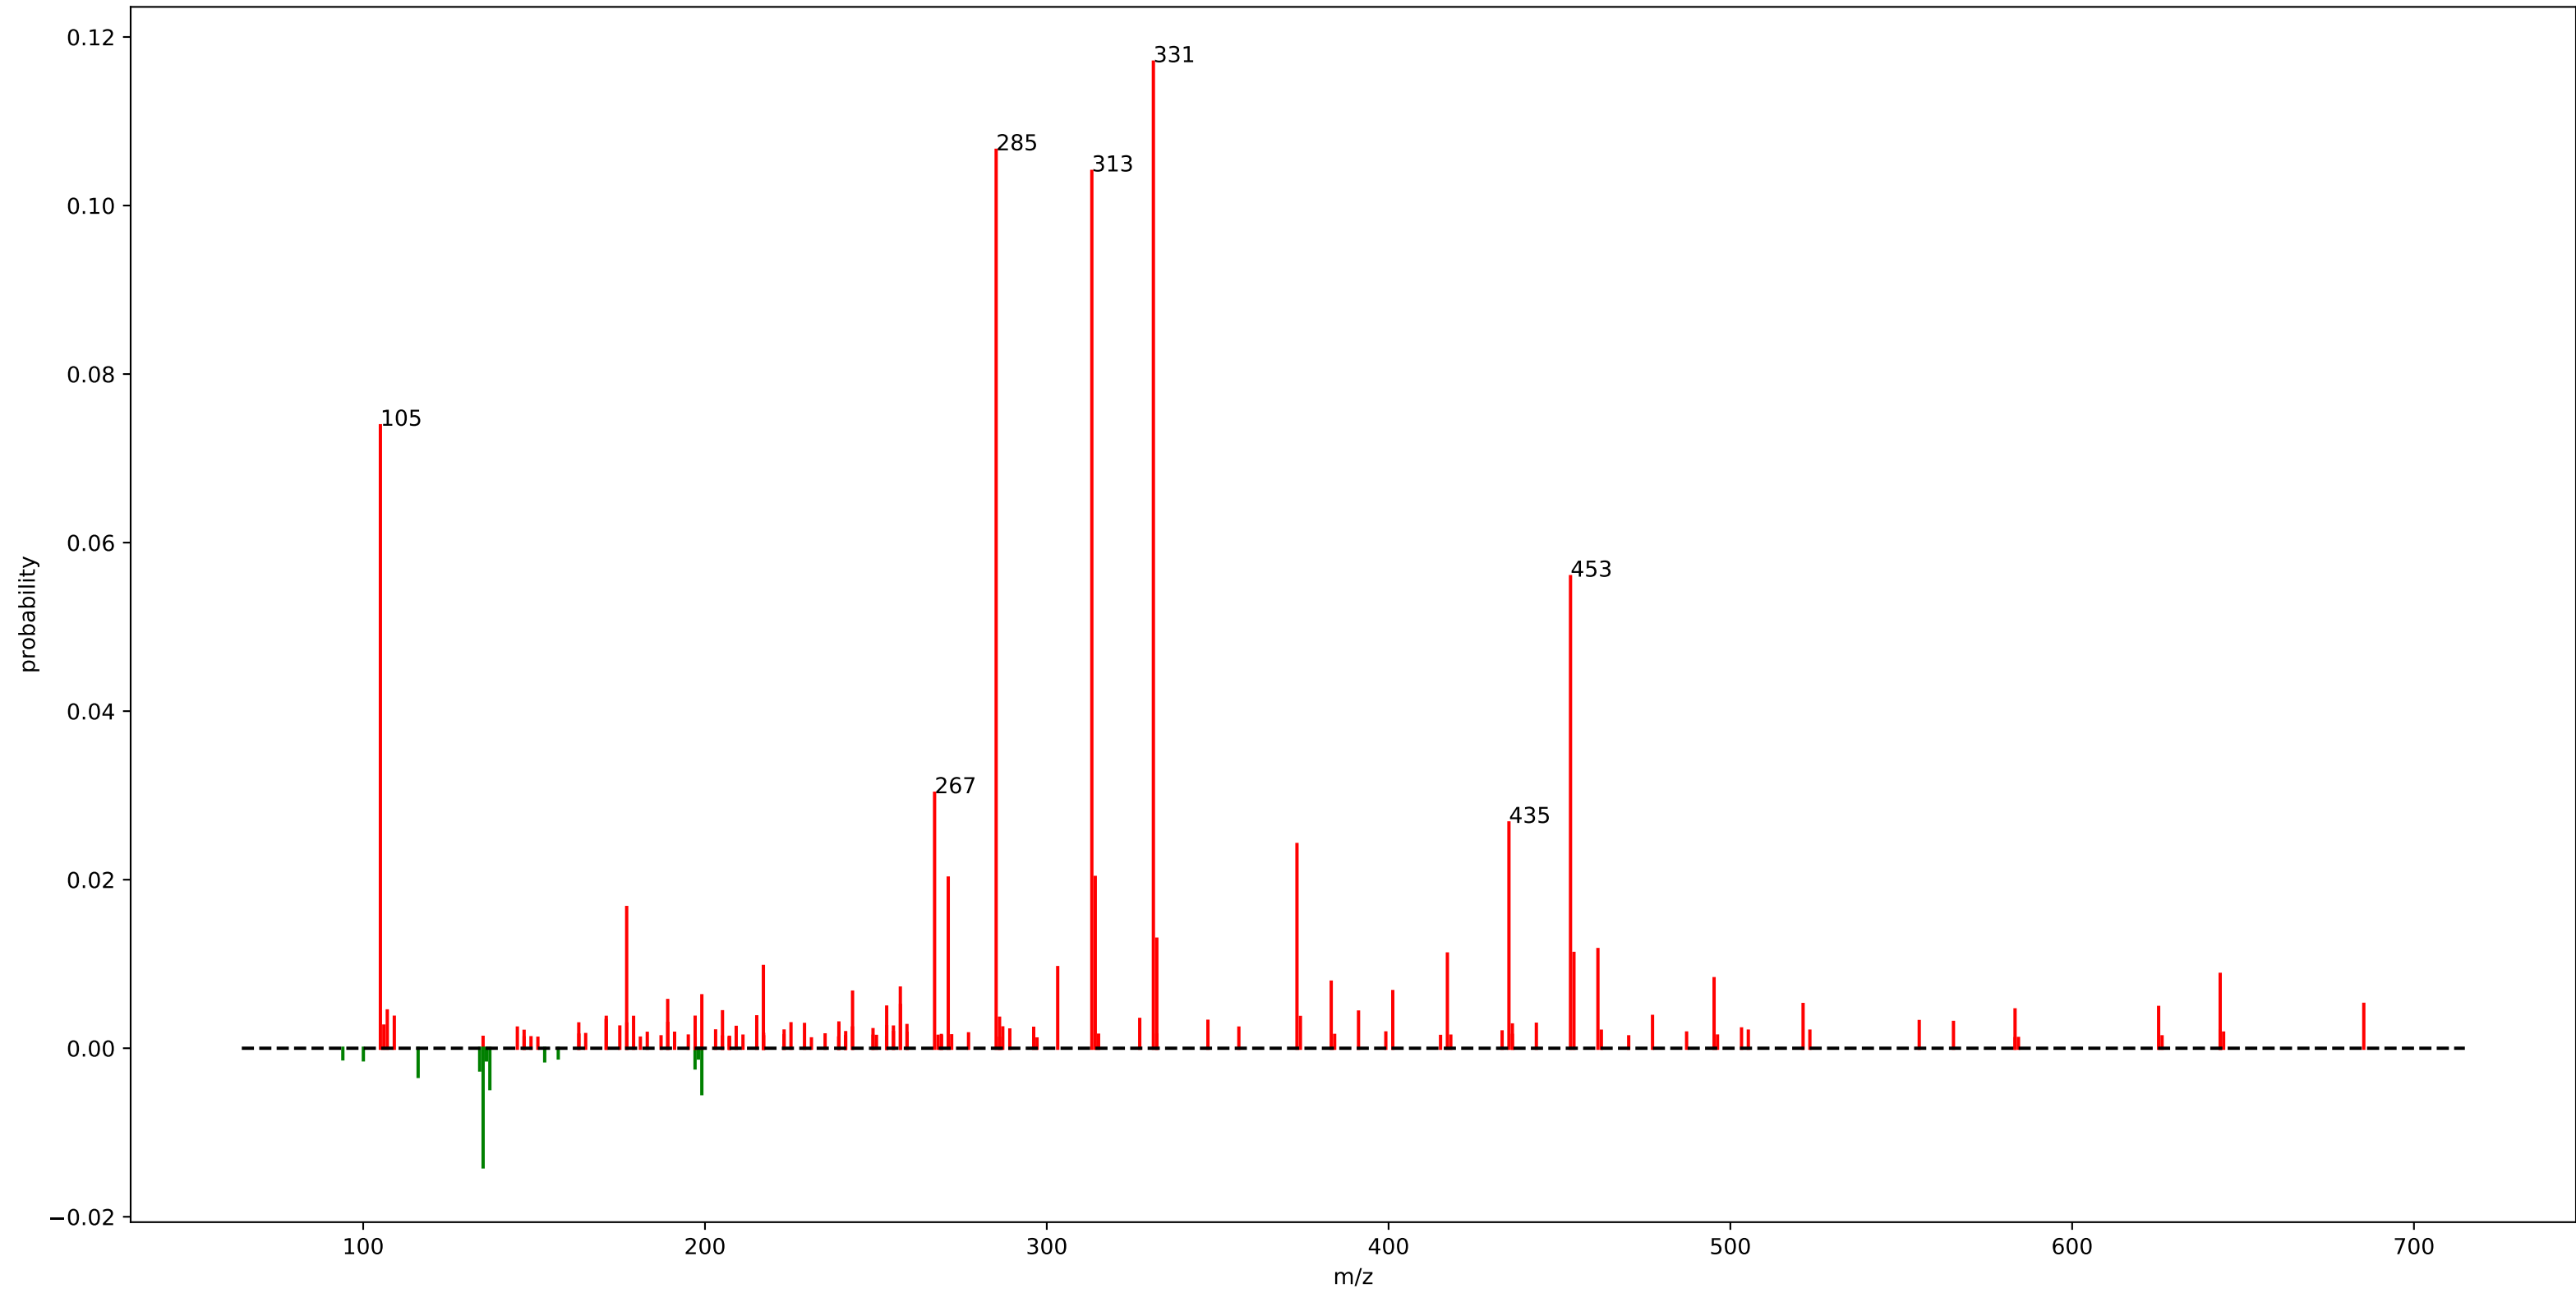

# euphorbia\_motif\_377.m2m

|                   |        |                   |        |
|-------------------|--------|-------------------|--------|
| fragment_331.1925 | : 0.12 | fragment_383.2225 | : 0.01 |
| fragment_285.1875 | : 0.11 | fragment_257.1525 | : 0.01 |
| fragment_313.1825 | : 0.10 | fragment_401.2325 | : 0.01 |
| fragment_105.0325 | : 0.07 | fragment_243.1775 | : 0.01 |
| fragment_453.2325 | : 0.06 | fragment_199.0775 | : 0.01 |
| fragment_267.1775 | : 0.03 | fragment_189.0925 | : 0.01 |
| fragment_435.2175 | : 0.03 | loss_199.0775     | : 0.01 |
| fragment_373.2025 | : 0.02 | fragment_685.3275 | : 0.01 |
| fragment_314.1875 | : 0.02 | fragment_521.2775 | : 0.01 |
| fragment_271.1725 | : 0.02 | fragment_257.1925 | : 0.01 |
| fragment_177.0925 | : 0.02 |                   |        |
| loss_135.0875     | : 0.01 |                   |        |
| fragment_332.1975 | : 0.01 |                   |        |
| fragment_461.2525 | : 0.01 |                   |        |
| fragment_454.2325 | : 0.01 |                   |        |
| fragment_417.2075 | : 0.01 |                   |        |
| fragment_217.0875 | : 0.01 |                   |        |
| fragment_303.1975 | : 0.01 |                   |        |
| fragment_643.3125 | : 0.01 |                   |        |
| fragment_495.2375 | : 0.01 |                   |        |

euphorbia\_motif\_322.m2m

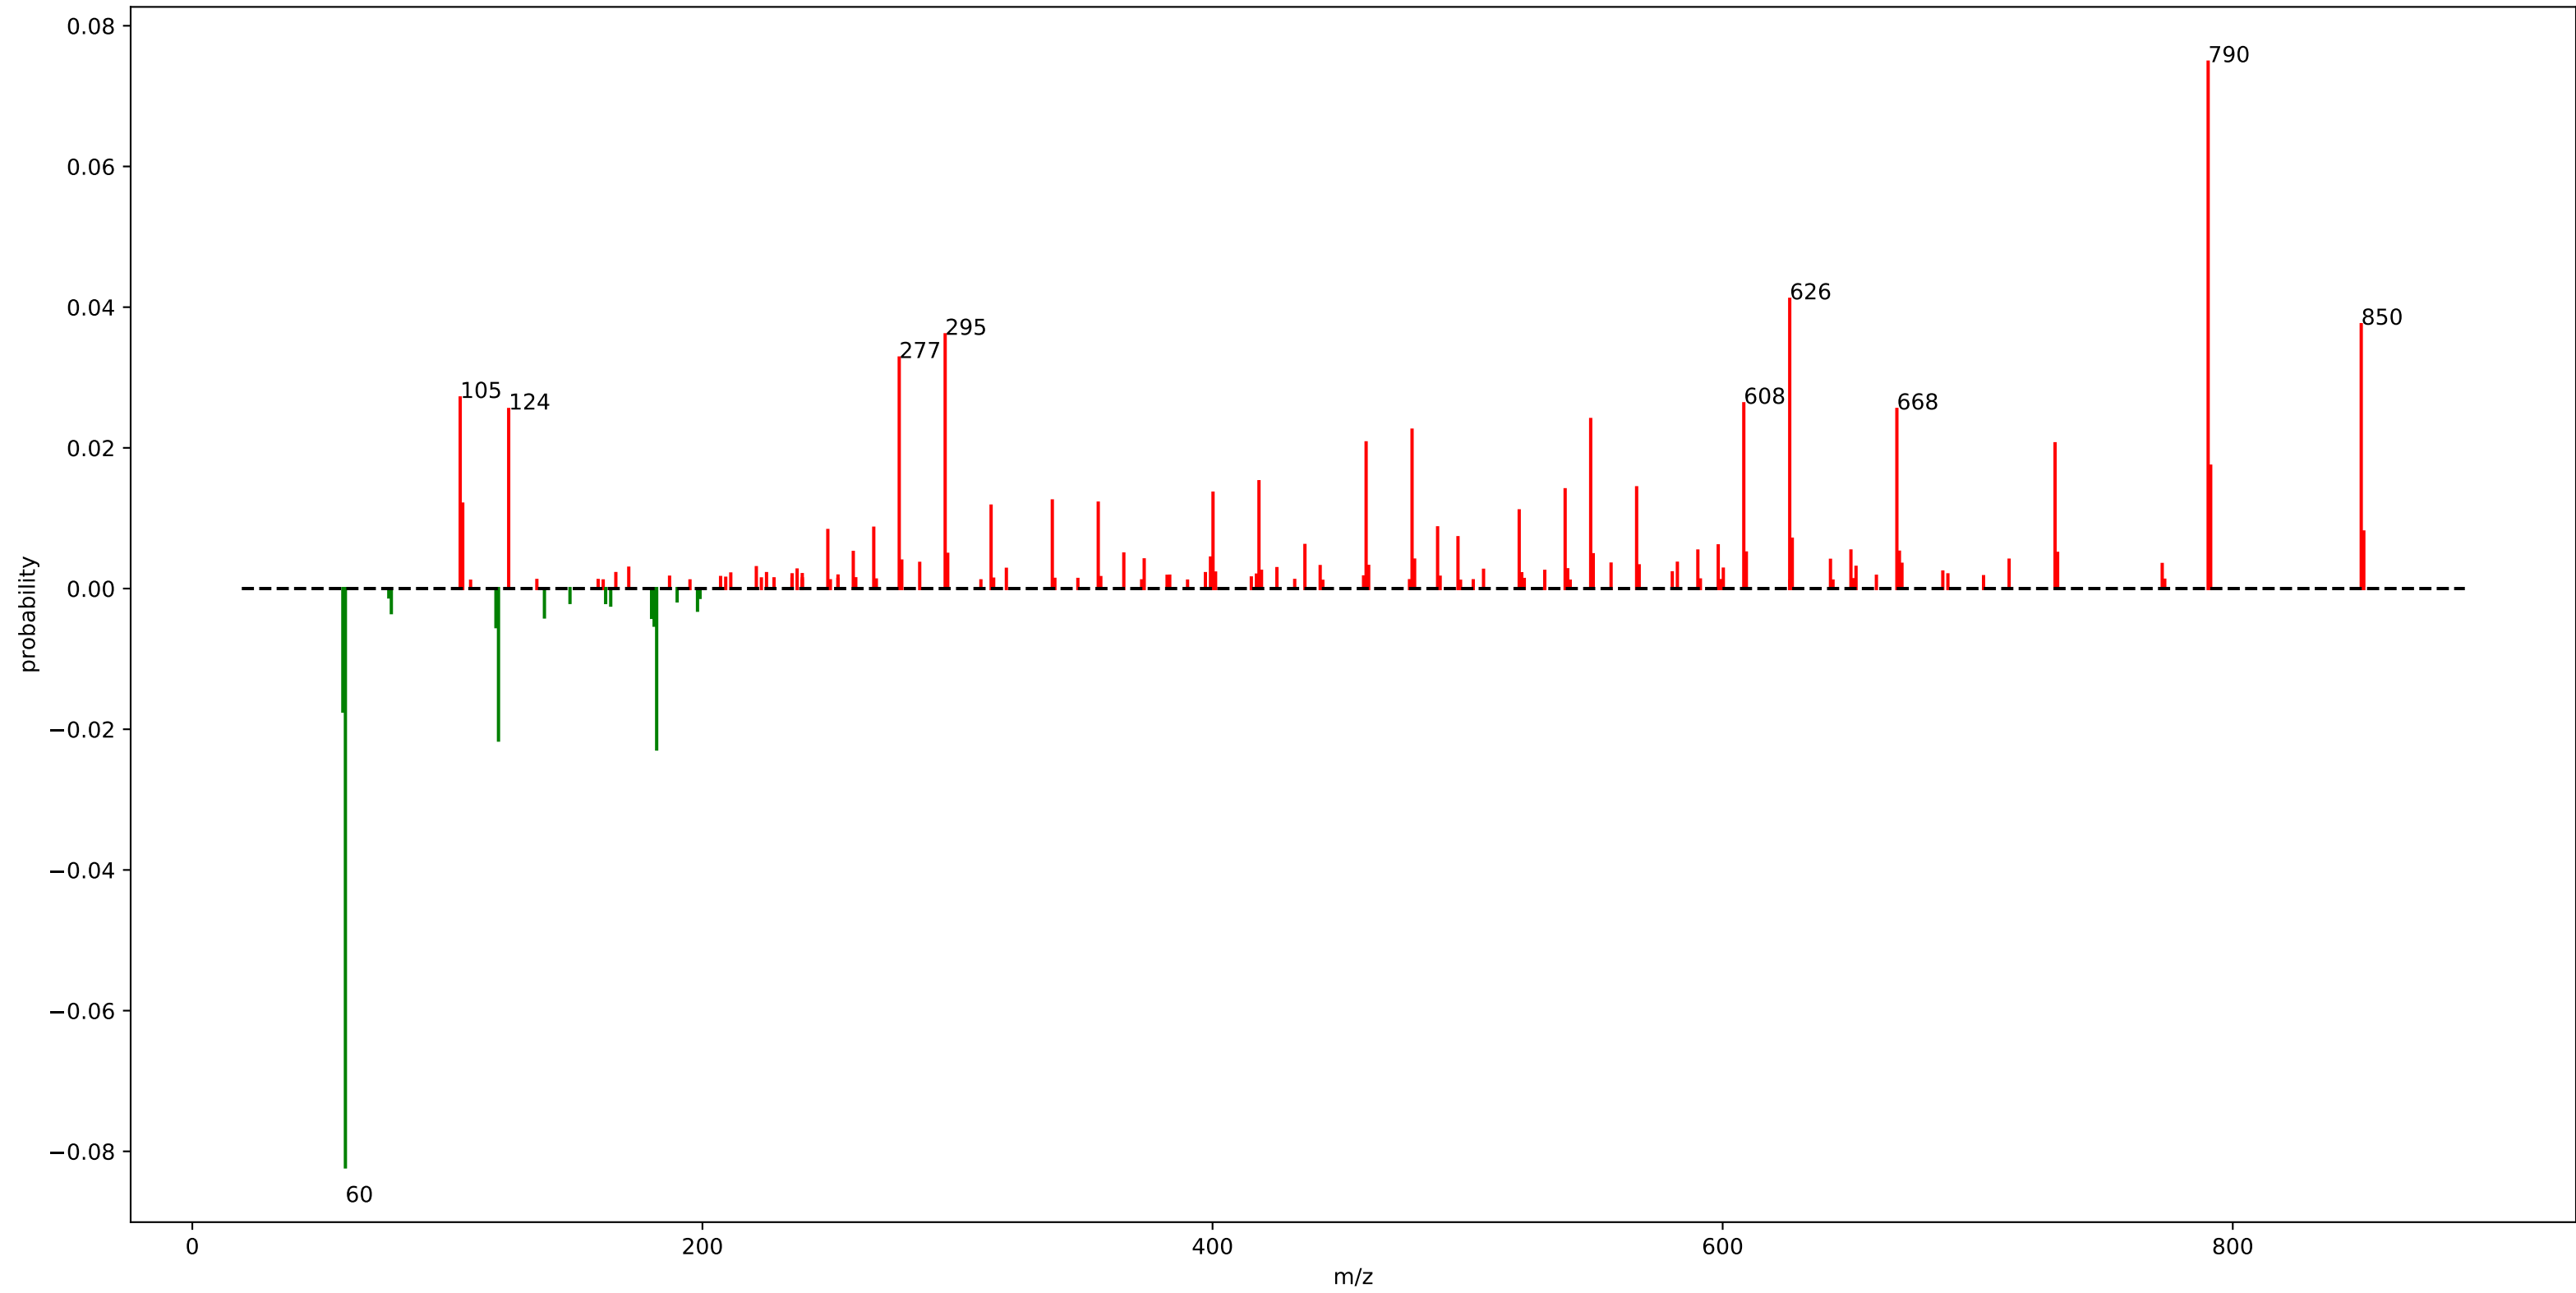

# euphorbia\_motif\_322.m2m

|                   |        |                   |        |                   |        |
|-------------------|--------|-------------------|--------|-------------------|--------|
| loss_60.0175      | : 0.08 | fragment_538.2425 | : 0.01 | fragment_259.1475 | : 0.01 |
| fragment_790.3475 | : 0.07 | fragment_400.1875 | : 0.01 | fragment_609.2875 | : 0.01 |
| fragment_626.2975 | : 0.04 | fragment_337.1775 | : 0.01 | fragment_731.3275 | : 0.01 |
| fragment_850.3675 | : 0.04 | fragment_355.1875 | : 0.01 |                   |        |
| fragment_295.1675 | : 0.04 | fragment_106.0275 | : 0.01 |                   |        |
| fragment_277.1575 | : 0.03 | fragment_313.1775 | : 0.01 |                   |        |
| fragment_105.0325 | : 0.03 | fragment_520.2325 | : 0.01 |                   |        |
| fragment_608.2875 | : 0.03 | fragment_488.2425 | : 0.01 |                   |        |
| fragment_668.3075 | : 0.03 | fragment_267.1725 | : 0.01 |                   |        |
| fragment_124.0375 | : 0.03 | fragment_249.1625 | : 0.01 |                   |        |
| fragment_548.2625 | : 0.02 | fragment_851.3725 | : 0.01 |                   |        |
| loss_182.0575     | : 0.02 | fragment_496.2325 | : 0.01 |                   |        |
| fragment_478.2225 | : 0.02 | fragment_627.2975 | : 0.01 |                   |        |
| loss_120.0425     | : 0.02 | fragment_436.2125 | : 0.01 |                   |        |
| fragment_460.2125 | : 0.02 | fragment_598.2625 | : 0.01 |                   |        |
| fragment_730.3275 | : 0.02 | loss_119.0375     | : 0.01 |                   |        |
| loss_59.0175      | : 0.02 | fragment_650.2925 | : 0.01 |                   |        |
| fragment_791.3475 | : 0.02 | fragment_590.2775 | : 0.01 |                   |        |
| fragment_418.2025 | : 0.02 | loss_181.0575     | : 0.01 |                   |        |
| fragment_566.2725 | : 0.01 | fragment_669.3075 | : 0.01 |                   |        |

rhabdus\_motif\_53.m2m

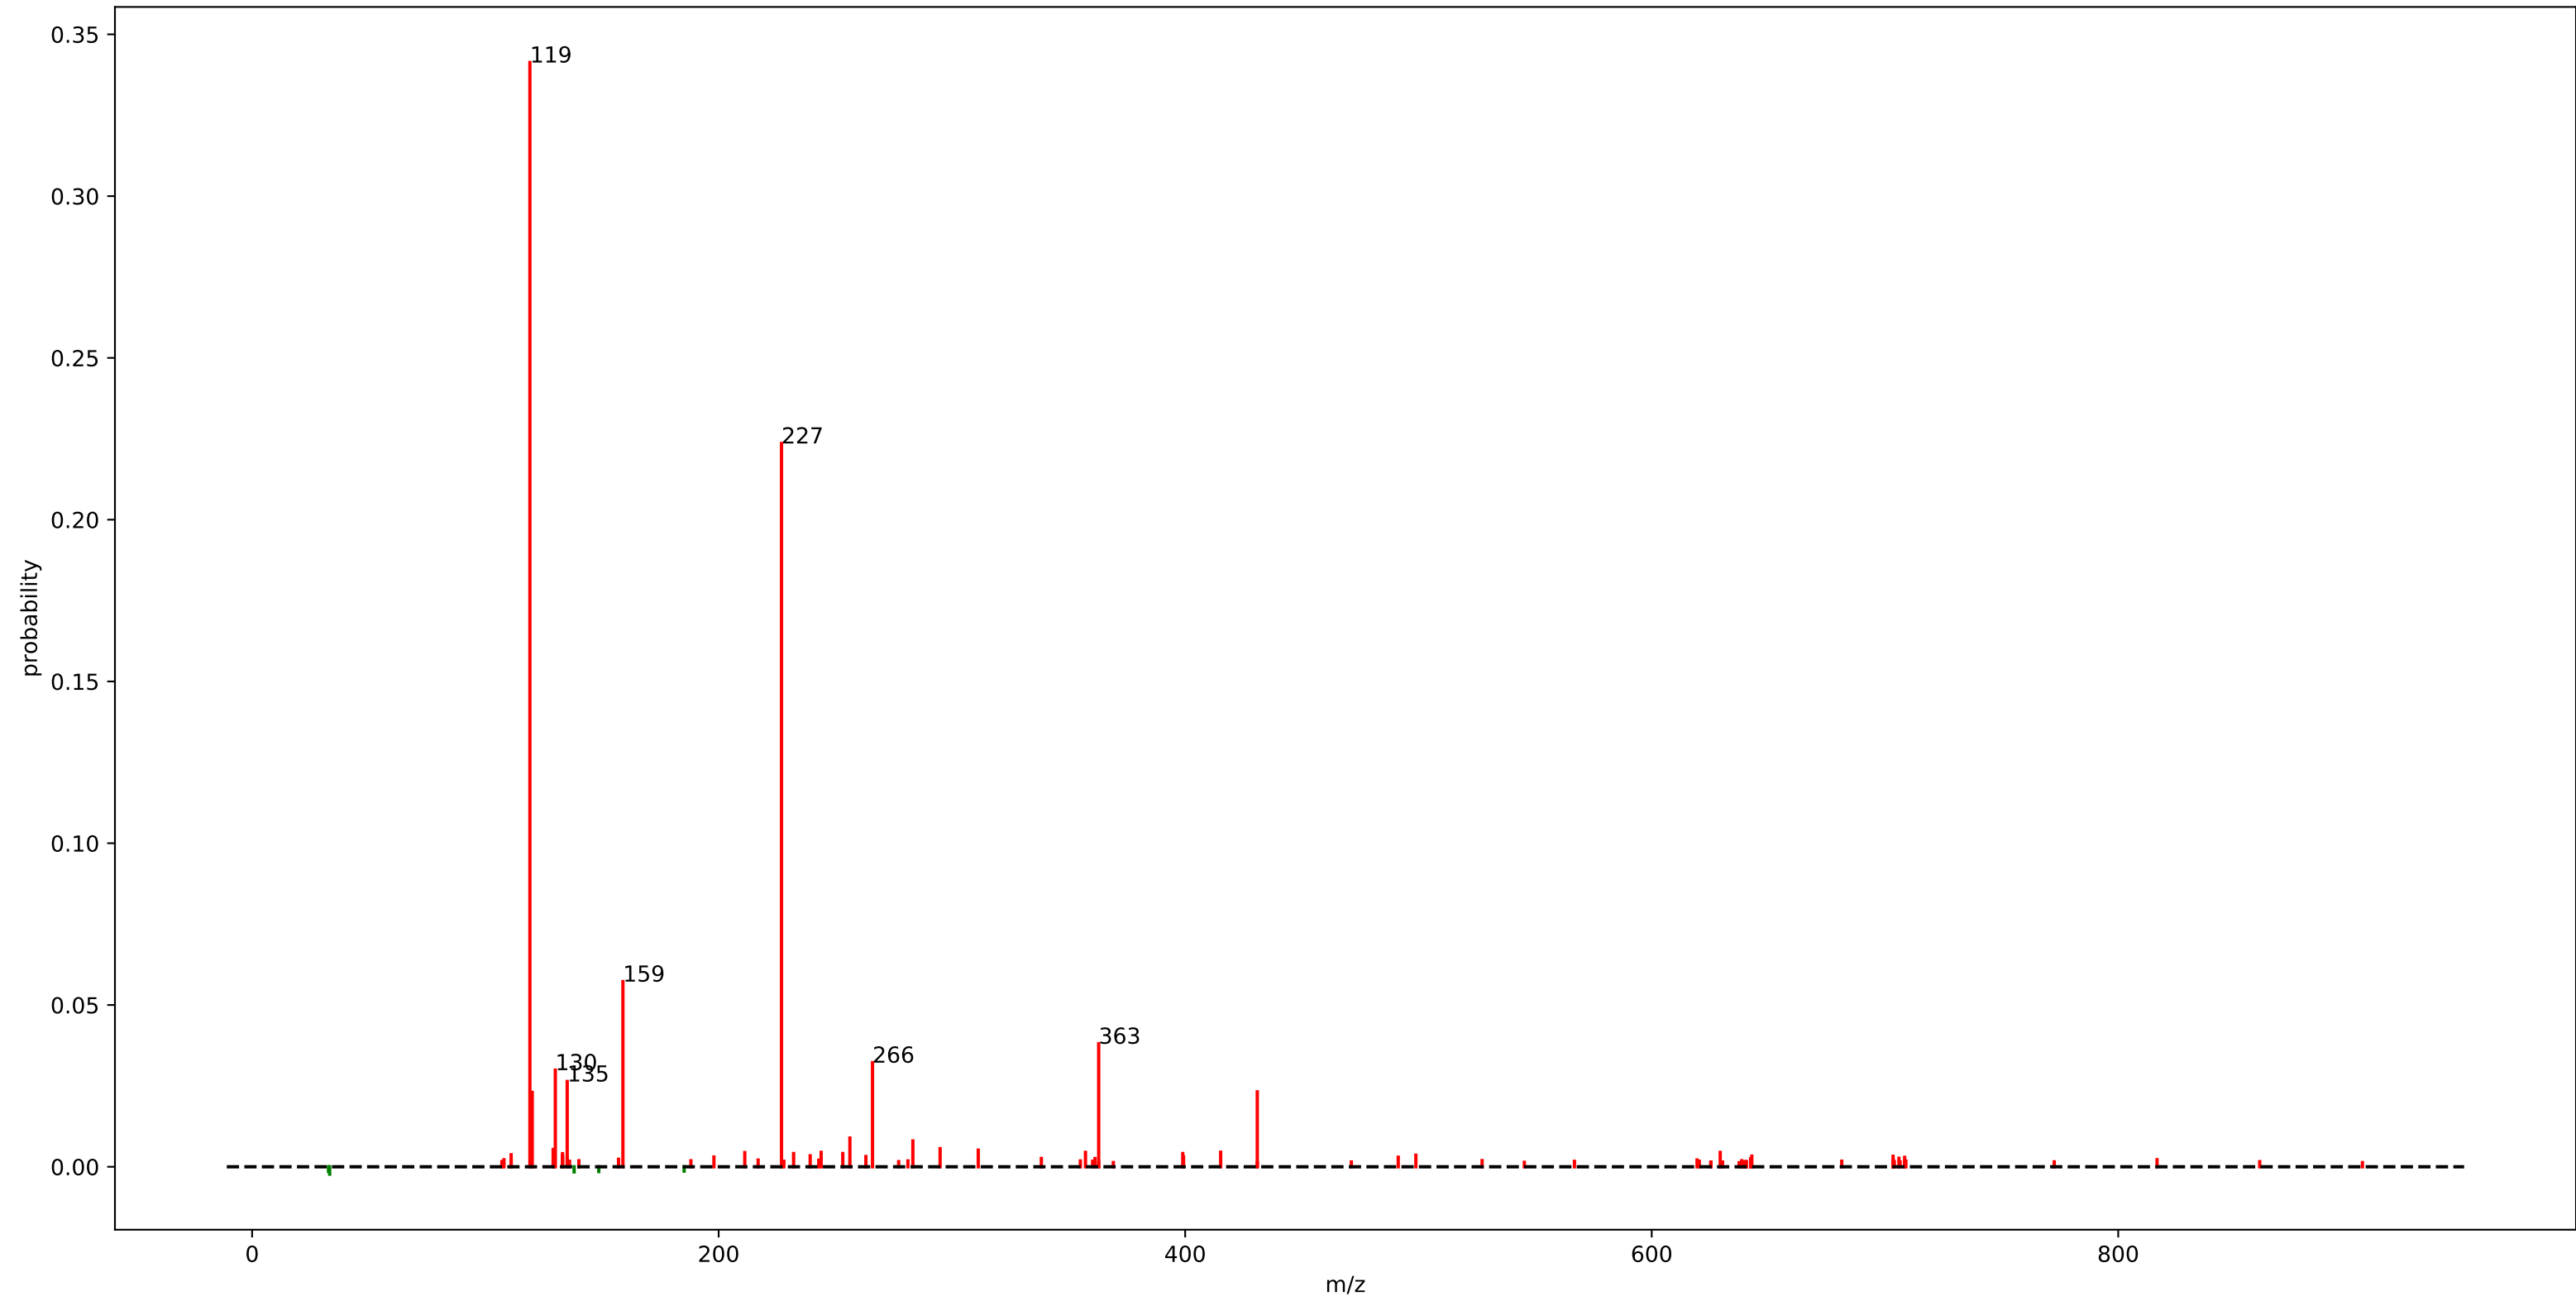

## rhabdus\_motif\_53.m2m

|                   |        |
|-------------------|--------|
| fragment_119.0825 | : 0.34 |
| fragment_226.9525 | : 0.22 |
| fragment_158.9625 | : 0.06 |
| fragment_362.9275 | : 0.04 |
| fragment_265.9625 | : 0.03 |
| fragment_129.9875 | : 0.03 |
| fragment_135.0775 | : 0.03 |
| fragment_430.9125 | : 0.02 |
| fragment_120.0875 | : 0.02 |
| fragment_256.2625 | : 0.01 |
| fragment_283.2625 | : 0.01 |
| fragment_294.9375 | : 0.01 |
| fragment_129.0525 | : 0.01 |
| fragment_311.2925 | : 0.01 |



rhabdus\_motif\_118.m2m

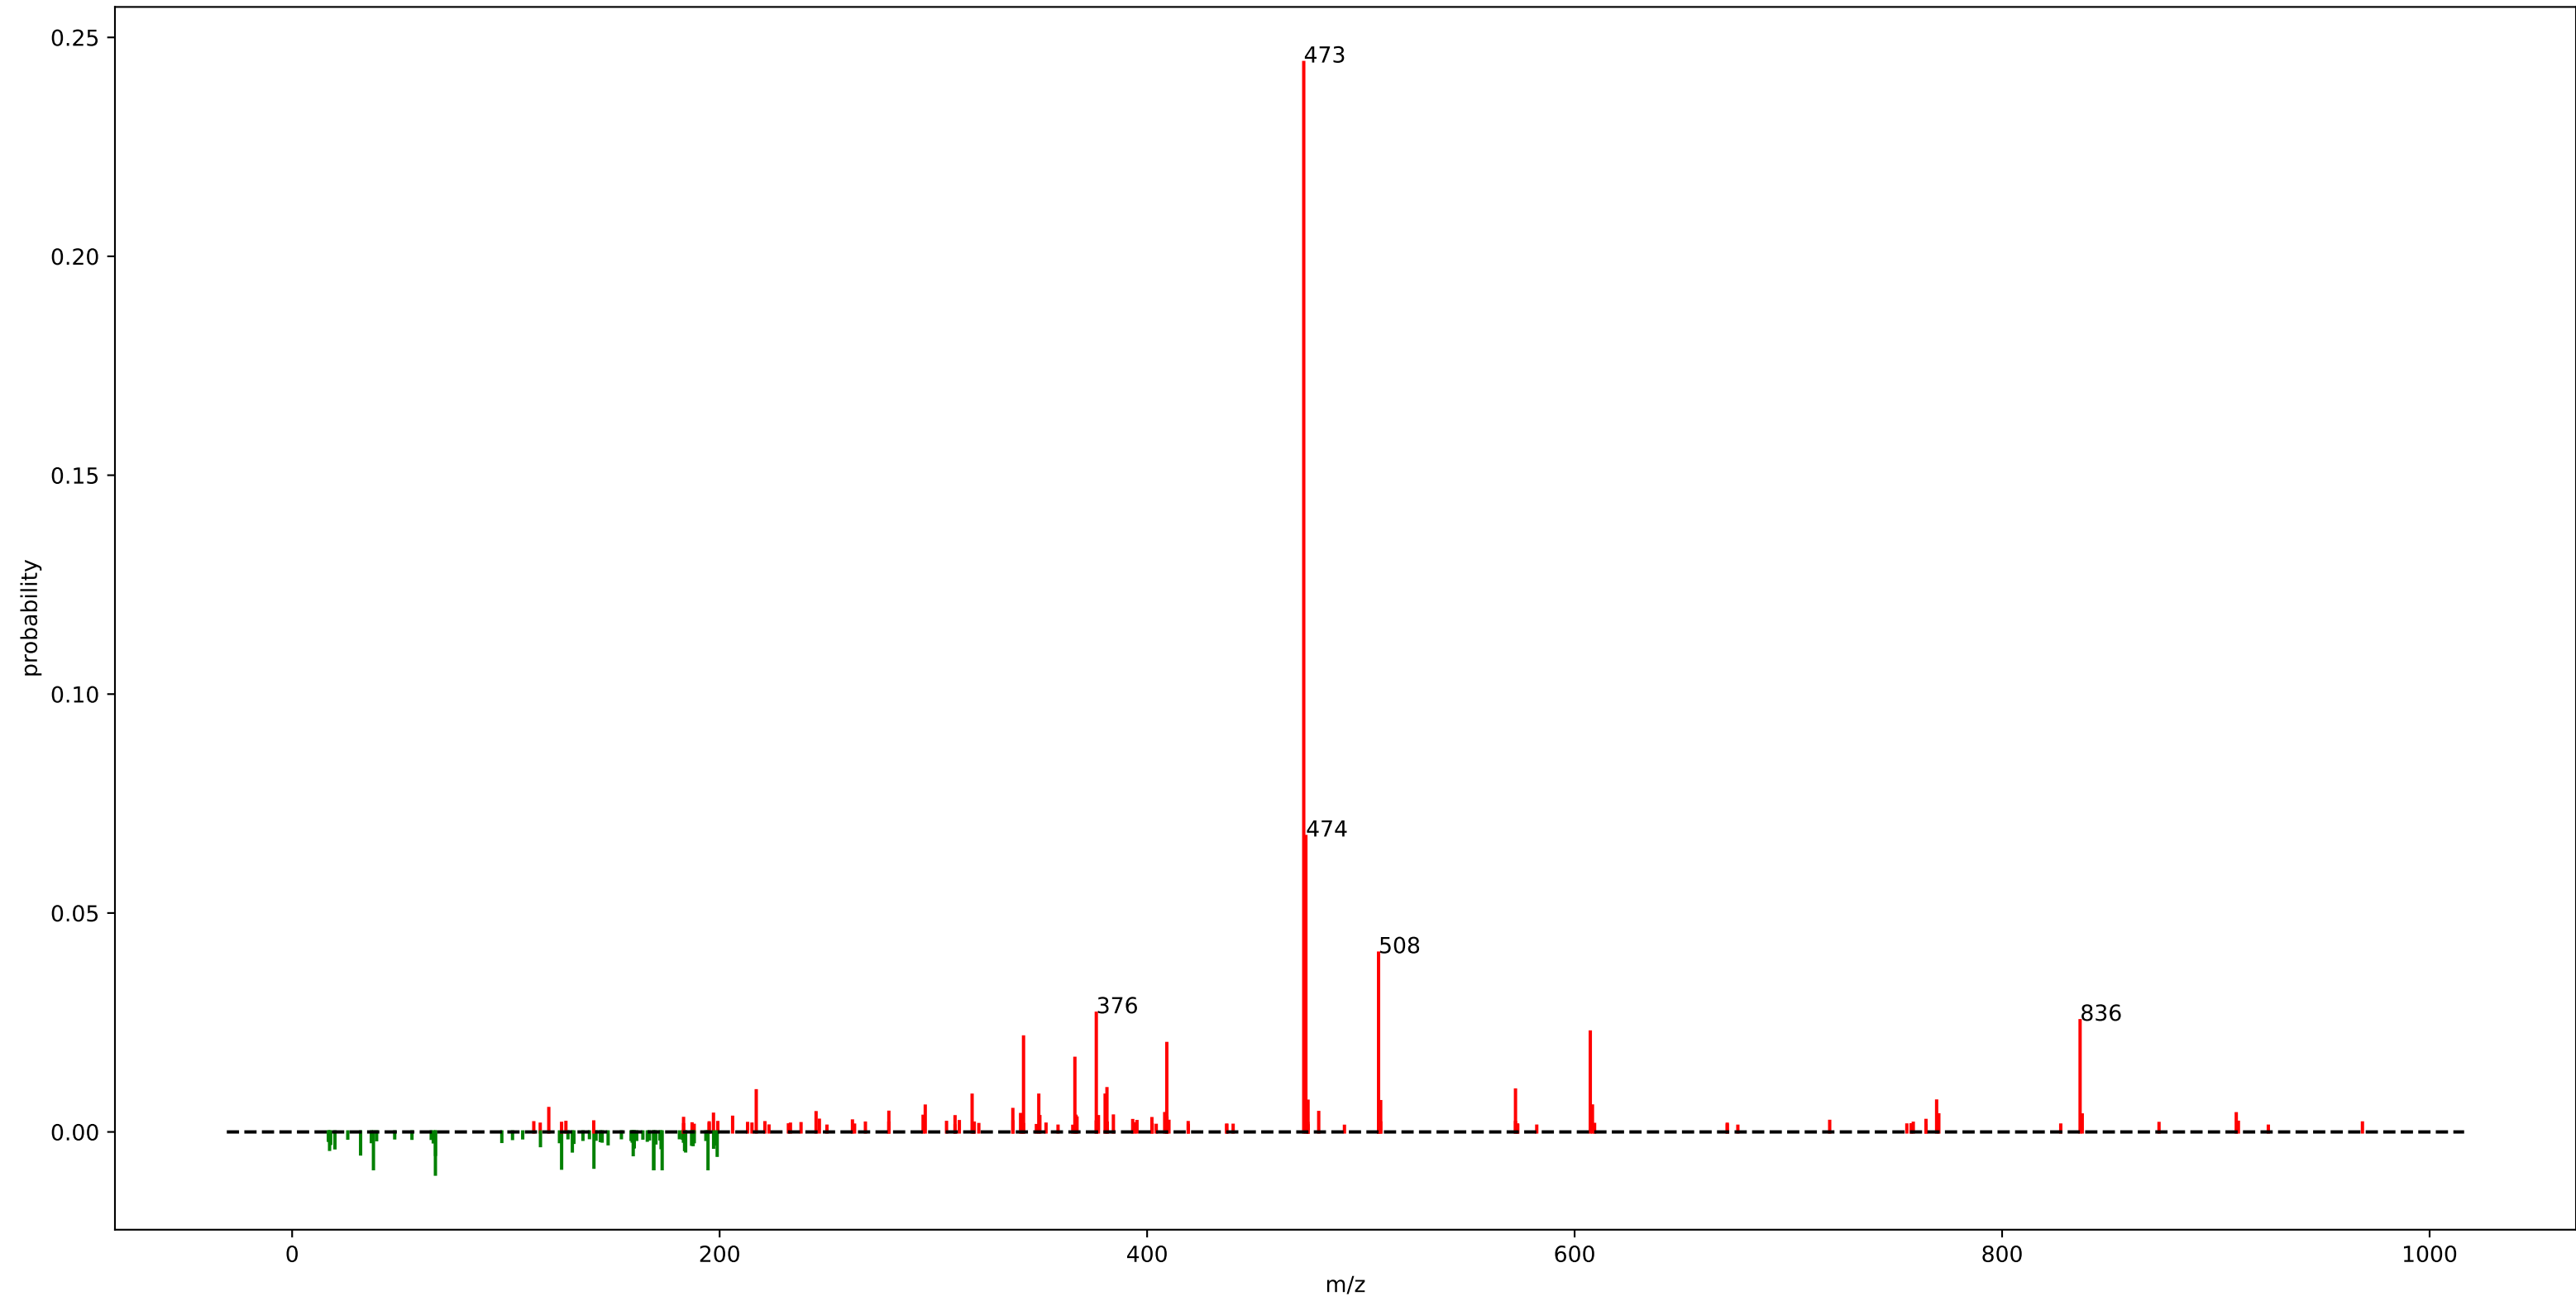

# rhabdus\_motif\_118.m2m

|                   |        |                   |        |
|-------------------|--------|-------------------|--------|
| fragment_473.2775 | : 0.24 | fragment_318.1225 | : 0.01 |
| fragment_474.2775 | : 0.07 | loss_126.0725     | : 0.01 |
| fragment_508.2775 | : 0.04 | loss_141.1925     | : 0.01 |
| fragment_376.2225 | : 0.03 | fragment_769.3675 | : 0.01 |
| fragment_836.4875 | : 0.03 | fragment_475.2825 | : 0.01 |
| fragment_607.3425 | : 0.02 | fragment_509.2775 | : 0.01 |
| fragment_342.1825 | : 0.02 | fragment_608.3475 | : 0.01 |
| fragment_409.2075 | : 0.02 | fragment_296.1975 | : 0.01 |
| fragment_366.2075 | : 0.02 | fragment_120.0775 | : 0.01 |
| fragment_381.2125 | : 0.01 | loss_198.8625     | : 0.01 |
| loss_67.0325      | : 0.01 | loss_159.5725     | : 0.01 |
| fragment_572.3425 | : 0.01 | loss_67.0725      | : 0.01 |
| fragment_217.1325 | : 0.01 | fragment_337.1825 | : 0.01 |
| loss_173.1125     | : 0.01 | loss_32.0325      | : 0.01 |
| loss_38.0425      | : 0.01 |                   |        |
| fragment_380.3525 | : 0.01 |                   |        |
| loss_194.5675     | : 0.01 |                   |        |
| loss_169.1825     | : 0.01 |                   |        |
| loss_169.1575     | : 0.01 |                   |        |
| fragment_349.3175 | : 0.01 |                   |        |

motif\_430

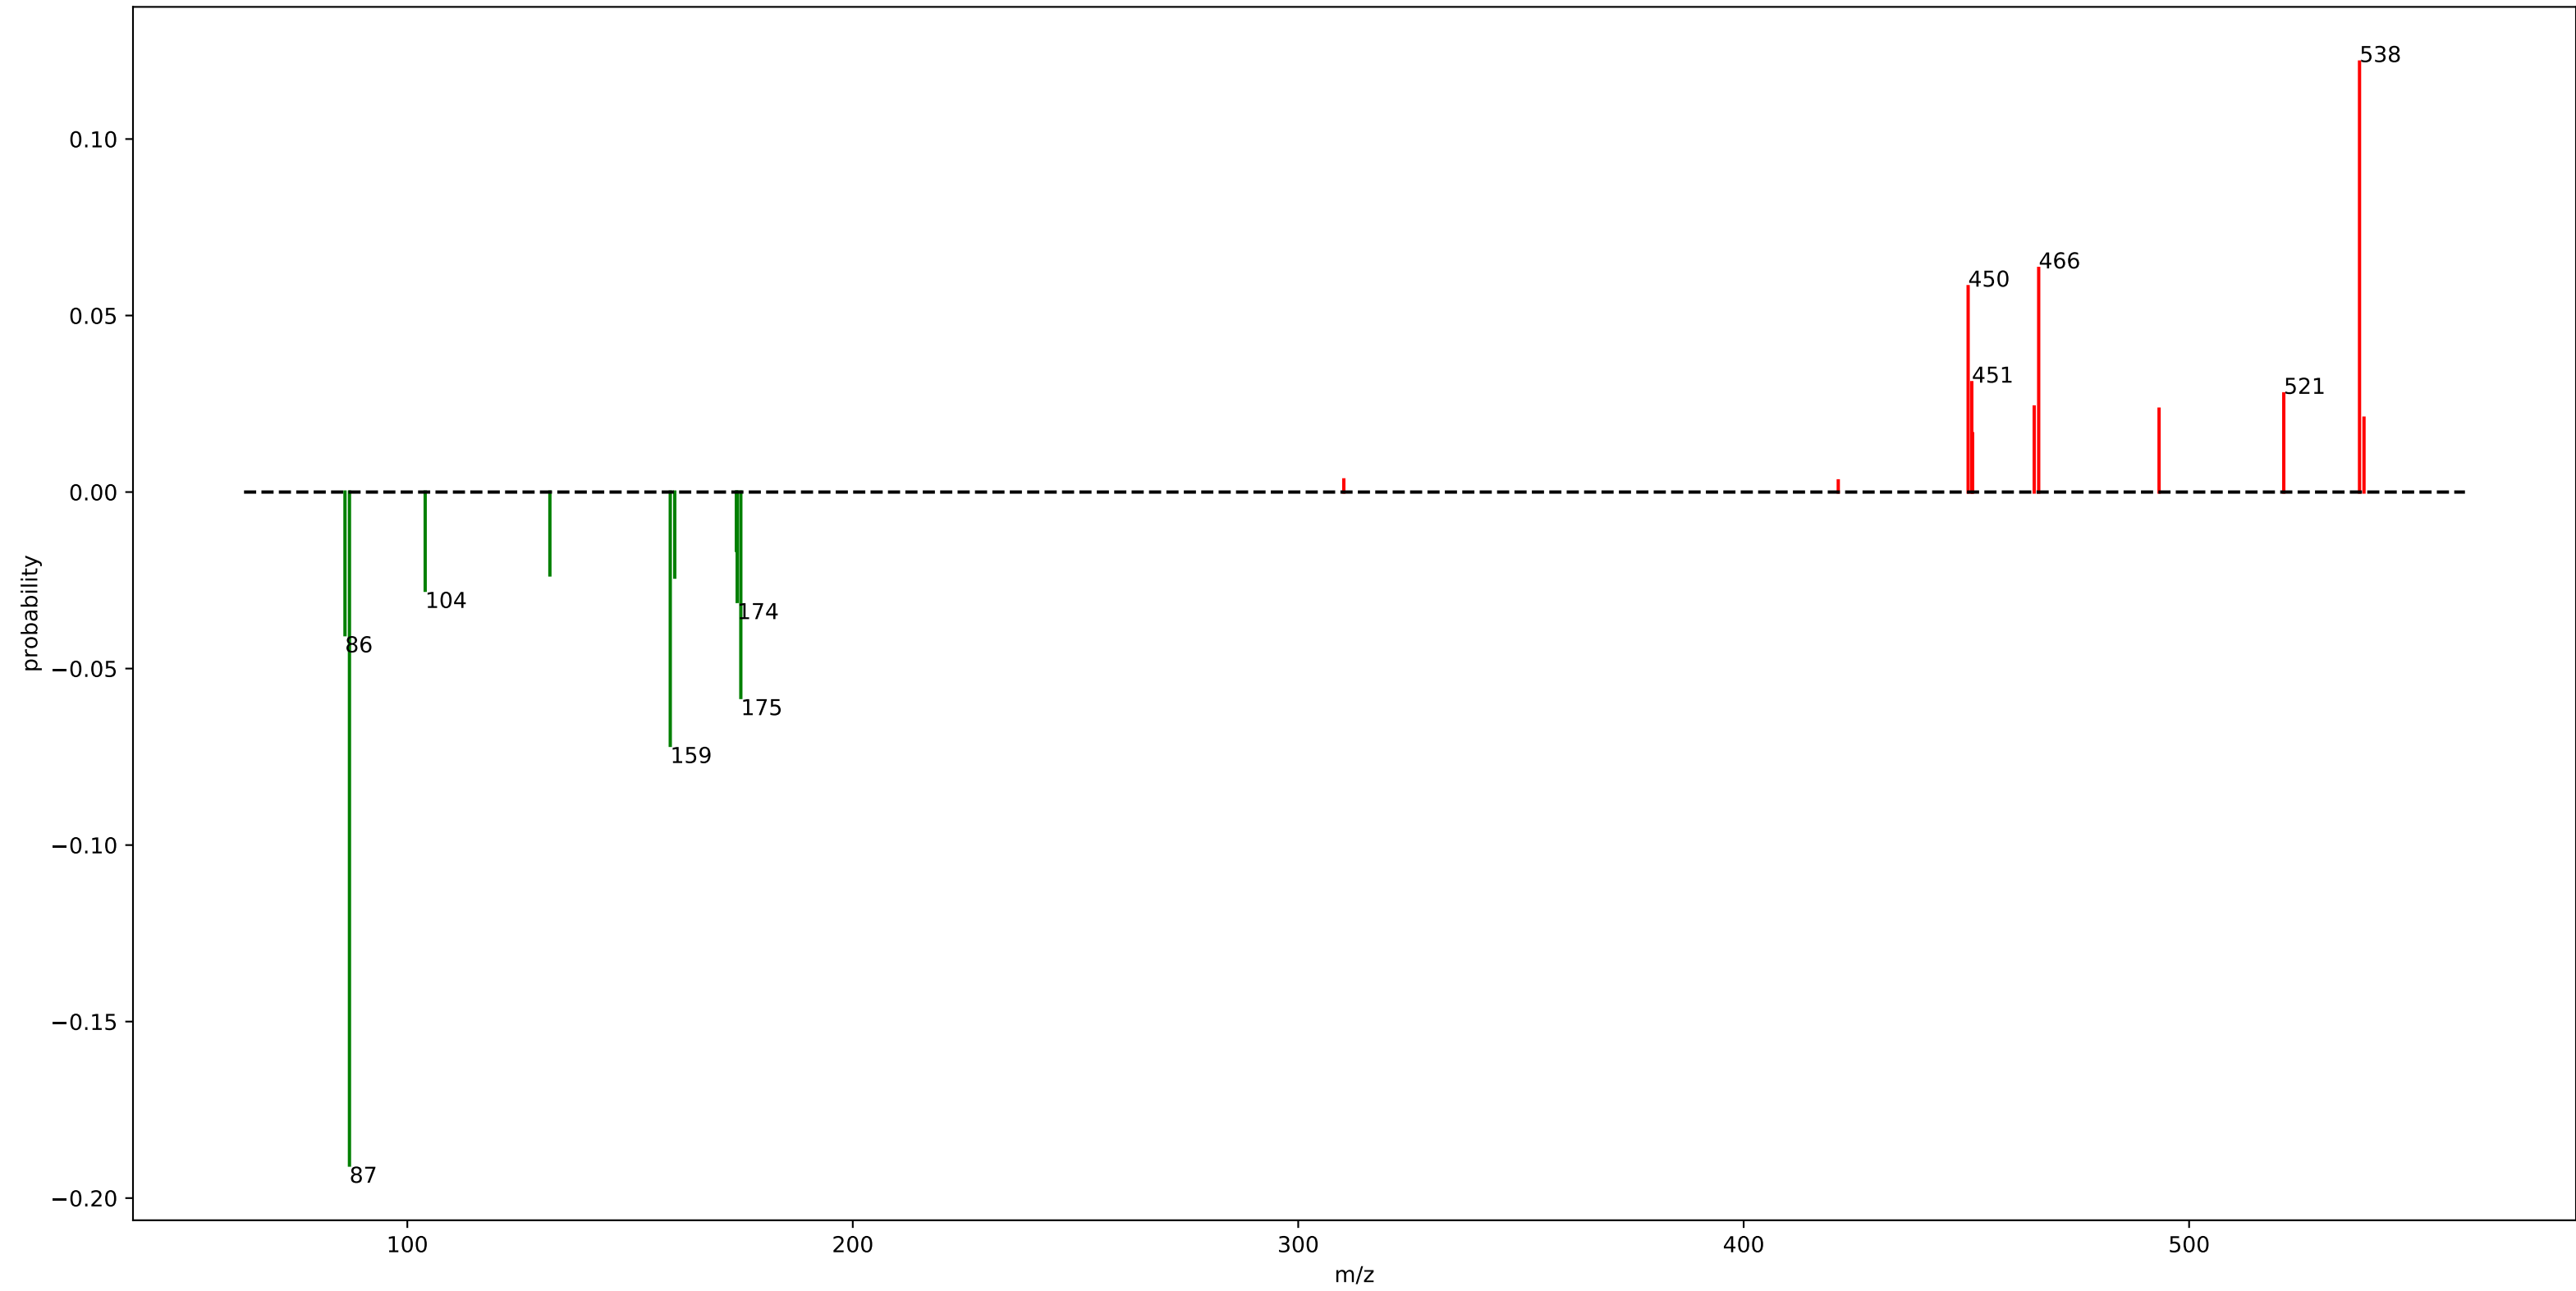

## motif\_430

|                   |        |
|-------------------|--------|
| loss_87.0075      | : 0.19 |
| fragment_538.2575 | : 0.12 |
| loss_159.0275     | : 0.07 |
| fragment_466.2325 | : 0.06 |
| fragment_450.3925 | : 0.06 |
| loss_174.8675     | : 0.06 |
| loss_86.0025      | : 0.04 |
| fragment_451.2125 | : 0.03 |
| loss_174.0475     | : 0.03 |
| loss_104.0075     | : 0.03 |
| fragment_521.2525 | : 0.03 |
| loss_160.0375     | : 0.02 |
| fragment_465.2275 | : 0.02 |
| loss_132.0025     | : 0.02 |
| fragment_493.2575 | : 0.02 |
| fragment_539.2625 | : 0.02 |
| fragment_451.3975 | : 0.02 |
| loss_173.8625     | : 0.02 |

motif\_431

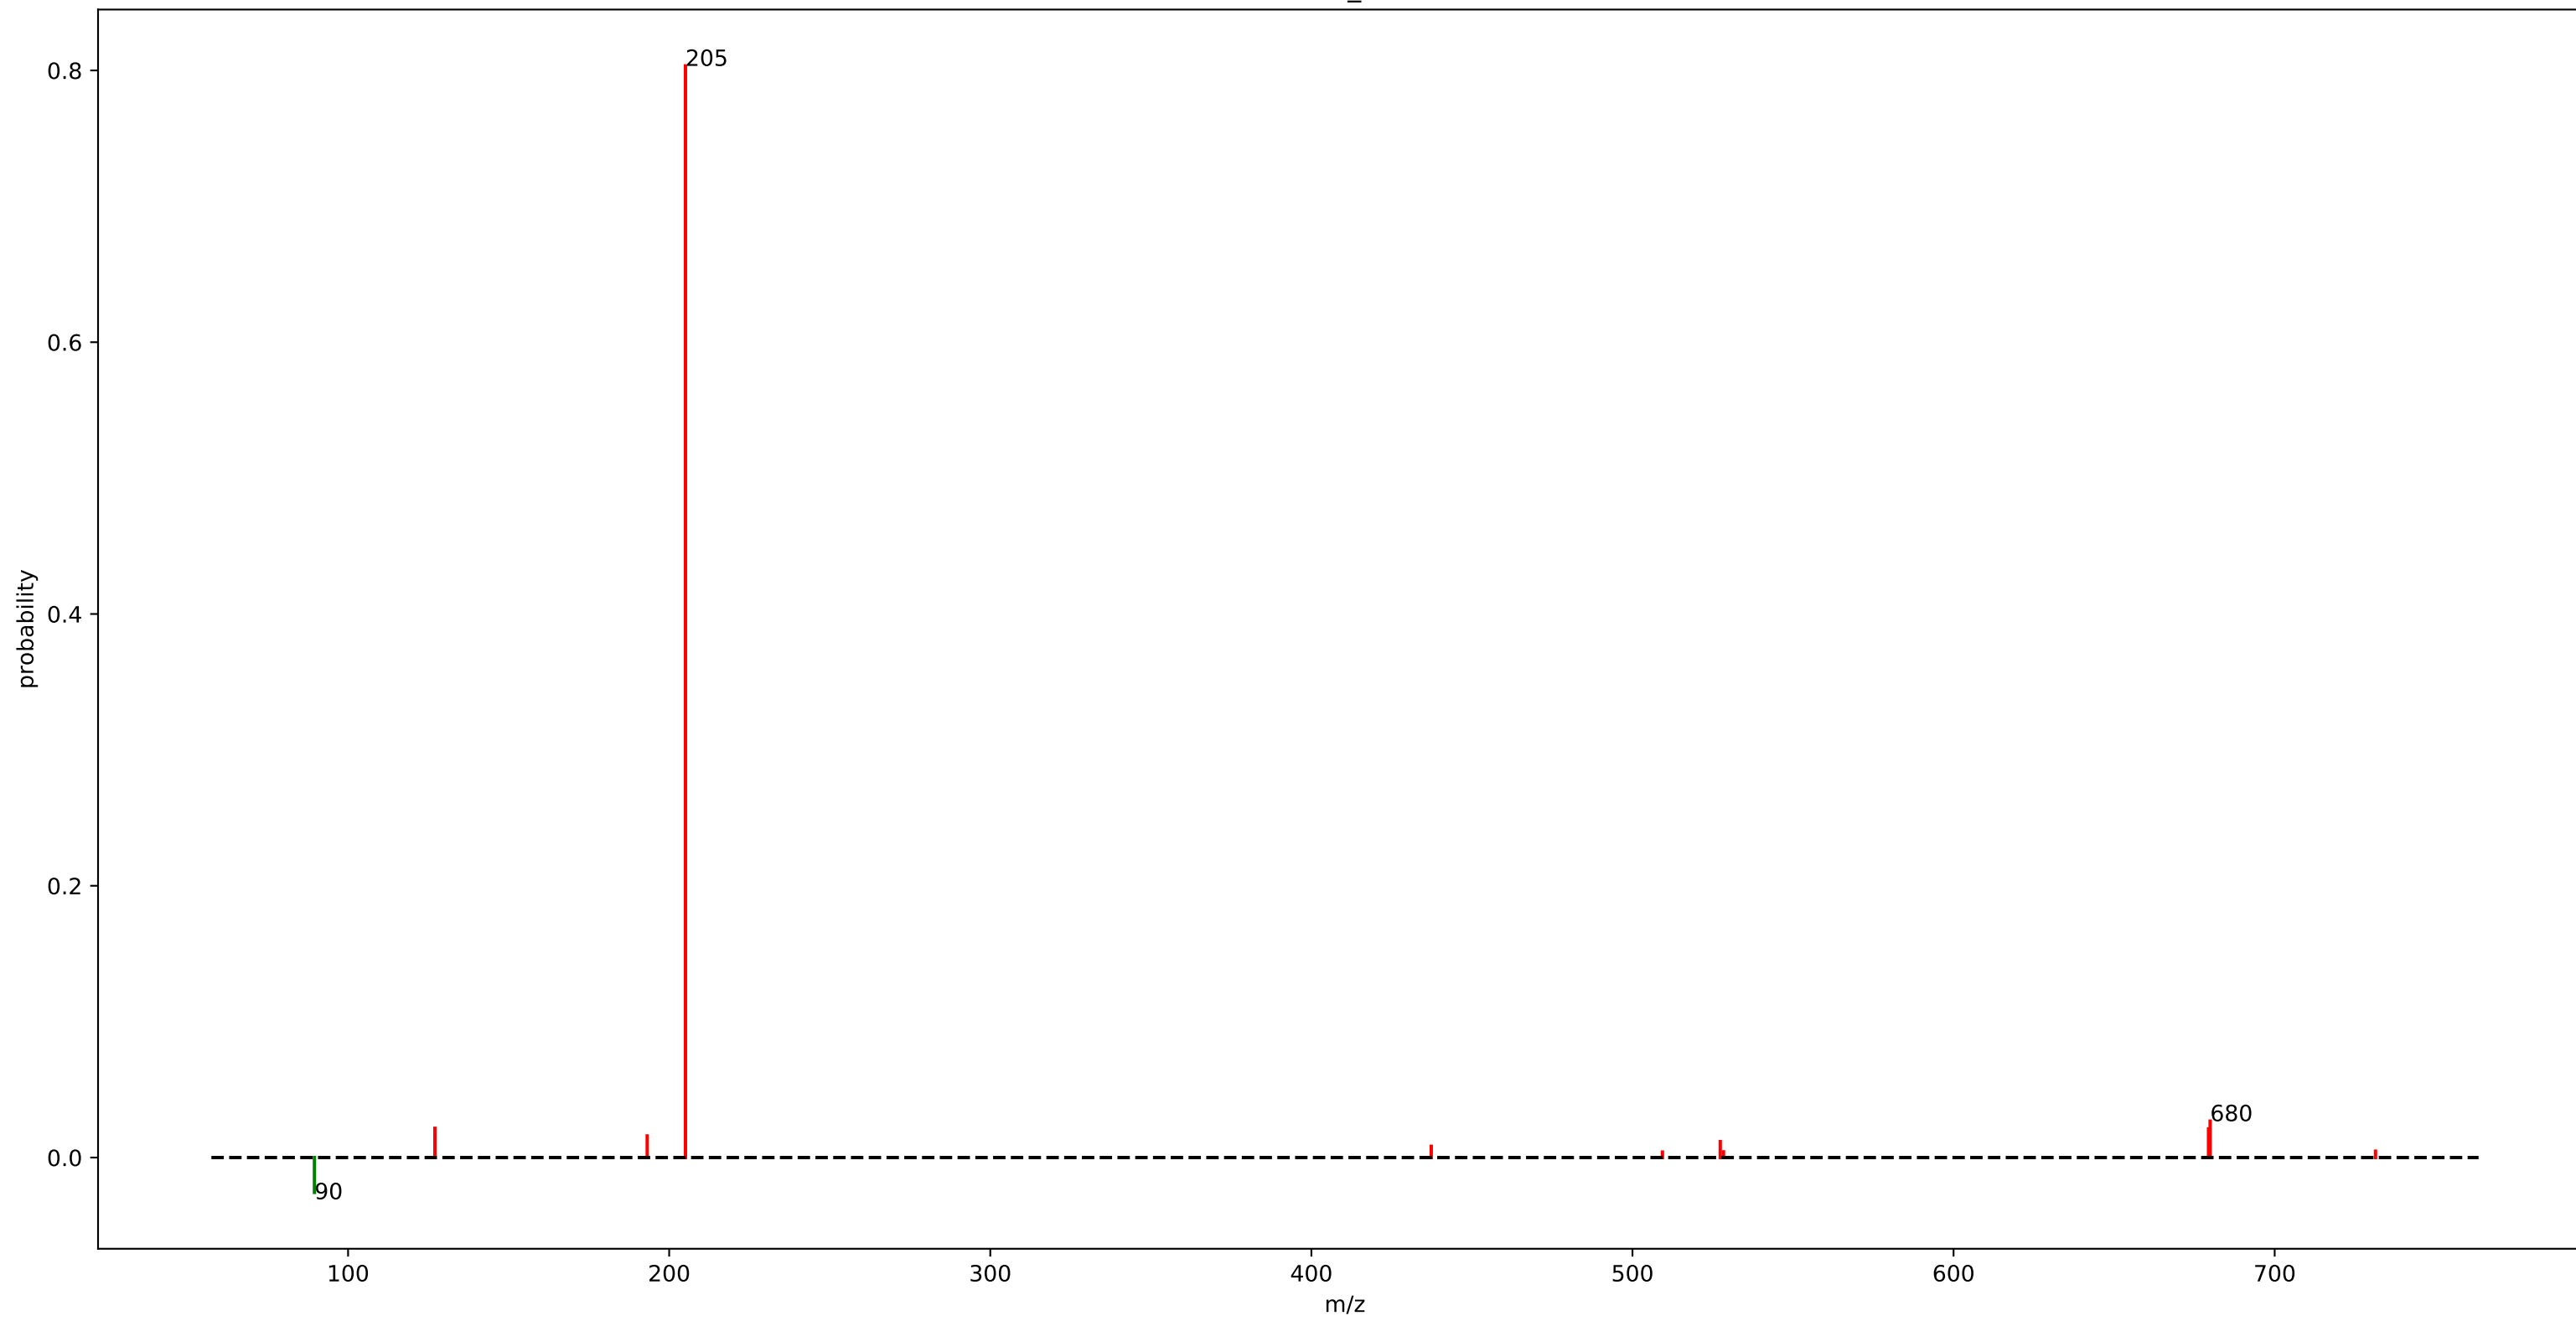

## motif\_431

|                   |        |
|-------------------|--------|
| fragment_205.0725 | : 0.80 |
| fragment_679.8975 | : 0.03 |
| loss_89.5275      | : 0.03 |
| fragment_127.0375 | : 0.02 |
| fragment_679.4025 | : 0.02 |
| fragment_193.1575 | : 0.02 |
| fragment_527.3325 | : 0.01 |
| fragment_437.3325 | : 0.01 |

motif\_432

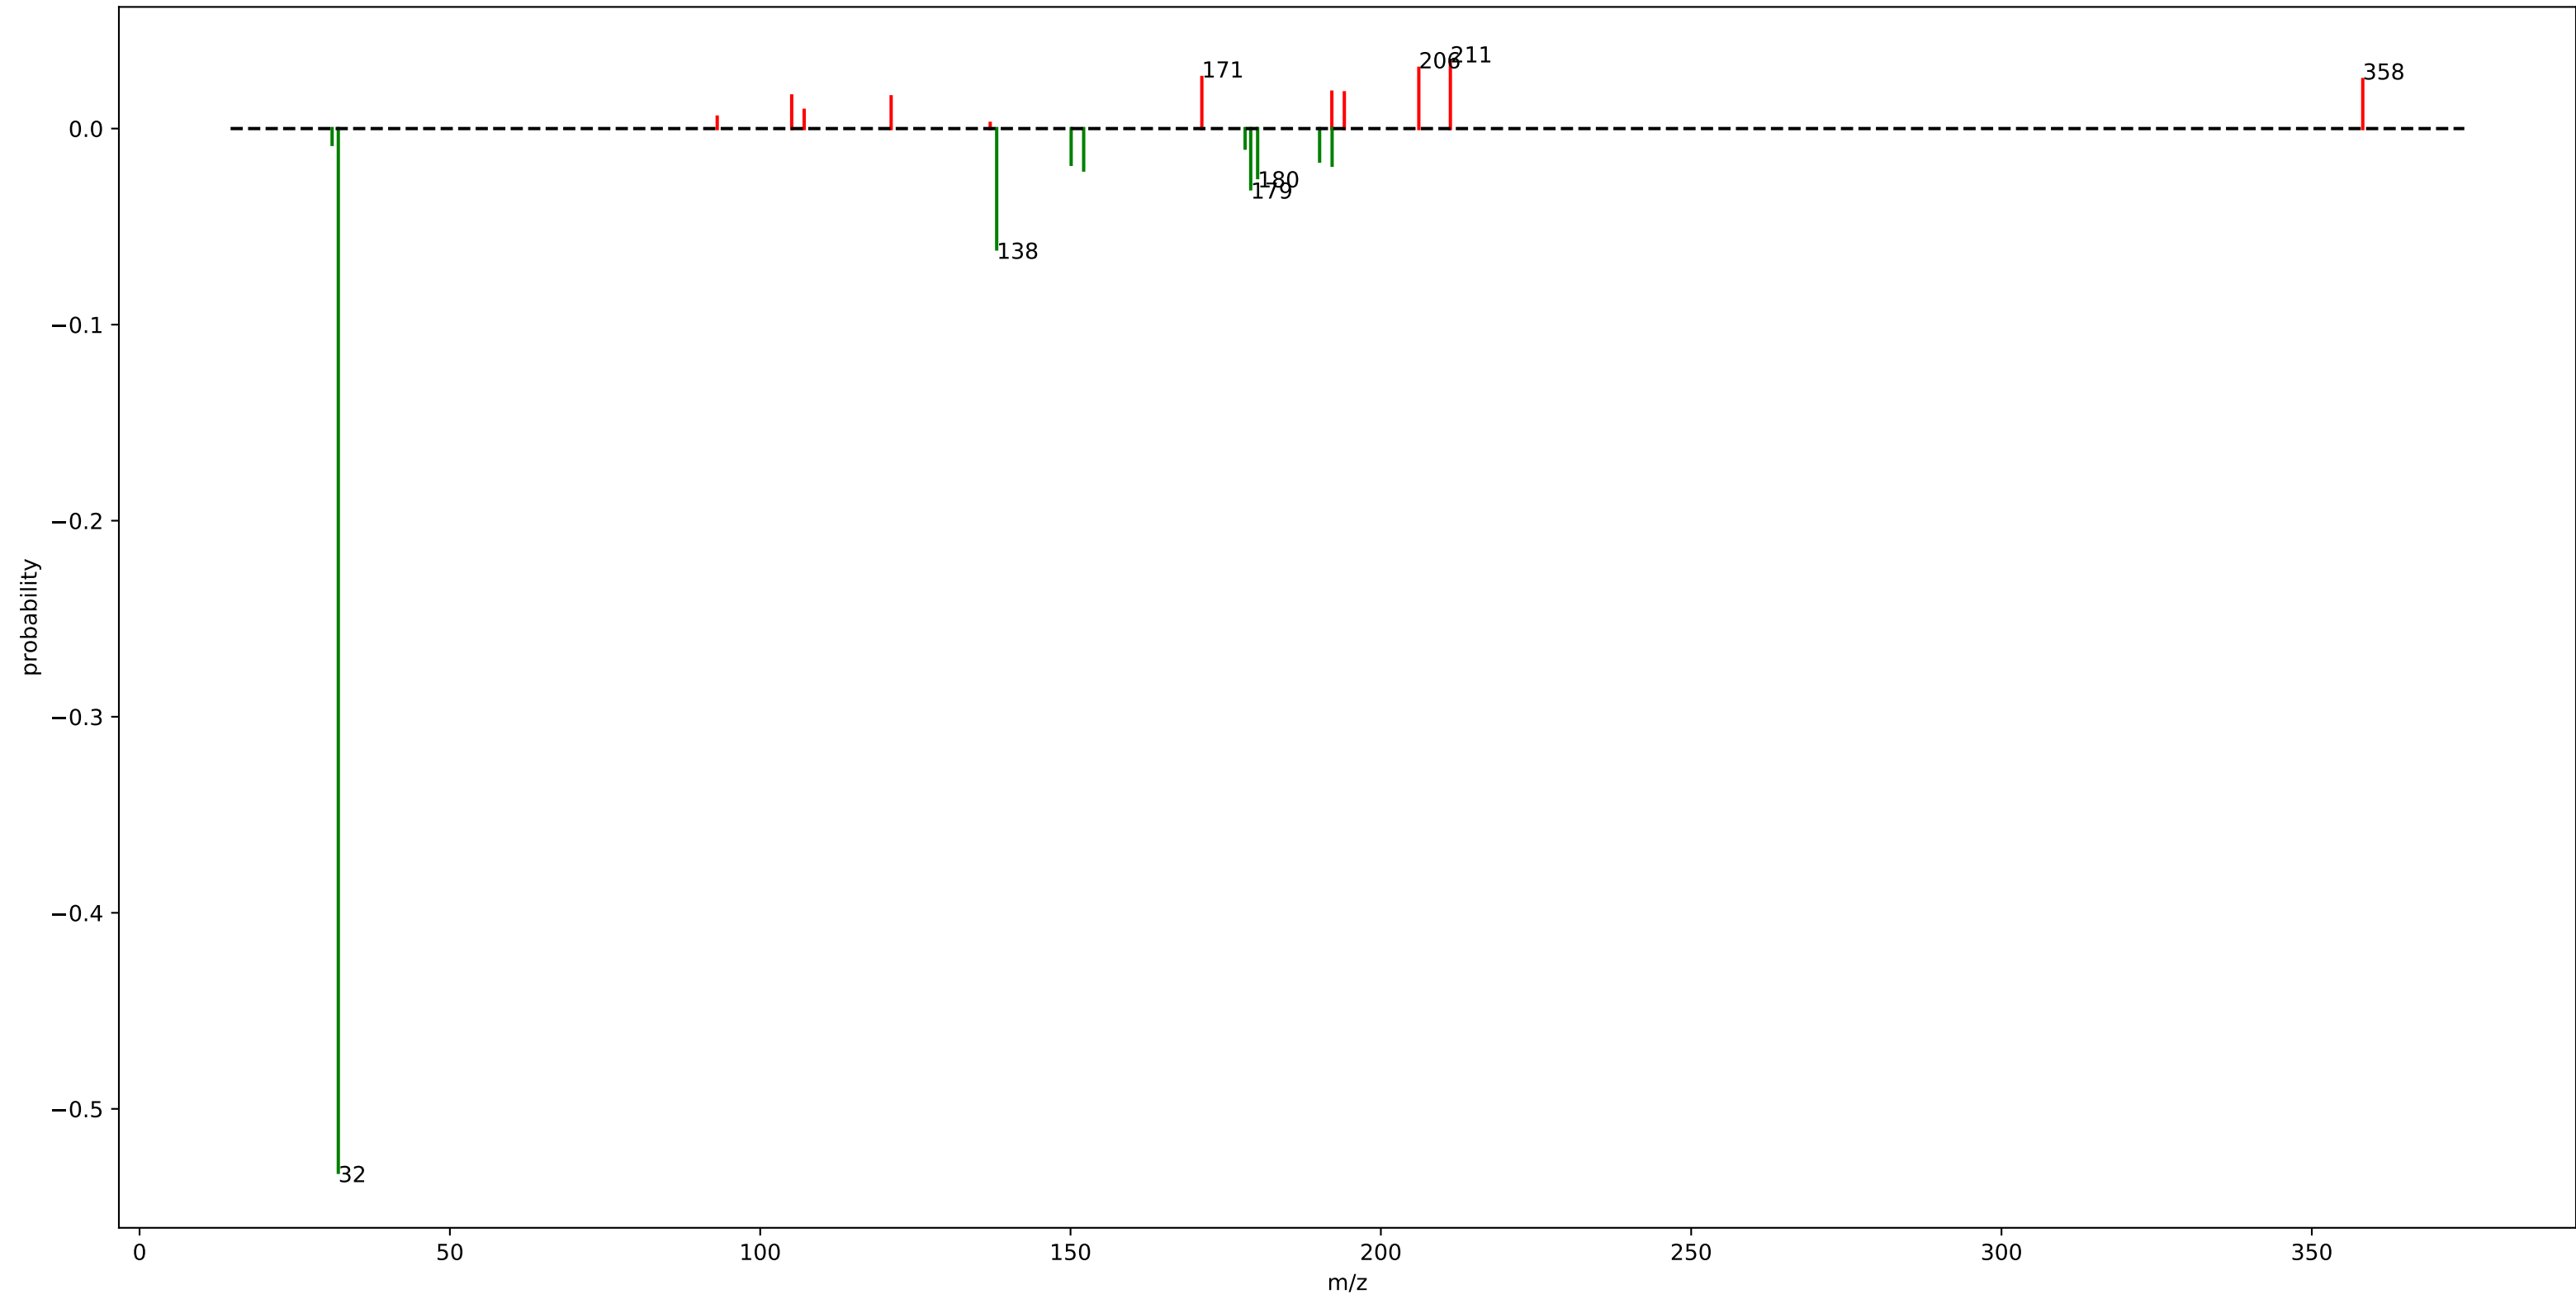

## motif\_432

|                   |        |
|-------------------|--------|
| loss_32.0225      | : 0.53 |
| loss_138.1025     | : 0.06 |
| fragment_211.2025 | : 0.03 |
| loss_179.0325     | : 0.03 |
| fragment_206.1175 | : 0.03 |
| fragment_171.1575 | : 0.03 |
| fragment_358.2125 | : 0.03 |
| loss_180.1475     | : 0.03 |
| loss_152.1175     | : 0.02 |
| loss_192.1475     | : 0.02 |
| fragment_192.1025 | : 0.02 |
| loss_150.1025     | : 0.02 |
| fragment_194.1175 | : 0.02 |
| fragment_105.0725 | : 0.02 |
| loss_190.1325     | : 0.02 |
| fragment_121.0975 | : 0.02 |
| loss_178.1325     | : 0.01 |
| fragment_107.0825 | : 0.01 |
| loss_31.0225      | : 0.01 |
| fragment_93.0725  | : 0.01 |



motif\_433

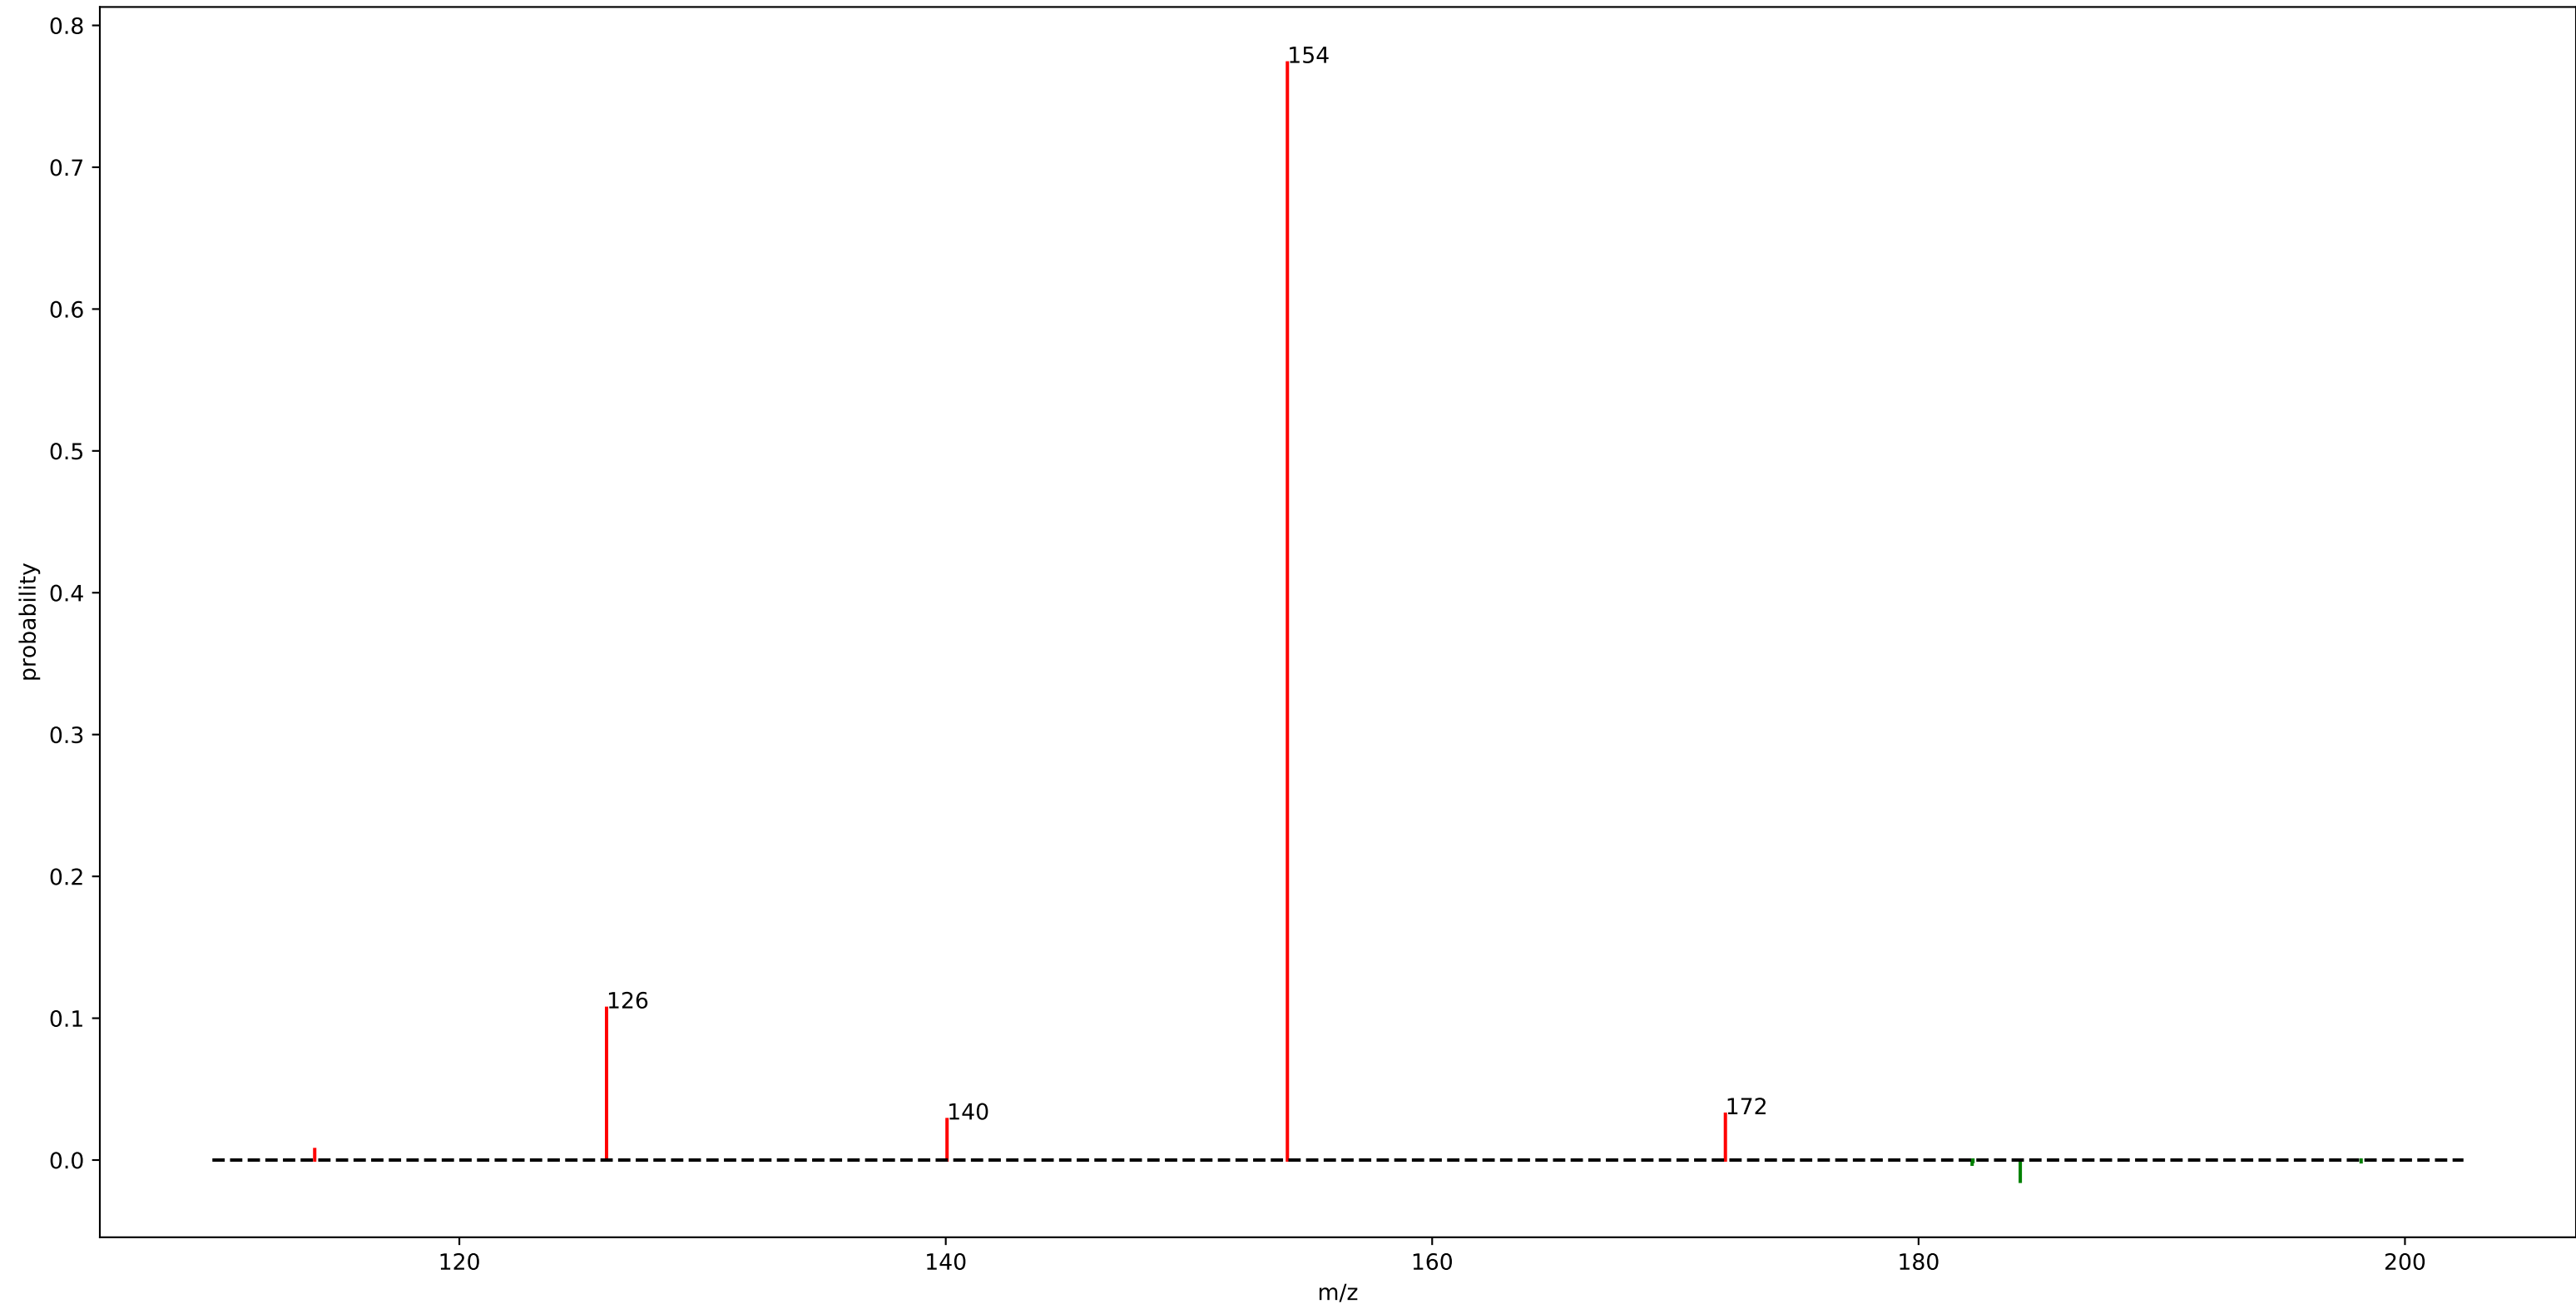

## motif\_433

|                   |        |
|-------------------|--------|
| fragment_154.0475 | : 0.77 |
| fragment_126.0525 | : 0.11 |
| fragment_172.0575 | : 0.03 |
| fragment_140.0525 | : 0.03 |
| loss_184.1825     | : 0.02 |
| fragment_114.0525 | : 0.01 |

motif\_434

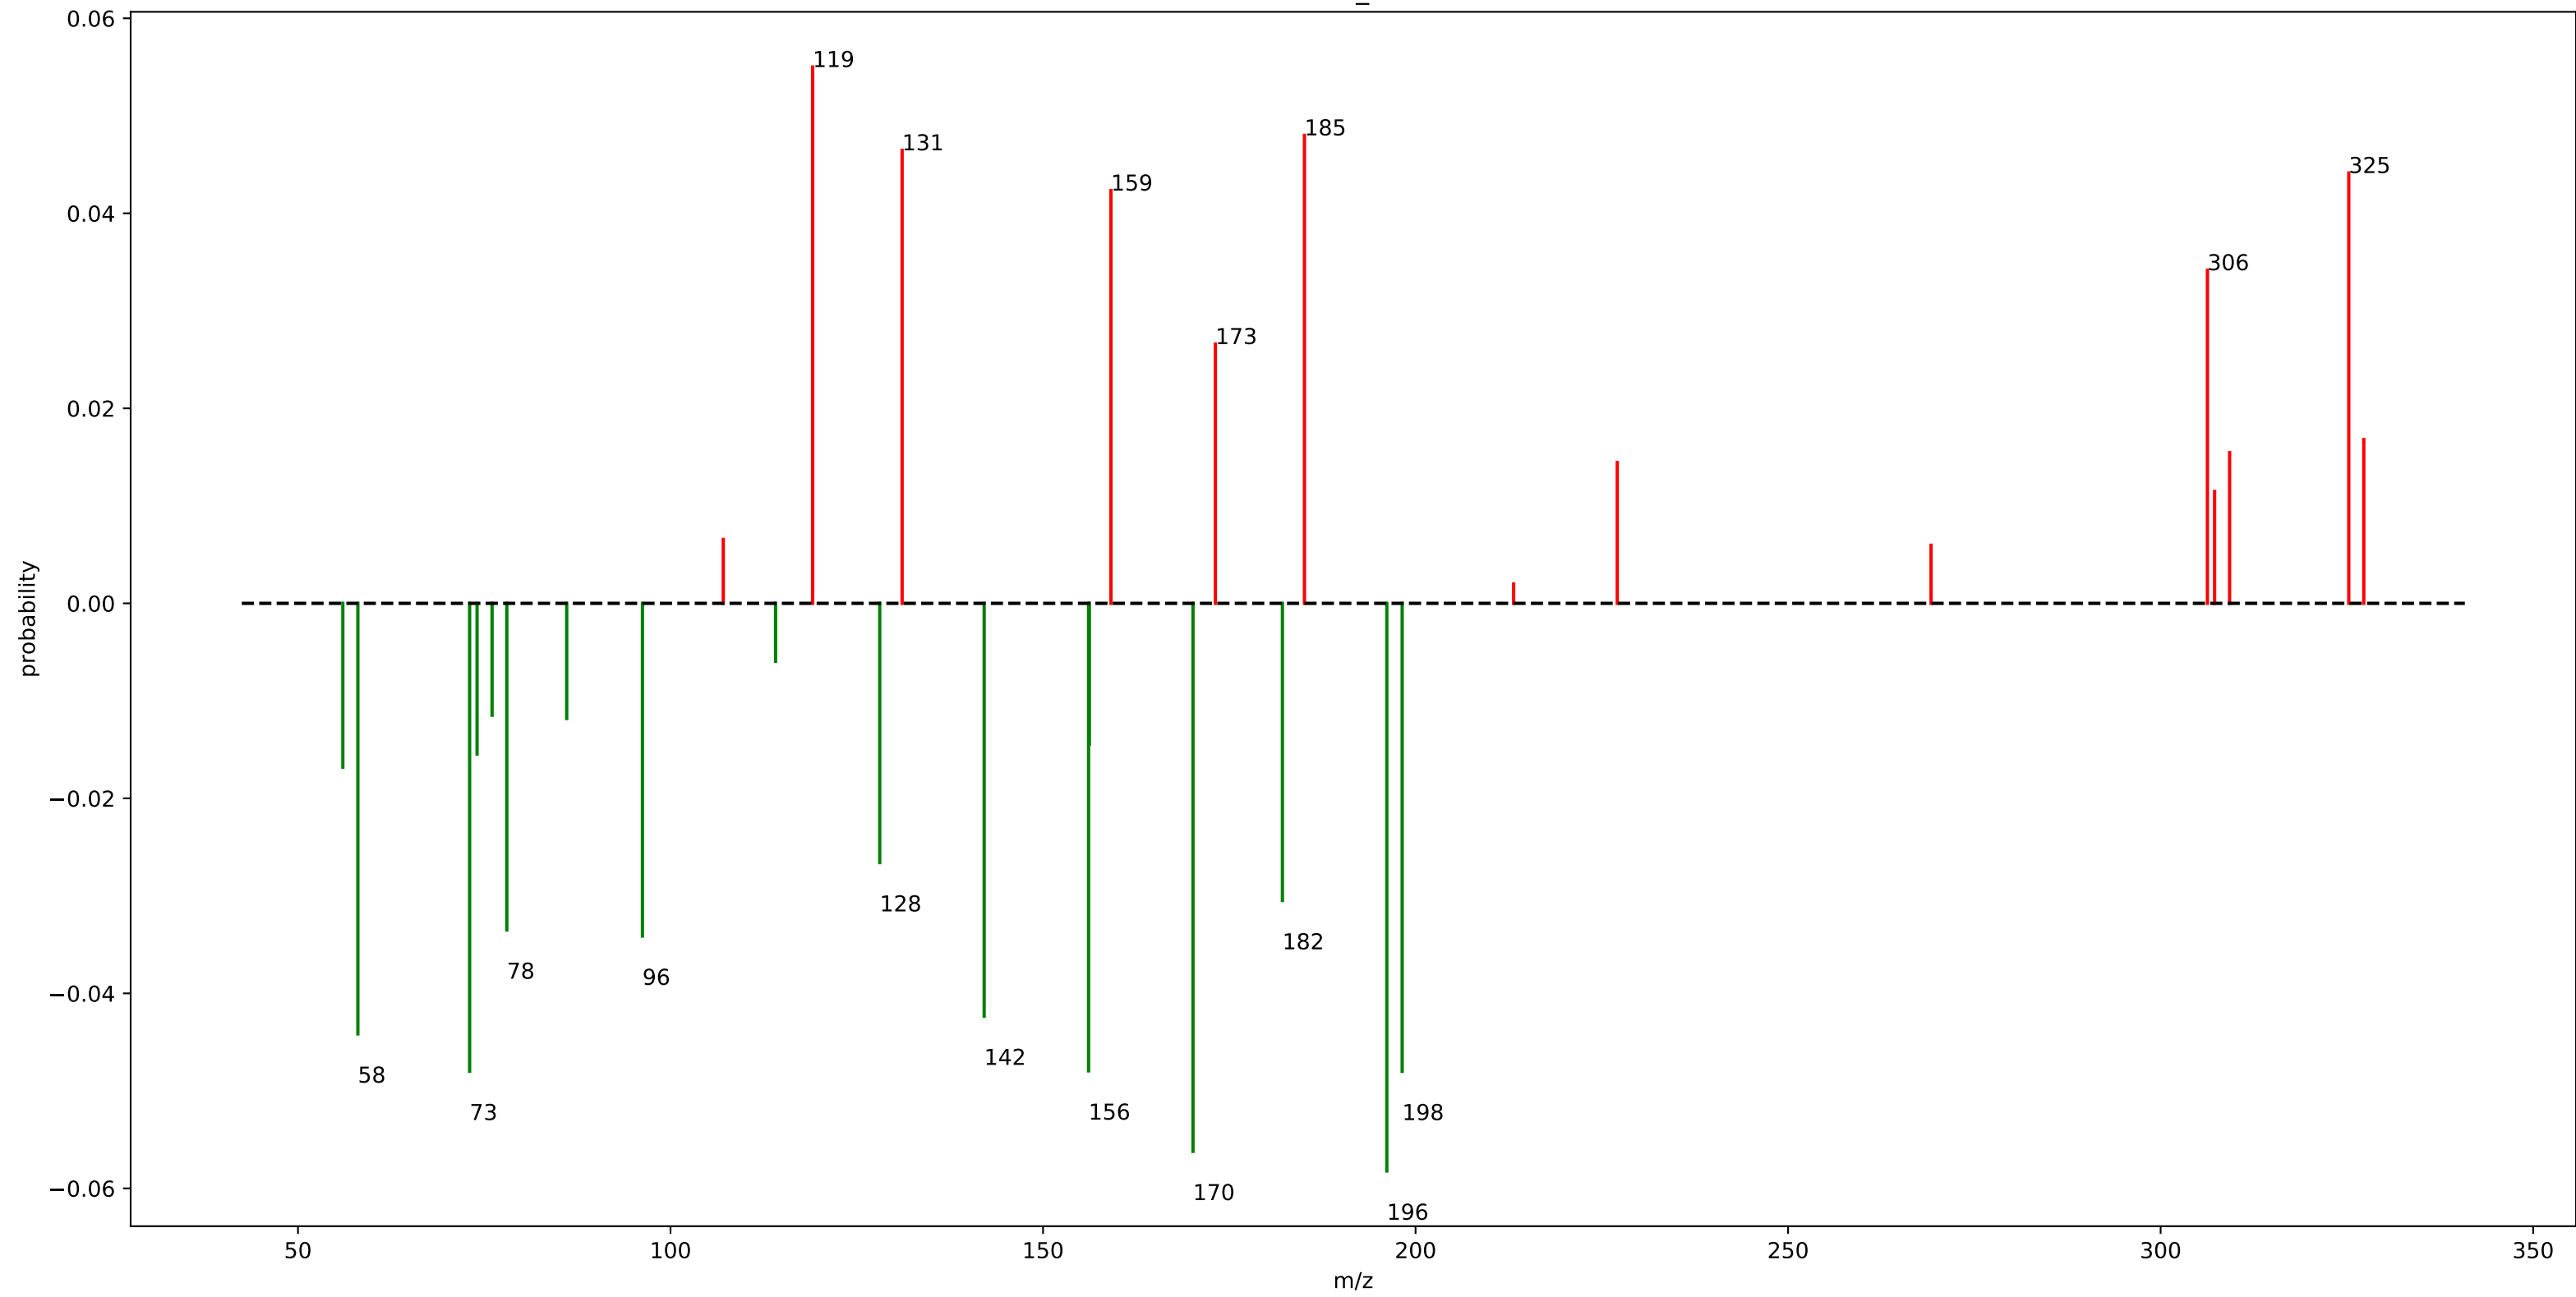

# motif\_434

|                   |        |                   |        |
|-------------------|--------|-------------------|--------|
| loss_196.1425     | : 0.06 | loss_74.0375      | : 0.02 |
| loss_170.1275     | : 0.06 | fragment_309.2575 | : 0.02 |
| fragment_119.0825 | : 0.06 | fragment_227.0725 | : 0.01 |
| fragment_185.0875 | : 0.05 | loss_156.2175     | : 0.01 |
| loss_198.2025     | : 0.05 | loss_86.0725      | : 0.01 |
| loss_73.0375      | : 0.05 | fragment_307.2425 | : 0.01 |
| loss_156.1125     | : 0.05 | loss_76.0525      | : 0.01 |
| fragment_131.0875 | : 0.05 | fragment_107.0825 | : 0.01 |
| loss_58.0375      | : 0.04 | fragment_269.1875 | : 0.01 |
| fragment_325.2525 | : 0.04 | loss_114.1025     | : 0.01 |
| loss_142.0975     | : 0.04 |                   |        |
| fragment_159.1175 | : 0.04 |                   |        |
| fragment_306.2775 | : 0.03 |                   |        |
| loss_96.2325      | : 0.03 |                   |        |
| loss_78.0325      | : 0.03 |                   |        |
| loss_182.1275     | : 0.03 |                   |        |
| fragment_173.1325 | : 0.03 |                   |        |
| loss_128.0825     | : 0.03 |                   |        |
| loss_56.0225      | : 0.02 |                   |        |
| fragment_327.2675 | : 0.02 |                   |        |

StrepSalini\_motif\_218.m2m

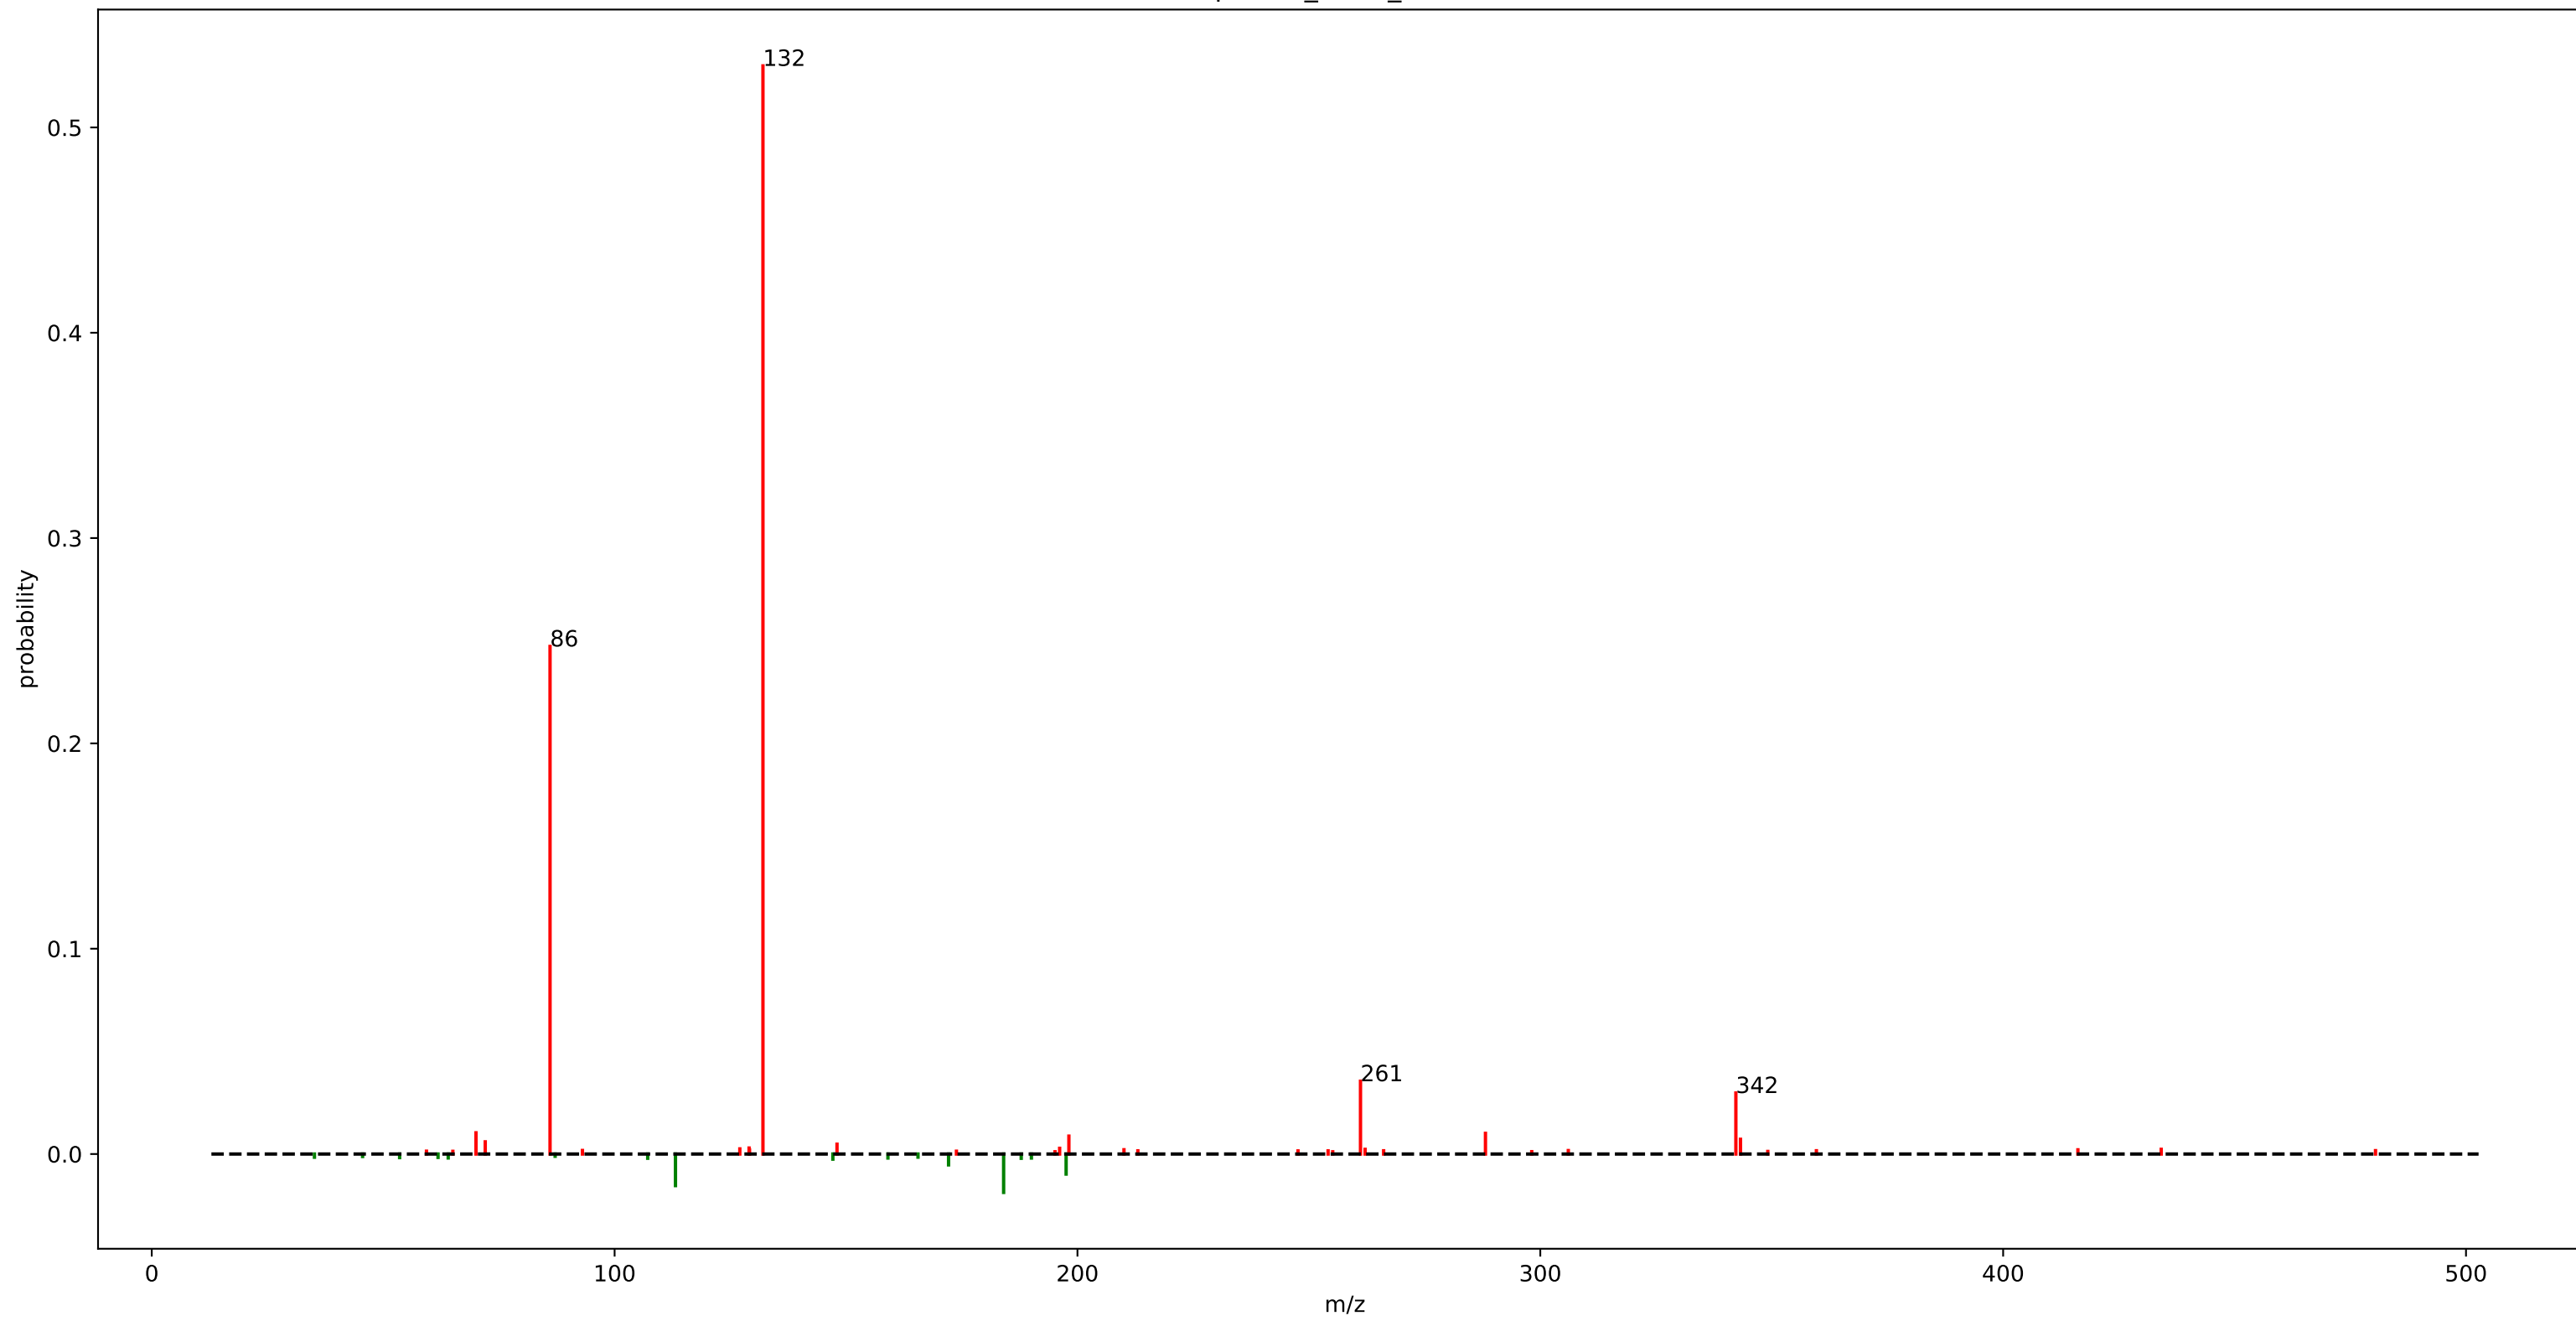

## StrepSalini\_motif\_218.m2m

|                   |        |
|-------------------|--------|
| fragment_132.0500 | : 0.53 |
| fragment_86.0500  | : 0.25 |
| fragment_261.1500 | : 0.04 |
| fragment_342.2525 | : 0.03 |
| loss_184.0500     | : 0.02 |
| loss_113.1500     | : 0.02 |
| fragment_70.0500  | : 0.01 |
| fragment_288.1500 | : 0.01 |
| loss_197.5500     | : 0.01 |
| fragment_198.1500 | : 0.01 |
| fragment_343.2500 | : 0.01 |
| fragment_72.0500  | : 0.01 |
| loss_172.1525     | : 0.01 |

rhabdus\_motif\_186.m2m

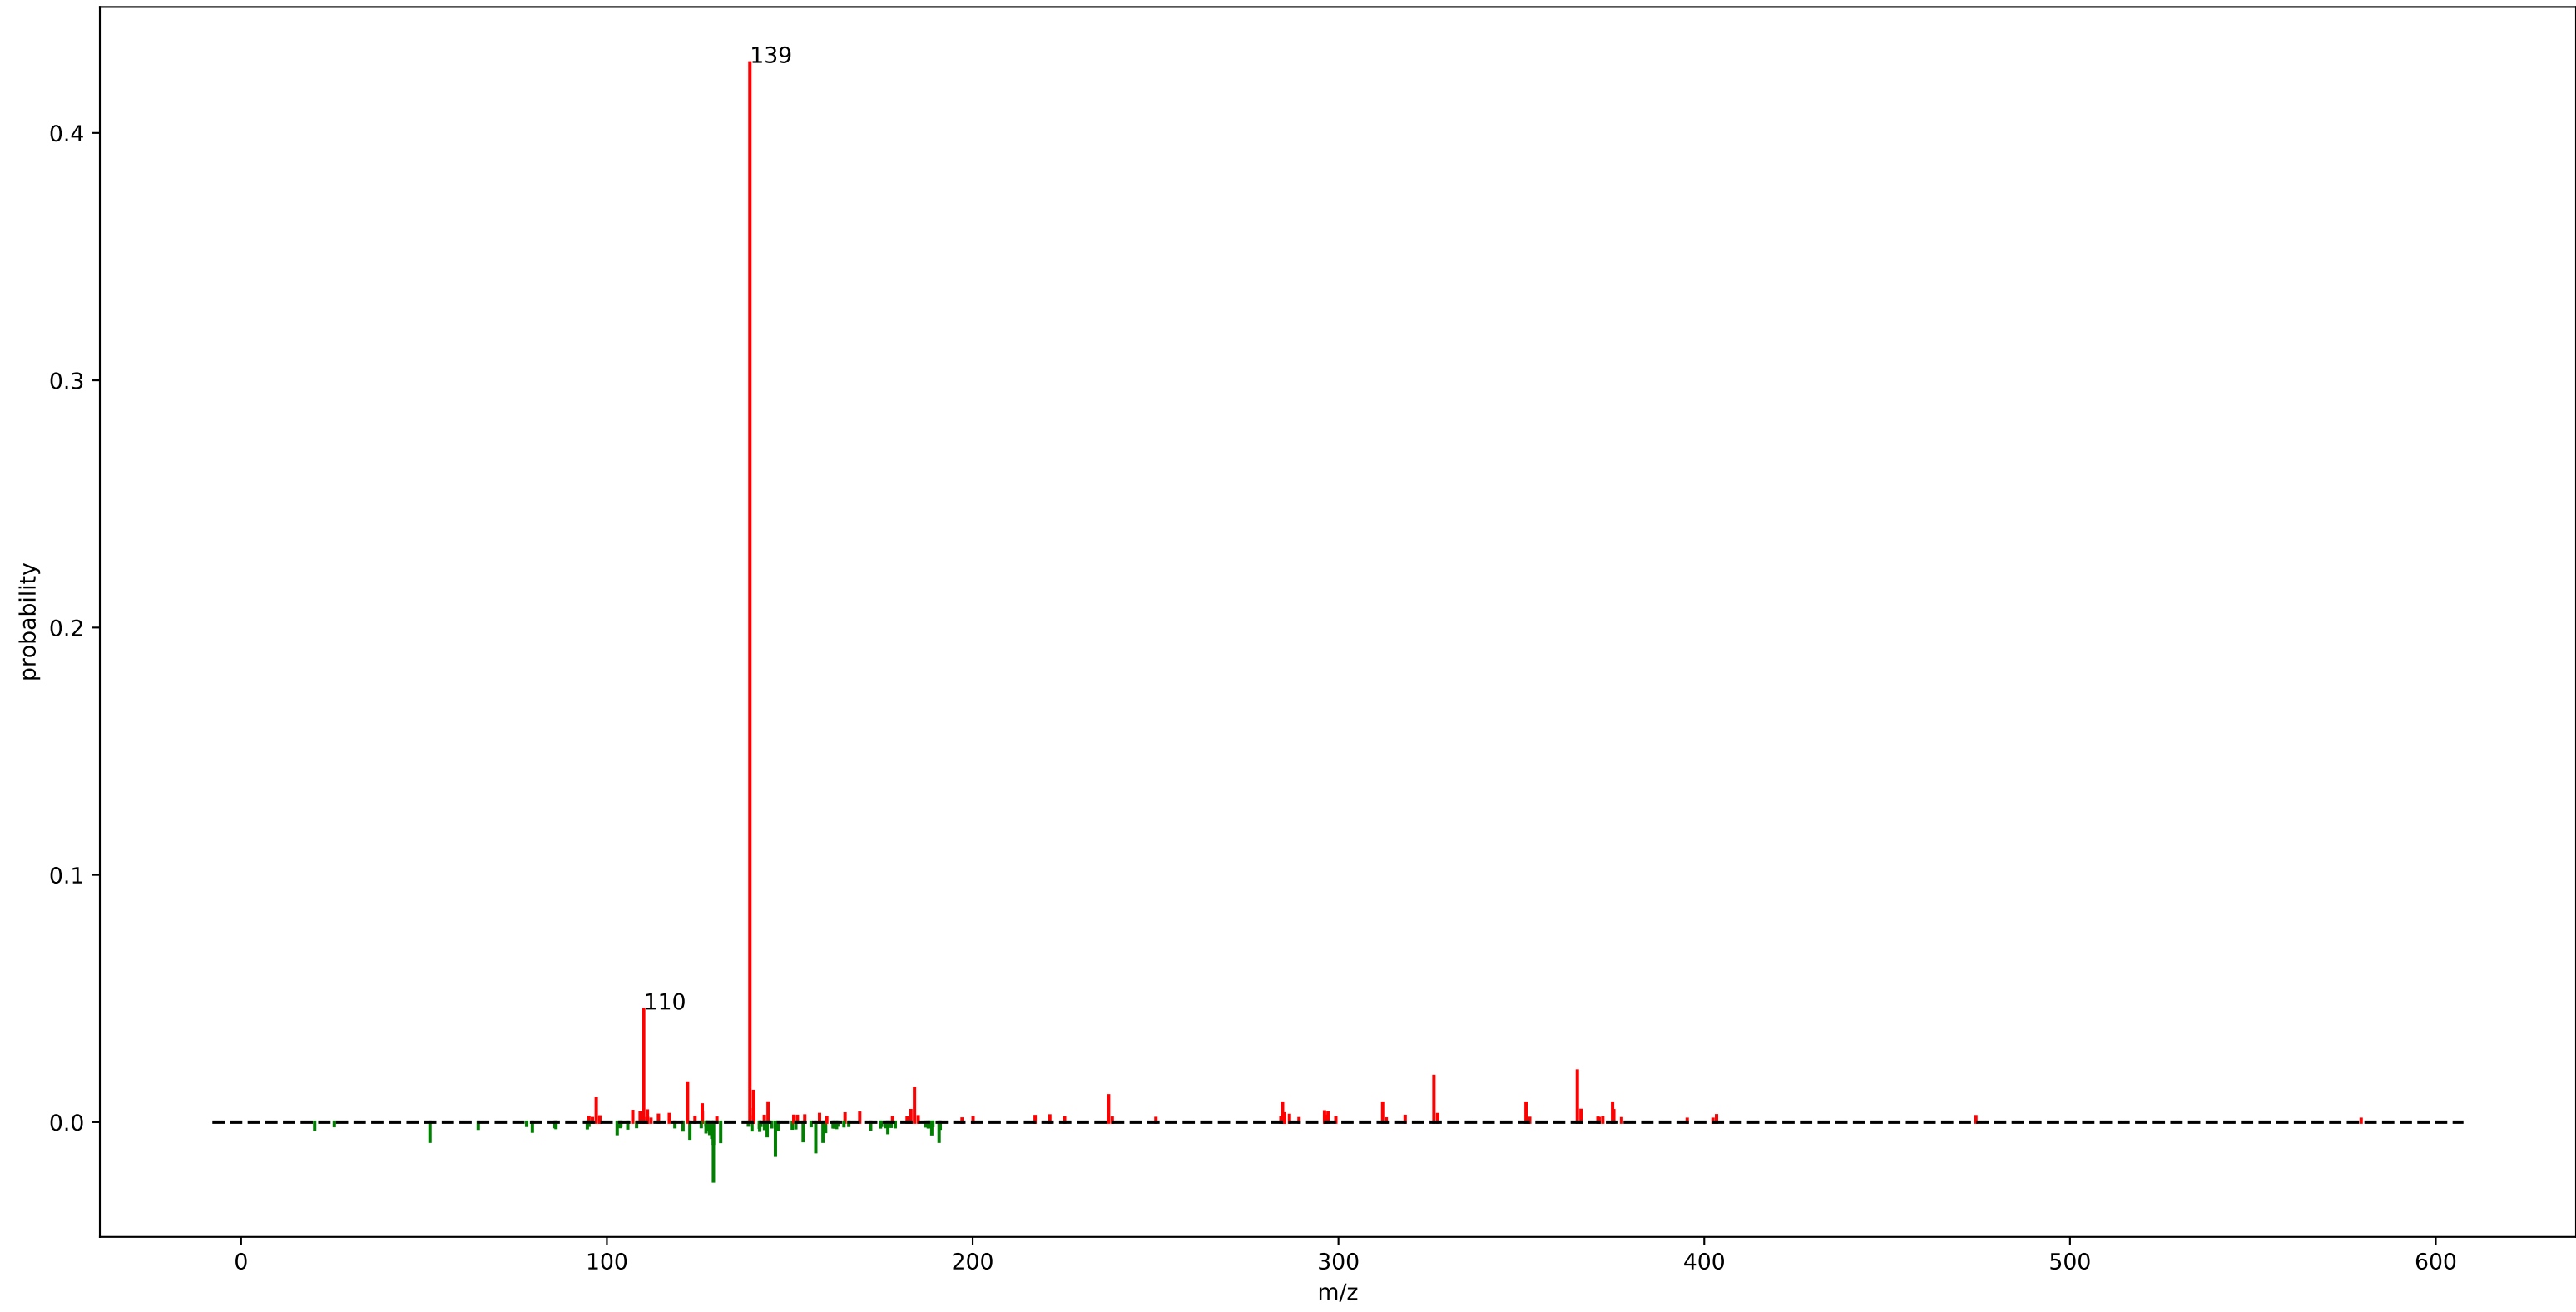

## rhabdus\_motif\_186.m2m

|                   |        |                   |        |
|-------------------|--------|-------------------|--------|
| fragment_139.0875 | : 0.43 | loss_51.6175      | : 0.01 |
| fragment_110.0575 | : 0.05 | fragment_374.9375 | : 0.01 |
| loss_129.1175     | : 0.02 | loss_153.6625     | : 0.01 |
| fragment_365.3025 | : 0.02 | fragment_126.0625 | : 0.01 |
| fragment_326.0975 | : 0.02 | loss_122.6825     | : 0.01 |
| fragment_122.0575 | : 0.02 | loss_128.6675     | : 0.01 |
| fragment_184.0975 | : 0.01 | loss_143.8225     | : 0.01 |
| loss_146.0725     | : 0.01 |                   |        |
| fragment_140.0875 | : 0.01 |                   |        |
| loss_157.1075     | : 0.01 |                   |        |
| fragment_237.1575 | : 0.01 |                   |        |
| fragment_97.0875  | : 0.01 |                   |        |
| loss_129.1125     | : 0.01 |                   |        |
| loss_131.1125     | : 0.01 |                   |        |
| fragment_144.0625 | : 0.01 |                   |        |
| loss_159.0775     | : 0.01 |                   |        |
| loss_190.8225     | : 0.01 |                   |        |
| fragment_284.7175 | : 0.01 |                   |        |
| fragment_312.0775 | : 0.01 |                   |        |
| fragment_351.2875 | : 0.01 |                   |        |



gnps\_motif\_67.m2m

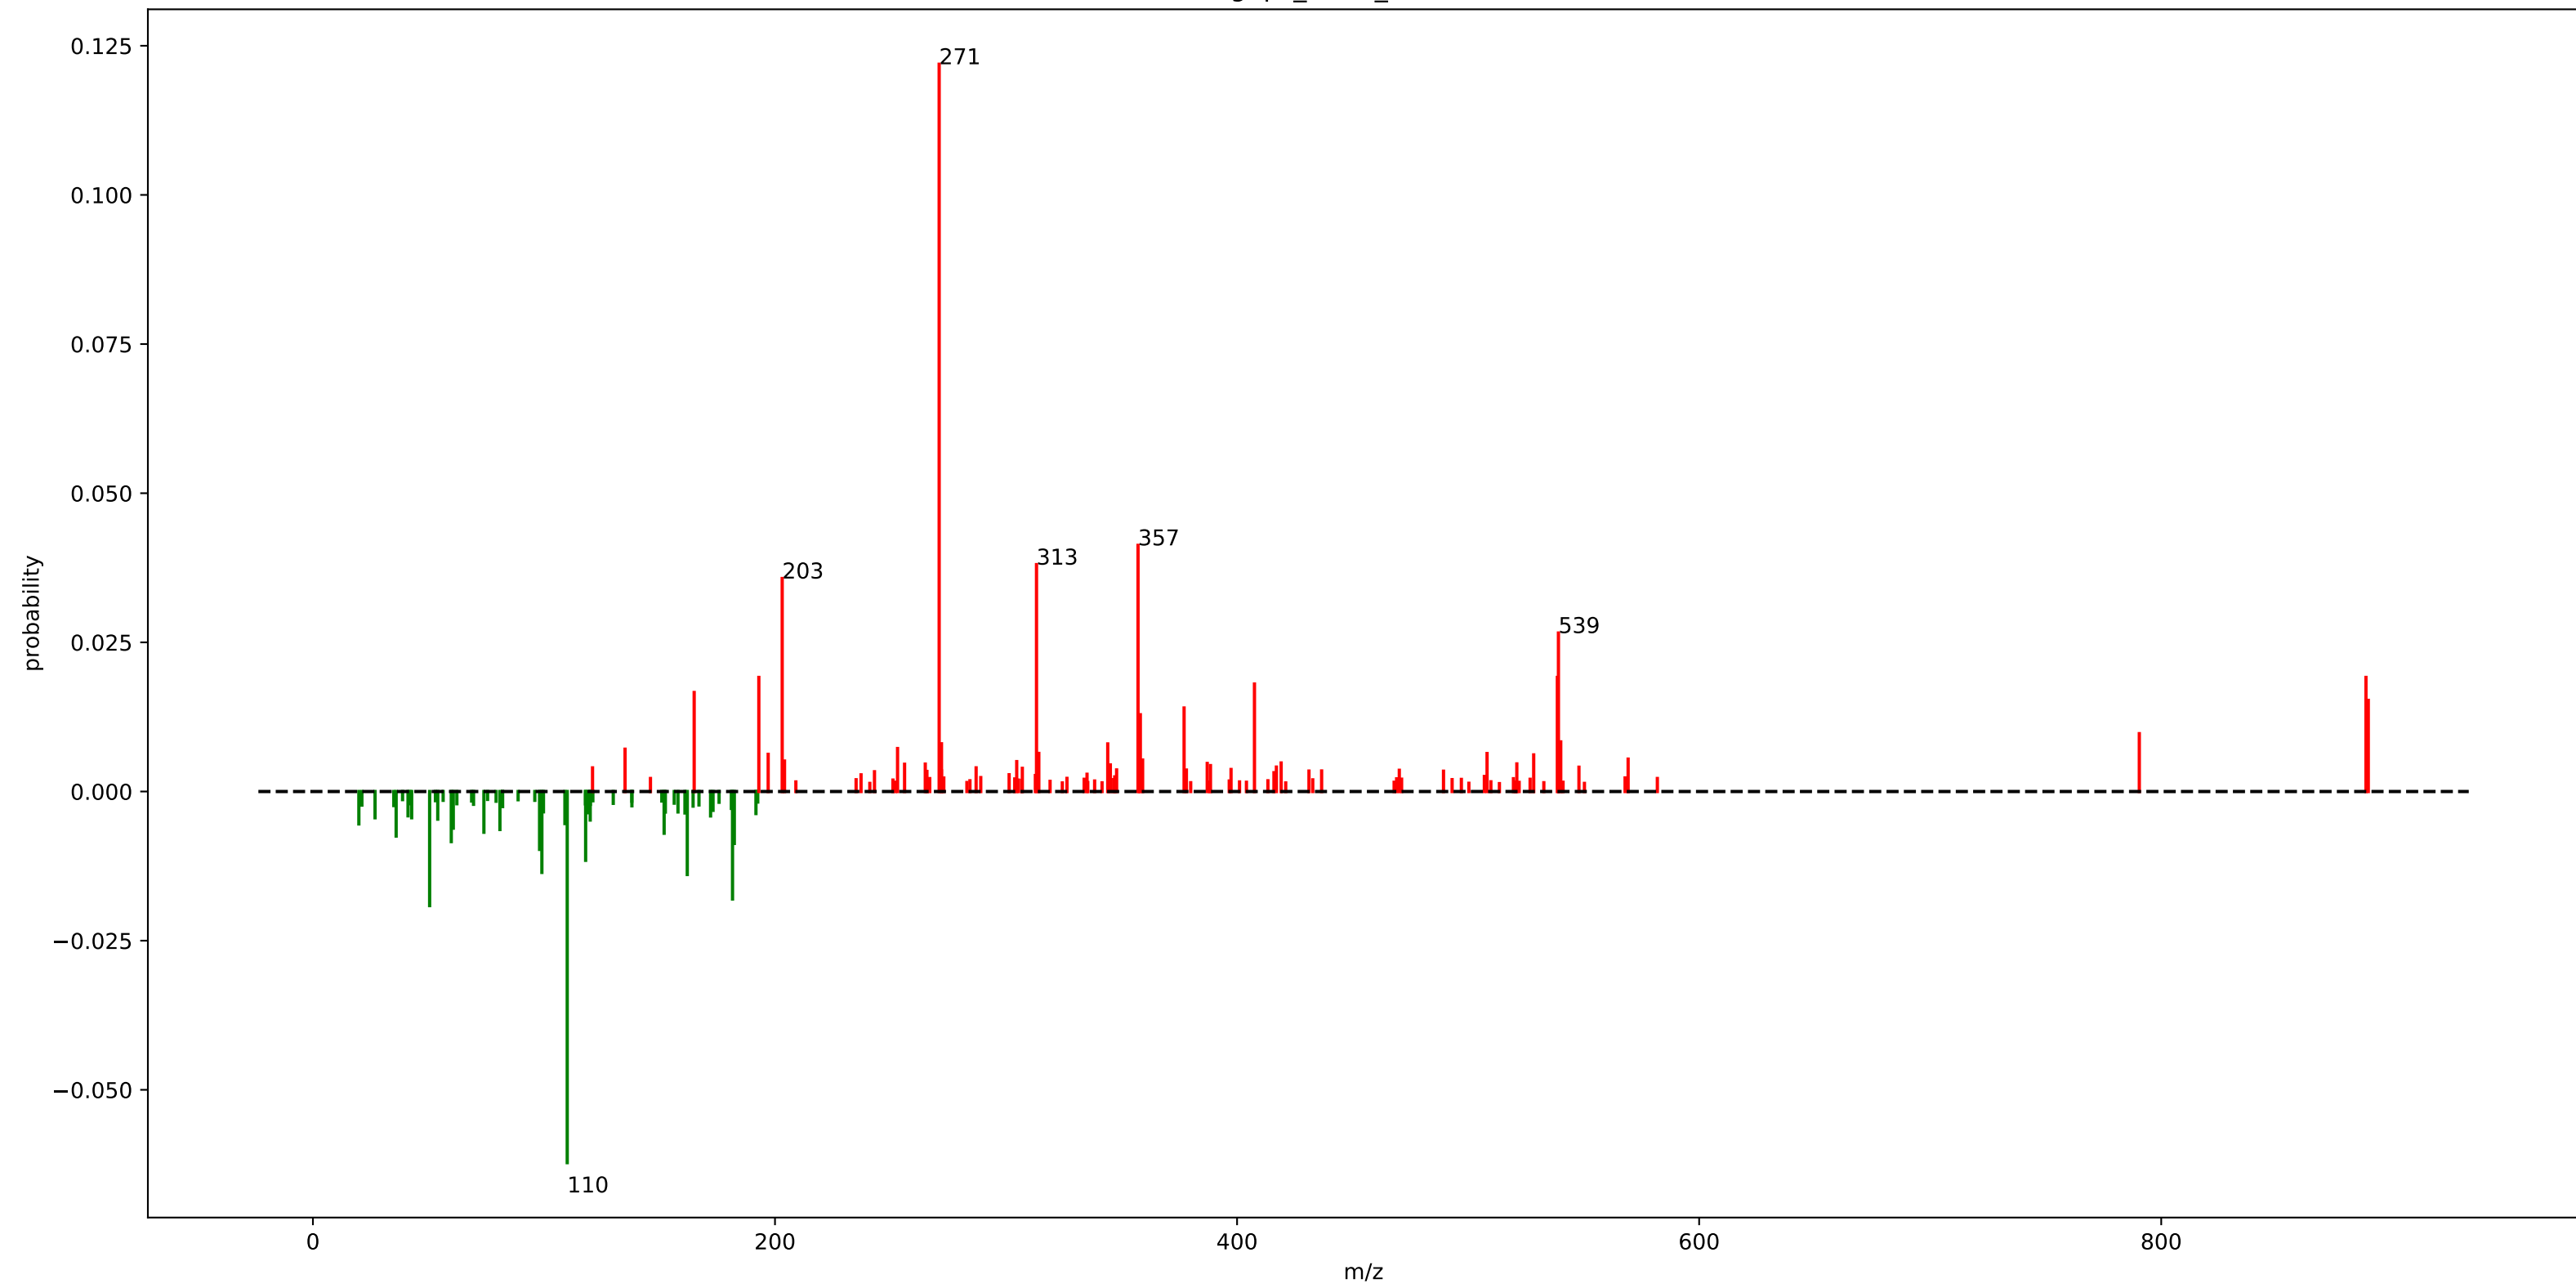

# gnps\_motif\_67.m2m

|                   |        |                   |        |                   |        |
|-------------------|--------|-------------------|--------|-------------------|--------|
| fragment_271.0575 | : 0.12 | loss_98.1025      | : 0.01 | fragment_359.1225 | : 0.01 |
| loss_110.0725     | : 0.06 | loss_182.3925     | : 0.01 | fragment_204.1225 | : 0.01 |
| fragment_357.1325 | : 0.04 | loss_59.8875      | : 0.01 | fragment_304.6275 | : 0.01 |
| fragment_313.1925 | : 0.04 | fragment_540.0975 | : 0.01 |                   |        |
| fragment_203.1175 | : 0.04 | fragment_272.0675 | : 0.01 |                   |        |
| fragment_539.0975 | : 0.03 | fragment_344.0225 | : 0.01 |                   |        |
| fragment_538.6225 | : 0.02 | loss_36.0225      | : 0.01 |                   |        |
| loss_50.5175      | : 0.02 | fragment_253.0475 | : 0.01 |                   |        |
| fragment_888.6125 | : 0.02 | fragment_135.1025 | : 0.01 |                   |        |
| fragment_193.0075 | : 0.02 | loss_152.0125     | : 0.01 |                   |        |
| loss_181.6175     | : 0.02 | loss_74.0075      | : 0.01 |                   |        |
| fragment_407.5275 | : 0.02 | fragment_314.1925 | : 0.01 |                   |        |
| fragment_165.0175 | : 0.02 | fragment_508.2025 | : 0.01 |                   |        |
| fragment_889.6175 | : 0.02 | loss_80.9425      | : 0.01 |                   |        |
| fragment_377.0675 | : 0.01 | fragment_197.0525 | : 0.01 |                   |        |
| loss_162.0325     | : 0.01 | loss_60.7525      | : 0.01 |                   |        |
| loss_99.1025      | : 0.01 | fragment_528.3875 | : 0.01 |                   |        |
| fragment_358.1325 | : 0.01 | fragment_569.2575 | : 0.01 |                   |        |
| loss_118.0425     | : 0.01 | loss_19.8875      | : 0.01 |                   |        |
| fragment_790.5125 | : 0.01 | loss_109.0725     | : 0.01 |                   |        |

motif\_438

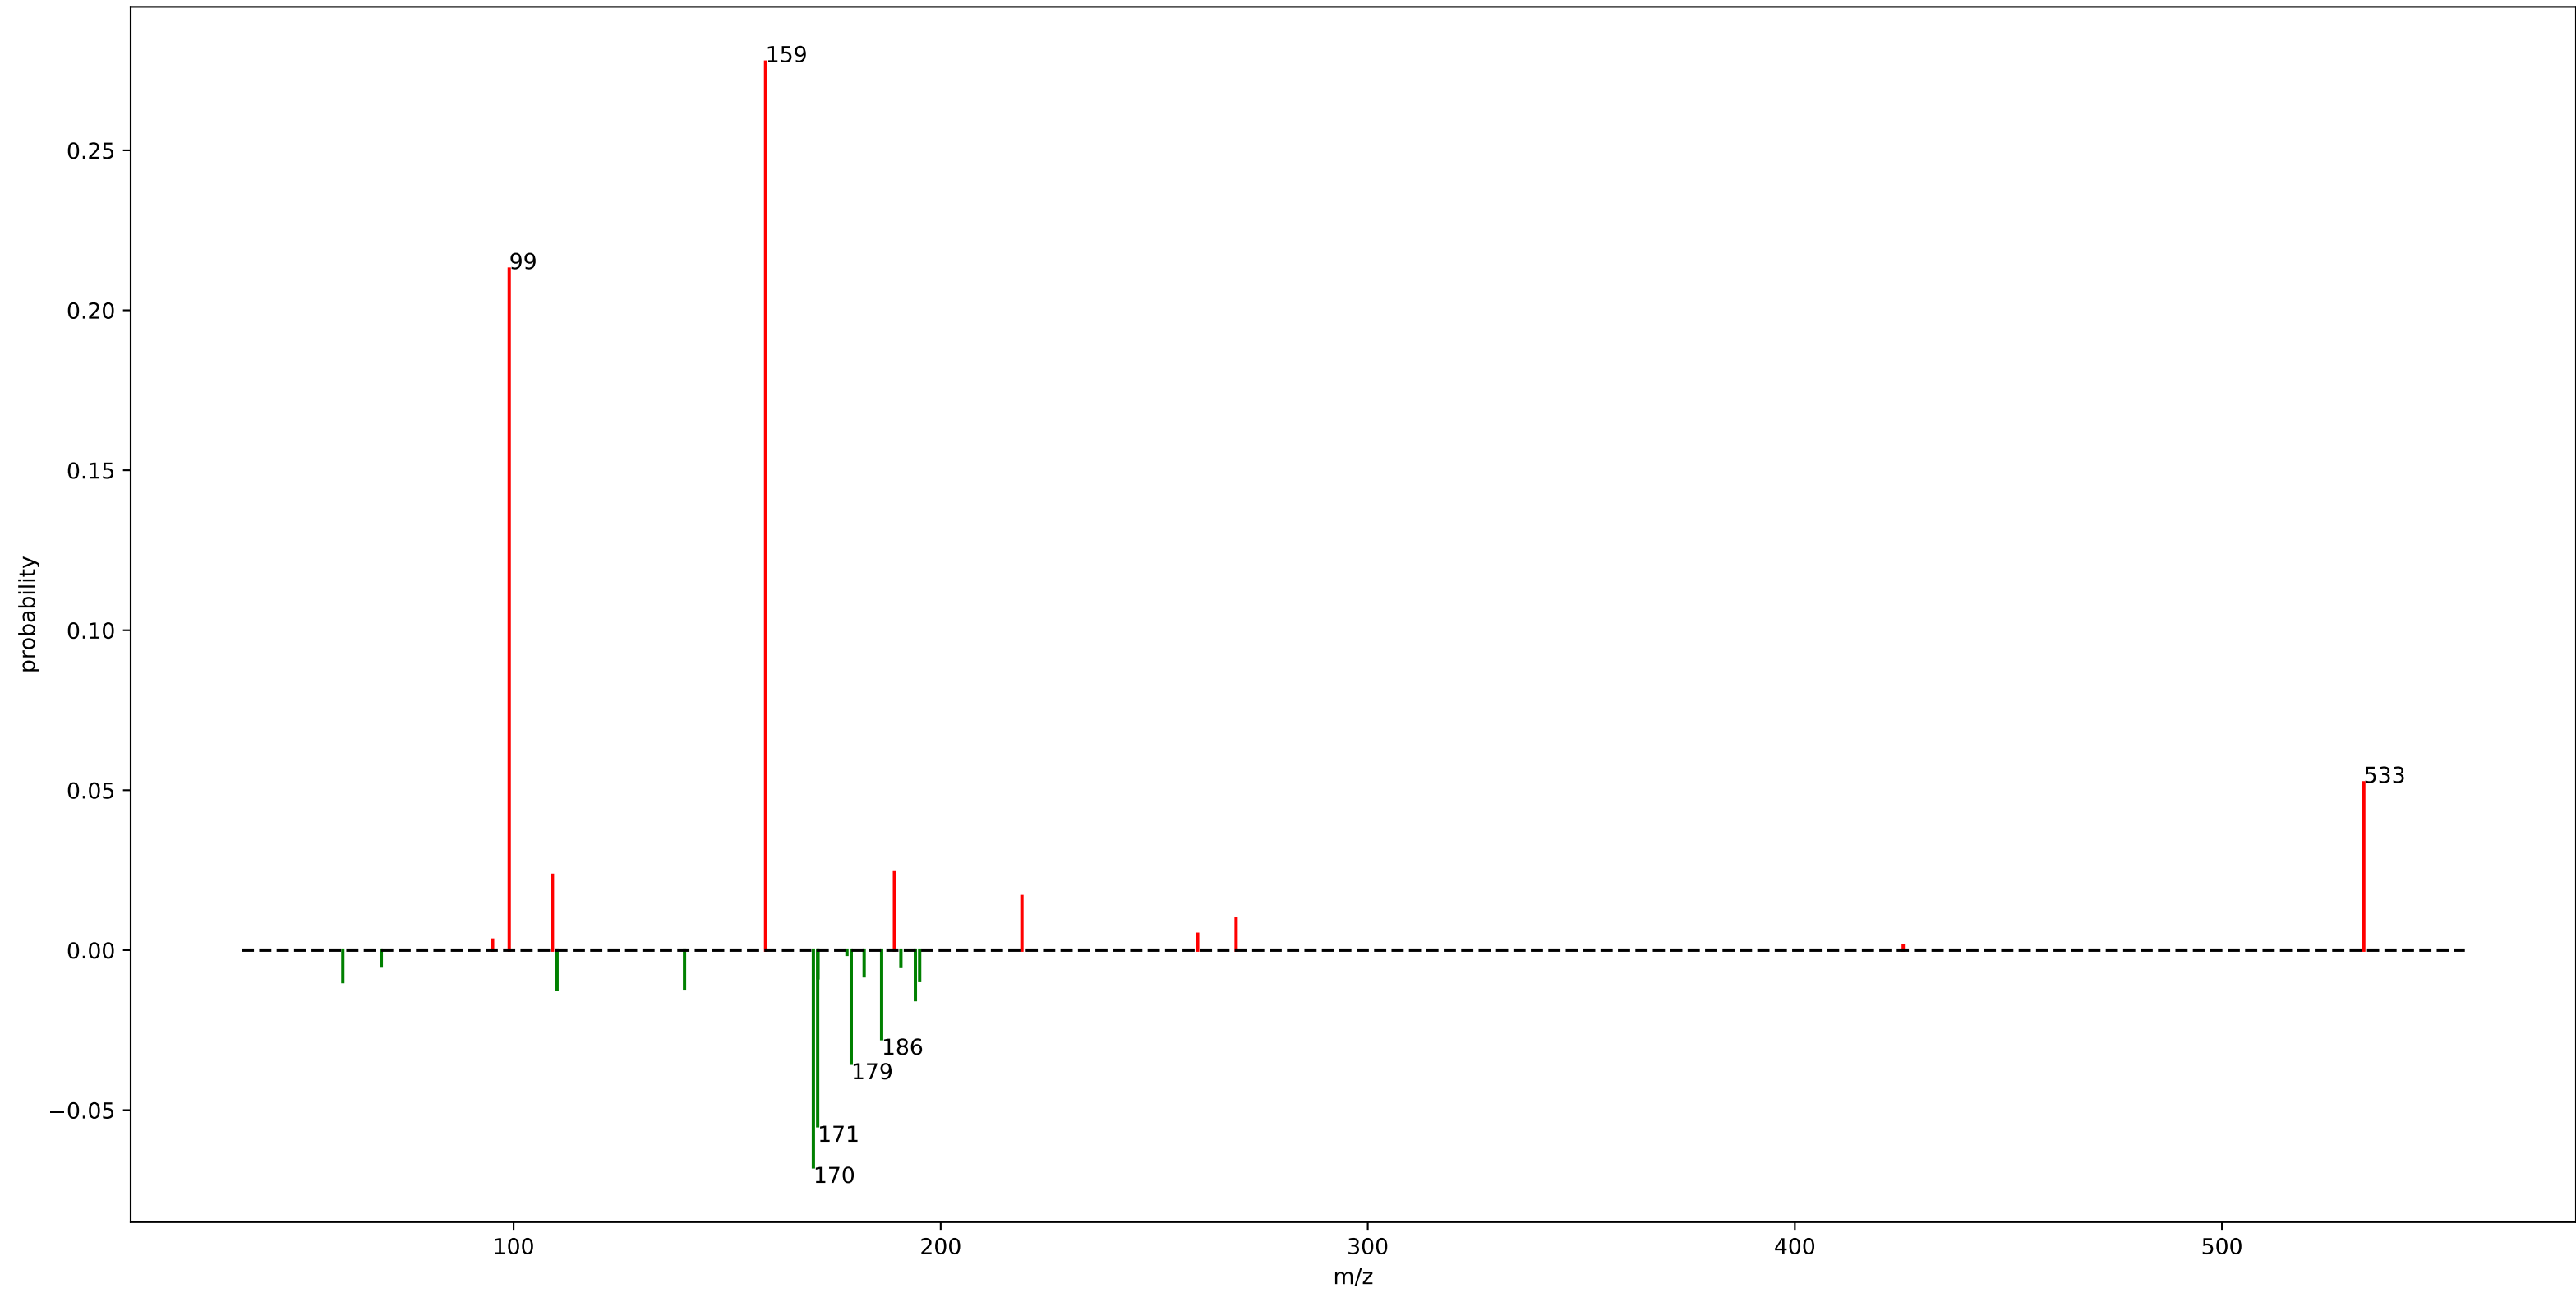

## motif\_438

|                   |        |
|-------------------|--------|
| fragment_158.9975 | : 0.28 |
| fragment_98.9725  | : 0.21 |
| loss_170.1925     | : 0.07 |
| loss_171.1975     | : 0.05 |
| fragment_533.2175 | : 0.05 |
| loss_179.0575     | : 0.04 |
| loss_186.1675     | : 0.03 |
| fragment_189.1625 | : 0.02 |
| fragment_109.0975 | : 0.02 |
| fragment_219.0175 | : 0.02 |
| loss_194.0725     | : 0.02 |
| loss_110.1725     | : 0.01 |
| loss_140.0225     | : 0.01 |
| loss_60.0125      | : 0.01 |
| fragment_269.1725 | : 0.01 |
| loss_195.0775     | : 0.01 |
| loss_171.2675     | : 0.01 |
| loss_182.0775     | : 0.01 |
| loss_190.6825     | : 0.01 |

motif\_439

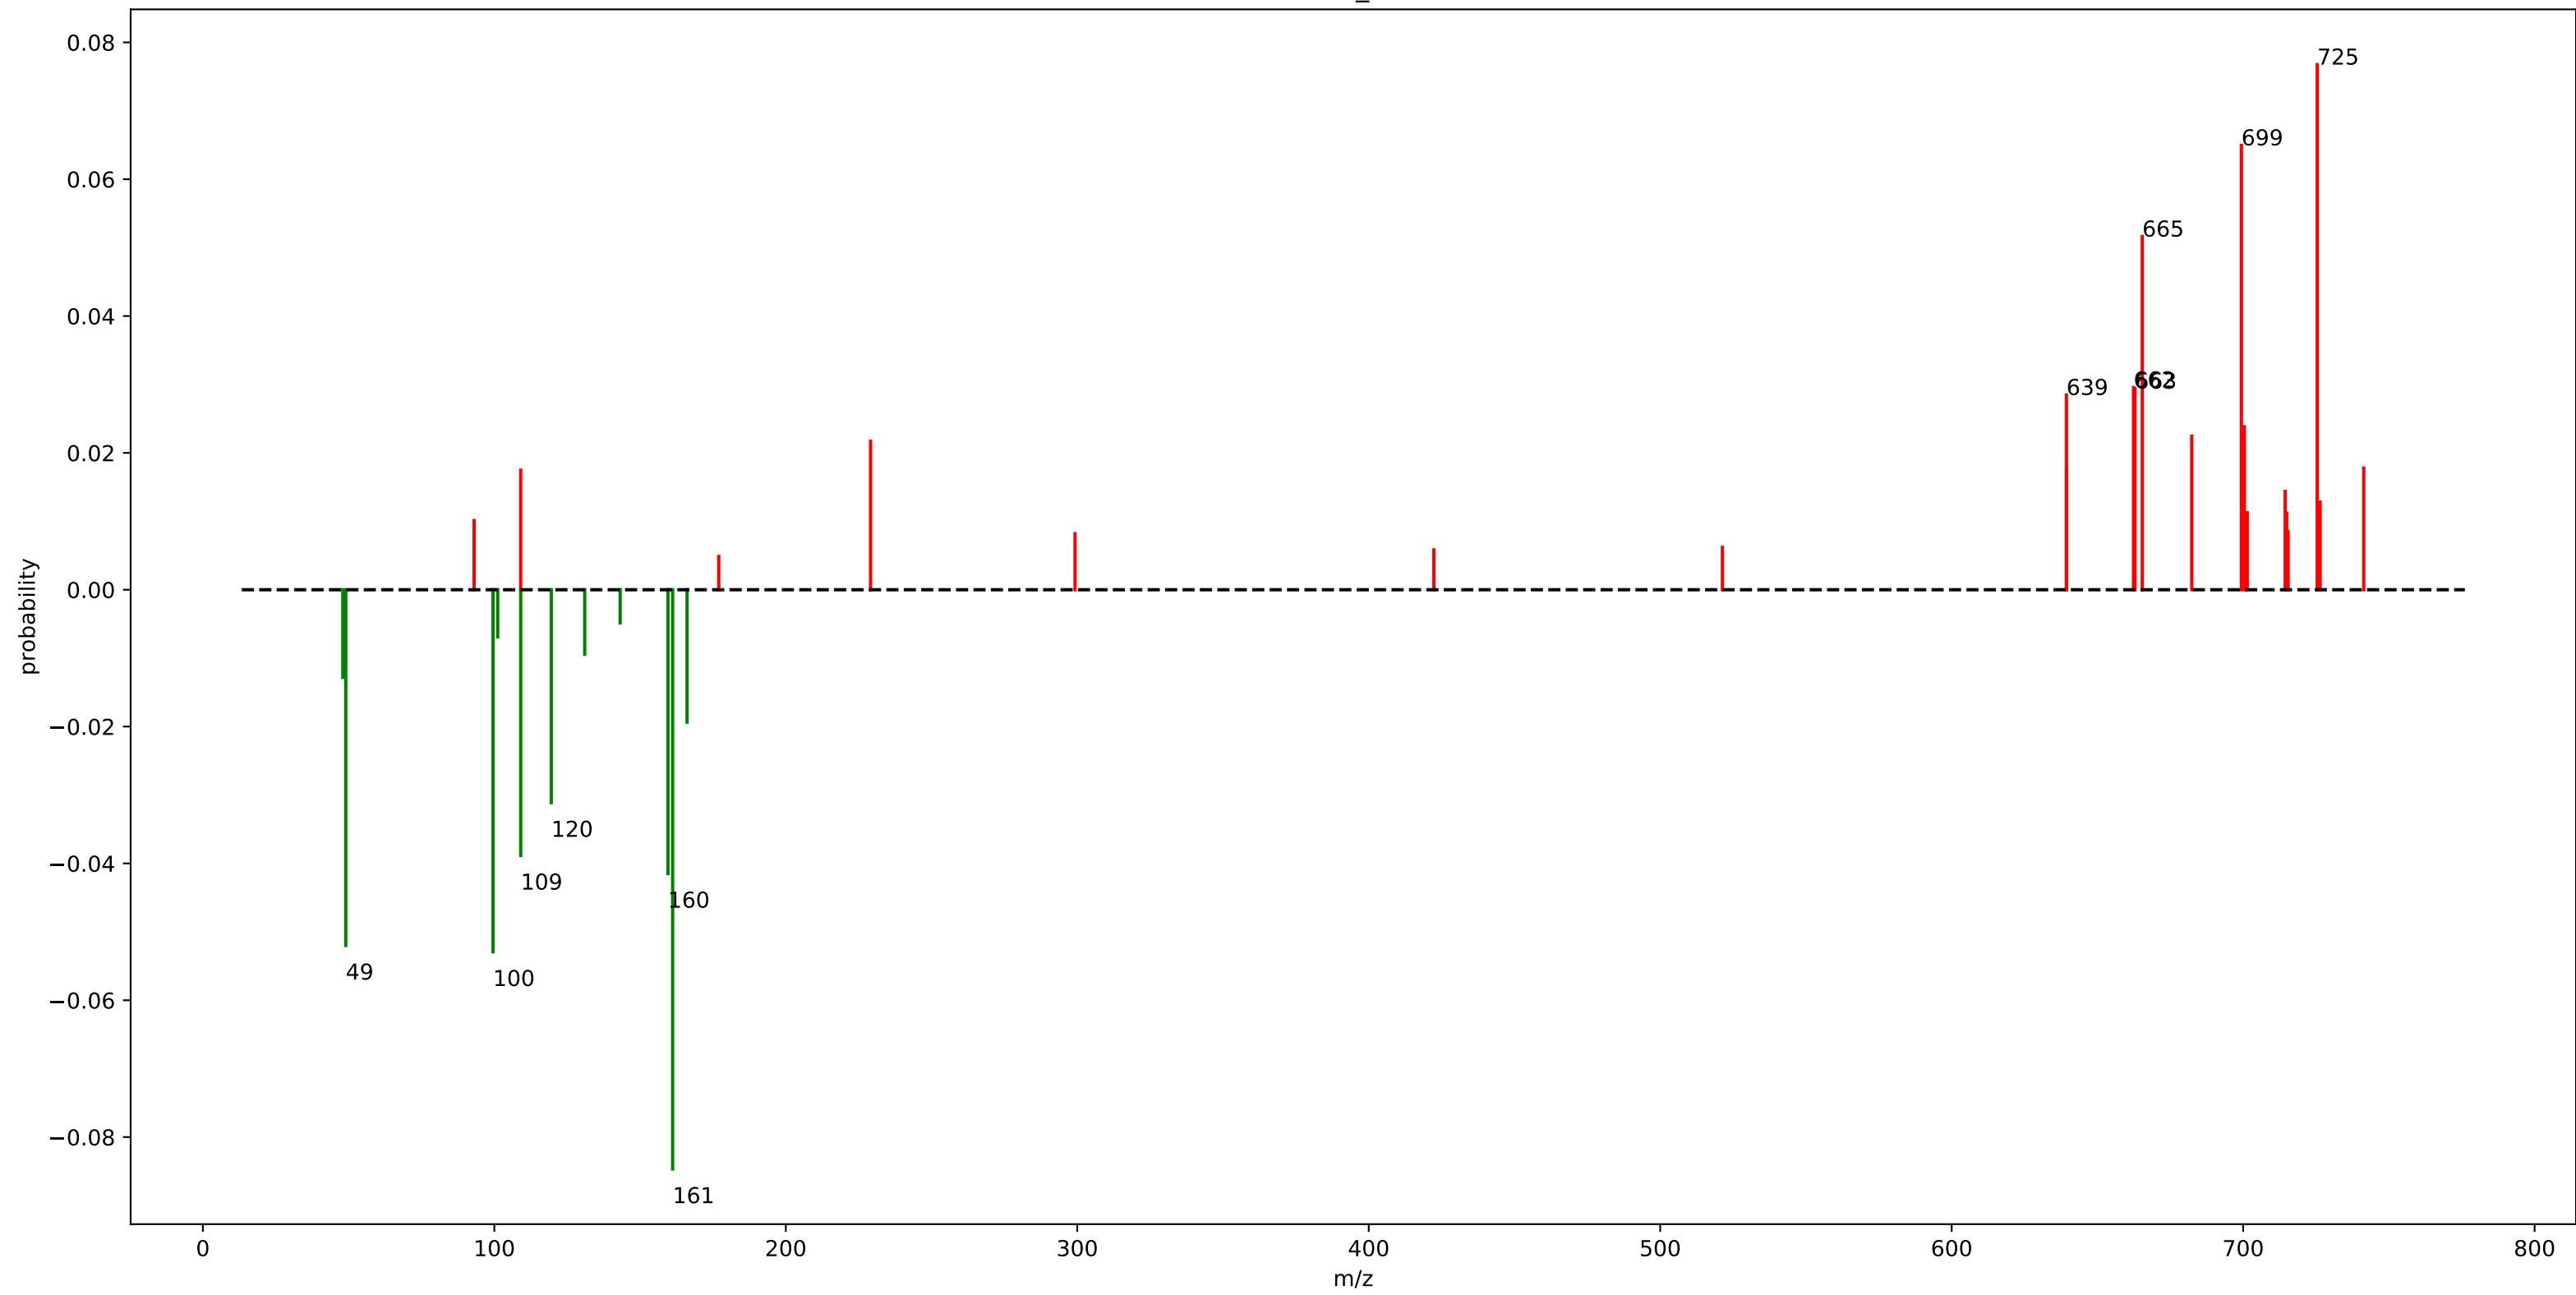

# motif\_439

|                   |        |                   |        |
|-------------------|--------|-------------------|--------|
| loss_161.1825     | : 0.08 | loss_48.0275      | : 0.01 |
| fragment_725.4125 | : 0.08 | fragment_726.4125 | : 0.01 |
| fragment_699.3975 | : 0.06 | fragment_701.4025 | : 0.01 |
| loss_99.5425      | : 0.05 | fragment_714.9275 | : 0.01 |
| loss_49.0325      | : 0.05 | fragment_93.0675  | : 0.01 |
| fragment_665.3925 | : 0.05 | loss_131.0175     | : 0.01 |
| loss_159.5625     | : 0.04 | fragment_715.4275 | : 0.01 |
| loss_109.0525     | : 0.04 | fragment_299.2375 | : 0.01 |
| loss_119.5375     | : 0.03 | loss_101.1625     | : 0.01 |
| fragment_662.3975 | : 0.03 | fragment_521.3475 | : 0.01 |
| fragment_662.8975 | : 0.03 | fragment_422.3525 | : 0.01 |
| fragment_639.3725 | : 0.03 |                   |        |
| fragment_700.4025 | : 0.02 |                   |        |
| fragment_682.3725 | : 0.02 |                   |        |
| fragment_229.0825 | : 0.02 |                   |        |
| loss_166.1325     | : 0.02 |                   |        |
| fragment_639.3775 | : 0.02 |                   |        |
| fragment_741.3925 | : 0.02 |                   |        |
| fragment_109.0425 | : 0.02 |                   |        |
| fragment_714.4275 | : 0.01 |                   |        |

motif\_533

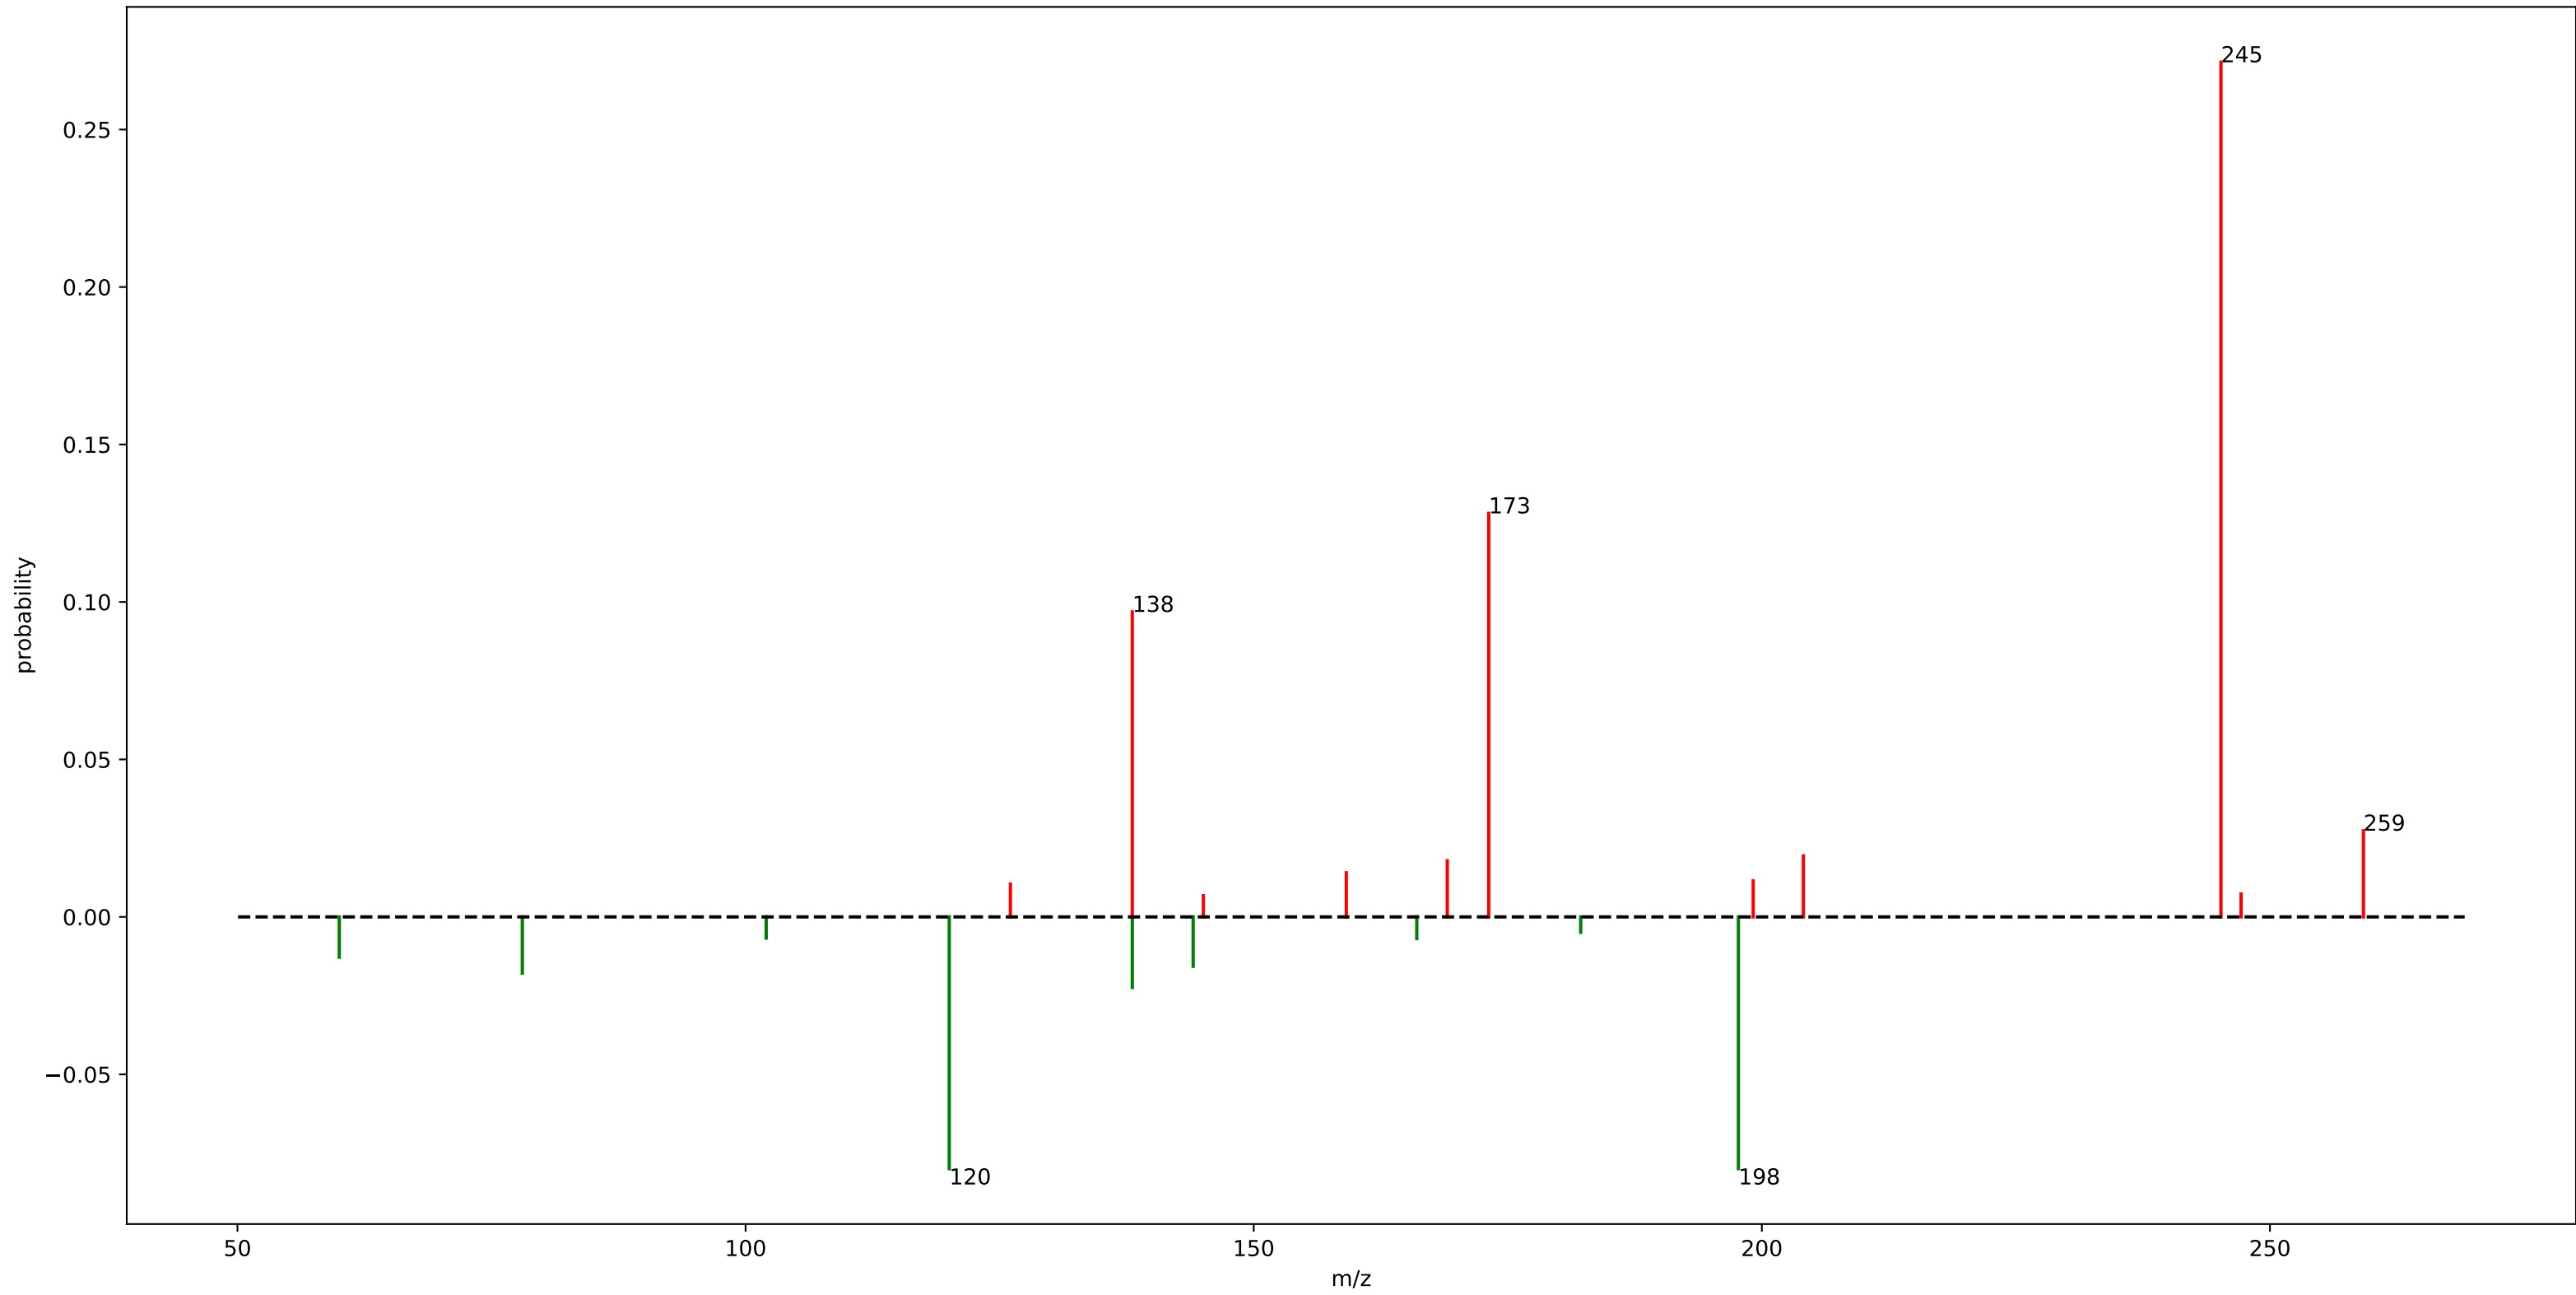

## motif\_533

|                   |        |
|-------------------|--------|
| fragment_245.1825 | : 0.27 |
| fragment_173.1275 | : 0.13 |
| fragment_138.0525 | : 0.10 |
| loss_197.6975     | : 0.08 |
| loss_120.0425     | : 0.08 |
| fragment_259.2025 | : 0.03 |
| loss_138.0525     | : 0.02 |
| fragment_204.0875 | : 0.02 |
| loss_78.0275      | : 0.02 |
| fragment_169.0475 | : 0.02 |
| loss_144.0425     | : 0.02 |
| fragment_159.1125 | : 0.01 |
| loss_60.0175      | : 0.01 |
| fragment_199.1525 | : 0.01 |
| fragment_126.0575 | : 0.01 |
| fragment_247.1625 | : 0.01 |
| loss_166.0475     | : 0.01 |
| loss_102.0275     | : 0.01 |
| fragment_145.0475 | : 0.01 |



motif\_532

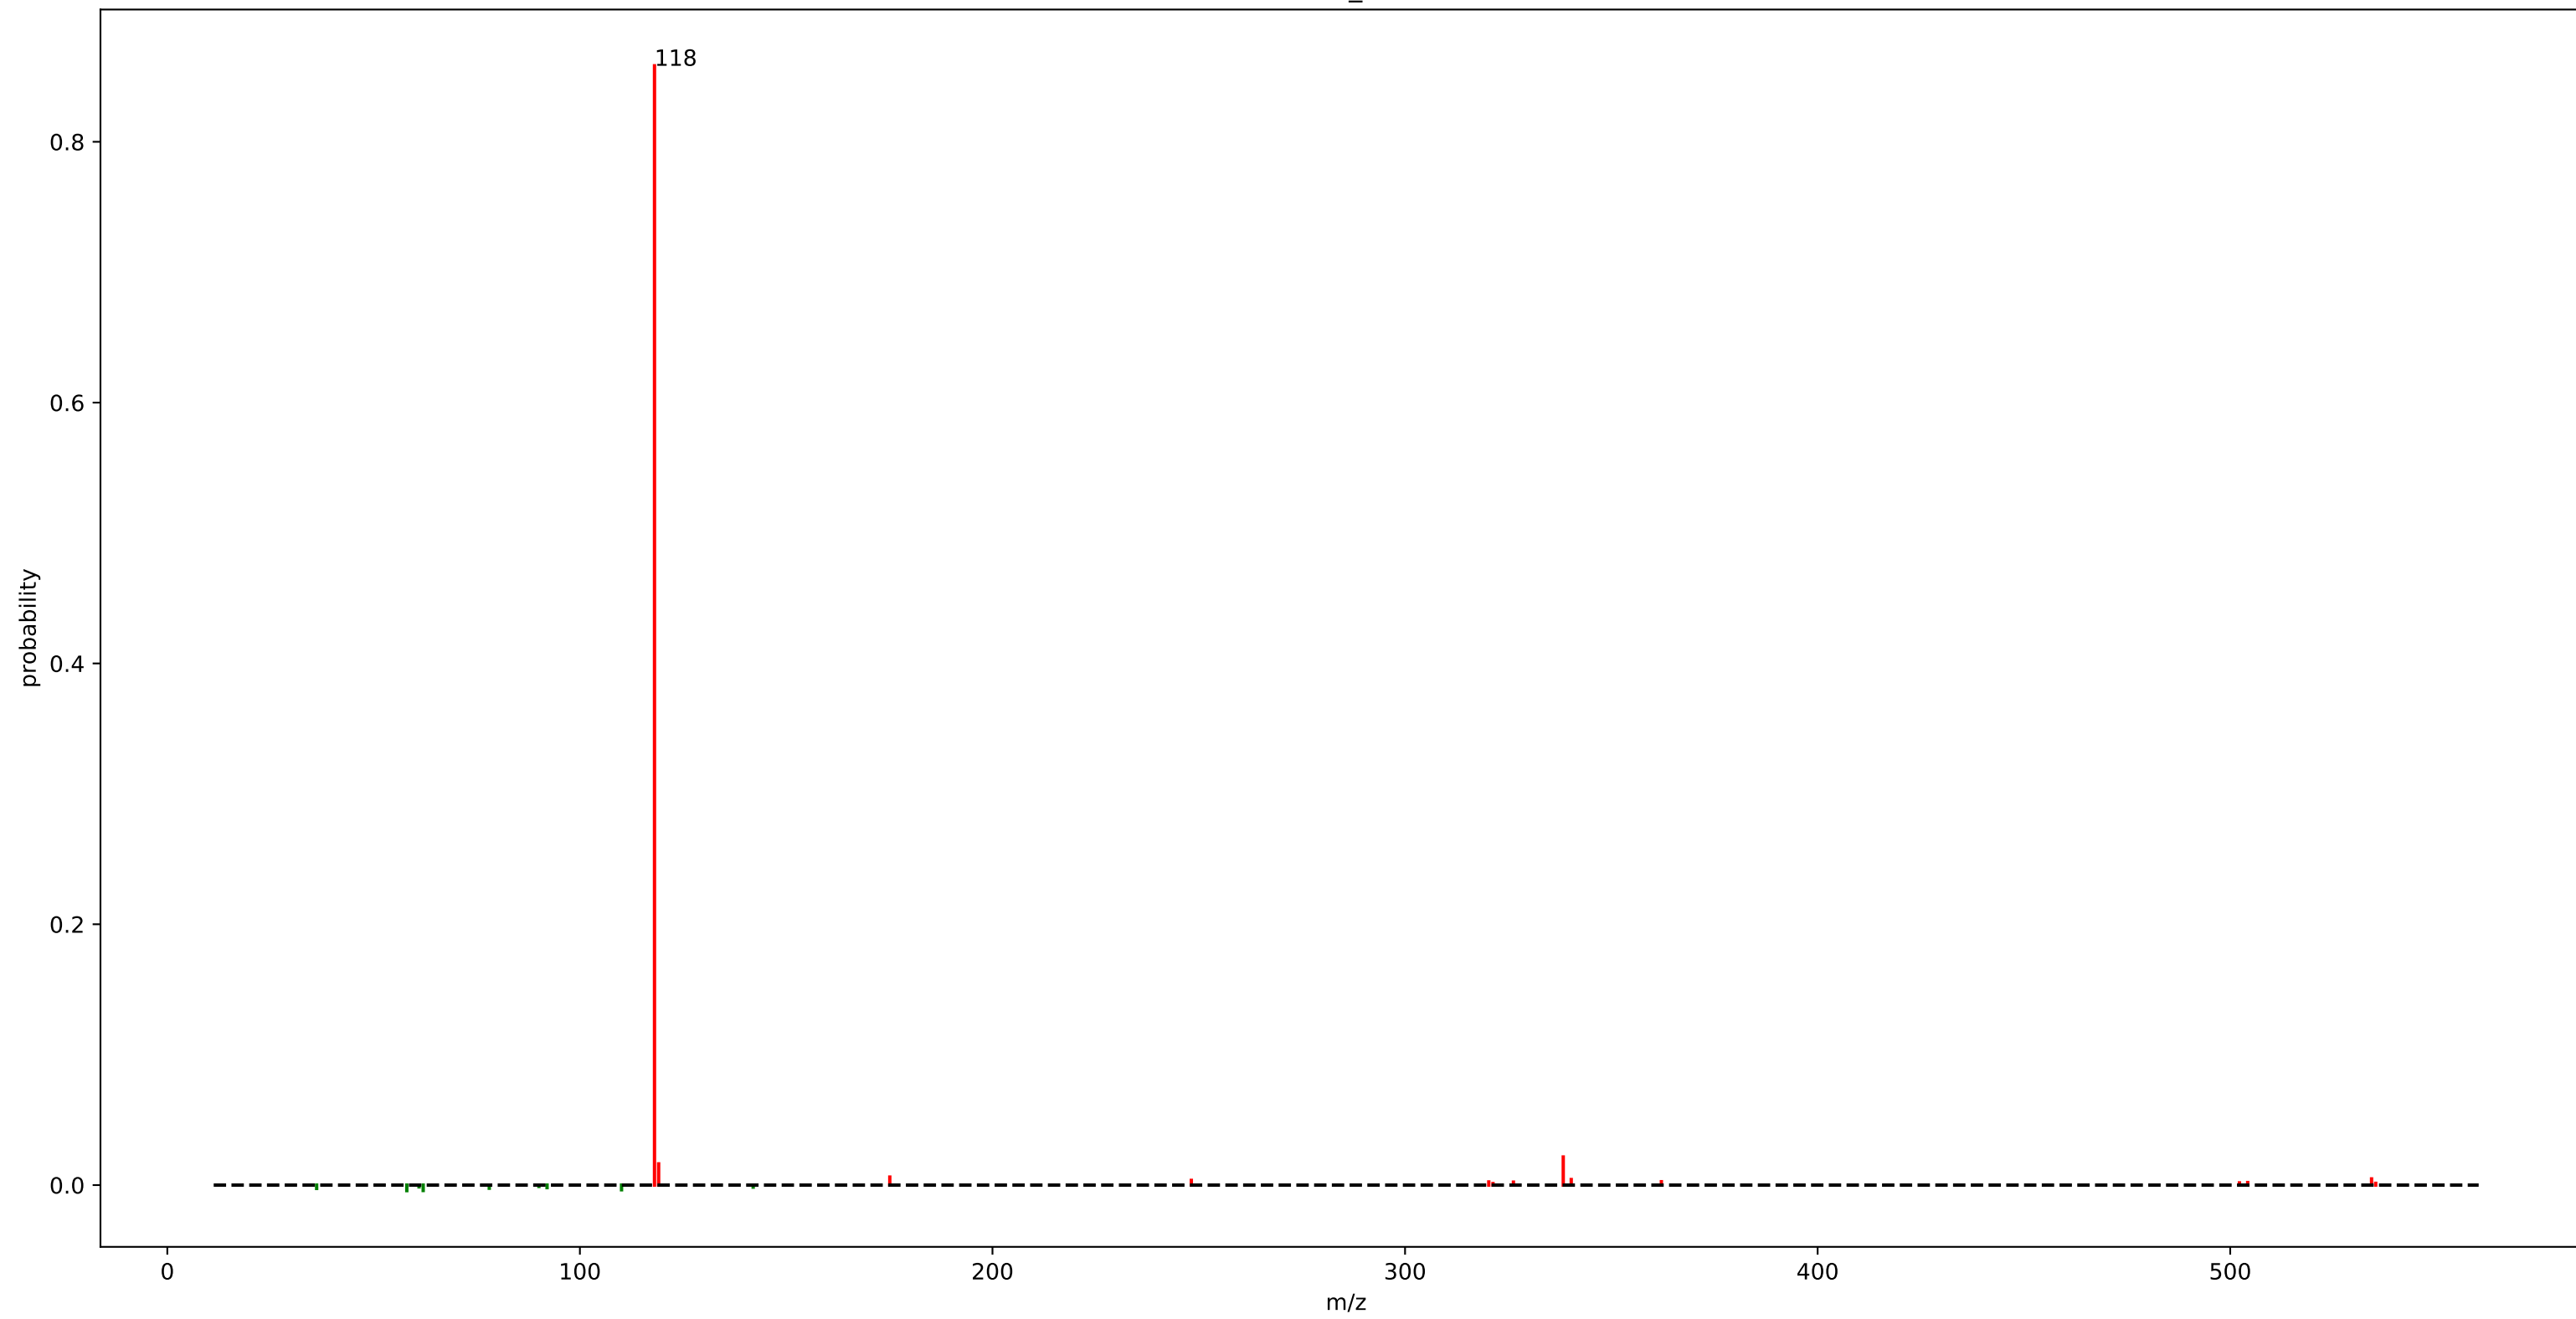

## motif\_532

|                   |        |
|-------------------|--------|
| fragment_118.0825 | : 0.86 |
| fragment_338.3425 | : 0.02 |
| fragment_119.0875 | : 0.02 |
| fragment_175.1125 | : 0.01 |

motif\_535

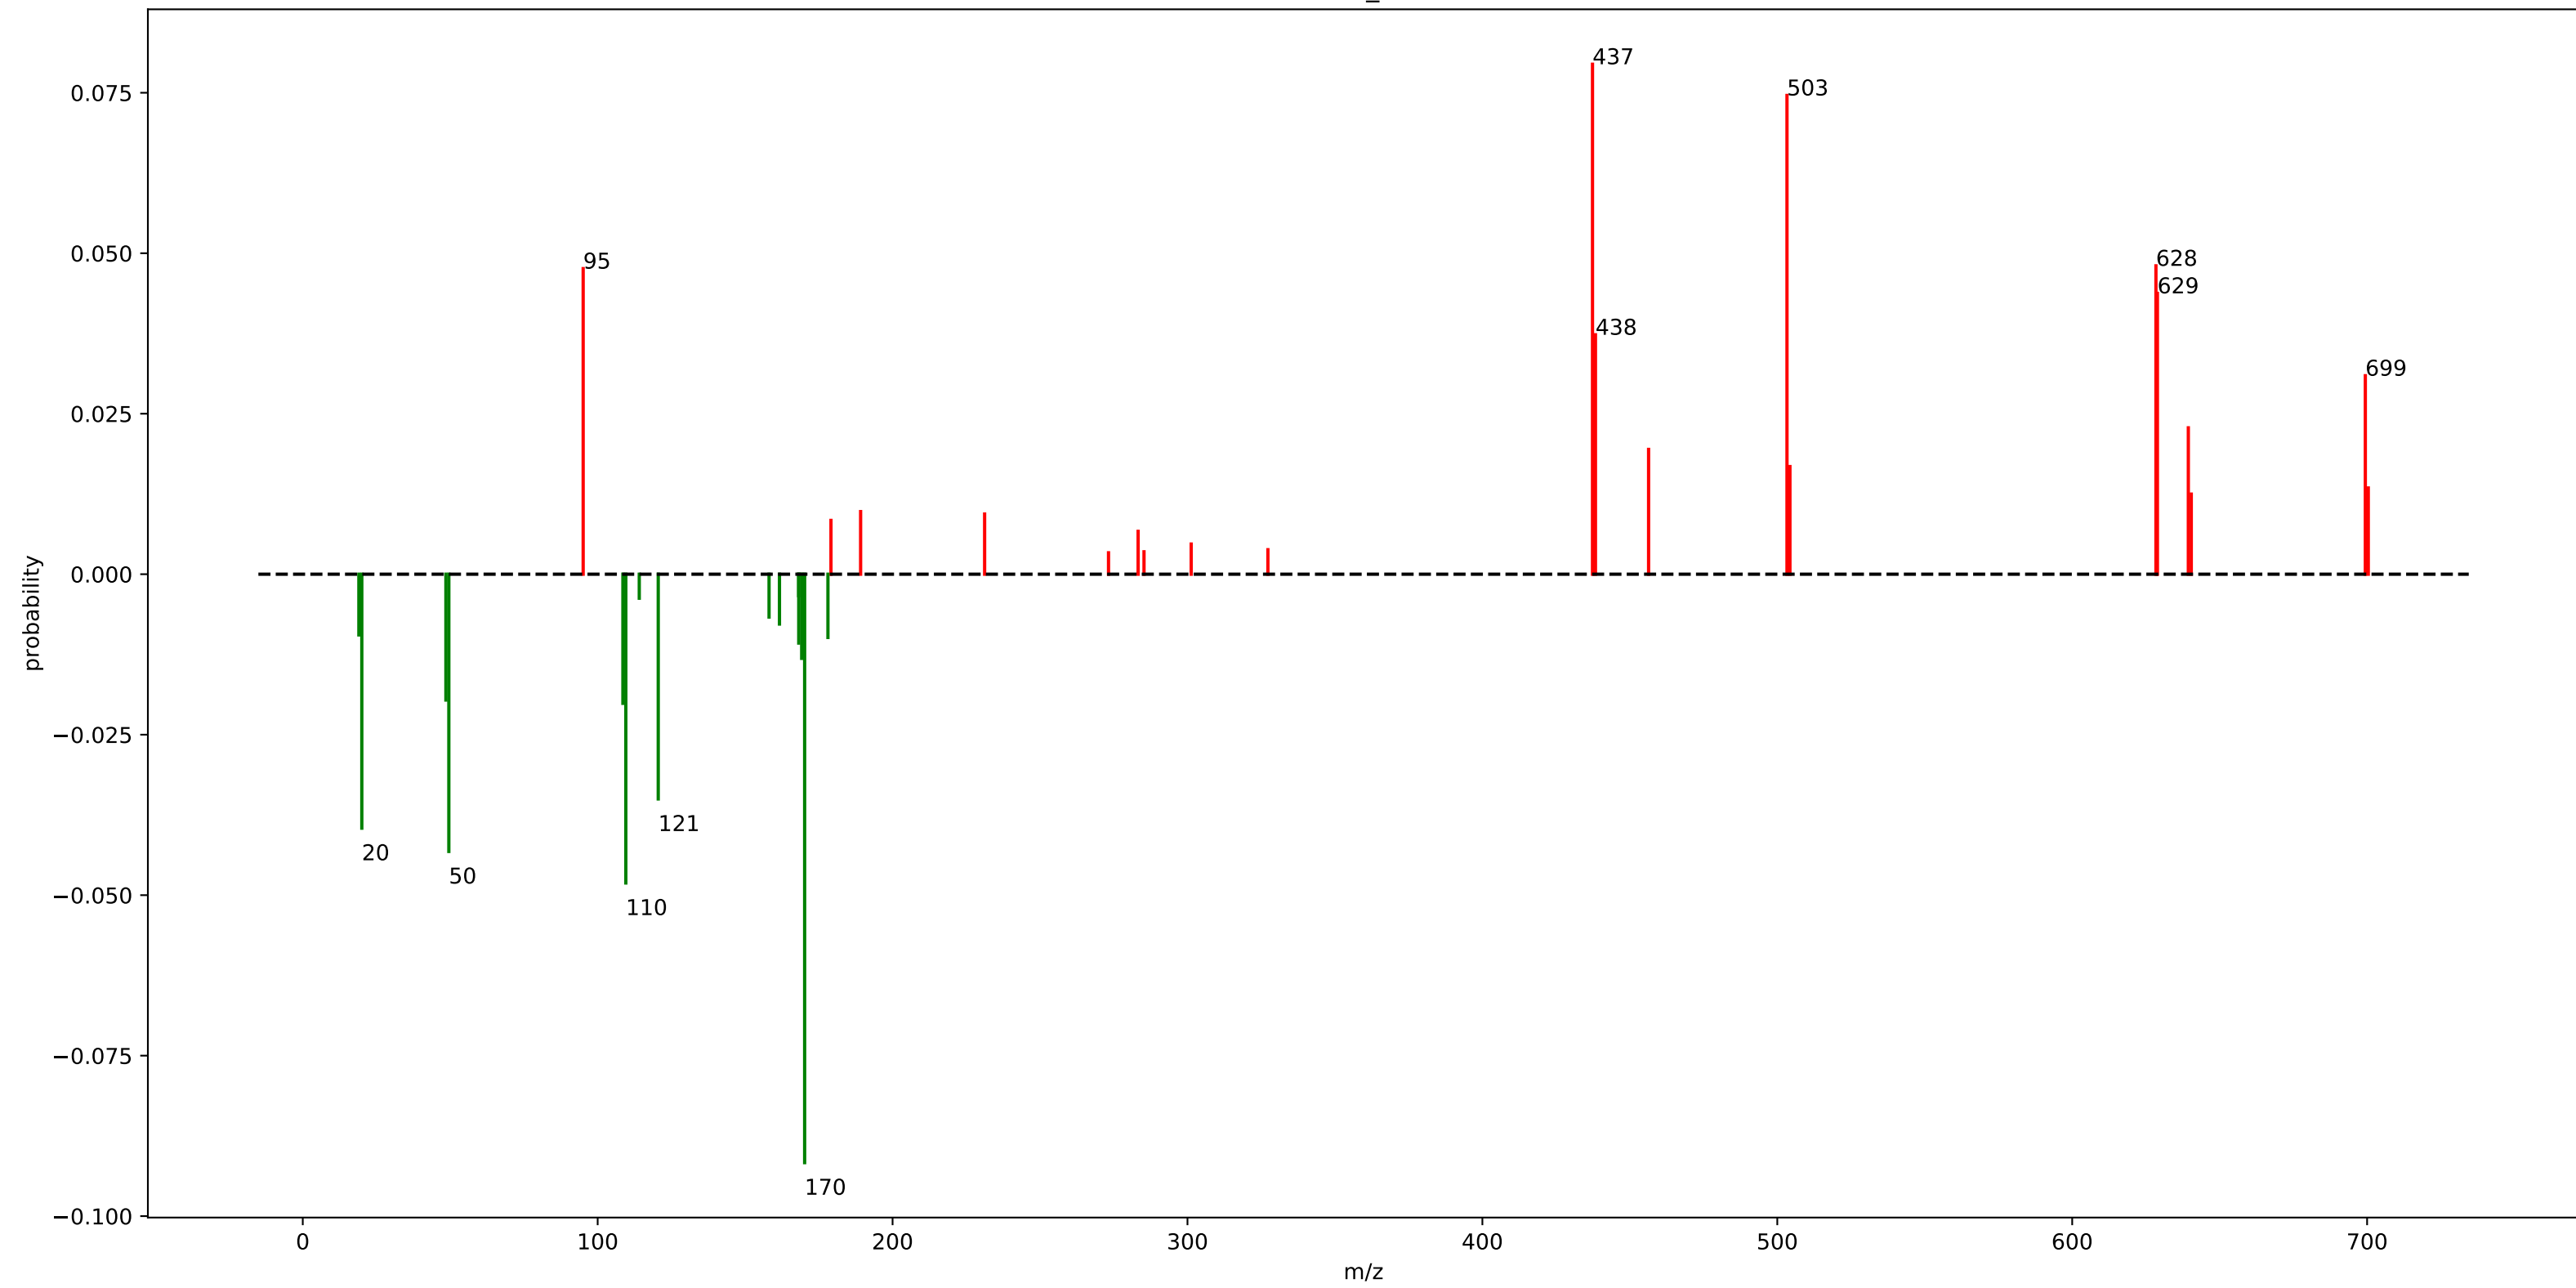

## motif\_535

|                   |        |                   |        |
|-------------------|--------|-------------------|--------|
| loss_170.1825     | : 0.09 | loss_168.1825     | : 0.01 |
| fragment_437.3375 | : 0.08 | loss_178.0825     | : 0.01 |
| fragment_503.2875 | : 0.07 | fragment_189.1625 | : 0.01 |
| loss_109.5525     | : 0.05 | loss_19.0225      | : 0.01 |
| fragment_628.3925 | : 0.05 | fragment_231.2125 | : 0.01 |
| fragment_95.0825  | : 0.05 | fragment_179.1075 | : 0.01 |
| fragment_628.8925 | : 0.04 | loss_161.6475     | : 0.01 |
| loss_49.5325      | : 0.04 | fragment_283.2575 | : 0.01 |
| loss_20.0225      | : 0.04 | loss_158.1125     | : 0.01 |
| fragment_438.3425 | : 0.04 |                   |        |
| loss_120.5375     | : 0.04 |                   |        |
| fragment_699.3975 | : 0.03 |                   |        |
| fragment_639.3775 | : 0.02 |                   |        |
| loss_108.5525     | : 0.02 |                   |        |
| loss_48.5325      | : 0.02 |                   |        |
| fragment_456.3575 | : 0.02 |                   |        |
| fragment_504.2875 | : 0.02 |                   |        |
| fragment_700.3975 | : 0.01 |                   |        |
| loss_169.1775     | : 0.01 |                   |        |
| fragment_640.3775 | : 0.01 |                   |        |

motif\_534

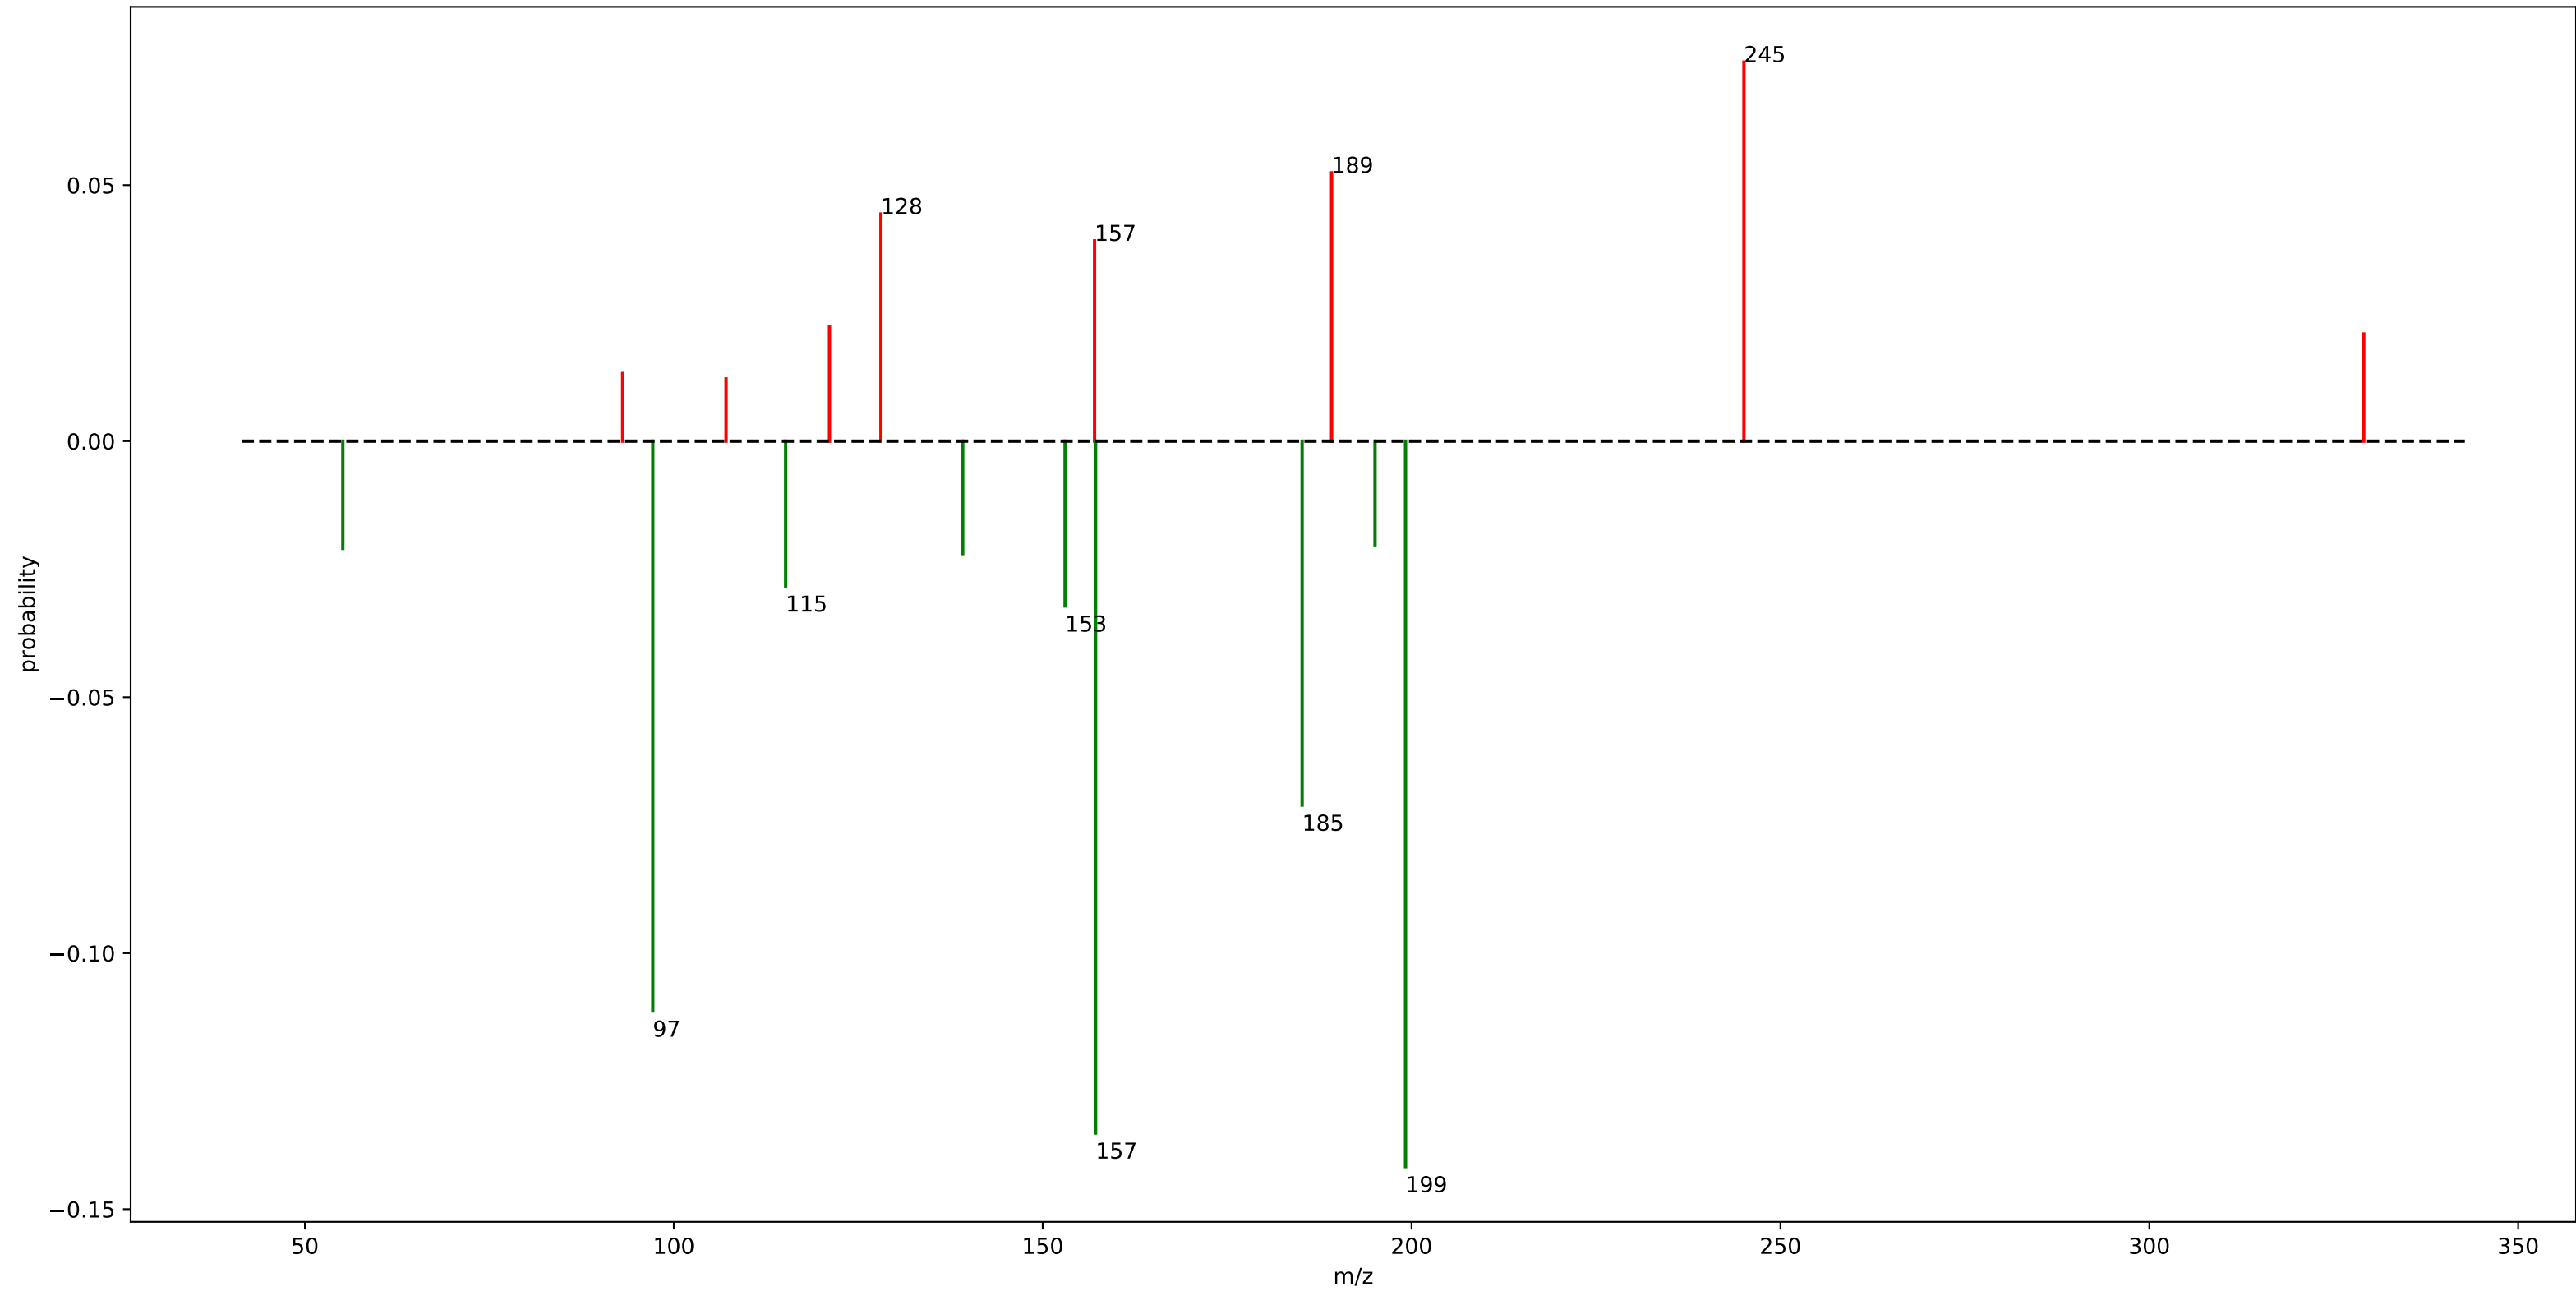

## motif\_534

|                   |        |
|-------------------|--------|
| loss_199.1825     | : 0.14 |
| loss_157.1725     | : 0.14 |
| loss_97.1525      | : 0.11 |
| fragment_245.0525 | : 0.07 |
| loss_185.1675     | : 0.07 |
| fragment_189.1625 | : 0.05 |
| fragment_128.0725 | : 0.04 |
| fragment_157.0325 | : 0.04 |
| loss_153.0375     | : 0.03 |
| loss_115.1625     | : 0.03 |
| fragment_121.1025 | : 0.02 |
| loss_139.1625     | : 0.02 |
| loss_55.1425      | : 0.02 |
| fragment_329.0725 | : 0.02 |
| loss_195.0475     | : 0.02 |
| fragment_93.0675  | : 0.01 |
| fragment_107.0825 | : 0.01 |

motif\_537

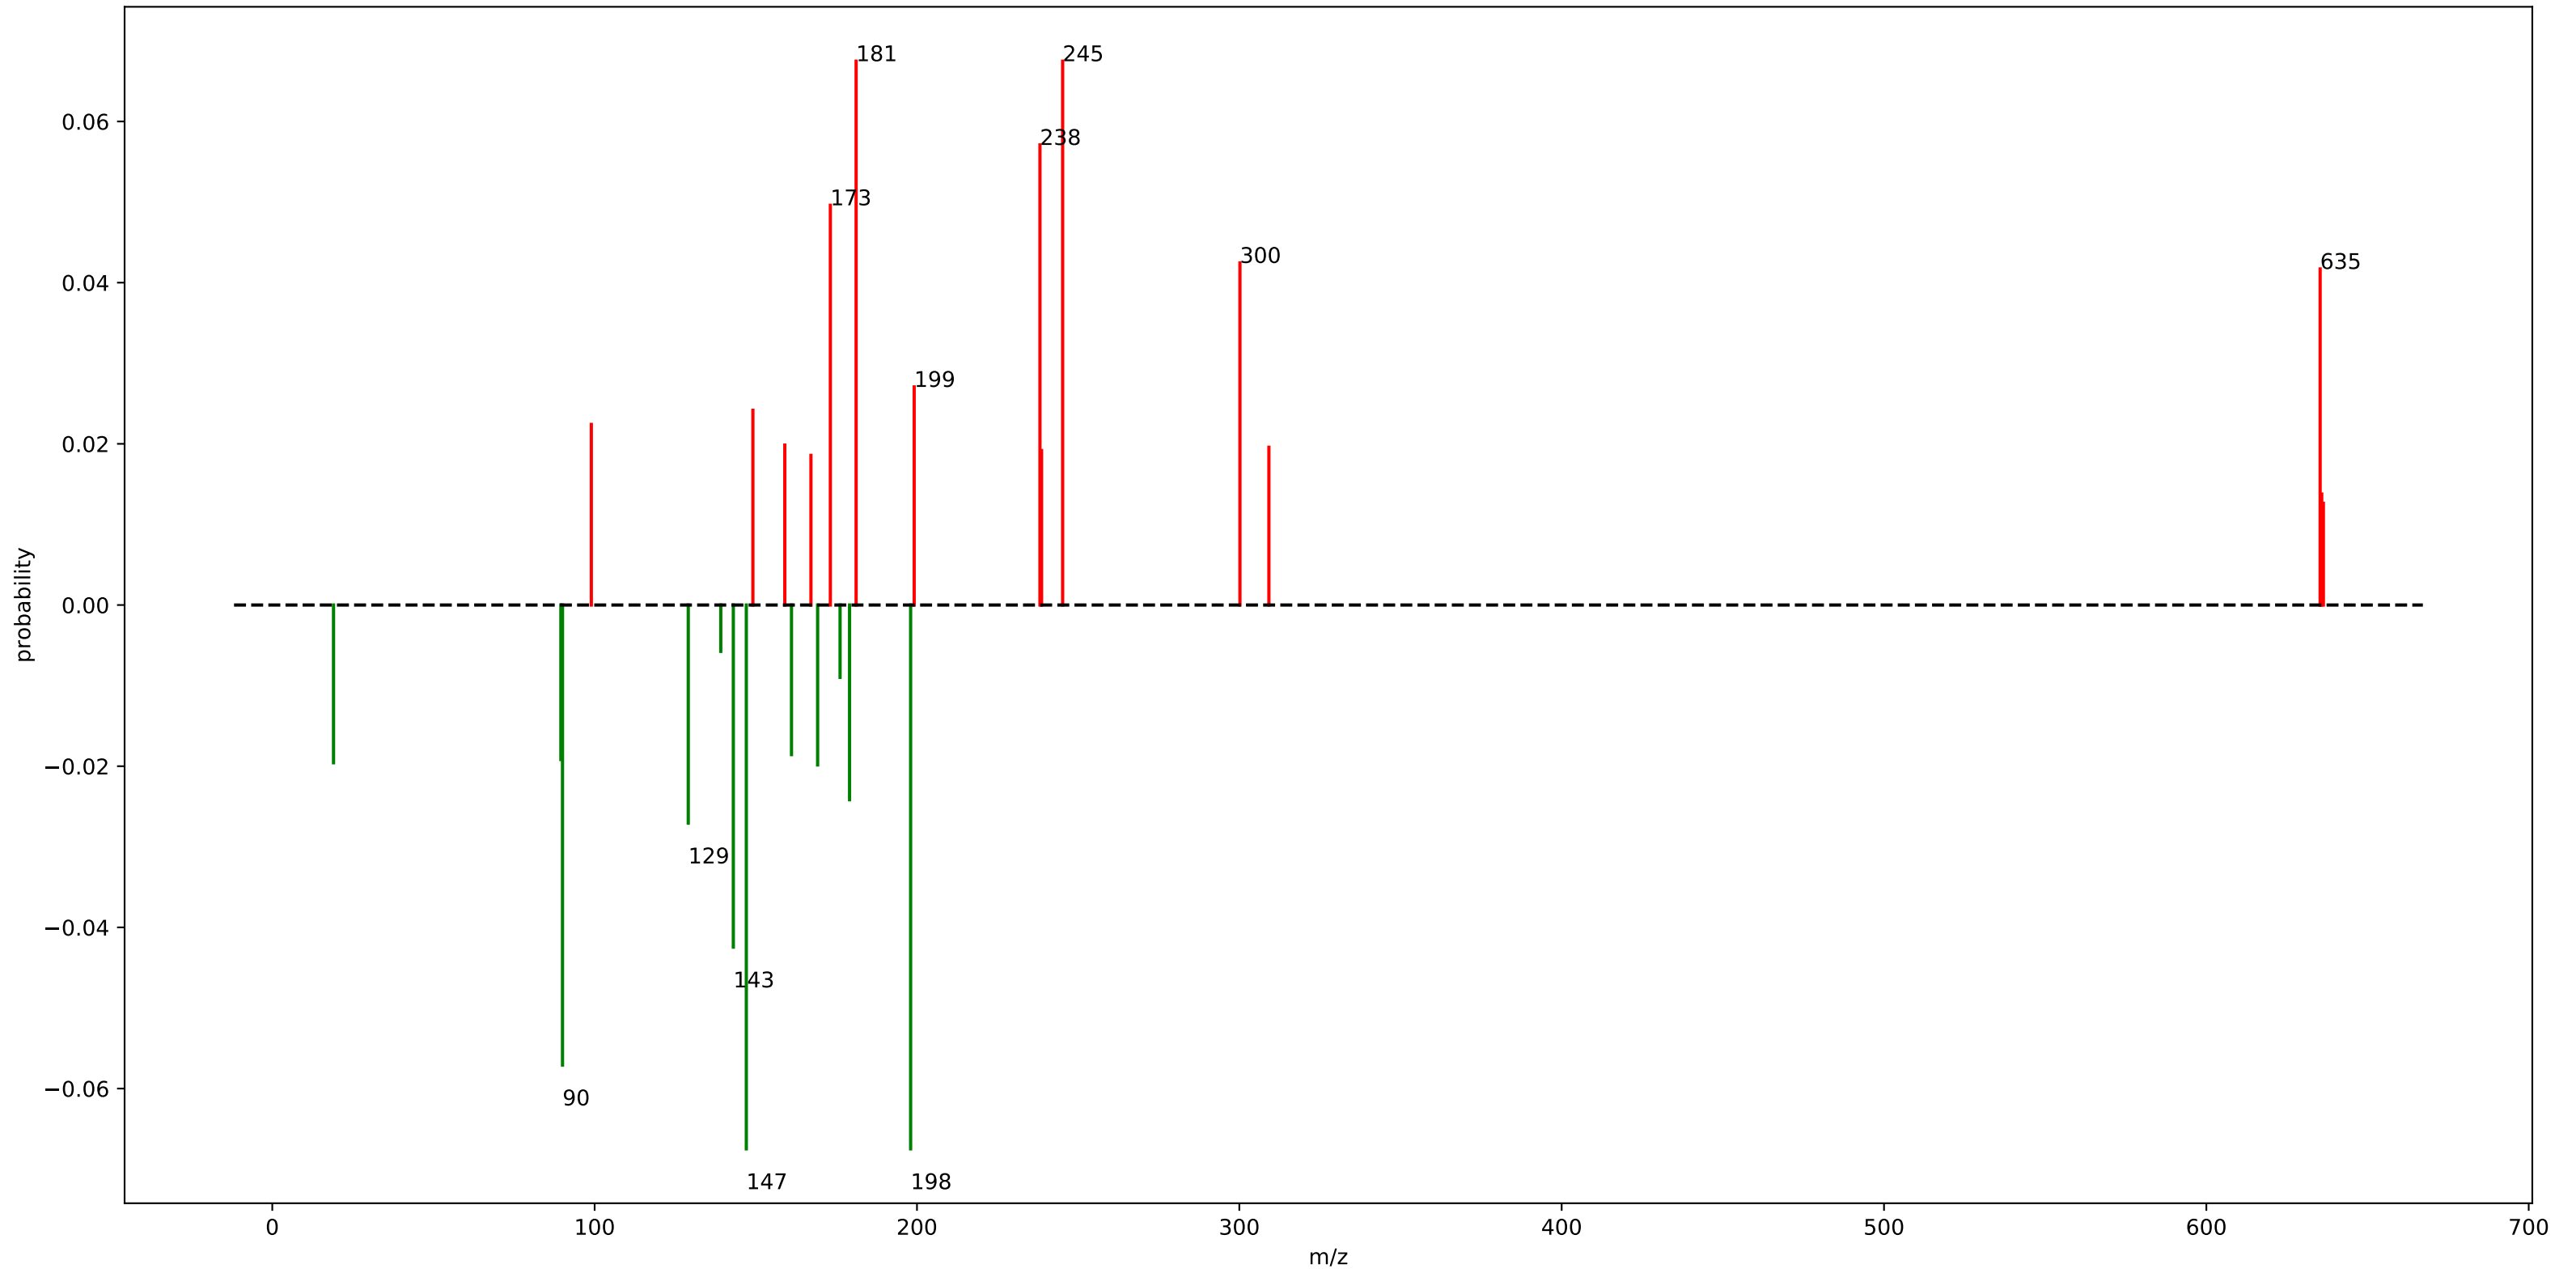

## motif\_537

|                   |        |                   |        |
|-------------------|--------|-------------------|--------|
| loss_198.0325     | : 0.07 | loss_89.5275      | : 0.02 |
| loss_147.0575     | : 0.07 | fragment_167.1075 | : 0.02 |
| fragment_181.1225 | : 0.07 | loss_161.0725     | : 0.02 |
| fragment_245.1875 | : 0.07 | fragment_635.7975 | : 0.01 |
| fragment_238.1475 | : 0.06 | fragment_636.3025 | : 0.01 |
| loss_90.0325      | : 0.06 | loss_176.1425     | : 0.01 |
| fragment_173.1275 | : 0.05 | loss_139.1325     | : 0.01 |
| loss_143.0275     | : 0.04 |                   |        |
| fragment_300.1925 | : 0.04 |                   |        |
| fragment_635.2975 | : 0.04 |                   |        |
| fragment_199.1325 | : 0.03 |                   |        |
| loss_129.0475     | : 0.03 |                   |        |
| loss_179.0825     | : 0.02 |                   |        |
| fragment_149.0975 | : 0.02 |                   |        |
| fragment_98.9725  | : 0.02 |                   |        |
| fragment_158.9975 | : 0.02 |                   |        |
| loss_169.1825     | : 0.02 |                   |        |
| loss_18.9975      | : 0.02 |                   |        |
| fragment_309.1775 | : 0.02 |                   |        |
| fragment_238.6475 | : 0.02 |                   |        |



gnps\_motif\_56.m2m

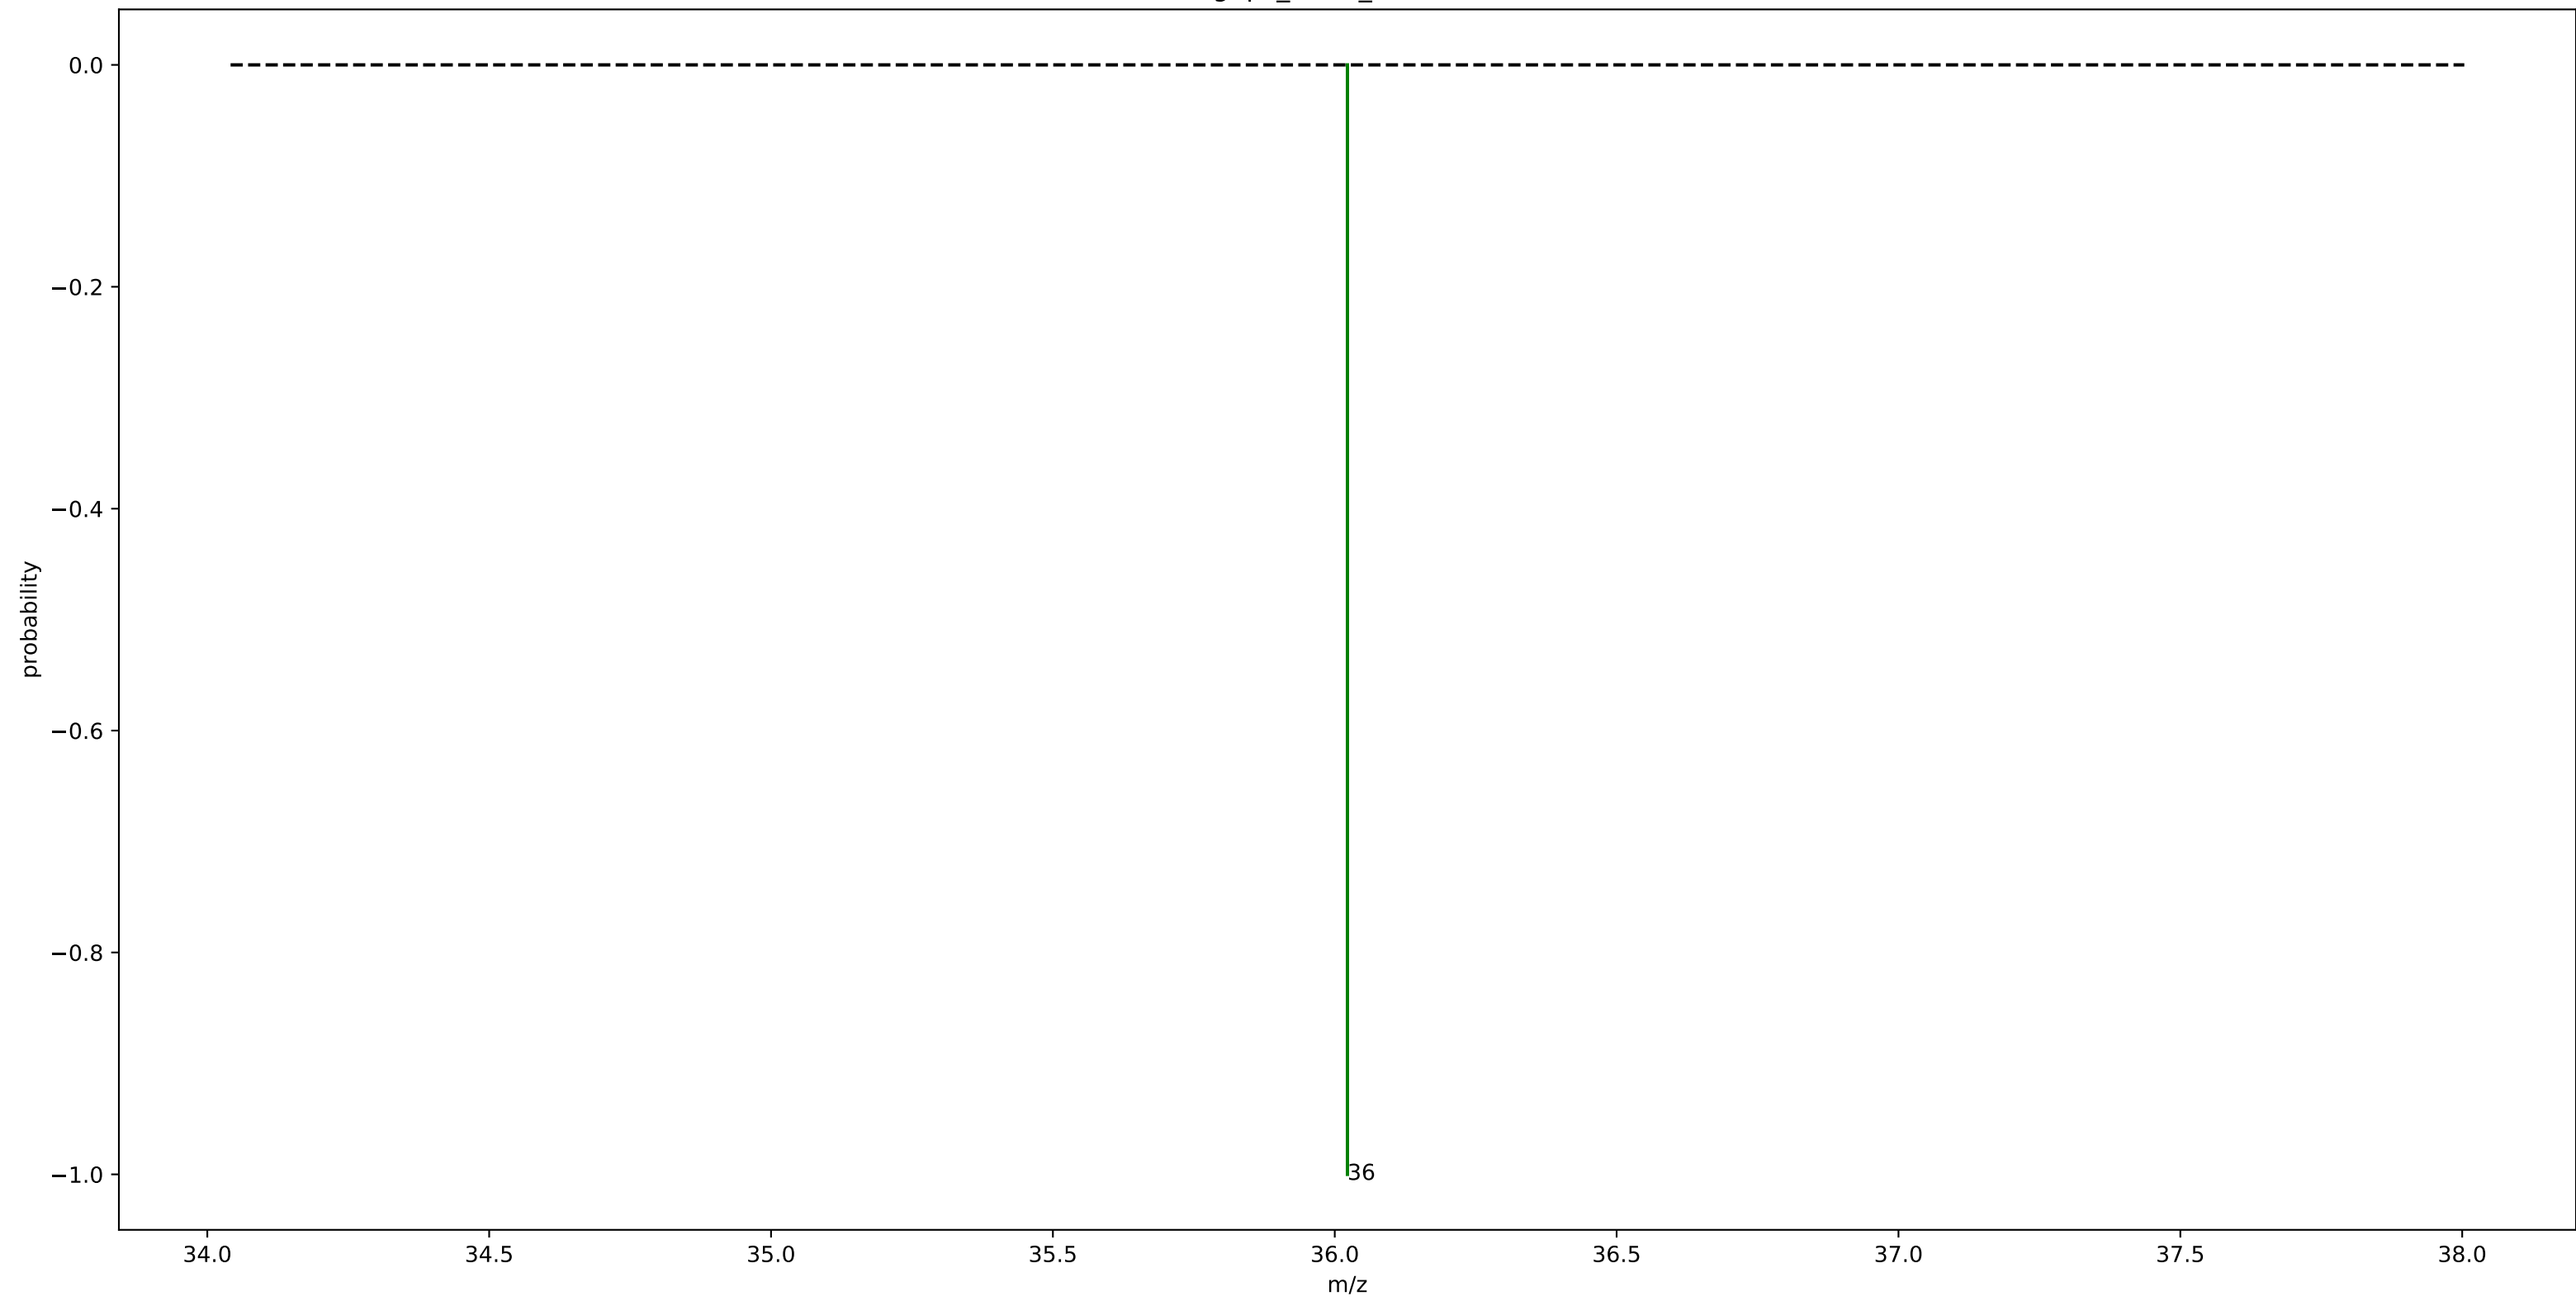

# gnps\_motif\_56.m2m

loss\_36.0225 : 1.00

urine\_mass2motif\_34.m2m

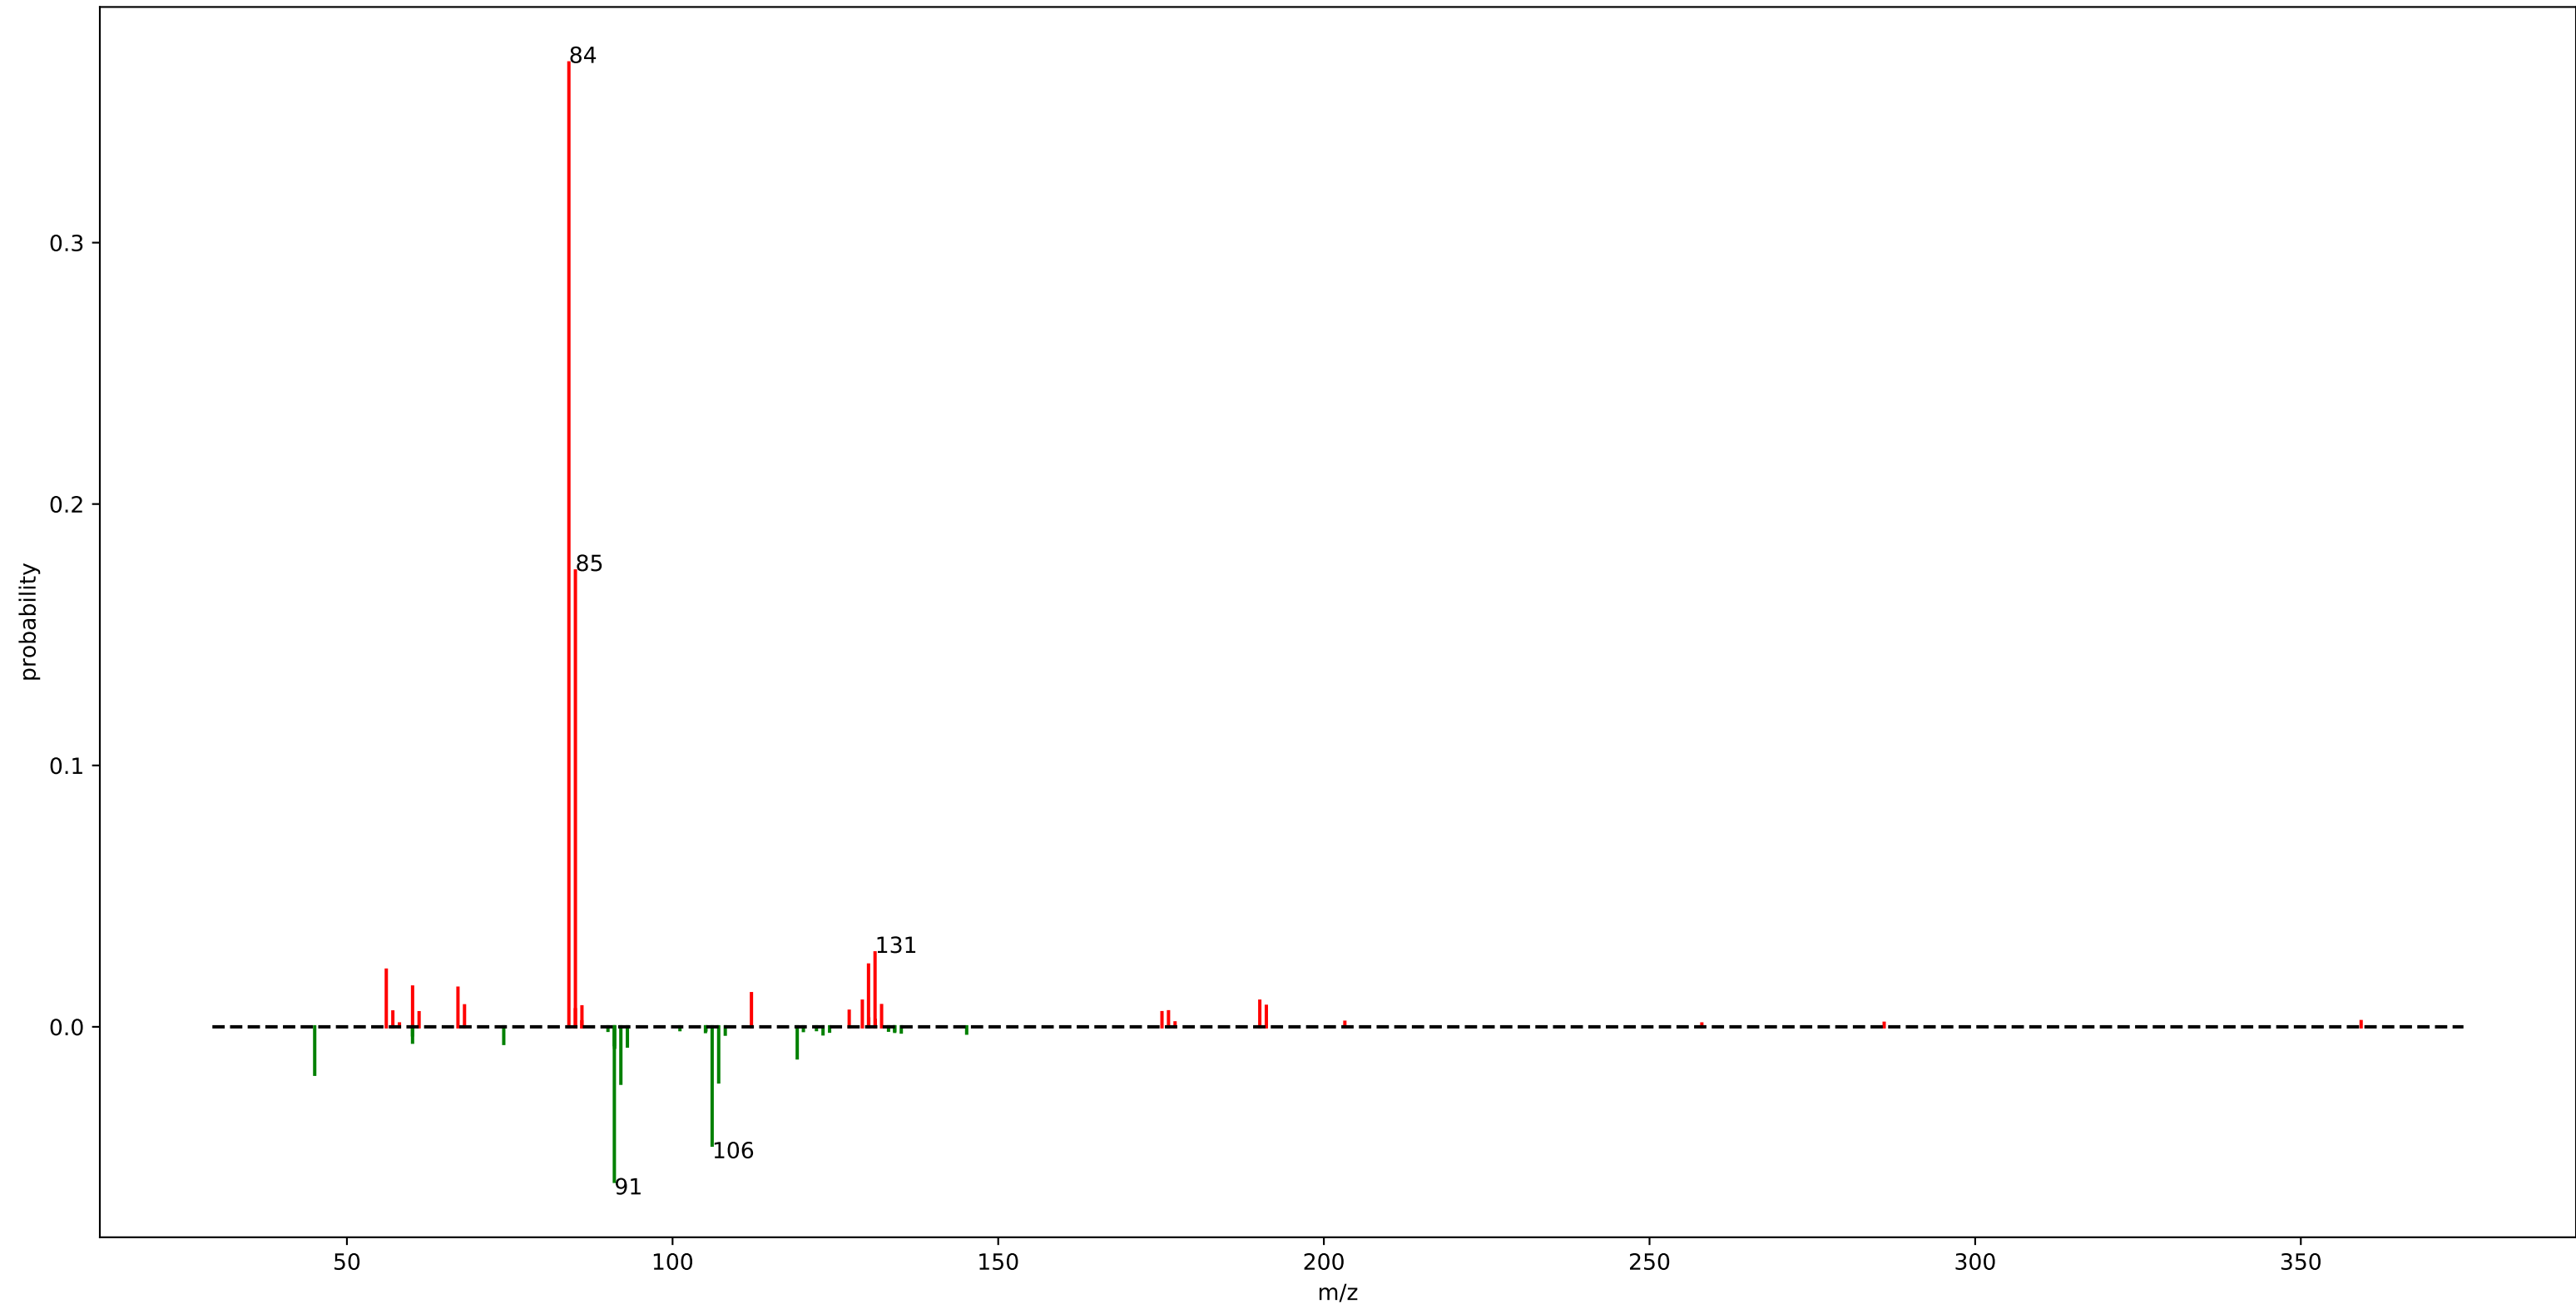

# urine\_mass2motif\_34.m2m

|                   |        |                   |        |
|-------------------|--------|-------------------|--------|
| fragment_84.0825  | : 0.37 | fragment_86.0875  | : 0.01 |
| fragment_85.0825  | : 0.17 | loss_93.0675      | : 0.01 |
| loss_91.0625      | : 0.06 | loss_91.0575      | : 0.01 |
| loss_106.0775     | : 0.05 | fragment_85.0775  | : 0.01 |
| fragment_131.0875 | : 0.03 | loss_74.0825      | : 0.01 |
| fragment_130.0875 | : 0.02 | fragment_127.1225 | : 0.01 |
| fragment_56.0475  | : 0.02 | loss_60.0775      | : 0.01 |
| loss_92.0625      | : 0.02 | fragment_176.1475 | : 0.01 |
| loss_107.0825     | : 0.02 | fragment_57.0525  | : 0.01 |
| loss_45.0575      | : 0.02 | fragment_175.1425 | : 0.01 |
| fragment_60.0825  | : 0.02 | fragment_61.0825  | : 0.01 |
| fragment_67.0525  | : 0.01 |                   |        |
| fragment_112.1125 | : 0.01 |                   |        |
| loss_119.1425     | : 0.01 |                   |        |
| fragment_129.1375 | : 0.01 |                   |        |
| fragment_190.1625 | : 0.01 |                   |        |
| fragment_132.0925 | : 0.01 |                   |        |
| fragment_68.0575  | : 0.01 |                   |        |
| fragment_191.1675 | : 0.01 |                   |        |
| loss_91.1075      | : 0.01 |                   |        |

urine\_mass2motif\_173.m2m

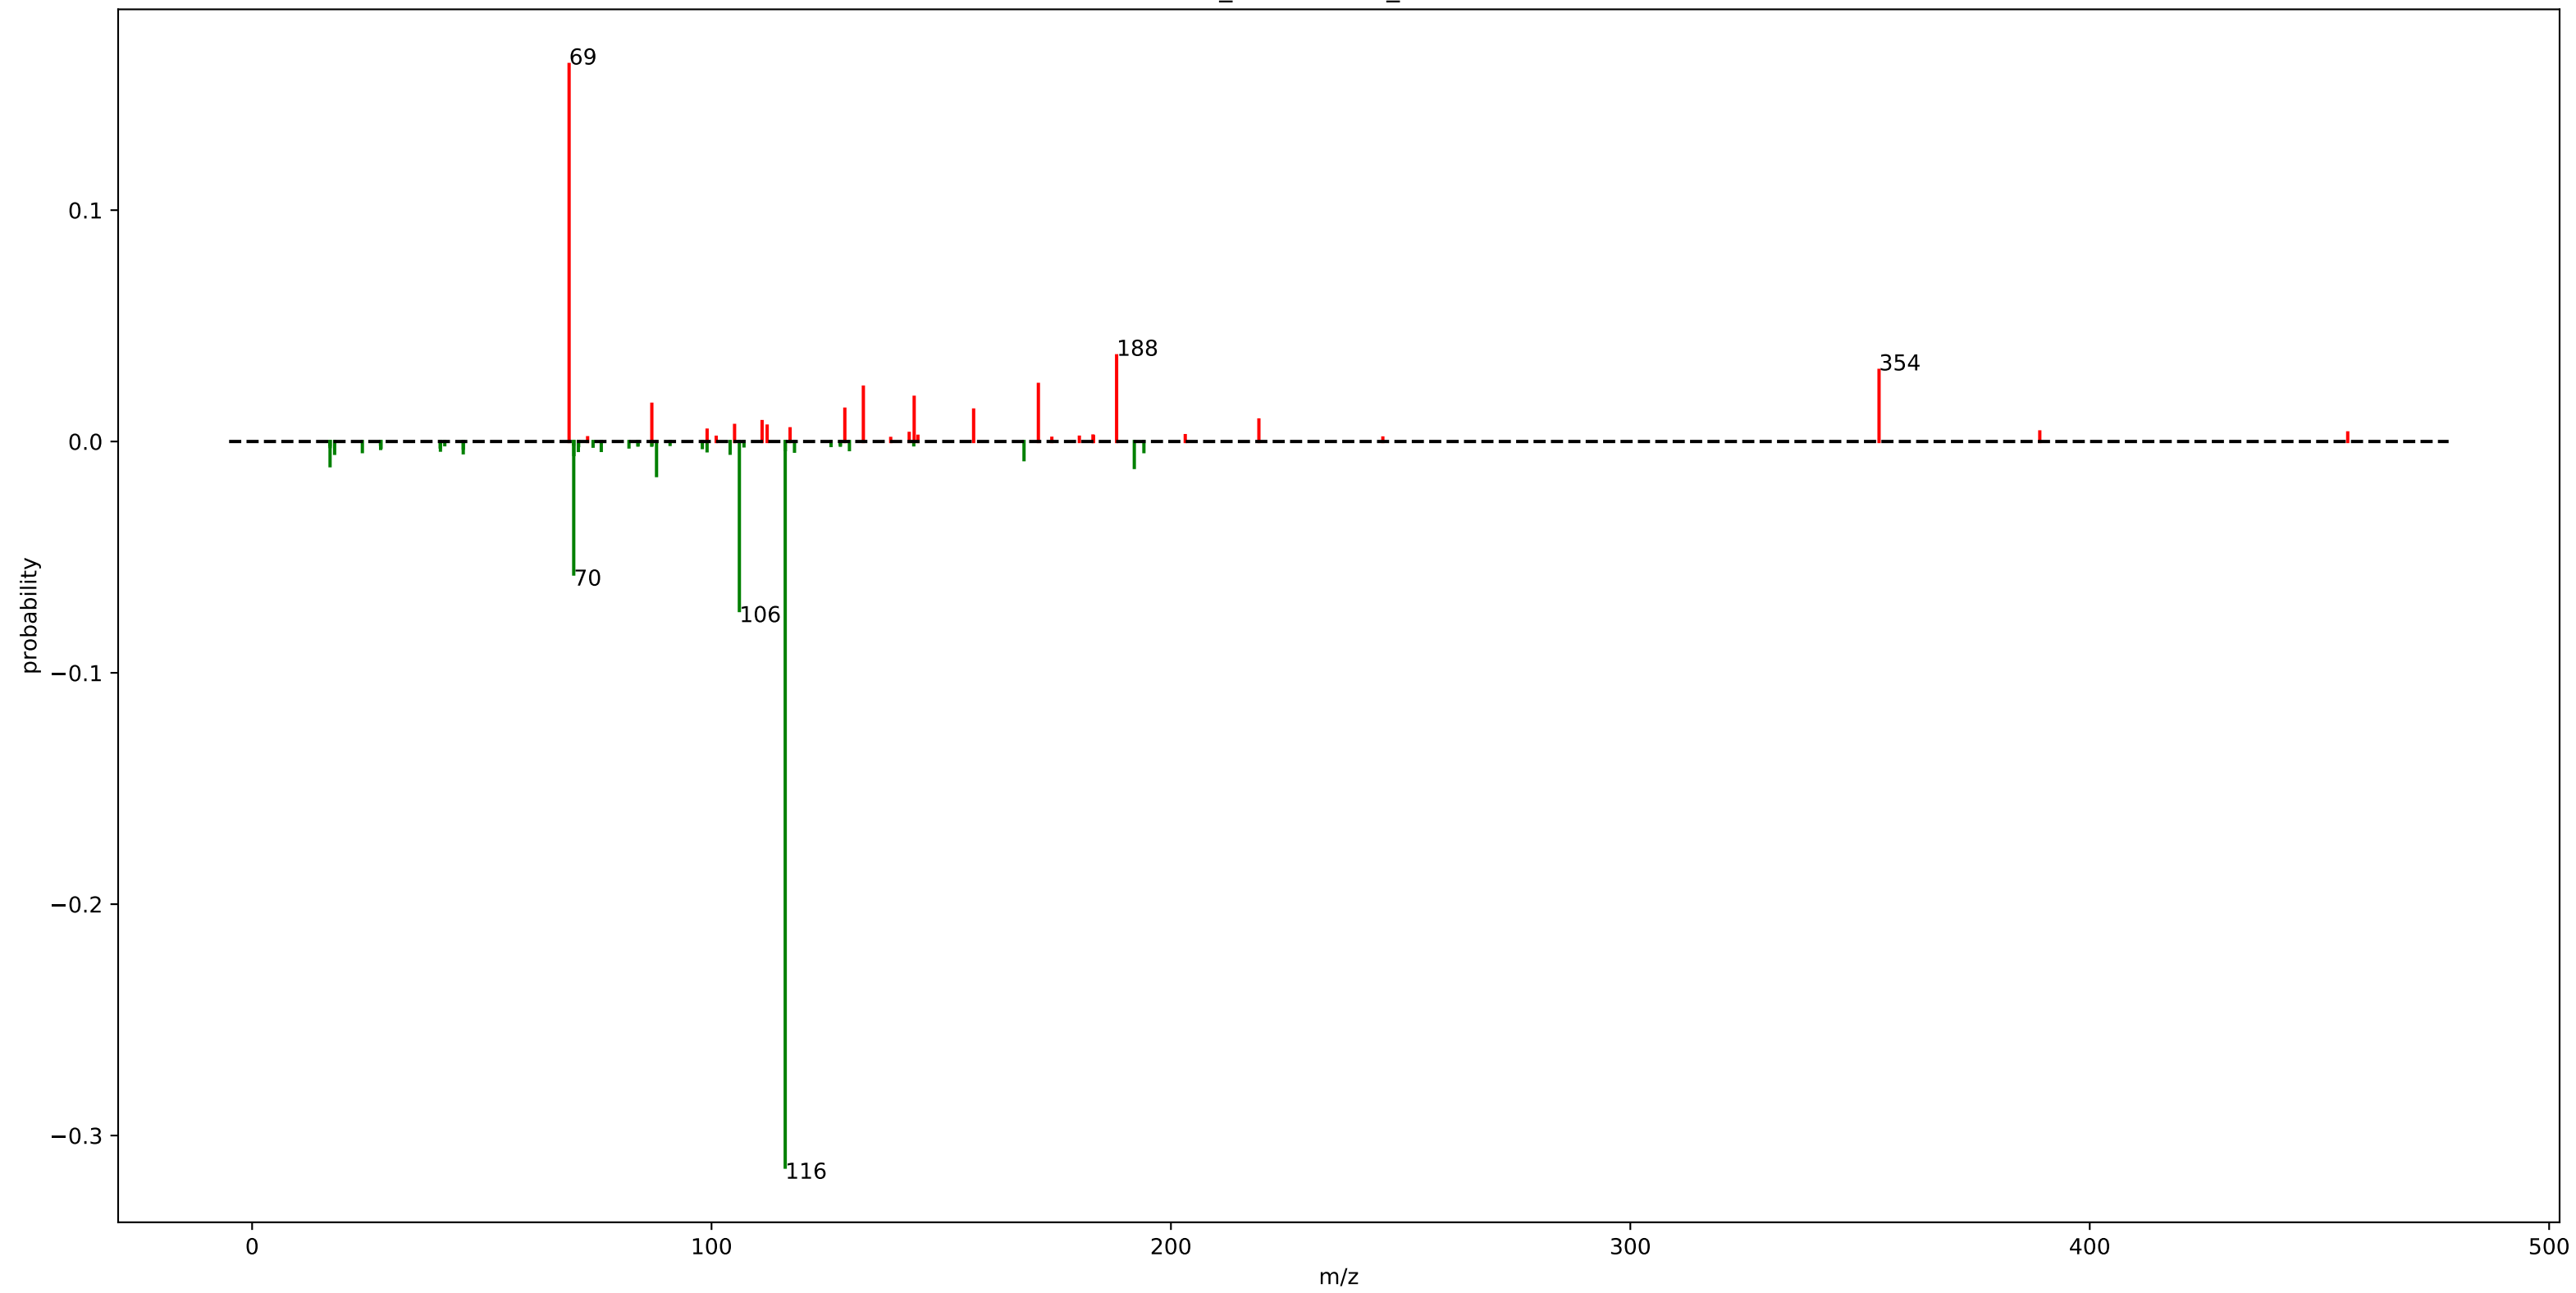

# urine\_mass2motif\_173.m2m

|                   |        |                   |        |
|-------------------|--------|-------------------|--------|
| loss_116.0425     | : 0.31 | loss_70.0475      | : 0.01 |
| fragment_68.9975  | : 0.16 | fragment_117.1025 | : 0.01 |
| loss_106.0625     | : 0.07 | loss_17.9625      | : 0.01 |
| loss_70.0075      | : 0.06 | loss_104.0525     | : 0.01 |
| fragment_188.1775 | : 0.04 |                   |        |
| fragment_354.1375 | : 0.03 |                   |        |
| fragment_171.1475 | : 0.02 |                   |        |
| fragment_133.0525 | : 0.02 |                   |        |
| fragment_144.1125 | : 0.02 |                   |        |
| fragment_87.0075  | : 0.02 |                   |        |
| loss_88.0325      | : 0.01 |                   |        |
| fragment_129.0175 | : 0.01 |                   |        |
| fragment_157.0525 | : 0.01 |                   |        |
| loss_192.0275     | : 0.01 |                   |        |
| loss_16.9675      | : 0.01 |                   |        |
| fragment_219.1475 | : 0.01 |                   |        |
| fragment_111.0075 | : 0.01 |                   |        |
| loss_168.0225     | : 0.01 |                   |        |
| fragment_105.0175 | : 0.01 |                   |        |
| fragment_112.1125 | : 0.01 |                   |        |

urine\_mass2motif\_242.m2m

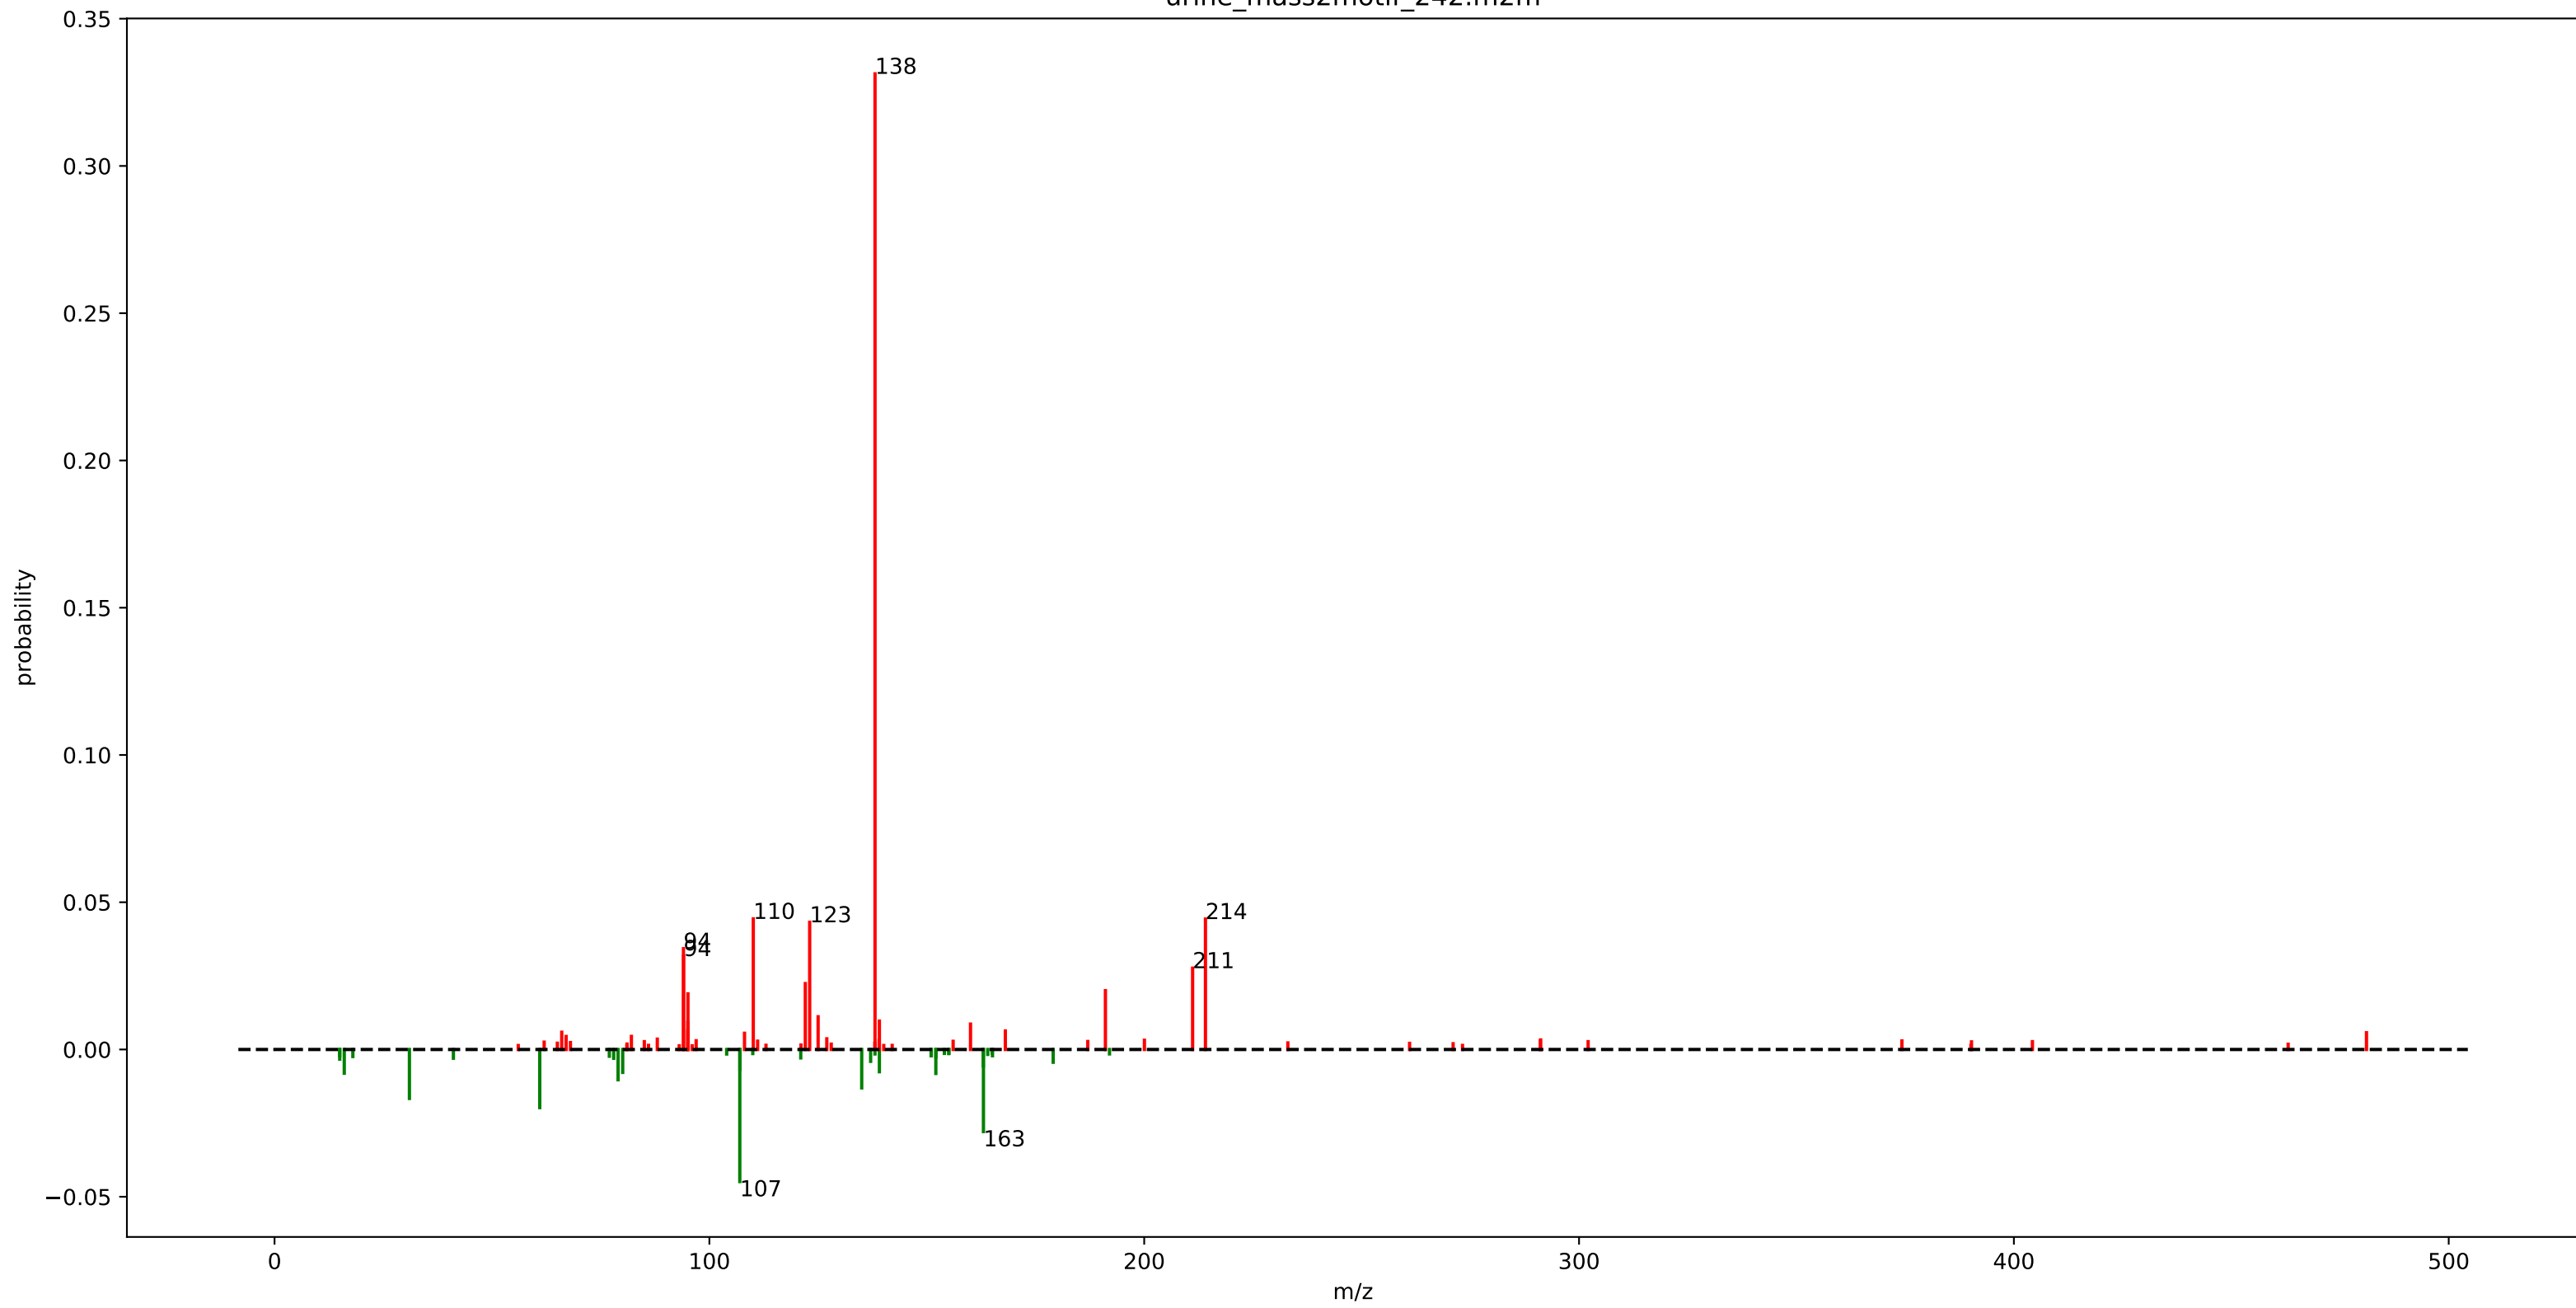

# urine\_mass2motif\_242.m2m

|                   |        |                   |        |
|-------------------|--------|-------------------|--------|
| fragment_138.0925 | : 0.33 | loss_152.0775     | : 0.01 |
| loss_106.9975     | : 0.04 | loss_16.0325      | : 0.01 |
| fragment_110.0975 | : 0.04 | loss_80.0675      | : 0.01 |
| fragment_214.0825 | : 0.04 | loss_139.0975     | : 0.01 |
| fragment_123.0675 | : 0.04 | loss_107.0225     | : 0.01 |
| fragment_94.0425  | : 0.03 | fragment_168.0625 | : 0.01 |
| fragment_94.0675  | : 0.03 | fragment_95.0425  | : 0.01 |
| loss_163.0275     | : 0.03 | fragment_66.0475  | : 0.01 |
| fragment_211.1325 | : 0.03 | fragment_481.0875 | : 0.01 |
| fragment_122.0625 | : 0.02 | loss_163.0025     | : 0.01 |
| fragment_191.0775 | : 0.02 | fragment_108.0825 | : 0.01 |
| loss_60.9925      | : 0.02 |                   |        |
| fragment_95.0725  | : 0.02 |                   |        |
| loss_31.0175      | : 0.02 |                   |        |
| loss_135.0325     | : 0.01 |                   |        |
| fragment_125.0075 | : 0.01 |                   |        |
| loss_79.0025      | : 0.01 |                   |        |
| fragment_139.0975 | : 0.01 |                   |        |
| fragment_95.0475  | : 0.01 |                   |        |
| fragment_160.0525 | : 0.01 |                   |        |



euphorbia\_motif\_375.m2m

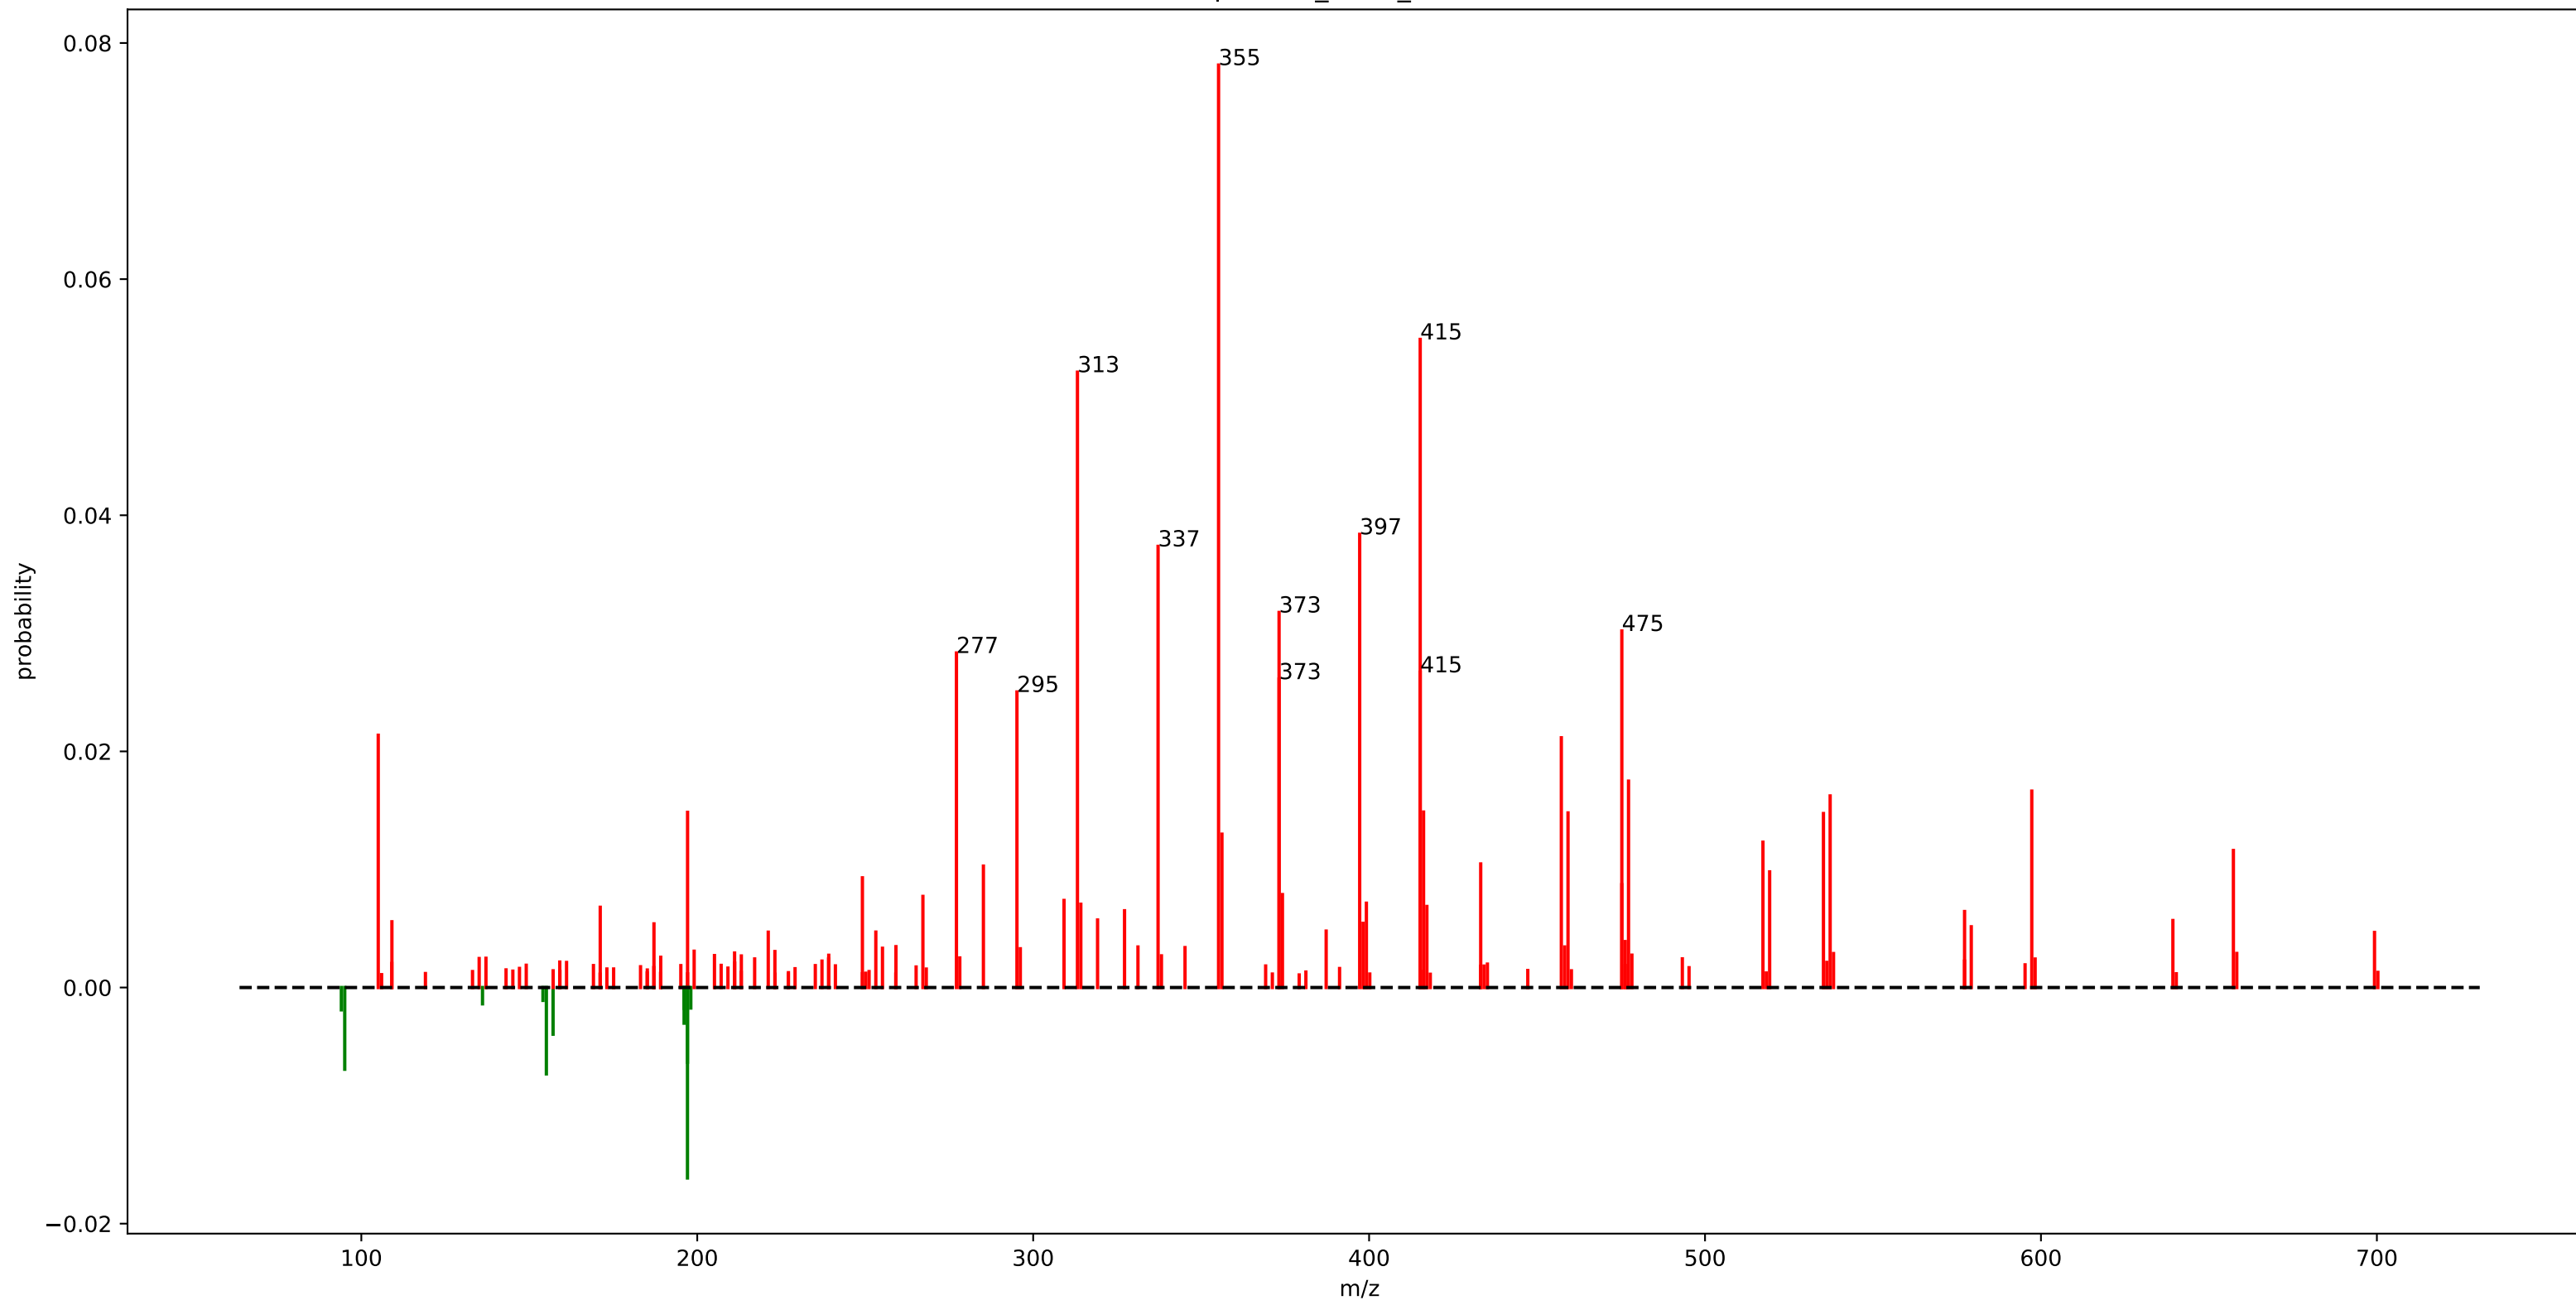

# euphorbia\_motif\_375.m2m

|                   |        |                   |        |                   |        |
|-------------------|--------|-------------------|--------|-------------------|--------|
| fragment_355.1875 | : 0.08 | fragment_535.2525 | : 0.01 | loss_197.0925     | : 0.01 |
| fragment_415.2125 | : 0.05 | fragment_356.1925 | : 0.01 | fragment_319.1675 | : 0.01 |
| fragment_313.1775 | : 0.05 | fragment_517.2425 | : 0.01 | fragment_639.2775 | : 0.01 |
| fragment_397.1975 | : 0.04 | fragment_657.2875 | : 0.01 | fragment_109.1025 | : 0.01 |
| fragment_337.1775 | : 0.04 | fragment_433.2225 | : 0.01 | fragment_398.2025 | : 0.01 |
| fragment_373.1975 | : 0.03 | fragment_285.1825 | : 0.01 | fragment_187.1125 | : 0.01 |
| fragment_475.2325 | : 0.03 | fragment_519.2375 | : 0.01 | fragment_579.2575 | : 0.01 |
| fragment_277.1575 | : 0.03 | fragment_249.1625 | : 0.01 |                   |        |
| fragment_415.2075 | : 0.03 | fragment_475.2275 | : 0.01 |                   |        |
| fragment_373.2025 | : 0.03 | fragment_374.2025 | : 0.01 |                   |        |
| fragment_295.1675 | : 0.03 | fragment_267.1725 | : 0.01 |                   |        |
| fragment_105.0325 | : 0.02 | fragment_309.1825 | : 0.01 |                   |        |
| fragment_457.2225 | : 0.02 | loss_155.0825     | : 0.01 |                   |        |
| fragment_477.2275 | : 0.02 | fragment_399.1925 | : 0.01 |                   |        |
| fragment_597.2675 | : 0.02 | fragment_314.1825 | : 0.01 |                   |        |
| fragment_537.2475 | : 0.02 | loss_95.0625      | : 0.01 |                   |        |
| loss_197.0875     | : 0.02 | fragment_417.2025 | : 0.01 |                   |        |
| fragment_416.2125 | : 0.01 | fragment_171.1175 | : 0.01 |                   |        |
| fragment_197.1175 | : 0.01 | fragment_327.1975 | : 0.01 |                   |        |
| fragment_459.2125 | : 0.01 | fragment_577.2625 | : 0.01 |                   |        |

motif\_679

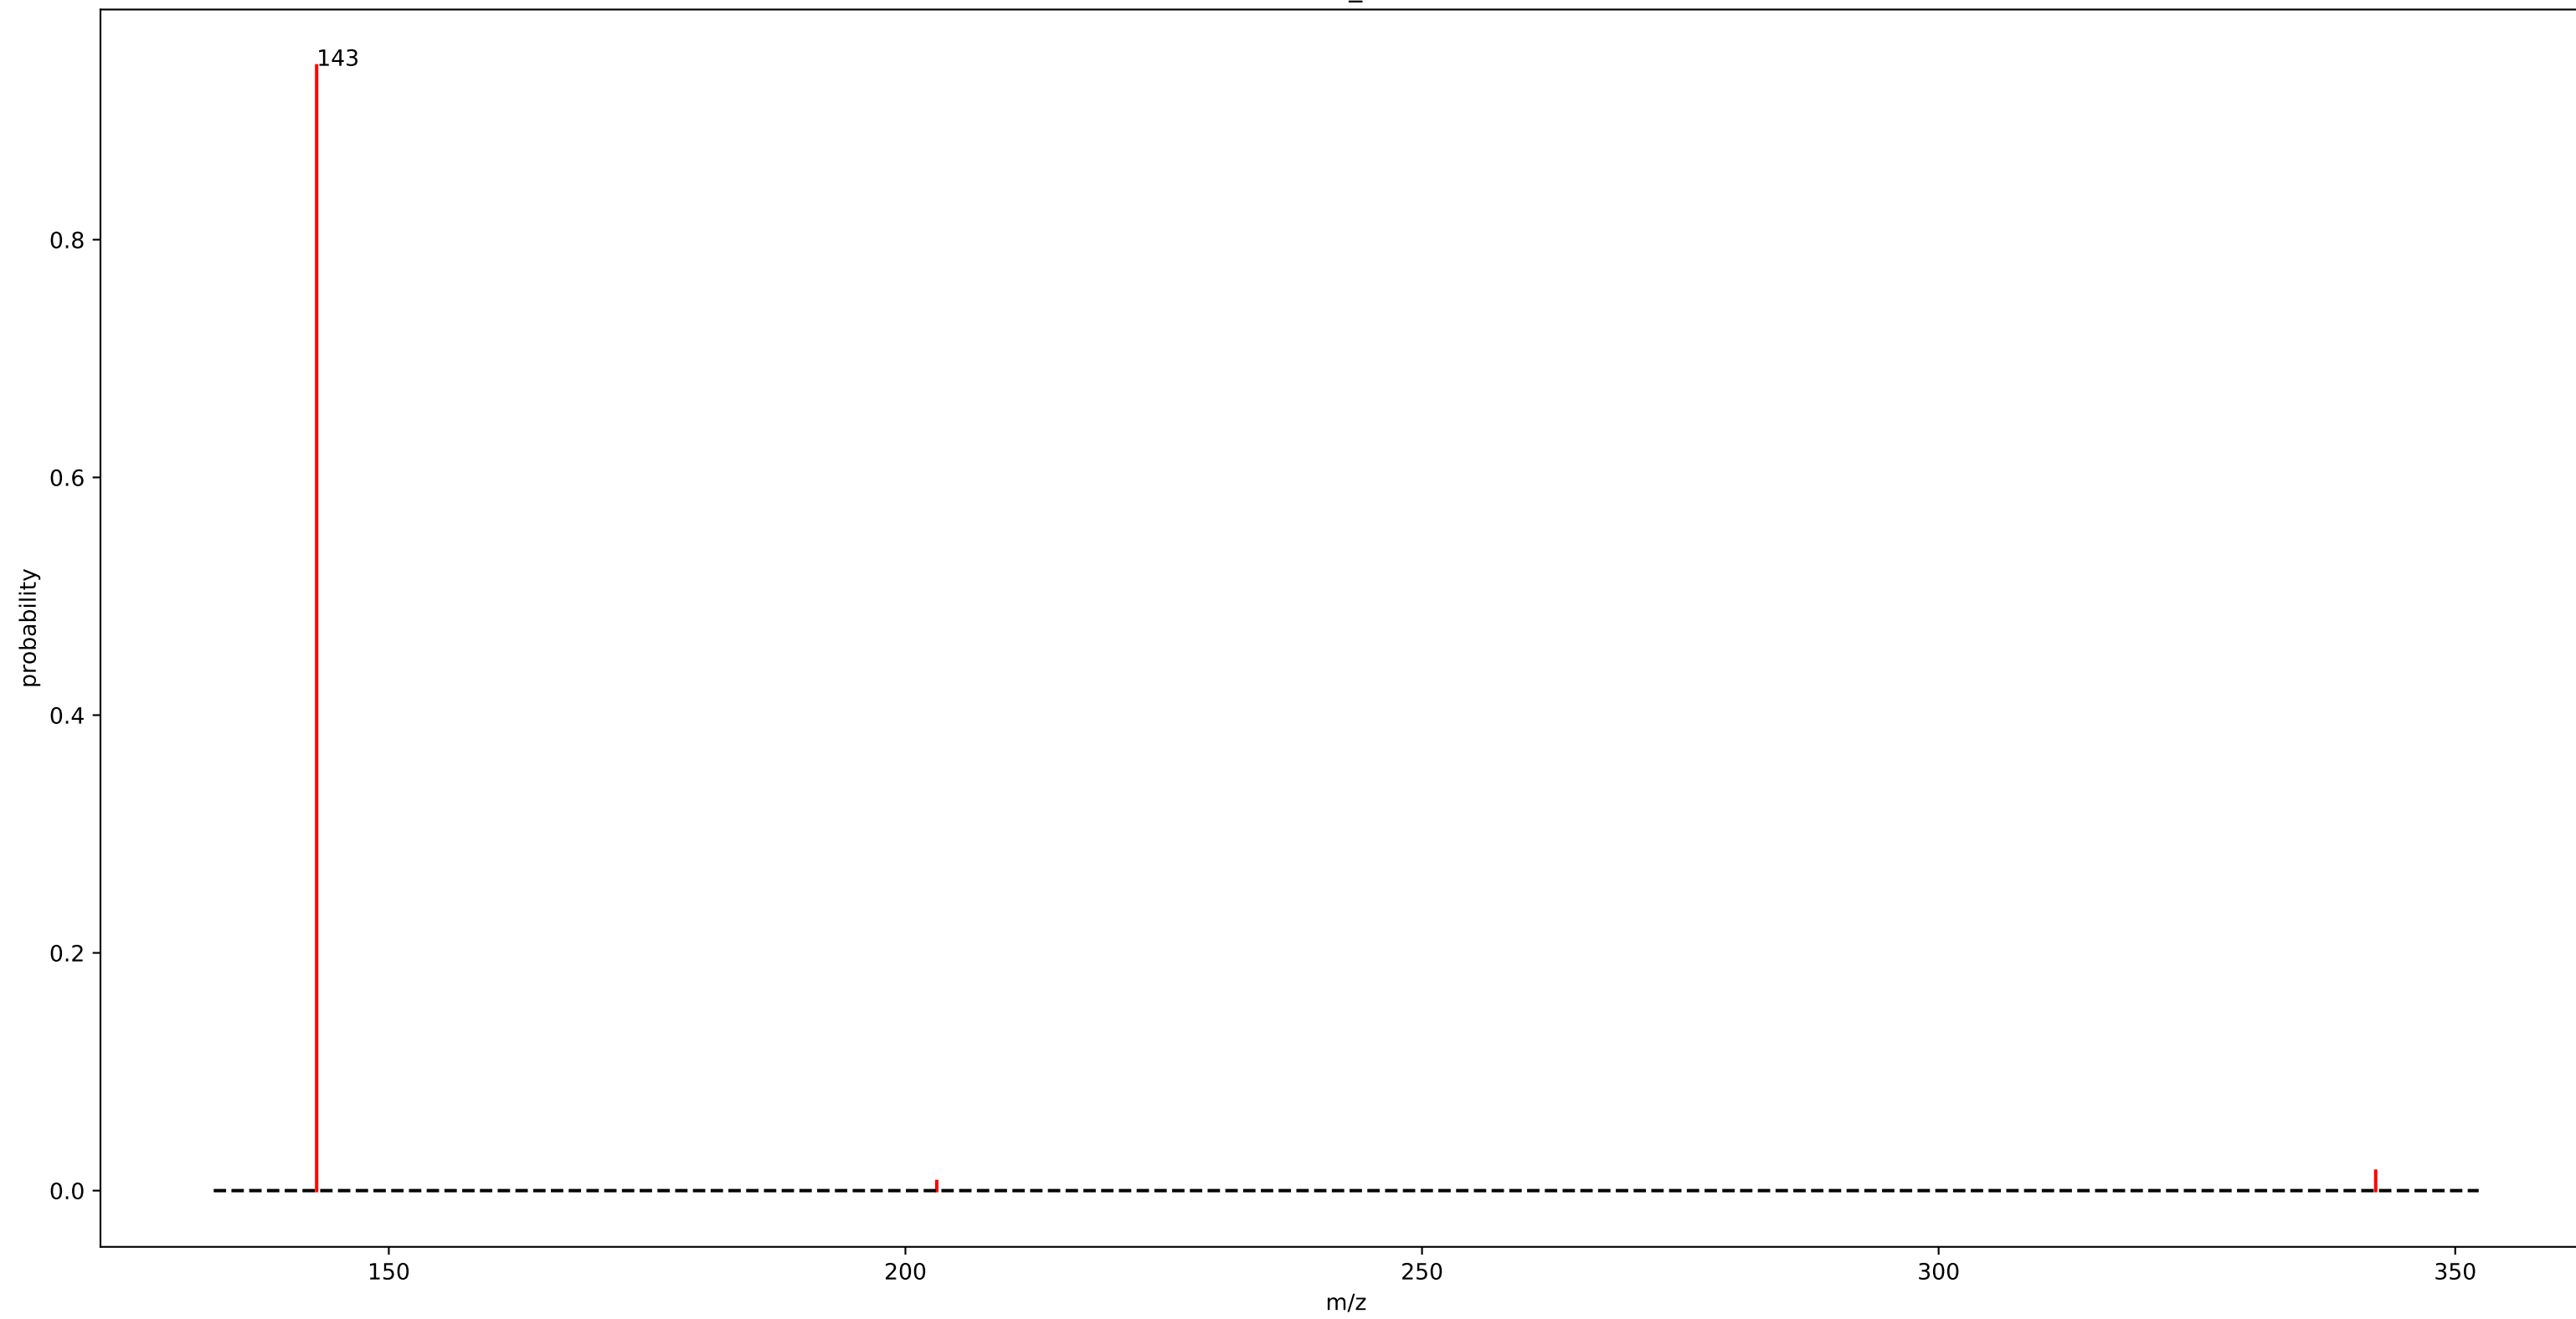

## motif\_679

|                   |        |
|-------------------|--------|
| fragment_143.0175 | : 0.95 |
| fragment_342.3025 | : 0.02 |
| fragment_203.0375 | : 0.01 |

StrepSalini\_motif\_91.m2m

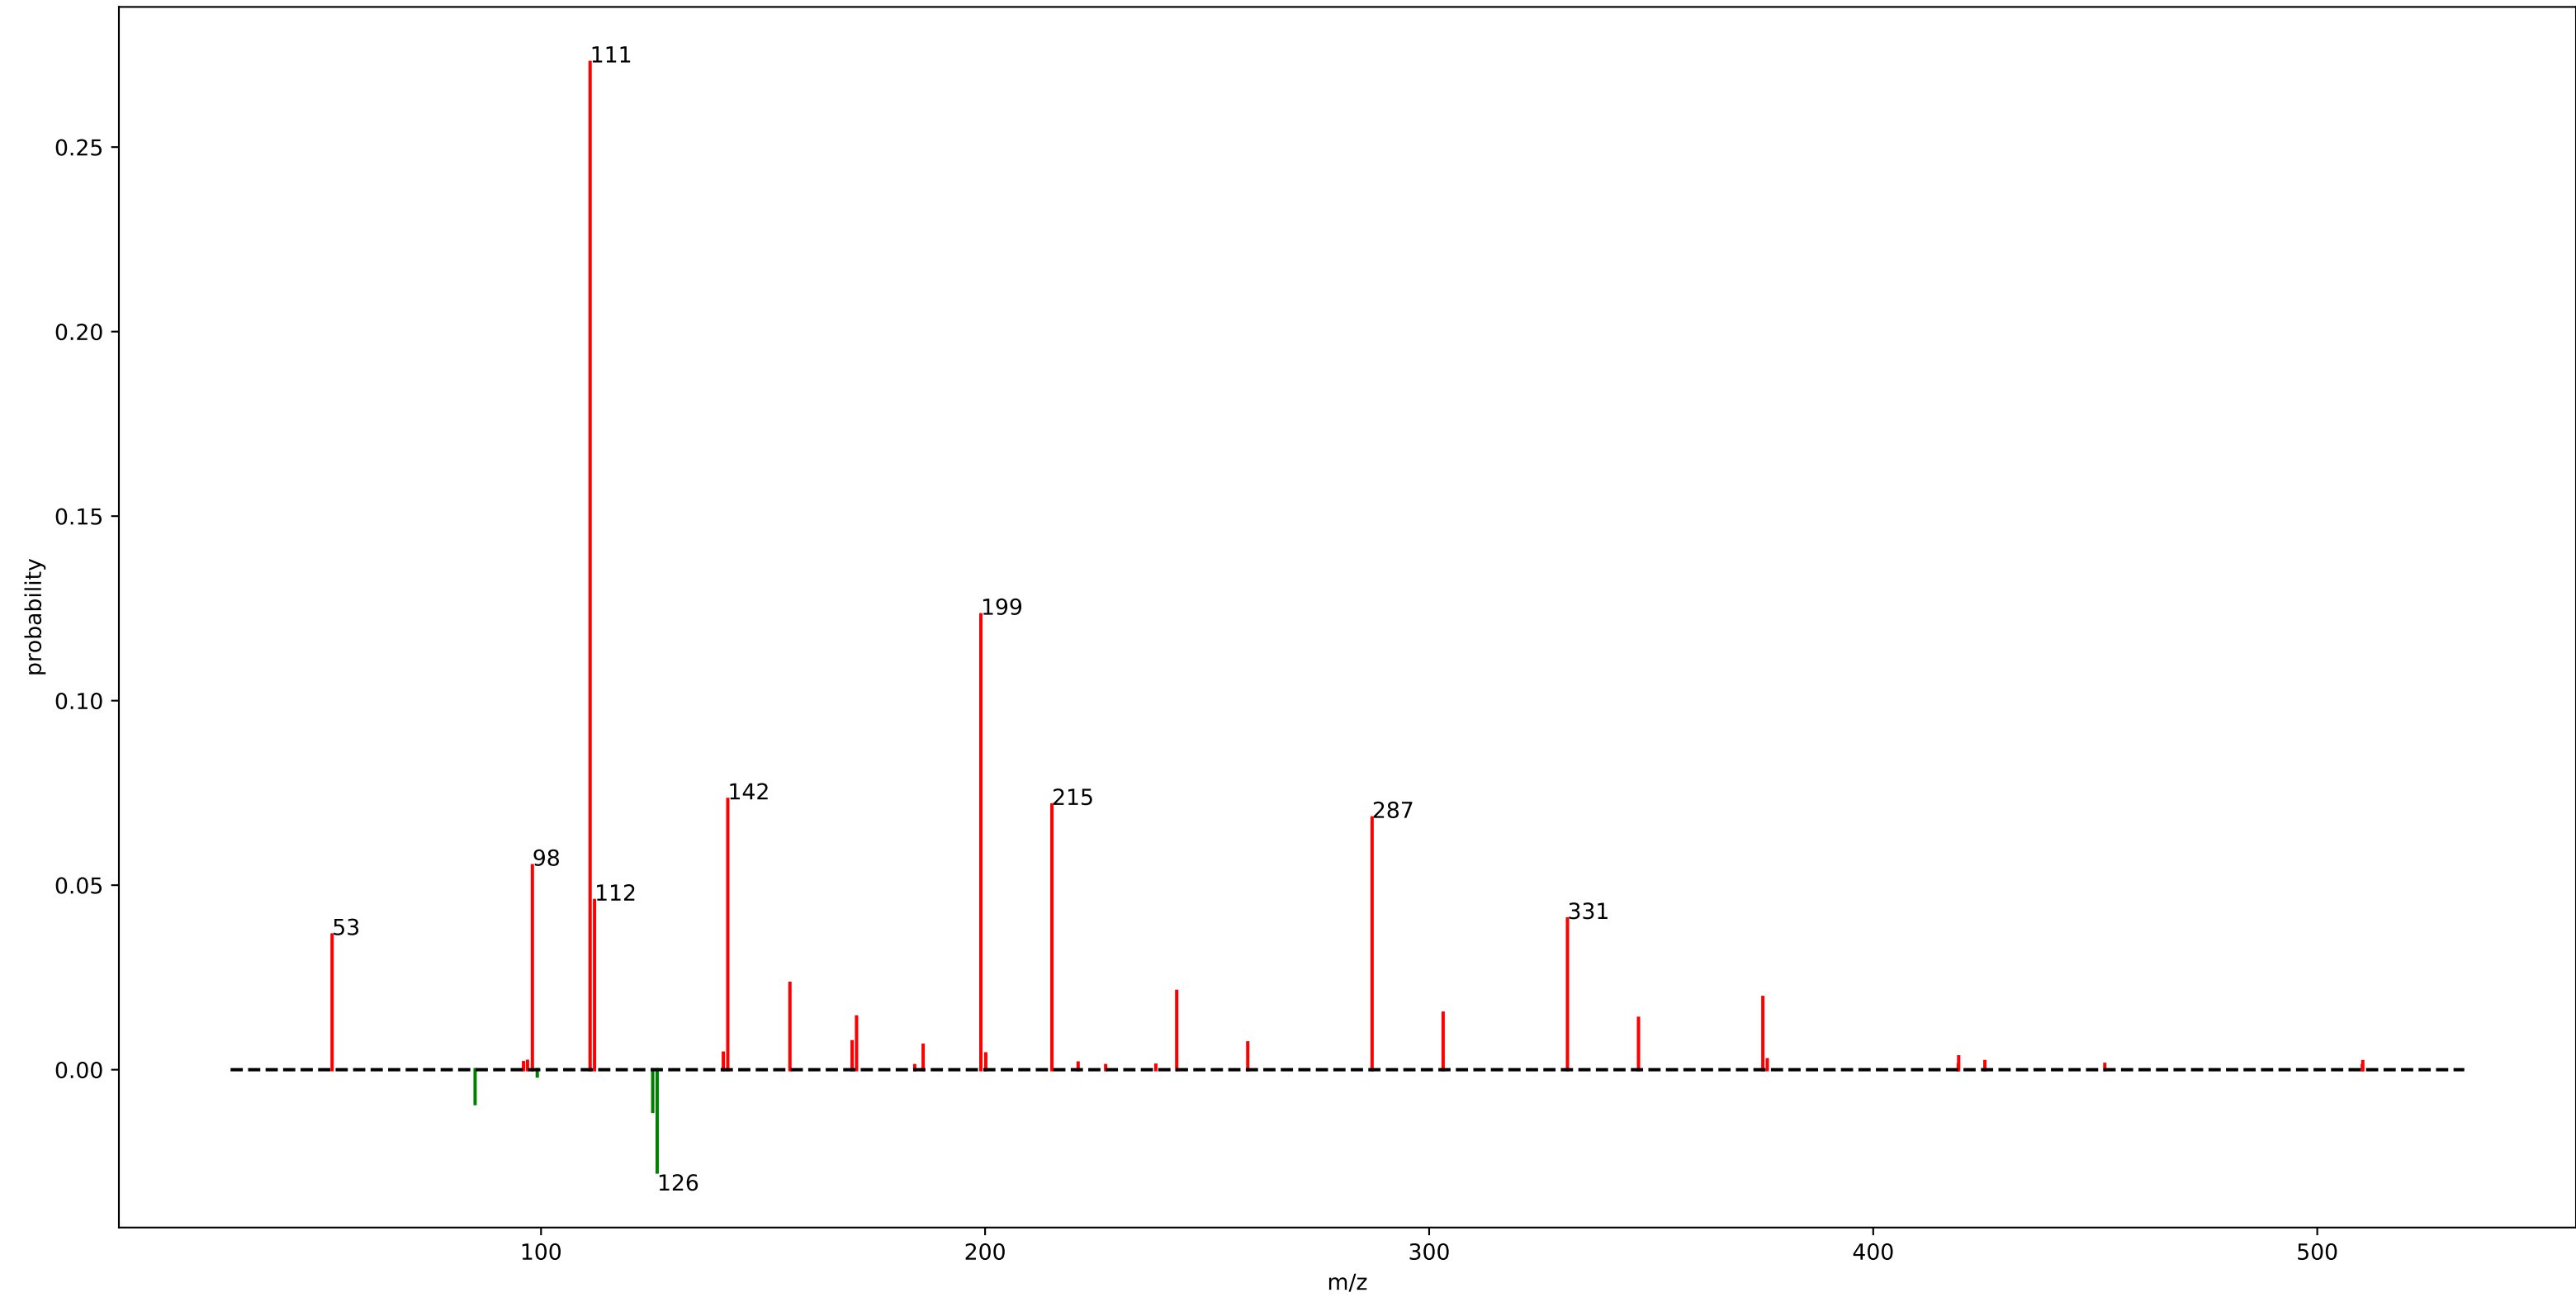

# StrepSalini\_motif\_91.m2m

|                   |        |                   |        |
|-------------------|--------|-------------------|--------|
| fragment_111.0500 | : 0.27 | fragment_186.0500 | : 0.01 |
| fragment_199.0500 | : 0.12 |                   |        |
| fragment_142.0525 | : 0.07 |                   |        |
| fragment_215.0500 | : 0.07 |                   |        |
| fragment_287.1500 | : 0.07 |                   |        |
| fragment_98.0500  | : 0.06 |                   |        |
| fragment_112.0500 | : 0.05 |                   |        |
| fragment_331.1500 | : 0.04 |                   |        |
| fragment_52.9500  | : 0.04 |                   |        |
| loss_126.1525     | : 0.03 |                   |        |
| fragment_156.0500 | : 0.02 |                   |        |
| fragment_243.1525 | : 0.02 |                   |        |
| fragment_375.1500 | : 0.02 |                   |        |
| fragment_303.1500 | : 0.02 |                   |        |
| fragment_171.0500 | : 0.01 |                   |        |
| fragment_347.1500 | : 0.01 |                   |        |
| loss_125.1525     | : 0.01 |                   |        |
| loss_85.1525      | : 0.01 |                   |        |
| fragment_170.0500 | : 0.01 |                   |        |
| fragment_259.1500 | : 0.01 |                   |        |

urine\_mass2motif\_190.m2m

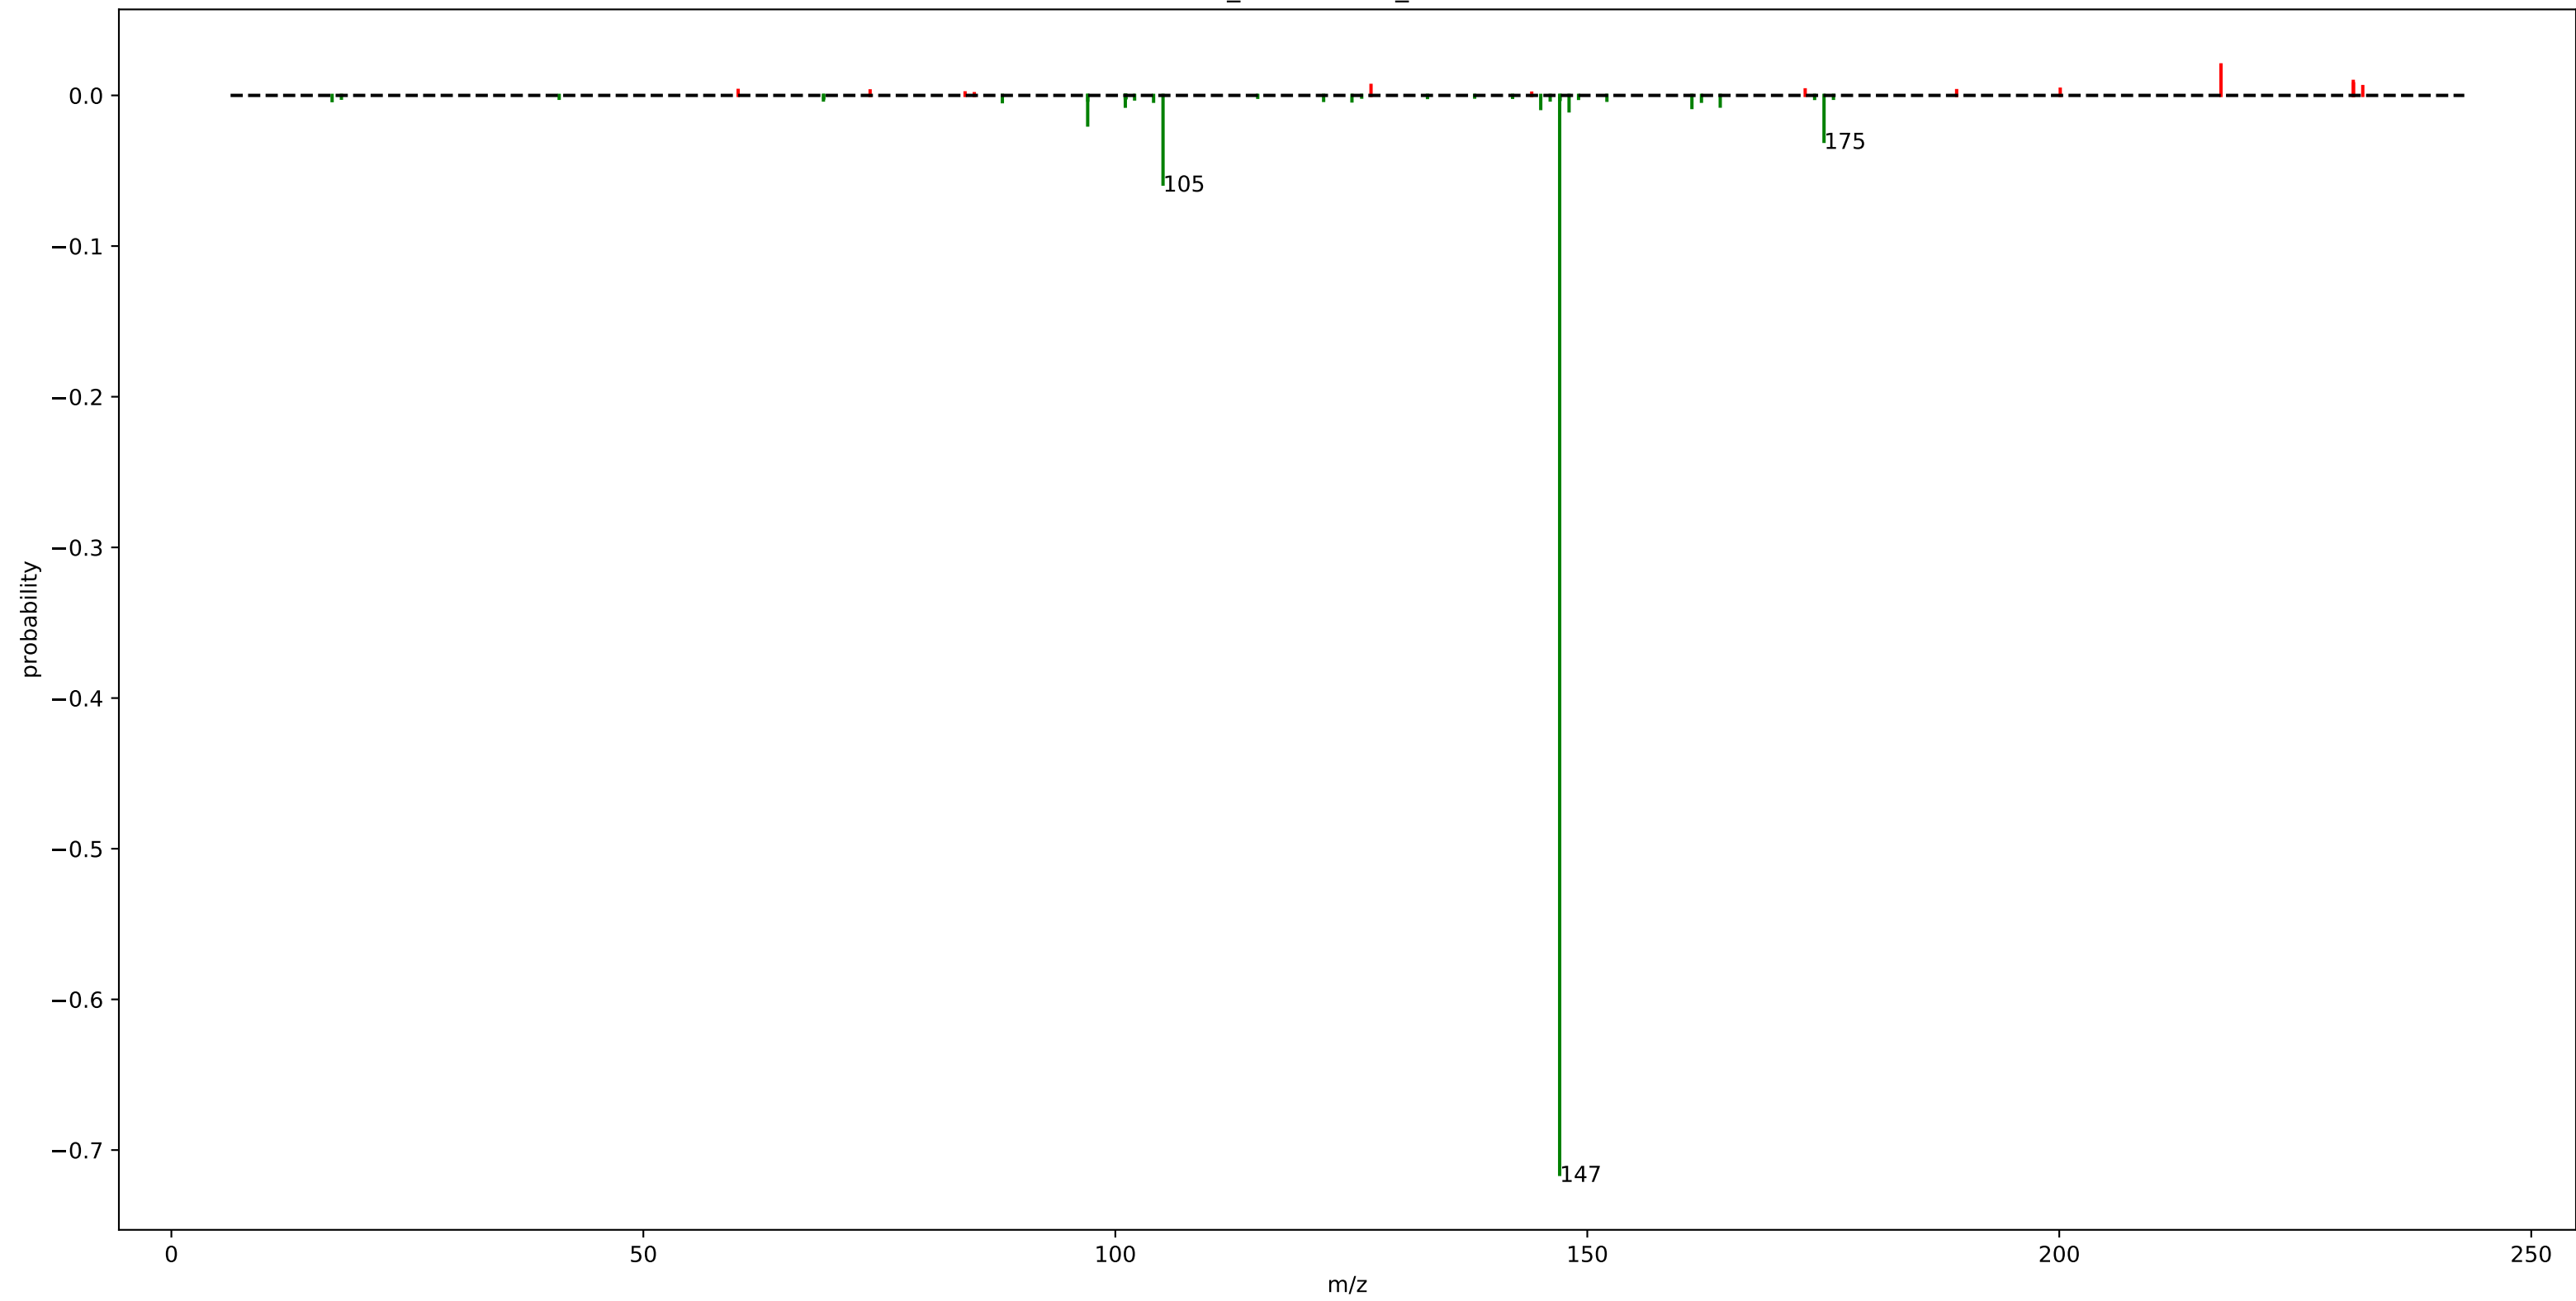

## urine\_mass2motif\_190.m2m

|                   |        |
|-------------------|--------|
| loss_147.0725     | : 0.72 |
| loss_105.0525     | : 0.06 |
| loss_175.0775     | : 0.03 |
| fragment_217.1325 | : 0.02 |
| loss_97.0725      | : 0.02 |
| loss_148.0675     | : 0.01 |
| fragment_231.1475 | : 0.01 |
| loss_145.0675     | : 0.01 |
| loss_161.0825     | : 0.01 |
| fragment_231.1725 | : 0.01 |
| loss_101.0575     | : 0.01 |
| loss_164.0825     | : 0.01 |
| fragment_127.0875 | : 0.01 |
| fragment_232.1525 | : 0.01 |



euphorbia\_motif\_2.m2m

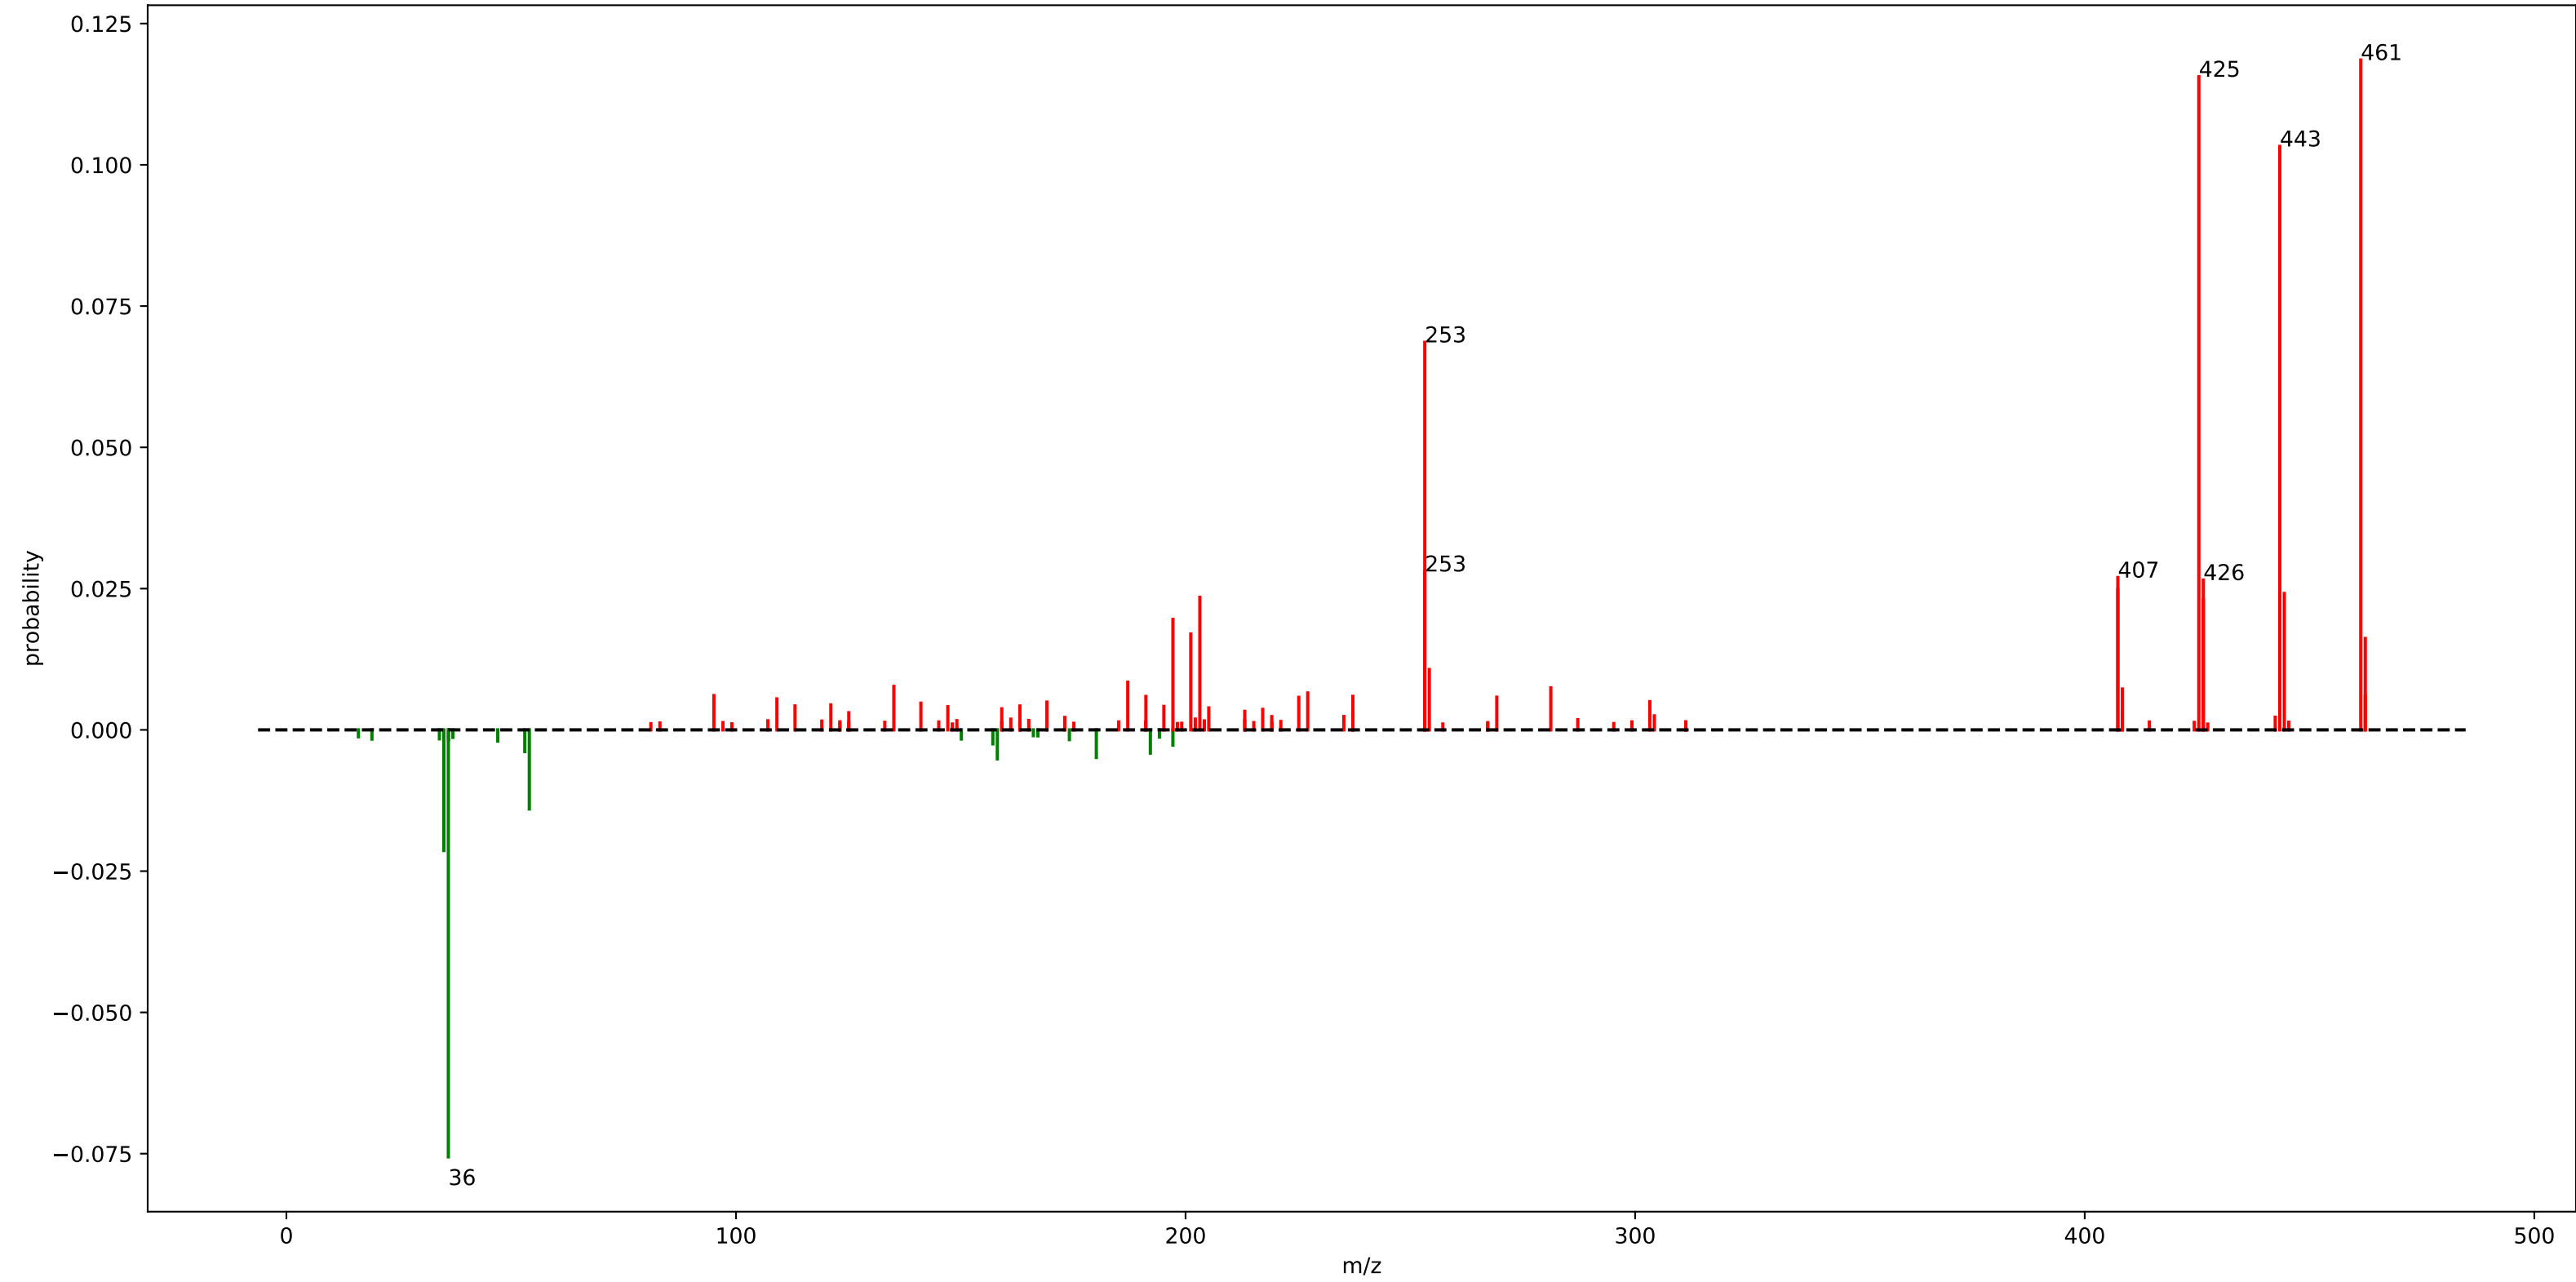

# euphorbia\_motif\_2.m2m

|                   |        |                   |        |
|-------------------|--------|-------------------|--------|
| fragment_461.3975 | : 0.12 | fragment_281.2425 | : 0.01 |
| fragment_425.3825 | : 0.12 | fragment_408.3725 | : 0.01 |
| fragment_443.3875 | : 0.10 | fragment_227.1775 | : 0.01 |
| loss_36.0225      | : 0.08 | fragment_95.0875  | : 0.01 |
| fragment_253.2125 | : 0.07 | fragment_237.2175 | : 0.01 |
| fragment_253.2175 | : 0.03 | fragment_191.1775 | : 0.01 |
| fragment_407.3675 | : 0.03 | fragment_462.3975 | : 0.01 |
| fragment_426.3825 | : 0.03 | fragment_269.2275 | : 0.01 |
| fragment_407.3625 | : 0.02 | fragment_225.1825 | : 0.01 |
| fragment_444.3875 | : 0.02 | fragment_109.1025 | : 0.01 |
| fragment_203.1775 | : 0.02 | loss_158.1325     | : 0.01 |
| fragment_426.3775 | : 0.02 |                   |        |
| loss_35.0175      | : 0.02 |                   |        |
| fragment_197.1875 | : 0.02 |                   |        |
| fragment_201.1625 | : 0.02 |                   |        |
| fragment_462.4025 | : 0.02 |                   |        |
| loss_54.0325      | : 0.01 |                   |        |
| fragment_254.2175 | : 0.01 |                   |        |
| fragment_187.1475 | : 0.01 |                   |        |
| fragment_135.1175 | : 0.01 |                   |        |



# urine\_mass2motif\_281.m2m

|                   |        |                   |        |                   |        |
|-------------------|--------|-------------------|--------|-------------------|--------|
| fragment_176.1275 | : 0.12 | fragment_57.0325  | : 0.01 | fragment_111.0275 | : 0.01 |
| fragment_296.1725 | : 0.07 | fragment_267.1225 | : 0.01 | loss_136.0025     | : 0.01 |
| fragment_130.1225 | : 0.05 | fragment_53.0375  | : 0.01 | fragment_110.0225 | : 0.01 |
| loss_110.0225     | : 0.05 | fragment_141.0125 | : 0.01 | fragment_258.0625 | : 0.01 |
| fragment_125.0175 | : 0.04 | loss_128.0325     | : 0.01 | fragment_174.0375 | : 0.01 |
| fragment_183.1025 | : 0.03 | fragment_112.0225 | : 0.01 |                   |        |
| fragment_117.0575 | : 0.03 | fragment_212.0575 | : 0.01 |                   |        |
| loss_108.0075     | : 0.03 | fragment_152.0275 | : 0.01 |                   |        |
| fragment_186.0225 | : 0.02 | loss_191.0425     | : 0.01 |                   |        |
| fragment_326.1975 | : 0.02 | fragment_113.0175 | : 0.01 |                   |        |
| fragment_140.0275 | : 0.02 | fragment_198.0325 | : 0.01 |                   |        |
| fragment_60.0825  | : 0.02 | fragment_194.0425 | : 0.01 |                   |        |
| loss_138.0125     | : 0.02 | fragment_262.0475 | : 0.01 |                   |        |
| fragment_82.0275  | : 0.02 | fragment_240.0525 | : 0.01 |                   |        |
| fragment_326.3775 | : 0.02 | fragment_128.0325 | : 0.01 |                   |        |
| fragment_155.0275 | : 0.01 | fragment_169.0025 | : 0.01 |                   |        |
| loss_64.0175      | : 0.01 | fragment_165.0925 | : 0.01 |                   |        |
| loss_91.0975      | : 0.01 | fragment_204.0325 | : 0.01 |                   |        |
| loss_82.0325      | : 0.01 | fragment_426.2425 | : 0.01 |                   |        |
| fragment_58.9975  | : 0.01 | loss_115.9725     | : 0.01 |                   |        |

urine\_mass2motif\_203.m2m

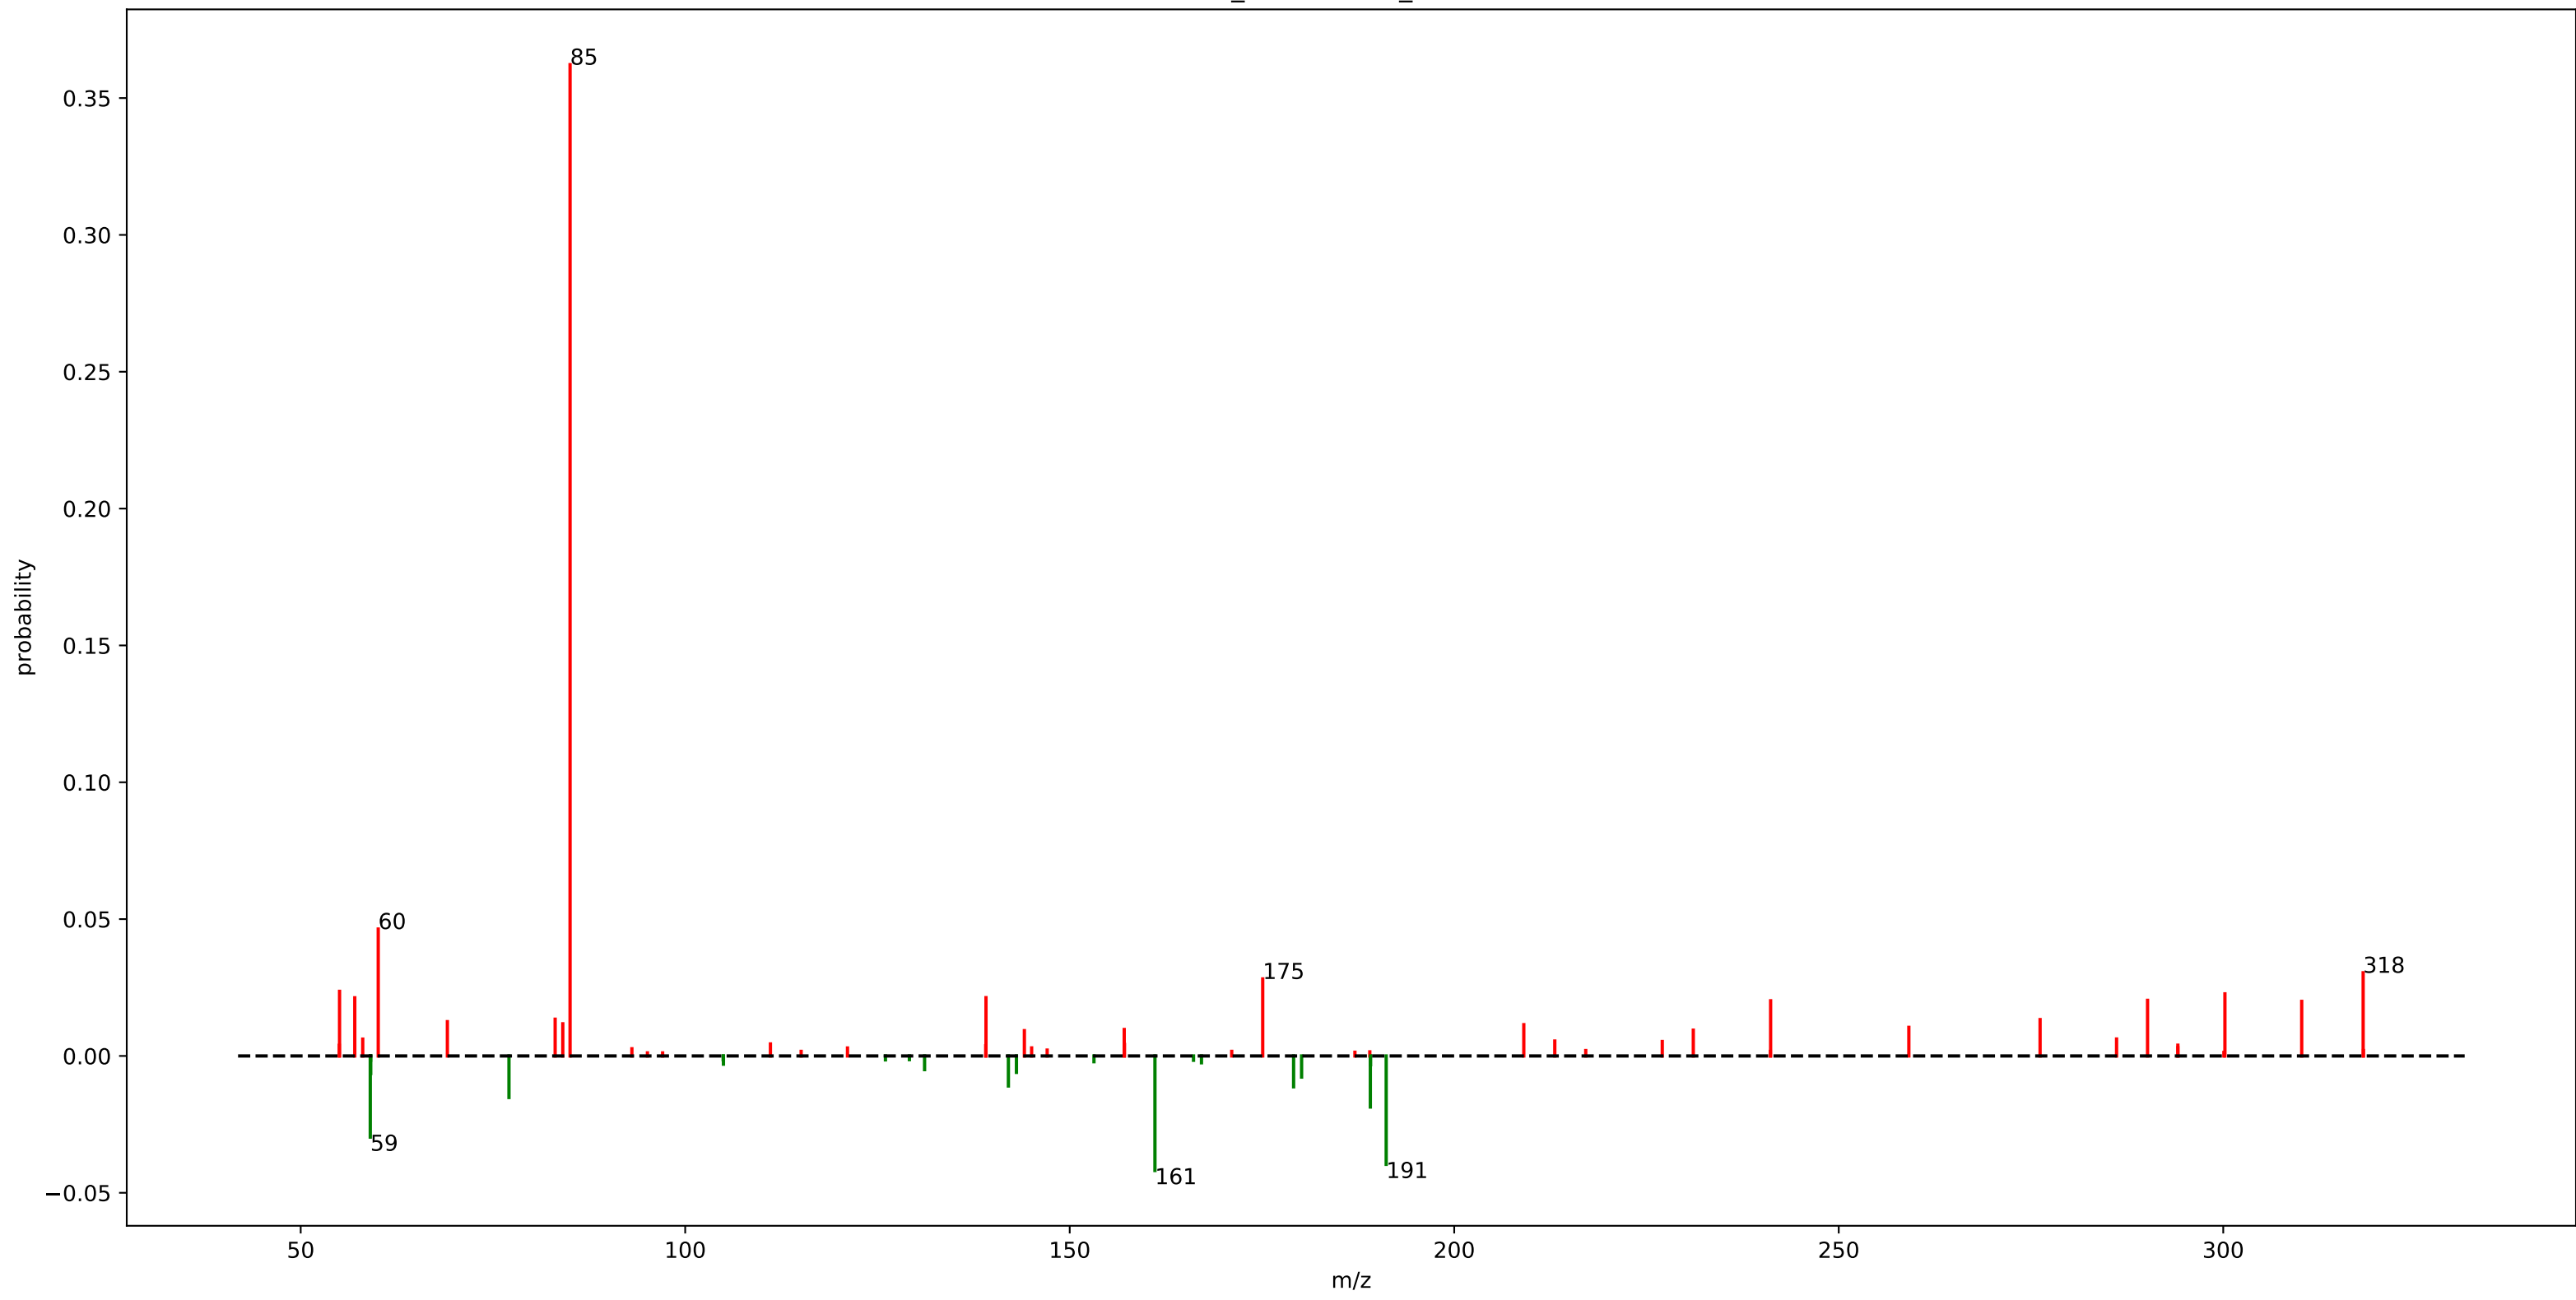

# urine\_mass2motif\_203.m2m

|                   |        |                   |        |
|-------------------|--------|-------------------|--------|
| fragment_85.0275  | : 0.36 | fragment_209.0475 | : 0.01 |
| fragment_60.0825  | : 0.05 | loss_179.1125     | : 0.01 |
| loss_161.0825     | : 0.04 | loss_142.0275     | : 0.01 |
| loss_191.1525     | : 0.04 | fragment_259.1175 | : 0.01 |
| fragment_318.1925 | : 0.03 | fragment_157.0875 | : 0.01 |
| loss_59.0475      | : 0.03 | fragment_231.0875 | : 0.01 |
| fragment_175.0975 | : 0.03 | fragment_144.1025 | : 0.01 |
| fragment_55.0525  | : 0.02 | loss_180.1525     | : 0.01 |
| fragment_300.2175 | : 0.02 | loss_59.1075      | : 0.01 |
| fragment_139.1125 | : 0.02 | fragment_286.1275 | : 0.01 |
| fragment_57.0325  | : 0.02 | fragment_58.0675  | : 0.01 |
| fragment_290.1575 | : 0.02 | loss_143.0725     | : 0.01 |
| fragment_241.1425 | : 0.02 | fragment_213.0775 | : 0.01 |
| fragment_310.2025 | : 0.02 | fragment_227.0525 | : 0.01 |
| loss_189.0925     | : 0.02 |                   |        |
| loss_77.0825      | : 0.02 |                   |        |
| fragment_83.0875  | : 0.01 |                   |        |
| fragment_276.1825 | : 0.01 |                   |        |
| fragment_69.0725  | : 0.01 |                   |        |
| fragment_84.0825  | : 0.01 |                   |        |

motif\_548

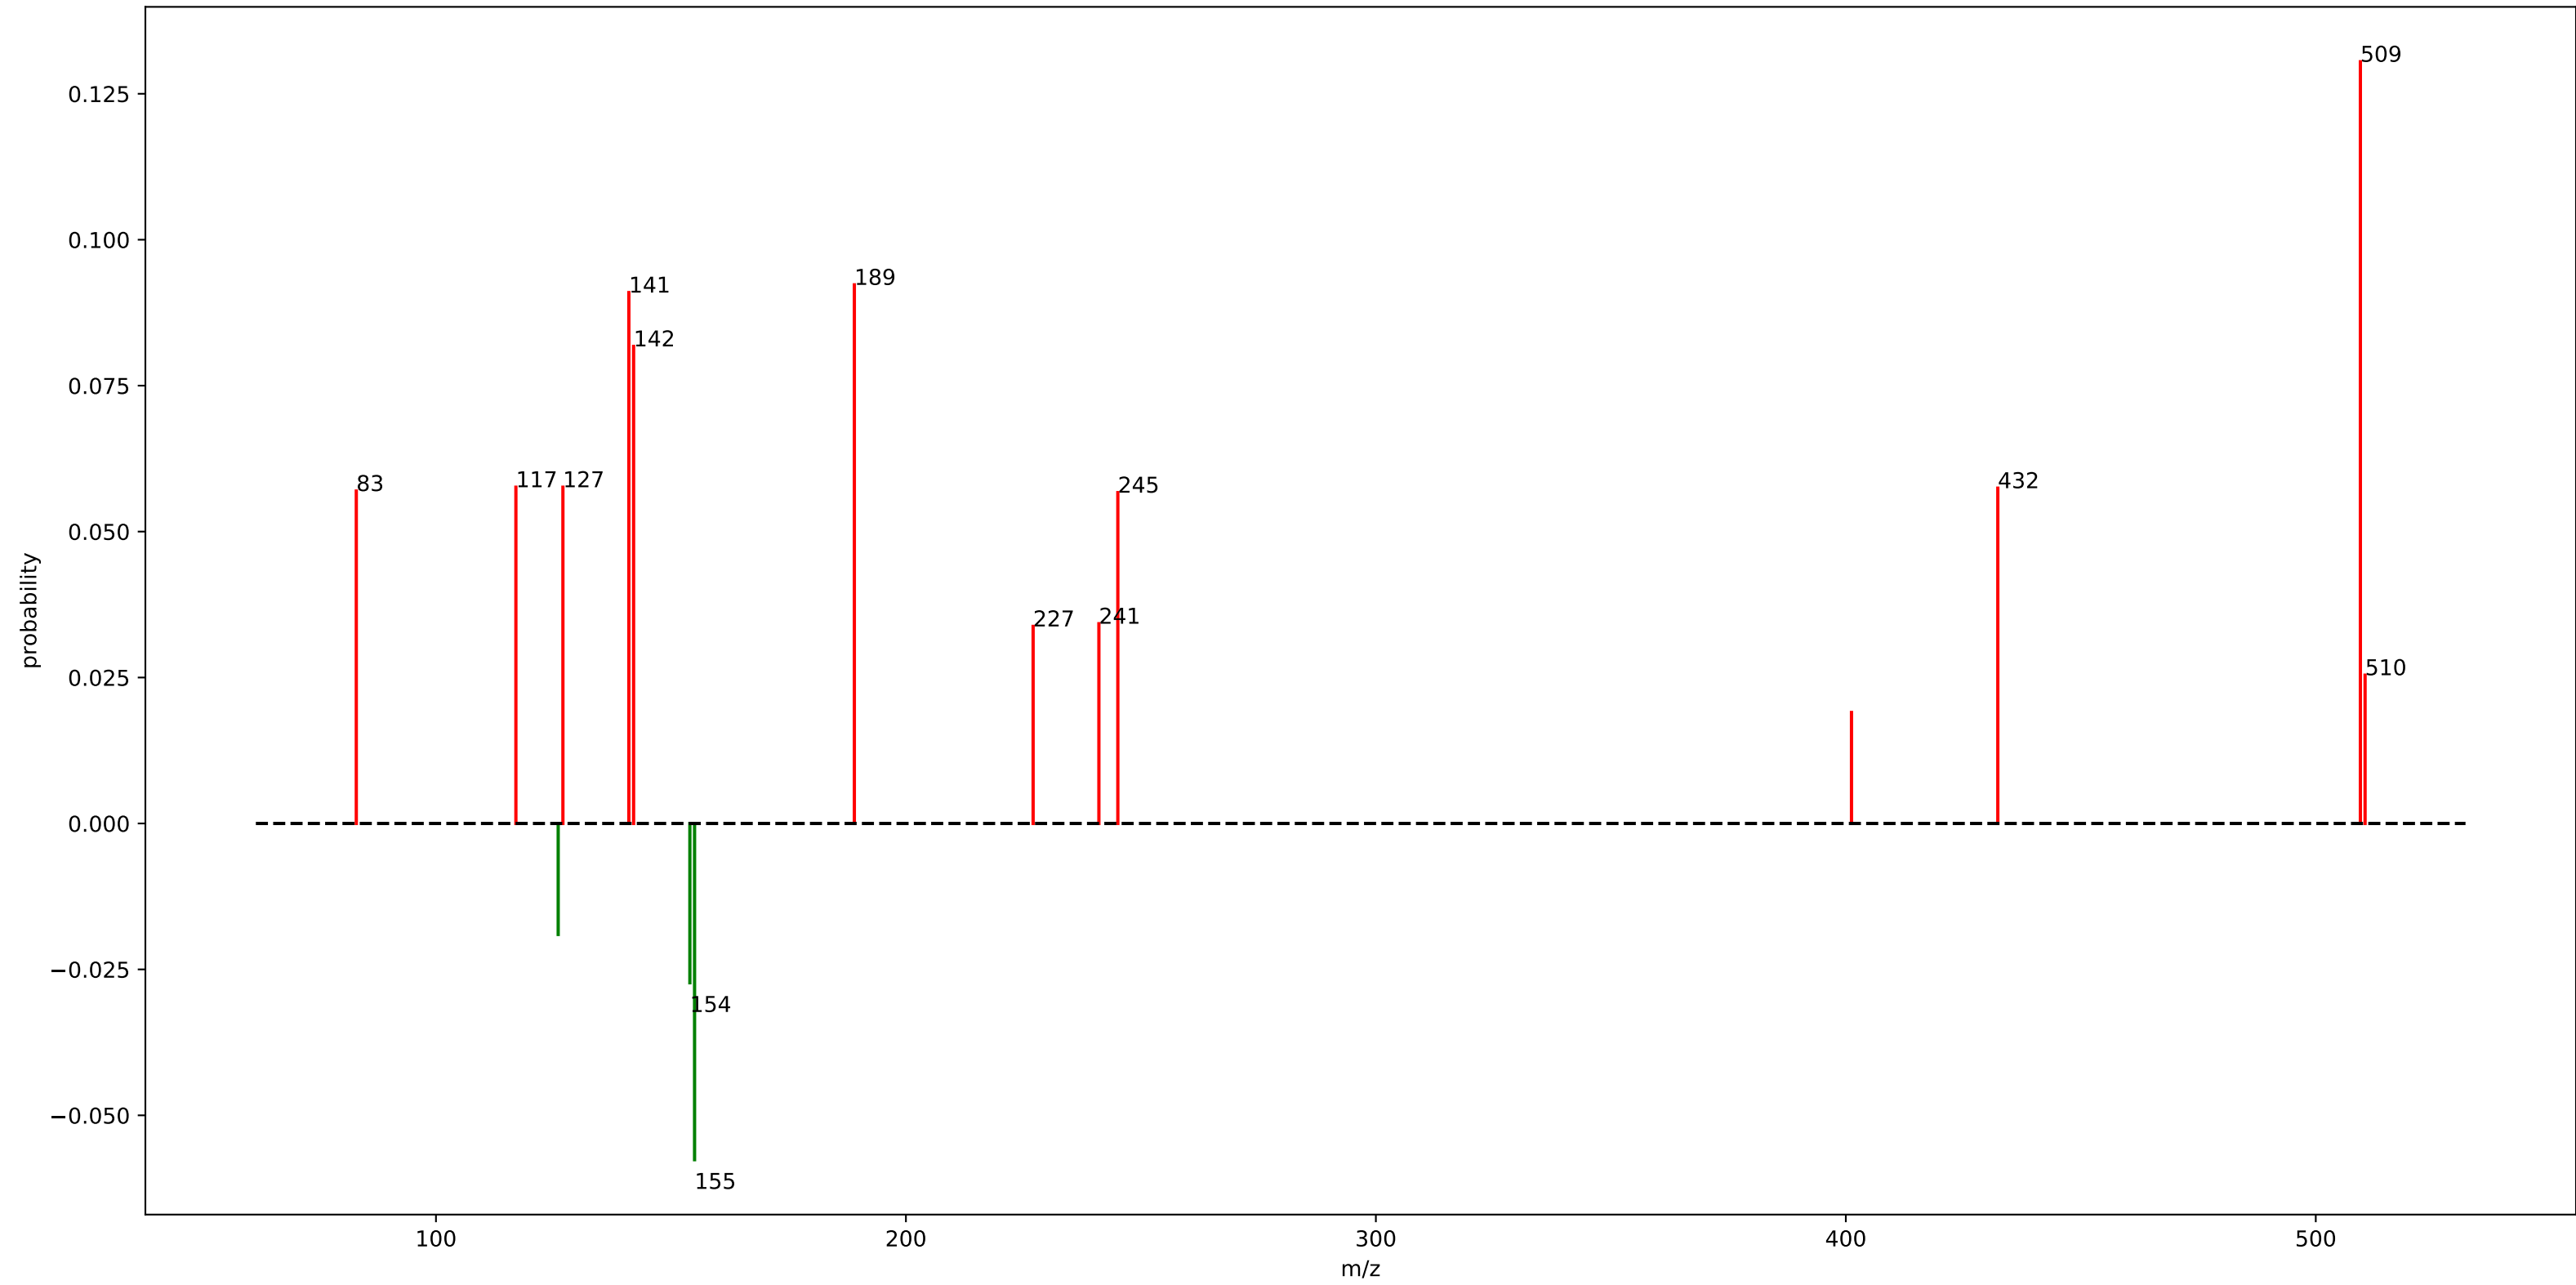

## motif\_548

|                   |        |
|-------------------|--------|
| fragment_509.4925 | : 0.13 |
| fragment_189.0275 | : 0.09 |
| fragment_141.0475 | : 0.09 |
| fragment_142.0525 | : 0.08 |
| fragment_117.0075 | : 0.06 |
| fragment_127.0125 | : 0.06 |
| loss_155.0275     | : 0.06 |
| fragment_432.3425 | : 0.06 |
| fragment_83.0475  | : 0.06 |
| fragment_245.0925 | : 0.06 |
| fragment_241.0625 | : 0.03 |
| fragment_227.0675 | : 0.03 |
| loss_154.0275     | : 0.03 |
| fragment_510.4925 | : 0.03 |
| fragment_401.2075 | : 0.02 |
| loss_126.0075     | : 0.02 |



motif\_549

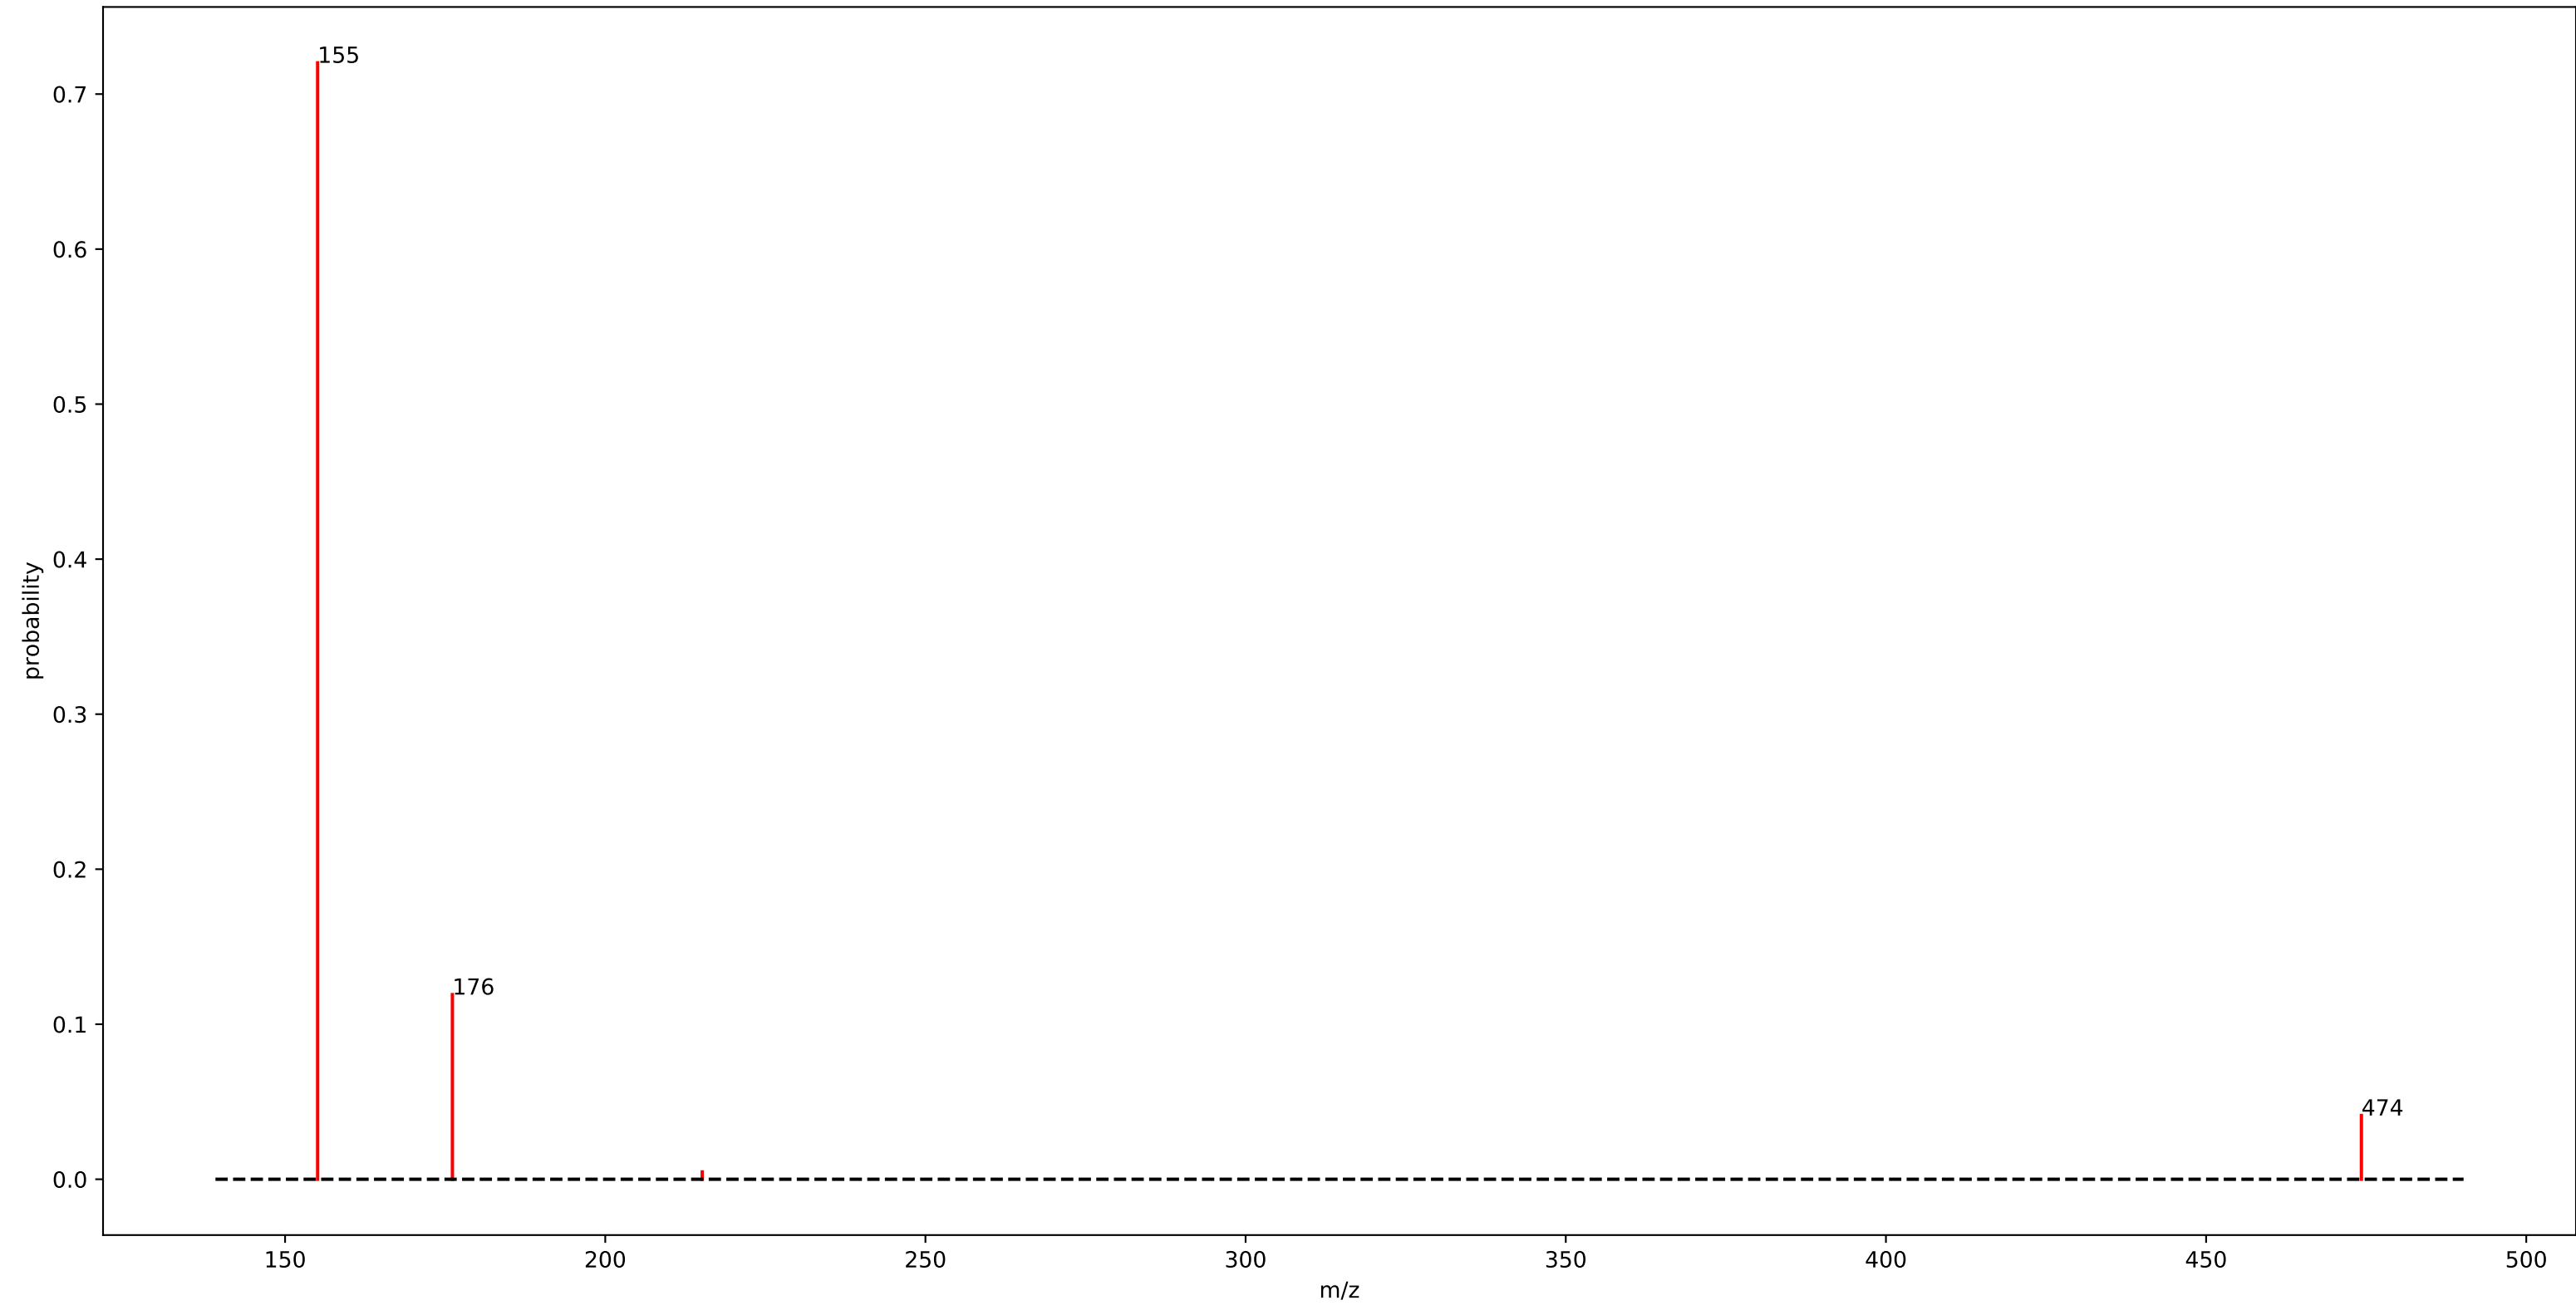

## motif\_549

|                   |        |
|-------------------|--------|
| fragment_155.0825 | : 0.72 |
| fragment_176.1275 | : 0.12 |
| fragment_474.2525 | : 0.04 |

motif\_581

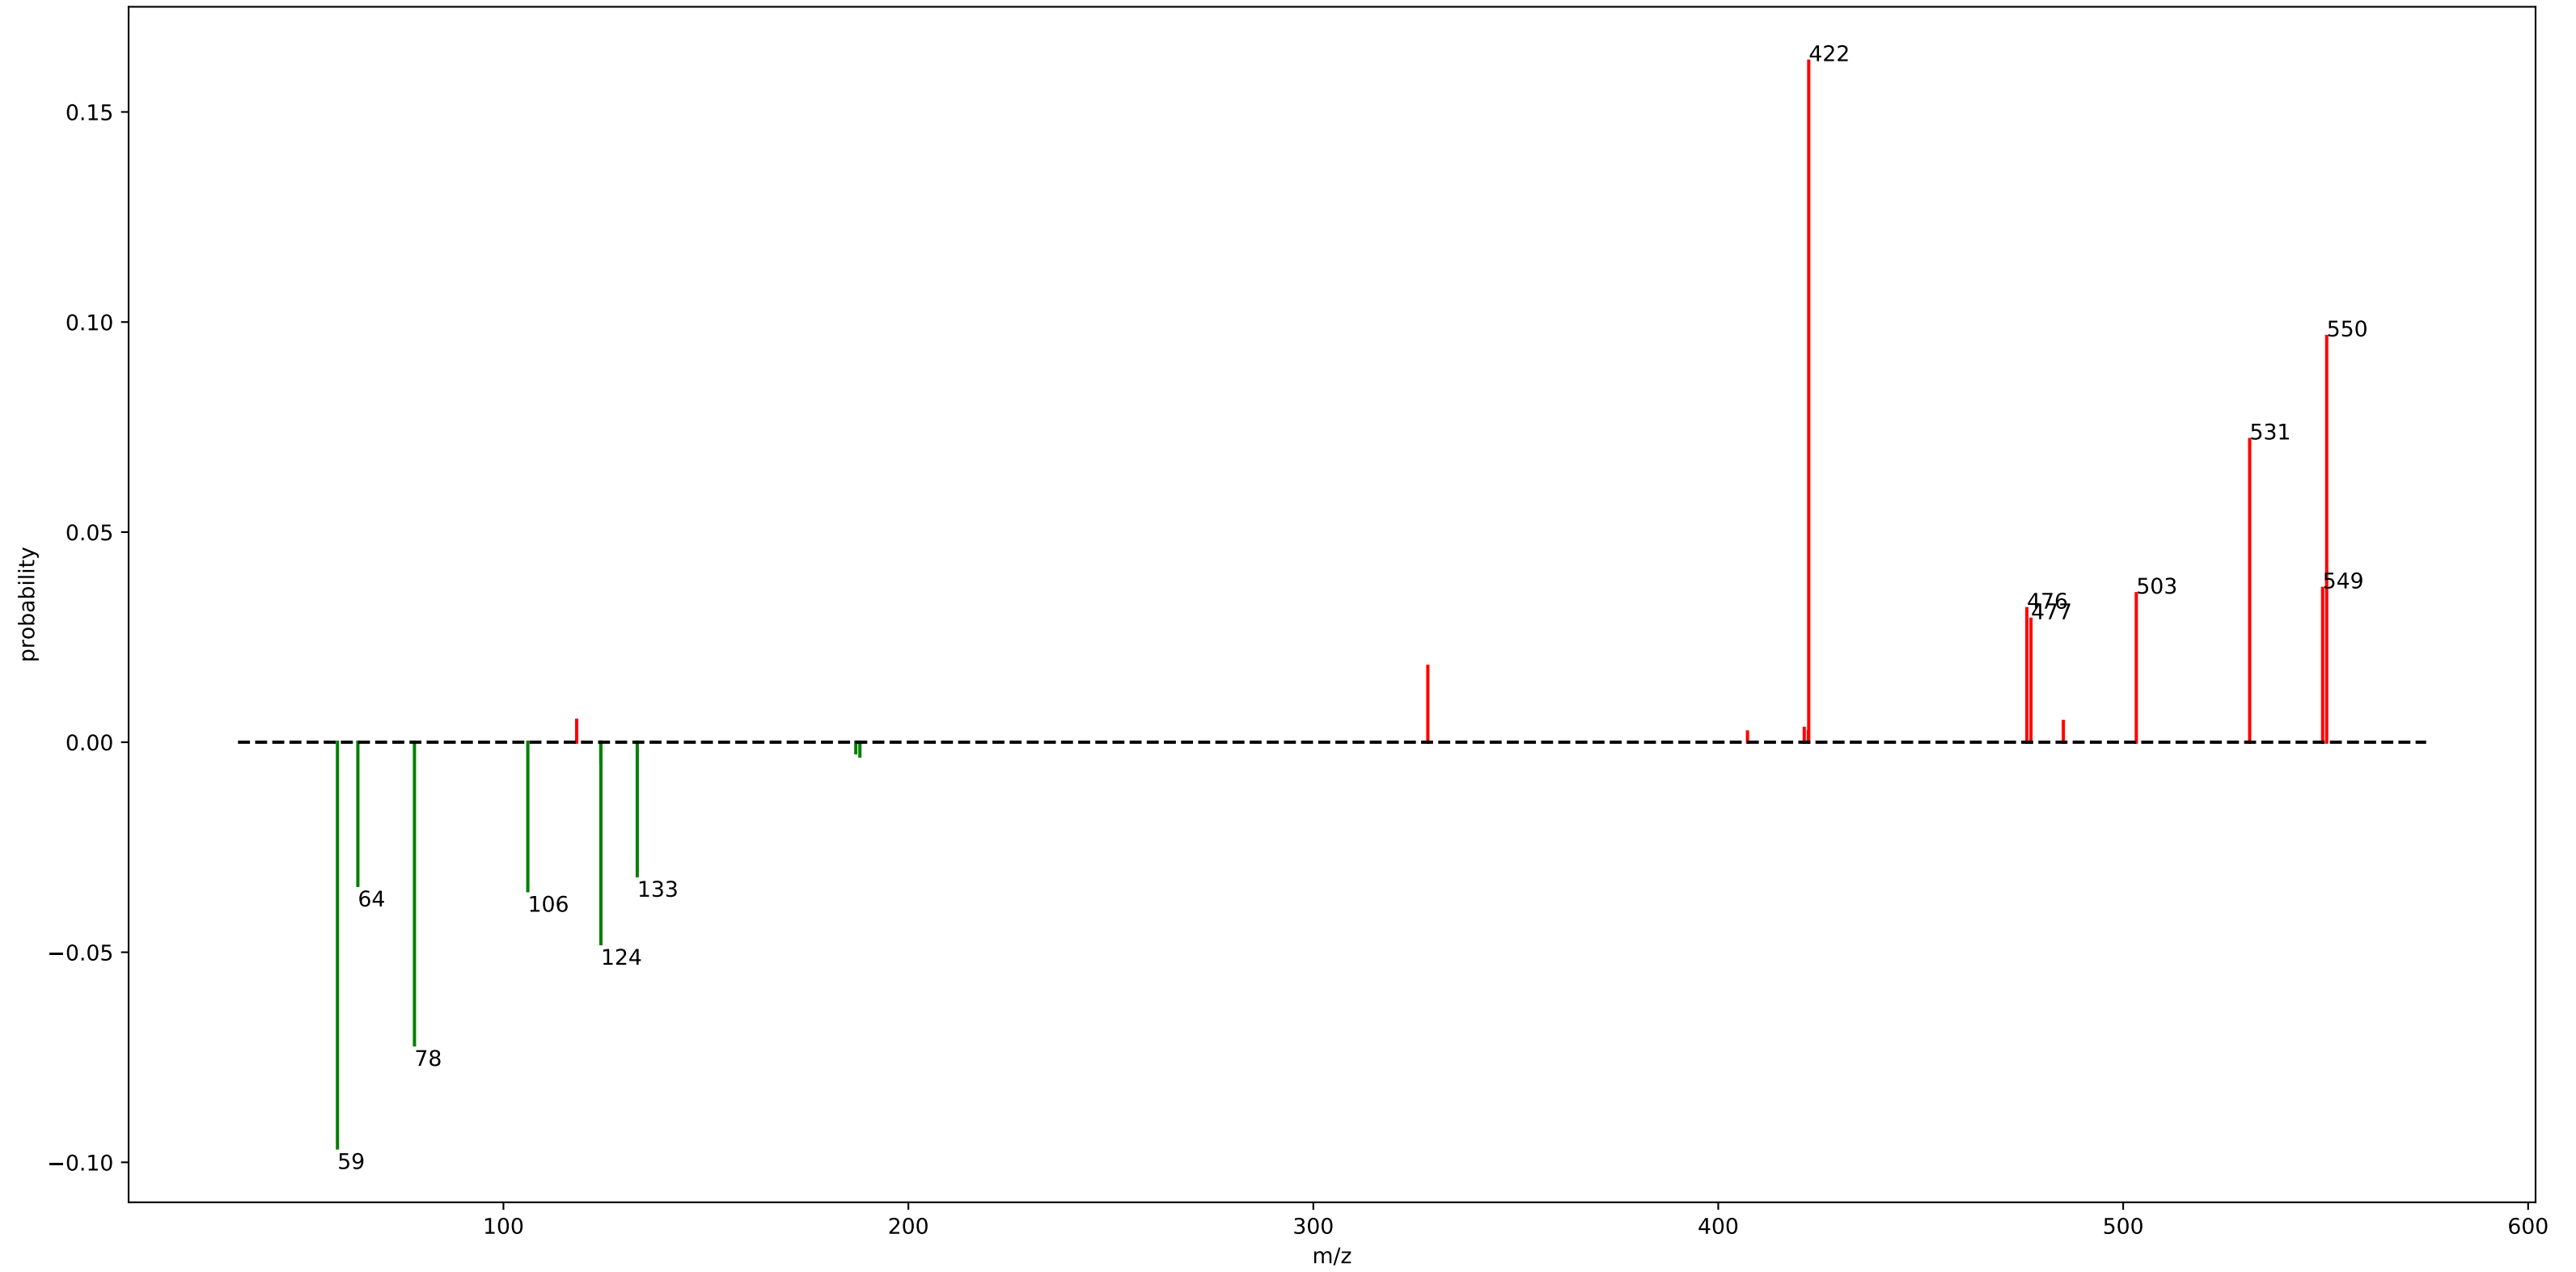

## motif\_581

|                   |        |
|-------------------|--------|
| fragment_422.3475 | : 0.16 |
| fragment_550.2575 | : 0.10 |
| loss_59.0125      | : 0.10 |
| fragment_531.2375 | : 0.07 |
| loss_78.0275      | : 0.07 |
| loss_124.0725     | : 0.05 |
| fragment_549.2525 | : 0.04 |
| fragment_503.2425 | : 0.04 |
| loss_106.0225     | : 0.04 |
| loss_64.0475      | : 0.03 |
| fragment_476.2225 | : 0.03 |
| loss_133.0475     | : 0.03 |
| fragment_477.2275 | : 0.03 |
| fragment_328.2825 | : 0.02 |
| fragment_118.0875 | : 0.01 |

motif\_544

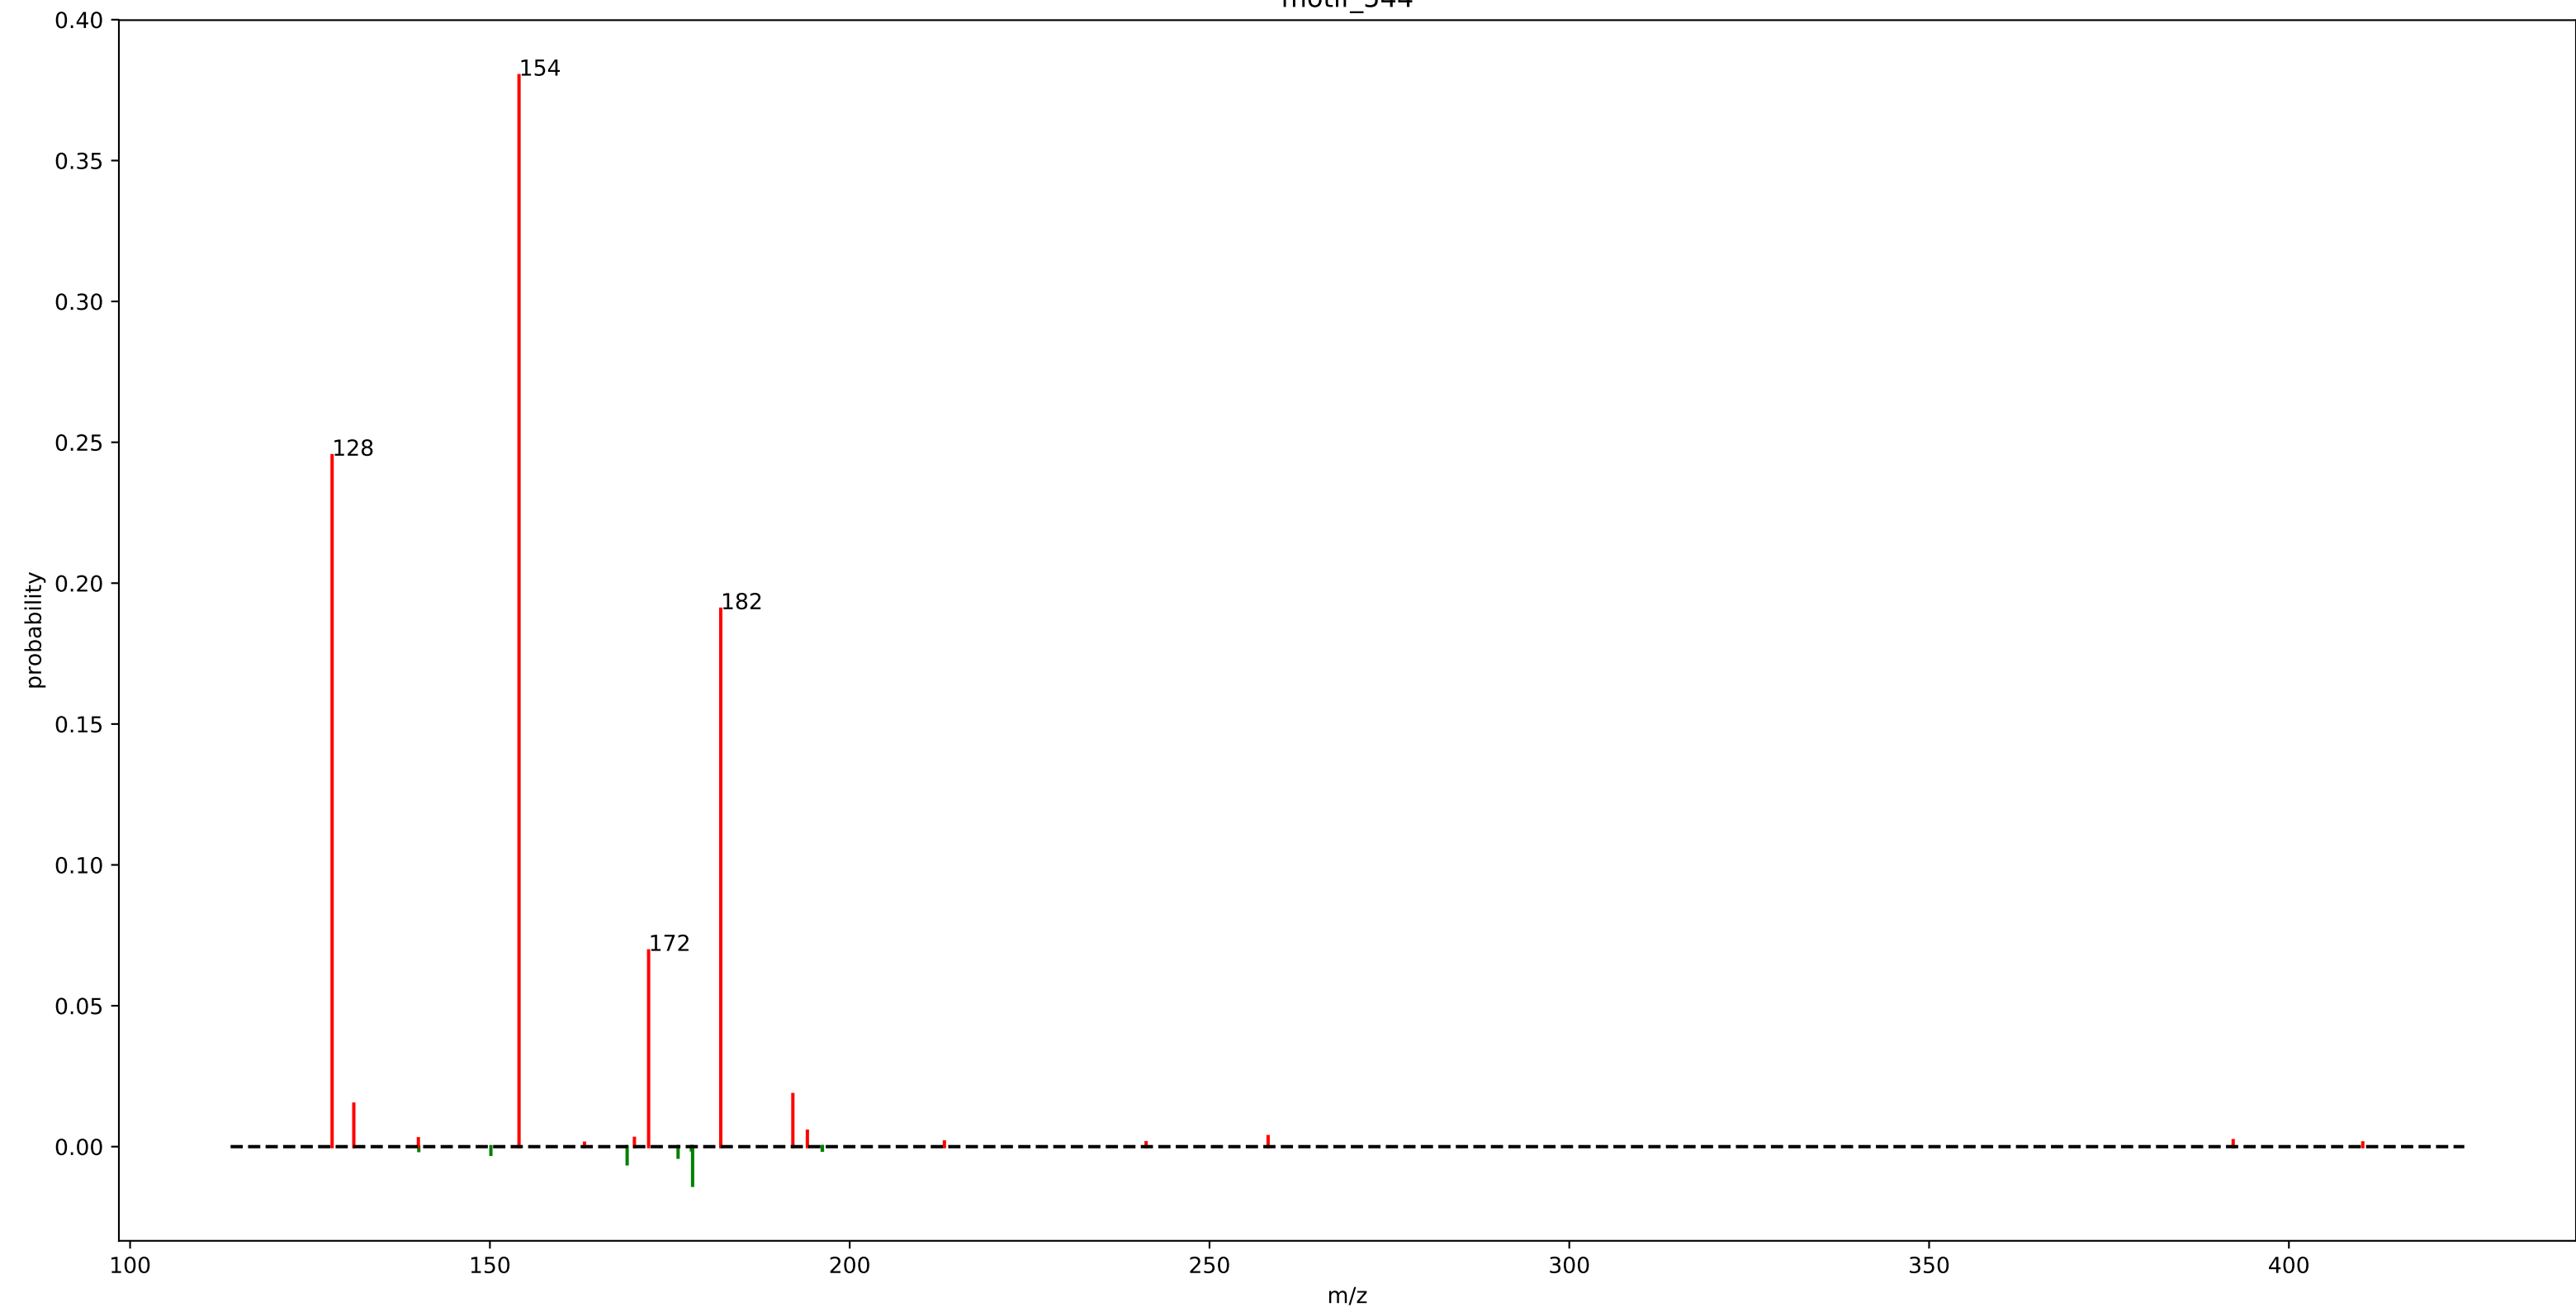

## motif\_544

|                   |        |
|-------------------|--------|
| fragment_154.0475 | : 0.38 |
| fragment_128.0725 | : 0.25 |
| fragment_182.0825 | : 0.19 |
| fragment_172.0575 | : 0.07 |
| fragment_192.1025 | : 0.02 |
| fragment_131.0875 | : 0.02 |
| loss_178.1675     | : 0.01 |
| loss_169.0725     | : 0.01 |
| fragment_194.1175 | : 0.01 |

motif\_545

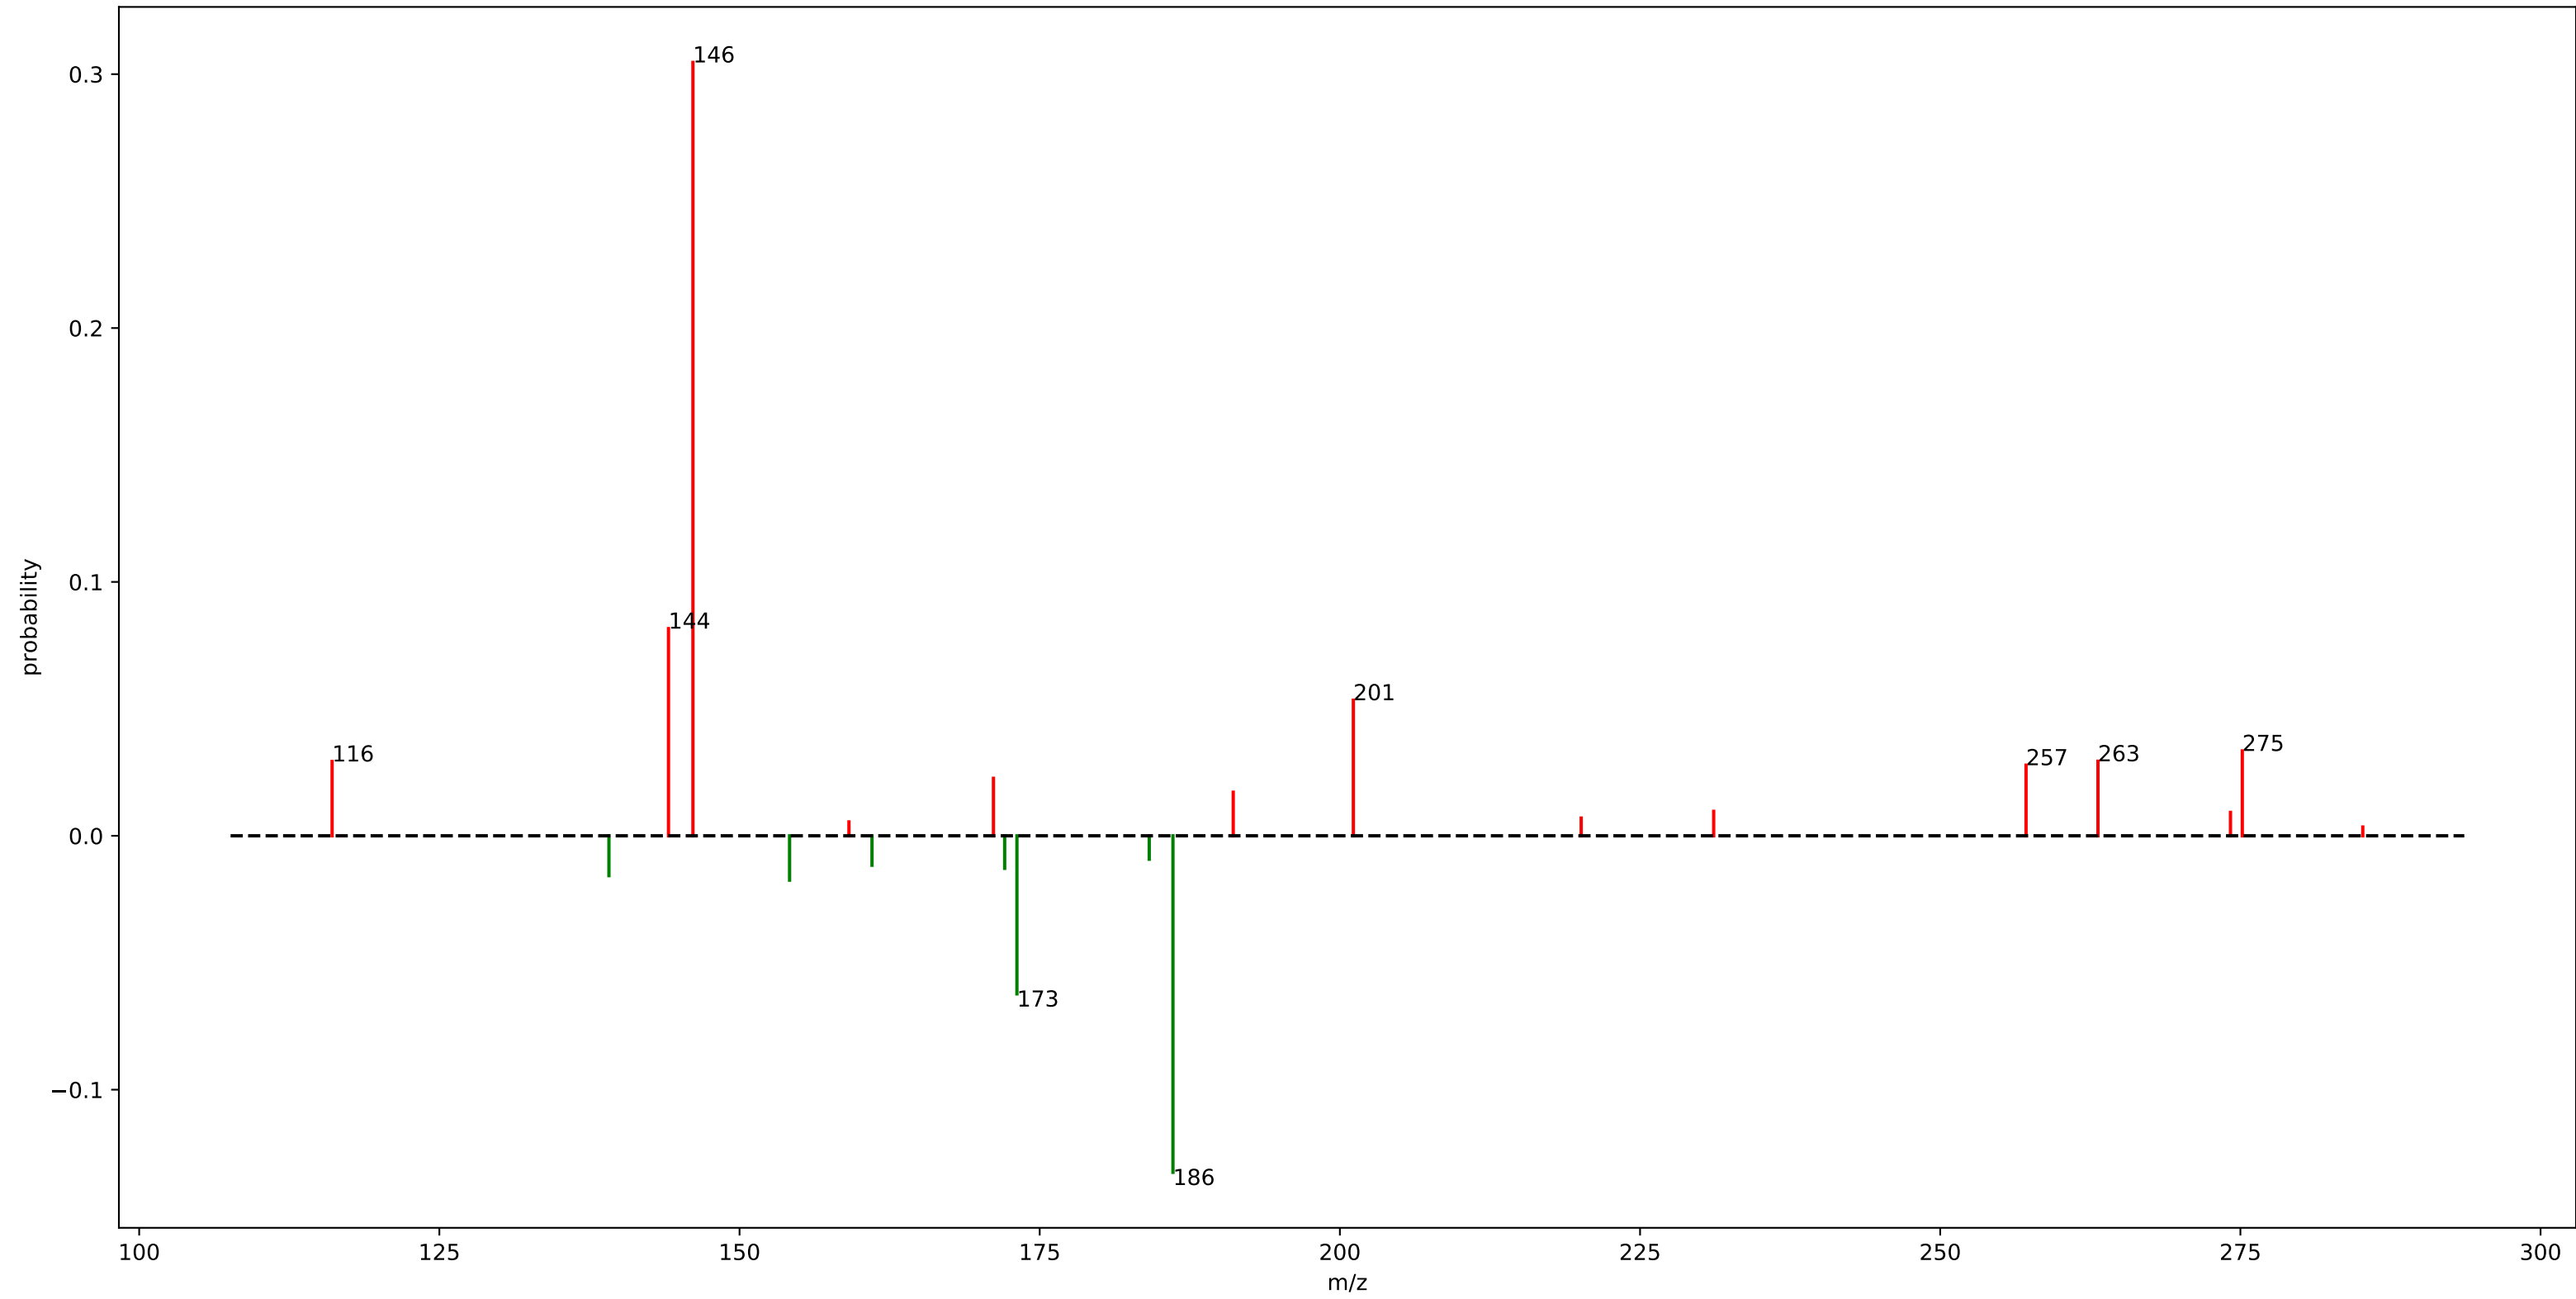

## motif\_545

|                   |        |
|-------------------|--------|
| fragment_146.1175 | : 0.30 |
| loss_186.0975     | : 0.13 |
| fragment_144.0825 | : 0.08 |
| loss_173.1025     | : 0.06 |
| fragment_201.1225 | : 0.05 |
| fragment_275.1575 | : 0.03 |
| fragment_263.1375 | : 0.03 |
| fragment_116.0675 | : 0.03 |
| fragment_257.1475 | : 0.03 |
| fragment_171.1475 | : 0.02 |
| loss_154.1675     | : 0.02 |
| fragment_191.1175 | : 0.02 |
| loss_139.1225     | : 0.02 |
| loss_172.0825     | : 0.01 |
| loss_161.0325     | : 0.01 |
| fragment_231.1325 | : 0.01 |
| loss_184.1225     | : 0.01 |
| fragment_274.1725 | : 0.01 |
| fragment_220.0975 | : 0.01 |
| fragment_159.1125 | : 0.01 |



motif\_546

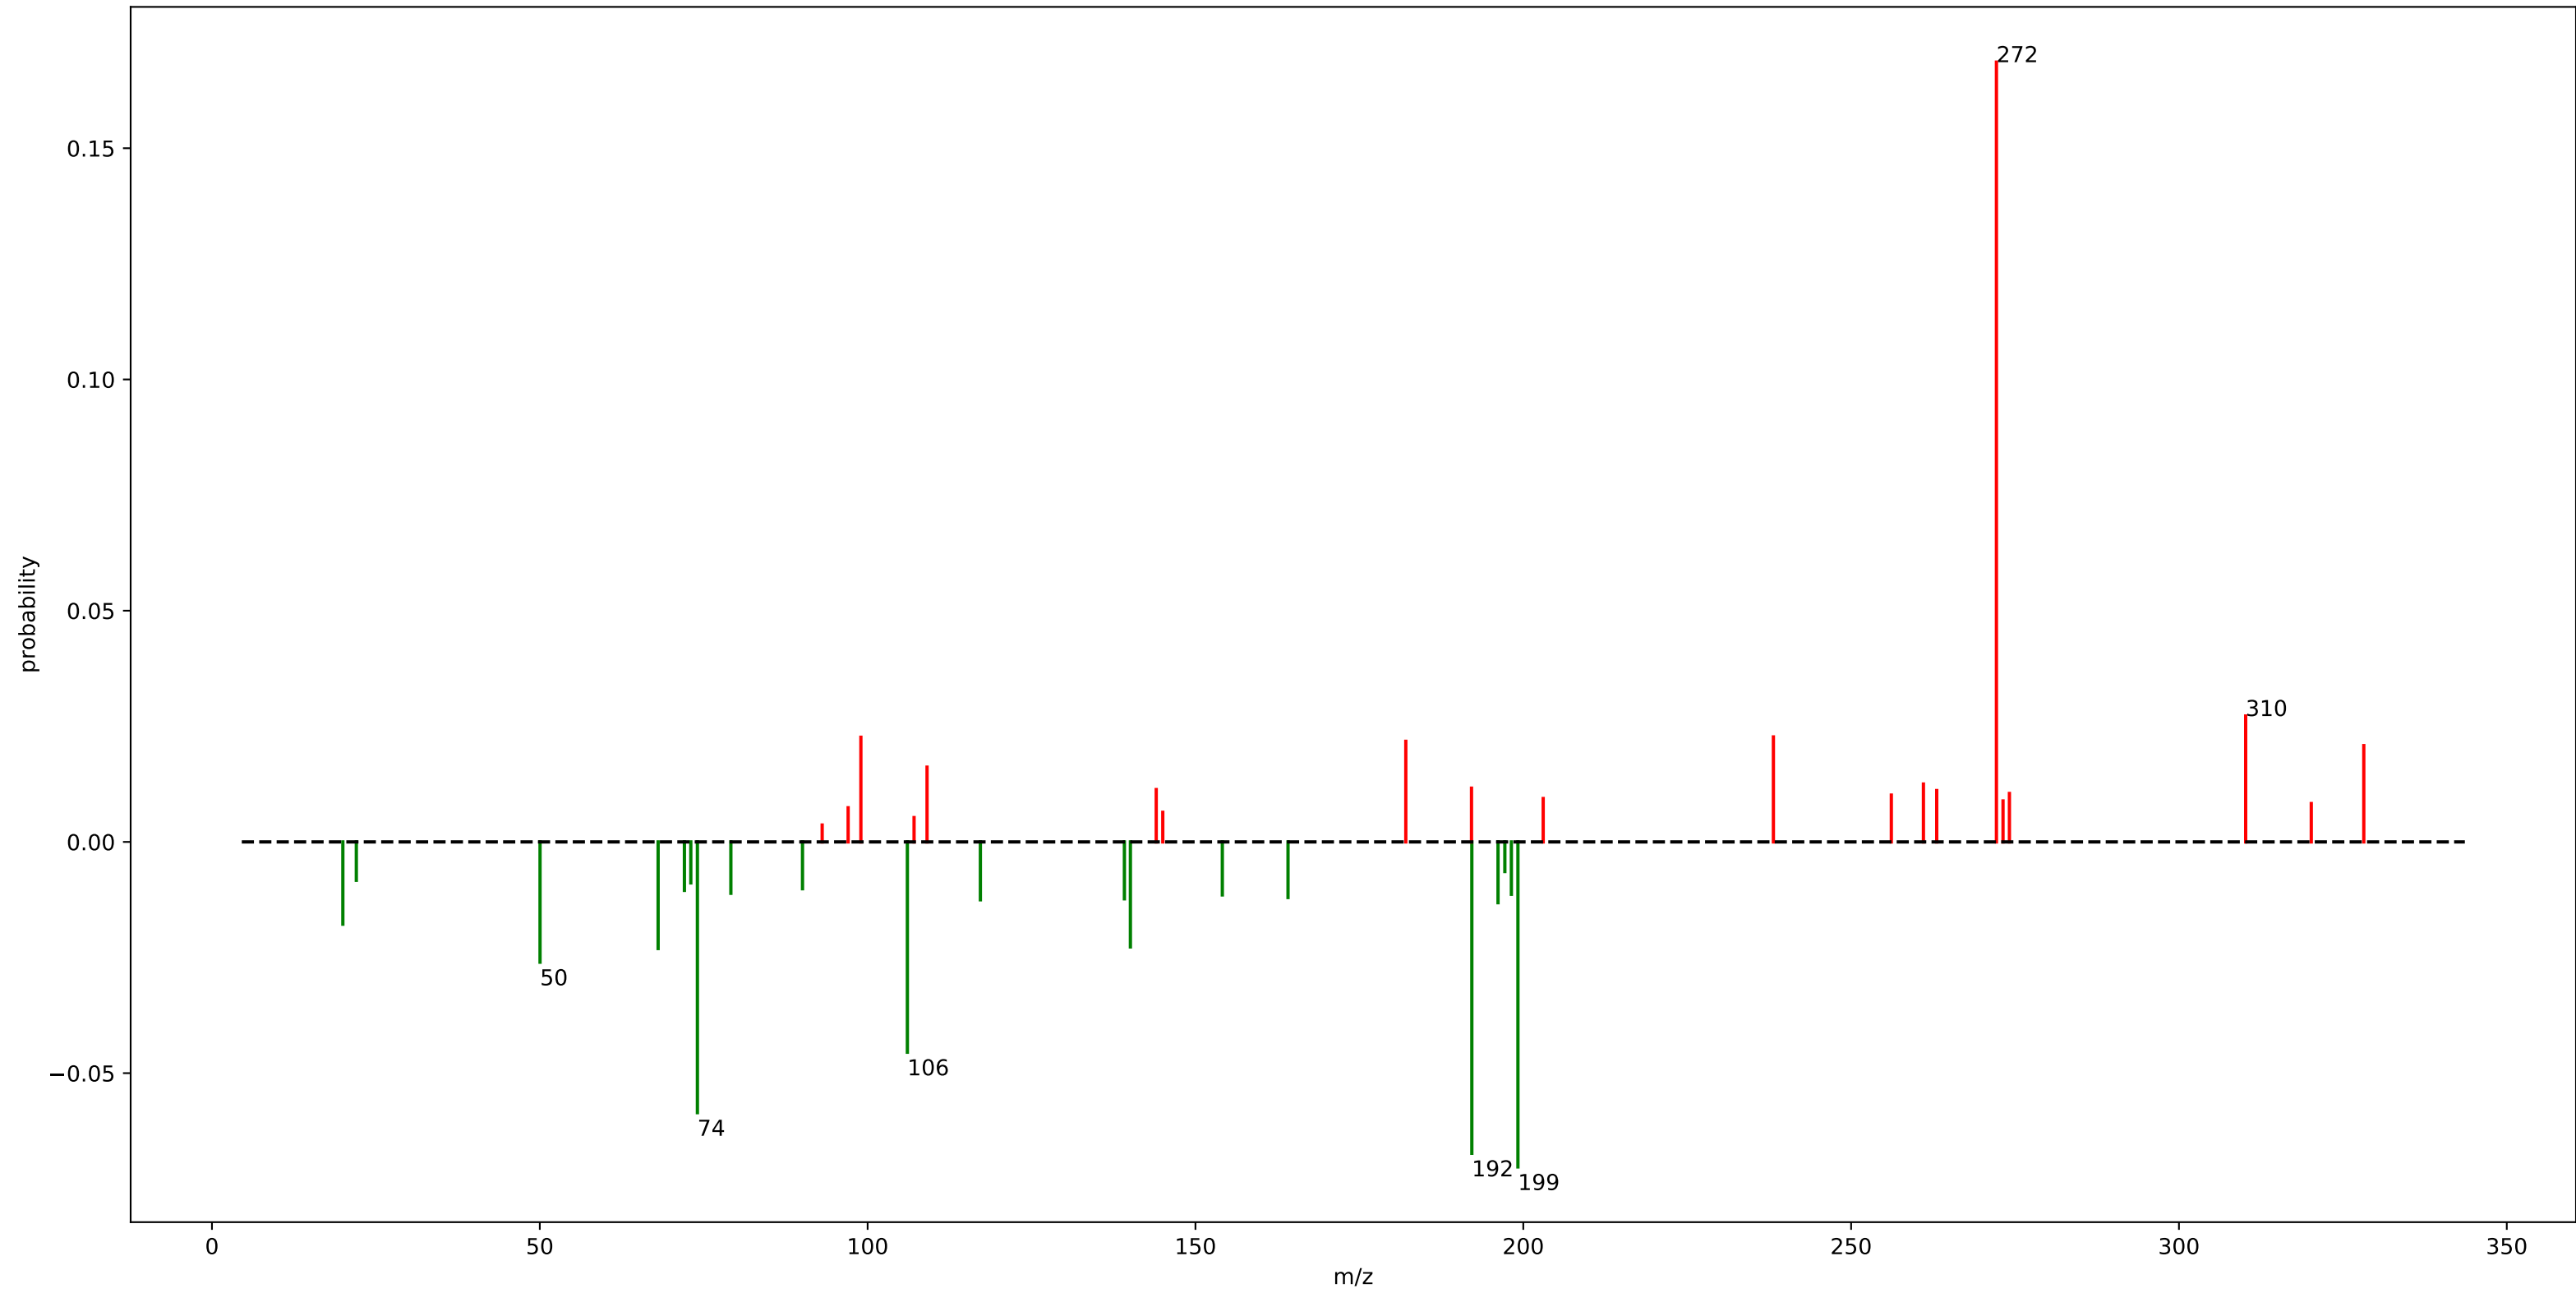

# motif\_546

|                   |        |                   |        |
|-------------------|--------|-------------------|--------|
| fragment_272.1625 | : 0.17 | fragment_192.1025 | : 0.01 |
| loss_199.1825     | : 0.07 | loss_154.0975     | : 0.01 |
| loss_192.1525     | : 0.07 | fragment_144.0175 | : 0.01 |
| loss_74.0375      | : 0.06 | loss_198.1825     | : 0.01 |
| loss_106.0625     | : 0.05 | loss_79.1425      | : 0.01 |
| fragment_310.1775 | : 0.03 | fragment_263.0575 | : 0.01 |
| loss_50.0375      | : 0.03 | loss_72.0575      | : 0.01 |
| loss_68.0475      | : 0.02 | fragment_274.1425 | : 0.01 |
| fragment_238.1475 | : 0.02 | fragment_256.1325 | : 0.01 |
| loss_140.0775     | : 0.02 | loss_90.0675      | : 0.01 |
| fragment_98.9725  | : 0.02 | fragment_203.0375 | : 0.01 |
| fragment_182.0825 | : 0.02 | loss_73.0325      | : 0.01 |
| fragment_328.1925 | : 0.02 | fragment_273.1675 | : 0.01 |
| loss_19.9625      | : 0.02 | loss_22.0175      | : 0.01 |
| fragment_109.0625 | : 0.02 | fragment_320.1825 | : 0.01 |
| loss_196.1475     | : 0.01 | fragment_97.0275  | : 0.01 |
| loss_117.1975     | : 0.01 | loss_197.1875     | : 0.01 |
| fragment_261.0275 | : 0.01 | fragment_145.0175 | : 0.01 |
| loss_139.1625     | : 0.01 | fragment_107.0825 | : 0.01 |
| loss_164.1175     | : 0.01 |                   |        |

motif\_547

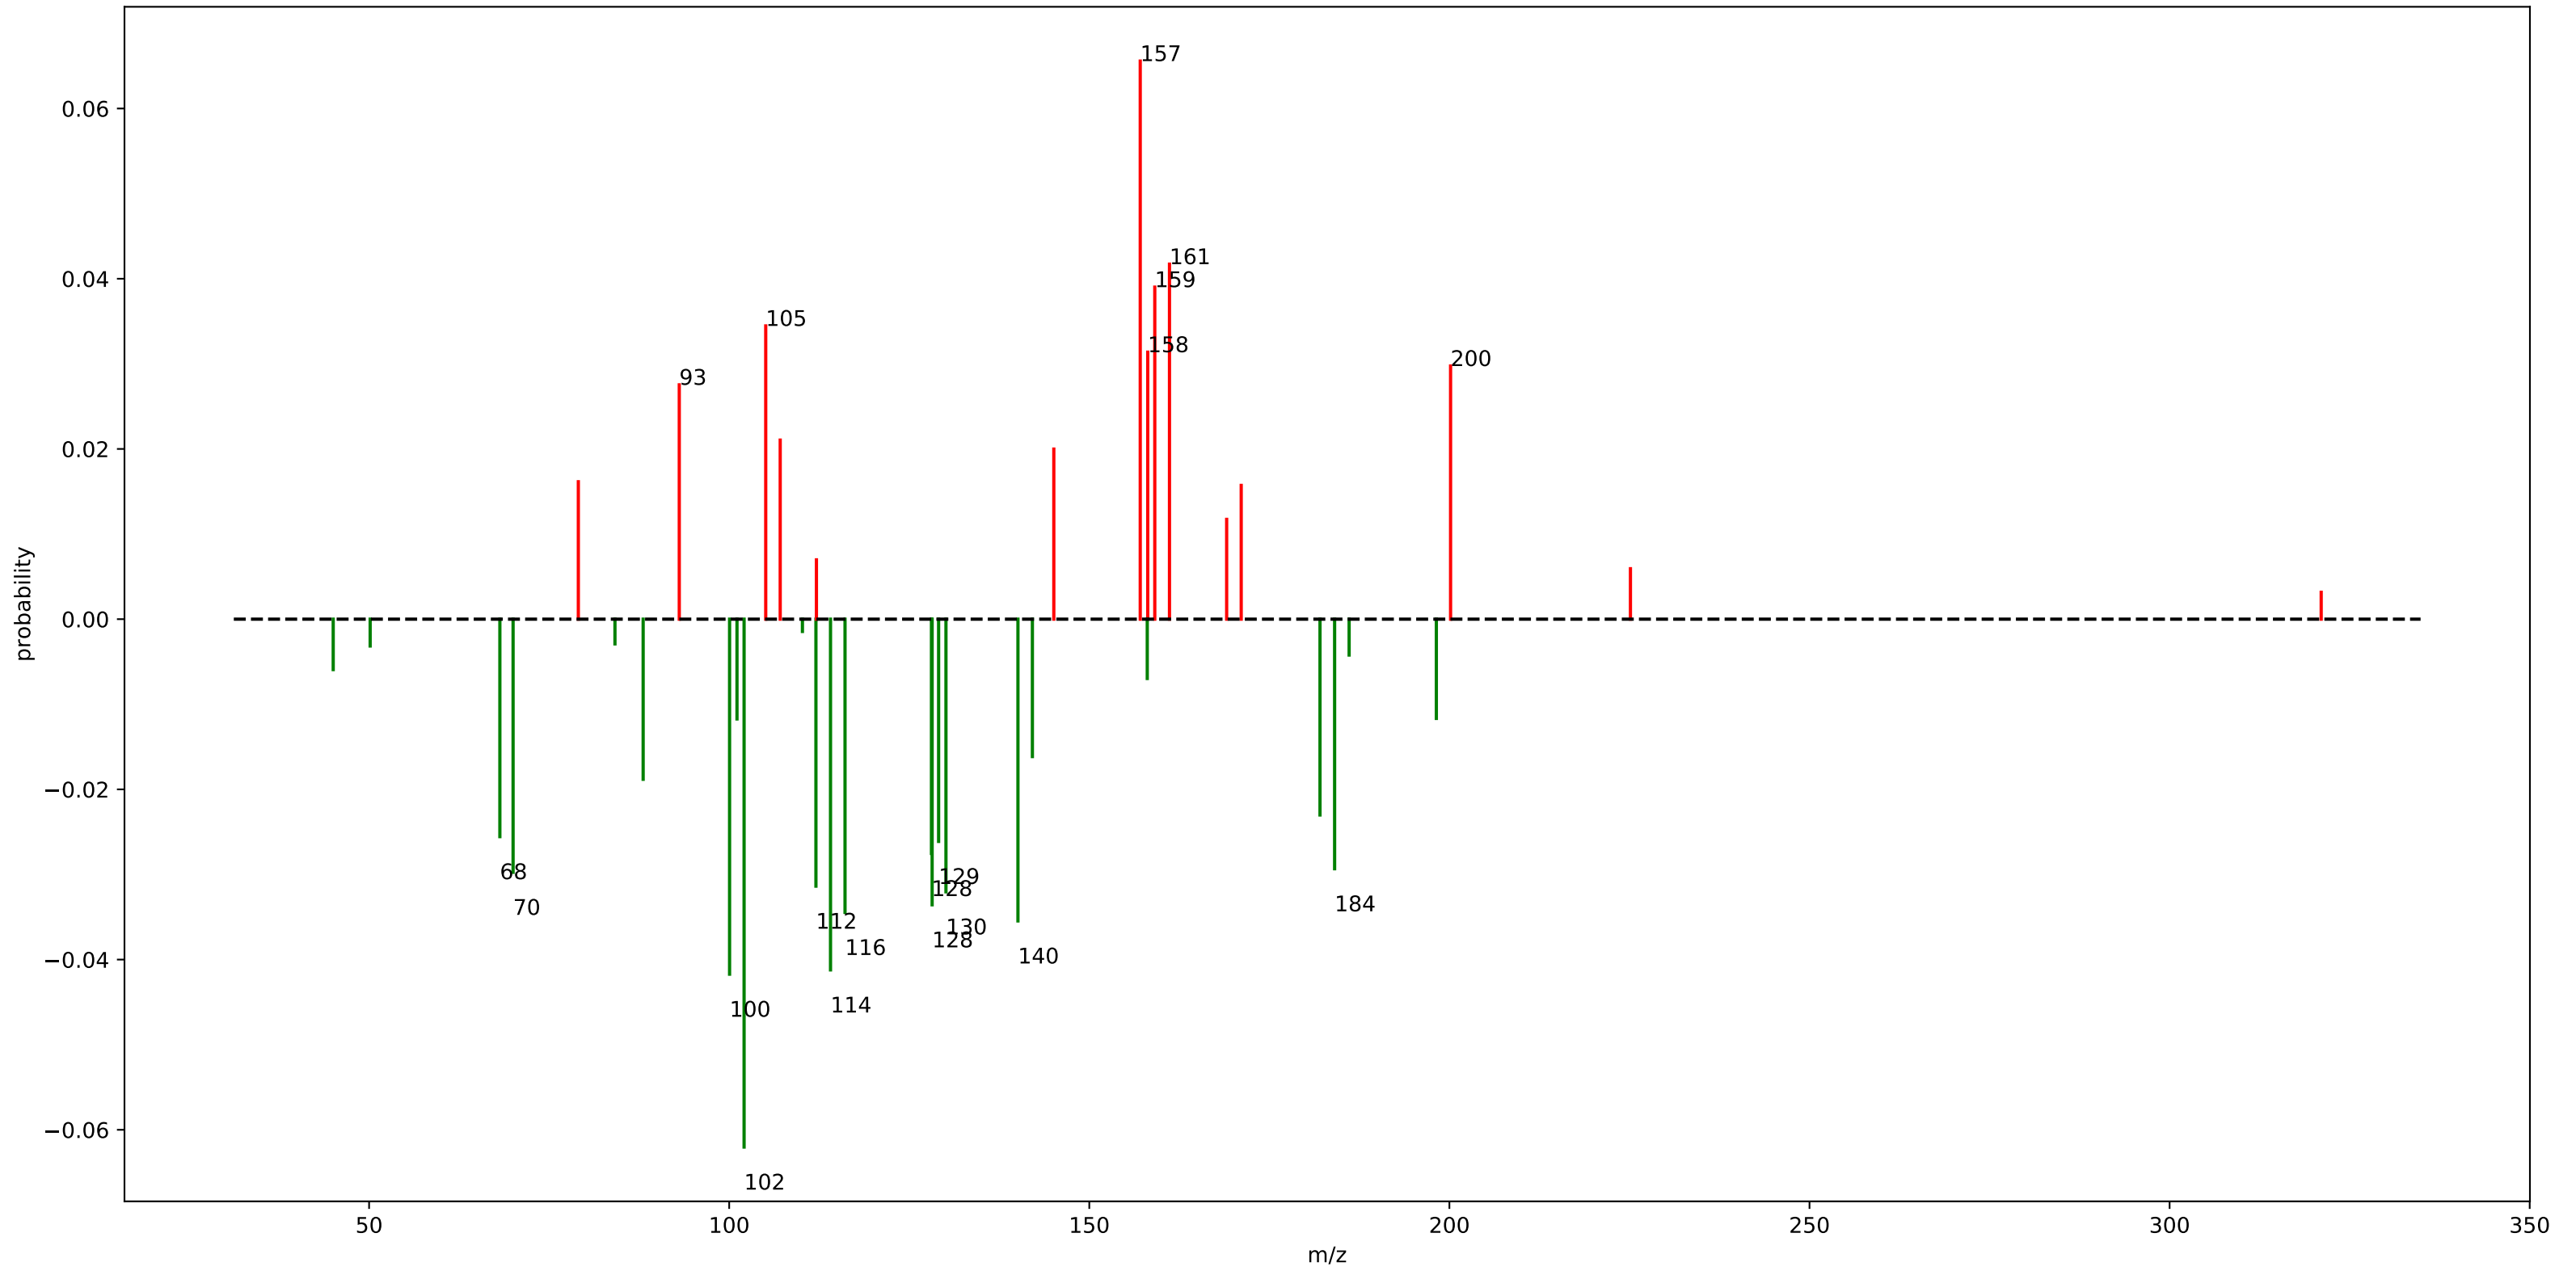

# motif\_547

|                   |        |                   |        |
|-------------------|--------|-------------------|--------|
| fragment_157.0725 | : 0.07 | loss_182.0325     | : 0.02 |
| loss_102.0675     | : 0.06 | fragment_107.0825 | : 0.02 |
| loss_100.0525     | : 0.04 | fragment_145.0725 | : 0.02 |
| fragment_161.1325 | : 0.04 | loss_88.0525      | : 0.02 |
| loss_114.0675     | : 0.04 | fragment_79.0525  | : 0.02 |
| fragment_159.0925 | : 0.04 | loss_142.0975     | : 0.02 |
| loss_140.0925     | : 0.04 | fragment_171.0925 | : 0.02 |
| loss_116.0825     | : 0.03 | fragment_169.0725 | : 0.01 |
| fragment_105.0725 | : 0.03 | loss_101.0825     | : 0.01 |
| loss_128.1775     | : 0.03 | loss_198.1875     | : 0.01 |
| loss_130.0975     | : 0.03 | fragment_112.1125 | : 0.01 |
| loss_112.0425     | : 0.03 | loss_158.0475     | : 0.01 |
| fragment_158.1175 | : 0.03 | loss_45.0175      | : 0.01 |
| fragment_200.1625 | : 0.03 | fragment_225.1375 | : 0.01 |
| loss_69.9925      | : 0.03 |                   |        |
| loss_184.0625     | : 0.03 |                   |        |
| loss_128.0825     | : 0.03 |                   |        |
| fragment_93.0675  | : 0.03 |                   |        |
| loss_129.0775     | : 0.03 |                   |        |
| loss_68.1575      | : 0.03 |                   |        |

motif\_540

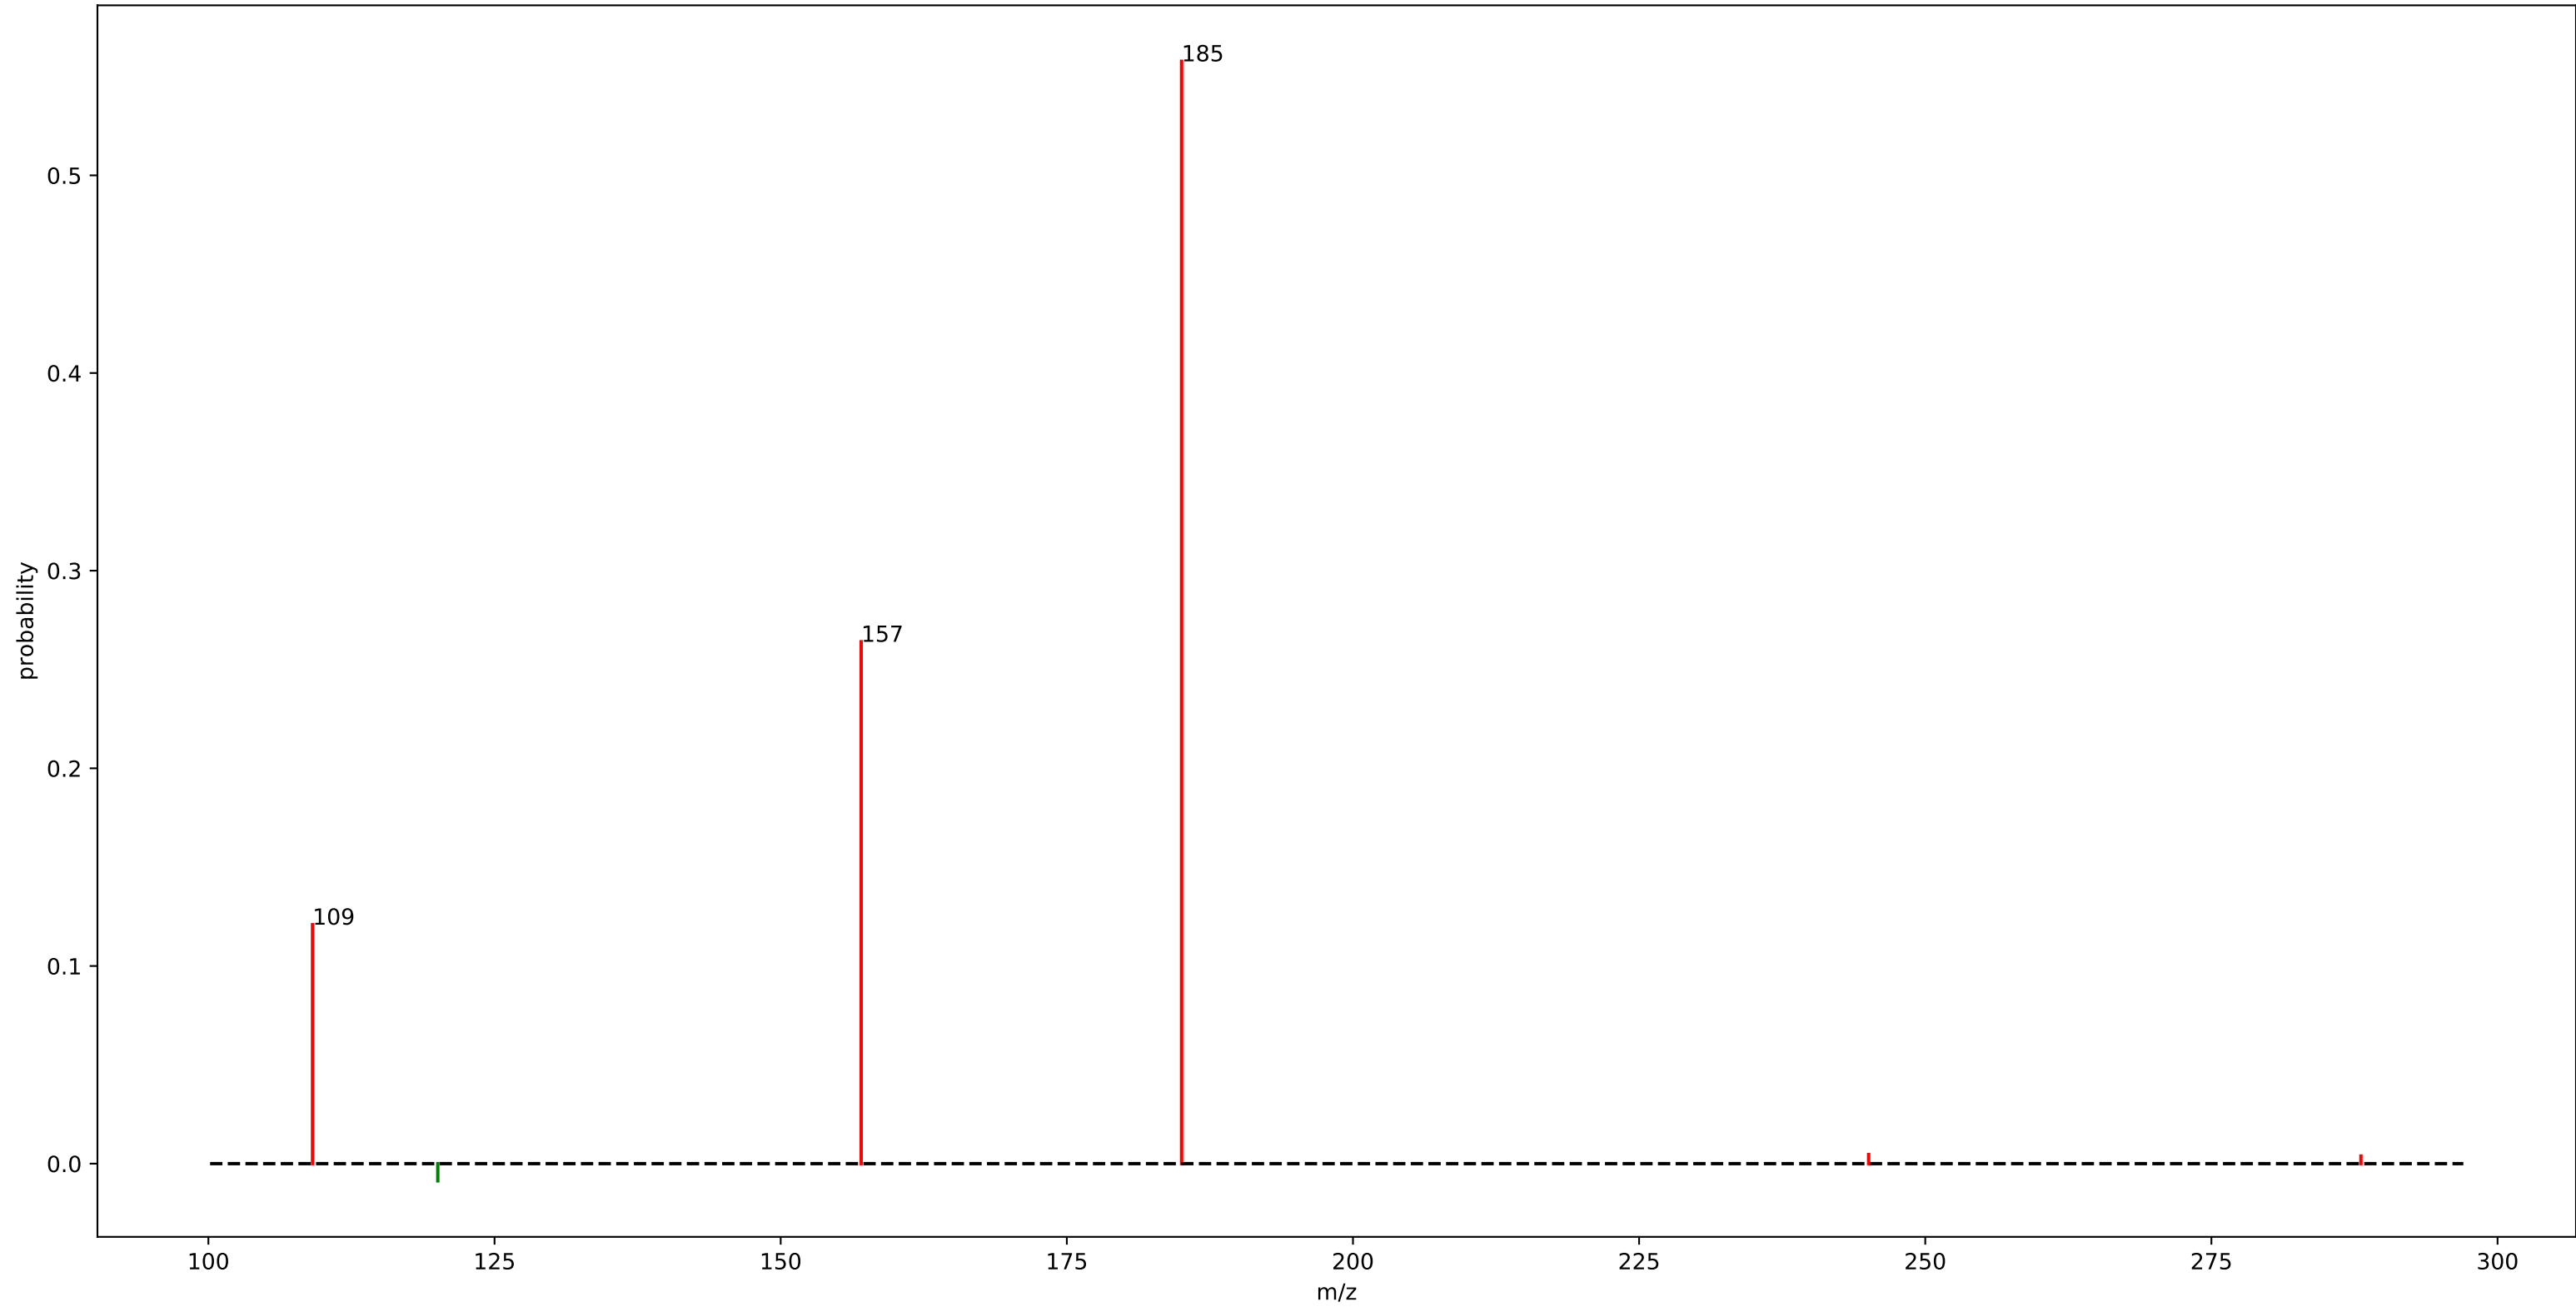

## motif\_540

|                   |        |
|-------------------|--------|
| fragment_185.0275 | : 0.56 |
| fragment_157.0325 | : 0.26 |
| fragment_109.0975 | : 0.12 |
| loss_120.0425     | : 0.01 |

motif\_541

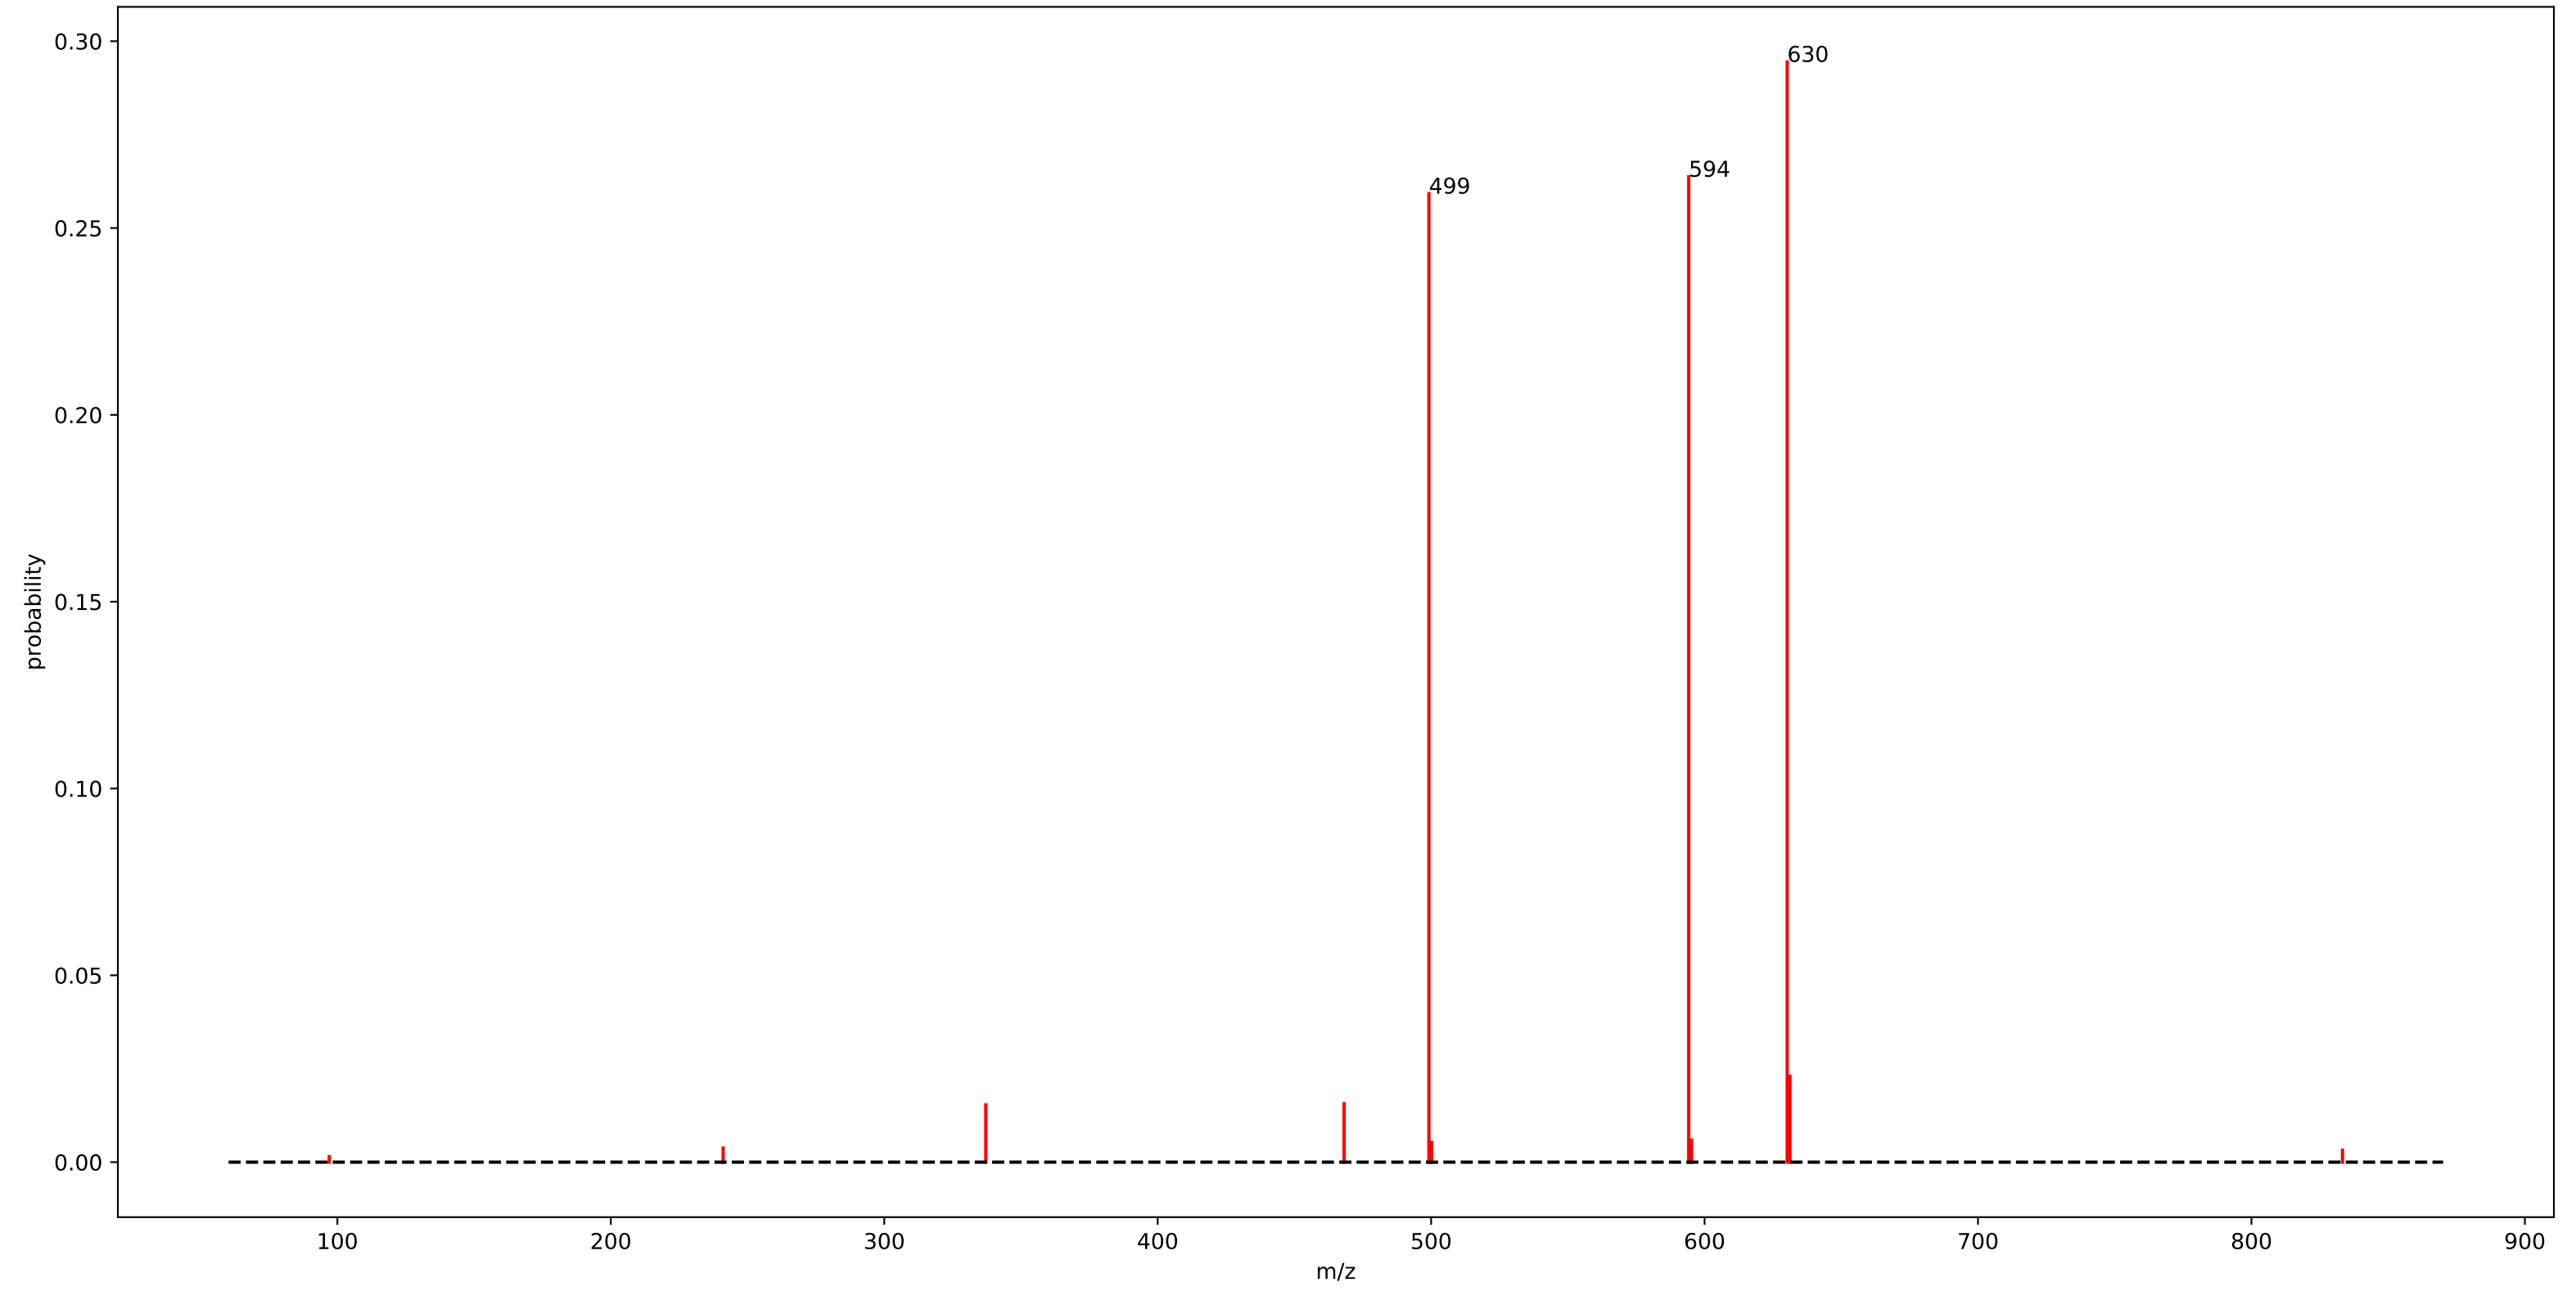

## motif\_541

|                   |        |
|-------------------|--------|
| fragment_630.2225 | : 0.29 |
| fragment_594.2025 | : 0.26 |
| fragment_499.1825 | : 0.26 |
| fragment_631.2275 | : 0.02 |
| fragment_468.1725 | : 0.02 |
| fragment_337.1325 | : 0.02 |
| fragment_595.2075 | : 0.01 |
| fragment_500.1875 | : 0.01 |



euphorbia\_motif\_95.m2m

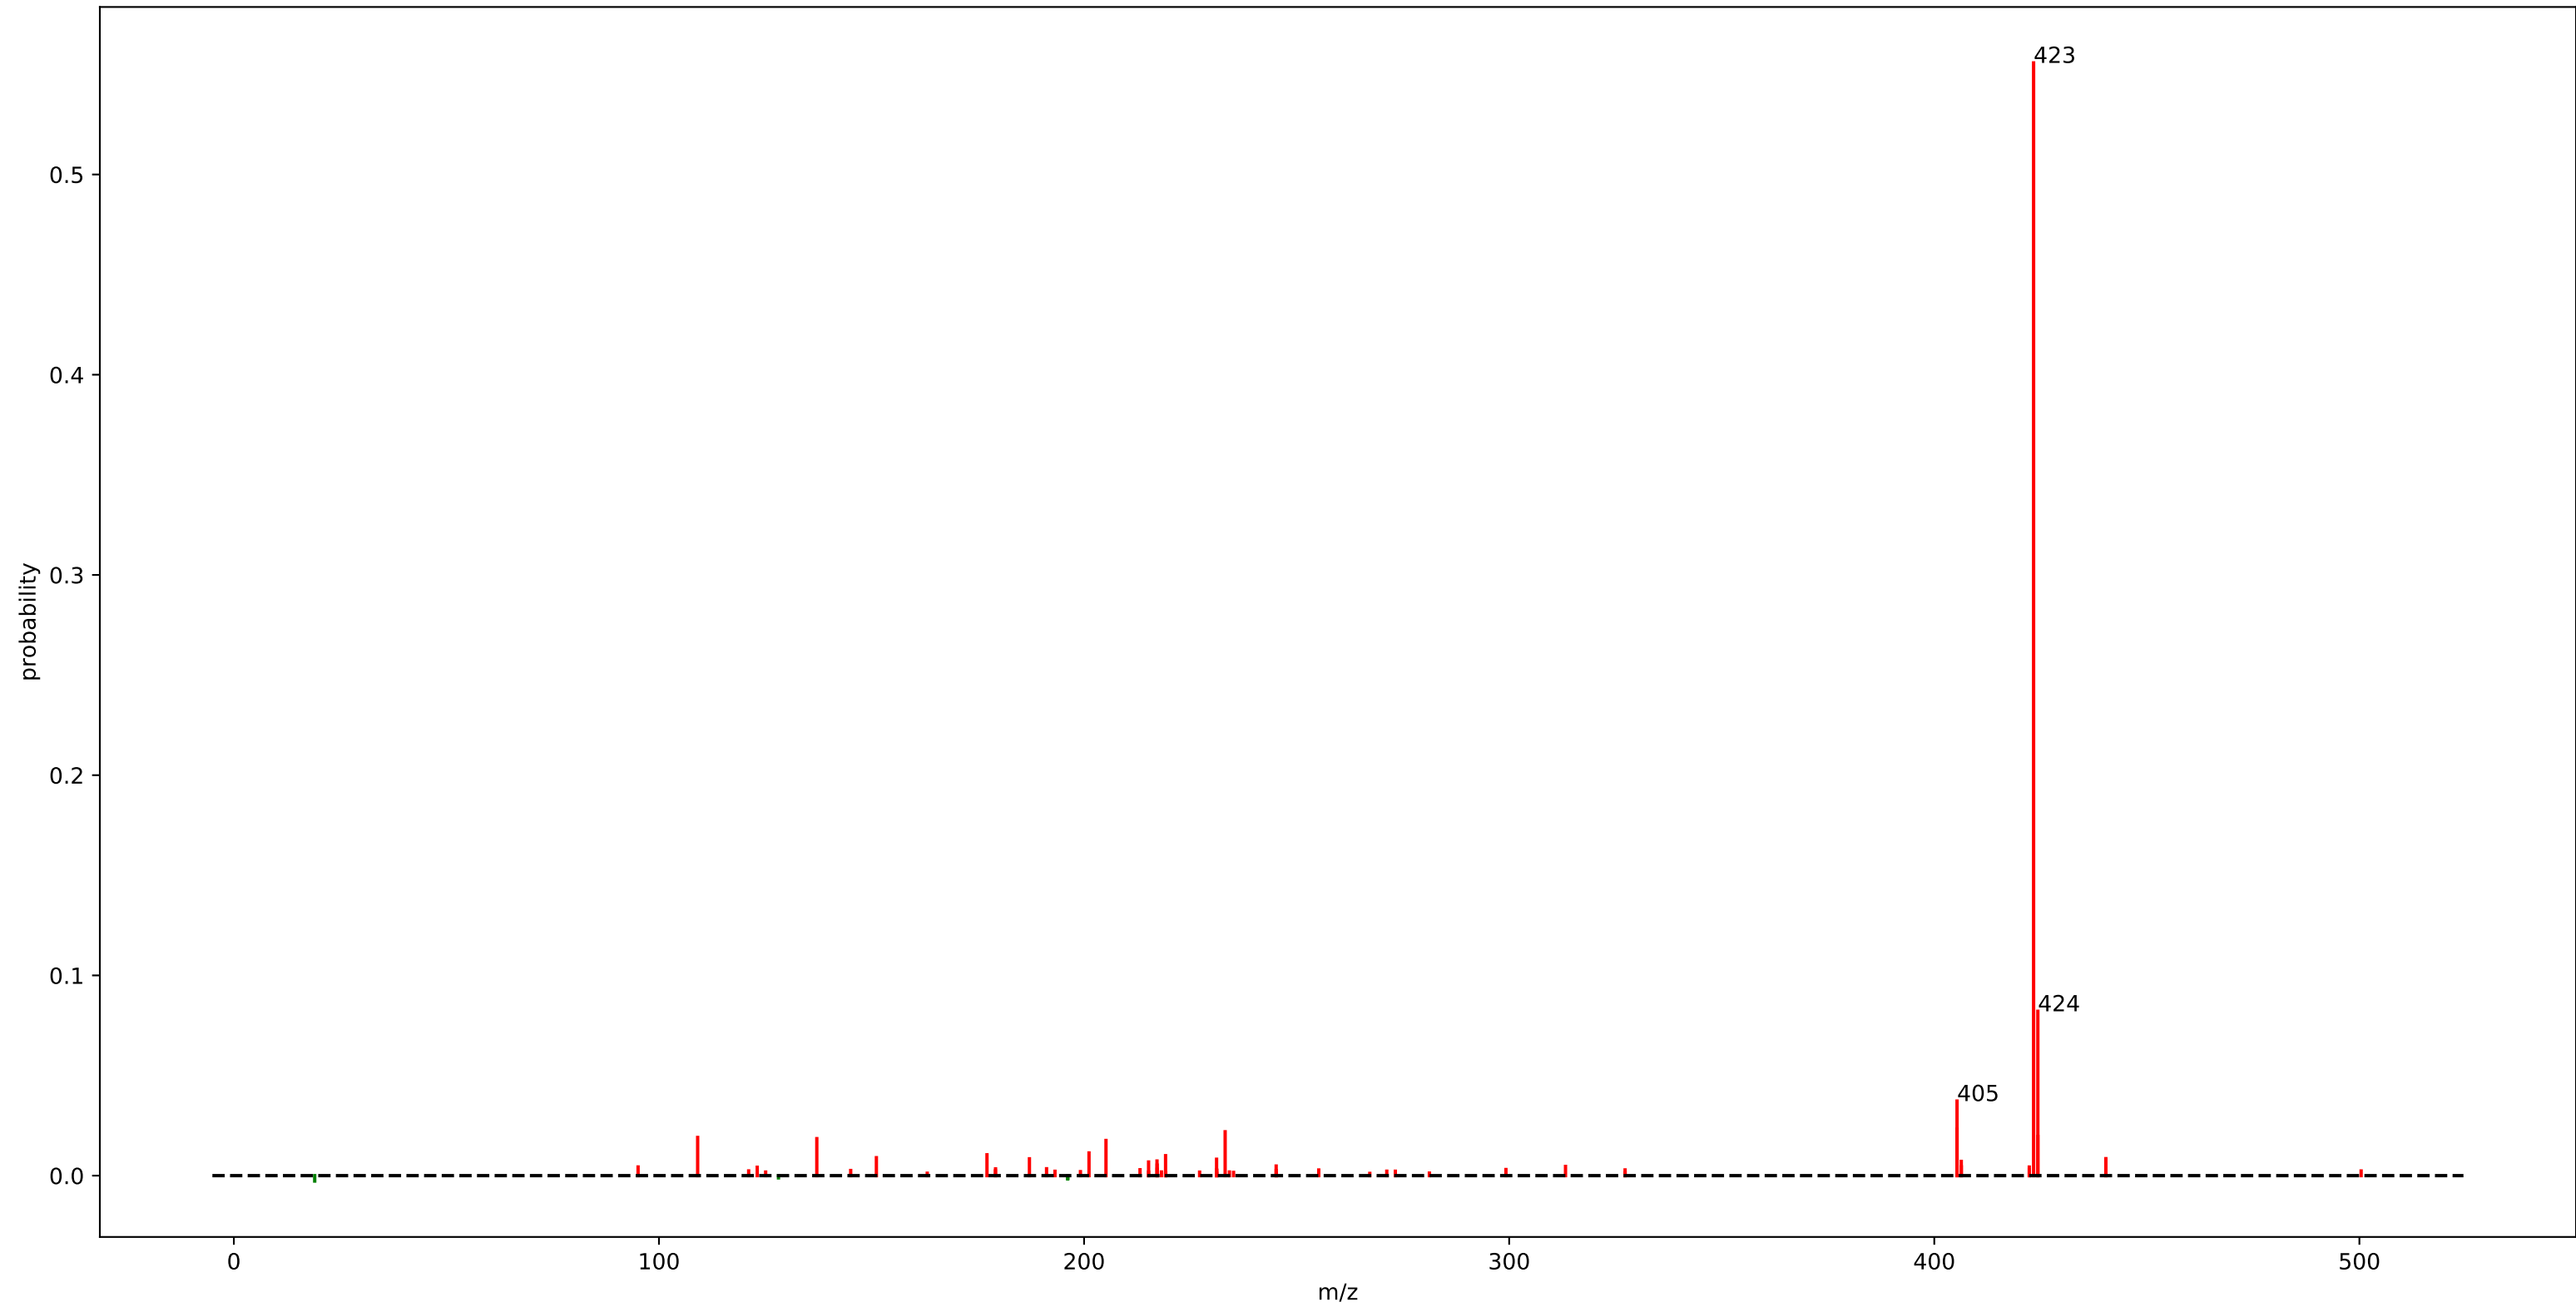

# euphorbia\_motif\_95.m2m

|                   |        |                   |        |
|-------------------|--------|-------------------|--------|
| fragment_423.3625 | : 0.56 | fragment_217.1925 | : 0.01 |
| fragment_424.3625 | : 0.08 |                   |        |
| fragment_405.3525 | : 0.04 |                   |        |
| fragment_405.3475 | : 0.02 |                   |        |
| fragment_233.1875 | : 0.02 |                   |        |
| fragment_424.3675 | : 0.02 |                   |        |
| fragment_109.1025 | : 0.02 |                   |        |
| fragment_137.1325 | : 0.02 |                   |        |
| fragment_205.1575 | : 0.02 |                   |        |
| fragment_201.1625 | : 0.01 |                   |        |
| fragment_177.1625 | : 0.01 |                   |        |
| fragment_219.1725 | : 0.01 |                   |        |
| fragment_151.1475 | : 0.01 |                   |        |
| fragment_440.3625 | : 0.01 |                   |        |
| fragment_187.1475 | : 0.01 |                   |        |
| fragment_231.1725 | : 0.01 |                   |        |
| fragment_440.3575 | : 0.01 |                   |        |
| fragment_217.1575 | : 0.01 |                   |        |
| fragment_406.3525 | : 0.01 |                   |        |
| fragment_215.1775 | : 0.01 |                   |        |

urine\_mass2motif\_207.m2m

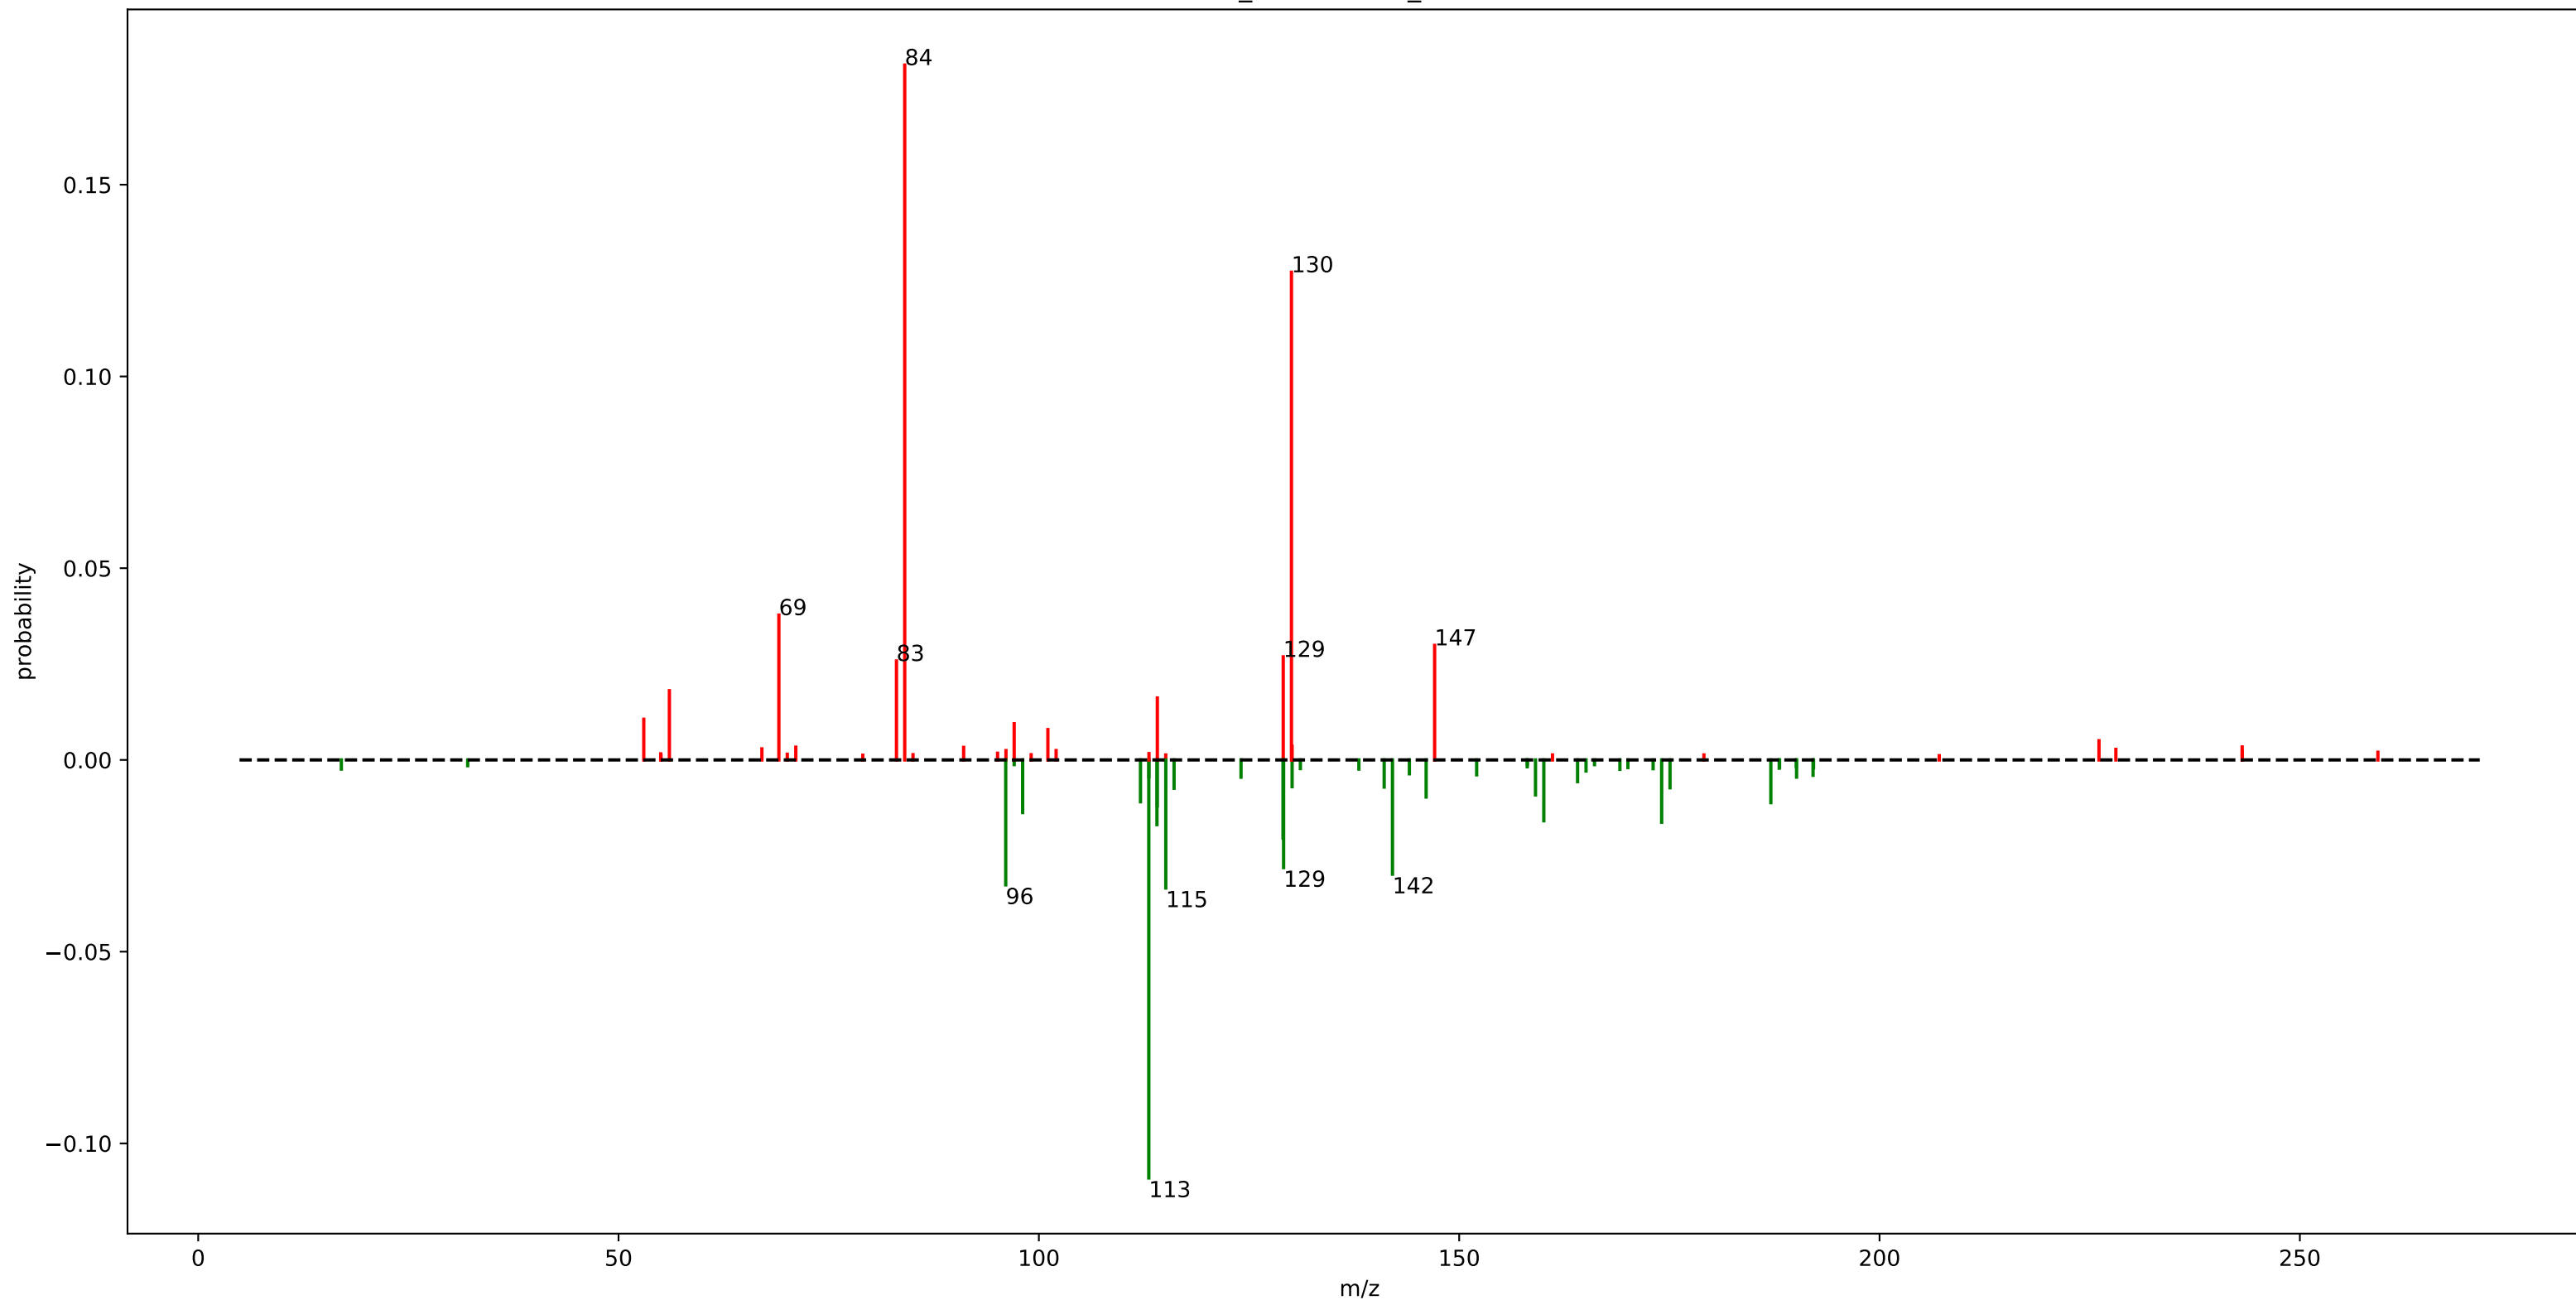

## urine\_mass2motif\_207.m2m

|                   |        |                   |        |
|-------------------|--------|-------------------|--------|
| fragment_84.0425  | : 0.18 | loss_112.0875     | : 0.01 |
| fragment_130.0475 | : 0.13 | fragment_53.0025  | : 0.01 |
| loss_113.0775     | : 0.11 | loss_146.0675     | : 0.01 |
| fragment_69.0725  | : 0.04 | fragment_97.0625  | : 0.01 |
| loss_115.0975     | : 0.03 | loss_159.0775     | : 0.01 |
| loss_96.0575      | : 0.03 | fragment_101.0725 | : 0.01 |
| fragment_147.0775 | : 0.03 | loss_116.0825     | : 0.01 |
| loss_142.0625     | : 0.03 | loss_175.0775     | : 0.01 |
| loss_129.1125     | : 0.03 | loss_141.0775     | : 0.01 |
| fragment_129.0675 | : 0.03 | loss_130.1225     | : 0.01 |
| fragment_83.0625  | : 0.03 | loss_164.0825     | : 0.01 |
| loss_129.0425     | : 0.02 |                   |        |
| fragment_56.0475  | : 0.02 |                   |        |
| loss_114.0475     | : 0.02 |                   |        |
| loss_174.0825     | : 0.02 |                   |        |
| fragment_114.0925 | : 0.02 |                   |        |
| loss_160.0675     | : 0.02 |                   |        |
| loss_98.0725      | : 0.01 |                   |        |
| loss_114.0825     | : 0.01 |                   |        |
| loss_187.0725     | : 0.01 |                   |        |

gnps\_motif\_33.m2m

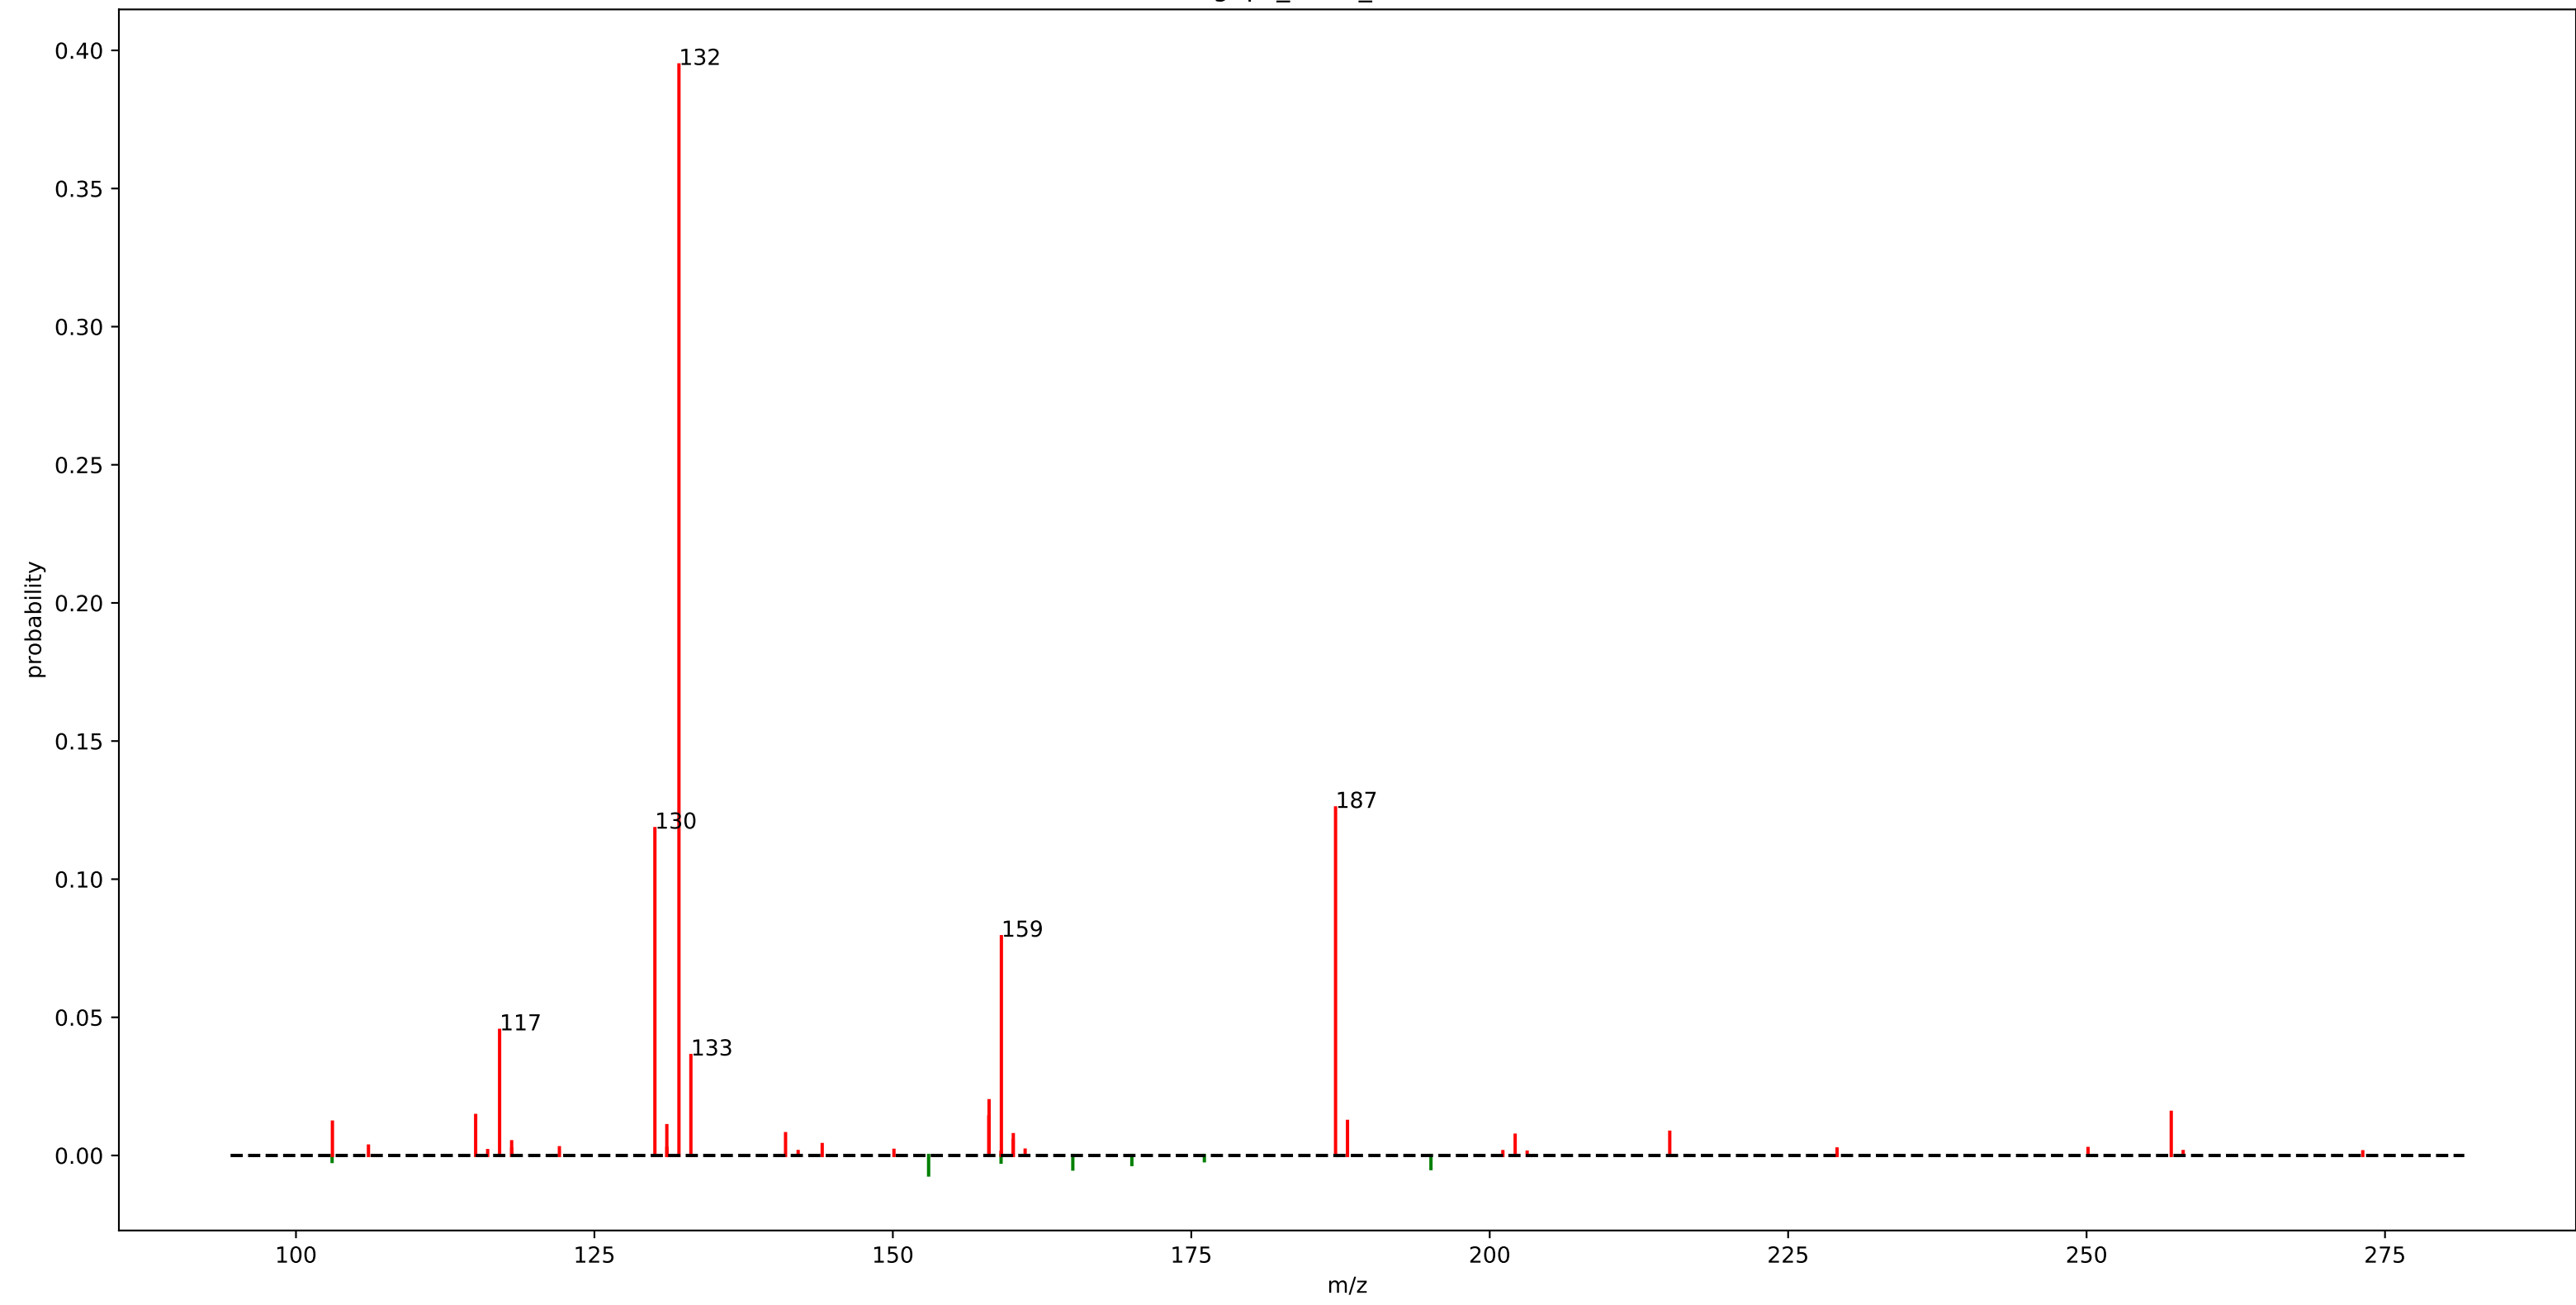

## gnps\_motif\_33.m2m

|                   |        |
|-------------------|--------|
| fragment_132.0825 | : 0.39 |
| fragment_187.0875 | : 0.13 |
| fragment_130.0675 | : 0.12 |
| fragment_159.0925 | : 0.08 |
| fragment_117.0575 | : 0.05 |
| fragment_133.0825 | : 0.04 |
| fragment_158.0625 | : 0.02 |
| fragment_257.0925 | : 0.02 |
| fragment_115.0525 | : 0.01 |
| fragment_158.0375 | : 0.01 |
| fragment_188.0875 | : 0.01 |
| fragment_103.0525 | : 0.01 |
| fragment_131.0675 | : 0.01 |
| fragment_215.0825 | : 0.01 |
| fragment_141.0125 | : 0.01 |
| fragment_160.0925 | : 0.01 |
| fragment_202.1325 | : 0.01 |
| loss_152.9975     | : 0.01 |
| fragment_160.0775 | : 0.01 |

mb\_motif\_29.m2m

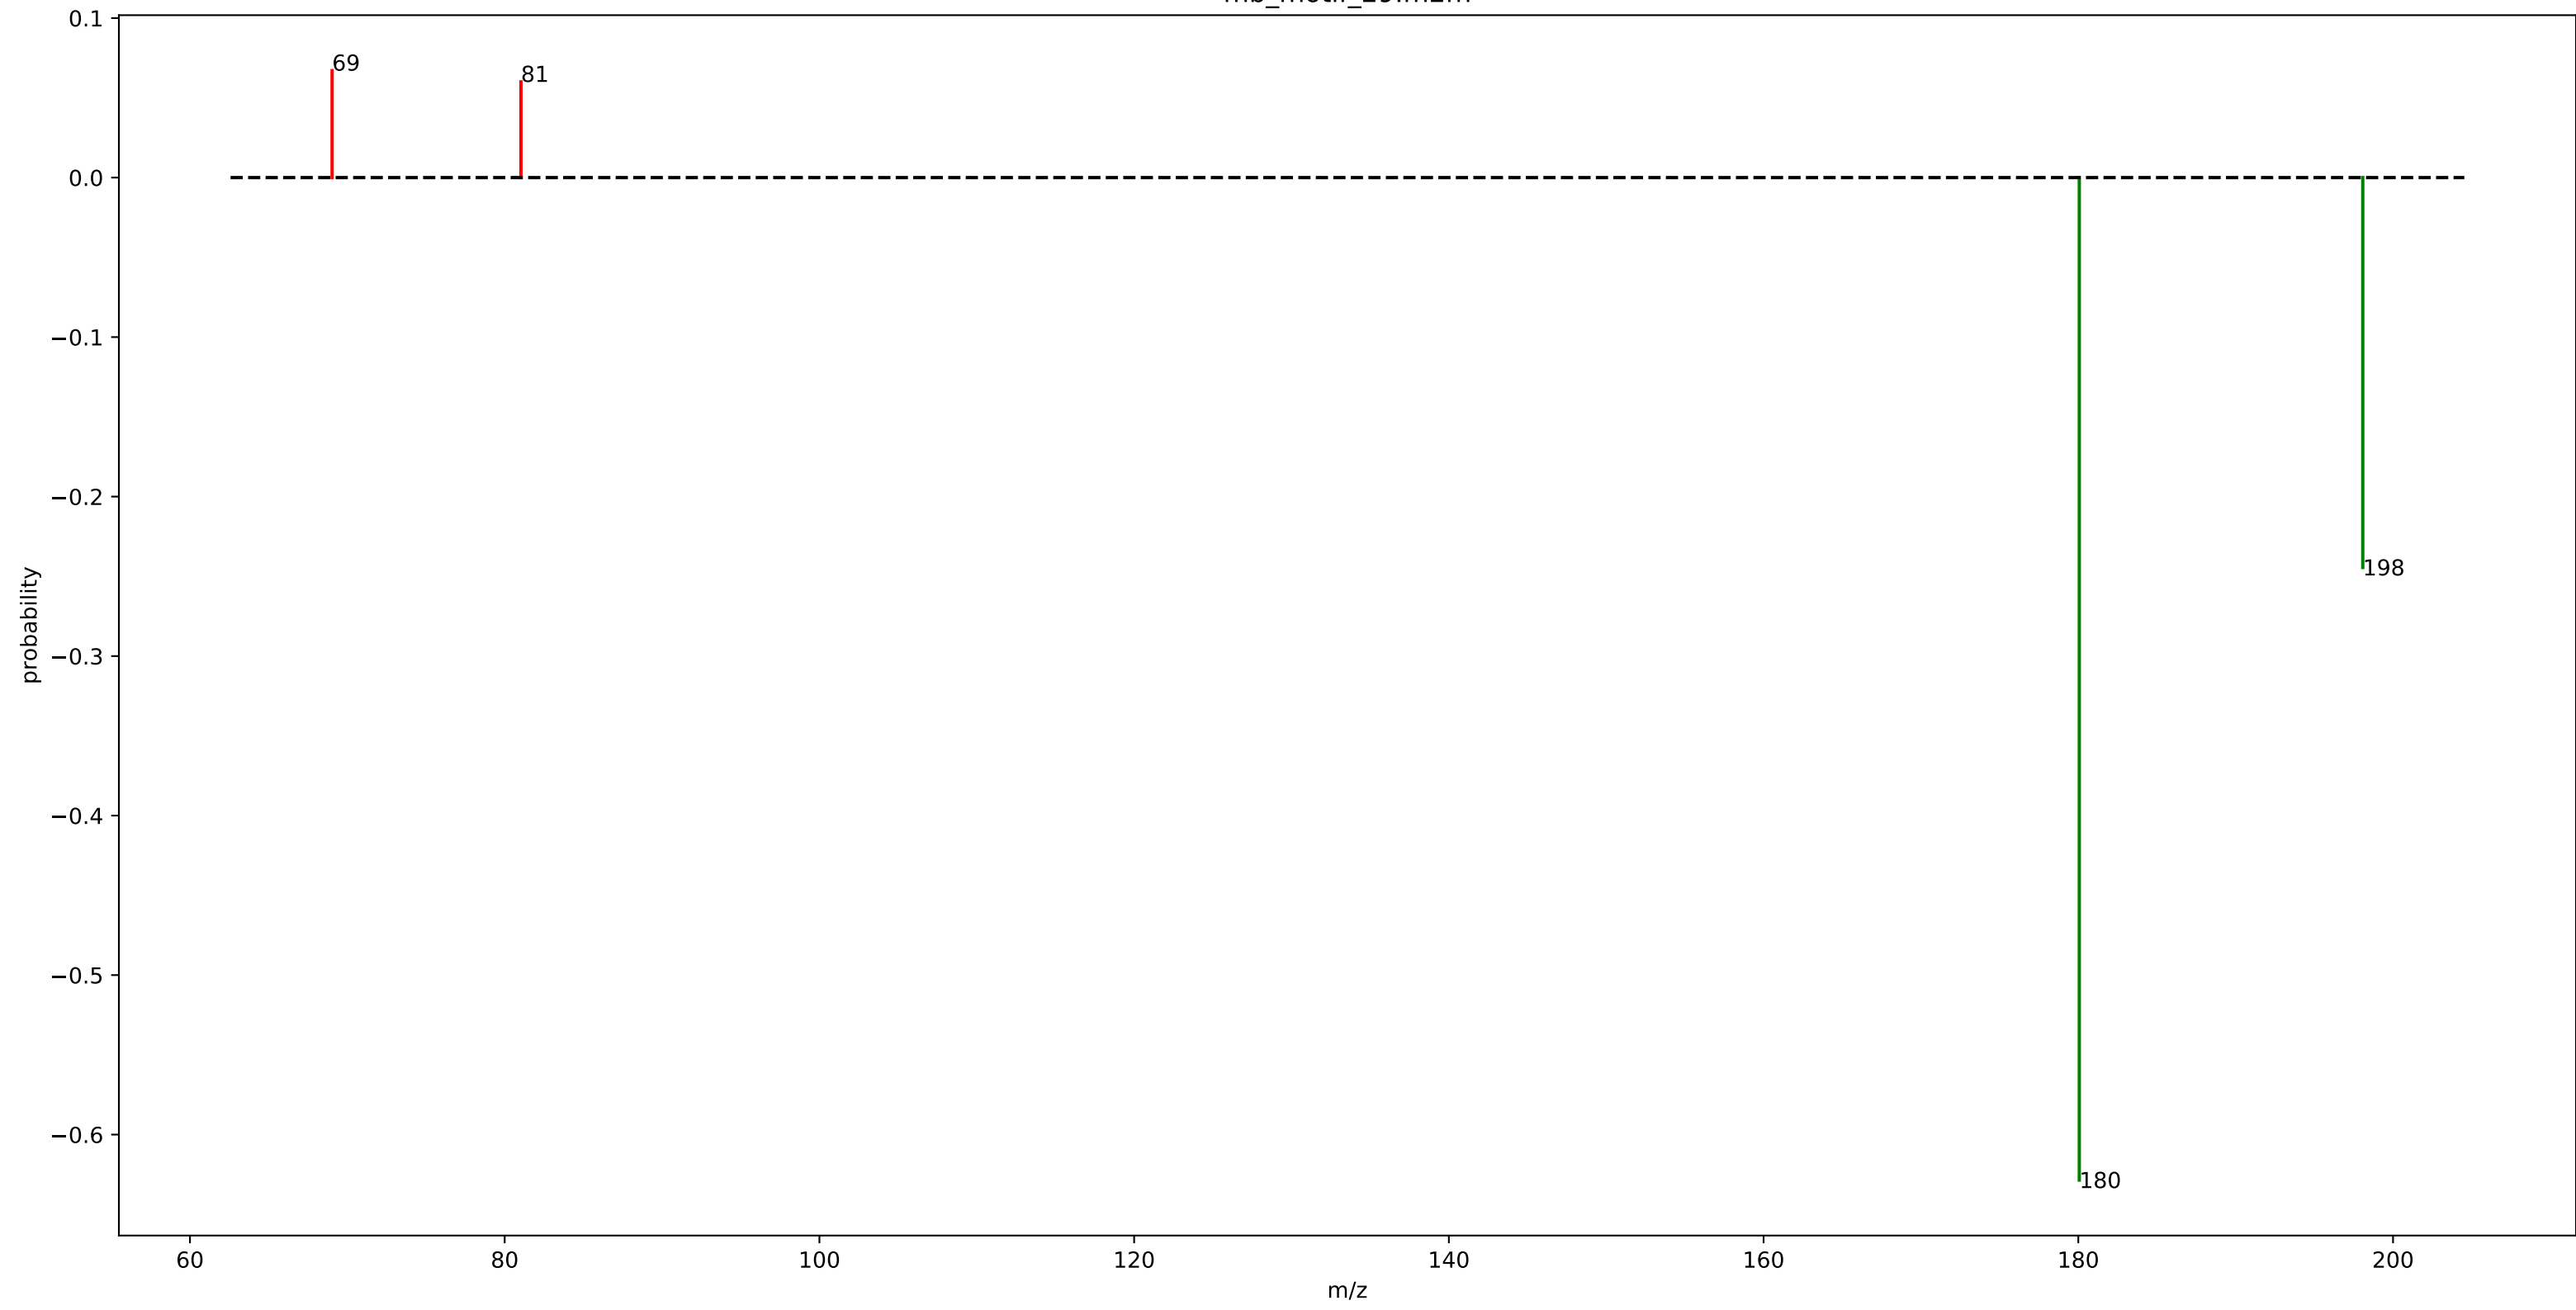

## mb\_motif\_29.m2m

|                  |        |
|------------------|--------|
| loss_180.0625    | : 0.63 |
| loss_198.0775    | : 0.24 |
| fragment_69.0325 | : 0.07 |
| fragment_81.0325 | : 0.06 |



urine\_mass2motif\_94.m2m

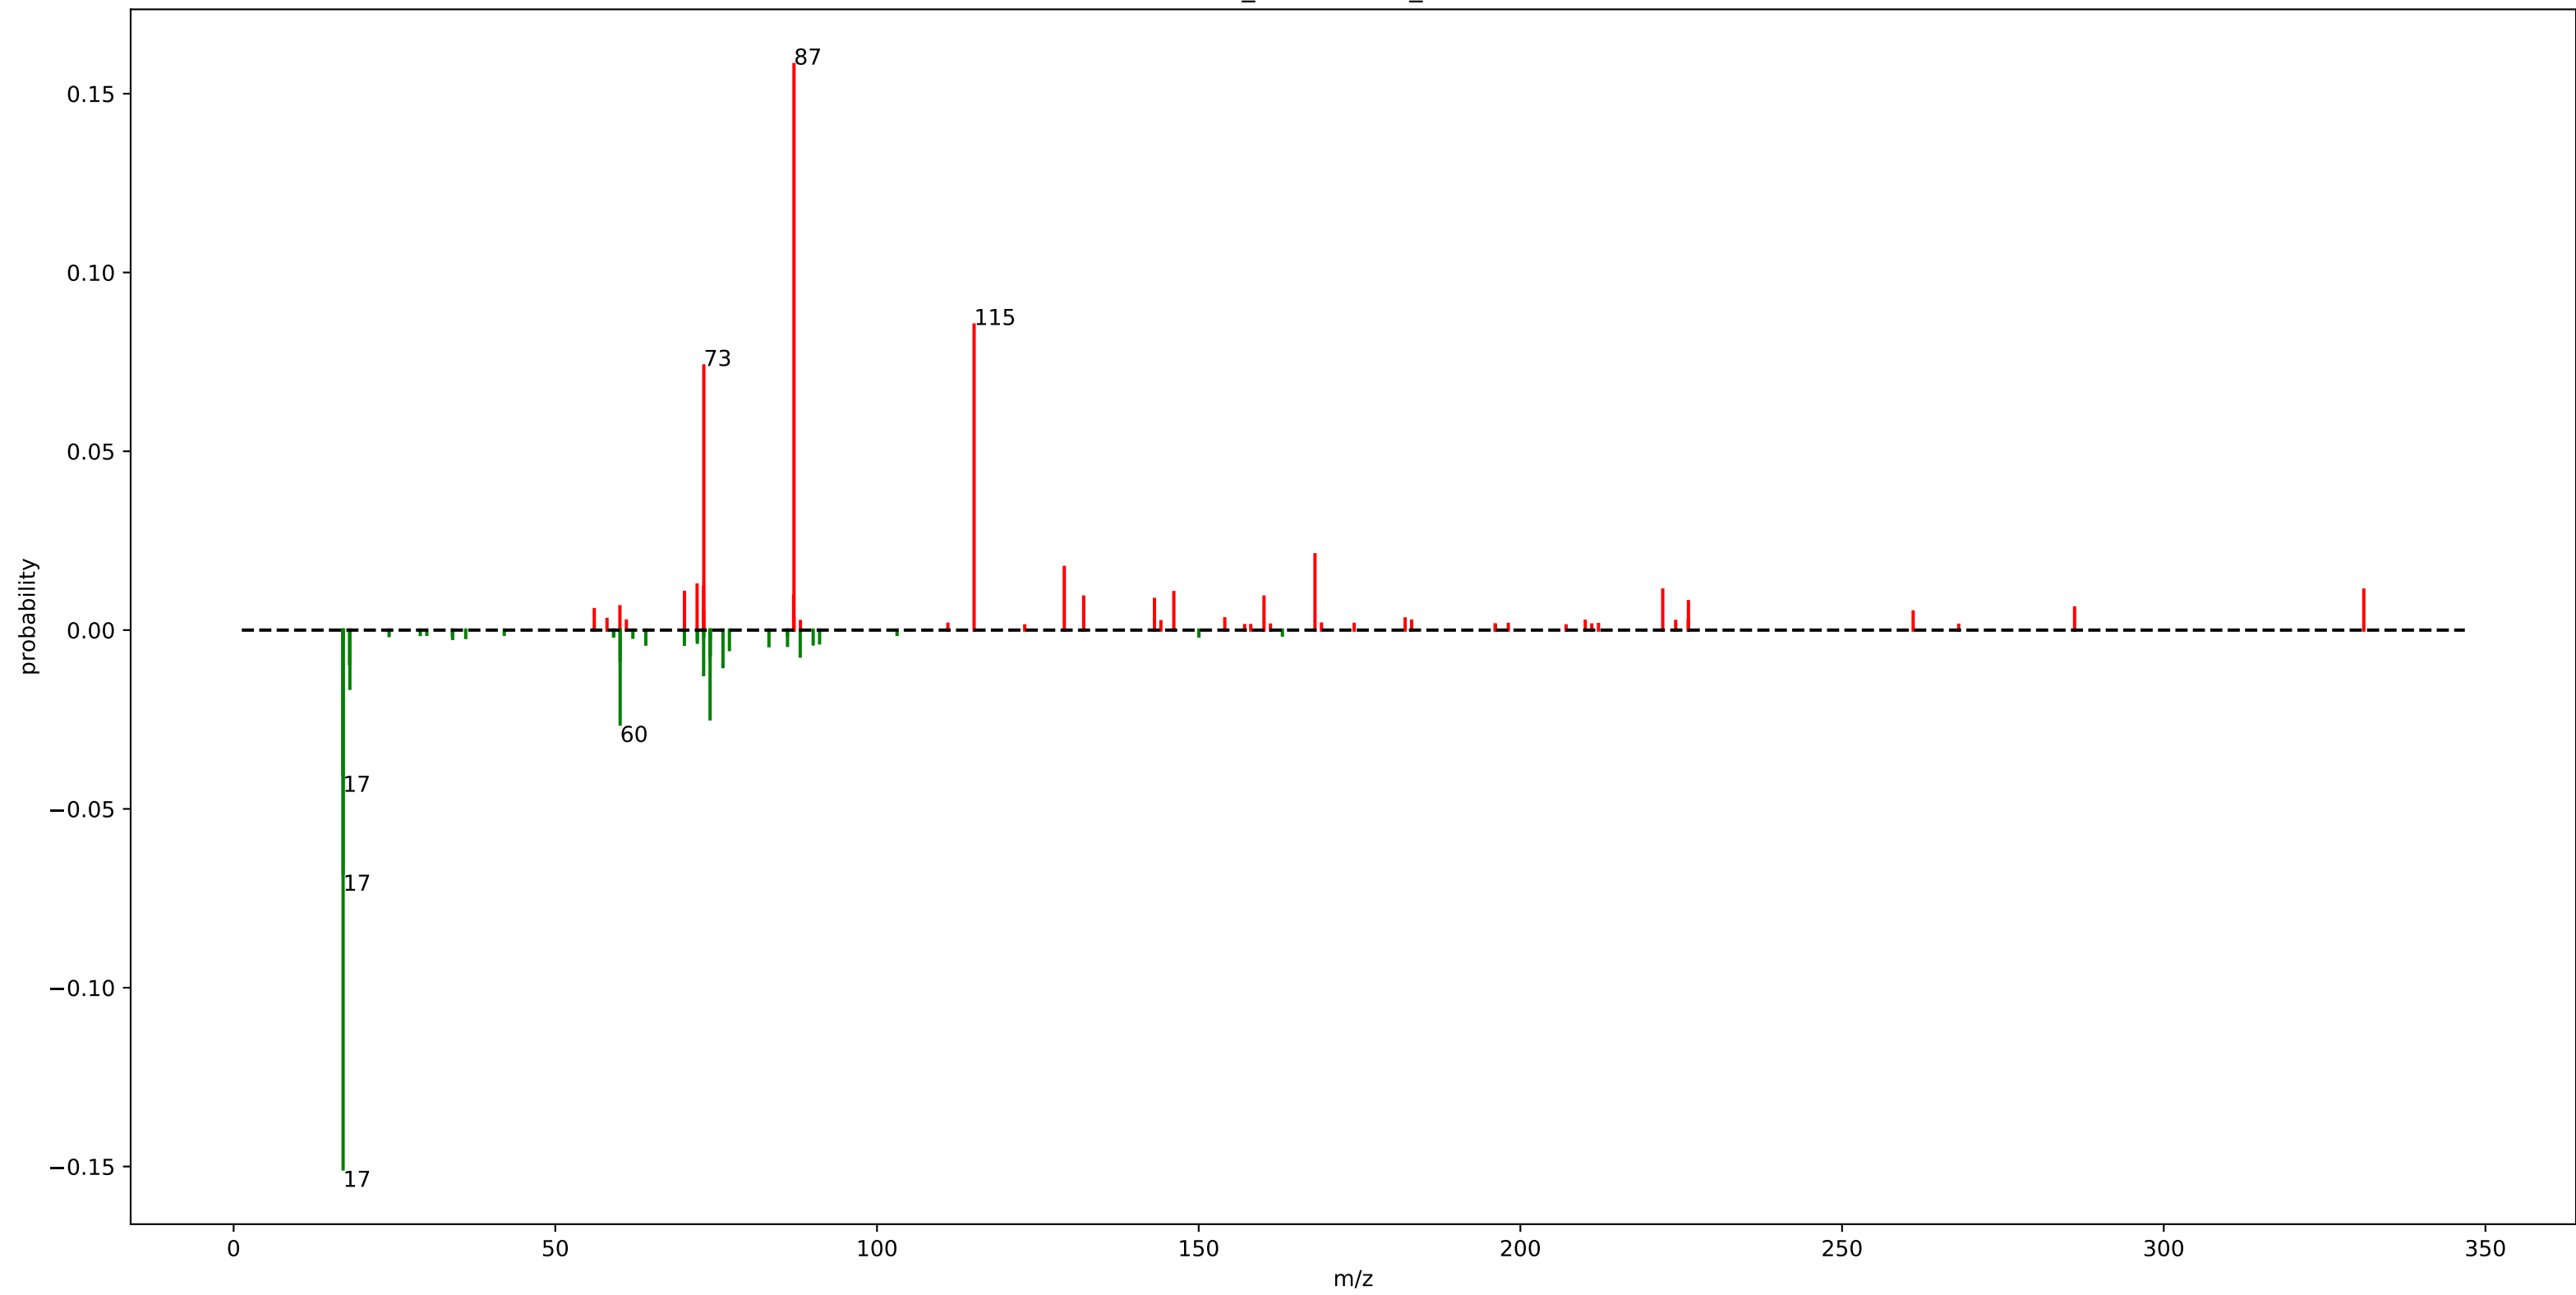

# urine\_mass2motif\_94.m2m

|                   |        |                   |        |
|-------------------|--------|-------------------|--------|
| fragment_87.0975  | : 0.16 | loss_18.0225      | : 0.01 |
| loss_17.0175      | : 0.15 | fragment_132.1225 | : 0.01 |
| fragment_115.0925 | : 0.09 | fragment_160.1525 | : 0.01 |
| fragment_73.0825  | : 0.07 | fragment_143.1275 | : 0.01 |
| loss_17.0225      | : 0.07 | loss_60.0675      | : 0.01 |
| loss_16.9775      | : 0.04 | fragment_226.1225 | : 0.01 |
| loss_60.0775      | : 0.03 | loss_74.0475      | : 0.01 |
| loss_74.0575      | : 0.02 | loss_88.0675      | : 0.01 |
| fragment_168.0775 | : 0.02 | loss_74.0925      | : 0.01 |
| fragment_129.1125 | : 0.02 | fragment_60.0425  | : 0.01 |
| loss_18.0675      | : 0.02 | fragment_286.1425 | : 0.01 |
| fragment_72.0425  | : 0.01 | fragment_56.0575  | : 0.01 |
| loss_73.0525      | : 0.01 | loss_77.0625      | : 0.01 |
| fragment_73.0475  | : 0.01 | fragment_73.0775  | : 0.01 |
| fragment_222.1275 | : 0.01 | fragment_261.0525 | : 0.01 |
| fragment_331.0925 | : 0.01 |                   |        |
| fragment_70.0725  | : 0.01 |                   |        |
| fragment_146.1375 | : 0.01 |                   |        |
| loss_76.0625      | : 0.01 |                   |        |
| fragment_87.0425  | : 0.01 |                   |        |

urine\_mass2motif\_133.m2m

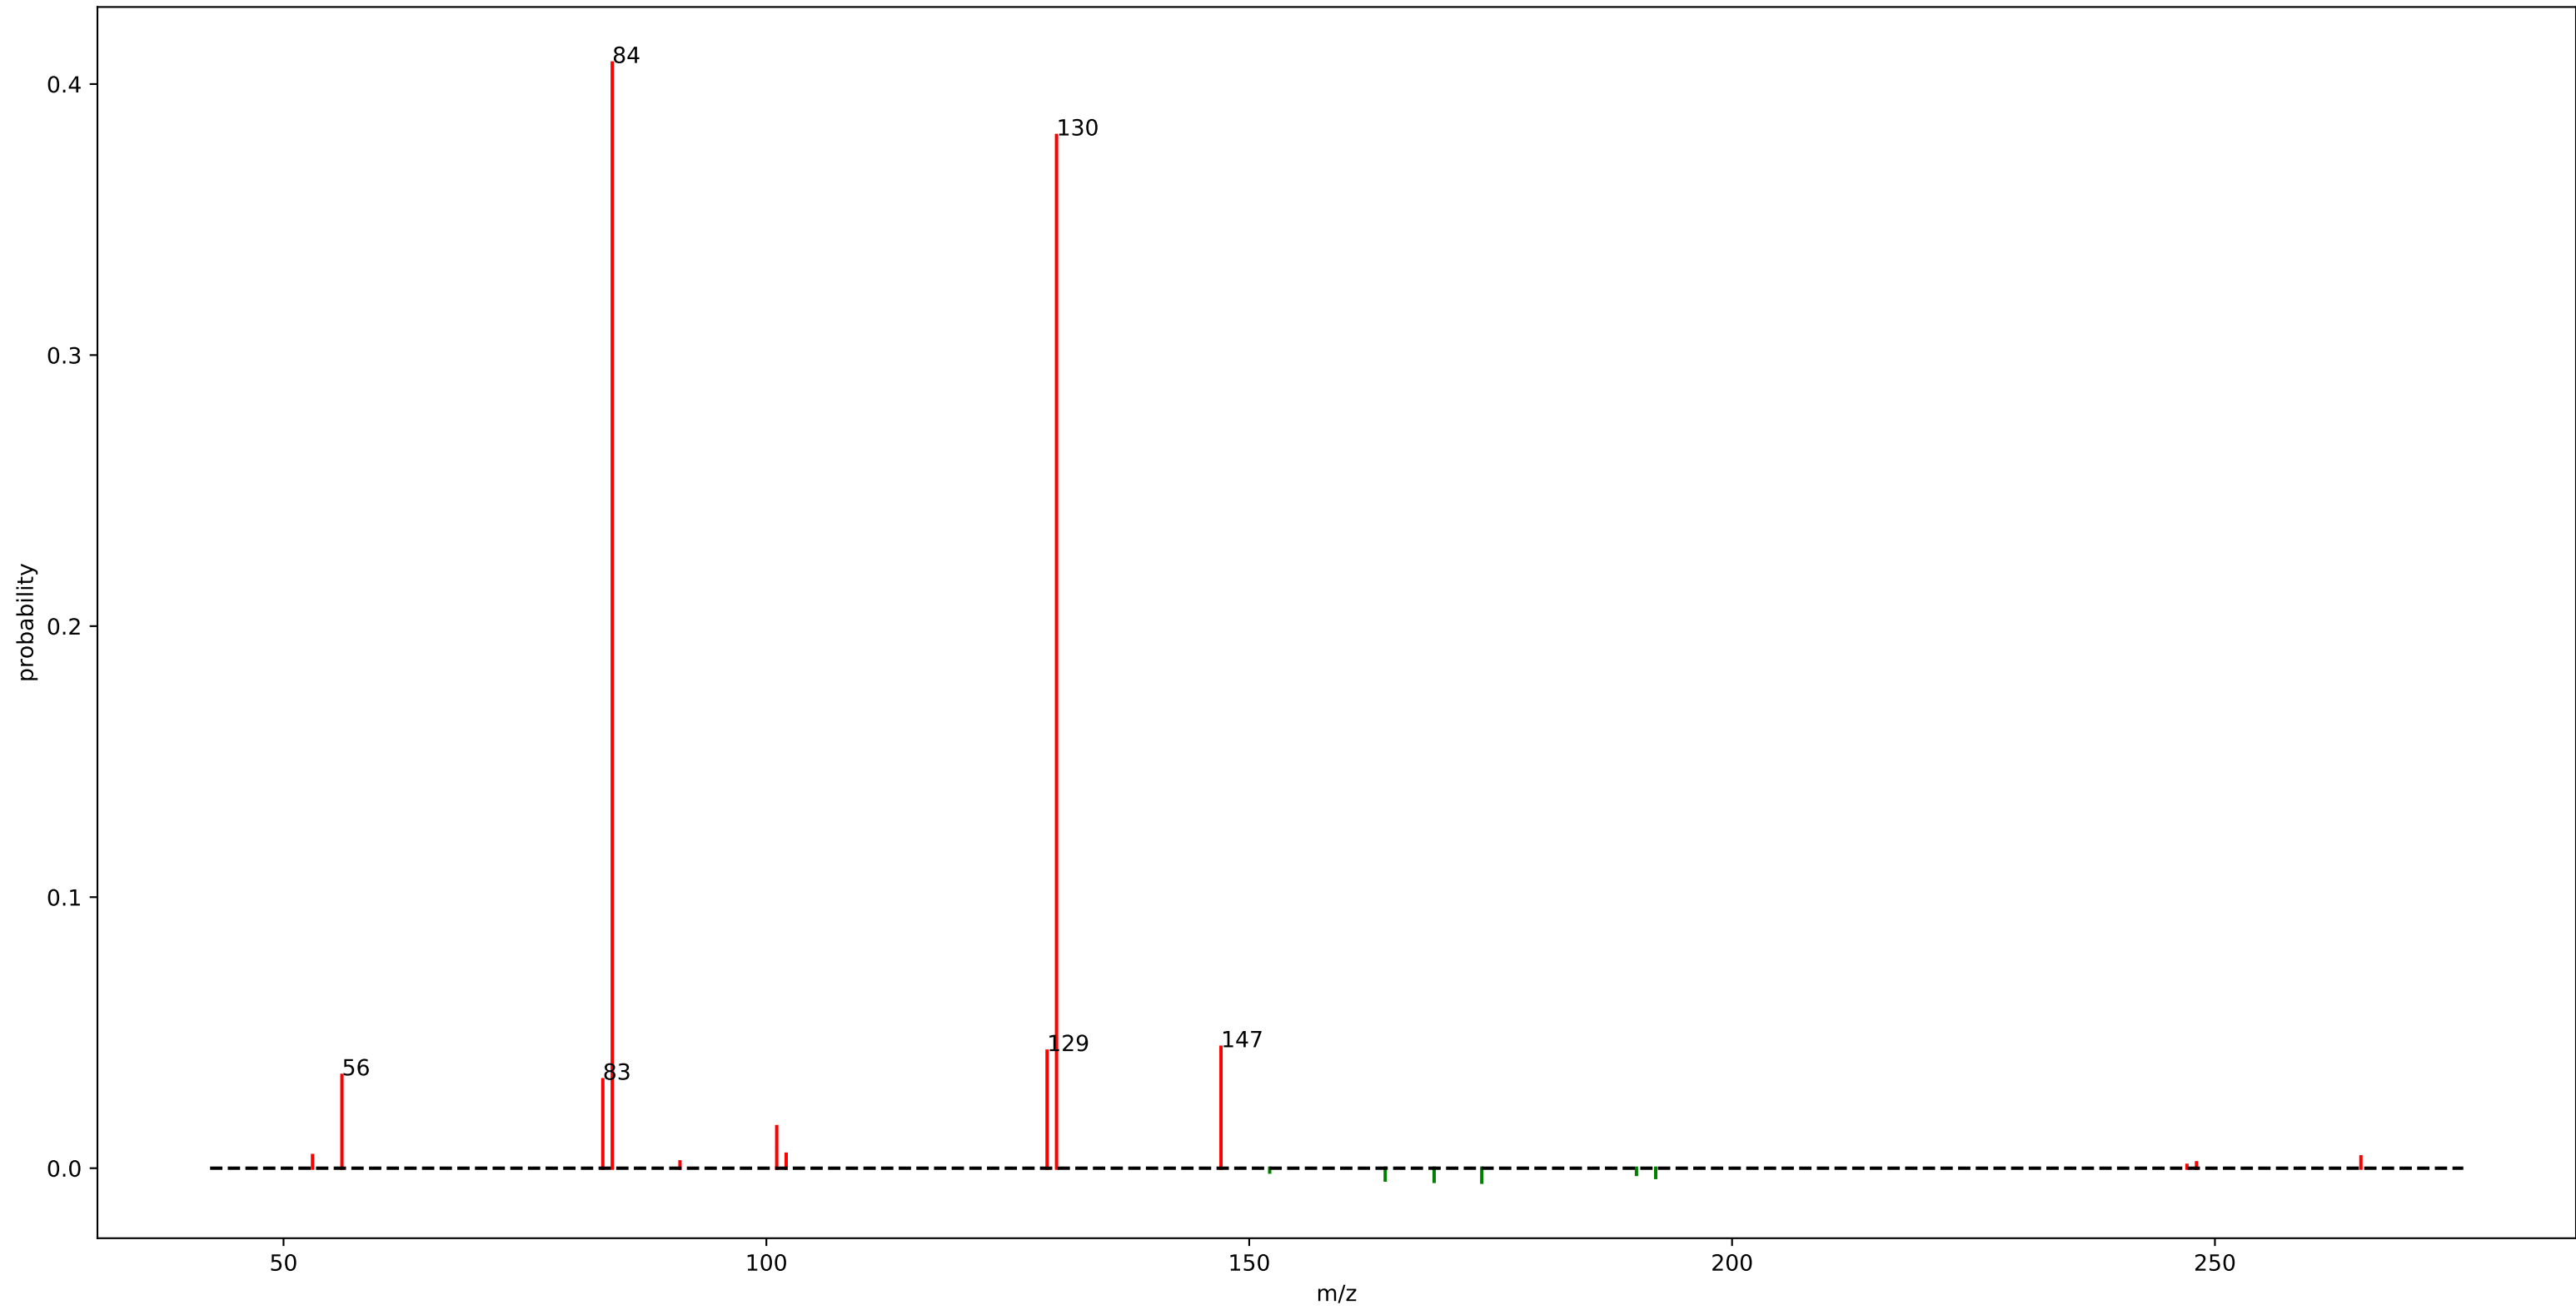

## urine\_mass2motif\_133.m2m

|                   |        |
|-------------------|--------|
| fragment_84.0425  | : 0.41 |
| fragment_130.0475 | : 0.38 |
| fragment_147.0775 | : 0.04 |
| fragment_129.0675 | : 0.04 |
| fragment_56.0475  | : 0.03 |
| fragment_83.0625  | : 0.03 |
| fragment_101.0725 | : 0.02 |
| loss_174.0825     | : 0.01 |
| fragment_102.0525 | : 0.01 |

euphorbia\_motif\_341.m2m

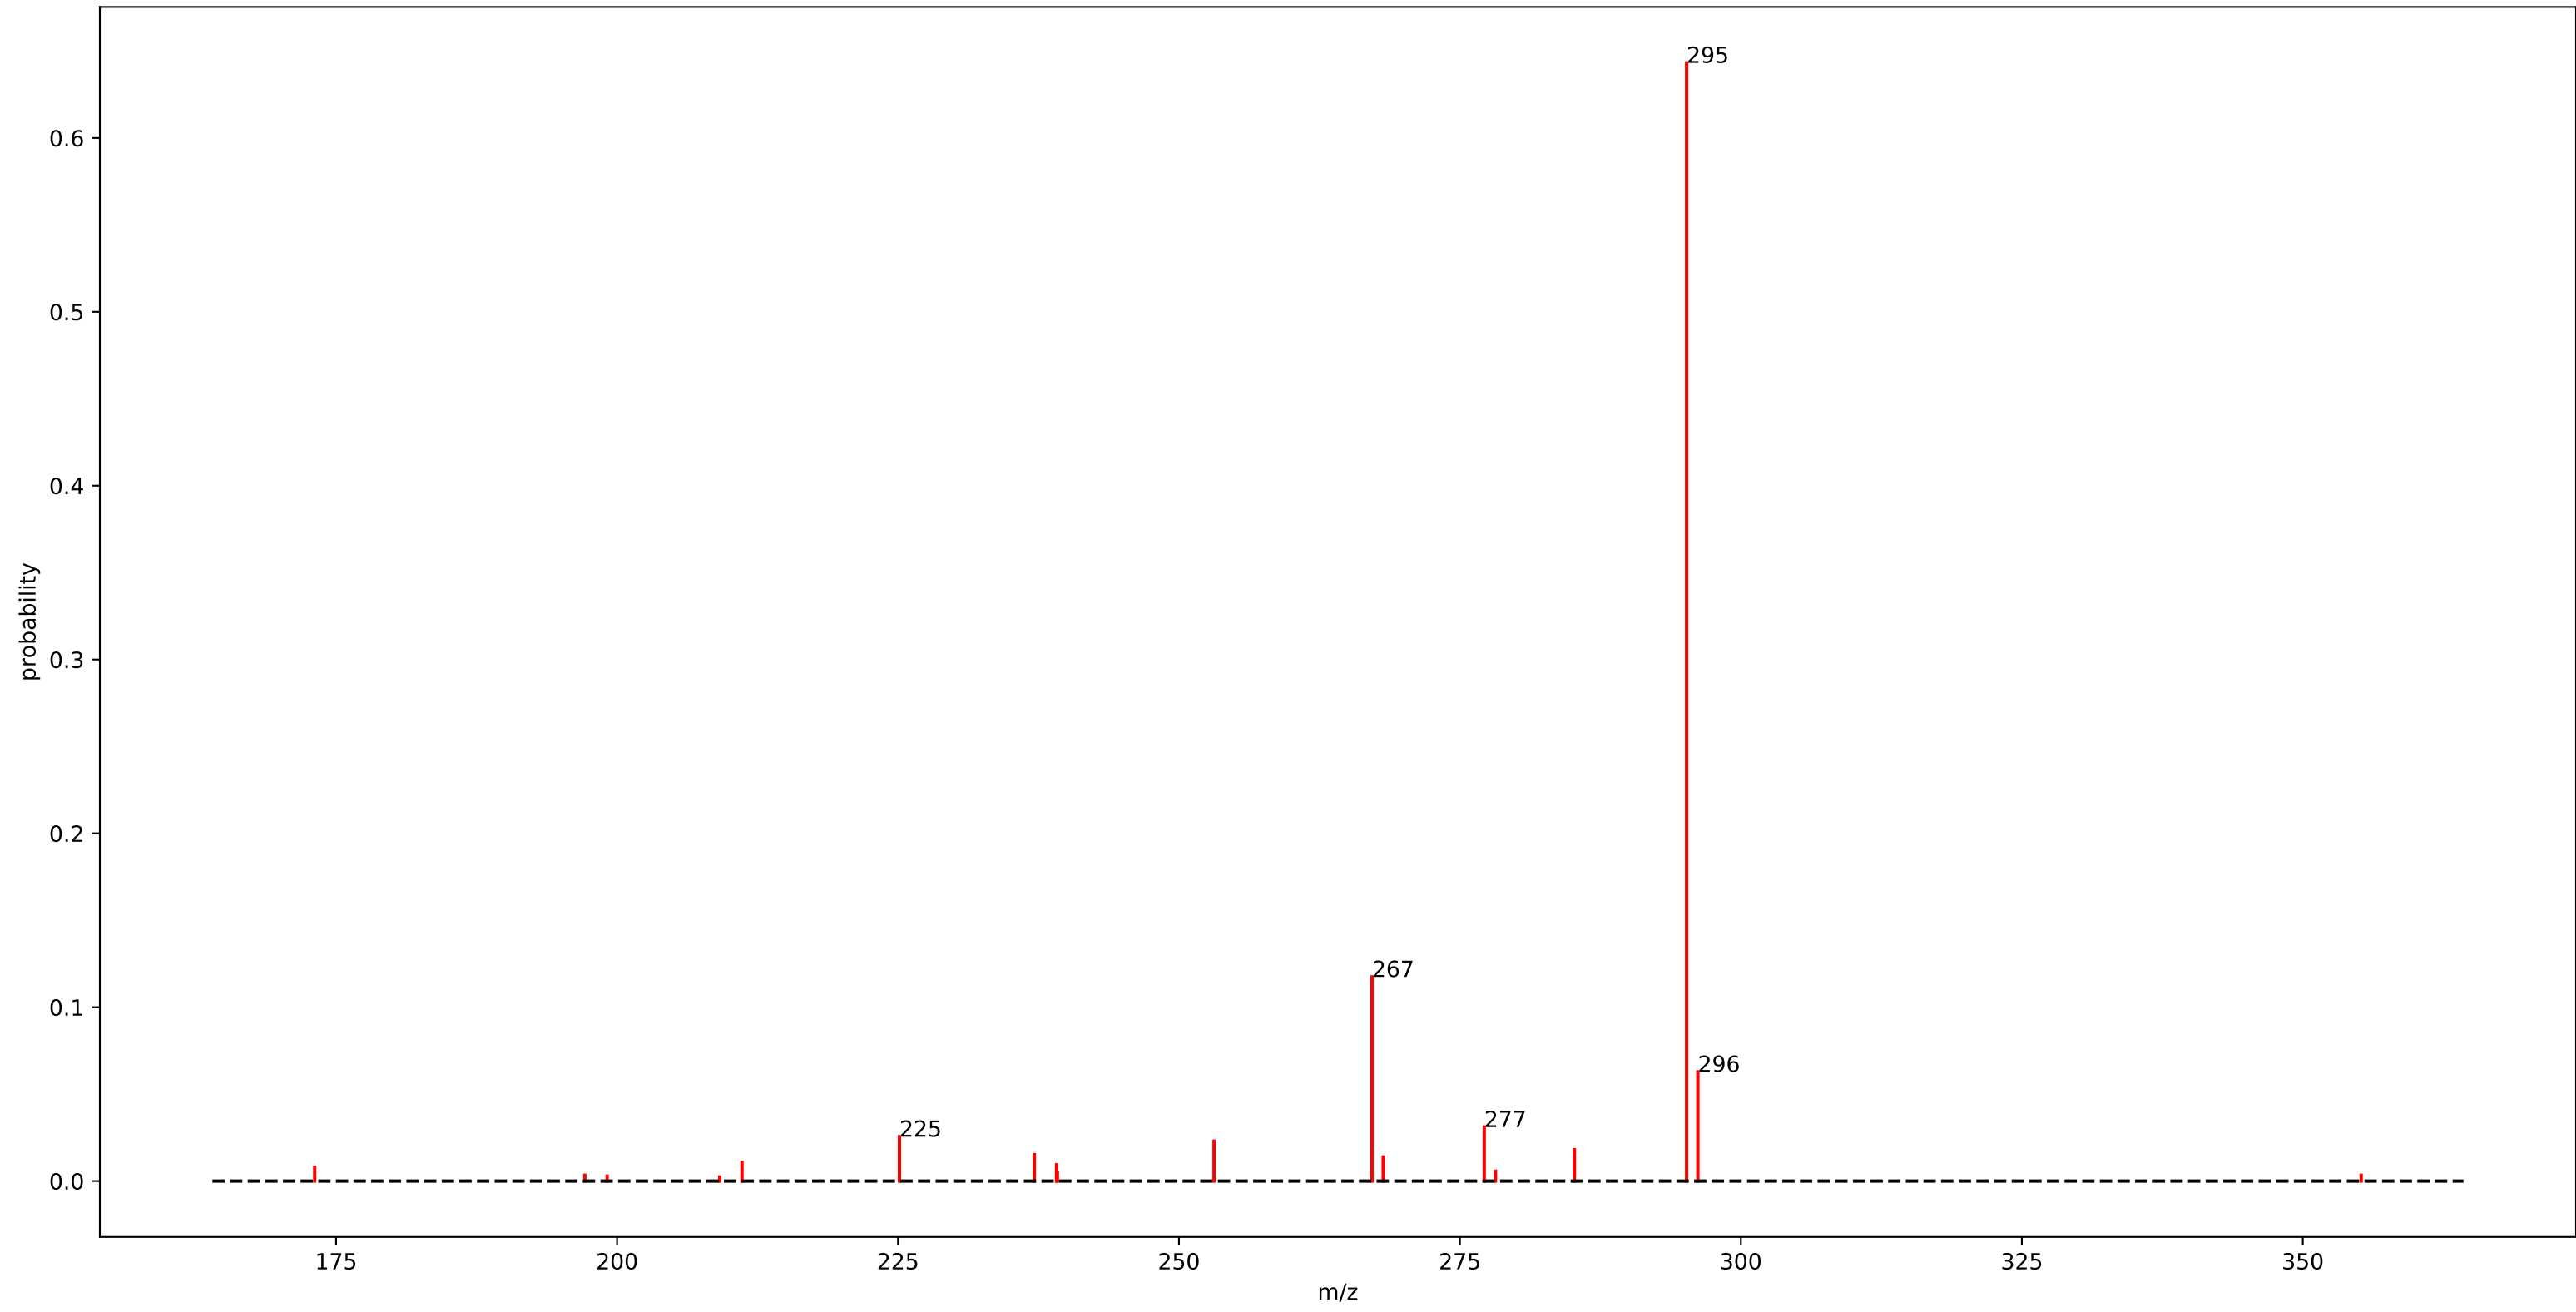

## euphorbia\_motif\_341.m2m

|                   |        |
|-------------------|--------|
| fragment_295.1725 | : 0.64 |
| fragment_267.1775 | : 0.12 |
| fragment_296.1725 | : 0.06 |
| fragment_277.1625 | : 0.03 |
| fragment_225.1275 | : 0.03 |
| fragment_253.1225 | : 0.02 |
| fragment_285.1875 | : 0.02 |
| fragment_237.1275 | : 0.02 |
| fragment_268.1775 | : 0.01 |
| fragment_211.1125 | : 0.01 |
| fragment_239.1075 | : 0.01 |
| fragment_173.0975 | : 0.01 |
| fragment_278.1625 | : 0.01 |

StrepSalini\_motif\_128.m2m

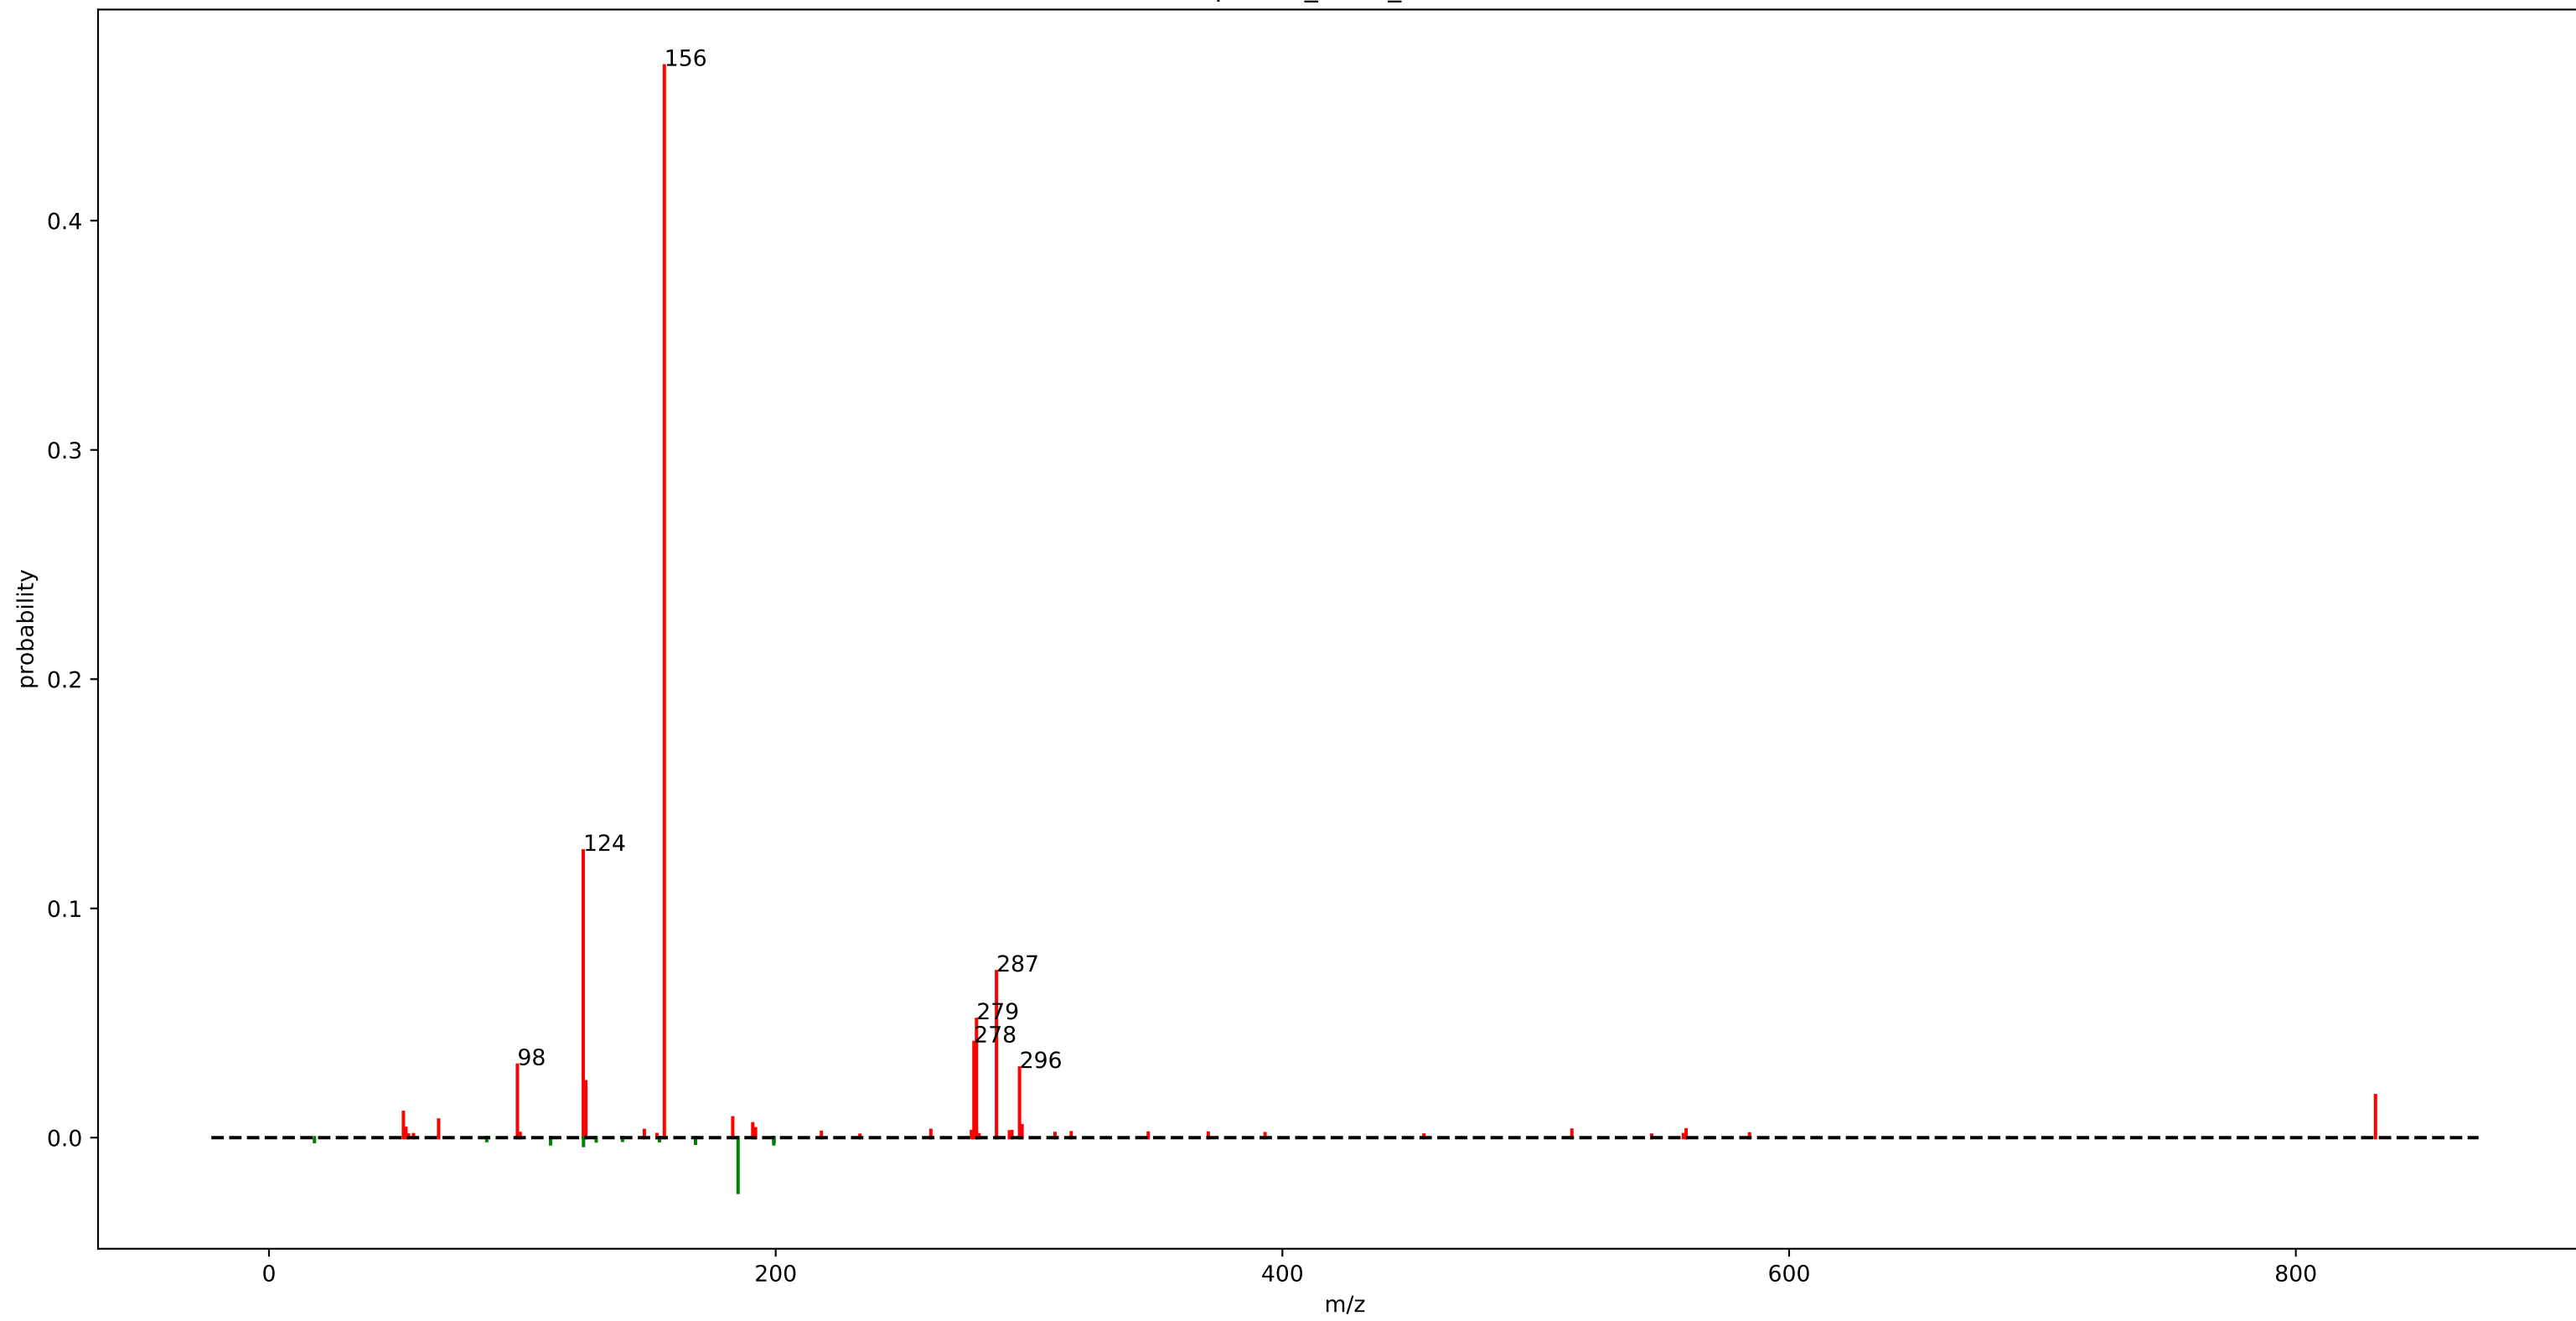

## StrepSalini\_motif\_128.m2m

|                   |        |
|-------------------|--------|
| fragment_156.0500 | : 0.47 |
| fragment_124.0500 | : 0.13 |
| fragment_287.1500 | : 0.07 |
| fragment_279.2525 | : 0.05 |
| fragment_278.2500 | : 0.04 |
| fragment_98.0500  | : 0.03 |
| fragment_296.2500 | : 0.03 |
| fragment_125.0500 | : 0.02 |
| loss_185.1500     | : 0.02 |
| fragment_831.4500 | : 0.02 |
| fragment_53.0500  | : 0.01 |
| fragment_183.0500 | : 0.01 |
| fragment_66.9500  | : 0.01 |
| fragment_190.9500 | : 0.01 |
| fragment_297.2500 | : 0.01 |



gnps\_motif\_27.m2m

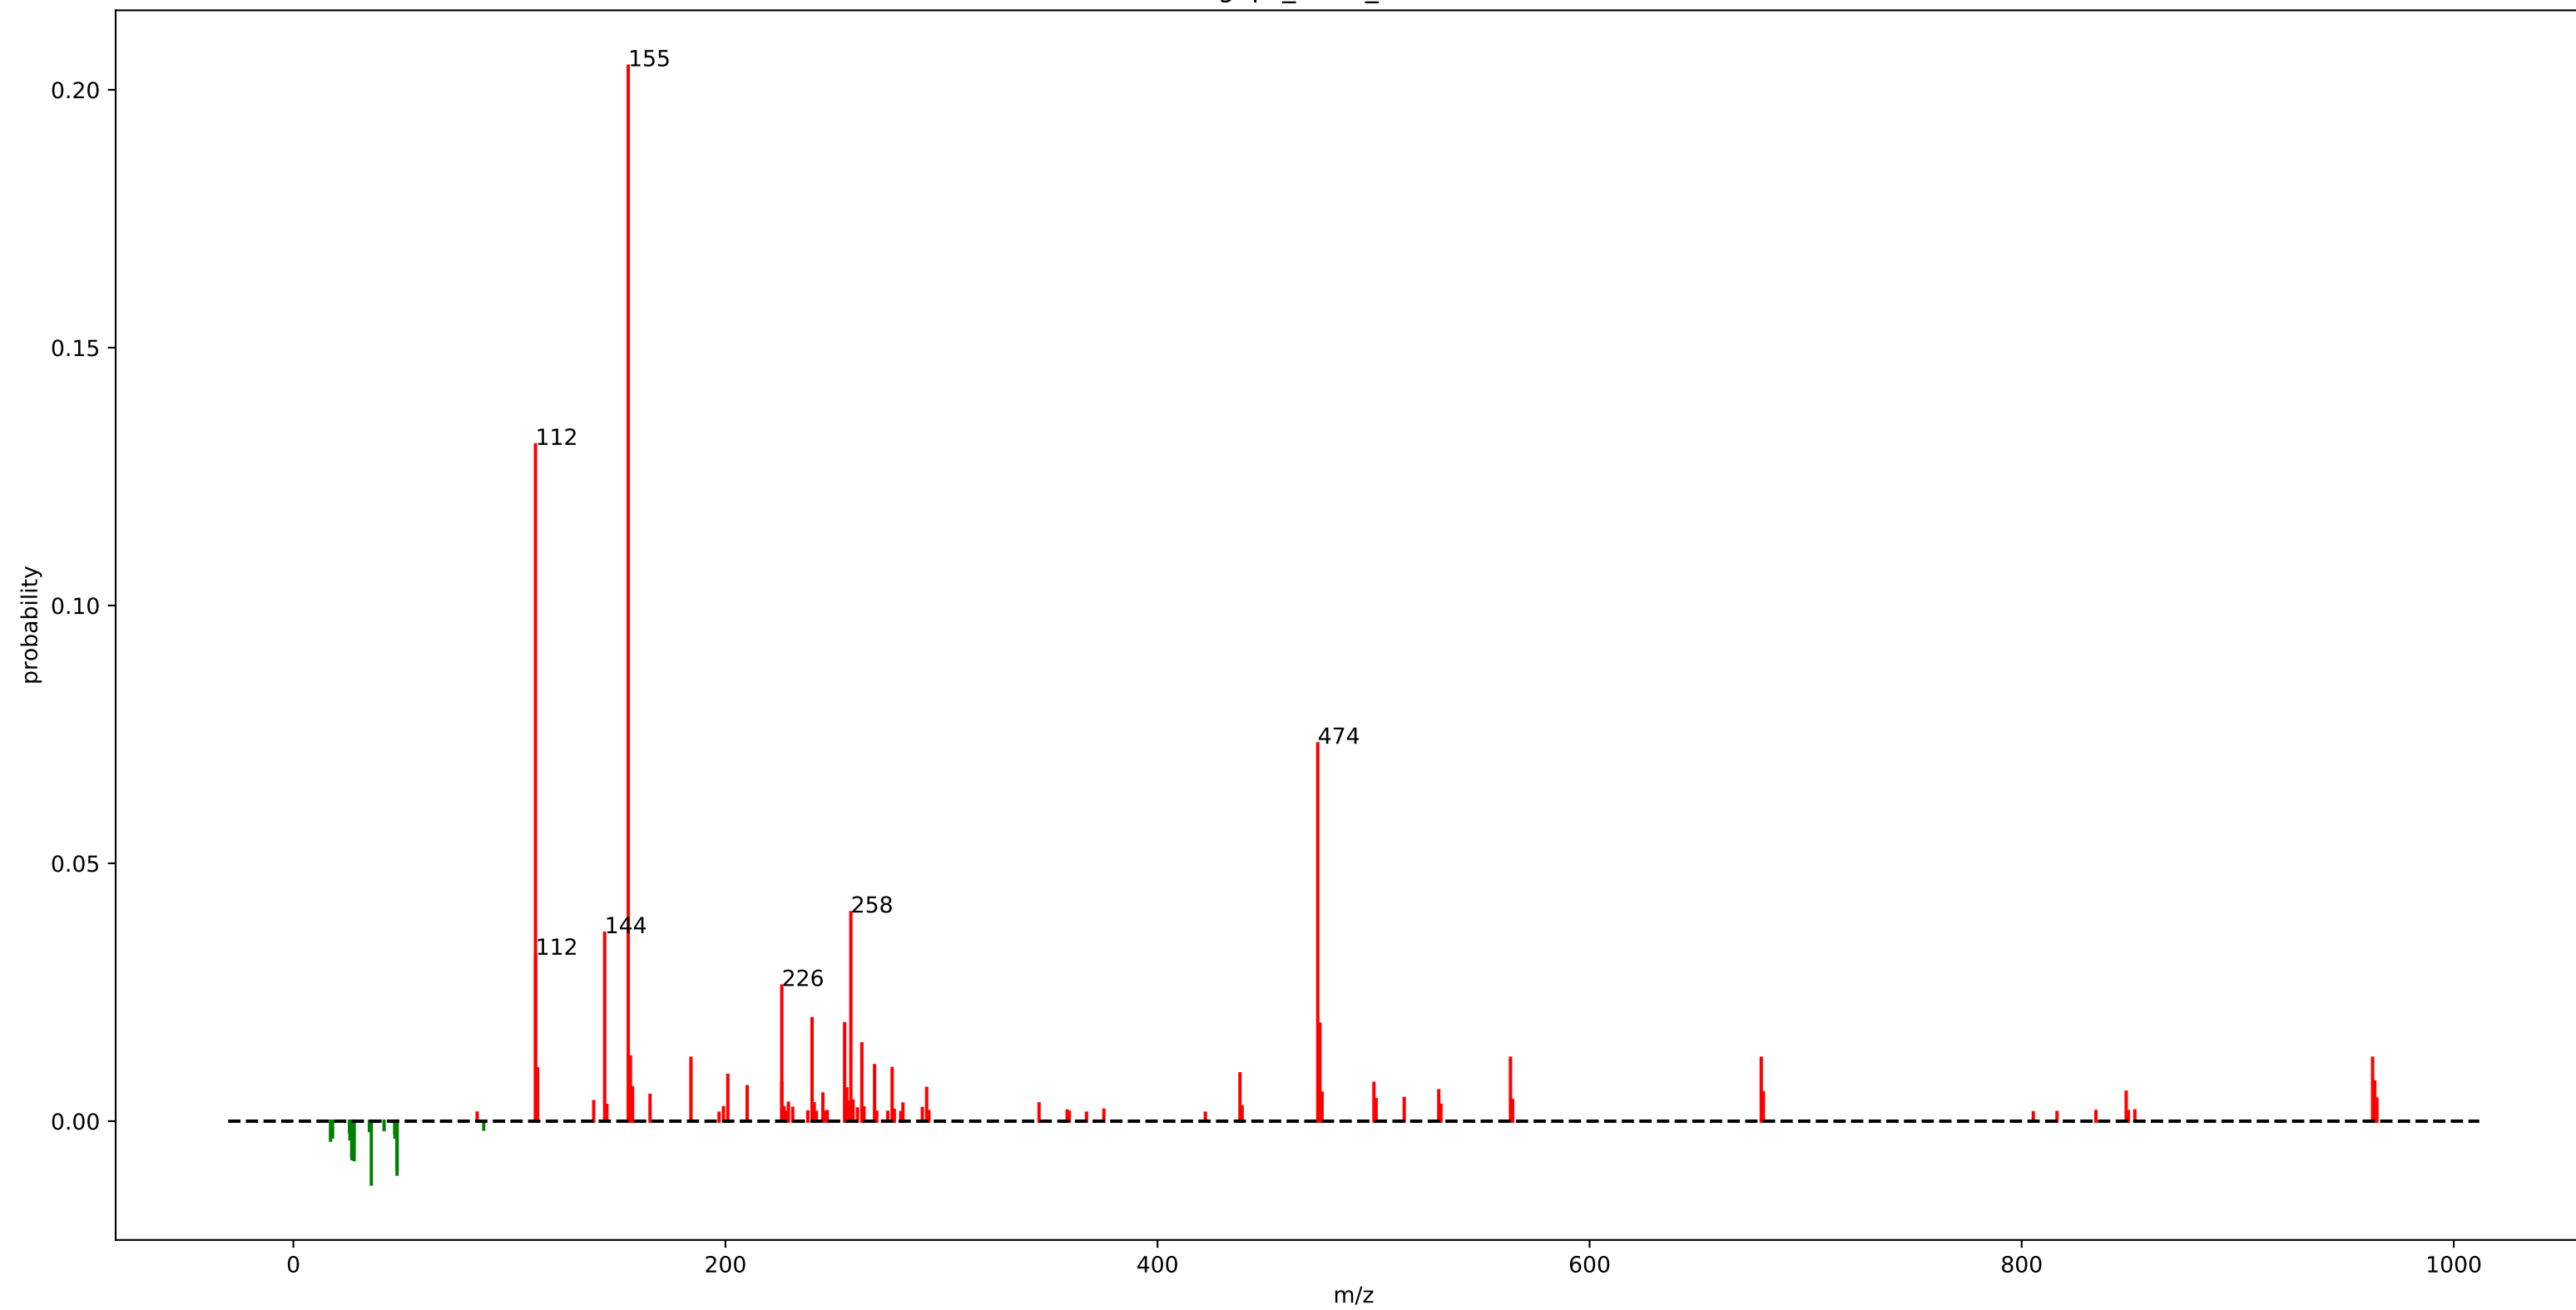

# gnps\_motif\_27.m2m

|                   |        |                   |        |                   |        |
|-------------------|--------|-------------------|--------|-------------------|--------|
| fragment_155.0175 | : 0.20 | fragment_113.0775 | : 0.01 | fragment_165.1025 | : 0.01 |
| fragment_112.0775 | : 0.13 | fragment_438.1725 | : 0.01 |                   |        |
| fragment_474.1725 | : 0.07 | loss_48.0075      | : 0.01 |                   |        |
| fragment_258.0625 | : 0.04 | fragment_201.1275 | : 0.01 |                   |        |
| fragment_144.1025 | : 0.04 | fragment_963.4475 | : 0.01 |                   |        |
| fragment_112.1125 | : 0.03 | loss_28.0975      | : 0.01 |                   |        |
| fragment_226.0875 | : 0.03 | fragment_226.0925 | : 0.01 |                   |        |
| fragment_240.1025 | : 0.02 | fragment_500.1825 | : 0.01 |                   |        |
| fragment_255.1725 | : 0.02 | loss_27.1375      | : 0.01 |                   |        |
| fragment_475.1775 | : 0.02 | loss_27.0075      | : 0.01 |                   |        |
| fragment_263.1425 | : 0.01 | fragment_210.0575 | : 0.01 |                   |        |
| fragment_156.0225 | : 0.01 | fragment_157.0125 | : 0.01 |                   |        |
| fragment_563.3775 | : 0.01 | fragment_293.1525 | : 0.01 |                   |        |
| fragment_679.4625 | : 0.01 | loss_28.0075      | : 0.01 |                   |        |
| loss_36.0825      | : 0.01 | fragment_256.1725 | : 0.01 |                   |        |
| fragment_962.4425 | : 0.01 | fragment_530.1925 | : 0.01 |                   |        |
| fragment_184.0425 | : 0.01 | fragment_848.3925 | : 0.01 |                   |        |
| fragment_269.0275 | : 0.01 | fragment_680.4525 | : 0.01 |                   |        |
| loss_48.0025      | : 0.01 | fragment_476.1775 | : 0.01 |                   |        |
| fragment_277.1575 | : 0.01 | fragment_245.1125 | : 0.01 |                   |        |

rhabdus\_motif\_298.m2m

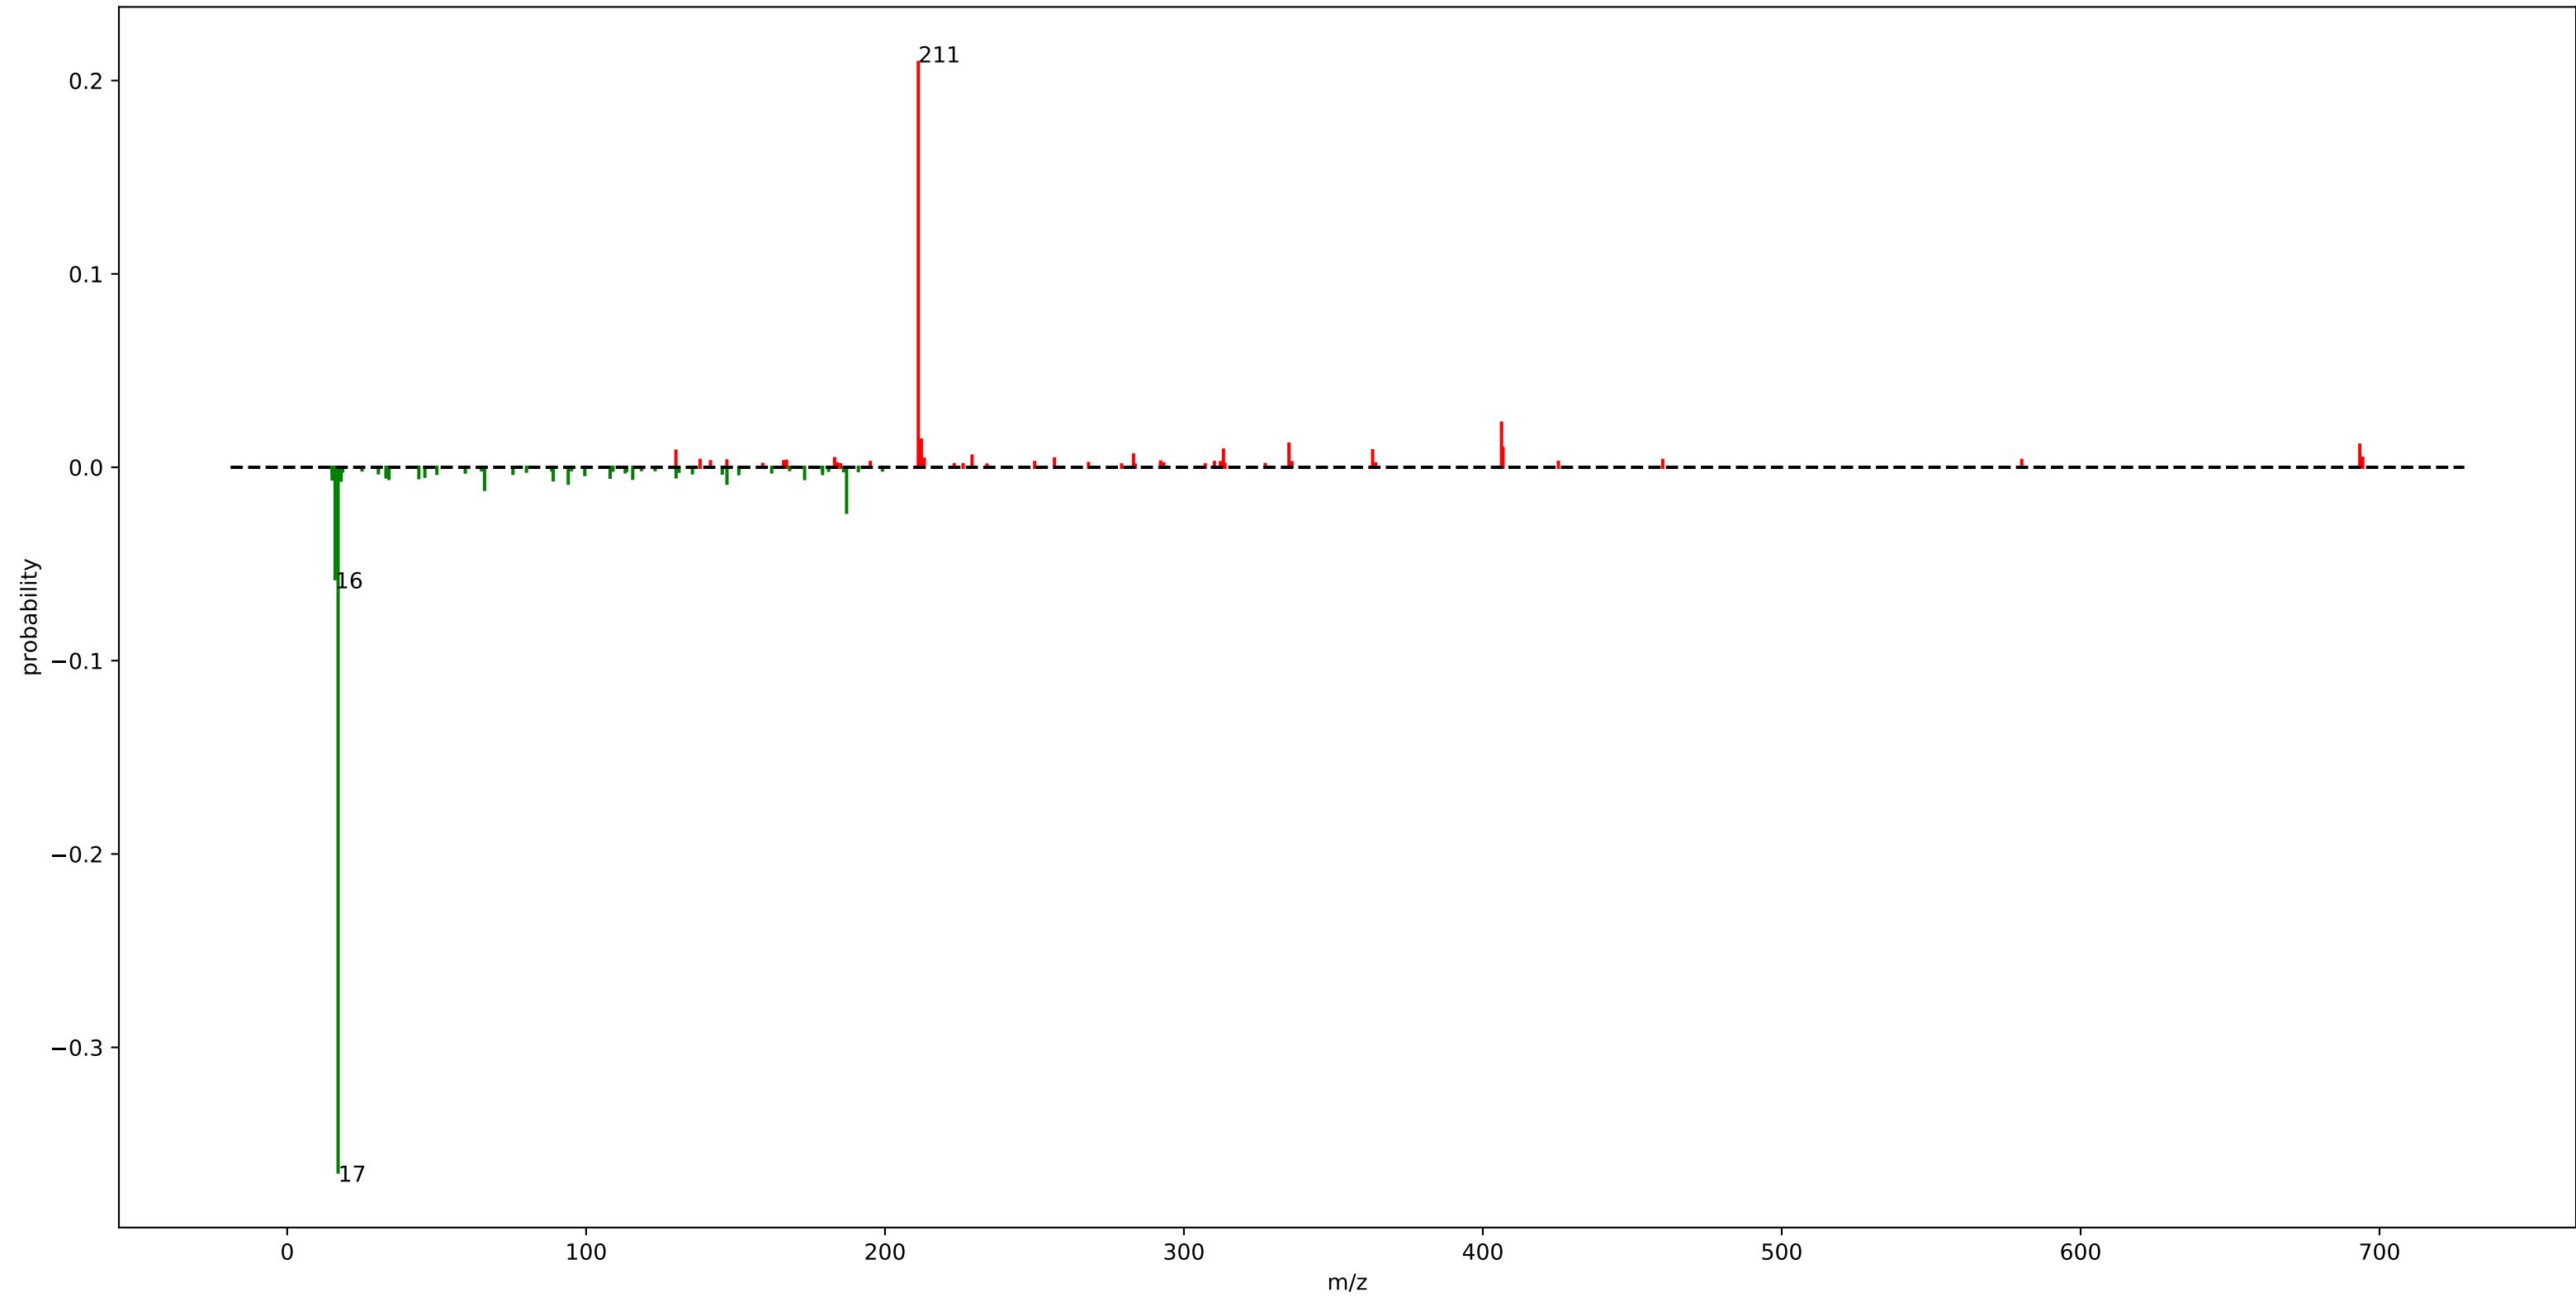

# rhabdus\_motif\_298.m2m

|                   |        |                   |        |
|-------------------|--------|-------------------|--------|
| loss_17.0275      | : 0.36 | fragment_229.1275 | : 0.01 |
| fragment_211.1425 | : 0.21 | loss_34.0525      | : 0.01 |
| loss_16.0225      | : 0.06 | loss_115.5925     | : 0.01 |
| loss_187.1425     | : 0.02 | loss_44.0425      | : 0.01 |
| fragment_406.2675 | : 0.02 | loss_108.0375     | : 0.01 |
| fragment_212.1475 | : 0.01 |                   |        |
| fragment_335.1475 | : 0.01 |                   |        |
| loss_66.0275      | : 0.01 |                   |        |
| fragment_693.3975 | : 0.01 |                   |        |
| fragment_406.7675 | : 0.01 |                   |        |
| fragment_313.2275 | : 0.01 |                   |        |
| fragment_363.1425 | : 0.01 |                   |        |
| fragment_130.0475 | : 0.01 |                   |        |
| loss_147.1225     | : 0.01 |                   |        |
| loss_94.0225      | : 0.01 |                   |        |
| loss_18.0325      | : 0.01 |                   |        |
| loss_89.0025      | : 0.01 |                   |        |
| fragment_283.1425 | : 0.01 |                   |        |
| loss_15.0175      | : 0.01 |                   |        |
| loss_173.0975     | : 0.01 |                   |        |

StrepSalini\_motif\_233.m2m

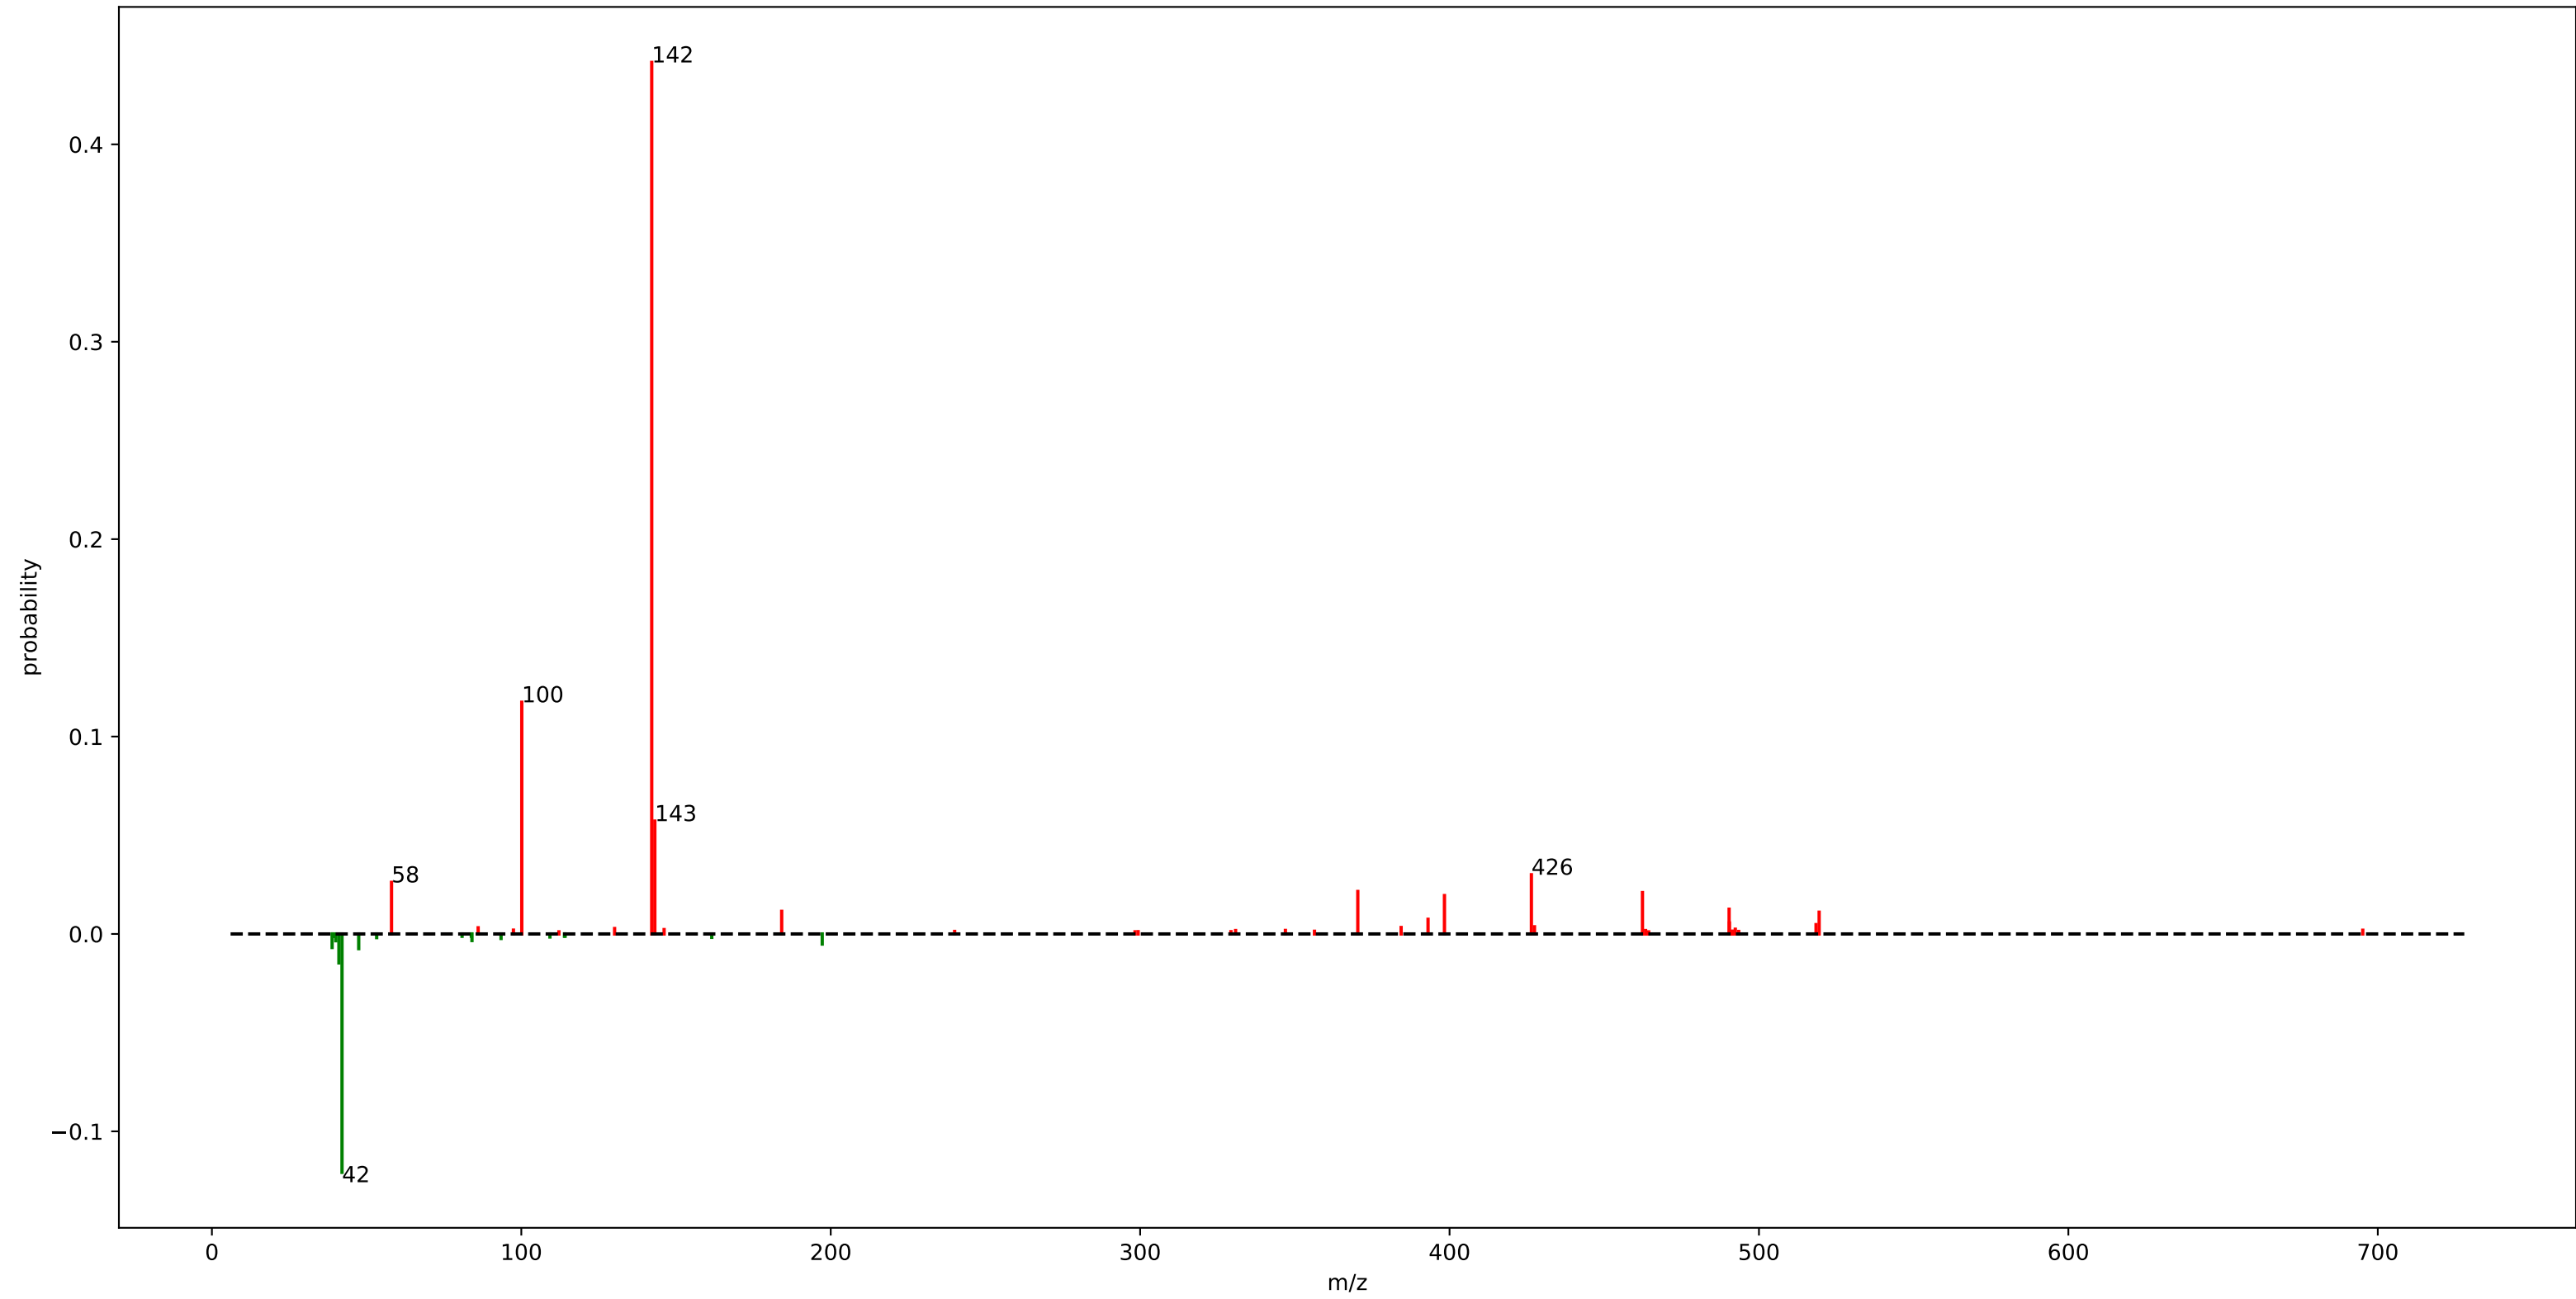

## StrepSalini\_motif\_233.m2m

|                   |        |
|-------------------|--------|
| fragment_142.1500 | : 0.44 |
| loss_42.0500      | : 0.12 |
| fragment_100.1500 | : 0.12 |
| fragment_143.1525 | : 0.06 |
| fragment_426.4500 | : 0.03 |
| fragment_58.0500  | : 0.03 |
| fragment_370.3500 | : 0.02 |
| fragment_462.3500 | : 0.02 |
| fragment_398.3525 | : 0.02 |
| loss_41.0500      | : 0.01 |
| fragment_490.3525 | : 0.01 |
| fragment_184.1500 | : 0.01 |
| fragment_519.4500 | : 0.01 |
| loss_47.4500      | : 0.01 |
| fragment_393.0500 | : 0.01 |
| loss_38.8500      | : 0.01 |
| fragment_490.4500 | : 0.01 |
| loss_197.2525     | : 0.01 |

StrepSalini\_motif\_48.m2m

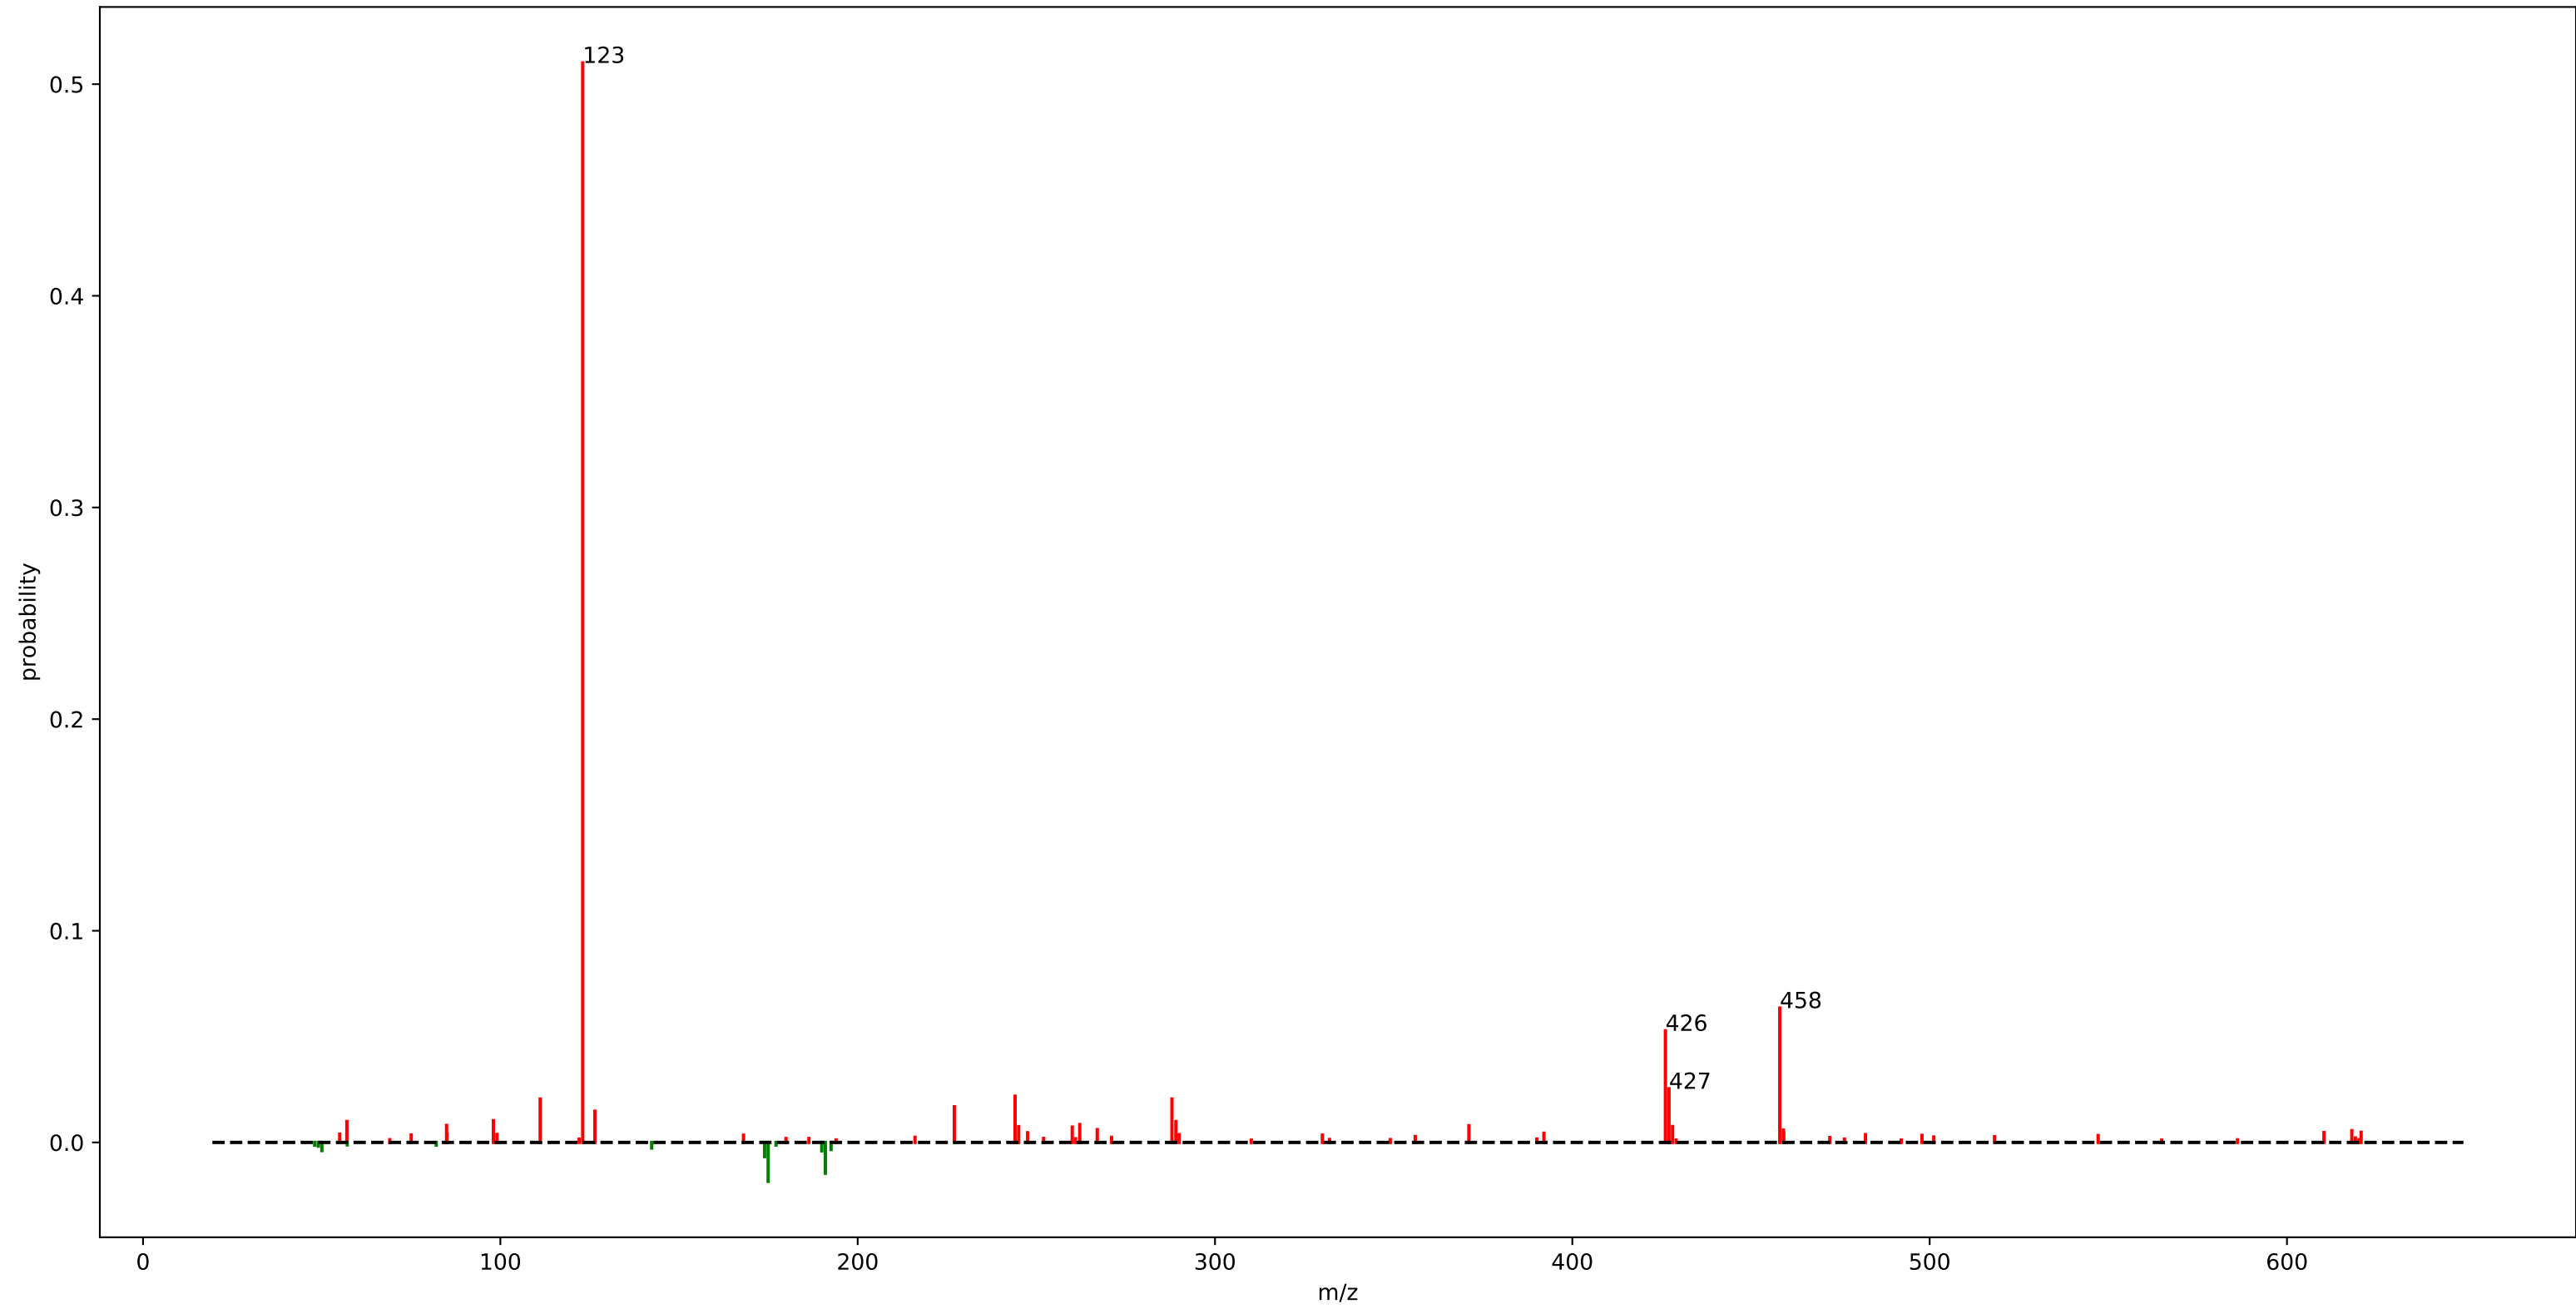

## StrepSalini\_motif\_48.m2m

|                   |        |                   |        |
|-------------------|--------|-------------------|--------|
| fragment_123.0500 | : 0.51 | loss_173.9500     | : 0.01 |
| fragment_458.0500 | : 0.06 | fragment_267.0500 | : 0.01 |
| fragment_426.0500 | : 0.05 | fragment_459.0500 | : 0.01 |
| fragment_427.0500 | : 0.03 | fragment_618.1500 | : 0.01 |
| fragment_244.0500 | : 0.02 |                   |        |
| fragment_287.9500 | : 0.02 |                   |        |
| fragment_111.1500 | : 0.02 |                   |        |
| loss_174.9500     | : 0.02 |                   |        |
| fragment_227.0500 | : 0.02 |                   |        |
| fragment_126.4500 | : 0.01 |                   |        |
| loss_190.9500     | : 0.01 |                   |        |
| fragment_98.0500  | : 0.01 |                   |        |
| fragment_57.0500  | : 0.01 |                   |        |
| fragment_289.0500 | : 0.01 |                   |        |
| fragment_262.1500 | : 0.01 |                   |        |
| fragment_84.9500  | : 0.01 |                   |        |
| fragment_371.0500 | : 0.01 |                   |        |
| fragment_428.0500 | : 0.01 |                   |        |
| fragment_245.0525 | : 0.01 |                   |        |
| fragment_260.0500 | : 0.01 |                   |        |



euphorbia\_motif\_295.m2m

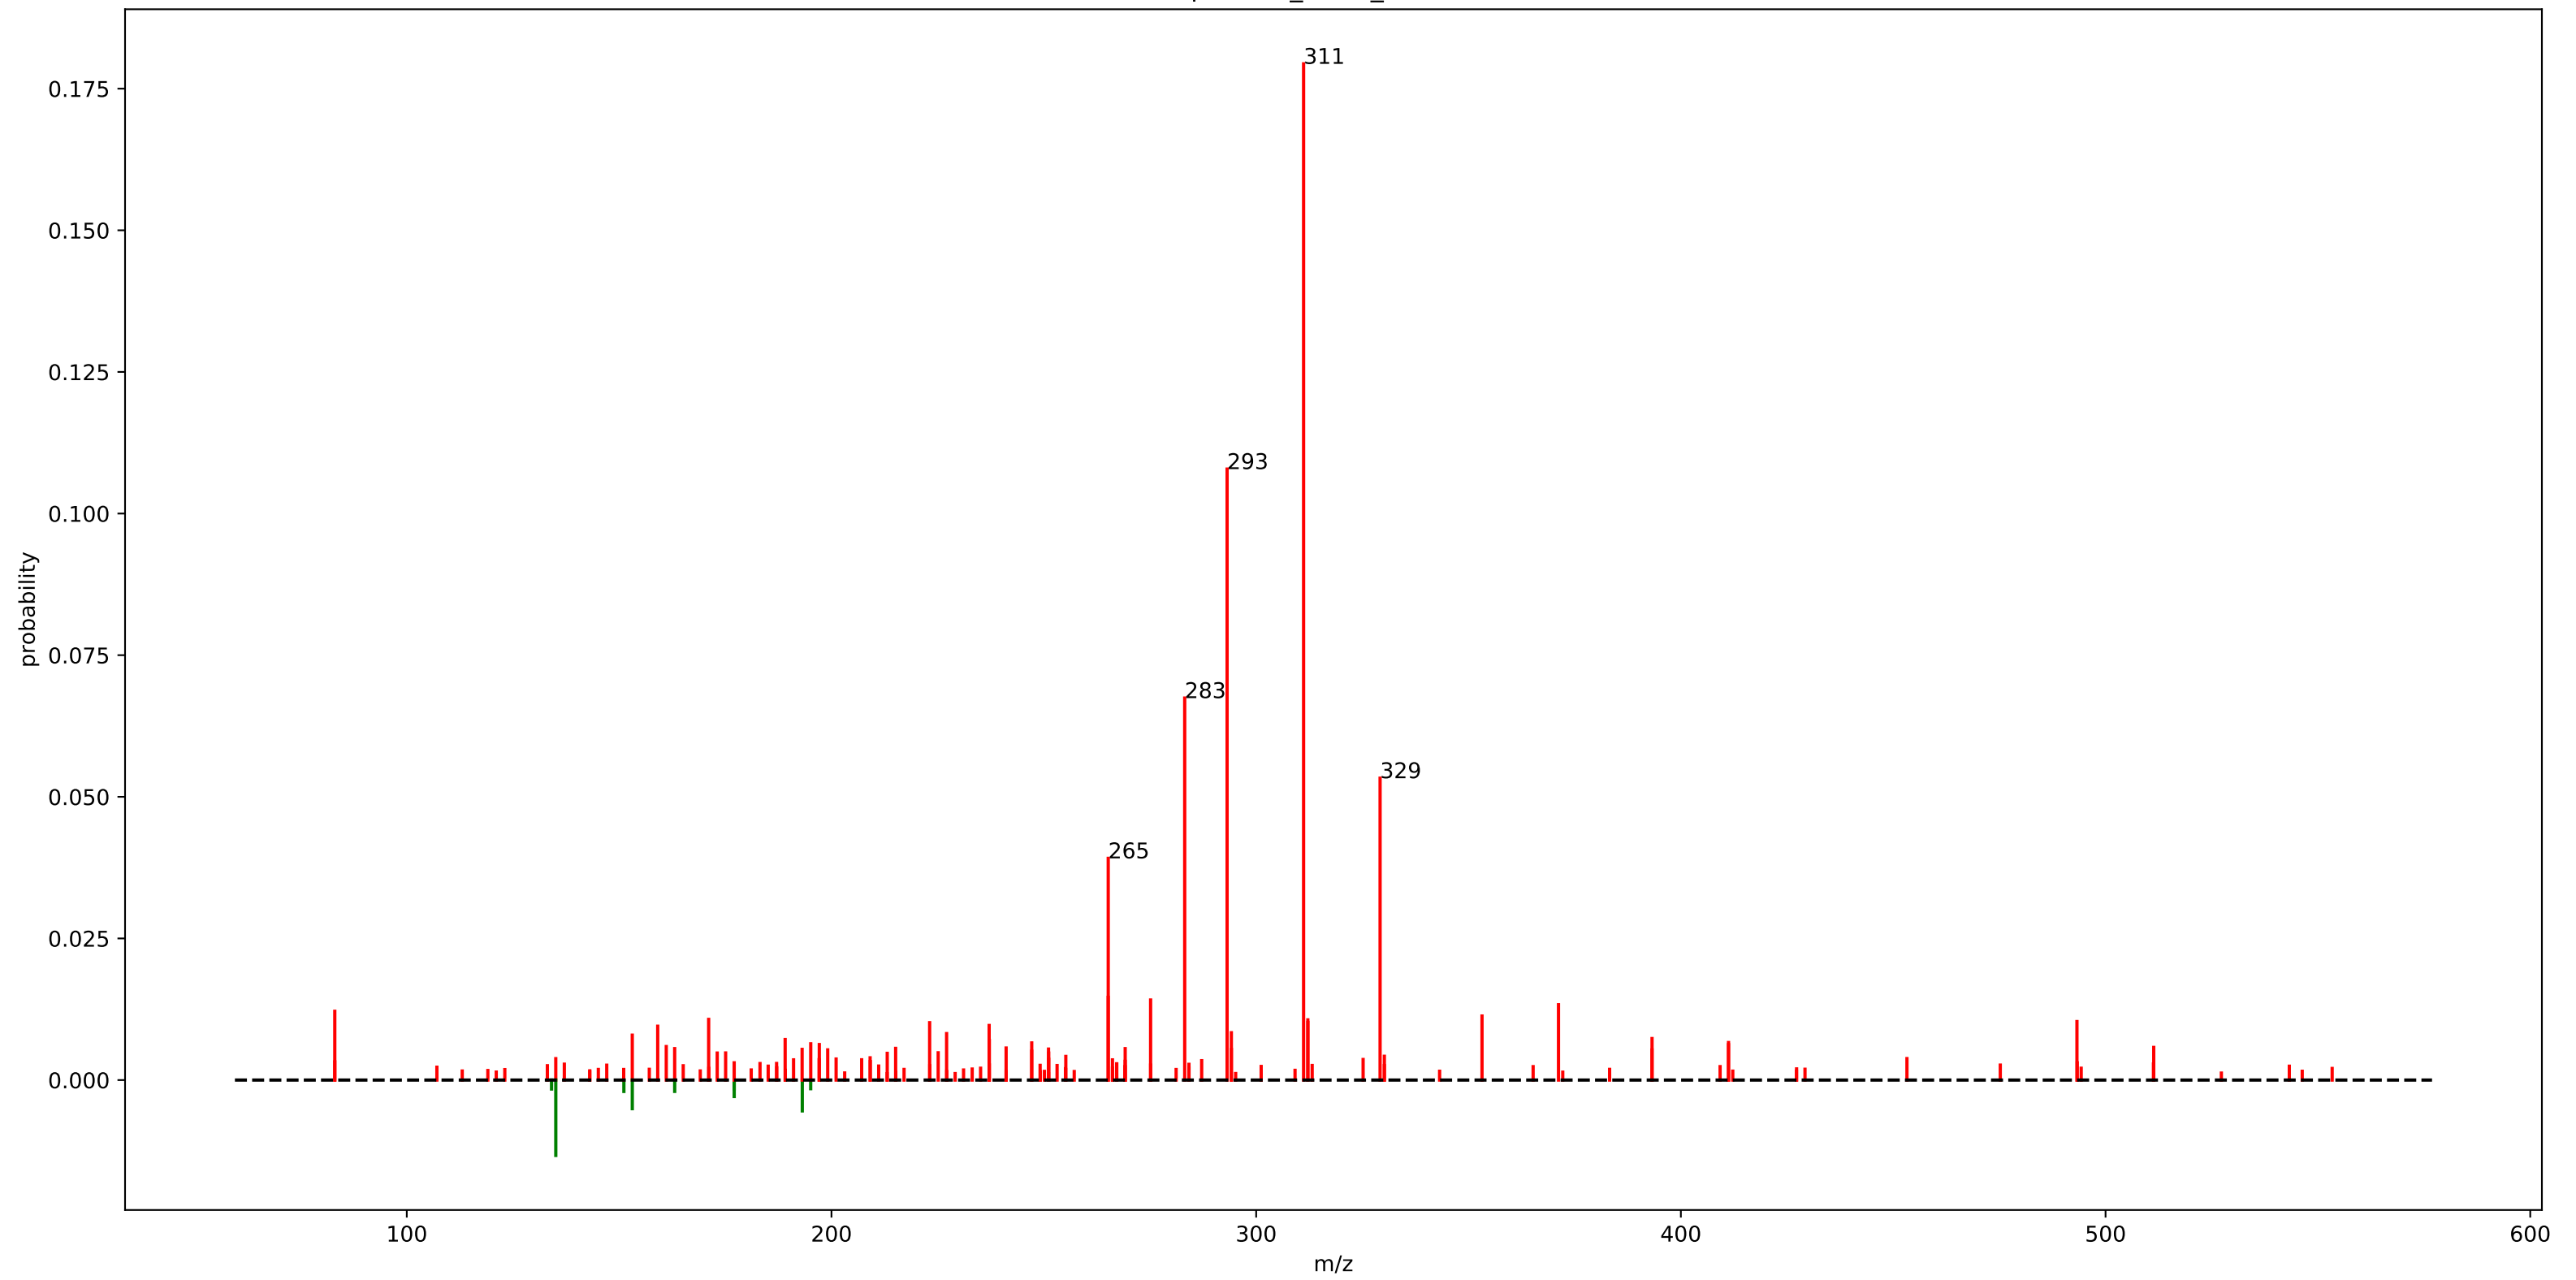

# euphorbia\_motif\_295.m2m

|                   |        |                   |        |                   |        |
|-------------------|--------|-------------------|--------|-------------------|--------|
| fragment_311.1675 | : 0.18 | fragment_153.0925 | : 0.01 | fragment_393.2075 | : 0.01 |
| fragment_293.1575 | : 0.11 | fragment_393.2125 | : 0.01 | fragment_247.1475 | : 0.01 |
| fragment_283.1725 | : 0.07 | fragment_189.0925 | : 0.01 | loss_153.0975     | : 0.01 |
| fragment_329.1775 | : 0.05 | fragment_237.1675 | : 0.01 |                   |        |
| fragment_265.1625 | : 0.04 | fragment_411.2225 | : 0.01 |                   |        |
| fragment_265.1575 | : 0.01 | fragment_247.1525 | : 0.01 |                   |        |
| fragment_275.1425 | : 0.01 | fragment_195.1175 | : 0.01 |                   |        |
| loss_135.0875     | : 0.01 | fragment_197.1325 | : 0.01 |                   |        |
| fragment_371.1875 | : 0.01 | fragment_411.2175 | : 0.01 |                   |        |
| fragment_83.0475  | : 0.01 | fragment_161.0975 | : 0.01 |                   |        |
| fragment_353.1775 | : 0.01 | fragment_511.3425 | : 0.01 |                   |        |
| fragment_171.0825 | : 0.01 | fragment_241.1225 | : 0.01 |                   |        |
| fragment_312.1675 | : 0.01 | fragment_215.1075 | : 0.01 |                   |        |
| fragment_493.2625 | : 0.01 | fragment_163.0775 | : 0.01 |                   |        |
| fragment_312.1725 | : 0.01 | fragment_269.1575 | : 0.01 |                   |        |
| fragment_223.1125 | : 0.01 | fragment_251.1075 | : 0.01 |                   |        |
| fragment_237.1275 | : 0.01 | loss_193.1275     | : 0.01 |                   |        |
| fragment_159.0825 | : 0.01 | fragment_193.0875 | : 0.01 |                   |        |
| fragment_294.1575 | : 0.01 | fragment_294.1625 | : 0.01 |                   |        |
| fragment_227.1075 | : 0.01 | fragment_199.1125 | : 0.01 |                   |        |

urine\_mass2motif\_266.m2m

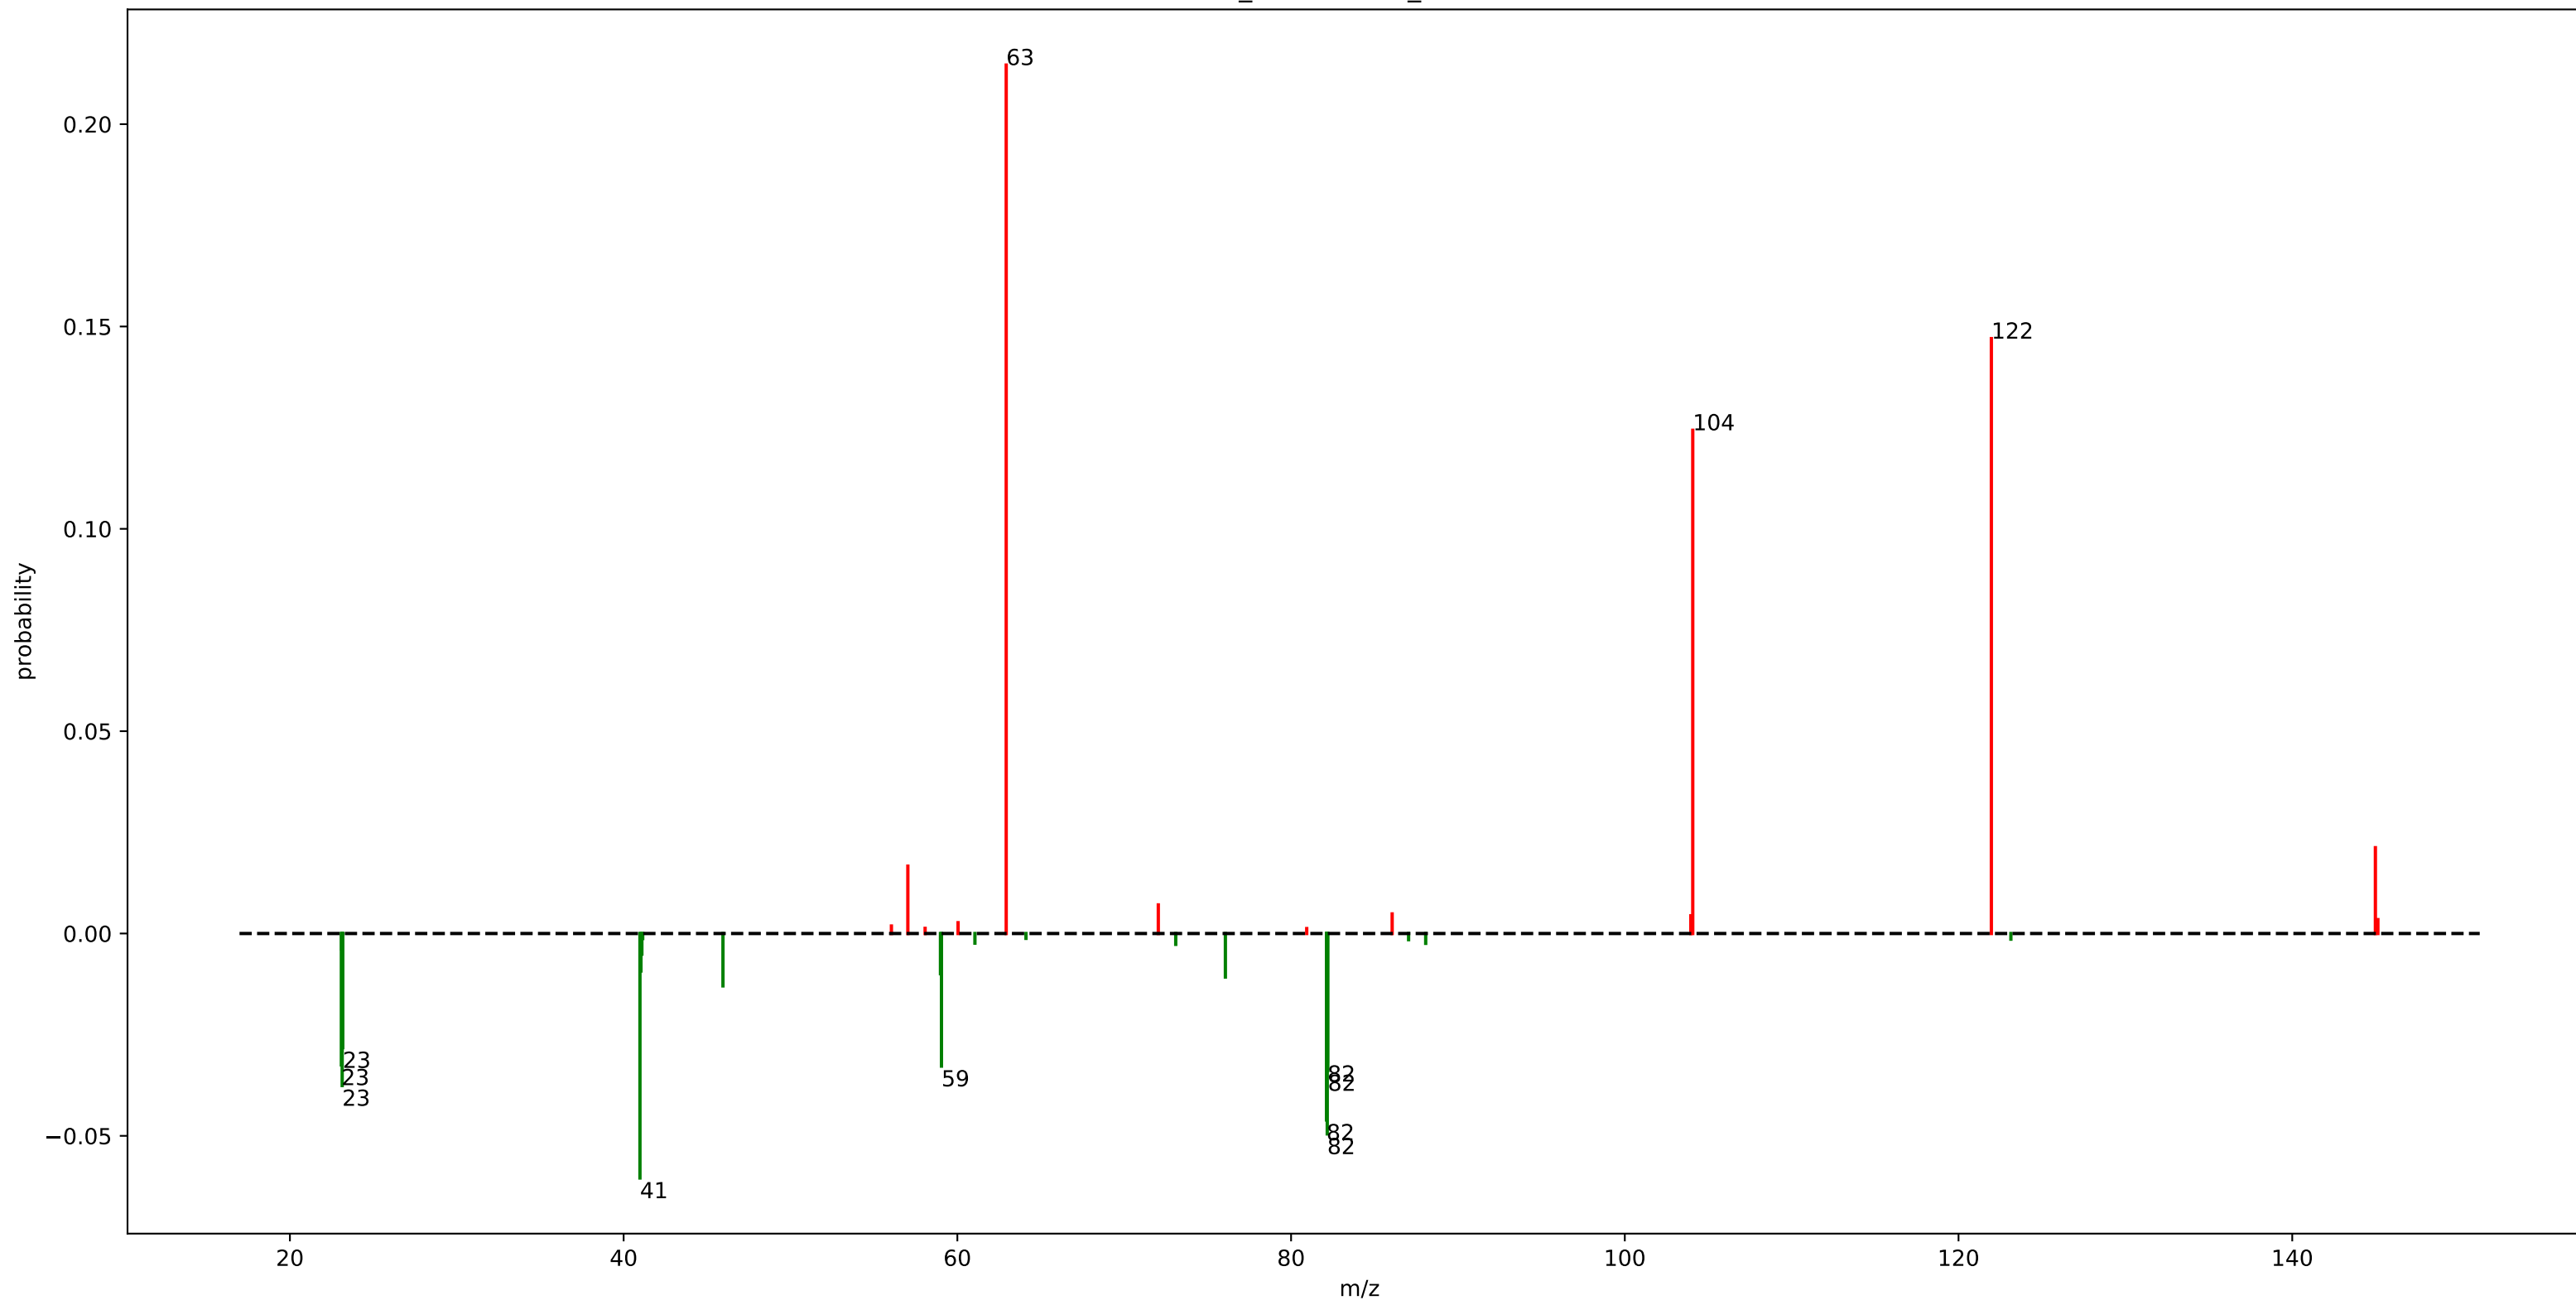

# urine\_mass2motif\_266.m2m

|                   |        |              |        |
|-------------------|--------|--------------|--------|
| fragment_62.9275  | : 0.21 | loss_82.1375 | : 0.01 |
| fragment_121.9675 | : 0.15 | loss_41.0925 | : 0.01 |
| fragment_104.0725 | : 0.12 |              |        |
| loss_40.9775      | : 0.06 |              |        |
| loss_82.1675      | : 0.05 |              |        |
| loss_82.1225      | : 0.05 |              |        |
| loss_23.1325      | : 0.04 |              |        |
| loss_82.2025      | : 0.03 |              |        |
| loss_59.0475      | : 0.03 |              |        |
| loss_23.0825      | : 0.03 |              |        |
| loss_82.1775      | : 0.03 |              |        |
| loss_23.1675      | : 0.03 |              |        |
| loss_23.1425      | : 0.02 |              |        |
| fragment_144.9825 | : 0.02 |              |        |
| fragment_57.0325  | : 0.02 |              |        |
| loss_45.9525      | : 0.01 |              |        |
| loss_76.0625      | : 0.01 |              |        |
| loss_58.9875      | : 0.01 |              |        |
| loss_41.0375      | : 0.01 |              |        |
| fragment_72.0425  | : 0.01 |              |        |

mb\_motif\_40.m2m

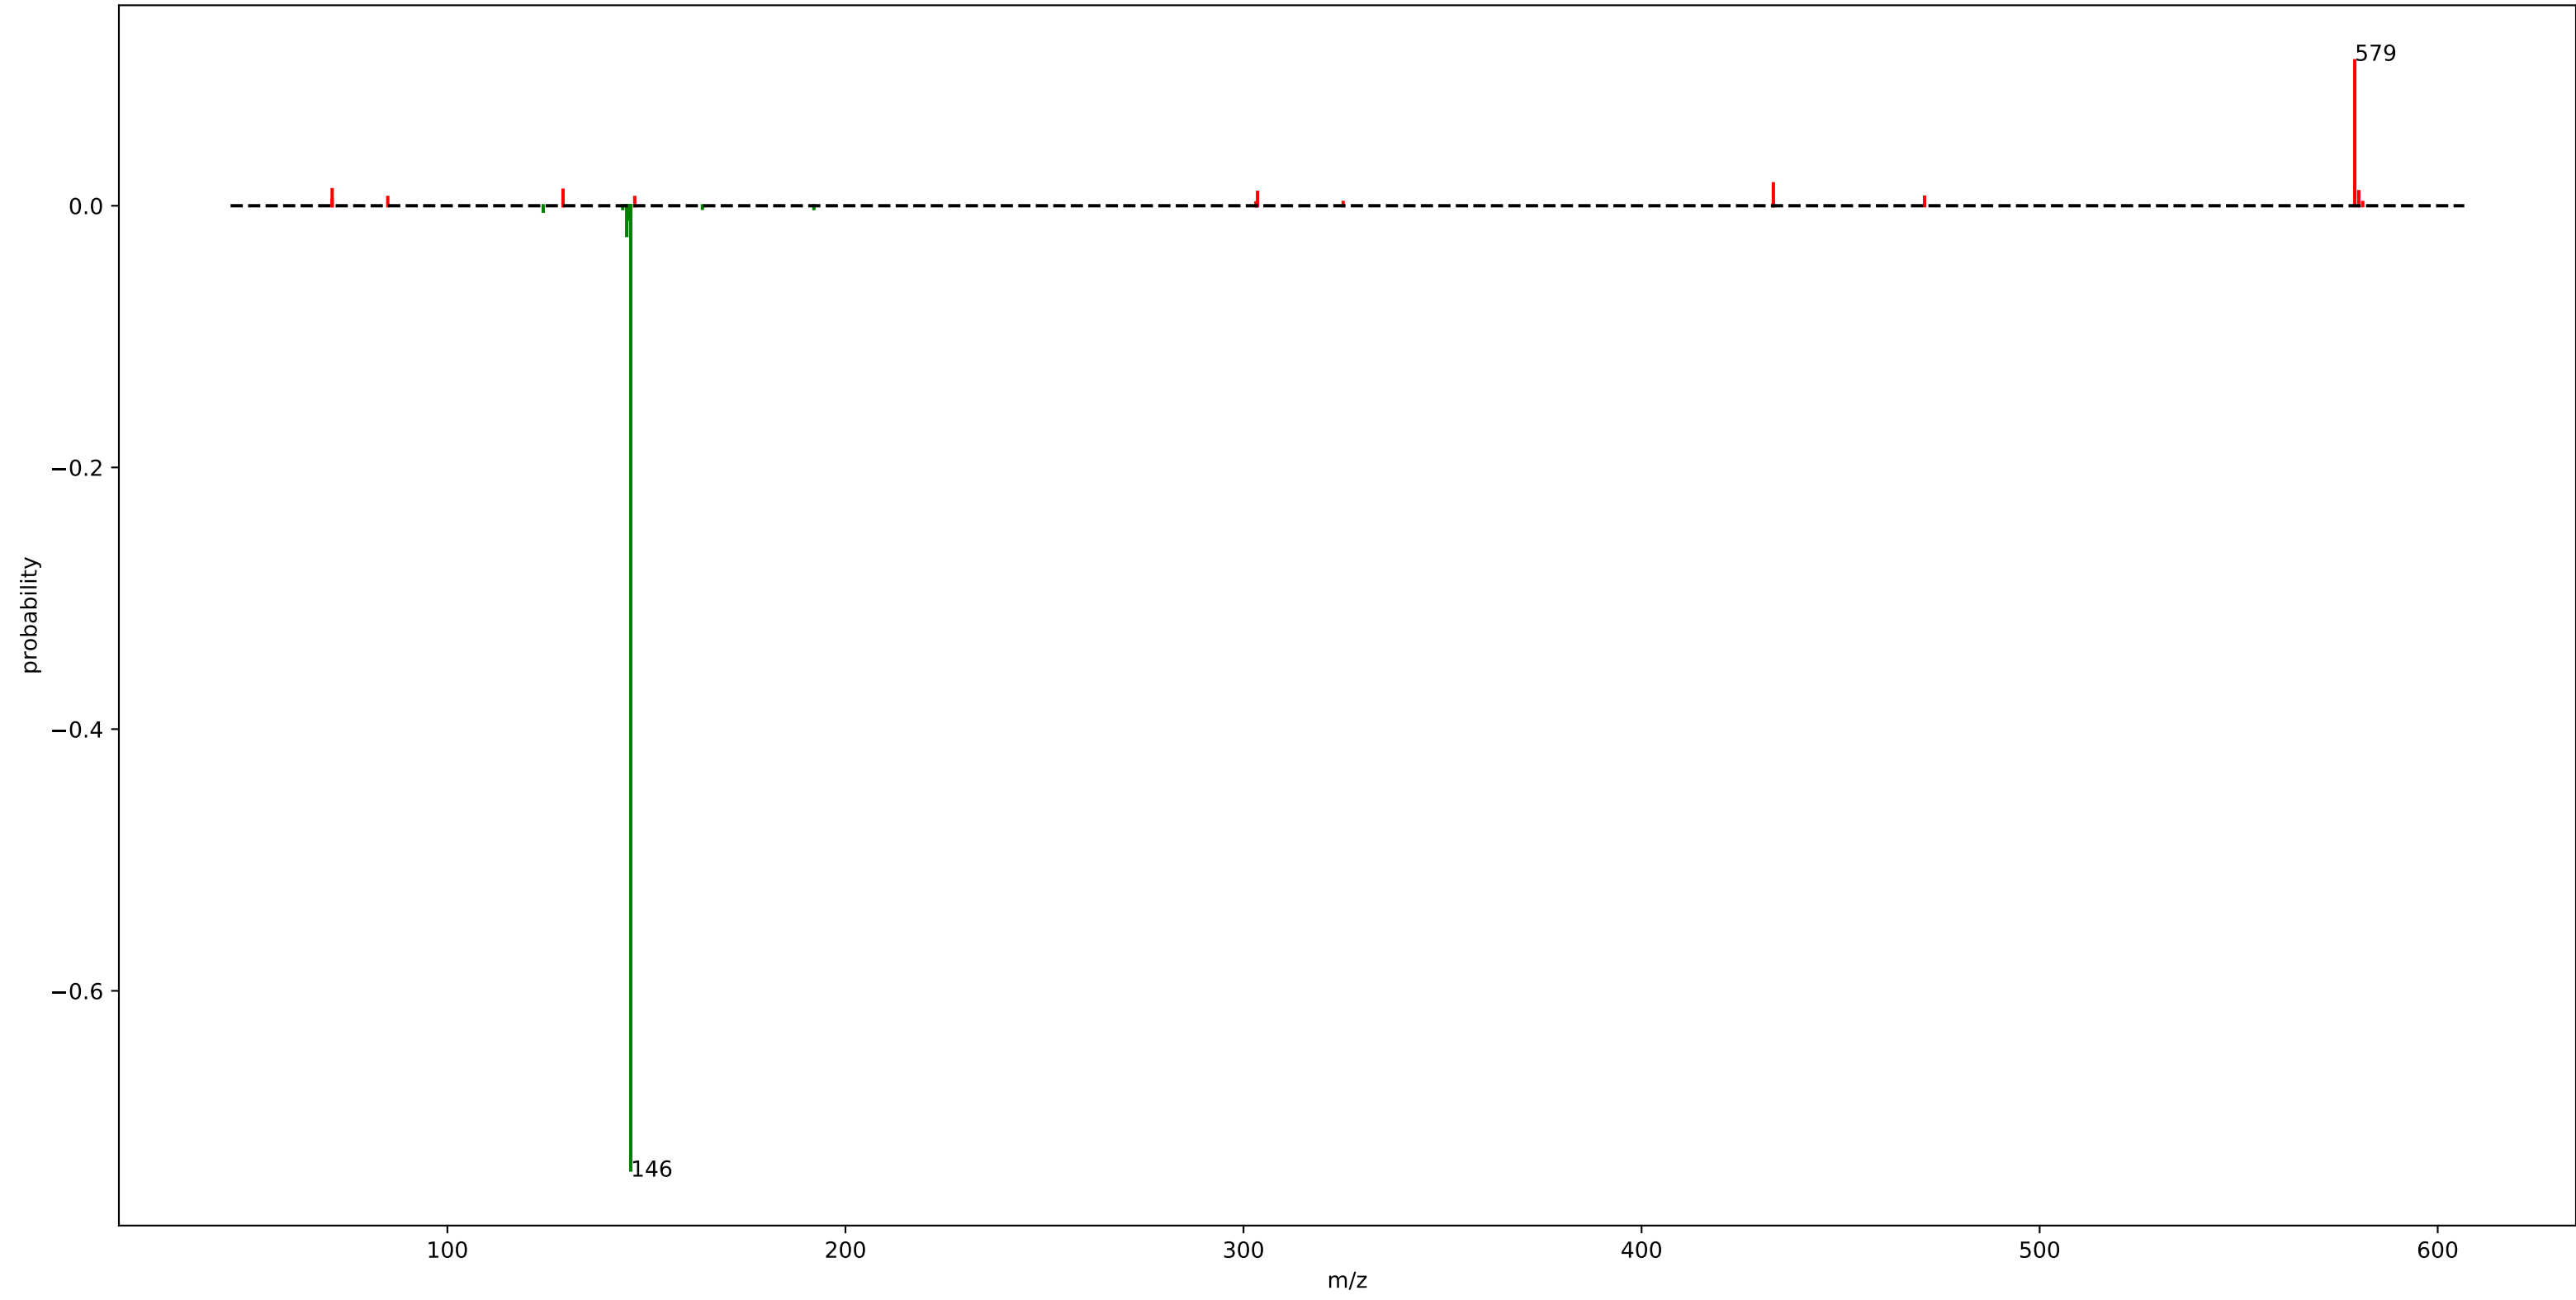

## mb\_motif\_40.m2m

|                   |        |
|-------------------|--------|
| loss_146.0575     | : 0.74 |
| fragment_579.1725 | : 0.11 |
| loss_145.0525     | : 0.02 |
| fragment_433.1075 | : 0.02 |
| fragment_71.0525  | : 0.01 |
| fragment_129.0525 | : 0.01 |
| fragment_580.1725 | : 0.01 |
| loss_145.5875     | : 0.01 |
| fragment_303.5225 | : 0.01 |
| fragment_471.0925 | : 0.01 |
| fragment_147.0675 | : 0.01 |
| fragment_85.0225  | : 0.01 |

gnps\_motif\_62.m2m

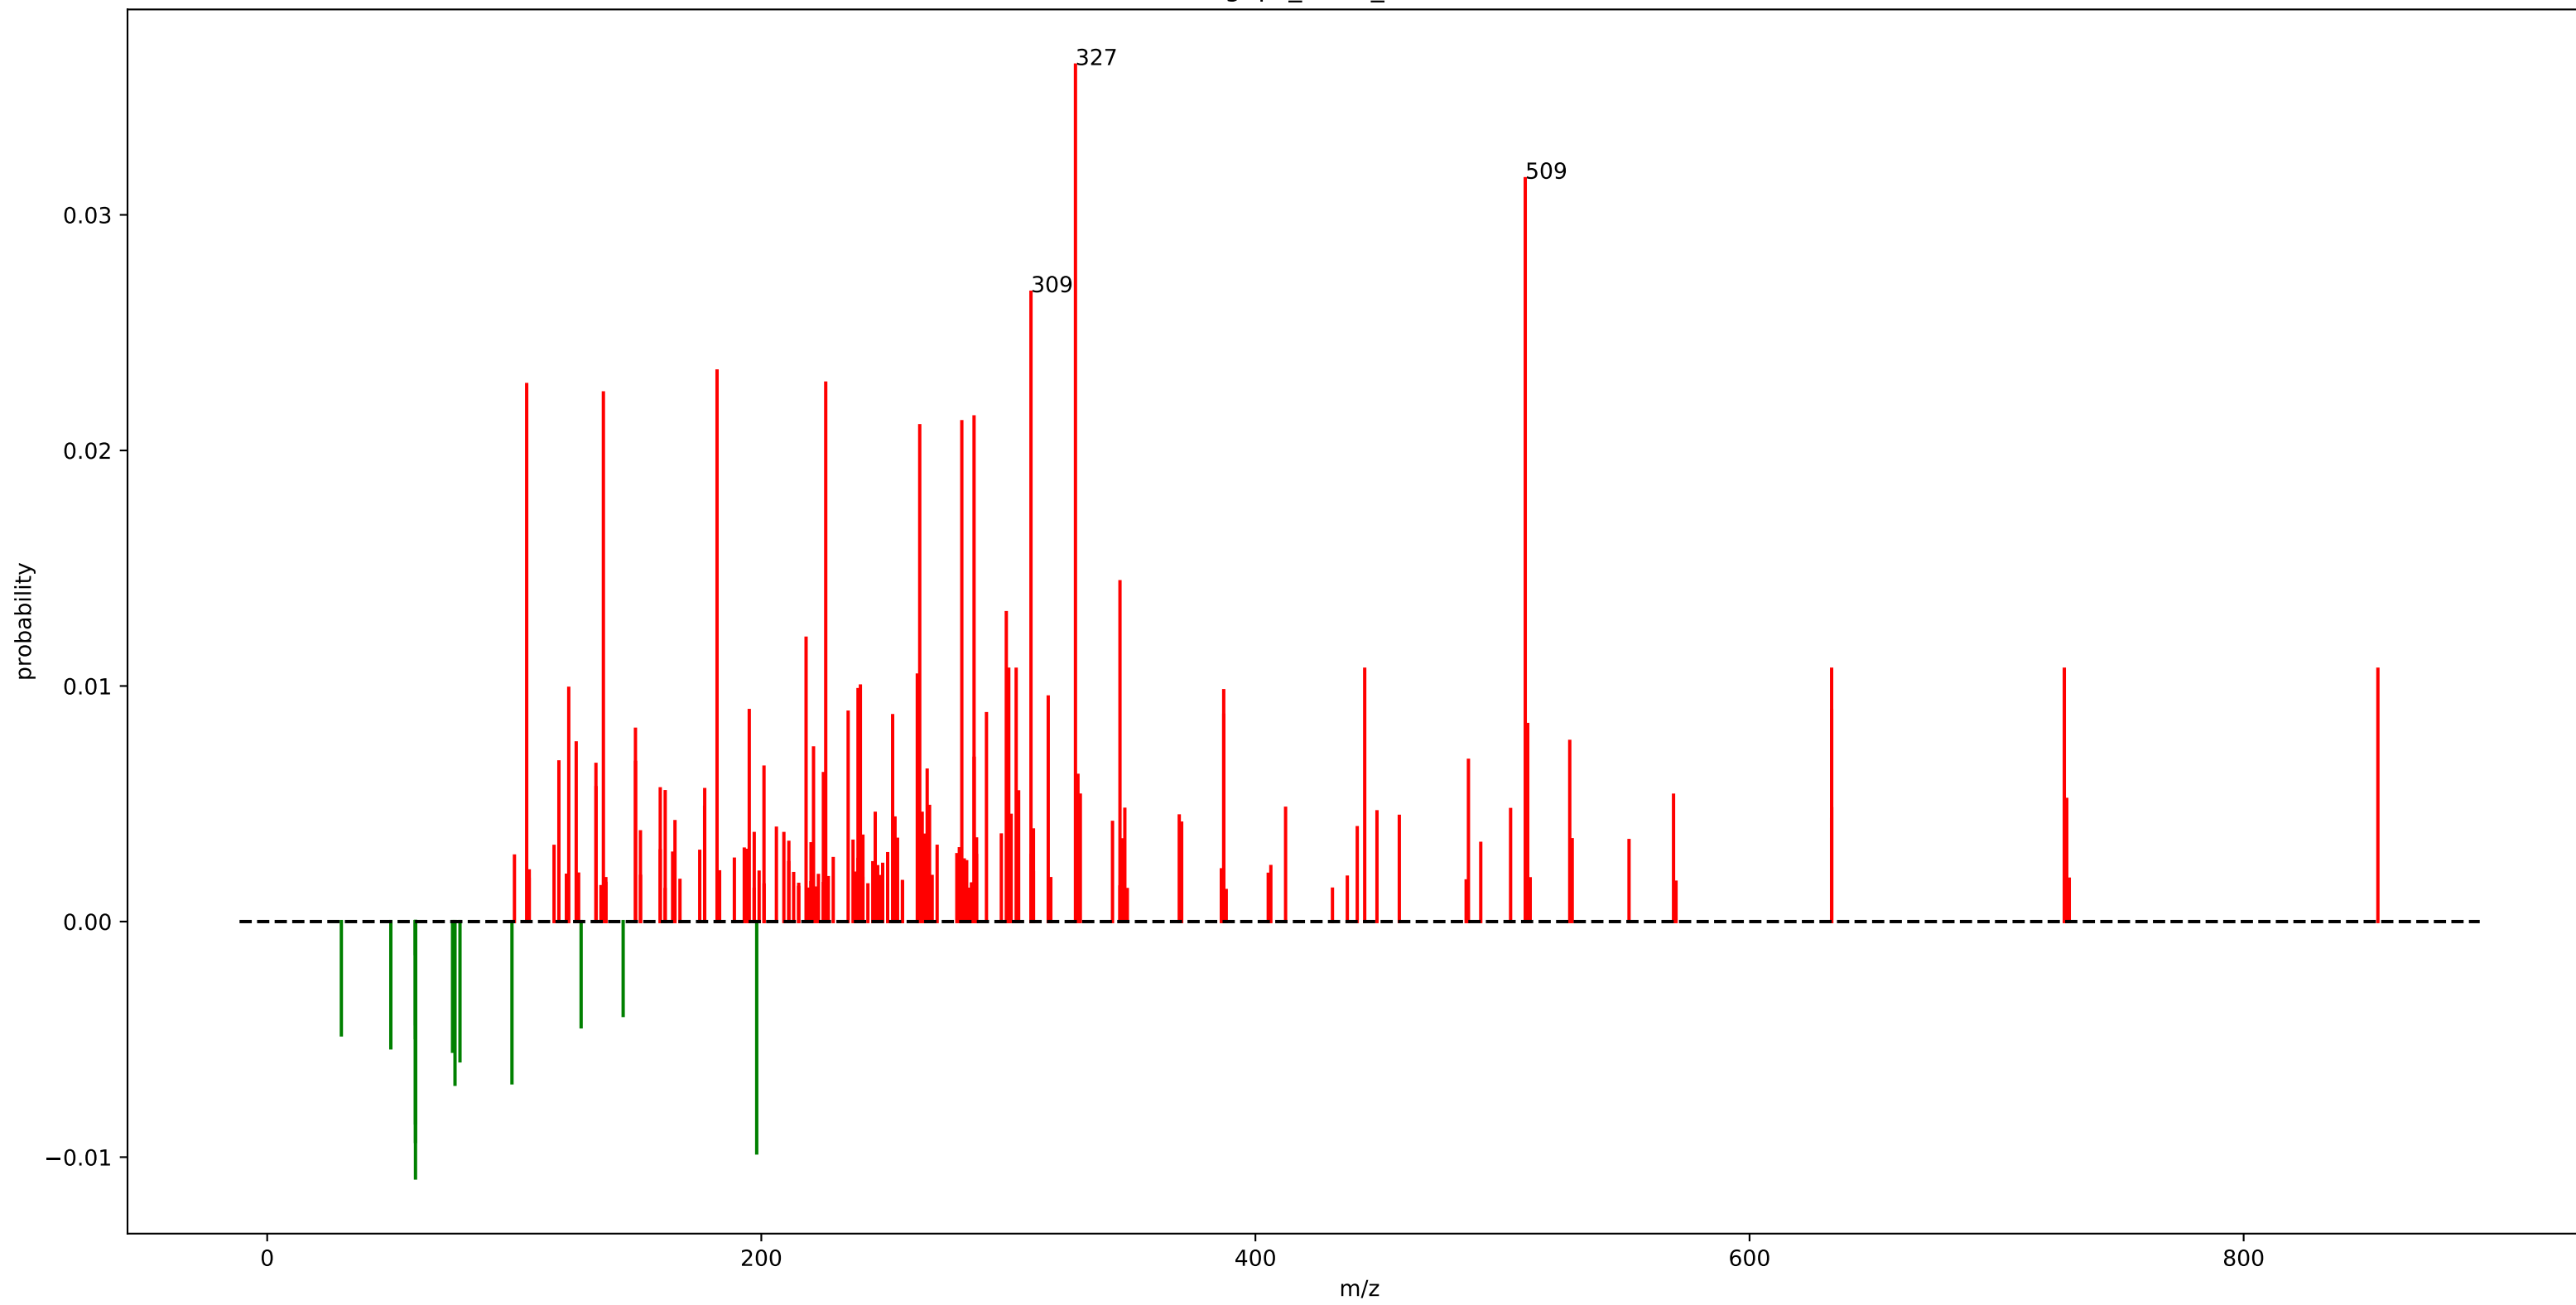

# gnps\_motif\_62.m2m

|                   |        |                   |        |                   |        |                   |        |
|-------------------|--------|-------------------|--------|-------------------|--------|-------------------|--------|
| fragment_327.1575 | : 0.04 | fragment_263.1425 | : 0.01 | fragment_286.1525 | : 0.01 | loss_50.0375      | : 0.01 |
| fragment_509.2175 | : 0.03 | fragment_240.1025 | : 0.01 | loss_76.0175      | : 0.01 | fragment_728.4075 | : 0.01 |
| fragment_309.1475 | : 0.03 | fragment_122.0575 | : 0.01 | fragment_486.2225 | : 0.01 |                   |        |
| fragment_182.0825 | : 0.02 | fragment_239.1425 | : 0.01 | loss_99.0725      | : 0.01 |                   |        |
| fragment_226.0725 | : 0.02 | loss_198.1375     | : 0.01 | fragment_118.0675 | : 0.01 |                   |        |
| fragment_105.0325 | : 0.02 | fragment_387.1675 | : 0.01 | fragment_149.0975 | : 0.01 |                   |        |
| fragment_136.0775 | : 0.02 | fragment_316.1325 | : 0.01 | fragment_133.0625 | : 0.01 |                   |        |
| fragment_286.1075 | : 0.02 | loss_60.0125      | : 0.01 | fragment_201.0825 | : 0.01 |                   |        |
| fragment_281.1525 | : 0.02 | fragment_195.1175 | : 0.01 | fragment_267.1375 | : 0.01 |                   |        |
| fragment_264.1225 | : 0.02 | fragment_633.2425 | : 0.01 | fragment_225.1275 | : 0.01 |                   |        |
| fragment_345.1725 | : 0.01 | fragment_235.1475 | : 0.01 | fragment_328.1625 | : 0.01 |                   |        |
| fragment_299.1625 | : 0.01 | fragment_291.1375 | : 0.01 | loss_78.0325      | : 0.01 |                   |        |
| fragment_218.1175 | : 0.01 | fragment_387.1825 | : 0.01 | fragment_133.1025 | : 0.01 |                   |        |
| loss_60.0225      | : 0.01 | fragment_253.1575 | : 0.01 | fragment_159.0875 | : 0.01 |                   |        |
| fragment_633.2275 | : 0.01 | loss_60.0325      | : 0.01 | fragment_177.0925 | : 0.01 |                   |        |
| fragment_727.4075 | : 0.01 | fragment_510.2175 | : 0.01 | fragment_161.0975 | : 0.01 |                   |        |
| fragment_300.1575 | : 0.01 | fragment_149.0575 | : 0.01 | fragment_304.1525 | : 0.01 |                   |        |
| fragment_444.2375 | : 0.01 | fragment_527.2275 | : 0.01 | loss_75.0125      | : 0.01 |                   |        |
| fragment_854.3375 | : 0.01 | fragment_125.0725 | : 0.01 | fragment_329.1275 | : 0.01 |                   |        |
| fragment_303.1525 | : 0.01 | fragment_221.1325 | : 0.01 | fragment_569.2375 | : 0.01 |                   |        |



motif\_539

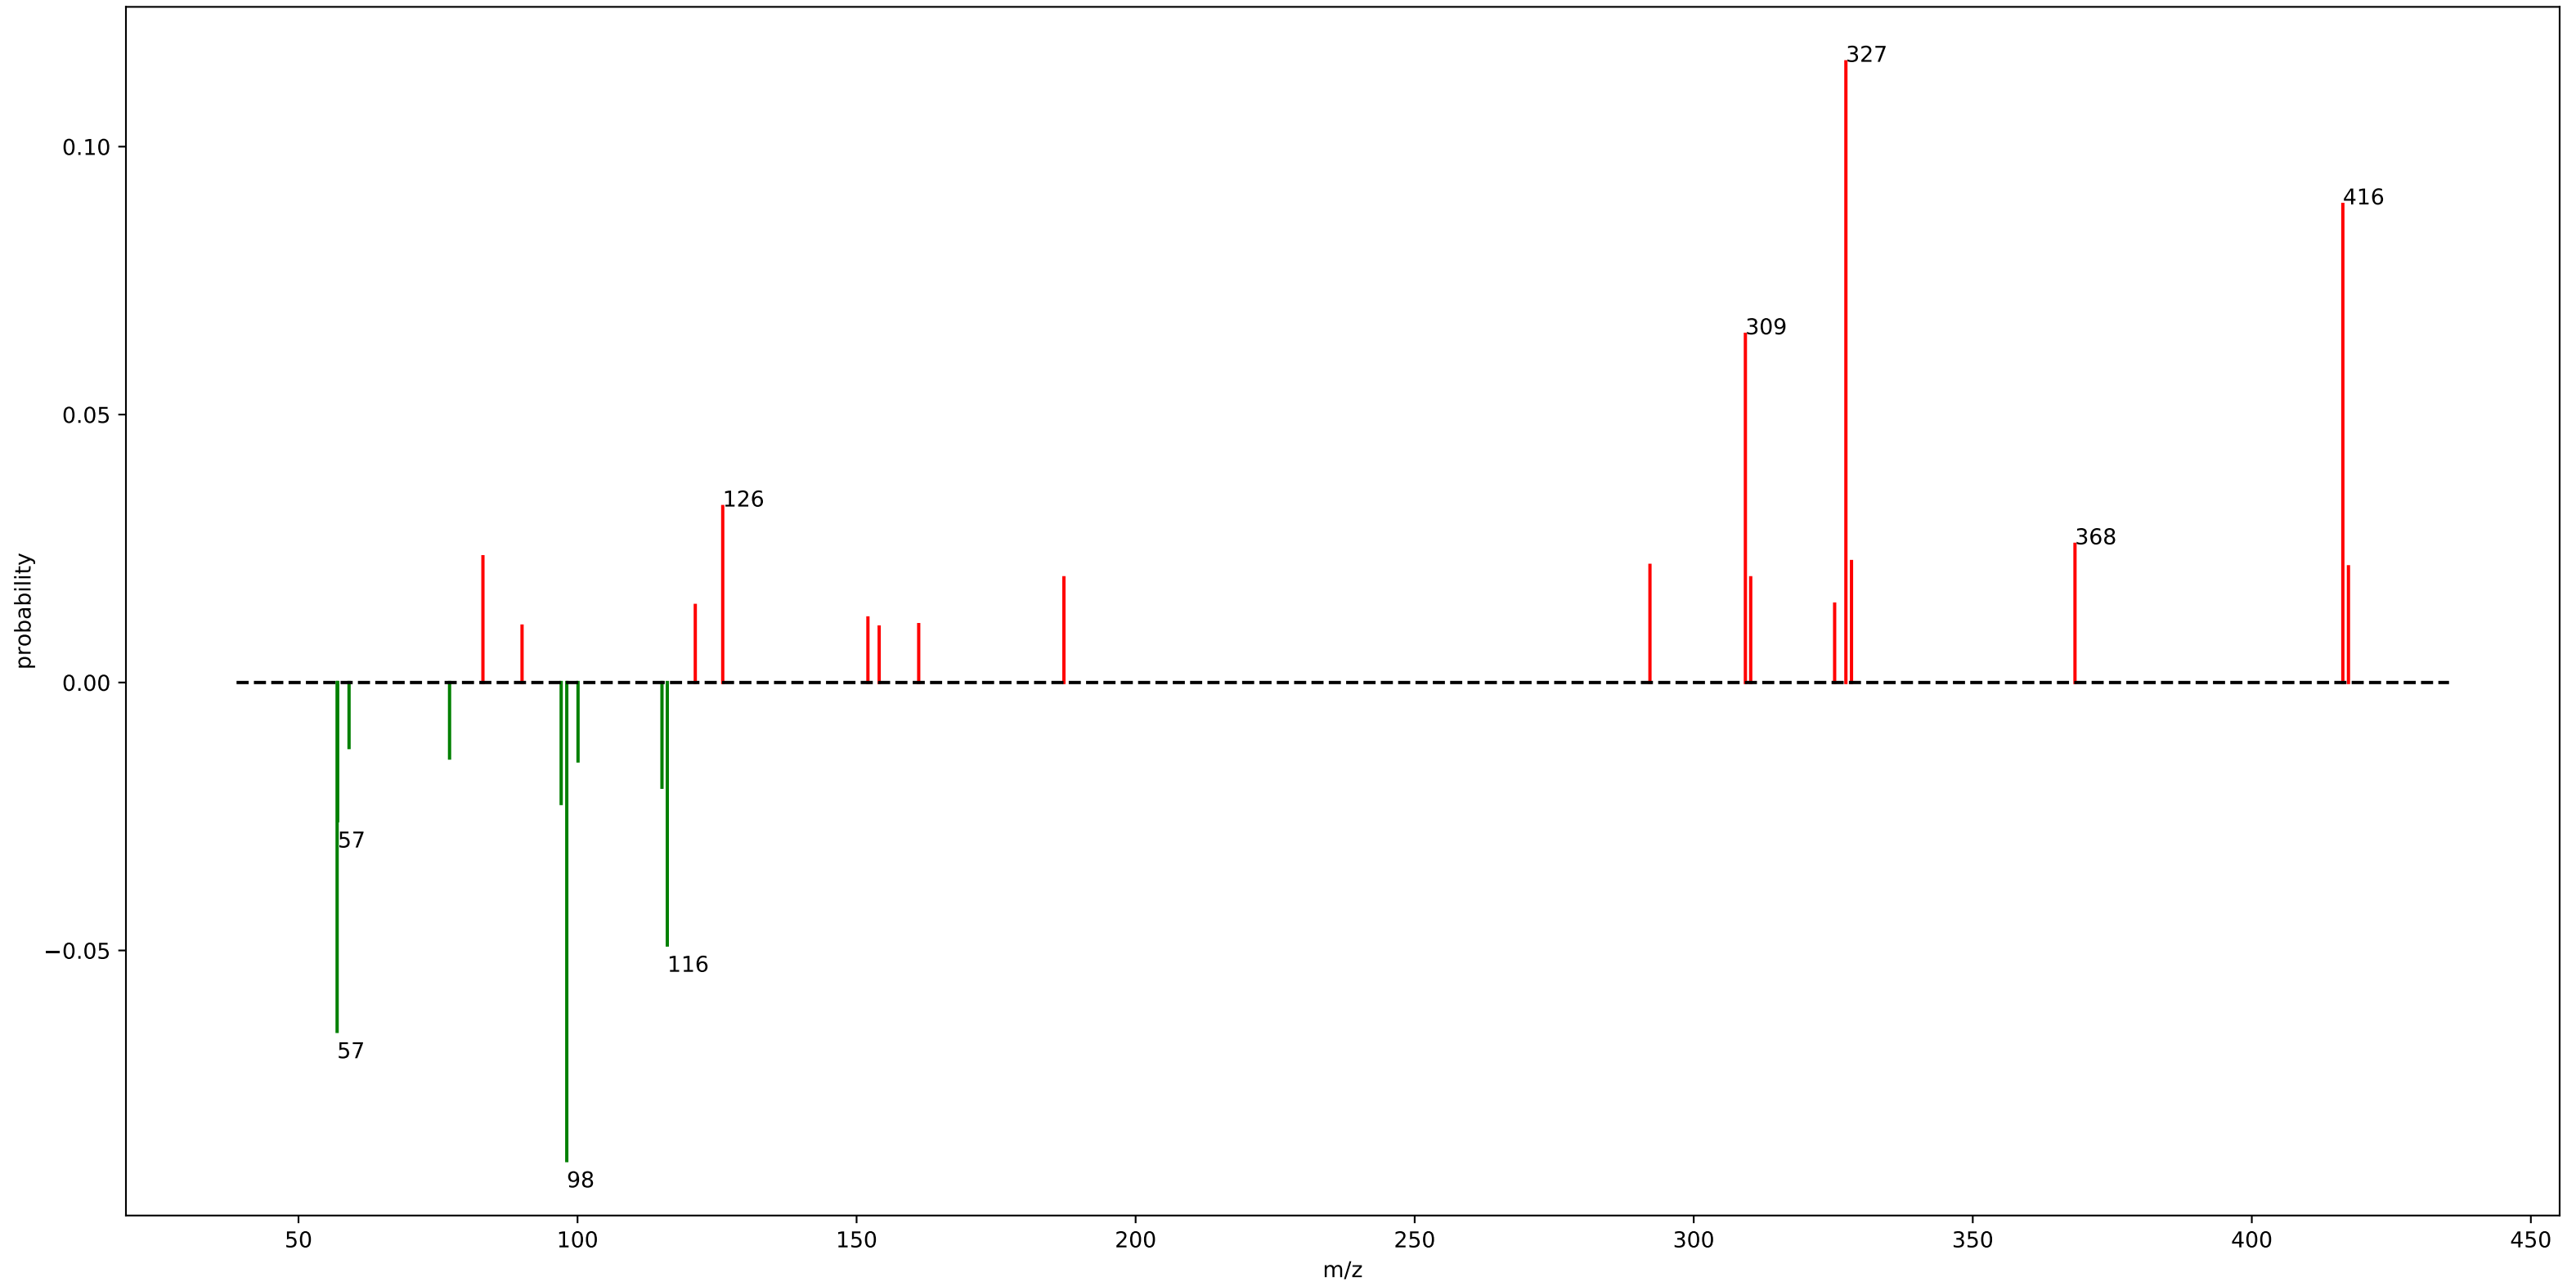

## motif\_539

|                   |        |                   |        |
|-------------------|--------|-------------------|--------|
| fragment_327.2675 | : 0.12 | loss_77.0675      | : 0.01 |
| loss_98.0725      | : 0.09 | loss_59.0575      | : 0.01 |
| fragment_416.3125 | : 0.09 | fragment_152.0325 | : 0.01 |
| loss_56.9225      | : 0.07 | fragment_161.1325 | : 0.01 |
| fragment_309.2575 | : 0.06 | fragment_90.0575  | : 0.01 |
| loss_116.0825     | : 0.05 | fragment_154.0475 | : 0.01 |
| fragment_126.0175 | : 0.03 |                   |        |
| fragment_368.3175 | : 0.03 |                   |        |
| loss_57.0225      | : 0.03 |                   |        |
| fragment_83.0475  | : 0.02 |                   |        |
| fragment_328.2725 | : 0.02 |                   |        |
| loss_97.0675      | : 0.02 |                   |        |
| fragment_292.1575 | : 0.02 |                   |        |
| fragment_417.3175 | : 0.02 |                   |        |
| fragment_310.2125 | : 0.02 |                   |        |
| loss_115.1275     | : 0.02 |                   |        |
| fragment_187.1475 | : 0.02 |                   |        |
| loss_100.0875     | : 0.01 |                   |        |
| fragment_325.2525 | : 0.01 |                   |        |
| fragment_121.0975 | : 0.01 |                   |        |

gnps\_motif\_46.m2m

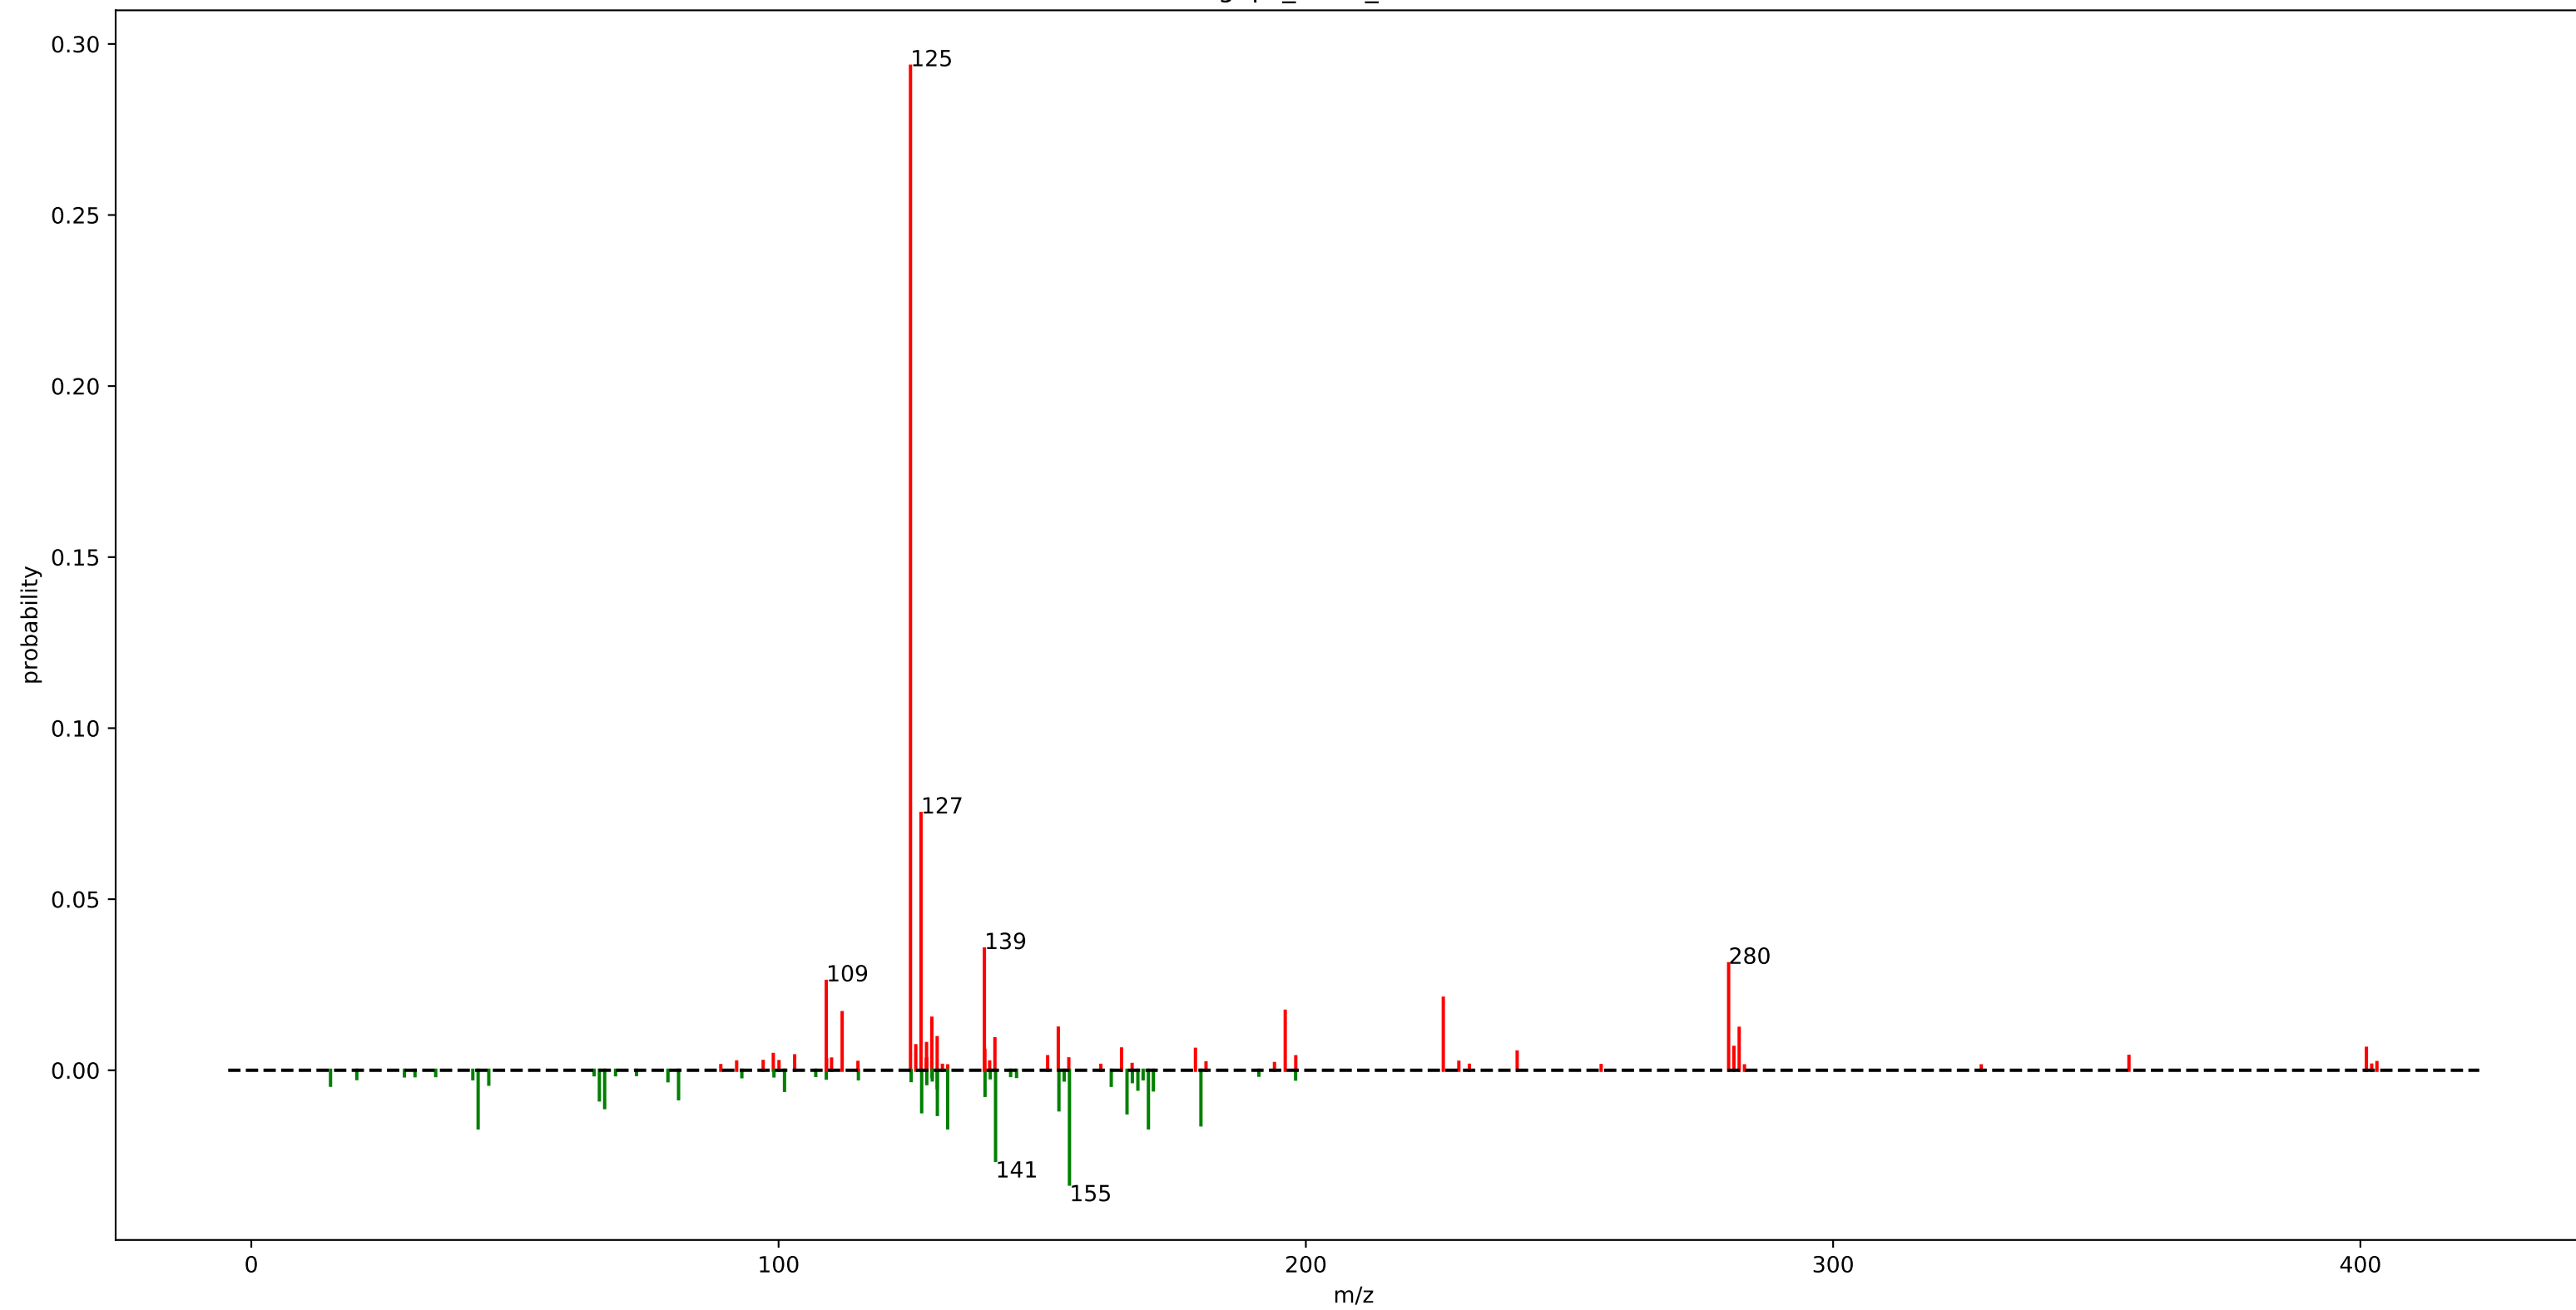

## gnps\_motif\_46.m2m

|                   |        |                   |        |
|-------------------|--------|-------------------|--------|
| fragment_125.0175 | : 0.29 | loss_153.1675     | : 0.01 |
| fragment_127.0125 | : 0.08 | loss_67.0175      | : 0.01 |
| fragment_139.0325 | : 0.04 | fragment_130.0775 | : 0.01 |
| loss_155.1675     | : 0.03 | fragment_141.0275 | : 0.01 |
| fragment_280.1825 | : 0.03 | loss_66.0125      | : 0.01 |
| loss_141.1525     | : 0.03 | loss_81.0325      | : 0.01 |
| fragment_109.0475 | : 0.03 | fragment_128.0625 | : 0.01 |
| fragment_226.0675 | : 0.02 | loss_139.1525     | : 0.01 |
| fragment_196.0875 | : 0.02 | fragment_126.0175 | : 0.01 |
| loss_132.0675     | : 0.02 | fragment_281.1875 | : 0.01 |
| fragment_112.0575 | : 0.02 | fragment_401.1425 | : 0.01 |
| loss_43.0175      | : 0.02 | fragment_165.0475 | : 0.01 |
| loss_170.1425     | : 0.02 | fragment_179.0625 | : 0.01 |
| loss_180.1025     | : 0.02 | loss_101.1225     | : 0.01 |
| fragment_129.0675 | : 0.02 | fragment_139.1225 | : 0.01 |
| loss_130.1125     | : 0.01 | loss_171.0825     | : 0.01 |
| loss_166.0825     | : 0.01 | loss_168.1425     | : 0.01 |
| fragment_153.0475 | : 0.01 | fragment_240.0775 | : 0.01 |
| fragment_282.1825 | : 0.01 | loss_130.0725     | : 0.01 |
| loss_127.1375     | : 0.01 |                   |        |

gnps\_motif\_16.m2m

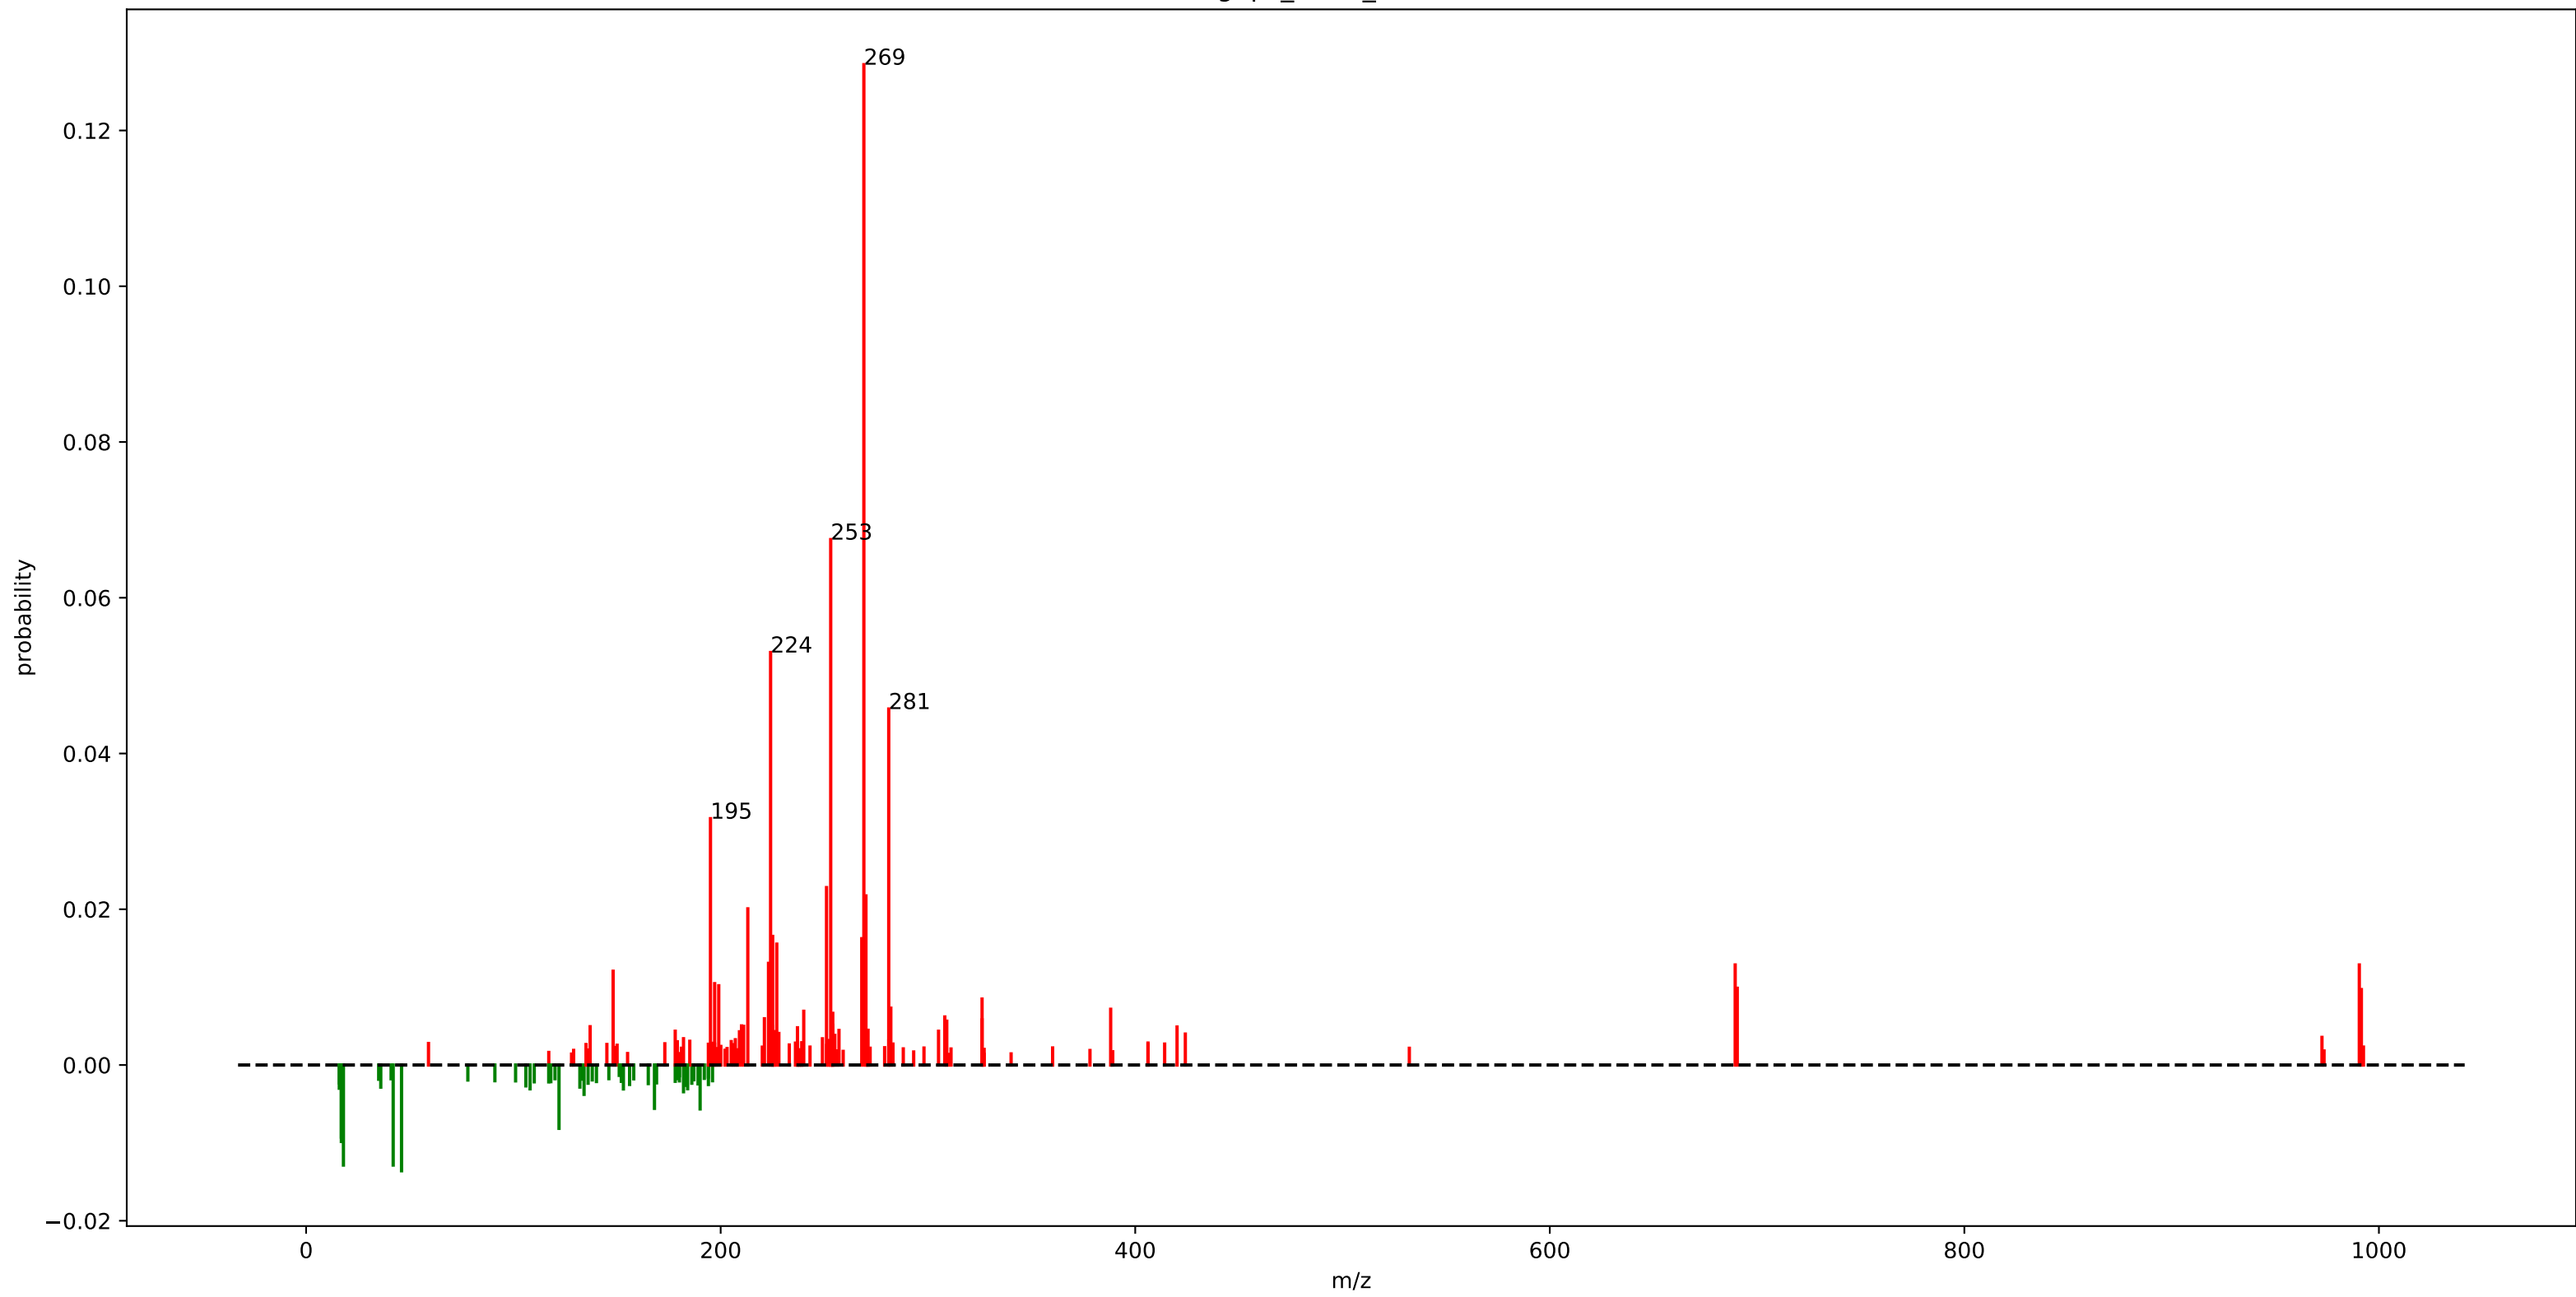

## gnps\_motif\_16.m2m

|                   |        |                   |        |
|-------------------|--------|-------------------|--------|
| fragment_269.0825 | : 0.13 | fragment_690.4425 | : 0.01 |
| fragment_253.0875 | : 0.07 | loss_17.0075      | : 0.01 |
| fragment_224.0825 | : 0.05 | fragment_991.5425 | : 0.01 |
| fragment_281.0825 | : 0.05 | loss_17.0025      | : 0.01 |
| fragment_195.0825 | : 0.03 | fragment_326.1075 | : 0.01 |
| fragment_251.0725 | : 0.02 | loss_122.0125     | : 0.01 |
| fragment_270.0875 | : 0.02 | fragment_282.0875 | : 0.01 |
| fragment_213.0925 | : 0.02 | fragment_388.1525 | : 0.01 |
| fragment_225.0925 | : 0.02 | fragment_240.0775 | : 0.01 |
| fragment_268.0725 | : 0.02 | fragment_254.0875 | : 0.01 |
| fragment_227.0725 | : 0.02 | fragment_308.1275 | : 0.01 |
| loss_46.0425      | : 0.01 | fragment_221.0975 | : 0.01 |
| fragment_223.0775 | : 0.01 | fragment_326.1025 | : 0.01 |
| fragment_689.4475 | : 0.01 | loss_190.0825     | : 0.01 |
| fragment_990.5425 | : 0.01 | fragment_309.0775 | : 0.01 |
| loss_18.0075      | : 0.01 | loss_168.0625     | : 0.01 |
| loss_42.0075      | : 0.01 | fragment_254.0575 | : 0.01 |
| fragment_148.1125 | : 0.01 | fragment_210.0675 | : 0.01 |
| fragment_197.0975 | : 0.01 |                   |        |
| fragment_199.0775 | : 0.01 |                   |        |

gnps\_motif\_367.m2m

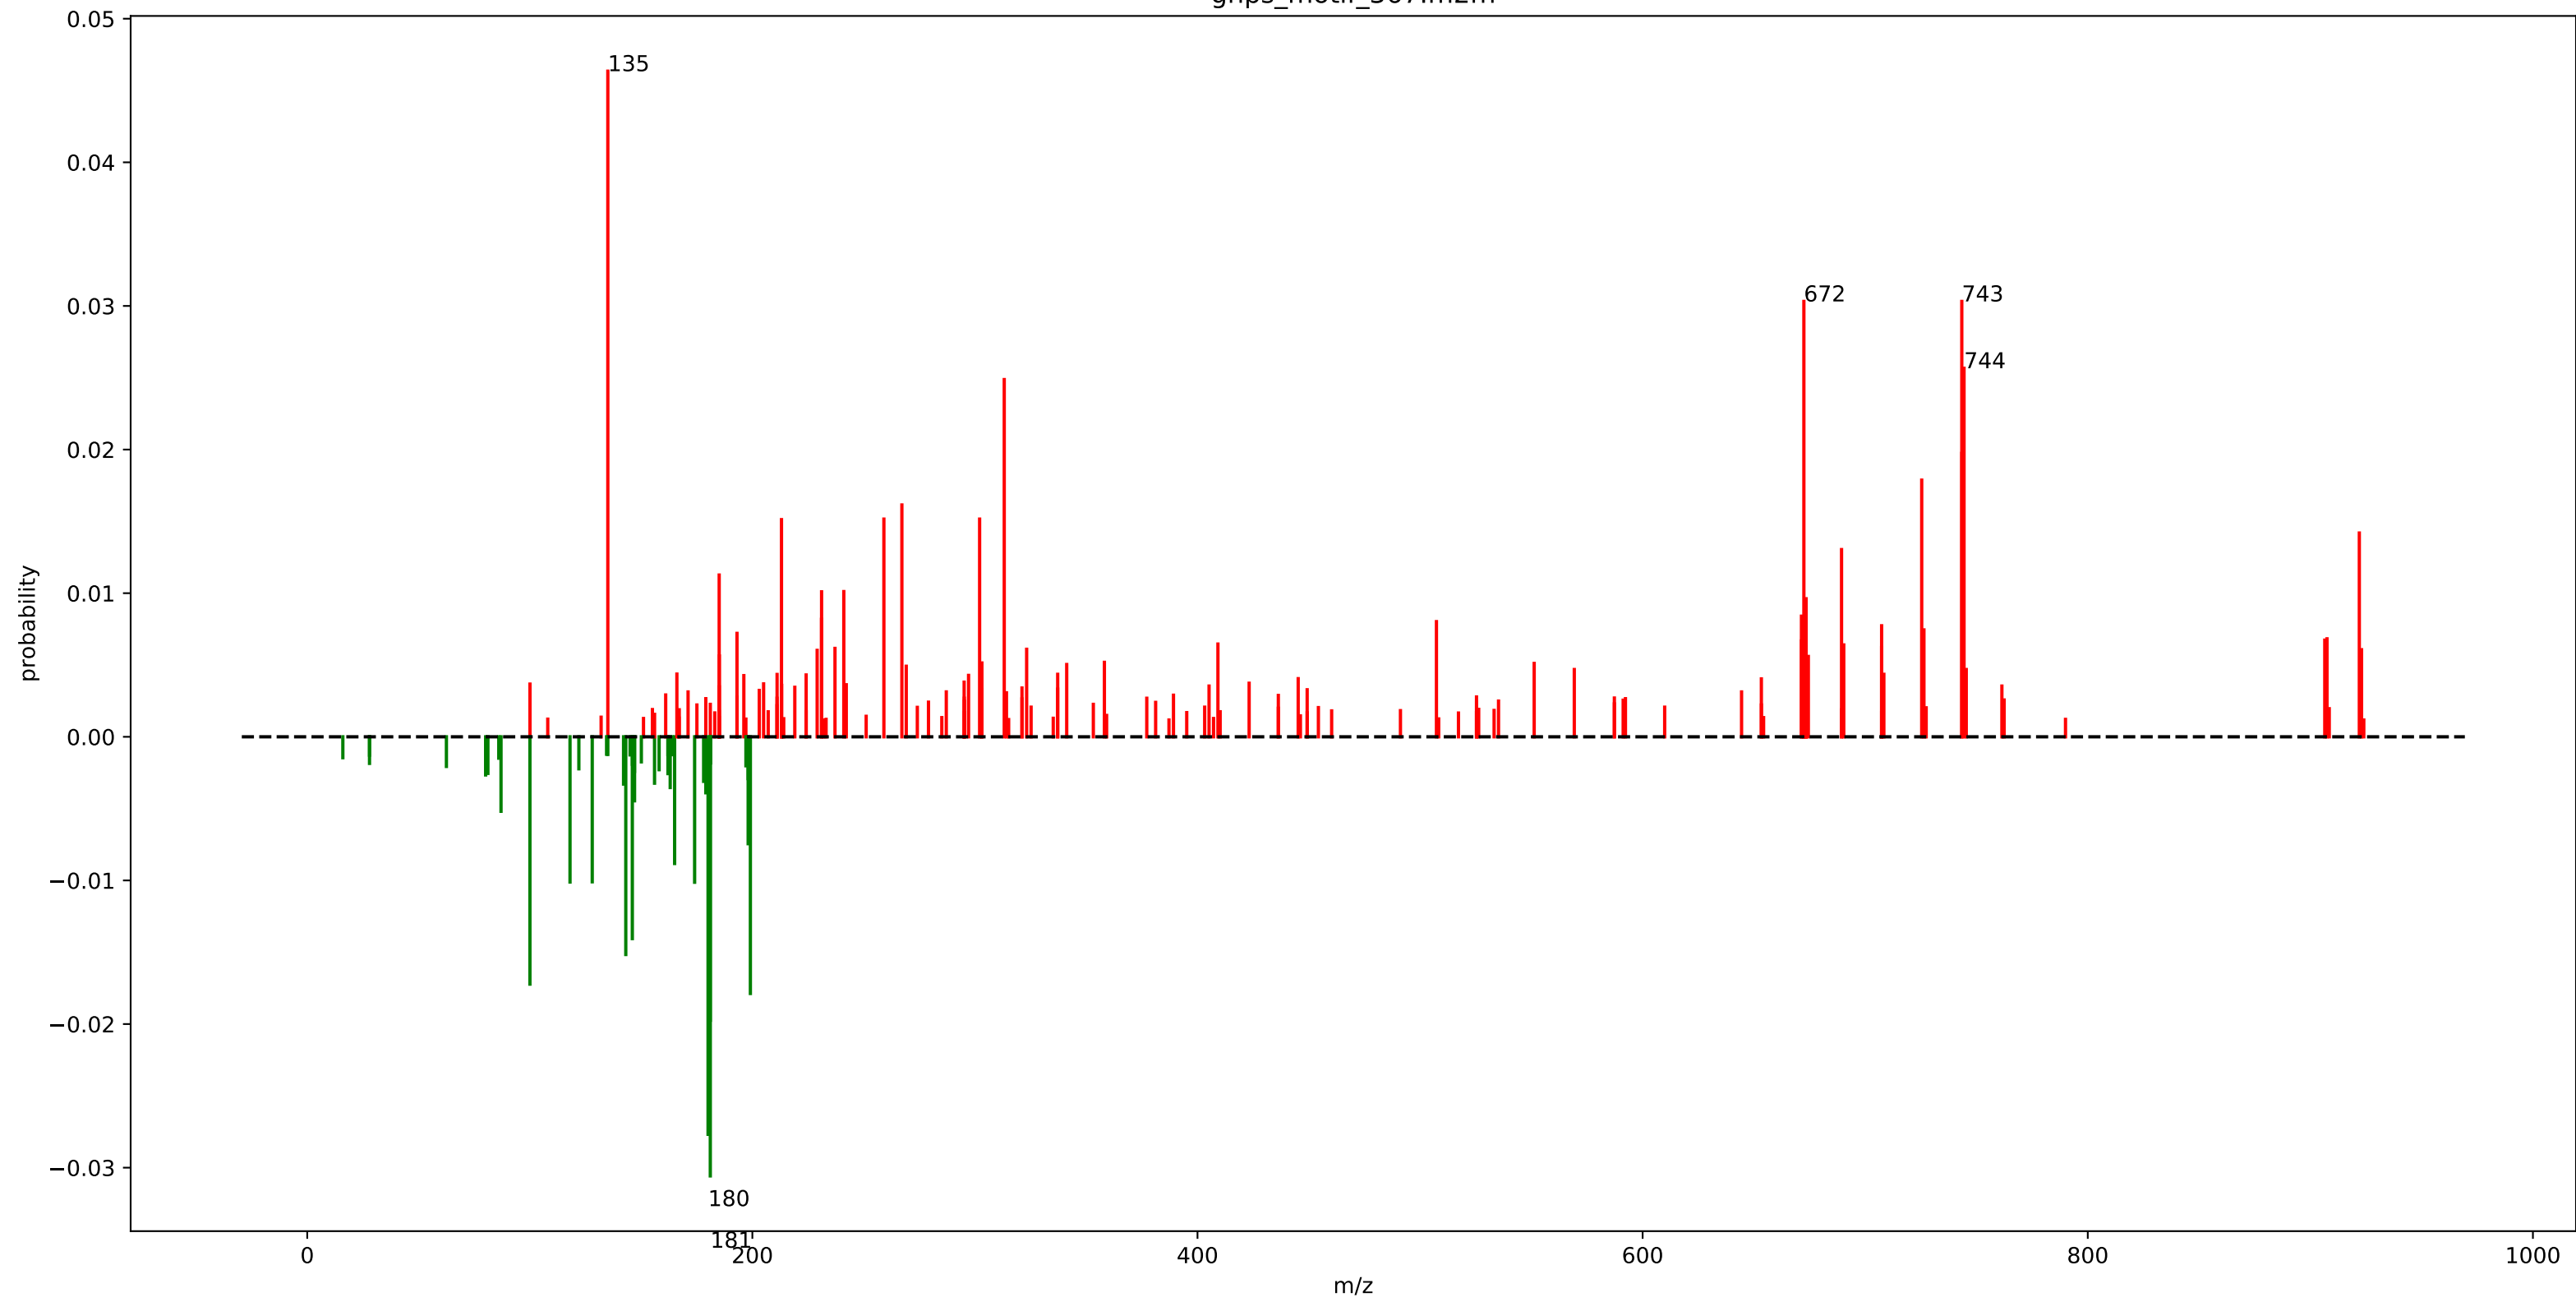

# gnps\_motif\_367.m2m

|                   |        |                   |        |                   |        |
|-------------------|--------|-------------------|--------|-------------------|--------|
| fragment_135.0575 | : 0.05 | fragment_185.0925 | : 0.01 | fragment_690.3675 | : 0.01 |
| loss_181.0975     | : 0.03 | loss_174.0575     | : 0.01 | fragment_673.4425 | : 0.01 |
| fragment_672.4425 | : 0.03 | fragment_241.0825 | : 0.01 | fragment_707.3725 | : 0.01 |
| fragment_743.3975 | : 0.03 | loss_118.0675     | : 0.01 | fragment_237.1225 | : 0.01 |
| loss_180.0925     | : 0.03 | fragment_231.0975 | : 0.01 | fragment_323.2375 | : 0.01 |
| fragment_744.4025 | : 0.03 | loss_128.0525     | : 0.01 | fragment_923.0125 | : 0.01 |
| fragment_313.1675 | : 0.02 | fragment_673.4375 | : 0.01 | fragment_229.1125 | : 0.01 |
| fragment_743.4025 | : 0.02 | loss_165.0725     | : 0.01 | fragment_185.1675 | : 0.01 |
| loss_181.0925     | : 0.02 | fragment_671.3525 | : 0.01 | fragment_674.4475 | : 0.01 |
| fragment_725.3875 | : 0.02 | fragment_231.0675 | : 0.01 | fragment_358.1675 | : 0.01 |
| loss_199.1075     | : 0.02 | fragment_507.3575 | : 0.01 | loss_87.0675      | : 0.01 |
| loss_100.0575     | : 0.02 | fragment_707.3775 | : 0.01 | fragment_303.1275 | : 0.01 |
| fragment_267.1775 | : 0.02 | loss_198.1075     | : 0.01 | fragment_551.2725 | : 0.01 |
| loss_143.1275     | : 0.02 | fragment_726.3875 | : 0.01 | fragment_341.2375 | : 0.01 |
| fragment_302.1025 | : 0.02 | fragment_193.0925 | : 0.01 |                   |        |
| fragment_259.0925 | : 0.02 | fragment_672.3575 | : 0.01 |                   |        |
| fragment_213.0875 | : 0.02 | fragment_907.4875 | : 0.01 |                   |        |
| fragment_922.0075 | : 0.01 | fragment_906.4875 | : 0.01 |                   |        |
| loss_146.0625     | : 0.01 | fragment_671.3575 | : 0.01 |                   |        |
| fragment_689.3675 | : 0.01 | fragment_409.1775 | : 0.01 |                   |        |



urine\_mass2motif\_229.m2m

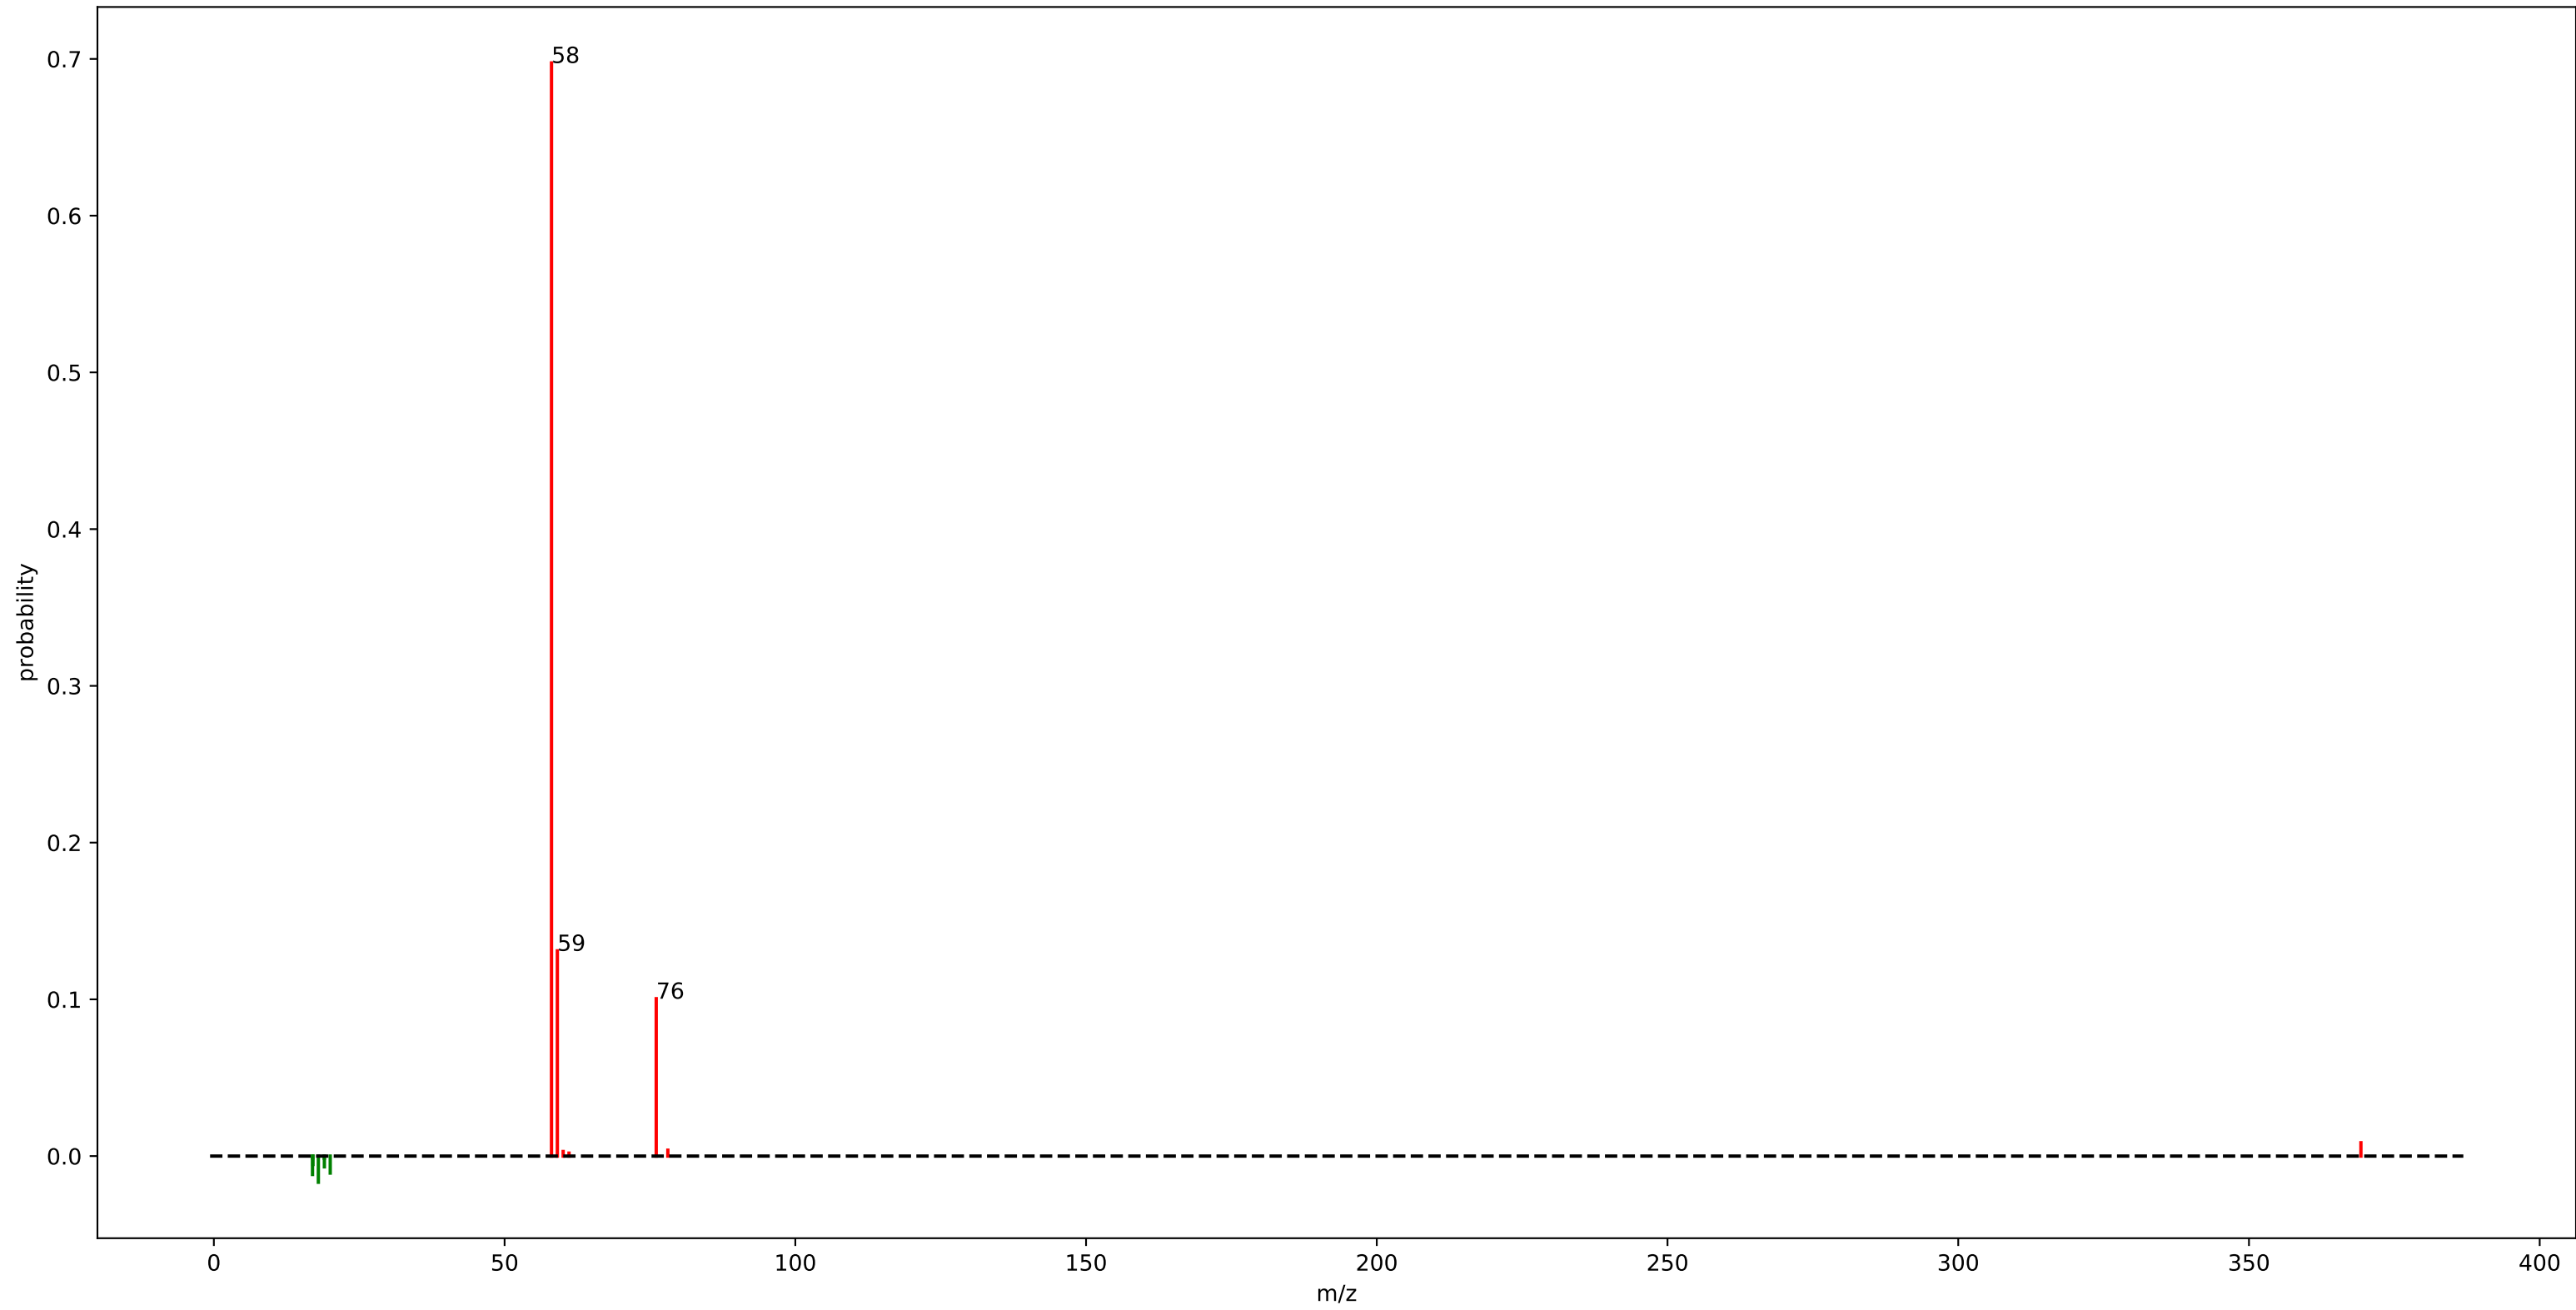

## urine\_mass2motif\_229.m2m

|                   |        |
|-------------------|--------|
| fragment_58.0675  | : 0.70 |
| fragment_59.0725  | : 0.13 |
| fragment_76.0775  | : 0.10 |
| loss_17.9725      | : 0.02 |
| loss_16.9675      | : 0.01 |
| loss_20.0125      | : 0.01 |
| fragment_369.2525 | : 0.01 |
| loss_19.0075      | : 0.01 |
| loss_17.0375      | : 0.01 |

mb\_motif\_4.m2m

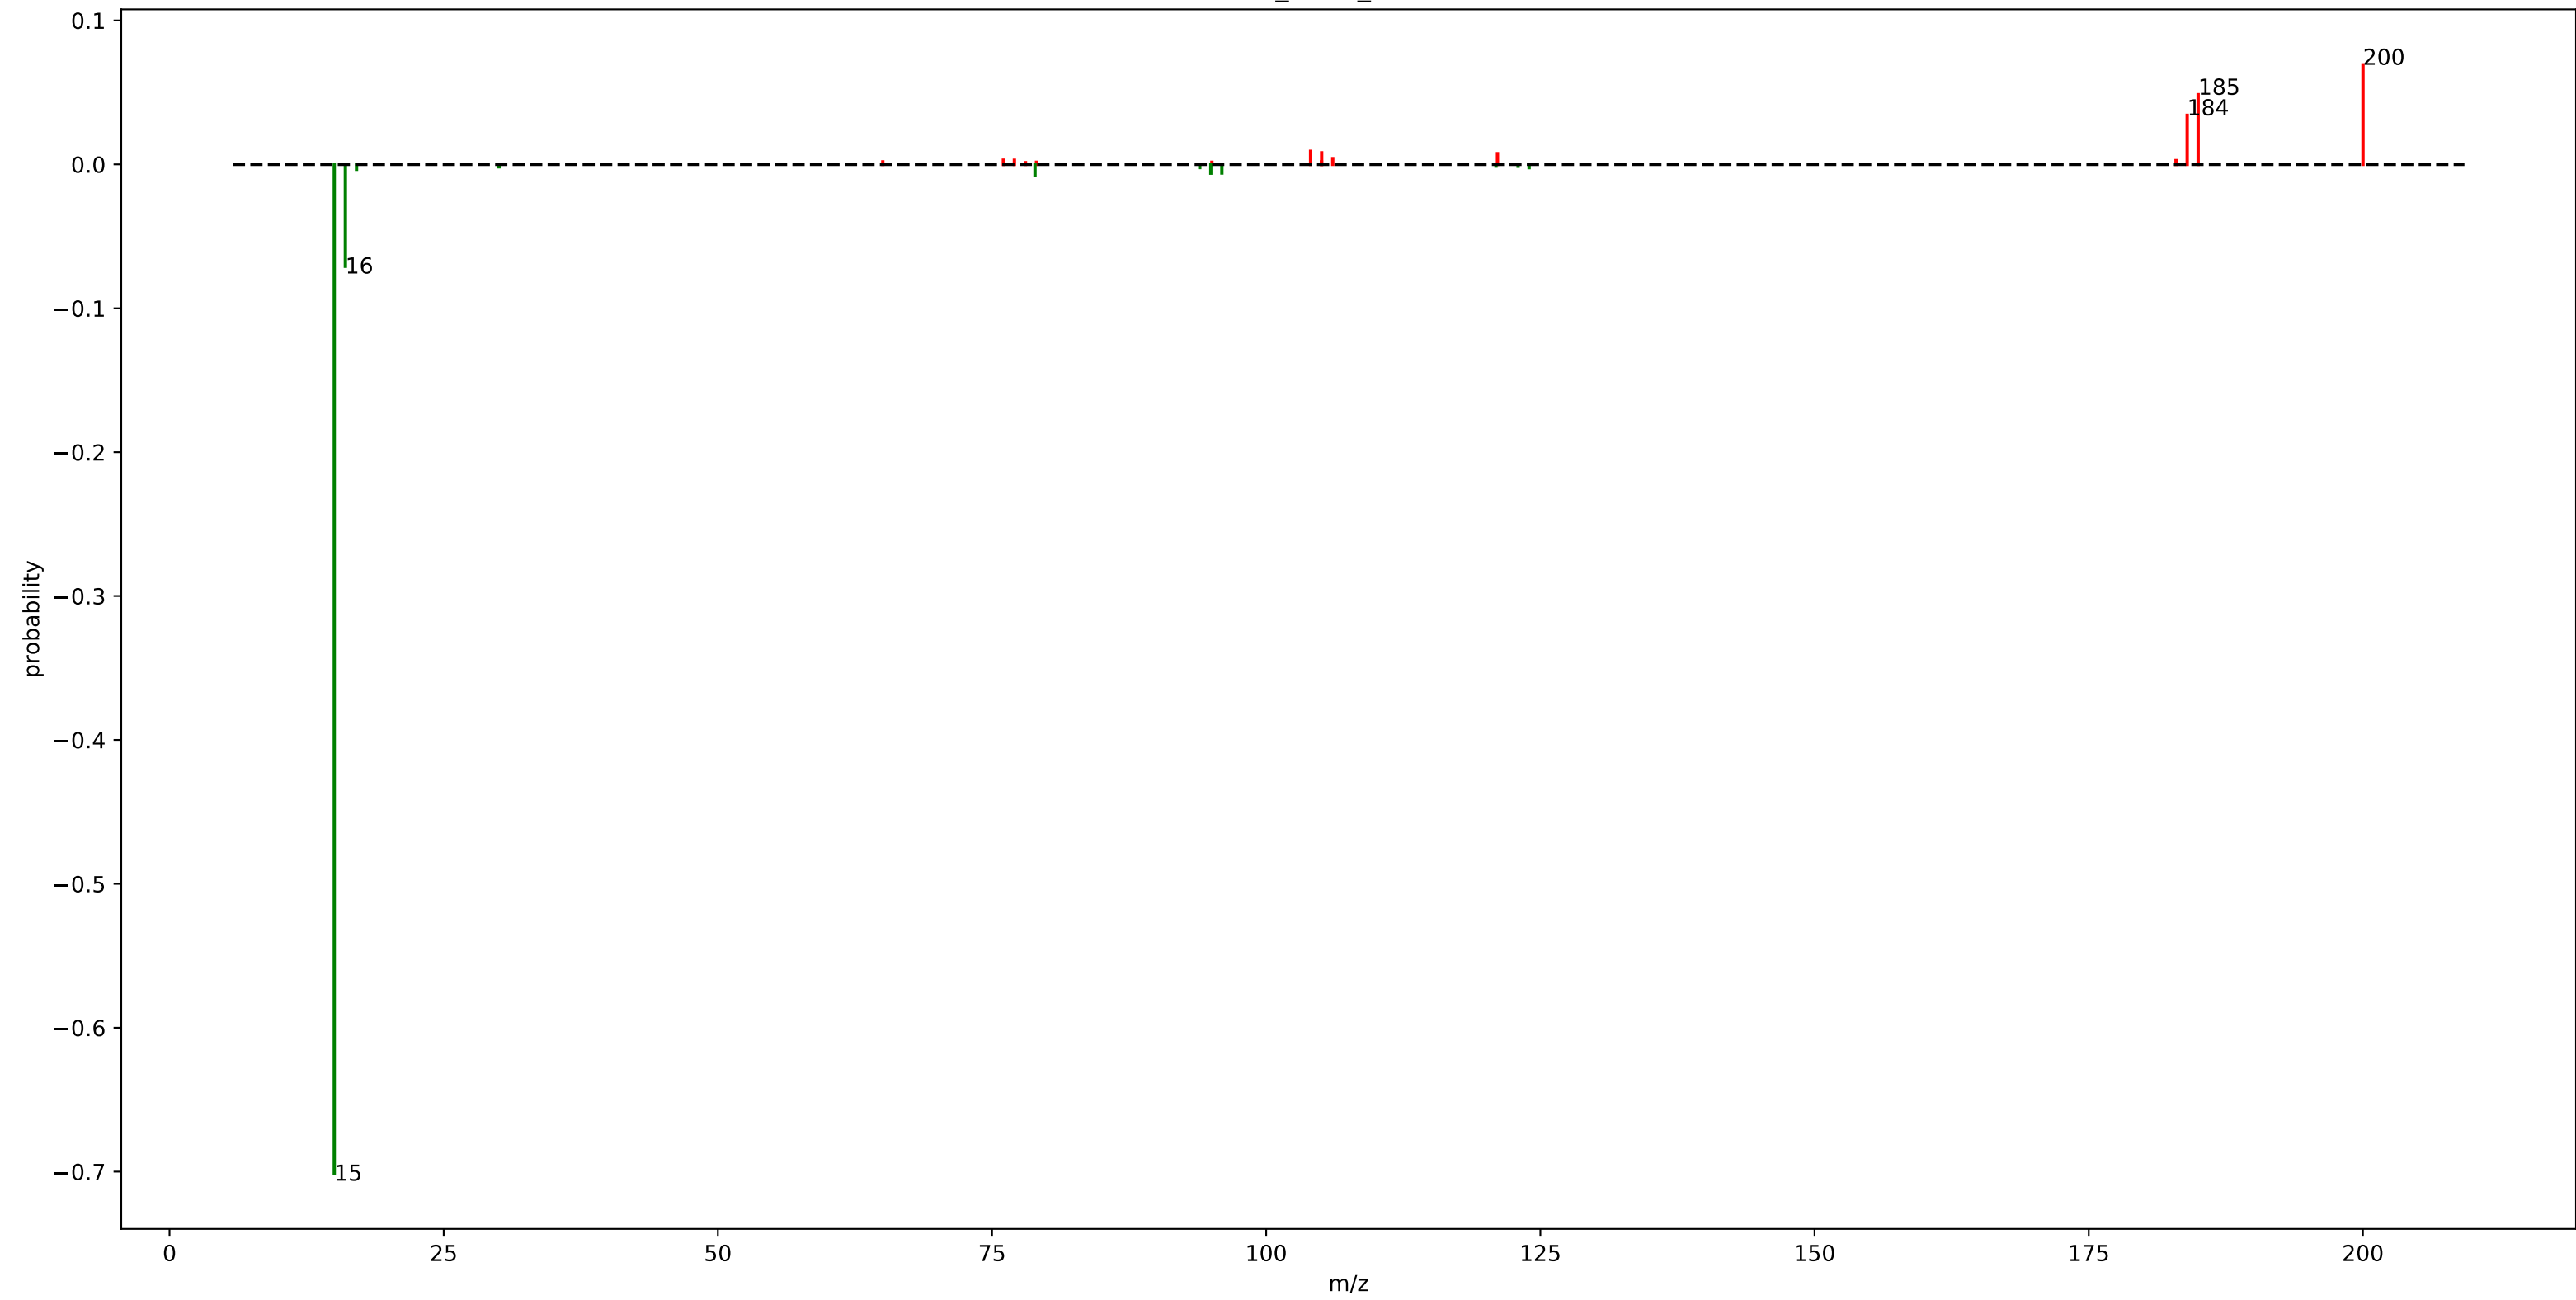

## mb\_motif\_4.m2m

|                   |        |
|-------------------|--------|
| loss_15.0225      | : 0.70 |
| loss_16.0325      | : 0.07 |
| fragment_200.0075 | : 0.07 |
| fragment_184.9775 | : 0.05 |
| fragment_183.9775 | : 0.03 |
| fragment_104.0475 | : 0.01 |
| fragment_105.0575 | : 0.01 |
| loss_78.9175      | : 0.01 |
| fragment_121.0875 | : 0.01 |
| loss_94.9475      | : 0.01 |
| loss_95.9575      | : 0.01 |

rhamn\_motif\_3.m2m

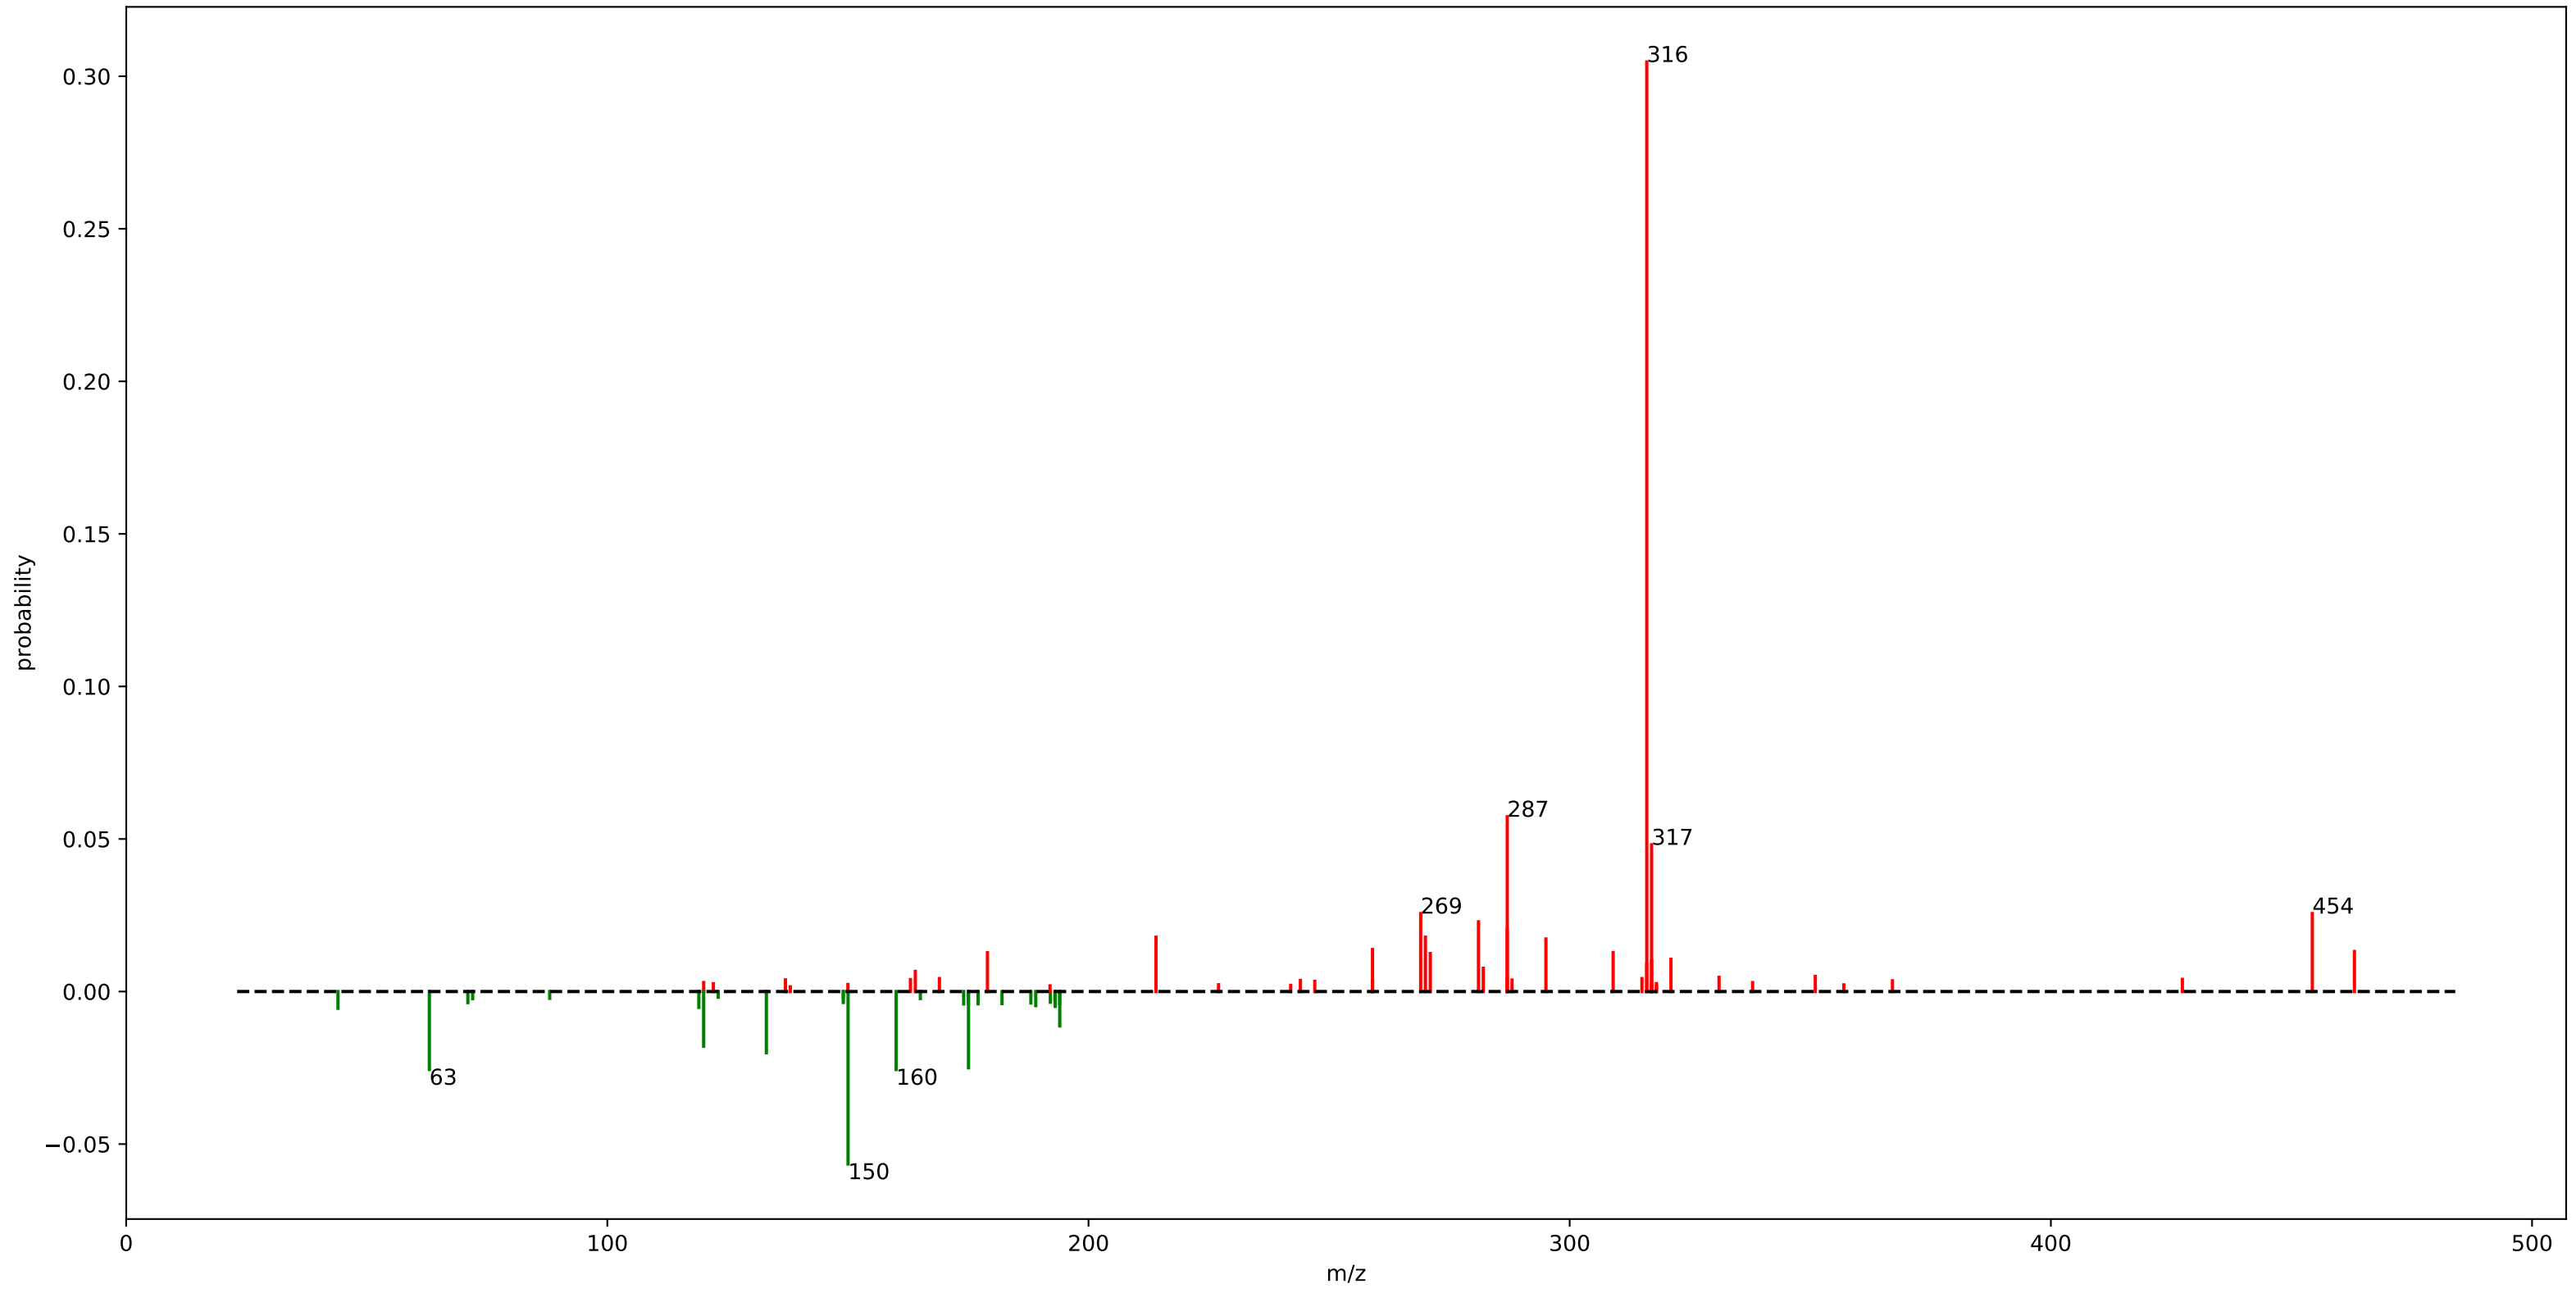

# rhamn\_motif\_3.m2m

|                   |        |                   |        |
|-------------------|--------|-------------------|--------|
| fragment_316.0225 | : 0.30 | fragment_271.0325 | : 0.01 |
| fragment_287.0225 | : 0.06 | loss_194.0225     | : 0.01 |
| loss_150.0275     | : 0.06 | fragment_321.0425 | : 0.01 |
| fragment_317.0275 | : 0.05 | fragment_317.0225 | : 0.01 |
| loss_63.0125      | : 0.03 | fragment_316.0125 | : 0.01 |
| fragment_454.3375 | : 0.03 | fragment_282.0525 | : 0.01 |
| fragment_269.0375 | : 0.03 | fragment_164.0075 | : 0.01 |
| loss_160.0225     | : 0.03 | loss_44.0225      | : 0.01 |
| loss_175.0575     | : 0.02 | loss_119.0175     | : 0.01 |
| fragment_281.0475 | : 0.02 |                   |        |
| fragment_287.0175 | : 0.02 |                   |        |
| loss_133.0525     | : 0.02 |                   |        |
| loss_120.0175     | : 0.02 |                   |        |
| fragment_270.0175 | : 0.02 |                   |        |
| fragment_214.0275 | : 0.02 |                   |        |
| fragment_295.0625 | : 0.02 |                   |        |
| fragment_259.0225 | : 0.01 |                   |        |
| fragment_463.0875 | : 0.01 |                   |        |
| fragment_309.0325 | : 0.01 |                   |        |
| fragment_178.9975 | : 0.01 |                   |        |

StrepSalini\_motif\_259.m2m

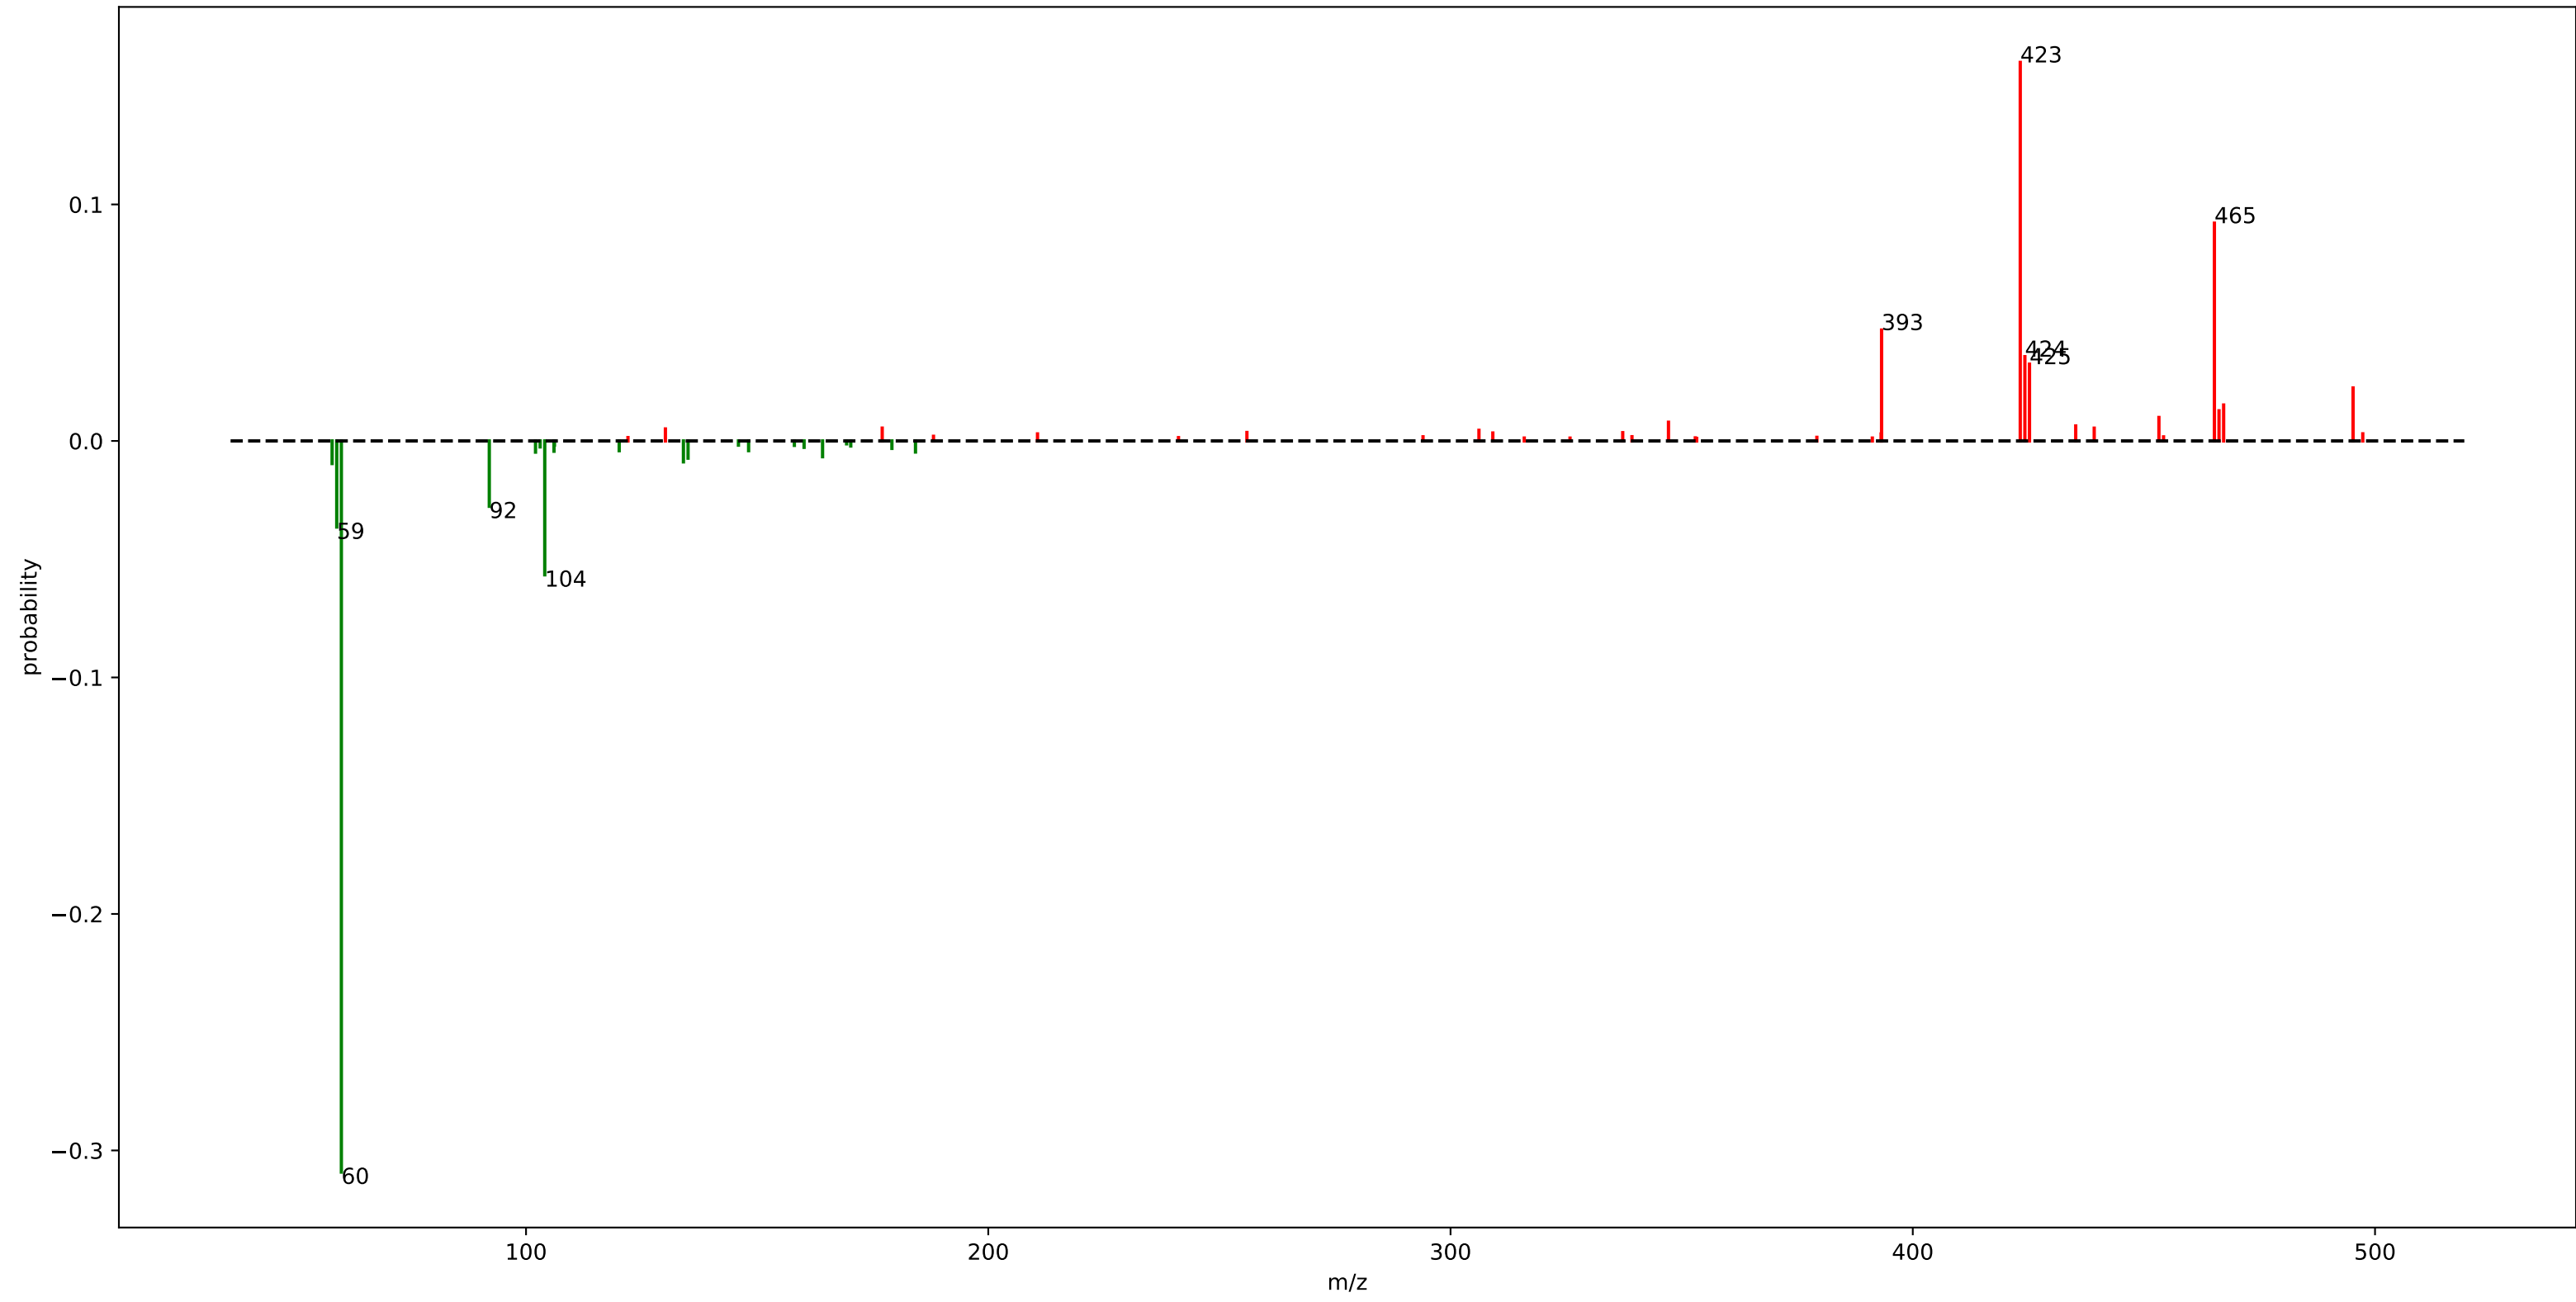

## StrepSalini\_motif\_259.m2m

|                   |        |                   |        |
|-------------------|--------|-------------------|--------|
| loss_60.0500      | : 0.31 | fragment_439.2500 | : 0.01 |
| fragment_423.2500 | : 0.16 | fragment_130.1500 | : 0.01 |
| fragment_465.2500 | : 0.09 |                   |        |
| loss_104.0500     | : 0.06 |                   |        |
| fragment_393.2500 | : 0.05 |                   |        |
| loss_59.0500      | : 0.04 |                   |        |
| fragment_424.2500 | : 0.04 |                   |        |
| fragment_425.2500 | : 0.03 |                   |        |
| loss_92.0500      | : 0.03 |                   |        |
| fragment_495.2500 | : 0.02 |                   |        |
| fragment_467.2500 | : 0.02 |                   |        |
| fragment_466.2500 | : 0.01 |                   |        |
| fragment_453.2500 | : 0.01 |                   |        |
| loss_58.0475      | : 0.01 |                   |        |
| loss_134.0500     | : 0.01 |                   |        |
| fragment_347.1500 | : 0.01 |                   |        |
| loss_135.0500     | : 0.01 |                   |        |
| loss_164.1500     | : 0.01 |                   |        |
| fragment_435.2500 | : 0.01 |                   |        |
| fragment_177.0525 | : 0.01 |                   |        |



urine\_mass2motif\_169.m2m

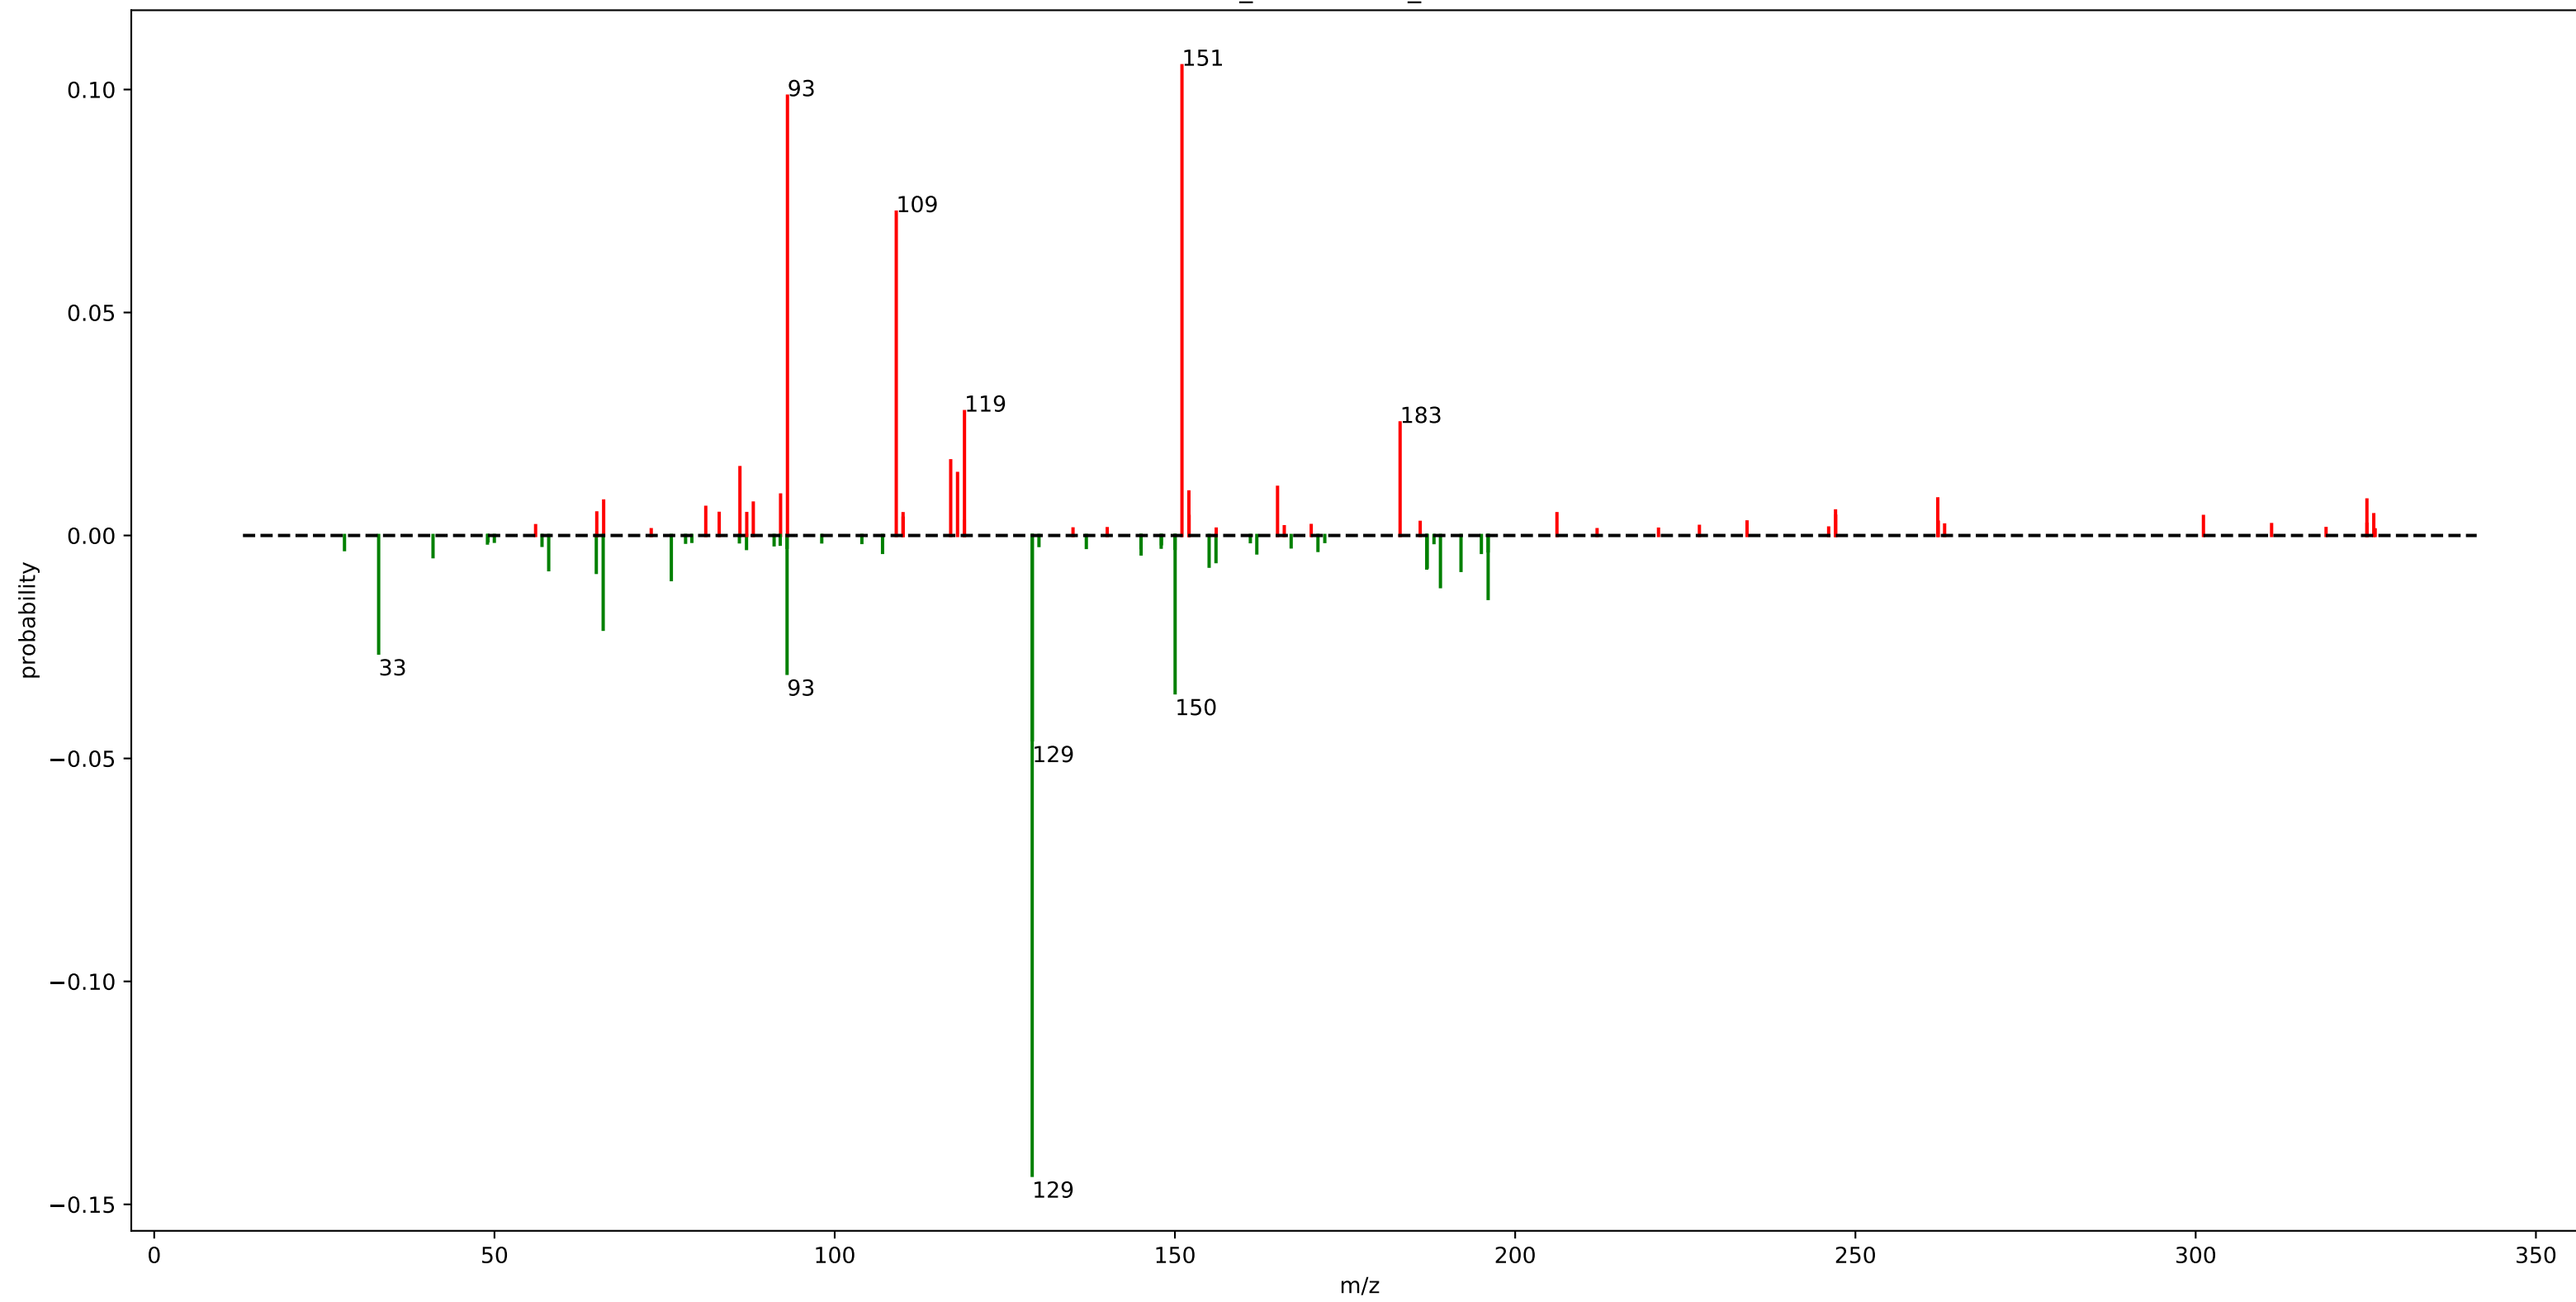

# urine\_mass2motif\_169.m2m

|                   |        |                   |        |
|-------------------|--------|-------------------|--------|
| loss_129.0225     | : 0.14 | loss_64.9675      | : 0.01 |
| fragment_151.0325 | : 0.11 | fragment_262.1025 | : 0.01 |
| fragment_93.0575  | : 0.10 | fragment_325.1675 | : 0.01 |
| fragment_109.0475 | : 0.07 | loss_192.0375     | : 0.01 |
| loss_129.0425     | : 0.05 | fragment_66.0475  | : 0.01 |
| loss_150.0275     | : 0.04 | loss_57.9725      | : 0.01 |
| loss_93.0025      | : 0.03 | loss_187.0075     | : 0.01 |
| fragment_119.0725 | : 0.03 | fragment_88.0375  | : 0.01 |
| loss_32.9825      | : 0.03 | loss_187.0725     | : 0.01 |
| fragment_183.0875 | : 0.03 | loss_155.0225     | : 0.01 |
| loss_65.9775      | : 0.02 | fragment_81.0525  | : 0.01 |
| fragment_117.0475 | : 0.02 | loss_156.0325     | : 0.01 |
| fragment_86.0725  | : 0.02 | fragment_247.0775 | : 0.01 |
| loss_196.0275     | : 0.01 | fragment_65.0375  | : 0.01 |
| fragment_118.0525 | : 0.01 |                   |        |
| loss_189.0175     | : 0.01 |                   |        |
| fragment_165.0775 | : 0.01 |                   |        |
| loss_75.9925      | : 0.01 |                   |        |
| fragment_152.0525 | : 0.01 |                   |        |
| fragment_92.0475  | : 0.01 |                   |        |

euphorbia\_motif\_192.m2m

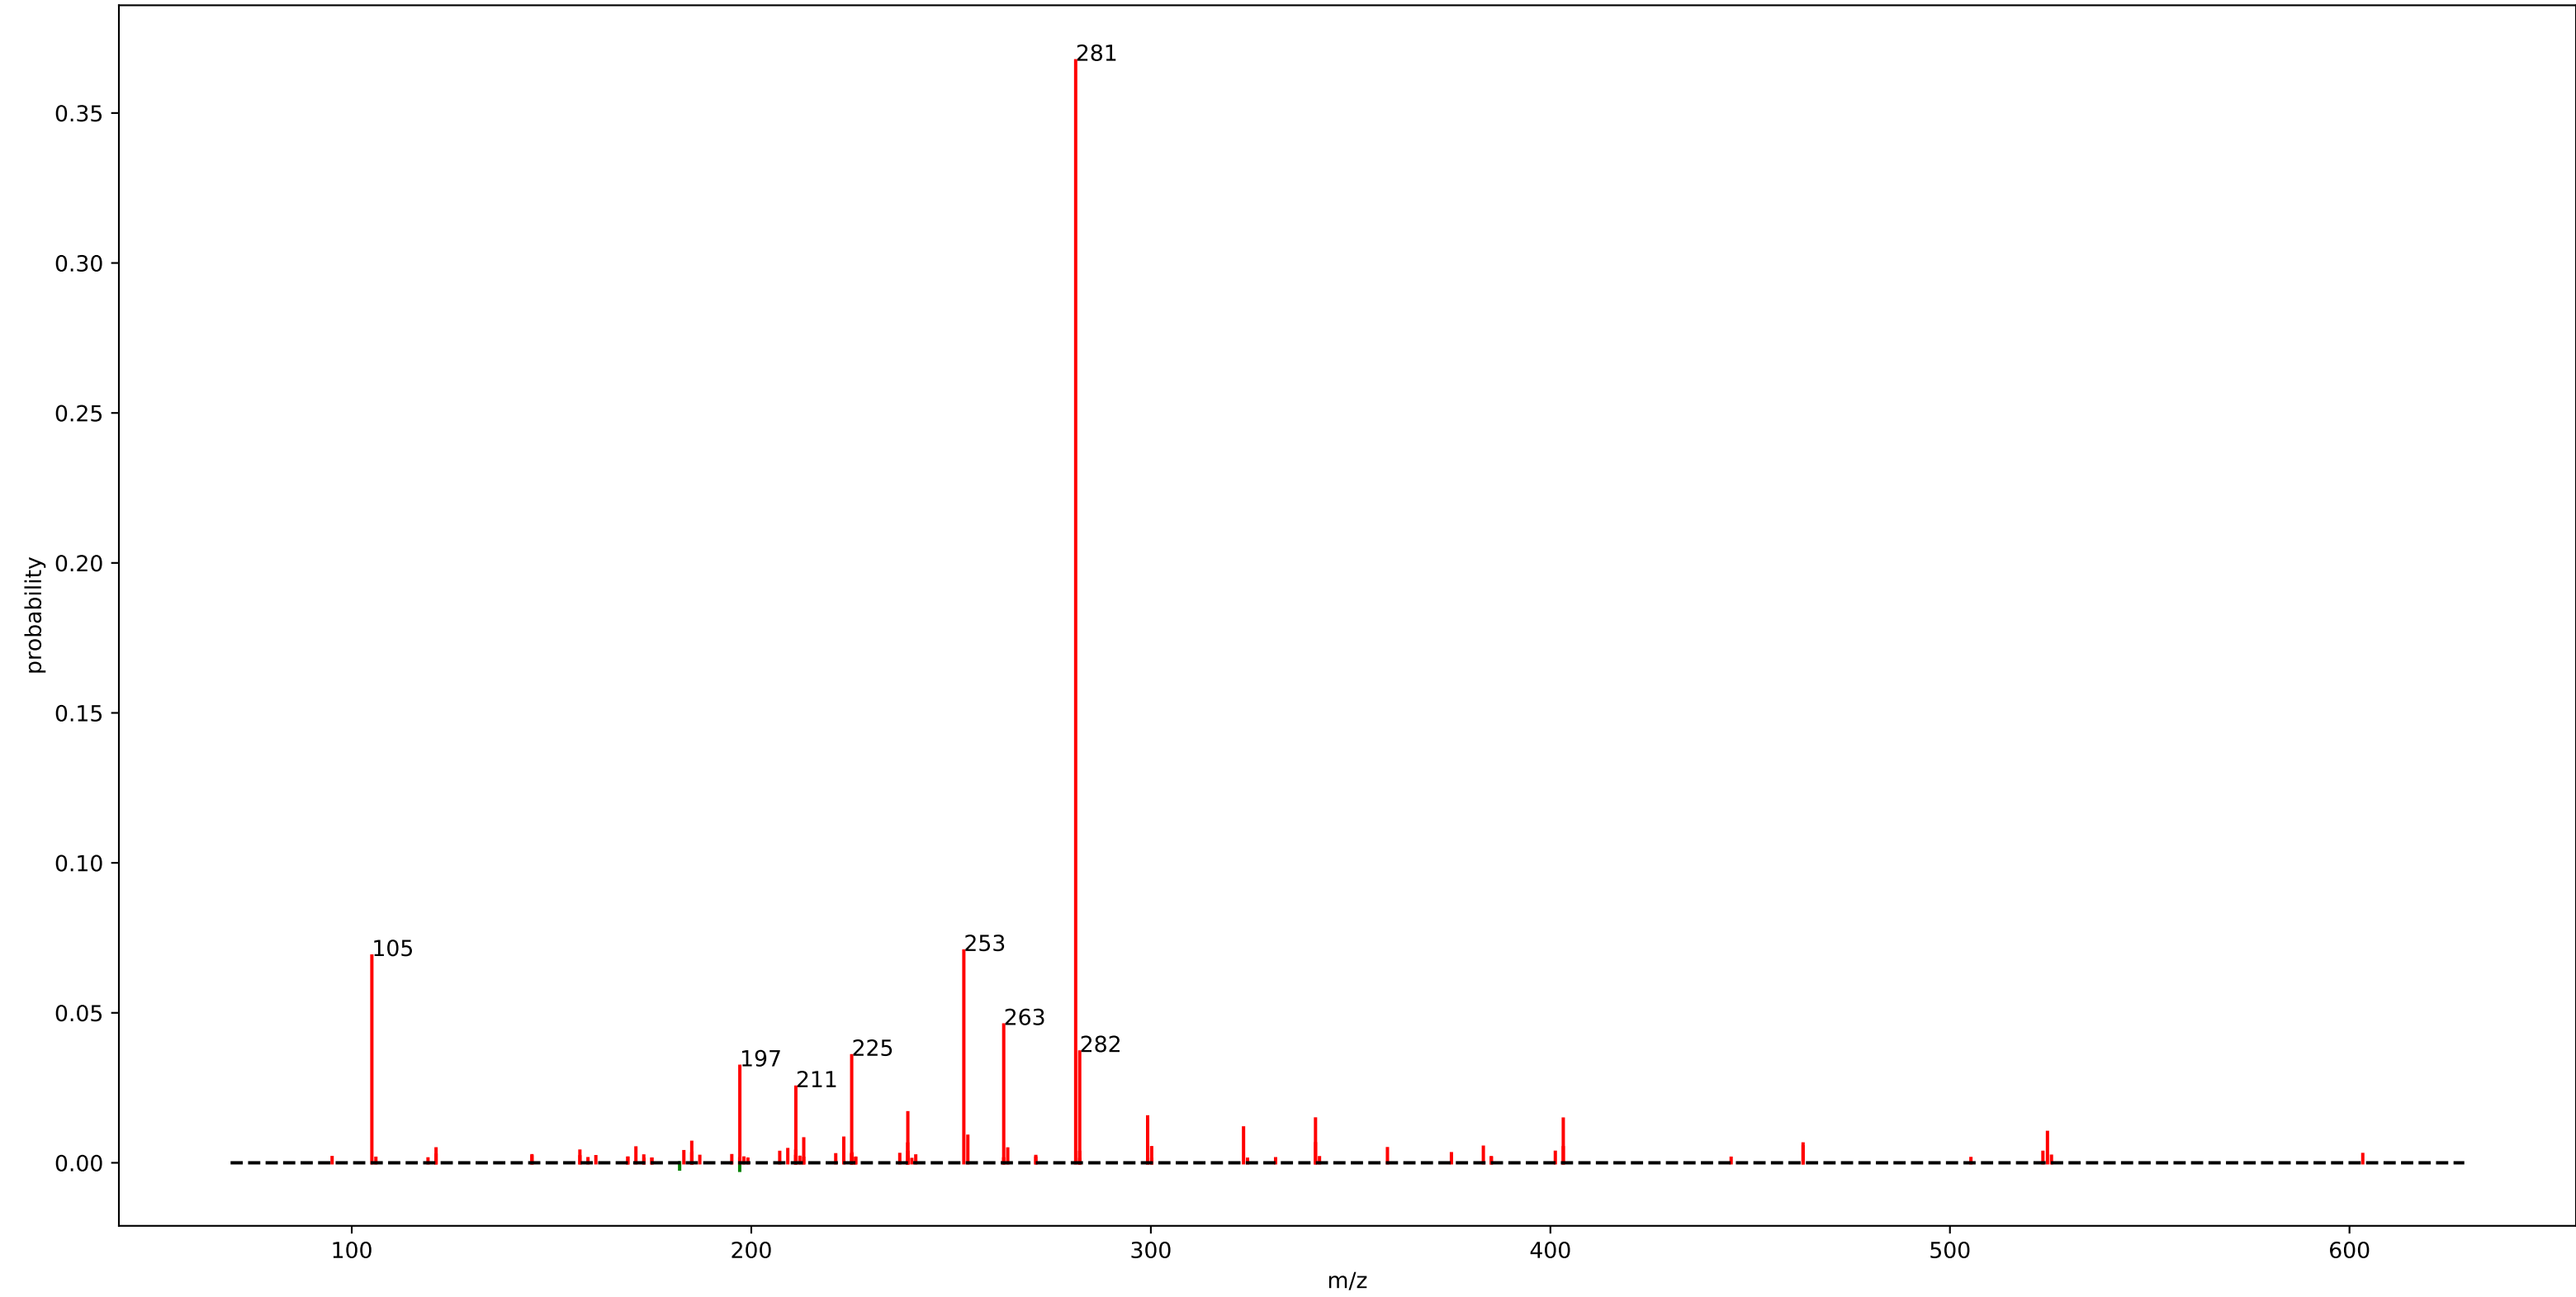

# euphorbia\_motif\_192.m2m

|                   |        |                   |        |
|-------------------|--------|-------------------|--------|
| fragment_281.1875 | : 0.37 | fragment_463.2425 | : 0.01 |
| fragment_253.1925 | : 0.07 | fragment_239.1425 | : 0.01 |
| fragment_105.0325 | : 0.07 | fragment_463.2475 | : 0.01 |
| fragment_263.1775 | : 0.05 | fragment_383.2225 | : 0.01 |
| fragment_282.1925 | : 0.04 | fragment_300.2025 | : 0.01 |
| fragment_225.1275 | : 0.04 | fragment_403.2225 | : 0.01 |
| fragment_197.1325 | : 0.03 |                   |        |
| fragment_211.1475 | : 0.03 |                   |        |
| fragment_239.1775 | : 0.02 |                   |        |
| fragment_299.1975 | : 0.02 |                   |        |
| fragment_341.2125 | : 0.01 |                   |        |
| fragment_403.2275 | : 0.01 |                   |        |
| fragment_299.2025 | : 0.01 |                   |        |
| fragment_323.2025 | : 0.01 |                   |        |
| fragment_524.4075 | : 0.01 |                   |        |
| fragment_254.1975 | : 0.01 |                   |        |
| fragment_223.1475 | : 0.01 |                   |        |
| fragment_213.1275 | : 0.01 |                   |        |
| fragment_185.0975 | : 0.01 |                   |        |
| fragment_341.2075 | : 0.01 |                   |        |

StrepSalini\_motif\_144.m2m

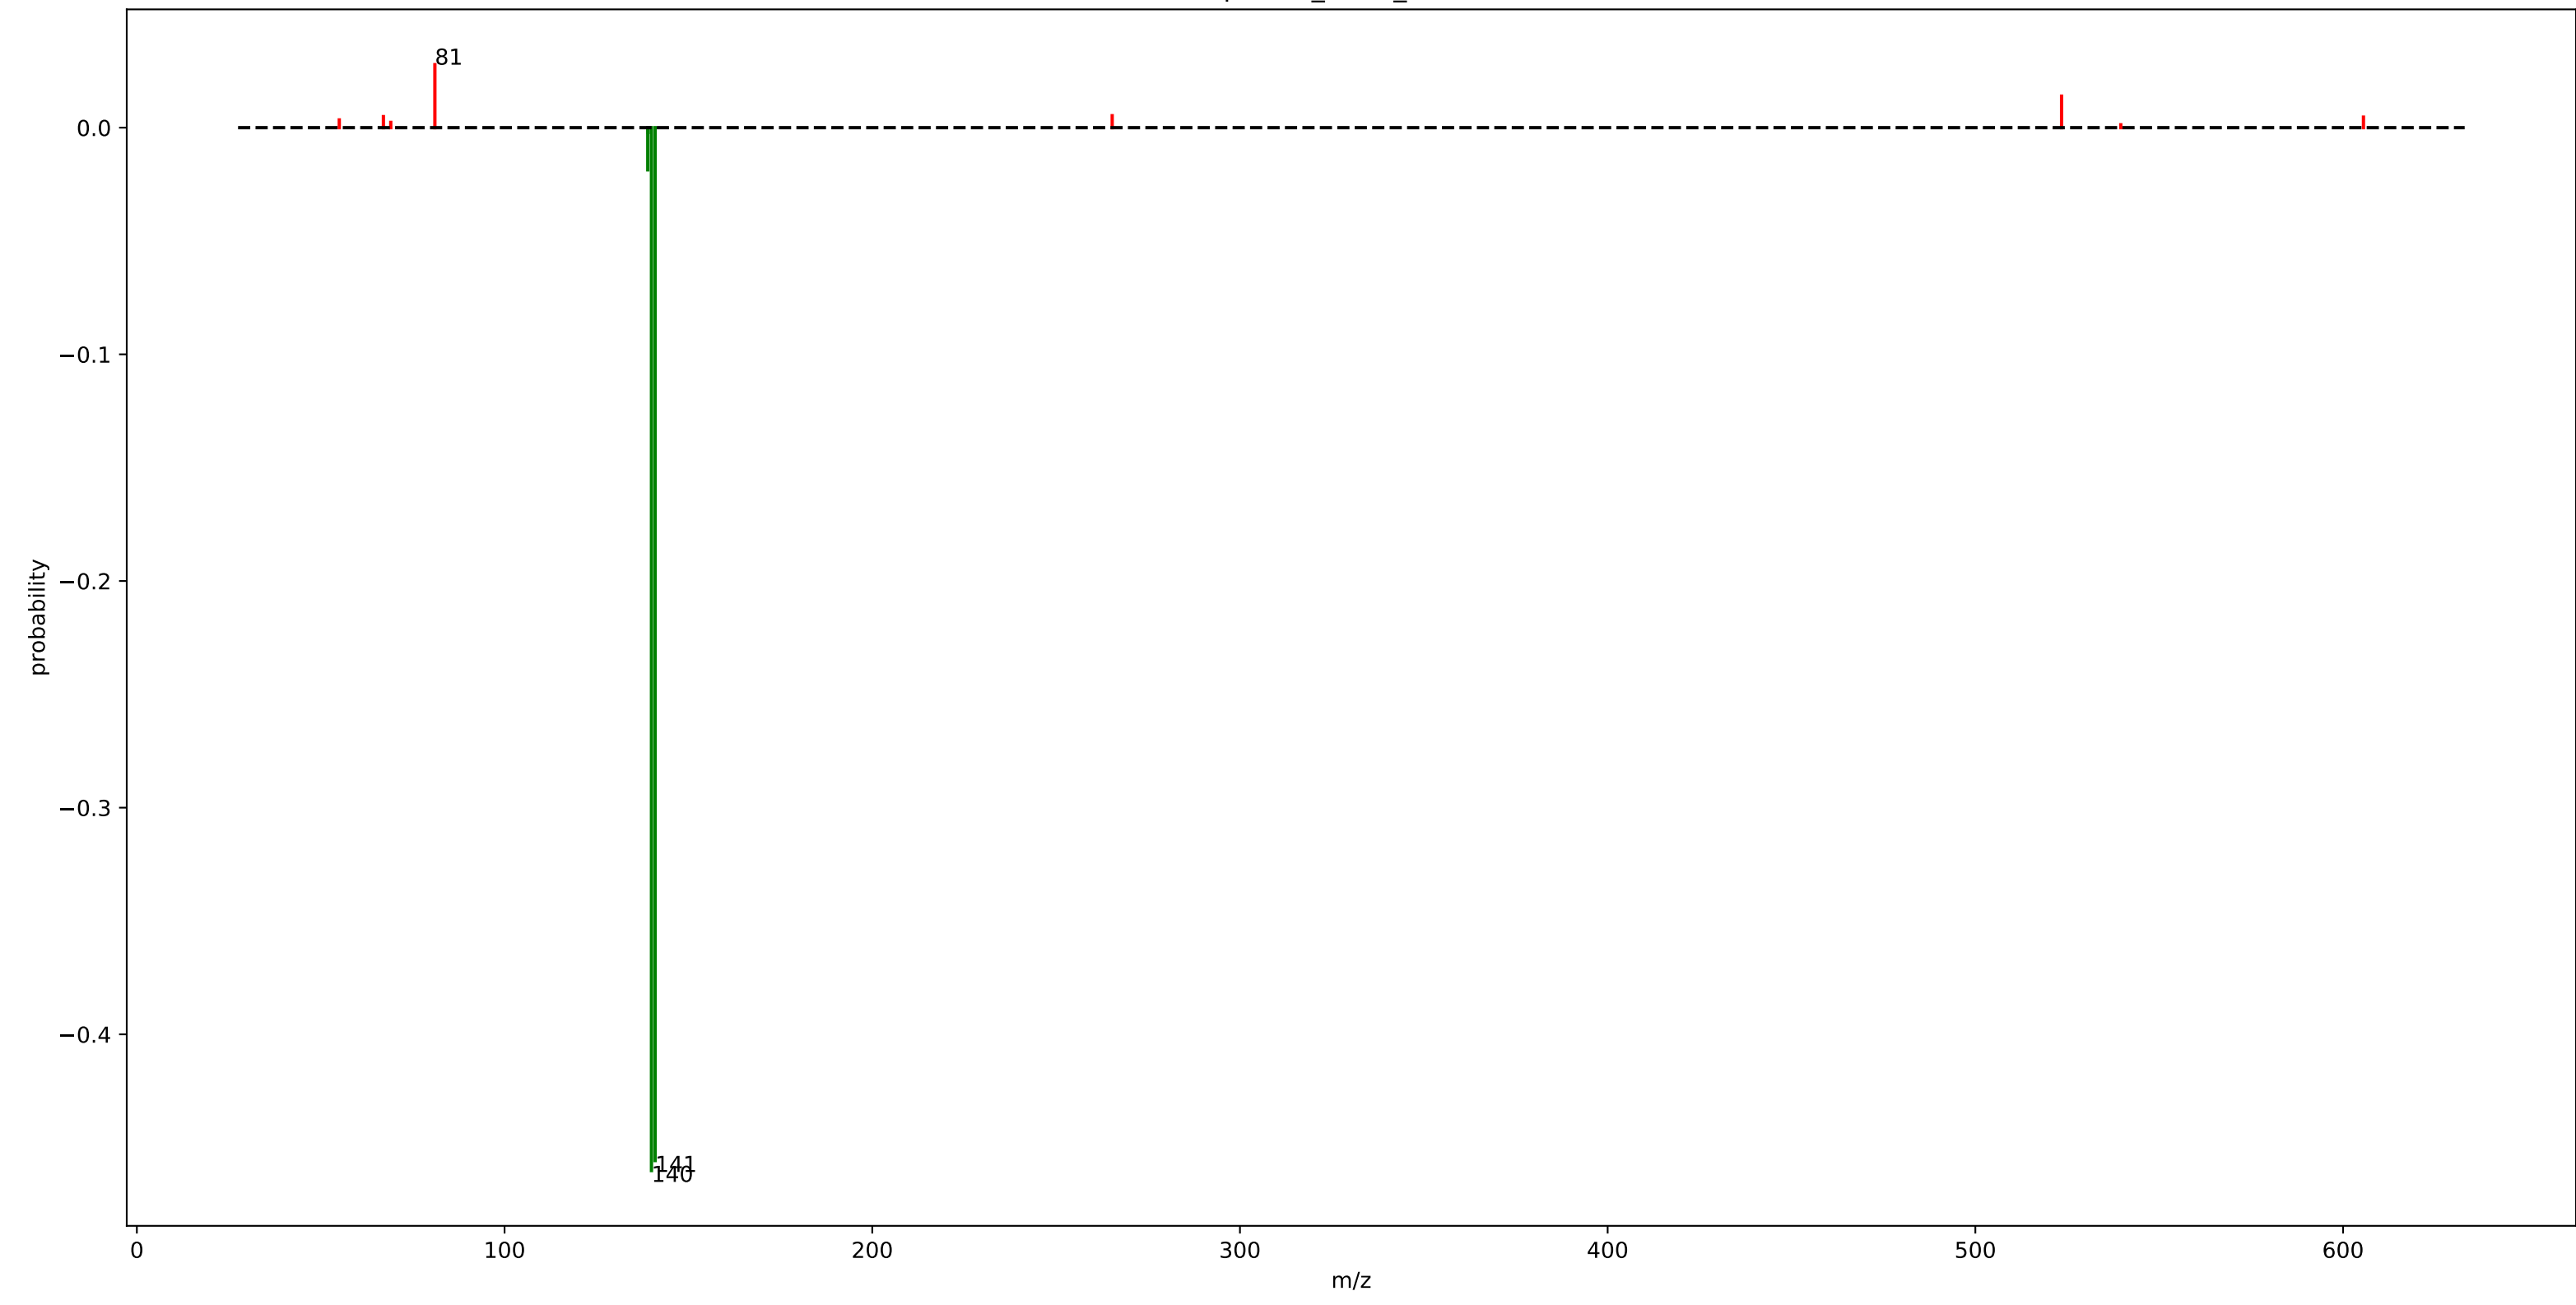

## StrepSalini\_motif\_144.m2m

|                   |        |
|-------------------|--------|
| loss_139.9500     | : 0.46 |
| loss_140.9500     | : 0.46 |
| fragment_81.0500  | : 0.03 |
| loss_138.9500     | : 0.02 |
| fragment_523.4500 | : 0.01 |
| fragment_265.2525 | : 0.01 |

motif\_408

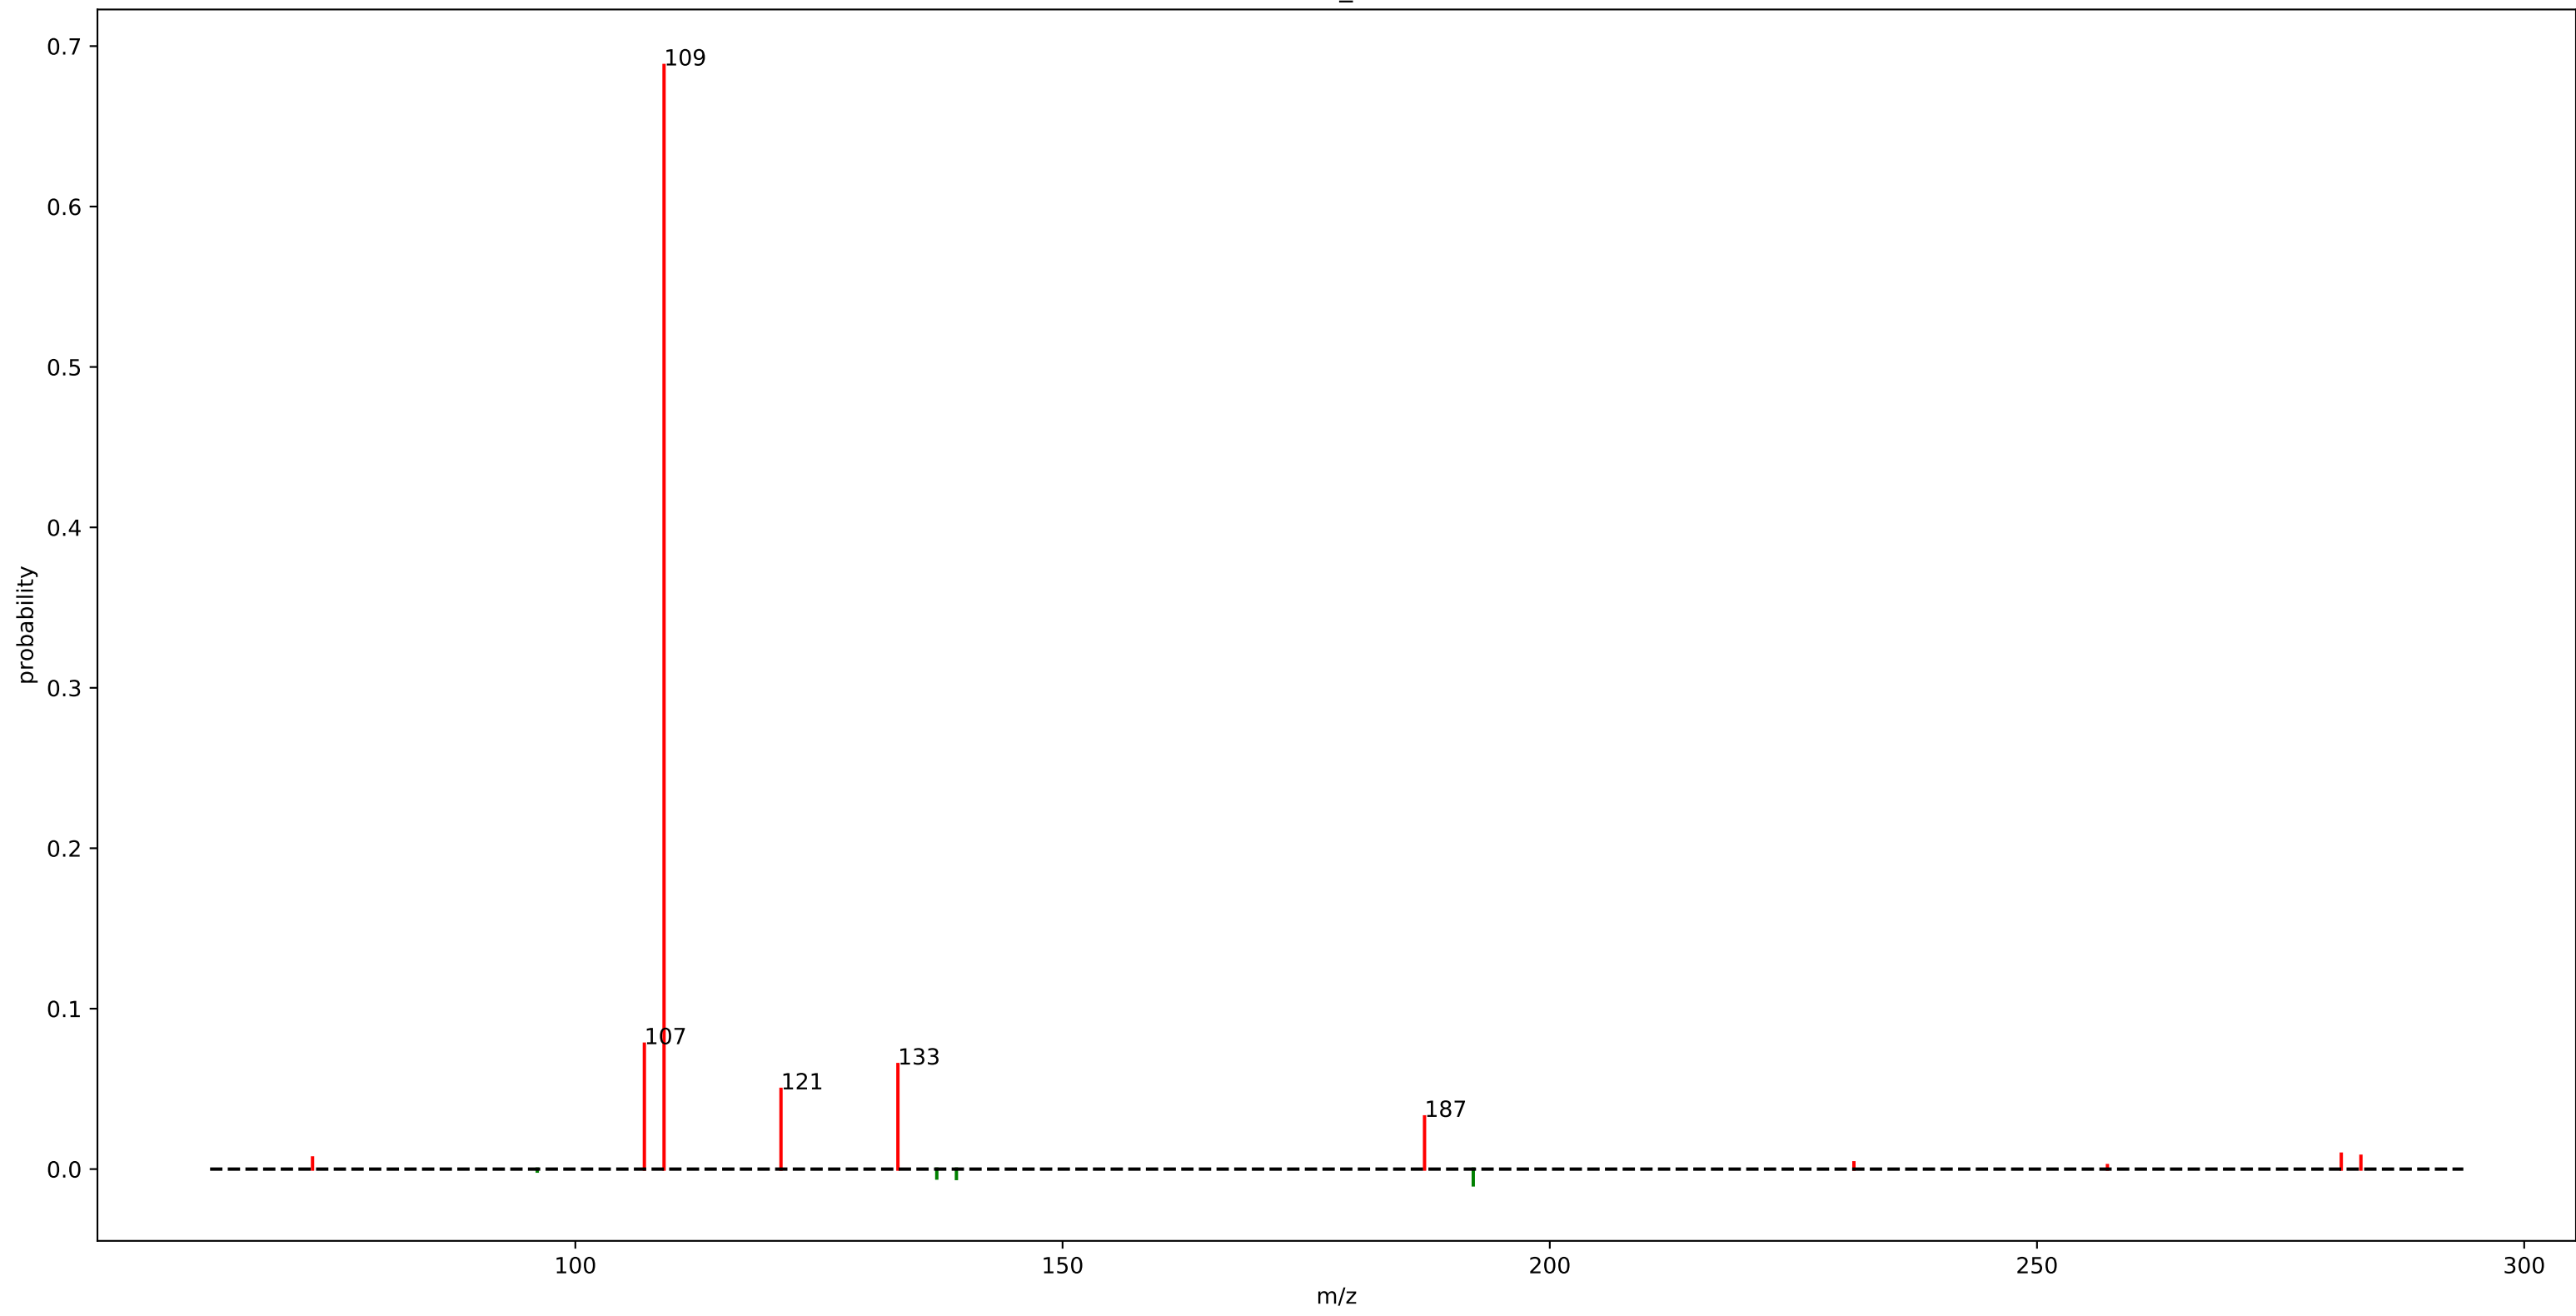

## motif\_408

|                   |        |
|-------------------|--------|
| fragment_109.1025 | : 0.69 |
| fragment_107.0825 | : 0.08 |
| fragment_133.1025 | : 0.07 |
| fragment_121.1025 | : 0.05 |
| fragment_187.1475 | : 0.03 |
| loss_192.1475     | : 0.01 |
| fragment_281.2275 | : 0.01 |
| fragment_283.2425 | : 0.01 |
| fragment_73.0275  | : 0.01 |
| loss_139.1075     | : 0.01 |
| loss_137.0925     | : 0.01 |



urine\_mass2motif\_88.m2m

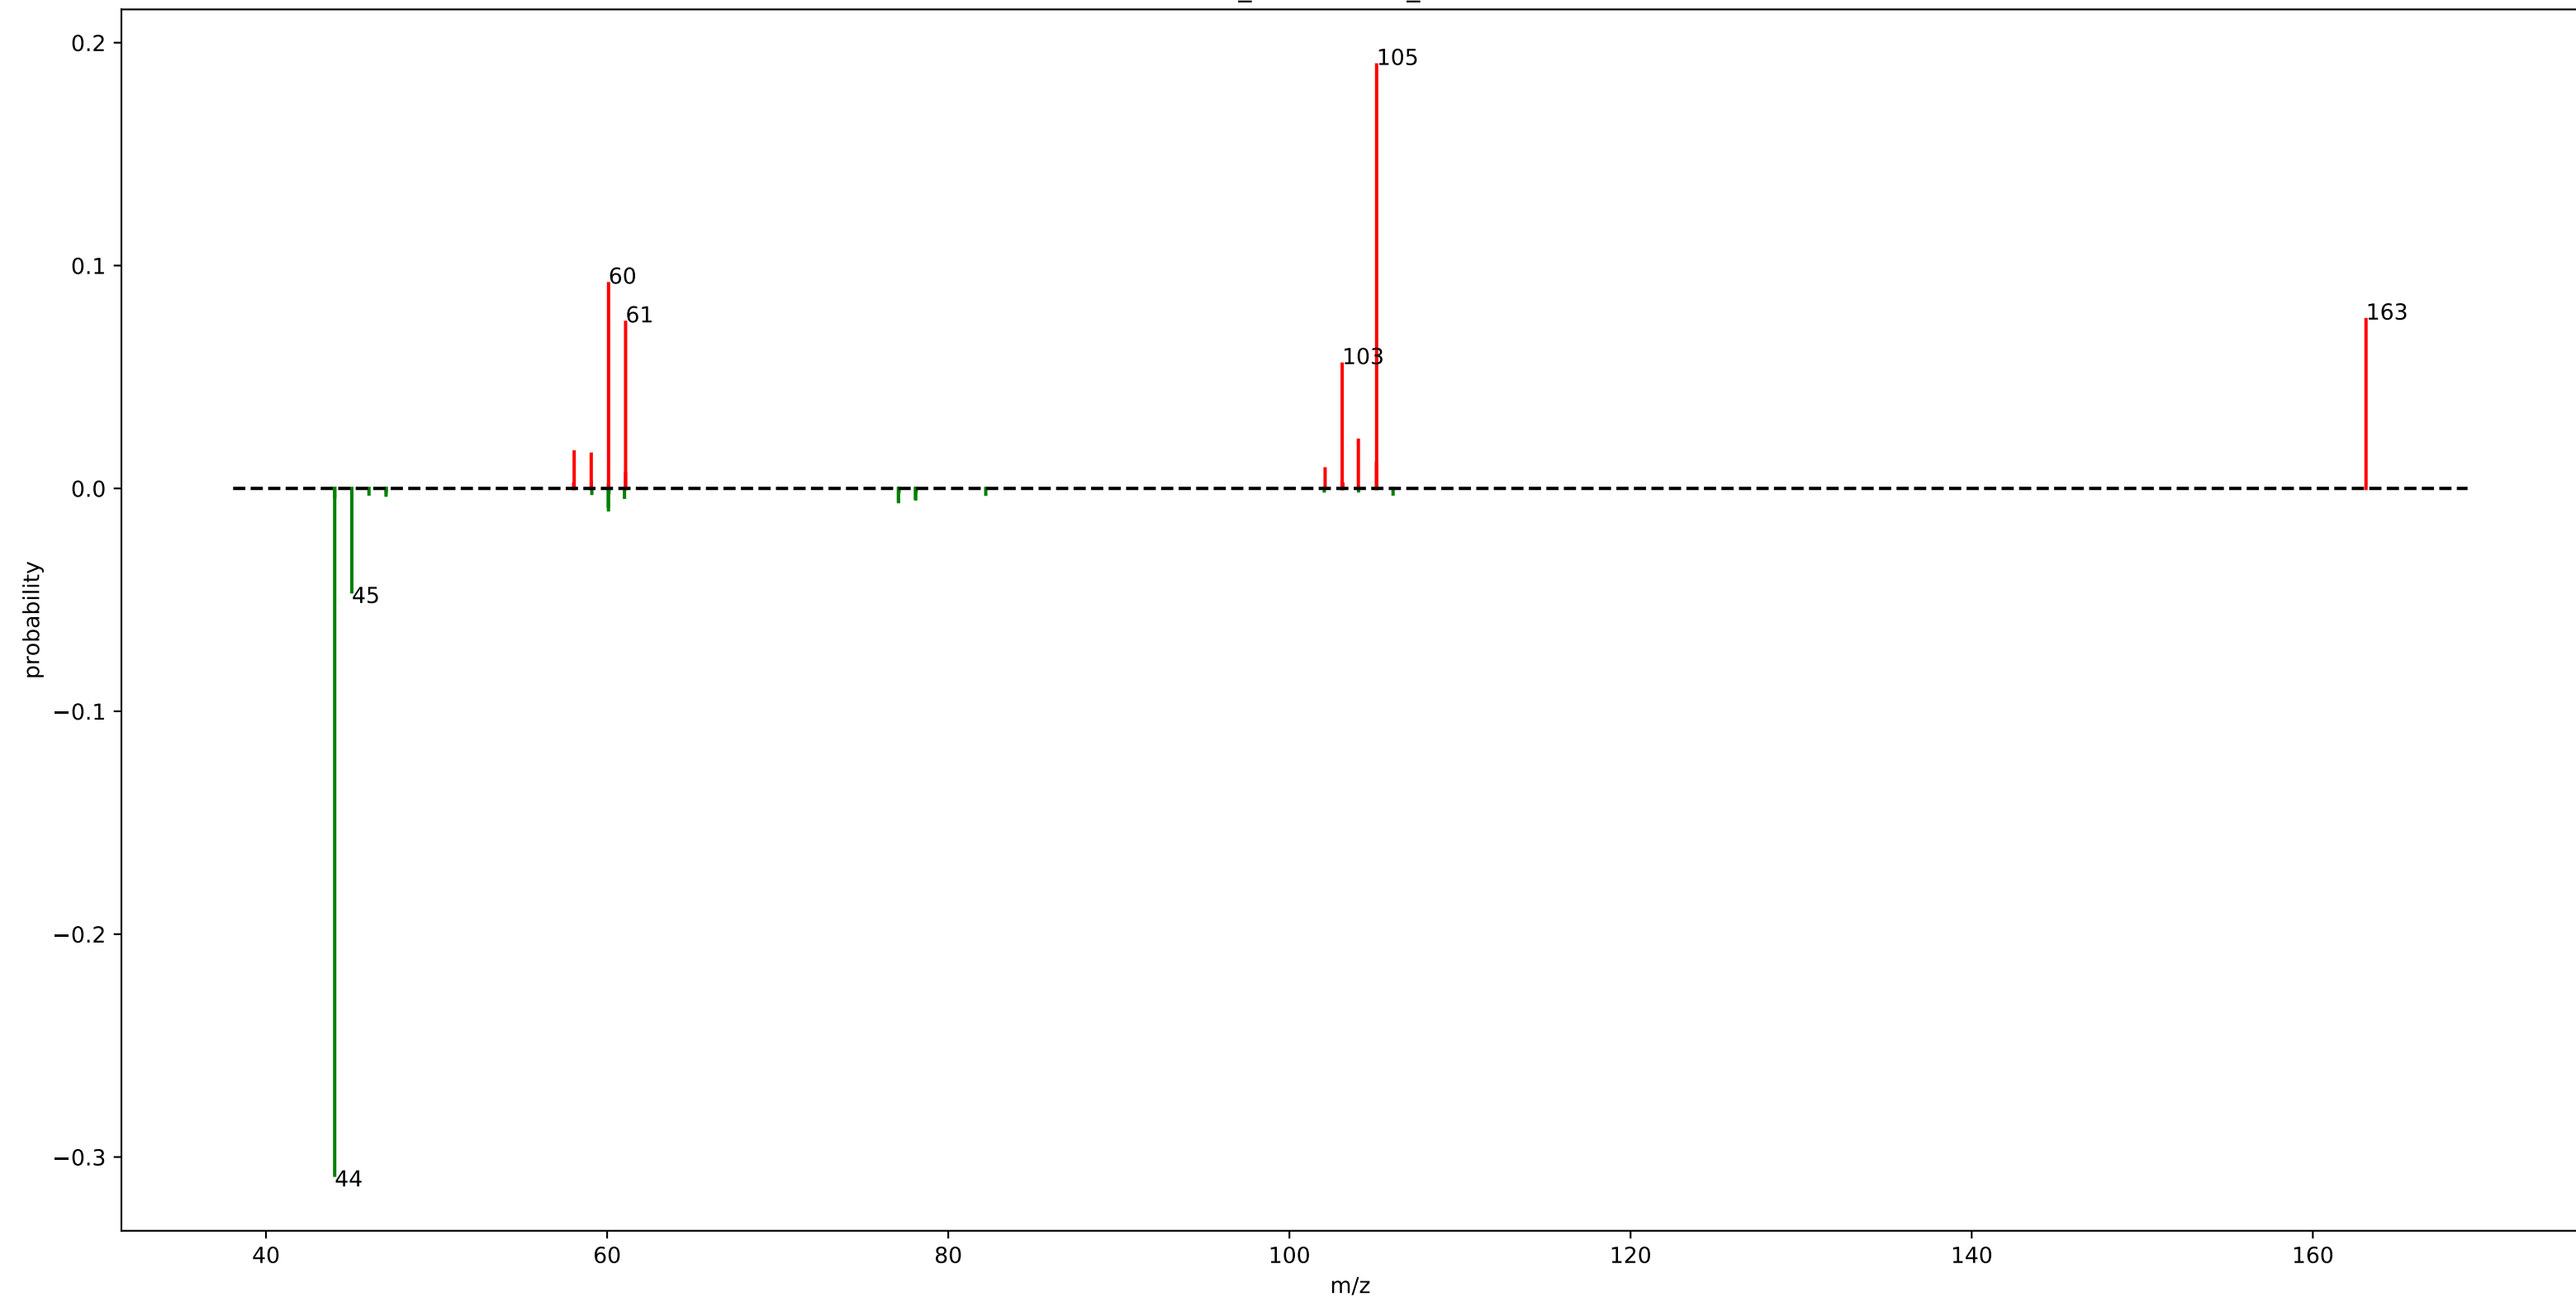

## urine\_mass2motif\_88.m2m

|                   |        |
|-------------------|--------|
| loss_44.0275      | : 0.31 |
| fragment_105.1125 | : 0.19 |
| fragment_60.0825  | : 0.09 |
| fragment_163.1175 | : 0.08 |
| fragment_61.0825  | : 0.07 |
| fragment_103.0925 | : 0.06 |
| loss_45.0325      | : 0.05 |
| fragment_104.0425 | : 0.02 |
| fragment_58.0675  | : 0.02 |
| fragment_59.0675  | : 0.02 |
| fragment_105.1025 | : 0.01 |
| loss_60.0775      | : 0.01 |
| fragment_102.0925 | : 0.01 |
| loss_60.0675      | : 0.01 |
| fragment_61.0775  | : 0.01 |
| loss_77.0825      | : 0.01 |
| loss_77.0775      | : 0.01 |

gnps\_motif\_73.m2m

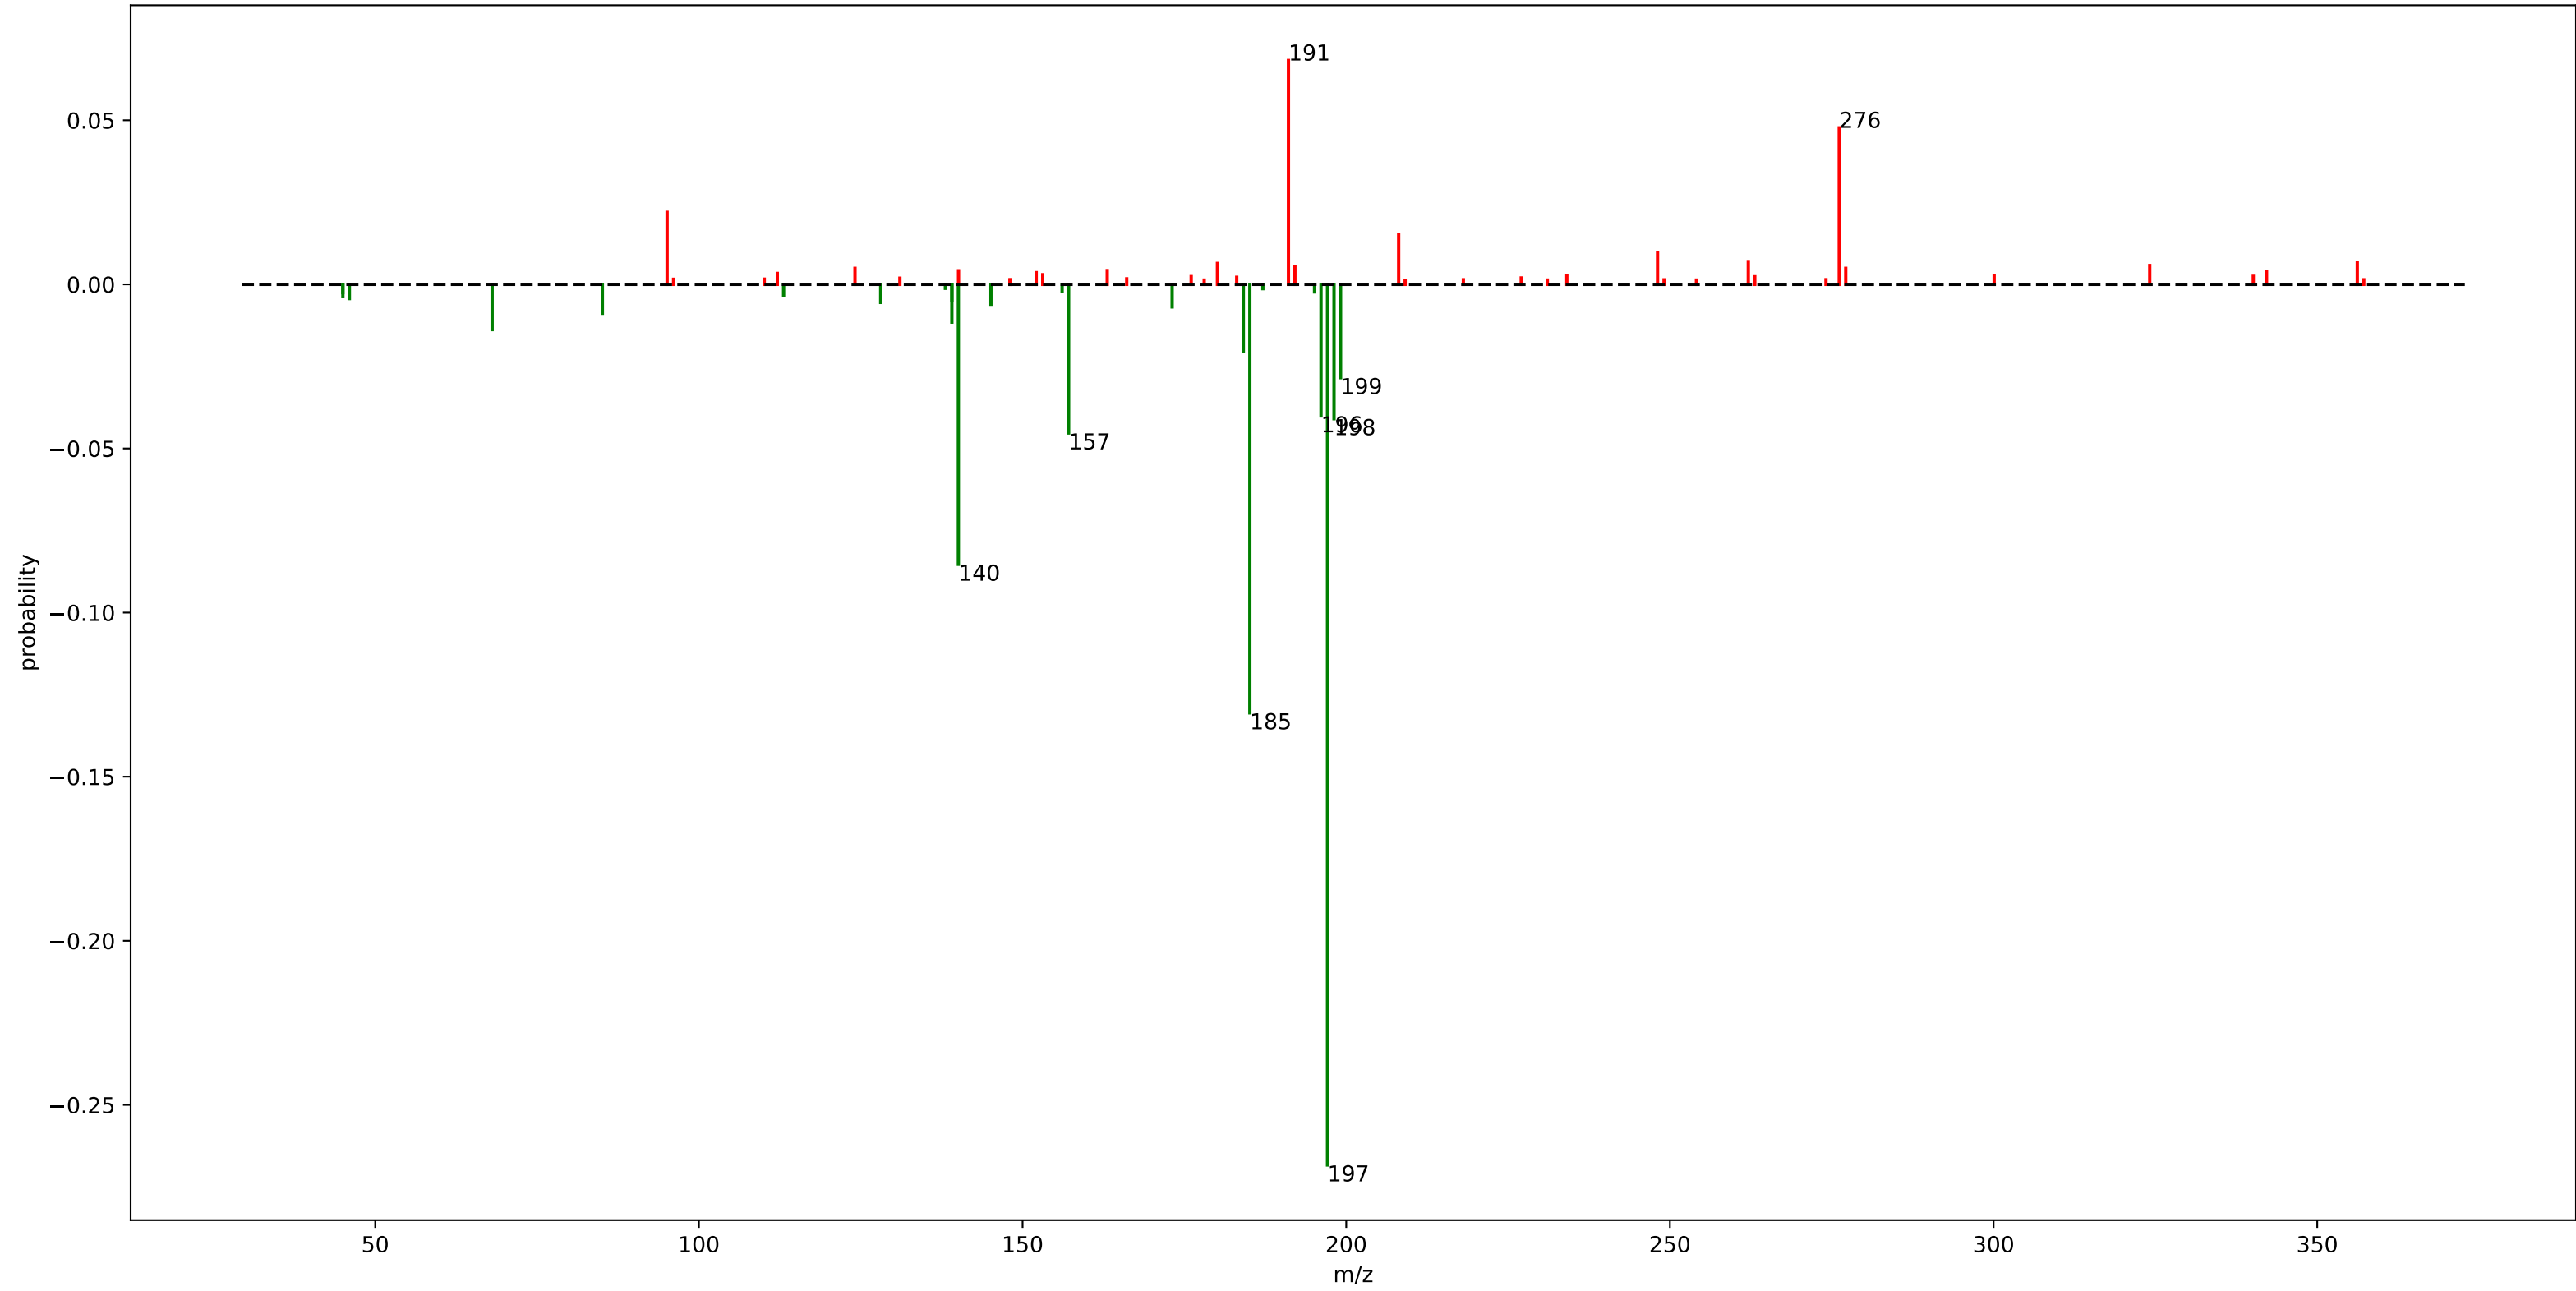

## gnps\_motif\_73.m2m

|                   |        |                   |        |
|-------------------|--------|-------------------|--------|
| loss_197.1075     | : 0.27 | loss_145.1125     | : 0.01 |
| loss_185.1075     | : 0.13 | fragment_324.1225 | : 0.01 |
| loss_140.0825     | : 0.09 | loss_128.0825     | : 0.01 |
| fragment_191.0725 | : 0.07 | fragment_192.0725 | : 0.01 |
| fragment_276.1575 | : 0.05 |                   |        |
| loss_157.1125     | : 0.05 |                   |        |
| loss_198.1125     | : 0.04 |                   |        |
| loss_196.1025     | : 0.04 |                   |        |
| loss_199.1225     | : 0.03 |                   |        |
| fragment_95.0875  | : 0.02 |                   |        |
| loss_184.1025     | : 0.02 |                   |        |
| fragment_208.0975 | : 0.02 |                   |        |
| loss_68.0625      | : 0.01 |                   |        |
| loss_139.0775     | : 0.01 |                   |        |
| fragment_248.0925 | : 0.01 |                   |        |
| loss_85.0875      | : 0.01 |                   |        |
| fragment_262.1075 | : 0.01 |                   |        |
| loss_173.1025     | : 0.01 |                   |        |
| fragment_356.1875 | : 0.01 |                   |        |
| fragment_180.1025 | : 0.01 |                   |        |

gnps\_motif\_7.m2m

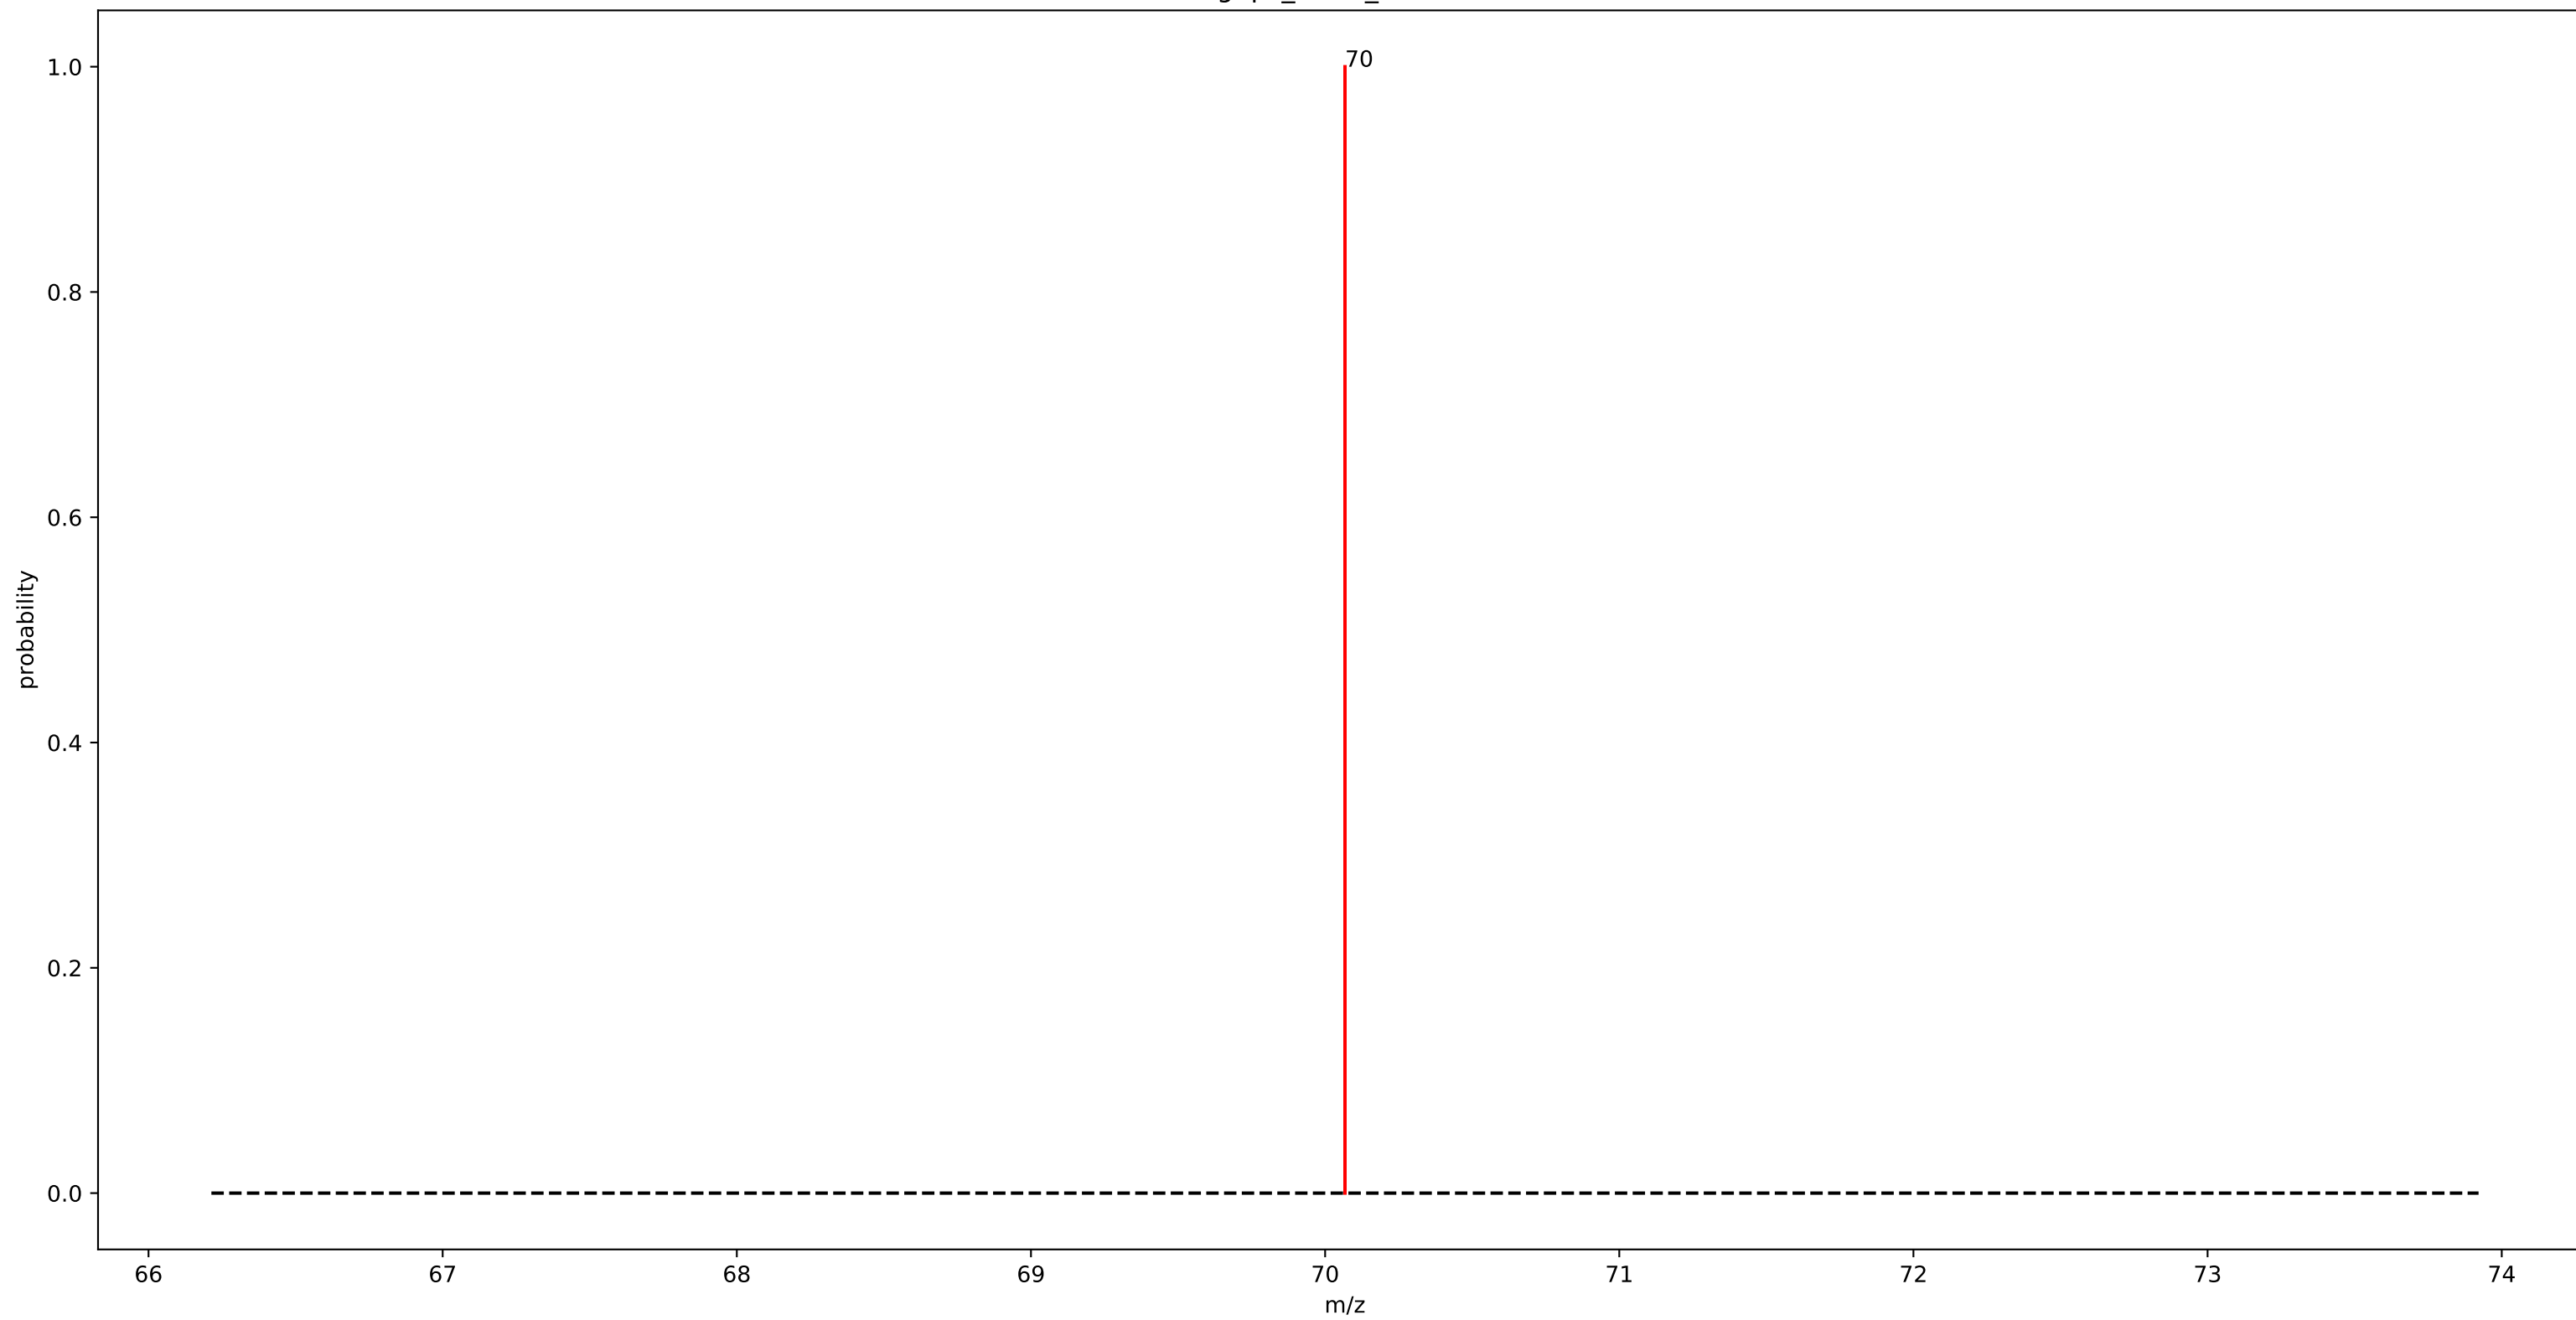

# gnps\_motif\_7.m2m

fragment\_70.0675 : 1.00

motif\_677

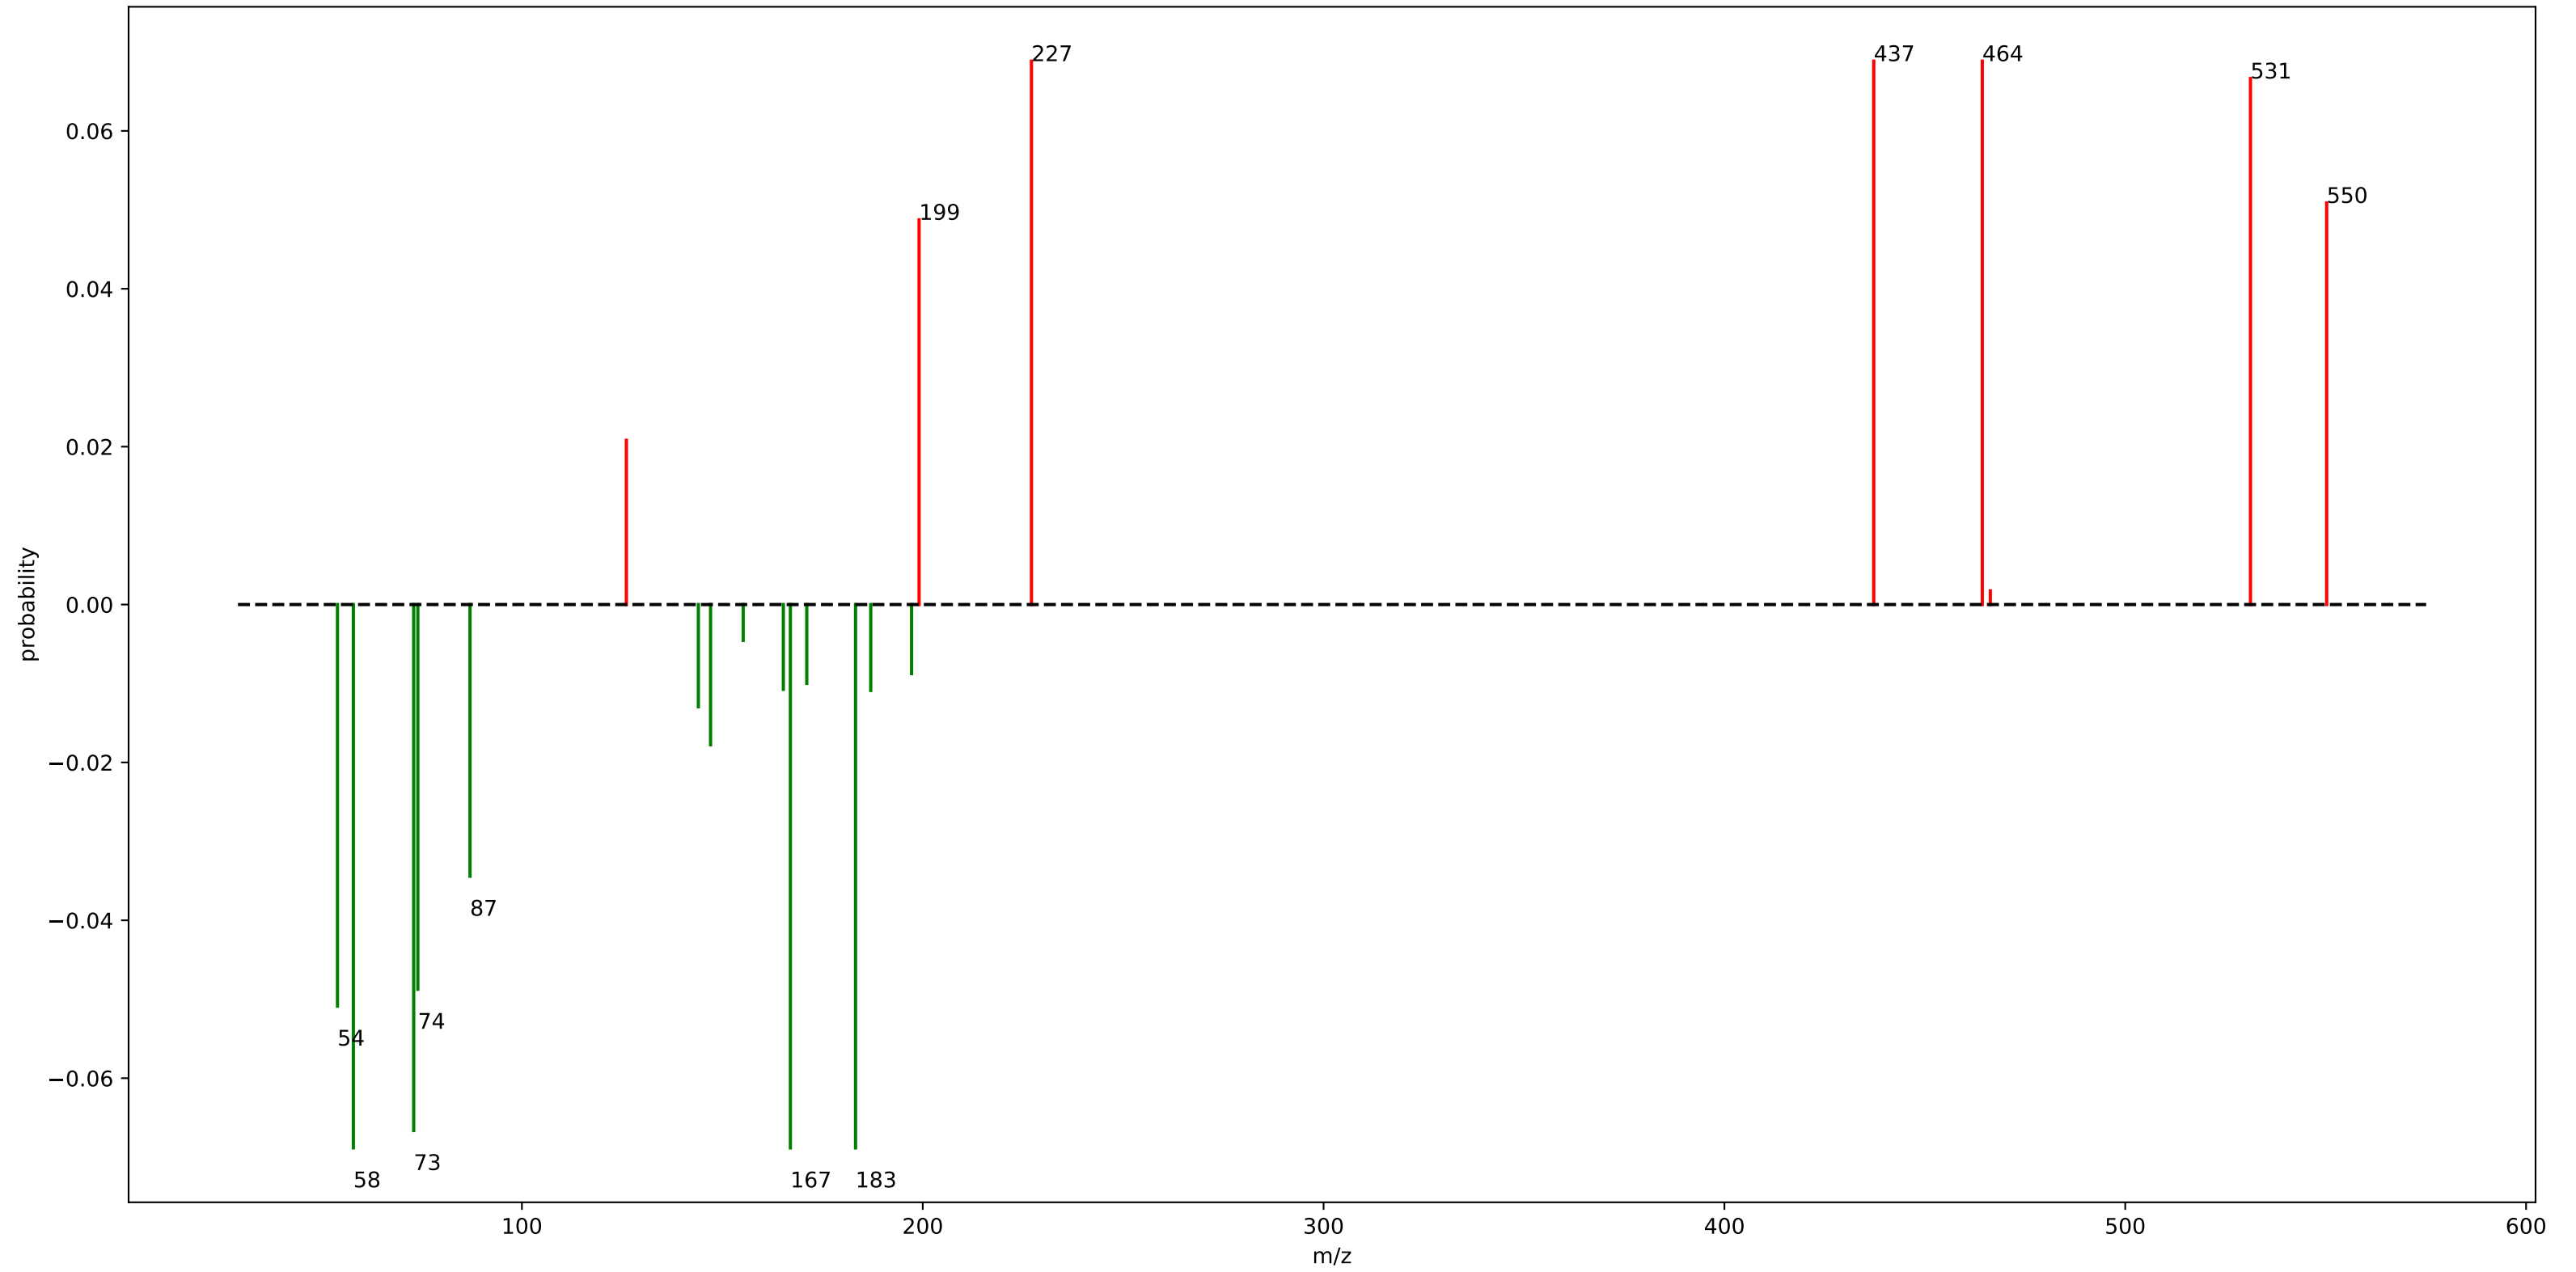

## motif\_677

|                   |        |
|-------------------|--------|
| fragment_437.2625 | : 0.07 |
| loss_166.9775     | : 0.07 |
| fragment_227.1175 | : 0.07 |
| loss_183.2325     | : 0.07 |
| fragment_464.3375 | : 0.07 |
| loss_57.9525      | : 0.07 |
| fragment_531.2375 | : 0.07 |
| loss_73.0025      | : 0.07 |
| loss_53.9825      | : 0.05 |
| fragment_550.2575 | : 0.05 |
| fragment_199.0875 | : 0.05 |
| loss_74.0375      | : 0.05 |
| loss_87.0475      | : 0.03 |
| fragment_126.0525 | : 0.02 |
| loss_147.0675     | : 0.02 |
| loss_144.0225     | : 0.01 |
| loss_187.0275     | : 0.01 |
| loss_165.2225     | : 0.01 |
| loss_171.0675     | : 0.01 |
| loss_197.2125     | : 0.01 |



motif\_437

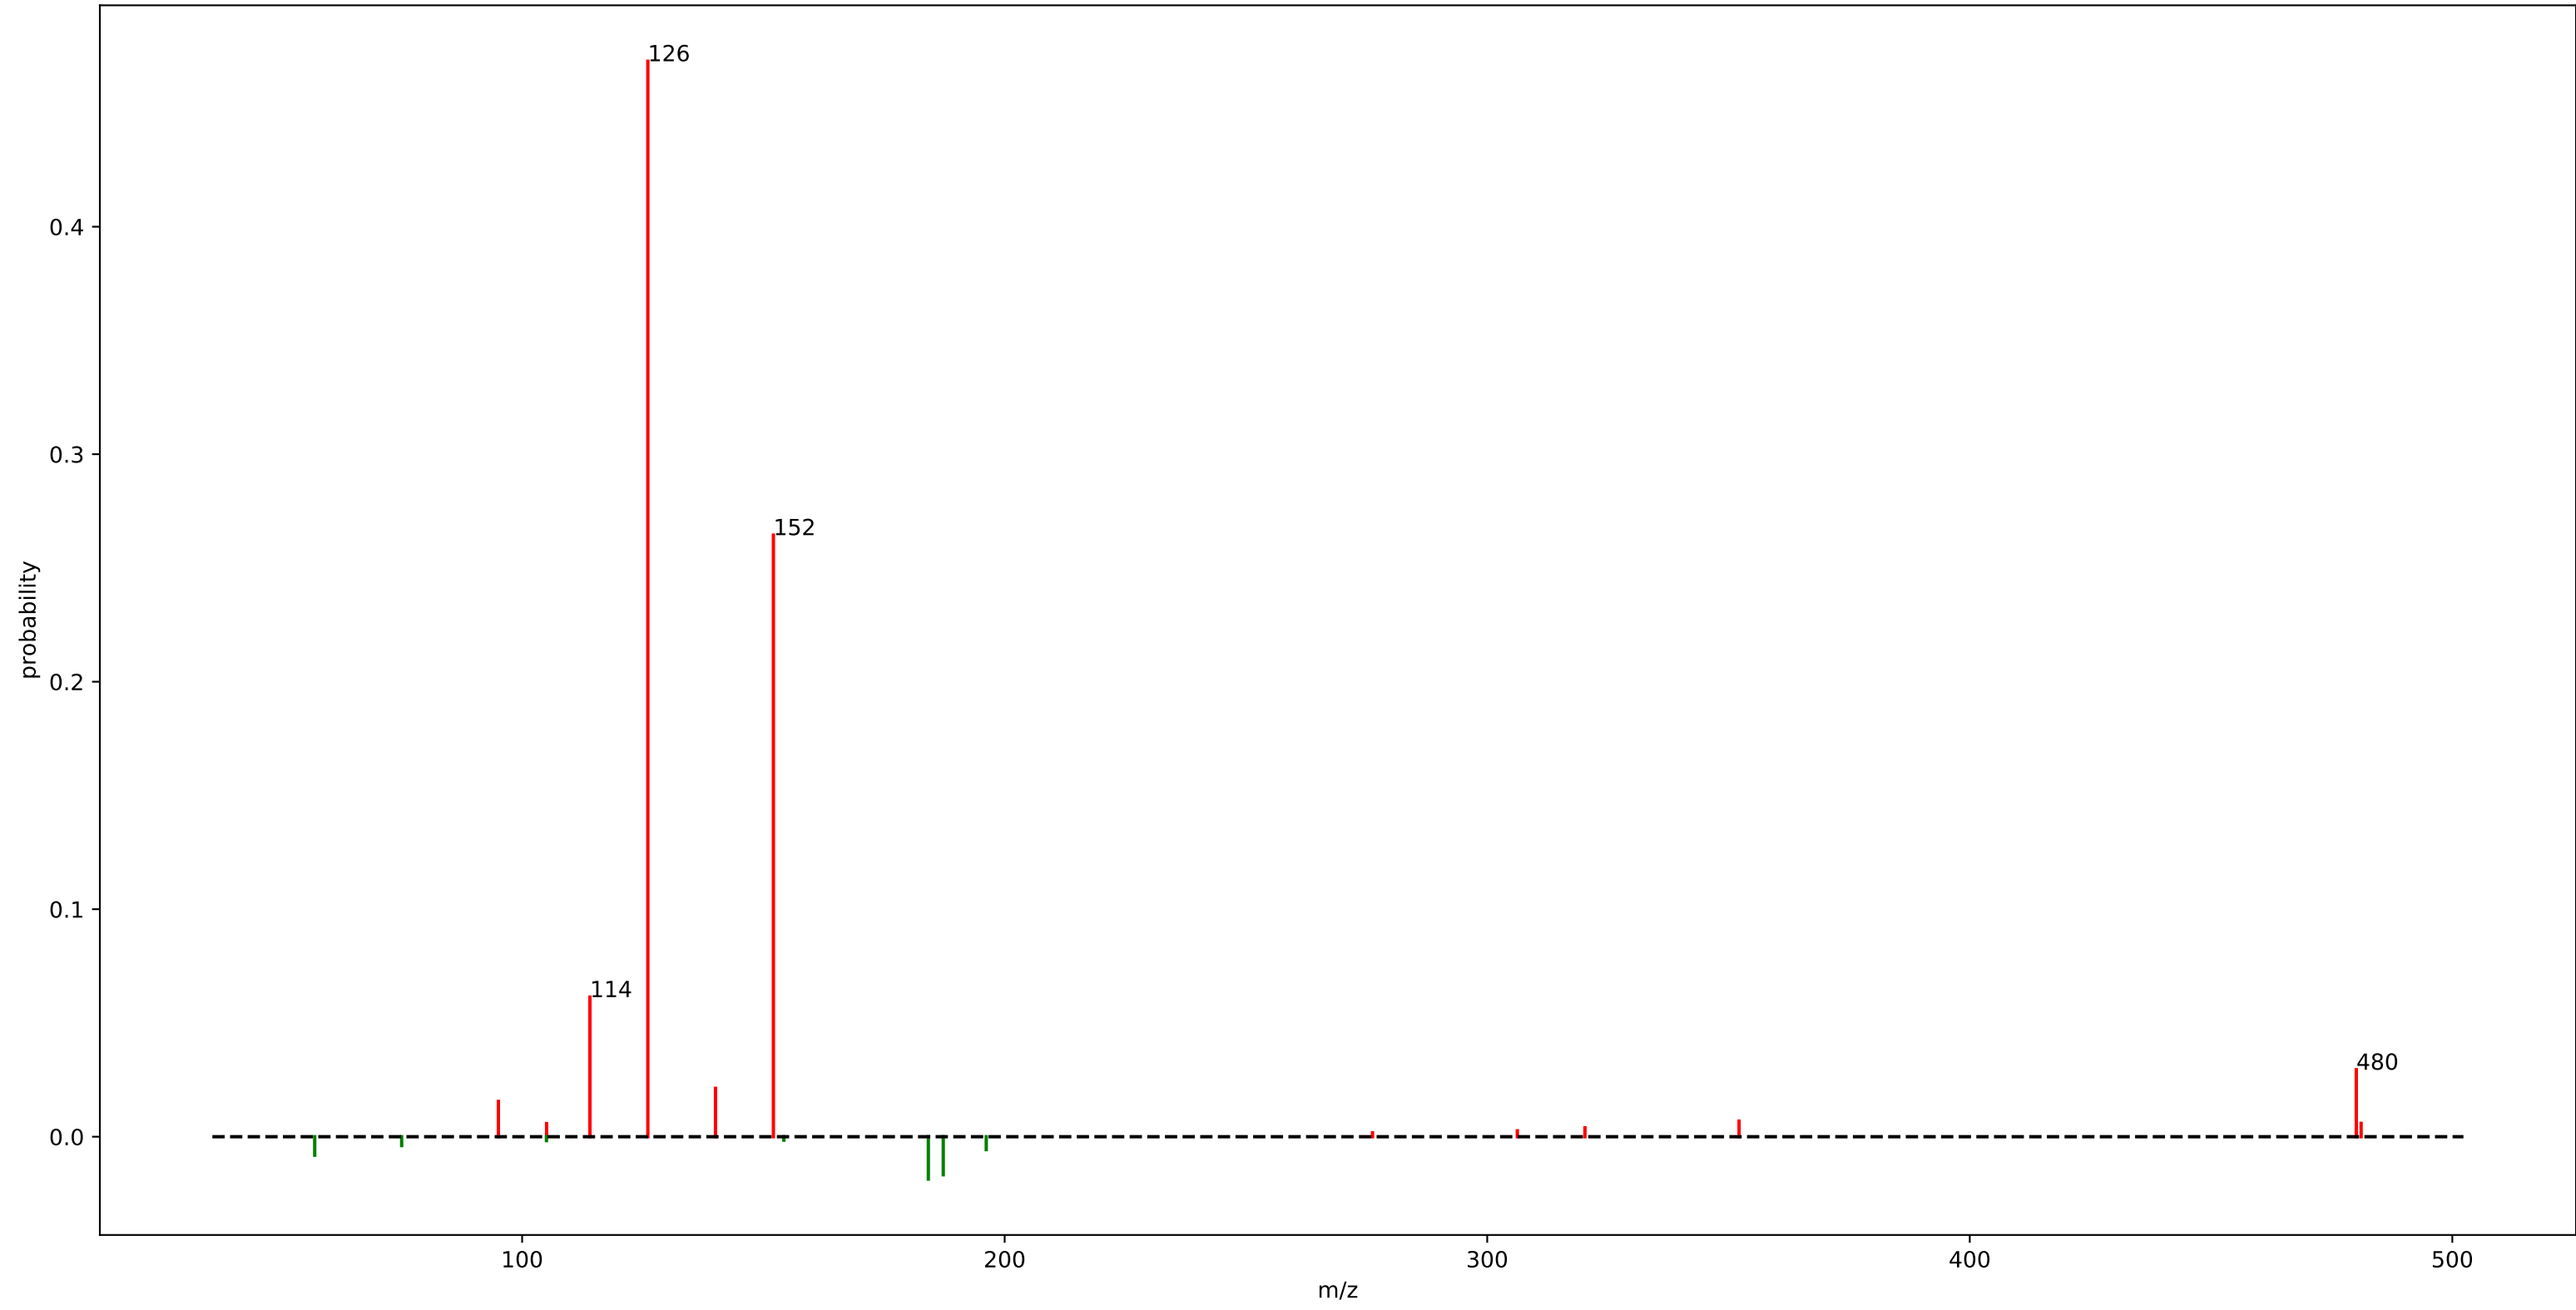

## motif\_437

|                   |        |
|-------------------|--------|
| fragment_126.0525 | : 0.47 |
| fragment_152.0725 | : 0.26 |
| fragment_114.0525 | : 0.06 |
| fragment_480.1025 | : 0.03 |
| fragment_140.0725 | : 0.02 |
| loss_184.1825     | : 0.02 |
| loss_187.2725     | : 0.02 |
| fragment_95.0825  | : 0.02 |
| loss_57.0175      | : 0.01 |
| fragment_352.1875 | : 0.01 |
| fragment_481.1025 | : 0.01 |
| fragment_105.0725 | : 0.01 |
| loss_196.1825     | : 0.01 |

urine\_mass2motif\_197.m2m

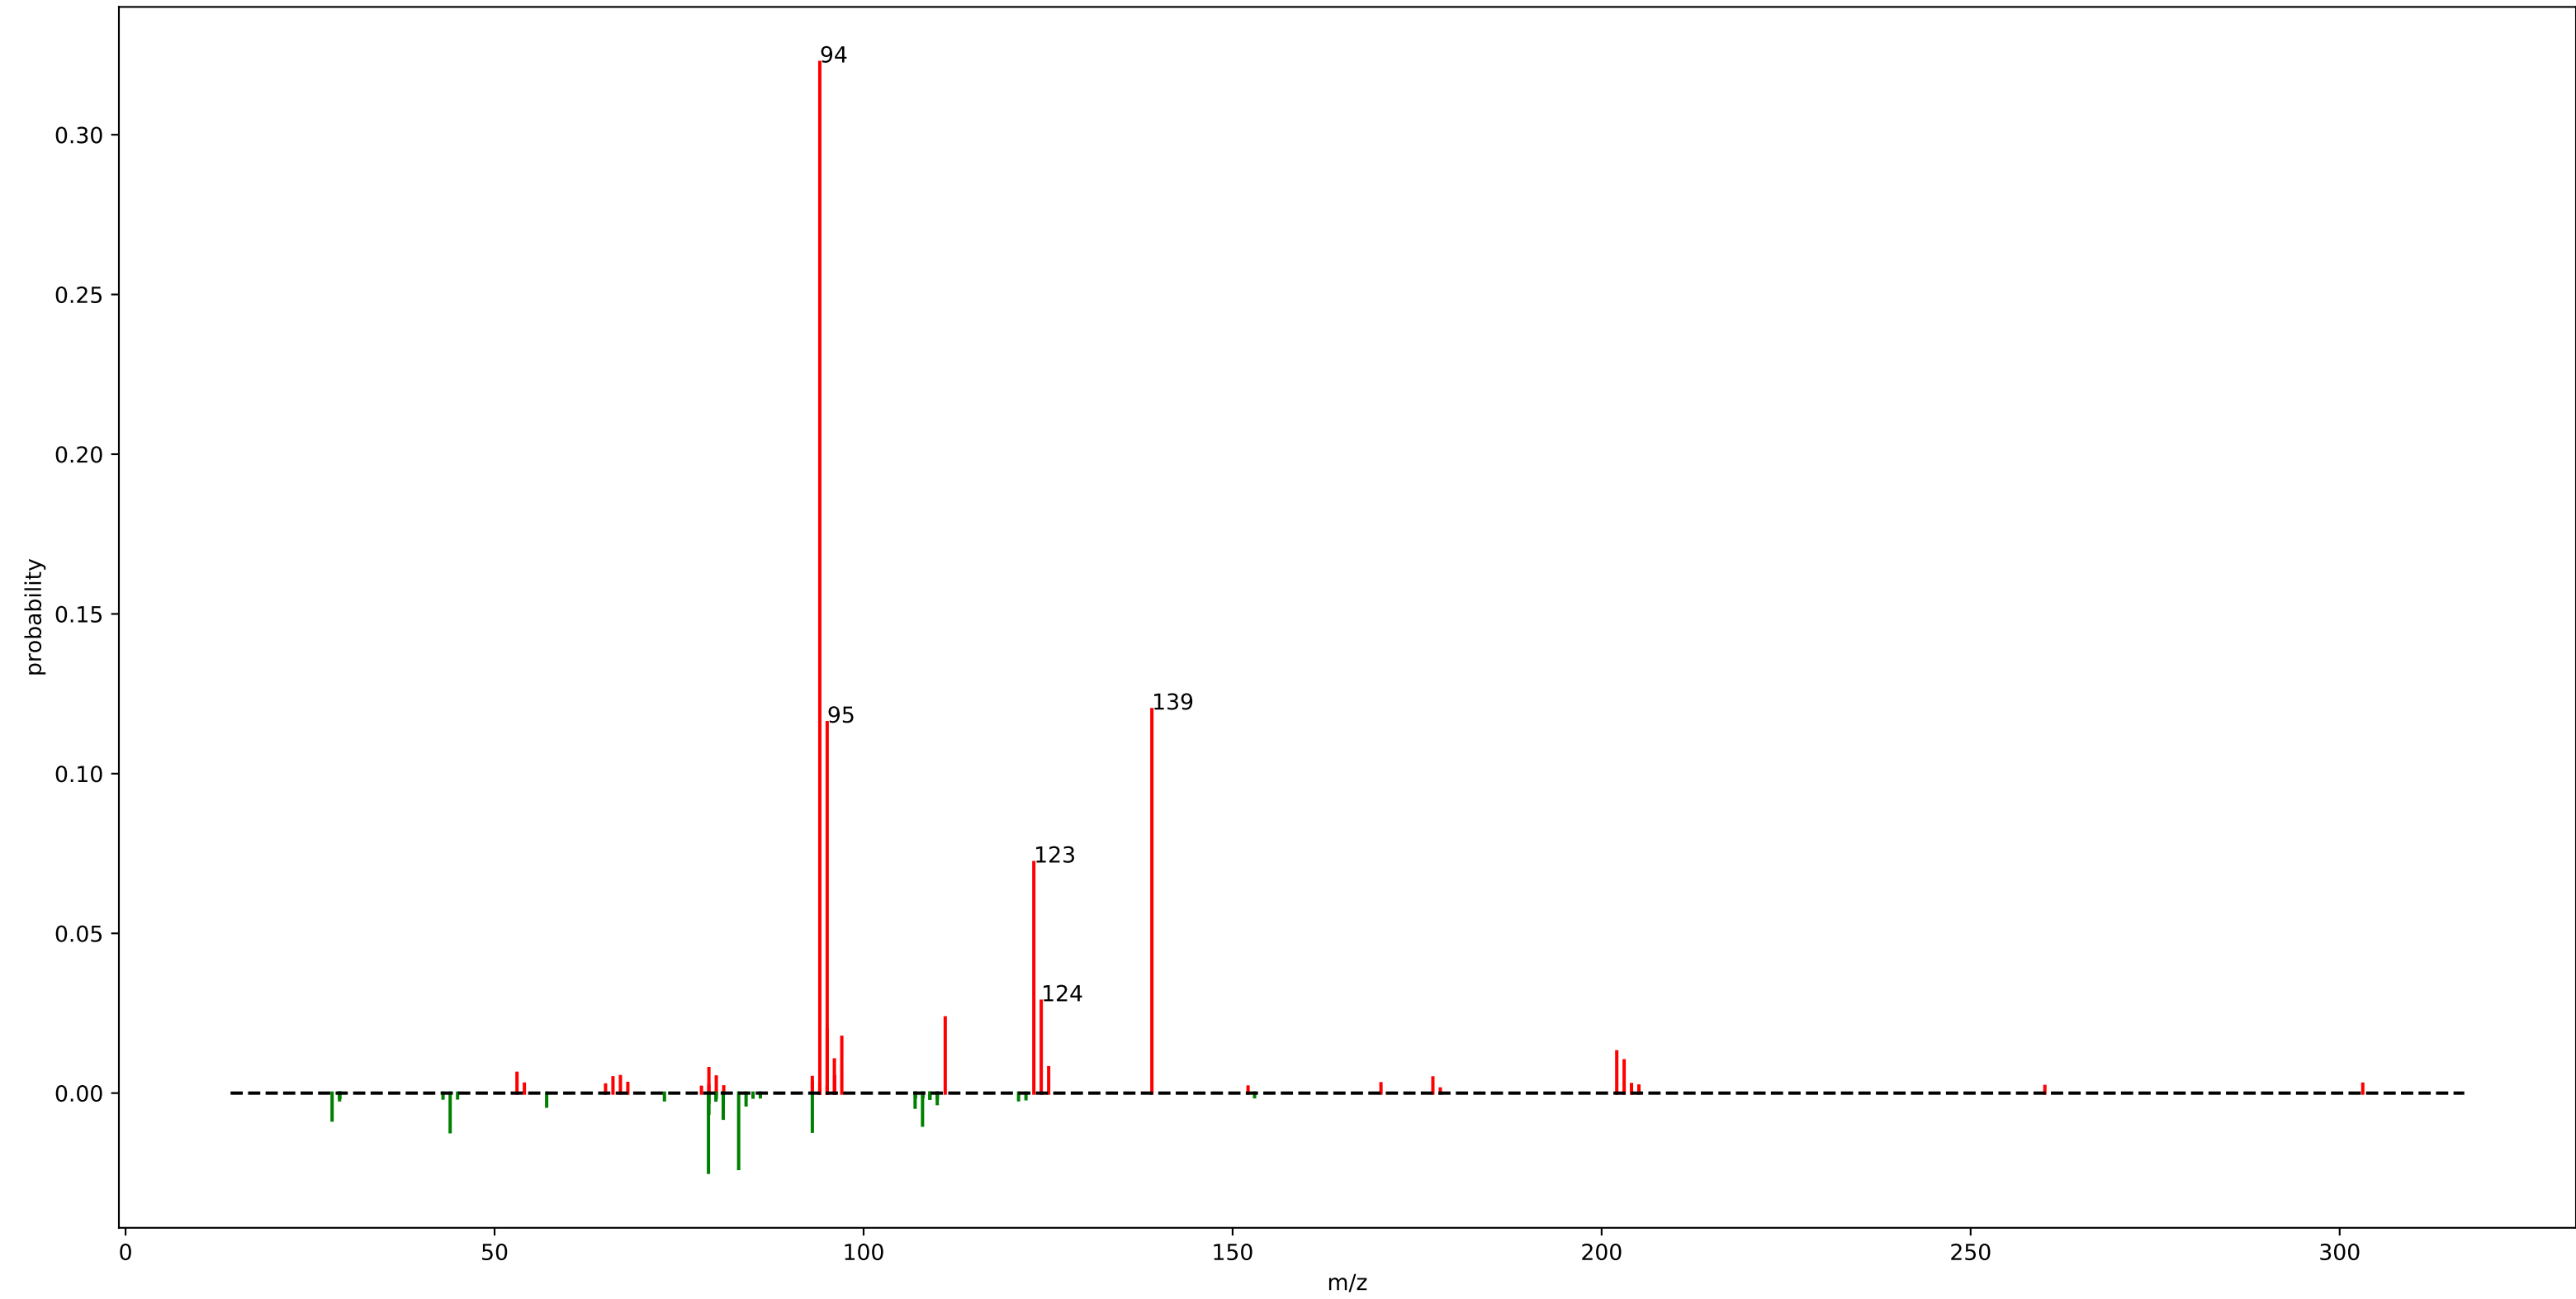

# urine\_mass2motif\_197.m2m

|                   |        |                  |        |
|-------------------|--------|------------------|--------|
| fragment_94.0675  | : 0.32 | loss_79.0375     | : 0.01 |
| fragment_139.0625 | : 0.12 | fragment_53.0375 | : 0.01 |
| fragment_95.0675  | : 0.12 | fragment_67.0525 | : 0.01 |
| fragment_123.0675 | : 0.07 | fragment_96.0775 | : 0.01 |
| fragment_124.0725 | : 0.03 | fragment_80.0425 | : 0.01 |
| loss_78.9825      | : 0.02 |                  |        |
| loss_83.0725      | : 0.02 |                  |        |
| fragment_111.0625 | : 0.02 |                  |        |
| fragment_95.0725  | : 0.02 |                  |        |
| fragment_97.0475  | : 0.02 |                  |        |
| fragment_202.0525 | : 0.01 |                  |        |
| loss_43.9825      | : 0.01 |                  |        |
| loss_93.0575      | : 0.01 |                  |        |
| fragment_96.0425  | : 0.01 |                  |        |
| fragment_203.0525 | : 0.01 |                  |        |
| loss_107.9875     | : 0.01 |                  |        |
| loss_27.9875      | : 0.01 |                  |        |
| fragment_125.0775 | : 0.01 |                  |        |
| loss_80.9825      | : 0.01 |                  |        |
| fragment_79.0425  | : 0.01 |                  |        |

StrepSalini\_motif\_85.m2m

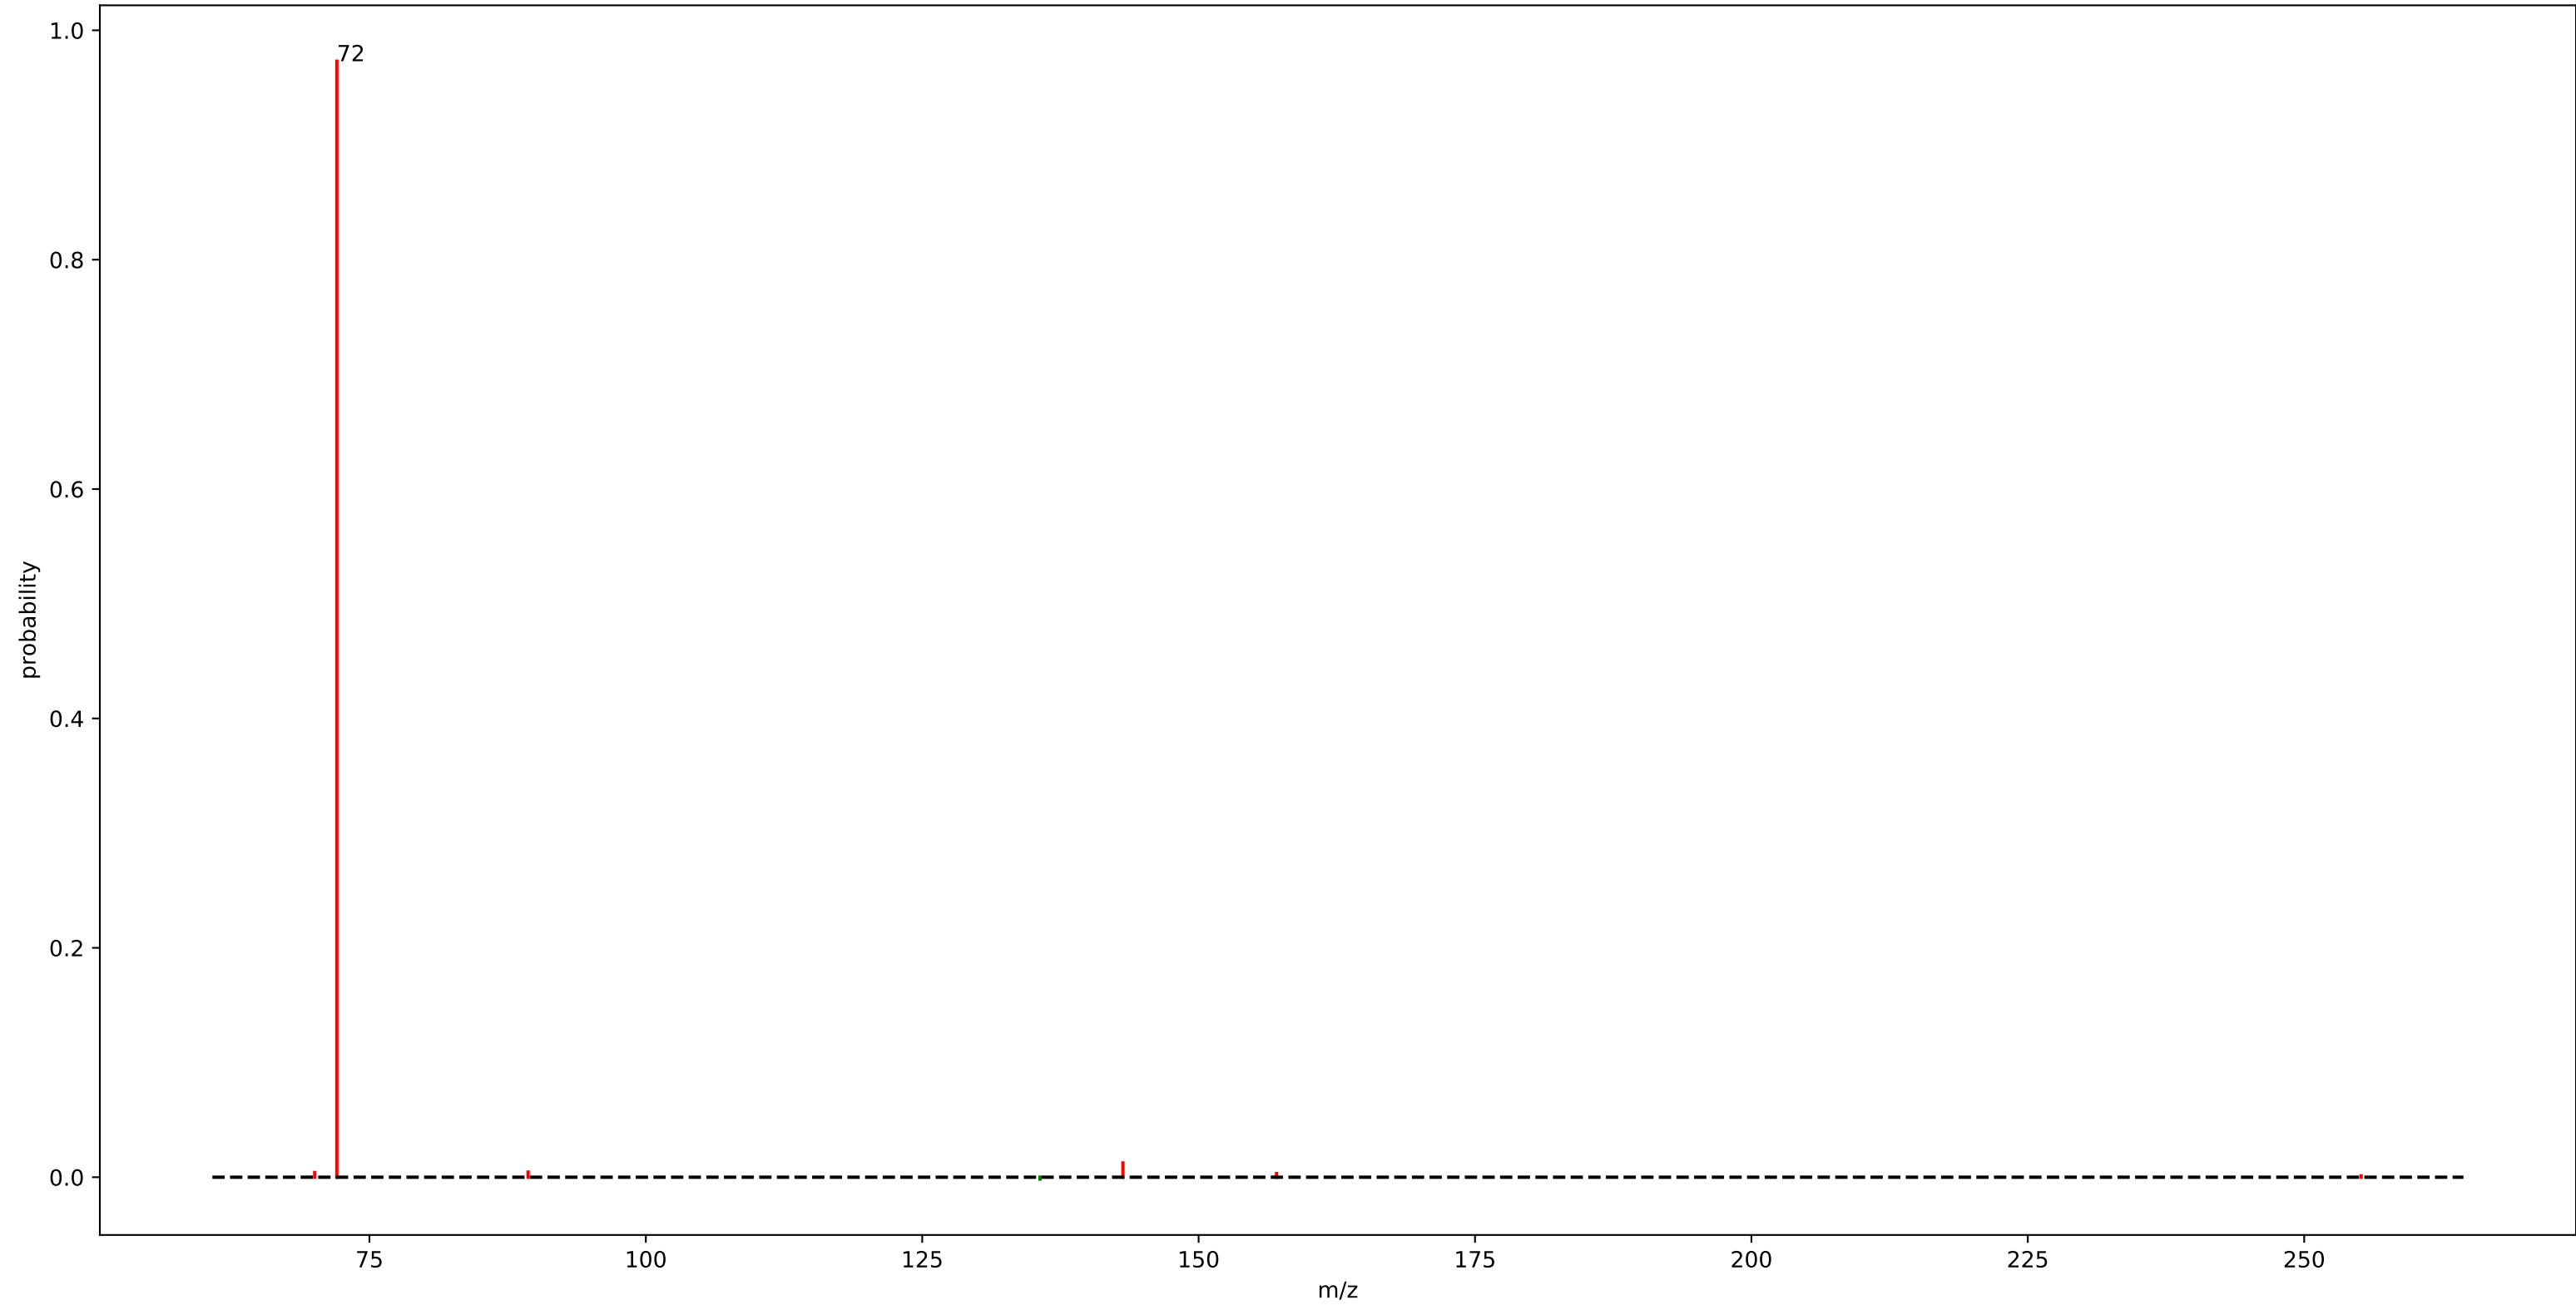

# StrepSalini\_motif\_85.m2m

fragment\_72.0500 : 0.97  
fragment\_143.1525 : 0.01

urine\_mass2motif\_137.m2m

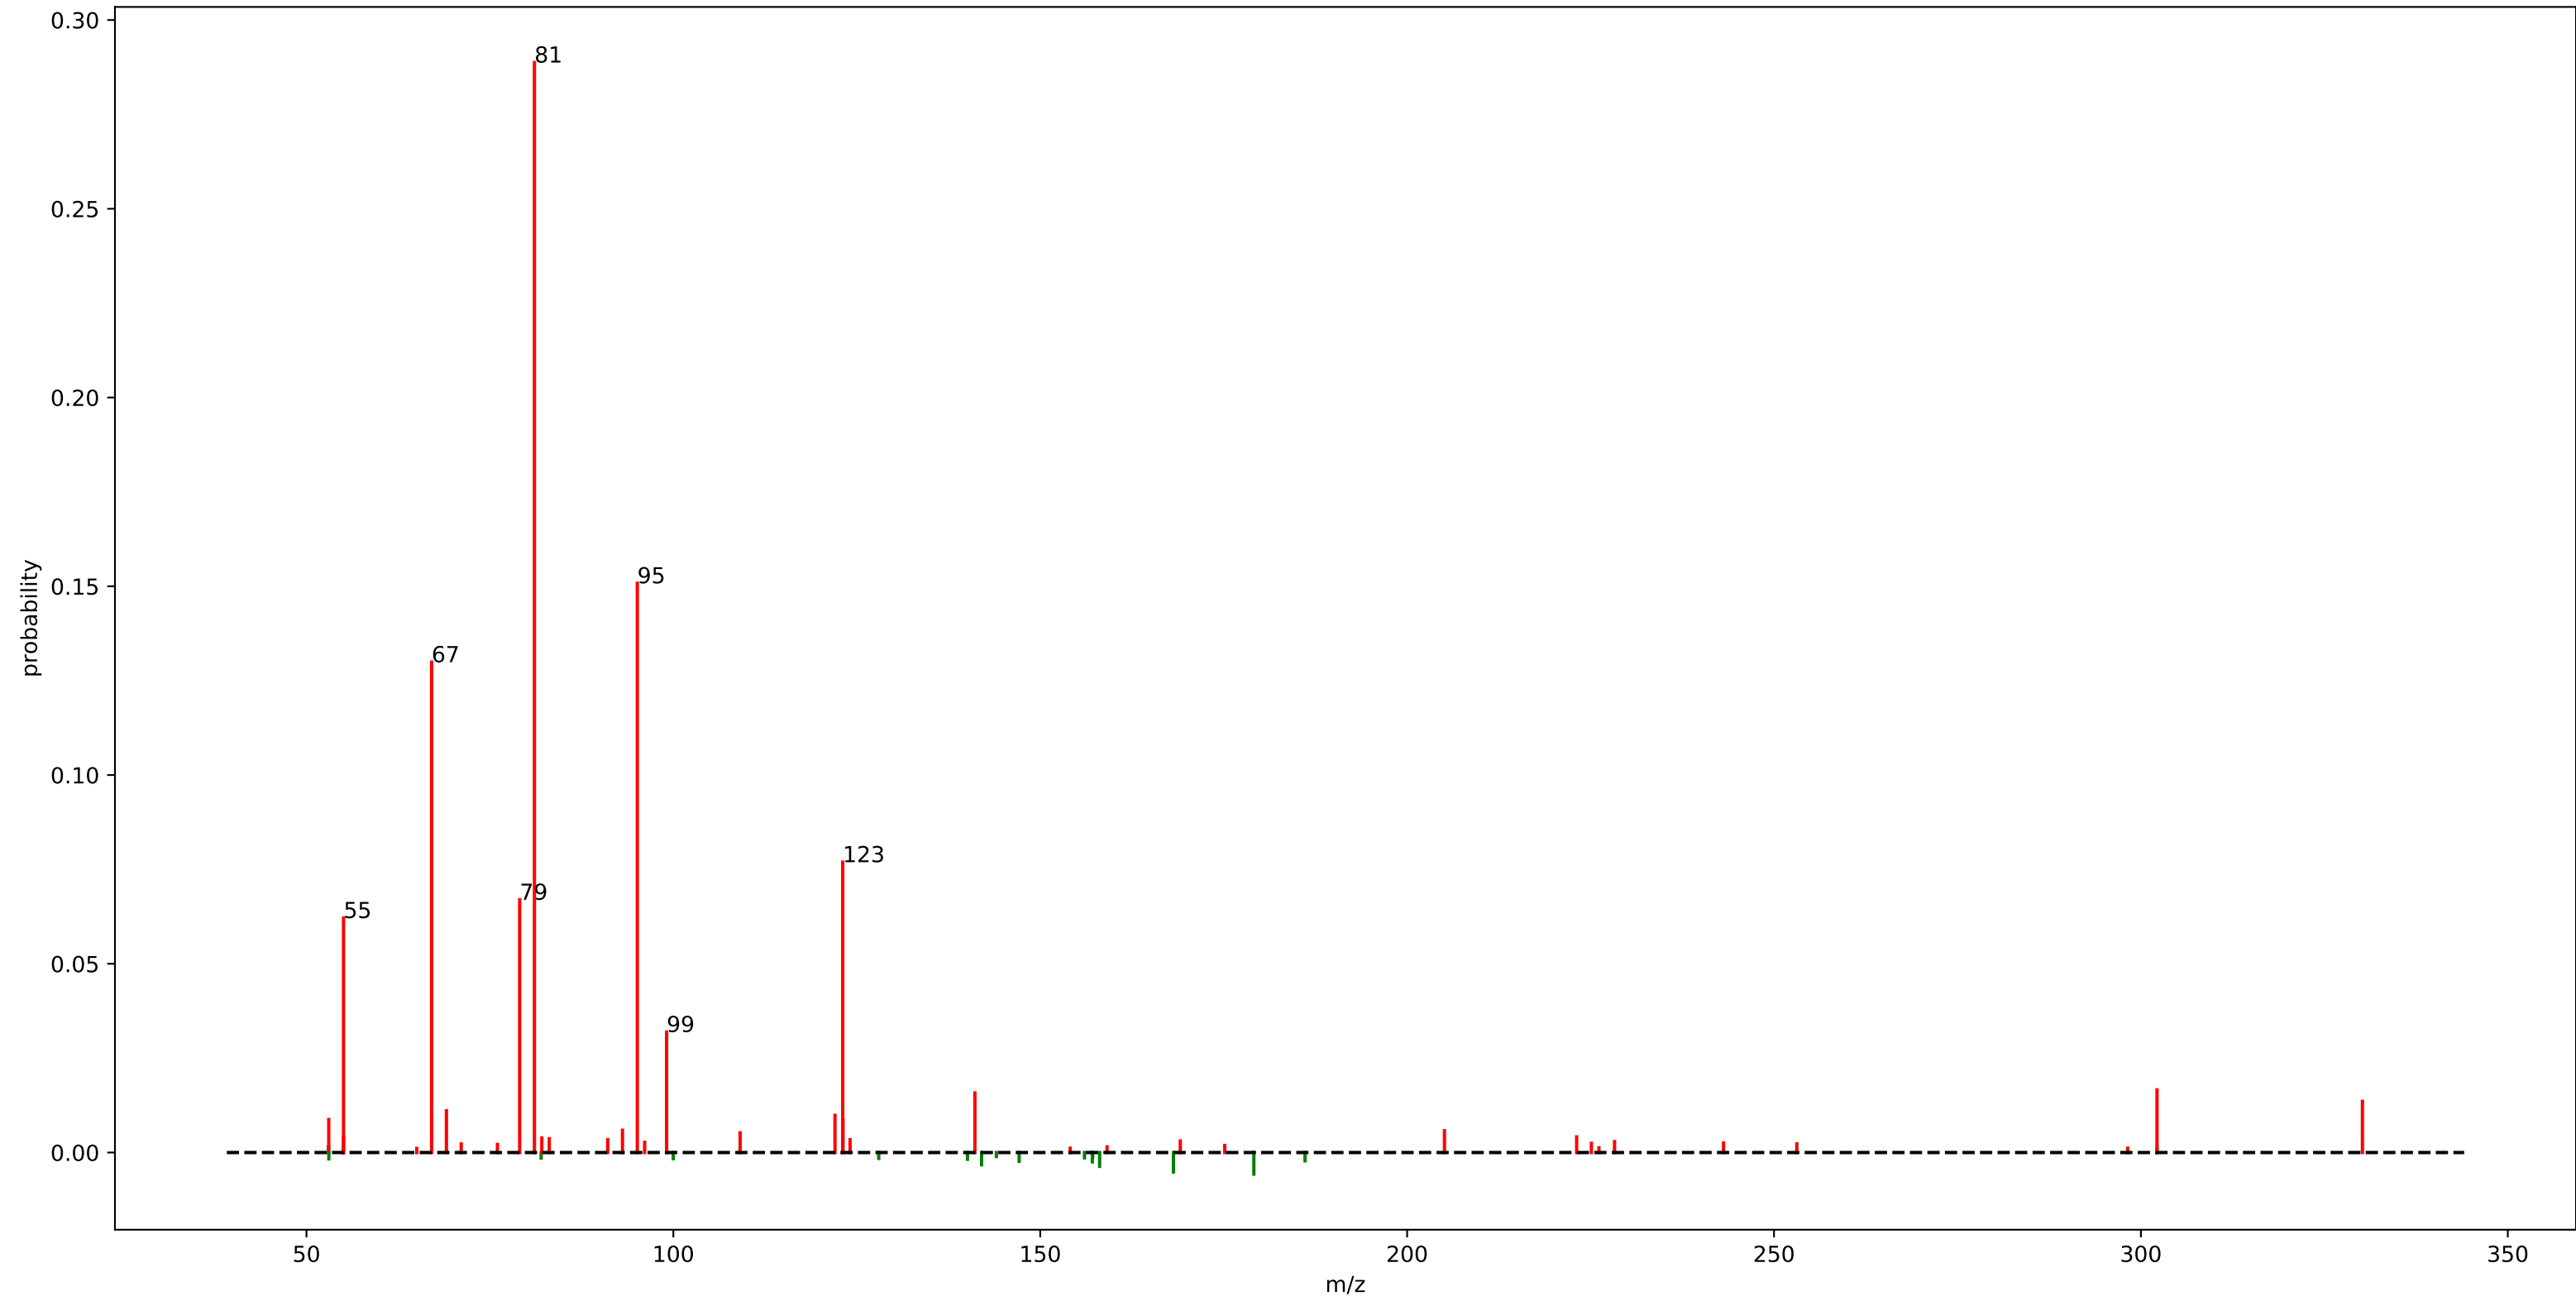

## urine\_mass2motif\_137.m2m

|                   |        |
|-------------------|--------|
| fragment_81.0675  | : 0.29 |
| fragment_95.0875  | : 0.15 |
| fragment_67.0525  | : 0.13 |
| fragment_123.0825 | : 0.08 |
| fragment_79.0525  | : 0.07 |
| fragment_55.0525  | : 0.06 |
| fragment_99.0825  | : 0.03 |
| fragment_302.1975 | : 0.02 |
| fragment_141.0925 | : 0.02 |
| fragment_330.1925 | : 0.01 |
| fragment_69.0725  | : 0.01 |
| fragment_122.0275 | : 0.01 |
| fragment_53.0375  | : 0.01 |
| fragment_123.1175 | : 0.01 |
| fragment_93.0675  | : 0.01 |
| fragment_205.0875 | : 0.01 |
| loss_179.1125     | : 0.01 |
| fragment_109.1025 | : 0.01 |
| loss_168.1525     | : 0.01 |



gnps\_motif\_12.m2m

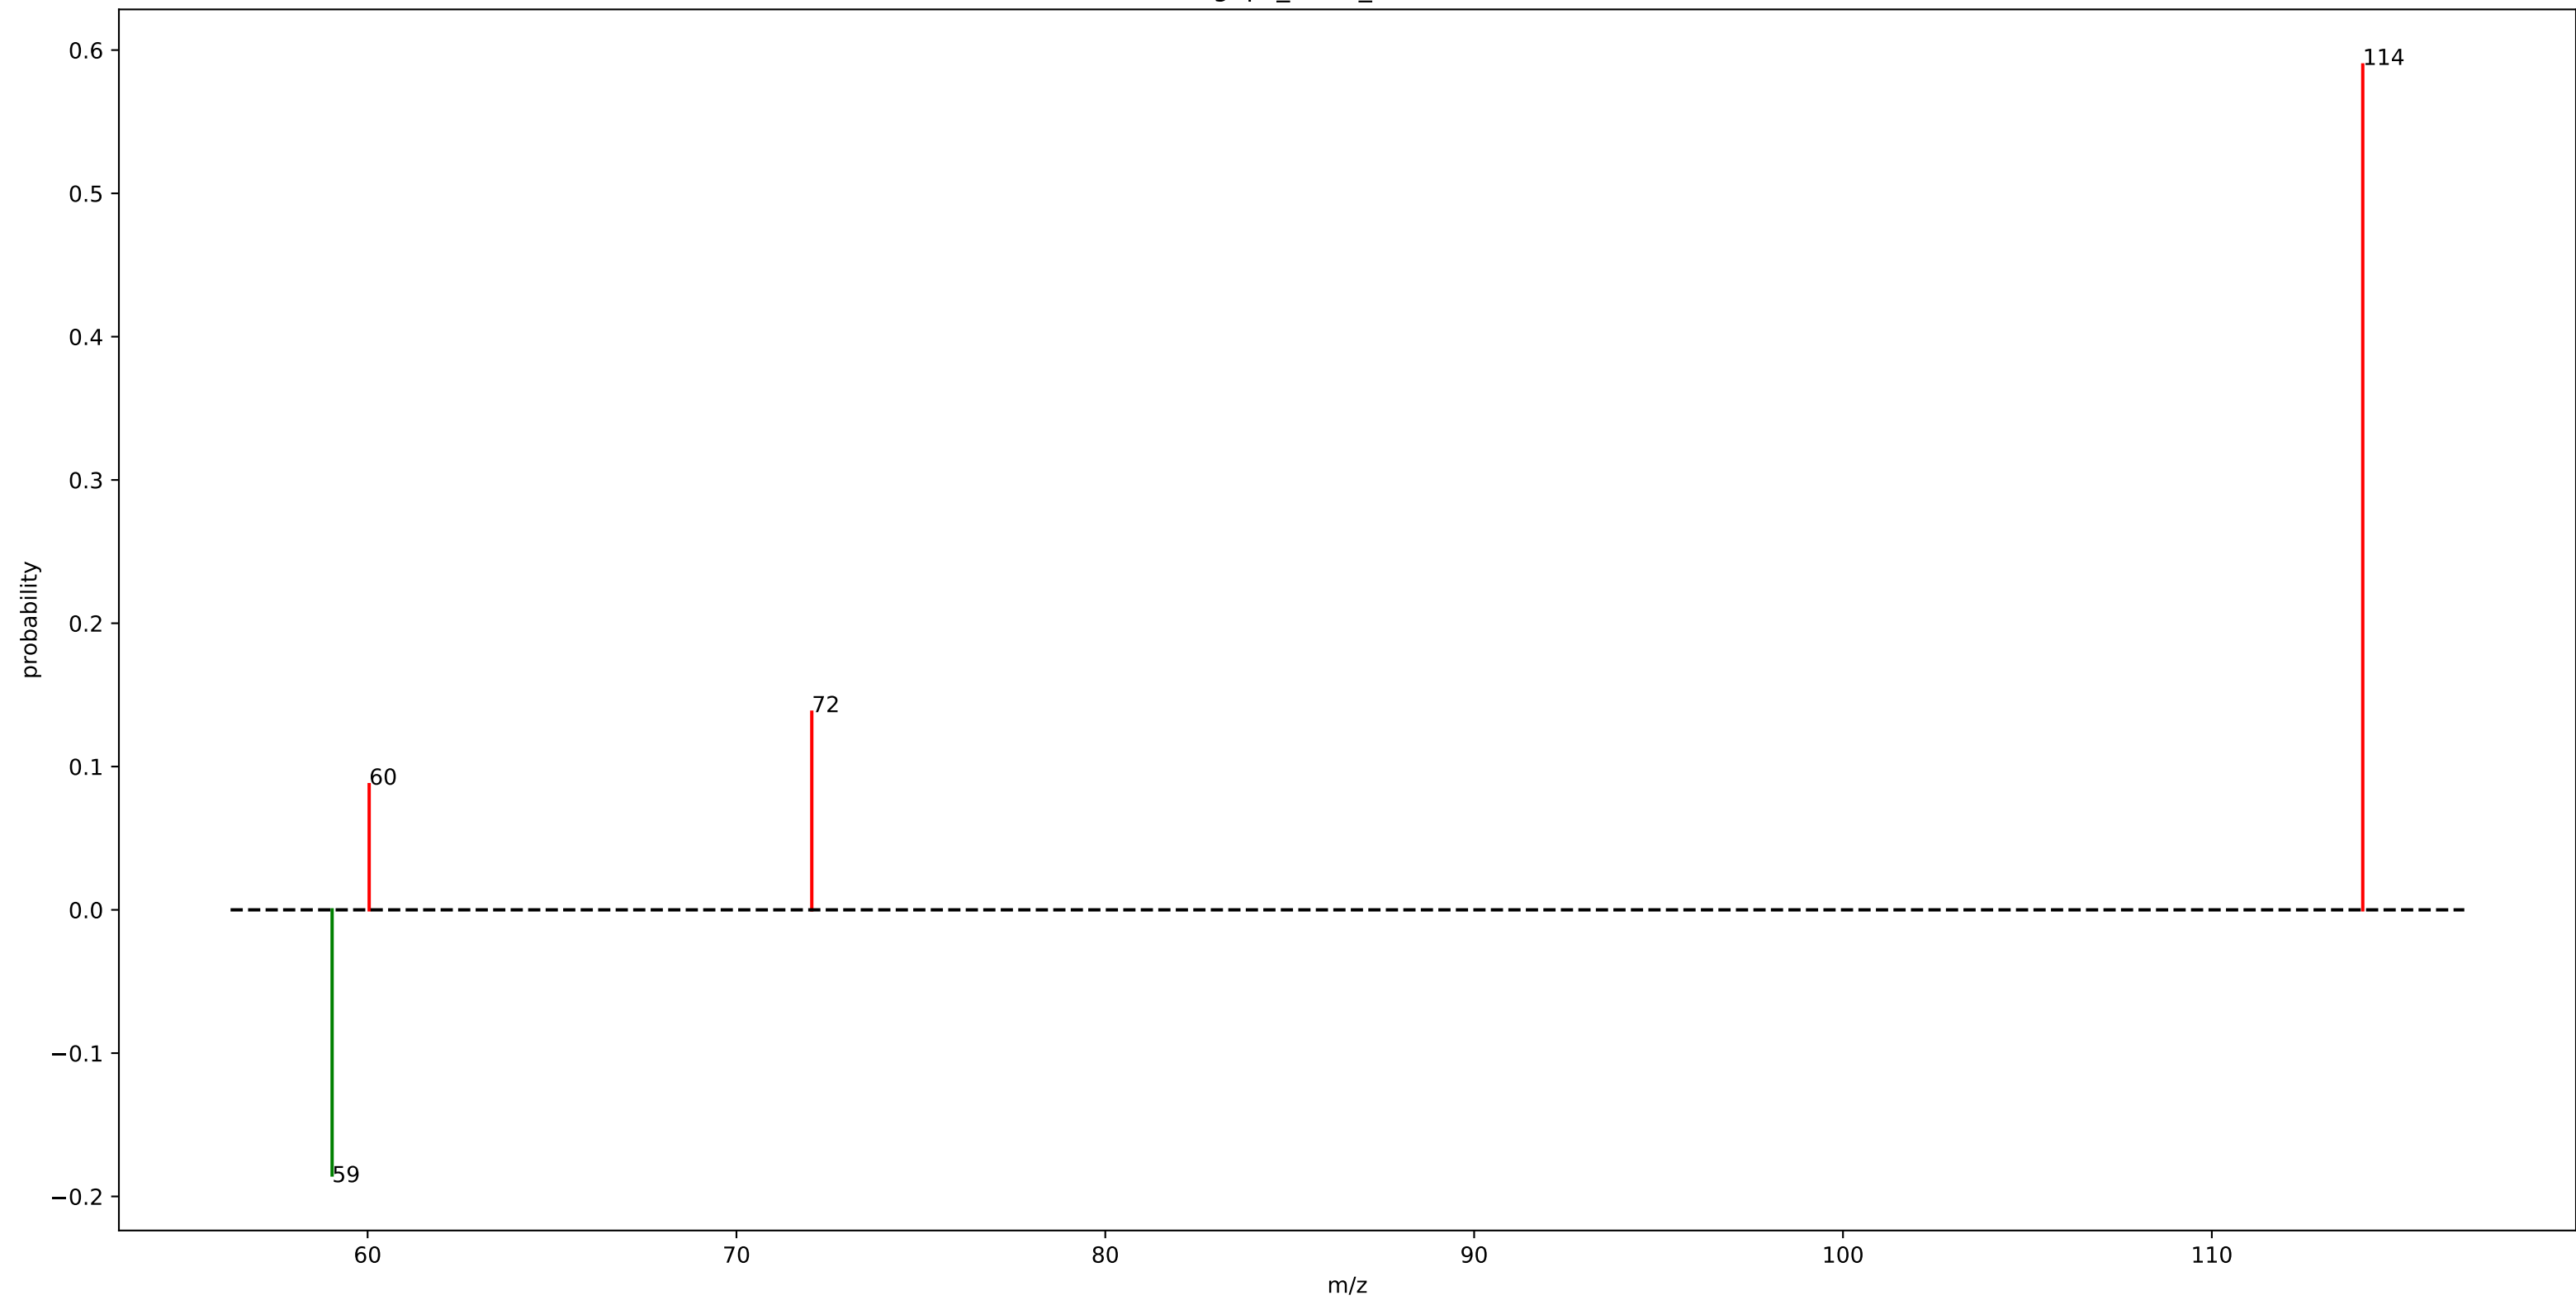

## gnps\_motif\_12.m2m

|                   |        |
|-------------------|--------|
| fragment_114.0925 | : 0.59 |
| loss_59.0375      | : 0.19 |
| fragment_72.0425  | : 0.14 |
| fragment_60.0425  | : 0.09 |

gnps\_motif\_18.m2m

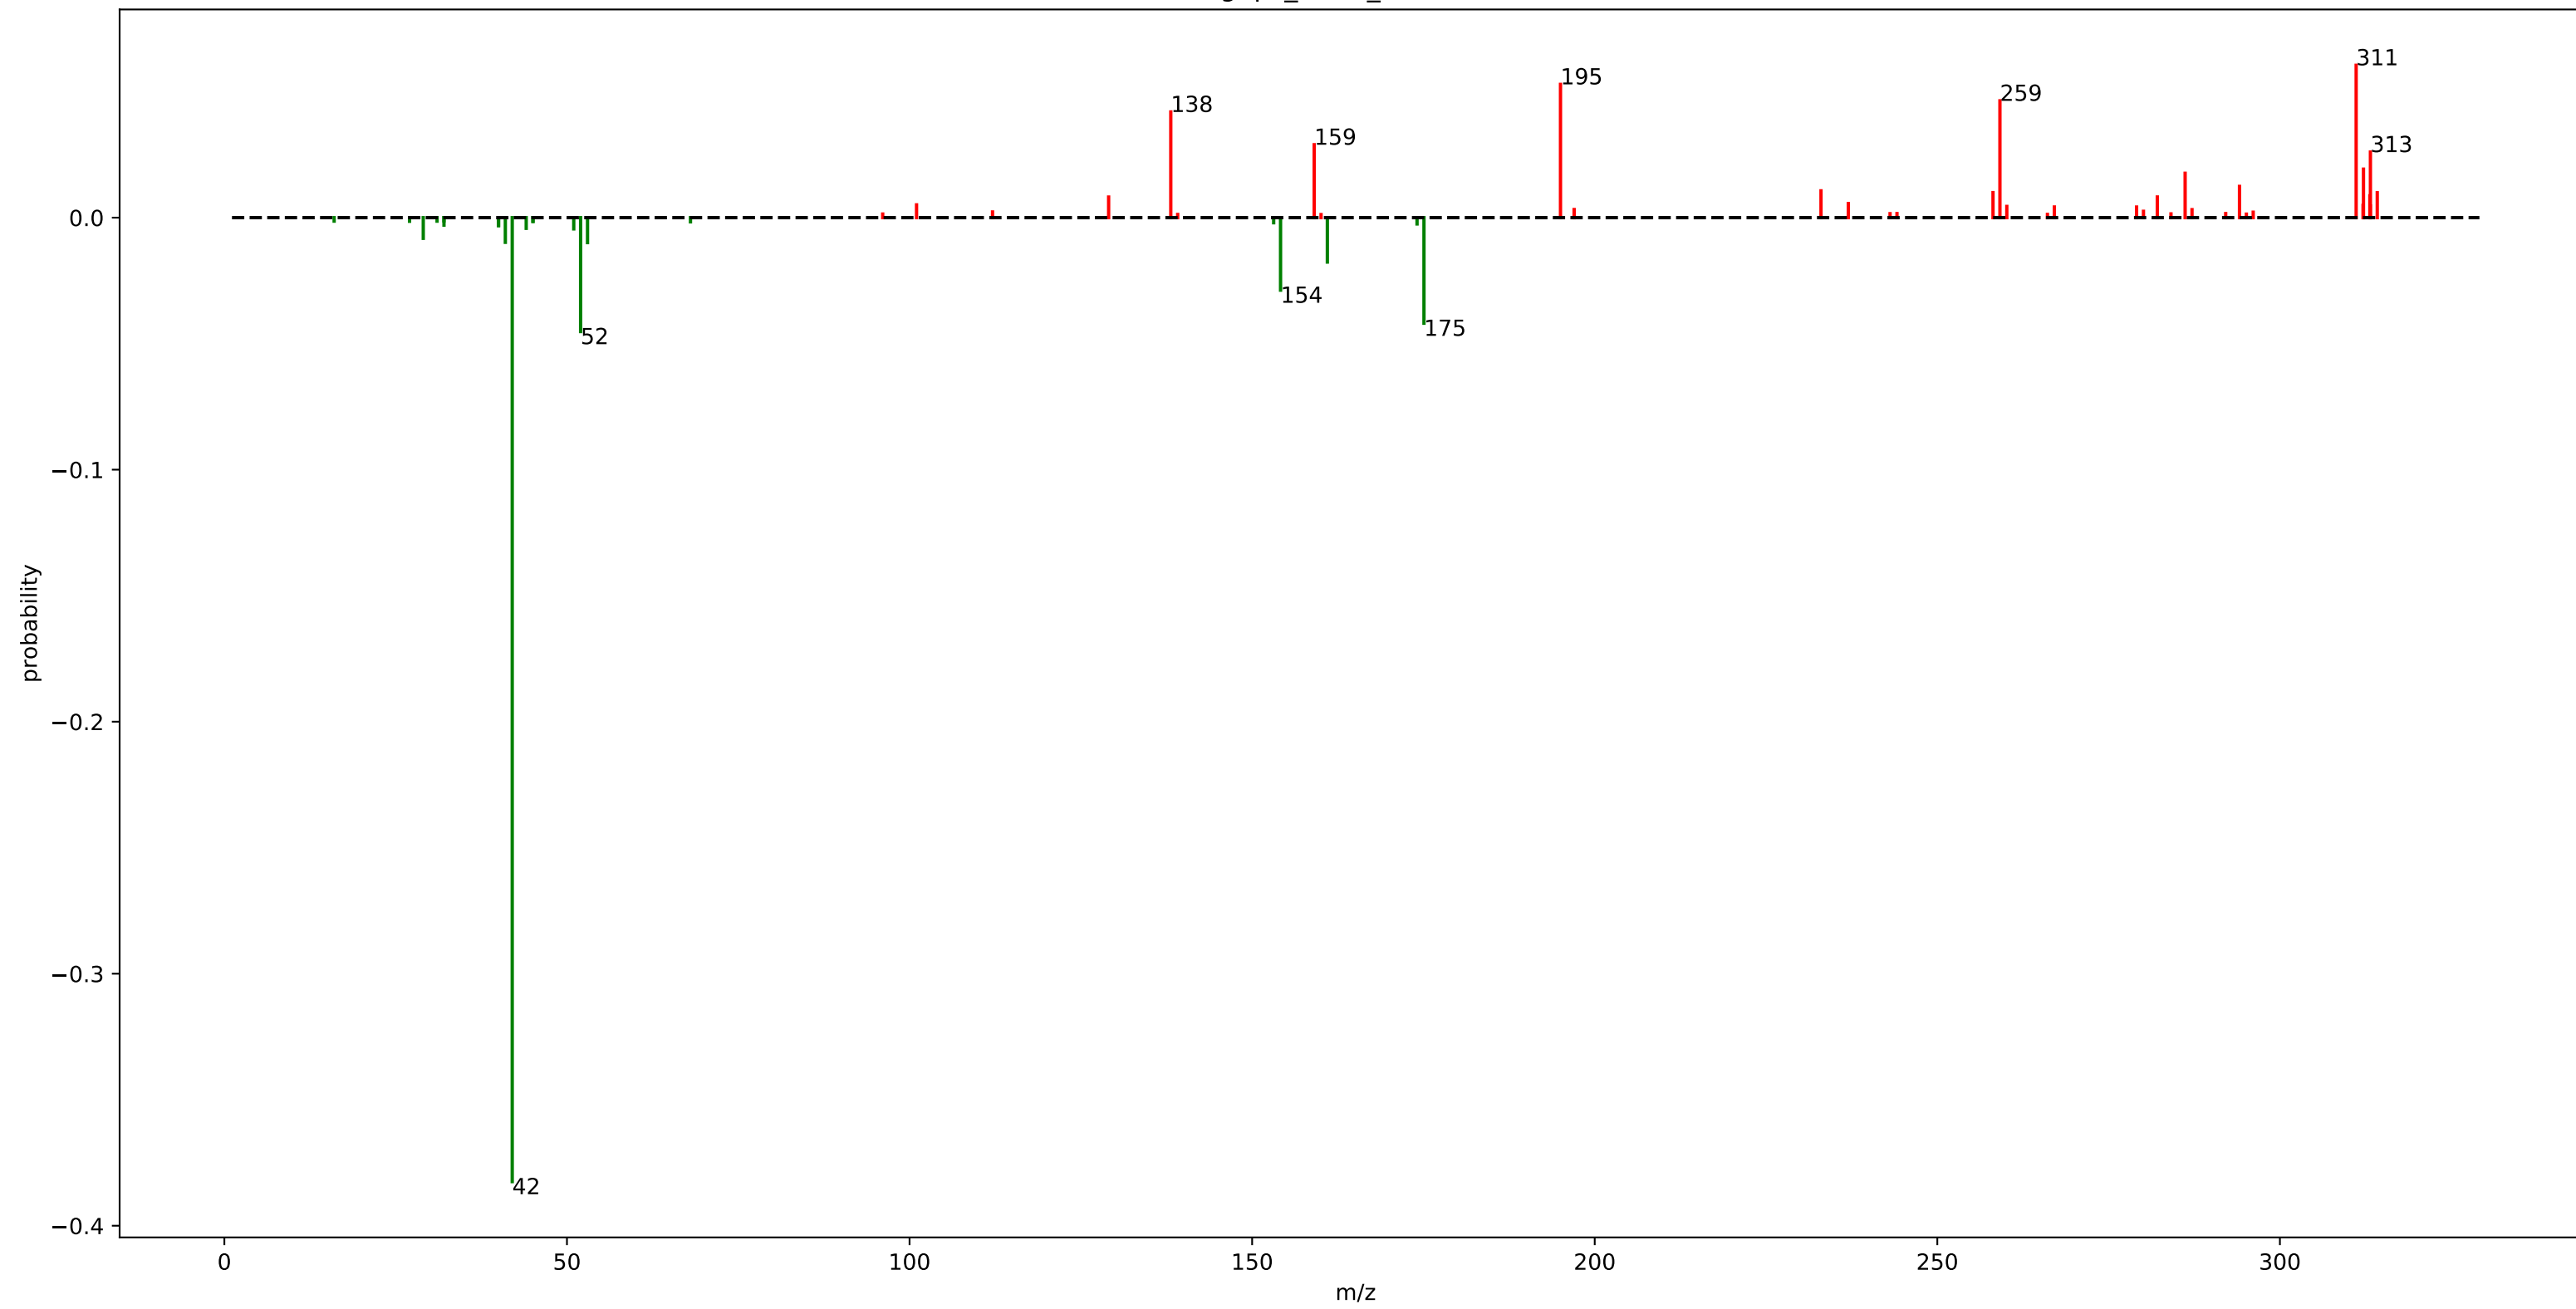

# gnps\_motif\_18.m2m

|                   |        |                   |        |
|-------------------|--------|-------------------|--------|
| loss_42.0125      | : 0.38 | fragment_282.1075 | : 0.01 |
| fragment_311.1275 | : 0.06 | loss_29.0275      | : 0.01 |
| fragment_195.0025 | : 0.05 | fragment_129.0575 | : 0.01 |
| fragment_259.1375 | : 0.05 | fragment_237.0125 | : 0.01 |
| loss_51.9925      | : 0.05 | fragment_101.0225 | : 0.01 |
| fragment_138.1275 | : 0.04 |                   |        |
| loss_175.0775     | : 0.04 |                   |        |
| fragment_159.0575 | : 0.03 |                   |        |
| loss_154.1475     | : 0.03 |                   |        |
| fragment_313.2075 | : 0.03 |                   |        |
| fragment_312.1975 | : 0.02 |                   |        |
| loss_160.9775     | : 0.02 |                   |        |
| fragment_286.1675 | : 0.02 |                   |        |
| fragment_294.1025 | : 0.01 |                   |        |
| fragment_233.0225 | : 0.01 |                   |        |
| fragment_258.1275 | : 0.01 |                   |        |
| loss_53.0025      | : 0.01 |                   |        |
| fragment_314.2075 | : 0.01 |                   |        |
| loss_41.0075      | : 0.01 |                   |        |
| fragment_313.1275 | : 0.01 |                   |        |

euphorbia\_motif\_476.m2m

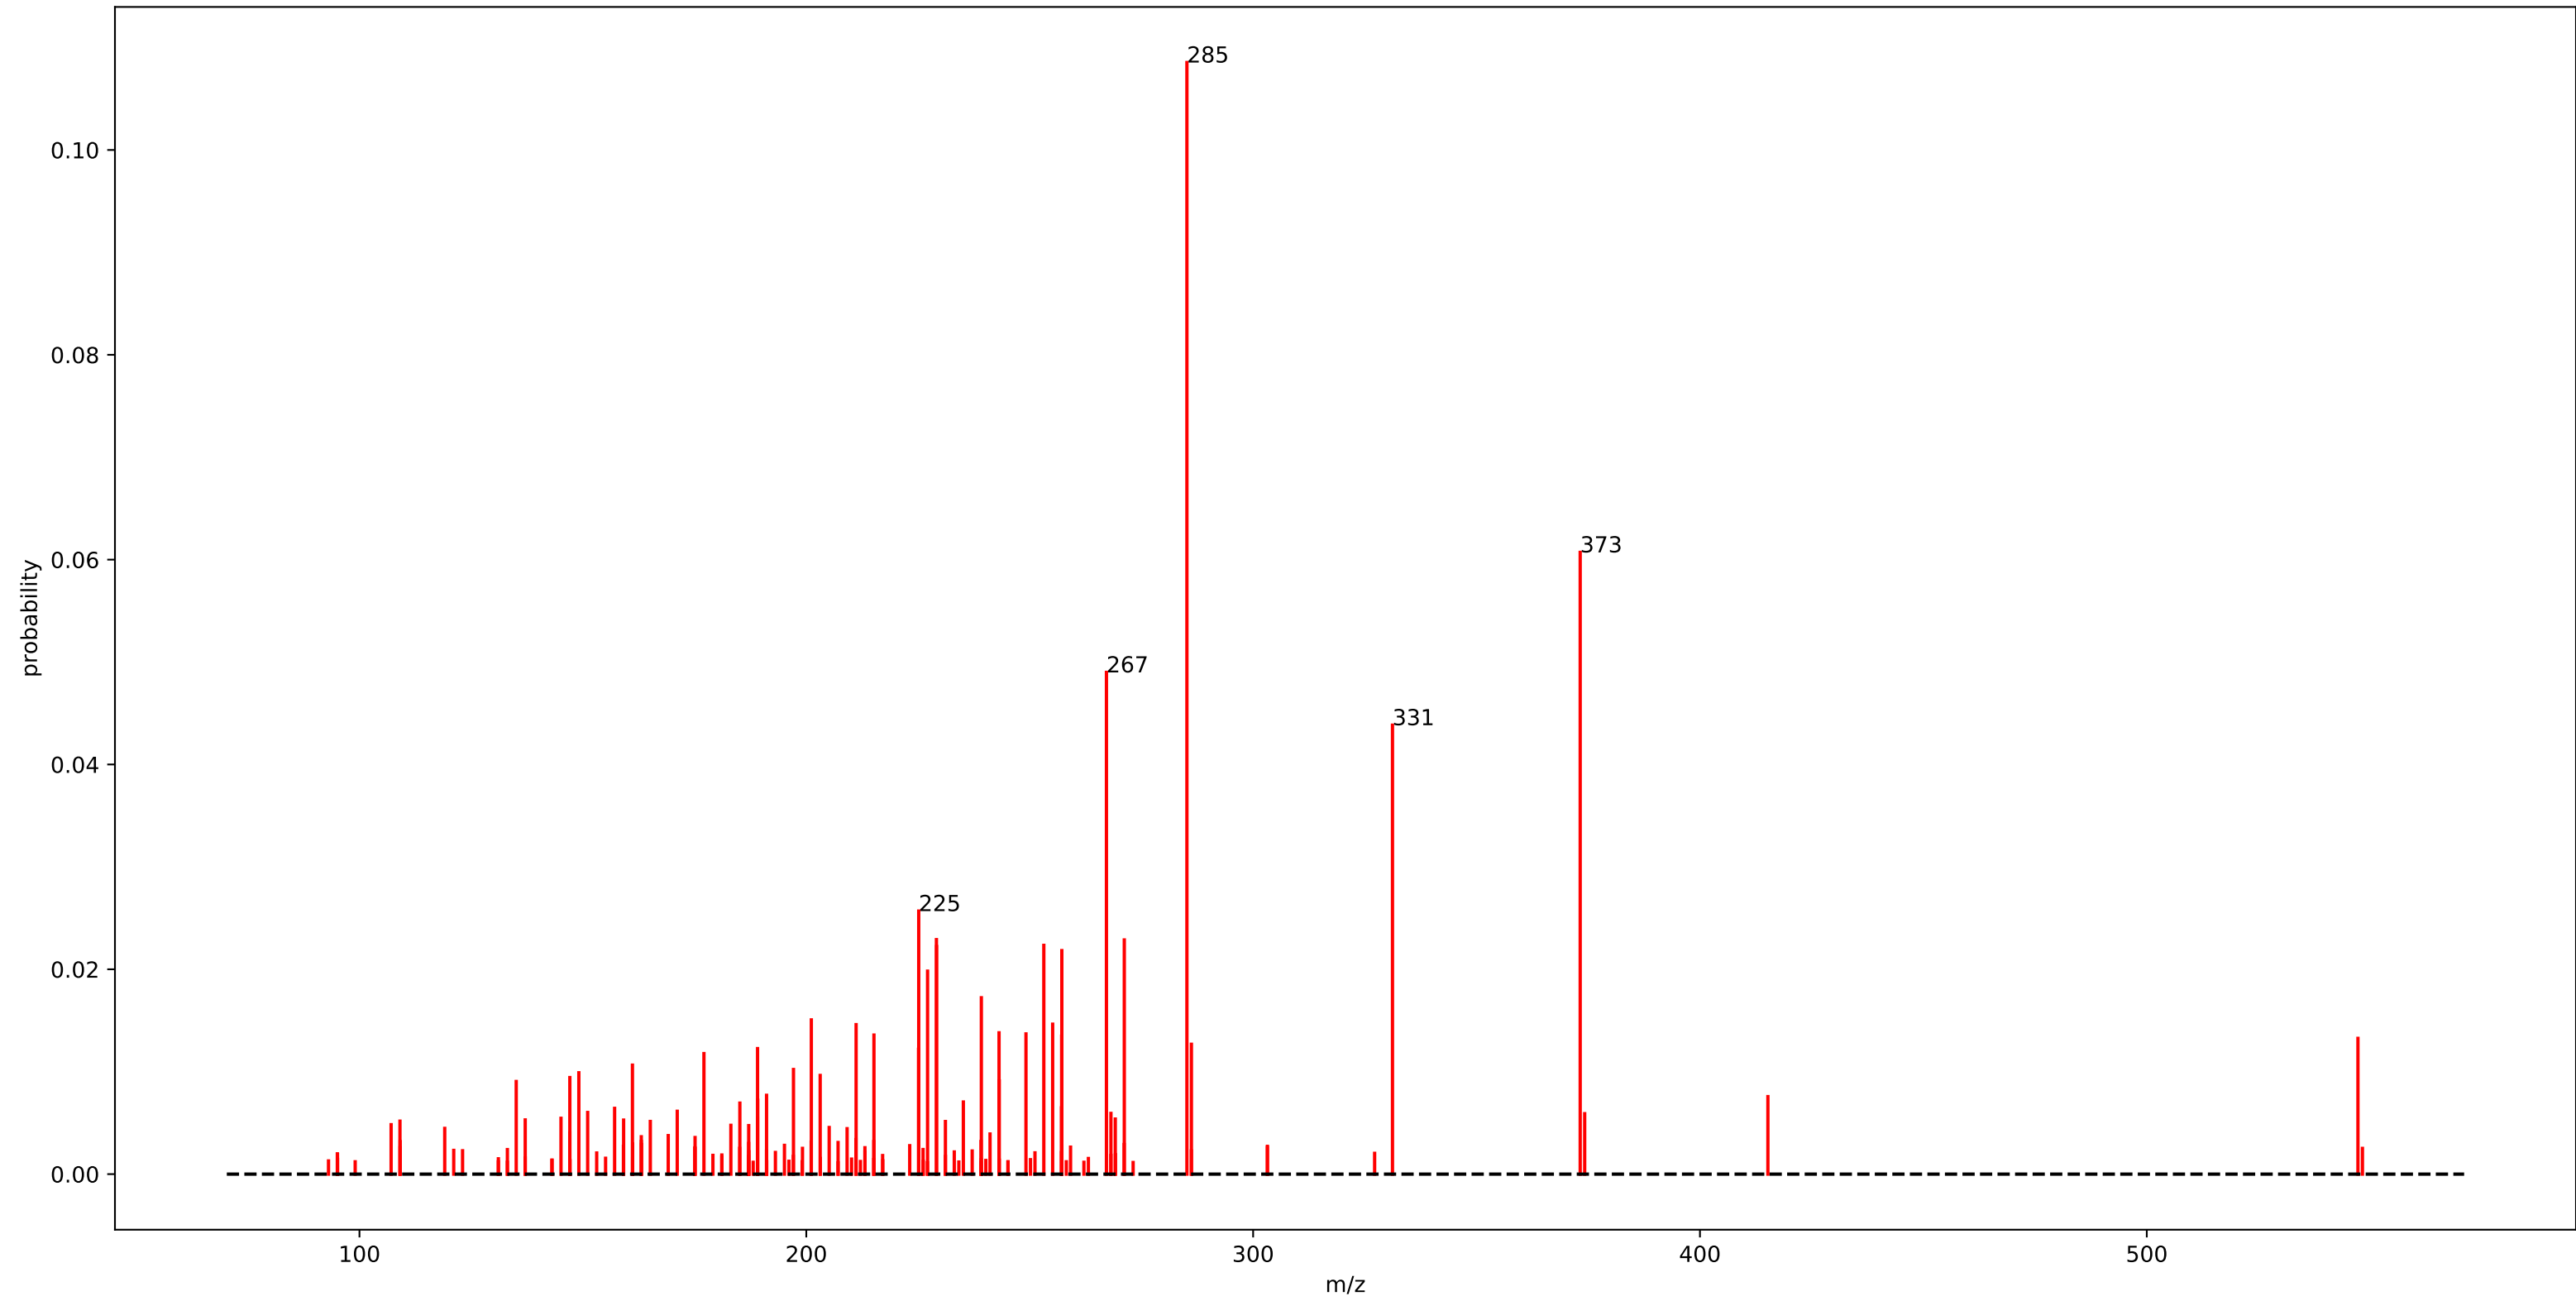

# euphorbia\_motif\_476.m2m

|                   |        |                   |        |                   |        |
|-------------------|--------|-------------------|--------|-------------------|--------|
| fragment_285.1825 | : 0.11 | fragment_286.1875 | : 0.01 | fragment_268.1775 | : 0.01 |
| fragment_373.1975 | : 0.06 | fragment_189.0925 | : 0.01 | fragment_374.2025 | : 0.01 |
| fragment_267.1725 | : 0.05 | fragment_225.1275 | : 0.01 | fragment_145.1025 | : 0.01 |
| fragment_331.1875 | : 0.04 | fragment_177.0925 | : 0.01 | fragment_189.0875 | : 0.01 |
| fragment_225.1625 | : 0.03 | fragment_161.0925 | : 0.01 | fragment_269.1525 | : 0.01 |
| fragment_229.1225 | : 0.02 | fragment_197.1325 | : 0.01 | fragment_137.0975 | : 0.01 |
| fragment_271.1675 | : 0.02 | fragment_149.0975 | : 0.01 | fragment_159.1175 | : 0.01 |
| fragment_253.1575 | : 0.02 | fragment_203.1075 | : 0.01 | fragment_109.0625 | : 0.01 |
| fragment_229.1575 | : 0.02 | fragment_147.0825 | : 0.01 | fragment_165.0925 | : 0.01 |
| fragment_257.1875 | : 0.02 | fragment_243.1725 | : 0.01 | fragment_231.1375 | : 0.01 |
| fragment_227.1425 | : 0.02 | fragment_135.0825 | : 0.01 |                   |        |
| fragment_239.1775 | : 0.02 | fragment_191.1075 | : 0.01 |                   |        |
| fragment_201.1275 | : 0.02 | fragment_415.2075 | : 0.01 |                   |        |
| fragment_255.1375 | : 0.01 | fragment_189.1275 | : 0.01 |                   |        |
| fragment_211.1475 | : 0.01 | fragment_235.1475 | : 0.01 |                   |        |
| fragment_243.1375 | : 0.01 | fragment_185.1325 | : 0.01 |                   |        |
| fragment_249.1625 | : 0.01 | fragment_257.1175 | : 0.01 |                   |        |
| fragment_215.1425 | : 0.01 | fragment_157.1025 | : 0.01 |                   |        |
| fragment_257.1525 | : 0.01 | fragment_171.1175 | : 0.01 |                   |        |
| fragment_547.2575 | : 0.01 | fragment_151.0725 | : 0.01 |                   |        |

urine\_mass2motif\_95.m2m

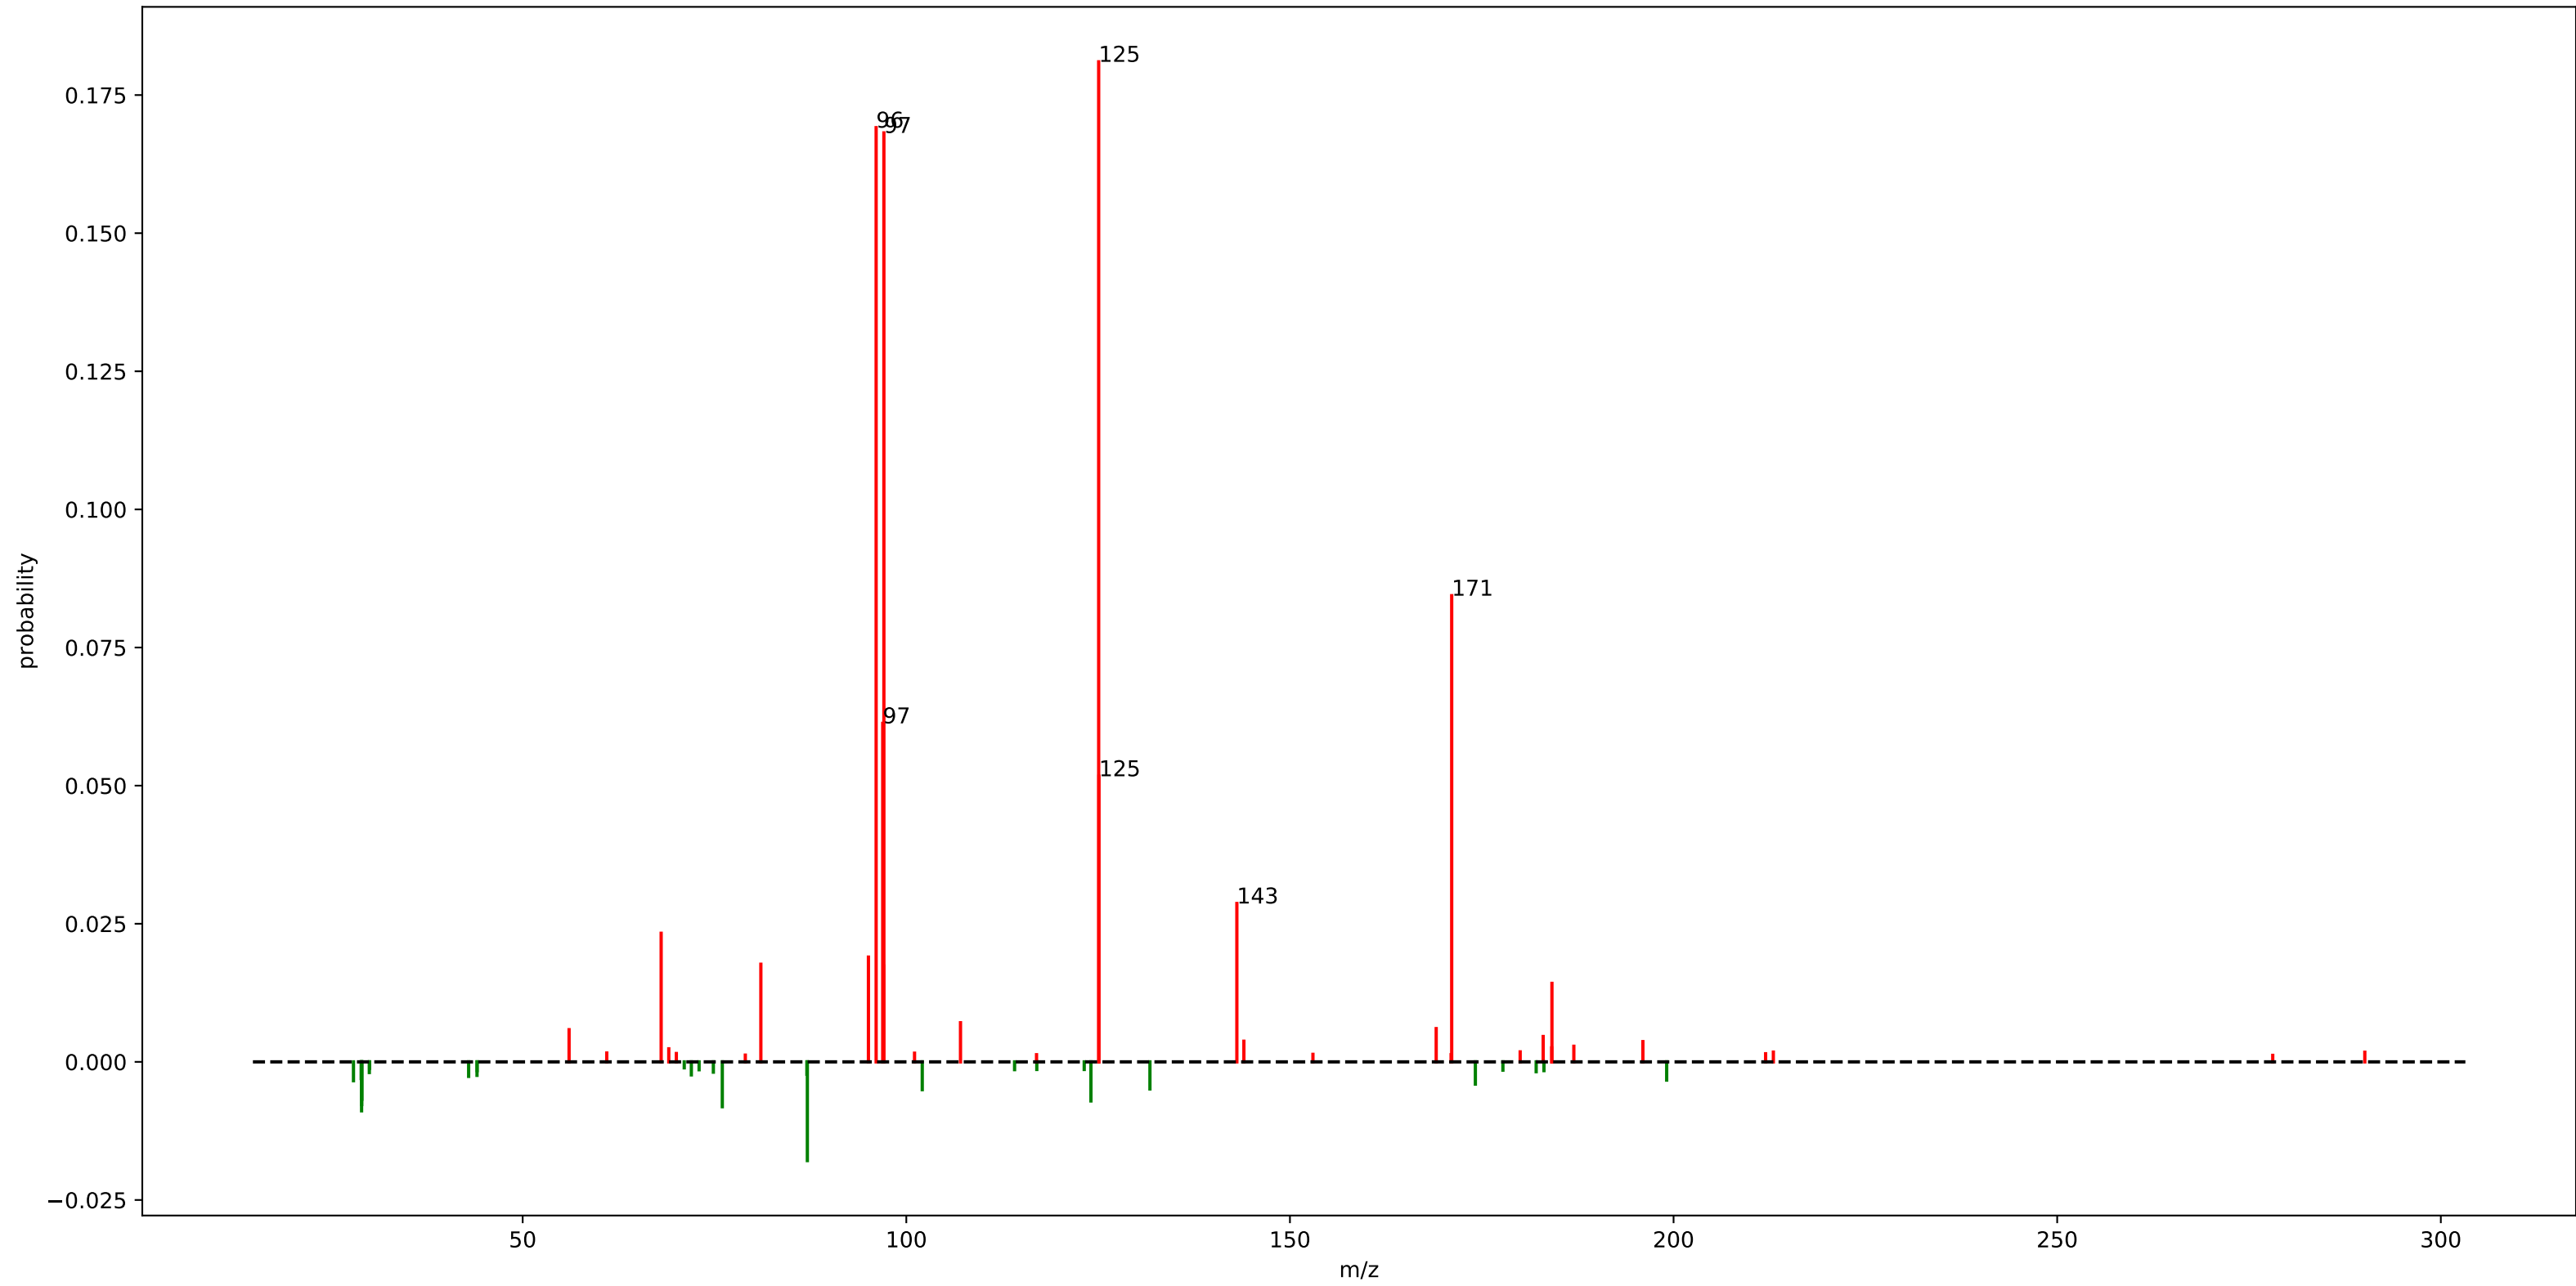

# urine\_mass2motif\_95.m2m

|                   |        |                  |        |
|-------------------|--------|------------------|--------|
| fragment_125.0725 | : 0.18 | fragment_56.0475 | : 0.01 |
| fragment_96.0675  | : 0.17 | loss_102.0775    | : 0.01 |
| fragment_97.0775  | : 0.17 |                  |        |
| fragment_171.0825 | : 0.08 |                  |        |
| fragment_96.9275  | : 0.06 |                  |        |
| fragment_125.1075 | : 0.05 |                  |        |
| fragment_143.0825 | : 0.03 |                  |        |
| fragment_68.0475  | : 0.02 |                  |        |
| fragment_95.0625  | : 0.02 |                  |        |
| loss_87.1025      | : 0.02 |                  |        |
| fragment_81.0425  | : 0.02 |                  |        |
| fragment_97.0375  | : 0.02 |                  |        |
| fragment_184.1475 | : 0.01 |                  |        |
| loss_29.0025      | : 0.01 |                  |        |
| loss_76.0175      | : 0.01 |                  |        |
| loss_29.0225      | : 0.01 |                  |        |
| fragment_107.0625 | : 0.01 |                  |        |
| loss_124.0625     | : 0.01 |                  |        |
| loss_29.0375      | : 0.01 |                  |        |
| fragment_169.0625 | : 0.01 |                  |        |



mb\_motif\_28.m2m

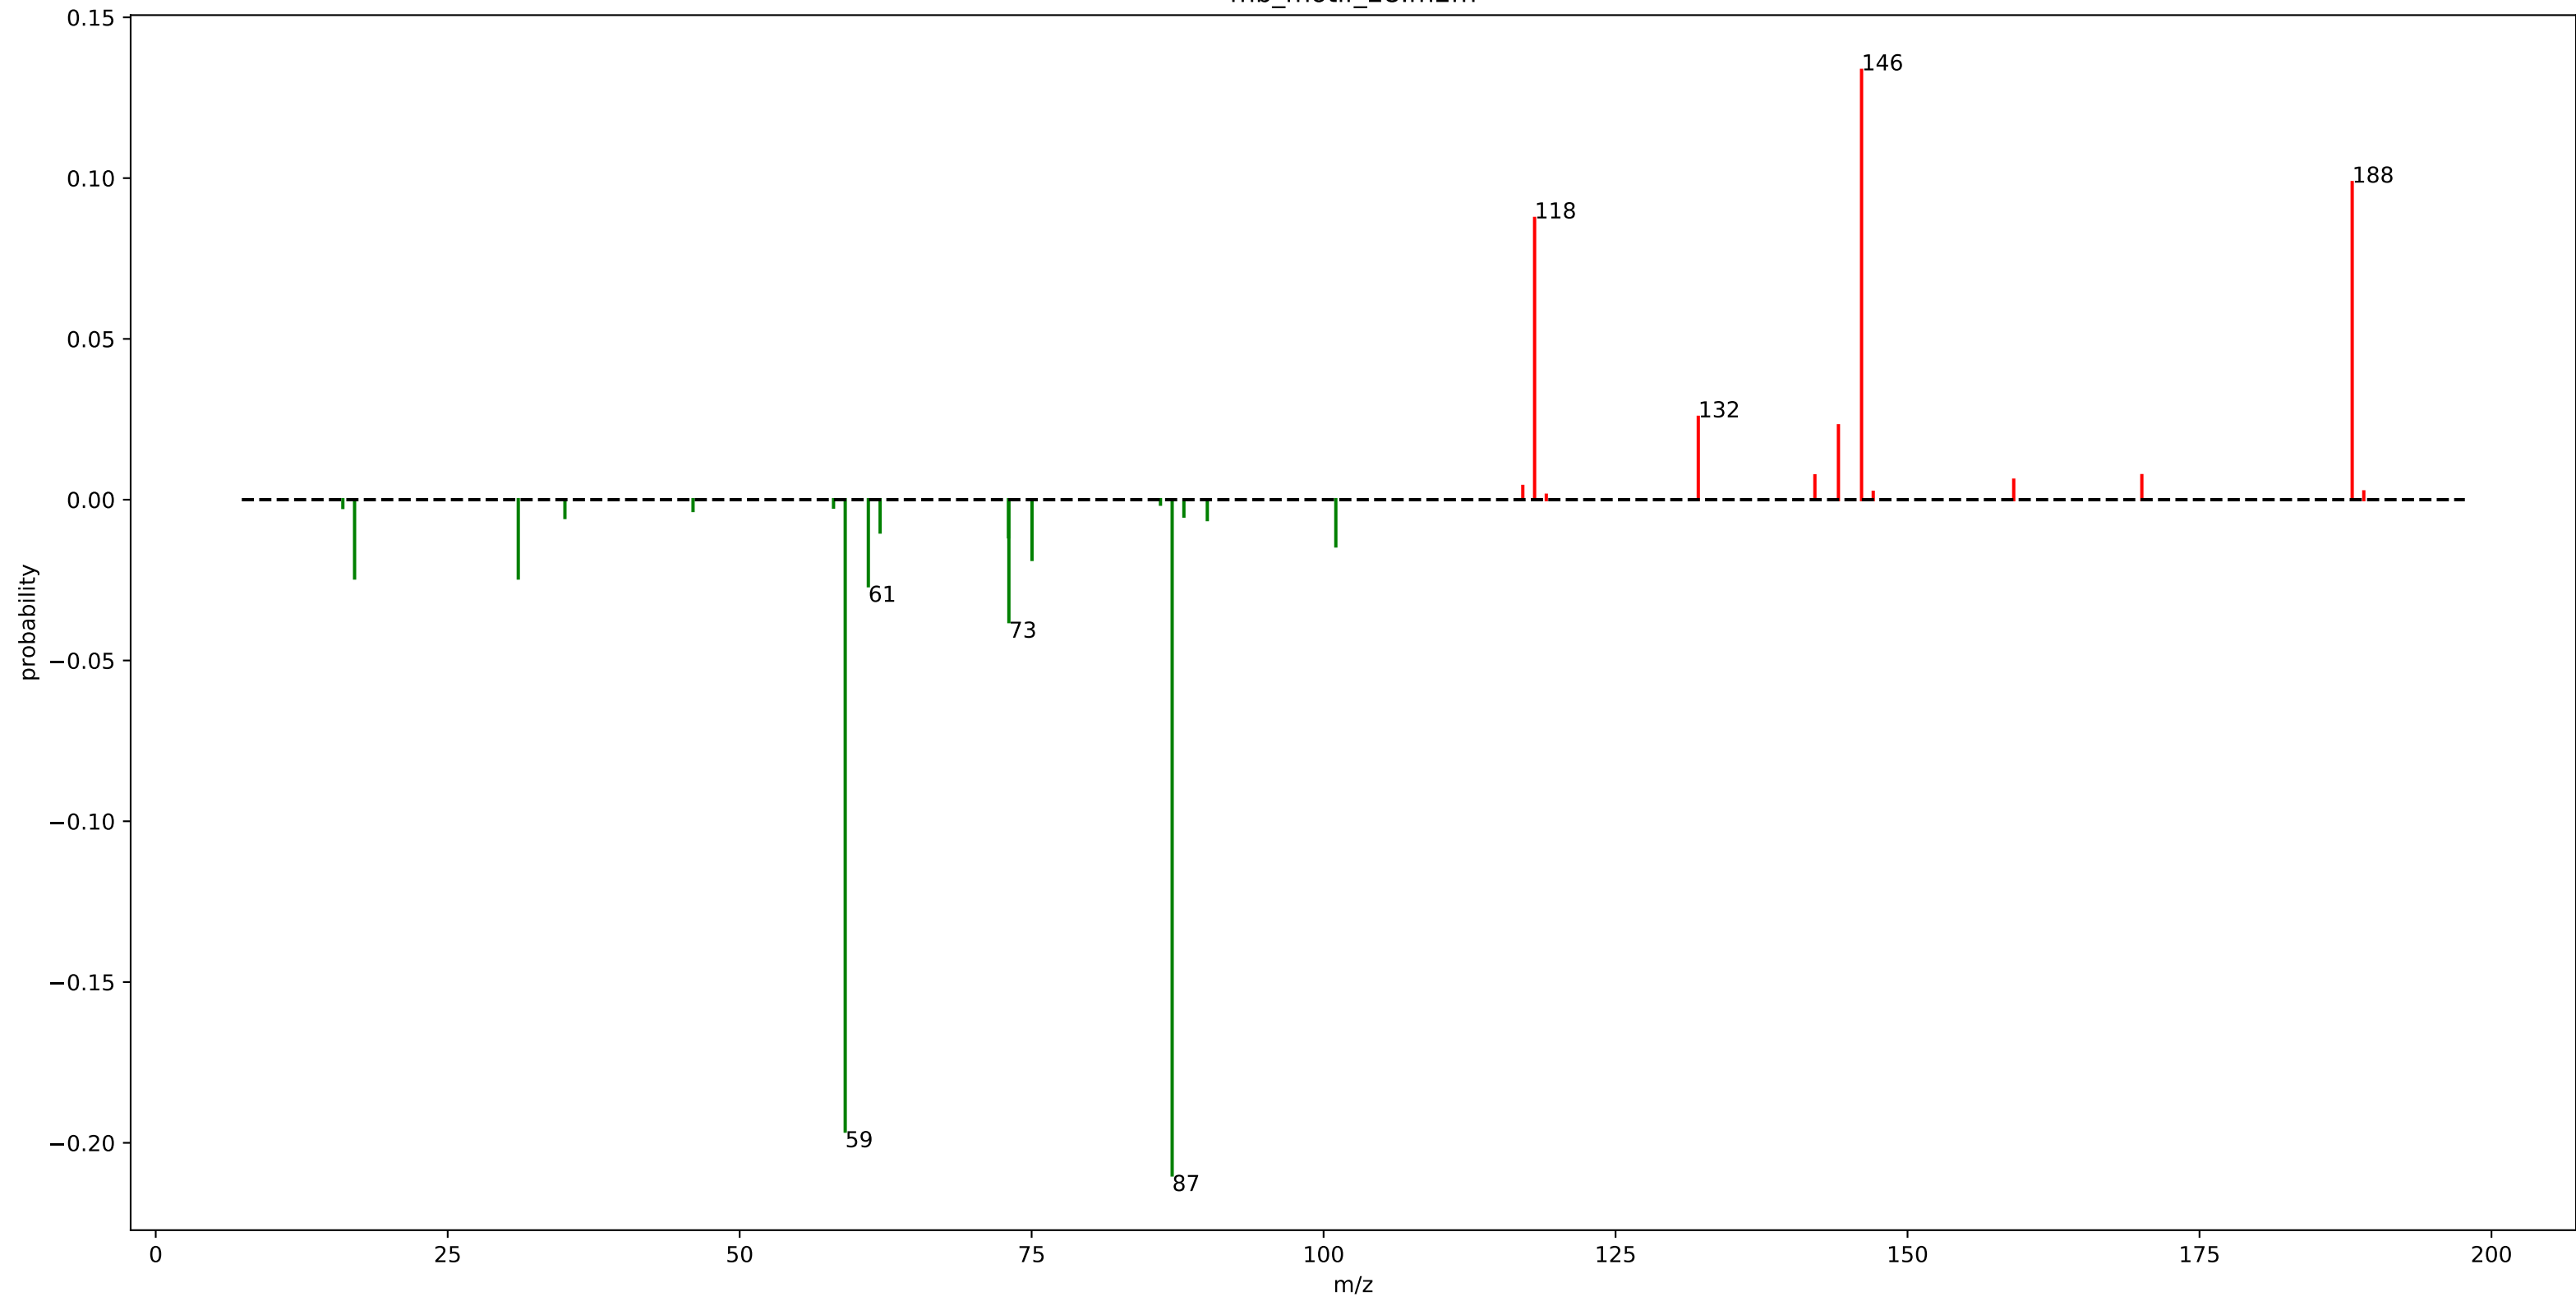

# mb\_motif\_28.m2m

|                   |        |              |        |
|-------------------|--------|--------------|--------|
| loss_87.0325      | : 0.21 | loss_88.0375 | : 0.01 |
| loss_59.0375      | : 0.20 |              |        |
| fragment_146.0625 | : 0.13 |              |        |
| fragment_188.0725 | : 0.10 |              |        |
| fragment_118.0675 | : 0.09 |              |        |
| loss_73.0525      | : 0.04 |              |        |
| loss_61.0175      | : 0.03 |              |        |
| fragment_132.0825 | : 0.03 |              |        |
| loss_31.0425      | : 0.02 |              |        |
| loss_17.0275      | : 0.02 |              |        |
| fragment_144.0825 | : 0.02 |              |        |
| loss_75.0325      | : 0.02 |              |        |
| loss_101.0475     | : 0.01 |              |        |
| loss_73.0175      | : 0.01 |              |        |
| loss_62.0275      | : 0.01 |              |        |
| fragment_170.0625 | : 0.01 |              |        |
| fragment_142.0675 | : 0.01 |              |        |
| loss_90.0425      | : 0.01 |              |        |
| fragment_159.0925 | : 0.01 |              |        |
| loss_35.0375      | : 0.01 |              |        |

motif\_575

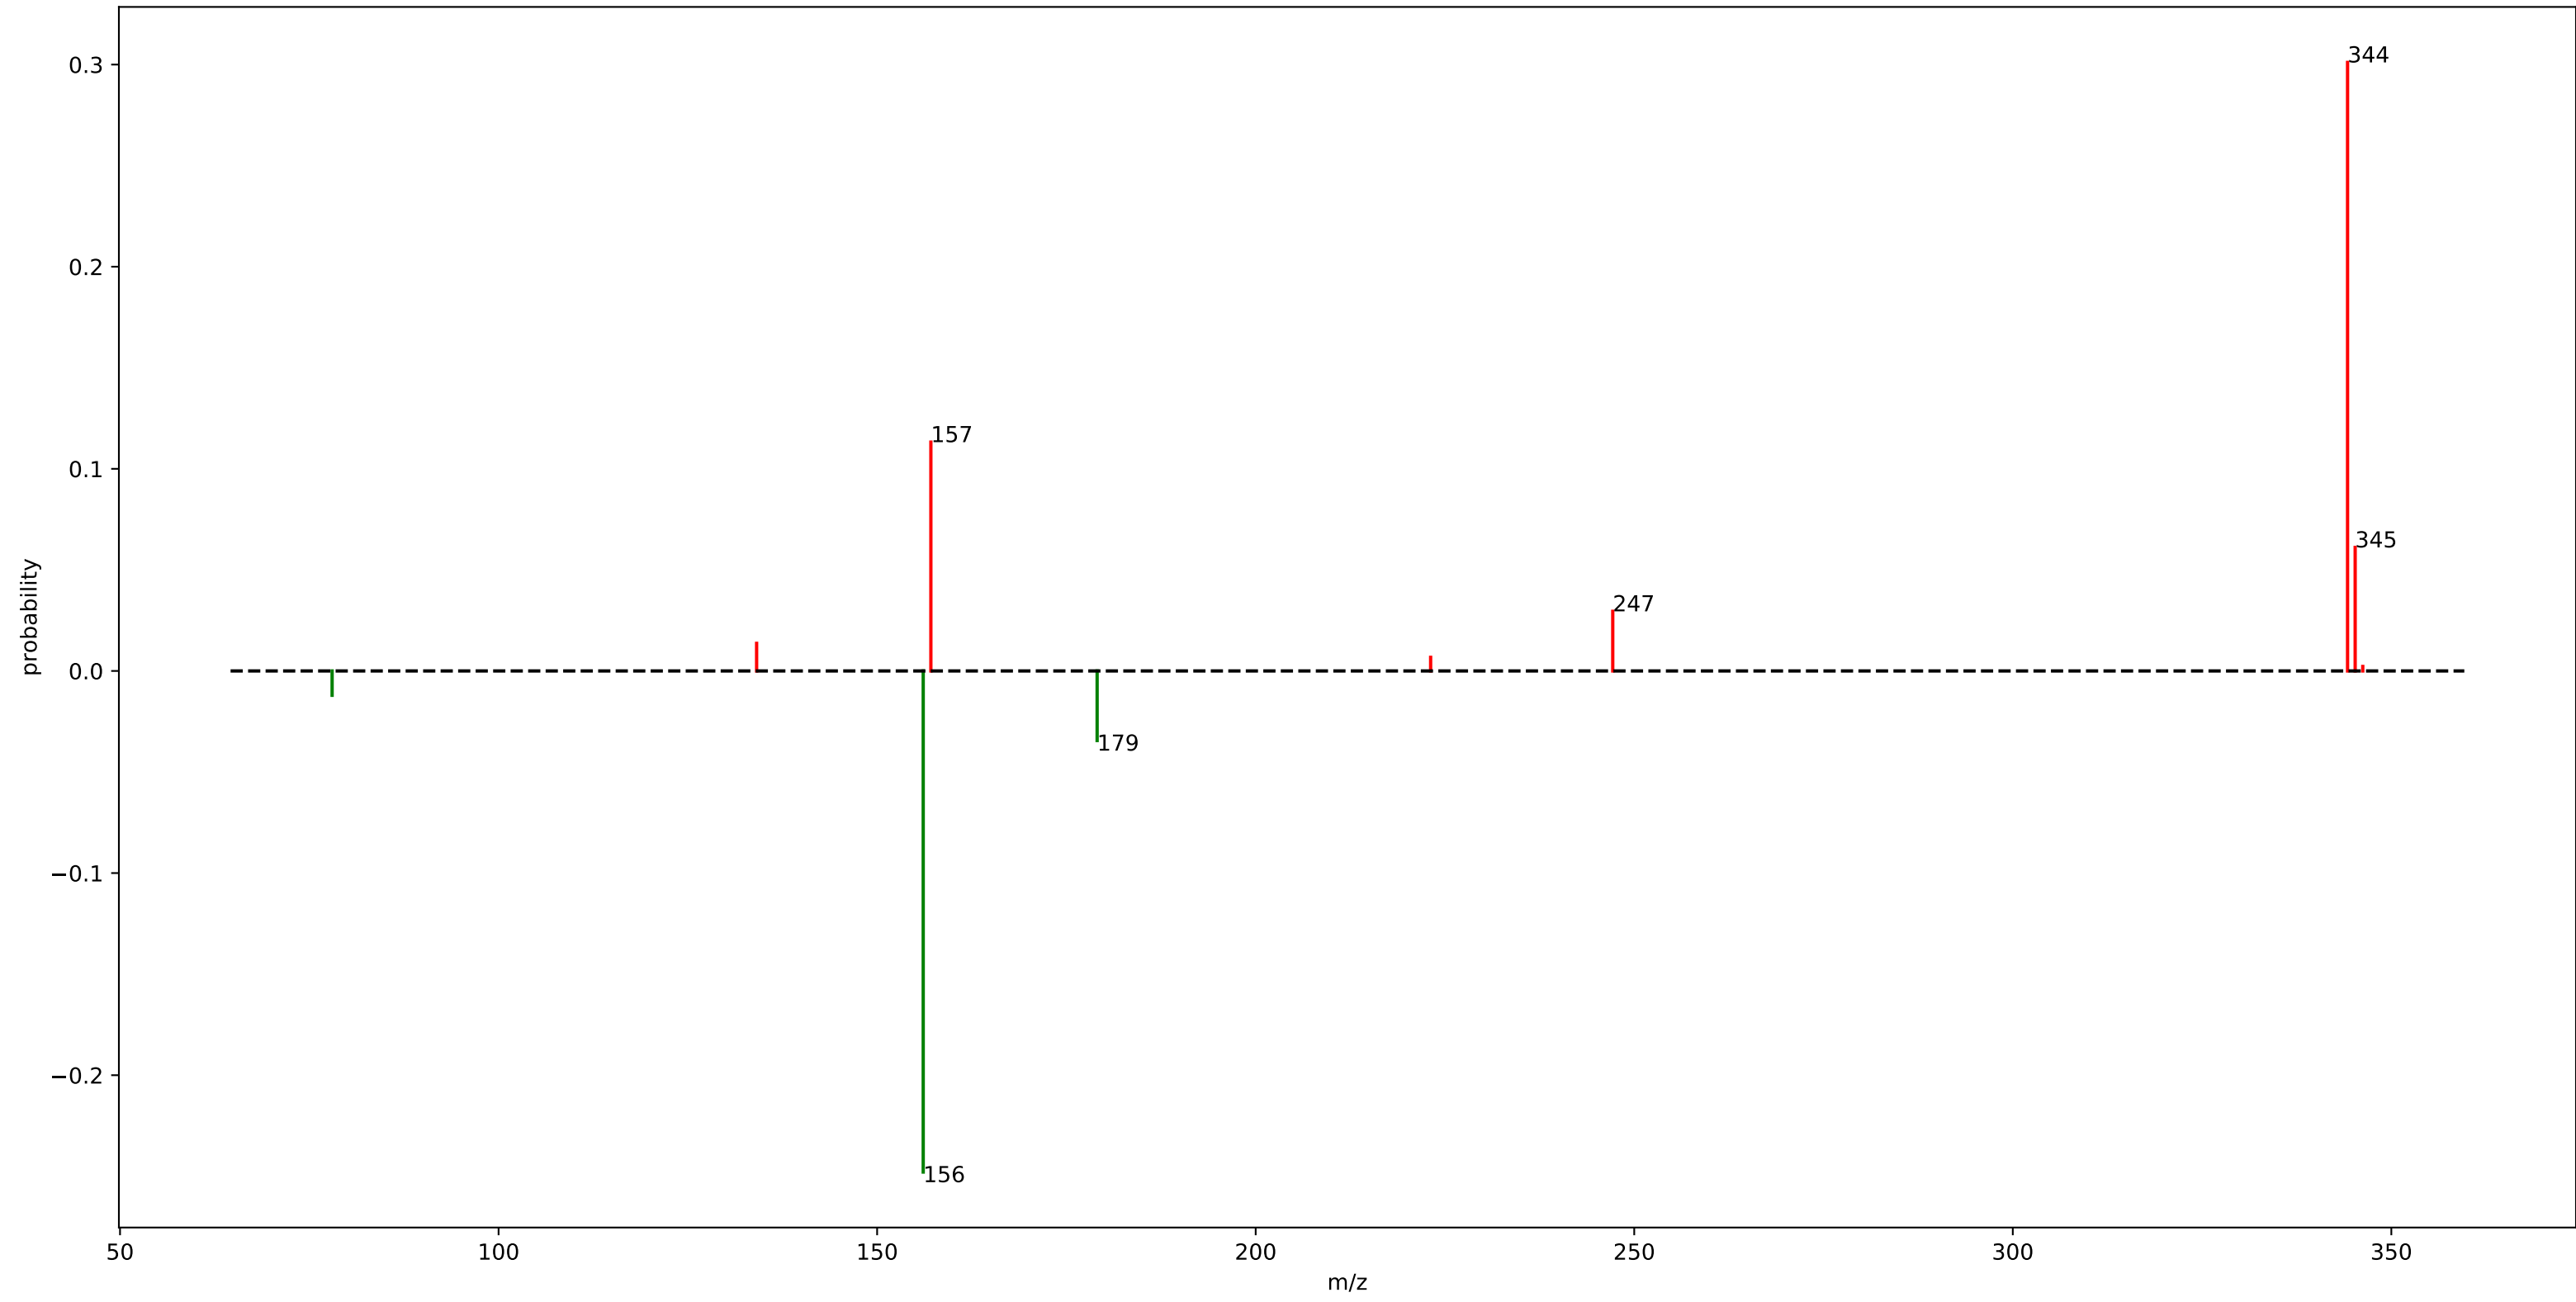

## motif\_575

|                   |        |
|-------------------|--------|
| fragment_344.2175 | : 0.30 |
| loss_156.0875     | : 0.25 |
| fragment_157.0975 | : 0.11 |
| fragment_345.2225 | : 0.06 |
| loss_179.0575     | : 0.03 |
| fragment_247.1625 | : 0.03 |
| fragment_134.0825 | : 0.01 |
| loss_78.0125      | : 0.01 |
| fragment_223.1075 | : 0.01 |

motif\_574

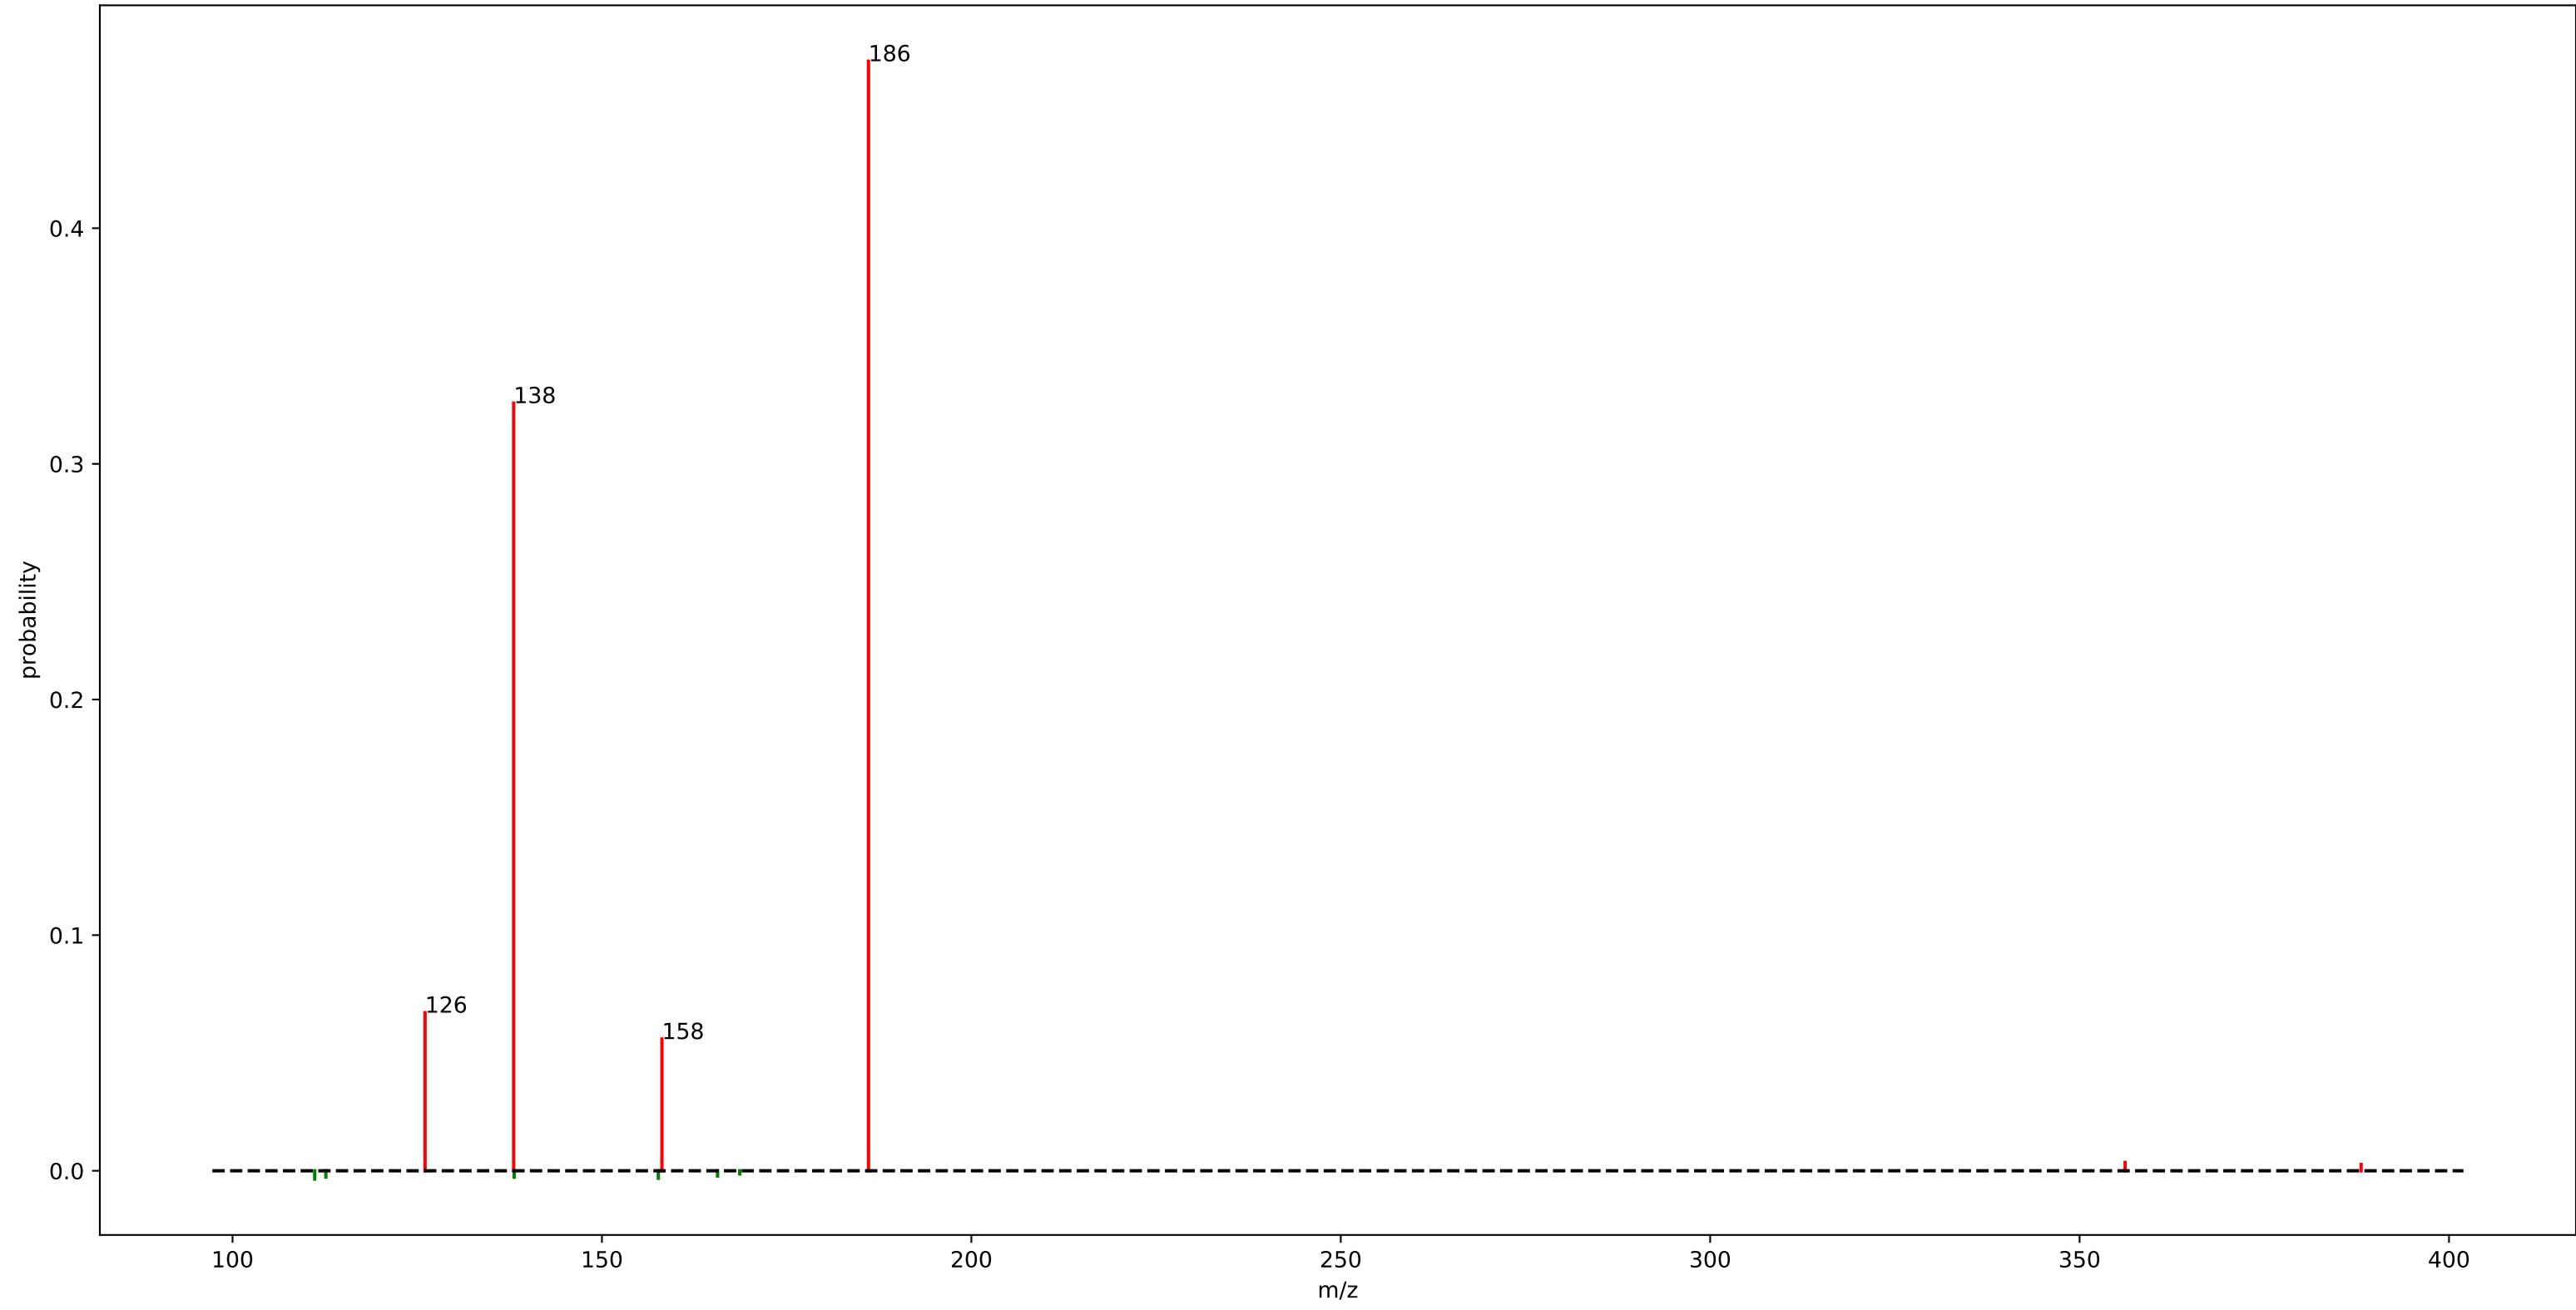

## motif\_574

|                   |        |
|-------------------|--------|
| fragment_186.0775 | : 0.47 |
| fragment_138.0525 | : 0.33 |
| fragment_126.0575 | : 0.07 |
| fragment_158.1175 | : 0.06 |

motif\_577

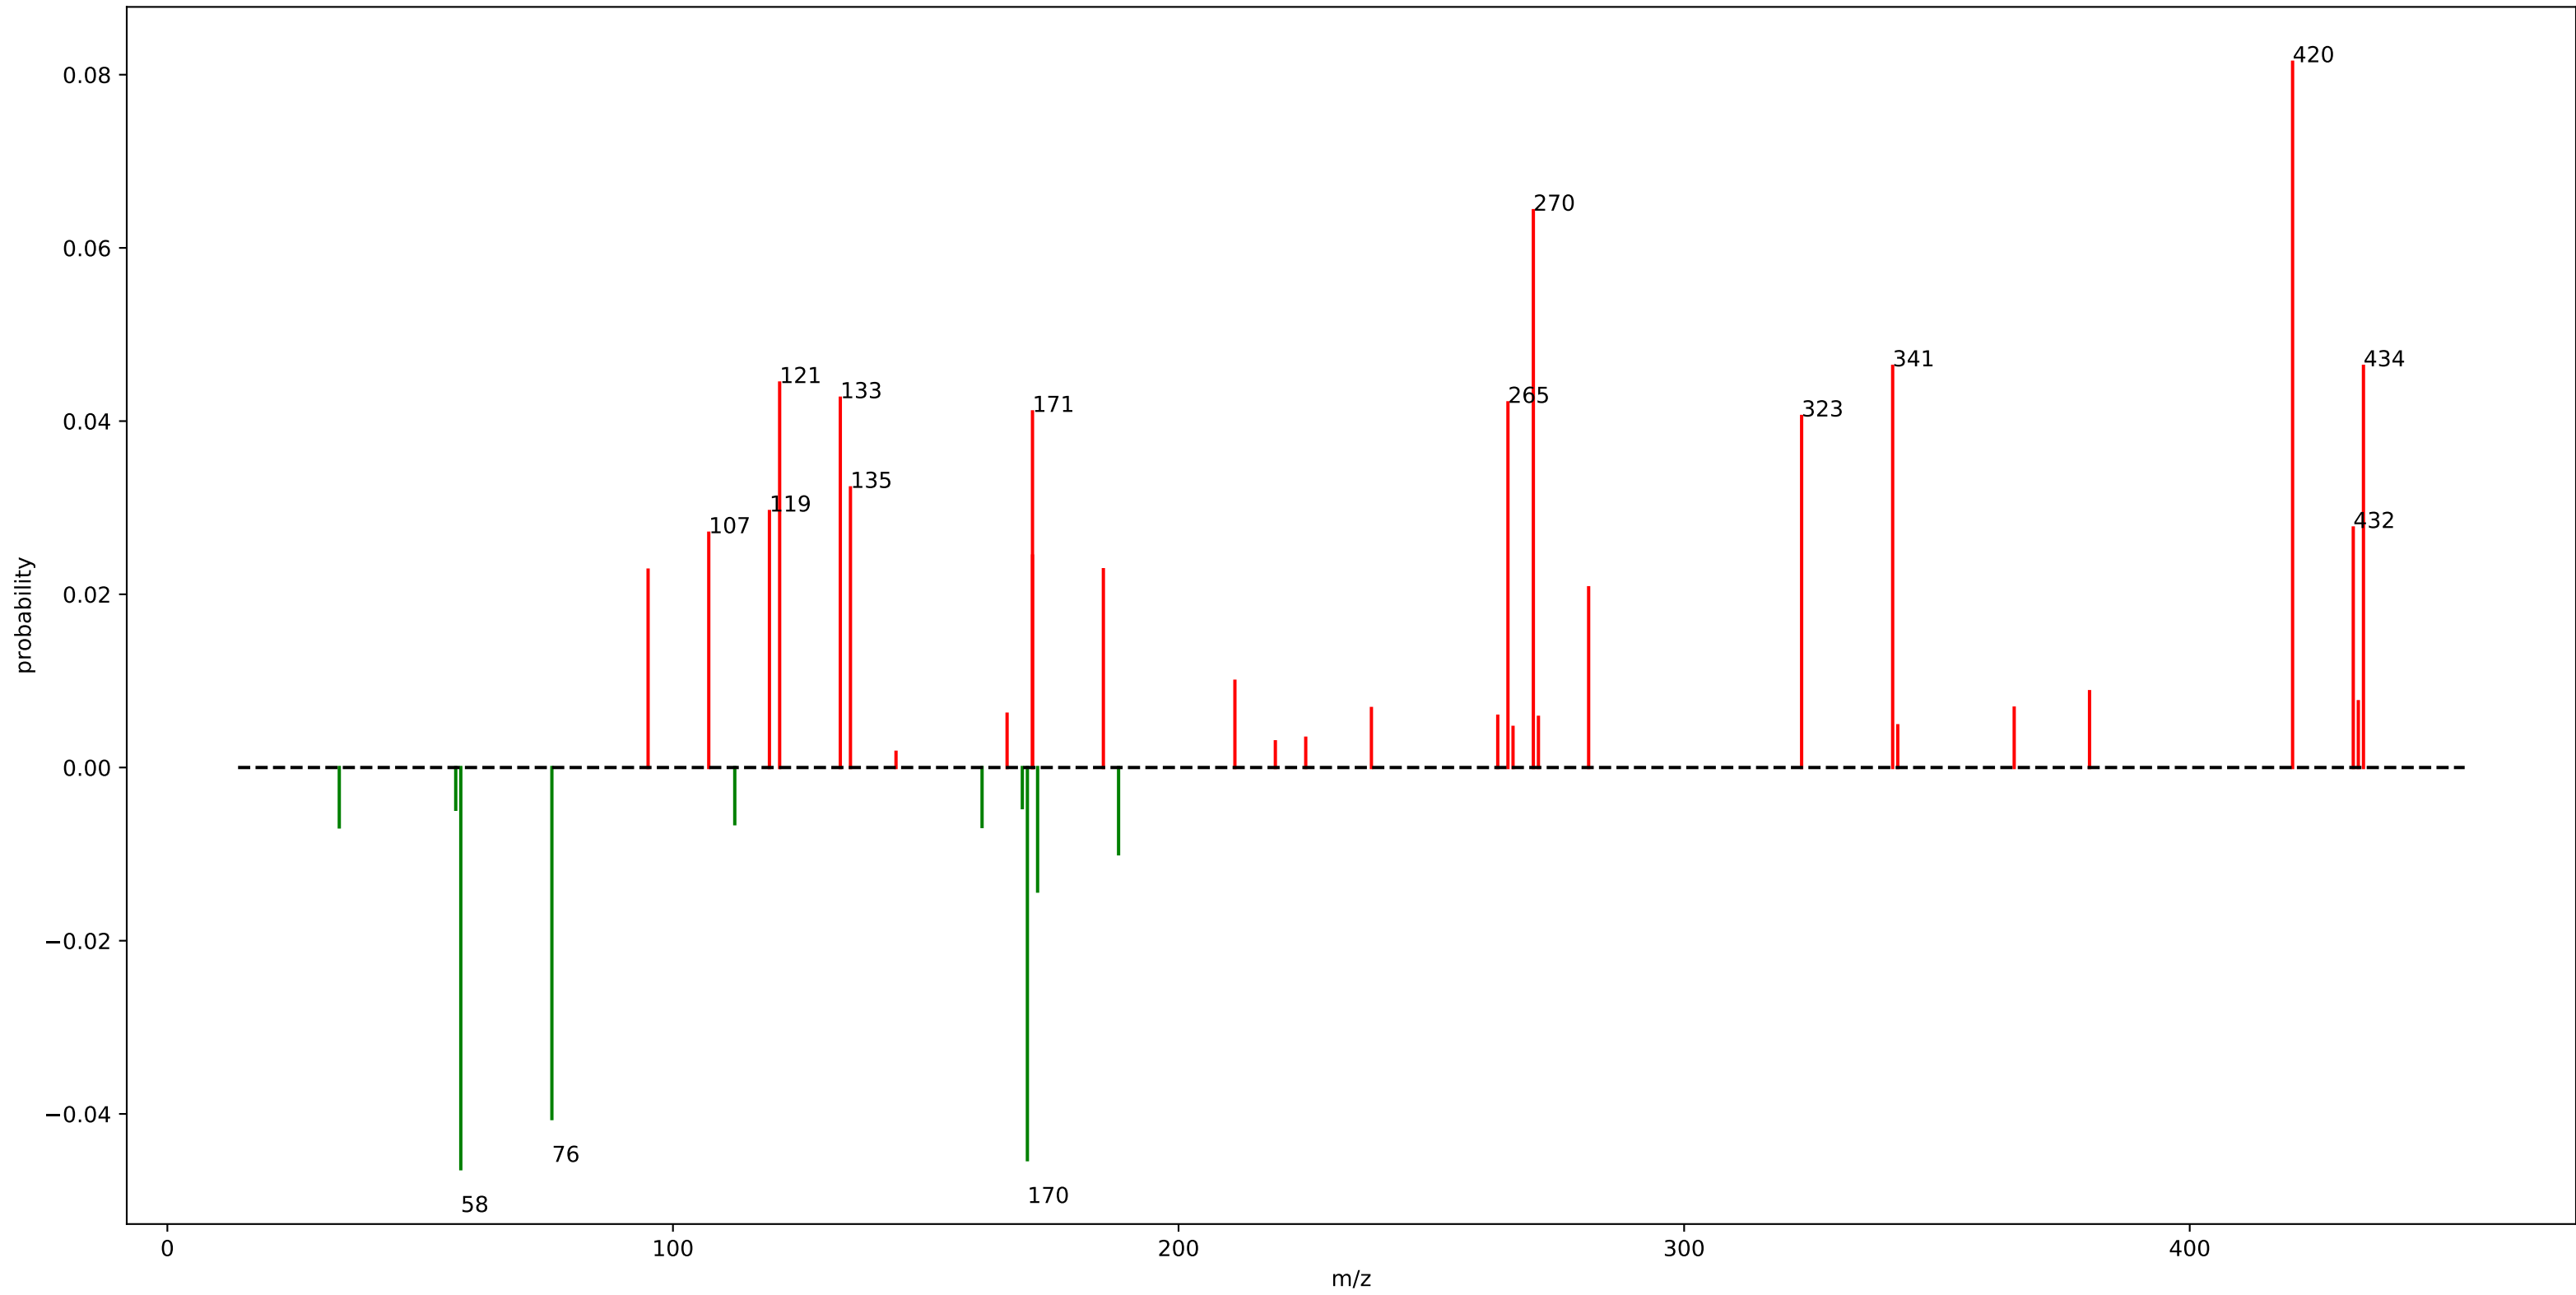

## motif\_577

|                   |        |                   |        |
|-------------------|--------|-------------------|--------|
| fragment_420.3475 | : 0.08 | loss_172.1225     | : 0.01 |
| fragment_270.1775 | : 0.06 | fragment_211.1475 | : 0.01 |
| fragment_341.2475 | : 0.05 | loss_188.1375     | : 0.01 |
| loss_58.0375      | : 0.05 | fragment_380.1825 | : 0.01 |
| fragment_434.3625 | : 0.05 | fragment_433.3475 | : 0.01 |
| loss_170.1025     | : 0.05 | loss_34.0025      | : 0.01 |
| fragment_121.1025 | : 0.04 | fragment_365.2825 | : 0.01 |
| fragment_133.1025 | : 0.04 | loss_161.1375     | : 0.01 |
| fragment_265.1525 | : 0.04 | fragment_238.1475 | : 0.01 |
| fragment_171.1125 | : 0.04 | loss_112.2275     | : 0.01 |
| fragment_323.2375 | : 0.04 | fragment_166.0875 | : 0.01 |
| loss_76.0525      | : 0.04 | fragment_263.1375 | : 0.01 |
| fragment_135.1075 | : 0.03 | fragment_271.1825 | : 0.01 |
| fragment_119.0825 | : 0.03 |                   |        |
| fragment_432.3475 | : 0.03 |                   |        |
| fragment_107.0825 | : 0.03 |                   |        |
| fragment_171.1175 | : 0.02 |                   |        |
| fragment_185.1325 | : 0.02 |                   |        |
| fragment_95.0825  | : 0.02 |                   |        |
| fragment_281.1125 | : 0.02 |                   |        |



motif\_402

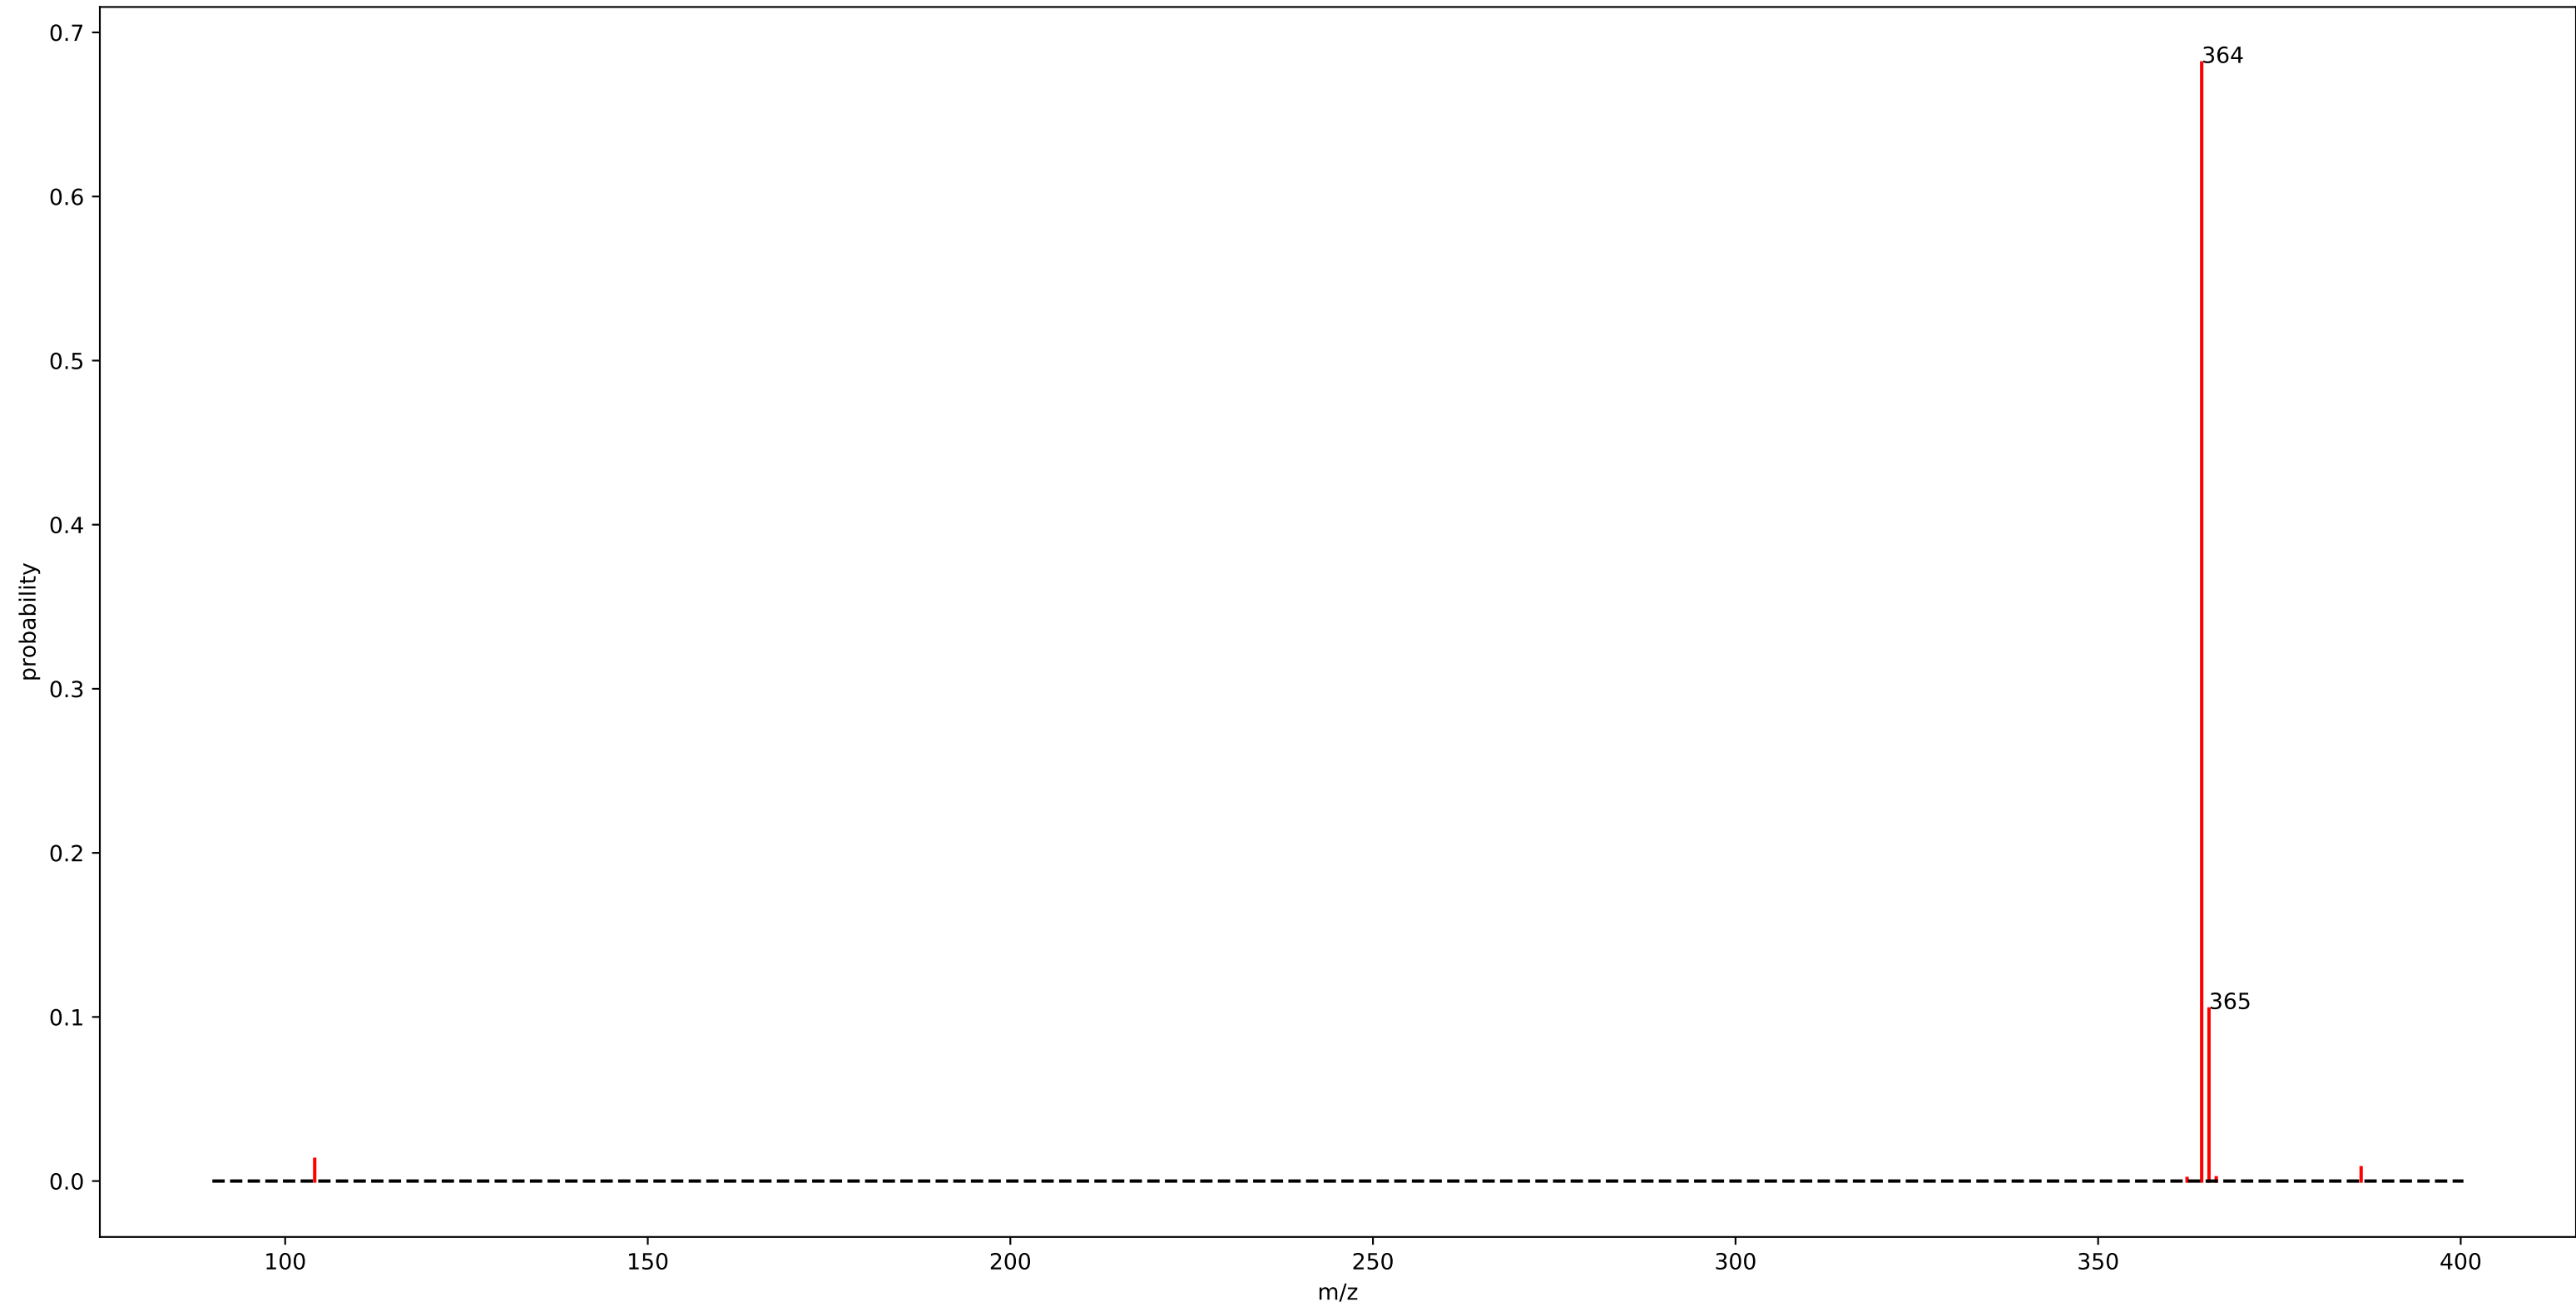

## motif\_402

|                   |        |
|-------------------|--------|
| fragment_364.2825 | : 0.68 |
| fragment_365.2875 | : 0.10 |
| fragment_104.0725 | : 0.01 |
| fragment_386.2675 | : 0.01 |

motif\_571

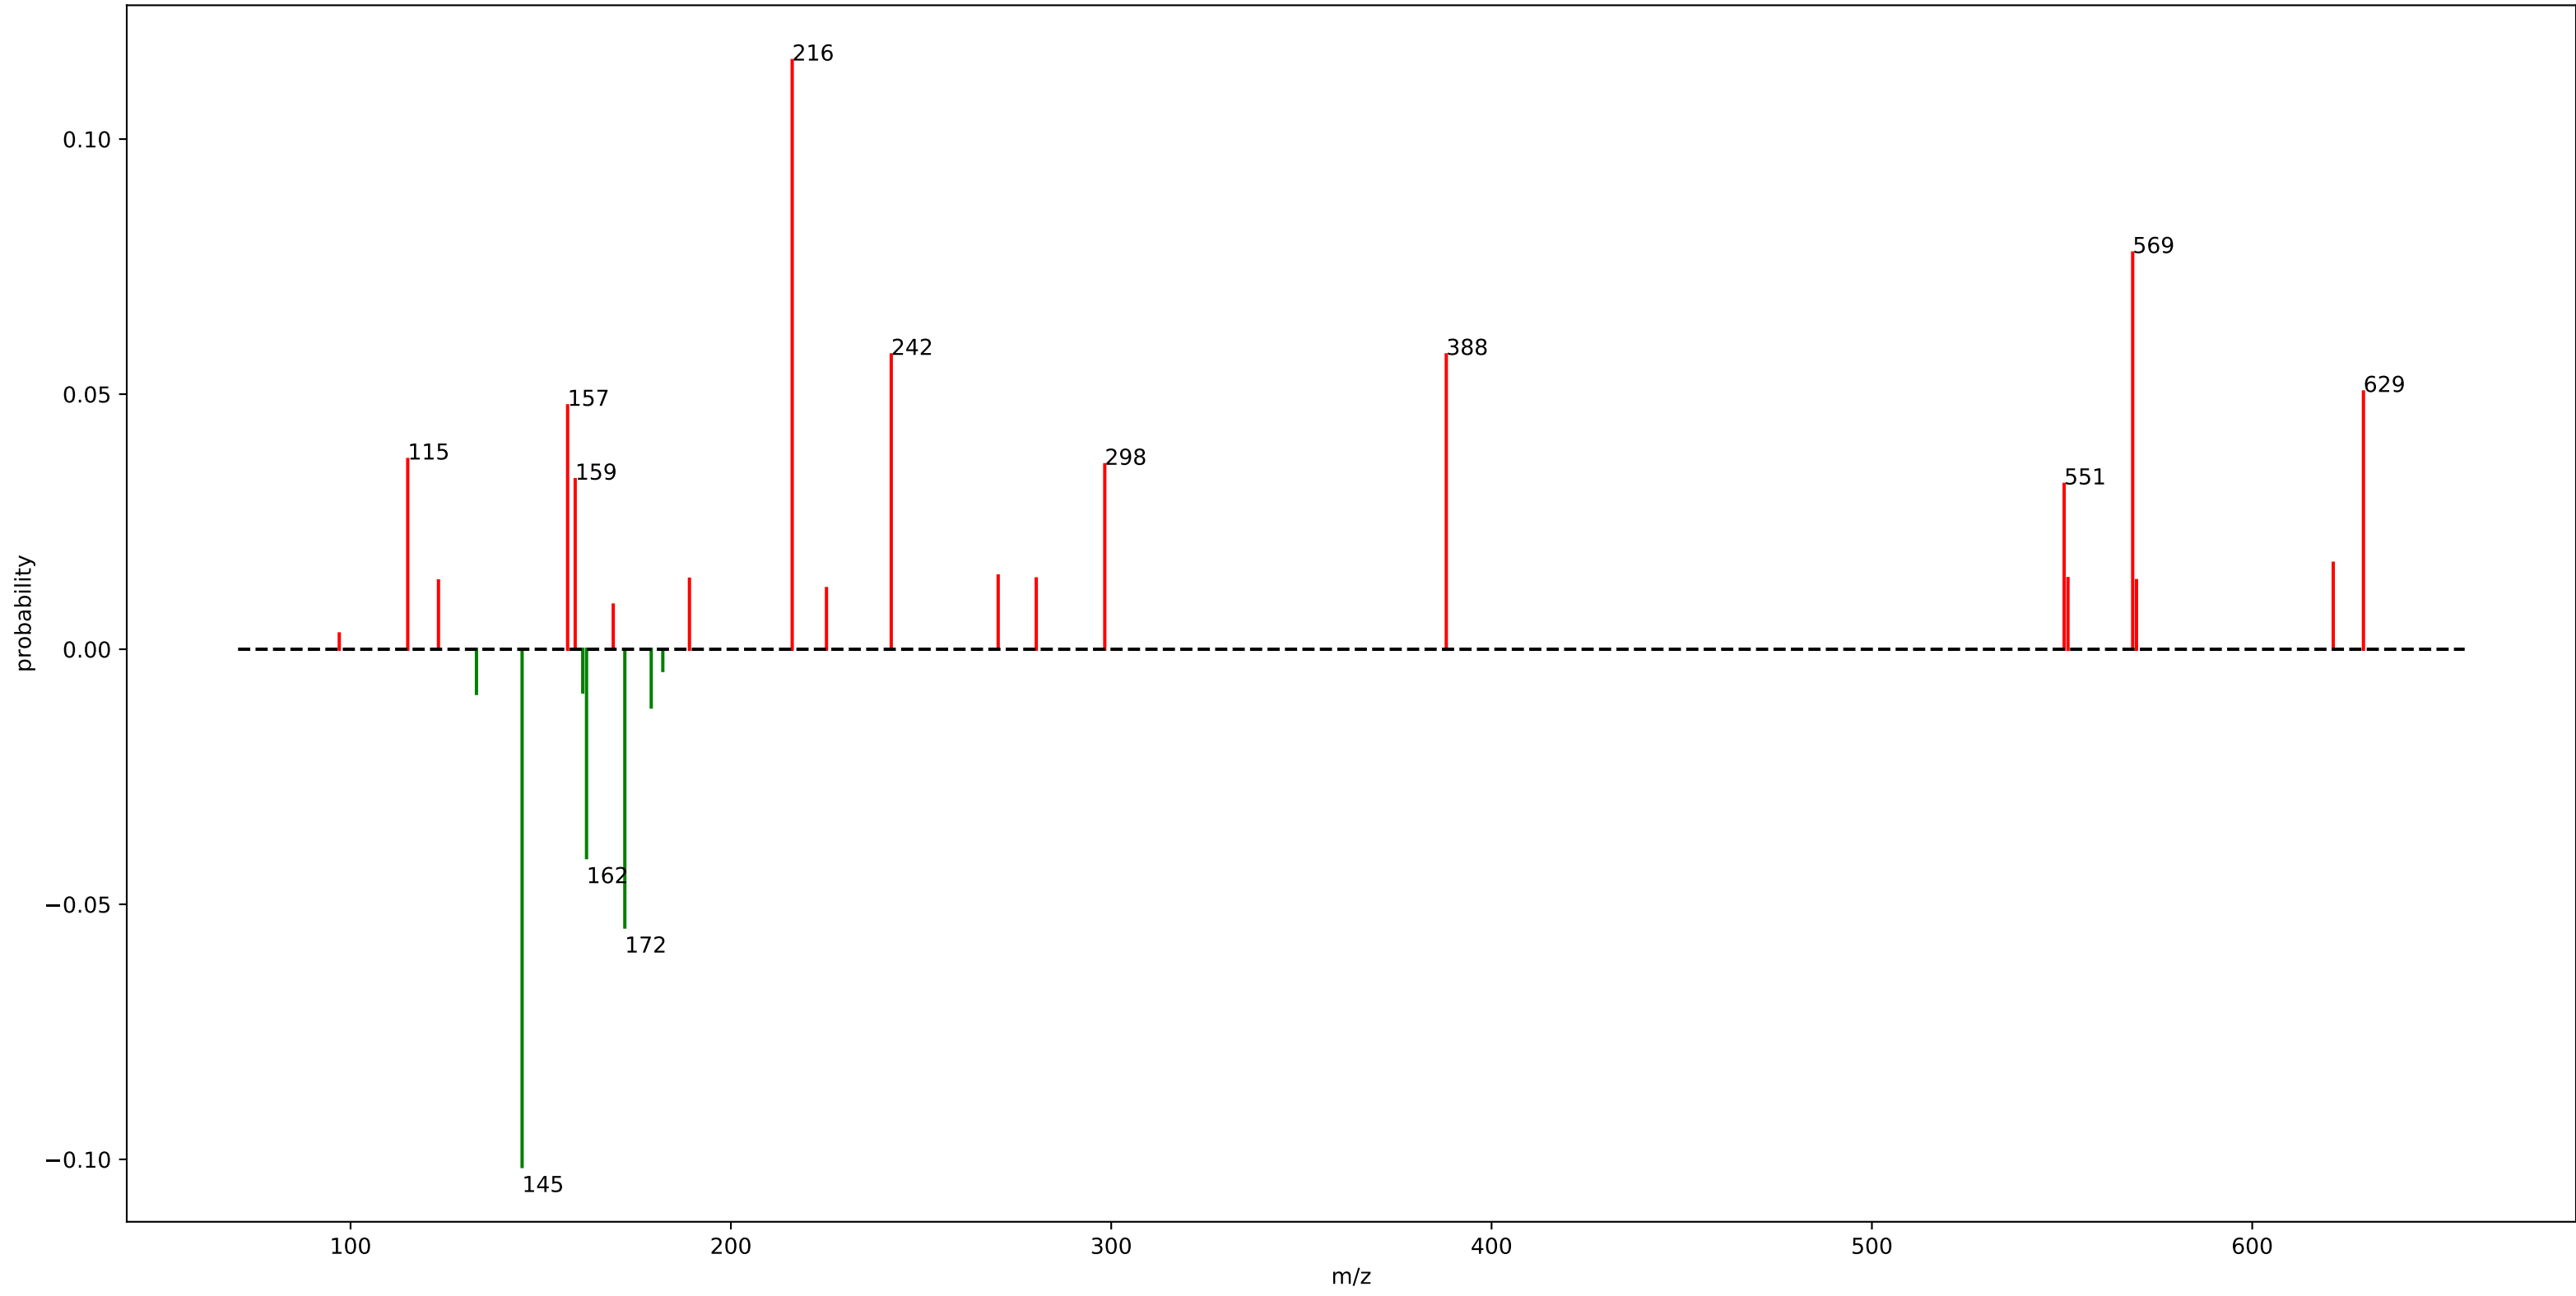

## motif\_571

|                   |        |                   |        |
|-------------------|--------|-------------------|--------|
| fragment_216.1225 | : 0.12 | fragment_225.1375 | : 0.01 |
| loss_145.1075     | : 0.10 | loss_179.0575     | : 0.01 |
| fragment_568.5675 | : 0.08 | loss_133.1075     | : 0.01 |
| fragment_388.0975 | : 0.06 | fragment_169.0725 | : 0.01 |
| fragment_242.1625 | : 0.06 | loss_161.0475     | : 0.01 |
| loss_172.1175     | : 0.05 |                   |        |
| fragment_629.2425 | : 0.05 |                   |        |
| fragment_157.0725 | : 0.05 |                   |        |
| loss_162.0475     | : 0.04 |                   |        |
| fragment_115.0375 | : 0.04 |                   |        |
| fragment_298.3075 | : 0.04 |                   |        |
| fragment_159.0625 | : 0.03 |                   |        |
| fragment_550.5525 | : 0.03 |                   |        |
| fragment_621.3025 | : 0.02 |                   |        |
| fragment_270.2775 | : 0.01 |                   |        |
| fragment_551.5575 | : 0.01 |                   |        |
| fragment_280.2975 | : 0.01 |                   |        |
| fragment_189.1025 | : 0.01 |                   |        |
| fragment_569.5675 | : 0.01 |                   |        |
| fragment_123.1175 | : 0.01 |                   |        |

motif\_570

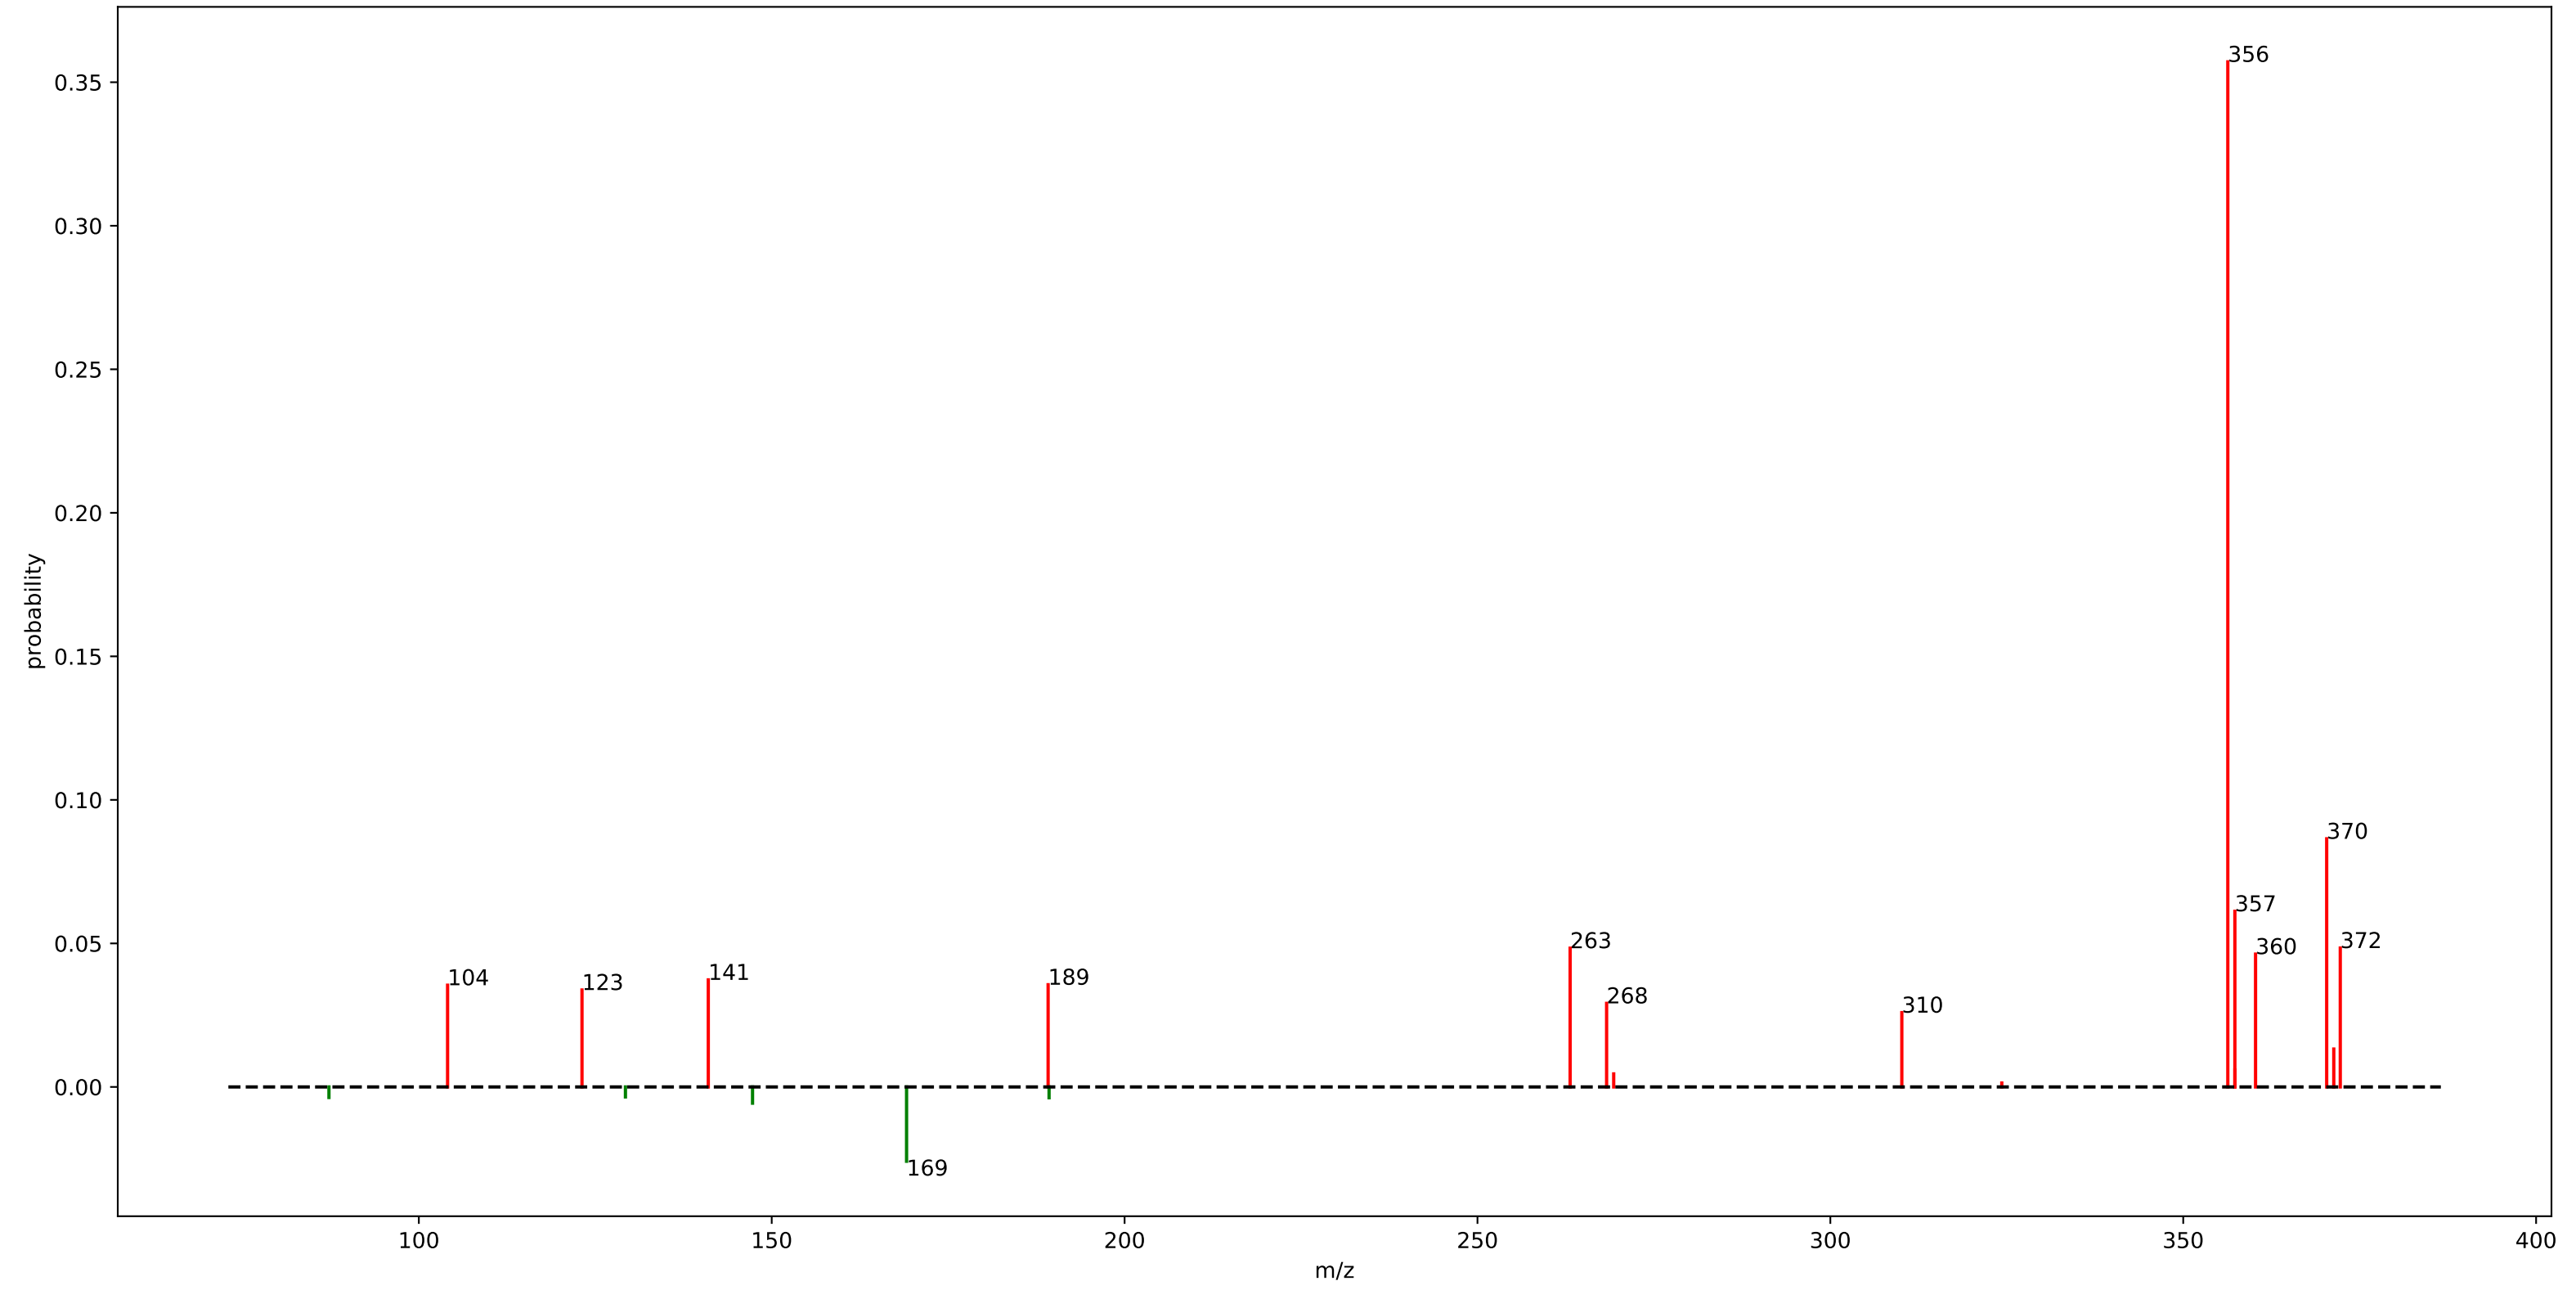

## motif\_570

|                   |        |
|-------------------|--------|
| fragment_356.3175 | : 0.36 |
| fragment_370.3275 | : 0.09 |
| fragment_357.3175 | : 0.06 |
| fragment_372.2525 | : 0.05 |
| fragment_263.1275 | : 0.05 |
| fragment_360.2475 | : 0.05 |
| fragment_141.0125 | : 0.04 |
| fragment_189.1625 | : 0.04 |
| fragment_104.0725 | : 0.04 |
| fragment_123.1175 | : 0.03 |
| fragment_268.2975 | : 0.03 |
| loss_169.1075     | : 0.03 |
| fragment_310.1275 | : 0.03 |
| fragment_371.3325 | : 0.01 |
| fragment_357.3225 | : 0.01 |
| loss_147.2825     | : 0.01 |

motif\_573

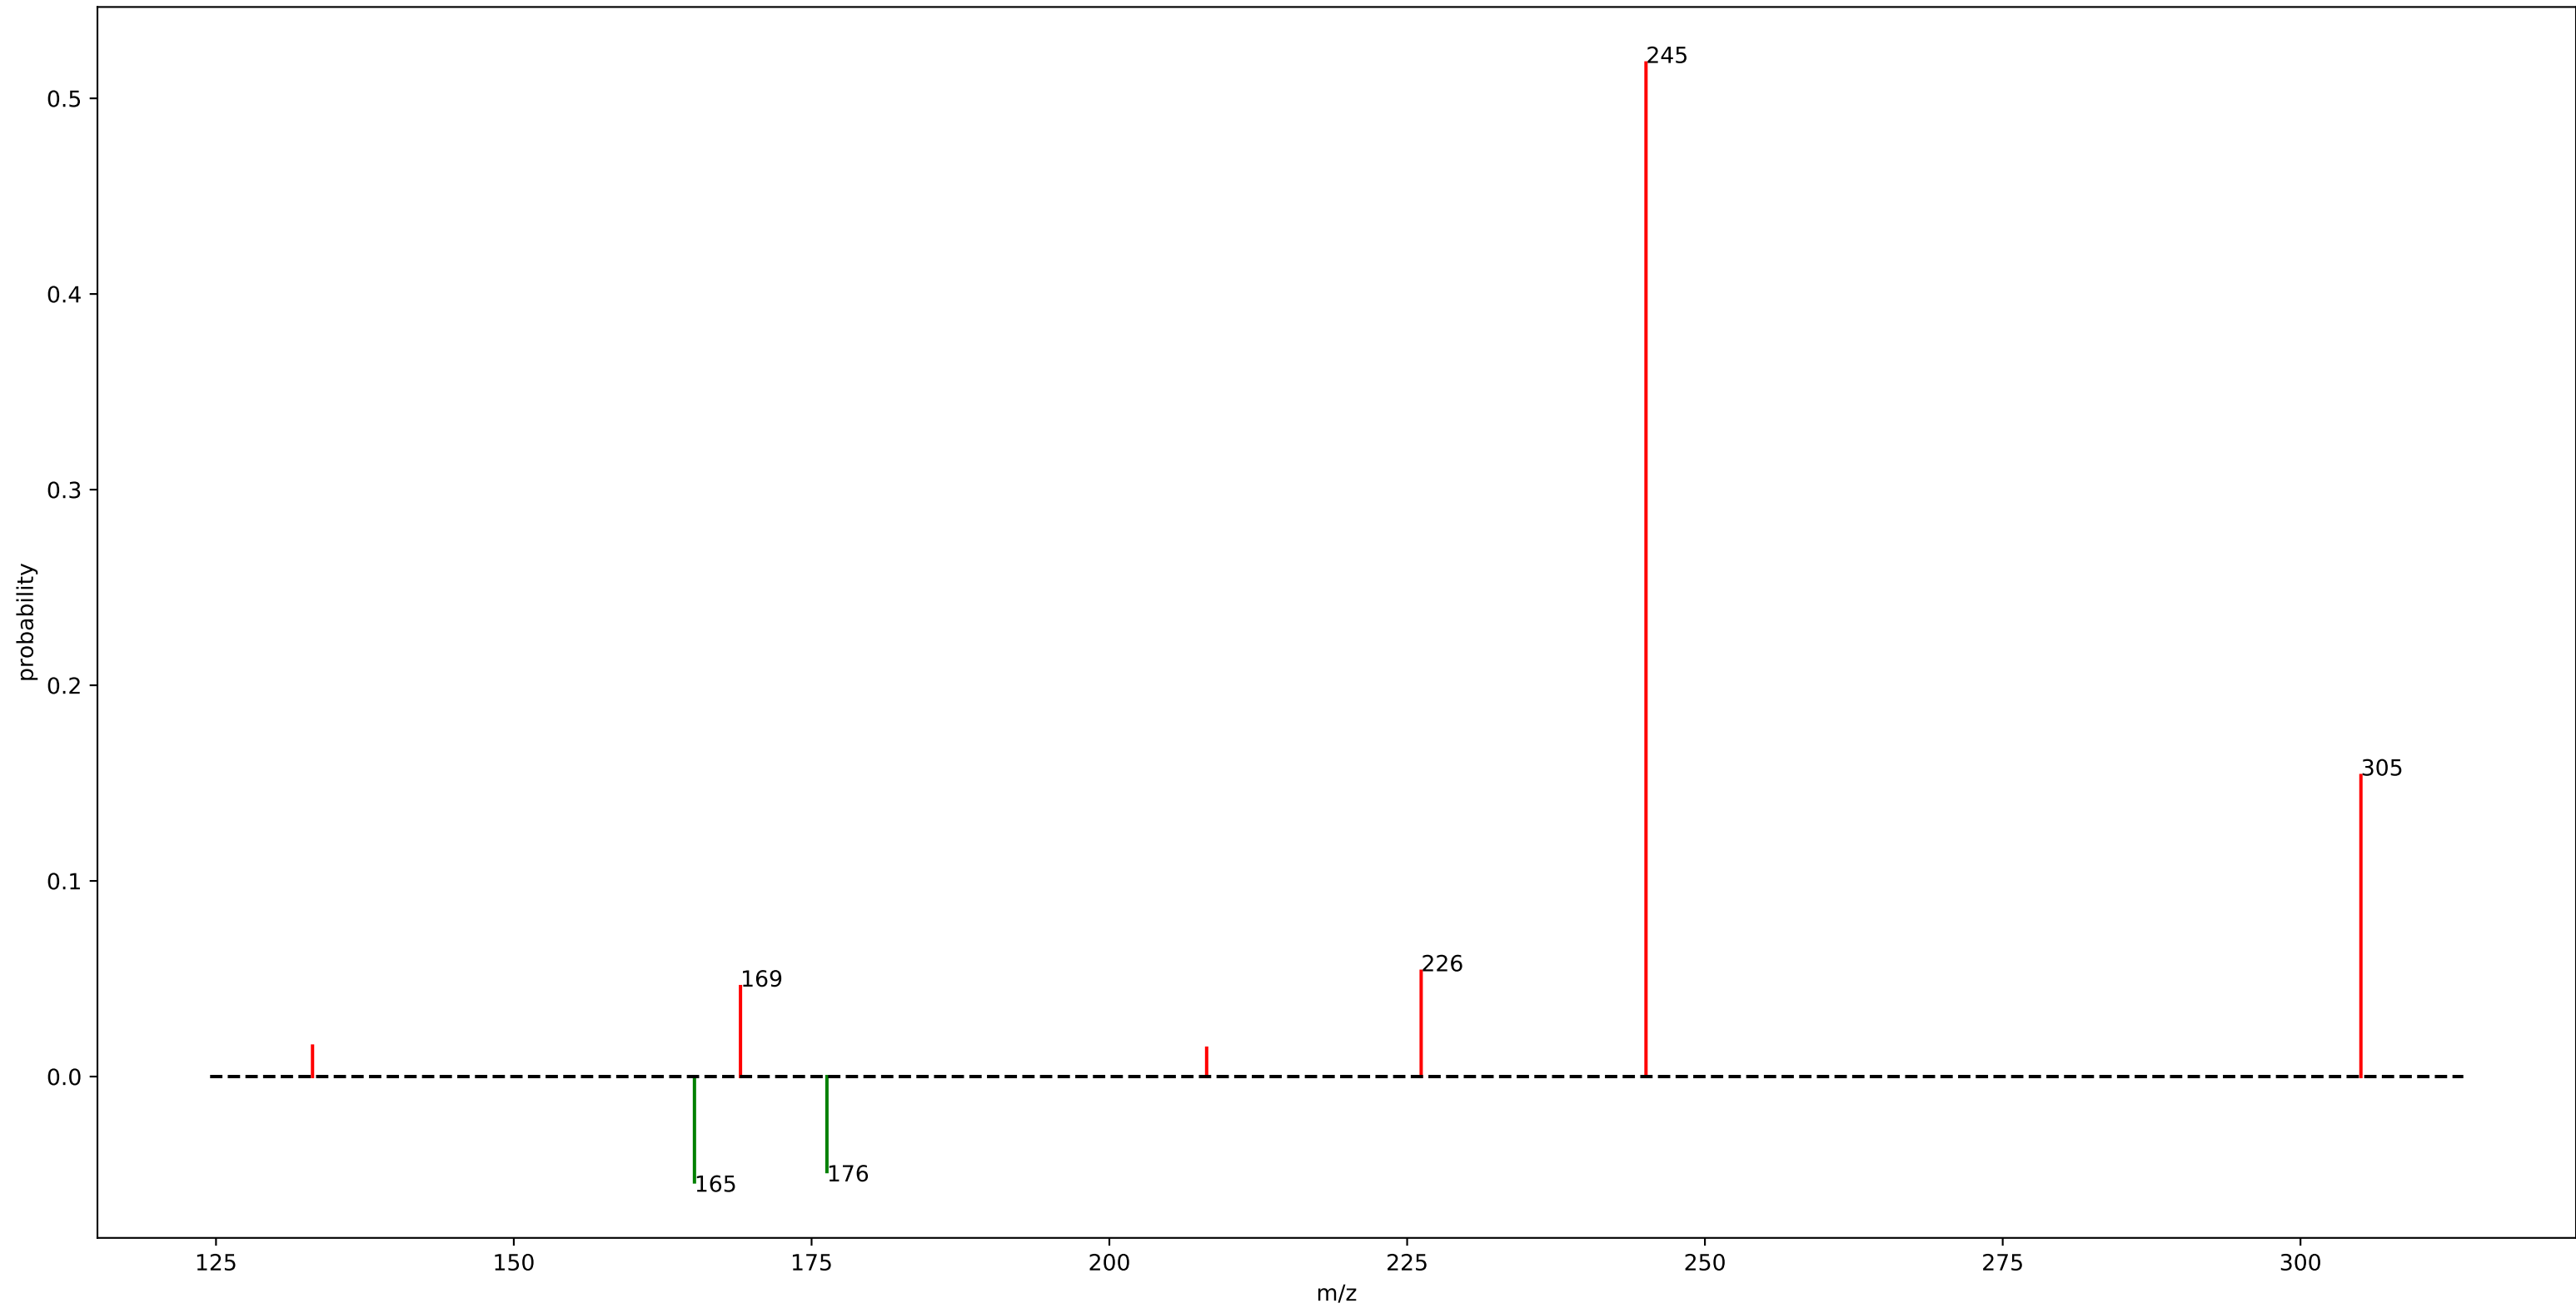

## motif\_573

|                   |        |
|-------------------|--------|
| fragment_245.0525 | : 0.52 |
| fragment_305.0725 | : 0.15 |
| loss_165.1675     | : 0.05 |
| fragment_226.1775 | : 0.05 |
| loss_176.2875     | : 0.05 |
| fragment_169.0325 | : 0.05 |
| fragment_133.1025 | : 0.02 |
| fragment_208.1675 | : 0.01 |



motif\_572

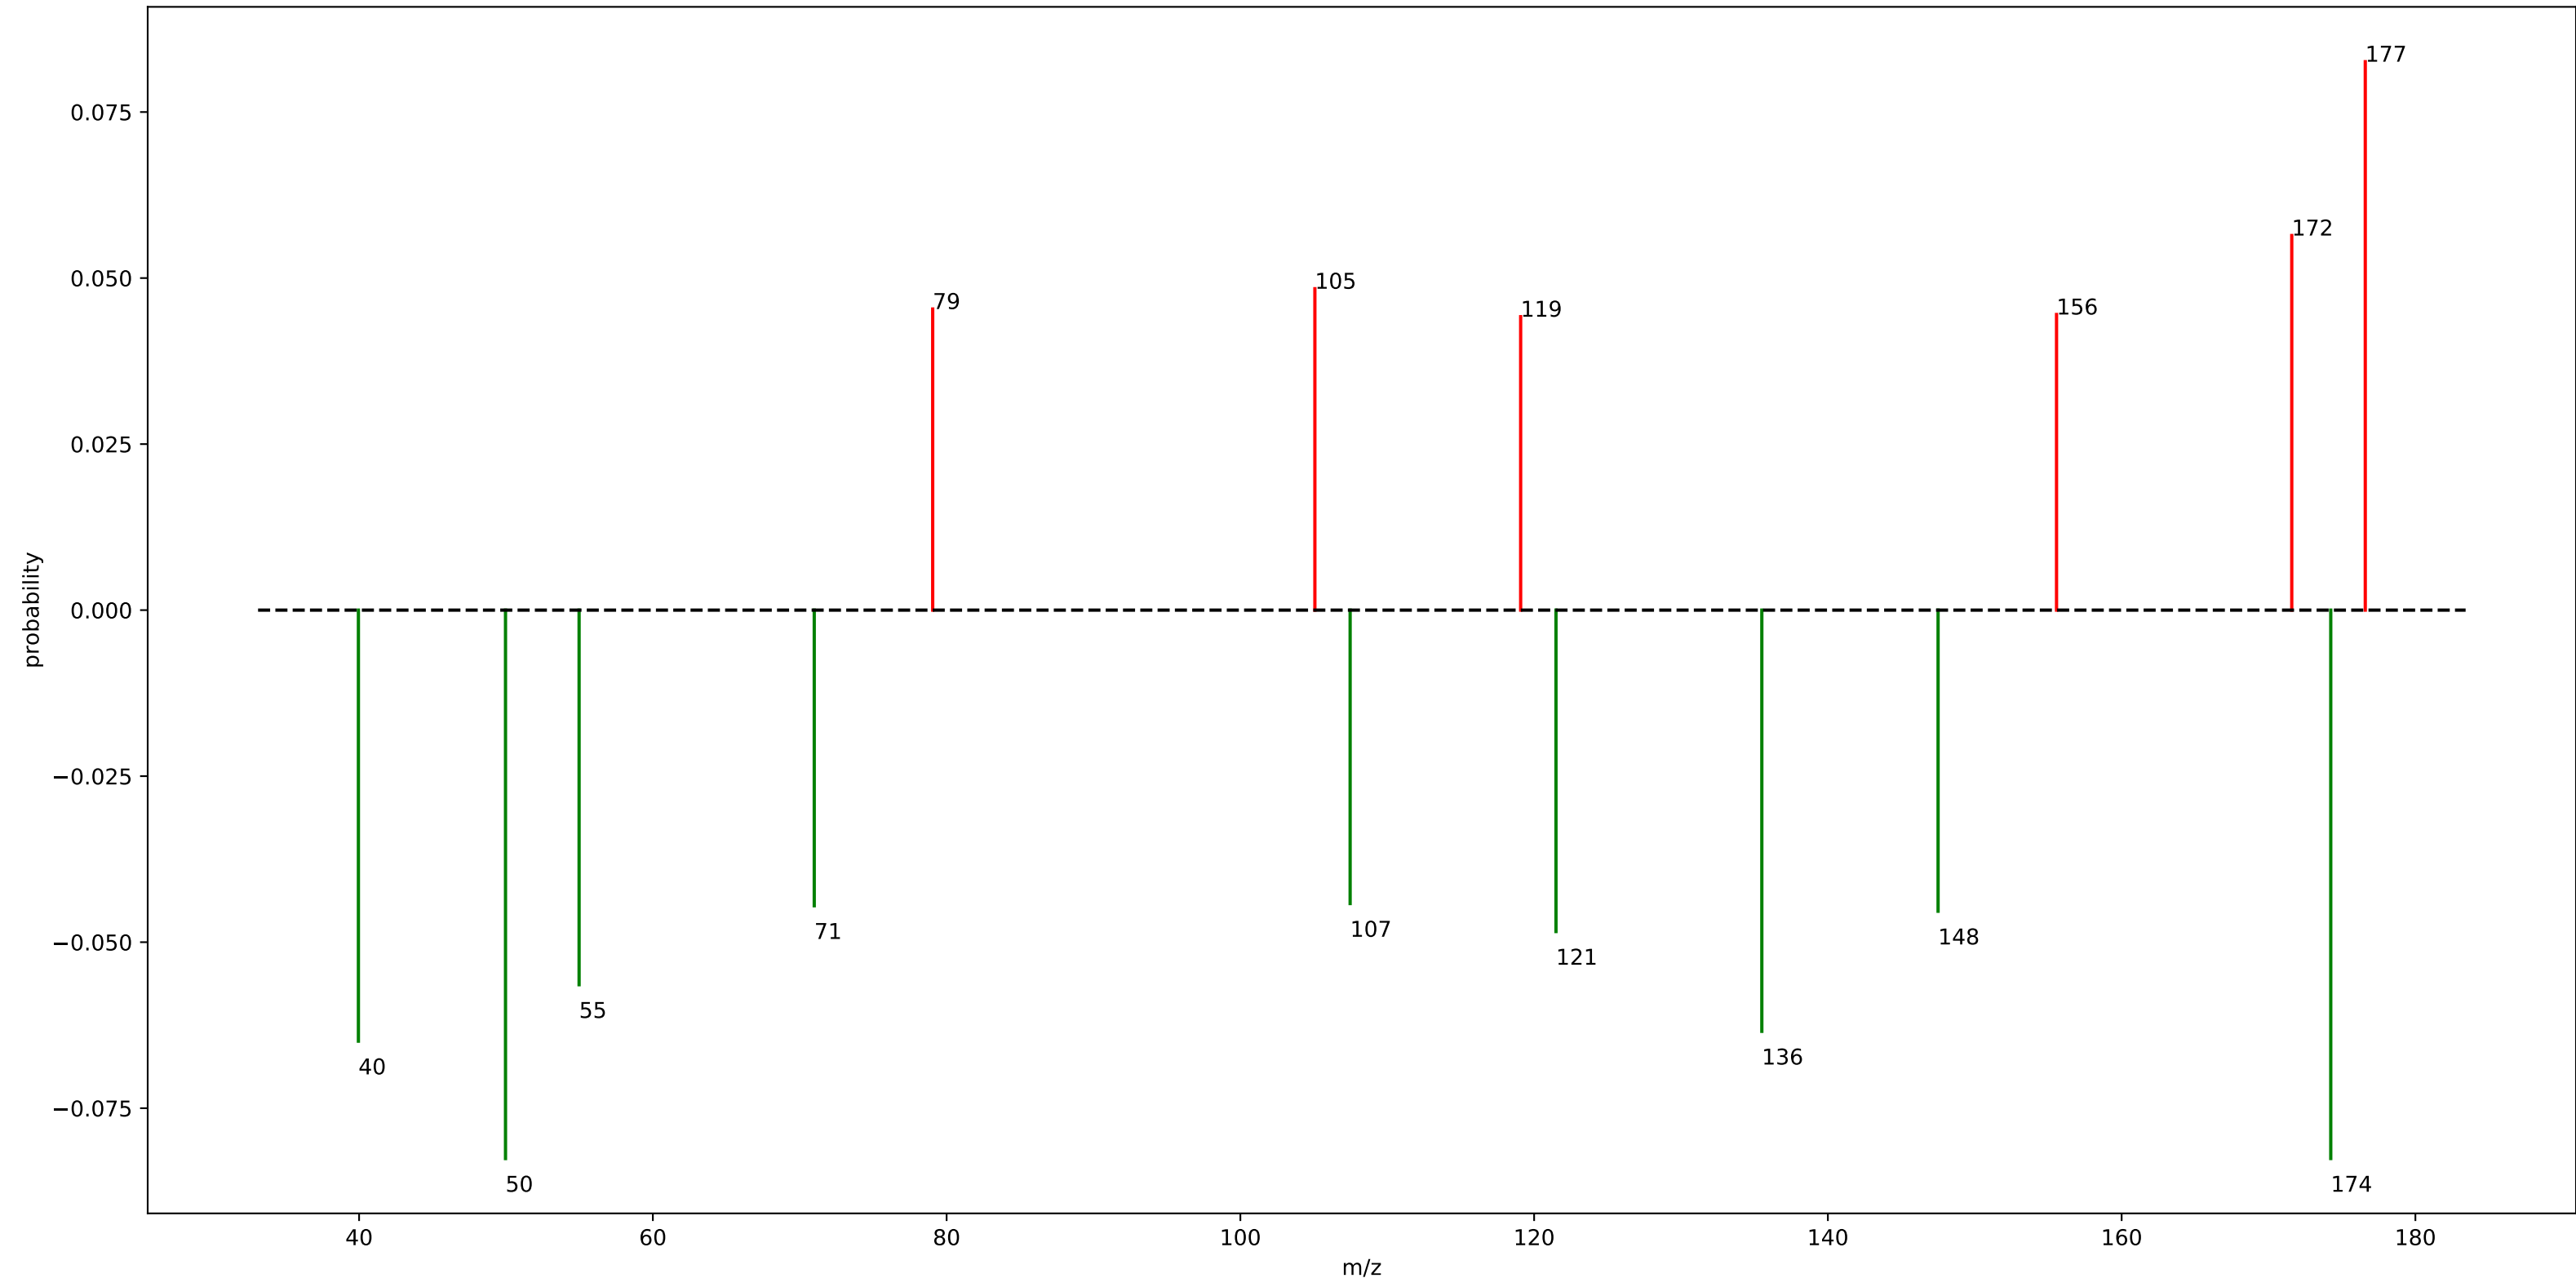

## motif\_572

|                   |        |
|-------------------|--------|
| loss_49.9675      | : 0.08 |
| fragment_176.5875 | : 0.08 |
| loss_174.2375     | : 0.08 |
| loss_39.9525      | : 0.06 |
| loss_135.5025     | : 0.06 |
| fragment_171.5825 | : 0.06 |
| loss_54.9775      | : 0.06 |
| fragment_105.0725 | : 0.05 |
| loss_121.4875     | : 0.05 |
| loss_147.5025     | : 0.05 |
| fragment_79.0525  | : 0.05 |
| loss_70.9875      | : 0.04 |
| fragment_155.5675 | : 0.04 |
| fragment_119.0825 | : 0.04 |
| loss_107.4725     | : 0.04 |

motif\_672

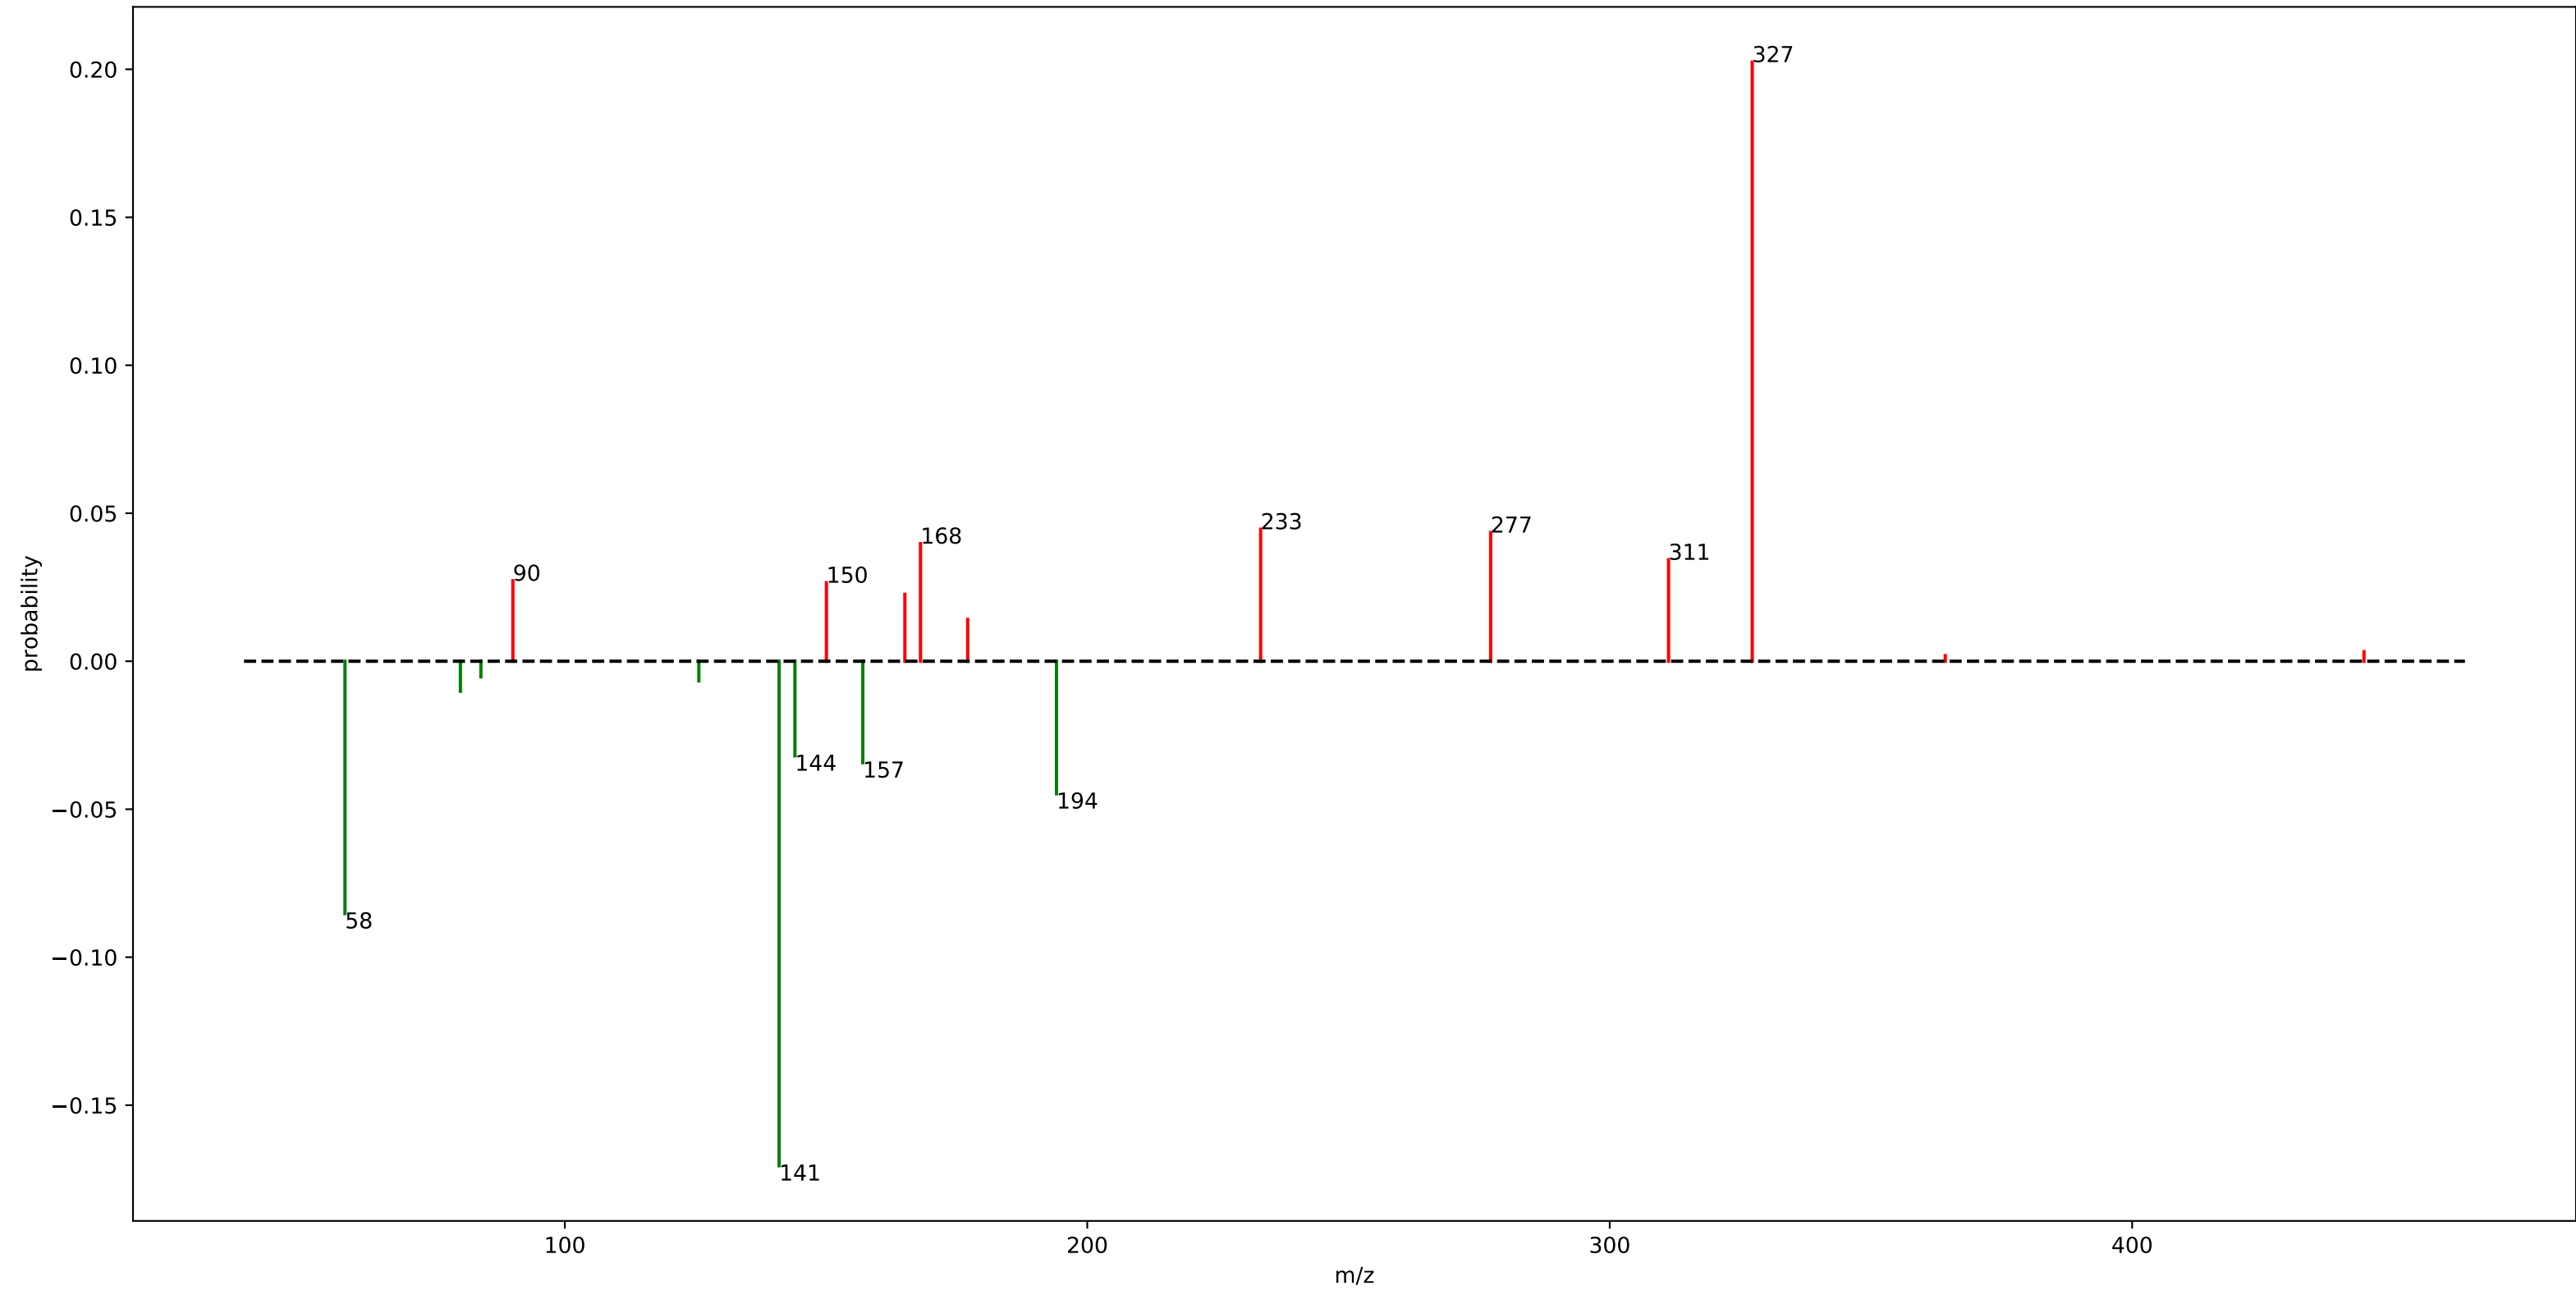

## motif\_672

|                   |        |
|-------------------|--------|
| fragment_327.2875 | : 0.20 |
| loss_141.0175     | : 0.17 |
| loss_57.9175      | : 0.09 |
| loss_194.1125     | : 0.04 |
| fragment_233.1875 | : 0.04 |
| fragment_277.2125 | : 0.04 |
| fragment_168.0775 | : 0.04 |
| loss_157.0375     | : 0.03 |
| fragment_311.2675 | : 0.03 |
| loss_144.0425     | : 0.03 |
| fragment_90.0575  | : 0.03 |
| fragment_150.0675 | : 0.03 |
| fragment_165.0875 | : 0.02 |
| fragment_177.1125 | : 0.01 |
| loss_80.0125      | : 0.01 |
| loss_125.6525     | : 0.01 |
| loss_83.9375      | : 0.01 |

motif\_673

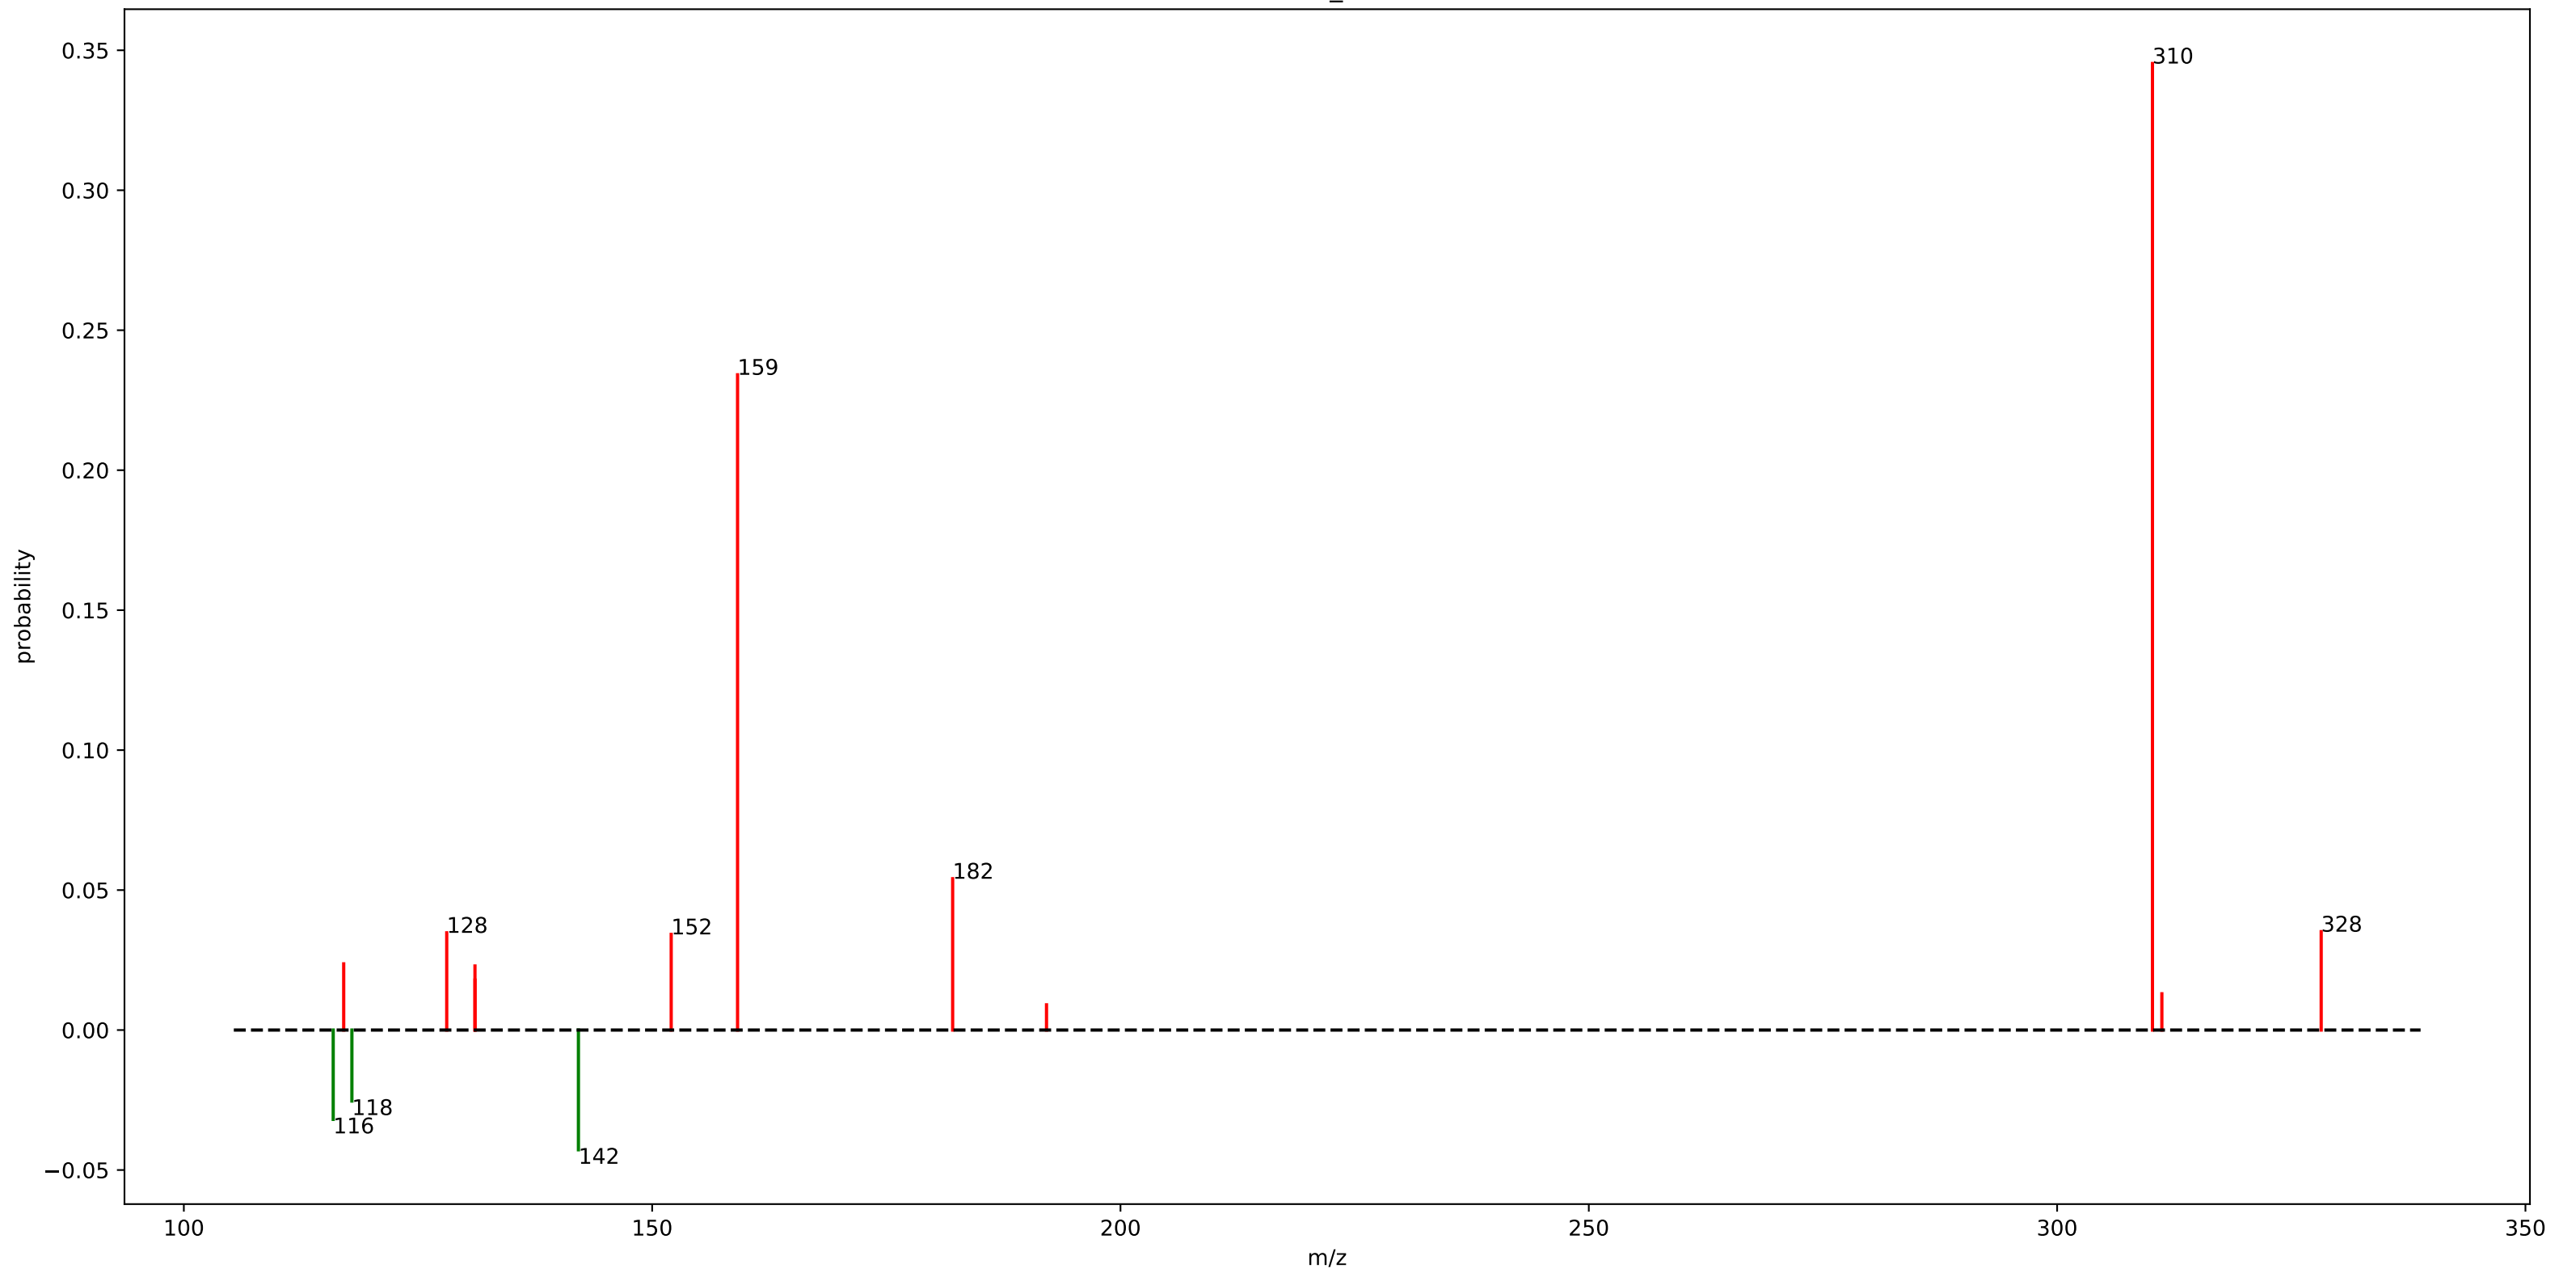

## motif\_673

|                   |        |
|-------------------|--------|
| fragment_310.1775 | : 0.35 |
| fragment_159.1175 | : 0.23 |
| fragment_182.0825 | : 0.05 |
| loss_142.1275     | : 0.04 |
| fragment_328.1925 | : 0.04 |
| fragment_128.0675 | : 0.03 |
| fragment_152.0325 | : 0.03 |
| loss_115.9475     | : 0.03 |
| loss_117.9425     | : 0.03 |
| fragment_117.0675 | : 0.02 |
| fragment_131.0825 | : 0.02 |
| fragment_131.0875 | : 0.02 |
| fragment_311.1825 | : 0.01 |
| fragment_192.1025 | : 0.01 |

motif\_670

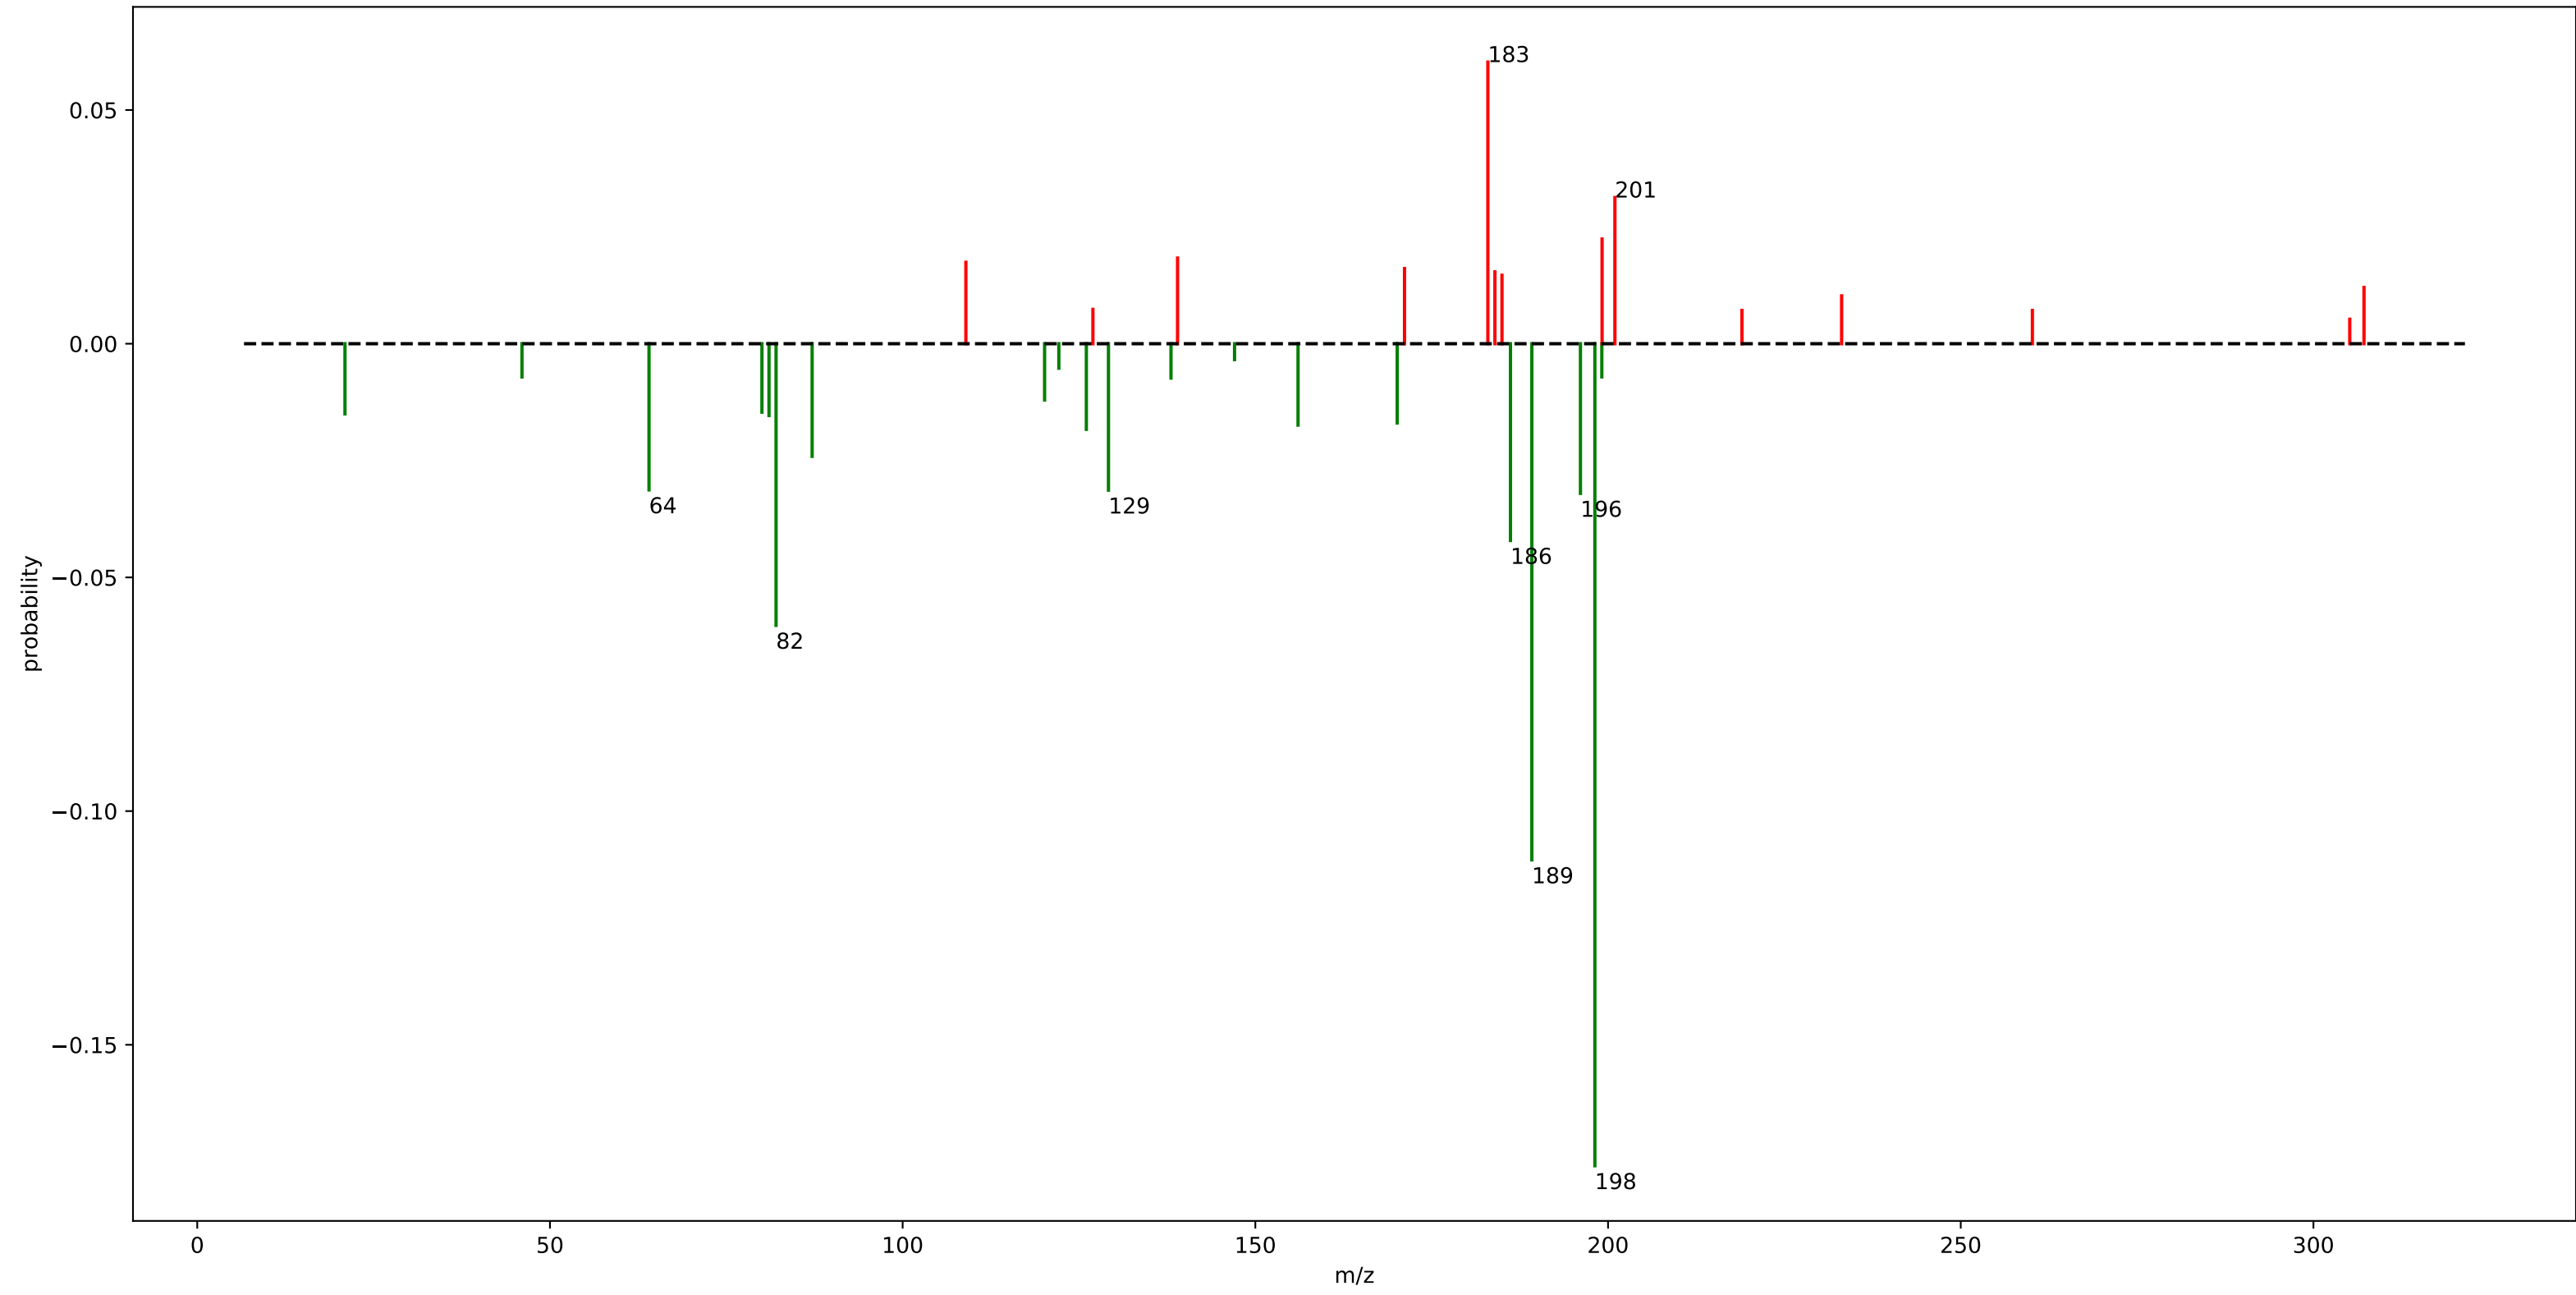

## motif\_670

|                   |        |                   |        |
|-------------------|--------|-------------------|--------|
| loss_198.1325     | : 0.18 | loss_80.0525      | : 0.01 |
| loss_189.1975     | : 0.11 | fragment_184.9625 | : 0.01 |
| loss_82.0525      | : 0.06 | loss_120.1225     | : 0.01 |
| fragment_182.9625 | : 0.06 | fragment_307.1675 | : 0.01 |
| loss_186.1675     | : 0.04 | fragment_233.1125 | : 0.01 |
| loss_196.0875     | : 0.03 | fragment_126.9725 | : 0.01 |
| loss_129.1775     | : 0.03 | loss_138.0425     | : 0.01 |
| fragment_200.9725 | : 0.03 | loss_46.0325      | : 0.01 |
| loss_64.0425      | : 0.03 | fragment_218.9825 | : 0.01 |
| loss_87.1675      | : 0.02 | loss_199.1175     | : 0.01 |
| fragment_199.1525 | : 0.02 | fragment_260.1575 | : 0.01 |
| loss_126.0425     | : 0.02 | fragment_305.1475 | : 0.01 |
| fragment_138.9725 | : 0.02 | loss_122.1425     | : 0.01 |
| fragment_108.9625 | : 0.02 |                   |        |
| loss_156.0525     | : 0.02 |                   |        |
| loss_170.1075     | : 0.02 |                   |        |
| fragment_171.1475 | : 0.02 |                   |        |
| fragment_183.9625 | : 0.02 |                   |        |
| loss_81.0525      | : 0.02 |                   |        |
| loss_20.9425      | : 0.02 |                   |        |



motif\_671

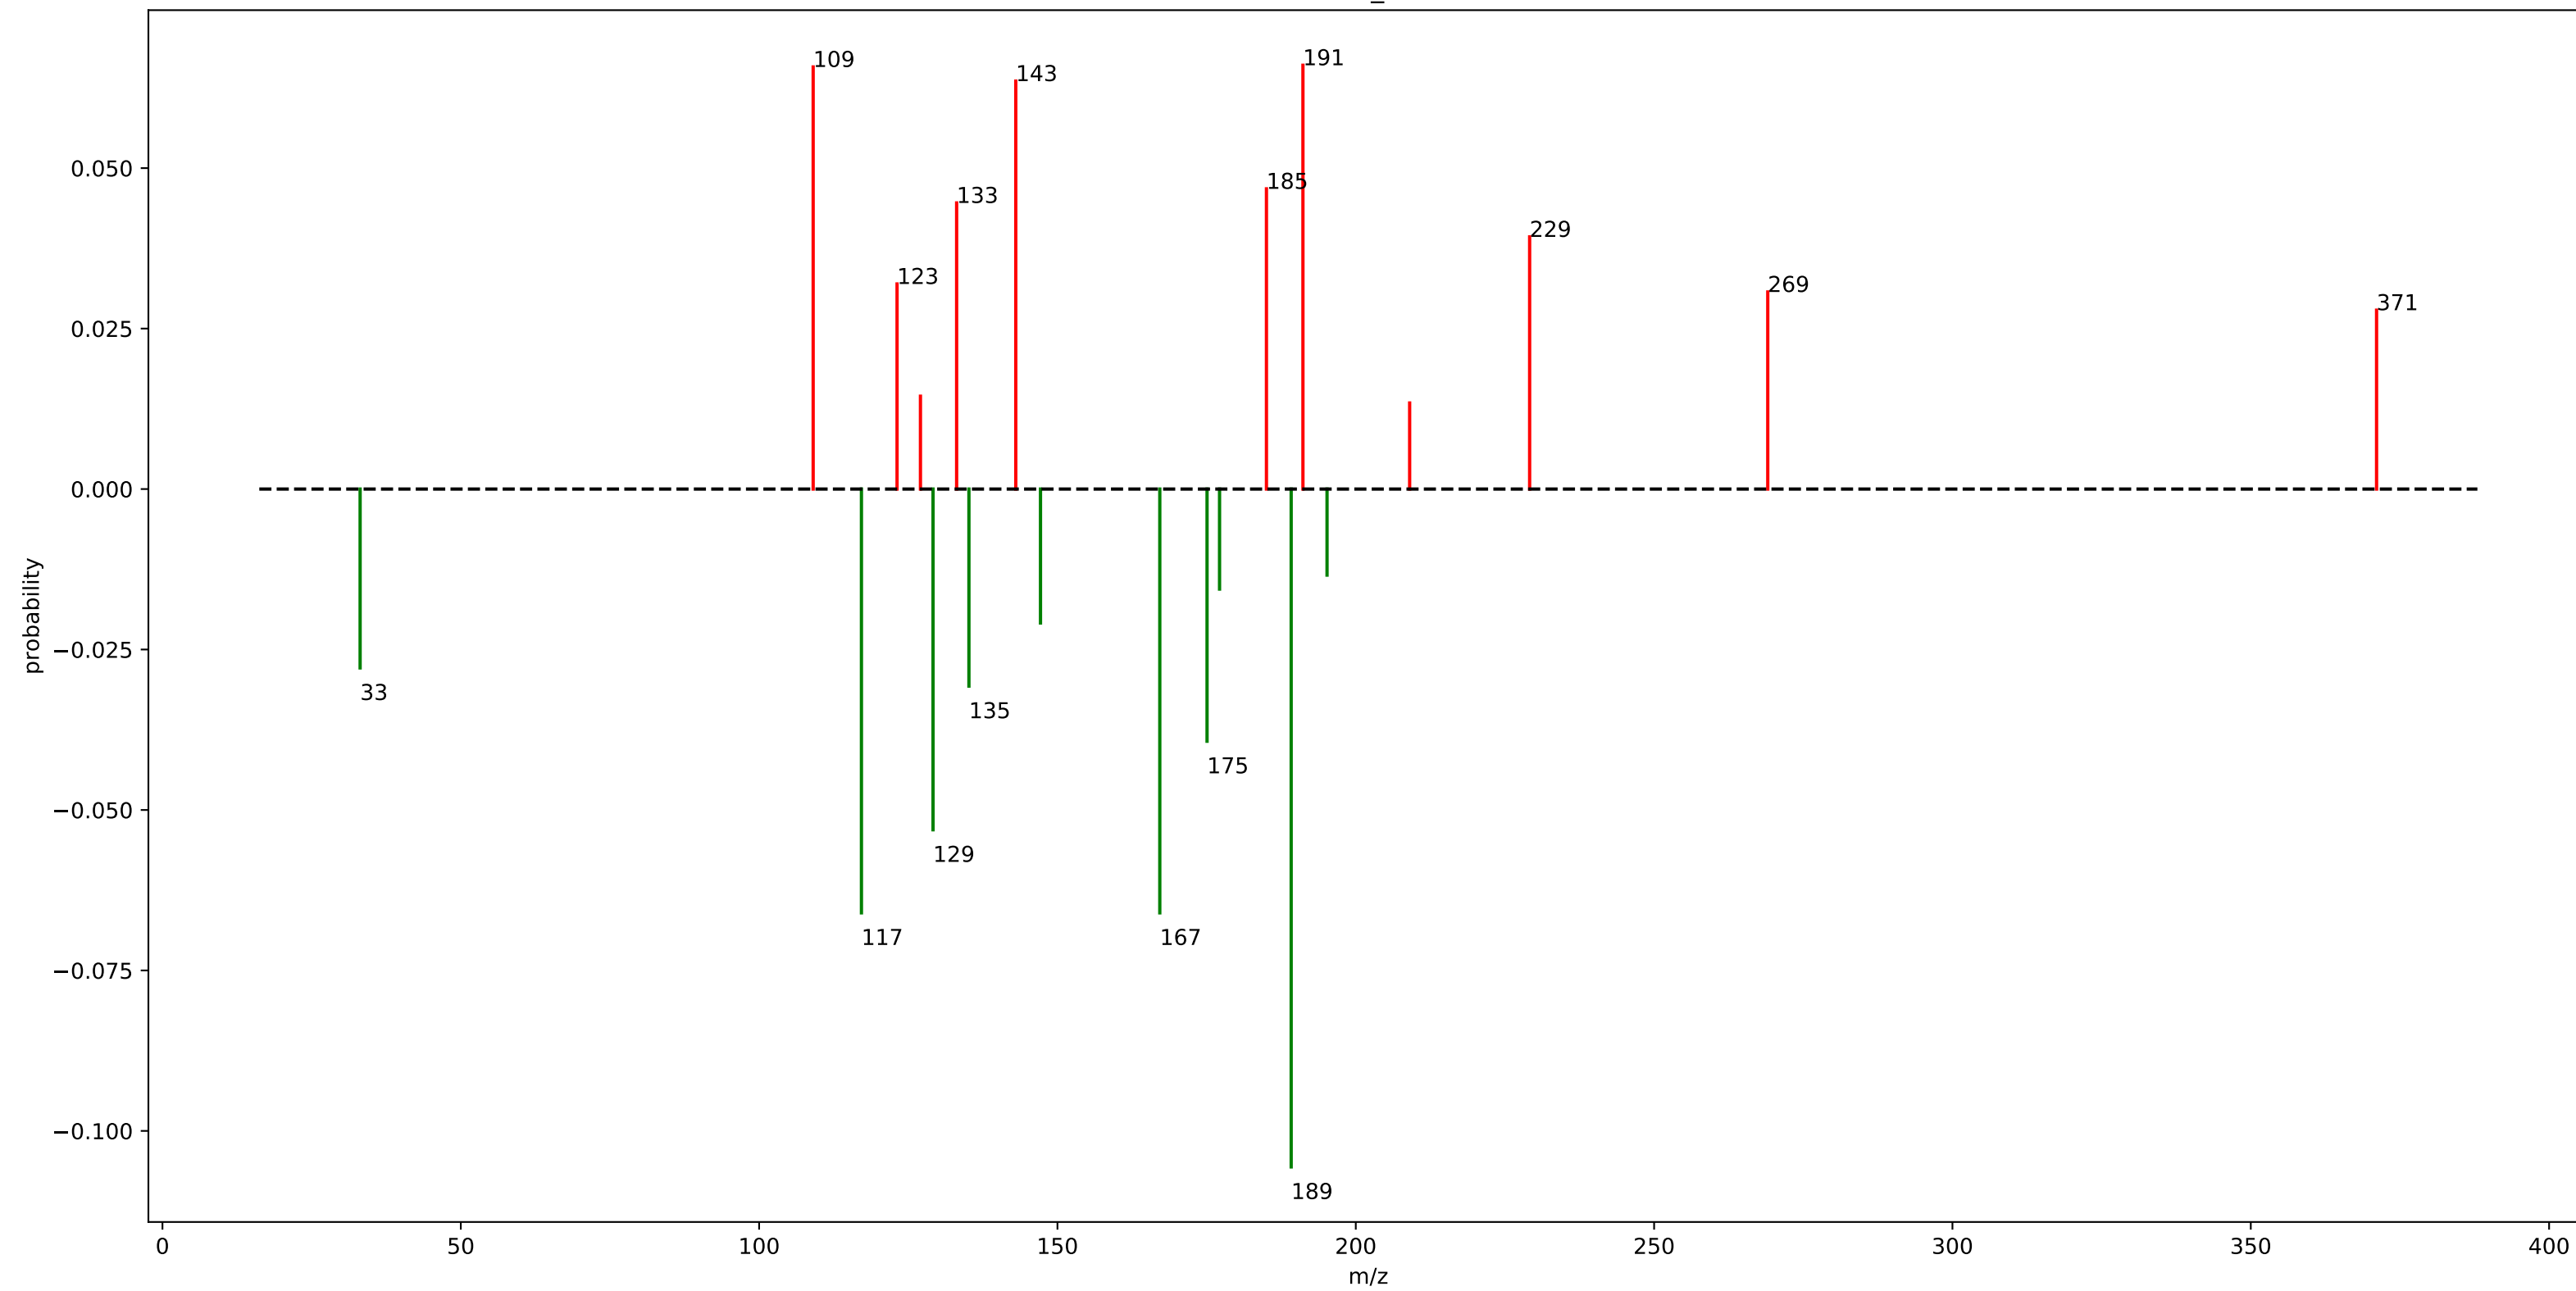

# motif\_671

|                   |        |                   |        |
|-------------------|--------|-------------------|--------|
| loss_189.1725     | : 0.11 | fragment_209.0275 | : 0.01 |
| fragment_191.1425 | : 0.07 |                   |        |
| loss_167.1525     | : 0.07 |                   |        |
| loss_117.1475     | : 0.07 |                   |        |
| fragment_109.0575 | : 0.07 |                   |        |
| fragment_143.0175 | : 0.06 |                   |        |
| loss_129.1475     | : 0.05 |                   |        |
| fragment_185.0275 | : 0.05 |                   |        |
| fragment_133.1025 | : 0.04 |                   |        |
| loss_175.0725     | : 0.04 |                   |        |
| fragment_229.1375 | : 0.04 |                   |        |
| fragment_123.1175 | : 0.03 |                   |        |
| loss_135.1625     | : 0.03 |                   |        |
| fragment_269.0475 | : 0.03 |                   |        |
| loss_33.1275      | : 0.03 |                   |        |
| fragment_371.0825 | : 0.03 |                   |        |
| loss_147.1575     | : 0.02 |                   |        |
| loss_177.1675     | : 0.02 |                   |        |
| fragment_127.0375 | : 0.01 |                   |        |
| loss_195.1825     | : 0.01 |                   |        |

motif\_579

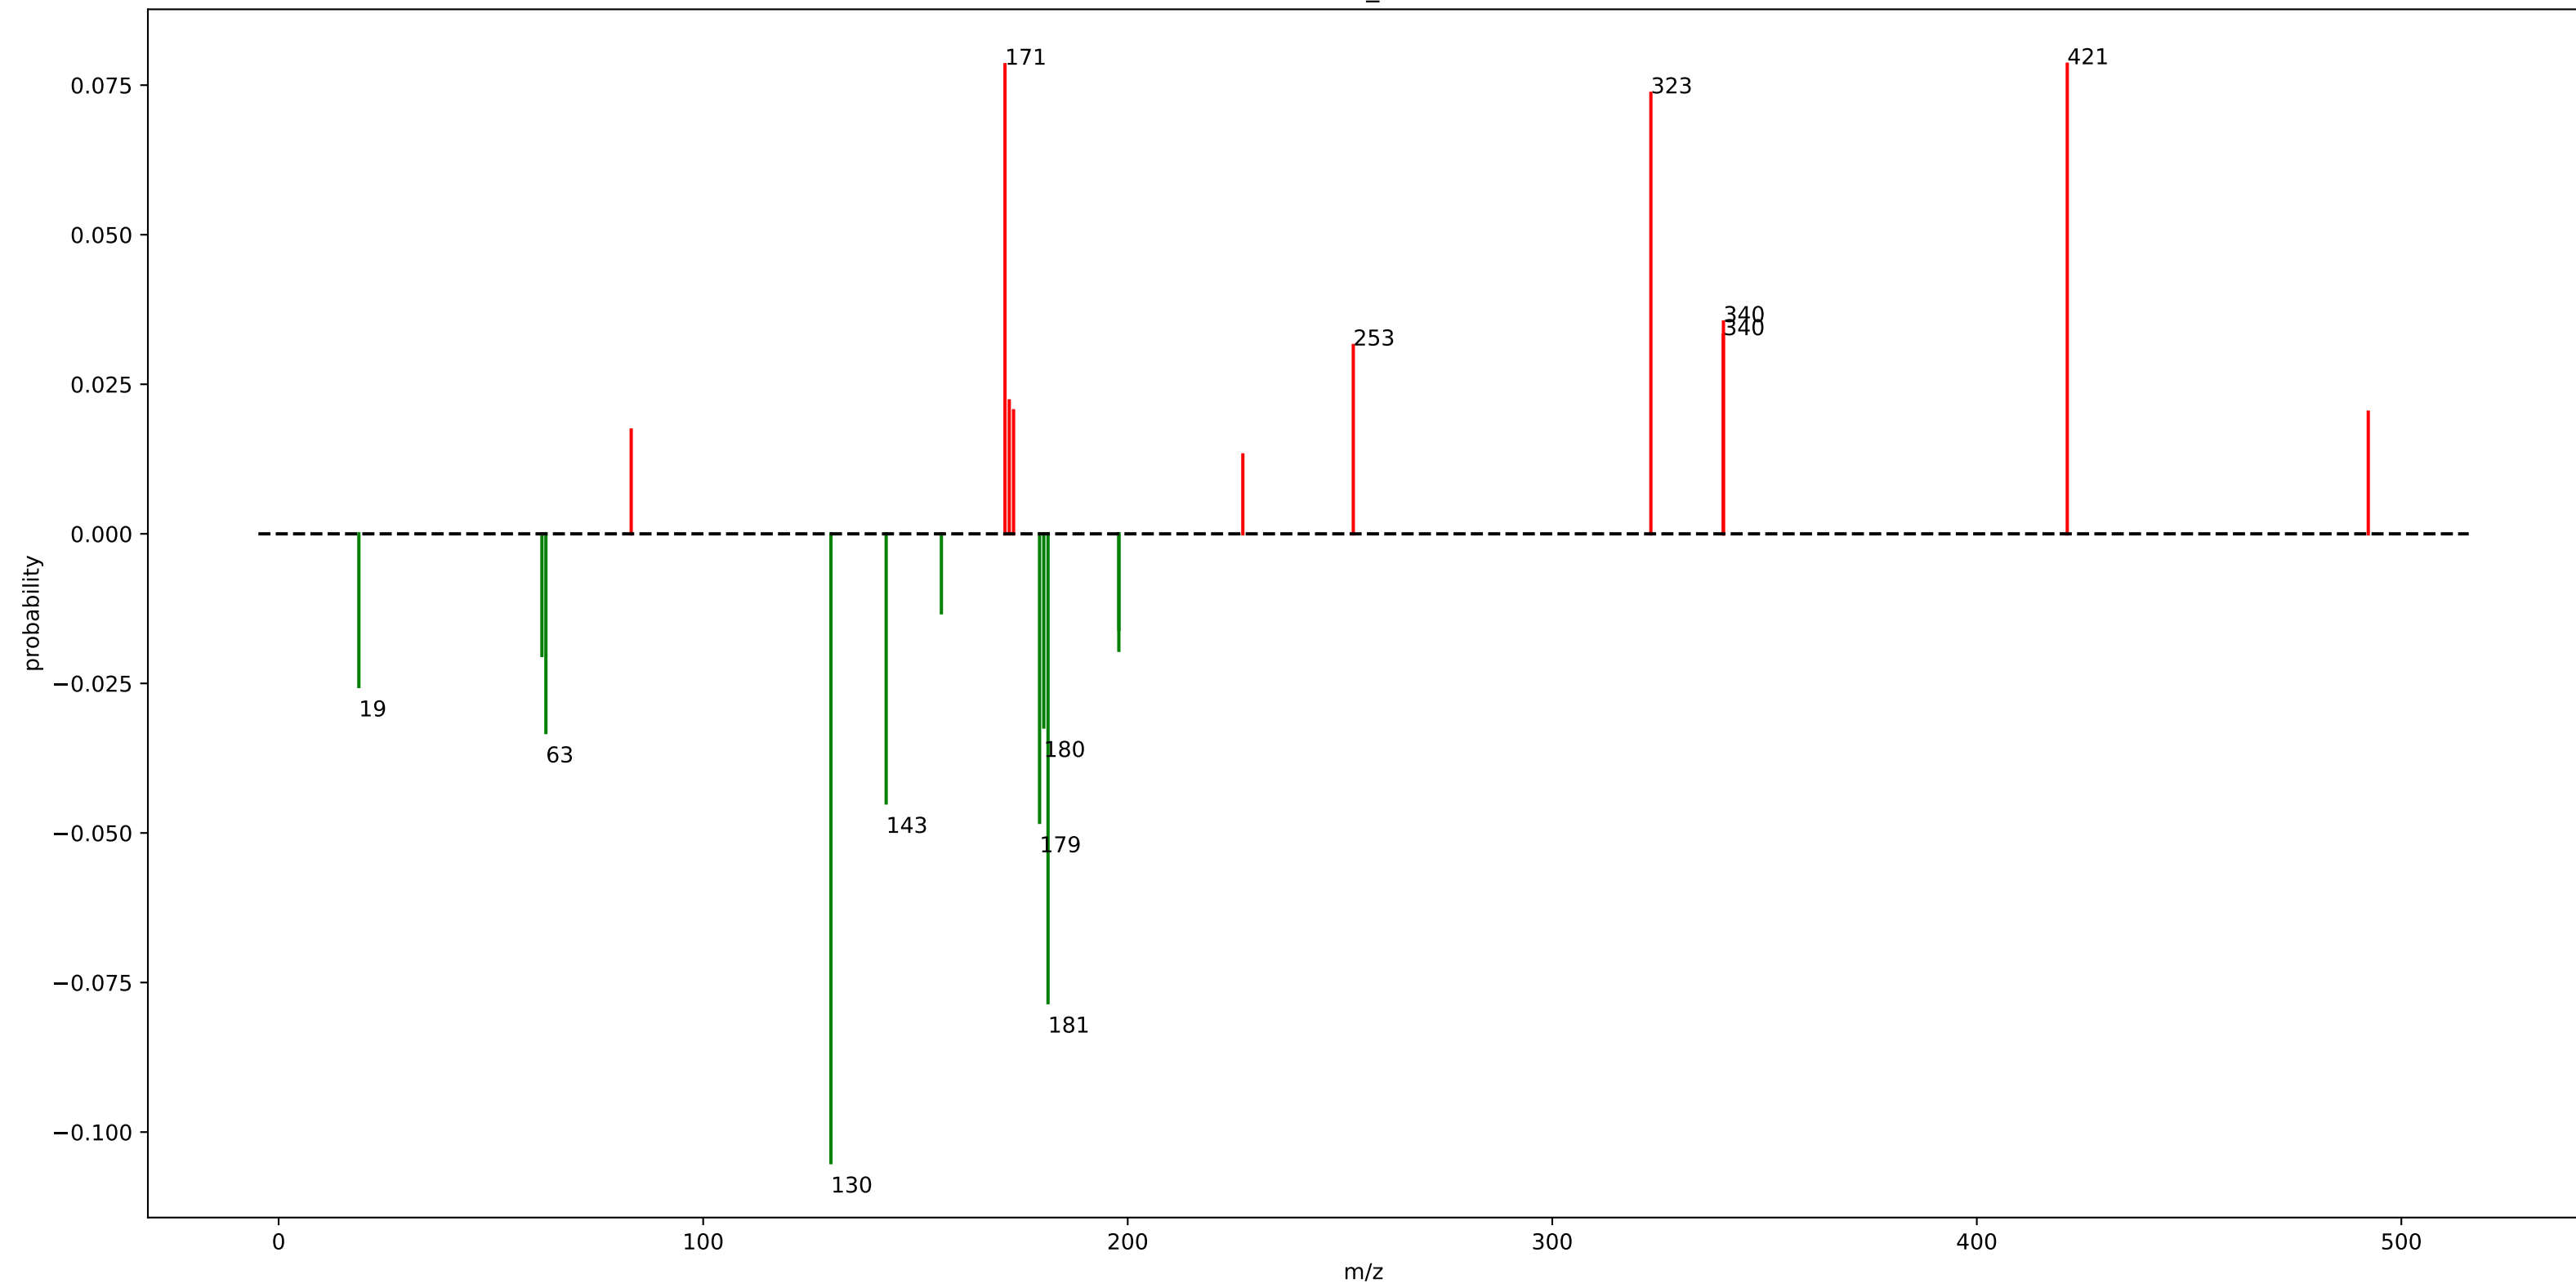

## motif\_579

|                   |        |                   |        |
|-------------------|--------|-------------------|--------|
| loss_130.0975     | : 0.11 | loss_156.1125     | : 0.01 |
| fragment_421.3075 | : 0.08 | fragment_227.1175 | : 0.01 |
| fragment_171.0925 | : 0.08 |                   |        |
| loss_181.2325     | : 0.08 |                   |        |
| fragment_323.2325 | : 0.07 |                   |        |
| loss_179.2375     | : 0.05 |                   |        |
| loss_143.1025     | : 0.04 |                   |        |
| fragment_340.3225 | : 0.04 |                   |        |
| loss_62.9575      | : 0.03 |                   |        |
| fragment_340.2875 | : 0.03 |                   |        |
| loss_180.2325     | : 0.03 |                   |        |
| fragment_253.1325 | : 0.03 |                   |        |
| loss_18.8975      | : 0.03 |                   |        |
| fragment_172.0975 | : 0.02 |                   |        |
| fragment_173.1075 | : 0.02 |                   |        |
| fragment_492.2125 | : 0.02 |                   |        |
| loss_62.0175      | : 0.02 |                   |        |
| loss_197.9125     | : 0.02 |                   |        |
| fragment_83.0475  | : 0.02 |                   |        |
| loss_197.9275     | : 0.02 |                   |        |

urine\_mass2motif\_39.m2m

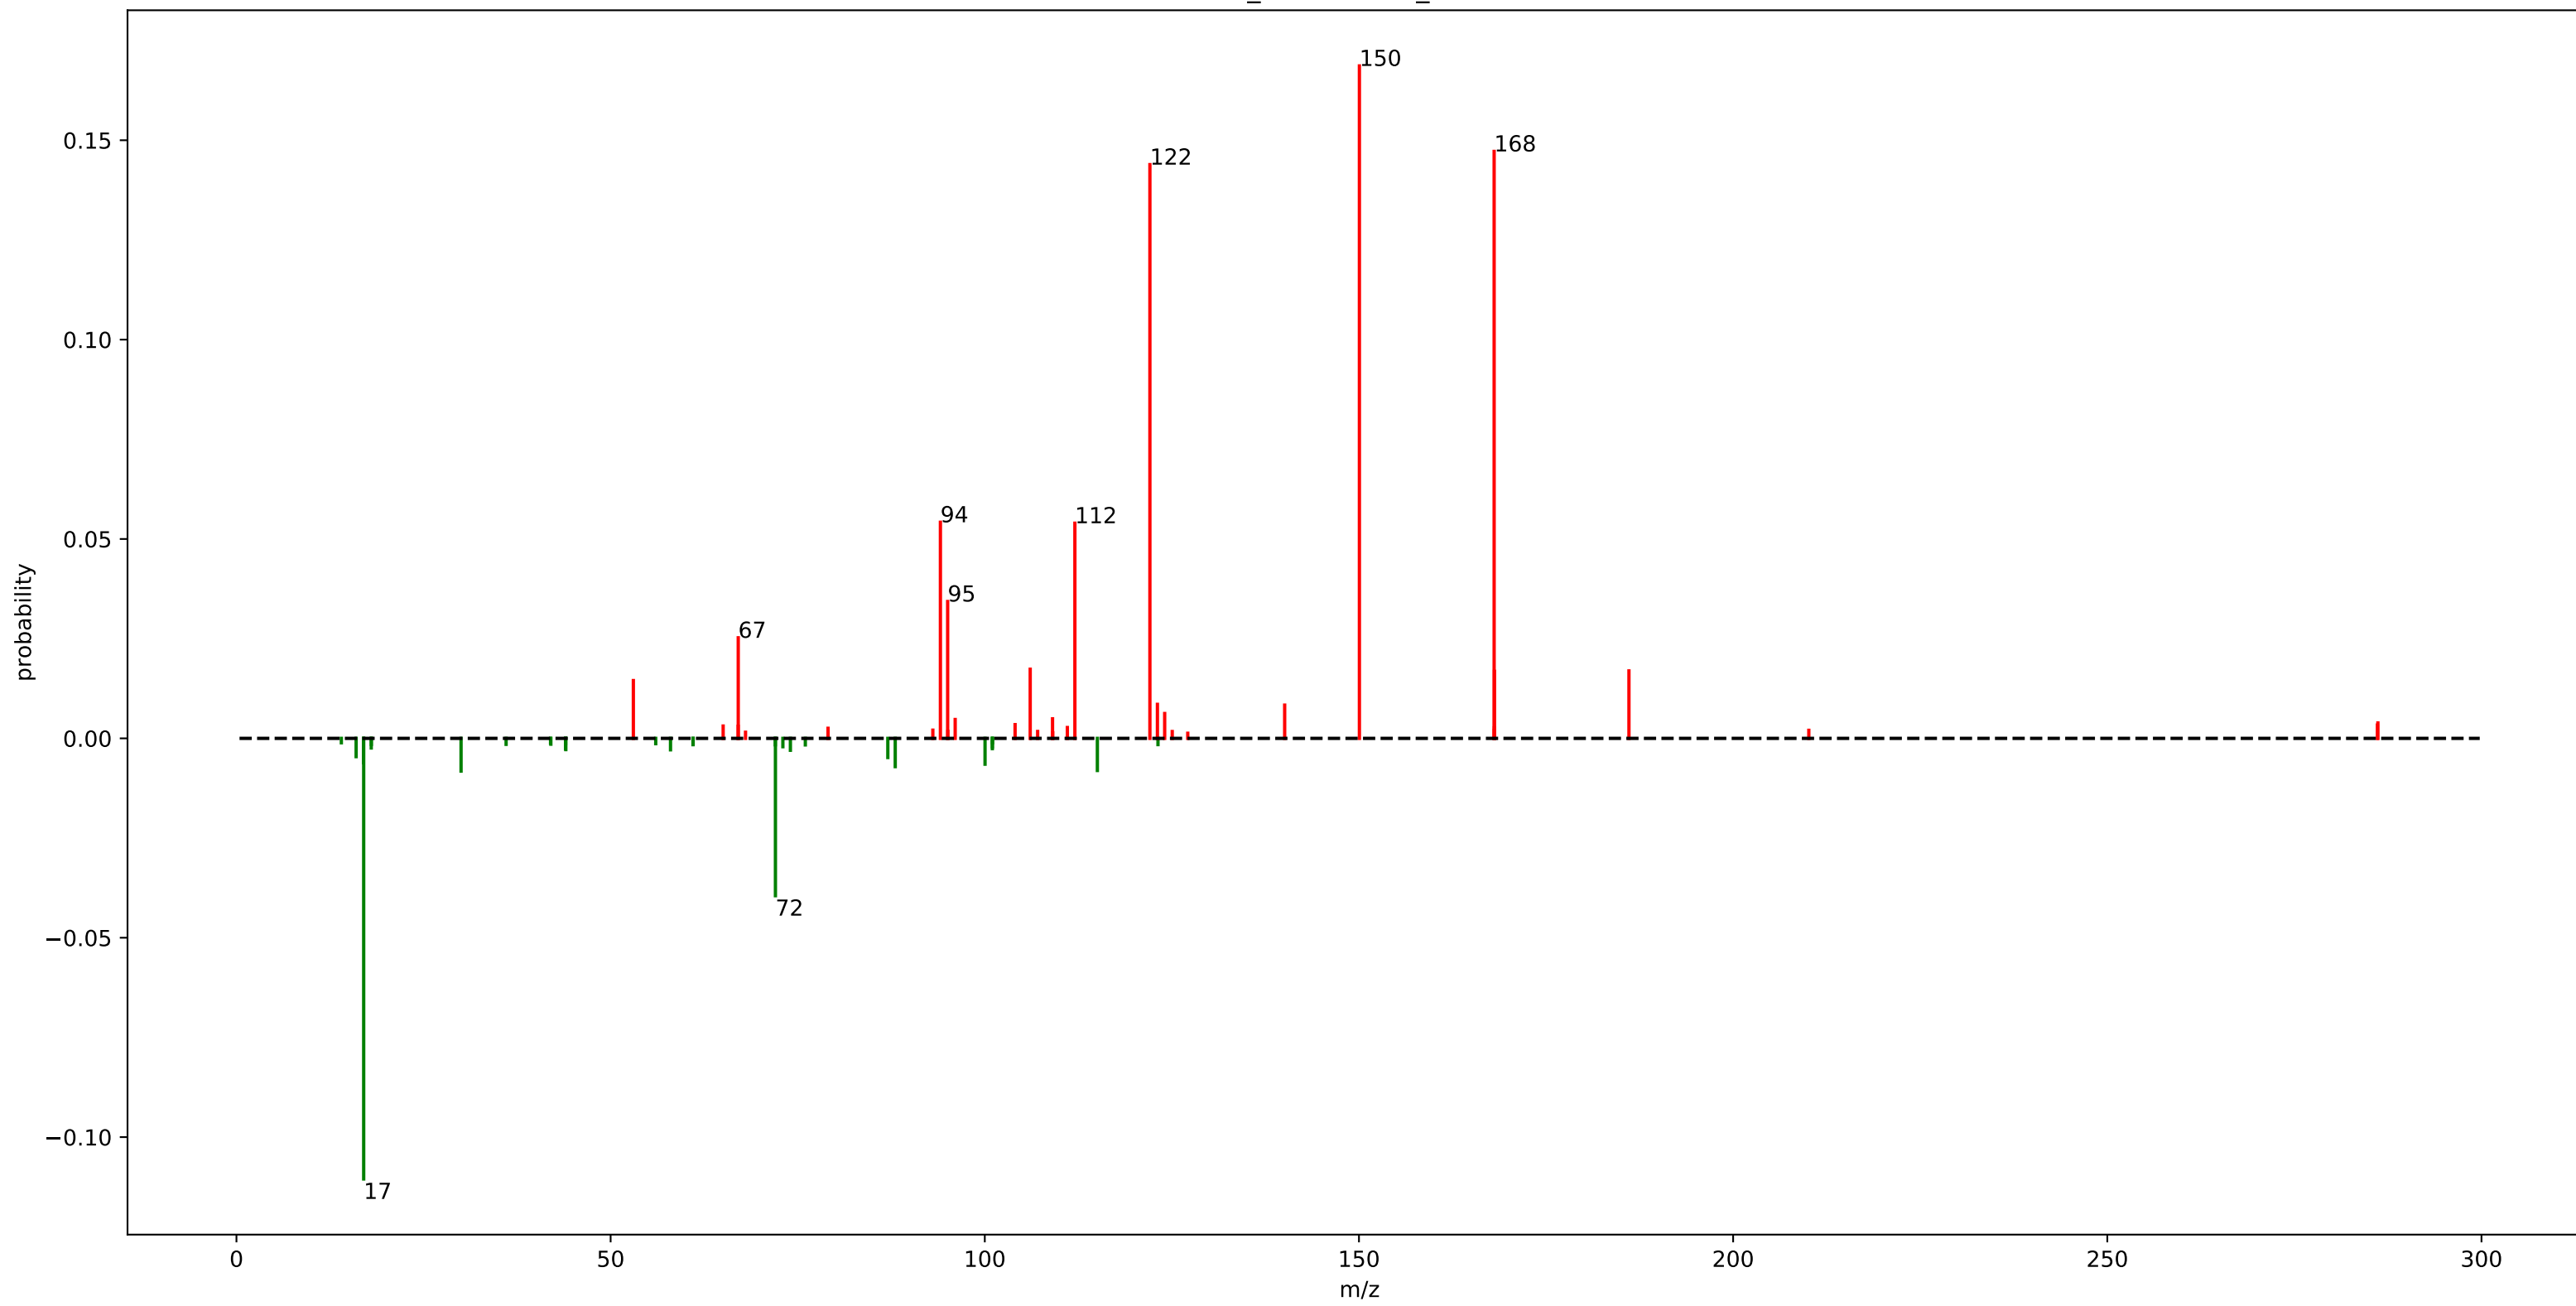

## urine\_mass2motif\_39.m2m

|                   |        |              |        |
|-------------------|--------|--------------|--------|
| fragment_150.0575 | : 0.17 | loss_16.9775 | : 0.01 |
| fragment_168.0625 | : 0.15 |              |        |
| fragment_122.0625 | : 0.14 |              |        |
| loss_17.0025      | : 0.11 |              |        |
| fragment_94.0675  | : 0.05 |              |        |
| fragment_112.0375 | : 0.05 |              |        |
| loss_72.0225      | : 0.04 |              |        |
| fragment_95.0375  | : 0.03 |              |        |
| fragment_67.0525  | : 0.03 |              |        |
| fragment_106.0675 | : 0.02 |              |        |
| fragment_186.0775 | : 0.02 |              |        |
| fragment_168.1025 | : 0.02 |              |        |
| fragment_53.0375  | : 0.01 |              |        |
| fragment_123.0675 | : 0.01 |              |        |
| fragment_140.0725 | : 0.01 |              |        |
| loss_30.0125      | : 0.01 |              |        |
| loss_115.0425     | : 0.01 |              |        |
| loss_88.0325      | : 0.01 |              |        |
| loss_100.0325     | : 0.01 |              |        |
| fragment_124.0375 | : 0.01 |              |        |

motif\_674

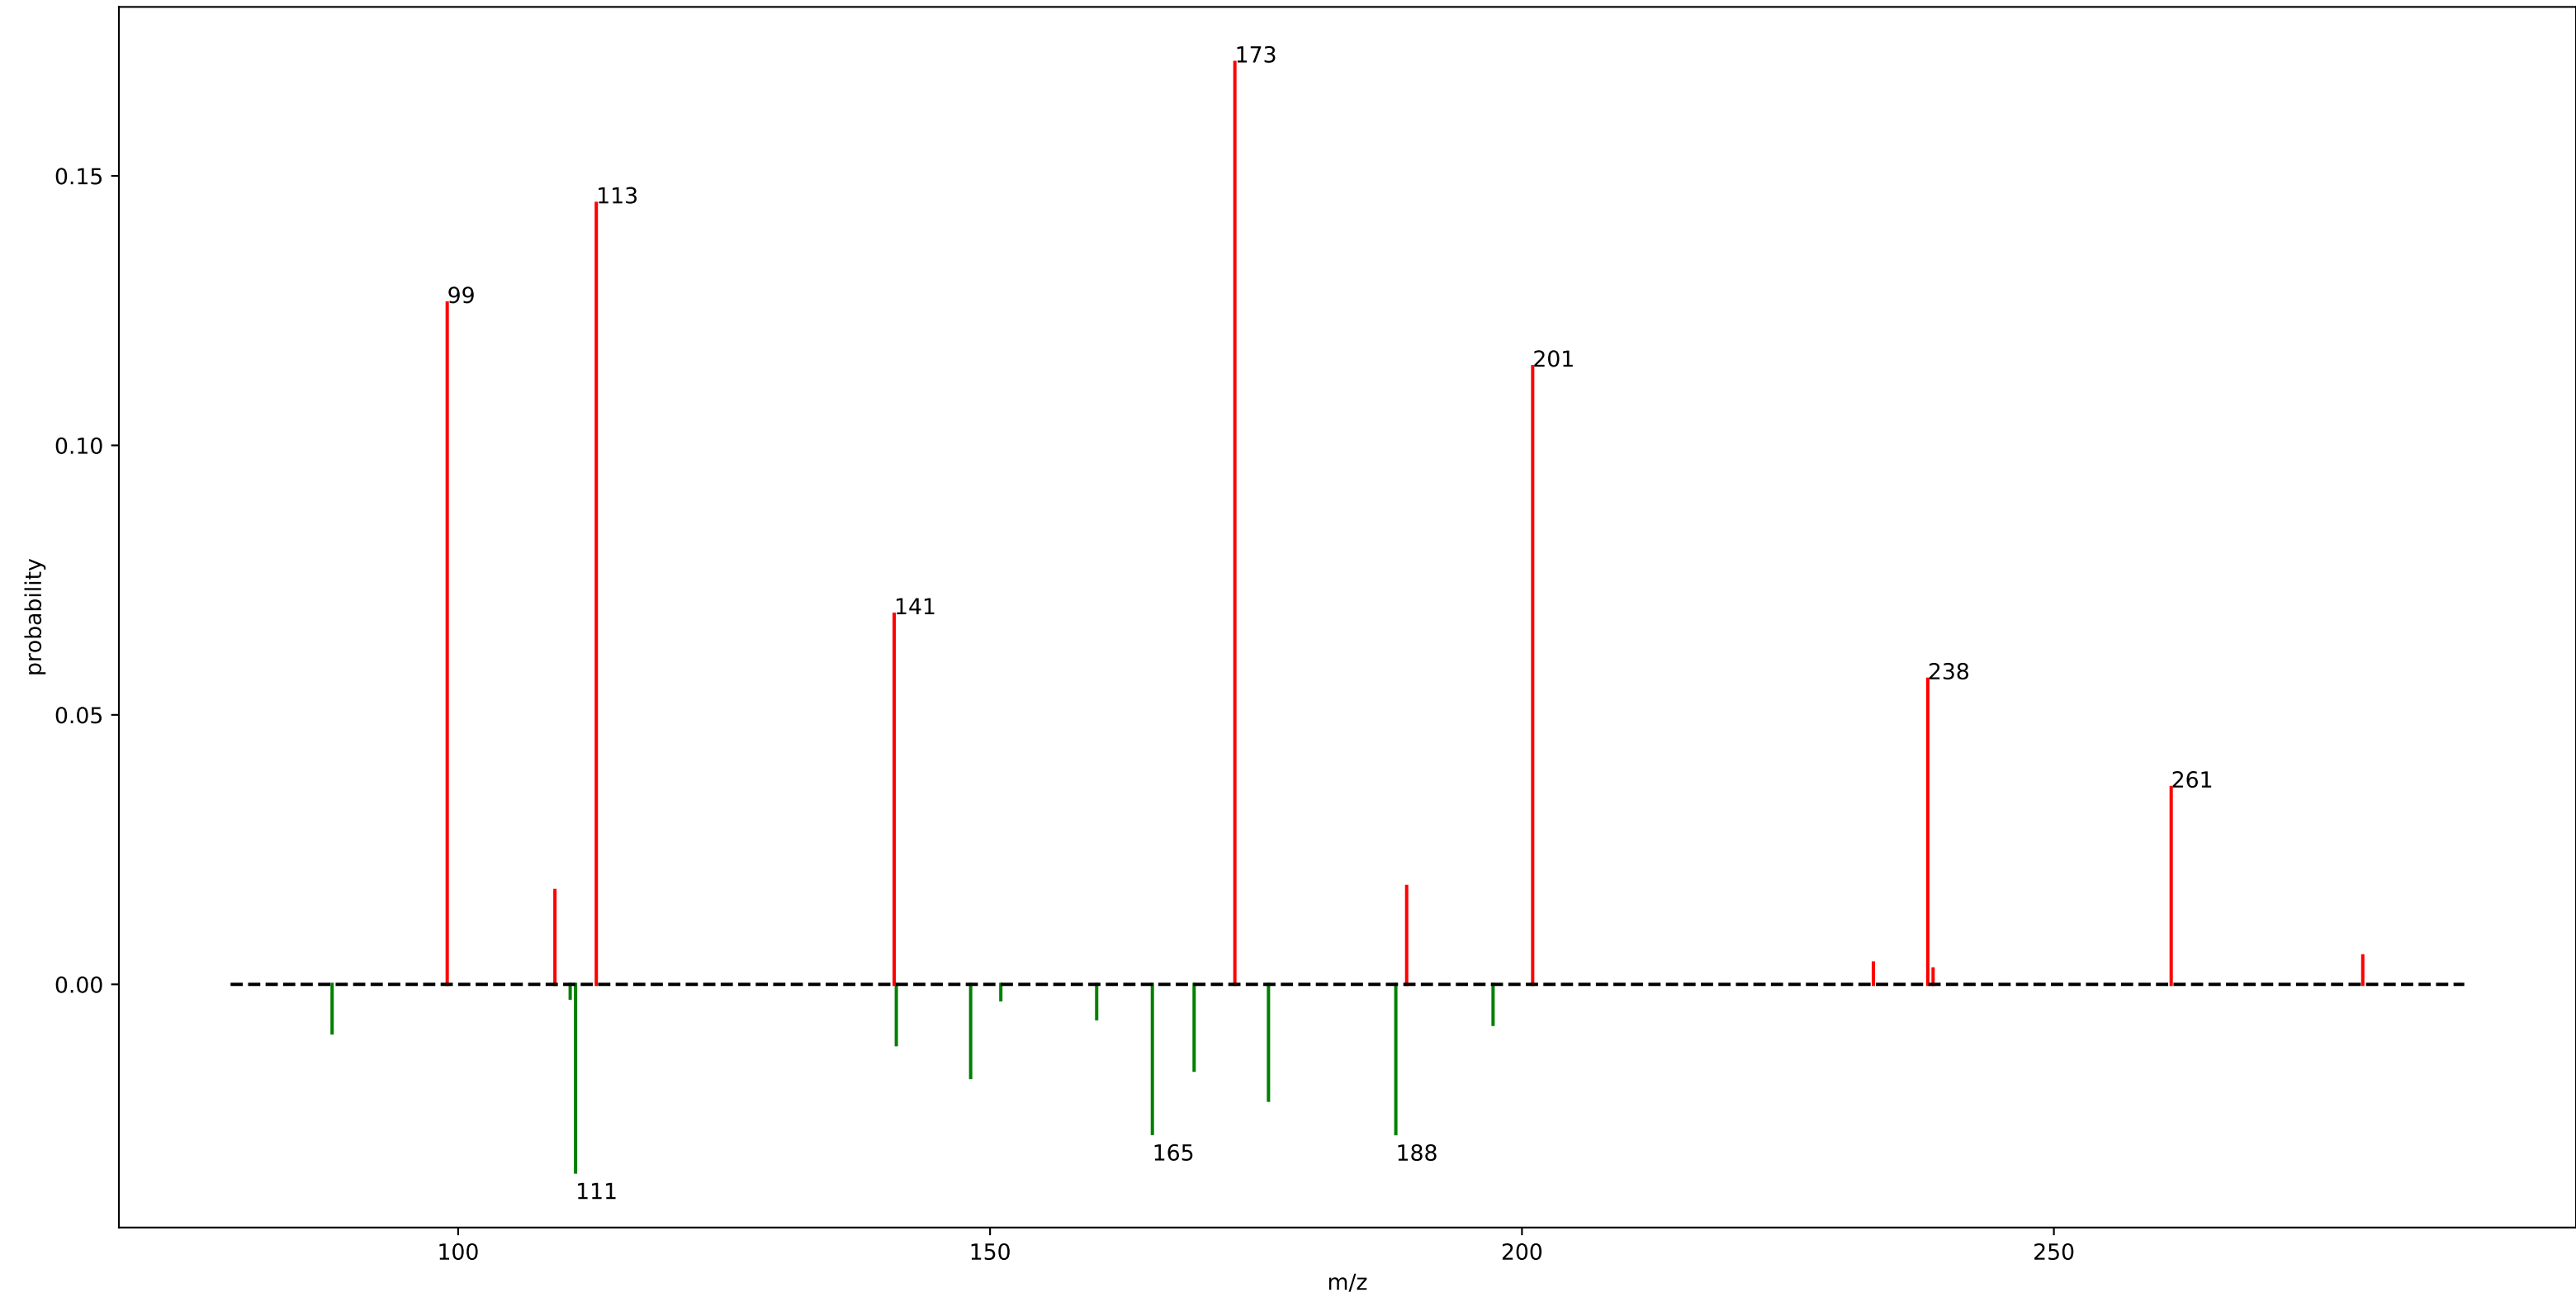

## motif\_674

|                   |        |
|-------------------|--------|
| fragment_173.0125 | : 0.17 |
| fragment_112.9875 | : 0.14 |
| fragment_98.9725  | : 0.13 |
| fragment_201.0075 | : 0.11 |
| fragment_140.9875 | : 0.07 |
| fragment_238.1475 | : 0.06 |
| fragment_261.0275 | : 0.04 |
| loss_111.0375     | : 0.03 |
| loss_188.1425     | : 0.03 |
| loss_165.2575     | : 0.03 |
| loss_176.1725     | : 0.02 |
| fragment_189.1625 | : 0.02 |
| fragment_109.0975 | : 0.02 |
| loss_148.1775     | : 0.02 |
| loss_169.1825     | : 0.02 |
| loss_141.1875     | : 0.01 |
| loss_88.1525      | : 0.01 |
| loss_197.2825     | : 0.01 |
| loss_160.0225     | : 0.01 |
| fragment_279.0375 | : 0.01 |



motif\_675

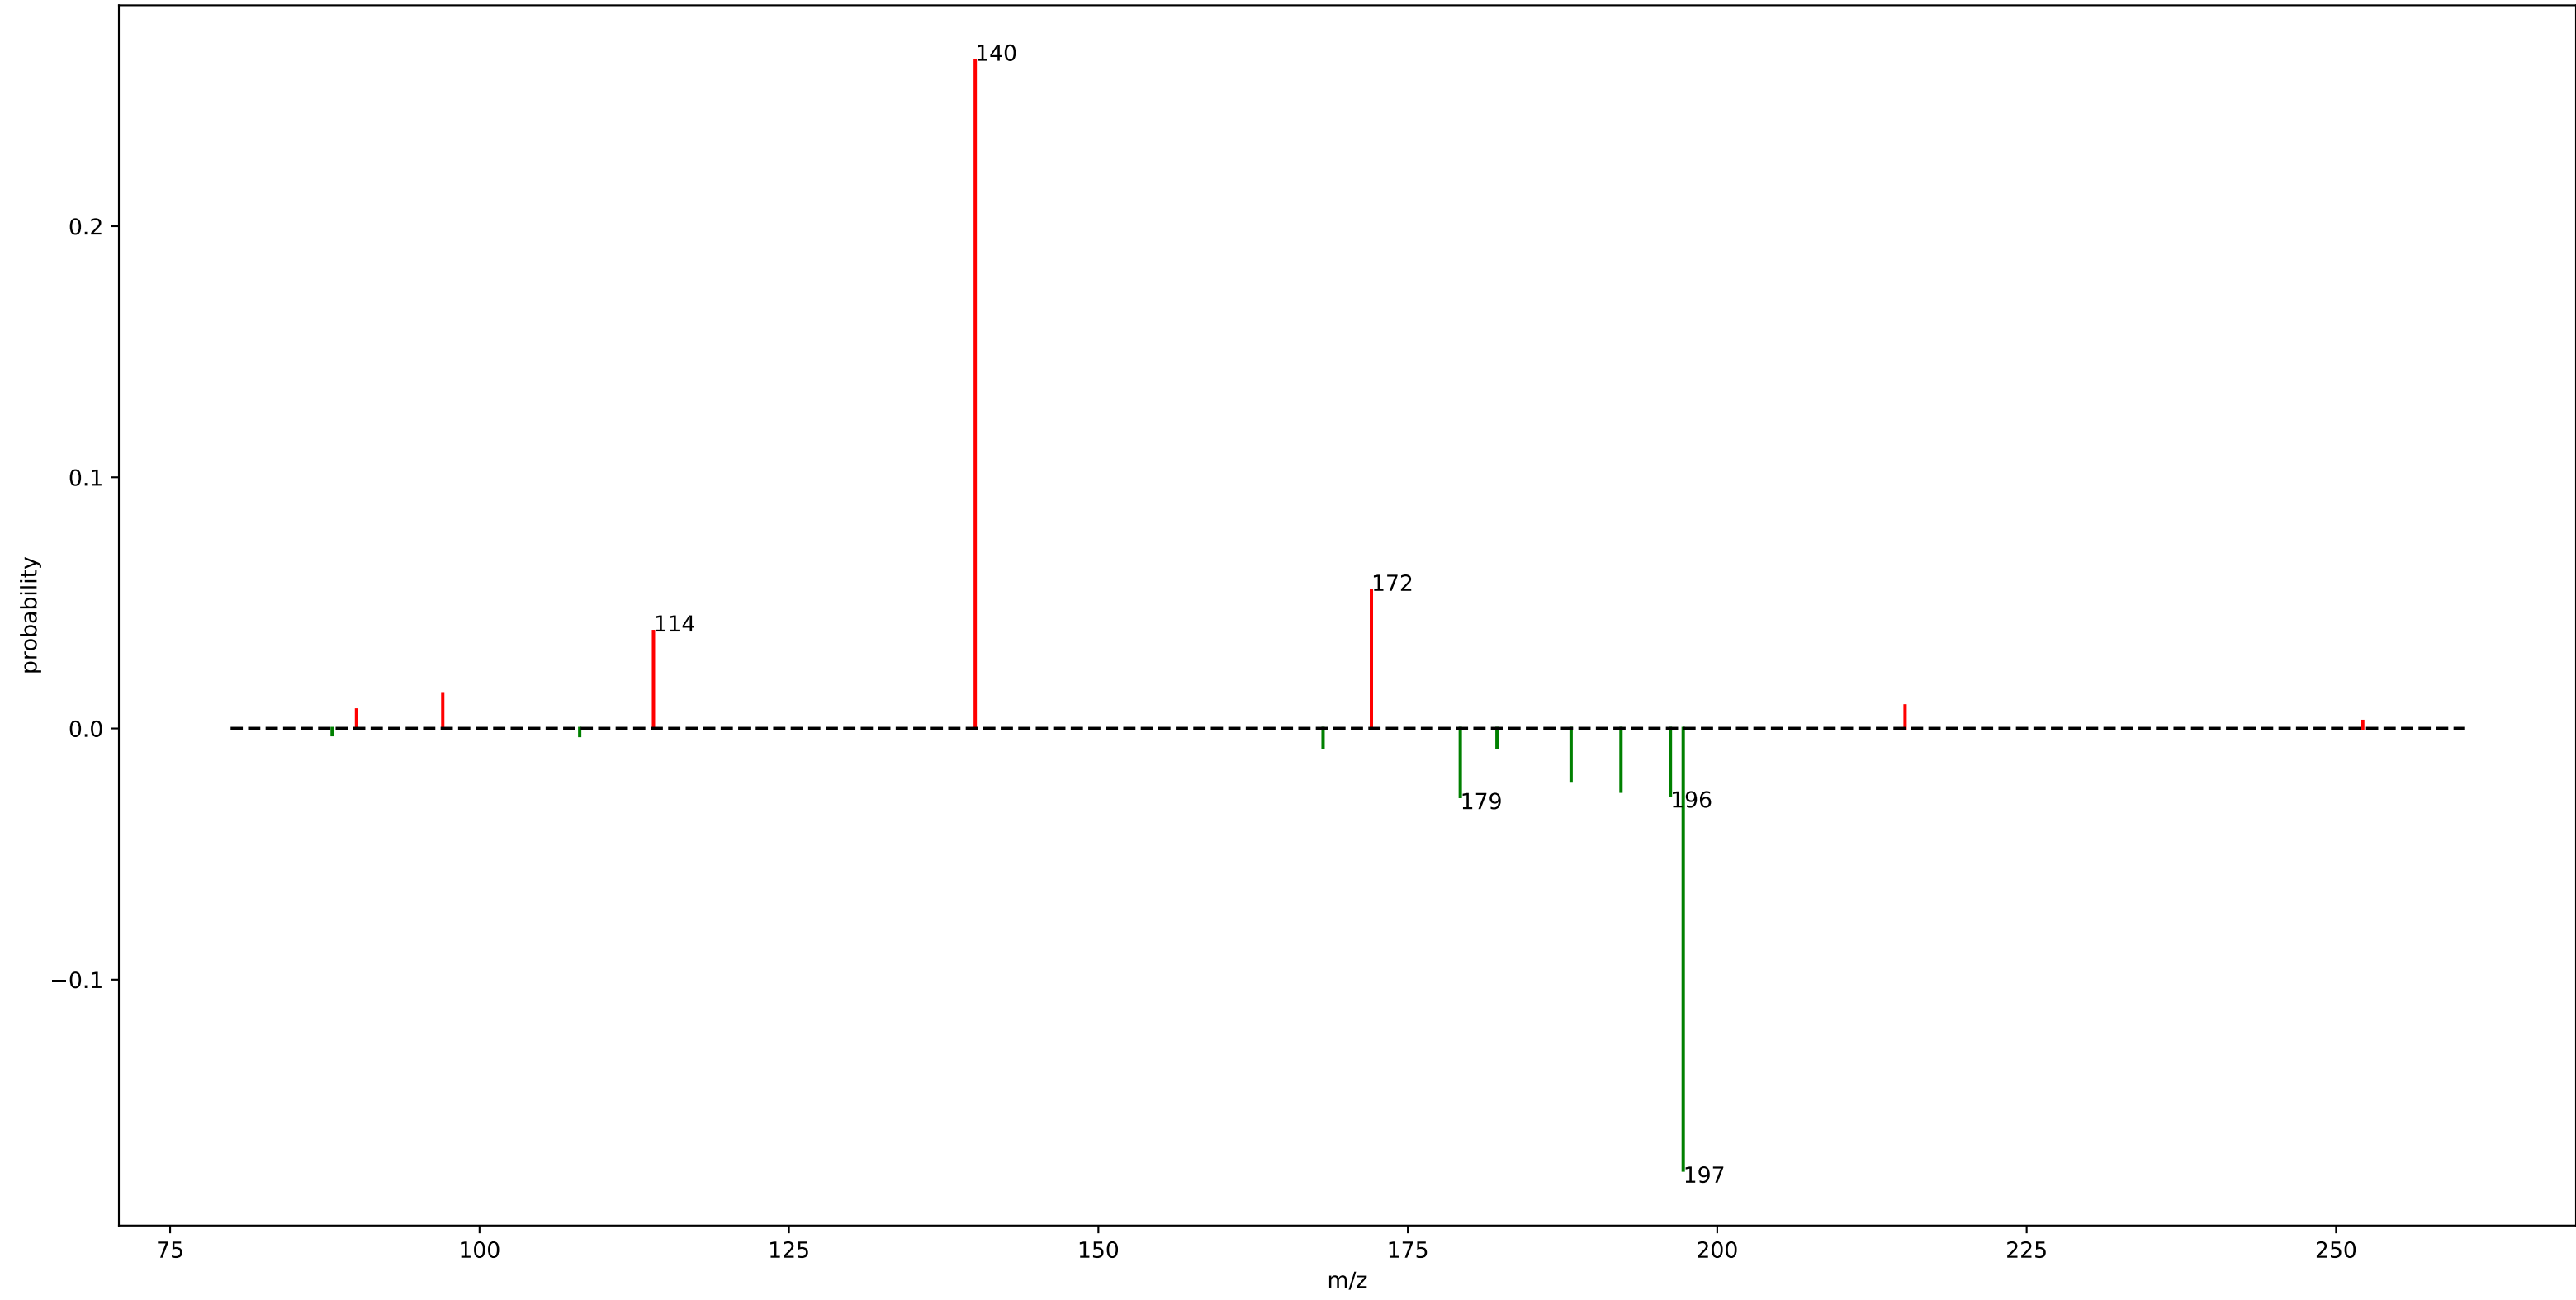

## motif\_675

|                   |        |
|-------------------|--------|
| fragment_140.0475 | : 0.27 |
| loss_197.2525     | : 0.18 |
| fragment_172.0575 | : 0.05 |
| fragment_114.0525 | : 0.04 |
| loss_179.2375     | : 0.03 |
| loss_196.2175     | : 0.03 |
| loss_192.2225     | : 0.02 |
| loss_188.1925     | : 0.02 |
| fragment_97.0275  | : 0.01 |
| fragment_215.1775 | : 0.01 |
| loss_182.2025     | : 0.01 |
| loss_168.1525     | : 0.01 |
| fragment_90.0575  | : 0.01 |

gnps\_motif\_115.m2m

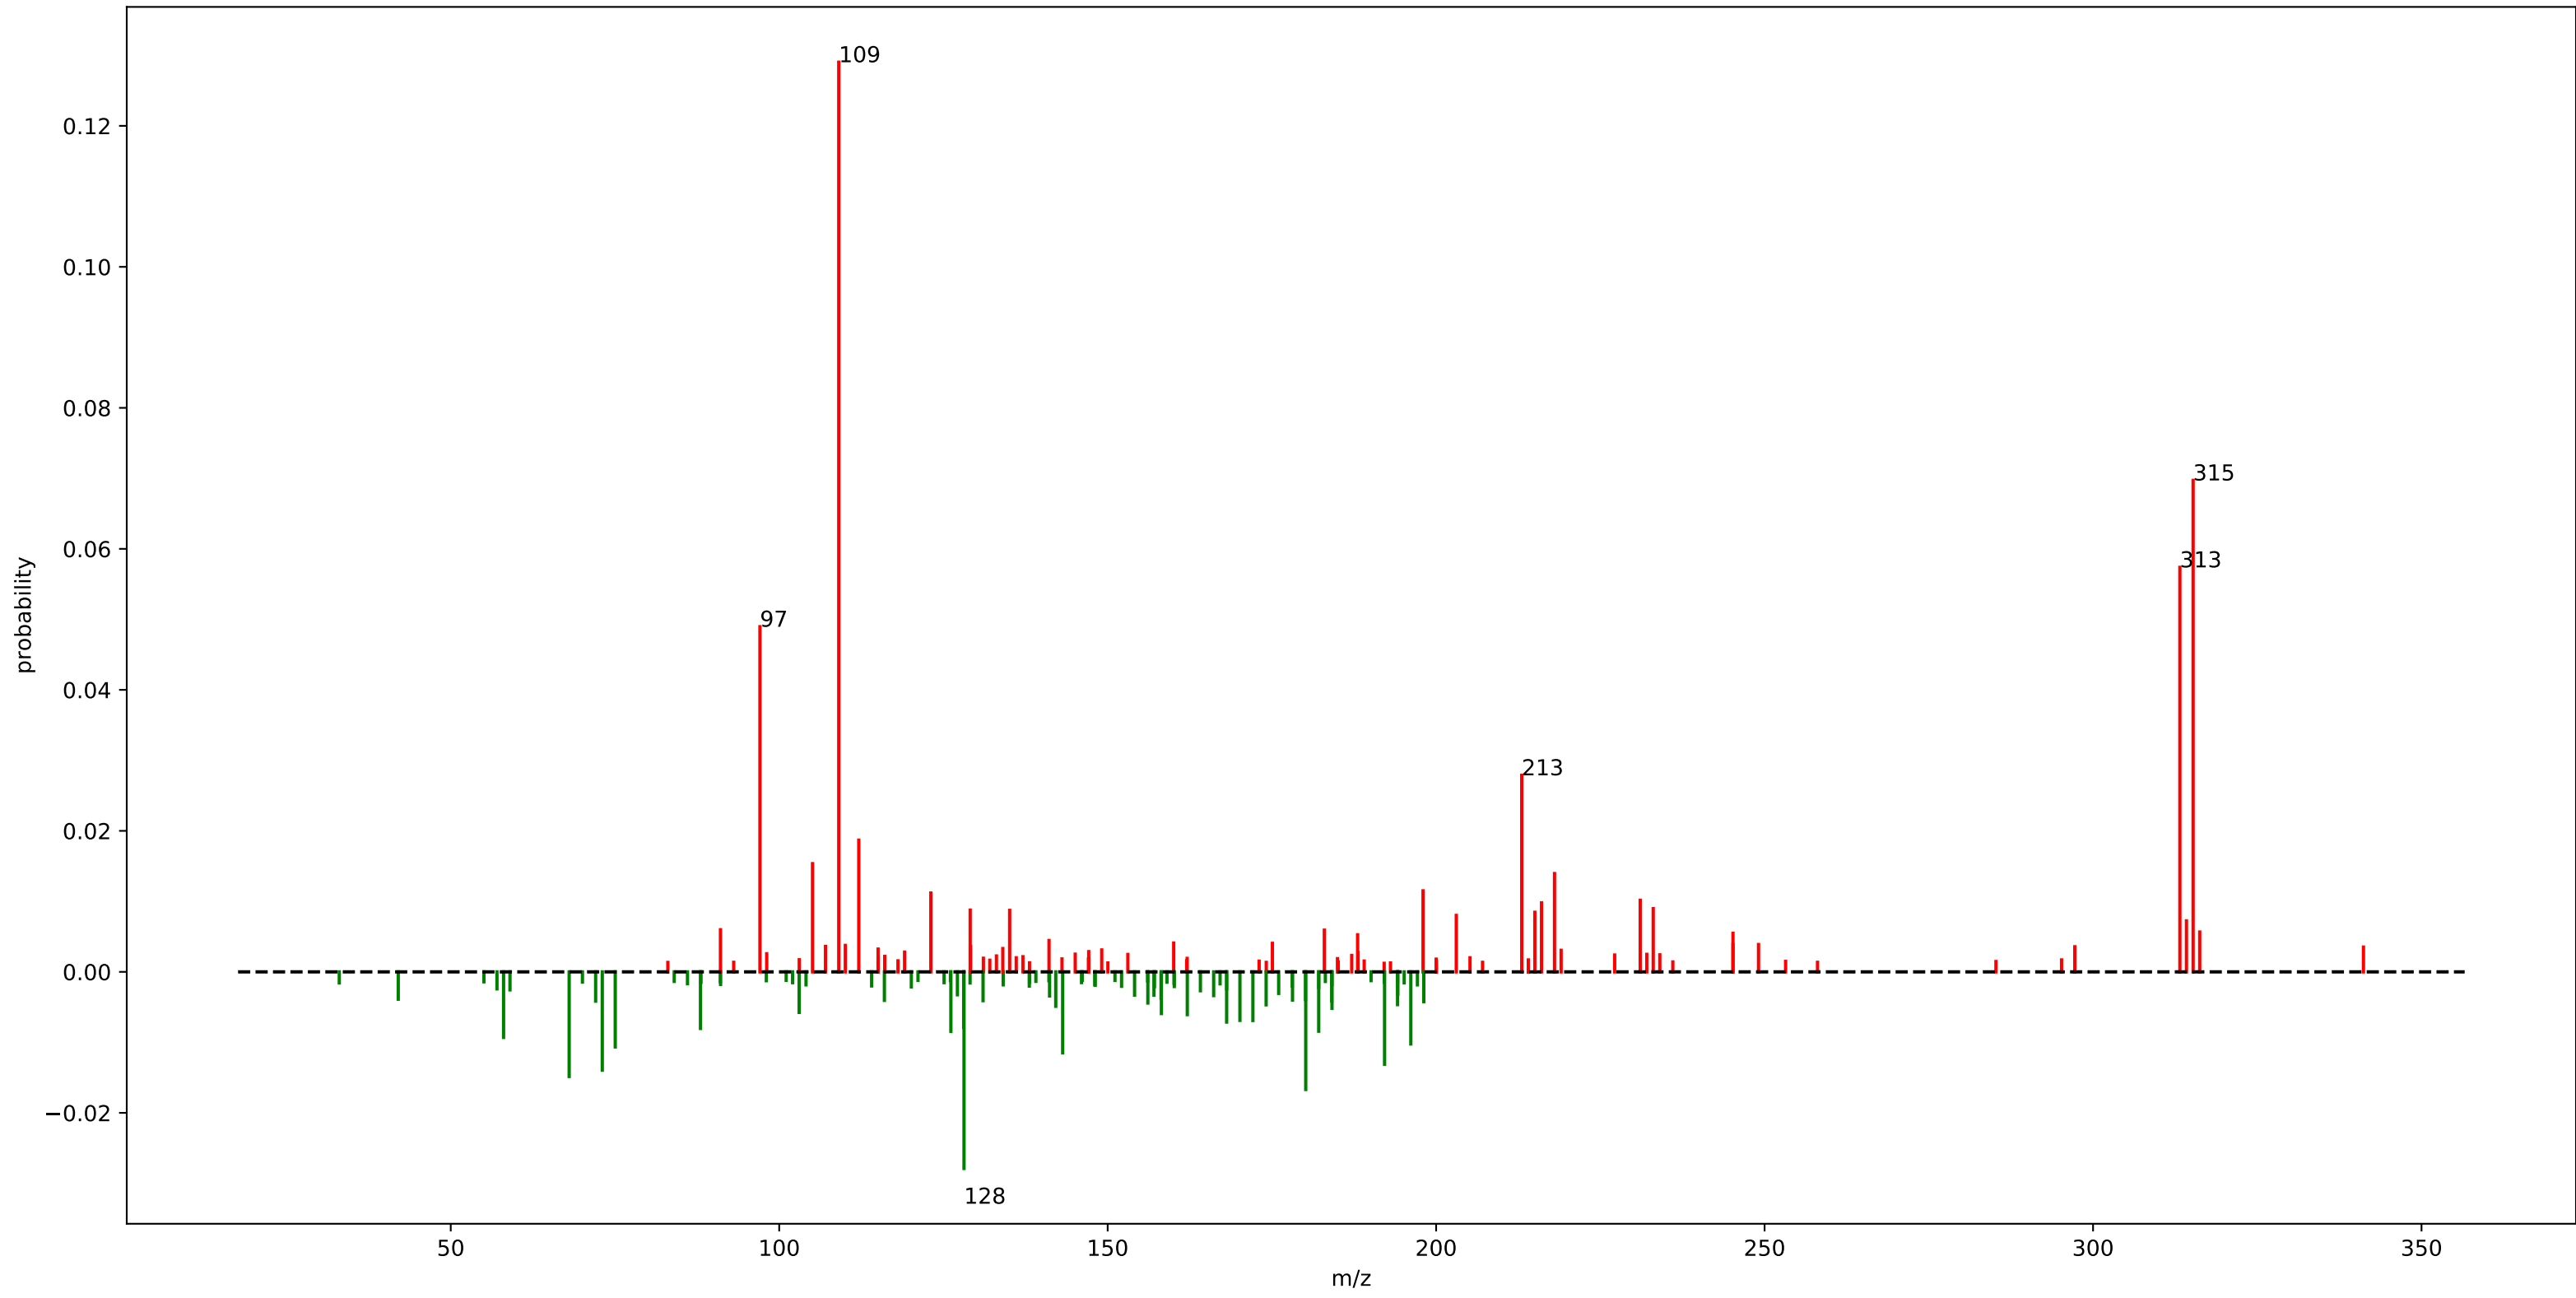

# gnps\_motif\_115.m2m

|                   |        |                   |        |                   |        |
|-------------------|--------|-------------------|--------|-------------------|--------|
| fragment_109.0675 | : 0.13 | loss_58.0425      | : 0.01 | fragment_245.1875 | : 0.01 |
| fragment_315.2325 | : 0.07 | fragment_233.0475 | : 0.01 | fragment_188.0475 | : 0.01 |
| fragment_313.2175 | : 0.06 | fragment_129.0725 | : 0.01 | loss_184.1475     | : 0.01 |
| fragment_97.0675  | : 0.05 | fragment_135.0825 | : 0.01 |                   |        |
| fragment_213.0325 | : 0.03 | fragment_215.0275 | : 0.01 |                   |        |
| loss_128.1325     | : 0.03 | loss_126.1325     | : 0.01 |                   |        |
| fragment_112.1125 | : 0.02 | loss_182.1275     | : 0.01 |                   |        |
| loss_180.1525     | : 0.02 | loss_88.0175      | : 0.01 |                   |        |
| fragment_105.0725 | : 0.02 | fragment_203.0675 | : 0.01 |                   |        |
| loss_68.0275      | : 0.01 | loss_128.0825     | : 0.01 |                   |        |
| fragment_218.0225 | : 0.01 | fragment_314.2175 | : 0.01 |                   |        |
| loss_73.0675      | : 0.01 | loss_168.1125     | : 0.01 |                   |        |
| loss_192.1525     | : 0.01 | loss_172.1075     | : 0.01 |                   |        |
| fragment_198.0075 | : 0.01 | loss_170.1325     | : 0.01 |                   |        |
| loss_143.1525     | : 0.01 | loss_162.1225     | : 0.01 |                   |        |
| fragment_123.0825 | : 0.01 | fragment_91.0575  | : 0.01 |                   |        |
| loss_75.0425      | : 0.01 | fragment_182.9825 | : 0.01 |                   |        |
| loss_196.1475     | : 0.01 | loss_158.1775     | : 0.01 |                   |        |
| fragment_231.0675 | : 0.01 | loss_103.0375     | : 0.01 |                   |        |
| fragment_216.0425 | : 0.01 | fragment_316.2375 | : 0.01 |                   |        |

mb\_motif\_10.m2m

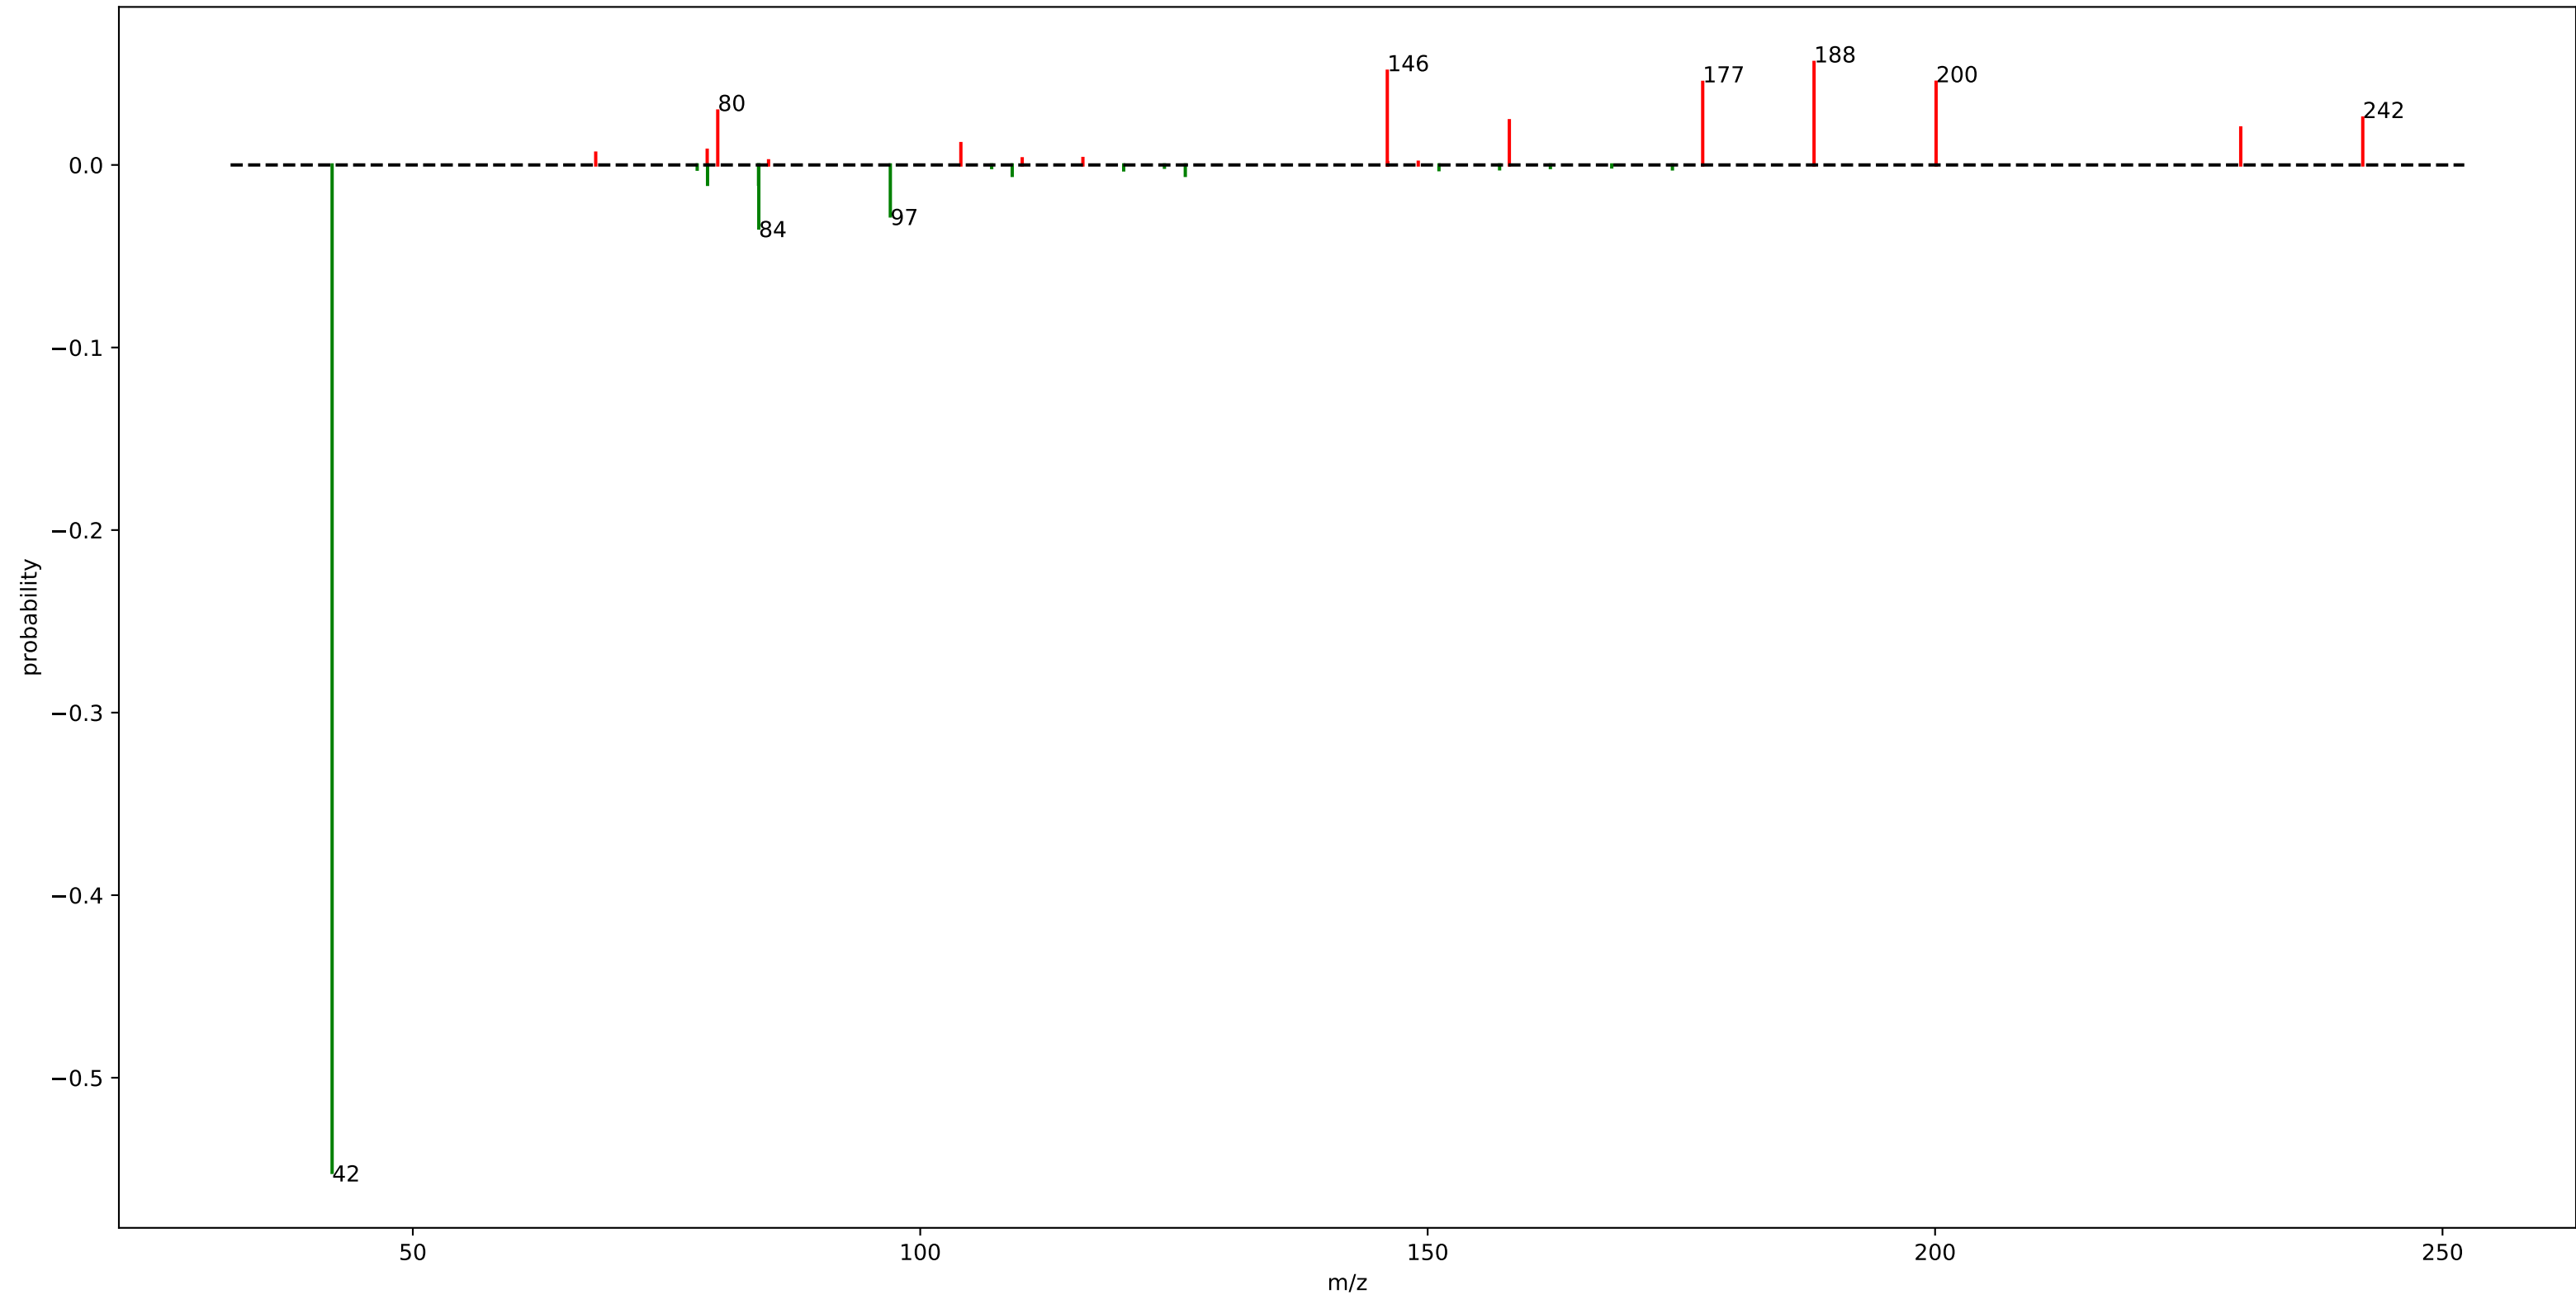

## mb\_motif\_10.m2m

|                   |        |
|-------------------|--------|
| loss_42.0475      | : 0.55 |
| fragment_188.0725 | : 0.06 |
| fragment_146.0225 | : 0.05 |
| fragment_200.0975 | : 0.05 |
| fragment_177.1025 | : 0.05 |
| loss_84.0925      | : 0.03 |
| fragment_80.0475  | : 0.03 |
| loss_97.0525      | : 0.03 |
| fragment_242.1425 | : 0.03 |
| fragment_158.0475 | : 0.02 |
| fragment_230.1175 | : 0.02 |
| fragment_104.0025 | : 0.01 |
| loss_79.0425      | : 0.01 |
| loss_84.0675      | : 0.01 |
| fragment_79.0075  | : 0.01 |
| fragment_68.0225  | : 0.01 |
| loss_109.0625     | : 0.01 |
| loss_126.1175     | : 0.01 |

gnps\_motif\_48.m2m

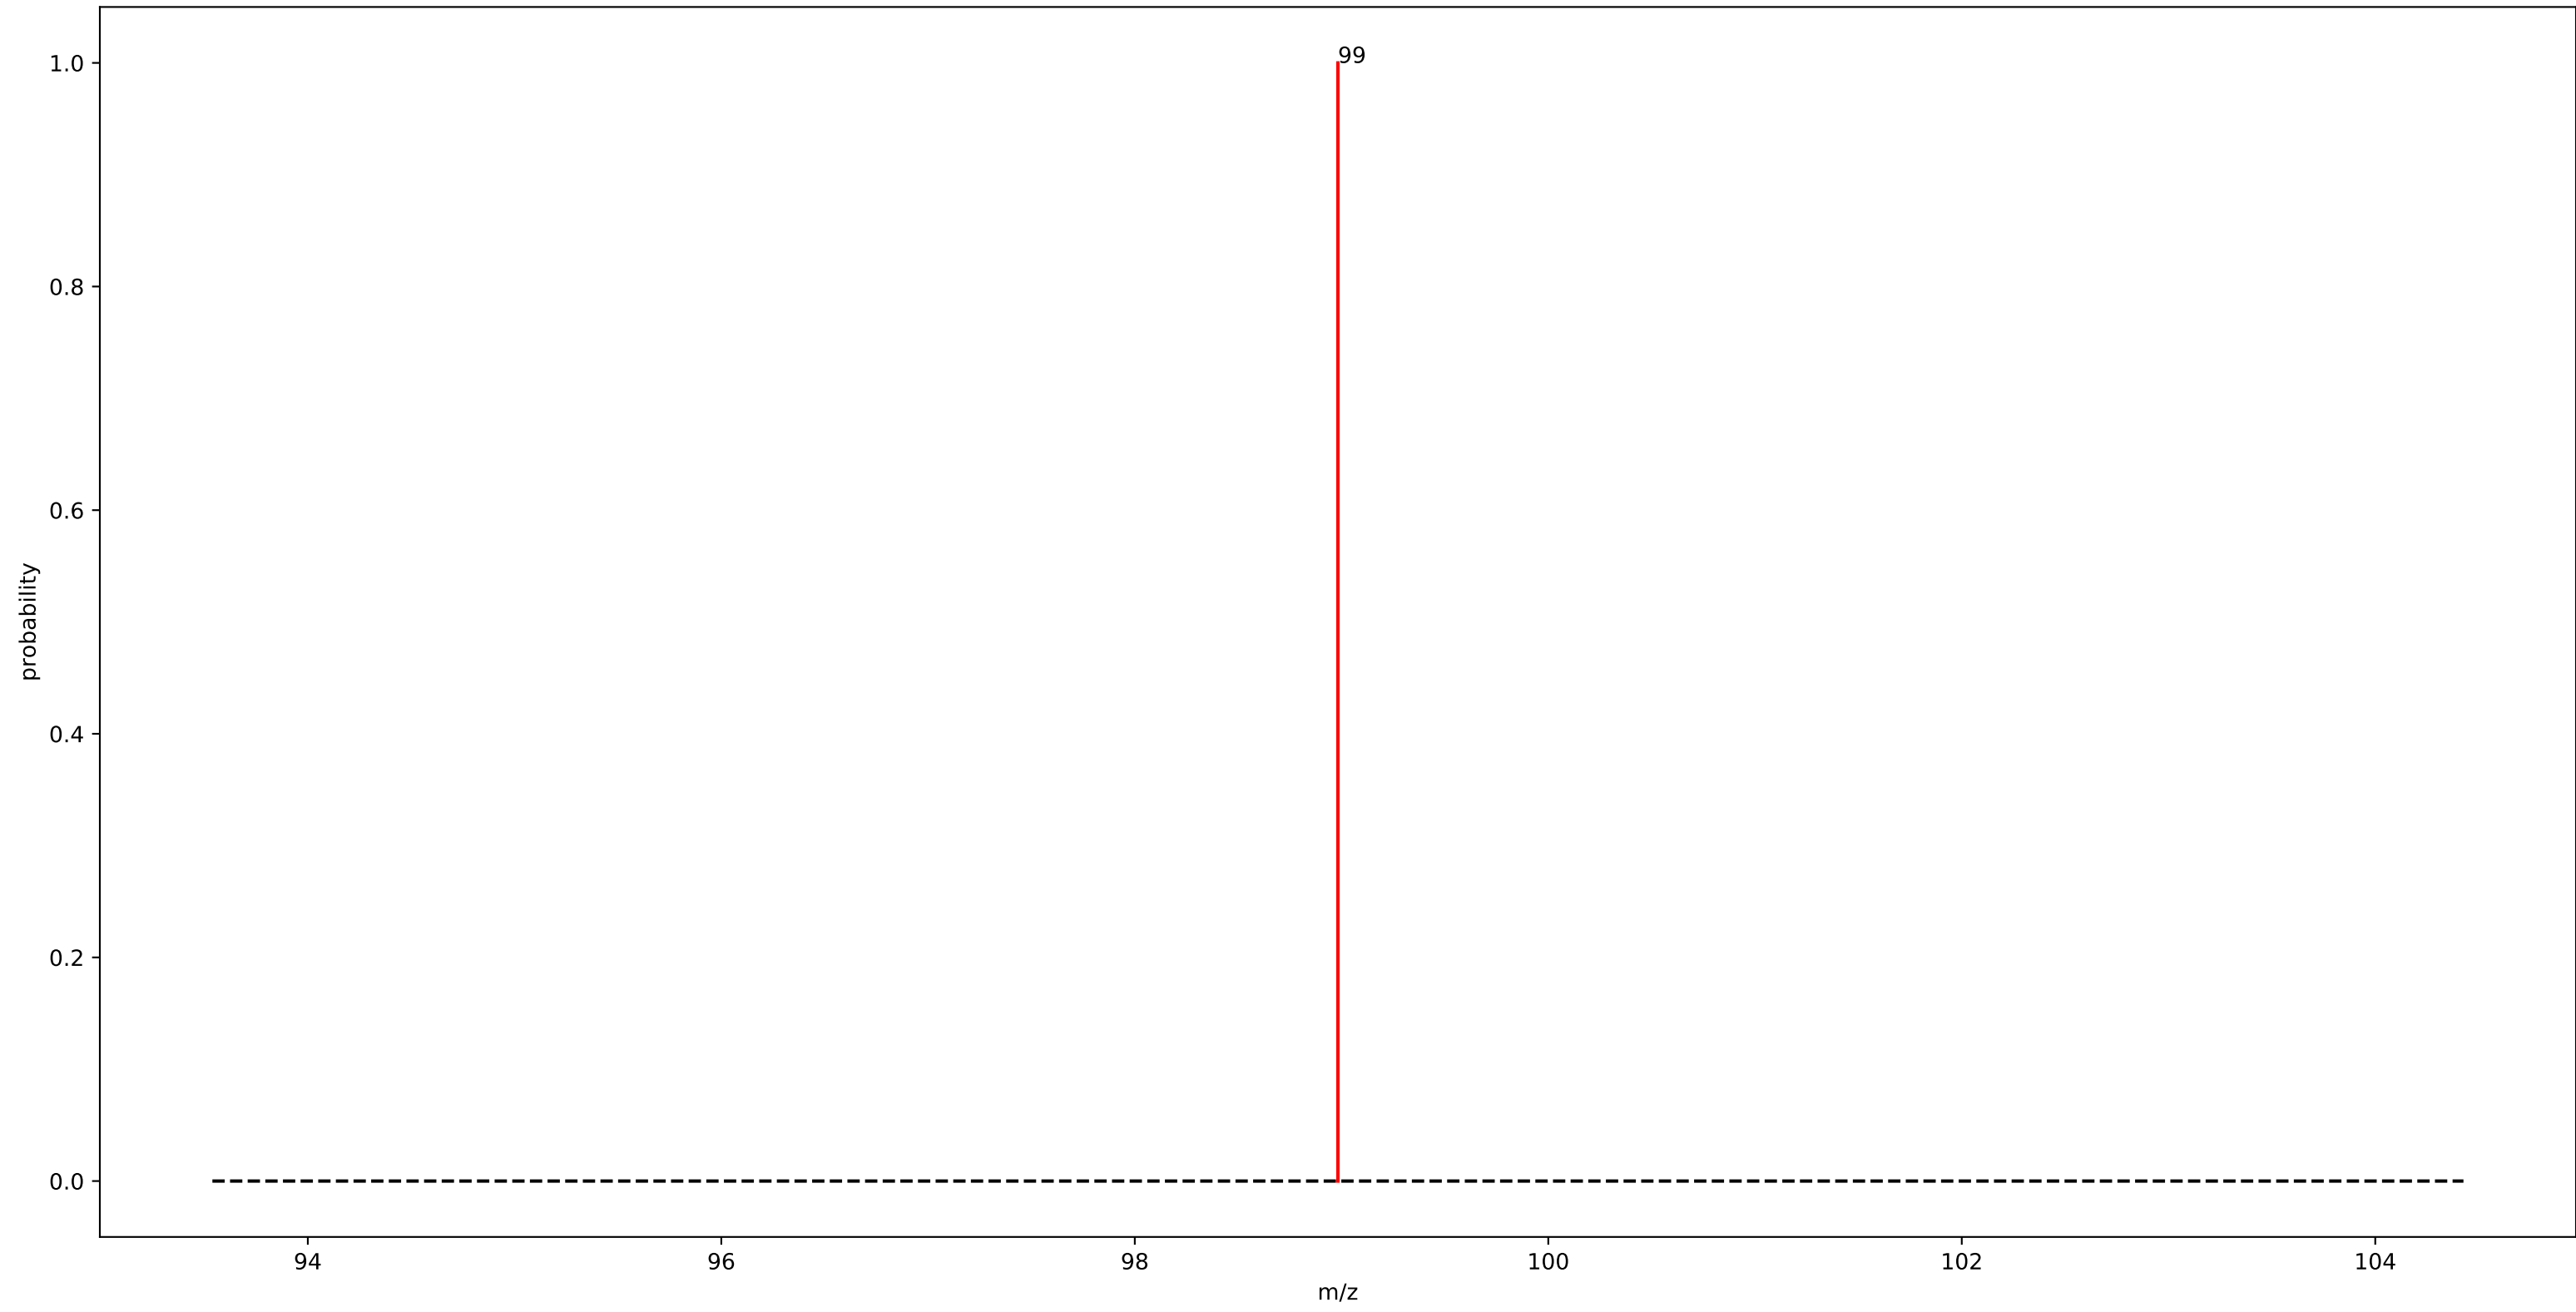

# gnps\_motif\_48.m2m

fragment\_98.9825 : 1.00



euphorbia\_motif\_119.m2m

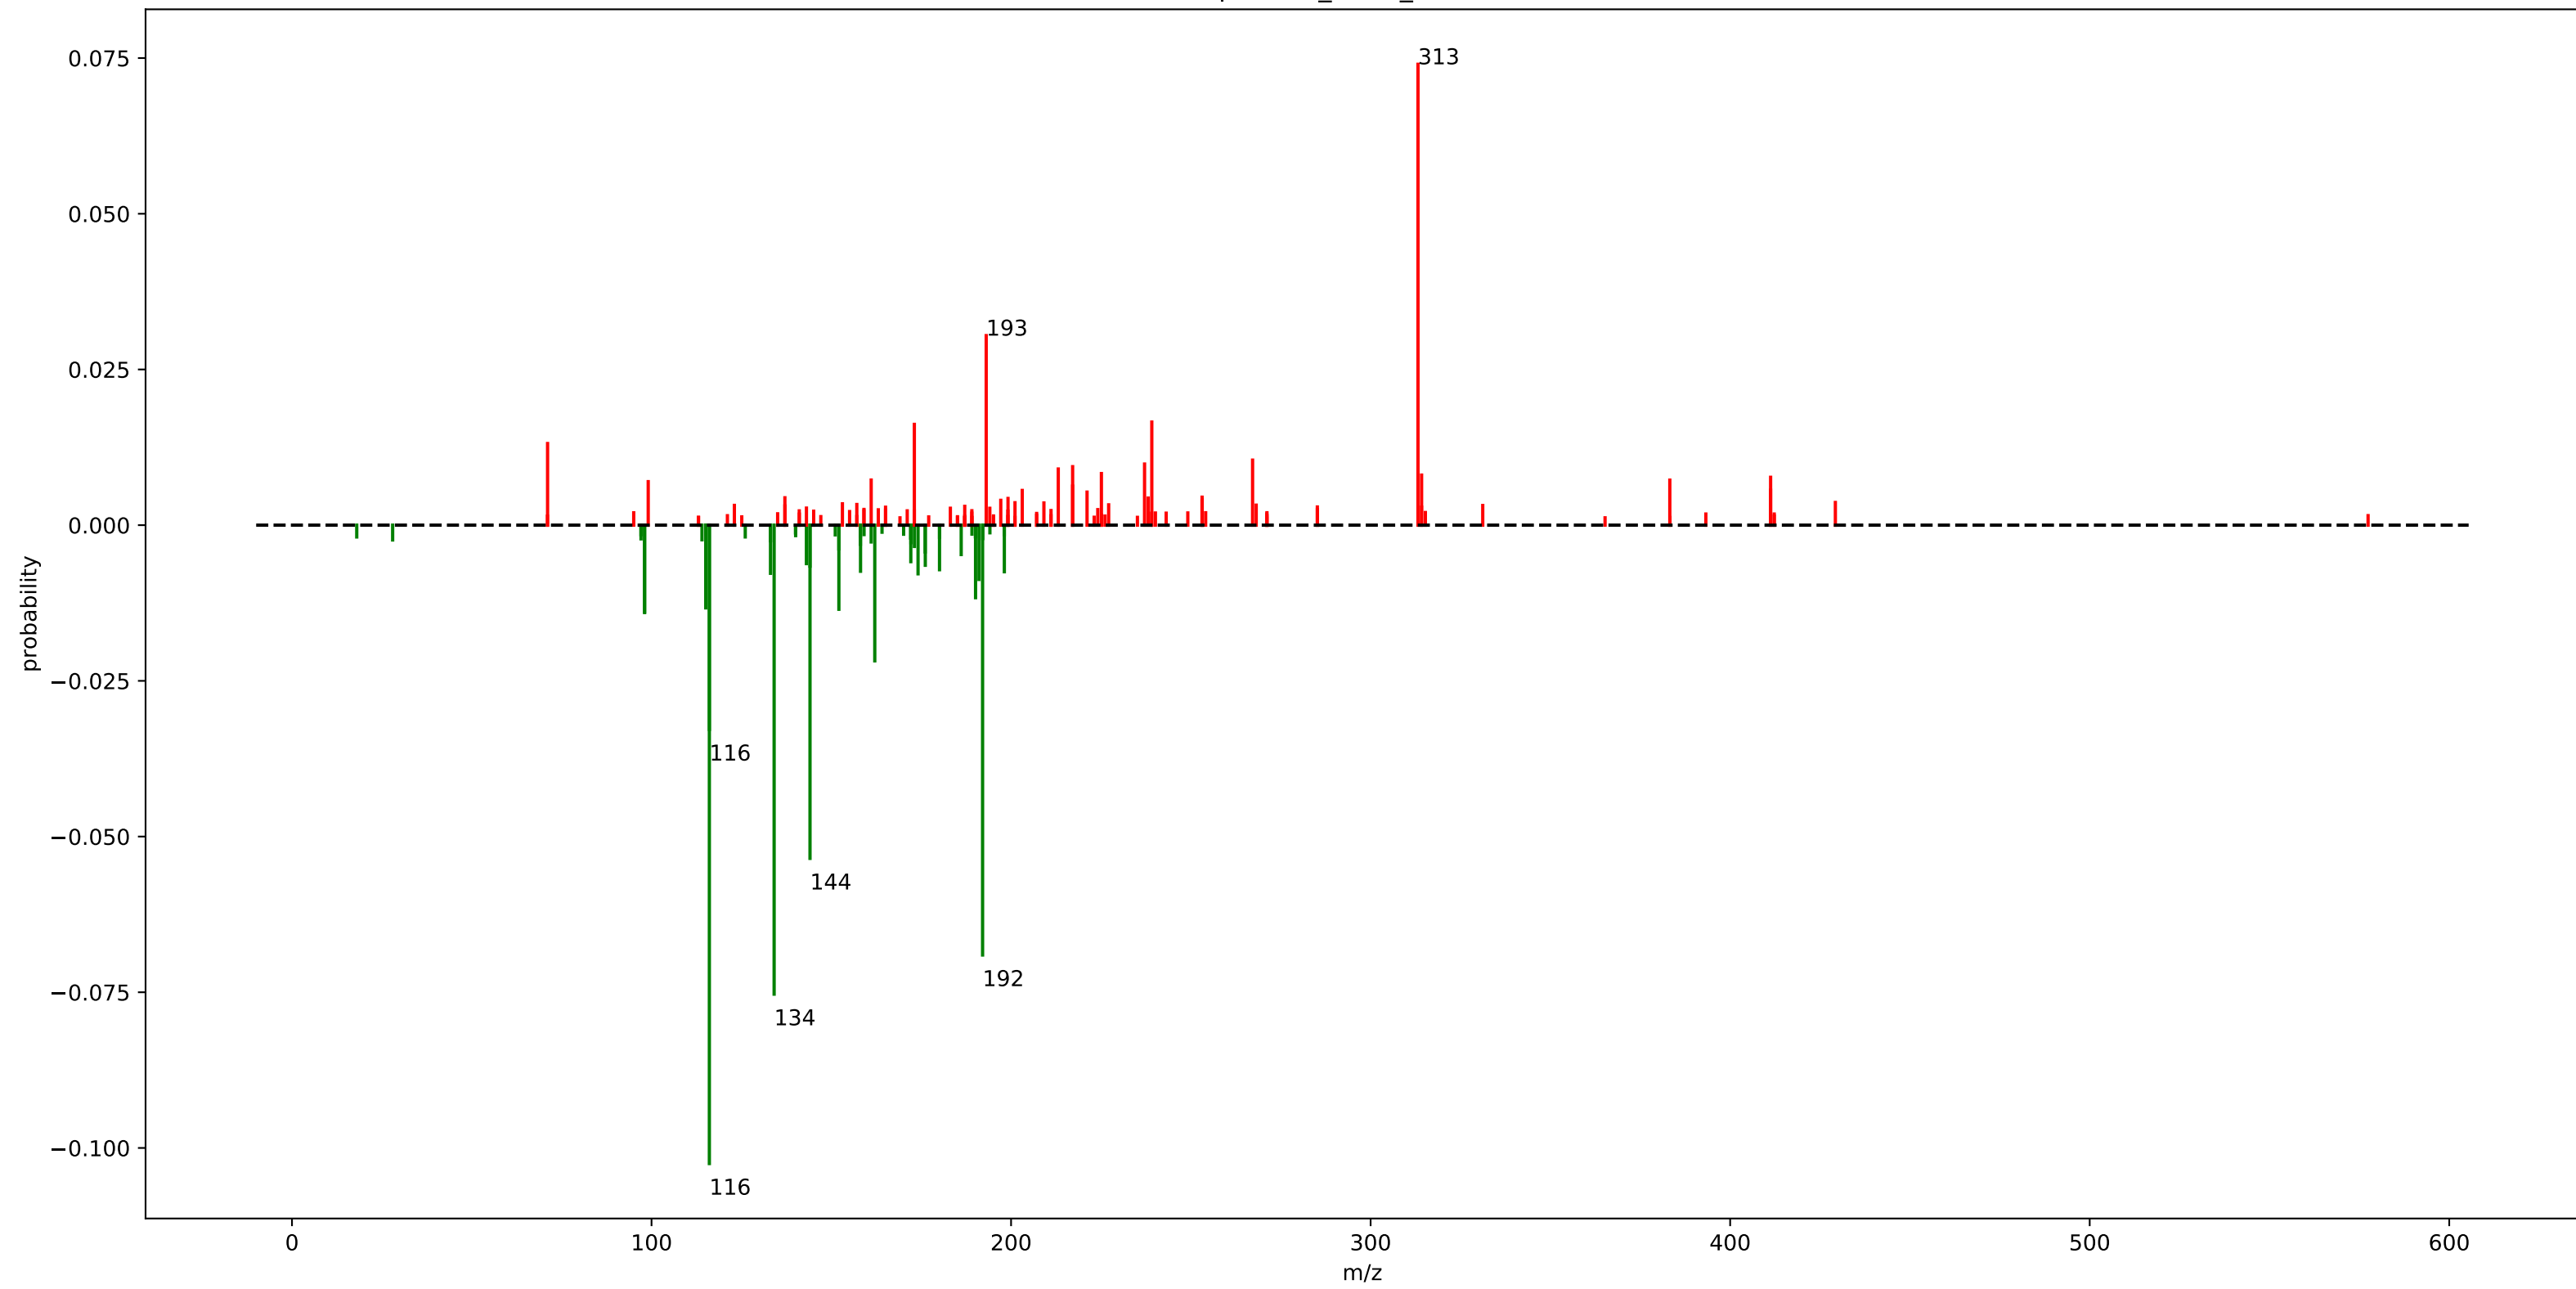

# euphorbia\_motif\_119.m2m

|                   |        |                   |        |
|-------------------|--------|-------------------|--------|
| loss_116.0825     | : 0.10 | loss_191.0775     | : 0.01 |
| loss_134.0975     | : 0.08 | fragment_225.1225 | : 0.01 |
| fragment_313.1775 | : 0.07 | fragment_314.1825 | : 0.01 |
| loss_192.0775     | : 0.07 | loss_174.1275     | : 0.01 |
| loss_144.0775     | : 0.05 | loss_133.0925     | : 0.01 |
| loss_116.0875     | : 0.03 | fragment_411.2525 | : 0.01 |
| fragment_193.0825 | : 0.03 | loss_198.1275     | : 0.01 |
| loss_162.0925     | : 0.02 | loss_158.1325     | : 0.01 |
| fragment_239.1425 | : 0.02 | fragment_161.0925 | : 0.01 |
| fragment_173.0975 | : 0.02 | fragment_383.2175 | : 0.01 |
| loss_98.0725      | : 0.01 | loss_180.0975     | : 0.01 |
| loss_98.0775      | : 0.01 | fragment_99.0775  | : 0.01 |
| loss_152.1075     | : 0.01 | loss_144.0825     | : 0.01 |
| loss_115.0825     | : 0.01 | loss_176.1425     | : 0.01 |
| fragment_71.0875  | : 0.01 | fragment_217.1175 | : 0.01 |
| loss_190.1225     | : 0.01 | loss_143.0775     | : 0.01 |
| fragment_267.1725 | : 0.01 | loss_172.1125     | : 0.01 |
| fragment_237.1275 | : 0.01 | fragment_411.2475 | : 0.01 |
| fragment_217.1225 | : 0.01 | fragment_203.1075 | : 0.01 |
| fragment_213.1275 | : 0.01 | fragment_221.1325 | : 0.01 |

motif\_406

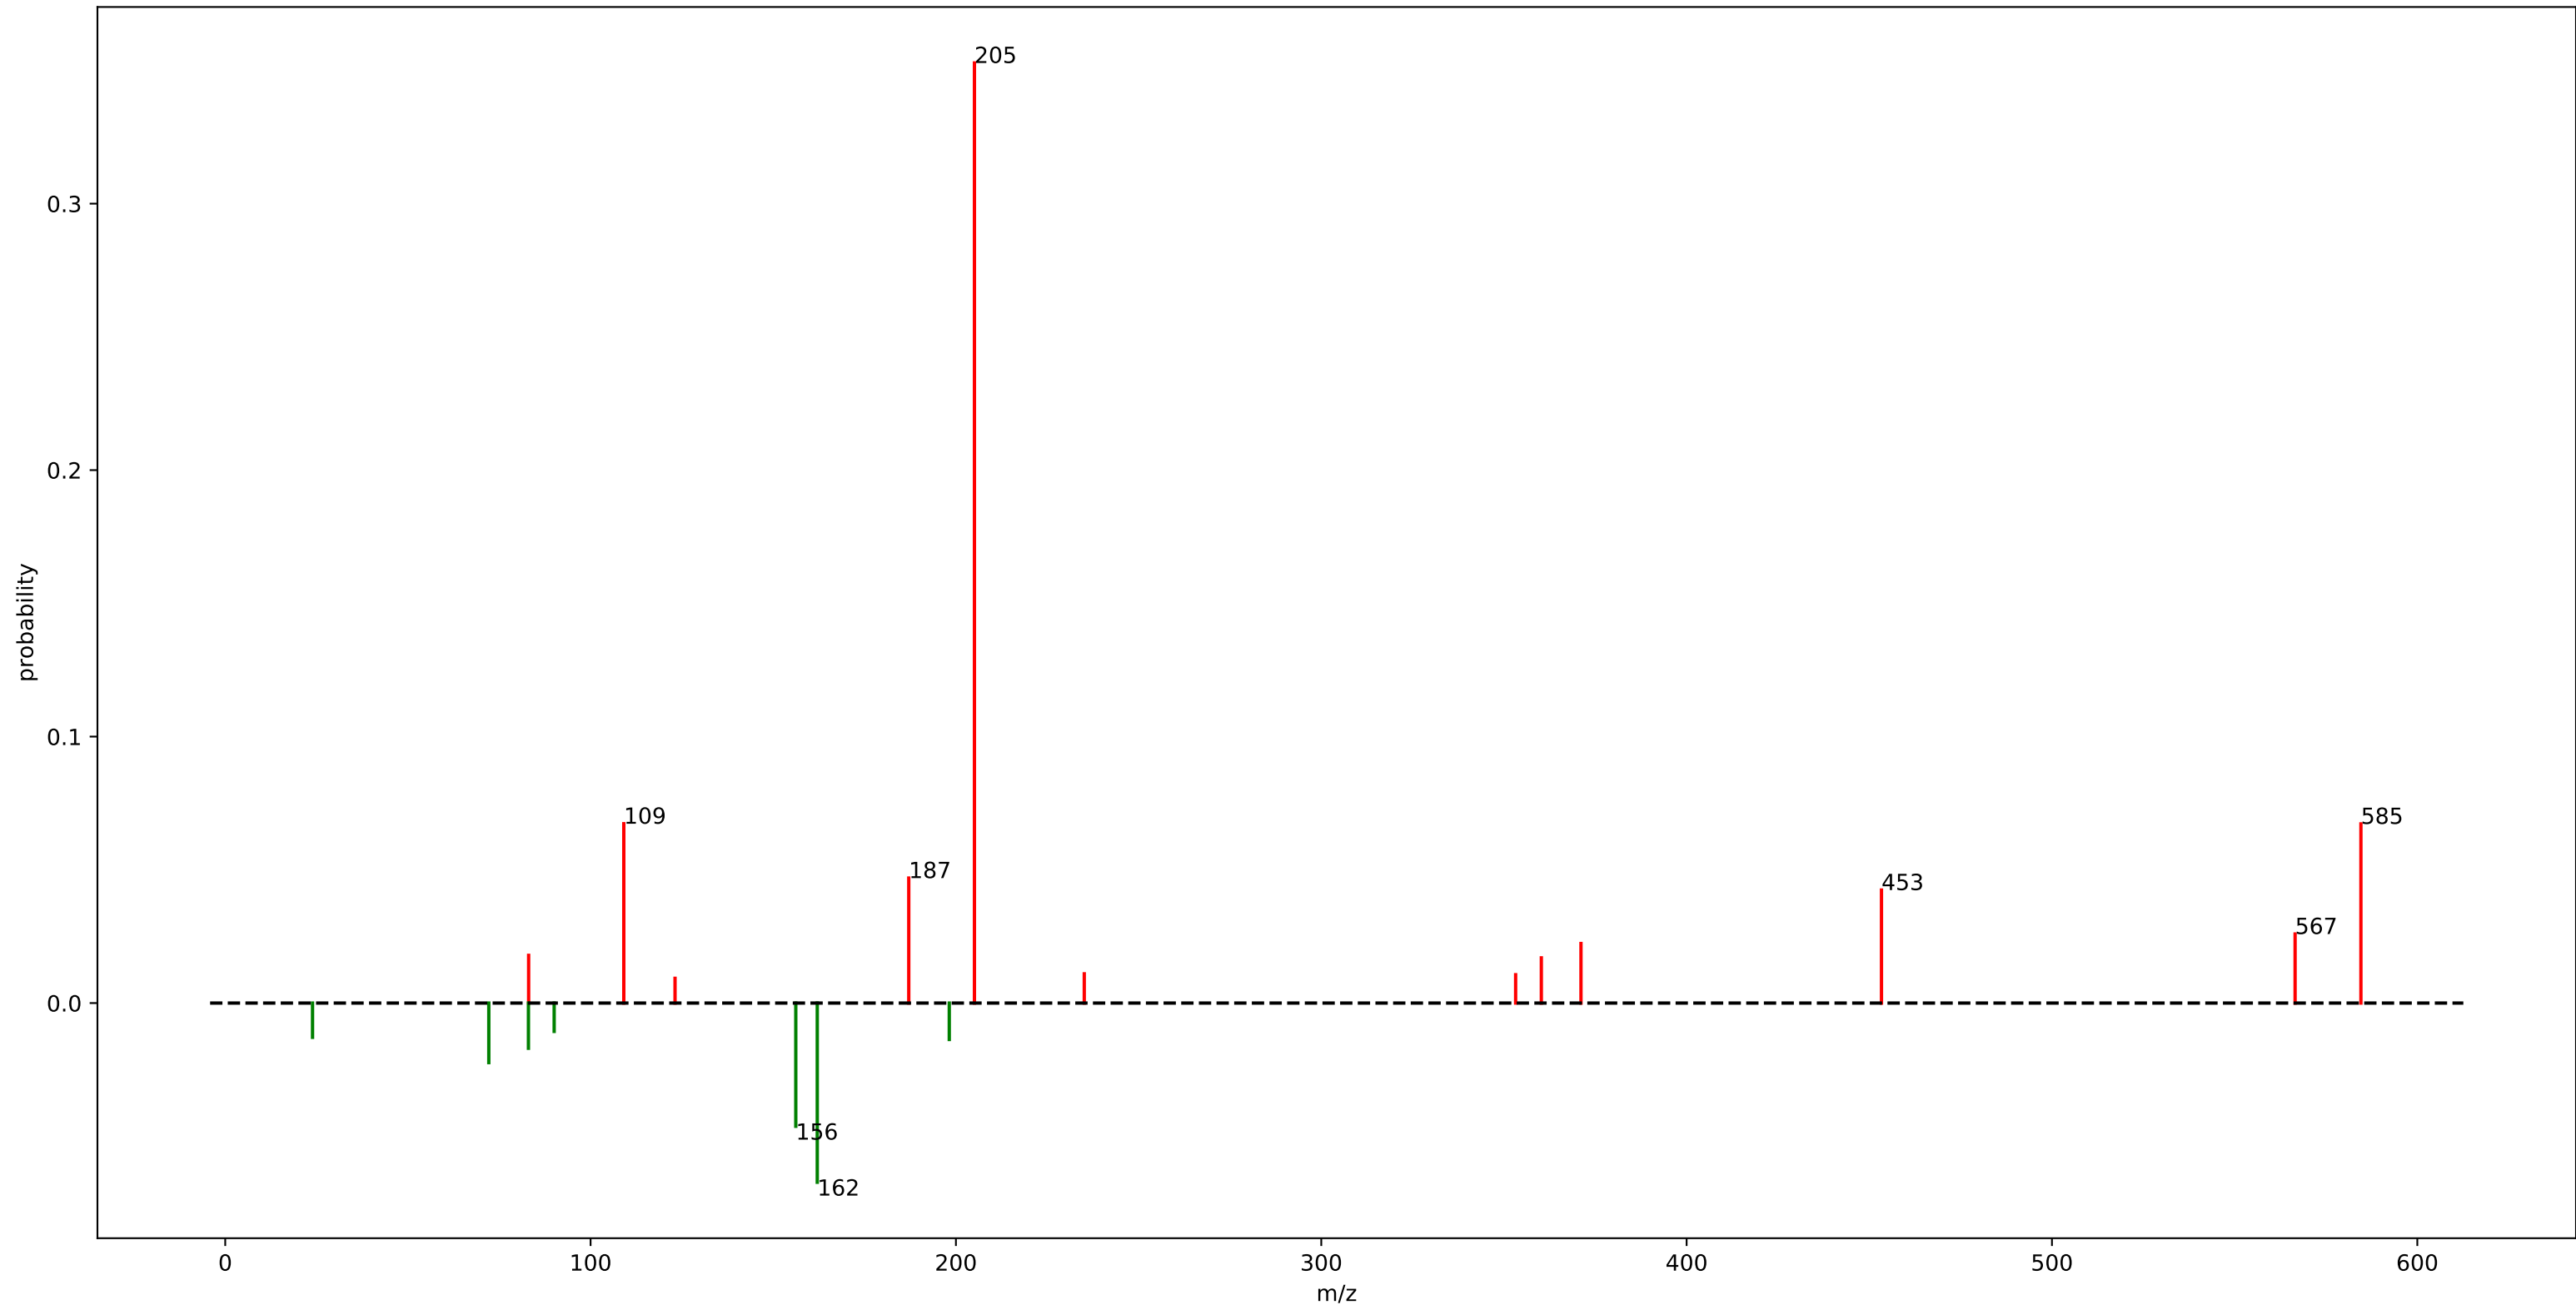

## motif\_406

|                   |        |
|-------------------|--------|
| fragment_205.0675 | : 0.35 |
| fragment_109.0925 | : 0.07 |
| loss_162.0475     | : 0.07 |
| fragment_584.5625 | : 0.07 |
| fragment_187.0925 | : 0.05 |
| loss_156.1675     | : 0.05 |
| fragment_453.3325 | : 0.04 |
| fragment_566.5475 | : 0.03 |
| loss_72.1425      | : 0.02 |
| fragment_371.0825 | : 0.02 |
| fragment_83.0475  | : 0.02 |
| fragment_360.2325 | : 0.02 |
| loss_82.9925      | : 0.02 |
| loss_198.1775     | : 0.01 |
| loss_23.8925      | : 0.01 |
| fragment_235.1275 | : 0.01 |
| loss_90.0325      | : 0.01 |
| fragment_353.1975 | : 0.01 |
| fragment_123.1175 | : 0.01 |

motif\_588

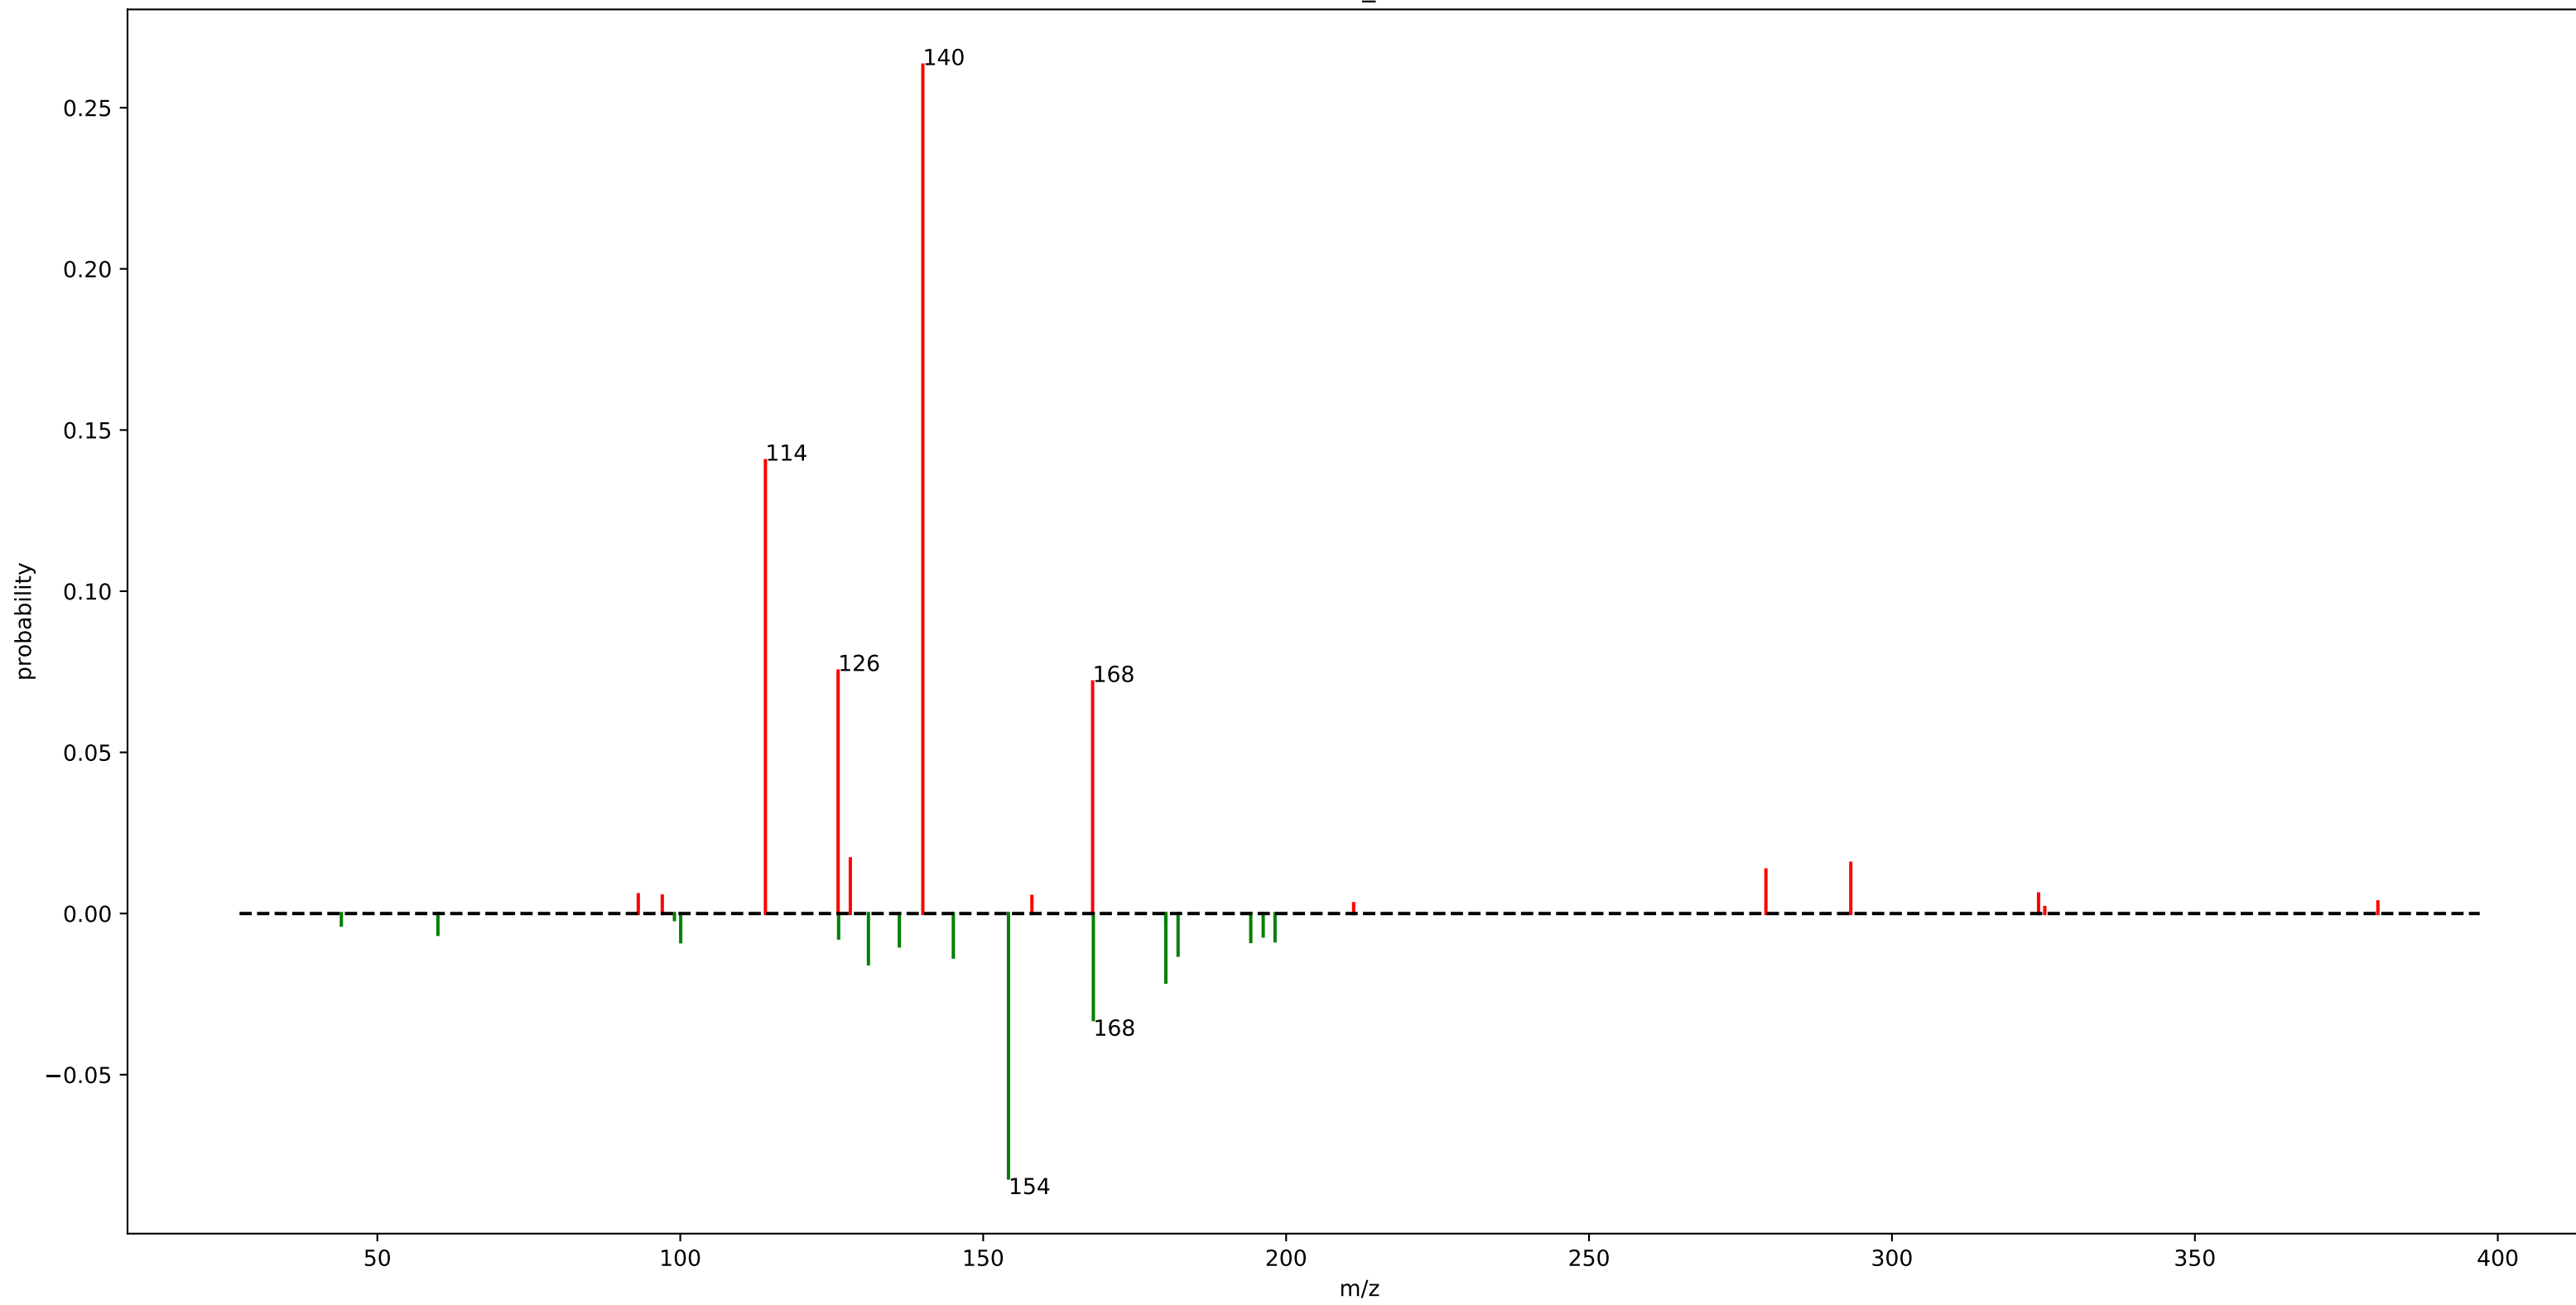

## motif\_588

|                   |        |                   |        |
|-------------------|--------|-------------------|--------|
| fragment_140.0375 | : 0.26 | fragment_324.1975 | : 0.01 |
| fragment_114.0525 | : 0.14 | fragment_93.0675  | : 0.01 |
| loss_154.1725     | : 0.08 | fragment_97.0275  | : 0.01 |
| fragment_126.0525 | : 0.08 | fragment_158.0425 | : 0.01 |
| fragment_168.0625 | : 0.07 |                   |        |
| loss_168.1825     | : 0.03 |                   |        |
| loss_180.1475     | : 0.02 |                   |        |
| fragment_128.0675 | : 0.02 |                   |        |
| fragment_293.2075 | : 0.02 |                   |        |
| loss_131.0575     | : 0.02 |                   |        |
| loss_145.0725     | : 0.01 |                   |        |
| fragment_279.1925 | : 0.01 |                   |        |
| loss_182.1675     | : 0.01 |                   |        |
| loss_136.1625     | : 0.01 |                   |        |
| loss_100.0725     | : 0.01 |                   |        |
| loss_194.1675     | : 0.01 |                   |        |
| loss_198.1725     | : 0.01 |                   |        |
| loss_126.1375     | : 0.01 |                   |        |
| loss_196.2175     | : 0.01 |                   |        |
| loss_59.9975      | : 0.01 |                   |        |

motif\_589

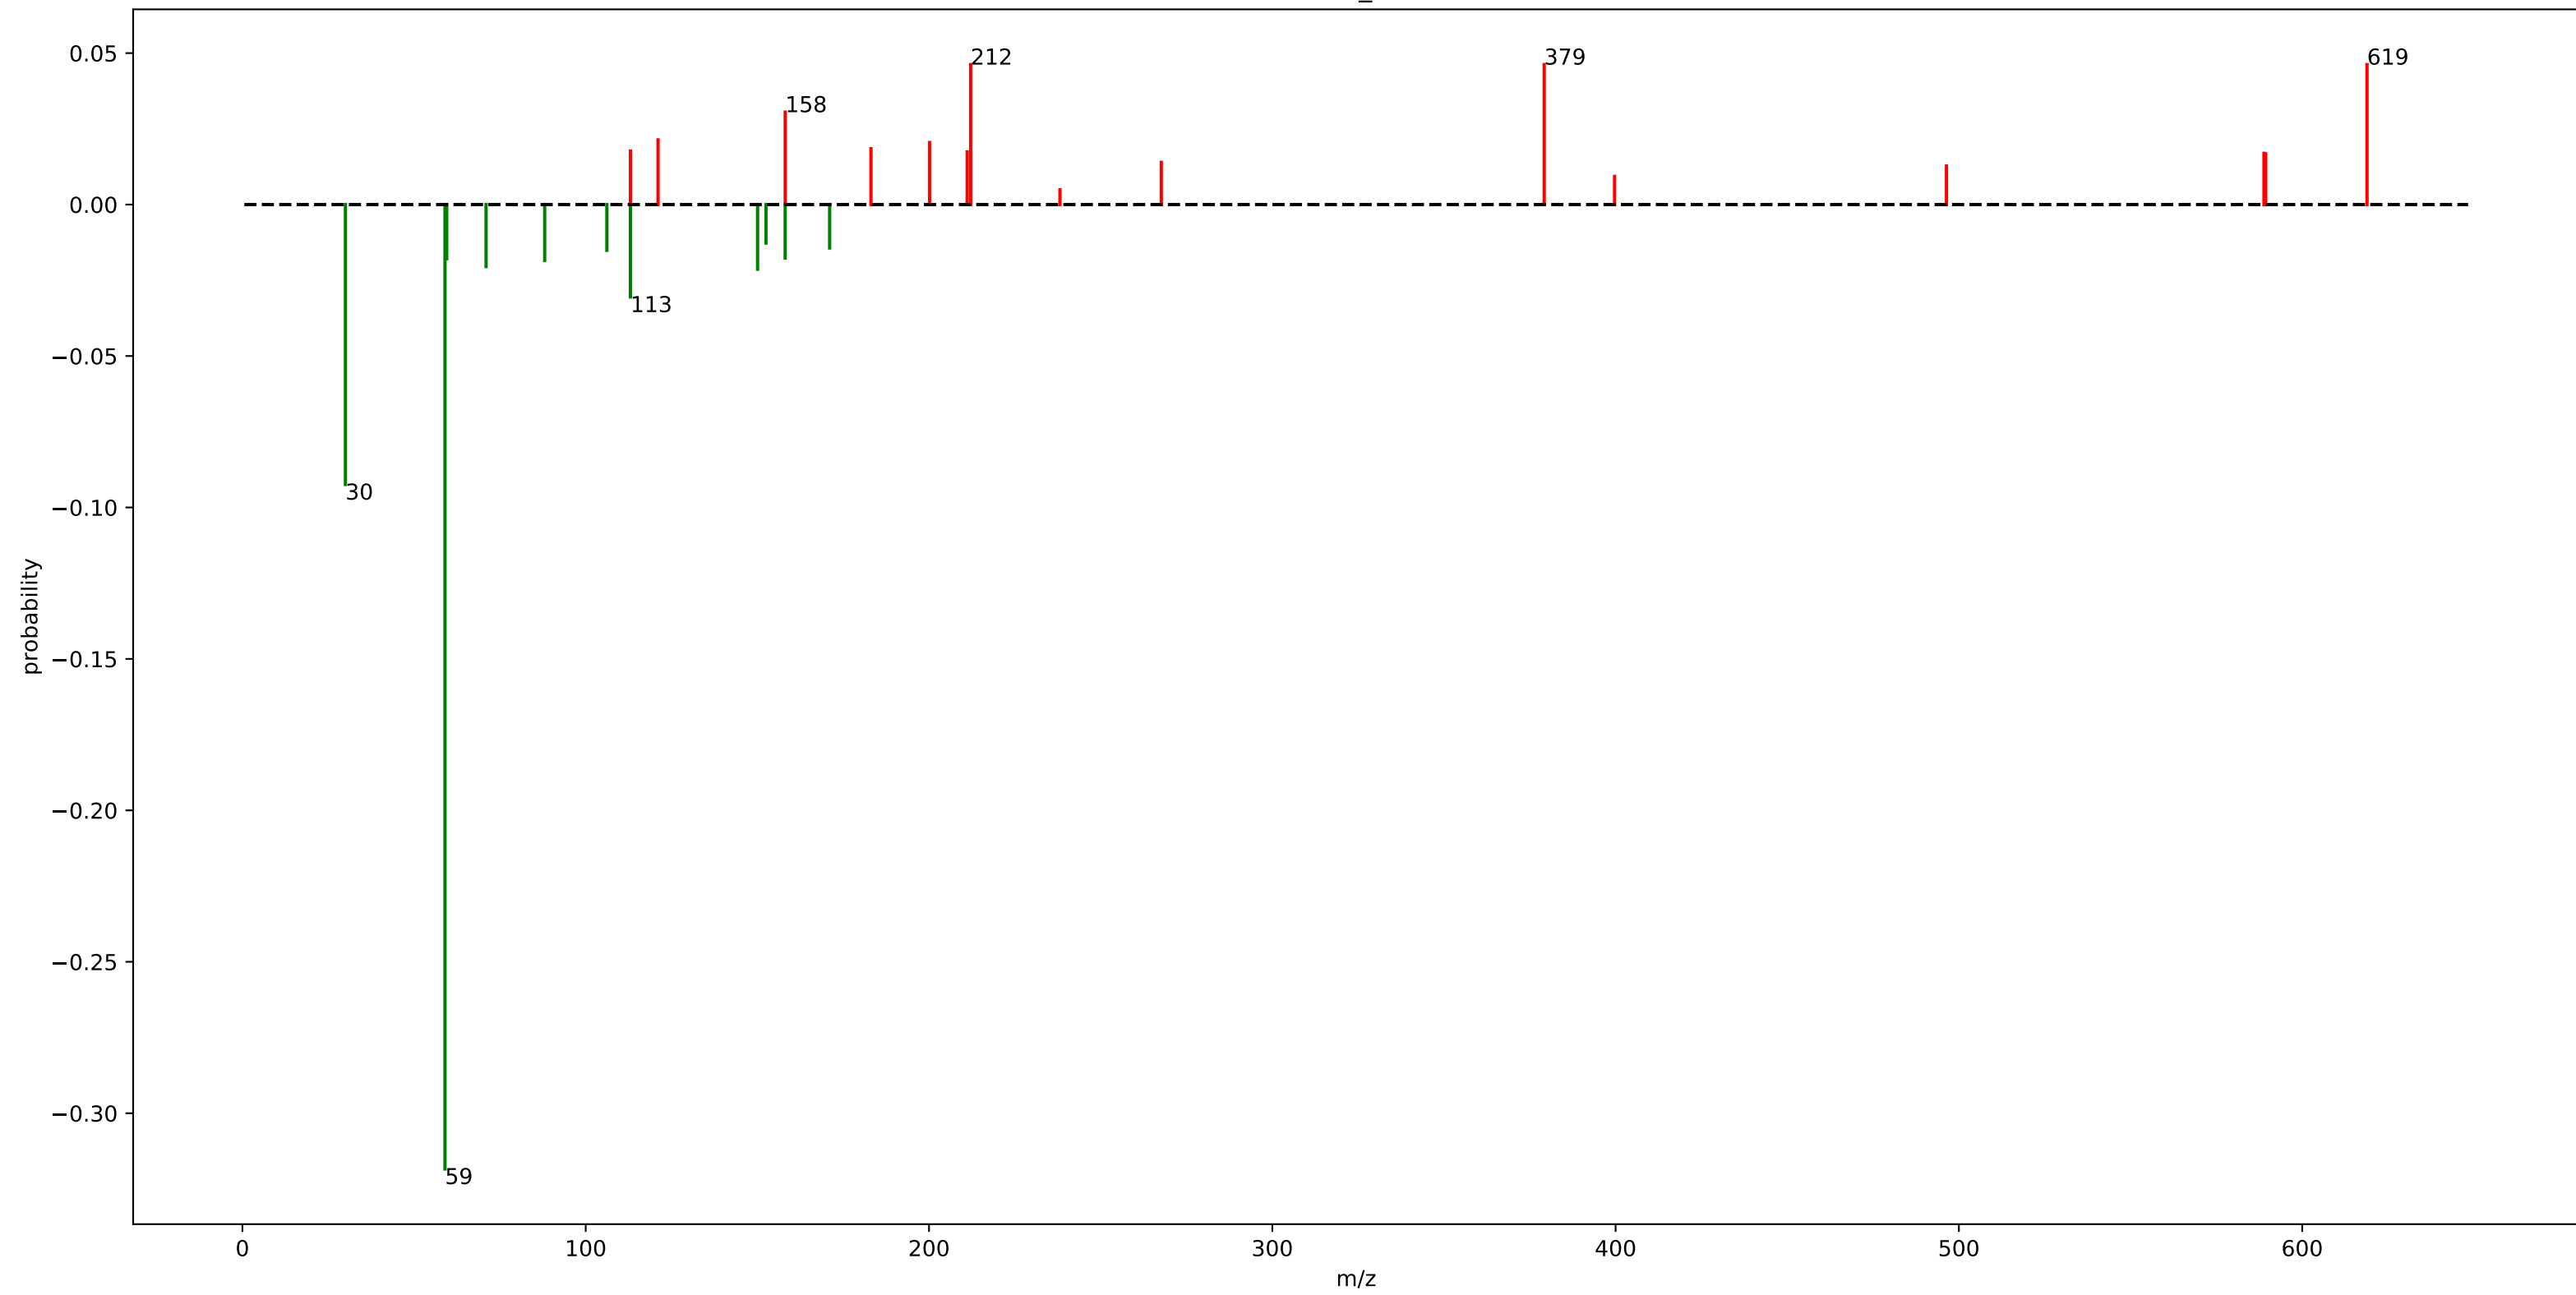

## motif\_589

|                   |        |                   |        |
|-------------------|--------|-------------------|--------|
| loss_59.0125      | : 0.32 | loss_171.0575     | : 0.01 |
| loss_30.0075      | : 0.09 | fragment_267.6625 | : 0.01 |
| fragment_212.1325 | : 0.05 | loss_152.5125     | : 0.01 |
| fragment_379.1975 | : 0.05 | fragment_496.3775 | : 0.01 |
| fragment_618.8825 | : 0.05 | fragment_399.7075 | : 0.01 |
| loss_113.0225     | : 0.03 |                   |        |
| fragment_158.1175 | : 0.03 |                   |        |
| loss_150.0675     | : 0.02 |                   |        |
| fragment_121.0725 | : 0.02 |                   |        |
| fragment_200.1625 | : 0.02 |                   |        |
| loss_70.9775      | : 0.02 |                   |        |
| fragment_183.0925 | : 0.02 |                   |        |
| loss_88.0525      | : 0.02 |                   |        |
| loss_59.5175      | : 0.02 |                   |        |
| fragment_113.0325 | : 0.02 |                   |        |
| loss_158.1075     | : 0.02 |                   |        |
| fragment_211.1225 | : 0.02 |                   |        |
| fragment_588.8725 | : 0.02 |                   |        |
| fragment_589.3725 | : 0.02 |                   |        |
| loss_106.1675     | : 0.02 |                   |        |



StrepSalini\_motif\_113.m2m

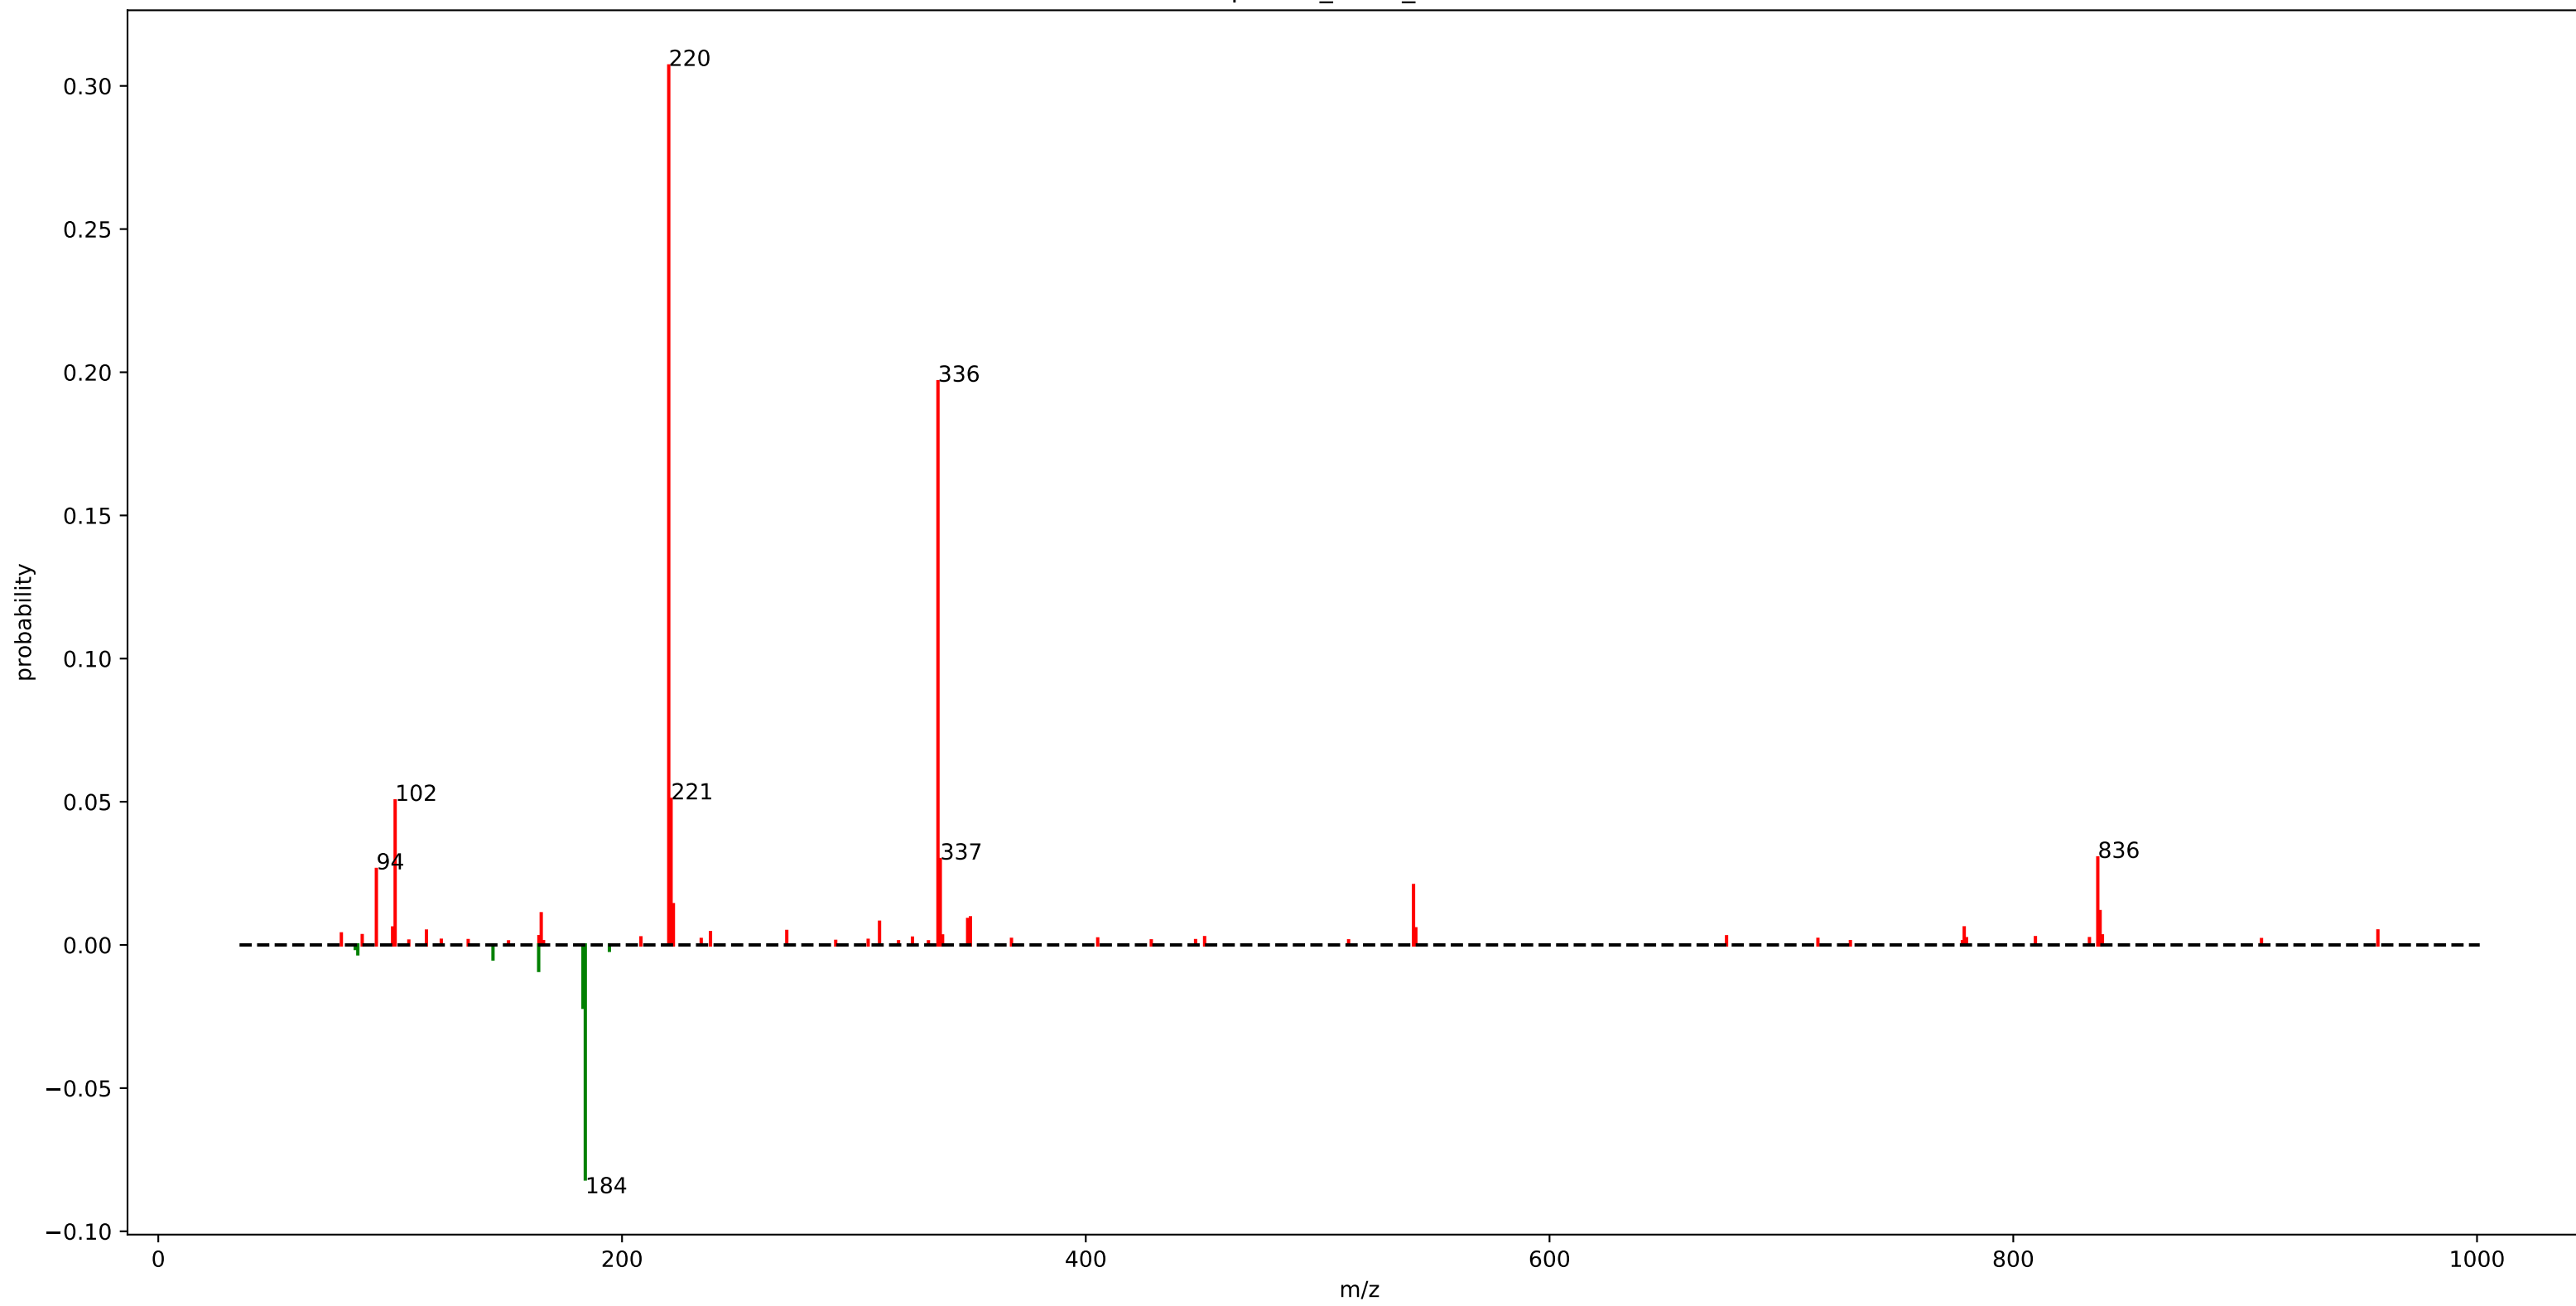

## StrepSalini\_motif\_113.m2m

|                   |        |
|-------------------|--------|
| fragment_220.1500 | : 0.31 |
| fragment_336.2525 | : 0.20 |
| loss_184.1525     | : 0.08 |
| fragment_221.1500 | : 0.05 |
| fragment_102.1500 | : 0.05 |
| fragment_836.4500 | : 0.03 |
| fragment_337.2525 | : 0.03 |
| fragment_94.0500  | : 0.03 |
| loss_183.1525     | : 0.02 |
| fragment_541.3500 | : 0.02 |
| fragment_222.1500 | : 0.01 |
| fragment_837.4500 | : 0.01 |
| fragment_165.1500 | : 0.01 |
| fragment_350.2525 | : 0.01 |
| loss_164.0500     | : 0.01 |
| fragment_349.0500 | : 0.01 |
| fragment_311.0500 | : 0.01 |
| fragment_778.8500 | : 0.01 |
| fragment_101.0500 | : 0.01 |
| fragment_542.3500 | : 0.01 |

euphorbia\_motif\_179.m2m

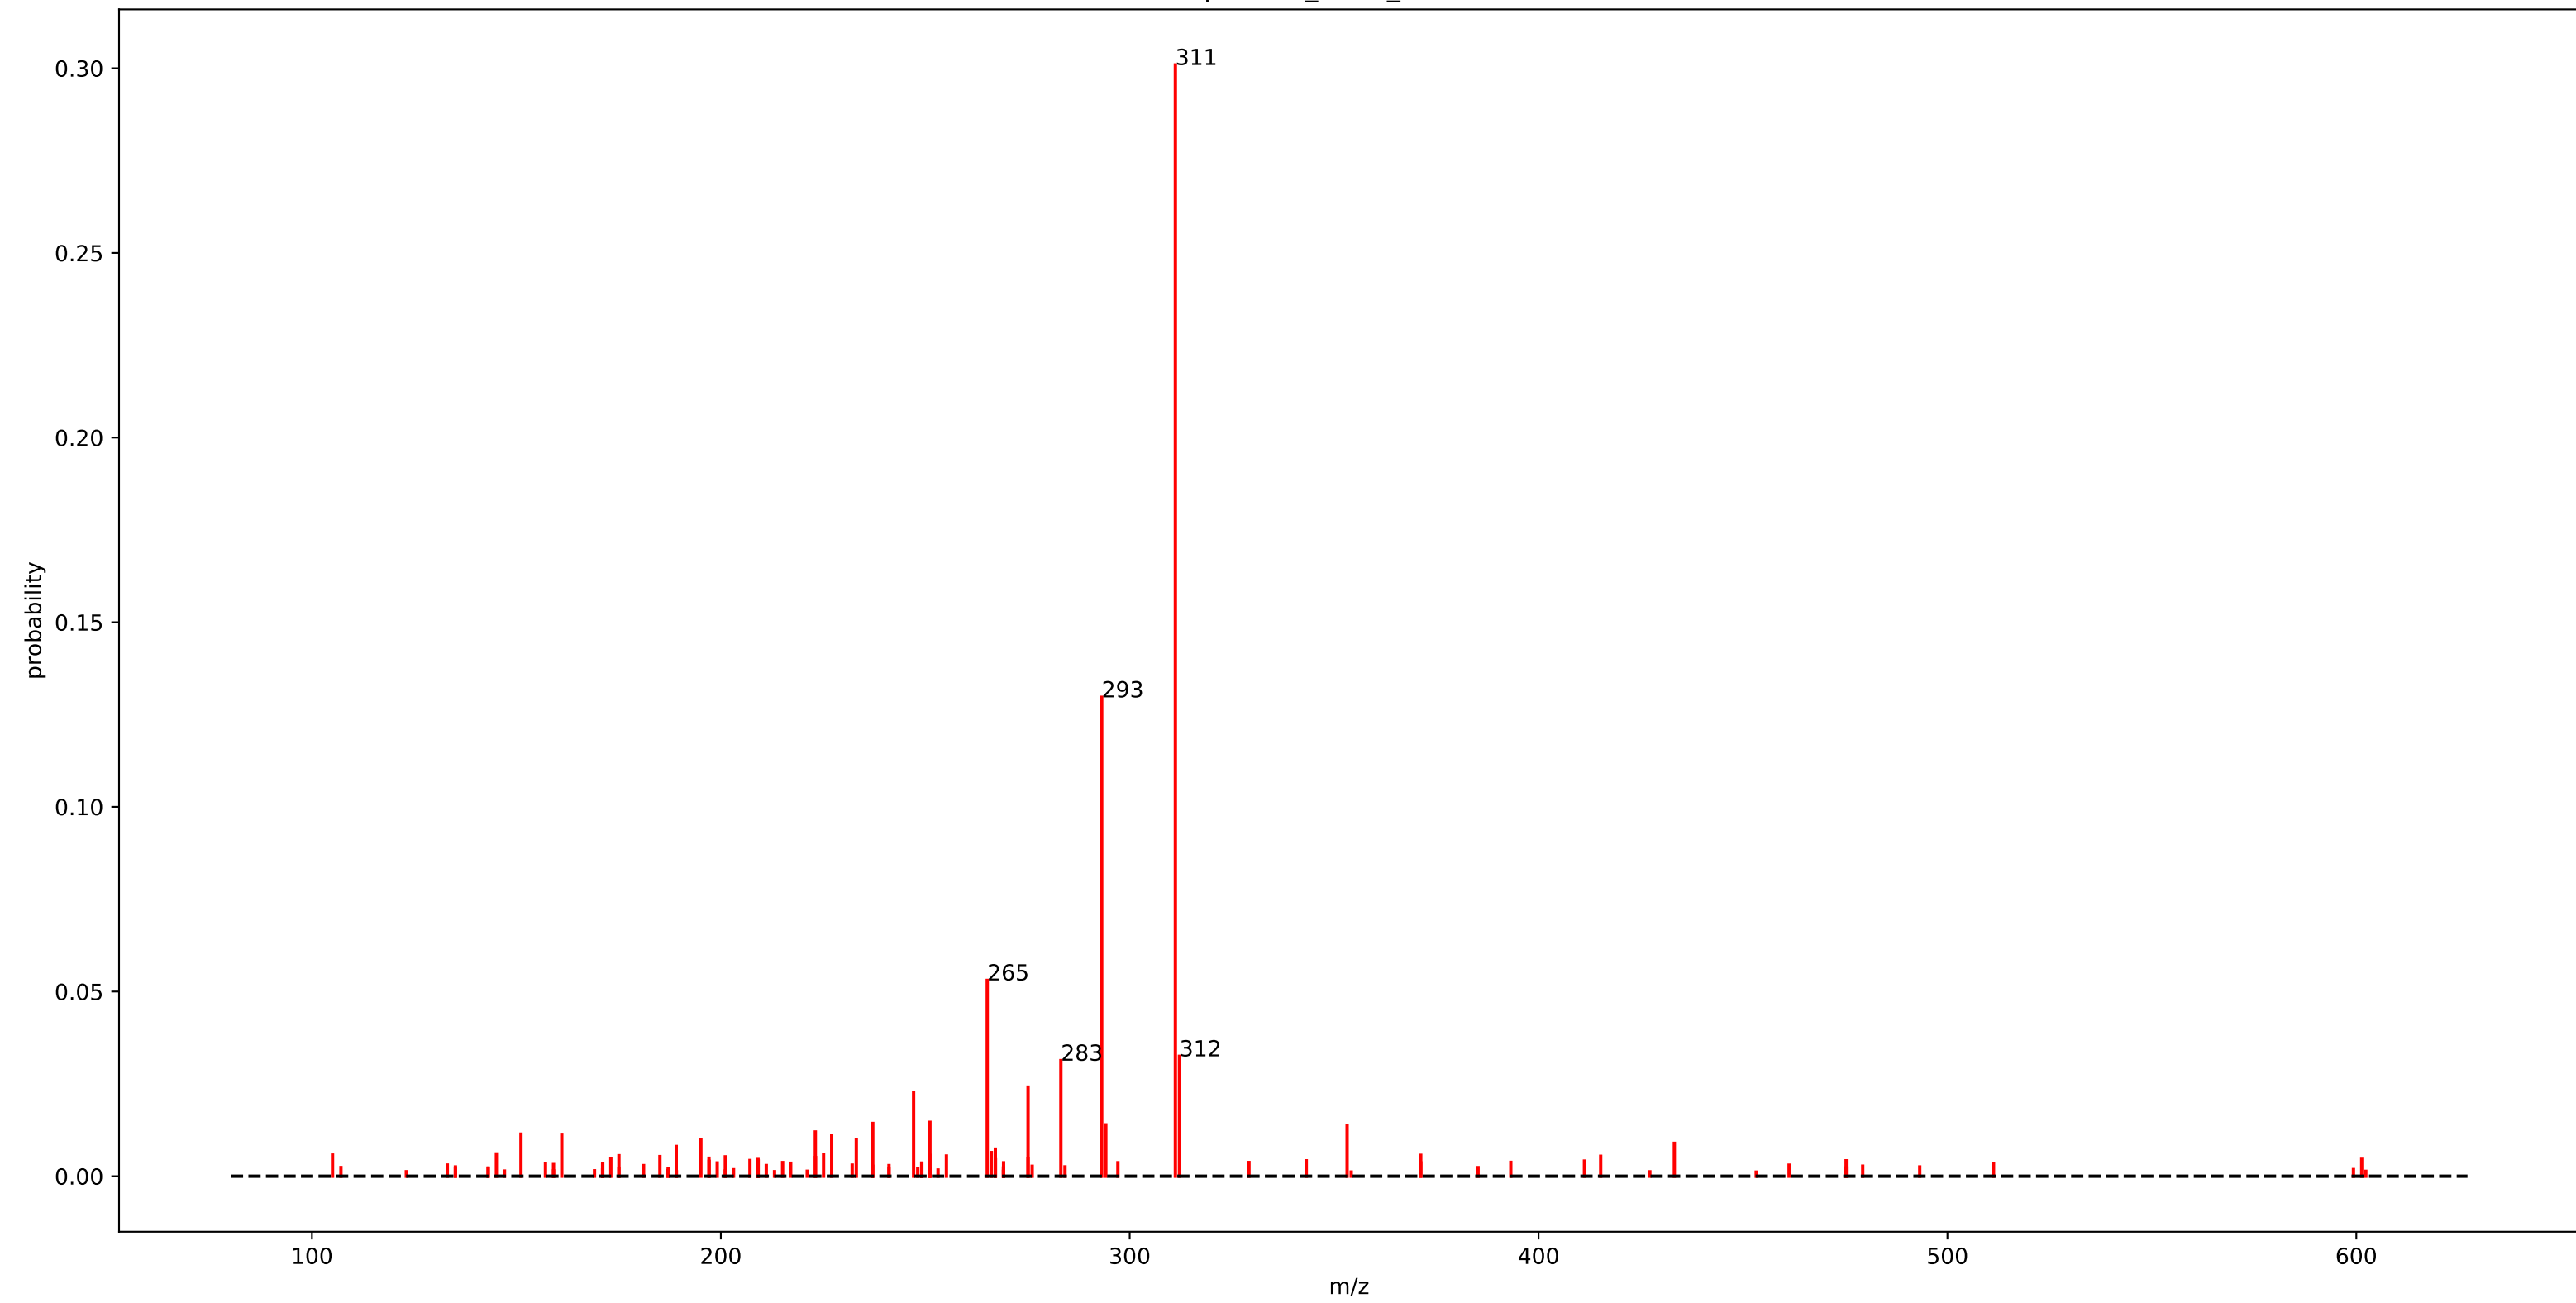

# euphorbia\_motif\_179.m2m

|                   |        |                   |        |
|-------------------|--------|-------------------|--------|
| fragment_311.1675 | : 0.30 | fragment_266.1625 | : 0.01 |
| fragment_293.1525 | : 0.13 | fragment_145.1025 | : 0.01 |
| fragment_265.1575 | : 0.05 | fragment_225.1275 | : 0.01 |
| fragment_312.1675 | : 0.03 | fragment_105.0325 | : 0.01 |
| fragment_283.1675 | : 0.03 | fragment_371.1825 | : 0.01 |
| fragment_275.1425 | : 0.02 | fragment_251.1075 | : 0.01 |
| fragment_247.1475 | : 0.02 | fragment_175.0775 | : 0.01 |
| fragment_251.1425 | : 0.01 | fragment_255.1725 | : 0.01 |
| fragment_237.1625 | : 0.01 | fragment_415.1925 | : 0.01 |
| fragment_294.1575 | : 0.01 | fragment_185.0975 | : 0.01 |
| fragment_353.1725 | : 0.01 | fragment_201.0925 | : 0.01 |
| fragment_223.1125 | : 0.01 | fragment_223.1475 | : 0.01 |
| fragment_151.1125 | : 0.01 |                   |        |
| fragment_161.0975 | : 0.01 |                   |        |
| fragment_227.1075 | : 0.01 |                   |        |
| fragment_195.1175 | : 0.01 |                   |        |
| fragment_233.1325 | : 0.01 |                   |        |
| fragment_433.2025 | : 0.01 |                   |        |
| fragment_189.0925 | : 0.01 |                   |        |
| fragment_267.1375 | : 0.01 |                   |        |

urine\_mass2motif\_120.m2m

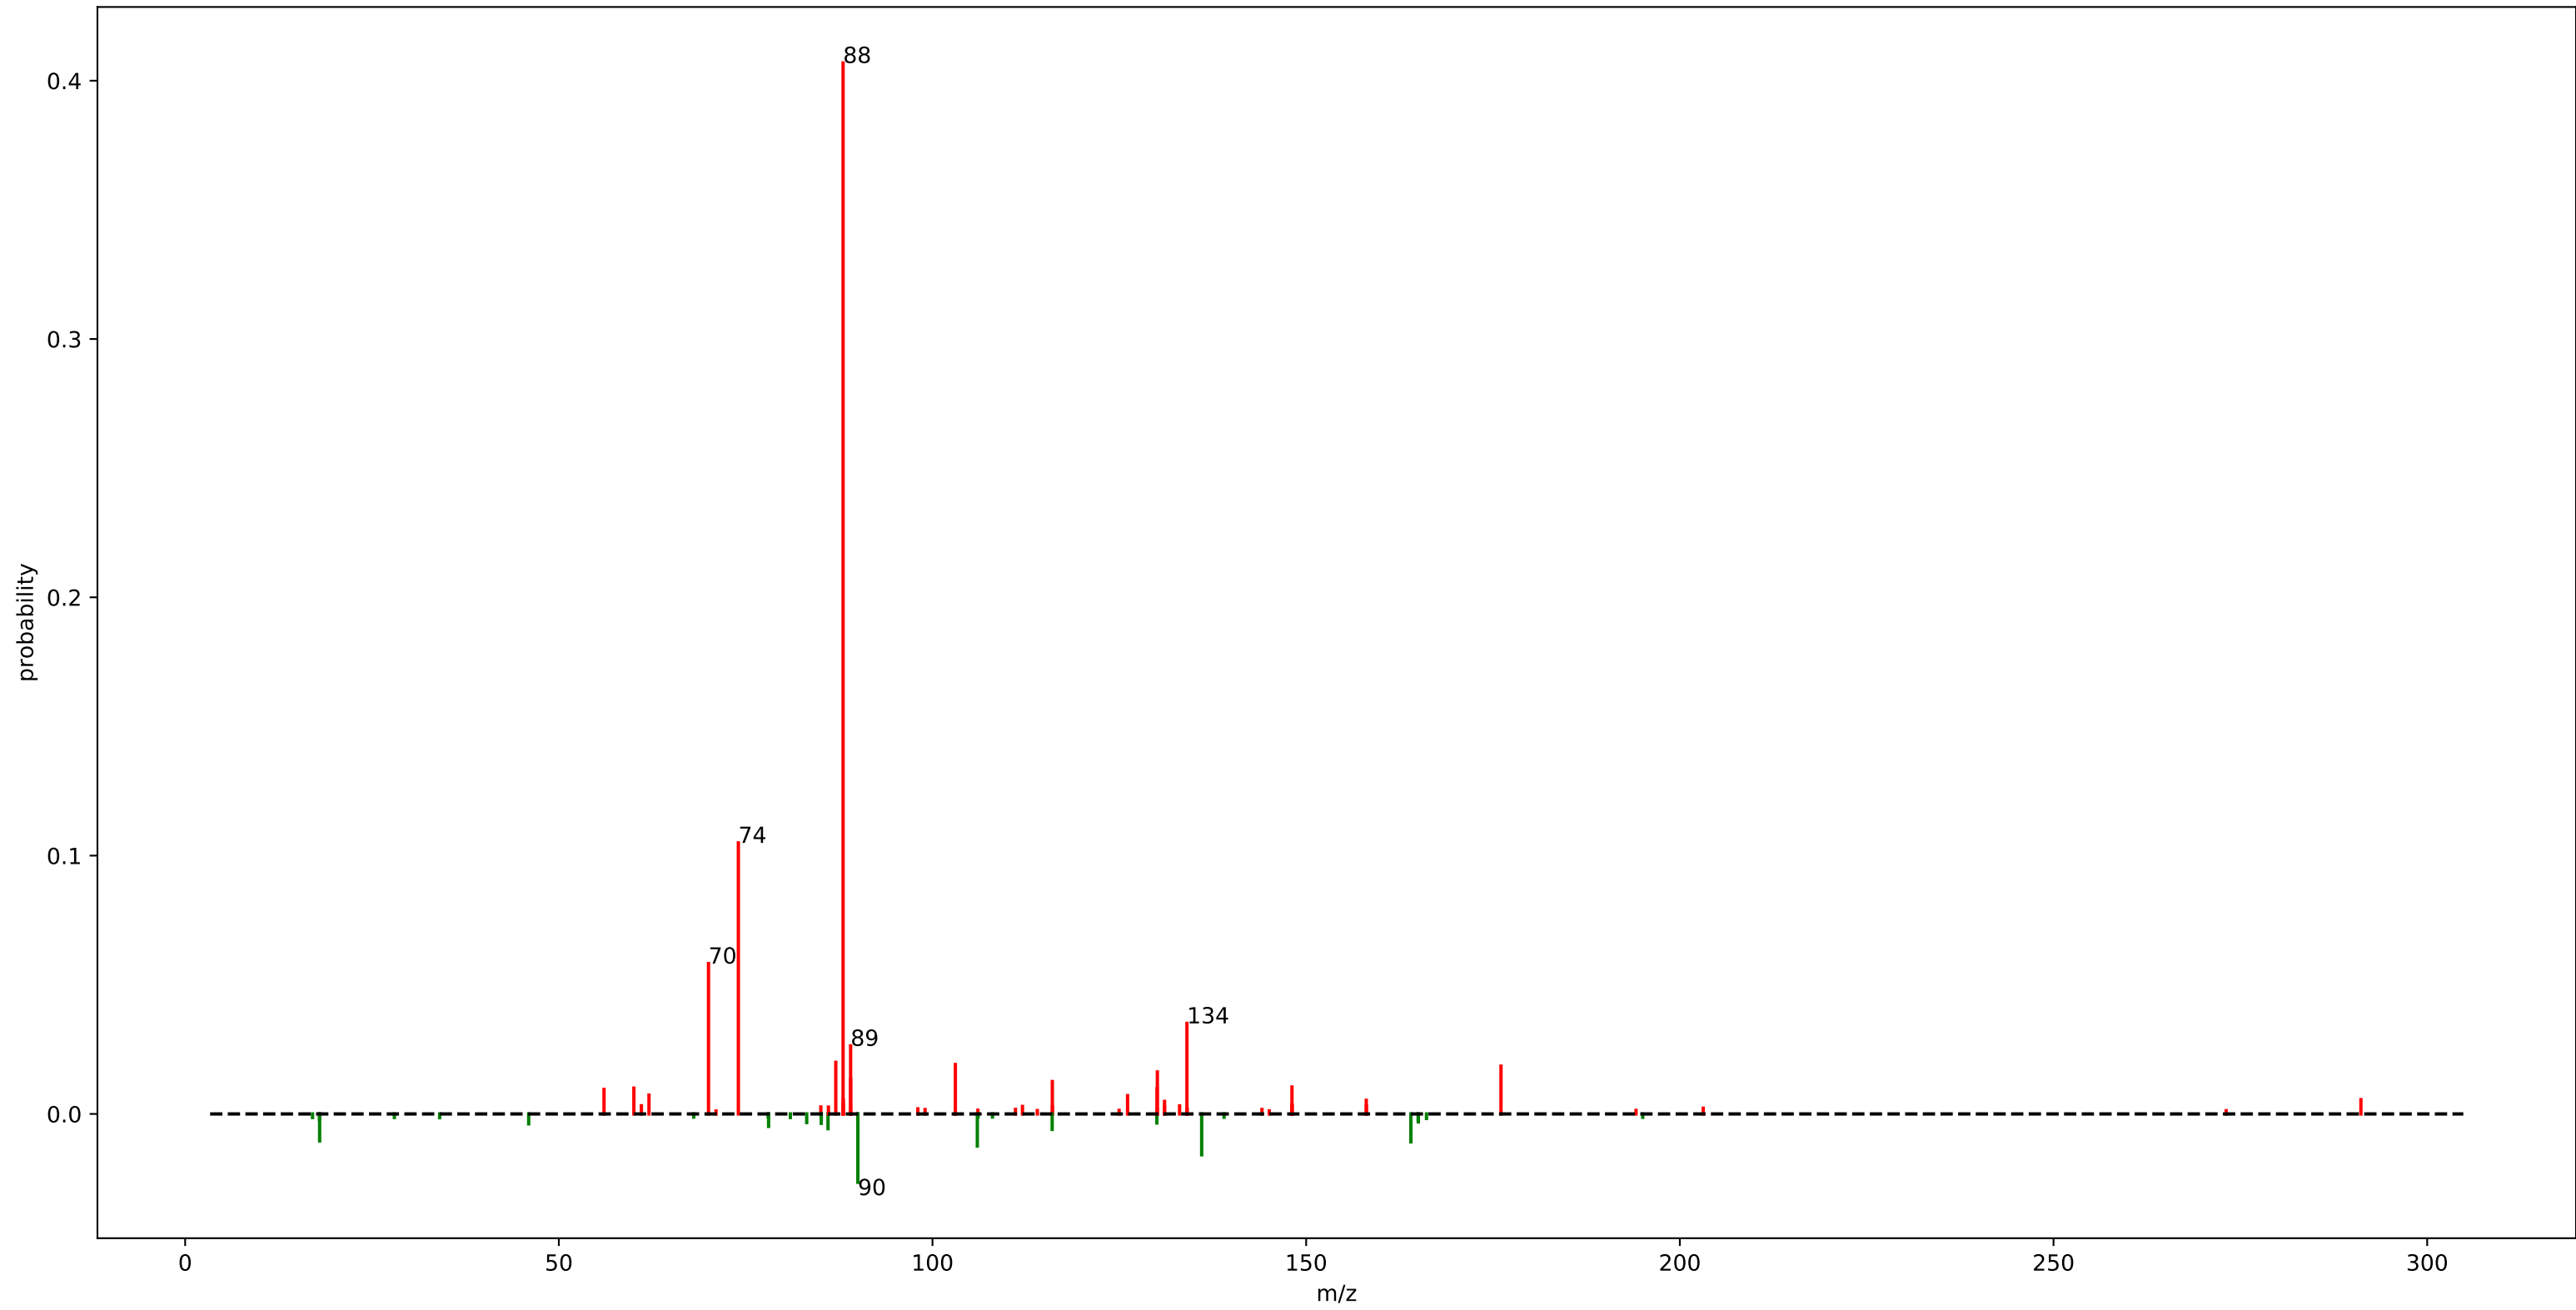

# urine\_mass2motif\_120.m2m

|                   |        |                   |        |
|-------------------|--------|-------------------|--------|
| fragment_88.0375  | : 0.41 | fragment_62.0625  | : 0.01 |
| fragment_74.0225  | : 0.10 | fragment_126.1025 | : 0.01 |
| fragment_70.0275  | : 0.06 | loss_116.0125     | : 0.01 |
| fragment_134.0475 | : 0.04 | loss_86.0175      | : 0.01 |
| loss_90.0125      | : 0.03 | fragment_291.1325 | : 0.01 |
| fragment_89.0425  | : 0.03 | fragment_88.0625  | : 0.01 |
| fragment_87.0575  | : 0.02 | fragment_158.0425 | : 0.01 |
| fragment_103.0575 | : 0.02 |                   |        |
| fragment_176.0675 | : 0.02 |                   |        |
| fragment_130.0875 | : 0.02 |                   |        |
| loss_136.0175     | : 0.02 |                   |        |
| fragment_89.0475  | : 0.01 |                   |        |
| fragment_116.0325 | : 0.01 |                   |        |
| loss_105.9975     | : 0.01 |                   |        |
| loss_164.0125     | : 0.01 |                   |        |
| loss_17.9925      | : 0.01 |                   |        |
| fragment_148.0975 | : 0.01 |                   |        |
| fragment_60.0425  | : 0.01 |                   |        |
| fragment_130.0475 | : 0.01 |                   |        |
| fragment_56.0475  | : 0.01 |                   |        |

motif\_582

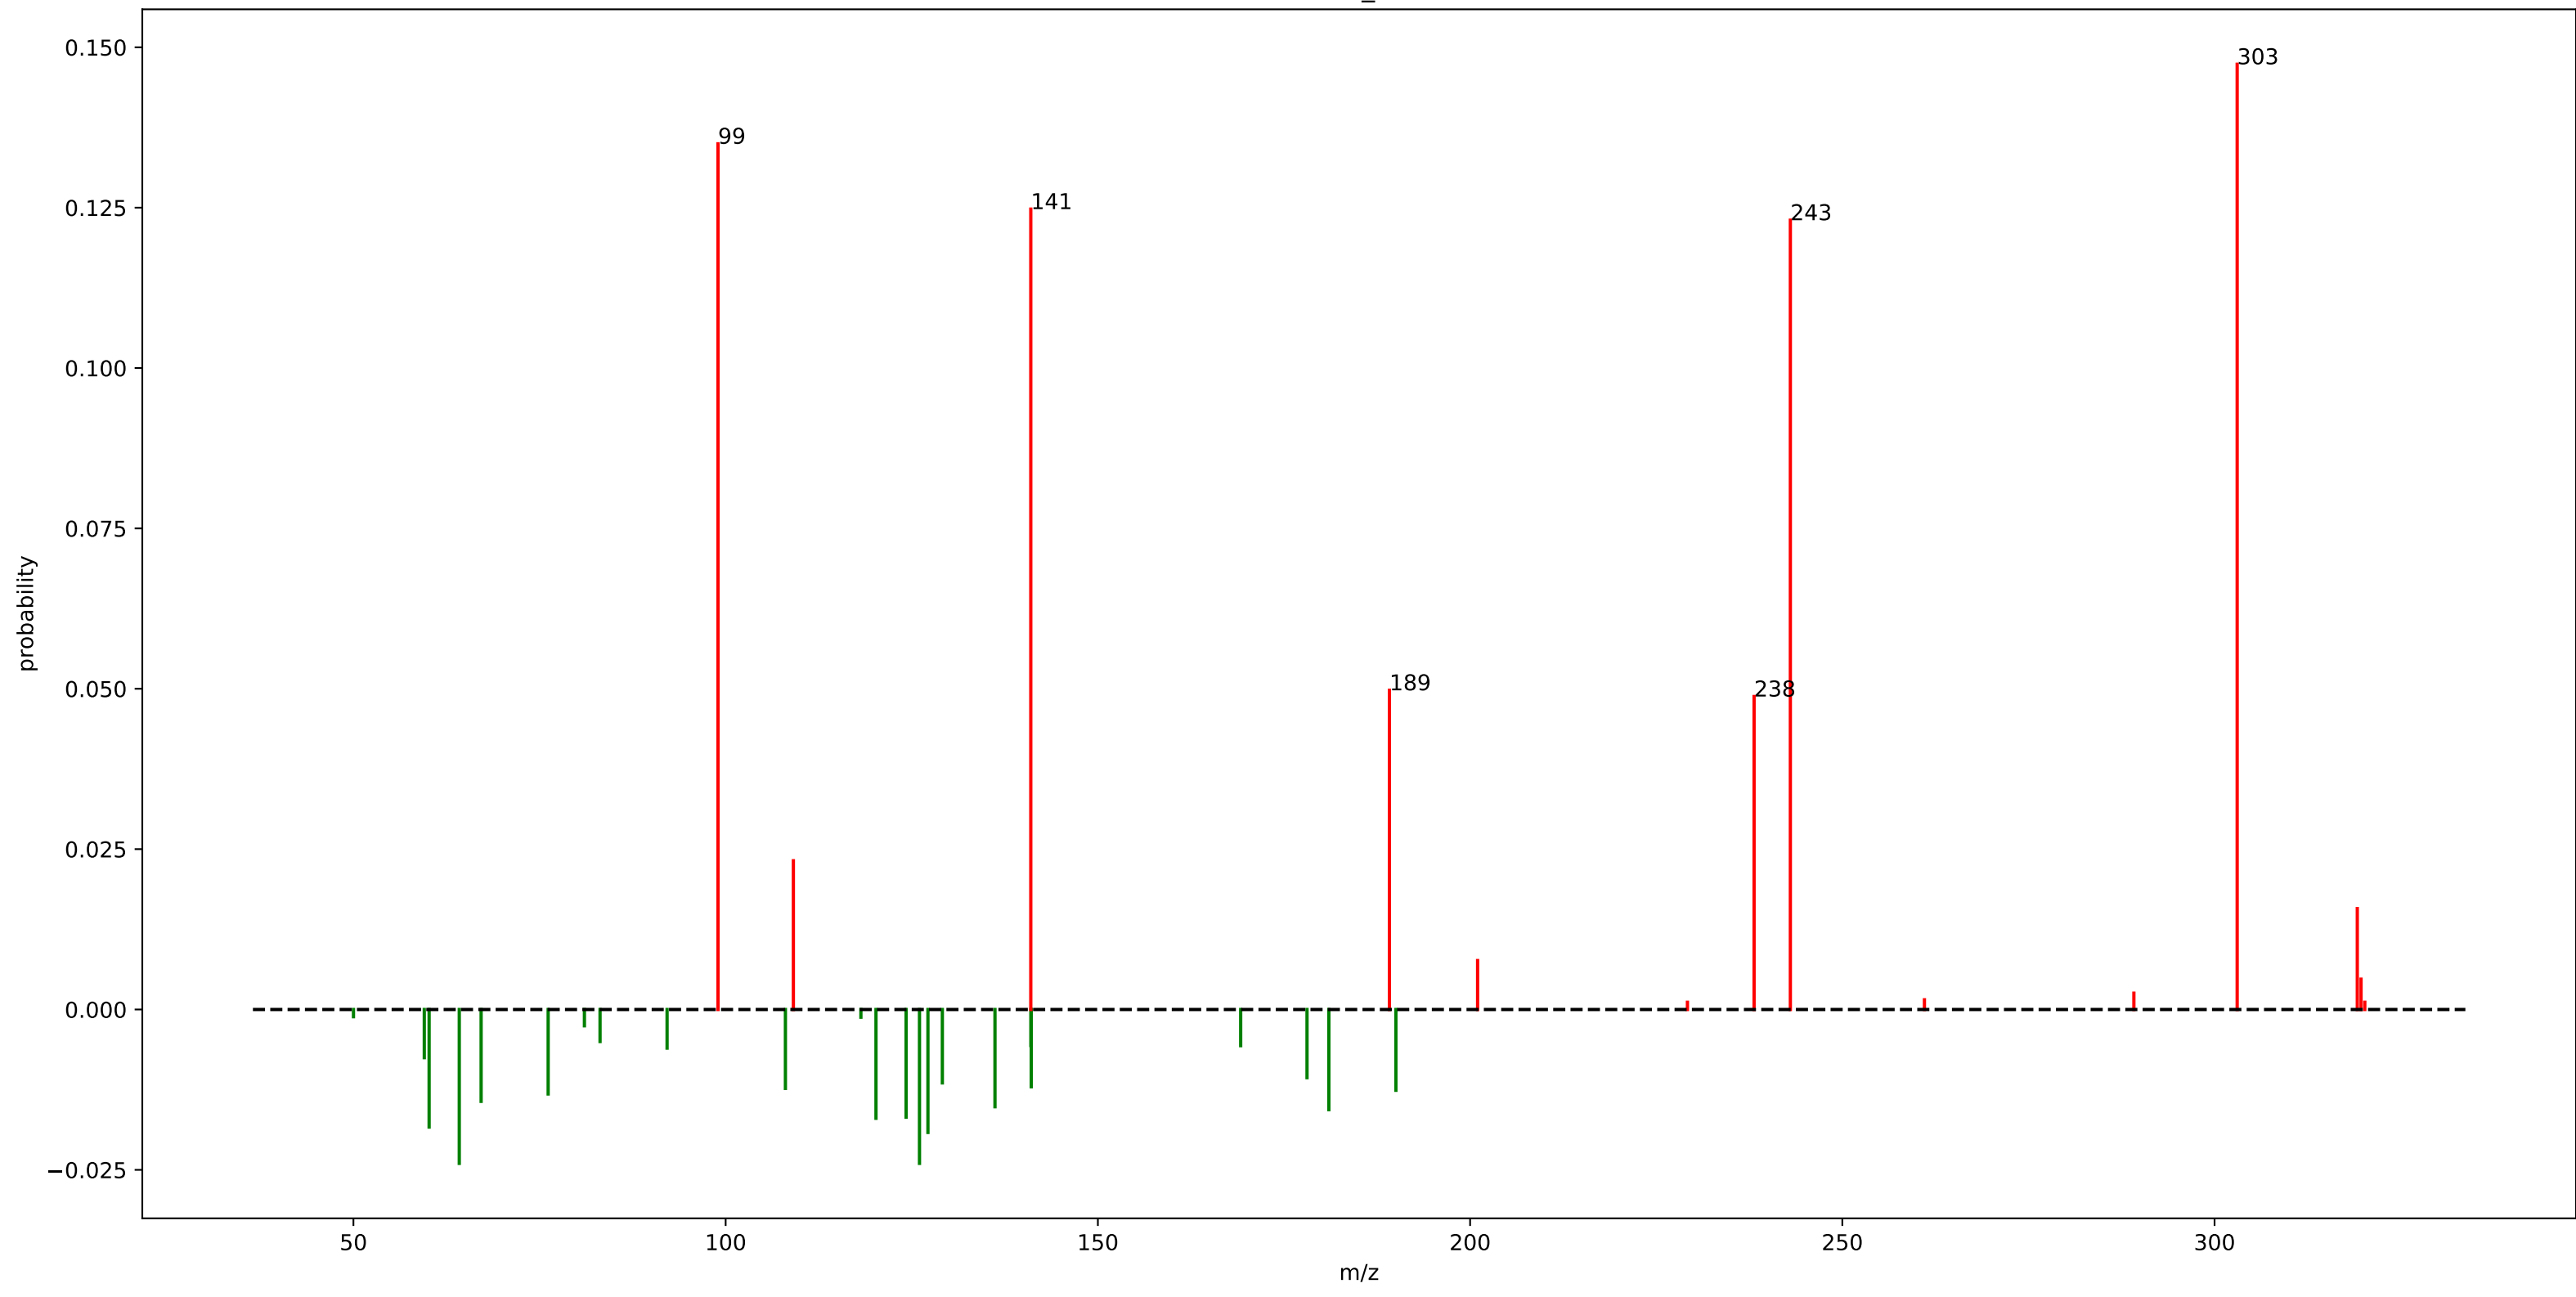

## motif\_582

|                   |        |                   |        |
|-------------------|--------|-------------------|--------|
| fragment_303.0375 | : 0.15 | loss_141.0475     | : 0.01 |
| fragment_98.9725  | : 0.13 | loss_129.1075     | : 0.01 |
| fragment_140.9875 | : 0.12 | loss_178.0925     | : 0.01 |
| fragment_243.0175 | : 0.12 | fragment_201.0075 | : 0.01 |
| fragment_189.1625 | : 0.05 | loss_59.5175      | : 0.01 |
| fragment_238.1475 | : 0.05 | loss_92.1325      | : 0.01 |
| loss_64.2175      | : 0.02 | loss_169.1825     | : 0.01 |
| loss_126.0375     | : 0.02 | loss_140.9975     | : 0.01 |
| fragment_109.0975 | : 0.02 |                   |        |
| loss_127.1725     | : 0.02 |                   |        |
| loss_60.1675      | : 0.02 |                   |        |
| loss_120.1925     | : 0.02 |                   |        |
| loss_124.2375     | : 0.02 |                   |        |
| fragment_319.1725 | : 0.02 |                   |        |
| loss_181.0275     | : 0.02 |                   |        |
| loss_136.1775     | : 0.02 |                   |        |
| loss_67.1525      | : 0.01 |                   |        |
| loss_76.1575      | : 0.01 |                   |        |
| loss_190.0325     | : 0.01 |                   |        |
| loss_108.0275     | : 0.01 |                   |        |



motif\_583

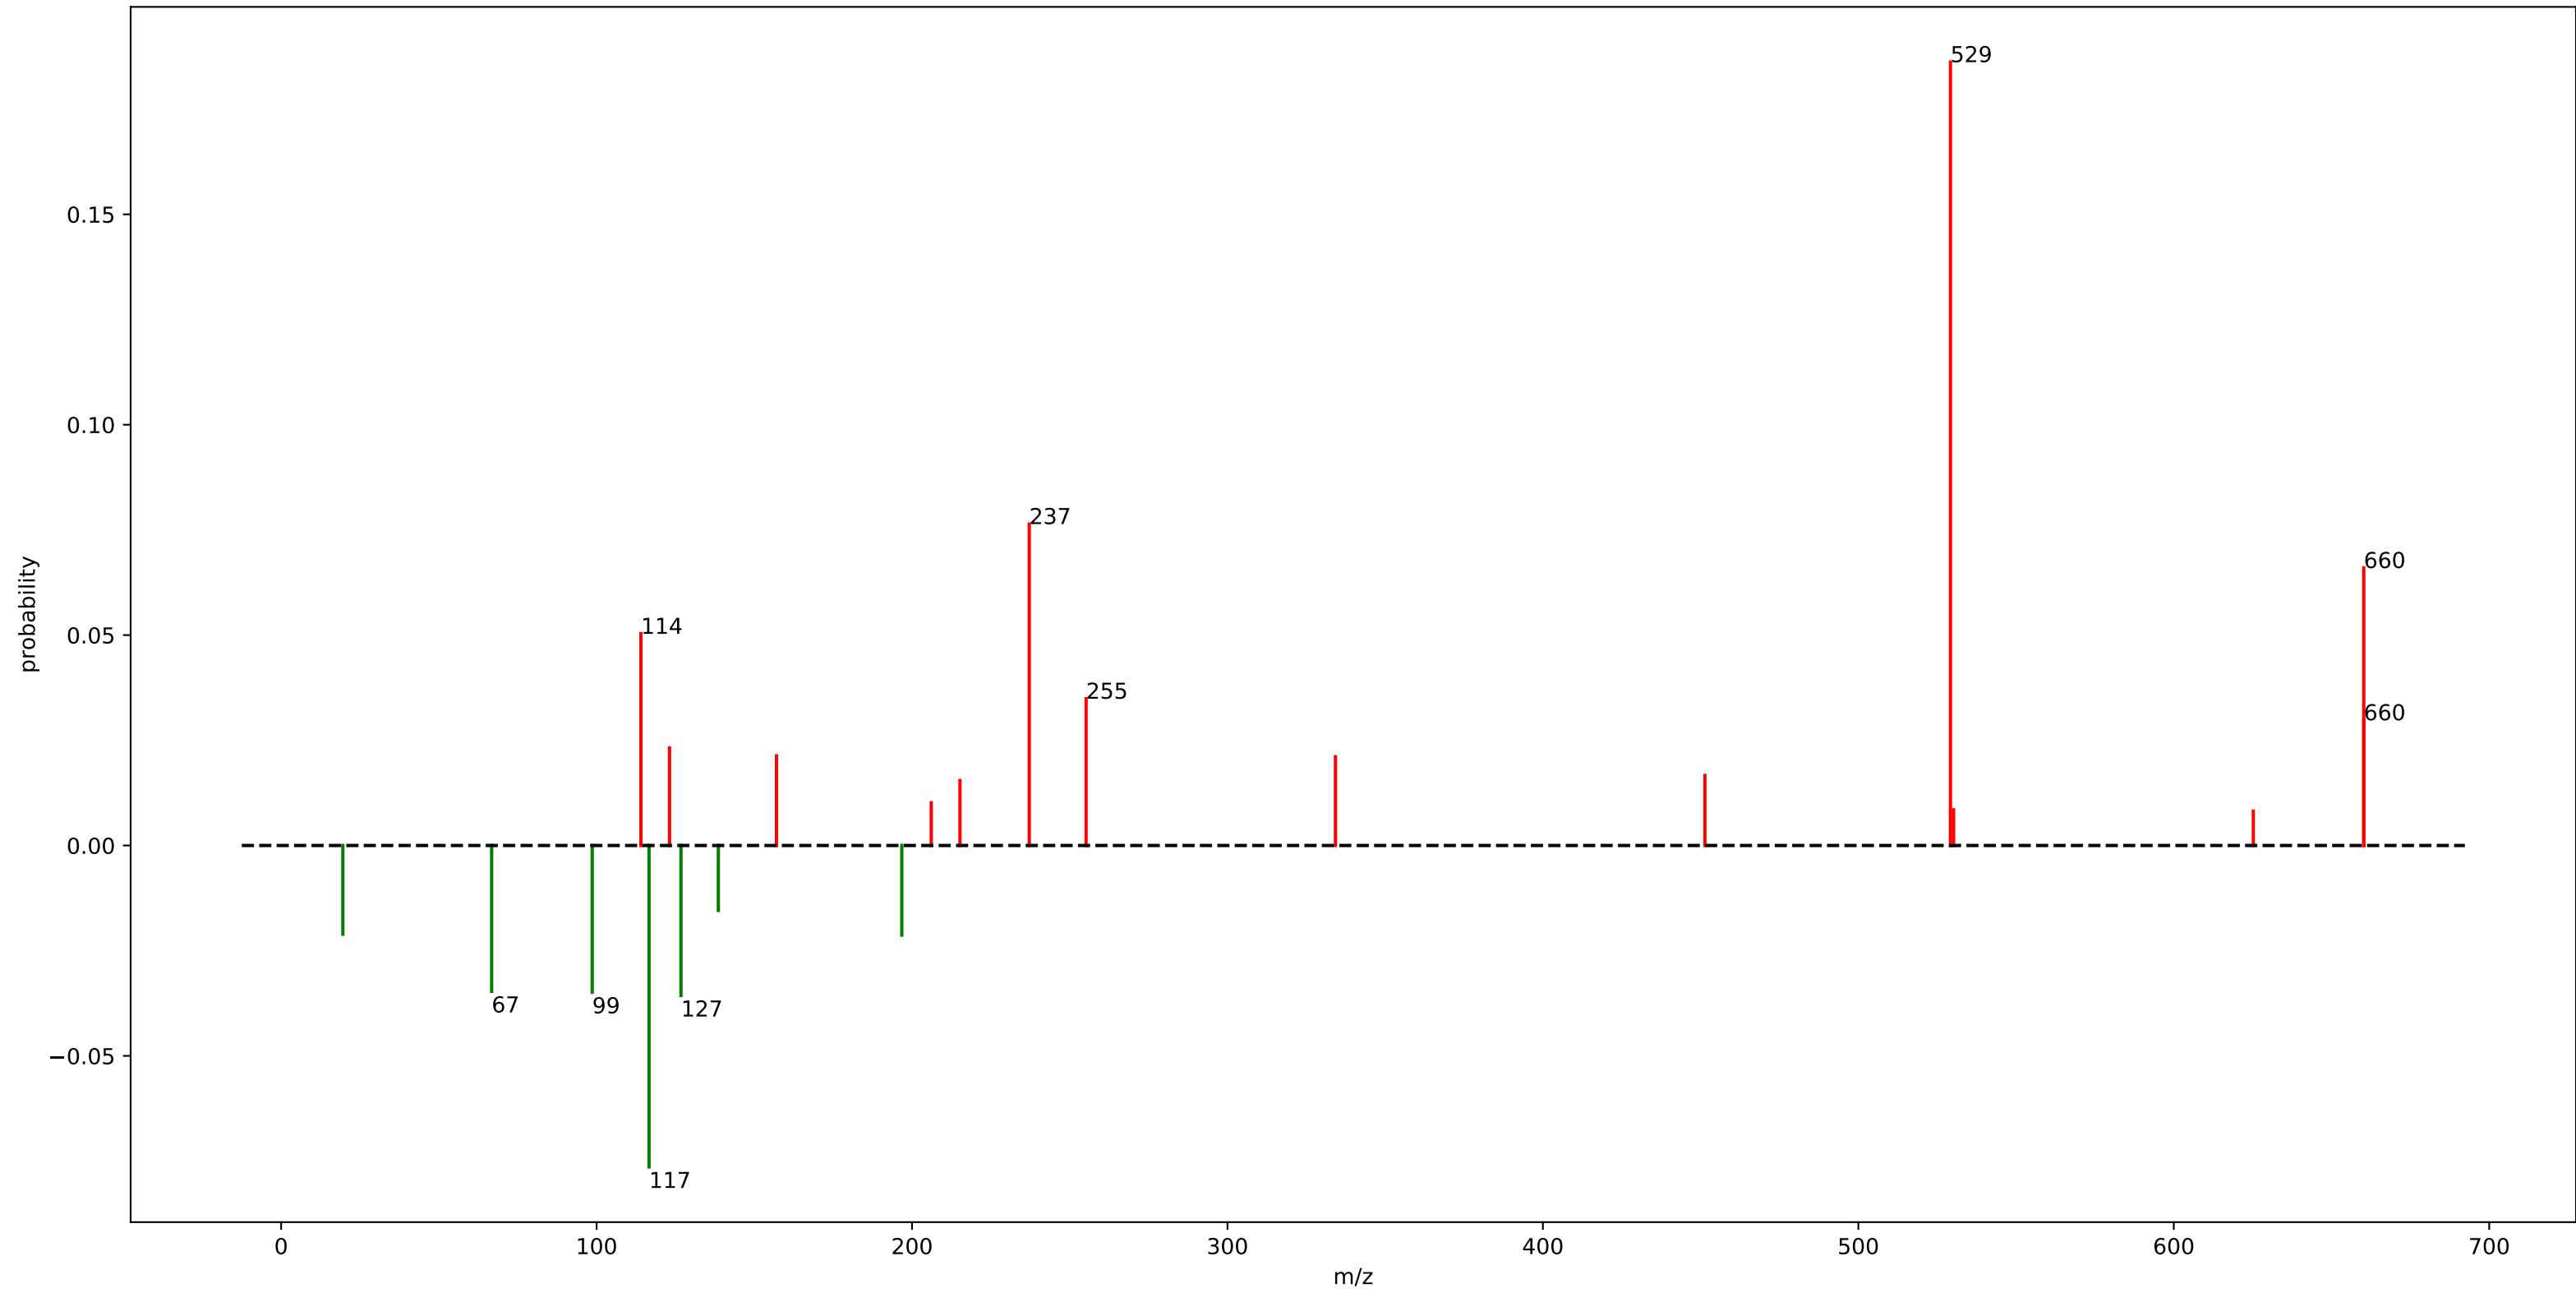

## motif\_583

|                   |        |                   |        |
|-------------------|--------|-------------------|--------|
| fragment_529.1975 | : 0.19 | fragment_625.2175 | : 0.01 |
| loss_116.6225     | : 0.08 |                   |        |
| fragment_237.1675 | : 0.08 |                   |        |
| fragment_660.2375 | : 0.07 |                   |        |
| fragment_114.0525 | : 0.05 |                   |        |
| loss_126.7525     | : 0.04 |                   |        |
| loss_98.6125      | : 0.03 |                   |        |
| fragment_255.1825 | : 0.03 |                   |        |
| loss_66.7325      | : 0.03 |                   |        |
| fragment_660.2325 | : 0.03 |                   |        |
| fragment_123.1175 | : 0.02 |                   |        |
| loss_196.7575     | : 0.02 |                   |        |
| fragment_157.0325 | : 0.02 |                   |        |
| loss_19.5575      | : 0.02 |                   |        |
| fragment_334.2375 | : 0.02 |                   |        |
| fragment_451.3625 | : 0.02 |                   |        |
| loss_138.5925     | : 0.02 |                   |        |
| fragment_215.1975 | : 0.02 |                   |        |
| fragment_206.0925 | : 0.01 |                   |        |
| fragment_530.1975 | : 0.01 |                   |        |

motif\_584

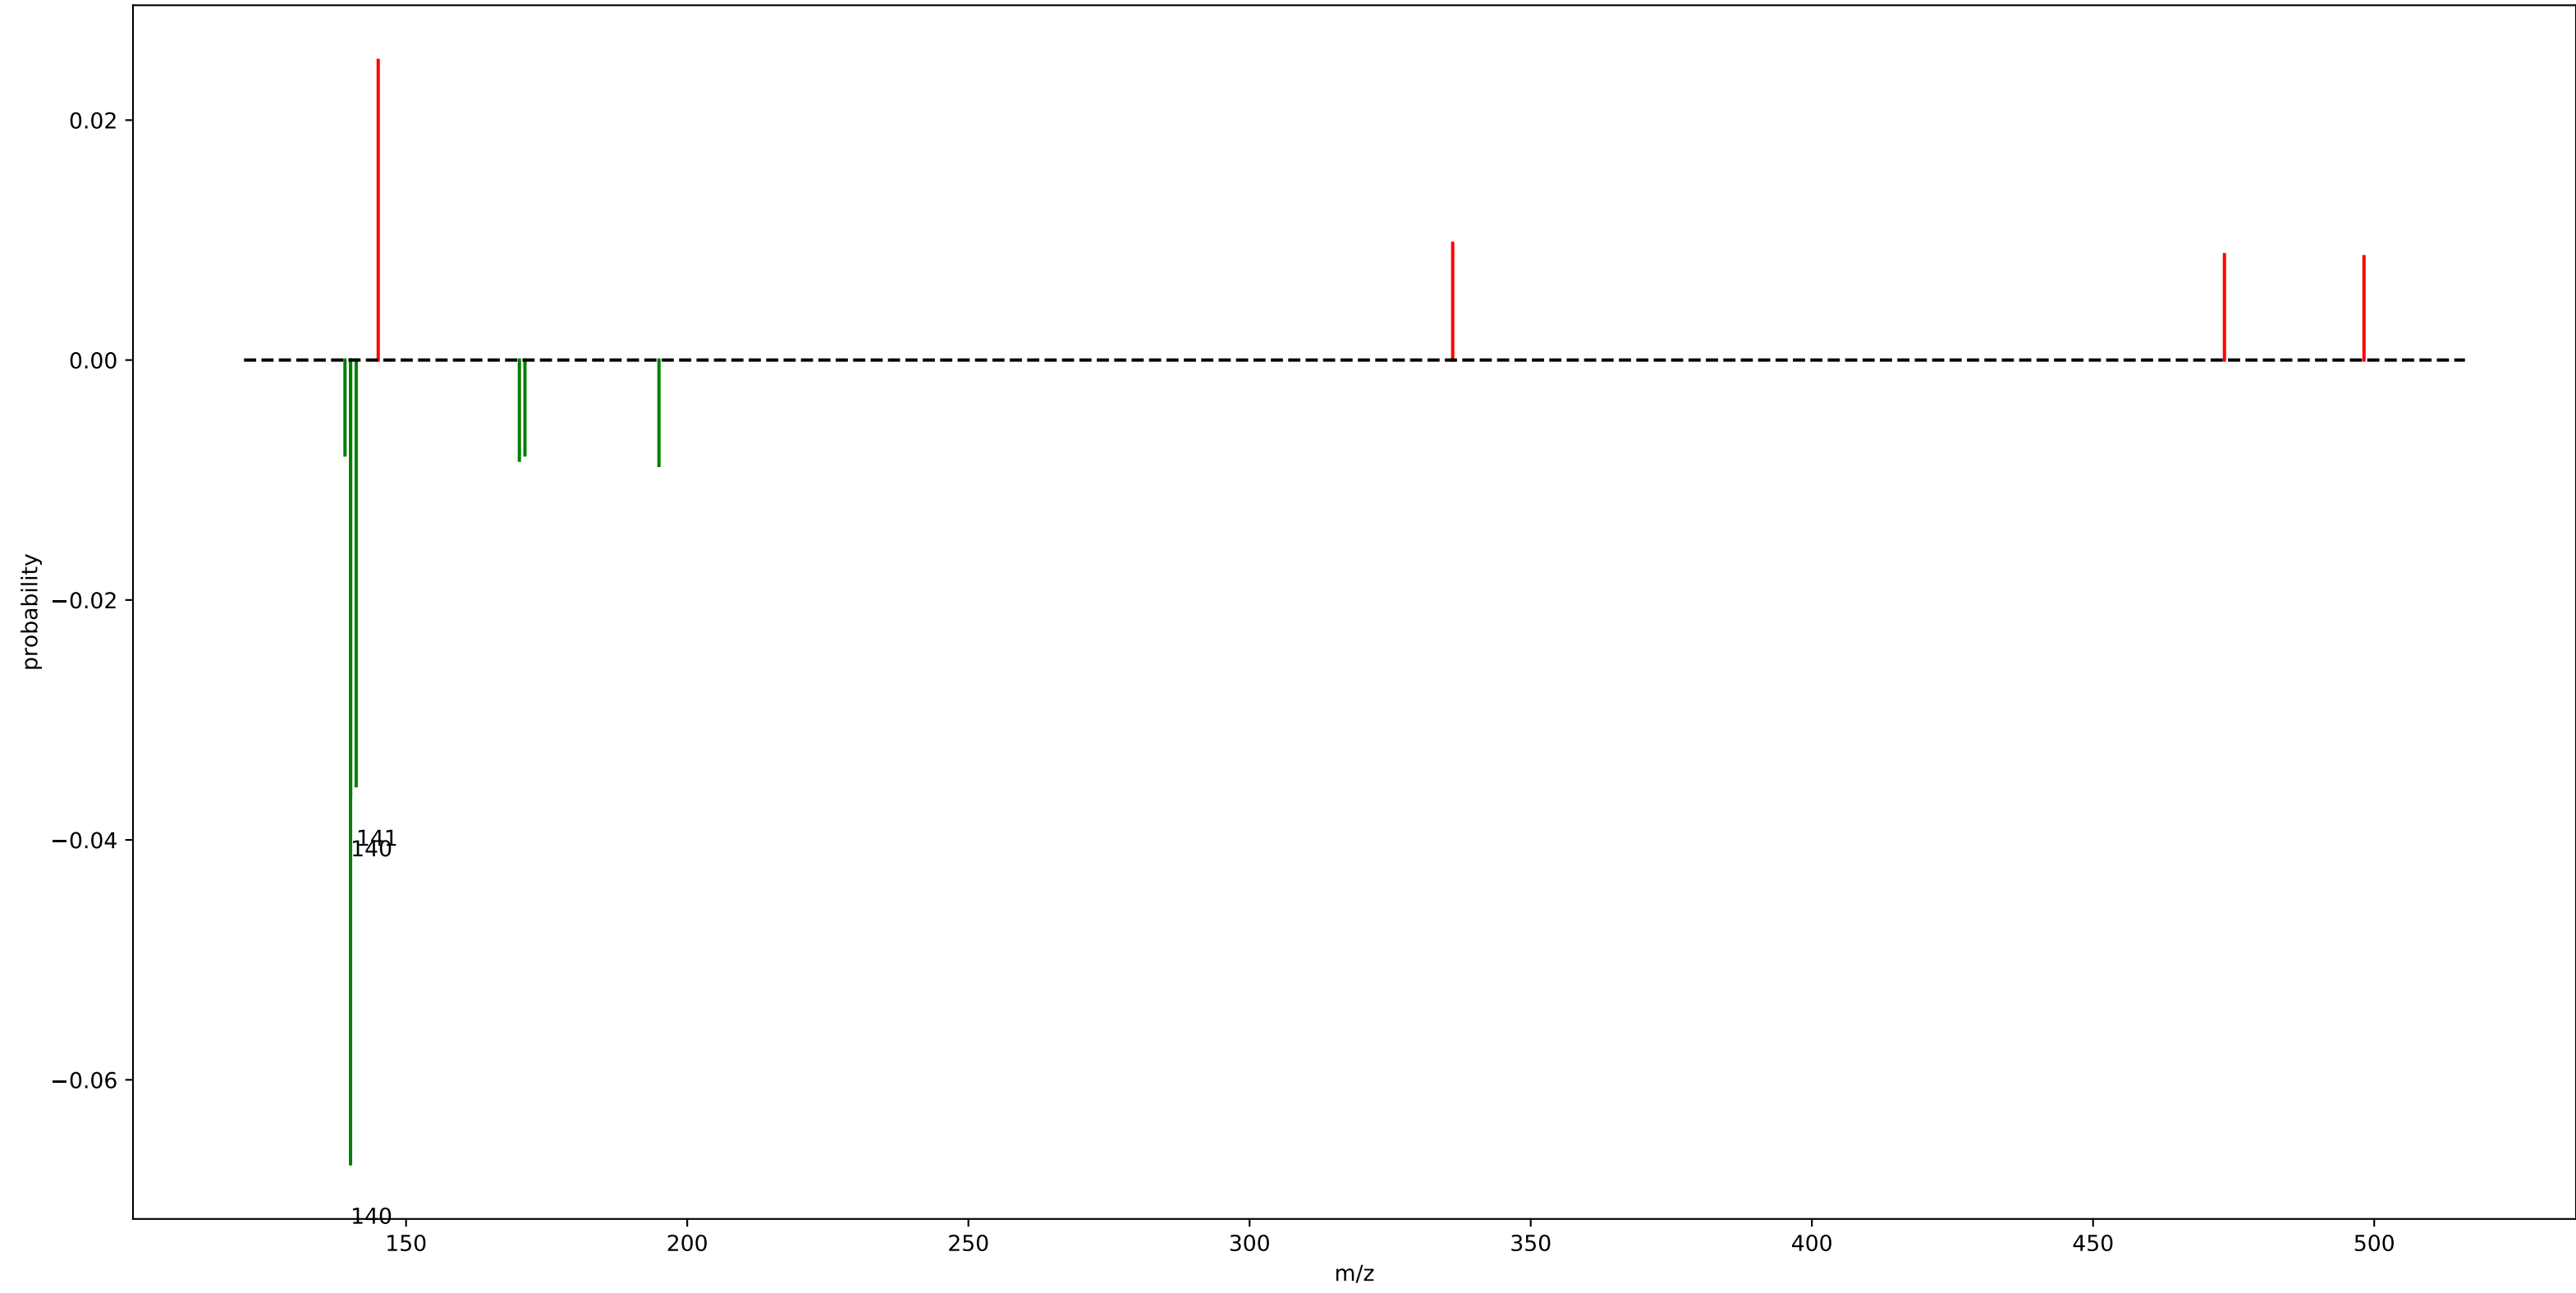

## motif\_584

|                   |        |
|-------------------|--------|
| loss_140.1275     | : 0.07 |
| loss_140.1425     | : 0.04 |
| loss_141.1325     | : 0.04 |
| fragment_145.0475 | : 0.02 |
| fragment_336.1275 | : 0.01 |
| loss_194.9725     | : 0.01 |
| fragment_473.3625 | : 0.01 |
| fragment_498.1825 | : 0.01 |
| loss_170.1525     | : 0.01 |
| loss_139.1375     | : 0.01 |
| loss_171.1425     | : 0.01 |

motif\_585

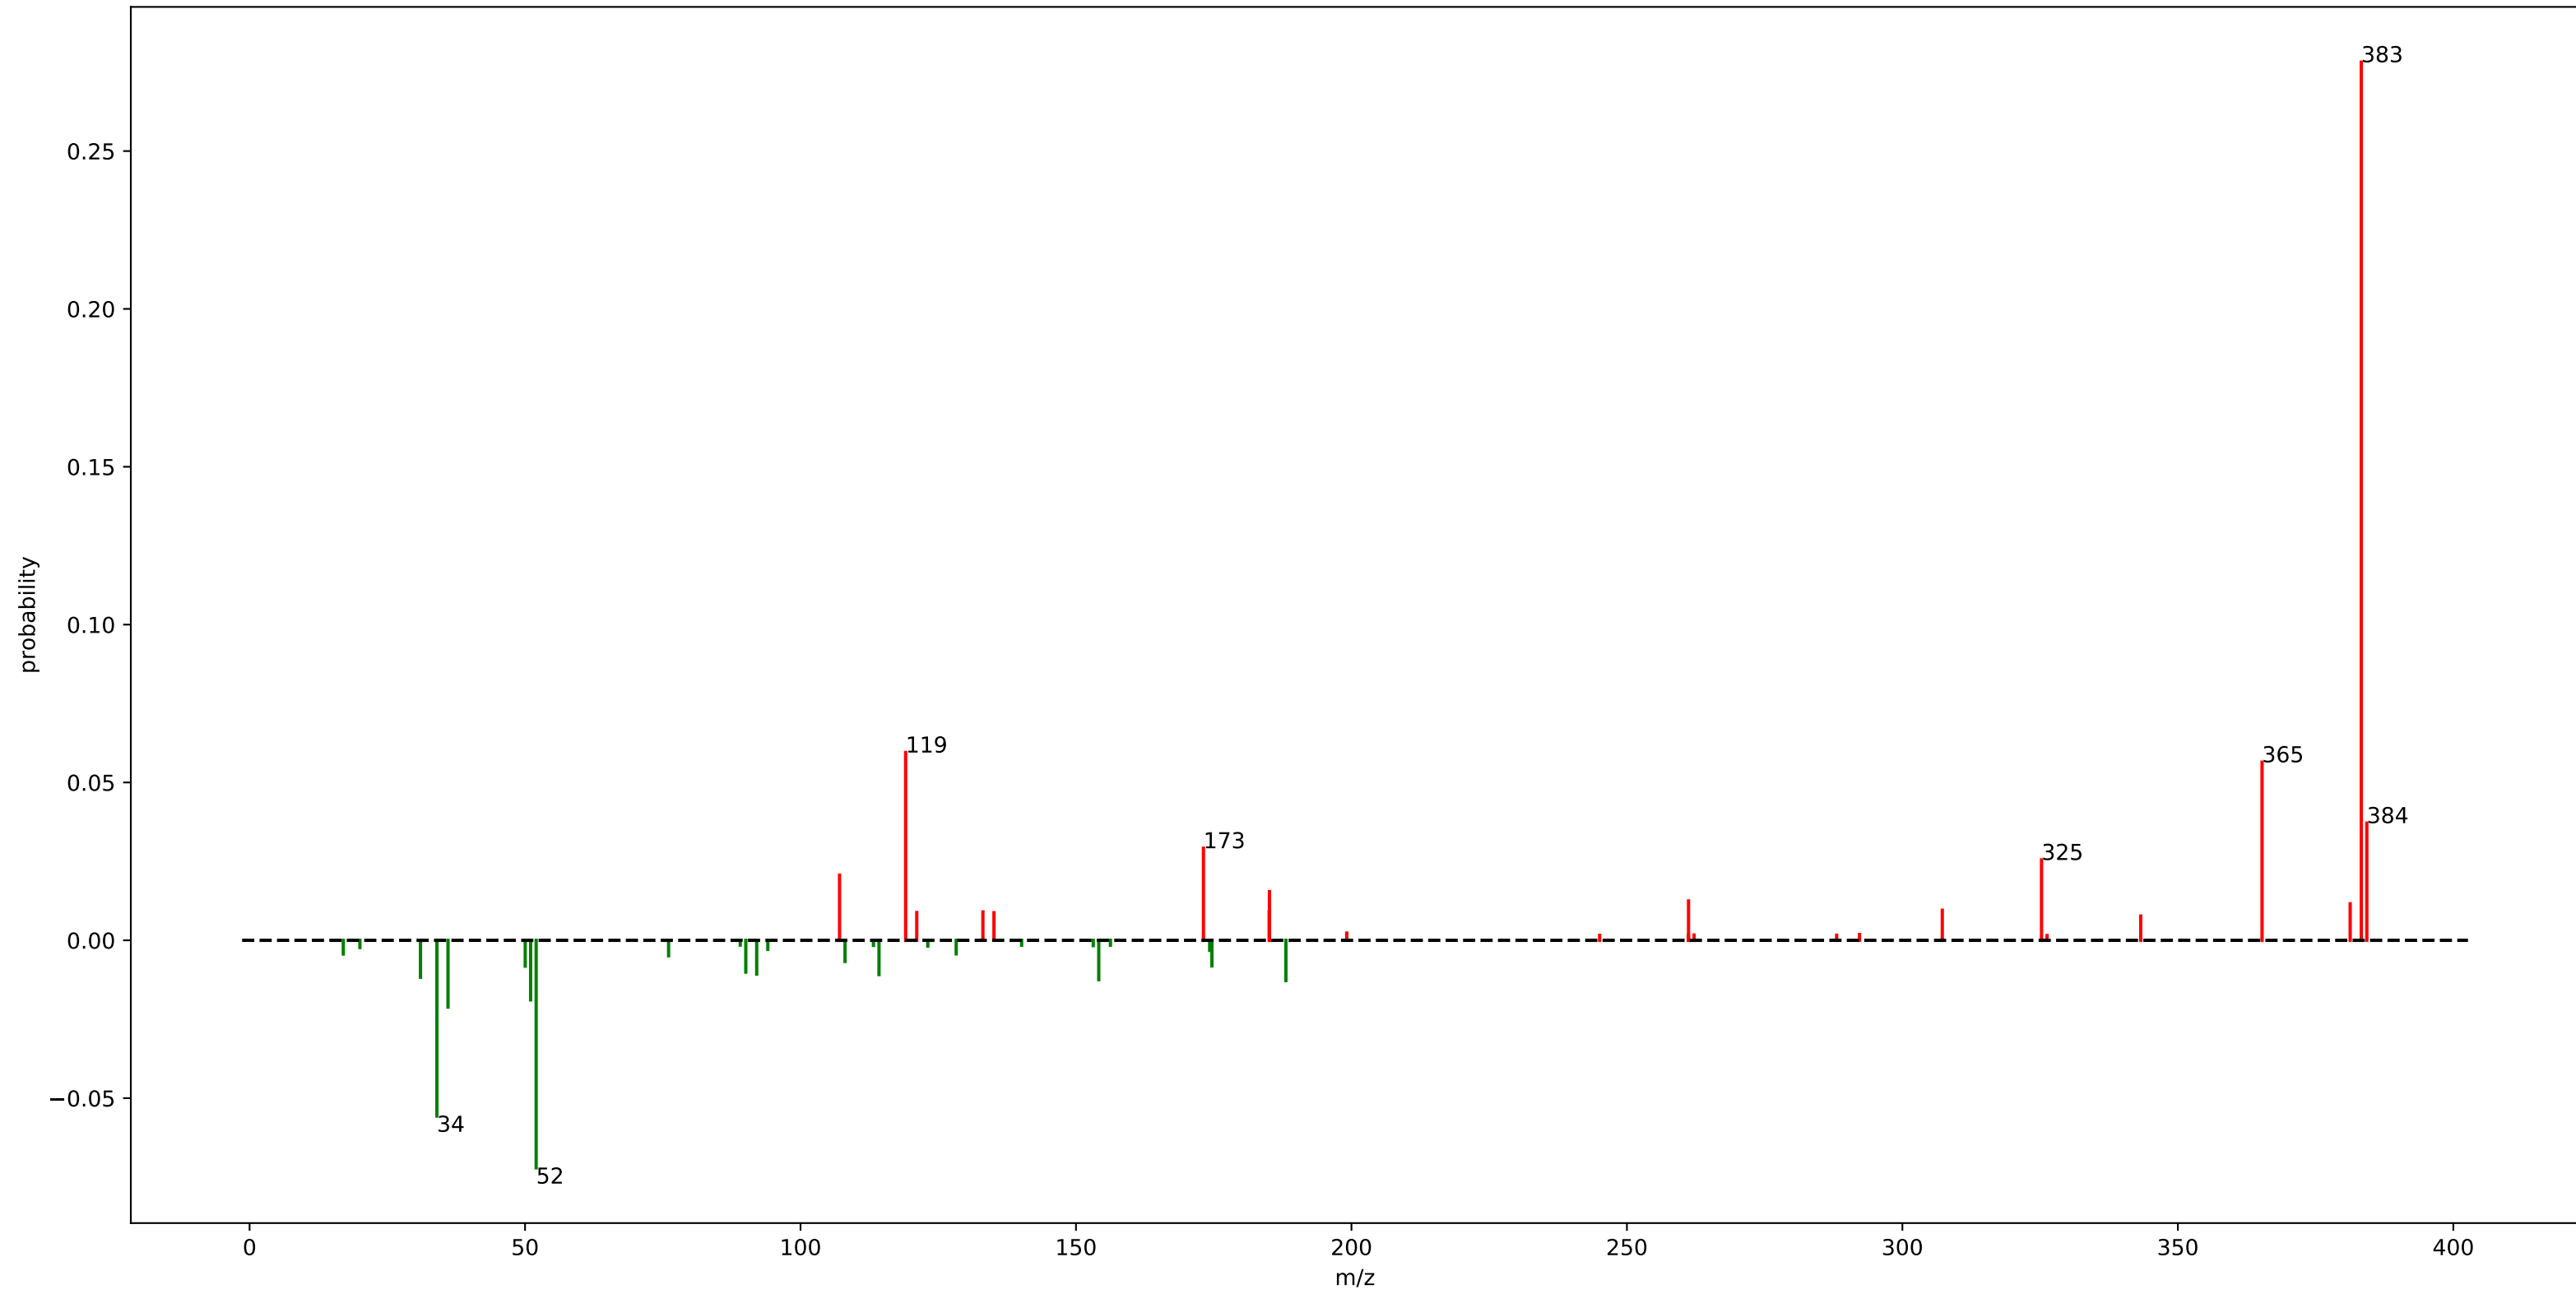

# motif\_585

|                   |        |                   |        |
|-------------------|--------|-------------------|--------|
| fragment_383.2925 | : 0.28 | fragment_307.2425 | : 0.01 |
| loss_52.0175      | : 0.07 | fragment_185.0675 | : 0.01 |
| fragment_119.0825 | : 0.06 | fragment_133.1025 | : 0.01 |
| fragment_365.2825 | : 0.06 | fragment_121.0975 | : 0.01 |
| loss_34.0025      | : 0.06 | fragment_135.1125 | : 0.01 |
| fragment_384.2975 | : 0.04 | loss_50.0325      | : 0.01 |
| fragment_173.1325 | : 0.03 | loss_174.6725     | : 0.01 |
| fragment_325.2525 | : 0.03 | fragment_343.2625 | : 0.01 |
| loss_36.0175      | : 0.02 | loss_108.0775     | : 0.01 |
| fragment_107.0825 | : 0.02 |                   |        |
| loss_51.0125      | : 0.02 |                   |        |
| fragment_185.1125 | : 0.02 |                   |        |
| loss_188.1025     | : 0.01 |                   |        |
| fragment_261.1825 | : 0.01 |                   |        |
| loss_154.1325     | : 0.01 |                   |        |
| loss_31.0225      | : 0.01 |                   |        |
| fragment_381.2775 | : 0.01 |                   |        |
| loss_114.2425     | : 0.01 |                   |        |
| loss_92.0475      | : 0.01 |                   |        |
| loss_90.0675      | : 0.01 |                   |        |

motif\_586

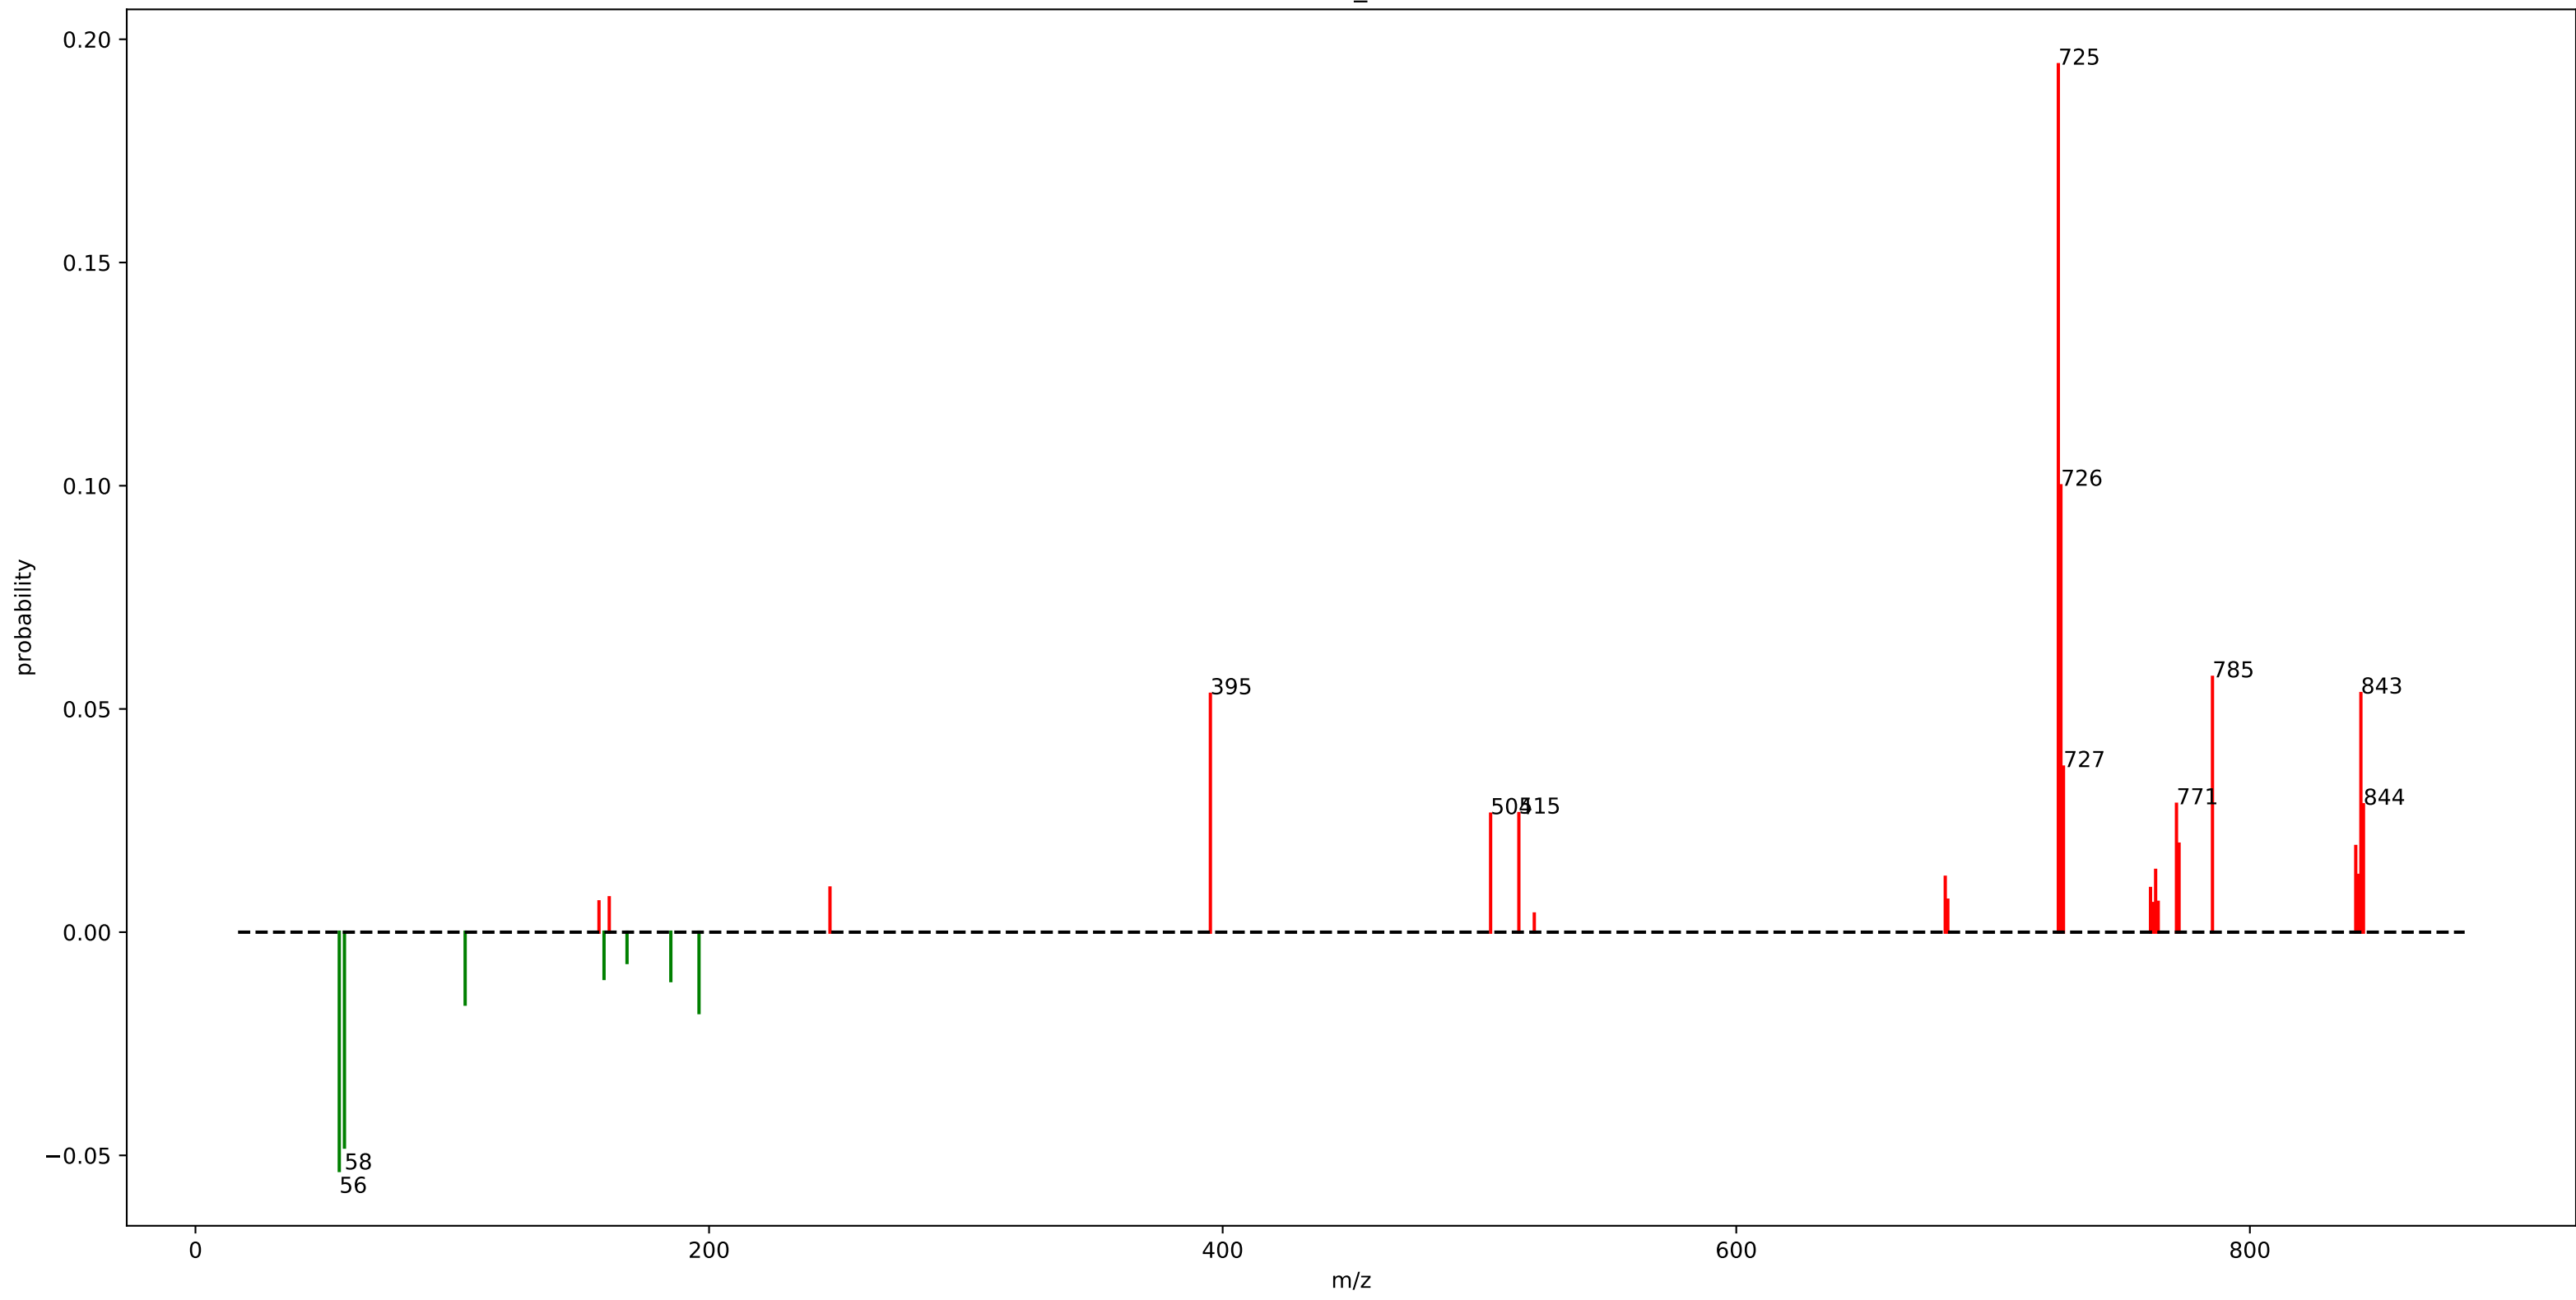

## motif\_586

|                   |        |                   |        |
|-------------------|--------|-------------------|--------|
| fragment_725.4125 | : 0.19 | loss_159.0975     | : 0.01 |
| fragment_726.4125 | : 0.10 | fragment_247.0825 | : 0.01 |
| fragment_785.4325 | : 0.06 | fragment_761.3025 | : 0.01 |
| fragment_843.2275 | : 0.05 | fragment_161.1325 | : 0.01 |
| loss_56.0025      | : 0.05 | fragment_682.3775 | : 0.01 |
| fragment_395.2175 | : 0.05 | loss_168.0525     | : 0.01 |
| loss_58.0175      | : 0.05 | fragment_157.1325 | : 0.01 |
| fragment_727.4125 | : 0.04 | fragment_764.3025 | : 0.01 |
| fragment_771.4175 | : 0.03 | fragment_762.3025 | : 0.01 |
| fragment_844.2275 | : 0.03 |                   |        |
| fragment_515.3375 | : 0.03 |                   |        |
| fragment_504.3375 | : 0.03 |                   |        |
| fragment_772.4225 | : 0.02 |                   |        |
| fragment_841.2275 | : 0.02 |                   |        |
| loss_196.0825     | : 0.02 |                   |        |
| loss_105.0175     | : 0.02 |                   |        |
| fragment_763.2975 | : 0.01 |                   |        |
| fragment_842.2275 | : 0.01 |                   |        |
| fragment_681.3775 | : 0.01 |                   |        |
| loss_185.1125     | : 0.01 |                   |        |



motif\_587

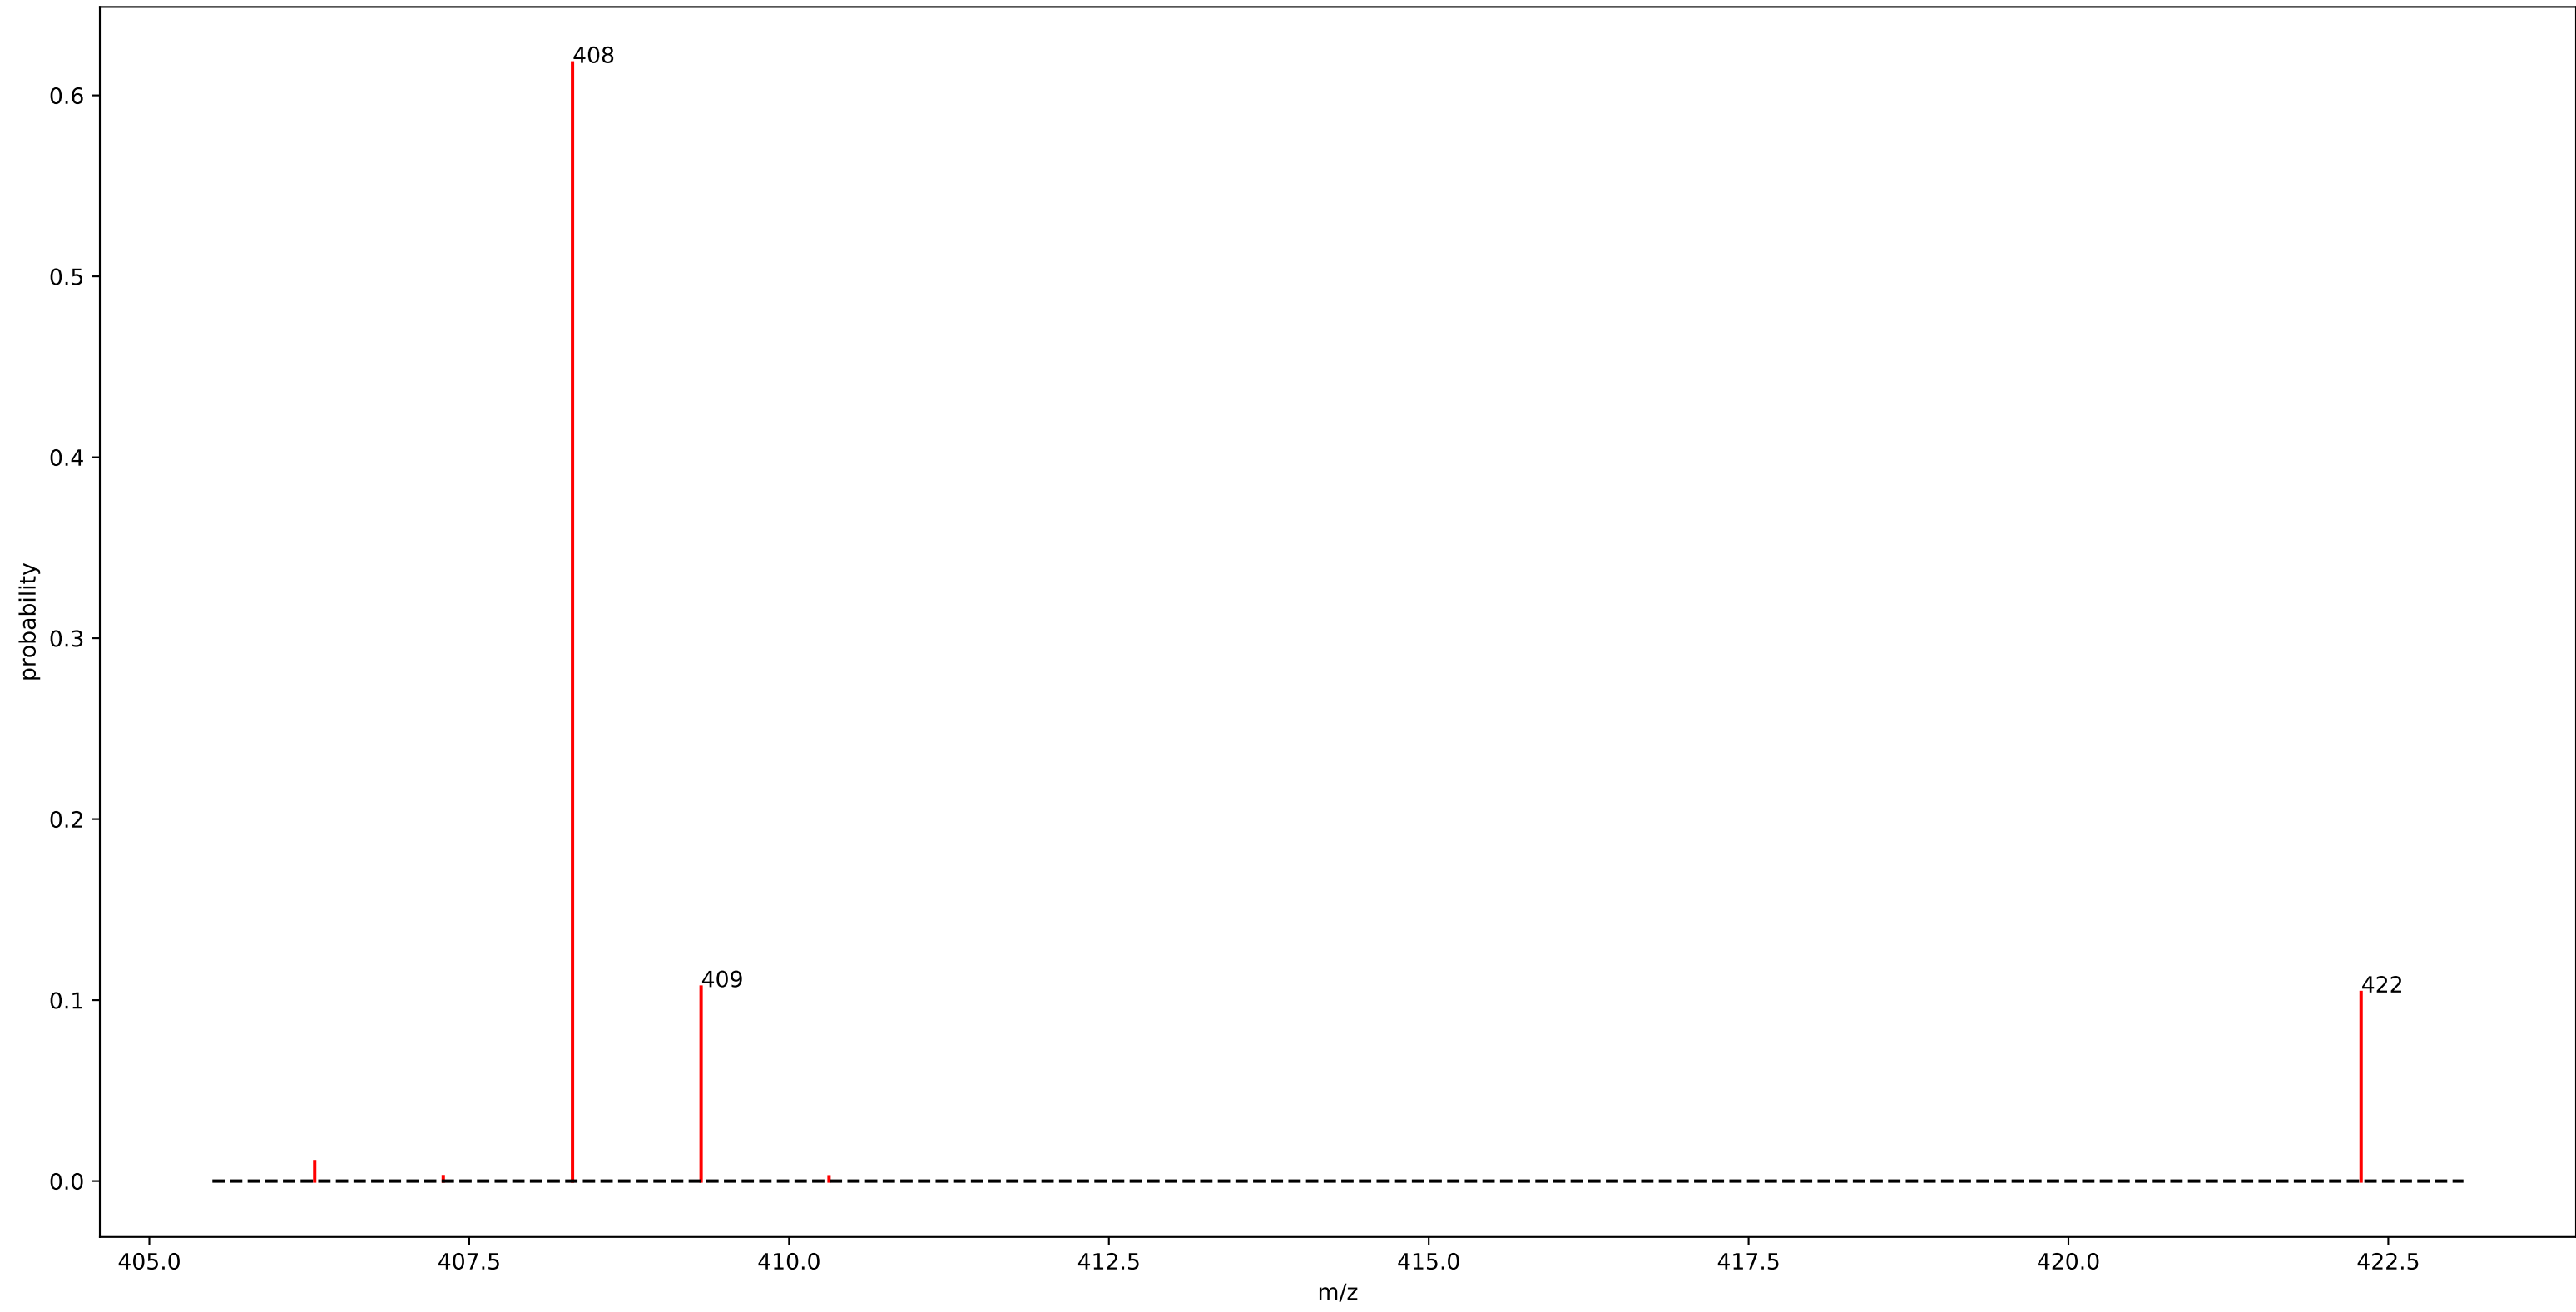

## motif\_587

|                   |        |
|-------------------|--------|
| fragment_408.3075 | : 0.62 |
| fragment_409.3125 | : 0.11 |
| fragment_422.2875 | : 0.10 |
| fragment_406.2925 | : 0.01 |

gnps\_motif\_41.m2m

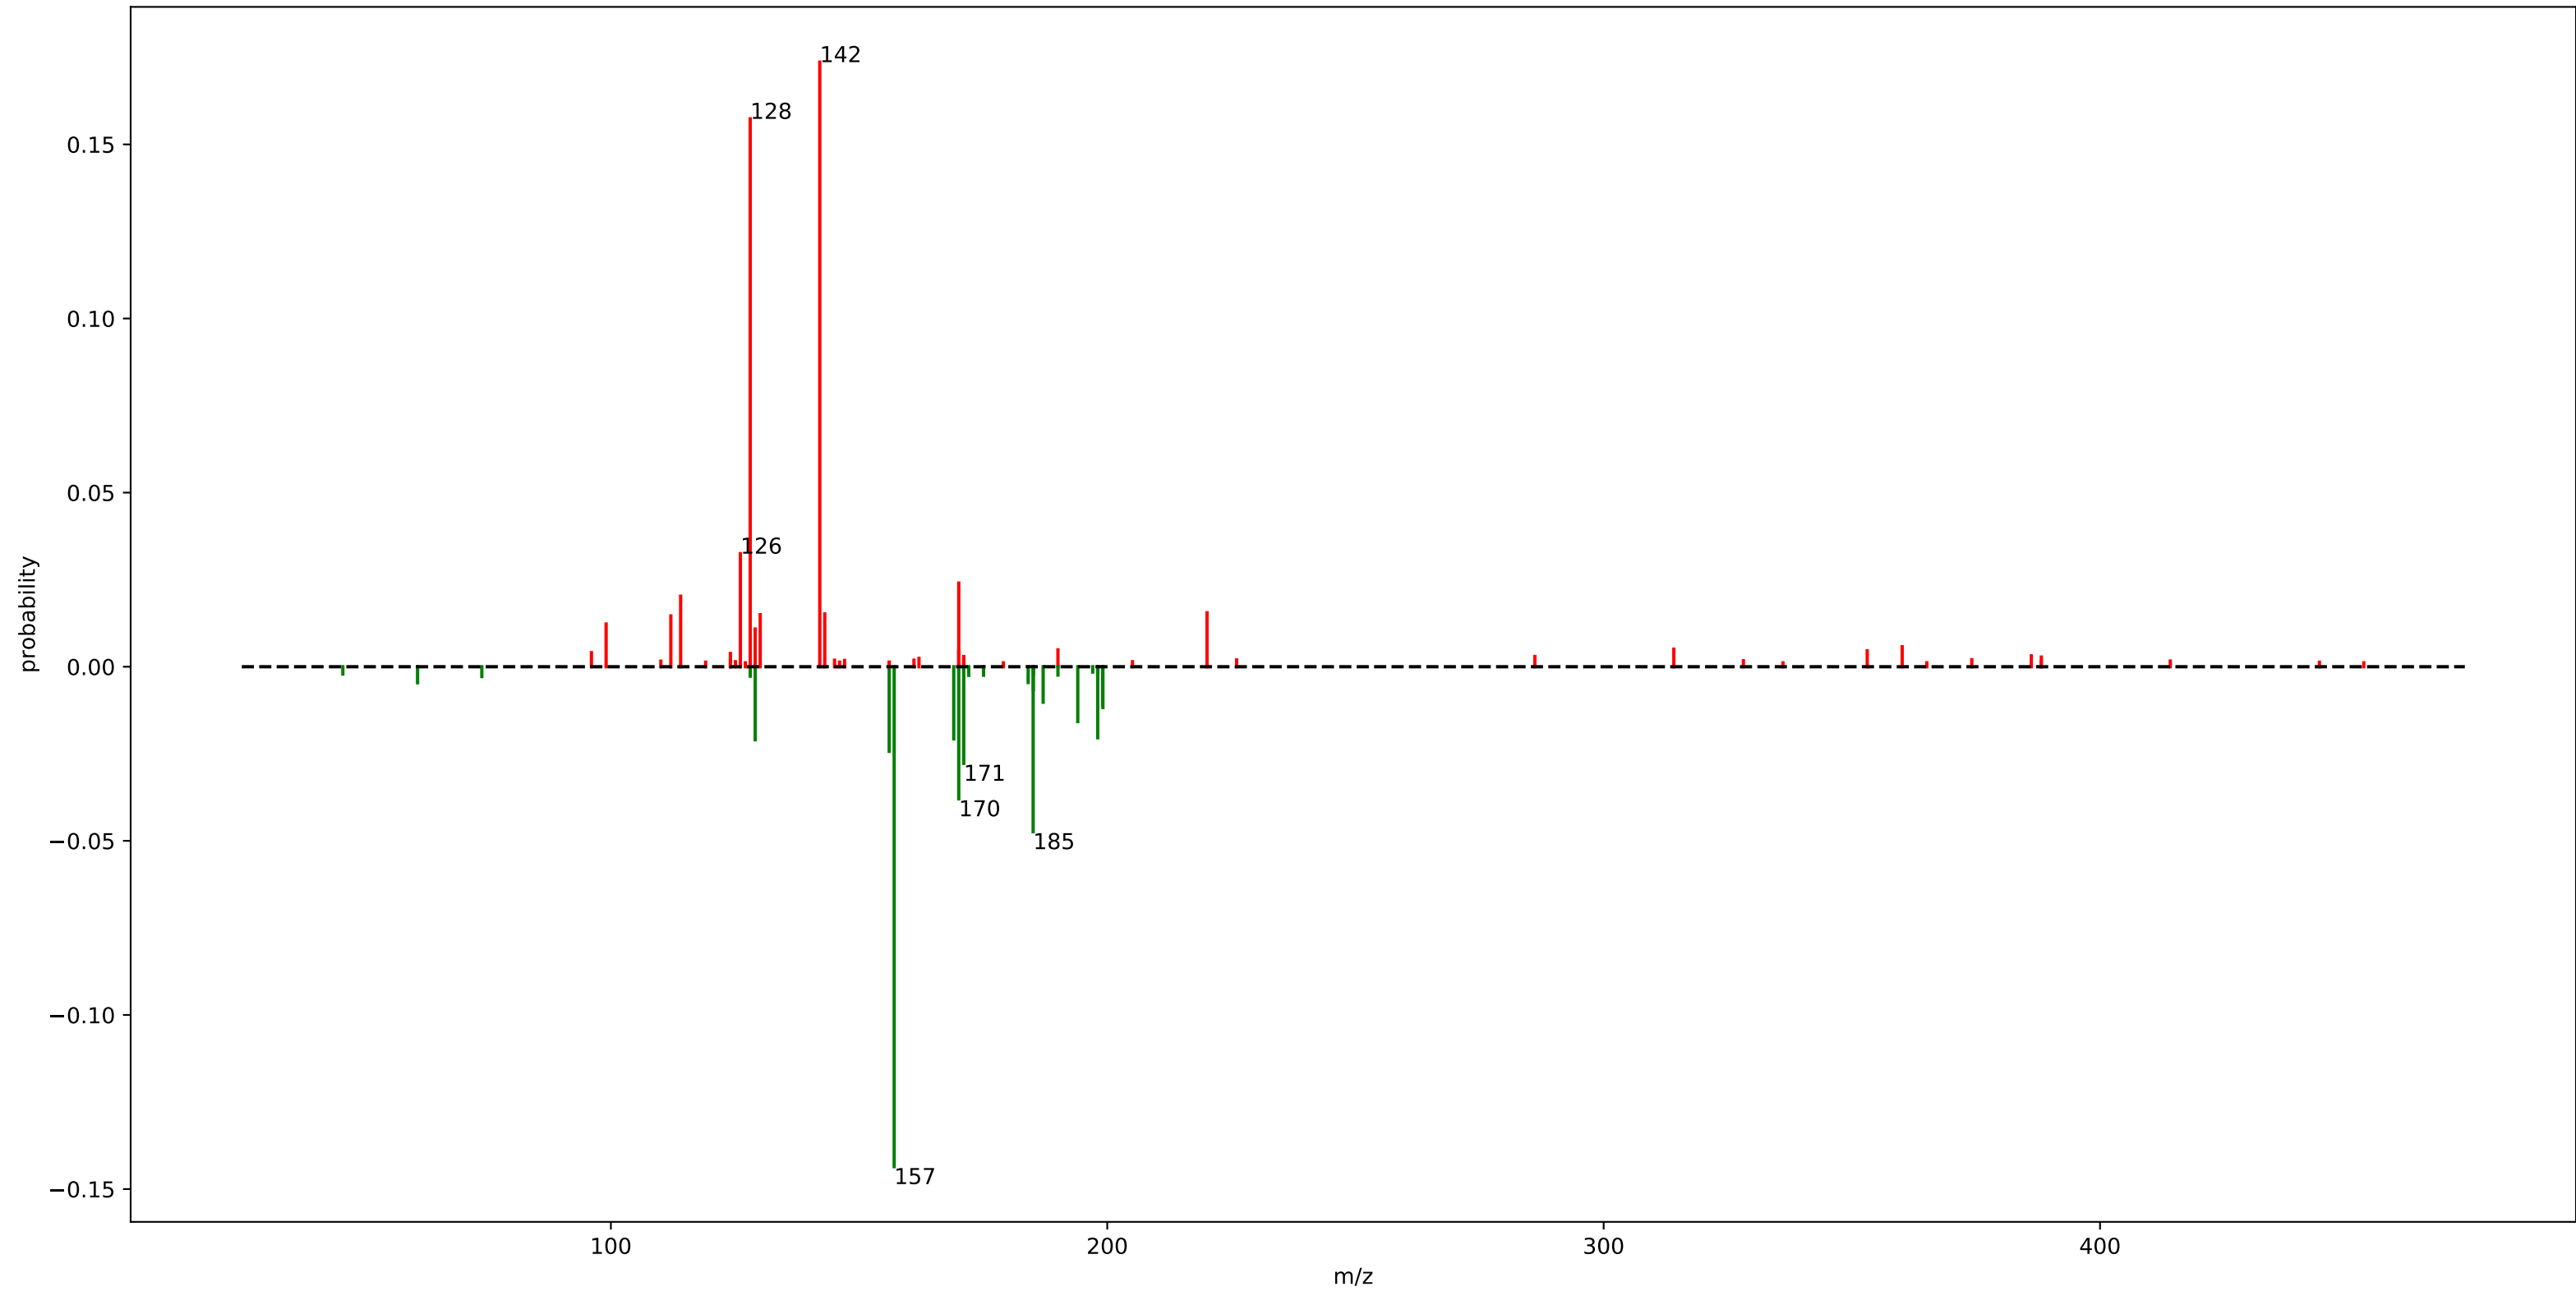

# gnps\_motif\_41.m2m

|                   |        |                   |        |
|-------------------|--------|-------------------|--------|
| fragment_142.0875 | : 0.17 | loss_199.0825     | : 0.01 |
| fragment_128.0725 | : 0.16 | fragment_129.0675 | : 0.01 |
| loss_157.0725     | : 0.14 | loss_187.0825     | : 0.01 |
| loss_185.0675     | : 0.05 | loss_185.1075     | : 0.01 |
| loss_170.0825     | : 0.04 | fragment_360.1425 | : 0.01 |
| fragment_126.0925 | : 0.03 | fragment_314.1375 | : 0.01 |
| loss_171.0875     | : 0.03 |                   |        |
| loss_156.0675     | : 0.02 |                   |        |
| fragment_170.0825 | : 0.02 |                   |        |
| loss_129.0775     | : 0.02 |                   |        |
| loss_169.0725     | : 0.02 |                   |        |
| loss_198.0775     | : 0.02 |                   |        |
| fragment_114.0525 | : 0.02 |                   |        |
| loss_194.0575     | : 0.02 |                   |        |
| fragment_220.0975 | : 0.02 |                   |        |
| fragment_143.0875 | : 0.02 |                   |        |
| fragment_130.0875 | : 0.01 |                   |        |
| fragment_112.0775 | : 0.01 |                   |        |
| fragment_99.0425  | : 0.01 |                   |        |
| loss_199.1225     | : 0.01 |                   |        |

rhamn\_motif\_51.m2m

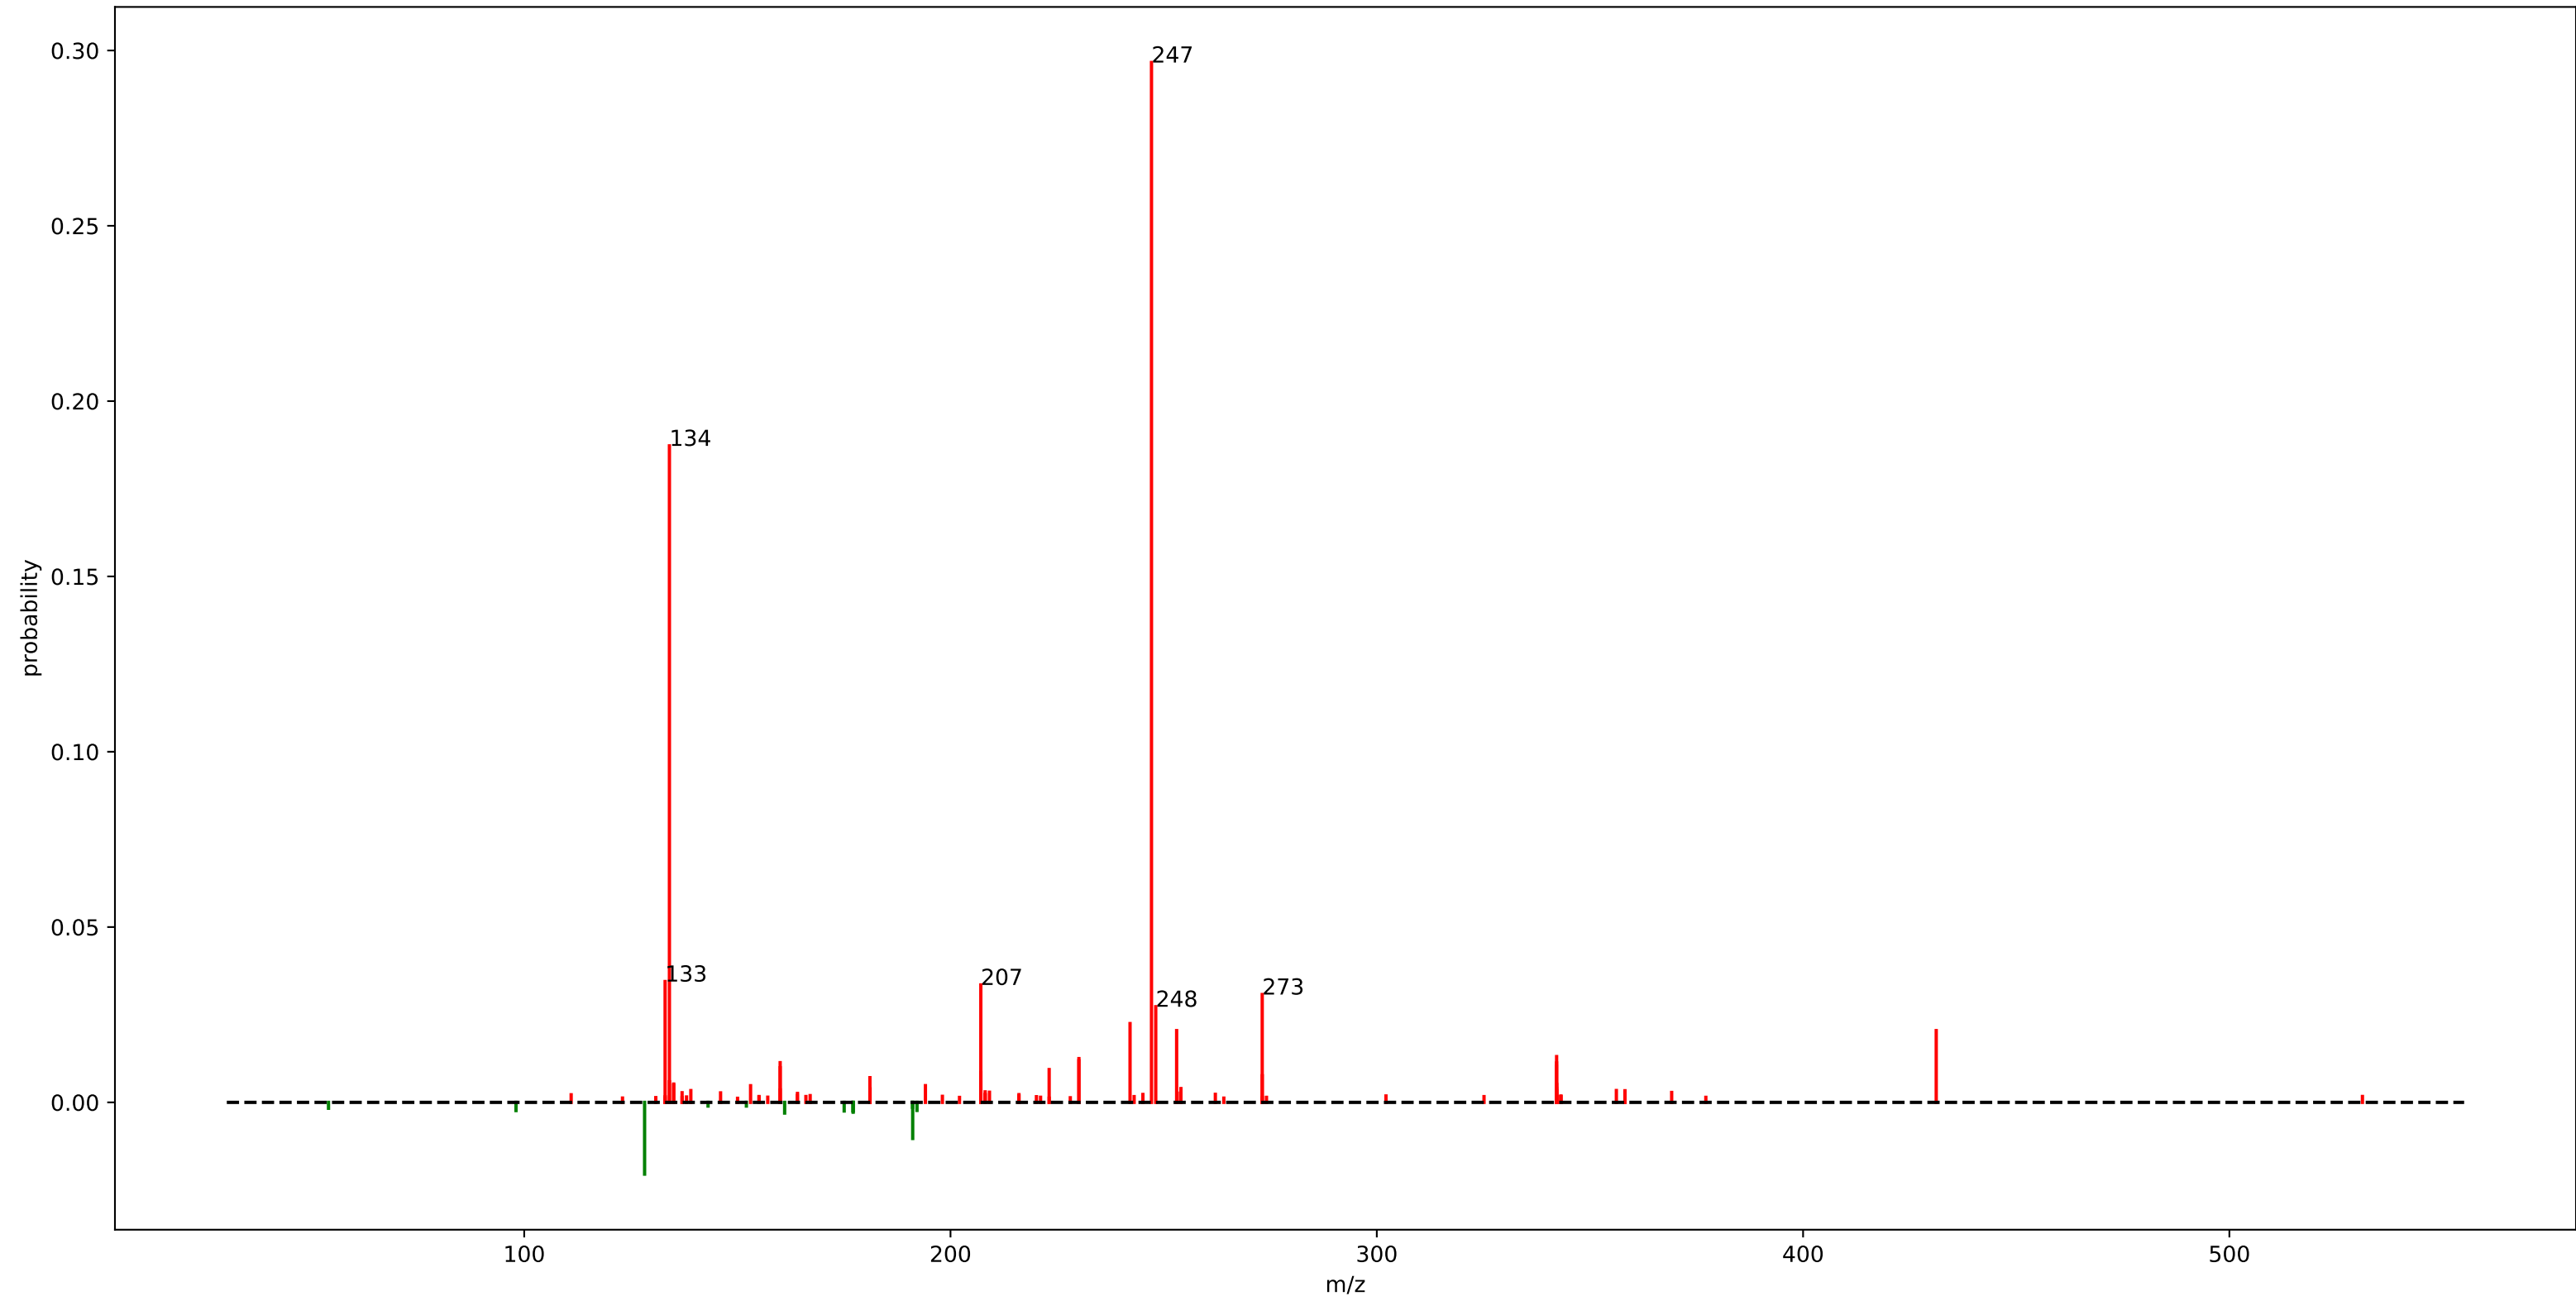

# rhamn\_motif\_51.m2m

|                   |        |                   |        |
|-------------------|--------|-------------------|--------|
| fragment_247.1475 | : 0.30 | fragment_273.1275 | : 0.01 |
| fragment_134.0625 | : 0.19 | fragment_181.0975 | : 0.01 |
| fragment_133.0525 | : 0.03 | fragment_134.0675 | : 0.01 |
| fragment_207.1125 | : 0.03 | fragment_207.1075 | : 0.01 |
| fragment_273.1225 | : 0.03 | fragment_342.1375 | : 0.01 |
| fragment_248.1475 | : 0.03 | fragment_135.0675 | : 0.01 |
| fragment_242.1175 | : 0.02 | fragment_342.1925 | : 0.01 |
| fragment_431.2325 | : 0.02 |                   |        |
| loss_128.2425     | : 0.02 |                   |        |
| fragment_253.0475 | : 0.02 |                   |        |
| fragment_342.1825 | : 0.01 |                   |        |
| fragment_230.1225 | : 0.01 |                   |        |
| fragment_230.1175 | : 0.01 |                   |        |
| fragment_160.0425 | : 0.01 |                   |        |
| fragment_342.1775 | : 0.01 |                   |        |
| fragment_342.1425 | : 0.01 |                   |        |
| loss_191.1325     | : 0.01 |                   |        |
| fragment_160.0375 | : 0.01 |                   |        |
| fragment_223.1425 | : 0.01 |                   |        |
| fragment_207.1175 | : 0.01 |                   |        |

urine\_mass2motif\_212.m2m

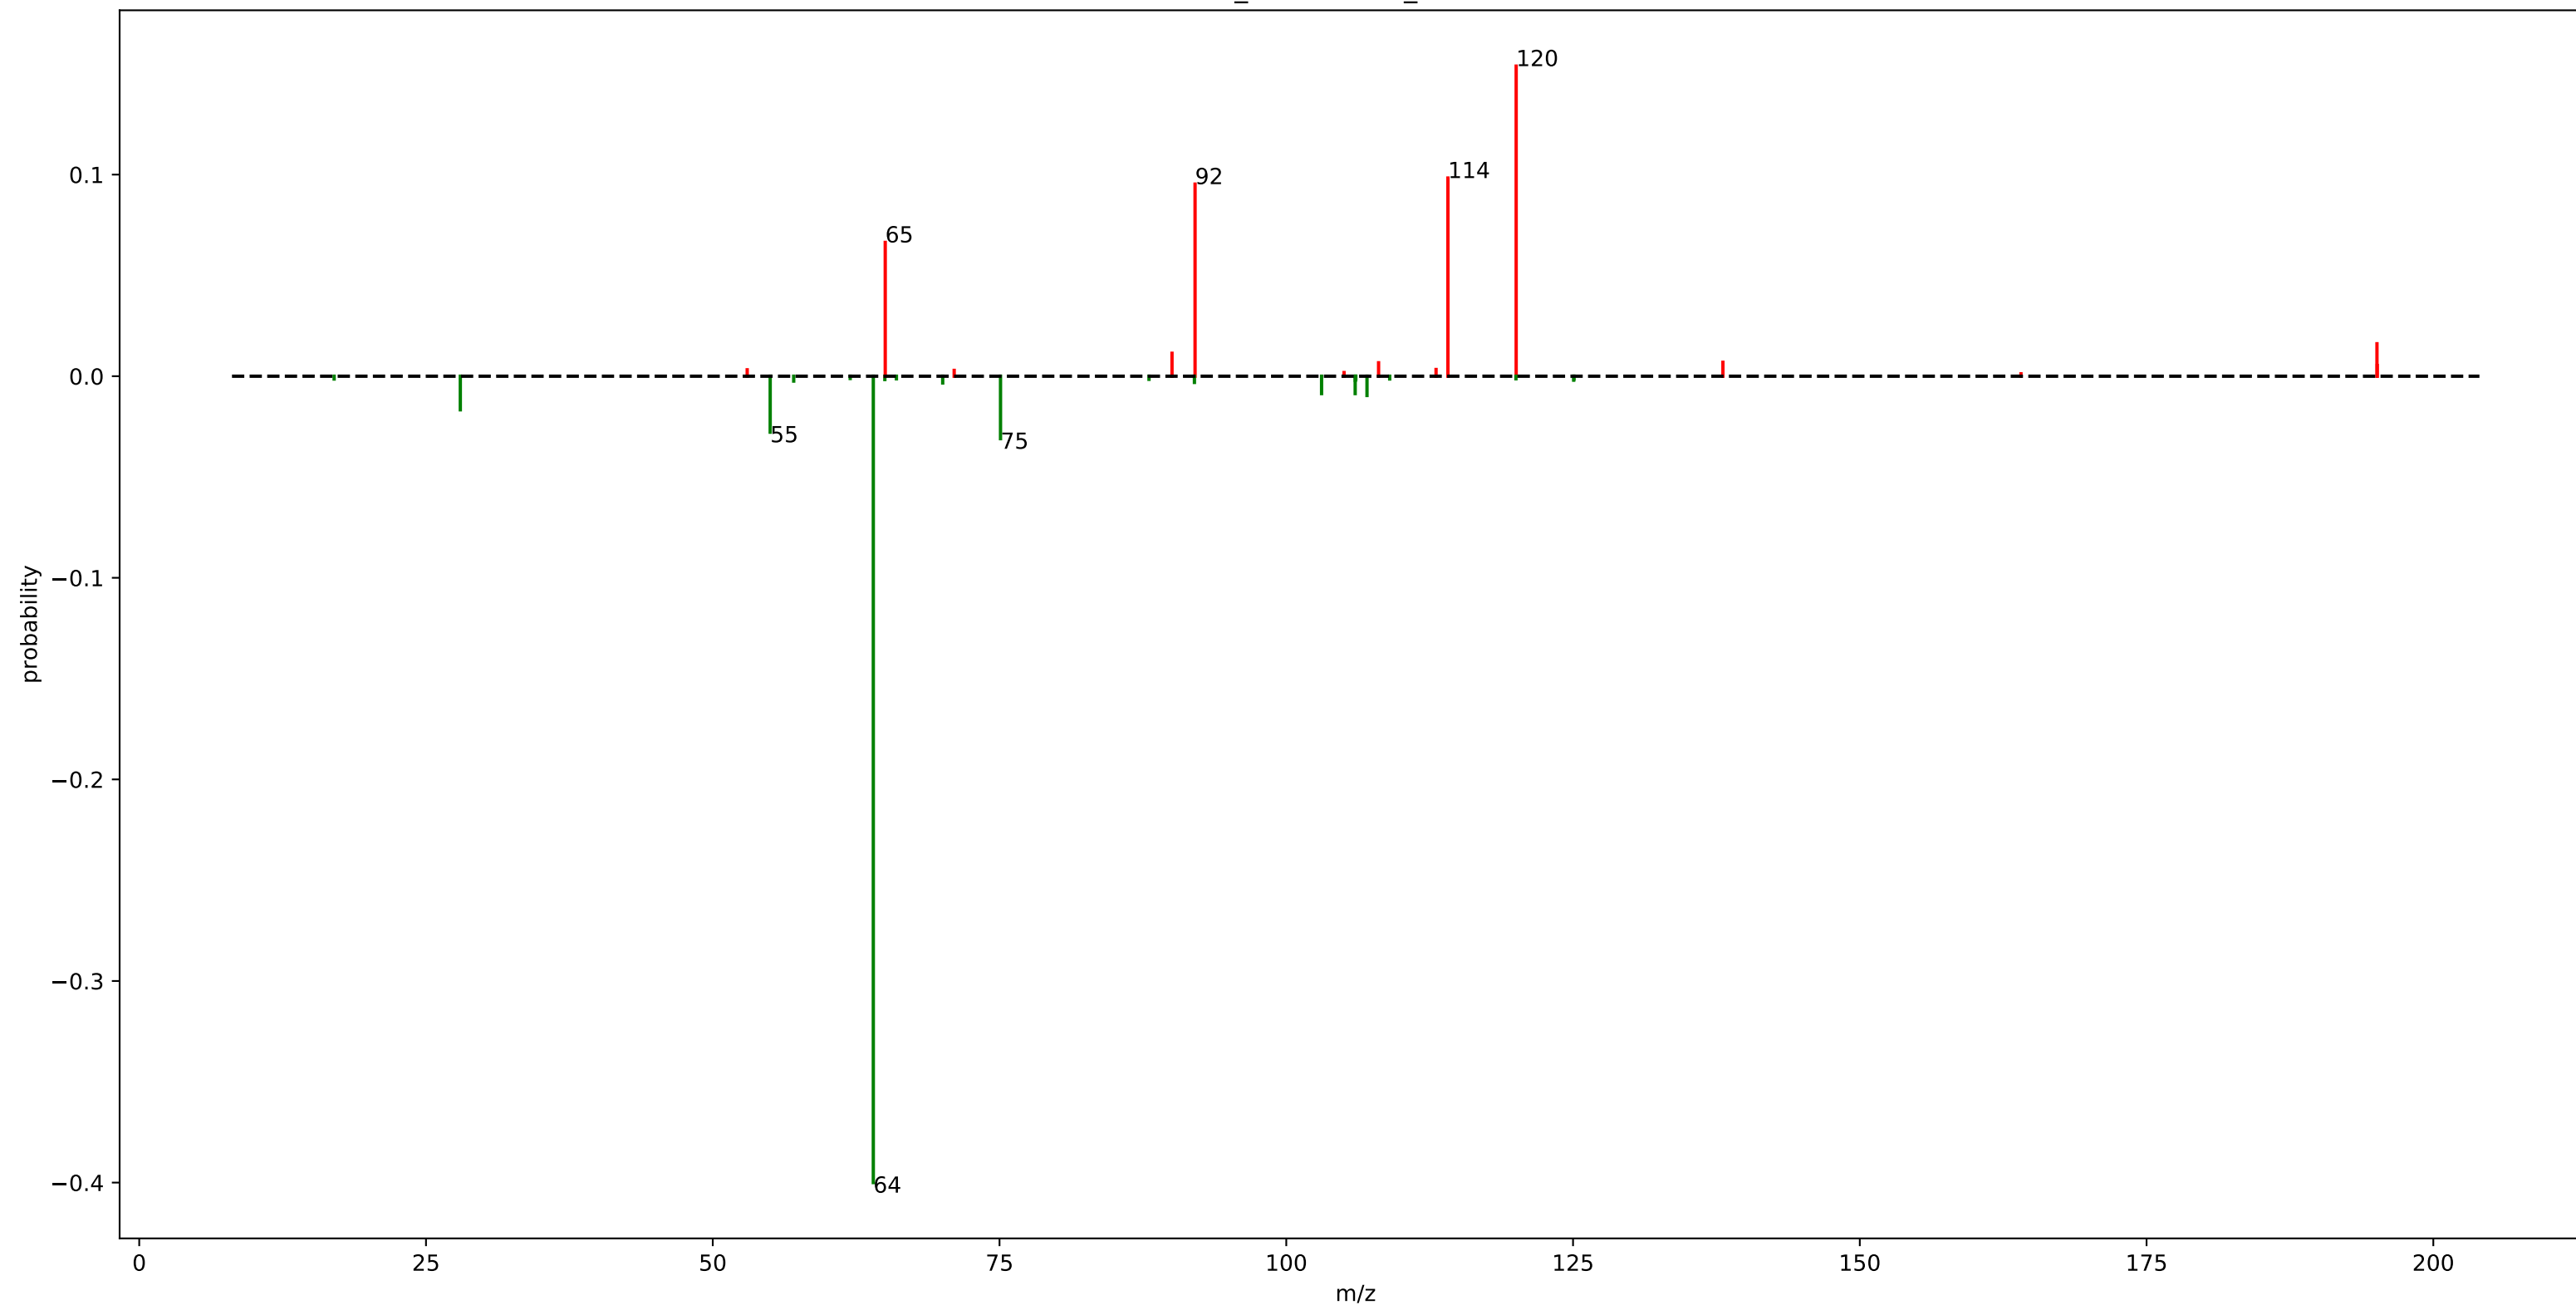

## urine\_mass2motif\_212.m2m

|                   |        |
|-------------------|--------|
| loss_63.9975      | : 0.40 |
| fragment_120.0425 | : 0.15 |
| fragment_114.0925 | : 0.10 |
| fragment_92.0475  | : 0.10 |
| fragment_65.0375  | : 0.07 |
| loss_75.0875      | : 0.03 |
| loss_55.0075      | : 0.03 |
| loss_27.9925      | : 0.02 |
| fragment_195.0875 | : 0.02 |
| fragment_90.0375  | : 0.01 |
| loss_107.0375     | : 0.01 |
| loss_103.0775     | : 0.01 |
| loss_106.0075     | : 0.01 |
| fragment_138.0675 | : 0.01 |
| fragment_108.0475 | : 0.01 |
| fragment_195.1125 | : 0.01 |



gnps\_motif\_19.m2m

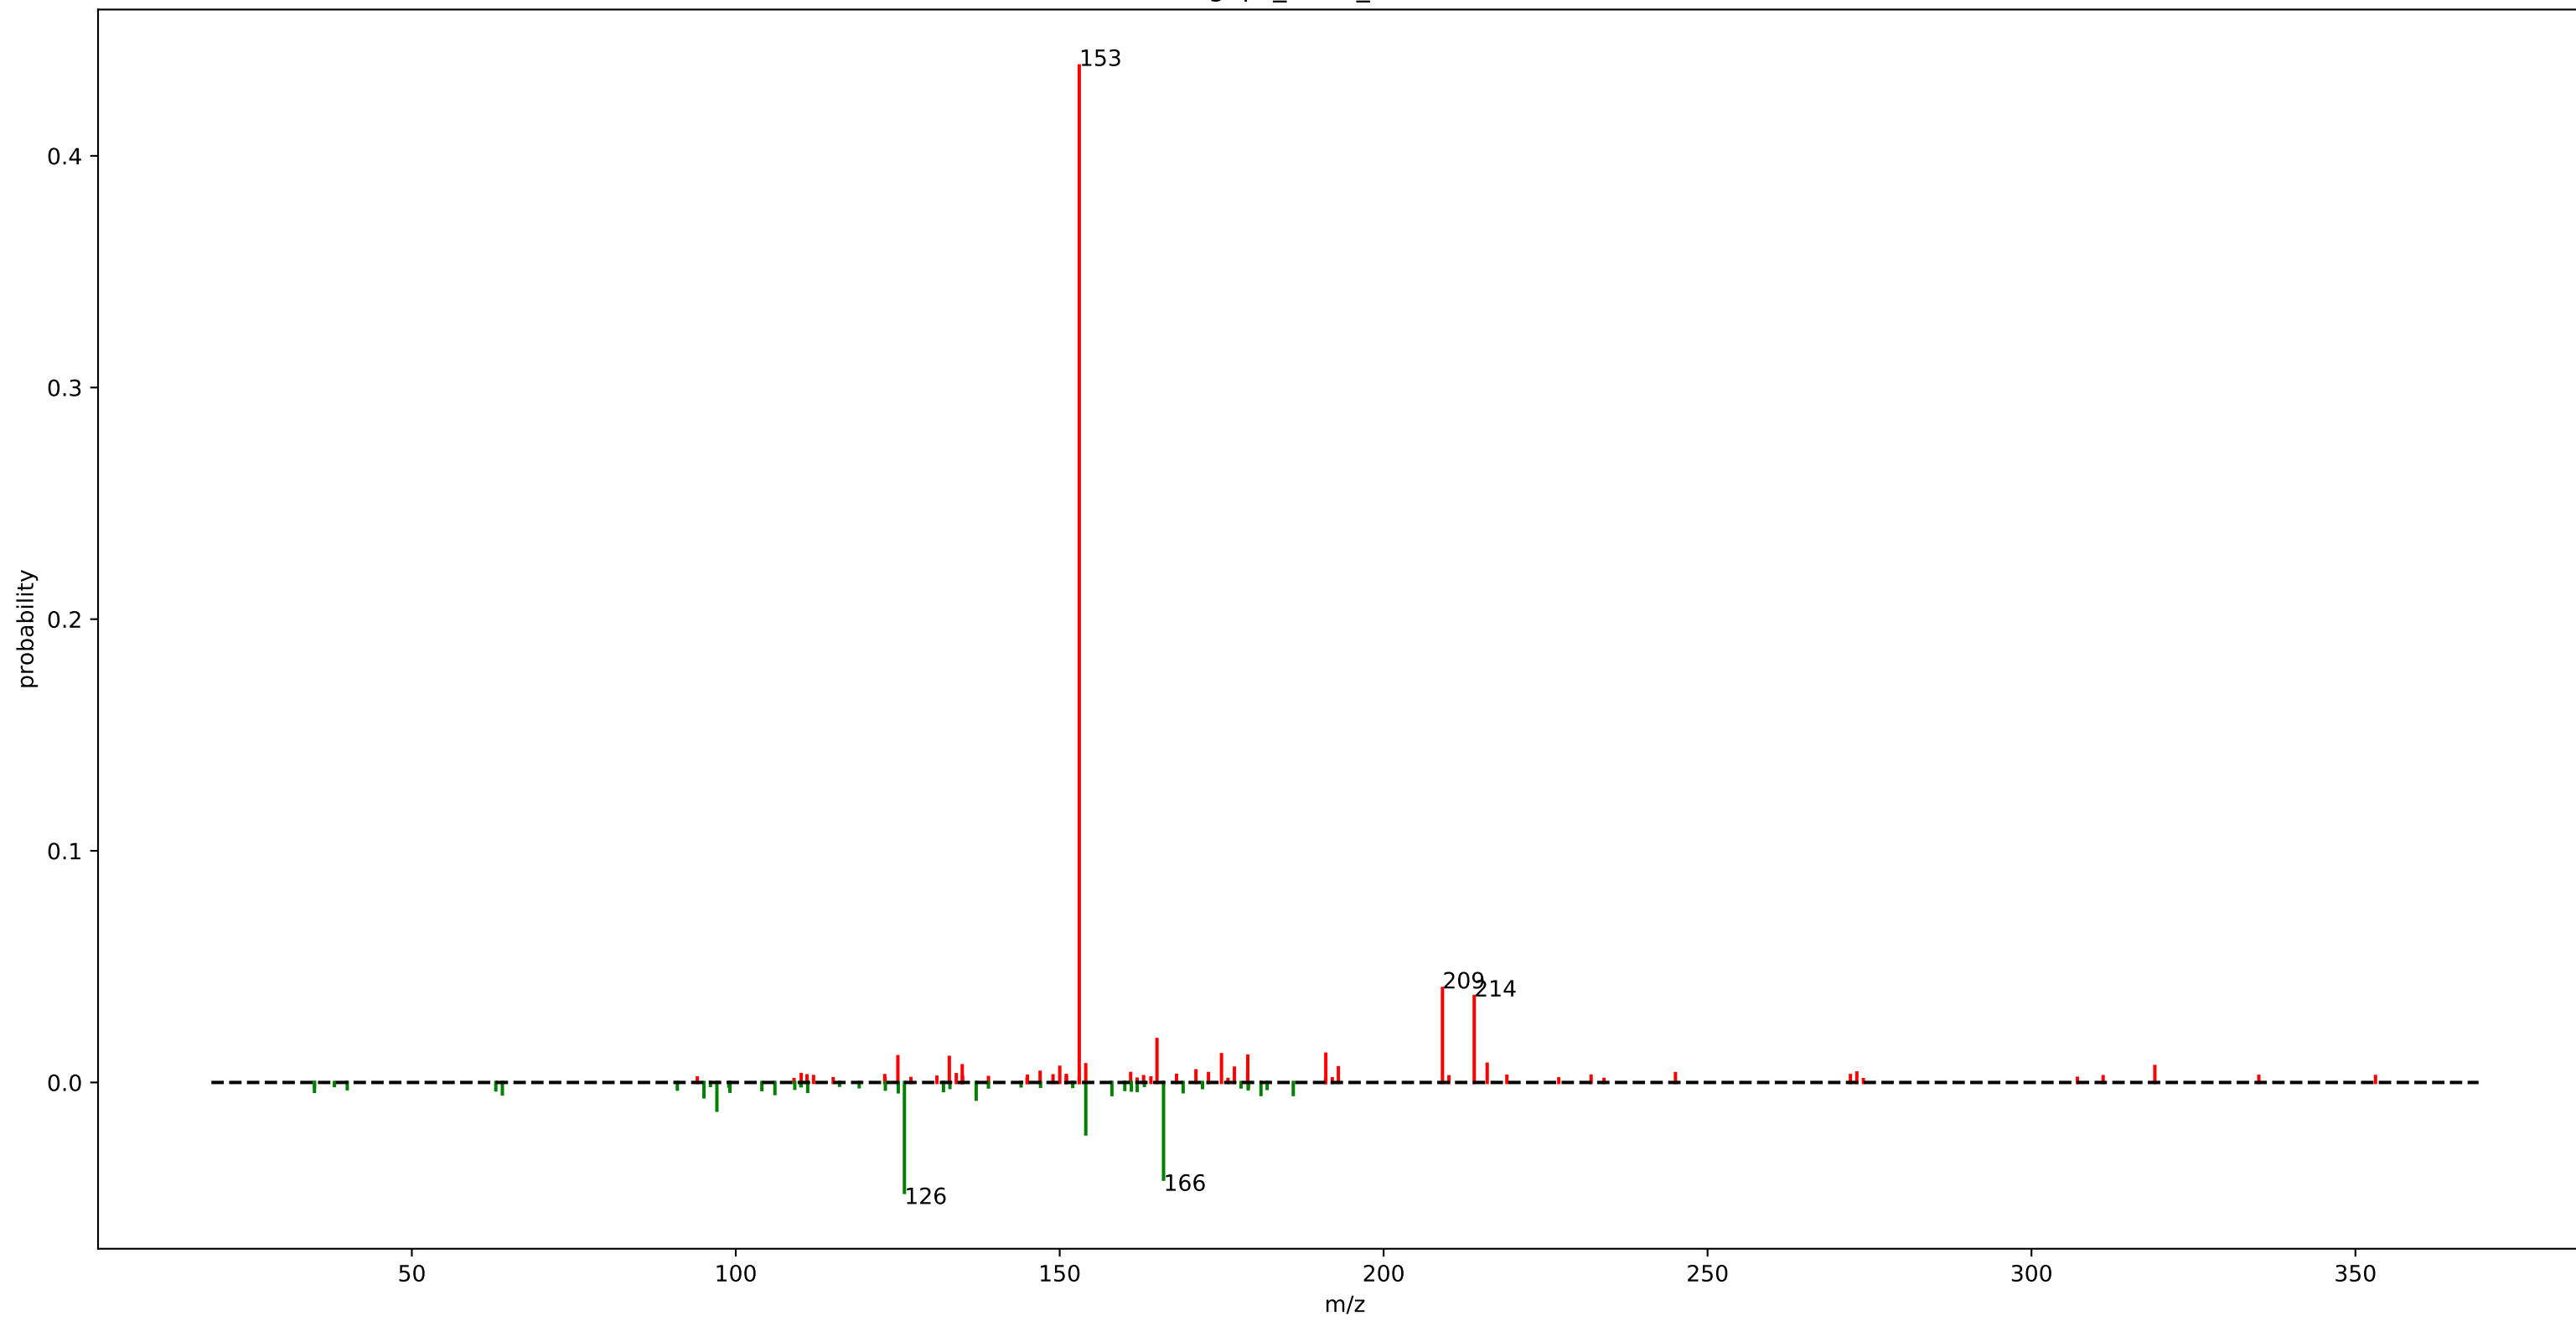

# gnps\_motif\_19.m2m

|                   |        |                   |        |
|-------------------|--------|-------------------|--------|
| fragment_153.0175 | : 0.44 | loss_95.0925      | : 0.01 |
| loss_126.0325     | : 0.05 | fragment_176.9675 | : 0.01 |
| loss_166.0275     | : 0.04 | loss_158.0575     | : 0.01 |
| fragment_209.0825 | : 0.04 | loss_186.0525     | : 0.01 |
| fragment_213.9825 | : 0.04 | loss_181.0725     | : 0.01 |
| loss_154.0275     | : 0.02 | fragment_171.0275 | : 0.01 |
| fragment_165.0175 | : 0.02 |                   |        |
| fragment_191.0725 | : 0.01 |                   |        |
| fragment_174.9725 | : 0.01 |                   |        |
| loss_97.0875      | : 0.01 |                   |        |
| fragment_179.0325 | : 0.01 |                   |        |
| fragment_125.0225 | : 0.01 |                   |        |
| fragment_132.9625 | : 0.01 |                   |        |
| fragment_215.9875 | : 0.01 |                   |        |
| fragment_154.0225 | : 0.01 |                   |        |
| fragment_134.9575 | : 0.01 |                   |        |
| loss_137.1075     | : 0.01 |                   |        |
| fragment_319.0425 | : 0.01 |                   |        |
| fragment_150.0125 | : 0.01 |                   |        |
| fragment_193.0125 | : 0.01 |                   |        |

euphorbia\_motif\_149.m2m

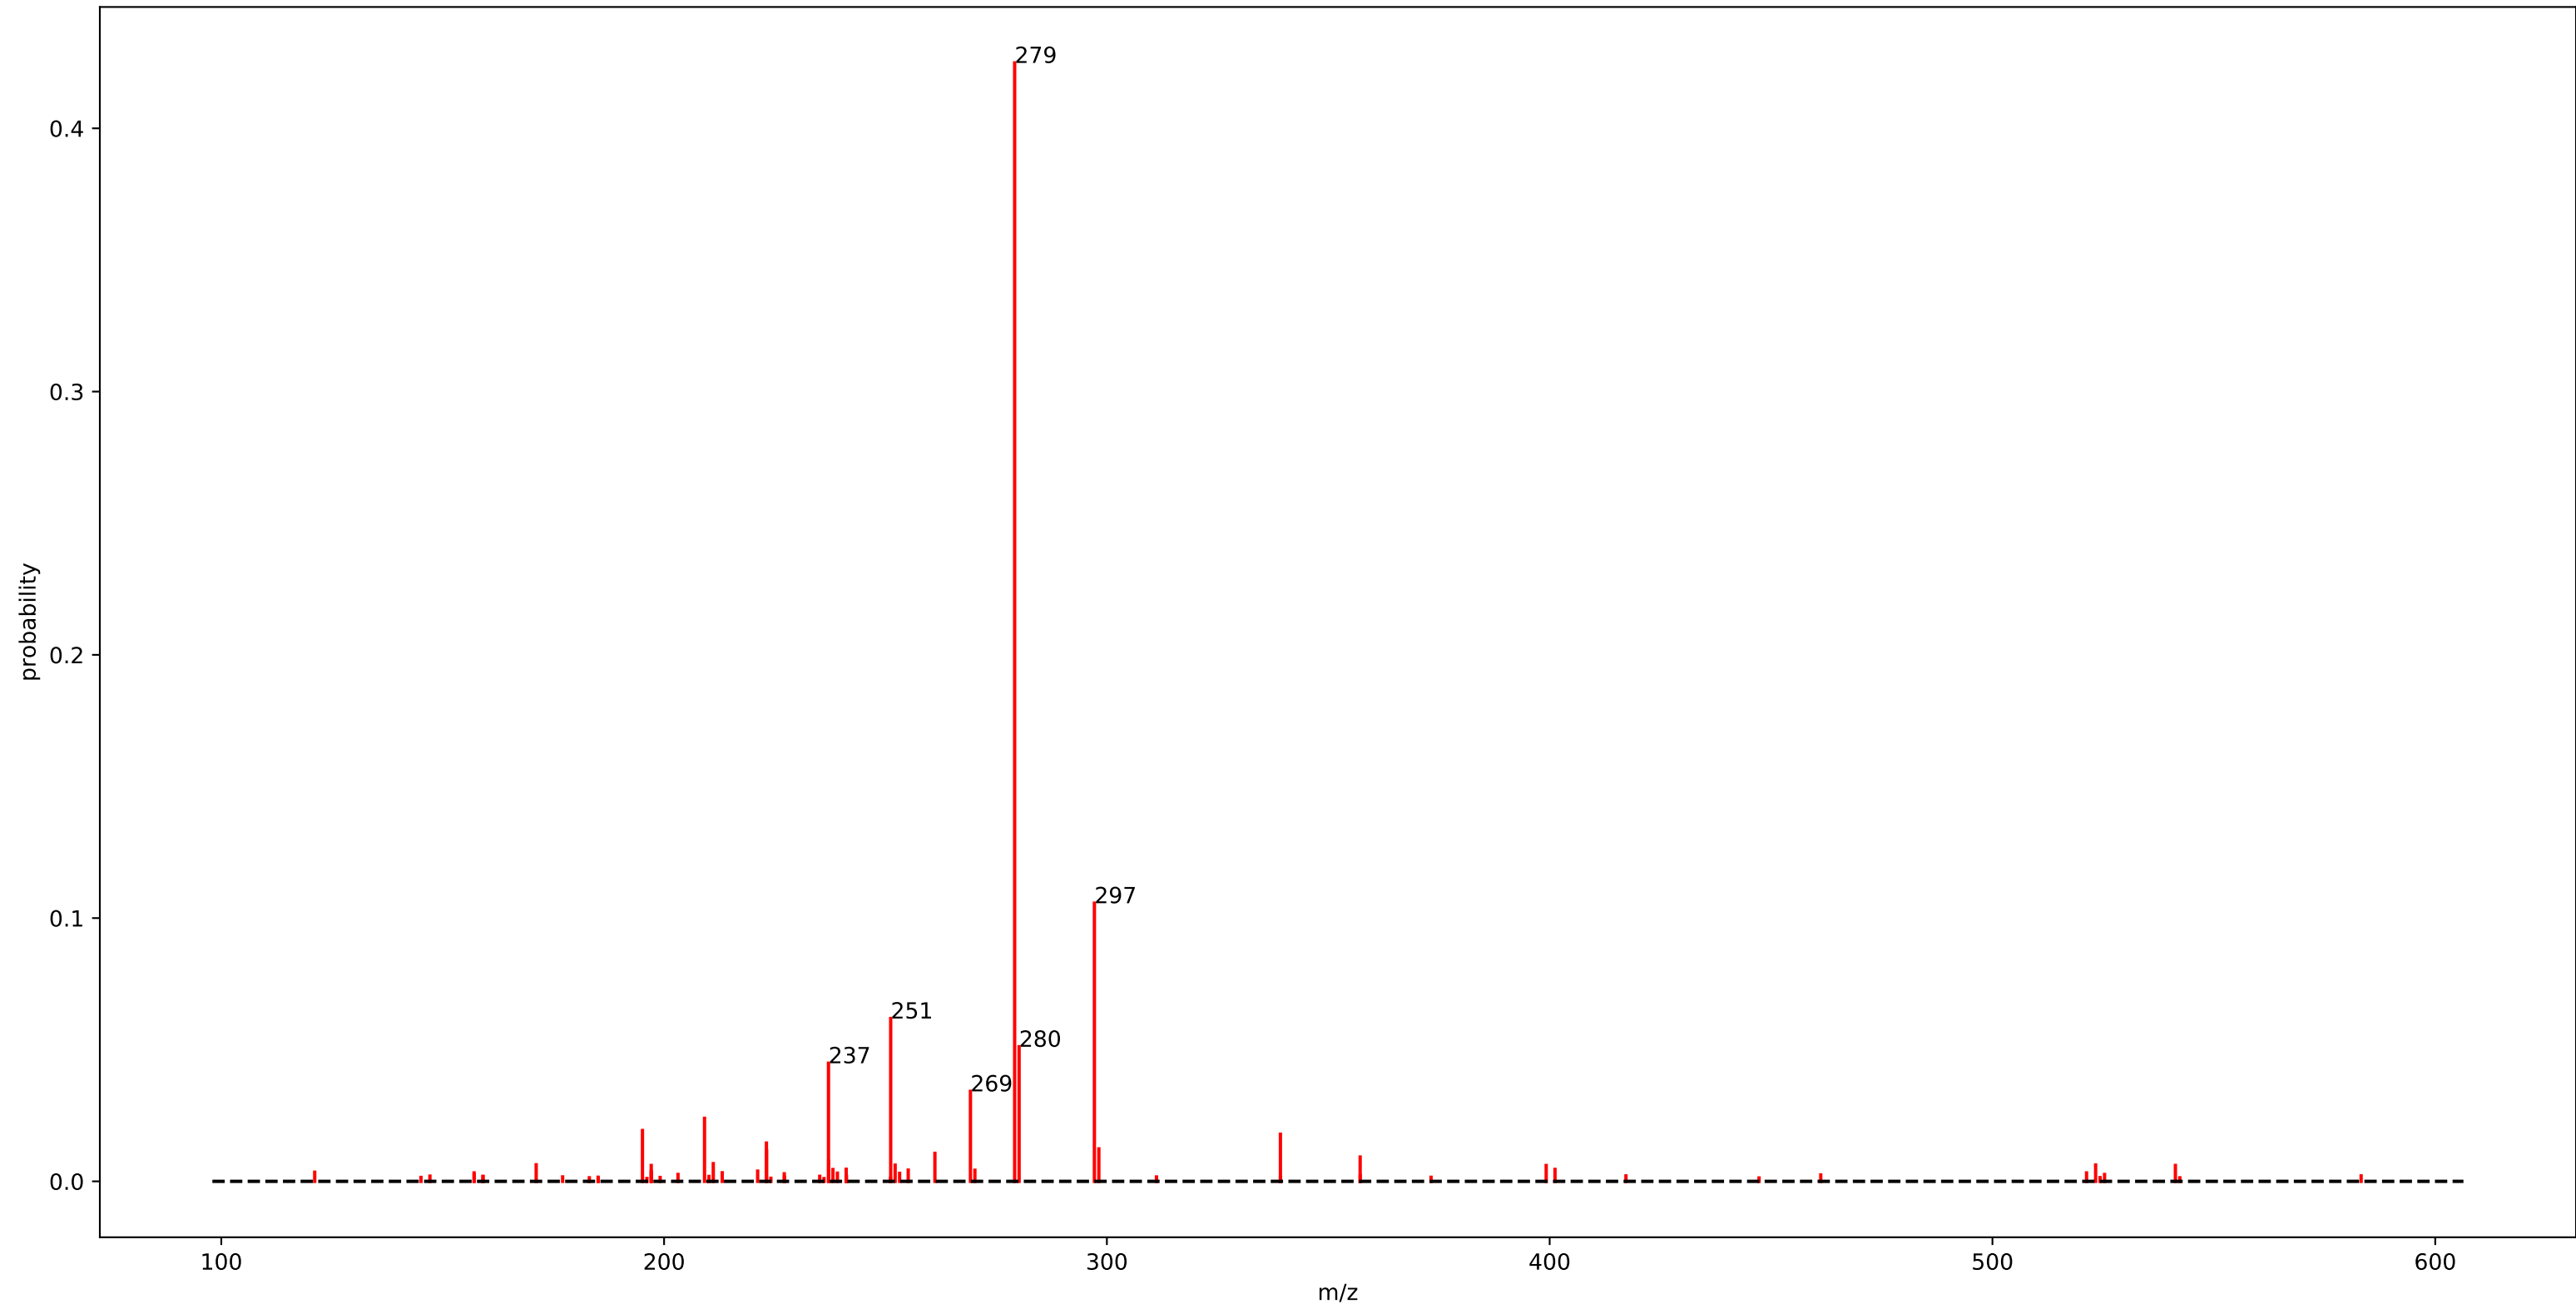

# euphorbia\_motif\_149.m2m

|                   |        |                   |        |
|-------------------|--------|-------------------|--------|
| fragment_279.1725 | : 0.42 | fragment_197.0975 | : 0.01 |
| fragment_297.1825 | : 0.11 | fragment_399.2175 | : 0.01 |
| fragment_251.1775 | : 0.06 |                   |        |
| fragment_280.1775 | : 0.05 |                   |        |
| fragment_237.1275 | : 0.04 |                   |        |
| fragment_269.1875 | : 0.03 |                   |        |
| fragment_209.1325 | : 0.02 |                   |        |
| fragment_195.1175 | : 0.02 |                   |        |
| fragment_339.1925 | : 0.02 |                   |        |
| fragment_223.1125 | : 0.01 |                   |        |
| fragment_298.1875 | : 0.01 |                   |        |
| fragment_223.1475 | : 0.01 |                   |        |
| fragment_261.1625 | : 0.01 |                   |        |
| fragment_357.2025 | : 0.01 |                   |        |
| fragment_237.1625 | : 0.01 |                   |        |
| fragment_211.1125 | : 0.01 |                   |        |
| fragment_171.1175 | : 0.01 |                   |        |
| fragment_523.3025 | : 0.01 |                   |        |
| fragment_252.1825 | : 0.01 |                   |        |
| fragment_541.3175 | : 0.01 |                   |        |

motif\_409

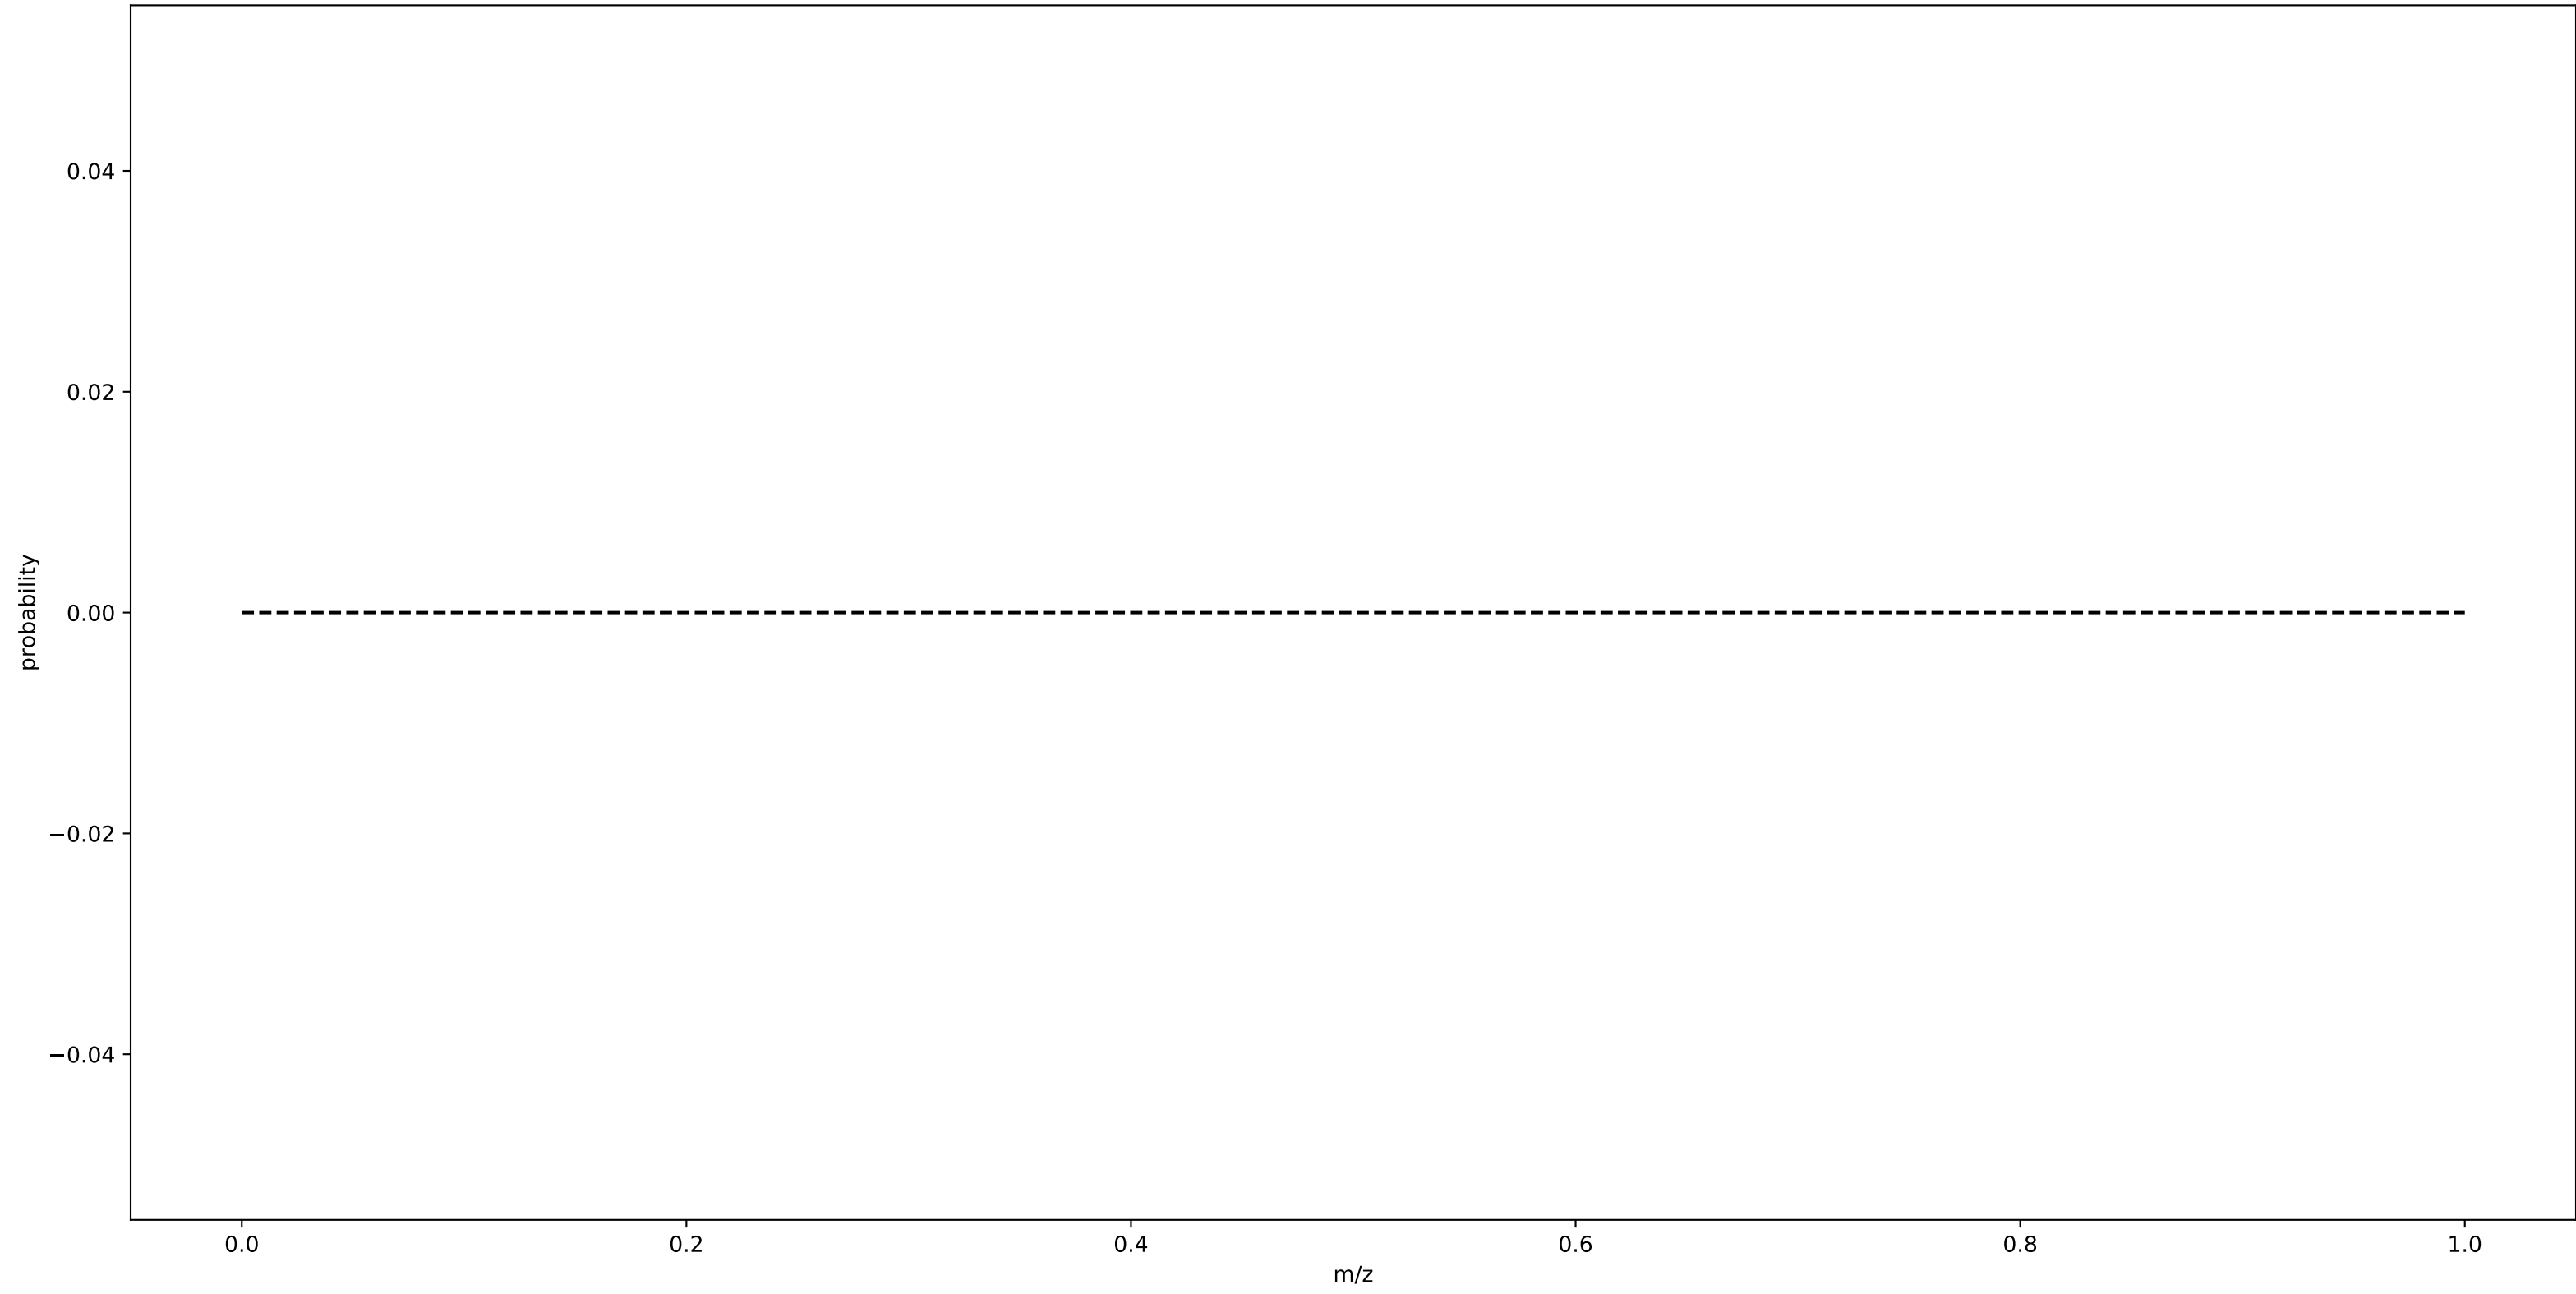

motif\_409

euphorbia\_motif\_255.m2m

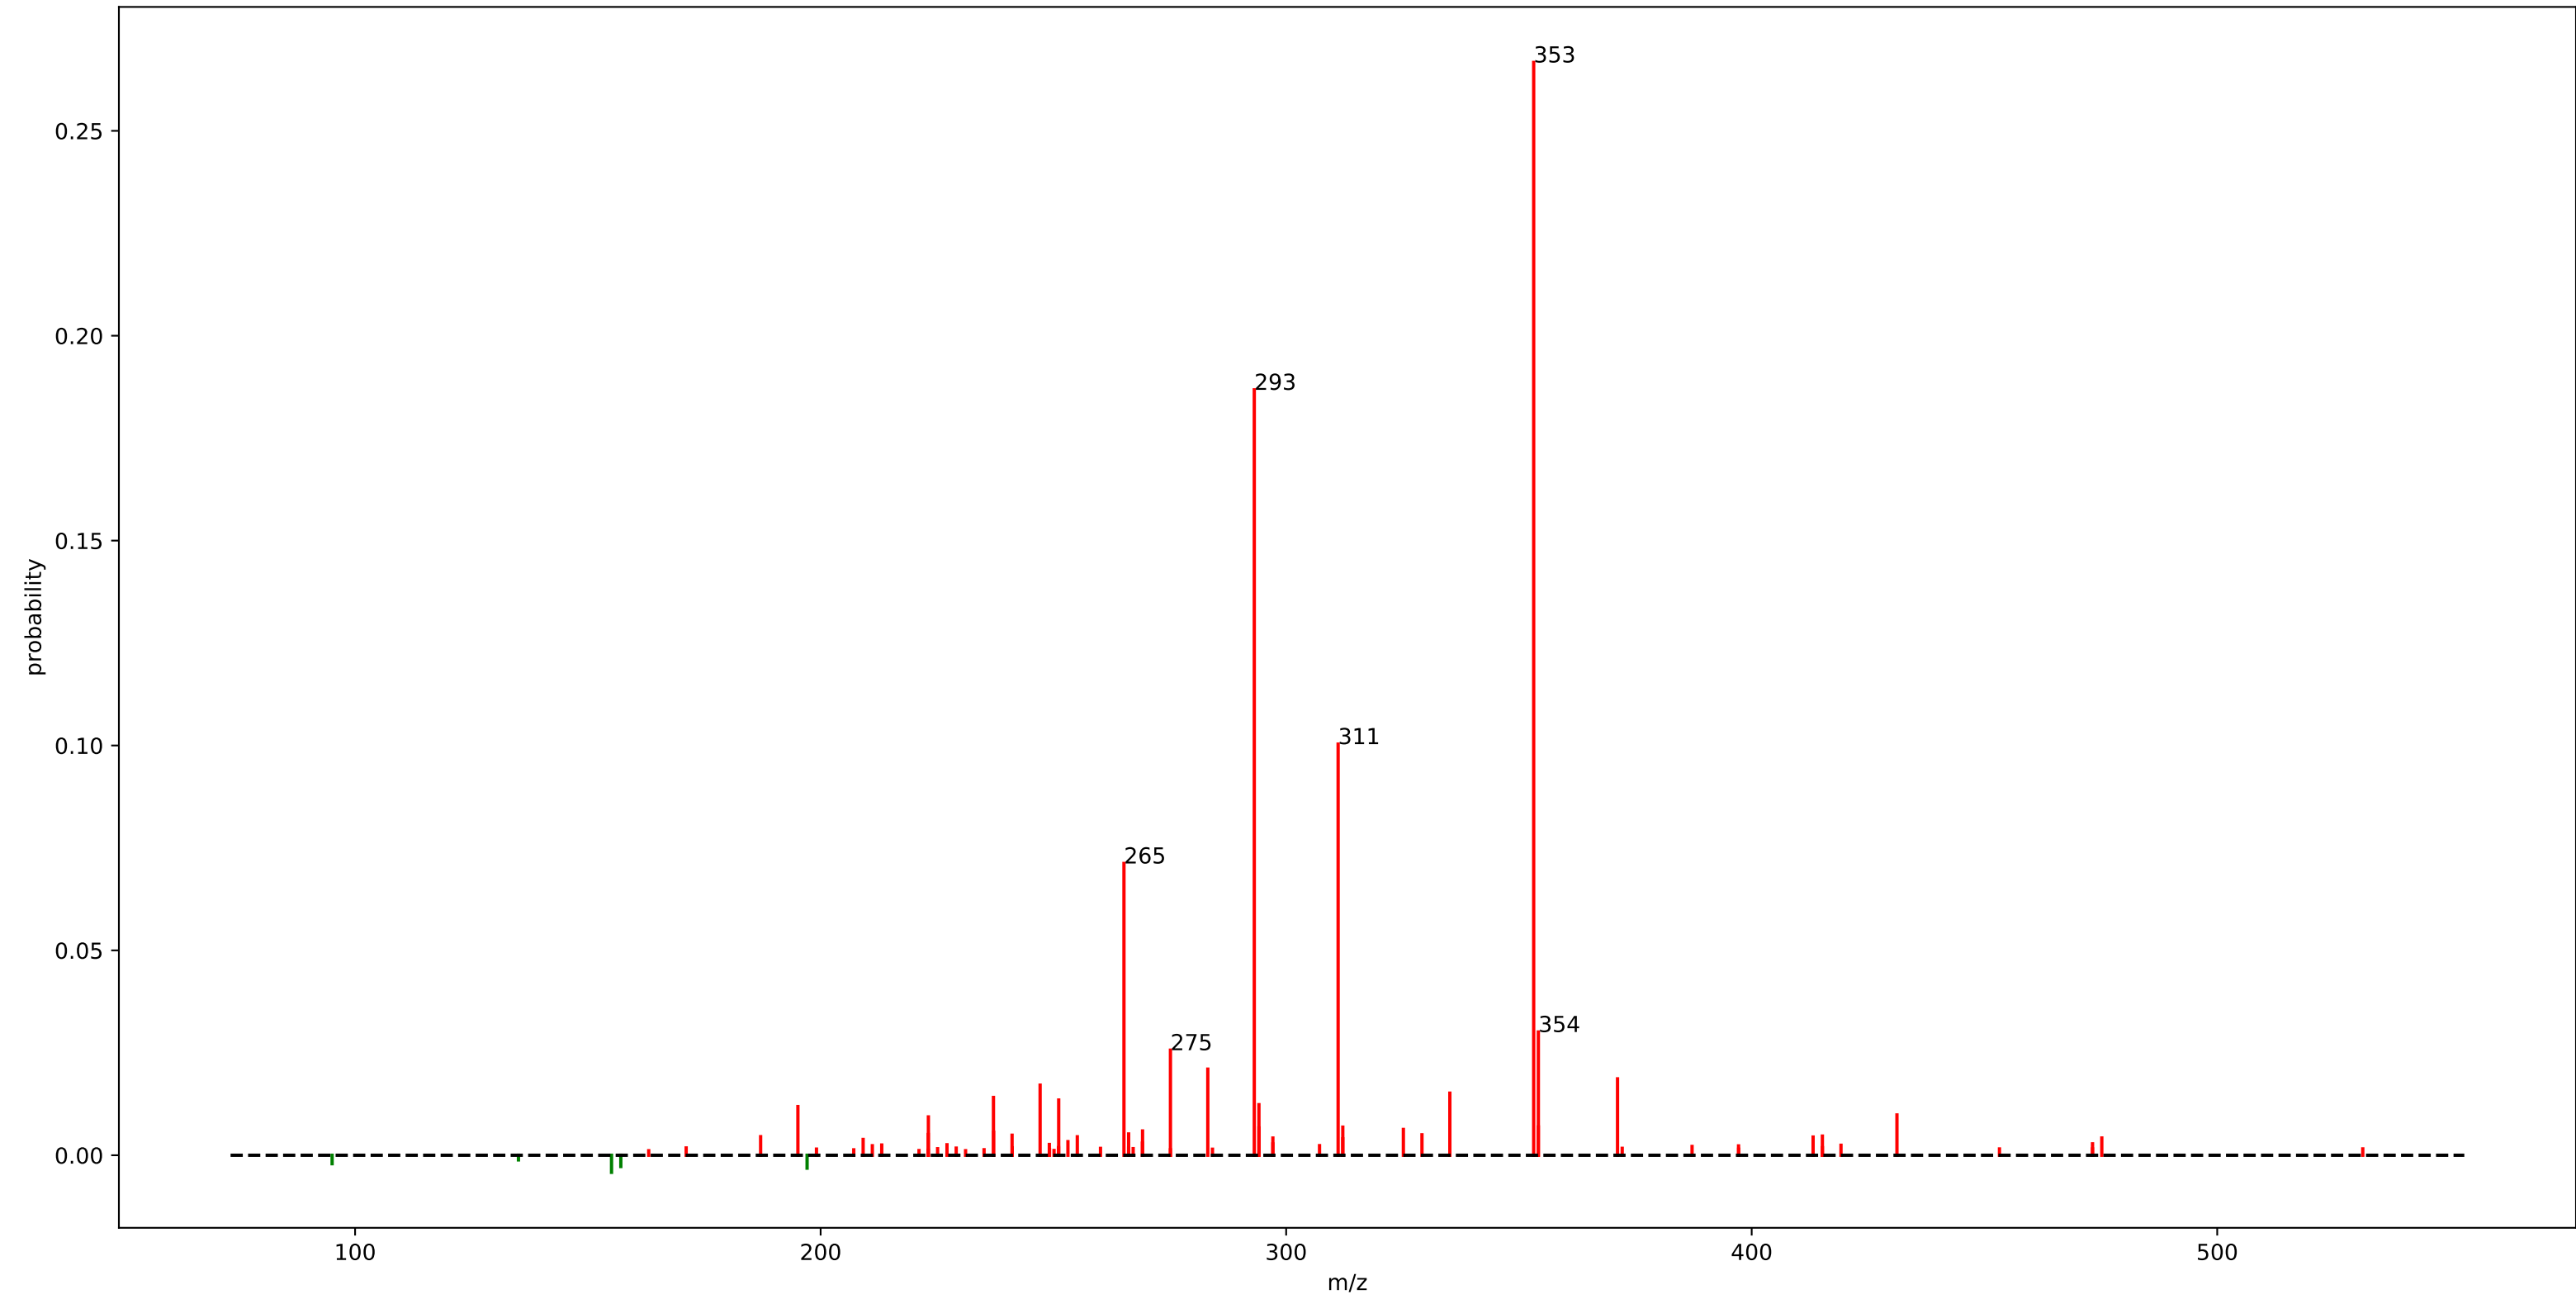

# euphorbia\_motif\_255.m2m

|                   |        |                   |        |
|-------------------|--------|-------------------|--------|
| fragment_353.1725 | : 0.27 | fragment_269.1525 | : 0.01 |
| fragment_293.1525 | : 0.19 | fragment_237.1625 | : 0.01 |
| fragment_311.1625 | : 0.10 | fragment_266.1625 | : 0.01 |
| fragment_265.1575 | : 0.07 | fragment_223.1125 | : 0.01 |
| fragment_354.1775 | : 0.03 |                   |        |
| fragment_275.1425 | : 0.03 |                   |        |
| fragment_283.1675 | : 0.02 |                   |        |
| fragment_371.1825 | : 0.02 |                   |        |
| fragment_247.1475 | : 0.02 |                   |        |
| fragment_335.1625 | : 0.02 |                   |        |
| fragment_237.1275 | : 0.01 |                   |        |
| fragment_251.1425 | : 0.01 |                   |        |
| fragment_294.1525 | : 0.01 |                   |        |
| fragment_195.1175 | : 0.01 |                   |        |
| fragment_431.2025 | : 0.01 |                   |        |
| fragment_223.1475 | : 0.01 |                   |        |
| fragment_354.1725 | : 0.01 |                   |        |
| fragment_312.1675 | : 0.01 |                   |        |
| fragment_294.1575 | : 0.01 |                   |        |
| fragment_325.1775 | : 0.01 |                   |        |



euphorbia\_motif\_335.m2m

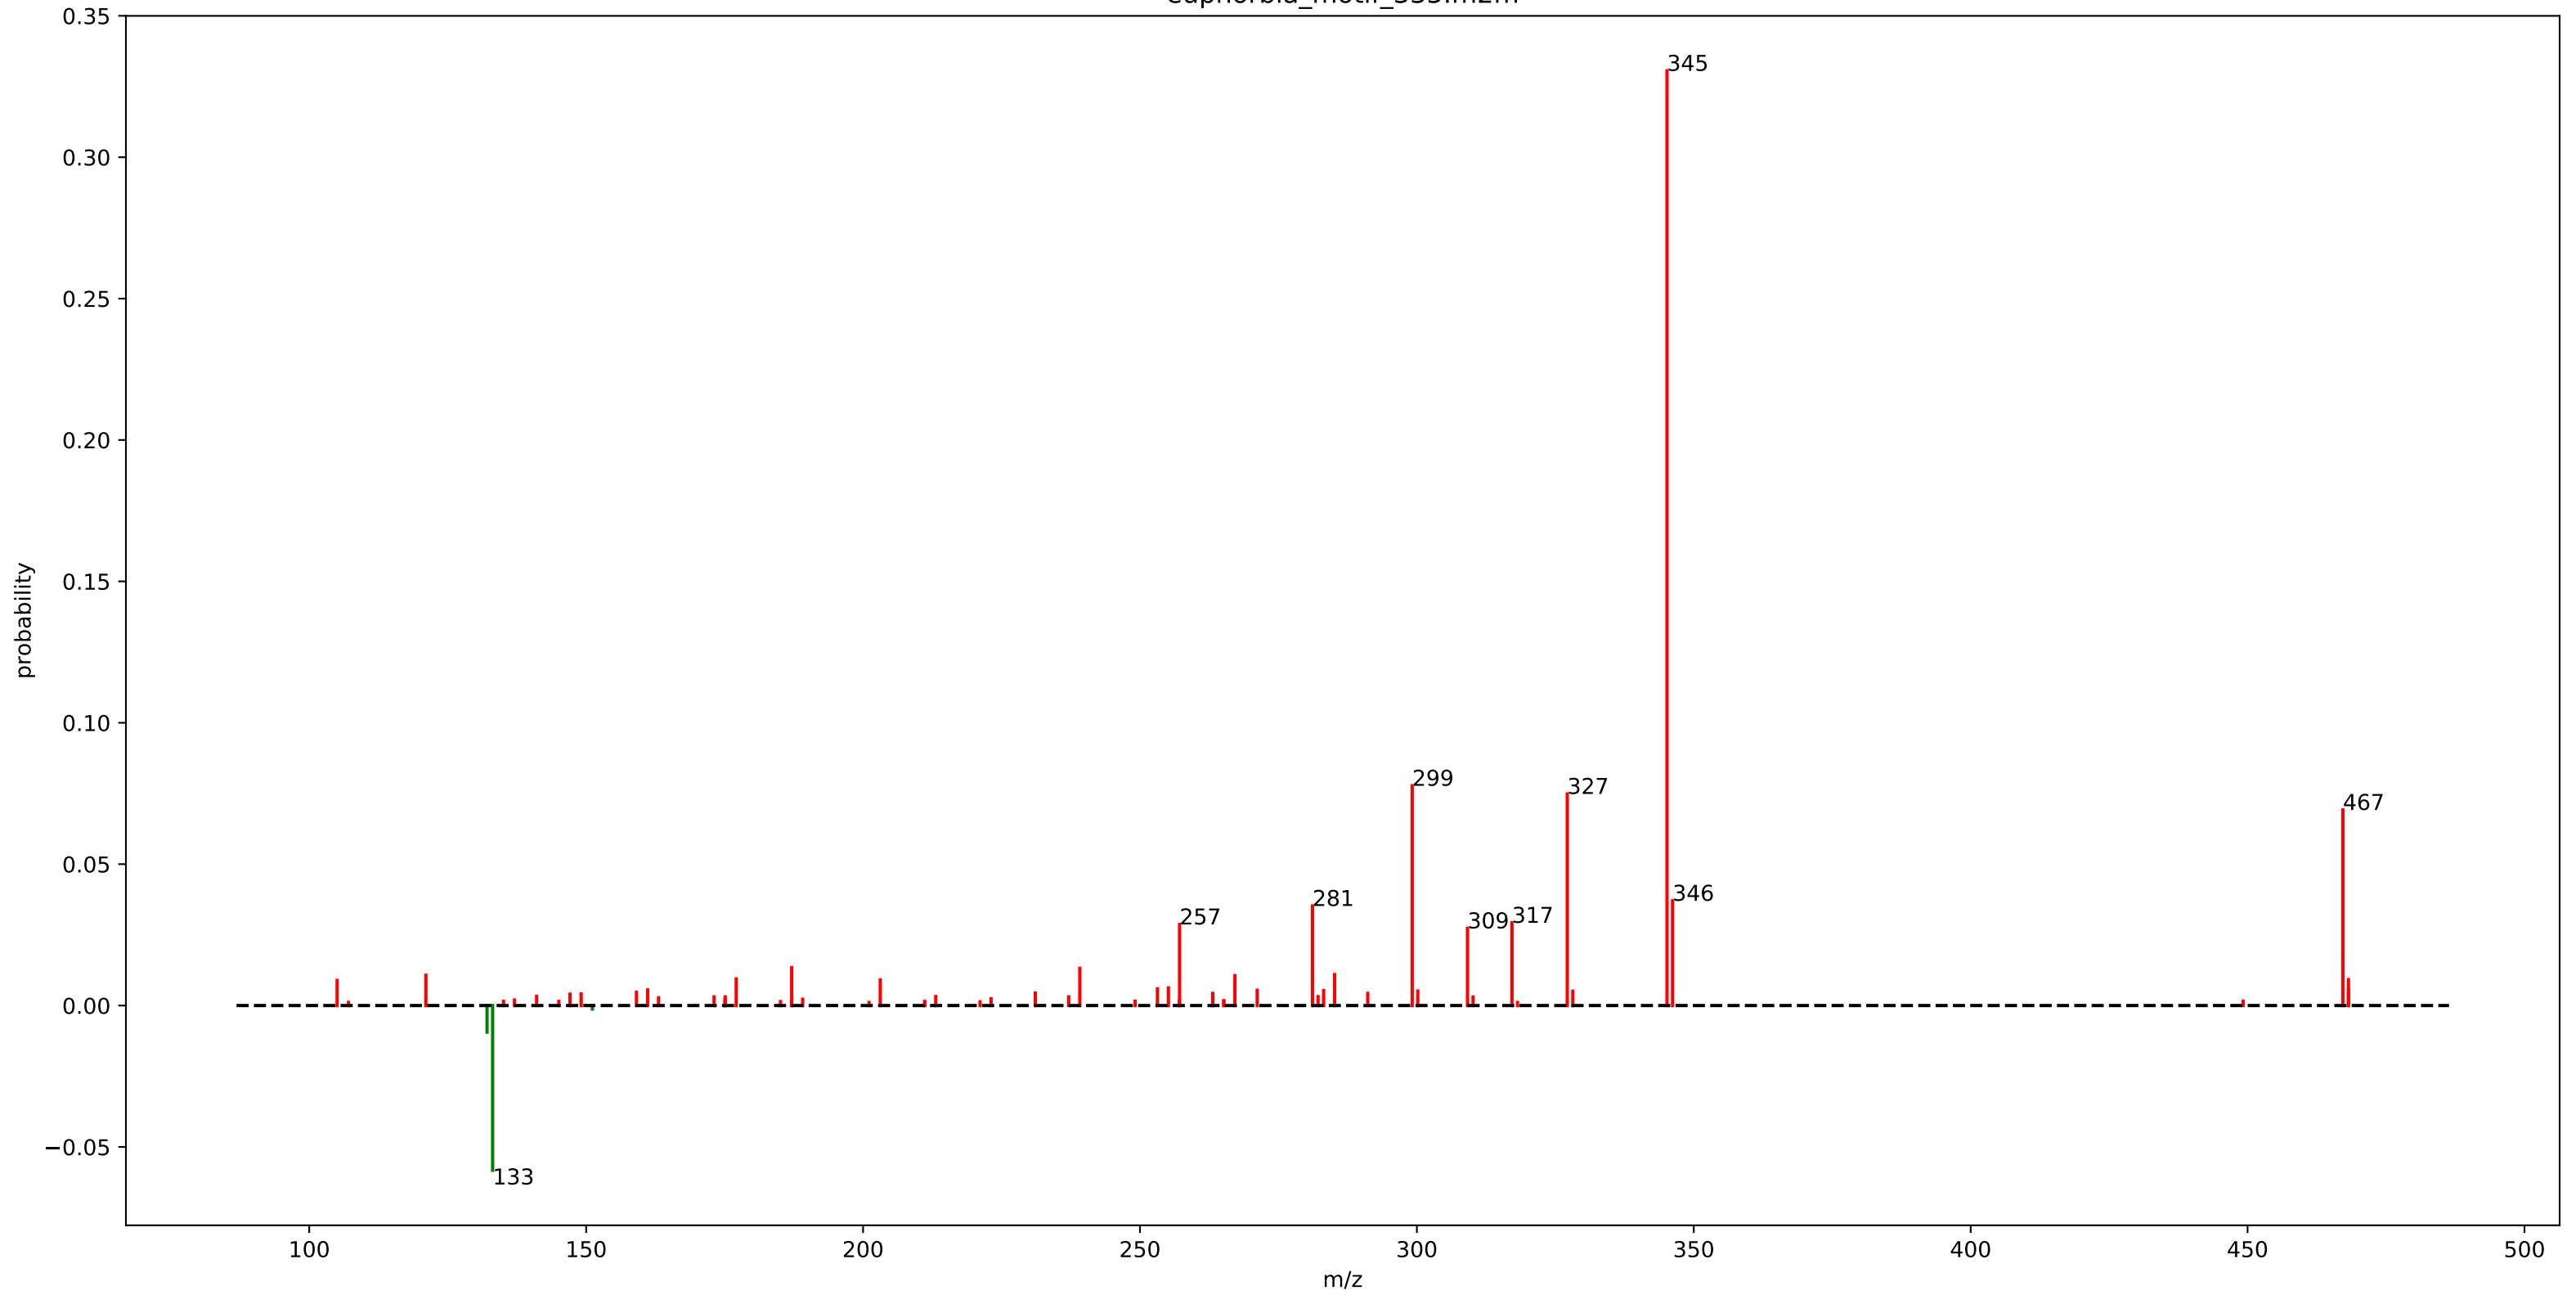

# euphorbia\_motif\_335.m2m

|                   |        |                   |        |
|-------------------|--------|-------------------|--------|
| fragment_345.1675 | : 0.33 | fragment_255.1375 | : 0.01 |
| fragment_299.1625 | : 0.08 | fragment_253.1575 | : 0.01 |
| fragment_327.1575 | : 0.07 | fragment_161.0975 | : 0.01 |
| fragment_467.2075 | : 0.07 | fragment_468.2075 | : 0.01 |
| loss_133.1125     | : 0.06 | fragment_271.1675 | : 0.01 |
| fragment_346.1725 | : 0.04 | fragment_283.1675 | : 0.01 |
| fragment_281.1525 | : 0.04 | fragment_300.1675 | : 0.01 |
| fragment_317.1725 | : 0.03 | fragment_328.1575 | : 0.01 |
| fragment_257.1525 | : 0.03 |                   |        |
| fragment_309.1475 | : 0.03 |                   |        |
| fragment_187.1125 | : 0.01 |                   |        |
| fragment_239.1425 | : 0.01 |                   |        |
| fragment_285.1475 | : 0.01 |                   |        |
| fragment_121.0625 | : 0.01 |                   |        |
| fragment_267.1375 | : 0.01 |                   |        |
| fragment_177.0925 | : 0.01 |                   |        |
| loss_132.1075     | : 0.01 |                   |        |
| fragment_468.2125 | : 0.01 |                   |        |
| fragment_203.1075 | : 0.01 |                   |        |
| fragment_105.0325 | : 0.01 |                   |        |

gnps\_motif\_2.m2m

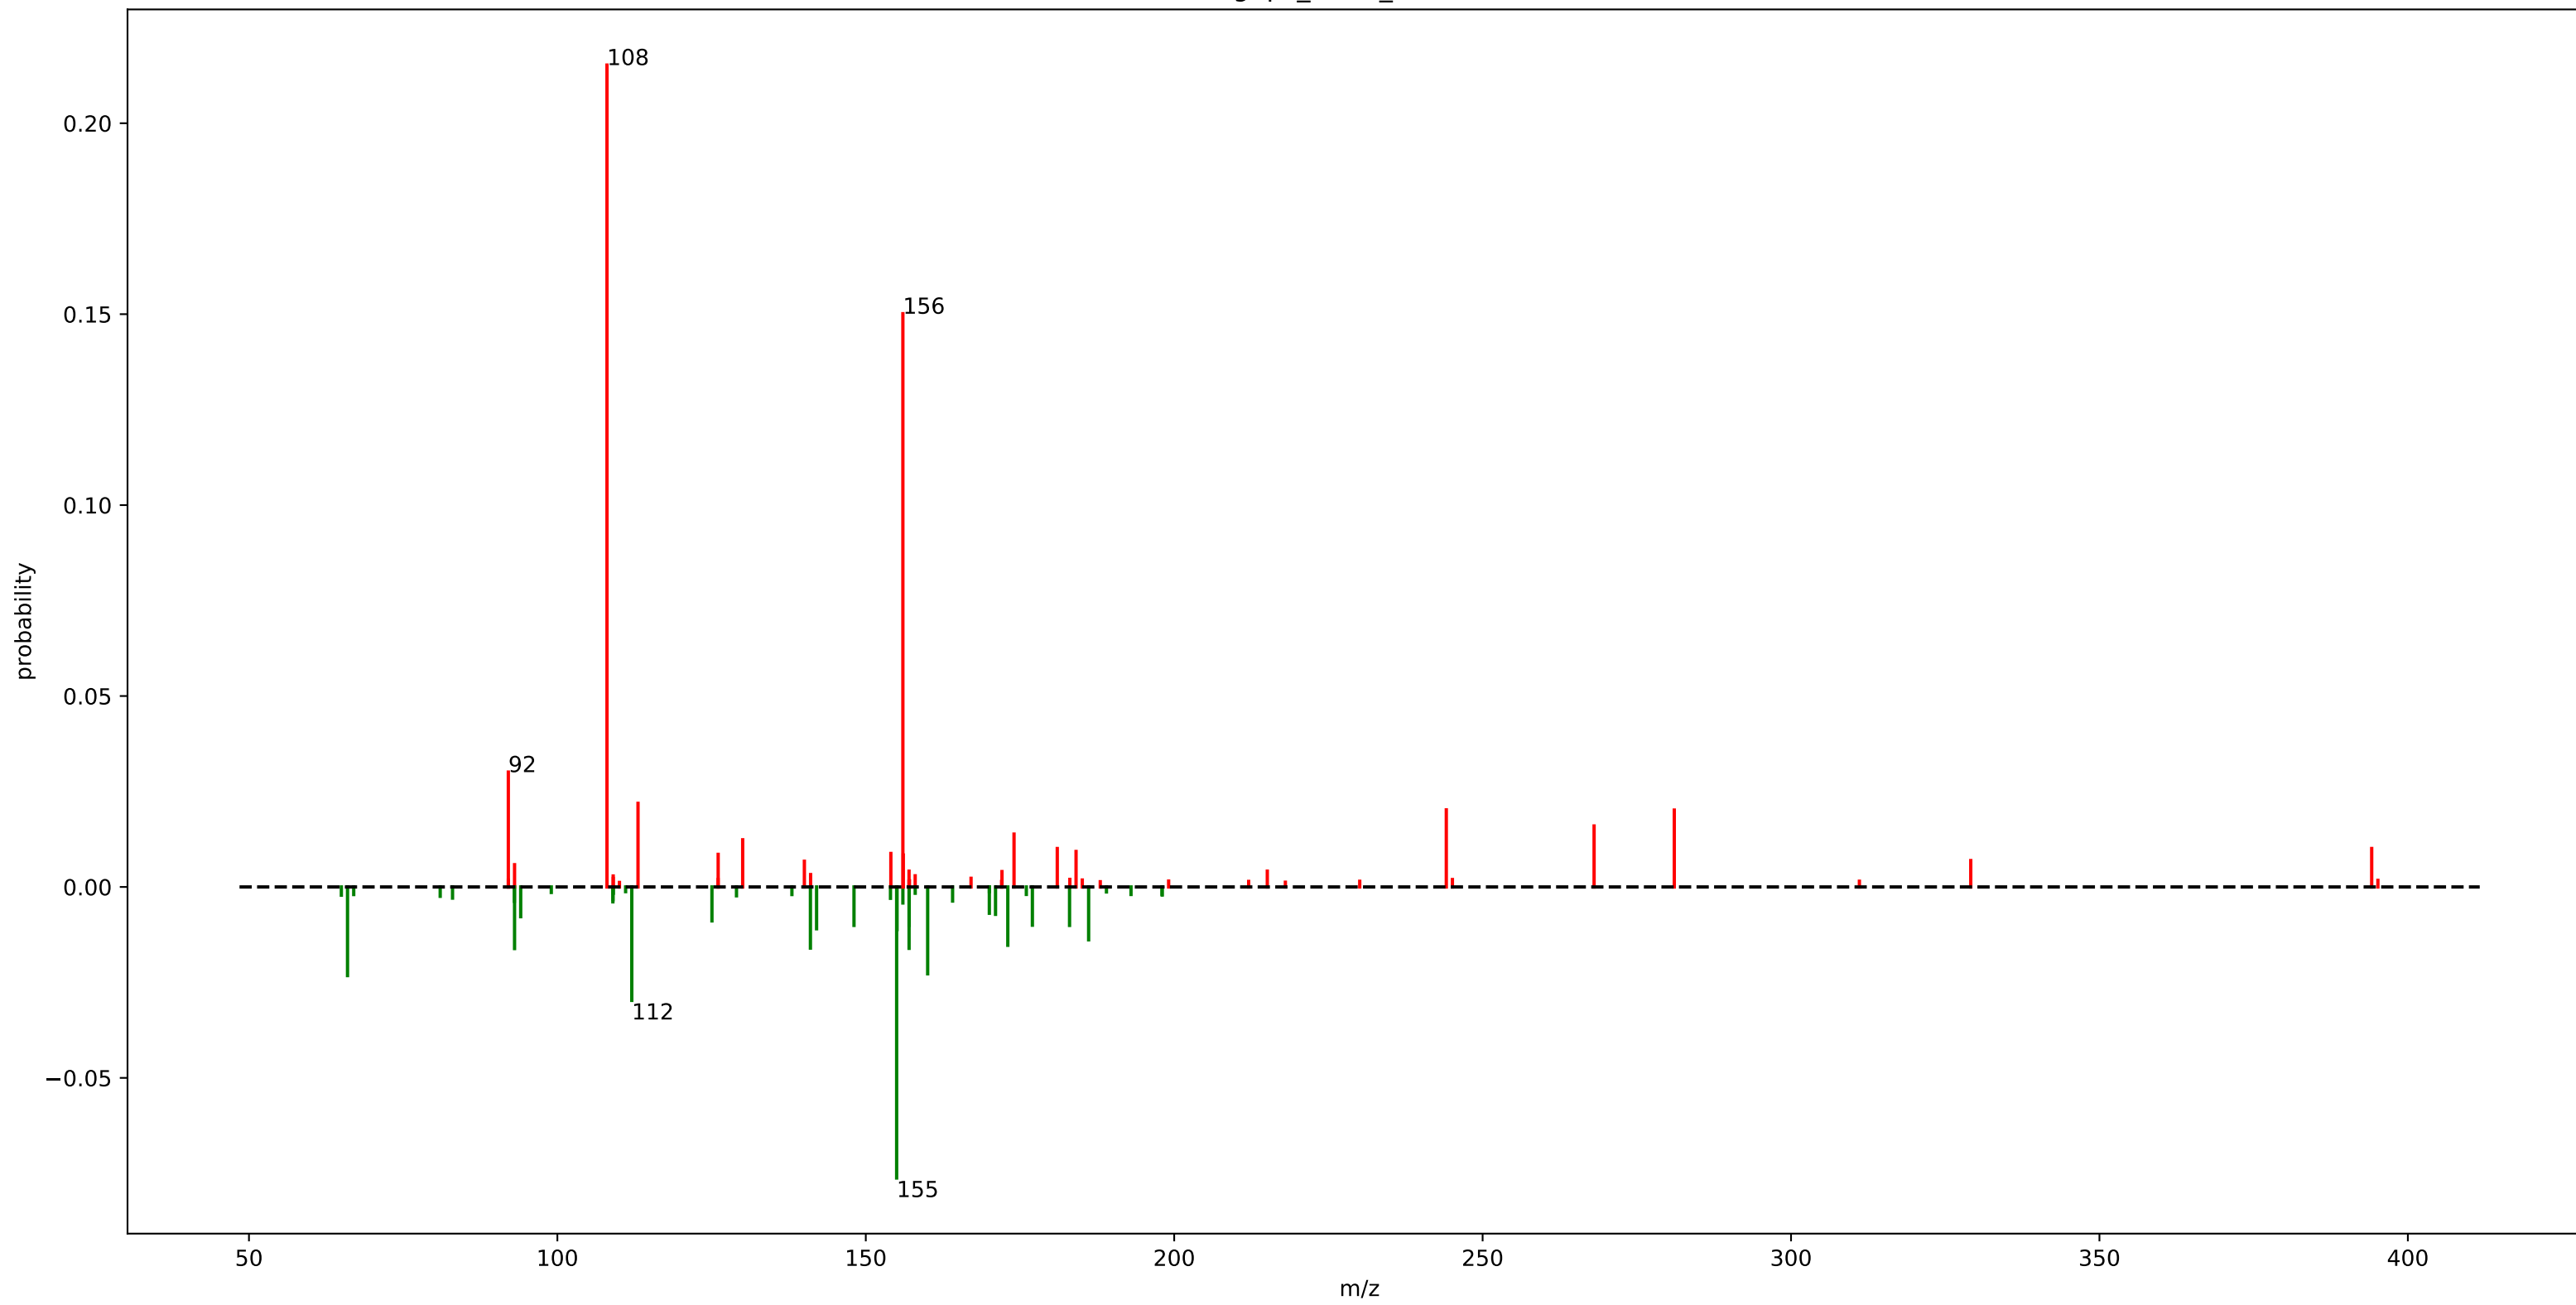

## gnps\_motif\_2.m2m

|                   |        |                   |        |
|-------------------|--------|-------------------|--------|
| fragment_108.0425 | : 0.22 | loss_157.0275     | : 0.01 |
| fragment_156.0125 | : 0.15 | loss_183.0325     | : 0.01 |
| loss_155.0025     | : 0.08 | fragment_394.1375 | : 0.01 |
| fragment_92.0475  | : 0.03 | loss_148.0875     | : 0.01 |
| loss_112.0625     | : 0.03 | fragment_181.0425 | : 0.01 |
| loss_65.9775      | : 0.02 | loss_177.0075     | : 0.01 |
| loss_160.0325     | : 0.02 | fragment_184.0875 | : 0.01 |
| fragment_113.0725 | : 0.02 | loss_125.0575     | : 0.01 |
| fragment_244.1125 | : 0.02 | fragment_154.0625 | : 0.01 |
| fragment_281.0725 | : 0.02 | fragment_126.0675 | : 0.01 |
| loss_93.0575      | : 0.02 | fragment_156.0775 | : 0.01 |
| loss_157.0175     | : 0.02 | loss_94.0525      | : 0.01 |
| loss_141.0225     | : 0.02 | loss_171.0325     | : 0.01 |
| fragment_268.0725 | : 0.02 | fragment_329.1375 | : 0.01 |
| loss_173.0225     | : 0.02 | loss_170.0275     | : 0.01 |
| fragment_174.0325 | : 0.01 | fragment_140.0425 | : 0.01 |
| loss_186.1275     | : 0.01 | fragment_93.0575  | : 0.01 |
| fragment_130.0425 | : 0.01 |                   |        |
| loss_155.0675     | : 0.01 |                   |        |
| loss_142.0225     | : 0.01 |                   |        |

motif\_401

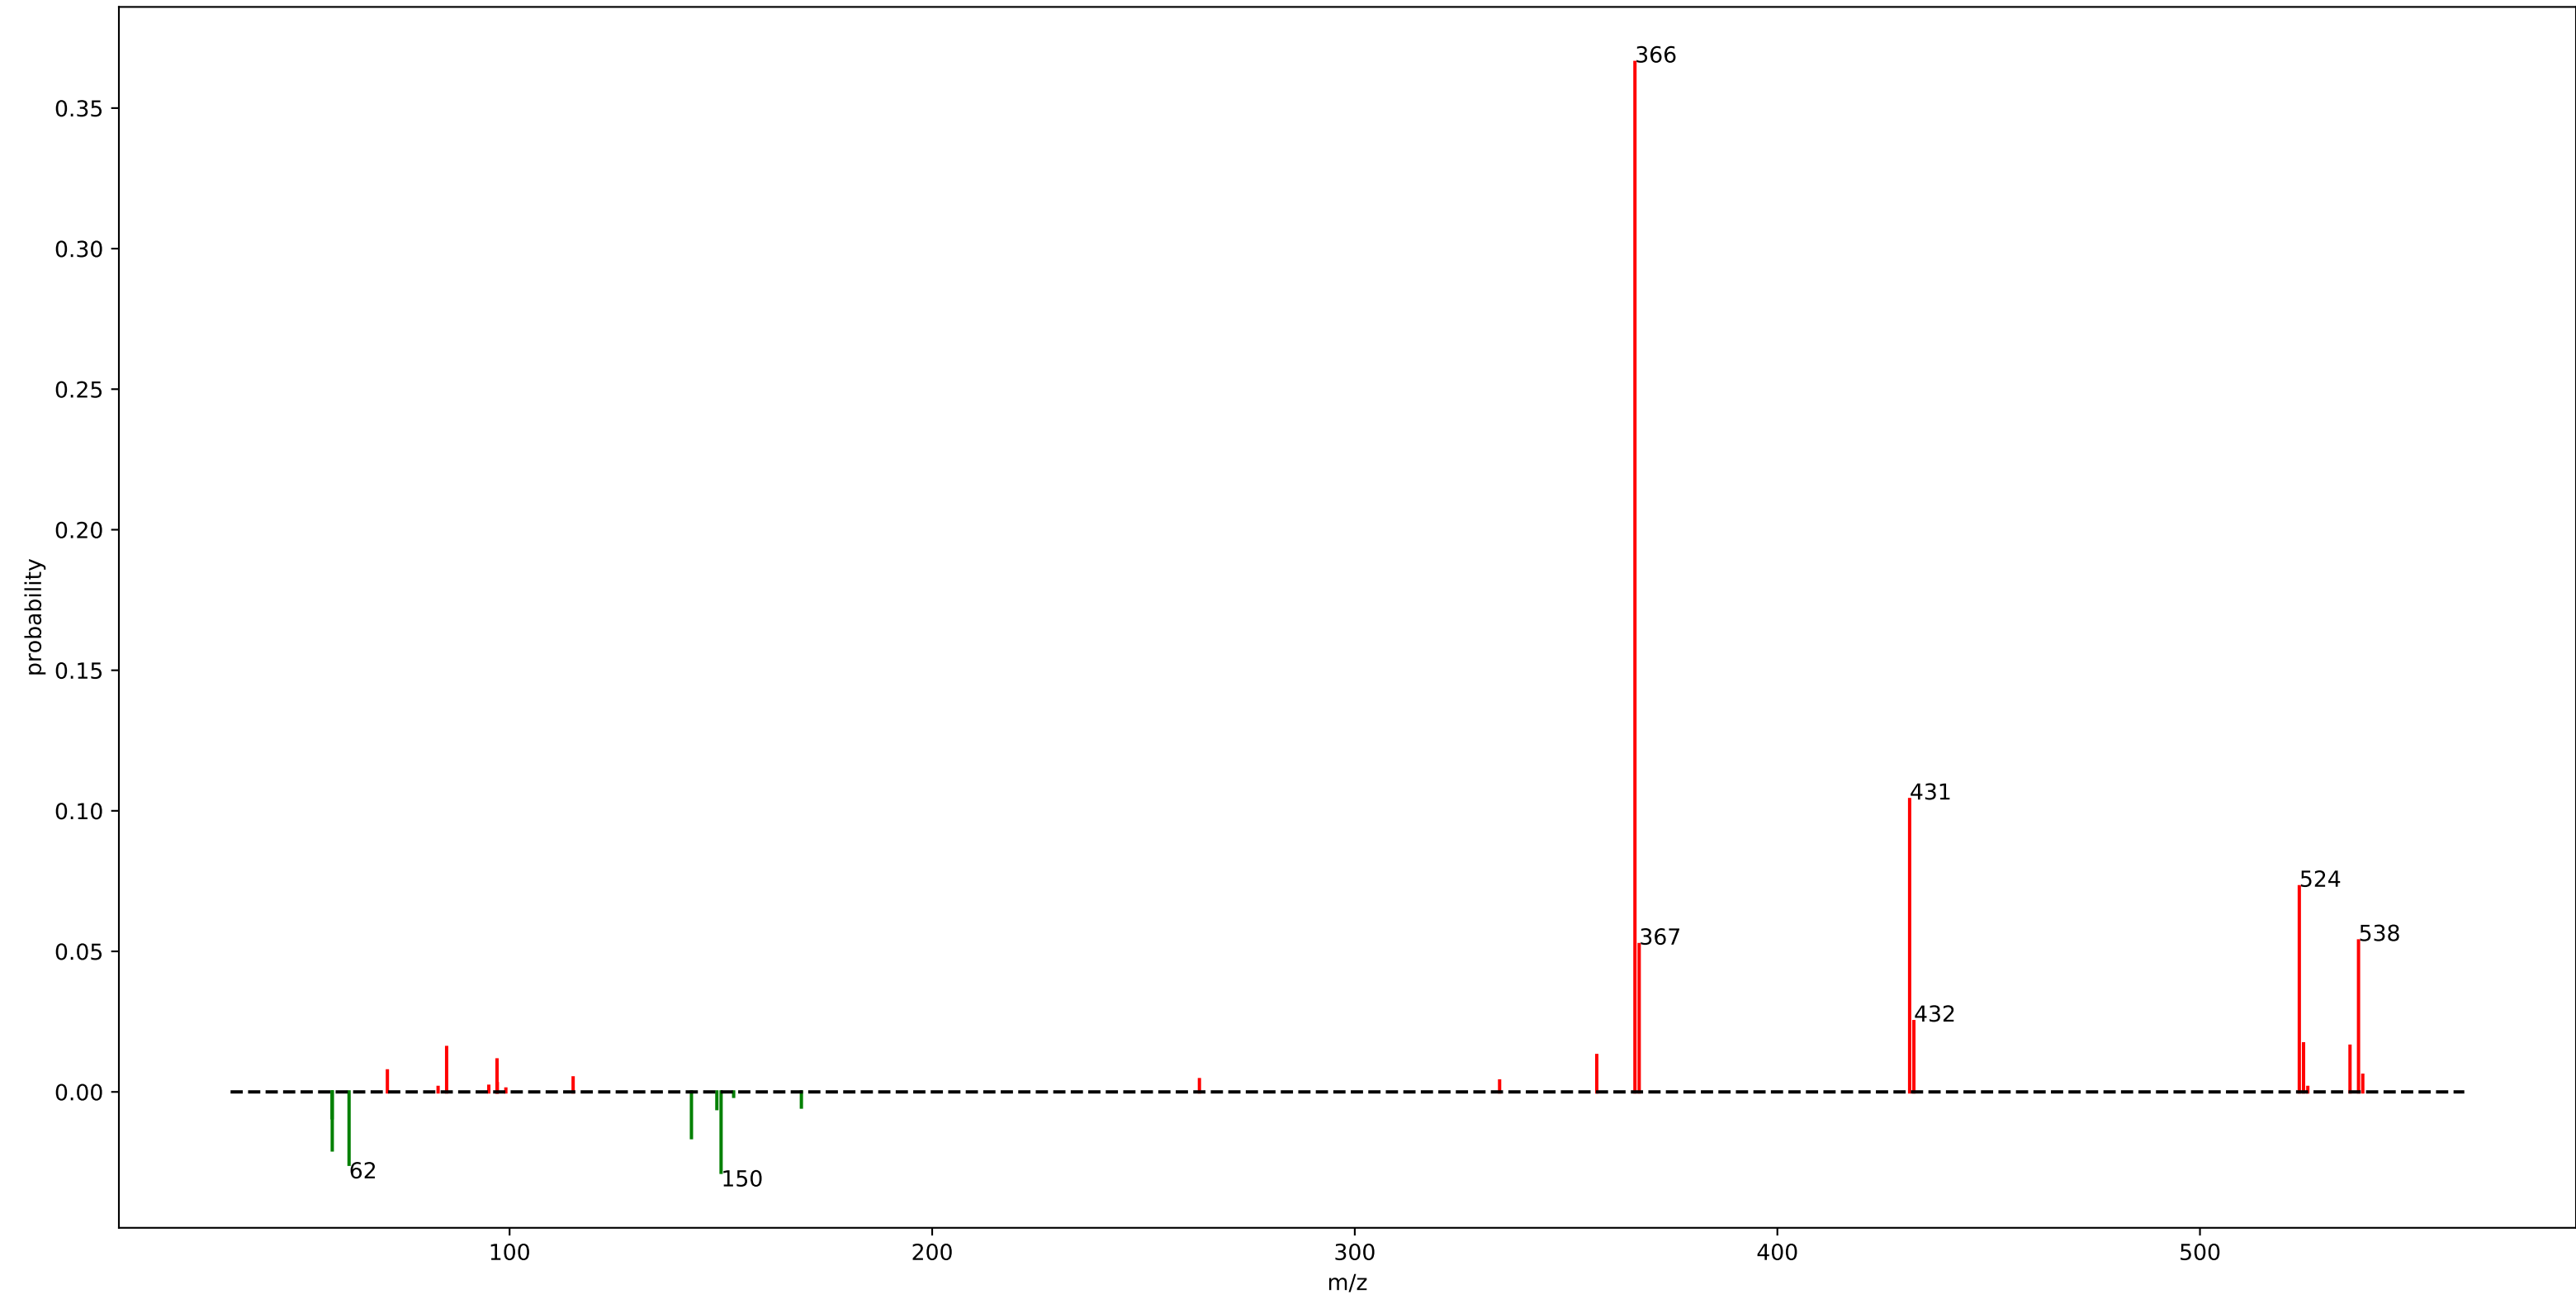

## motif\_401

|                   |        |               |        |
|-------------------|--------|---------------|--------|
| fragment_366.2975 | : 0.37 | loss_169.0475 | : 0.01 |
| fragment_431.2975 | : 0.10 |               |        |
| fragment_523.5075 | : 0.07 |               |        |
| fragment_537.5225 | : 0.05 |               |        |
| fragment_367.3025 | : 0.05 |               |        |
| loss_150.0475     | : 0.03 |               |        |
| loss_62.0125      | : 0.03 |               |        |
| fragment_432.3025 | : 0.03 |               |        |
| loss_58.0375      | : 0.02 |               |        |
| fragment_524.5125 | : 0.02 |               |        |
| loss_143.0325     | : 0.02 |               |        |
| fragment_535.5075 | : 0.02 |               |        |
| fragment_85.1025  | : 0.02 |               |        |
| fragment_357.2625 | : 0.01 |               |        |
| fragment_97.0275  | : 0.01 |               |        |
| fragment_97.0375  | : 0.01 |               |        |
| loss_58.0025      | : 0.01 |               |        |
| fragment_71.0825  | : 0.01 |               |        |
| fragment_538.5275 | : 0.01 |               |        |
| loss_149.0475     | : 0.01 |               |        |

motif\_400

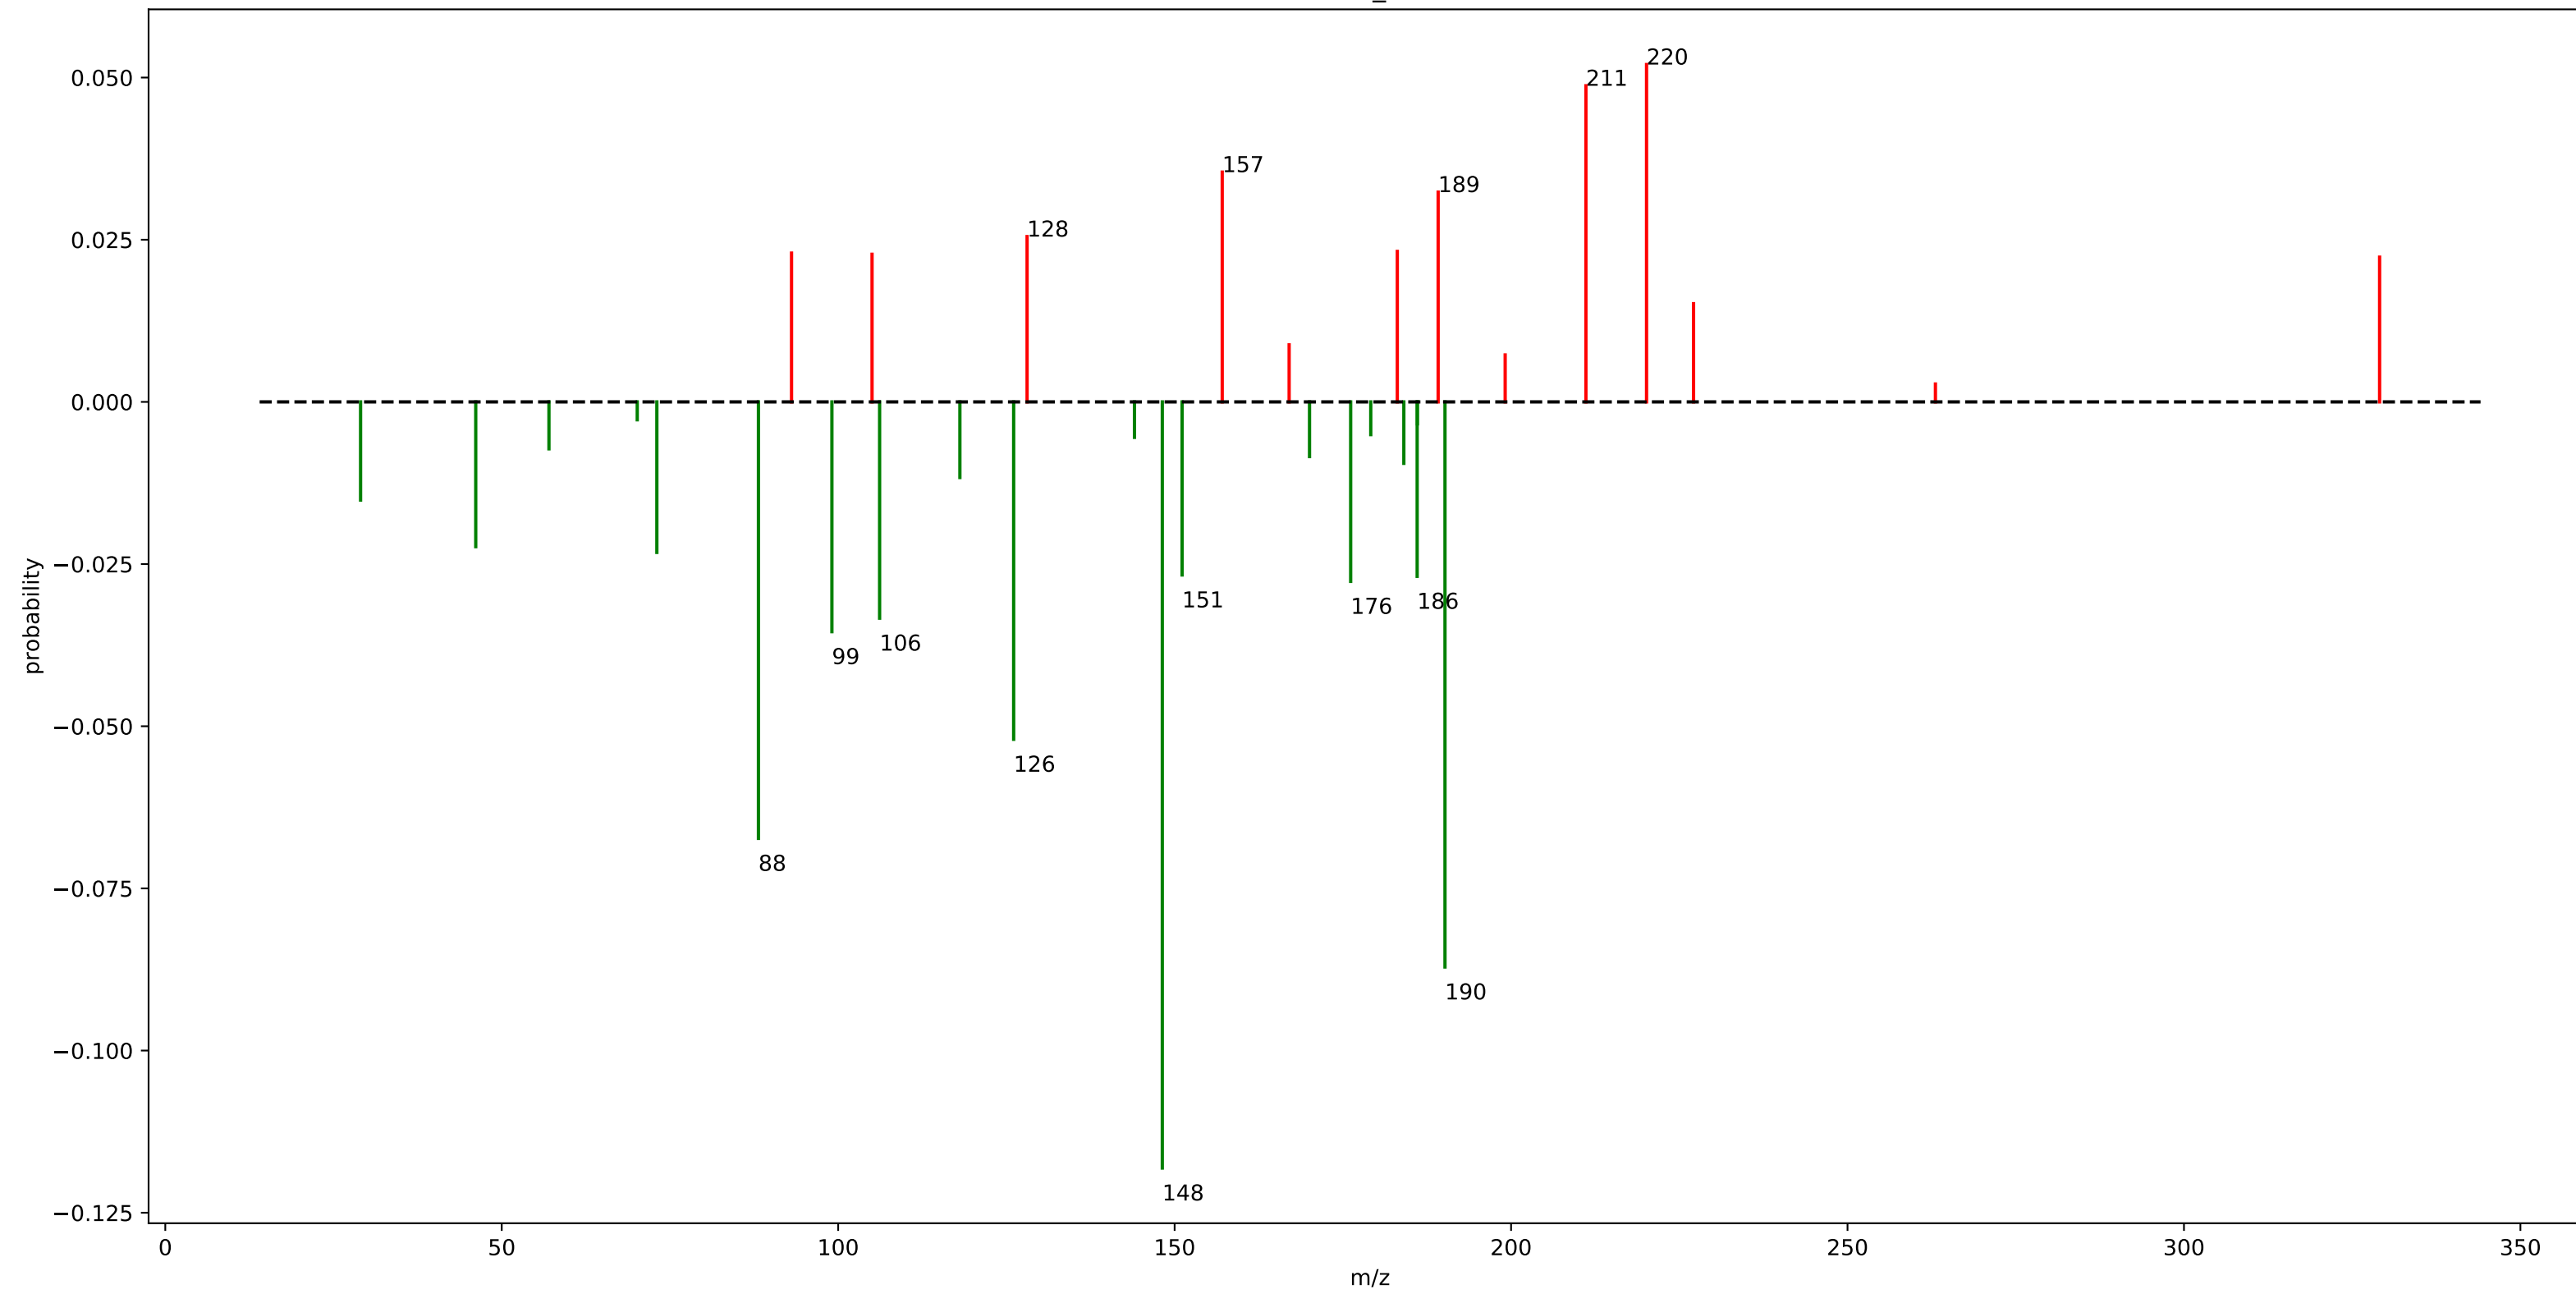

## motif\_400

|                   |        |                   |        |
|-------------------|--------|-------------------|--------|
| loss_148.1675     | : 0.12 | loss_29.0225      | : 0.02 |
| loss_190.1775     | : 0.09 | fragment_227.1175 | : 0.02 |
| loss_88.1475      | : 0.07 | loss_118.0875     | : 0.01 |
| loss_126.0775     | : 0.05 | loss_184.0625     | : 0.01 |
| fragment_220.1325 | : 0.05 | fragment_167.0175 | : 0.01 |
| fragment_211.1225 | : 0.05 | loss_170.0475     | : 0.01 |
| fragment_157.0725 | : 0.04 | fragment_199.1225 | : 0.01 |
| loss_99.0675      | : 0.04 | loss_57.0175      | : 0.01 |
| loss_106.1575     | : 0.03 | loss_144.0325     | : 0.01 |
| fragment_189.1625 | : 0.03 | loss_179.1475     | : 0.01 |
| loss_176.1625     | : 0.03 |                   |        |
| loss_186.0425     | : 0.03 |                   |        |
| loss_151.1075     | : 0.03 |                   |        |
| fragment_128.0725 | : 0.03 |                   |        |
| fragment_183.0925 | : 0.02 |                   |        |
| loss_73.0525      | : 0.02 |                   |        |
| fragment_93.0675  | : 0.02 |                   |        |
| fragment_105.0325 | : 0.02 |                   |        |
| loss_46.1375      | : 0.02 |                   |        |
| fragment_329.0725 | : 0.02 |                   |        |



motif\_403

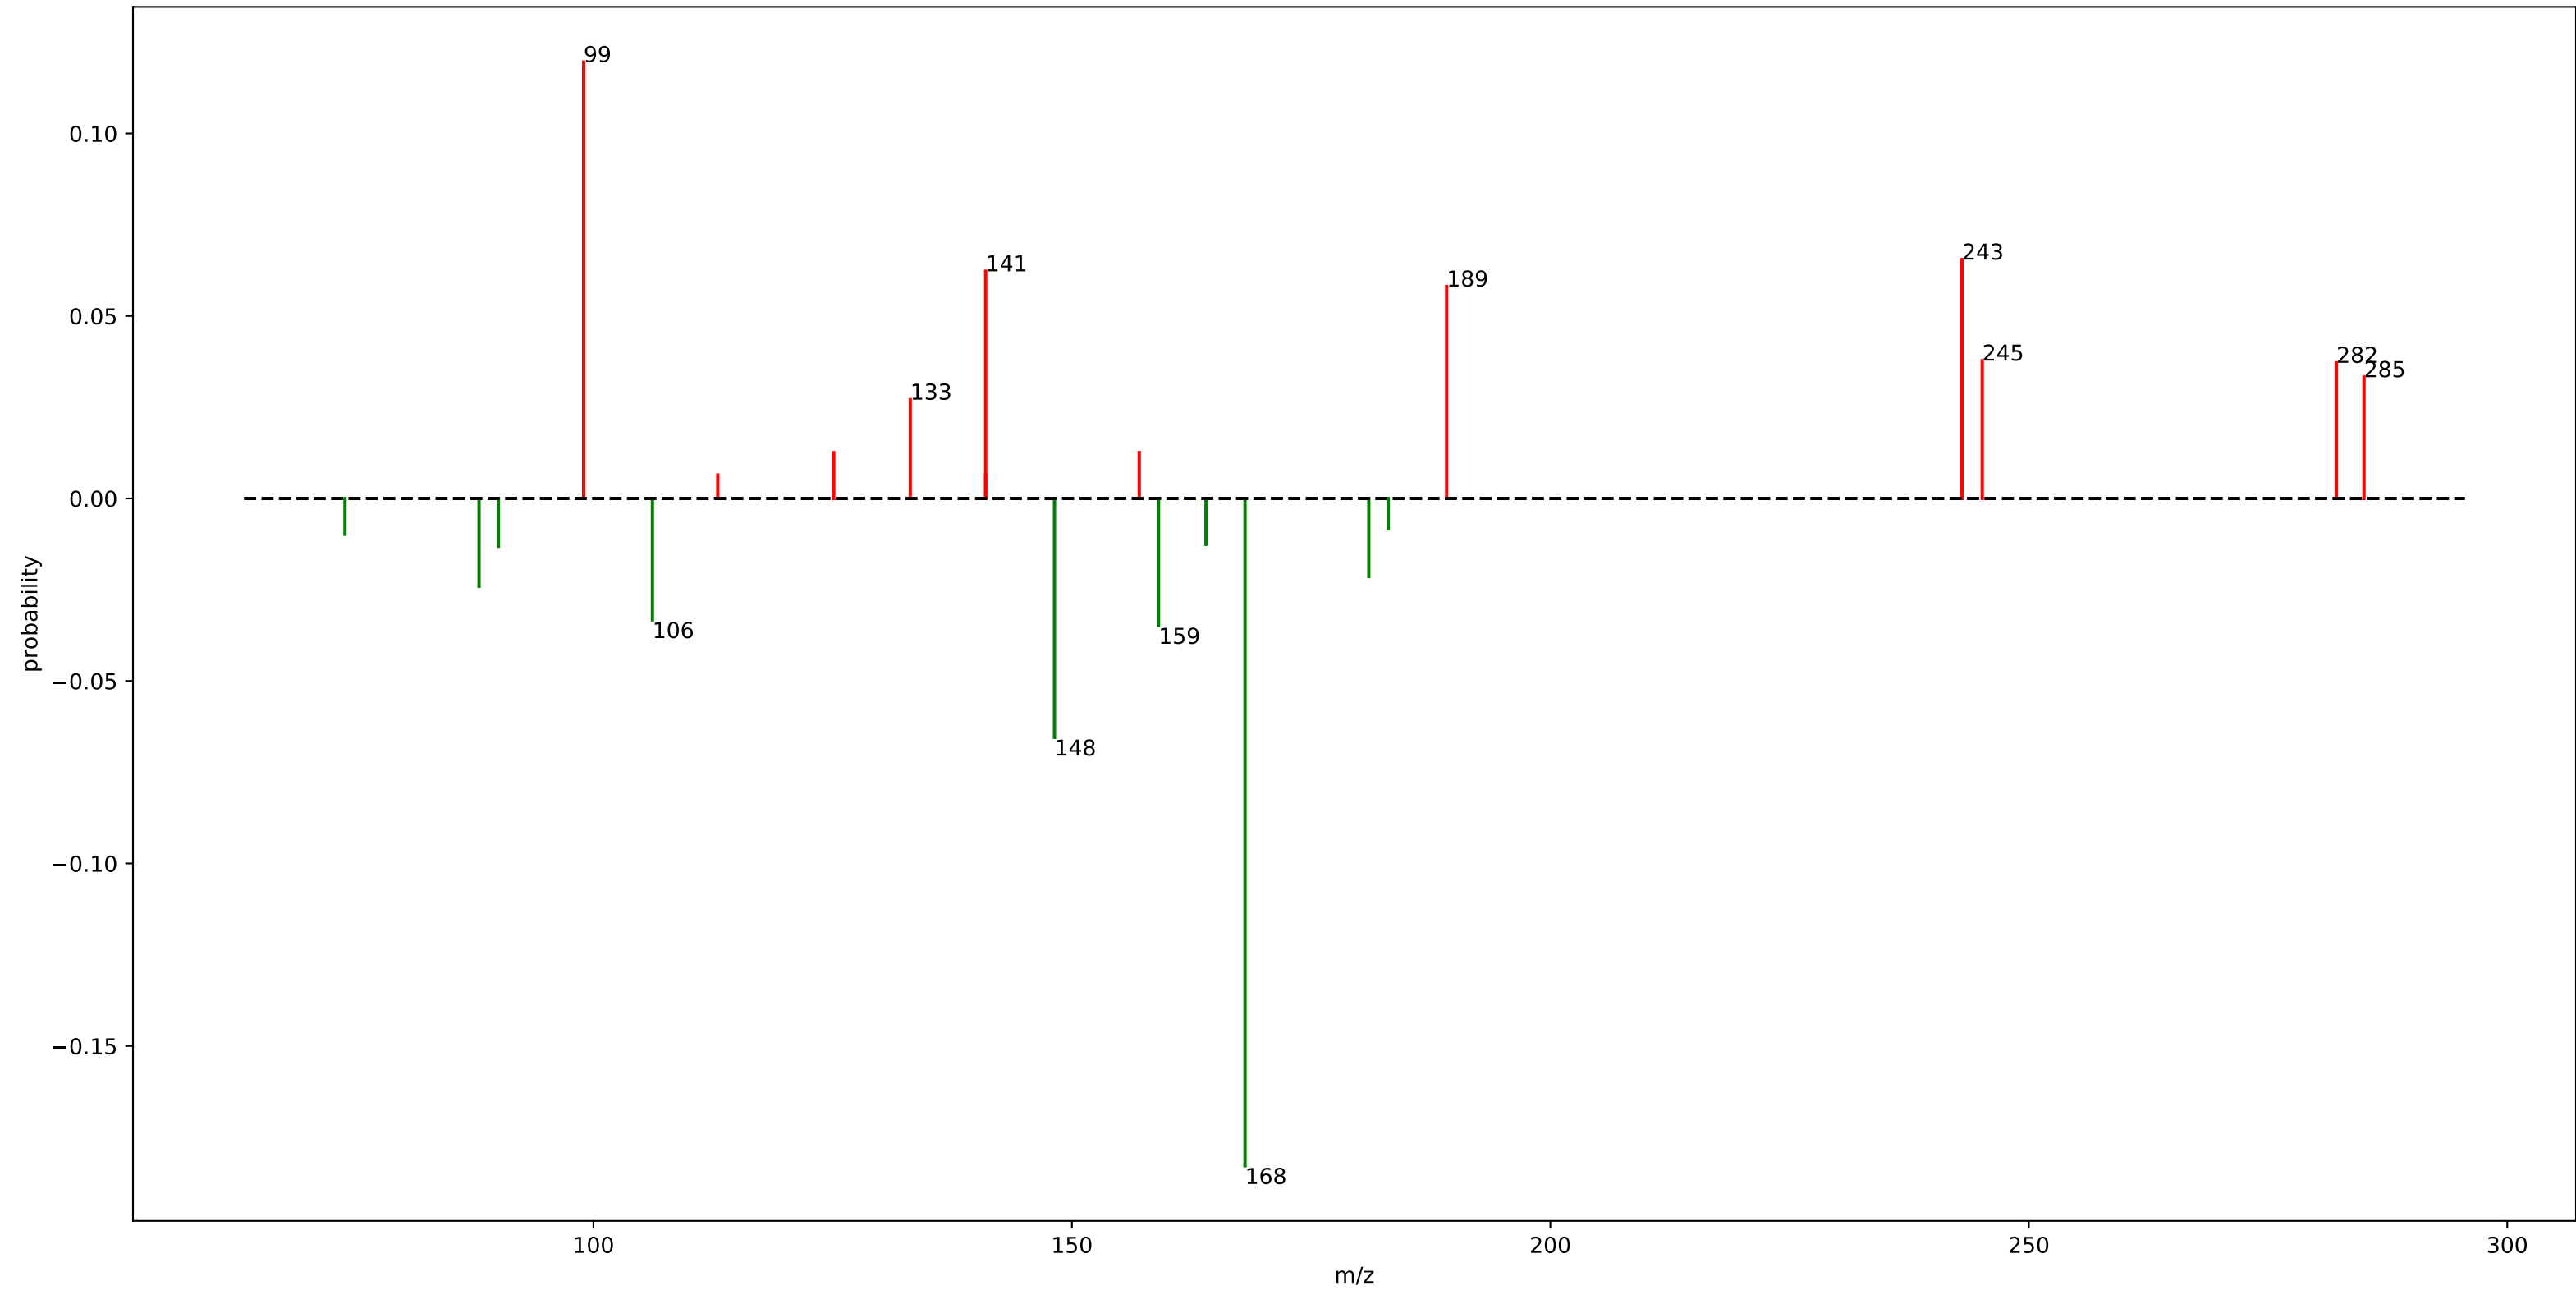

## motif\_403

|                   |        |                   |        |
|-------------------|--------|-------------------|--------|
| loss_168.0875     | : 0.18 | fragment_112.9925 | : 0.01 |
| fragment_98.9725  | : 0.12 | fragment_140.9825 | : 0.01 |
| loss_148.1775     | : 0.07 |                   |        |
| fragment_243.0175 | : 0.07 |                   |        |
| fragment_140.9875 | : 0.06 |                   |        |
| fragment_189.1625 | : 0.06 |                   |        |
| fragment_245.1275 | : 0.04 |                   |        |
| fragment_282.1475 | : 0.04 |                   |        |
| loss_159.0525     | : 0.03 |                   |        |
| loss_106.1625     | : 0.03 |                   |        |
| fragment_285.0275 | : 0.03 |                   |        |
| fragment_133.1025 | : 0.03 |                   |        |
| loss_88.0425      | : 0.02 |                   |        |
| loss_181.0275     | : 0.02 |                   |        |
| loss_90.0675      | : 0.01 |                   |        |
| fragment_125.1075 | : 0.01 |                   |        |
| loss_164.0075     | : 0.01 |                   |        |
| fragment_157.0325 | : 0.01 |                   |        |
| loss_74.0325      | : 0.01 |                   |        |
| loss_183.0525     | : 0.01 |                   |        |

gnps\_motif\_6.m2m

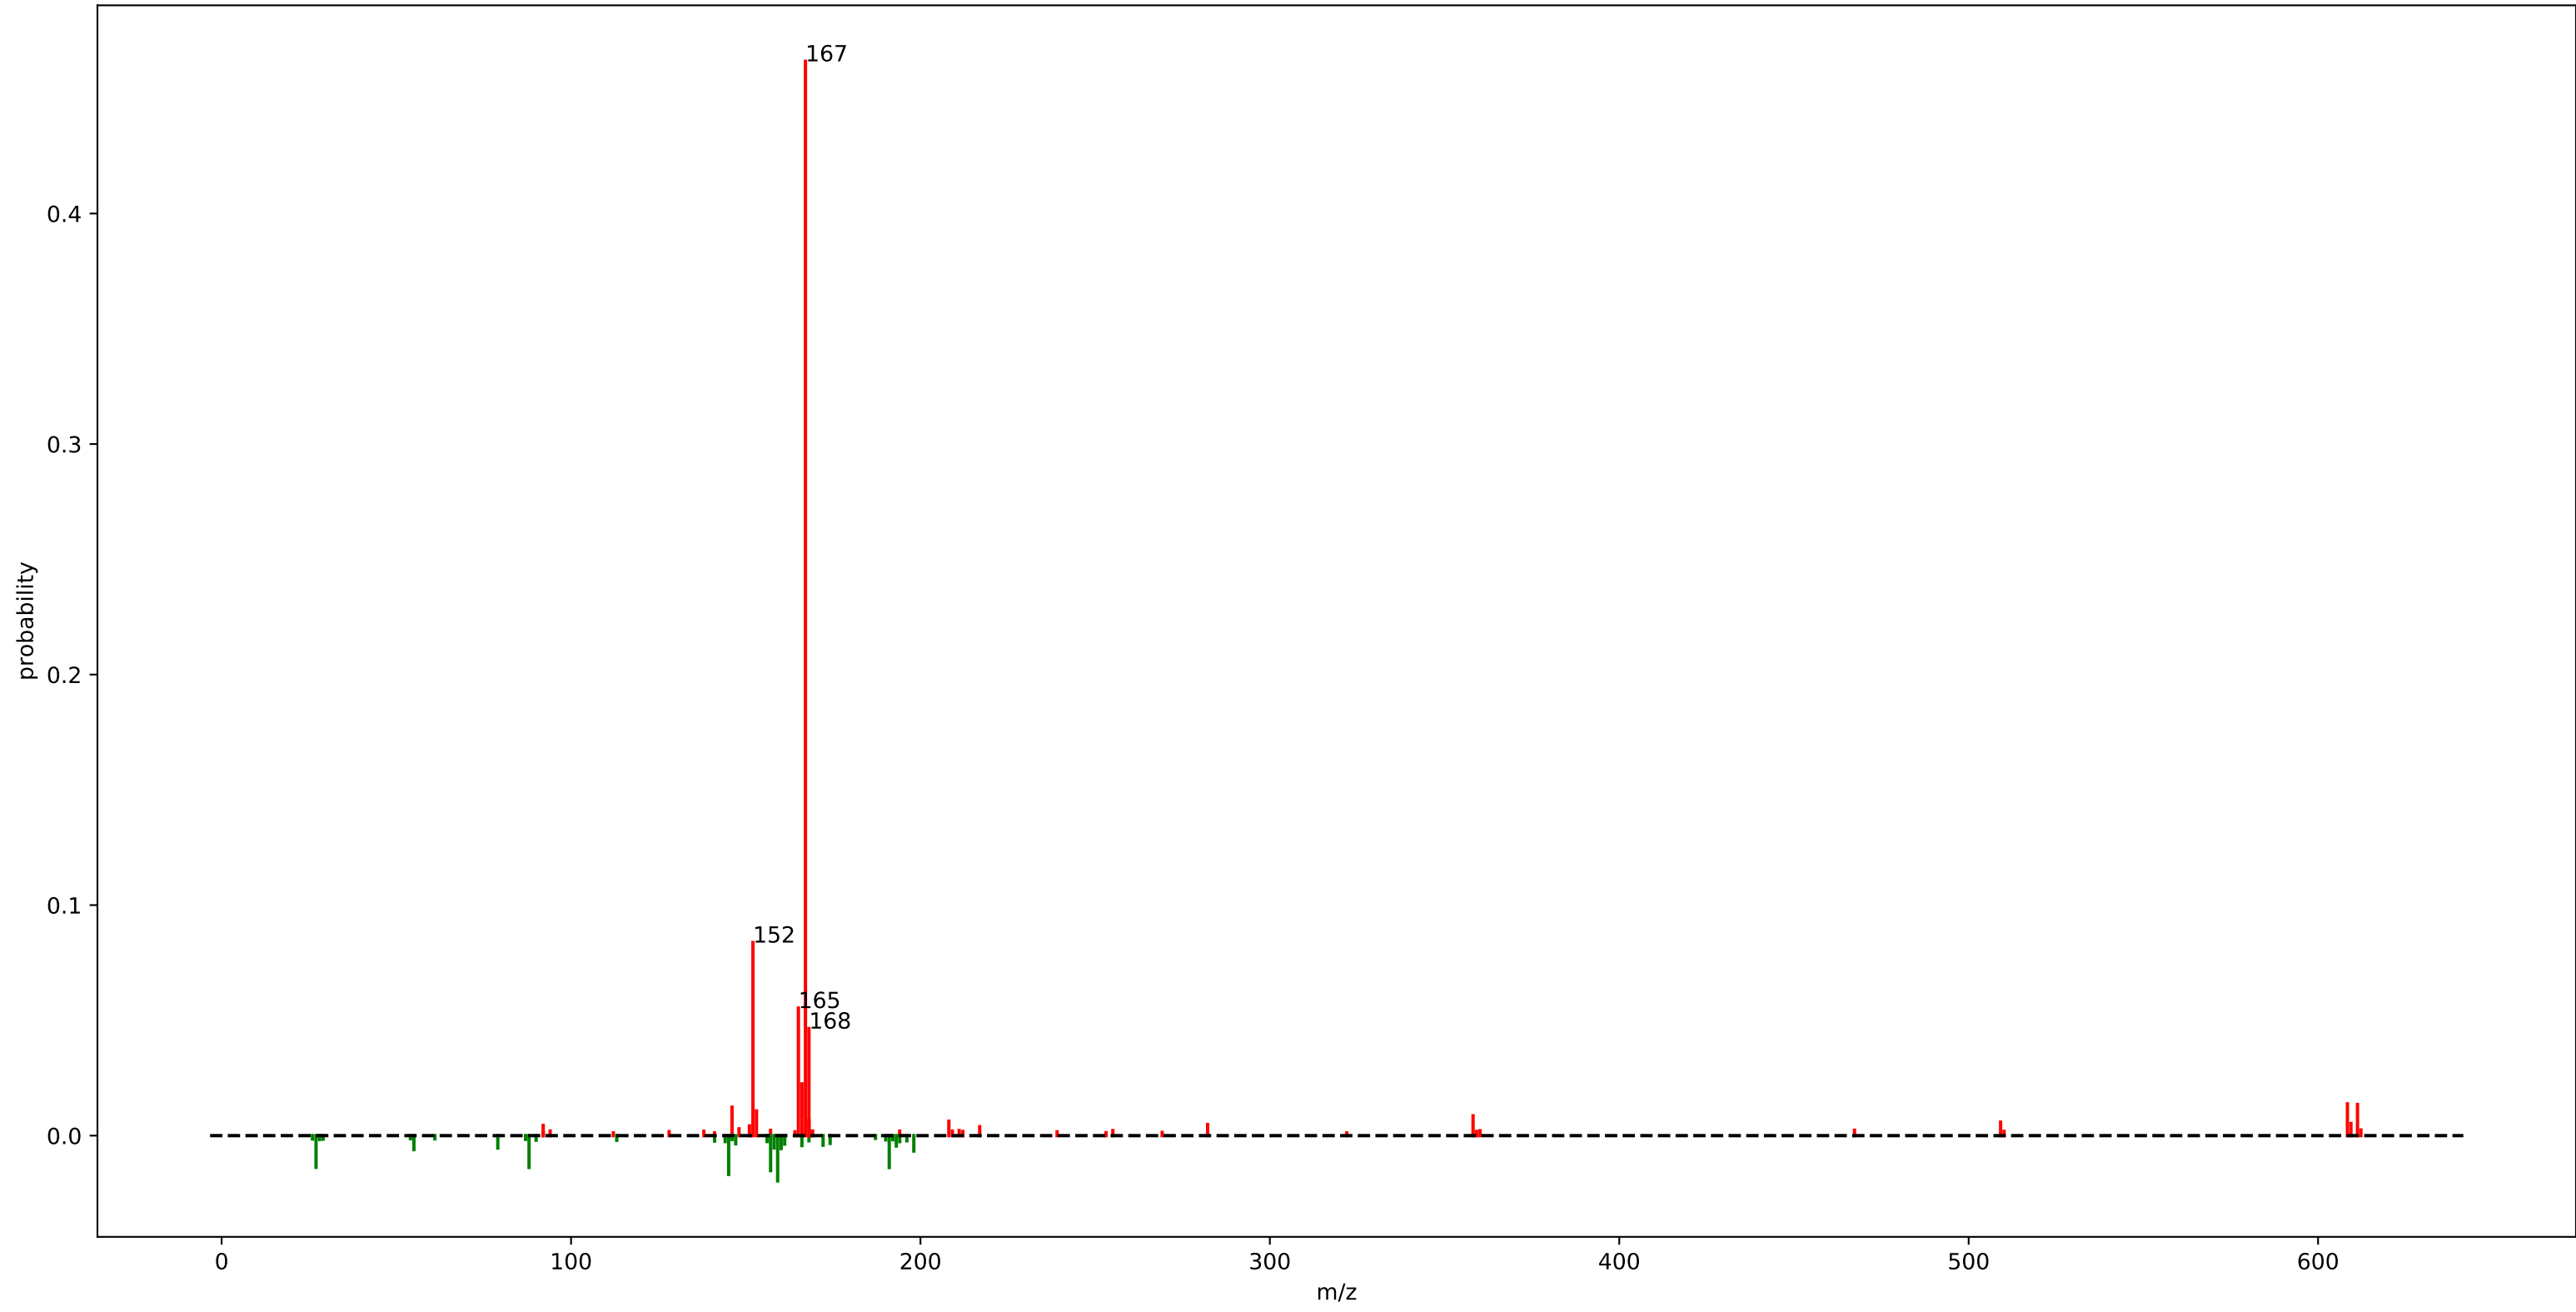

## gnps\_motif\_6.m2m

|                   |        |                   |        |
|-------------------|--------|-------------------|--------|
| fragment_167.0875 | : 0.47 | fragment_509.1425 | : 0.01 |
| fragment_152.0625 | : 0.08 | loss_160.1325     | : 0.01 |
| fragment_165.0675 | : 0.06 | loss_79.0375      | : 0.01 |
| fragment_168.0875 | : 0.05 | loss_158.1175     | : 0.01 |
| fragment_166.0775 | : 0.02 | fragment_609.4075 | : 0.01 |
| loss_159.1275     | : 0.02 |                   |        |
| loss_145.1125     | : 0.02 |                   |        |
| loss_157.1125     | : 0.02 |                   |        |
| loss_191.0675     | : 0.01 |                   |        |
| fragment_608.4025 | : 0.01 |                   |        |
| loss_87.9775      | : 0.01 |                   |        |
| loss_27.0125      | : 0.01 |                   |        |
| fragment_611.2875 | : 0.01 |                   |        |
| fragment_146.0725 | : 0.01 |                   |        |
| fragment_153.0675 | : 0.01 |                   |        |
| fragment_358.1575 | : 0.01 |                   |        |
| loss_198.1025     | : 0.01 |                   |        |
| fragment_168.0925 | : 0.01 |                   |        |
| fragment_208.1325 | : 0.01 |                   |        |
| loss_55.0325      | : 0.01 |                   |        |

motif\_405

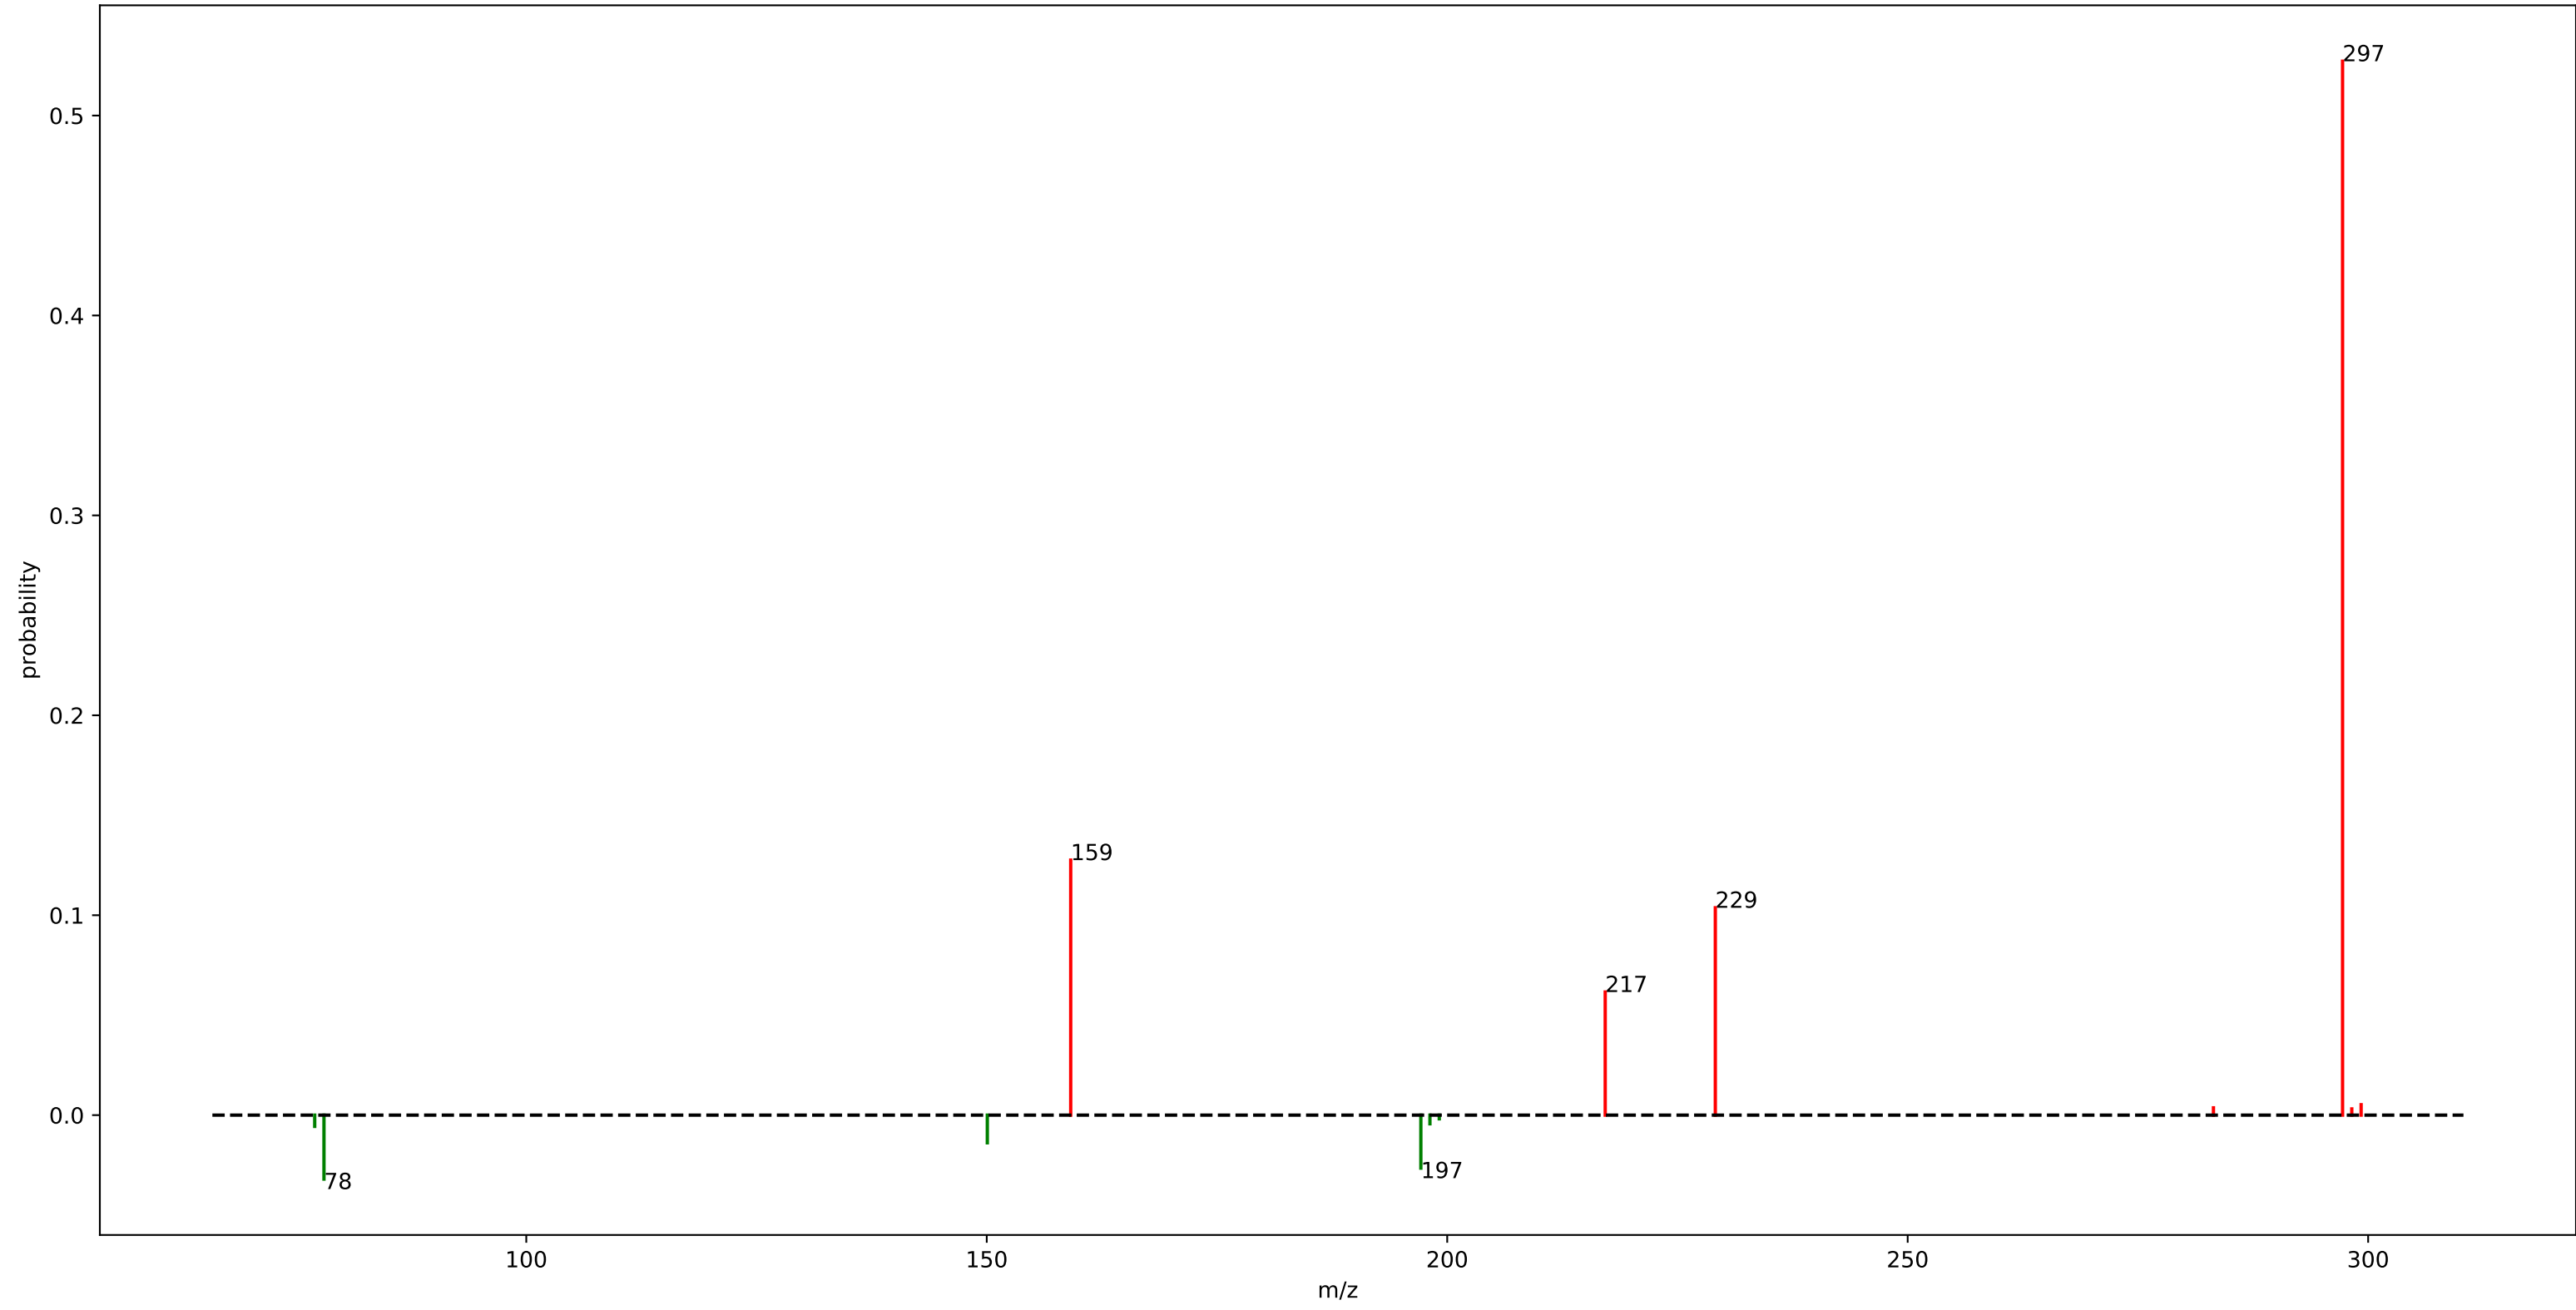

## motif\_405

|                   |        |
|-------------------|--------|
| fragment_297.2225 | : 0.53 |
| fragment_159.1175 | : 0.13 |
| fragment_229.1125 | : 0.10 |
| fragment_217.1575 | : 0.06 |
| loss_78.0325      | : 0.03 |
| loss_197.1375     | : 0.03 |
| loss_150.0625     | : 0.01 |
| loss_77.0275      | : 0.01 |
| fragment_299.2375 | : 0.01 |

motif\_404

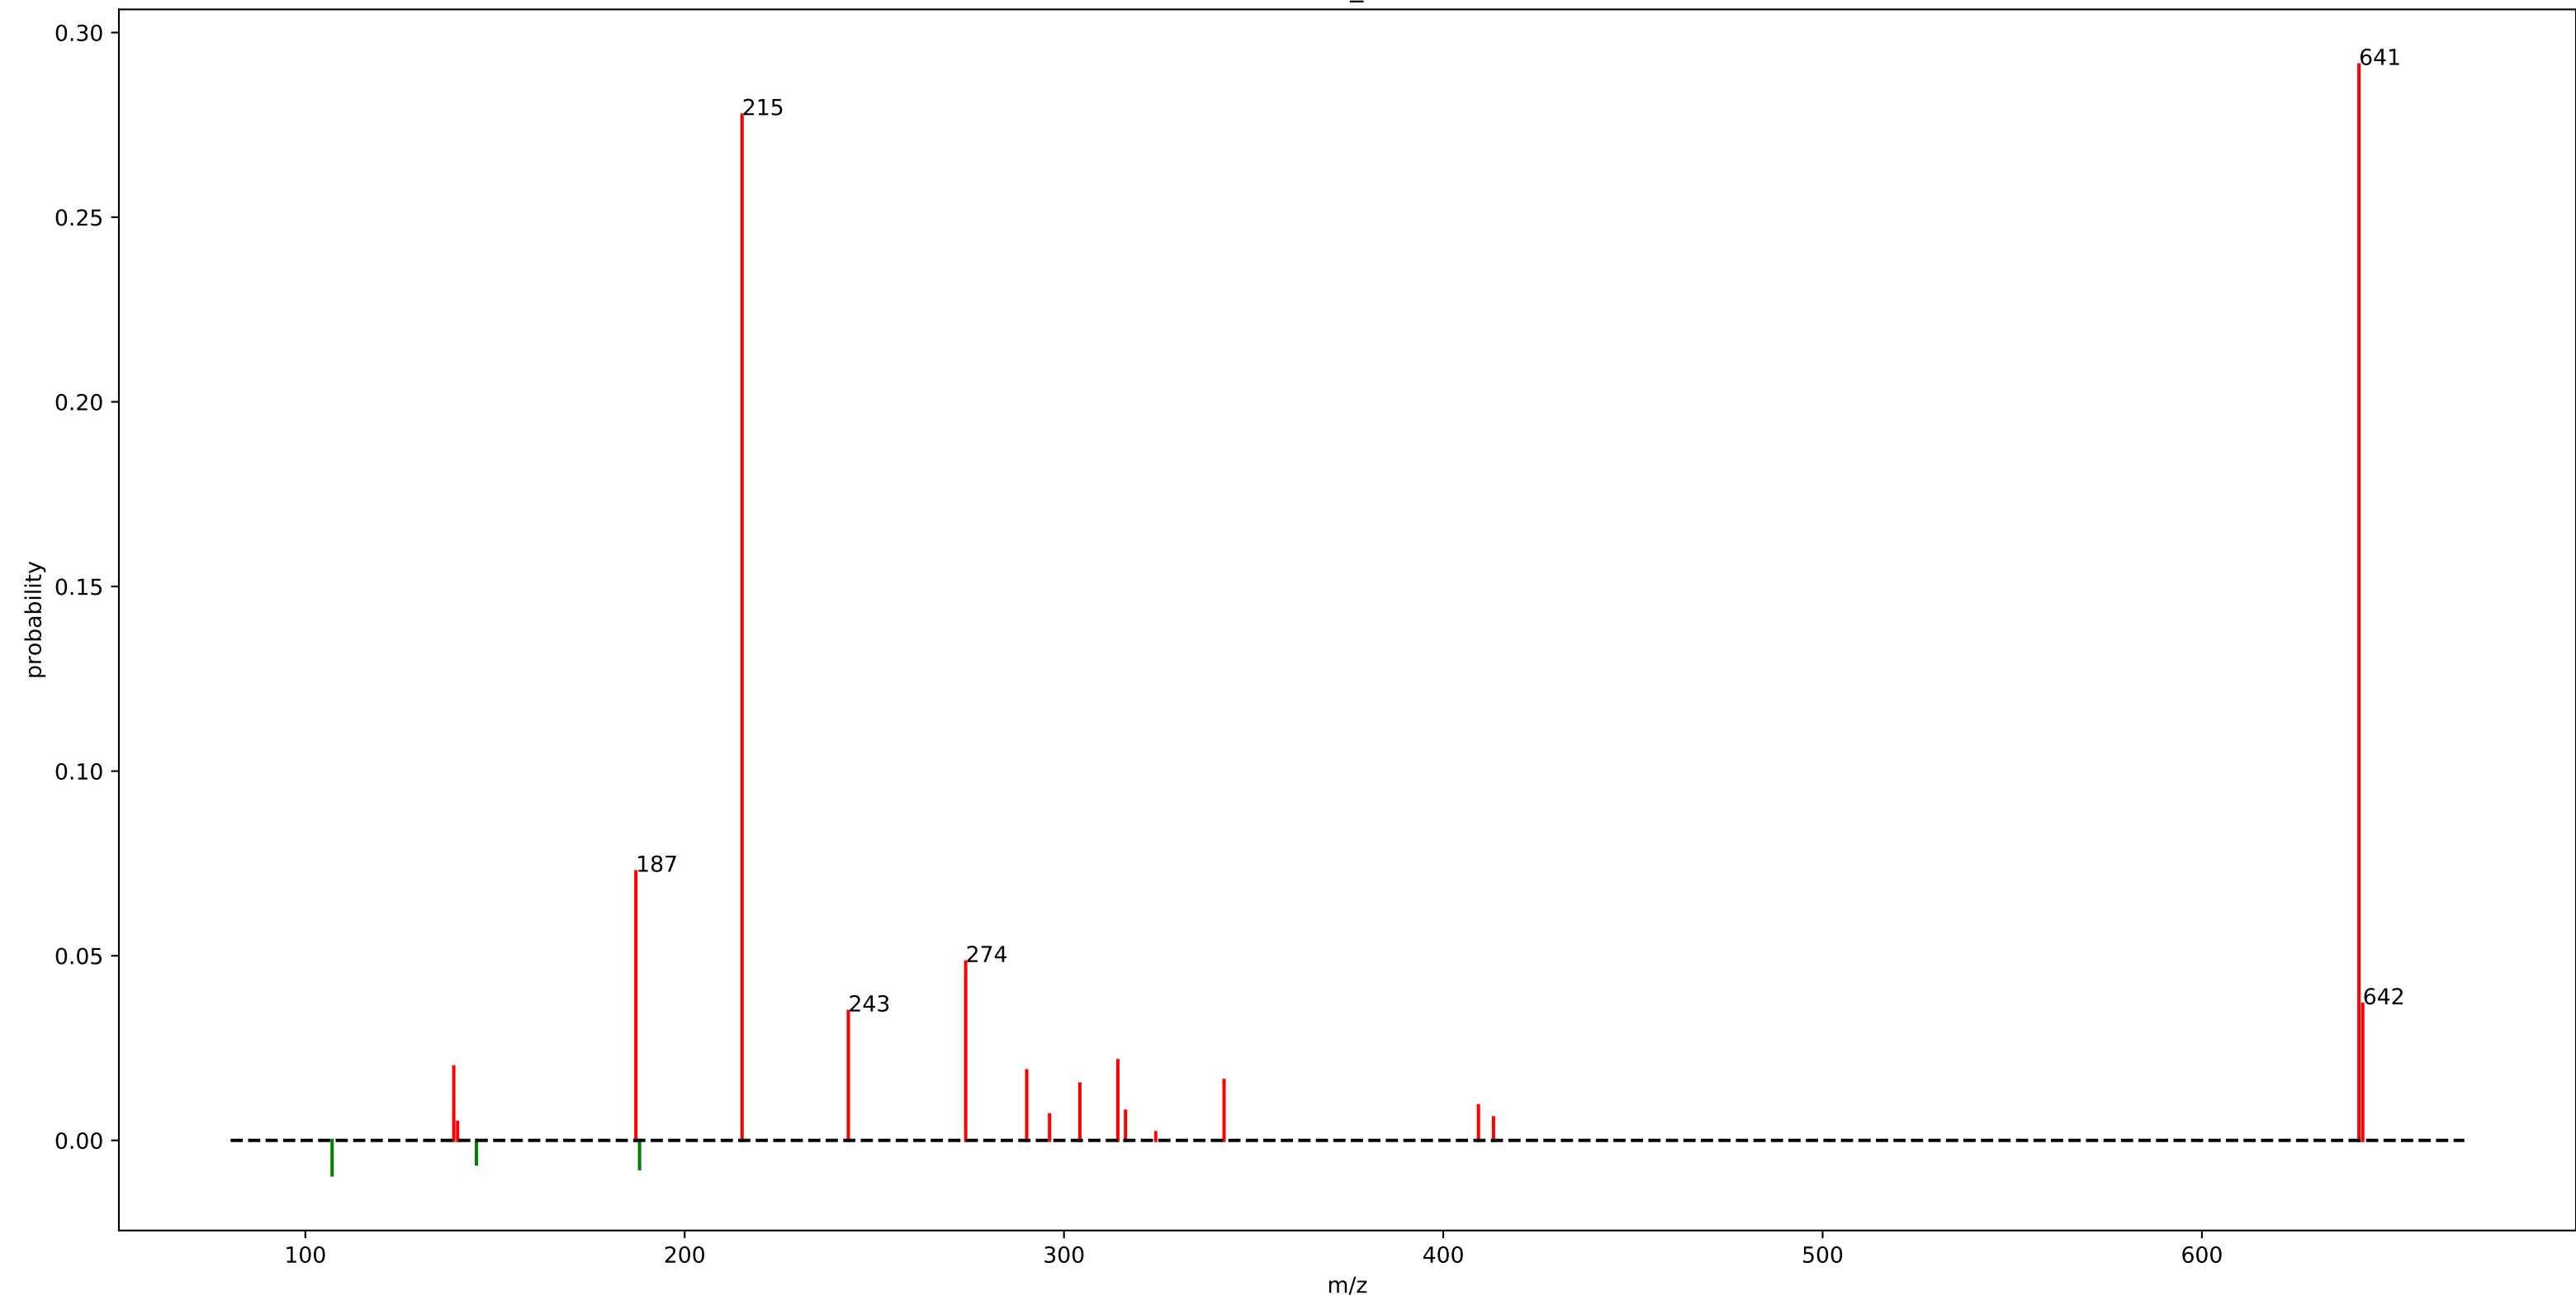

## motif\_404

|                   |        |
|-------------------|--------|
| fragment_641.4025 | : 0.29 |
| fragment_215.1375 | : 0.28 |
| fragment_187.1425 | : 0.07 |
| fragment_274.0875 | : 0.05 |
| fragment_642.4075 | : 0.04 |
| fragment_243.1425 | : 0.03 |
| fragment_314.2075 | : 0.02 |
| fragment_139.1325 | : 0.02 |
| fragment_290.1725 | : 0.02 |
| fragment_342.2025 | : 0.02 |
| fragment_304.1875 | : 0.02 |
| loss_107.0575     | : 0.01 |
| fragment_409.2775 | : 0.01 |
| fragment_316.2225 | : 0.01 |
| loss_188.1125     | : 0.01 |
| fragment_296.1975 | : 0.01 |
| loss_145.1075     | : 0.01 |
| fragment_413.2375 | : 0.01 |



motif\_407

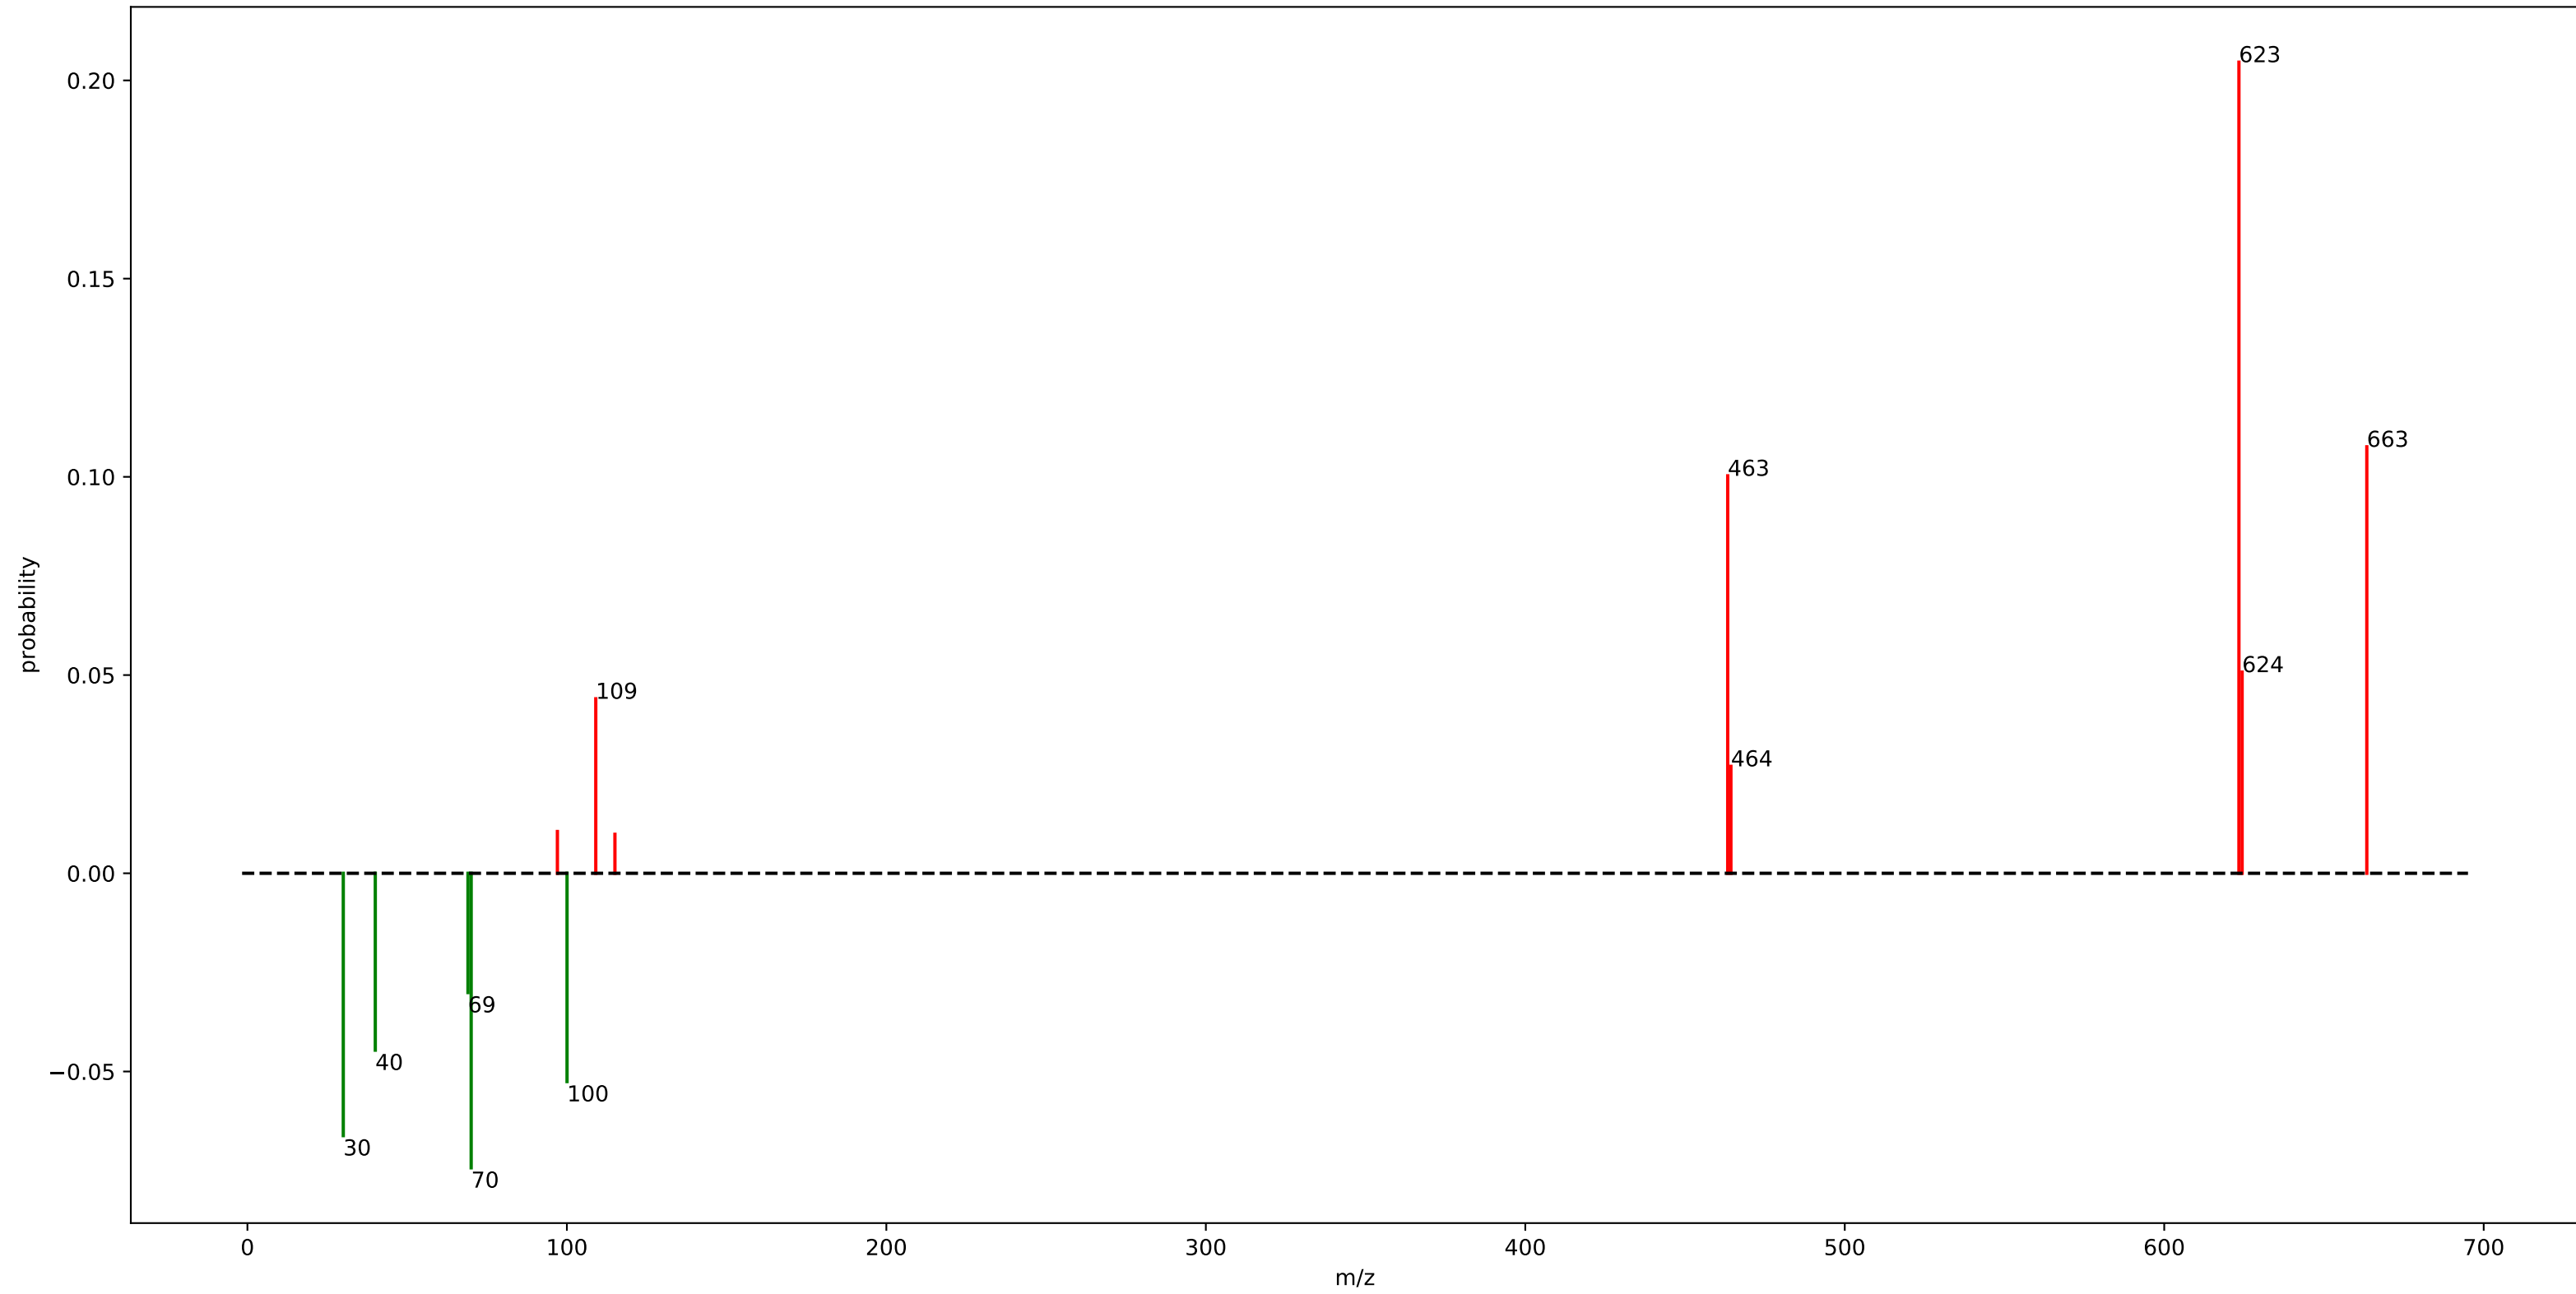

## motif\_407

|                   |        |
|-------------------|--------|
| fragment_623.3825 | : 0.20 |
| fragment_663.4125 | : 0.11 |
| fragment_463.3625 | : 0.10 |
| loss_70.0375      | : 0.07 |
| loss_30.0075      | : 0.07 |
| loss_100.0475     | : 0.05 |
| fragment_624.3825 | : 0.05 |
| loss_40.0275      | : 0.04 |
| fragment_109.0425 | : 0.04 |
| loss_69.0375      | : 0.03 |
| fragment_464.3625 | : 0.03 |
| fragment_97.0275  | : 0.01 |
| fragment_115.0375 | : 0.01 |

gnps\_motif\_45.m2m

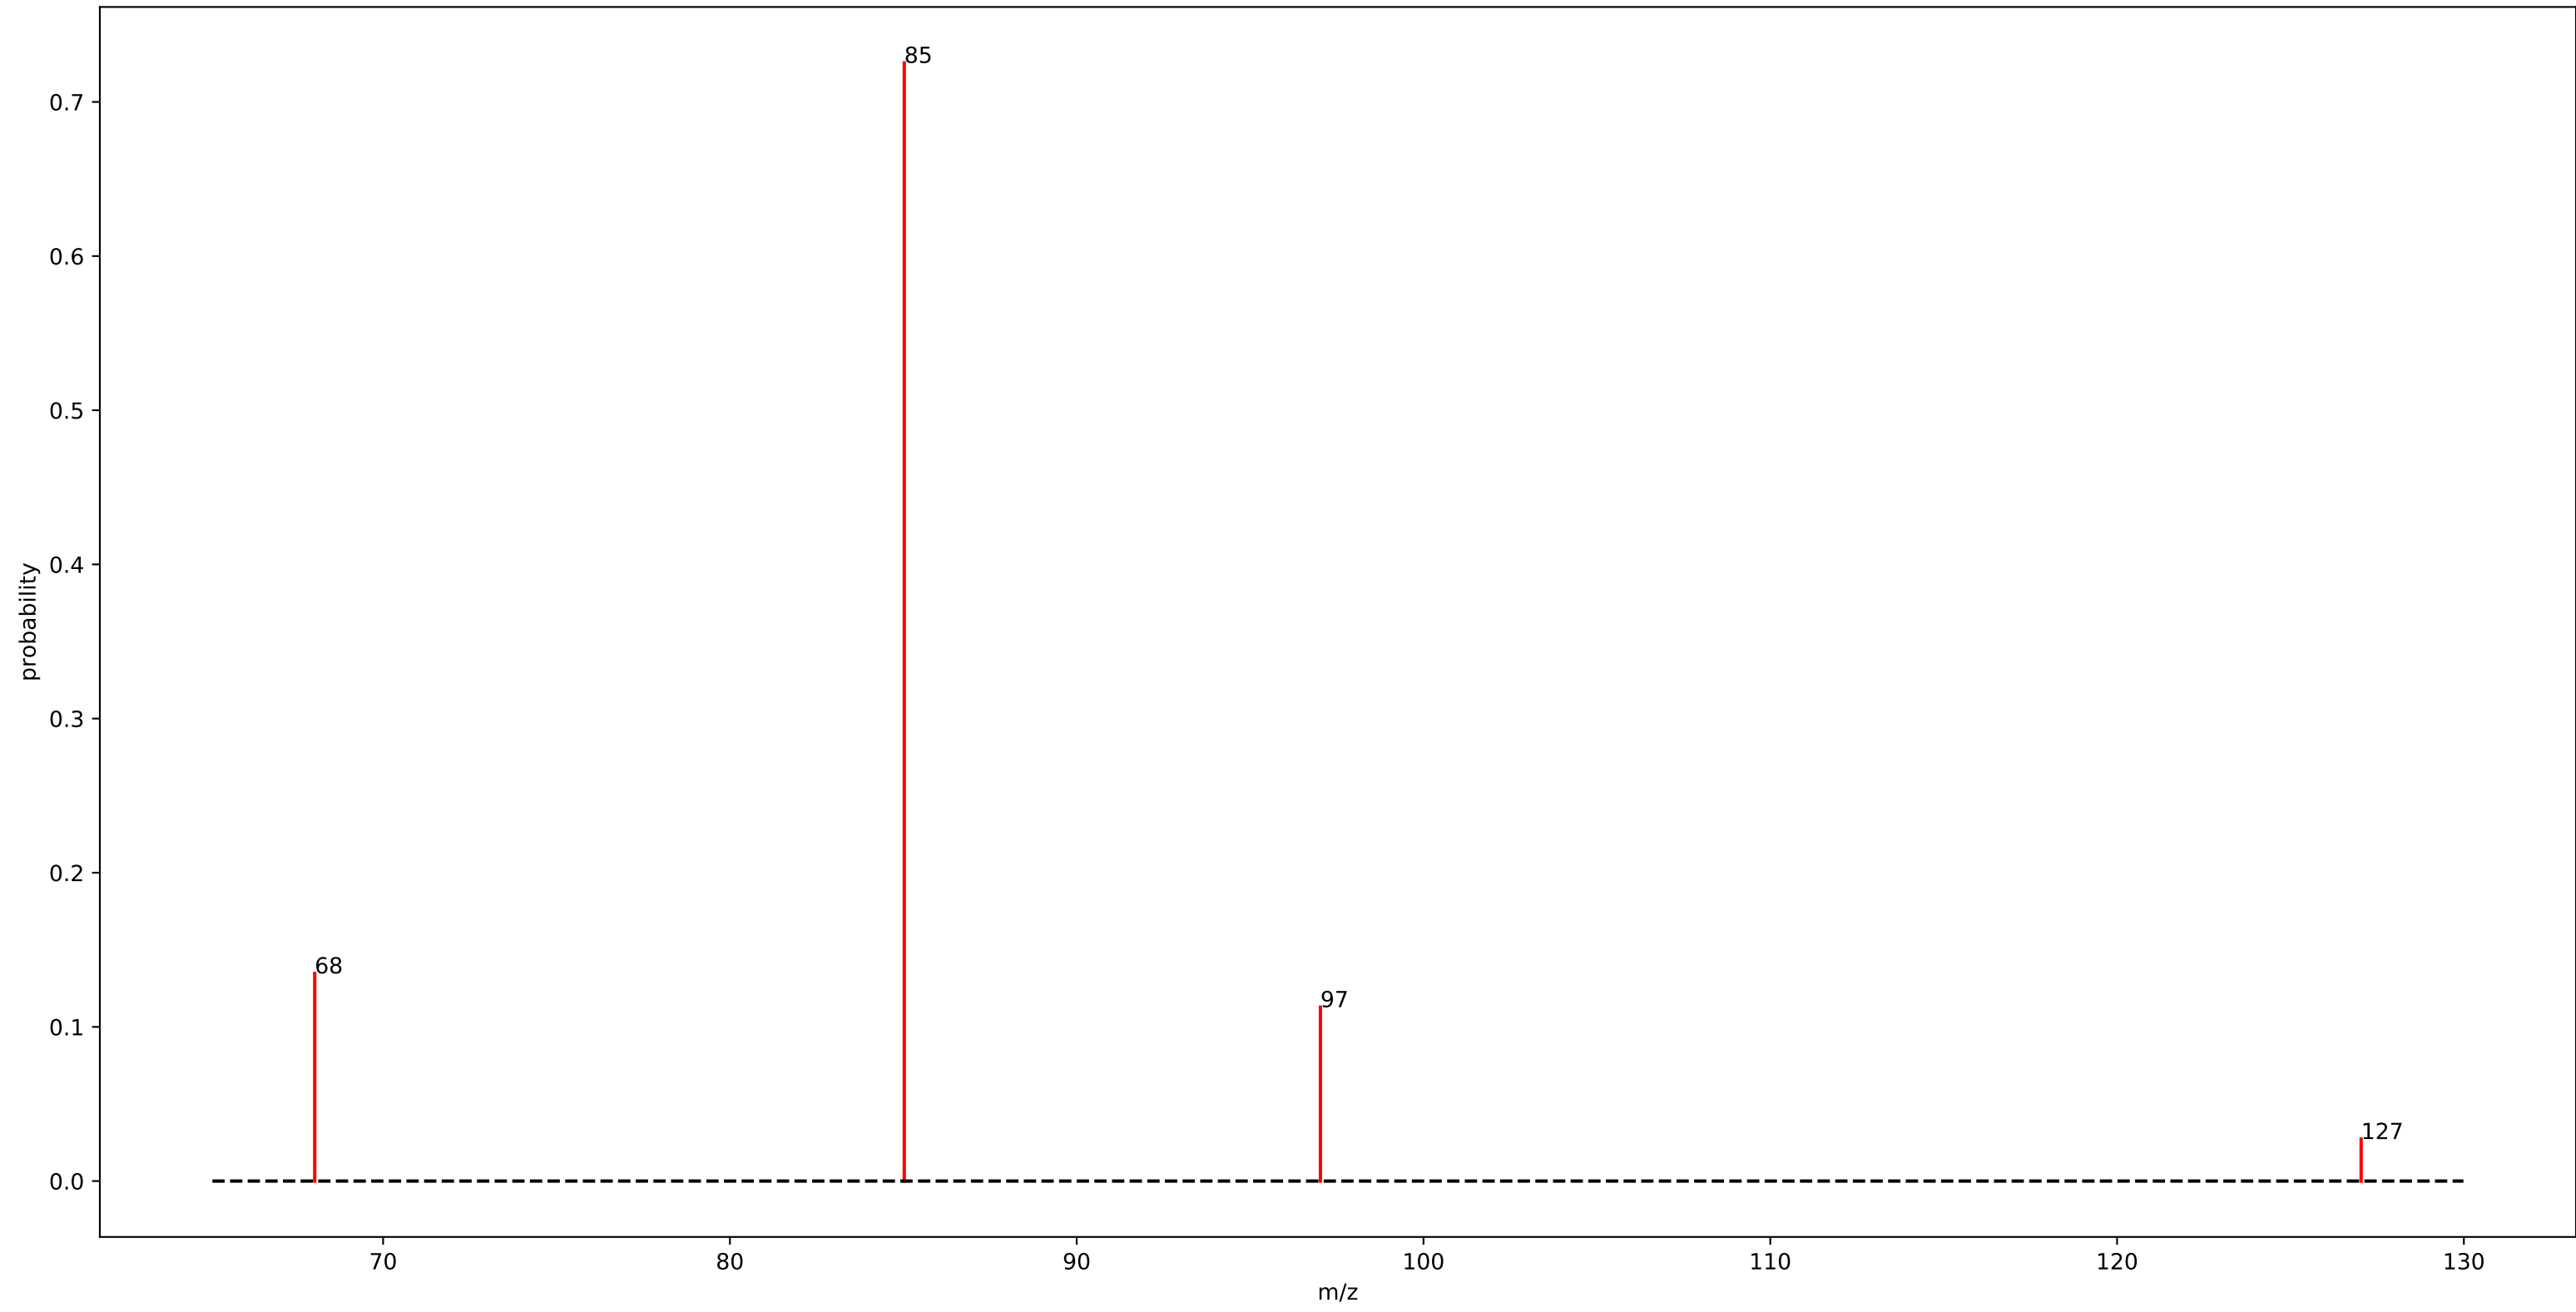

## gnps\_motif\_45.m2m

|                   |        |
|-------------------|--------|
| fragment_85.0275  | : 0.73 |
| fragment_68.0275  | : 0.13 |
| fragment_97.0275  | : 0.11 |
| fragment_127.0375 | : 0.03 |

urine\_mass2motif\_164.m2m

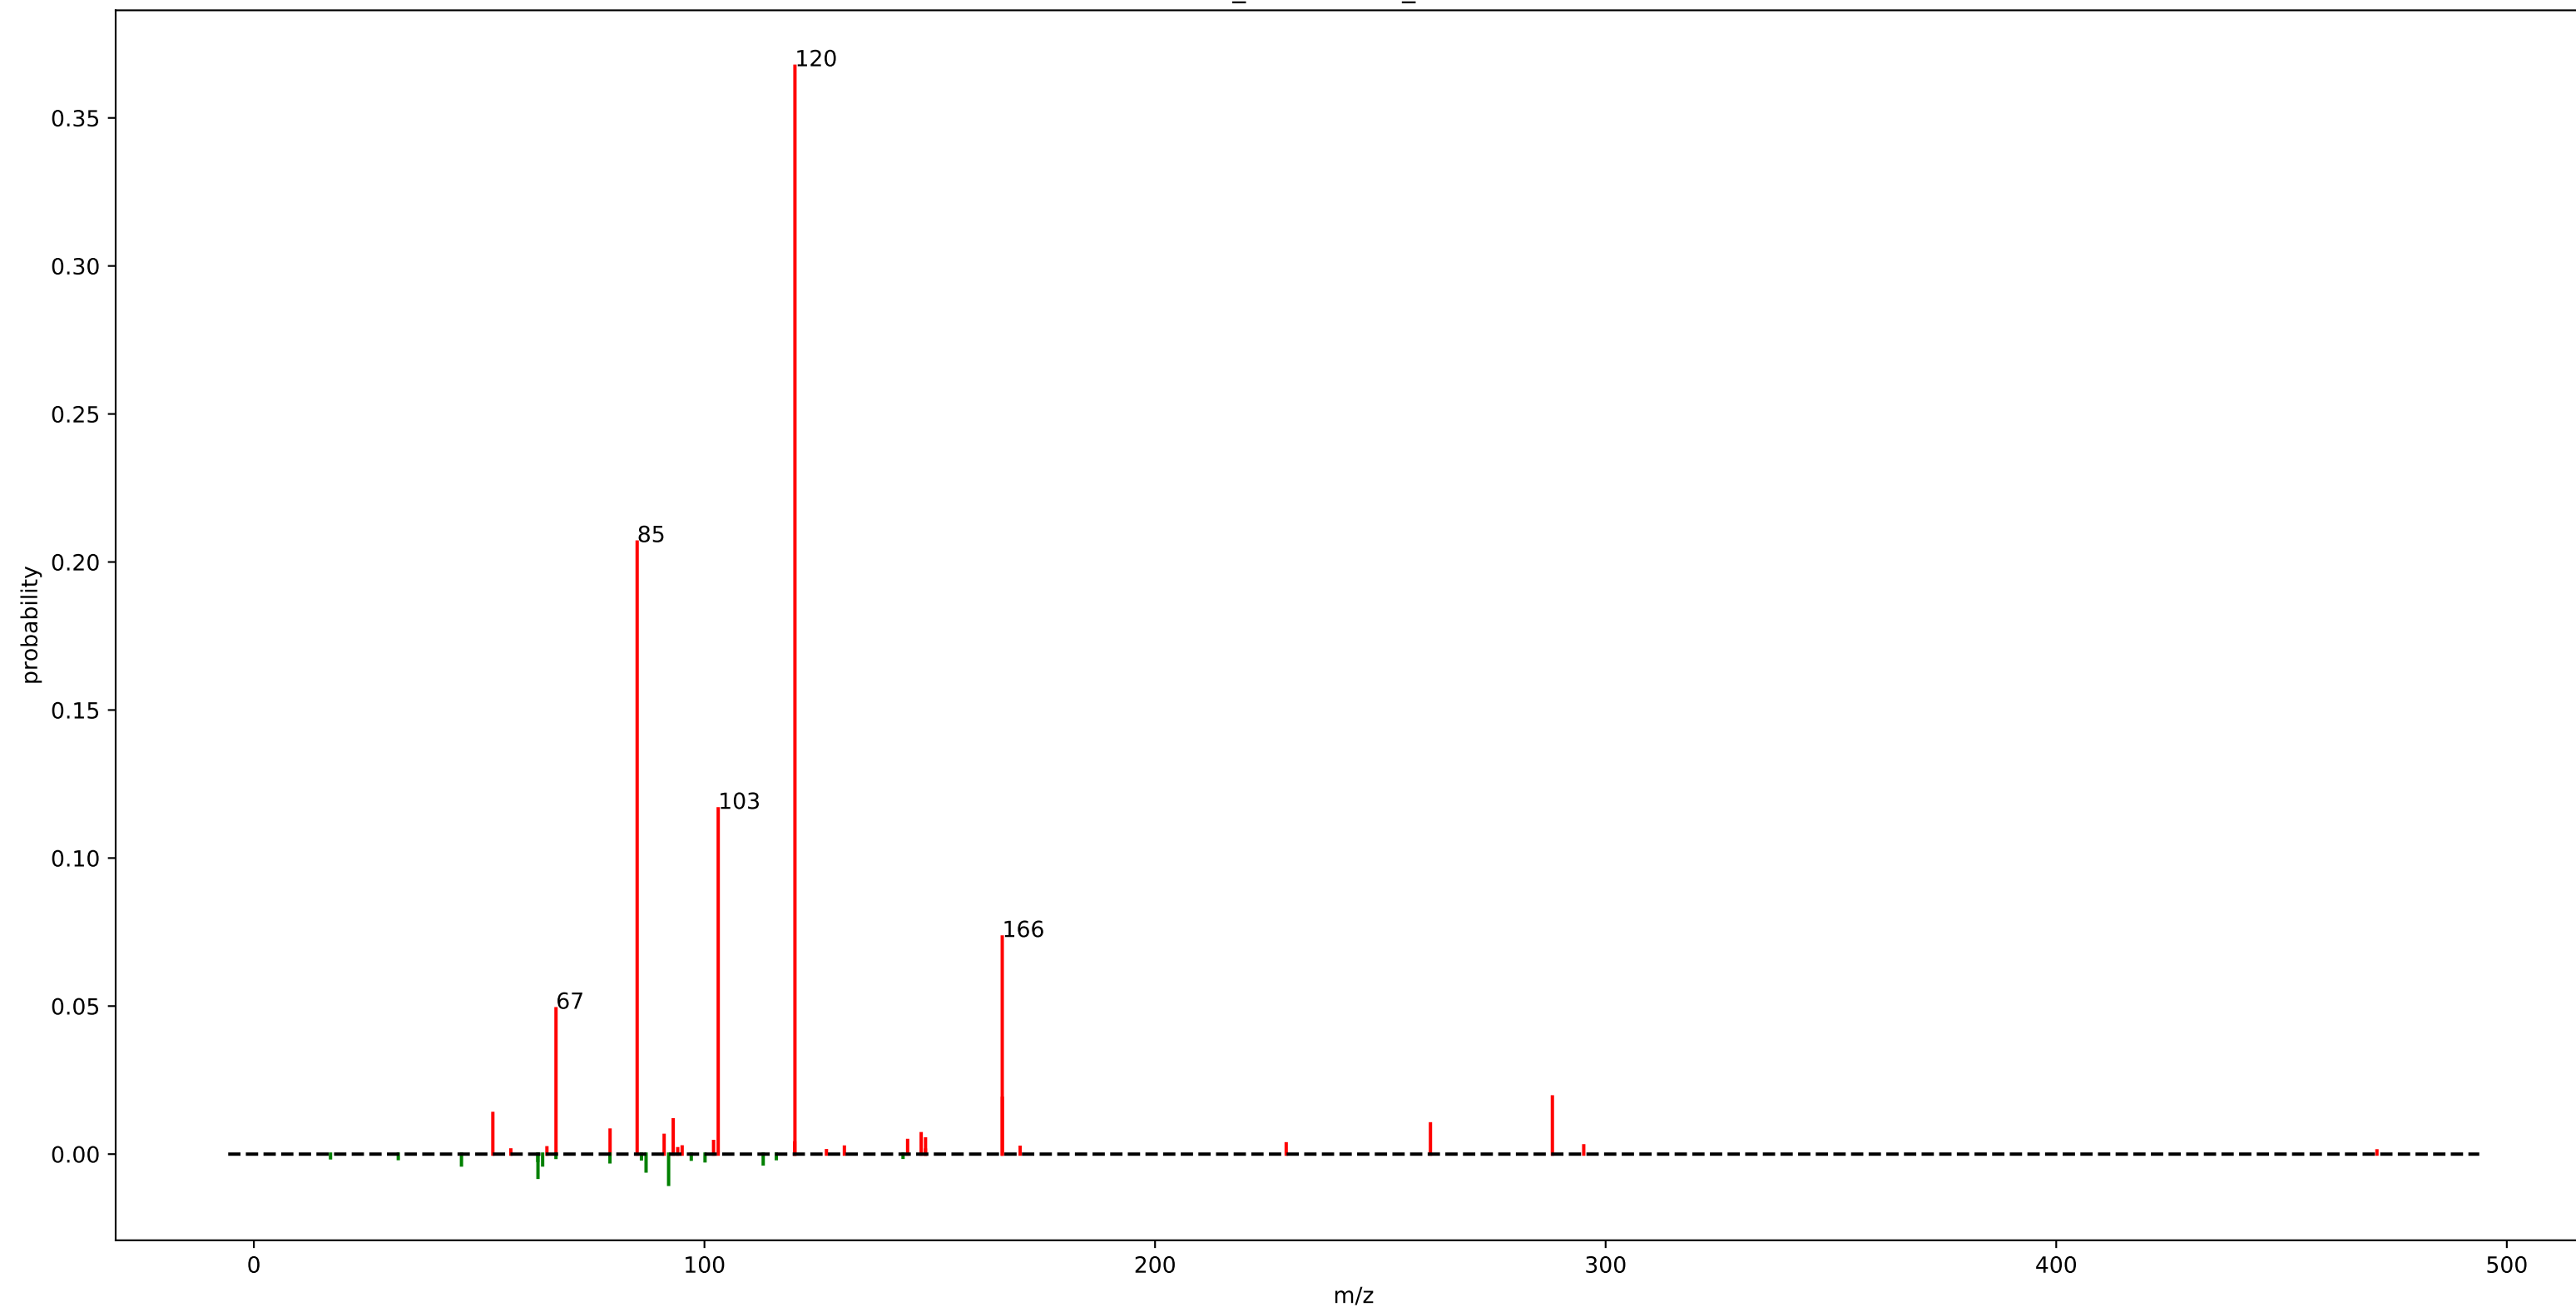

## urine\_mass2motif\_164.m2m

|                   |        |
|-------------------|--------|
| fragment_120.0825 | : 0.37 |
| fragment_85.0625  | : 0.21 |
| fragment_103.0525 | : 0.12 |
| fragment_166.0875 | : 0.07 |
| fragment_67.0525  | : 0.05 |
| fragment_288.1825 | : 0.02 |
| fragment_166.1075 | : 0.02 |
| fragment_53.0375  | : 0.01 |
| fragment_93.0675  | : 0.01 |
| fragment_261.1225 | : 0.01 |
| loss_92.0475      | : 0.01 |
| fragment_79.0525  | : 0.01 |
| loss_63.0525      | : 0.01 |
| fragment_148.0975 | : 0.01 |
| fragment_91.0525  | : 0.01 |
| loss_87.0425      | : 0.01 |
| fragment_149.0625 | : 0.01 |

urine\_mass2motif\_269.m2m

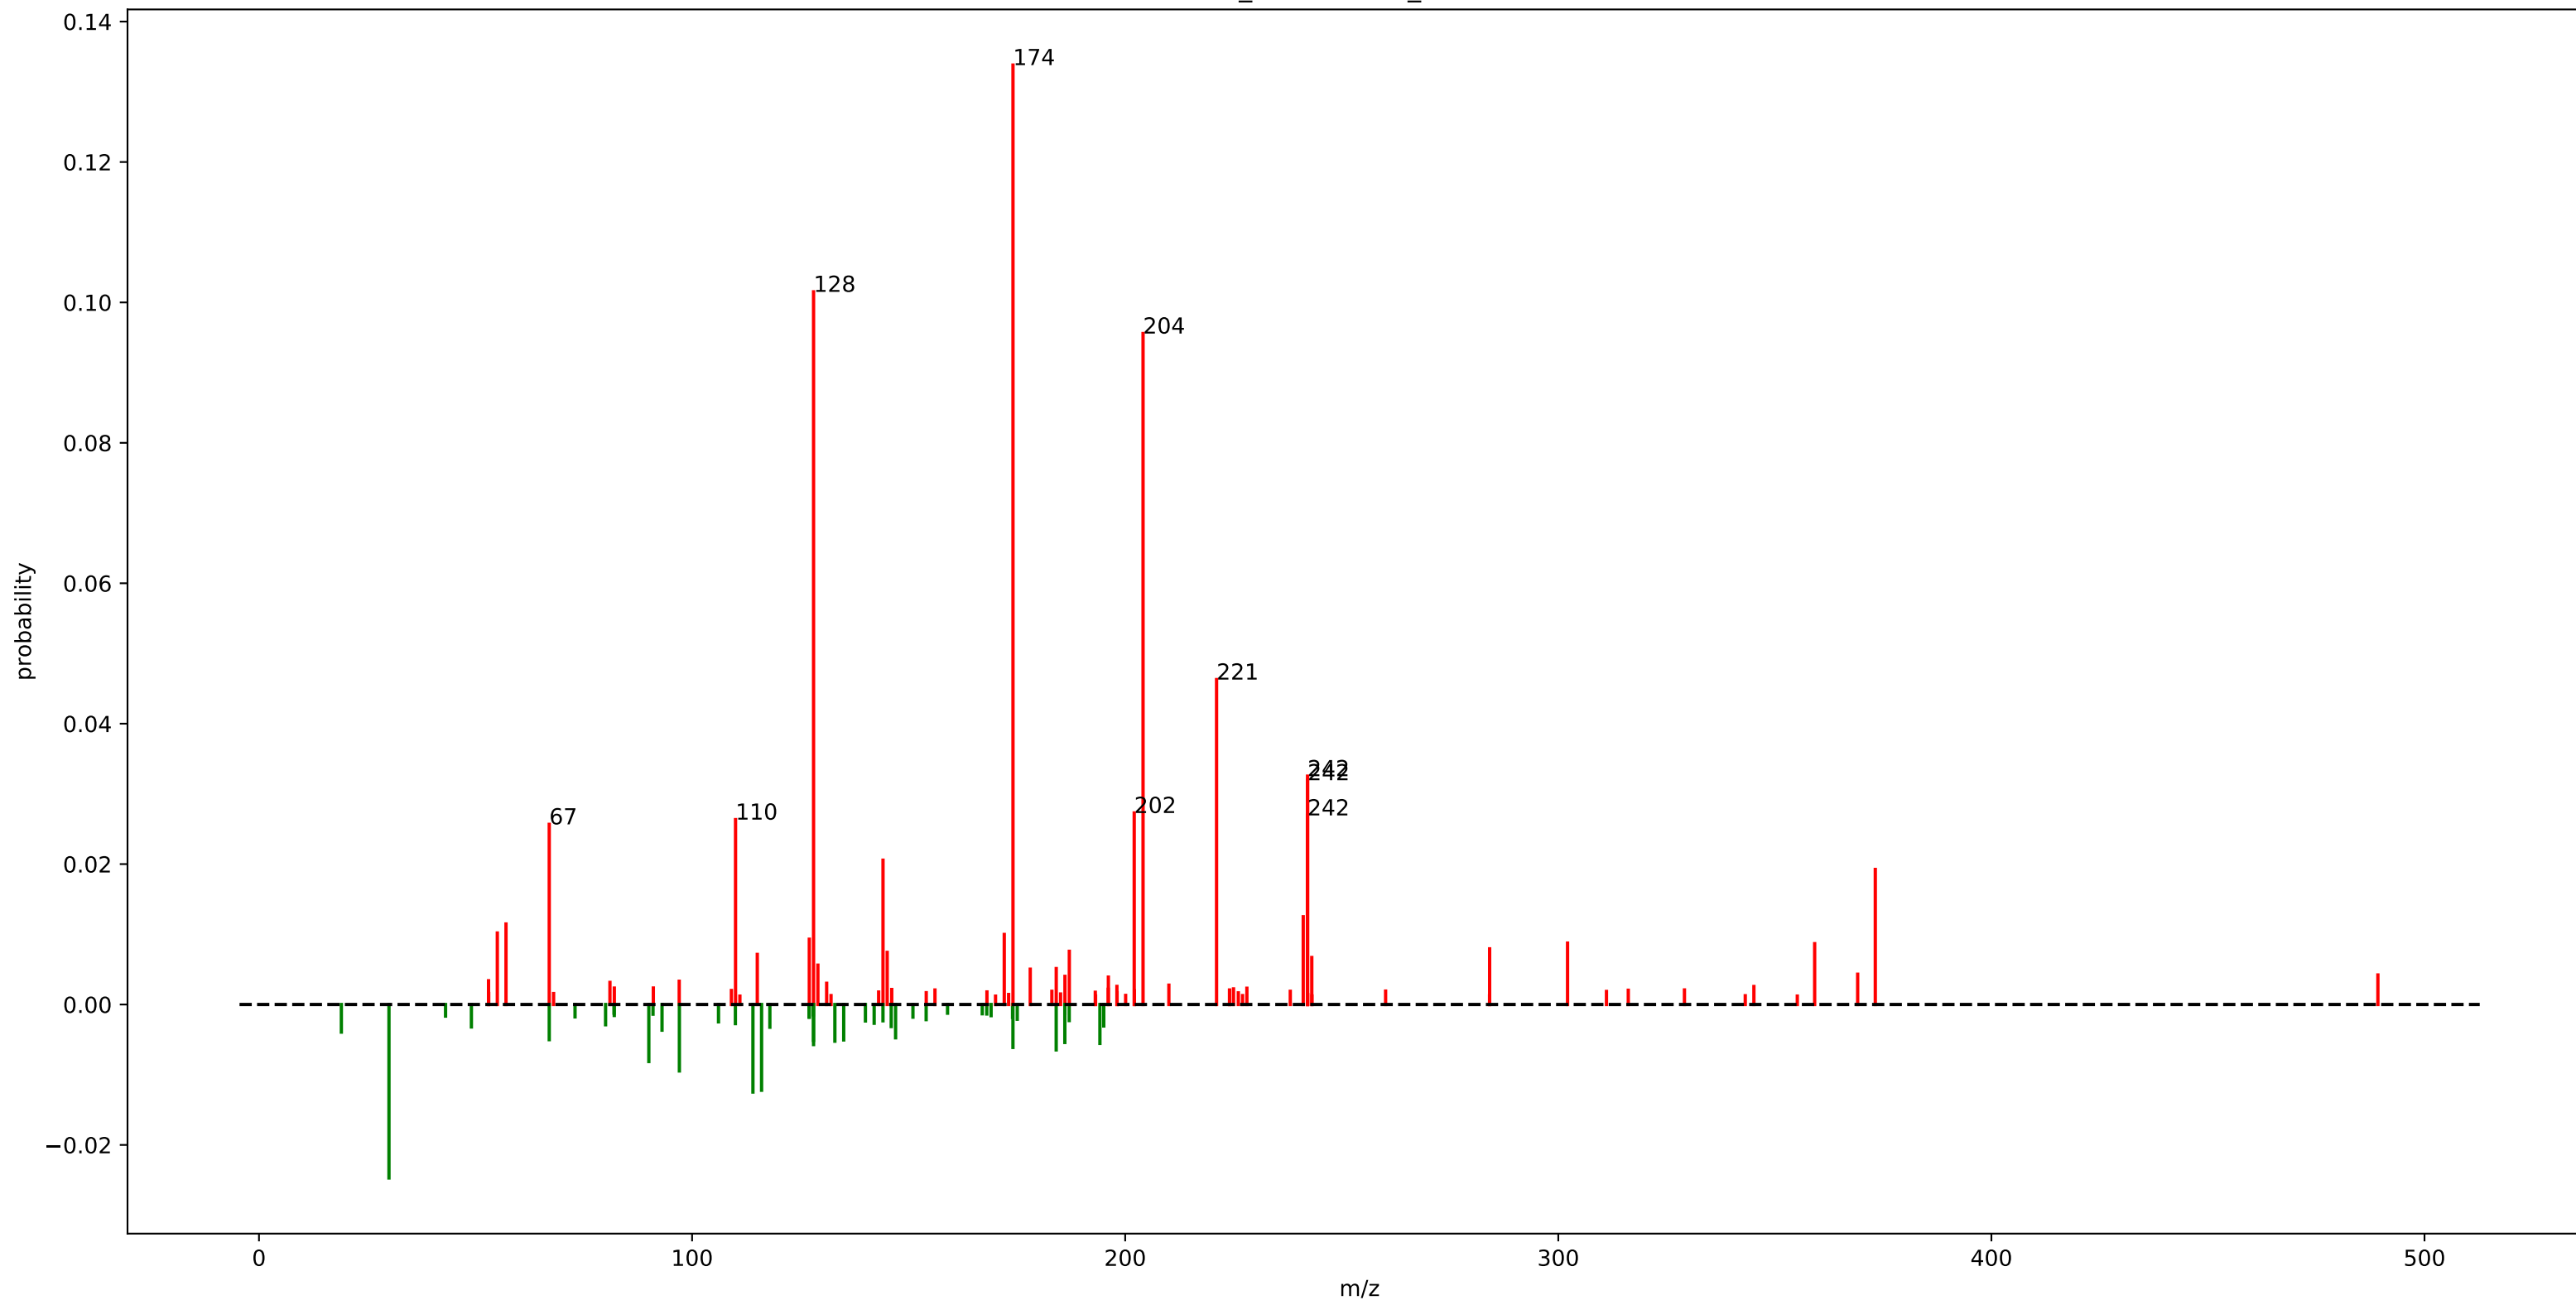

# urine\_mass2motif\_269.m2m

|                   |        |                   |        |              |        |
|-------------------|--------|-------------------|--------|--------------|--------|
| fragment_174.0925 | : 0.13 | fragment_127.0625 | : 0.01 | loss_67.0175 | : 0.01 |
| fragment_128.0475 | : 0.10 | fragment_302.1375 | : 0.01 |              |        |
| fragment_204.1225 | : 0.10 | fragment_359.1925 | : 0.01 |              |        |
| fragment_221.0975 | : 0.05 | loss_90.0125      | : 0.01 |              |        |
| fragment_242.1025 | : 0.03 | fragment_284.1475 | : 0.01 |              |        |
| fragment_242.1175 | : 0.03 | fragment_187.0975 | : 0.01 |              |        |
| fragment_202.0825 | : 0.03 | fragment_145.0475 | : 0.01 |              |        |
| fragment_242.0775 | : 0.03 | fragment_115.0525 | : 0.01 |              |        |
| fragment_110.0325 | : 0.03 | fragment_243.0825 | : 0.01 |              |        |
| fragment_67.0175  | : 0.03 | loss_184.0675     | : 0.01 |              |        |
| loss_30.0125      | : 0.02 | loss_174.0825     | : 0.01 |              |        |
| fragment_144.0825 | : 0.02 | loss_128.0475     | : 0.01 |              |        |
| fragment_373.1925 | : 0.02 | fragment_129.0475 | : 0.01 |              |        |
| fragment_241.1075 | : 0.01 | loss_194.1625     | : 0.01 |              |        |
| loss_114.0475     | : 0.01 | loss_186.0625     | : 0.01 |              |        |
| loss_116.0425     | : 0.01 | loss_132.9675     | : 0.01 |              |        |
| fragment_57.0325  | : 0.01 | fragment_184.0775 | : 0.01 |              |        |
| fragment_55.0275  | : 0.01 | loss_128.0325     | : 0.01 |              |        |
| fragment_172.0775 | : 0.01 | loss_135.0075     | : 0.01 |              |        |
| loss_97.0625      | : 0.01 | fragment_178.0775 | : 0.01 |              |        |



motif\_435

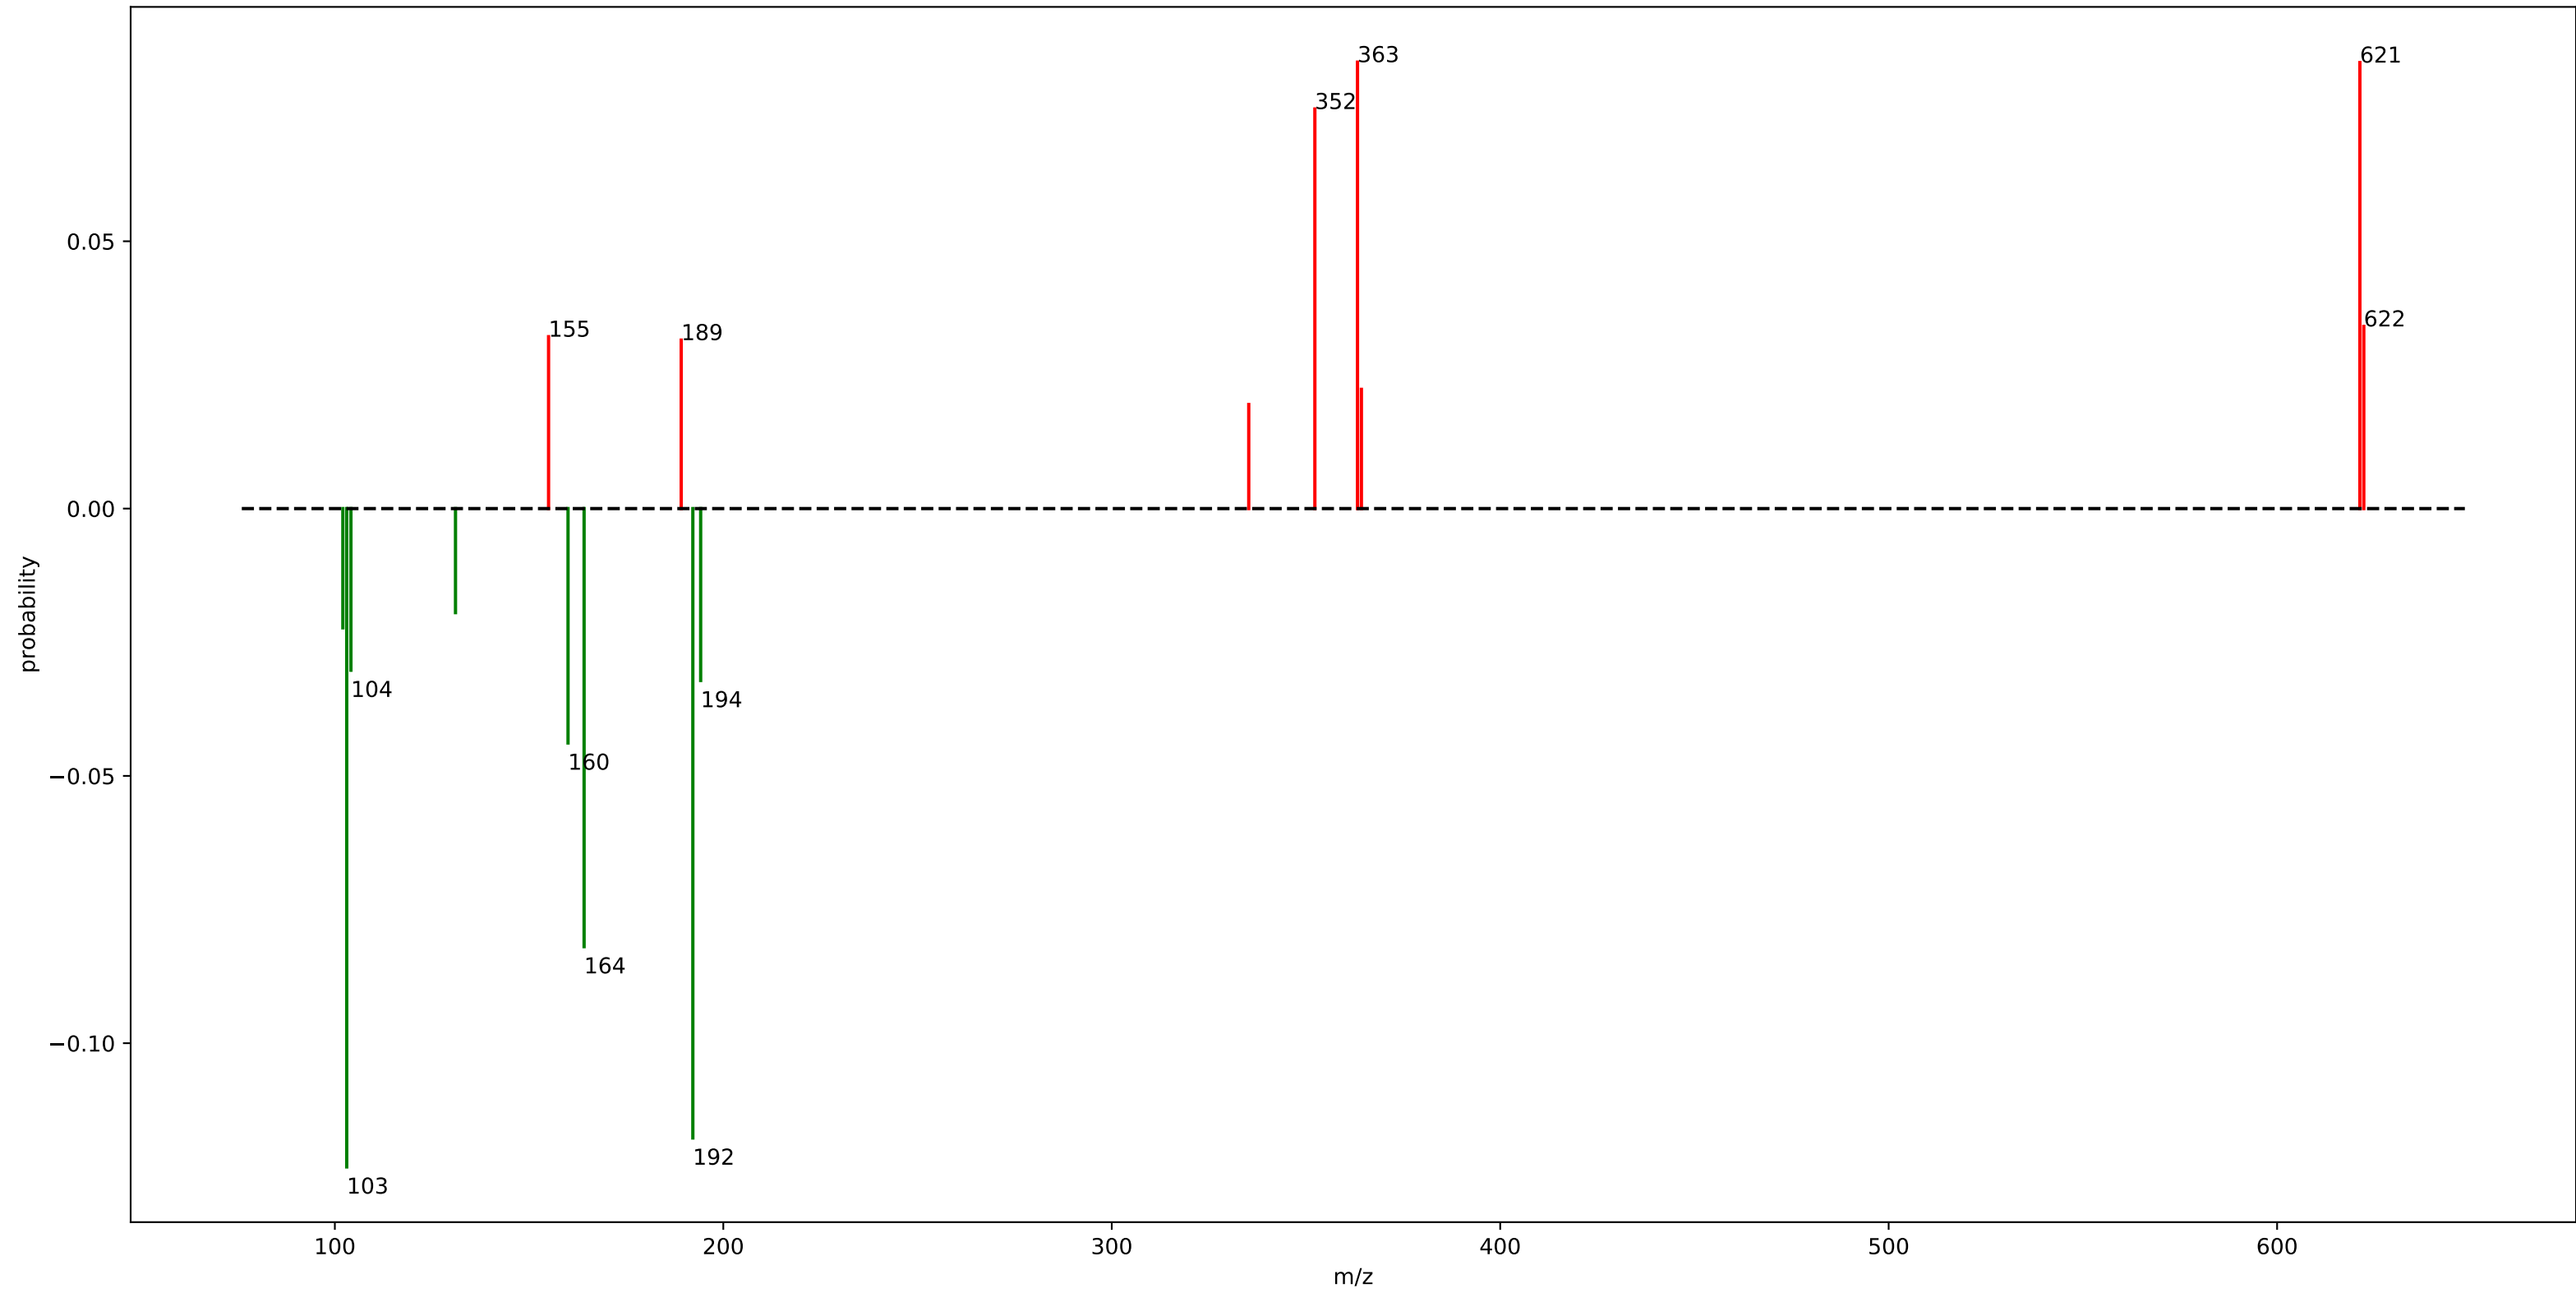

## motif\_435

|                   |        |
|-------------------|--------|
| loss_103.0625     | : 0.12 |
| loss_192.1575     | : 0.12 |
| fragment_363.2625 | : 0.08 |
| fragment_621.3125 | : 0.08 |
| loss_164.1625     | : 0.08 |
| fragment_352.2875 | : 0.07 |
| loss_160.0275     | : 0.04 |
| fragment_622.3175 | : 0.03 |
| loss_194.1725     | : 0.03 |
| fragment_155.0175 | : 0.03 |
| fragment_189.1625 | : 0.03 |
| loss_104.1375     | : 0.03 |
| fragment_364.2675 | : 0.02 |
| loss_102.0575     | : 0.02 |
| loss_131.0575     | : 0.02 |
| fragment_335.2675 | : 0.02 |

urine\_mass2motif\_165.m2m

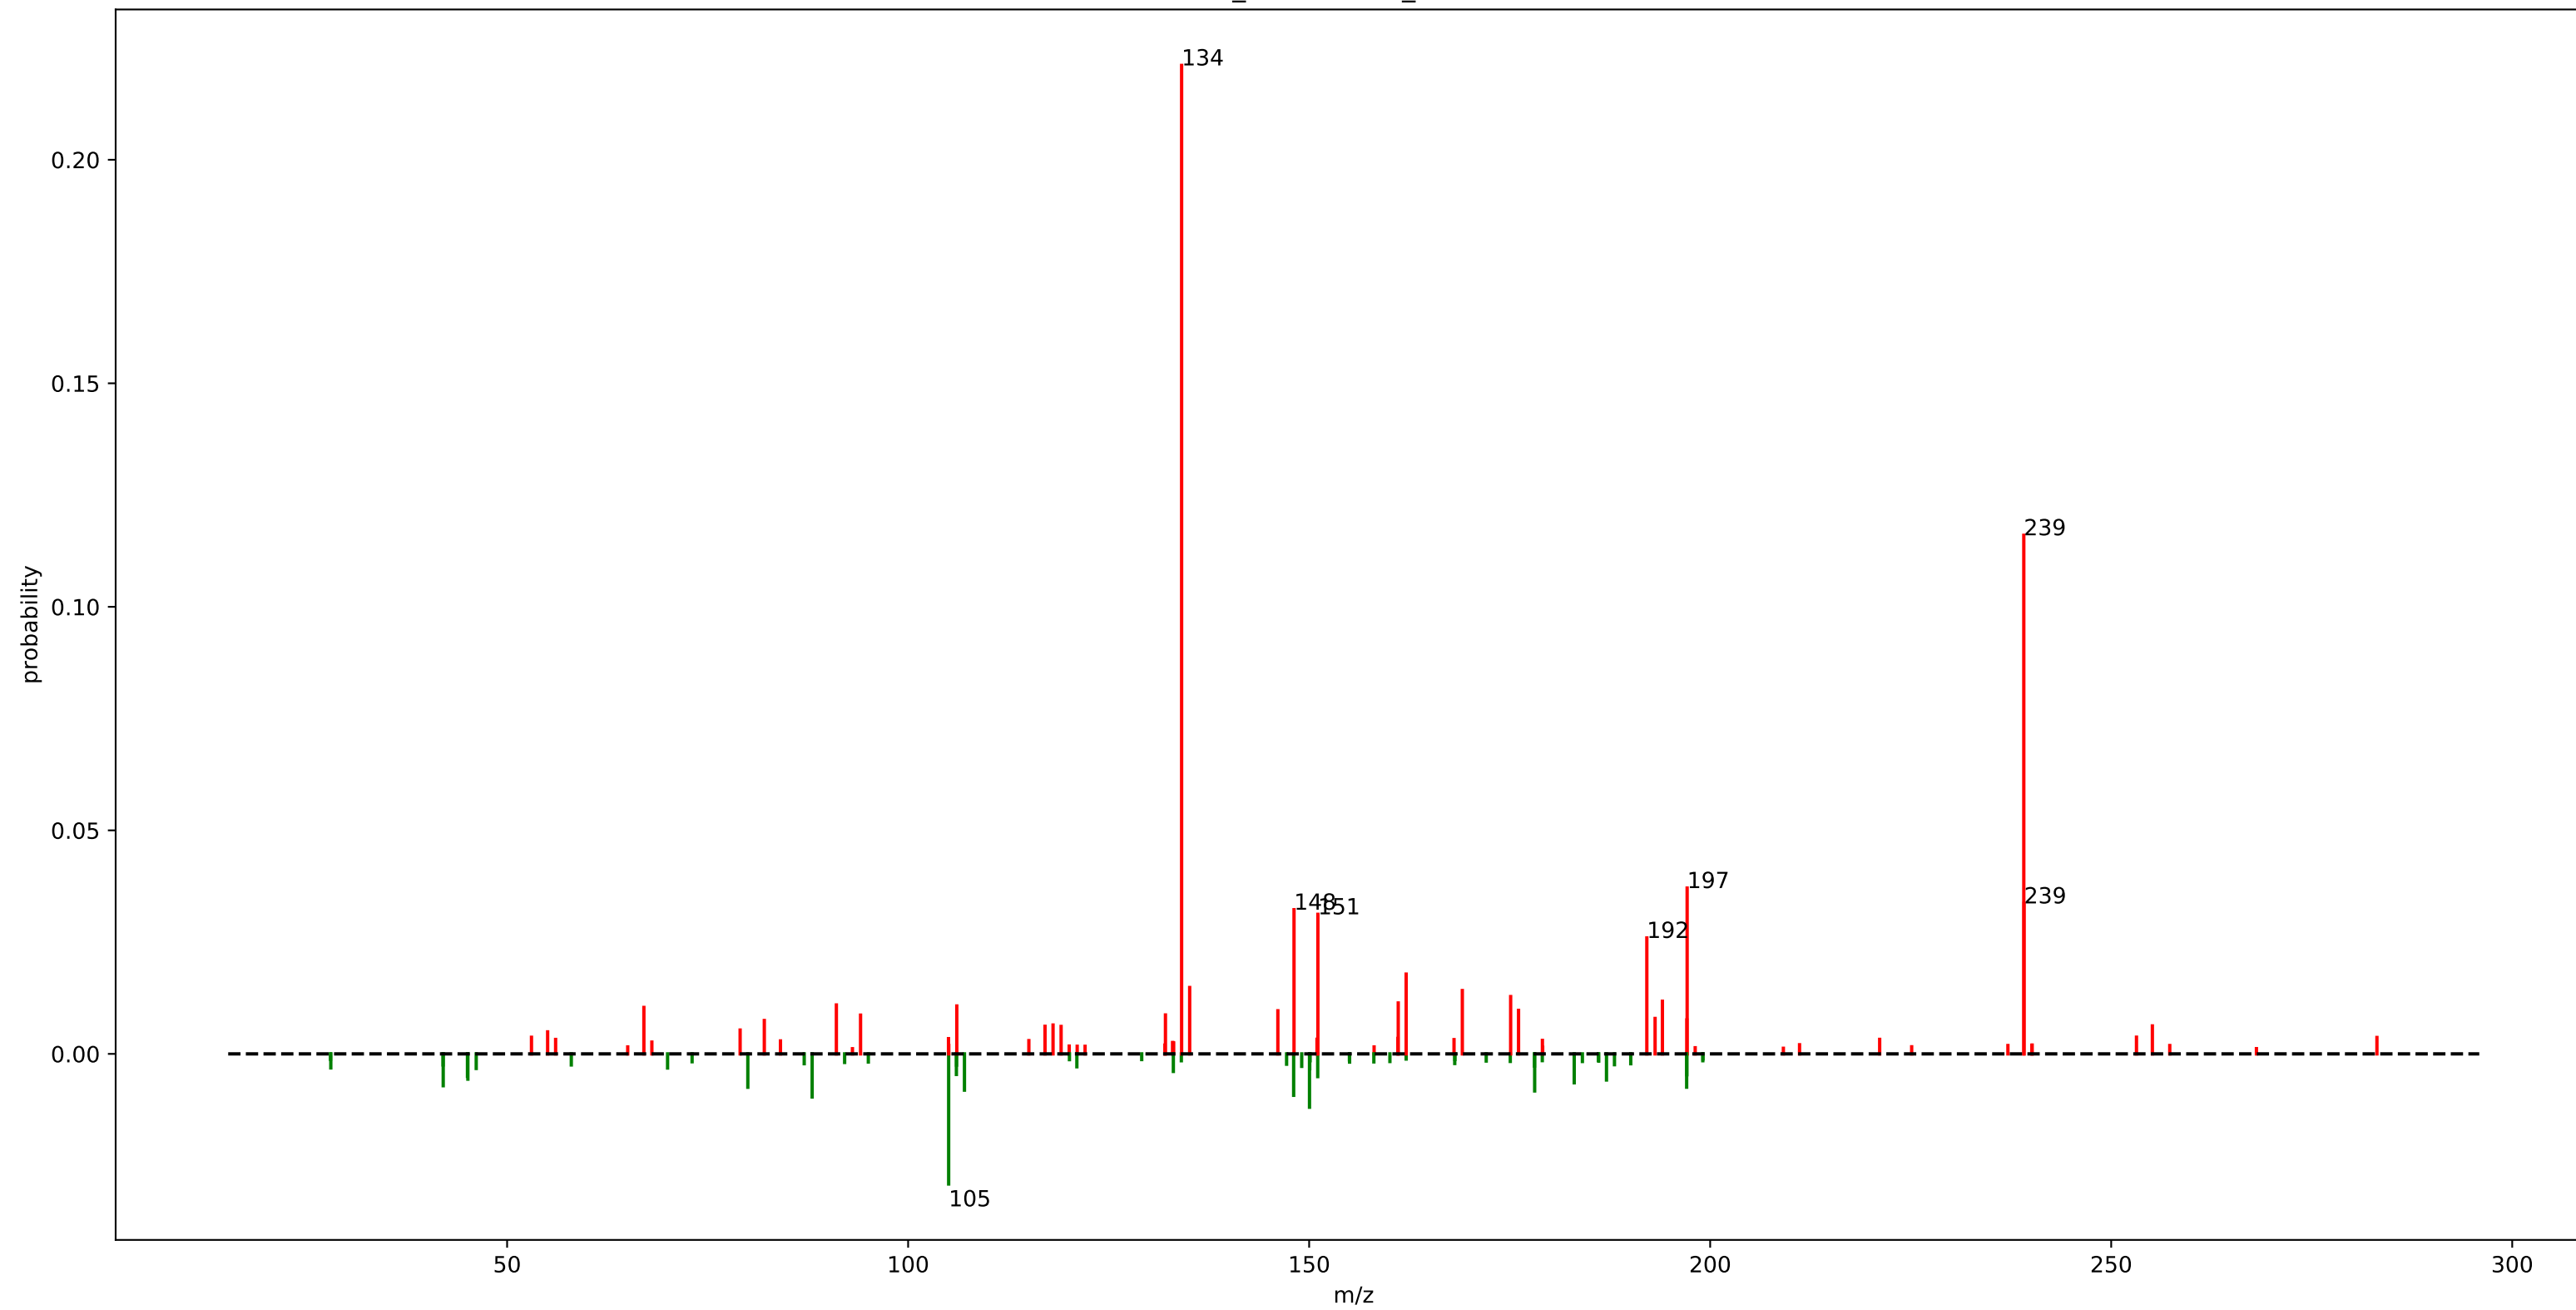

# urine\_mass2motif\_165.m2m

|                   |        |                   |        |               |        |
|-------------------|--------|-------------------|--------|---------------|--------|
| fragment_134.0975 | : 0.22 | loss_88.0325      | : 0.01 | loss_151.0675 | : 0.01 |
| fragment_239.1025 | : 0.12 | loss_148.0675     | : 0.01 | loss_45.0575  | : 0.01 |
| fragment_197.1275 | : 0.04 | fragment_132.0825 | : 0.01 |               |        |
| fragment_239.1375 | : 0.03 | fragment_94.0675  | : 0.01 |               |        |
| fragment_148.1125 | : 0.03 | loss_178.1175     | : 0.01 |               |        |
| fragment_151.0875 | : 0.03 | loss_107.0225     | : 0.01 |               |        |
| loss_105.0525     | : 0.03 | fragment_193.1325 | : 0.01 |               |        |
| fragment_192.1025 | : 0.03 | fragment_197.0925 | : 0.01 |               |        |
| fragment_162.0925 | : 0.02 | fragment_82.0675  | : 0.01 |               |        |
| fragment_135.1025 | : 0.01 | loss_80.0125      | : 0.01 |               |        |
| fragment_169.0975 | : 0.01 | loss_197.0675     | : 0.01 |               |        |
| fragment_175.1225 | : 0.01 | loss_42.0325      | : 0.01 |               |        |
| loss_150.0425     | : 0.01 | loss_183.0475     | : 0.01 |               |        |
| fragment_194.0425 | : 0.01 | fragment_118.0675 | : 0.01 |               |        |
| fragment_161.1075 | : 0.01 | fragment_255.1325 | : 0.01 |               |        |
| fragment_91.0525  | : 0.01 | fragment_117.0675 | : 0.01 |               |        |
| fragment_106.0675 | : 0.01 | fragment_119.0725 | : 0.01 |               |        |
| fragment_67.0525  | : 0.01 | loss_187.0725     | : 0.01 |               |        |
| fragment_176.1075 | : 0.01 | loss_45.1075      | : 0.01 |               |        |
| fragment_146.0975 | : 0.01 | fragment_79.0525  | : 0.01 |               |        |

euphorbia\_motif\_162.m2m

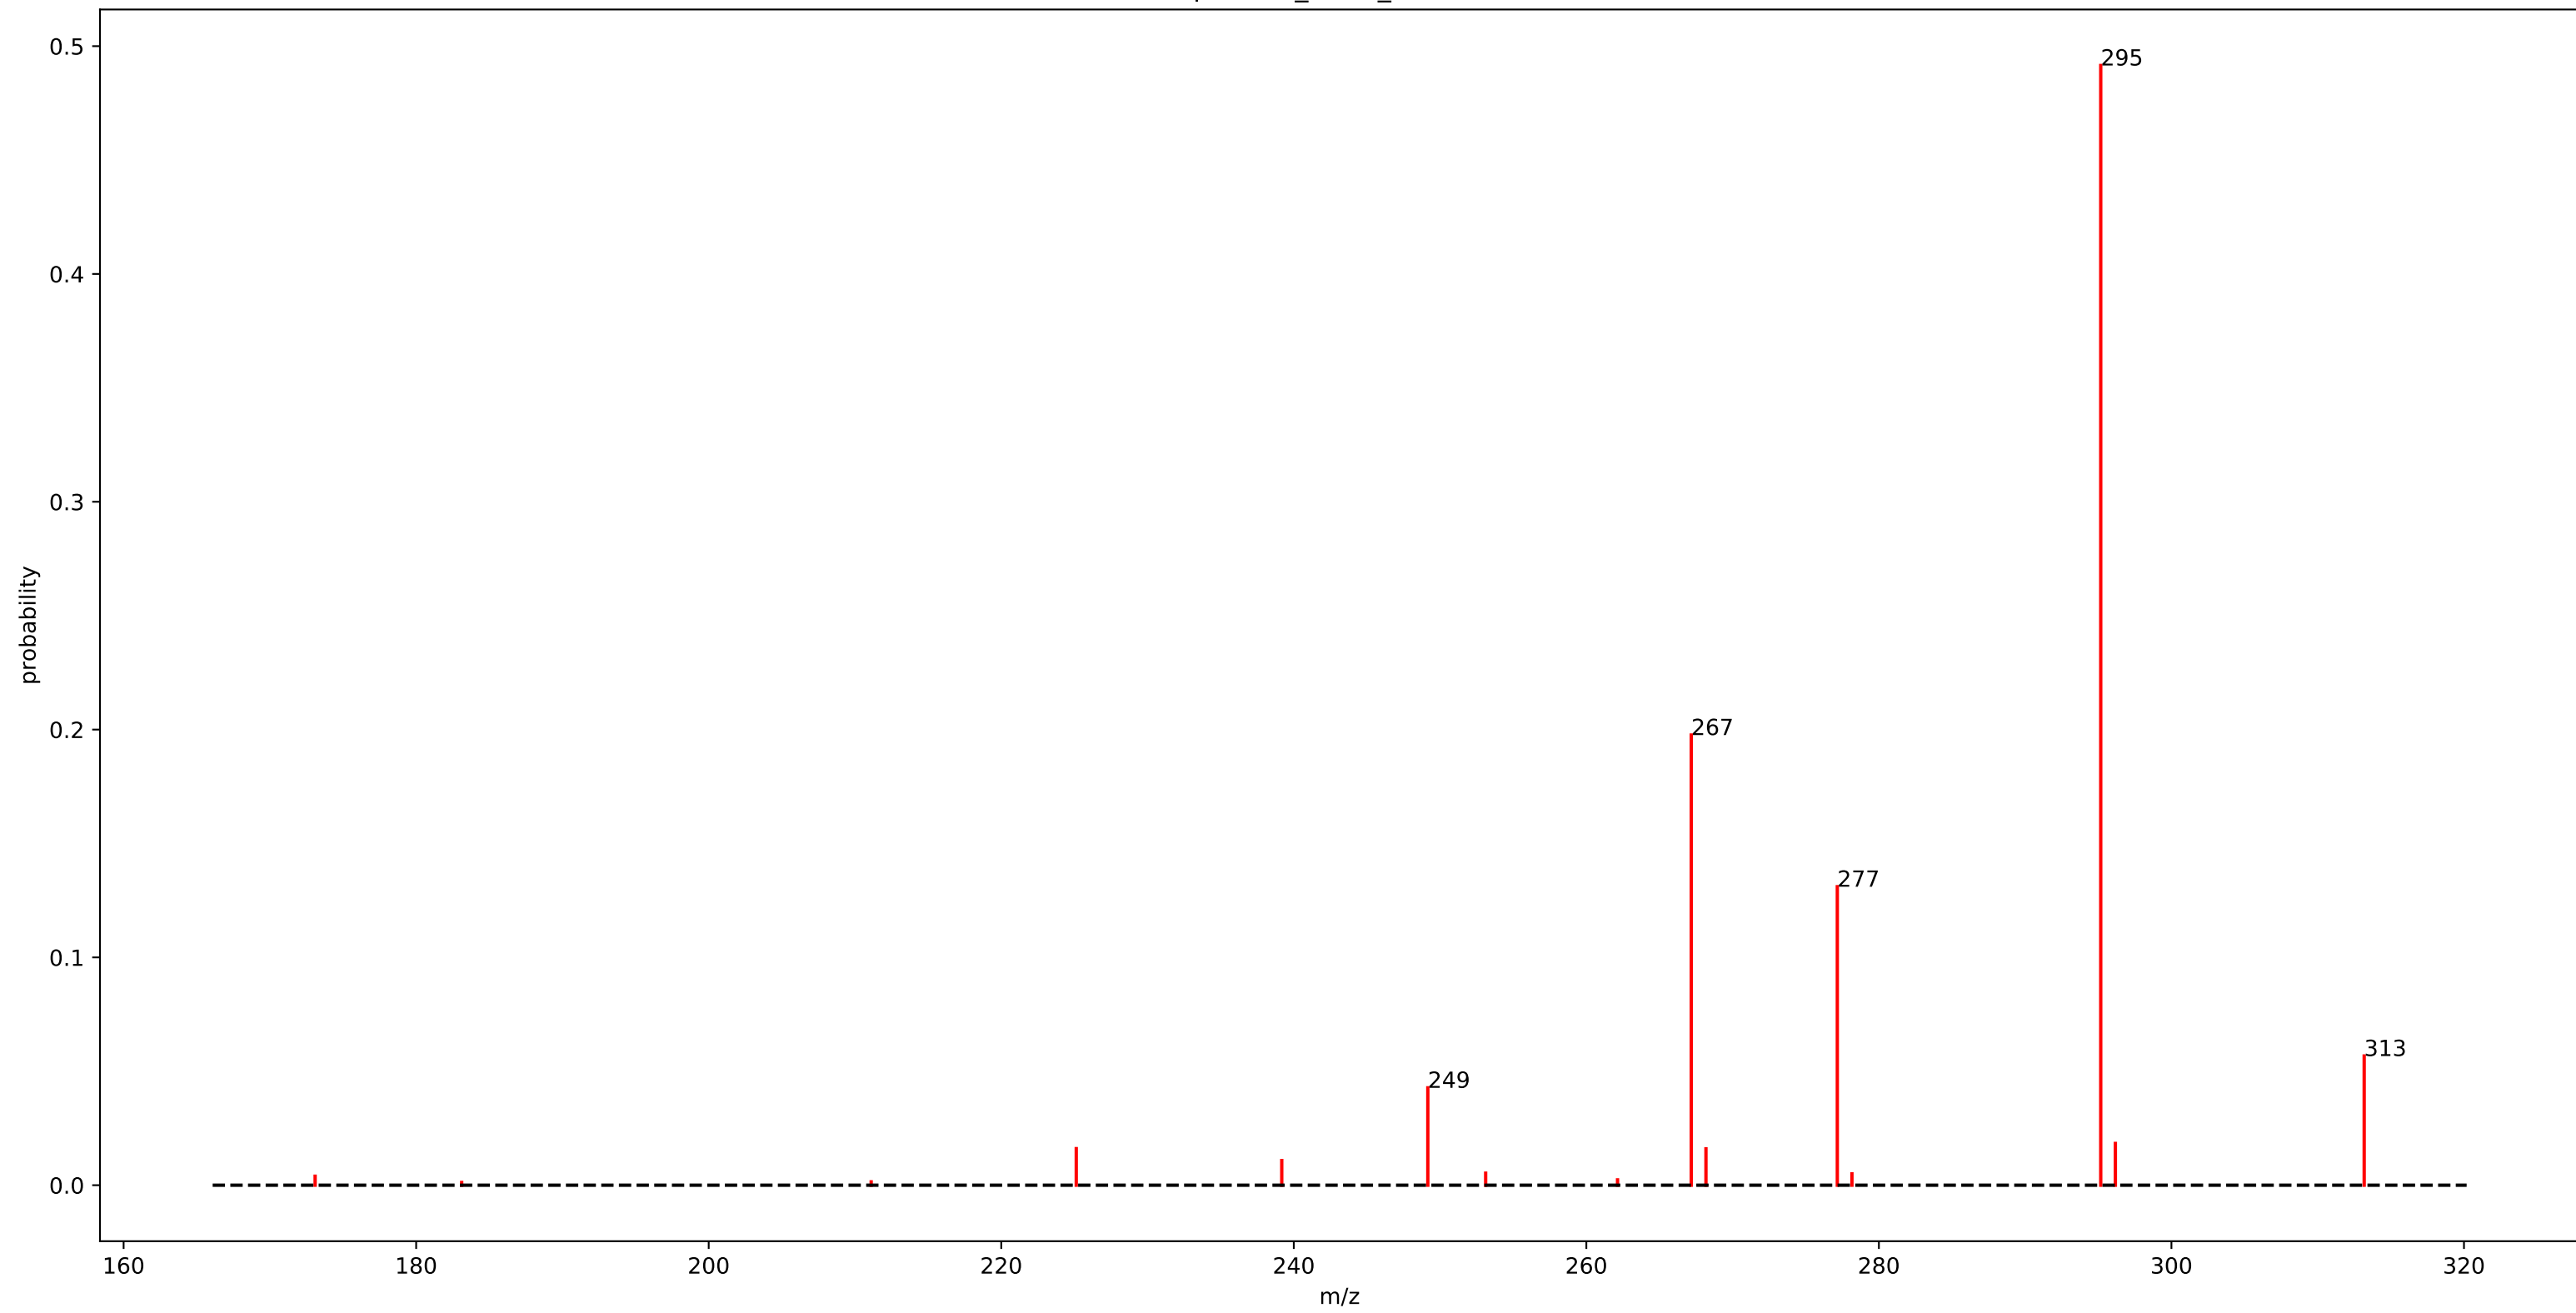

## euphorbia\_motif\_162.m2m

|                   |        |
|-------------------|--------|
| fragment_295.1675 | : 0.49 |
| fragment_267.1725 | : 0.20 |
| fragment_277.1575 | : 0.13 |
| fragment_313.1775 | : 0.06 |
| fragment_249.1625 | : 0.04 |
| fragment_296.1675 | : 0.02 |
| fragment_225.1275 | : 0.02 |
| fragment_268.1775 | : 0.02 |
| fragment_239.1775 | : 0.01 |
| fragment_253.1175 | : 0.01 |

motif\_436

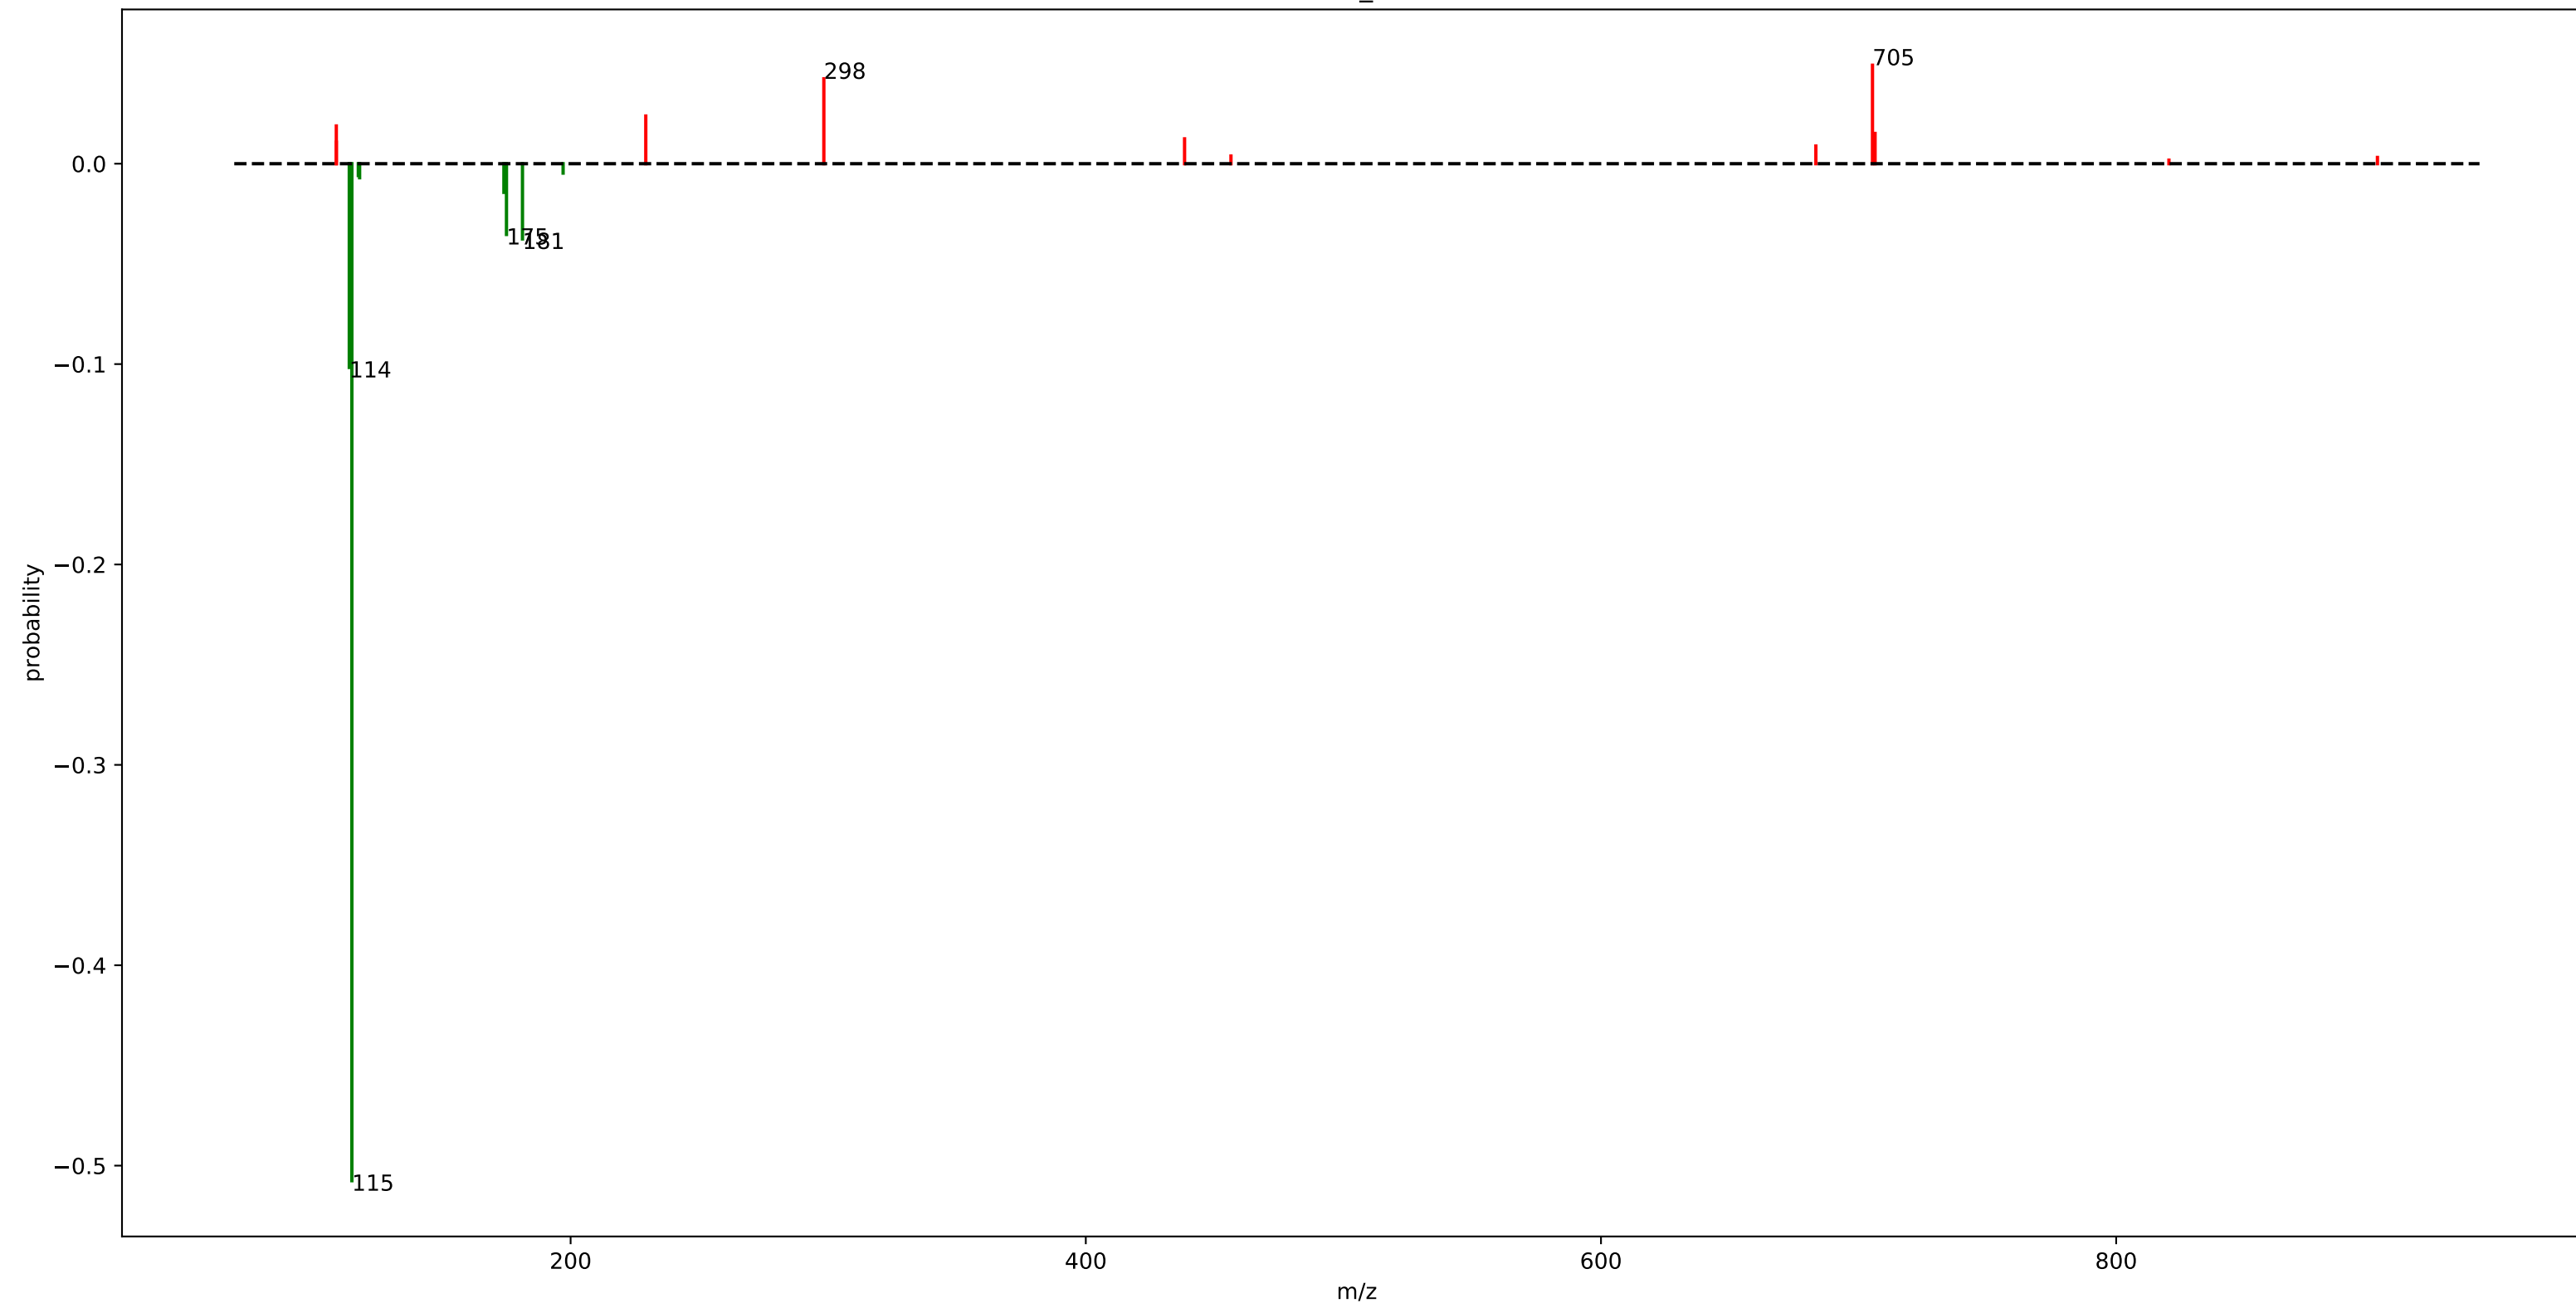

## motif\_436

|                   |        |
|-------------------|--------|
| loss_115.0825     | : 0.51 |
| loss_114.0775     | : 0.10 |
| fragment_705.3975 | : 0.05 |
| fragment_298.3075 | : 0.04 |
| loss_181.3125     | : 0.04 |
| loss_175.1025     | : 0.04 |
| fragment_229.1825 | : 0.02 |
| fragment_109.0425 | : 0.02 |
| fragment_706.4025 | : 0.02 |
| loss_174.1025     | : 0.01 |
| fragment_438.3425 | : 0.01 |
| fragment_109.0575 | : 0.01 |
| fragment_683.4175 | : 0.01 |
| loss_118.0925     | : 0.01 |
| loss_117.5875     | : 0.01 |



urine\_mass2motif\_183.m2m

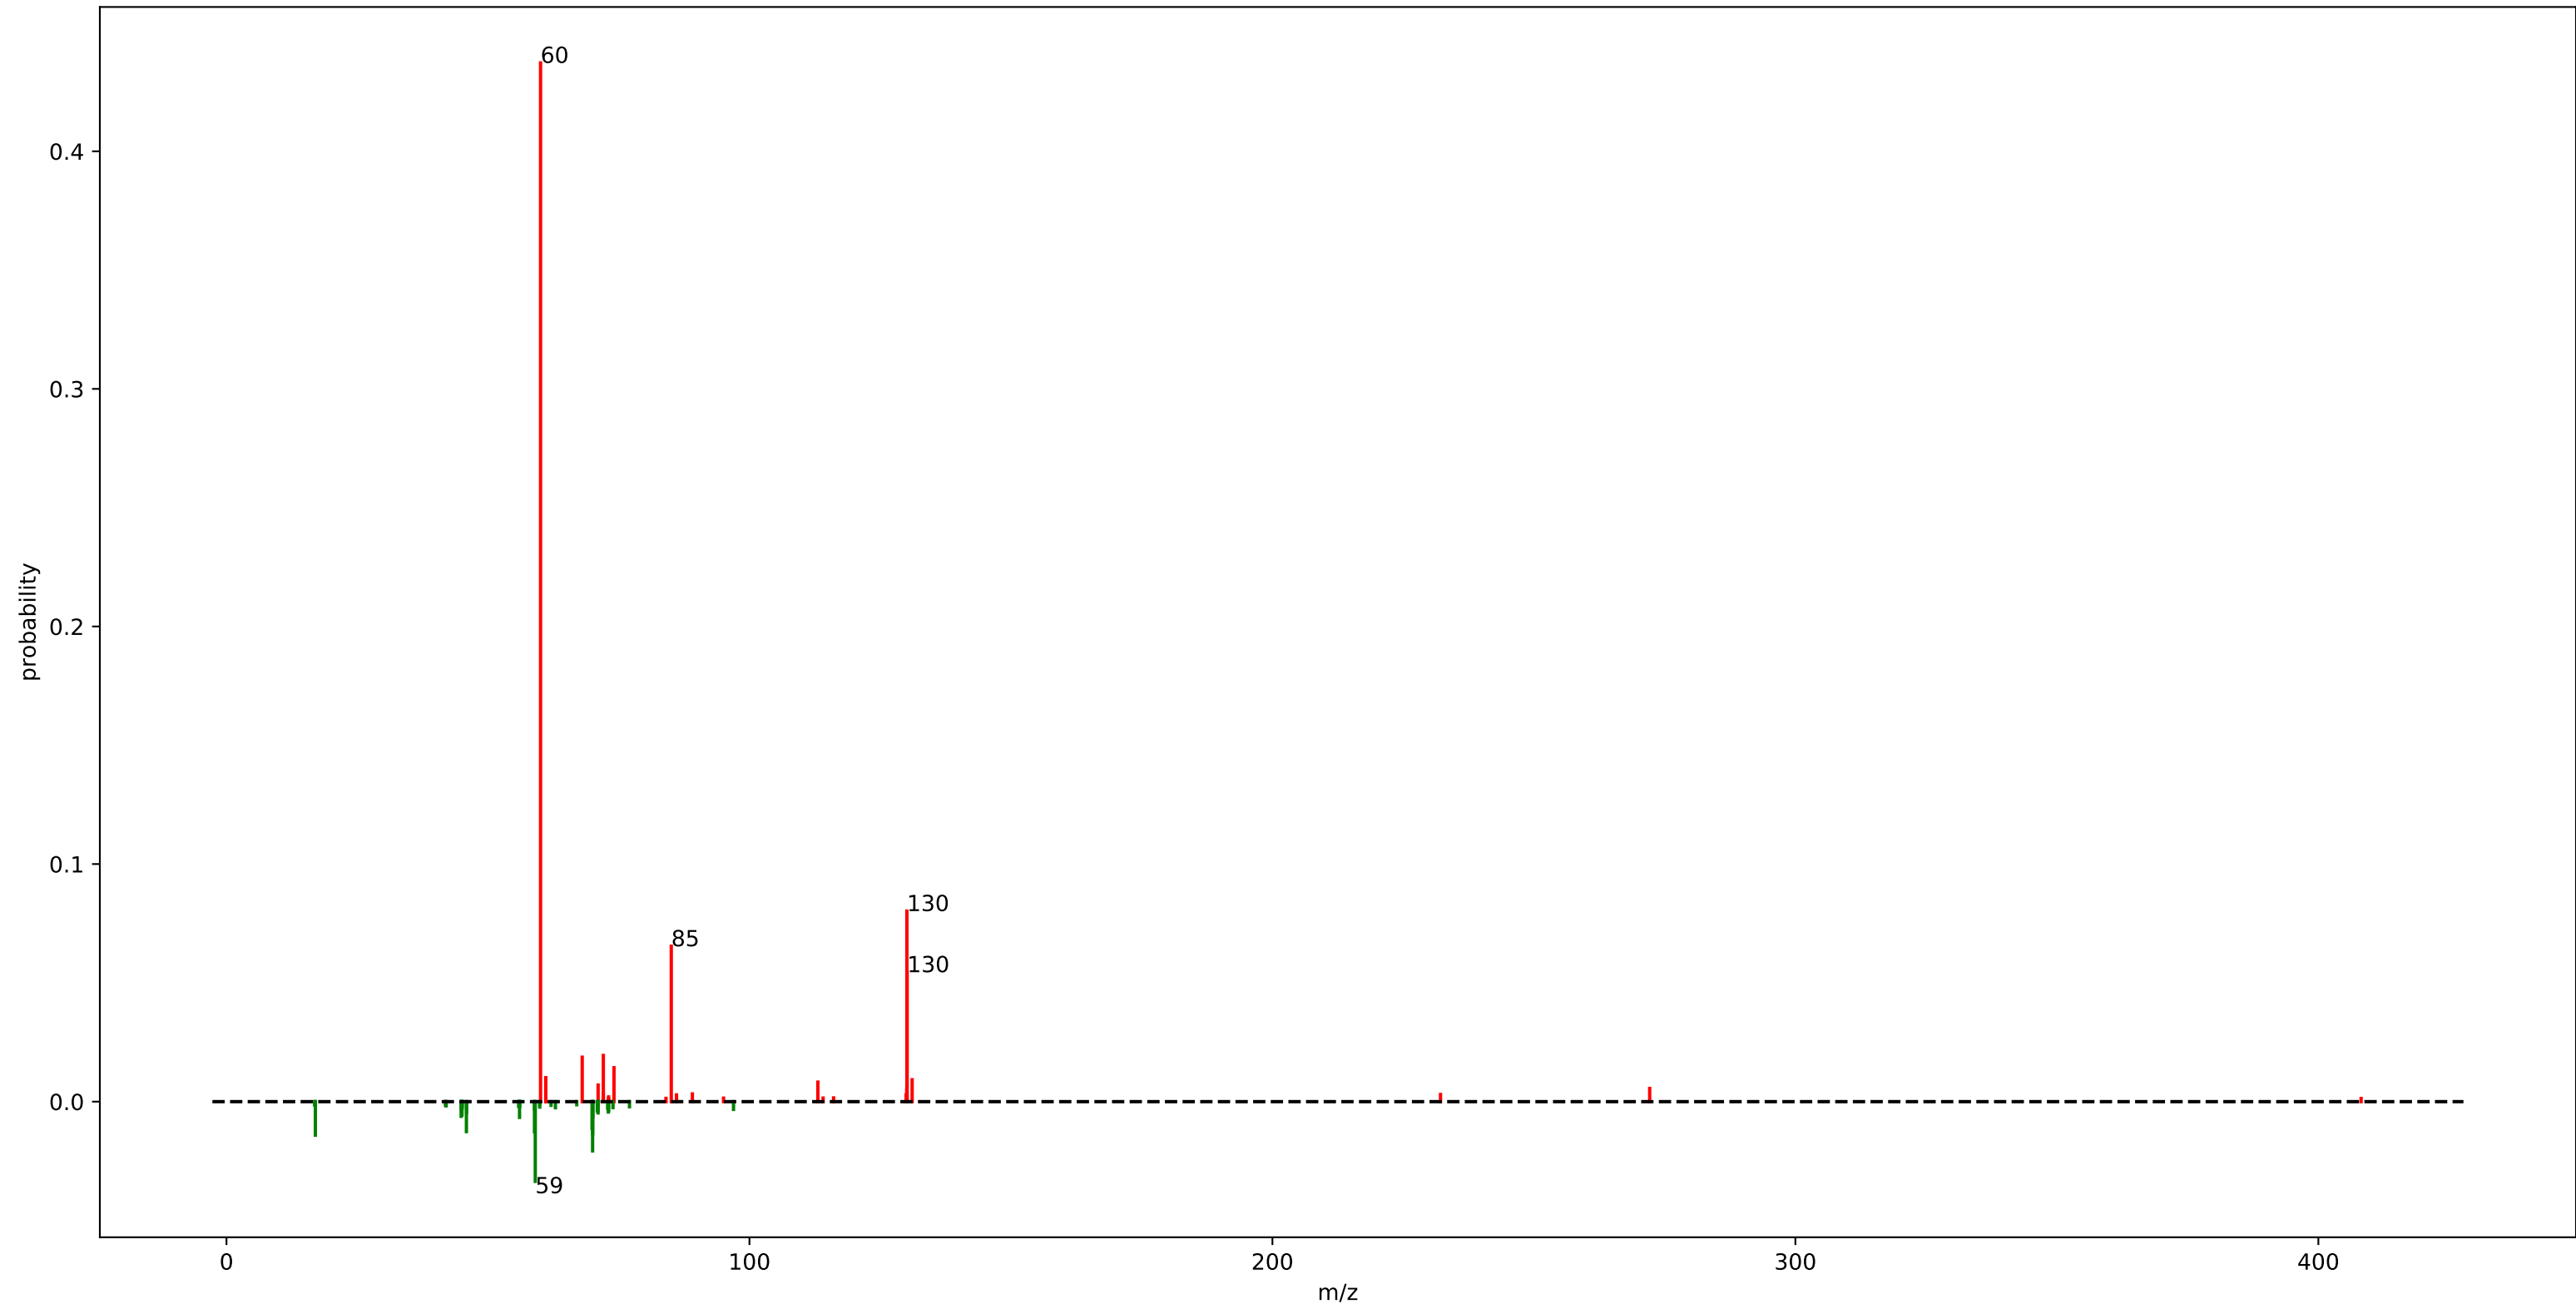

# urine\_mass2motif\_183.m2m

|                   |        |                   |        |
|-------------------|--------|-------------------|--------|
| fragment_60.0575  | : 0.44 | loss_70.0625      | : 0.01 |
| fragment_130.1075 | : 0.08 | loss_44.8725      | : 0.01 |
| fragment_85.0525  | : 0.07 | fragment_130.0975 | : 0.01 |
| fragment_130.1575 | : 0.05 | loss_45.0325      | : 0.01 |
| loss_59.0475      | : 0.03 | fragment_272.1375 | : 0.01 |
| loss_70.0075      | : 0.02 |                   |        |
| fragment_72.0625  | : 0.02 |                   |        |
| fragment_68.0225  | : 0.02 |                   |        |
| fragment_74.0975  | : 0.01 |                   |        |
| loss_16.9975      | : 0.01 |                   |        |
| loss_70.0325      | : 0.01 |                   |        |
| loss_58.8975      | : 0.01 |                   |        |
| loss_45.8775      | : 0.01 |                   |        |
| loss_69.9025      | : 0.01 |                   |        |
| fragment_61.0575  | : 0.01 |                   |        |
| fragment_61.0525  | : 0.01 |                   |        |
| fragment_131.1125 | : 0.01 |                   |        |
| fragment_113.0825 | : 0.01 |                   |        |
| fragment_71.0625  | : 0.01 |                   |        |
| loss_56.0375      | : 0.01 |                   |        |

urine\_mass2motif\_37.m2m

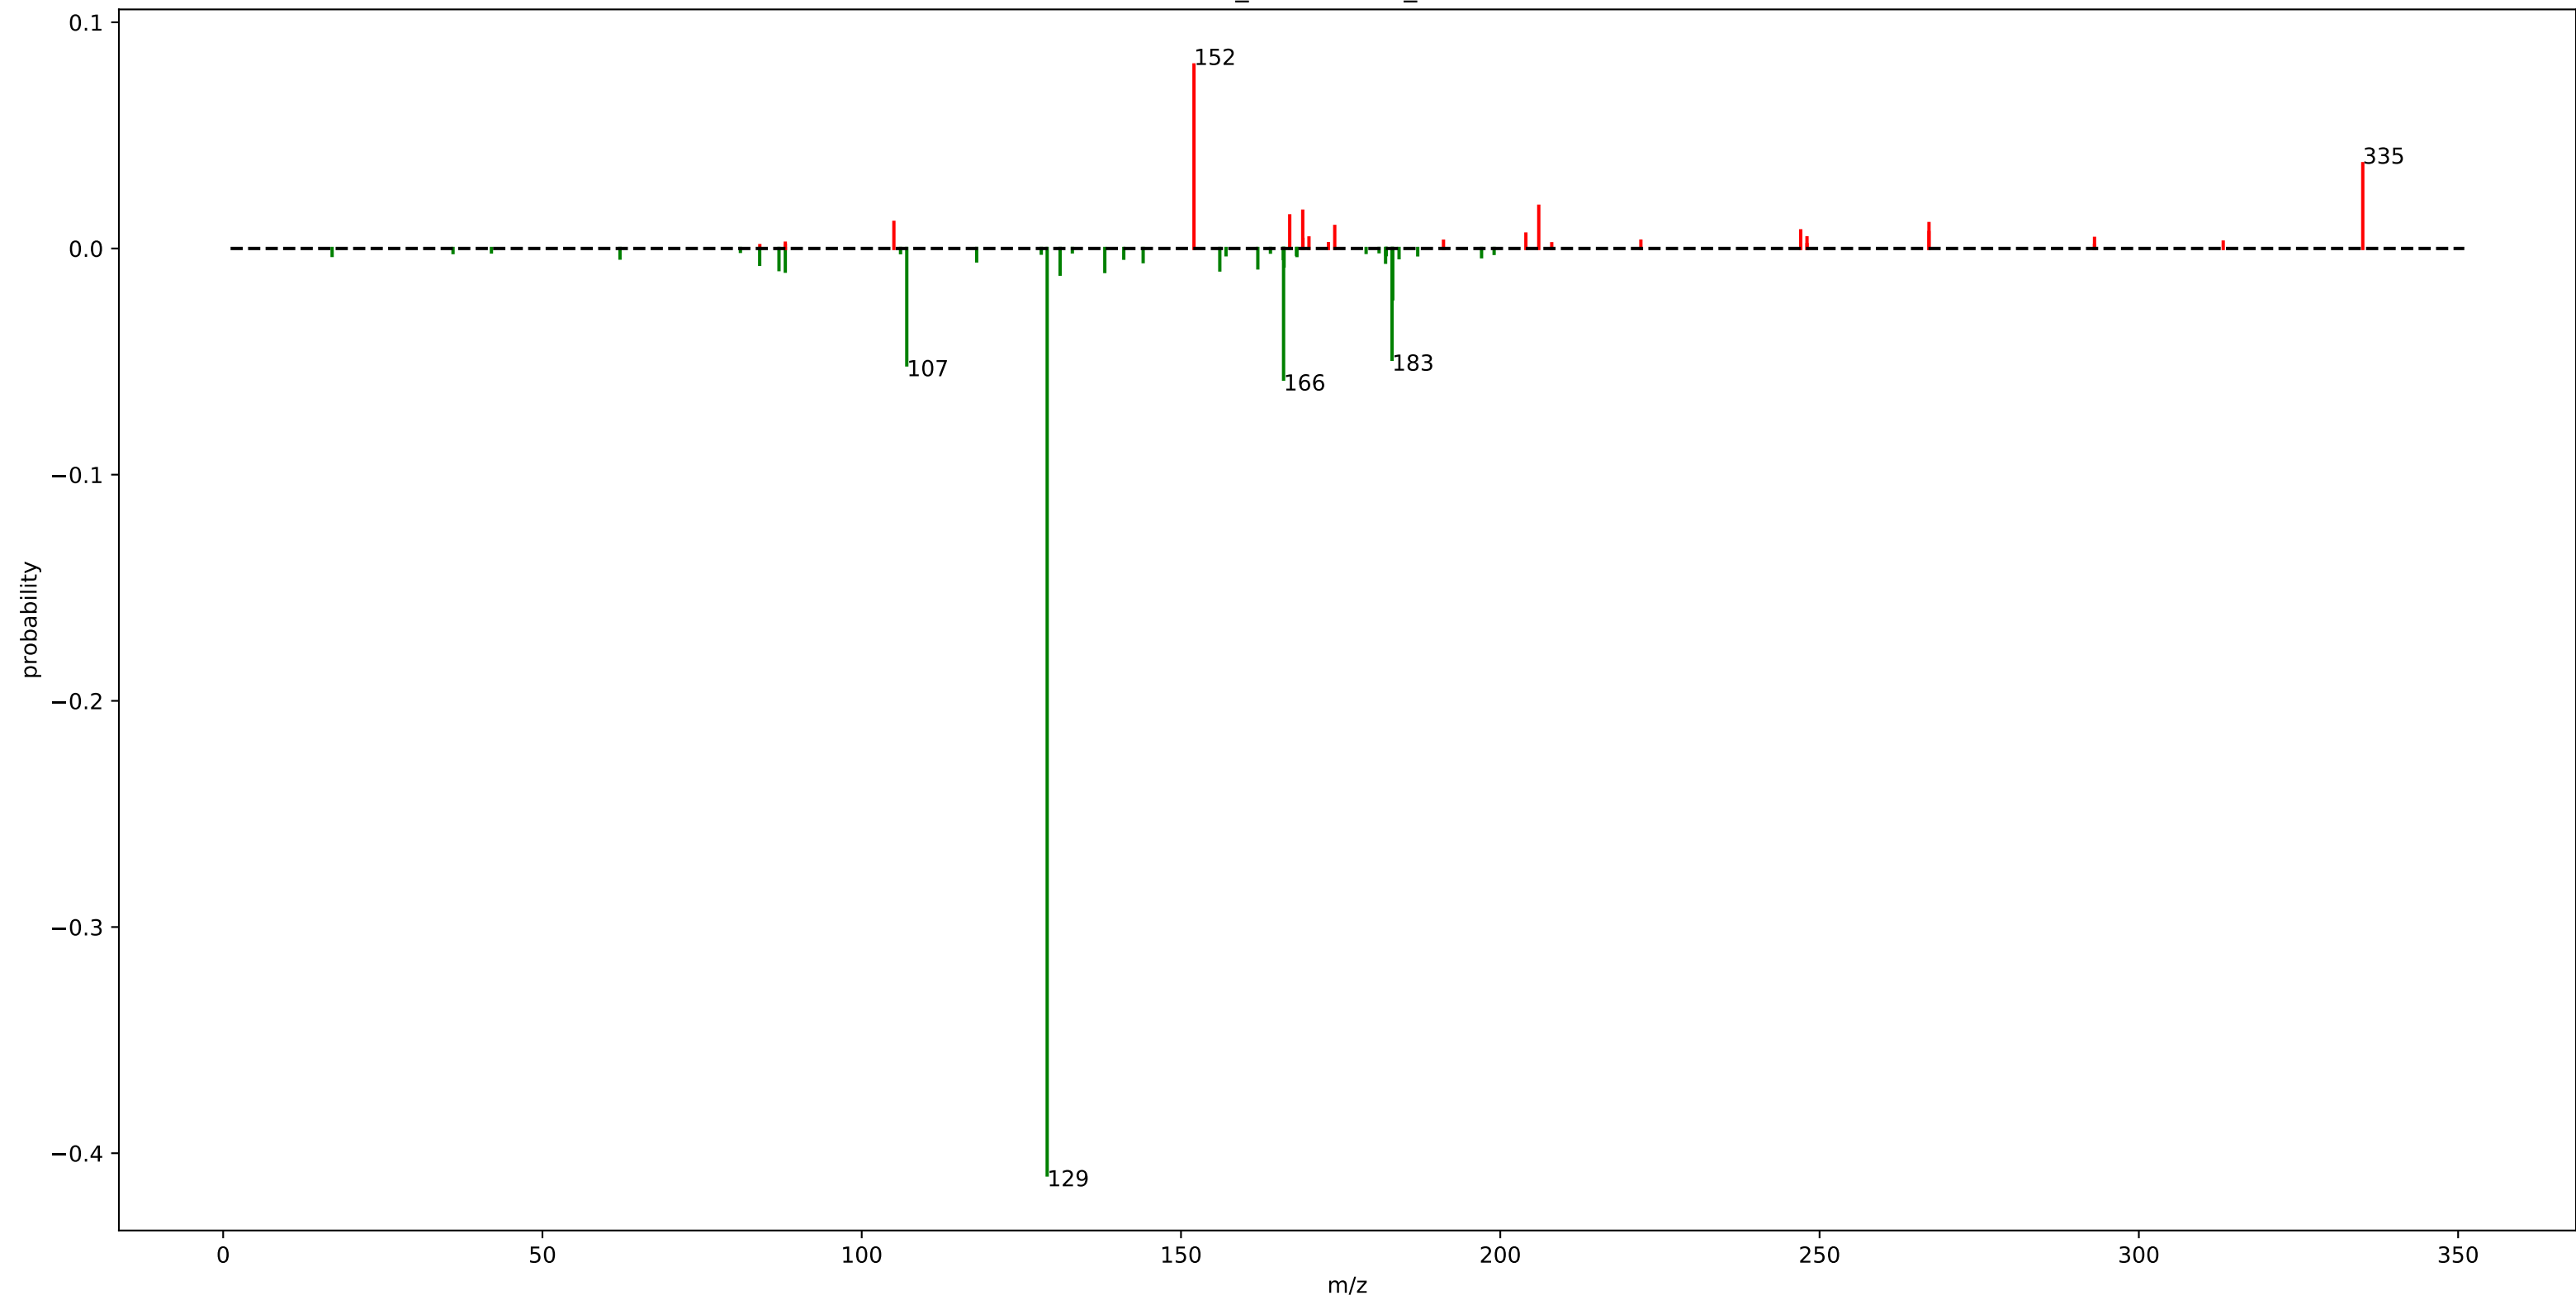

## urine\_mass2motif\_37.m2m

|                   |        |                   |        |
|-------------------|--------|-------------------|--------|
| loss_129.0425     | : 0.41 | loss_166.1375     | : 0.01 |
| fragment_152.0325 | : 0.08 | fragment_267.1325 | : 0.01 |
| loss_166.0625     | : 0.06 | loss_84.0225      | : 0.01 |
| loss_107.0575     | : 0.05 | fragment_204.0075 | : 0.01 |
| loss_183.0475     | : 0.05 | loss_182.0375     | : 0.01 |
| fragment_335.0675 | : 0.04 | loss_144.0725     | : 0.01 |
| loss_183.1625     | : 0.02 | loss_118.0025     | : 0.01 |
| fragment_206.0275 | : 0.02 |                   |        |
| fragment_169.0625 | : 0.02 |                   |        |
| fragment_167.0275 | : 0.01 |                   |        |
| fragment_105.0375 | : 0.01 |                   |        |
| loss_131.0675     | : 0.01 |                   |        |
| fragment_267.1375 | : 0.01 |                   |        |
| loss_138.0675     | : 0.01 |                   |        |
| loss_88.0325      | : 0.01 |                   |        |
| fragment_174.0775 | : 0.01 |                   |        |
| loss_156.0775     | : 0.01 |                   |        |
| loss_87.0425      | : 0.01 |                   |        |
| loss_162.0325     | : 0.01 |                   |        |
| fragment_247.0525 | : 0.01 |                   |        |

rhabdus\_motif\_42.m2m

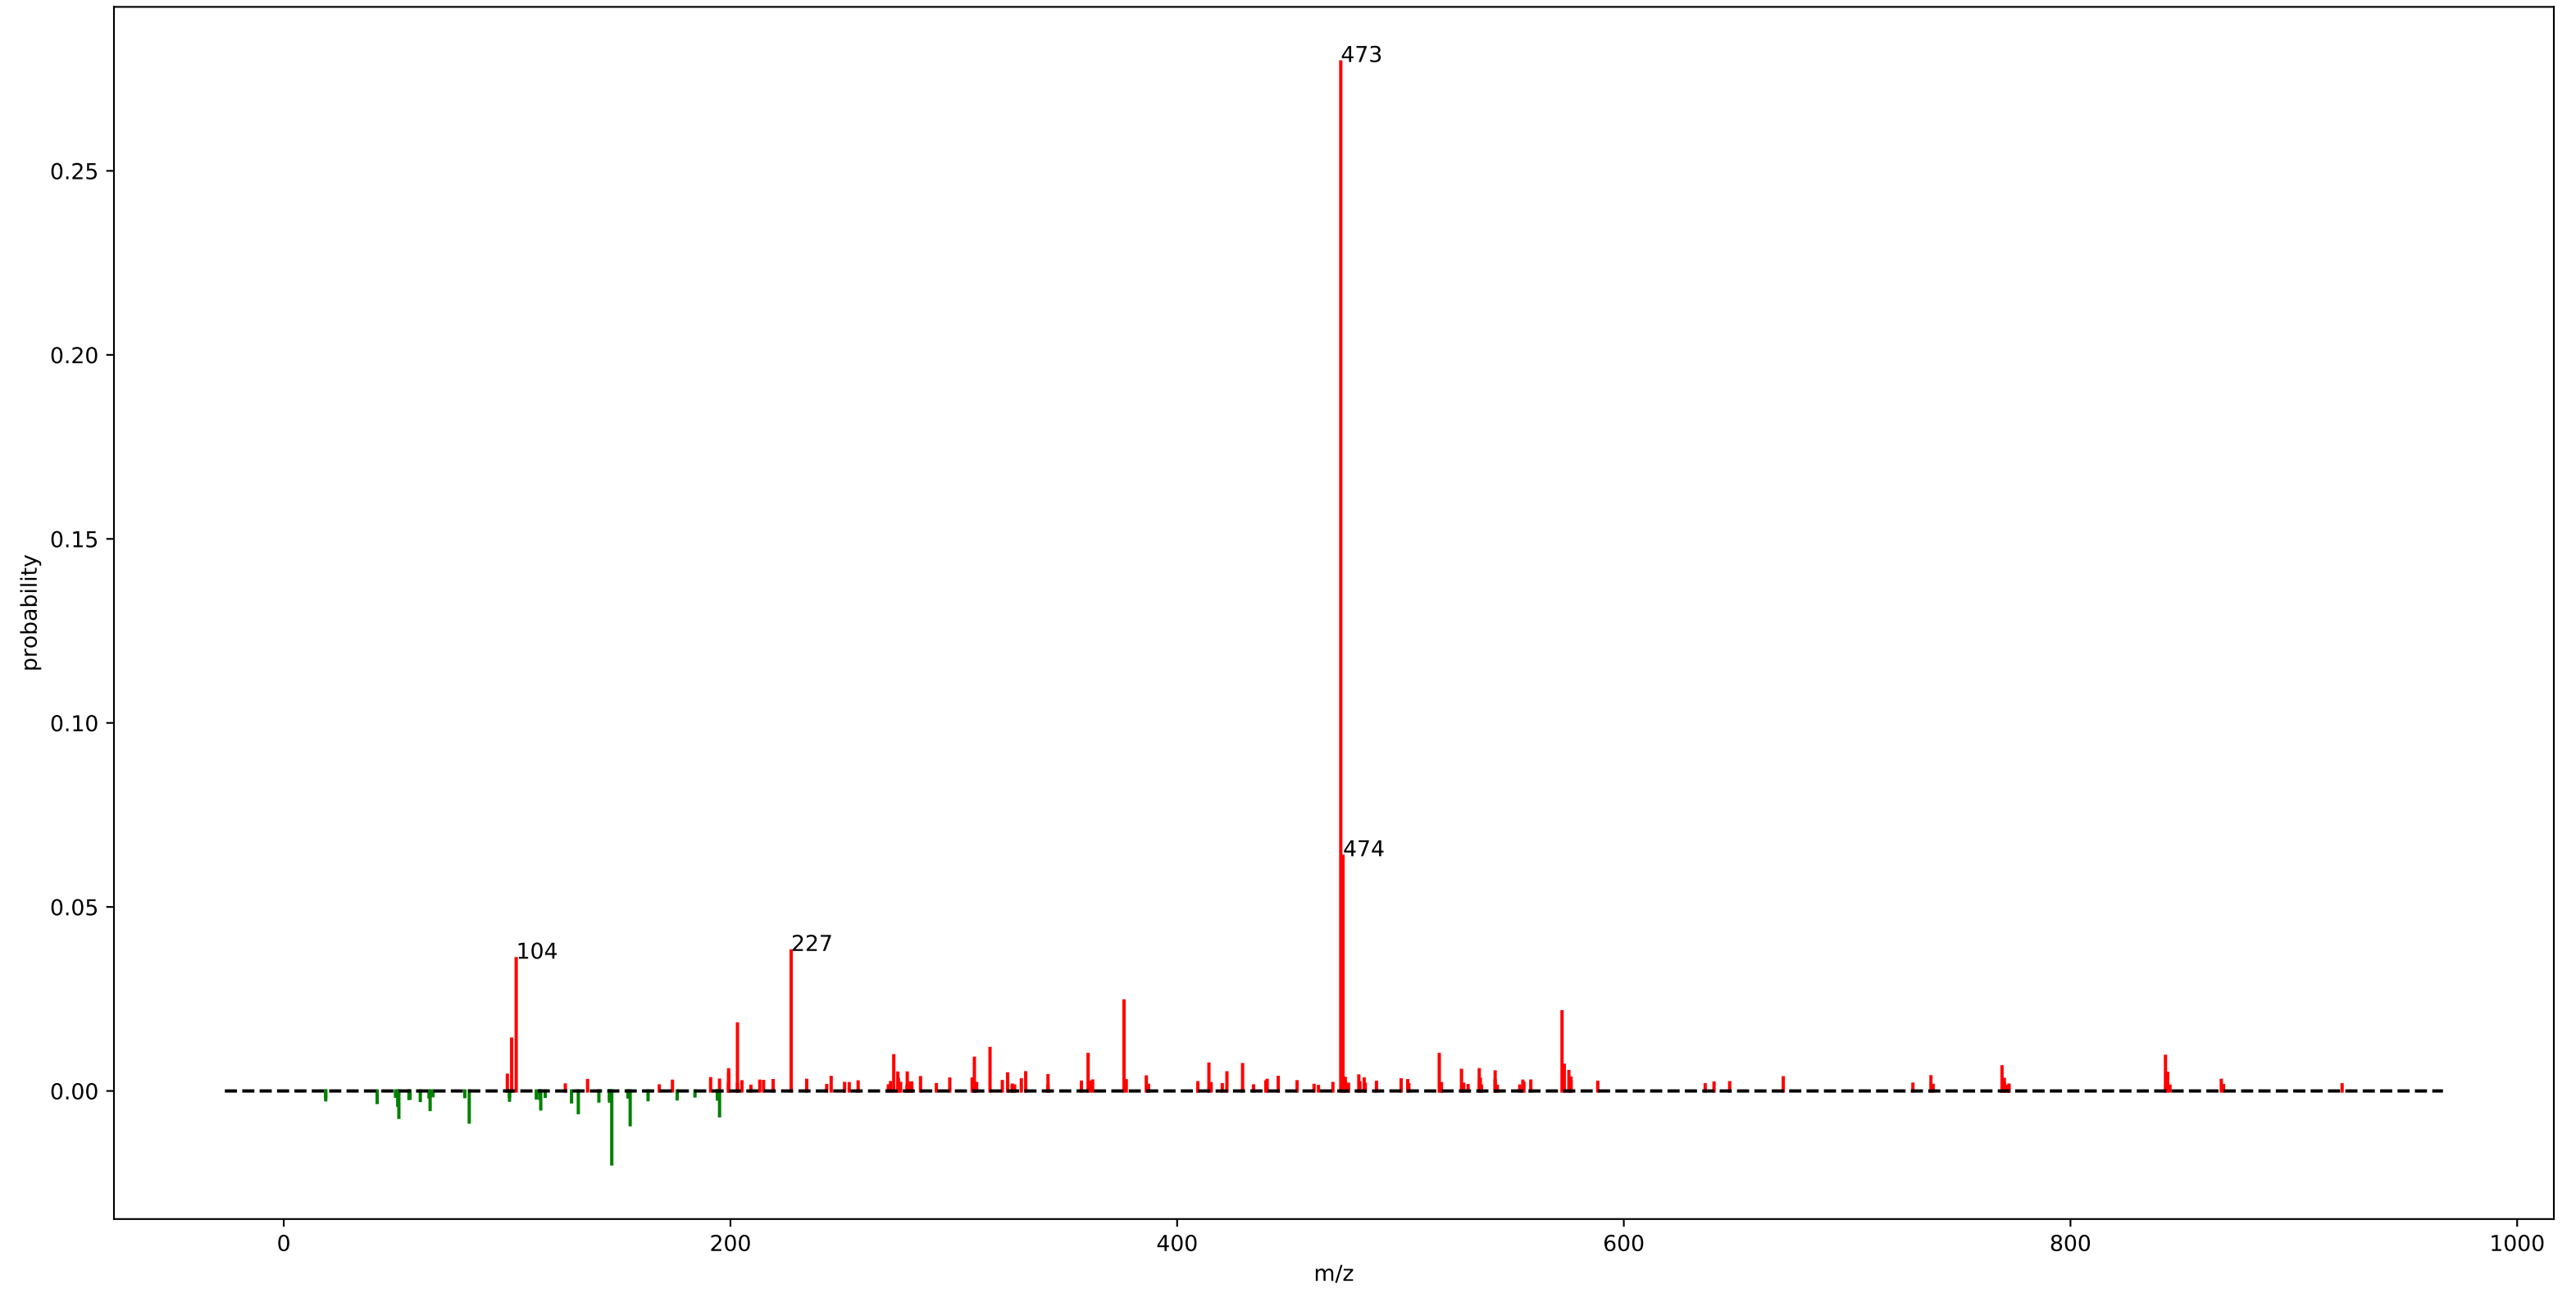

## rhabdus\_motif\_42.m2m

|                   |        |                   |        |
|-------------------|--------|-------------------|--------|
| fragment_473.2725 | : 0.28 | fragment_573.3475 | : 0.01 |
| fragment_474.2775 | : 0.06 | loss_195.1225     | : 0.01 |
| fragment_227.1775 | : 0.04 | fragment_769.3575 | : 0.01 |
| fragment_104.0675 | : 0.04 | loss_131.8775     | : 0.01 |
| fragment_376.2225 | : 0.02 | fragment_535.2825 | : 0.01 |
| fragment_572.3425 | : 0.02 | fragment_199.1775 | : 0.01 |
| loss_146.8575     | : 0.02 | fragment_527.3225 | : 0.01 |
| fragment_203.1375 | : 0.02 | fragment_575.4125 | : 0.01 |
| fragment_102.0375 | : 0.01 | fragment_542.3925 | : 0.01 |
| fragment_316.2225 | : 0.01 | loss_65.5275      | : 0.01 |
| fragment_360.1475 | : 0.01 |                   |        |
| fragment_517.3725 | : 0.01 |                   |        |
| fragment_273.1275 | : 0.01 |                   |        |
| fragment_842.5375 | : 0.01 |                   |        |
| loss_155.1025     | : 0.01 |                   |        |
| fragment_309.2175 | : 0.01 |                   |        |
| loss_83.0375      | : 0.01 |                   |        |
| fragment_414.2375 | : 0.01 |                   |        |
| loss_51.5275      | : 0.01 |                   |        |
| fragment_429.3075 | : 0.01 |                   |        |

motif\_531

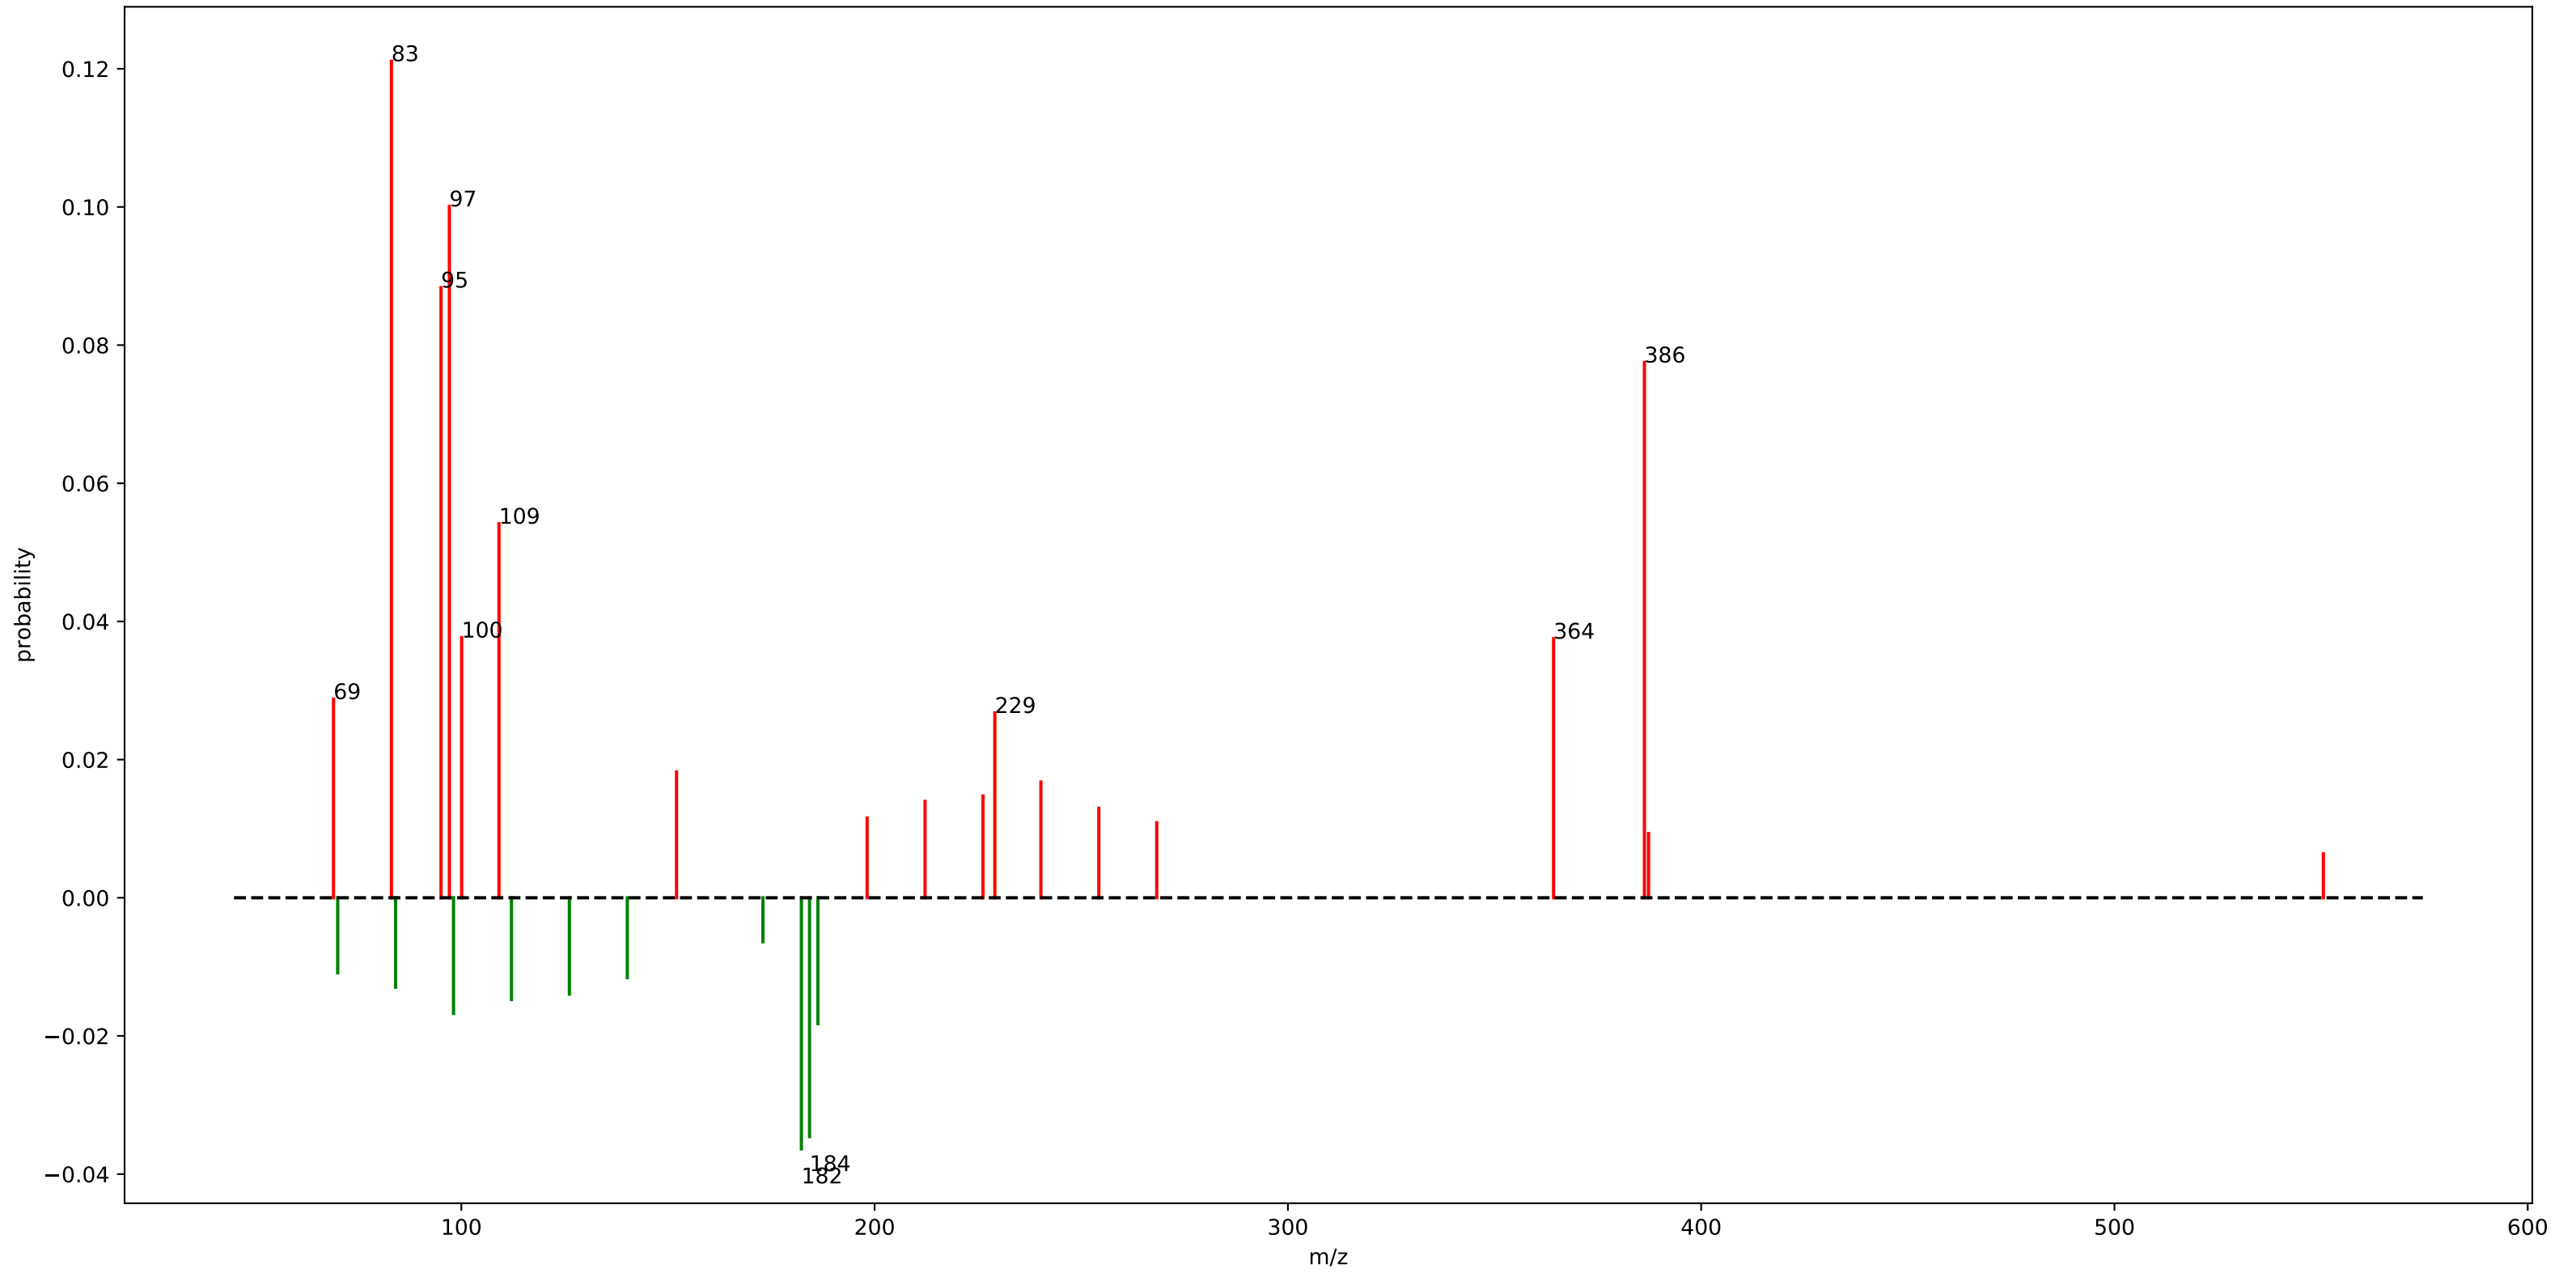

## motif\_531

|                   |        |                   |        |
|-------------------|--------|-------------------|--------|
| fragment_83.0825  | : 0.12 | loss_84.0925      | : 0.01 |
| fragment_97.1025  | : 0.10 | loss_140.1575     | : 0.01 |
| fragment_95.0825  | : 0.09 | fragment_198.1825 | : 0.01 |
| fragment_386.2675 | : 0.08 | fragment_268.2625 | : 0.01 |
| fragment_109.0975 | : 0.05 | loss_70.0775      | : 0.01 |
| fragment_100.0725 | : 0.04 | fragment_387.2675 | : 0.01 |
| fragment_364.2875 | : 0.04 | loss_172.9725     | : 0.01 |
| loss_182.2775     | : 0.04 | fragment_550.5525 | : 0.01 |
| loss_184.2525     | : 0.03 |                   |        |
| fragment_69.0675  | : 0.03 |                   |        |
| fragment_229.0825 | : 0.03 |                   |        |
| loss_186.2725     | : 0.02 |                   |        |
| fragment_152.0675 | : 0.02 |                   |        |
| fragment_240.2325 | : 0.02 |                   |        |
| loss_98.1075      | : 0.02 |                   |        |
| loss_112.1225     | : 0.01 |                   |        |
| fragment_226.2175 | : 0.01 |                   |        |
| loss_126.1425     | : 0.01 |                   |        |
| fragment_212.1975 | : 0.01 |                   |        |
| fragment_254.2475 | : 0.01 |                   |        |



mb\_motif\_14.m2m

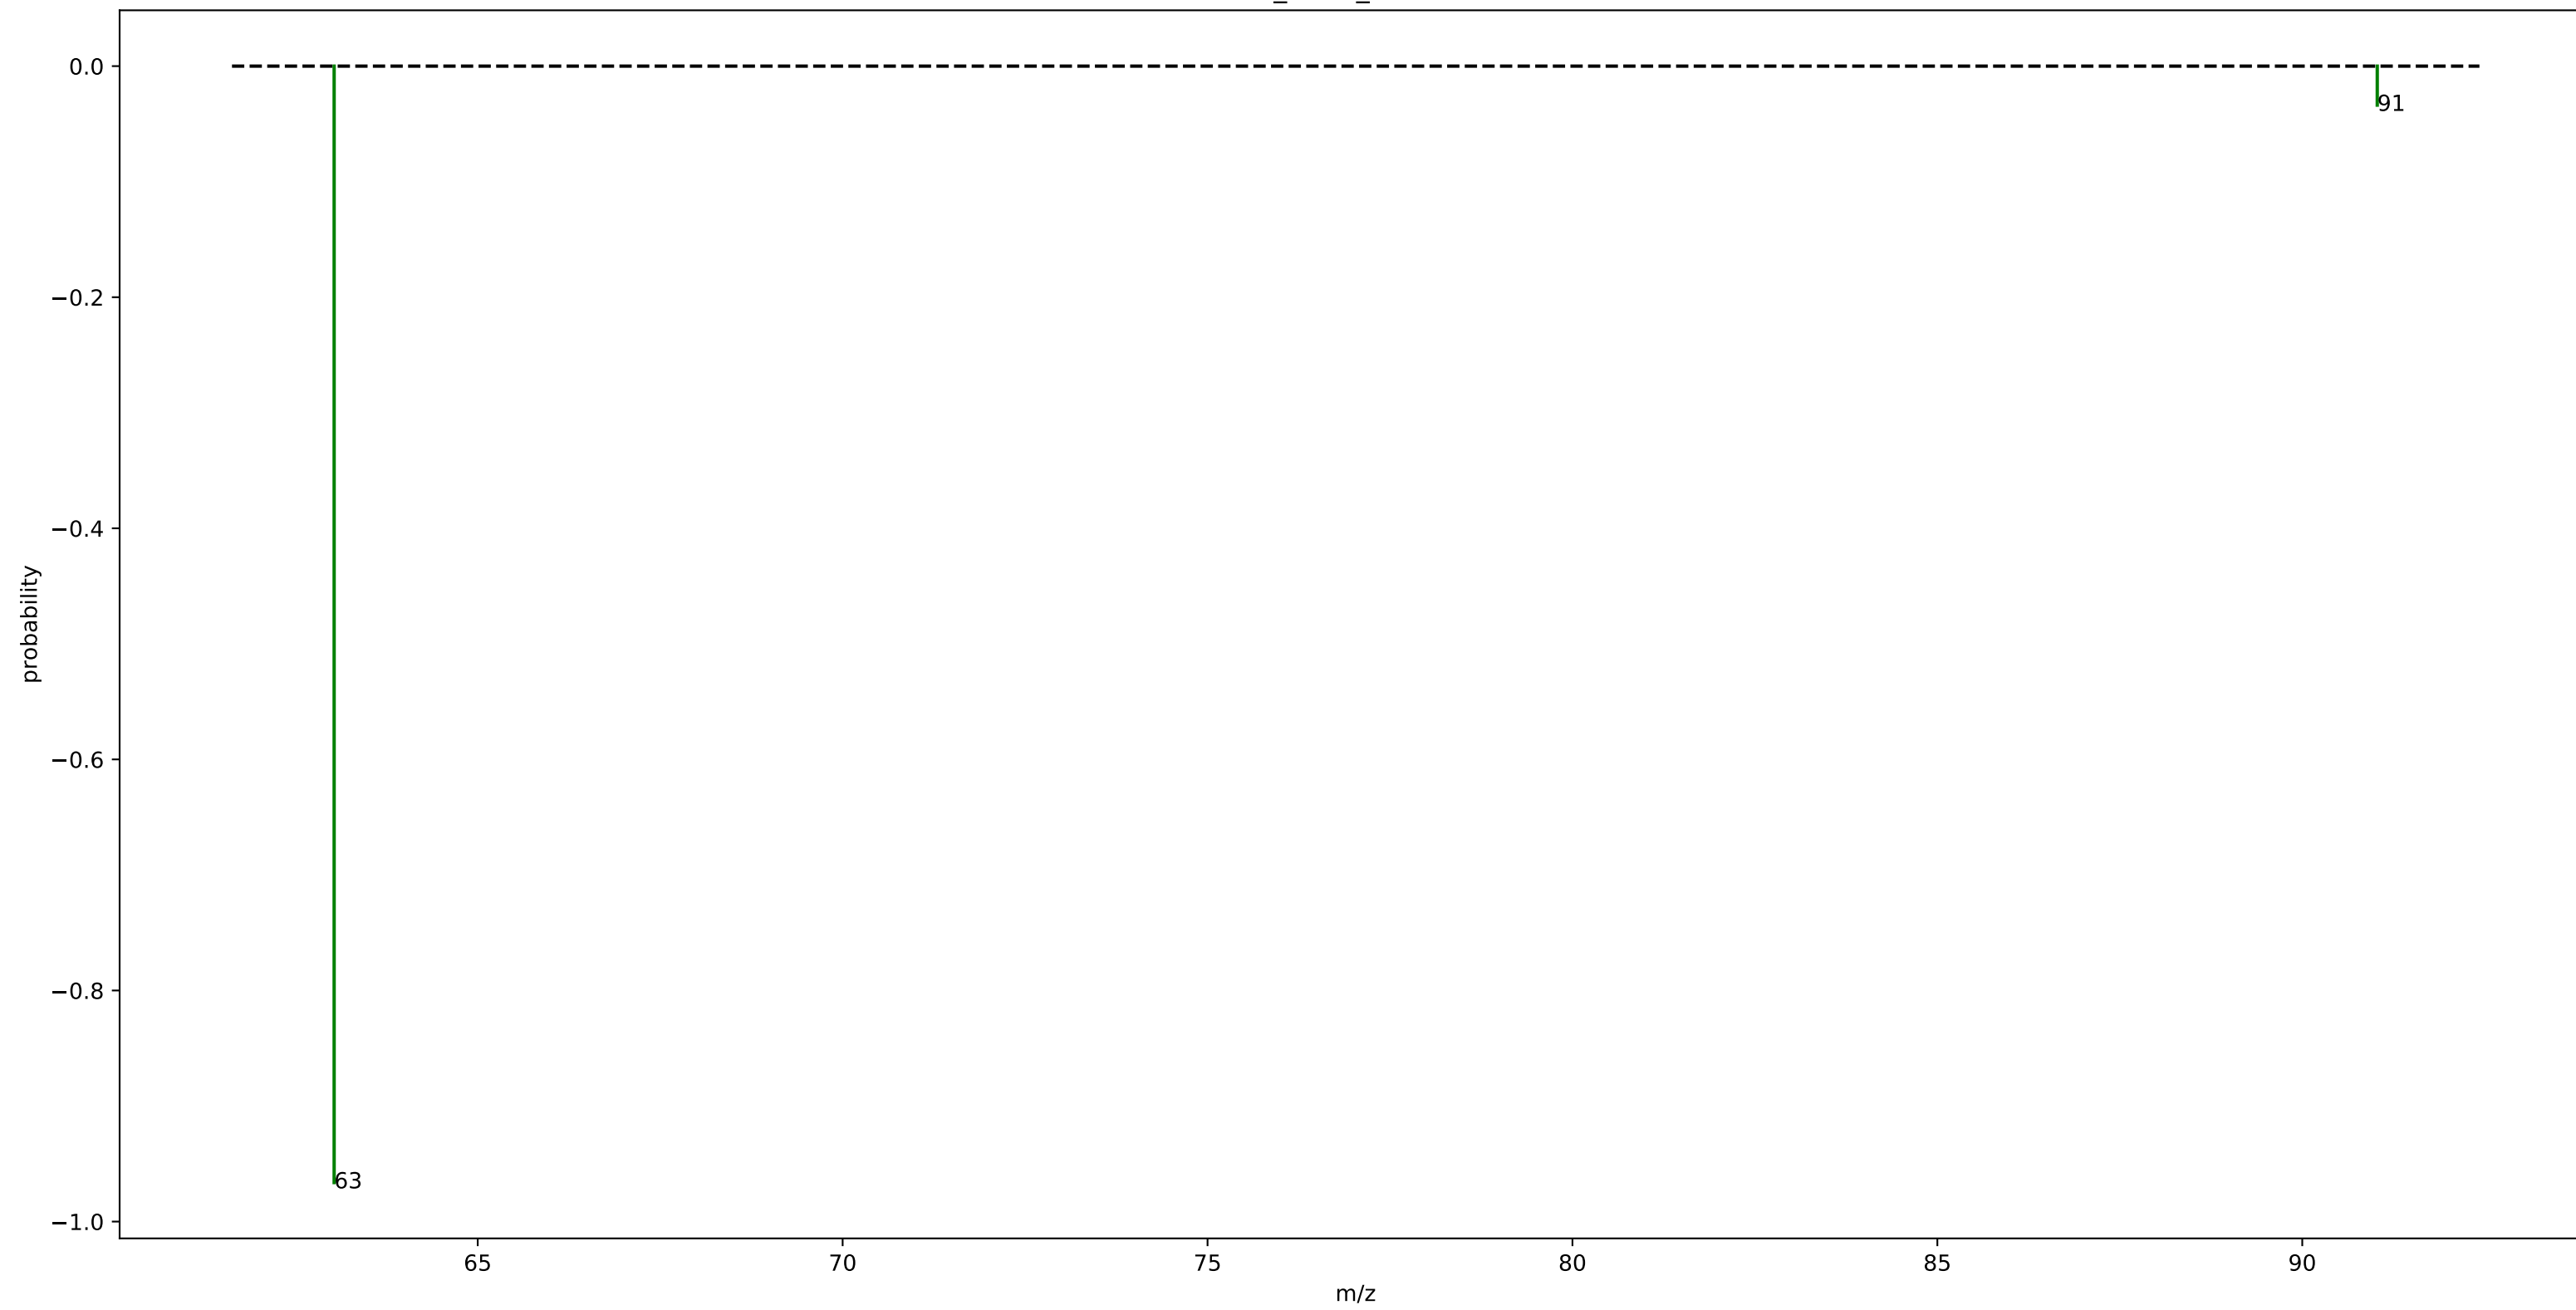

## mb\_motif\_14.m2m

loss\_63.0325 : 0.97  
loss\_91.0275 : 0.03

gnps\_motif\_65.m2m

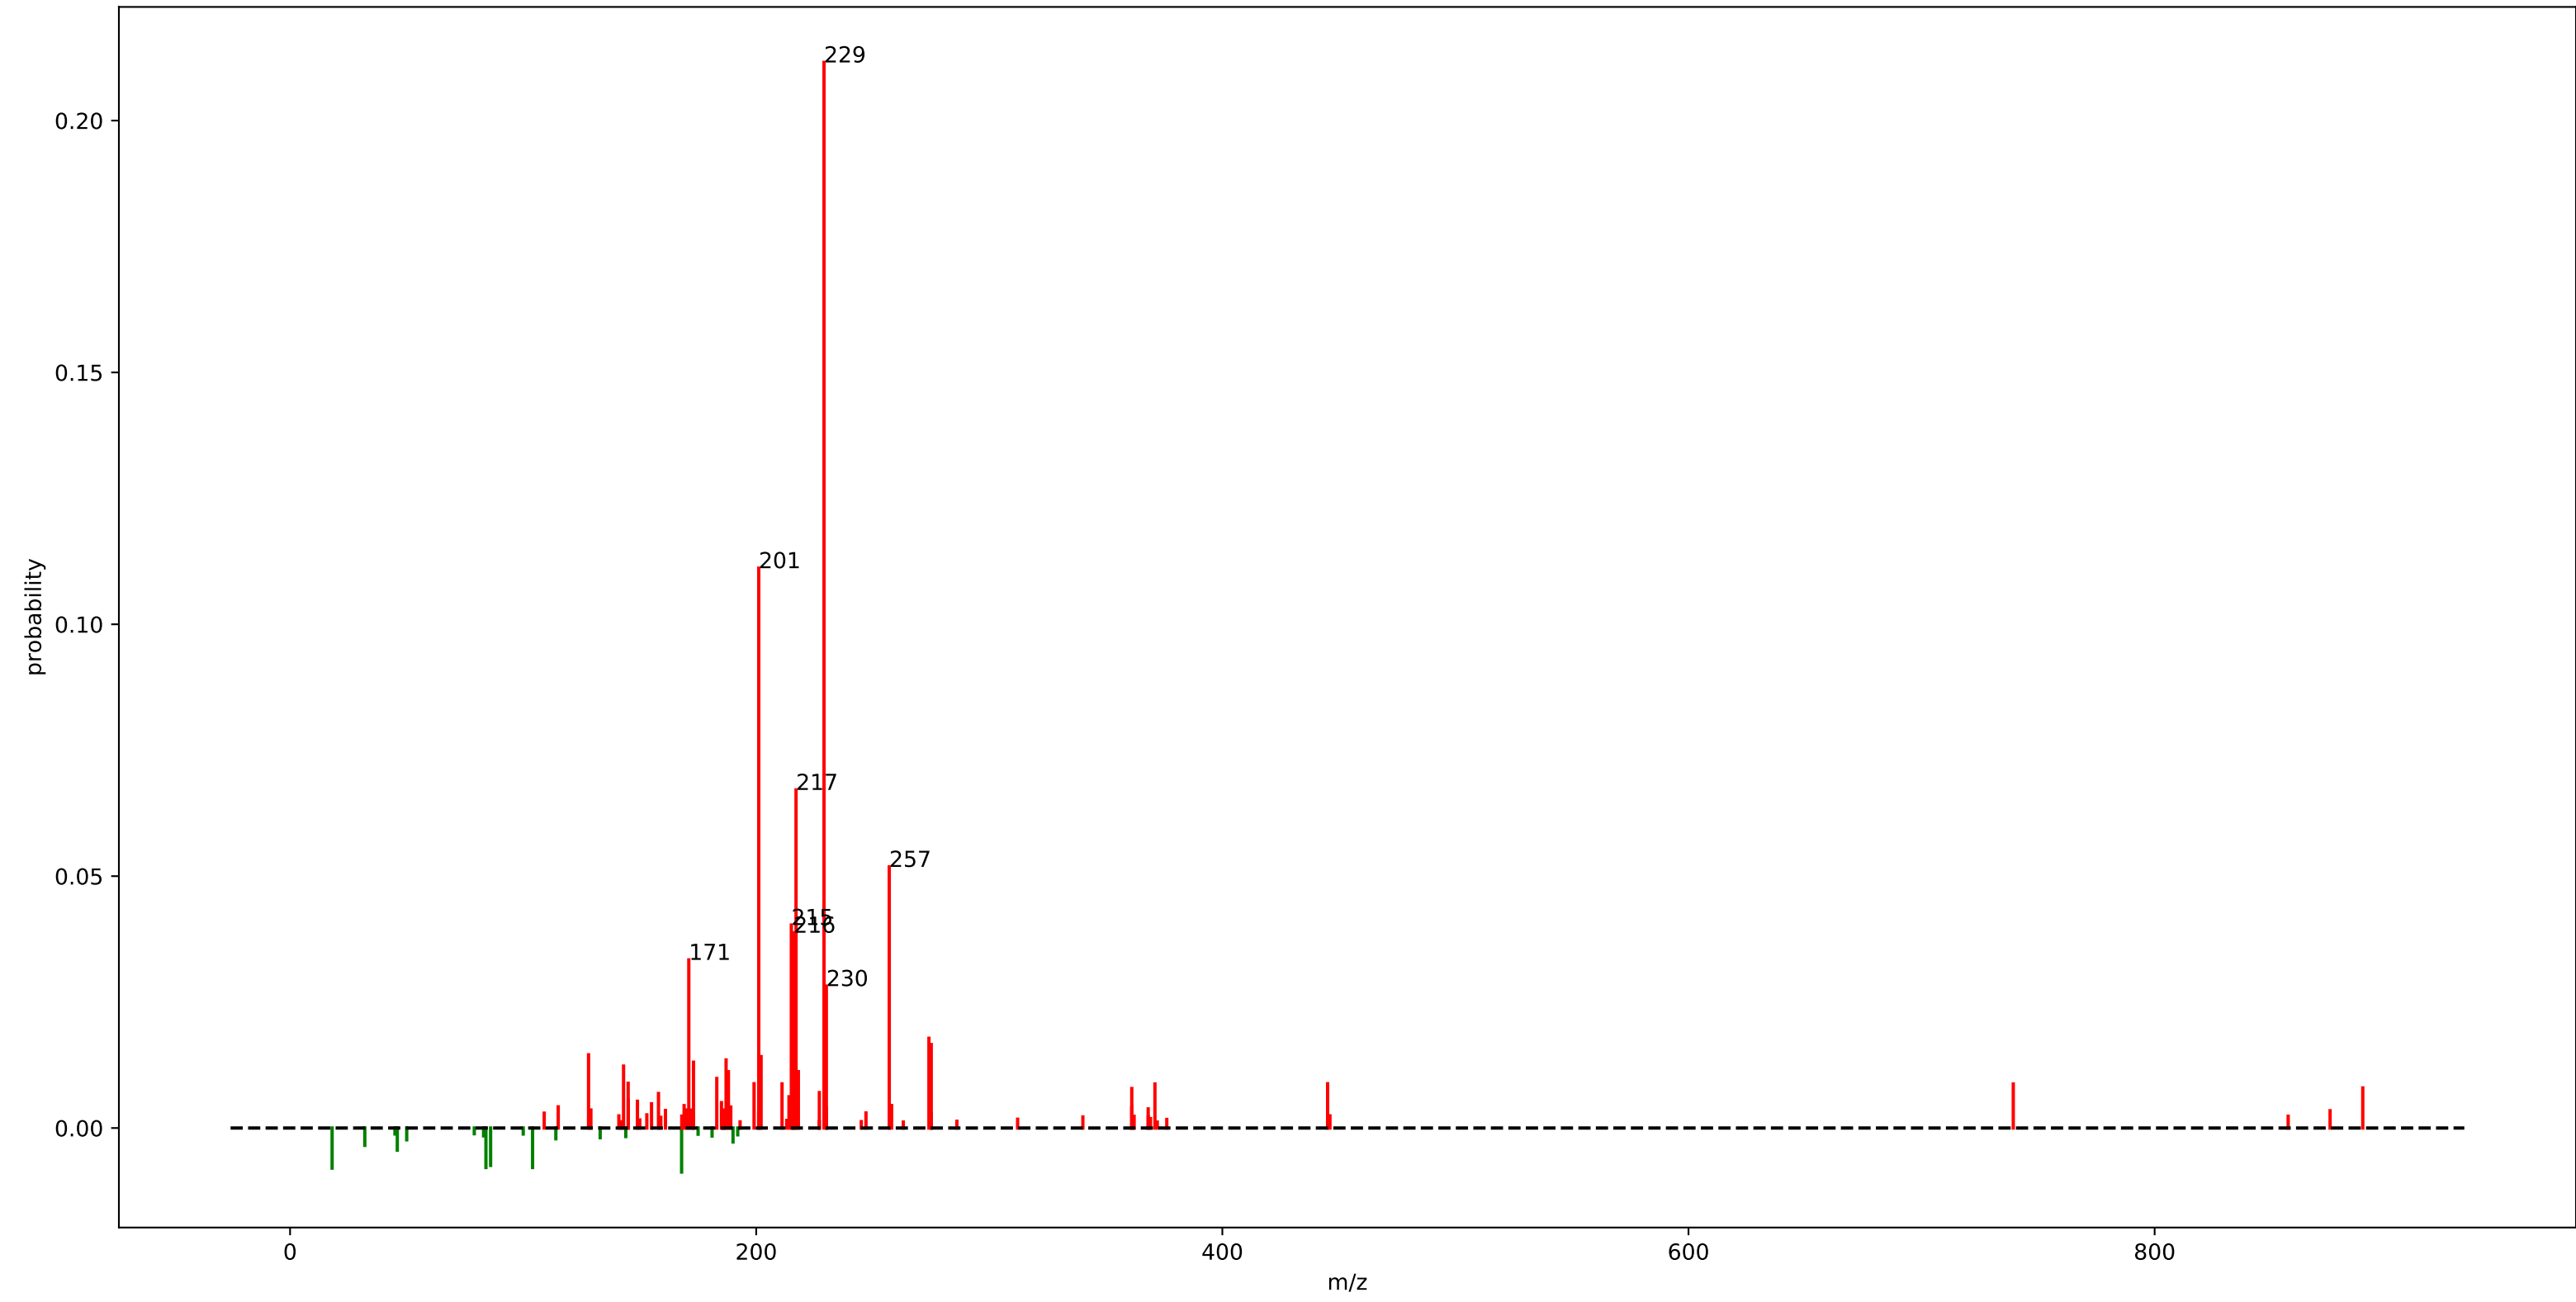

## gnps\_motif\_65.m2m

|                   |        |                   |        |
|-------------------|--------|-------------------|--------|
| fragment_229.0875 | : 0.21 | fragment_445.1625 | : 0.01 |
| fragment_201.0925 | : 0.11 | fragment_211.0775 | : 0.01 |
| fragment_217.0875 | : 0.07 | loss_167.9875     | : 0.01 |
| fragment_257.0825 | : 0.05 | fragment_739.3475 | : 0.01 |
| fragment_215.0725 | : 0.04 | fragment_371.0725 | : 0.01 |
| fragment_216.0775 | : 0.04 | fragment_889.3025 | : 0.01 |
| fragment_171.0825 | : 0.03 | loss_18.0375      | : 0.01 |
| fragment_230.0875 | : 0.03 | loss_104.0475     | : 0.01 |
| fragment_274.1075 | : 0.02 | loss_84.0325      | : 0.01 |
| fragment_275.0925 | : 0.02 | fragment_361.1325 | : 0.01 |
| fragment_128.0625 | : 0.01 | loss_86.0375      | : 0.01 |
| fragment_202.0925 | : 0.01 | fragment_227.0825 | : 0.01 |
| fragment_187.0775 | : 0.01 | fragment_158.0725 | : 0.01 |
| fragment_173.0975 | : 0.01 | fragment_214.0625 | : 0.01 |
| fragment_143.0875 | : 0.01 | fragment_145.1025 | : 0.01 |
| fragment_218.0875 | : 0.01 | fragment_149.0425 | : 0.01 |
| fragment_188.0825 | : 0.01 | fragment_185.0975 | : 0.01 |
| fragment_183.0825 | : 0.01 |                   |        |
| fragment_145.0625 | : 0.01 |                   |        |
| fragment_199.0775 | : 0.01 |                   |        |

euphorbia\_motif\_132.m2m

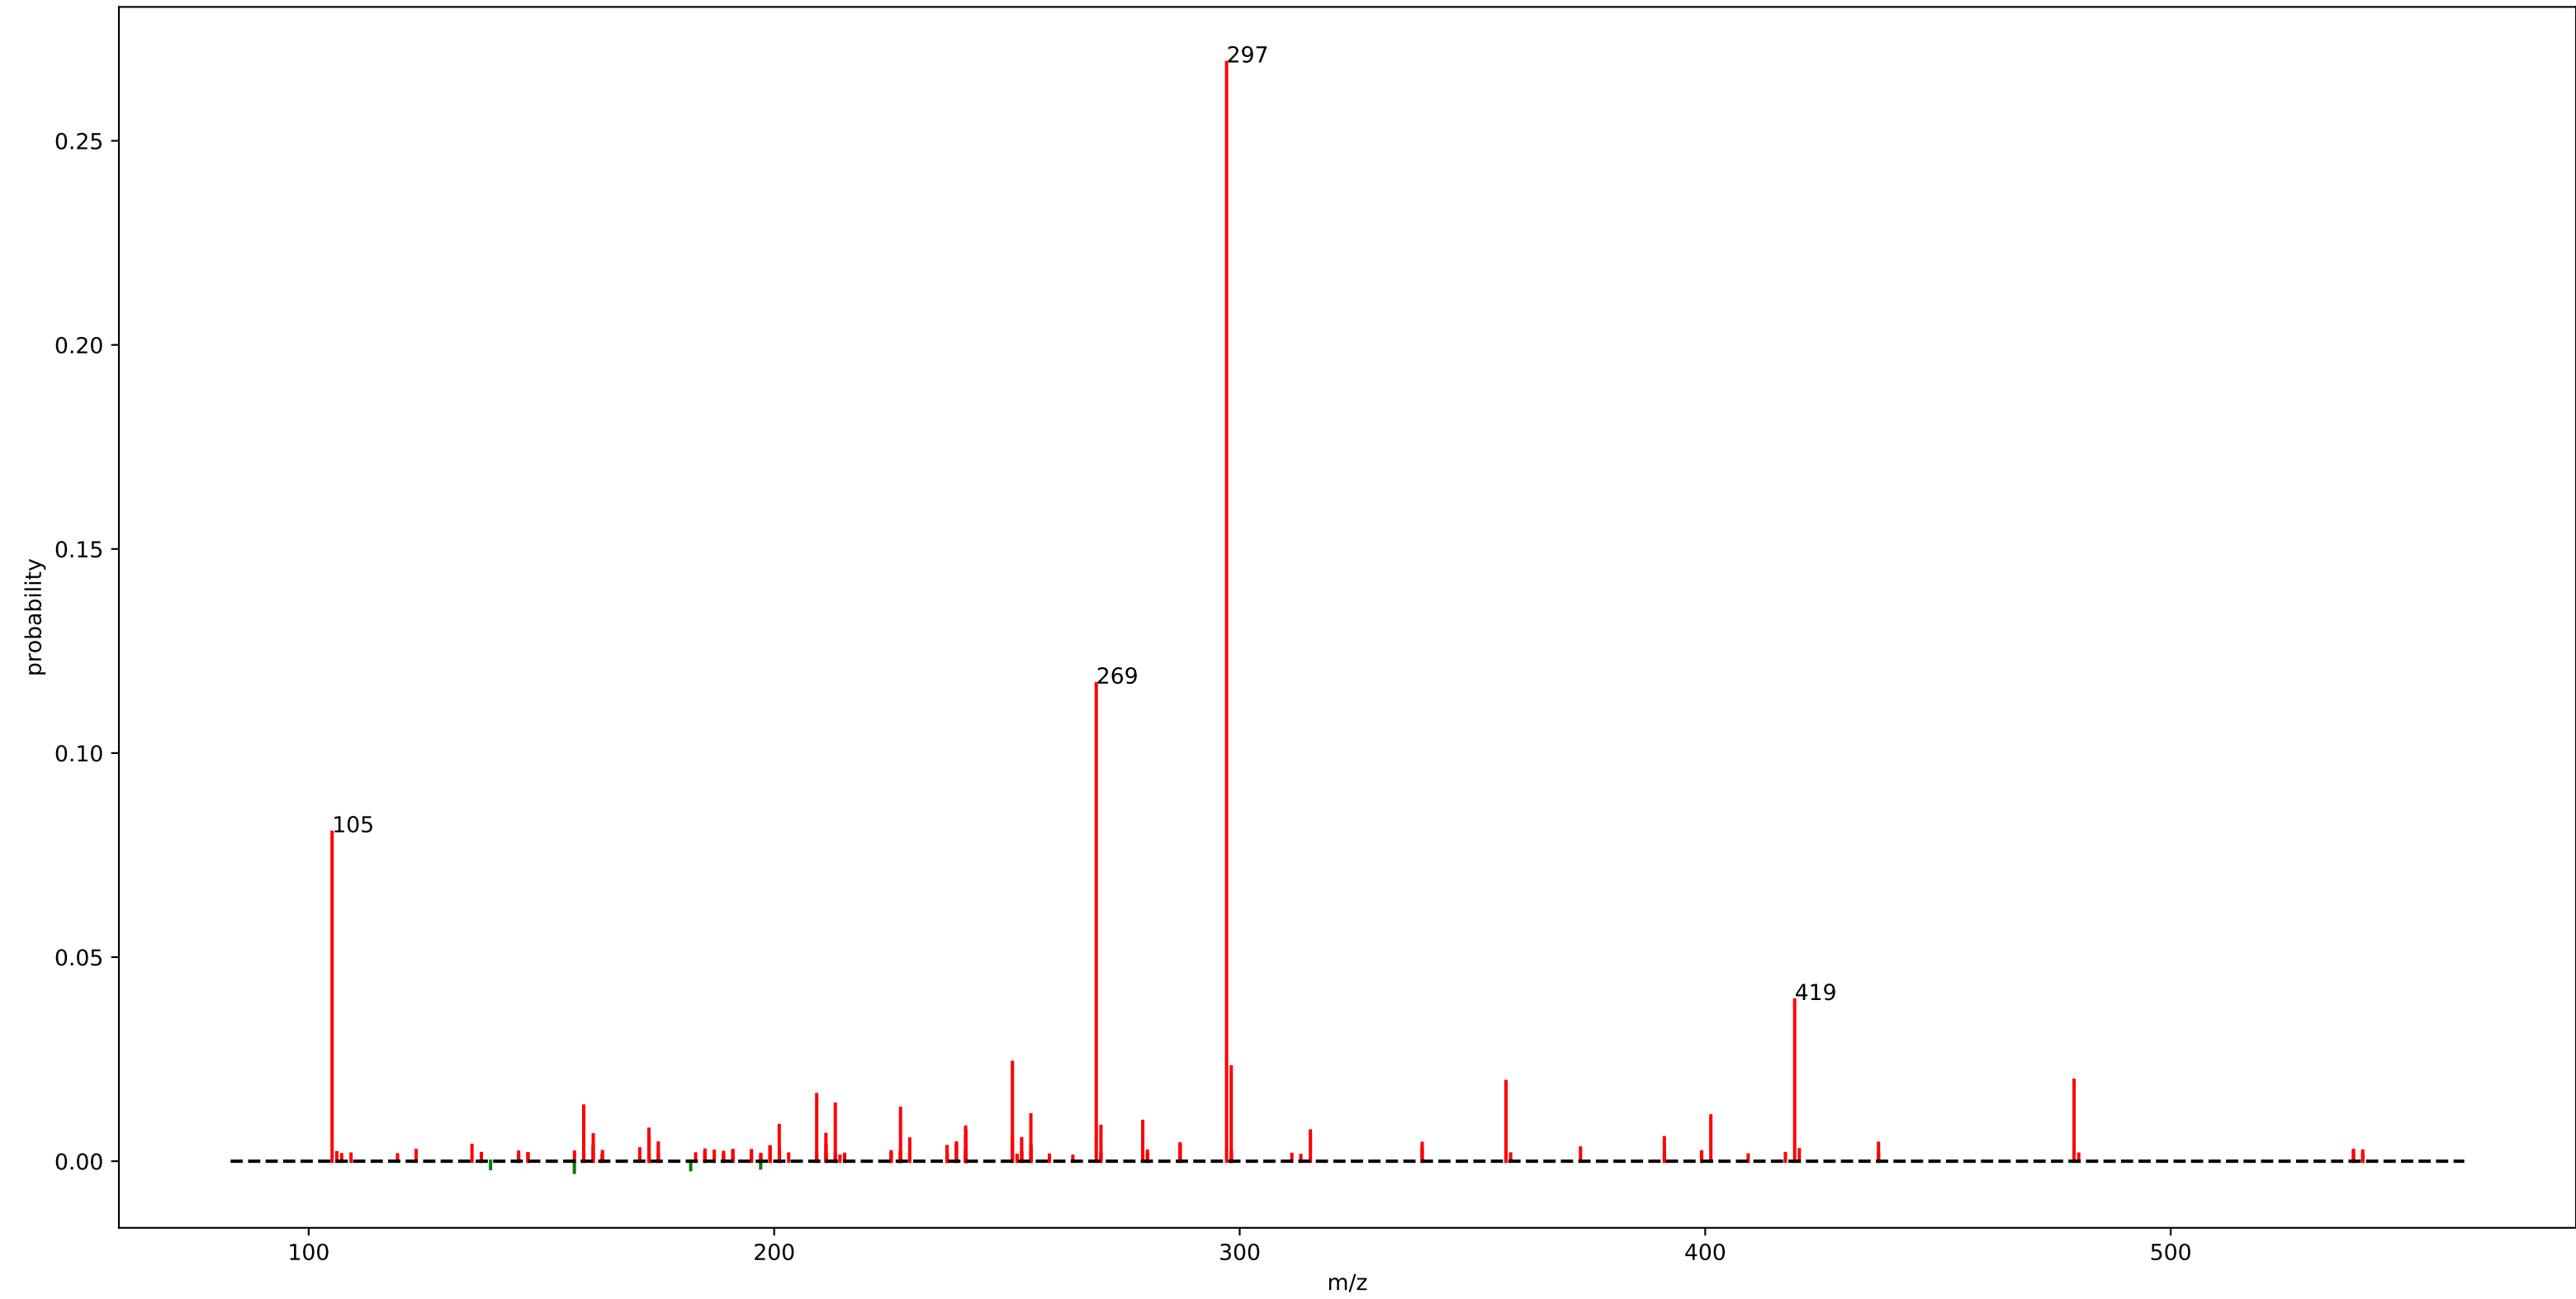

# euphorbia\_motif\_132.m2m

|                   |        |                   |        |
|-------------------|--------|-------------------|--------|
| fragment_297.1825 | : 0.27 | fragment_315.1925 | : 0.01 |
| fragment_269.1875 | : 0.12 | fragment_211.1075 | : 0.01 |
| fragment_105.0325 | : 0.08 | fragment_161.1325 | : 0.01 |
| fragment_419.2175 | : 0.04 | fragment_173.1325 | : 0.01 |
| fragment_251.1775 | : 0.02 | fragment_391.2275 | : 0.01 |
| fragment_298.1875 | : 0.02 | fragment_251.1825 | : 0.01 |
| fragment_479.2375 | : 0.02 | fragment_253.1575 | : 0.01 |
| fragment_357.2025 | : 0.02 | fragment_229.1175 | : 0.01 |
| fragment_209.1325 | : 0.02 |                   |        |
| fragment_213.1275 | : 0.01 |                   |        |
| fragment_159.0775 | : 0.01 |                   |        |
| fragment_227.1425 | : 0.01 |                   |        |
| fragment_255.1375 | : 0.01 |                   |        |
| fragment_401.2075 | : 0.01 |                   |        |
| fragment_279.1725 | : 0.01 |                   |        |
| fragment_201.0875 | : 0.01 |                   |        |
| fragment_270.1925 | : 0.01 |                   |        |
| fragment_241.1225 | : 0.01 |                   |        |
| fragment_173.0925 | : 0.01 |                   |        |
| fragment_241.1575 | : 0.01 |                   |        |

motif\_474

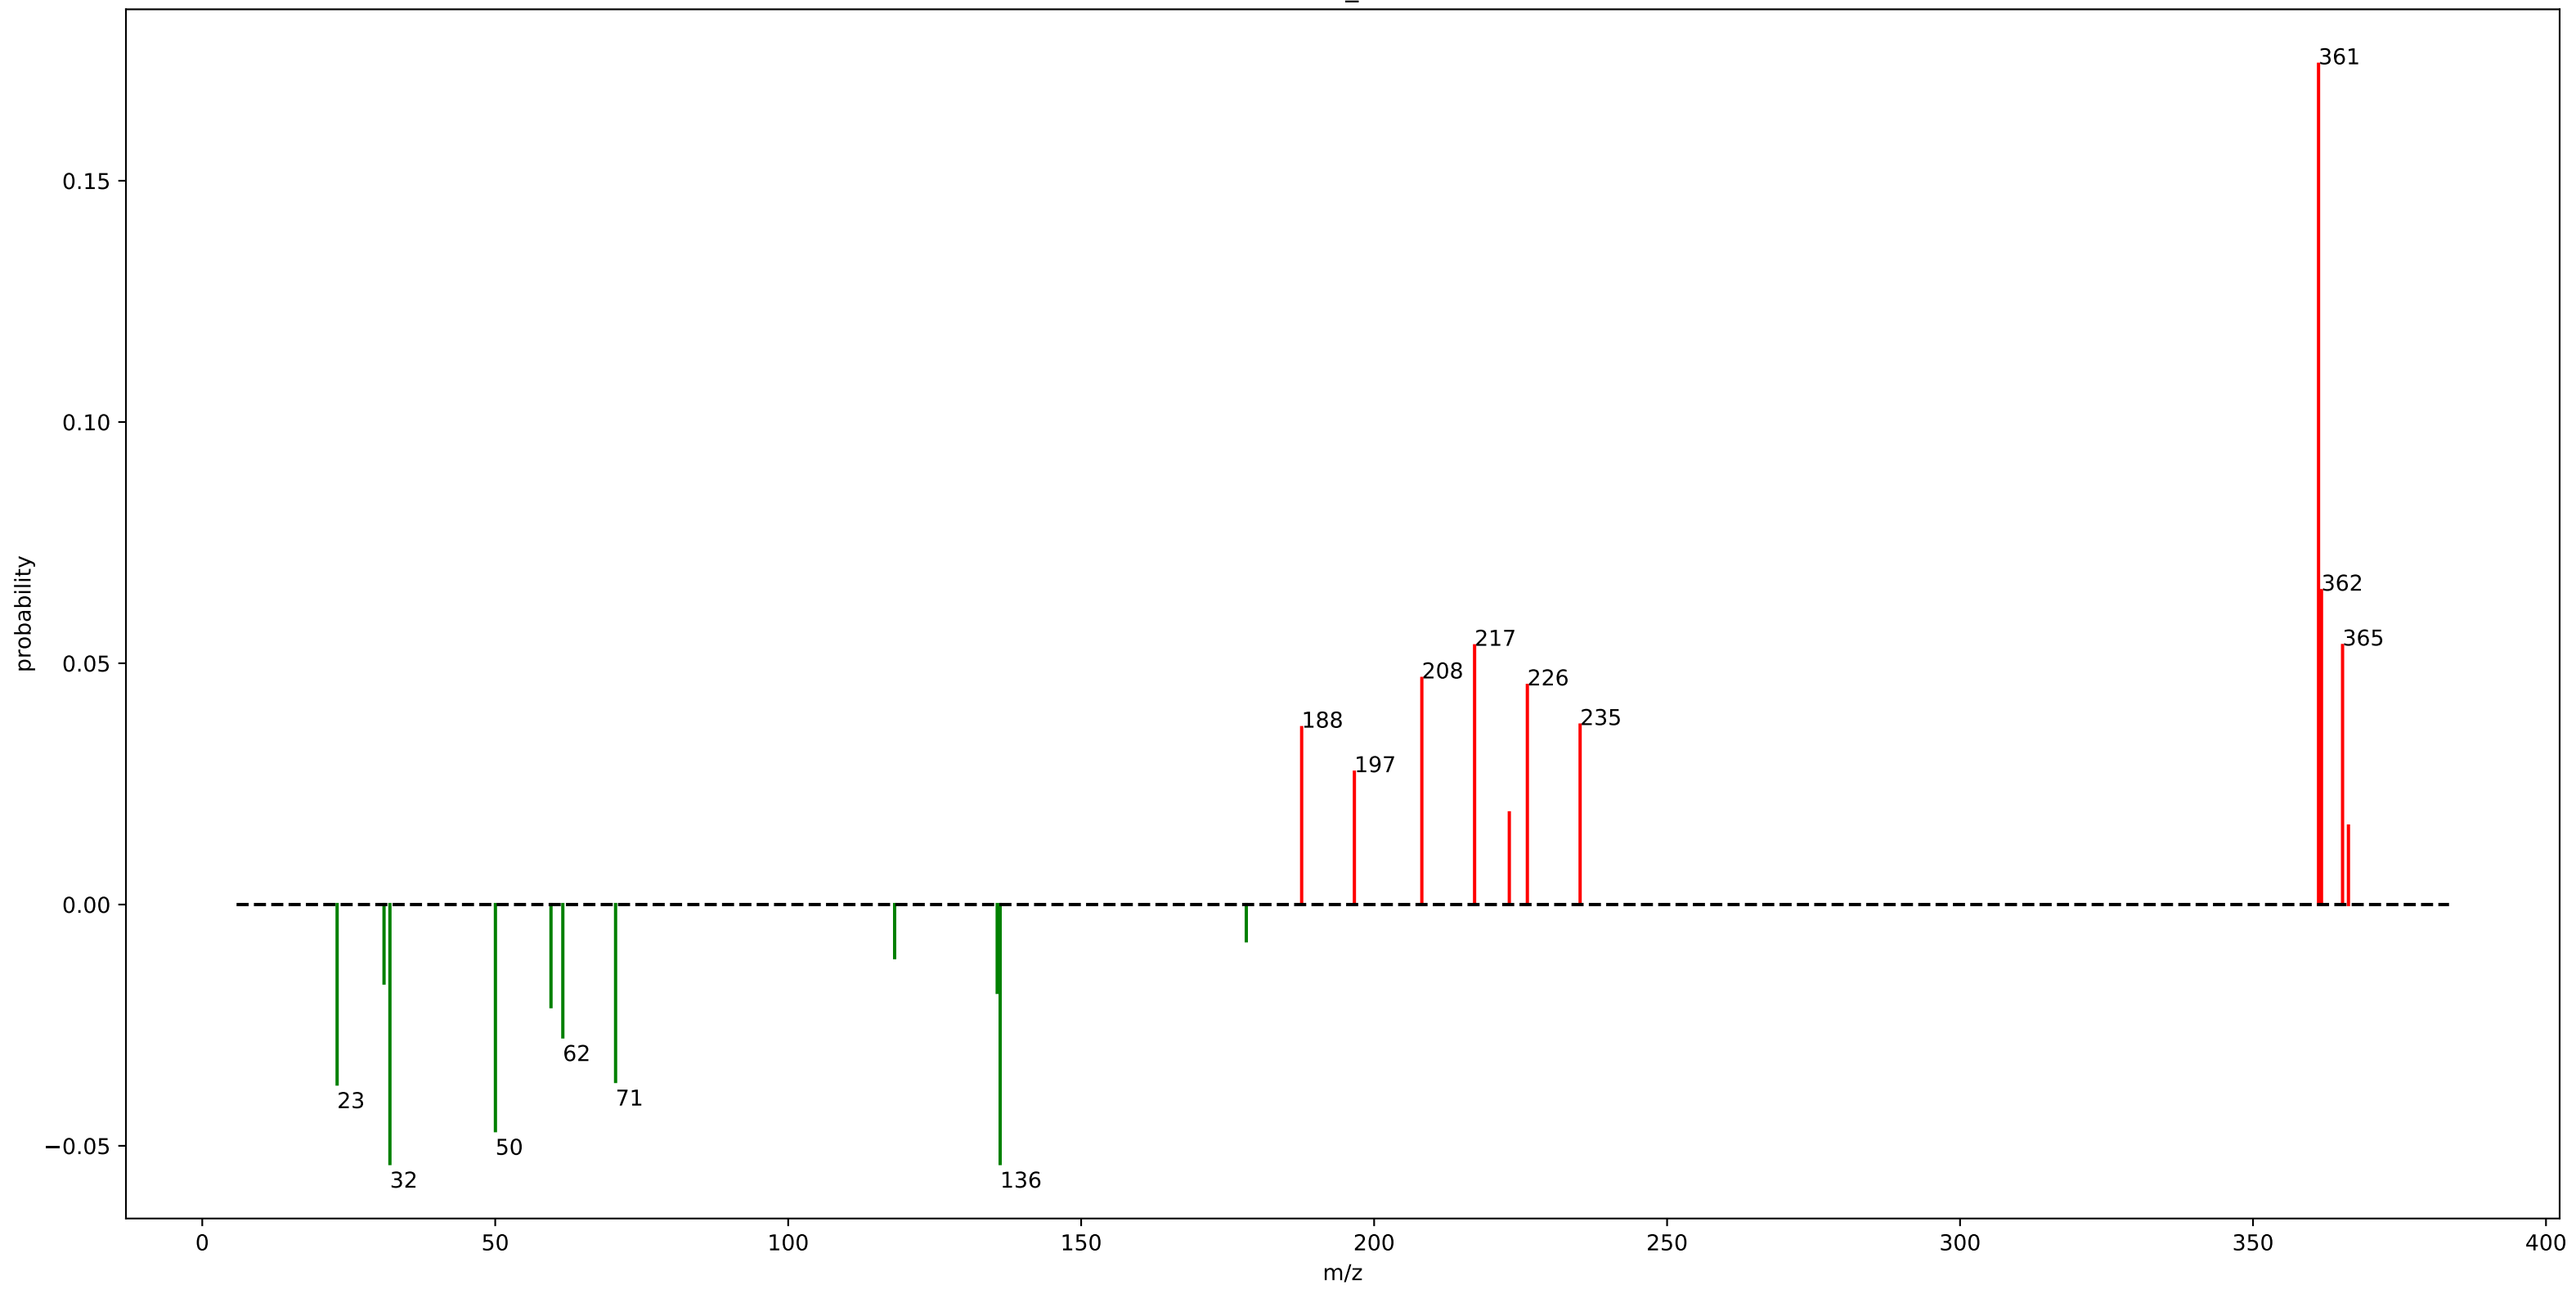

## motif\_474

|                   |        |               |        |
|-------------------|--------|---------------|--------|
| fragment_361.1825 | : 0.17 | loss_118.1675 | : 0.01 |
| fragment_361.6875 | : 0.07 | loss_178.1875 | : 0.01 |
| fragment_365.2825 | : 0.05 |               |        |
| loss_32.0275      | : 0.05 |               |        |
| loss_136.1775     | : 0.05 |               |        |
| fragment_217.1475 | : 0.05 |               |        |
| fragment_208.1425 | : 0.05 |               |        |
| loss_50.0325      | : 0.05 |               |        |
| fragment_226.1525 | : 0.05 |               |        |
| fragment_235.1575 | : 0.04 |               |        |
| loss_23.0175      | : 0.04 |               |        |
| loss_70.5425      | : 0.04 |               |        |
| fragment_187.6325 | : 0.04 |               |        |
| fragment_196.6325 | : 0.03 |               |        |
| loss_61.5375      | : 0.03 |               |        |
| loss_59.5175      | : 0.02 |               |        |
| fragment_223.0725 | : 0.02 |               |        |
| loss_135.6725     | : 0.02 |               |        |
| loss_31.0225      | : 0.02 |               |        |
| fragment_366.2875 | : 0.02 |               |        |



motif\_475

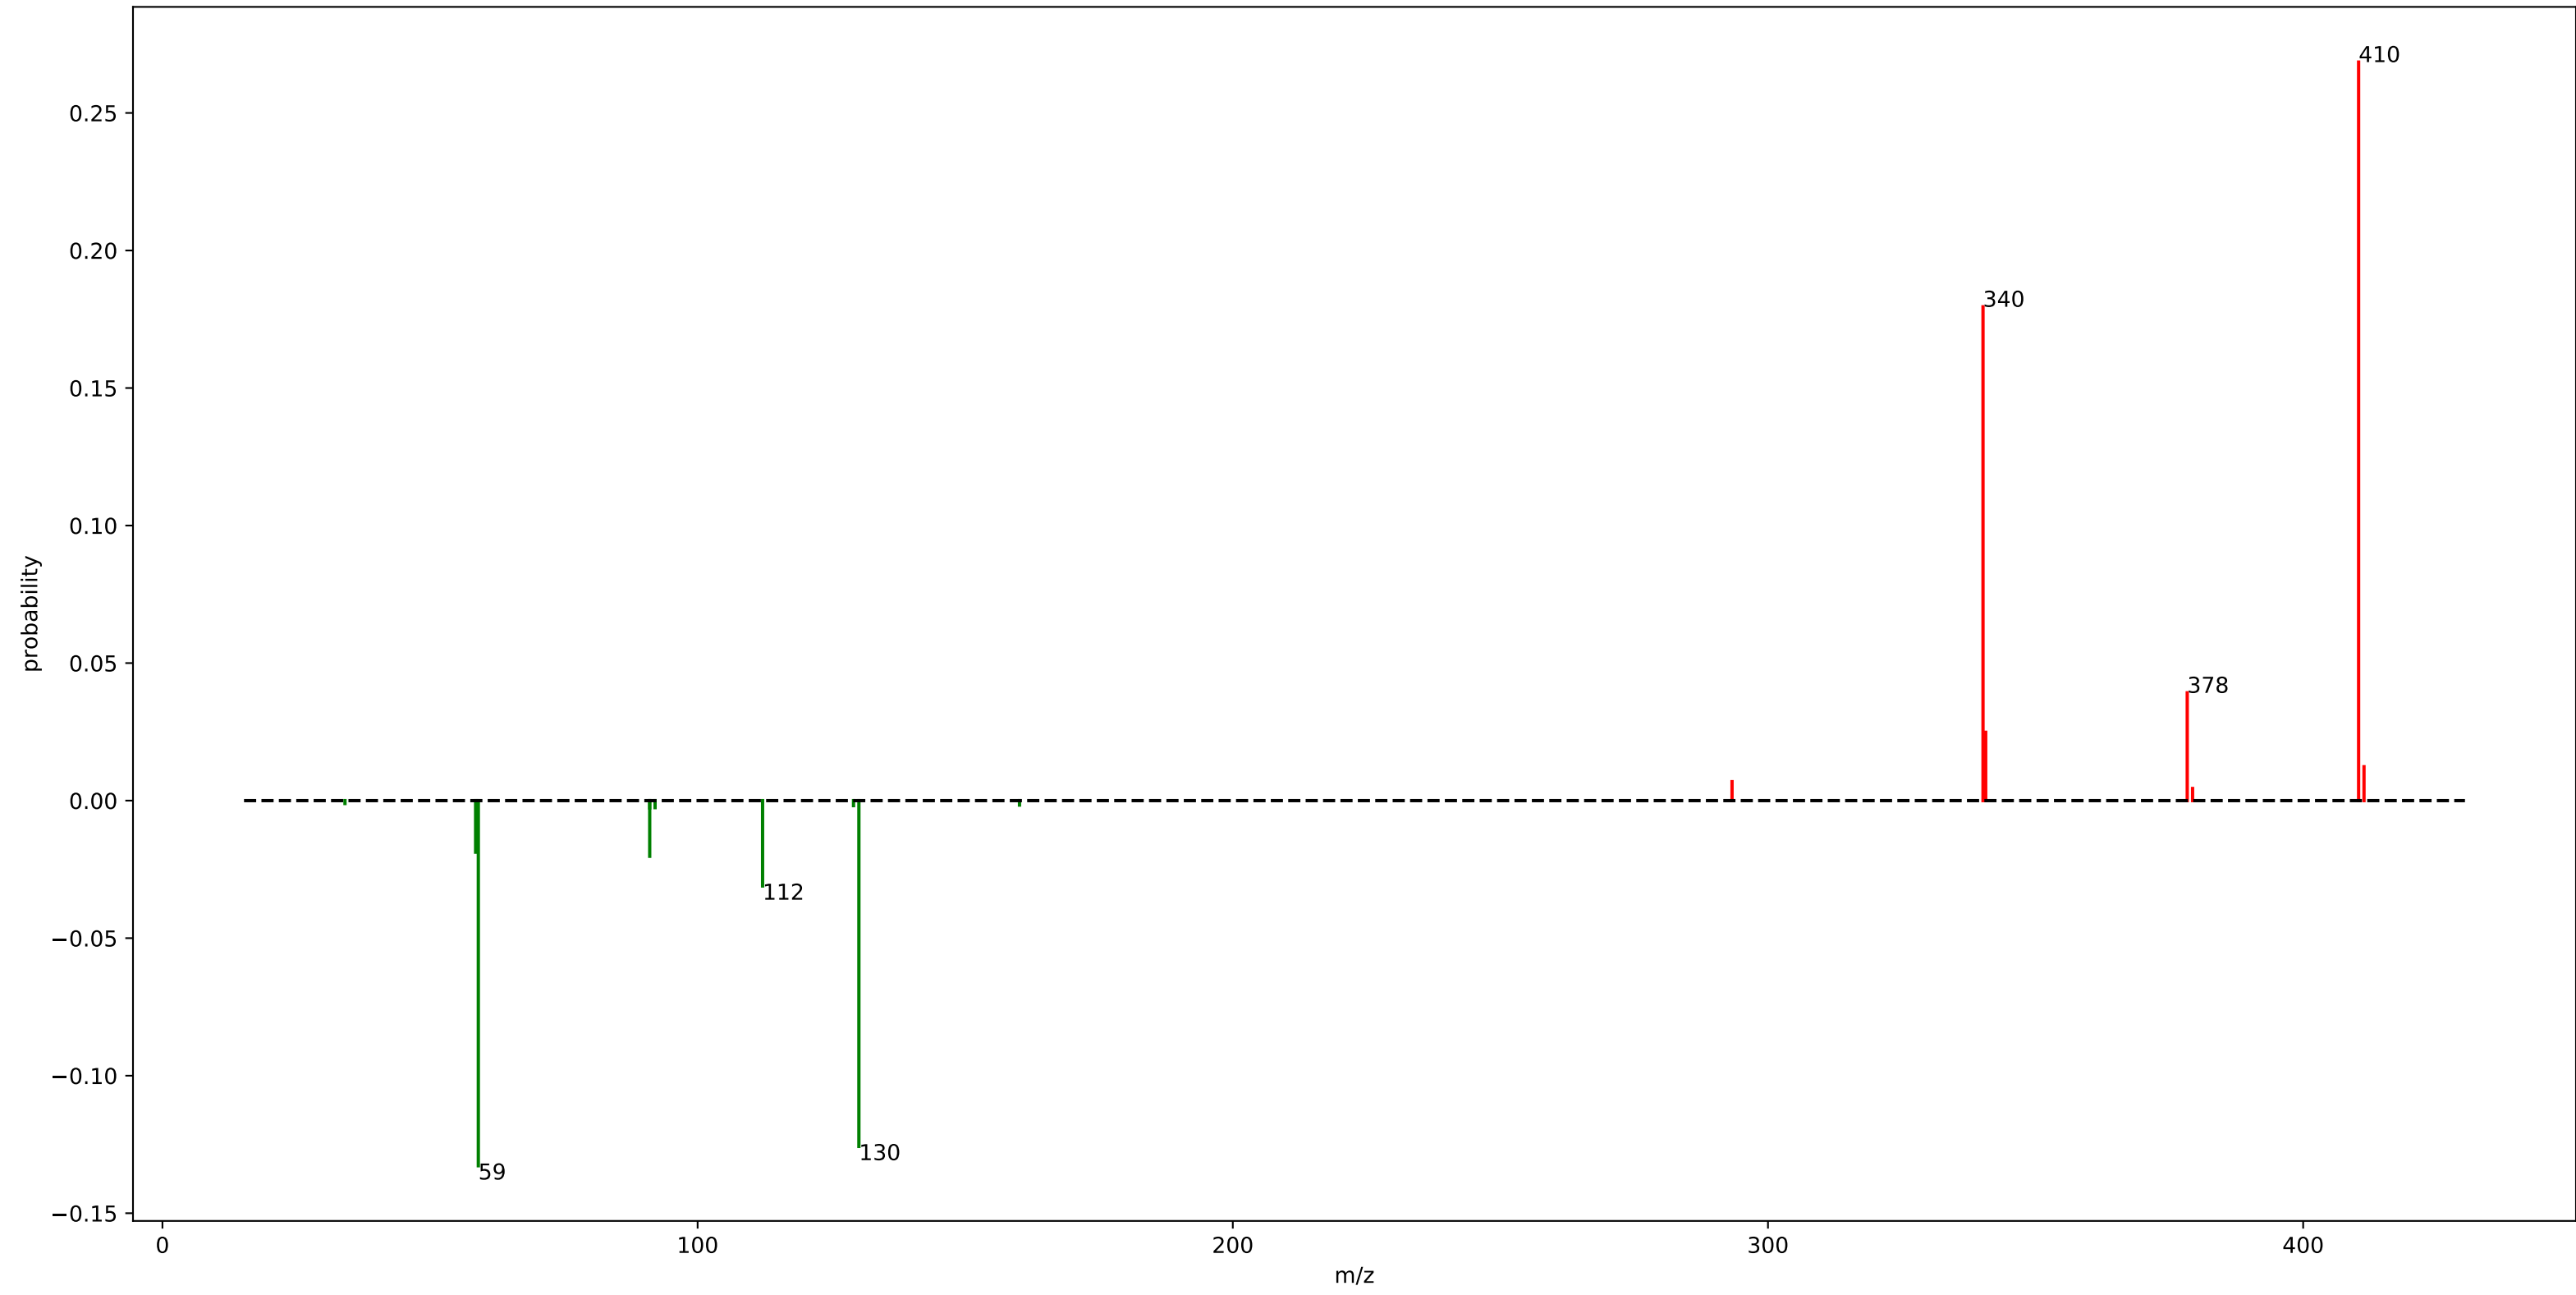

## motif\_475

|                   |        |
|-------------------|--------|
| fragment_410.3625 | : 0.27 |
| fragment_340.1775 | : 0.18 |
| loss_59.0225      | : 0.13 |
| loss_130.1325     | : 0.13 |
| fragment_378.3375 | : 0.04 |
| loss_112.1375     | : 0.03 |
| fragment_340.6825 | : 0.02 |
| loss_91.0475      | : 0.02 |
| loss_58.5175      | : 0.02 |
| fragment_411.3675 | : 0.01 |
| fragment_293.2825 | : 0.01 |

motif\_476

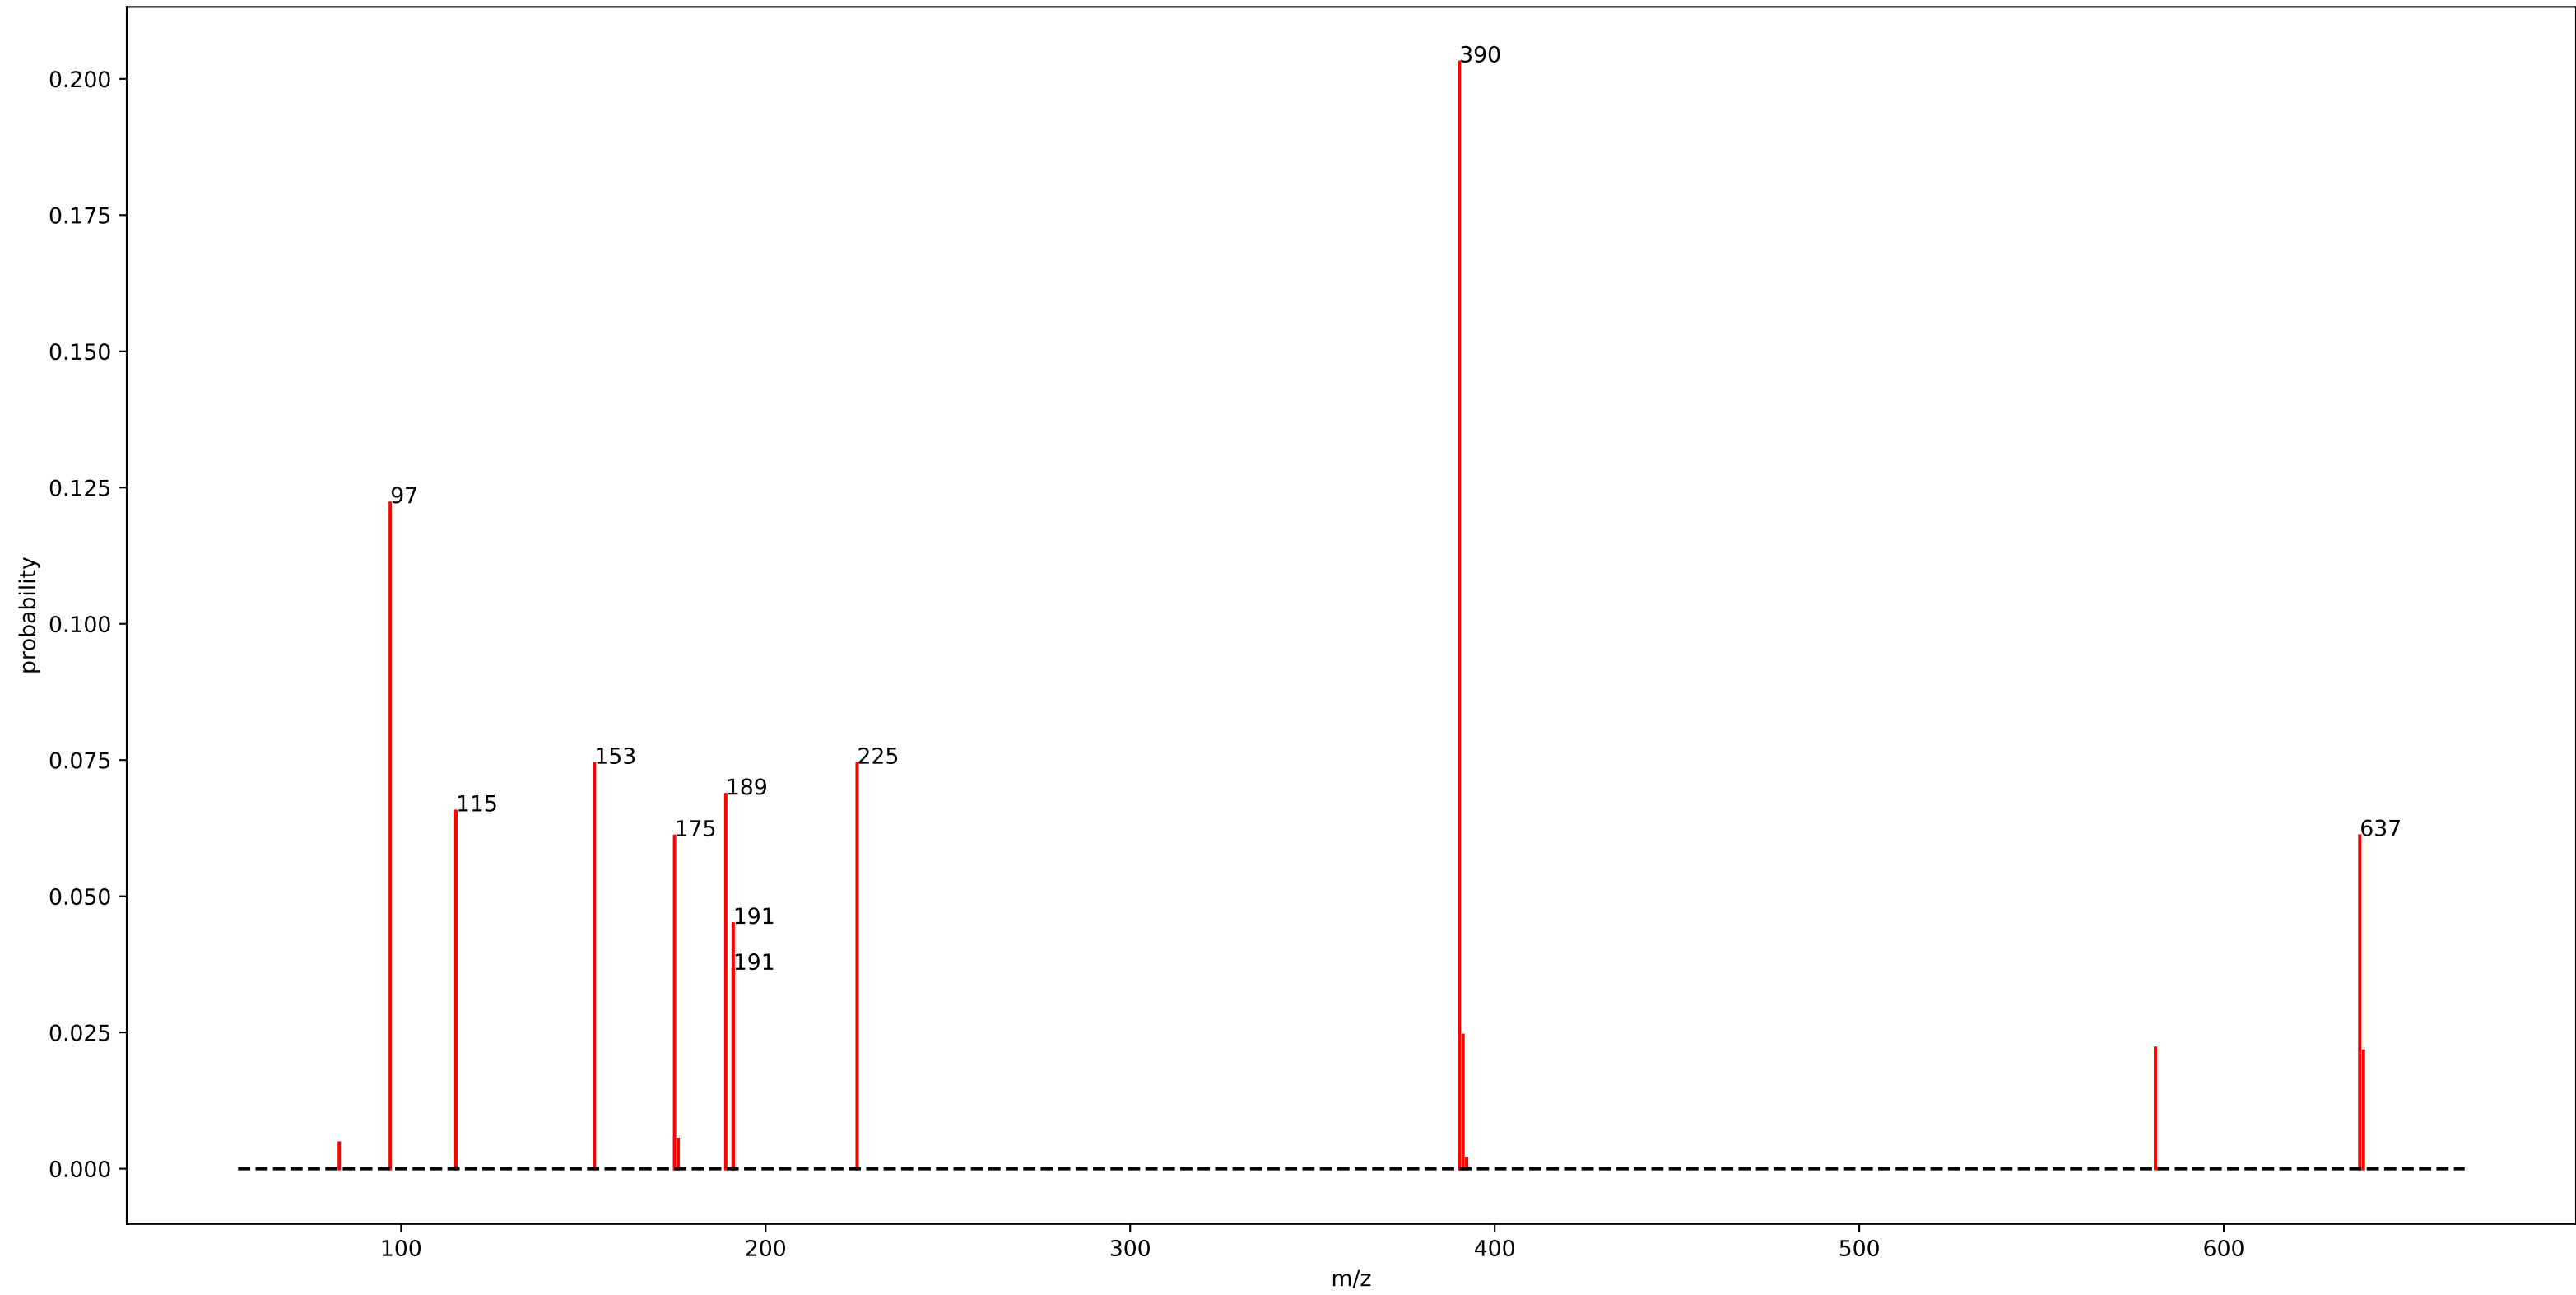

## motif\_476

|                   |        |
|-------------------|--------|
| fragment_390.2975 | : 0.20 |
| fragment_97.0275  | : 0.12 |
| fragment_225.0975 | : 0.07 |
| fragment_153.0525 | : 0.07 |
| fragment_189.0725 | : 0.07 |
| fragment_115.0375 | : 0.07 |
| fragment_637.3025 | : 0.06 |
| fragment_175.0125 | : 0.06 |
| fragment_191.0925 | : 0.04 |
| fragment_191.0875 | : 0.04 |
| fragment_391.3025 | : 0.02 |
| fragment_581.2425 | : 0.02 |
| fragment_638.3075 | : 0.02 |
| fragment_176.0175 | : 0.01 |

motif\_477

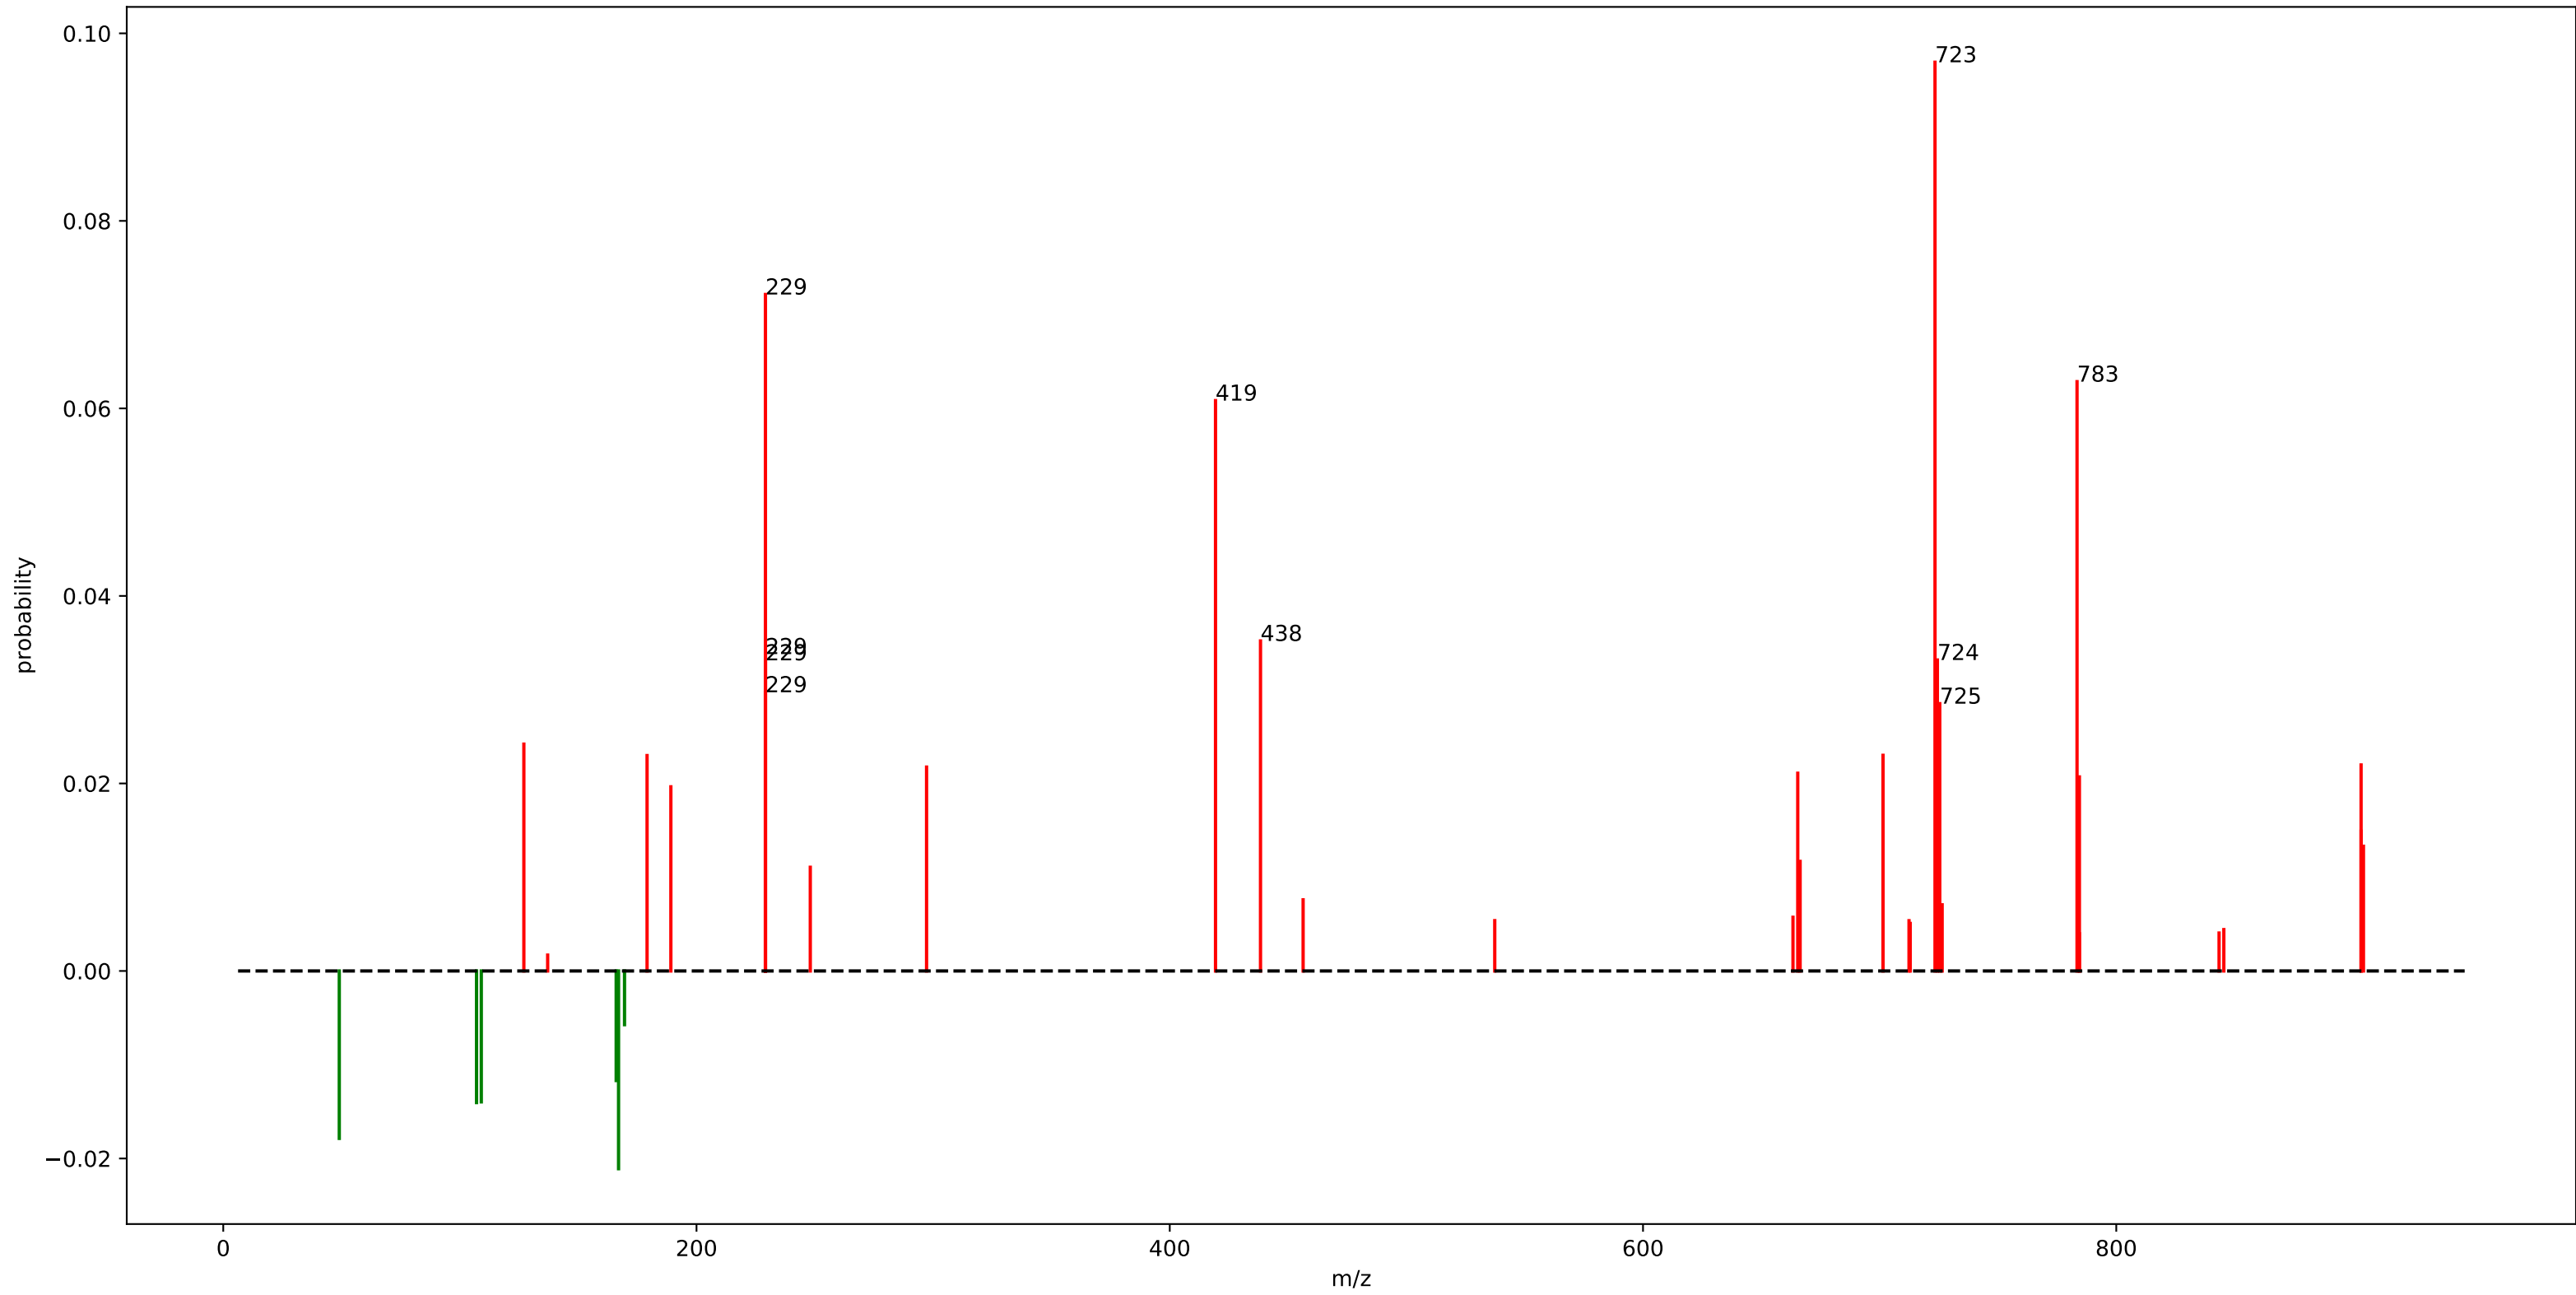

# motif\_477

|                   |        |                   |        |
|-------------------|--------|-------------------|--------|
| fragment_723.3975 | : 0.10 | loss_49.0325      | : 0.02 |
| fragment_229.1325 | : 0.07 | fragment_903.4625 | : 0.01 |
| fragment_783.4175 | : 0.06 | loss_107.0375     | : 0.01 |
| fragment_419.3325 | : 0.06 | loss_109.0525     | : 0.01 |
| fragment_438.3475 | : 0.04 | fragment_904.4625 | : 0.01 |
| fragment_229.1425 | : 0.03 | fragment_666.3925 | : 0.01 |
| fragment_724.3975 | : 0.03 | loss_166.0525     | : 0.01 |
| fragment_229.1225 | : 0.03 | fragment_248.0825 | : 0.01 |
| fragment_229.0925 | : 0.03 | fragment_456.3575 | : 0.01 |
| fragment_725.4075 | : 0.03 | fragment_726.4125 | : 0.01 |
| fragment_127.0375 | : 0.02 | fragment_663.3775 | : 0.01 |
| fragment_701.4275 | : 0.02 | loss_169.5775     | : 0.01 |
| fragment_179.1075 | : 0.02 | fragment_537.3425 | : 0.01 |
| fragment_229.1075 | : 0.02 | fragment_712.4125 | : 0.01 |
| fragment_903.4575 | : 0.02 | fragment_712.9125 | : 0.01 |
| fragment_297.2225 | : 0.02 |                   |        |
| fragment_665.3925 | : 0.02 |                   |        |
| loss_167.0575     | : 0.02 |                   |        |
| fragment_784.4175 | : 0.02 |                   |        |
| fragment_189.1625 | : 0.02 |                   |        |

motif\_470

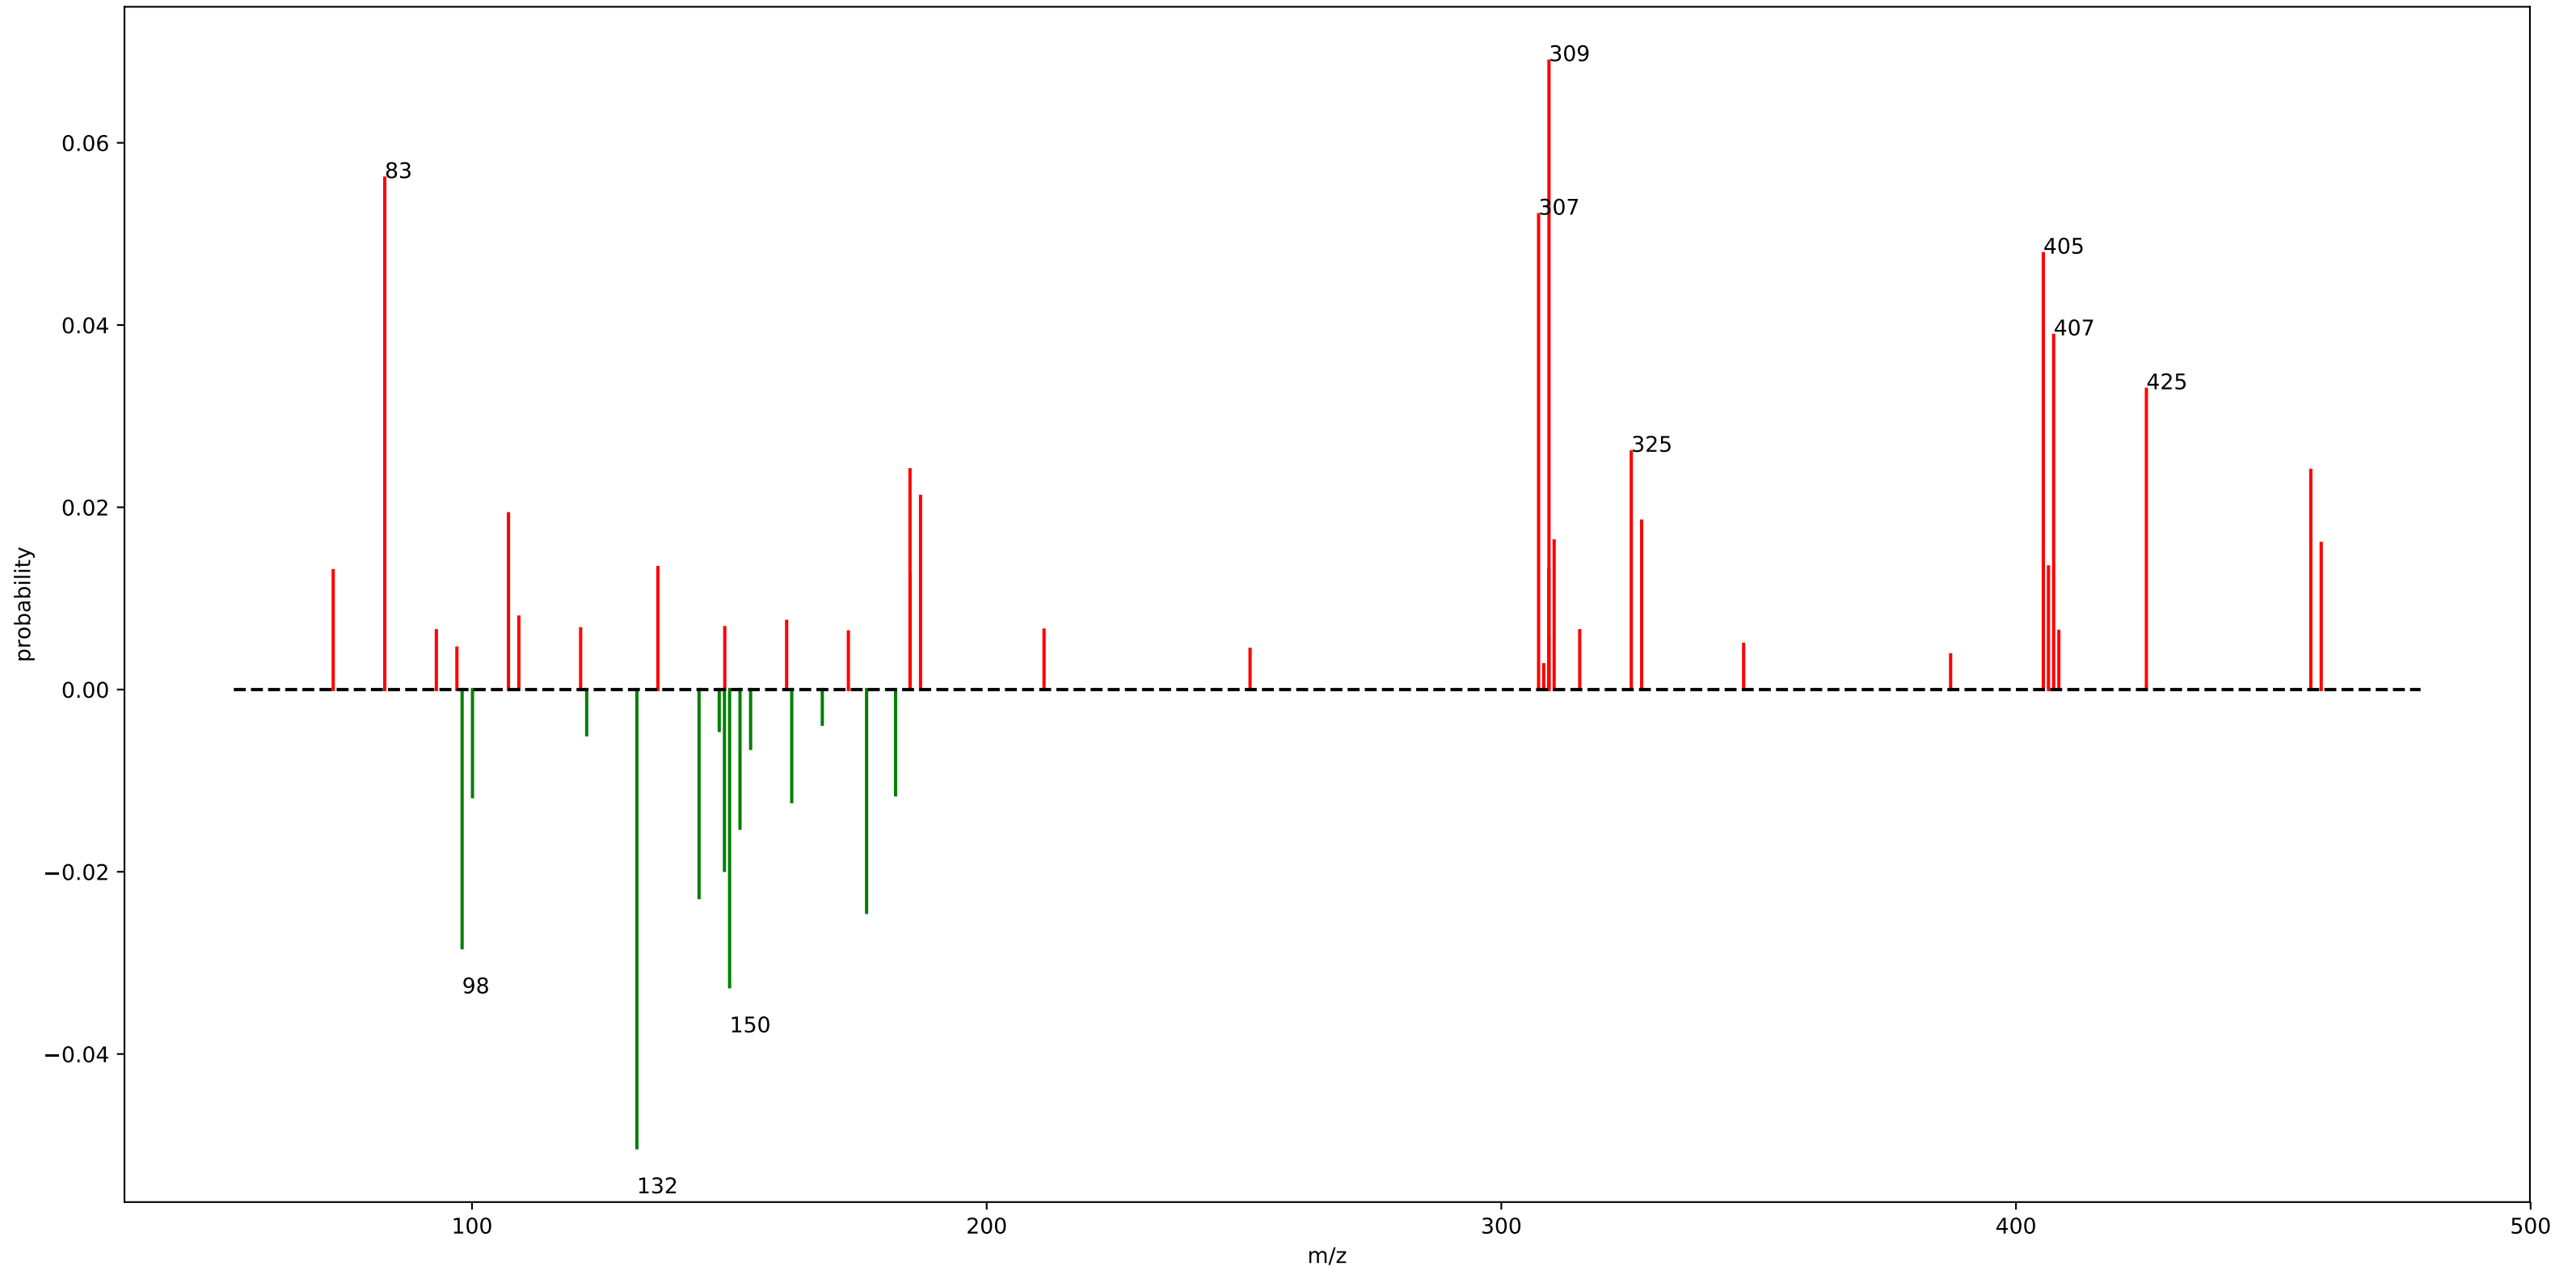

# motif\_470

|                   |        |                   |        |                   |        |
|-------------------|--------|-------------------|--------|-------------------|--------|
| fragment_309.2575 | : 0.07 | fragment_405.3125 | : 0.02 | fragment_309.2325 | : 0.01 |
| fragment_83.0475  | : 0.06 | loss_152.0675     | : 0.02 |                   |        |
| fragment_307.2425 | : 0.05 | fragment_406.3175 | : 0.01 |                   |        |
| loss_132.0375     | : 0.05 | fragment_136.1175 | : 0.01 |                   |        |
| fragment_405.3175 | : 0.05 | fragment_309.2375 | : 0.01 |                   |        |
| fragment_407.3275 | : 0.04 | fragment_73.0275  | : 0.01 |                   |        |
| fragment_425.3425 | : 0.03 | fragment_185.1325 | : 0.01 |                   |        |
| loss_150.0475     | : 0.03 | loss_162.1225     | : 0.01 |                   |        |
| loss_98.0725      | : 0.03 | loss_100.0875     | : 0.01 |                   |        |
| fragment_325.2525 | : 0.03 | loss_182.3025     | : 0.01 |                   |        |
| loss_176.6675     | : 0.02 | fragment_109.0975 | : 0.01 |                   |        |
| fragment_185.1025 | : 0.02 | fragment_161.1325 | : 0.01 |                   |        |
| fragment_457.2925 | : 0.02 | fragment_149.1125 | : 0.01 |                   |        |
| loss_144.1125     | : 0.02 | fragment_121.1025 | : 0.01 |                   |        |
| fragment_187.1475 | : 0.02 | fragment_211.1475 | : 0.01 |                   |        |
| loss_149.0475     | : 0.02 | fragment_93.0675  | : 0.01 |                   |        |
| fragment_107.0825 | : 0.02 | fragment_315.2325 | : 0.01 |                   |        |
| fragment_327.2675 | : 0.02 | loss_154.1325     | : 0.01 |                   |        |
| fragment_310.2625 | : 0.02 | fragment_408.3325 | : 0.01 |                   |        |
| fragment_459.3075 | : 0.02 | fragment_173.1325 | : 0.01 |                   |        |



gnps\_motif\_72.m2m

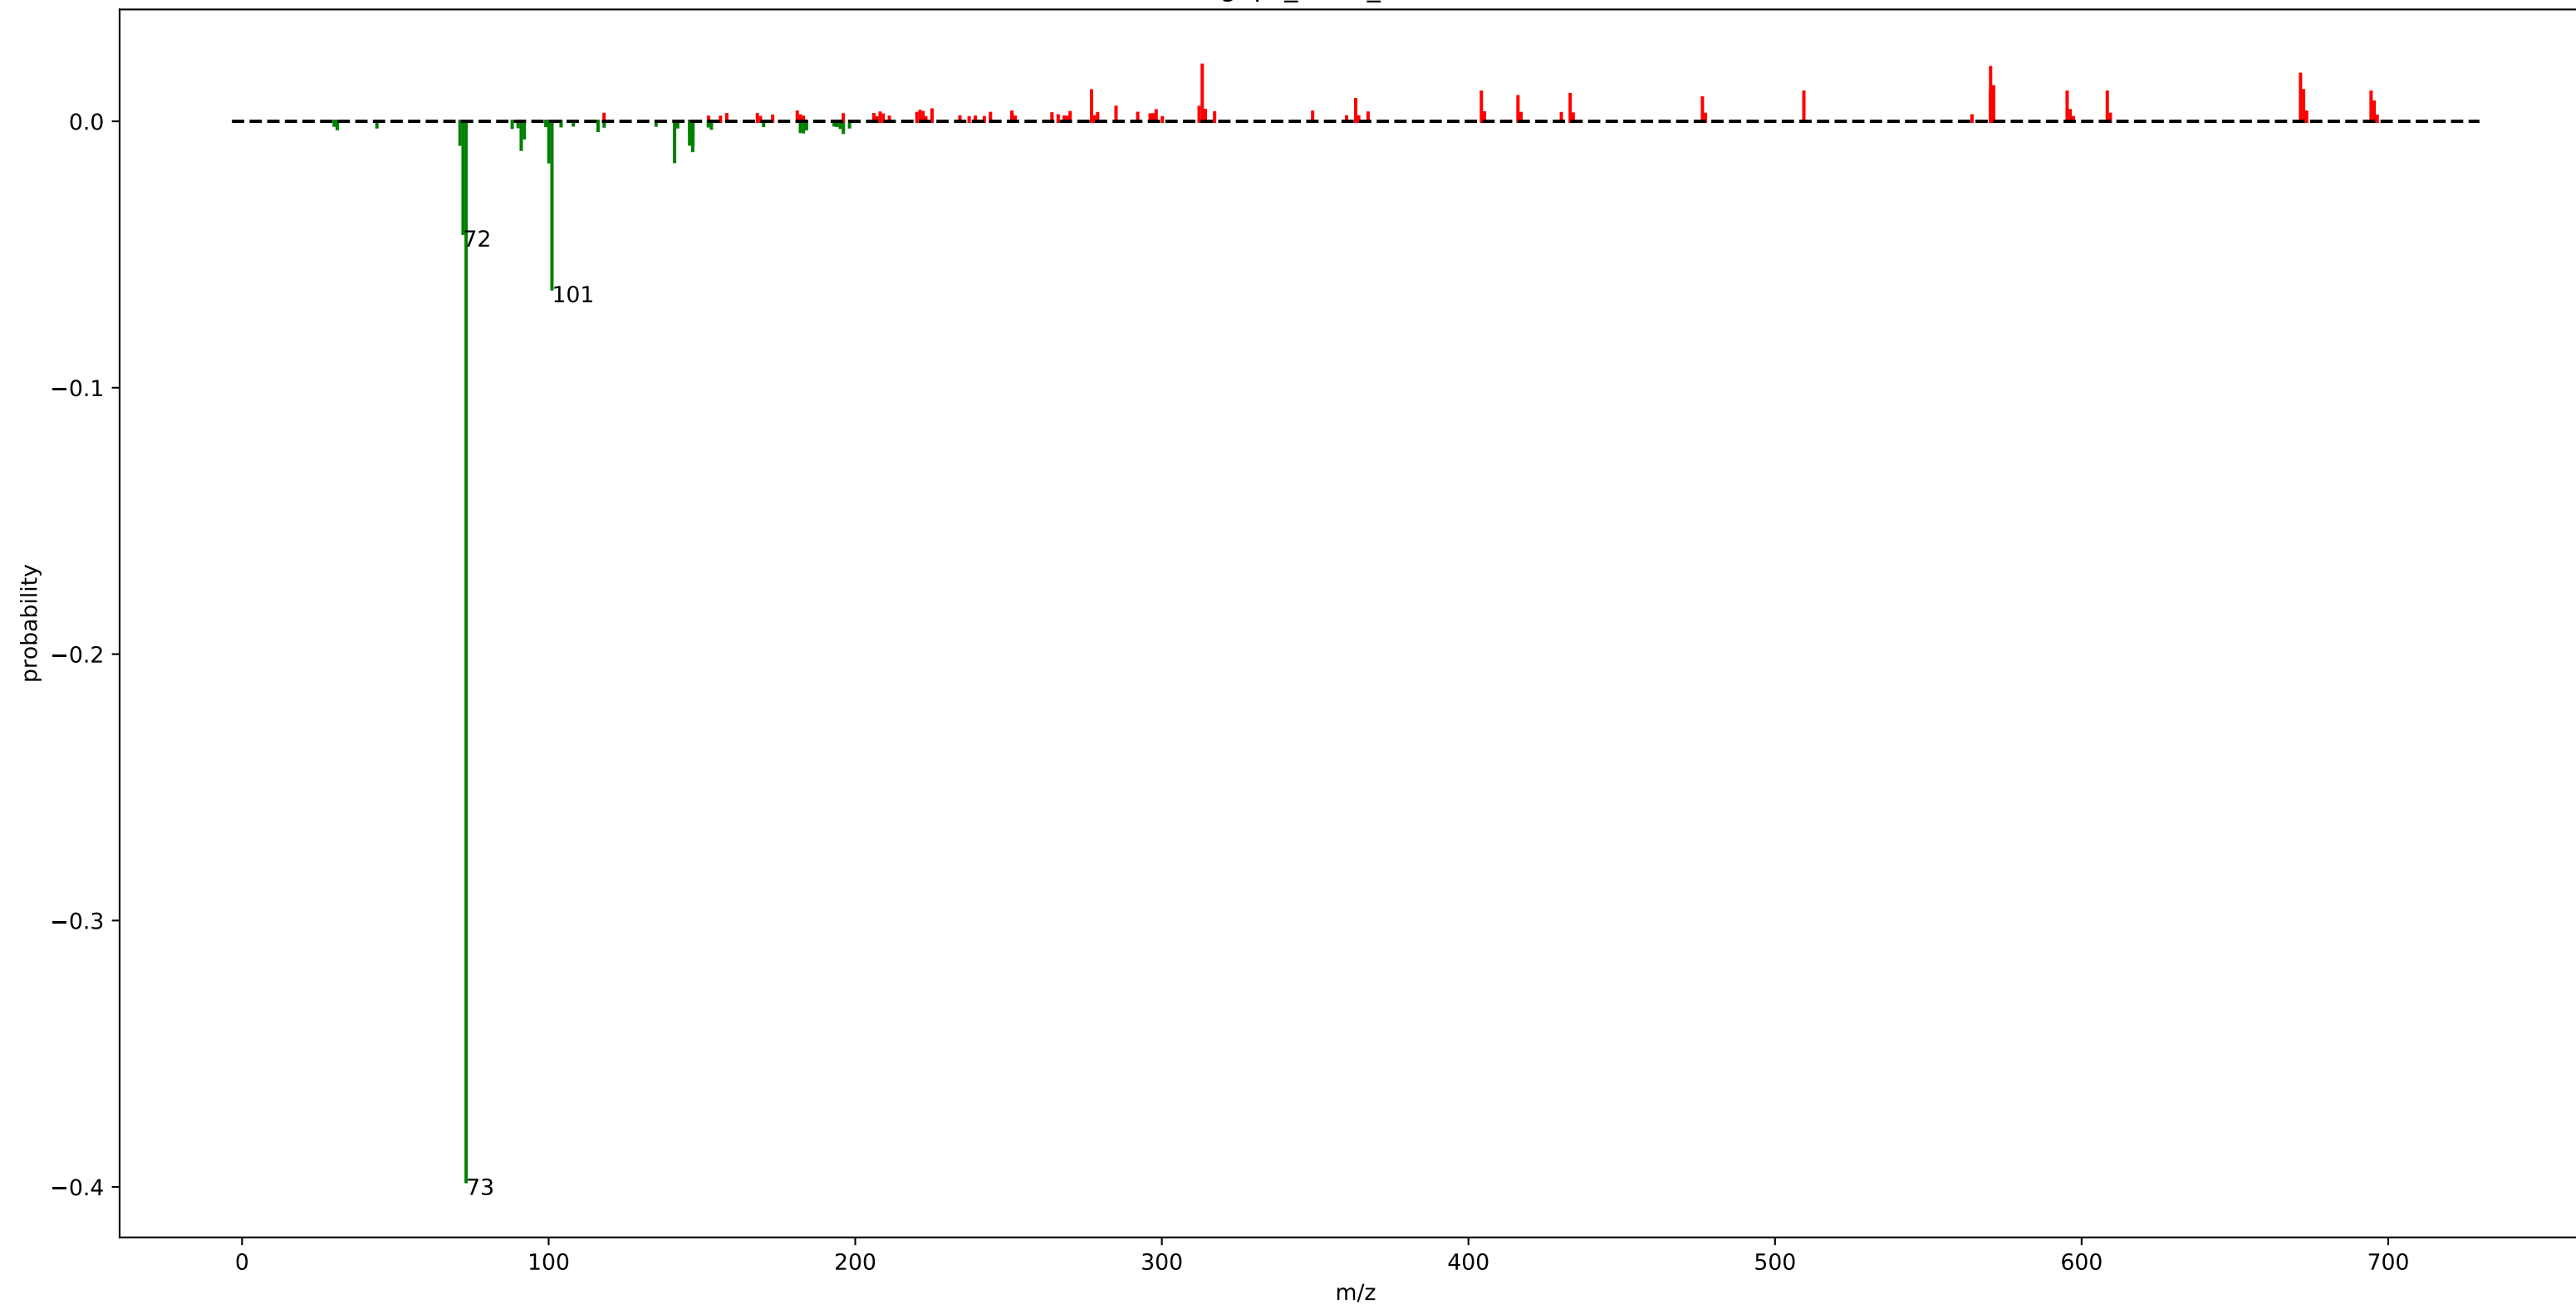

# gnps\_motif\_72.m2m

|                   |        |                   |        |
|-------------------|--------|-------------------|--------|
| loss_73.0875      | : 0.40 | fragment_416.1575 | : 0.01 |
| loss_101.0825     | : 0.06 | fragment_476.3125 | : 0.01 |
| loss_72.0875      | : 0.04 | loss_147.0675     | : 0.01 |
| fragment_313.1775 | : 0.02 | loss_71.0925      | : 0.01 |
| fragment_570.3075 | : 0.02 | loss_145.9825     | : 0.01 |
| fragment_671.3925 | : 0.02 | fragment_363.2275 | : 0.01 |
| loss_100.0825     | : 0.02 | fragment_695.4225 | : 0.01 |
| loss_141.0775     | : 0.02 | loss_92.0625      | : 0.01 |
| fragment_571.3075 | : 0.01 | fragment_285.0625 | : 0.01 |
| fragment_672.3925 | : 0.01 | fragment_312.1675 | : 0.01 |
| fragment_277.0675 | : 0.01 |                   |        |
| loss_146.9775     | : 0.01 |                   |        |
| fragment_509.4025 | : 0.01 |                   |        |
| fragment_694.4175 | : 0.01 |                   |        |
| fragment_570.3025 | : 0.01 |                   |        |
| fragment_595.2775 | : 0.01 |                   |        |
| fragment_404.2325 | : 0.01 |                   |        |
| fragment_608.3675 | : 0.01 |                   |        |
| loss_91.0575      | : 0.01 |                   |        |
| fragment_433.1875 | : 0.01 |                   |        |

motif\_472

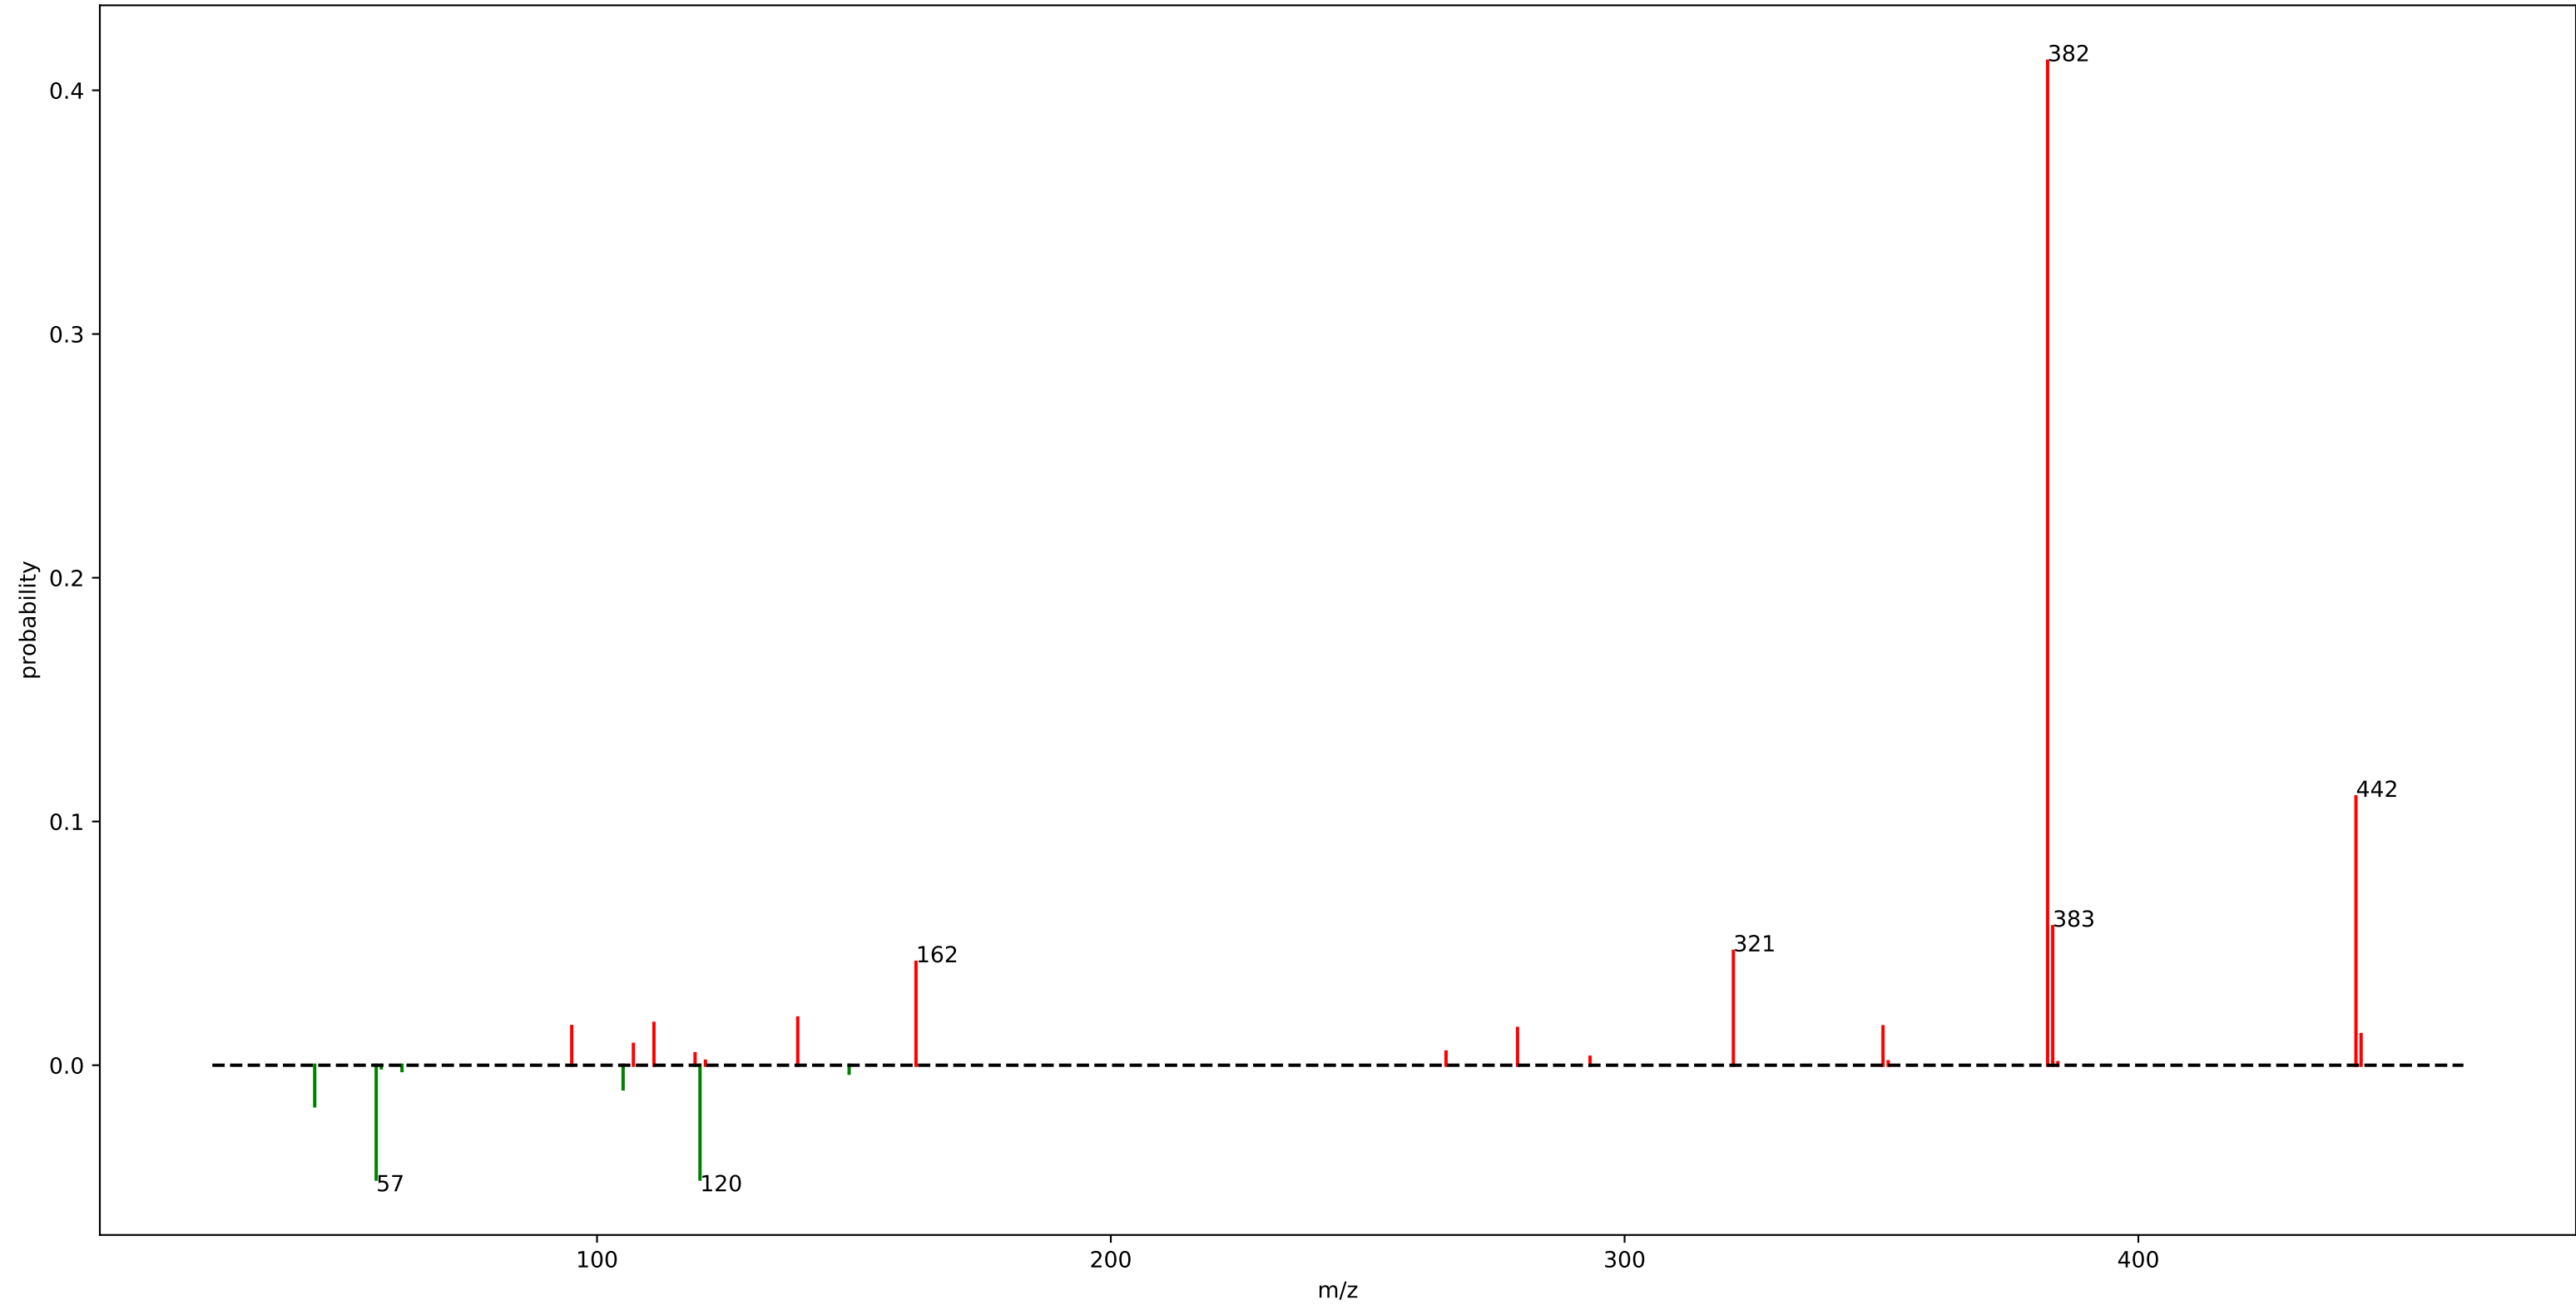

## motif\_472

|                   |        |
|-------------------|--------|
| fragment_382.3325 | : 0.41 |
| fragment_442.3525 | : 0.11 |
| fragment_383.3325 | : 0.06 |
| loss_57.0225      | : 0.05 |
| fragment_321.1775 | : 0.05 |
| loss_120.0425     | : 0.05 |
| fragment_162.0875 | : 0.04 |
| fragment_139.0725 | : 0.02 |
| fragment_111.0825 | : 0.02 |
| loss_45.0525      | : 0.02 |
| fragment_95.0825  | : 0.02 |
| fragment_350.3025 | : 0.02 |
| fragment_279.1675 | : 0.02 |
| fragment_443.3575 | : 0.01 |
| loss_105.0775     | : 0.01 |
| fragment_107.0825 | : 0.01 |
| fragment_265.2525 | : 0.01 |

motif\_473

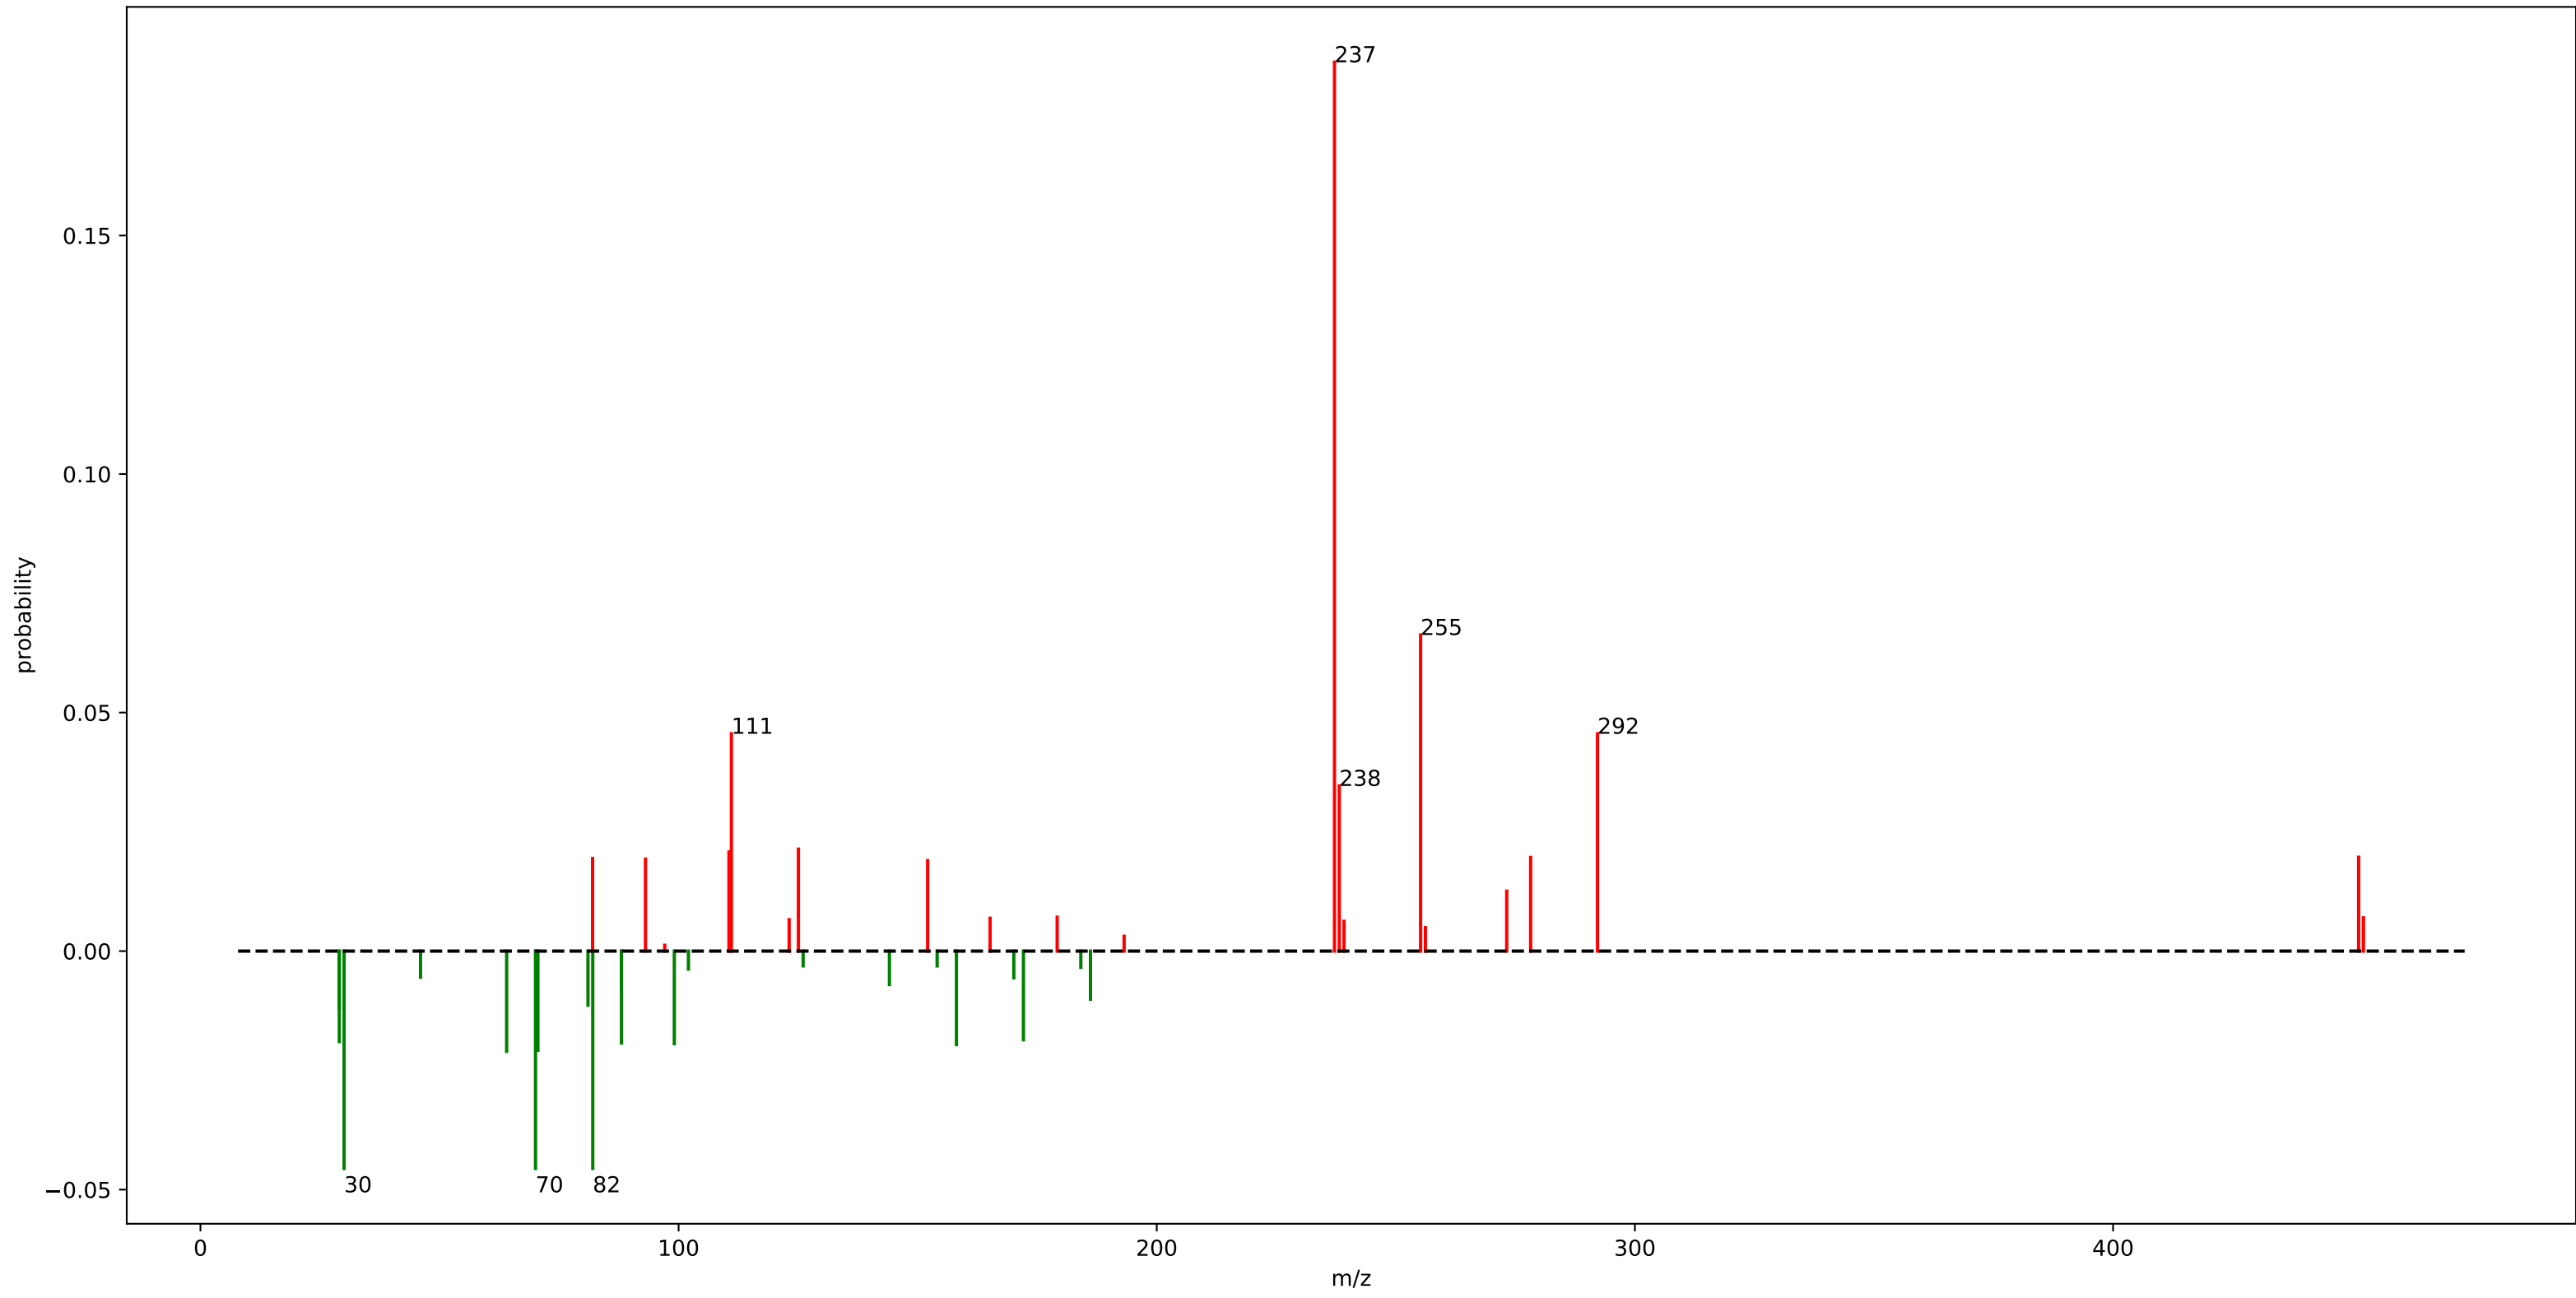

# motif\_473

|                   |        |                   |        |
|-------------------|--------|-------------------|--------|
| fragment_237.1675 | : 0.19 | loss_29.0425      | : 0.02 |
| fragment_255.1775 | : 0.07 | loss_172.1225     | : 0.02 |
| fragment_111.0425 | : 0.05 | fragment_273.1925 | : 0.01 |
| loss_70.0775      | : 0.05 | loss_29.0375      | : 0.01 |
| loss_30.0425      | : 0.05 | loss_81.0525      | : 0.01 |
| loss_82.0525      | : 0.05 | loss_186.1425     | : 0.01 |
| fragment_292.1825 | : 0.05 | loss_88.0325      | : 0.01 |
| fragment_238.1725 | : 0.03 | fragment_179.1775 | : 0.01 |
| fragment_125.0575 | : 0.02 | loss_144.0925     | : 0.01 |
| loss_64.0425      | : 0.02 | fragment_452.3675 | : 0.01 |
| loss_70.5775      | : 0.02 | fragment_165.1475 | : 0.01 |
| fragment_110.5425 | : 0.02 | fragment_123.1175 | : 0.01 |
| fragment_451.3625 | : 0.02 | fragment_239.1675 | : 0.01 |
| fragment_278.1975 | : 0.02 | loss_170.1075     | : 0.01 |
| loss_158.1075     | : 0.02 | loss_46.0325      | : 0.01 |
| fragment_82.0125  | : 0.02 |                   |        |
| loss_99.1075      | : 0.02 |                   |        |
| loss_88.0525      | : 0.02 |                   |        |
| fragment_93.0725  | : 0.02 |                   |        |
| fragment_152.0825 | : 0.02 |                   |        |

rhabdus\_motif\_63.m2m

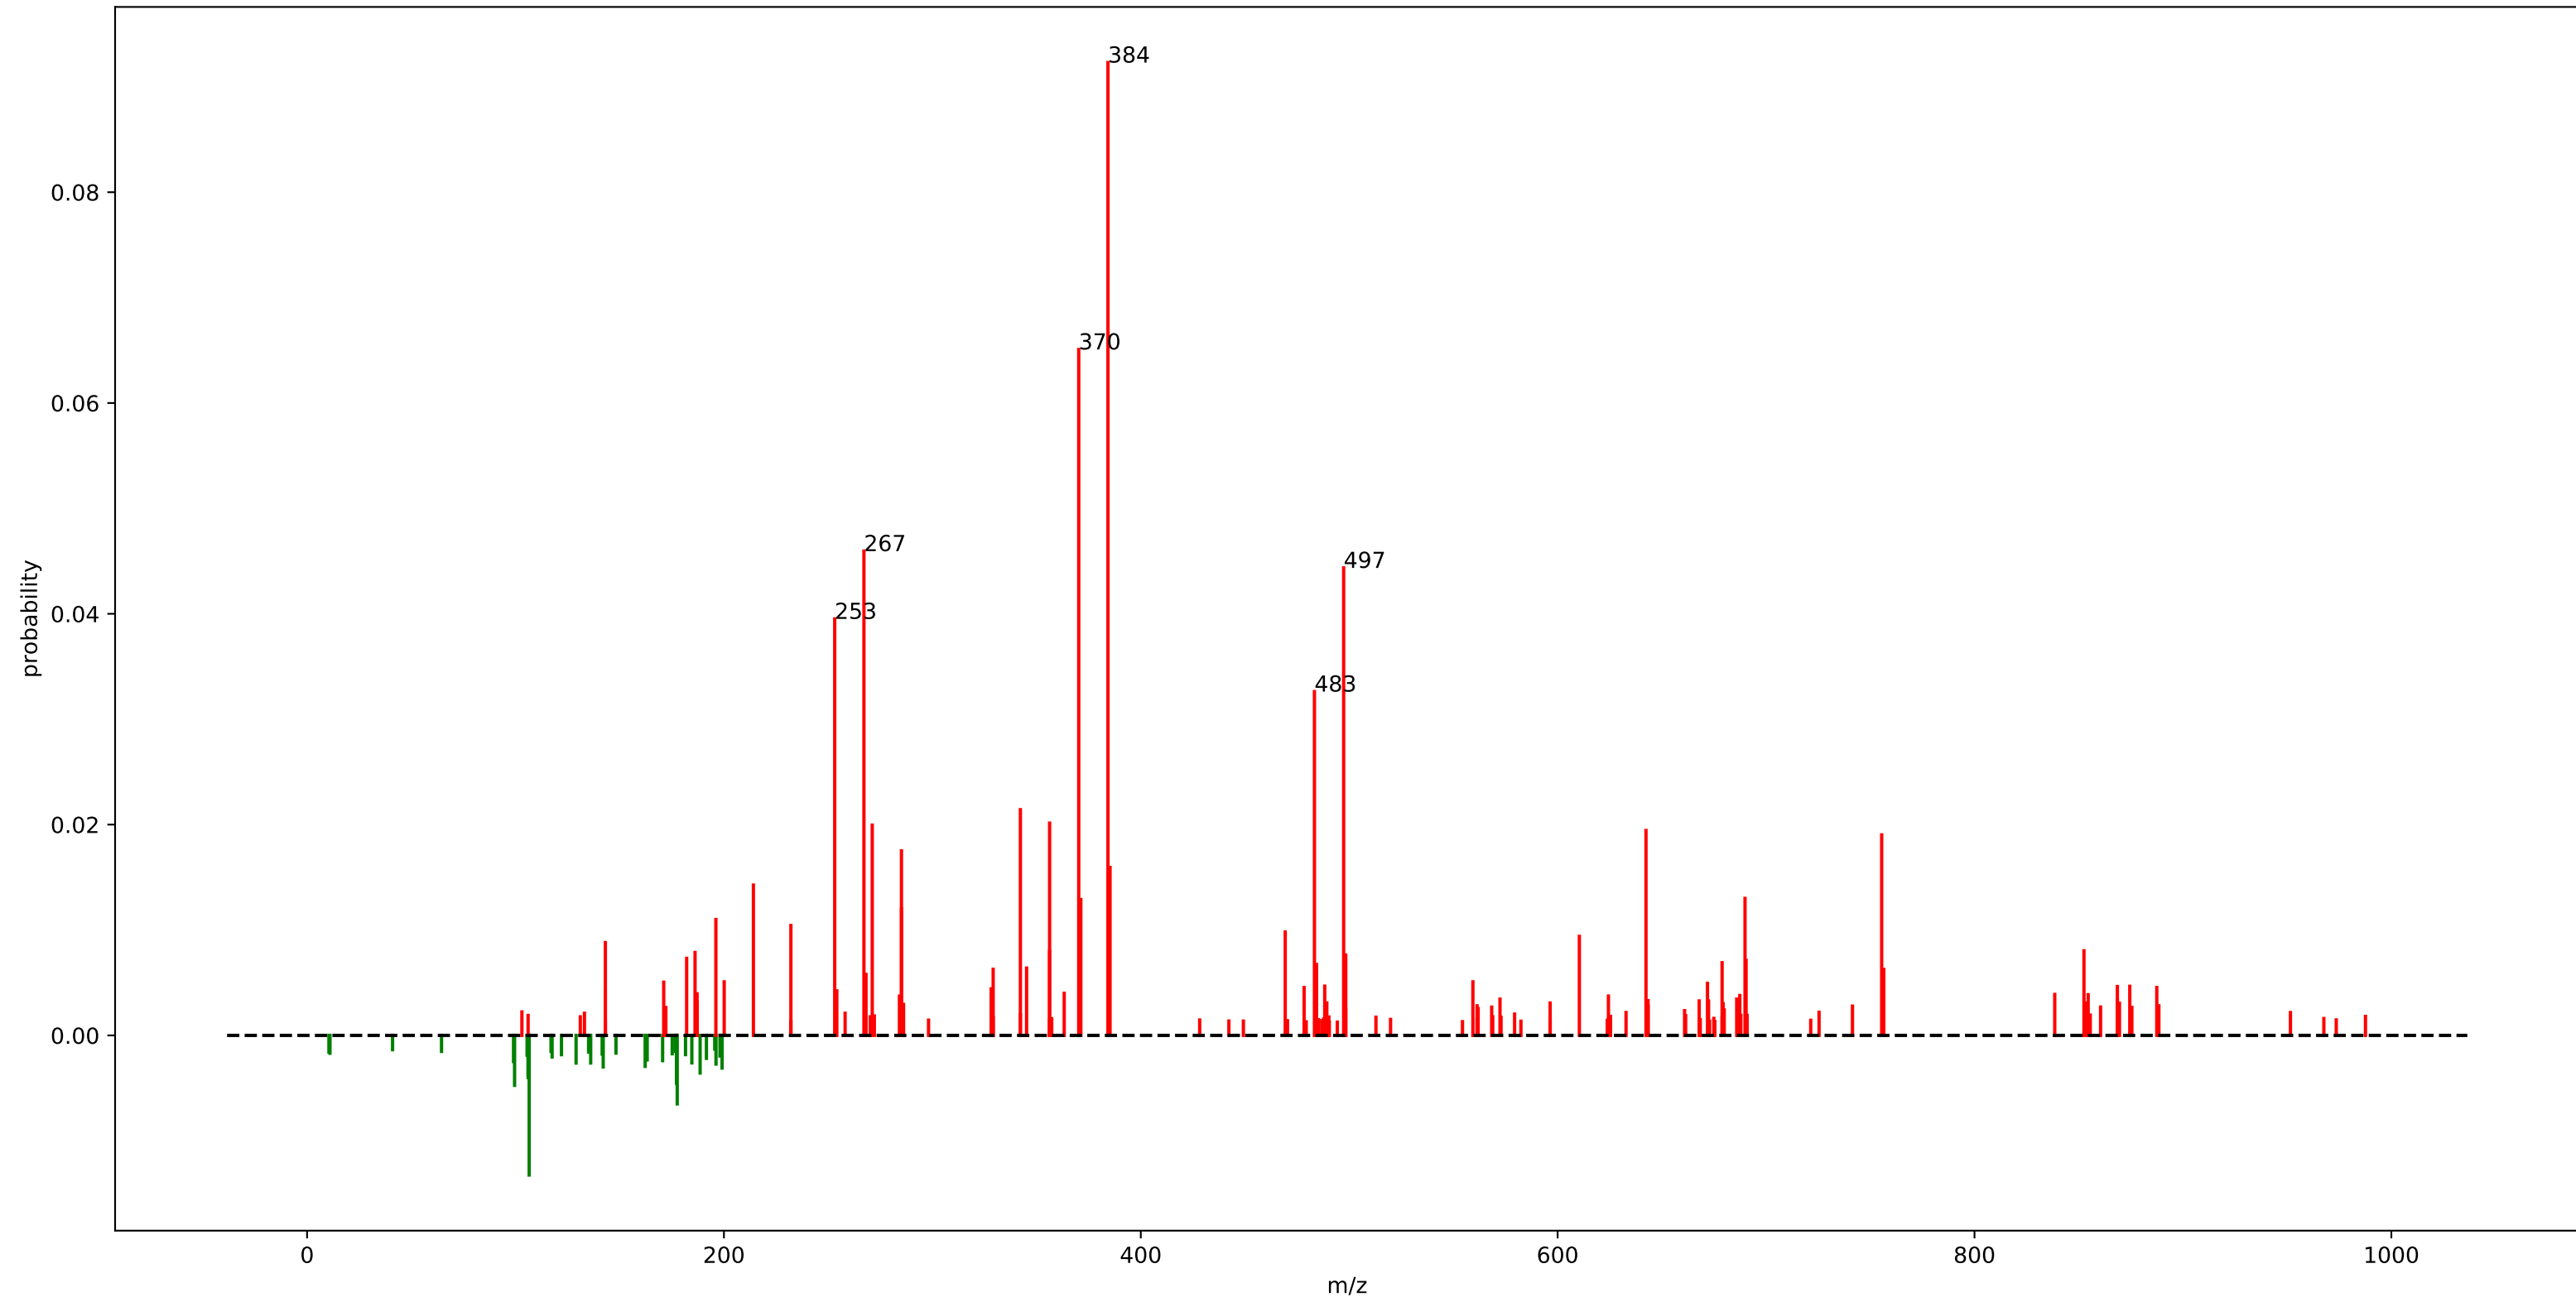

# rhabdus\_motif\_63.m2m

|                   |        |                   |        |
|-------------------|--------|-------------------|--------|
| fragment_384.2475 | : 0.09 | fragment_469.3025 | : 0.01 |
| fragment_370.2325 | : 0.07 | fragment_610.4175 | : 0.01 |
| fragment_267.1725 | : 0.05 | fragment_143.1125 | : 0.01 |
| fragment_497.3325 | : 0.04 | fragment_852.5175 | : 0.01 |
| fragment_253.1525 | : 0.04 | fragment_356.2175 | : 0.01 |
| fragment_483.3175 | : 0.03 | fragment_186.1475 | : 0.01 |
| fragment_342.2375 | : 0.02 | fragment_498.3375 | : 0.01 |
| fragment_356.2525 | : 0.02 | fragment_182.1175 | : 0.01 |
| fragment_271.1675 | : 0.02 | fragment_690.4025 | : 0.01 |
| fragment_642.3825 | : 0.02 | fragment_678.9075 | : 0.01 |
| fragment_755.4675 | : 0.02 | fragment_484.3225 | : 0.01 |
| fragment_285.1775 | : 0.02 | loss_177.5925     | : 0.01 |
| fragment_385.2525 | : 0.02 | fragment_345.2125 | : 0.01 |
| fragment_214.1425 | : 0.01 | fragment_329.1825 | : 0.01 |
| loss_106.5675     | : 0.01 | fragment_756.4675 | : 0.01 |
| fragment_689.9025 | : 0.01 | fragment_268.1725 | : 0.01 |
| fragment_371.2375 | : 0.01 | fragment_200.1275 | : 0.01 |
| fragment_285.1825 | : 0.01 | fragment_559.3425 | : 0.01 |
| fragment_196.1325 | : 0.01 | fragment_171.1125 | : 0.01 |
| fragment_232.1275 | : 0.01 |                   |        |



euphorbia\_motif\_360.m2m

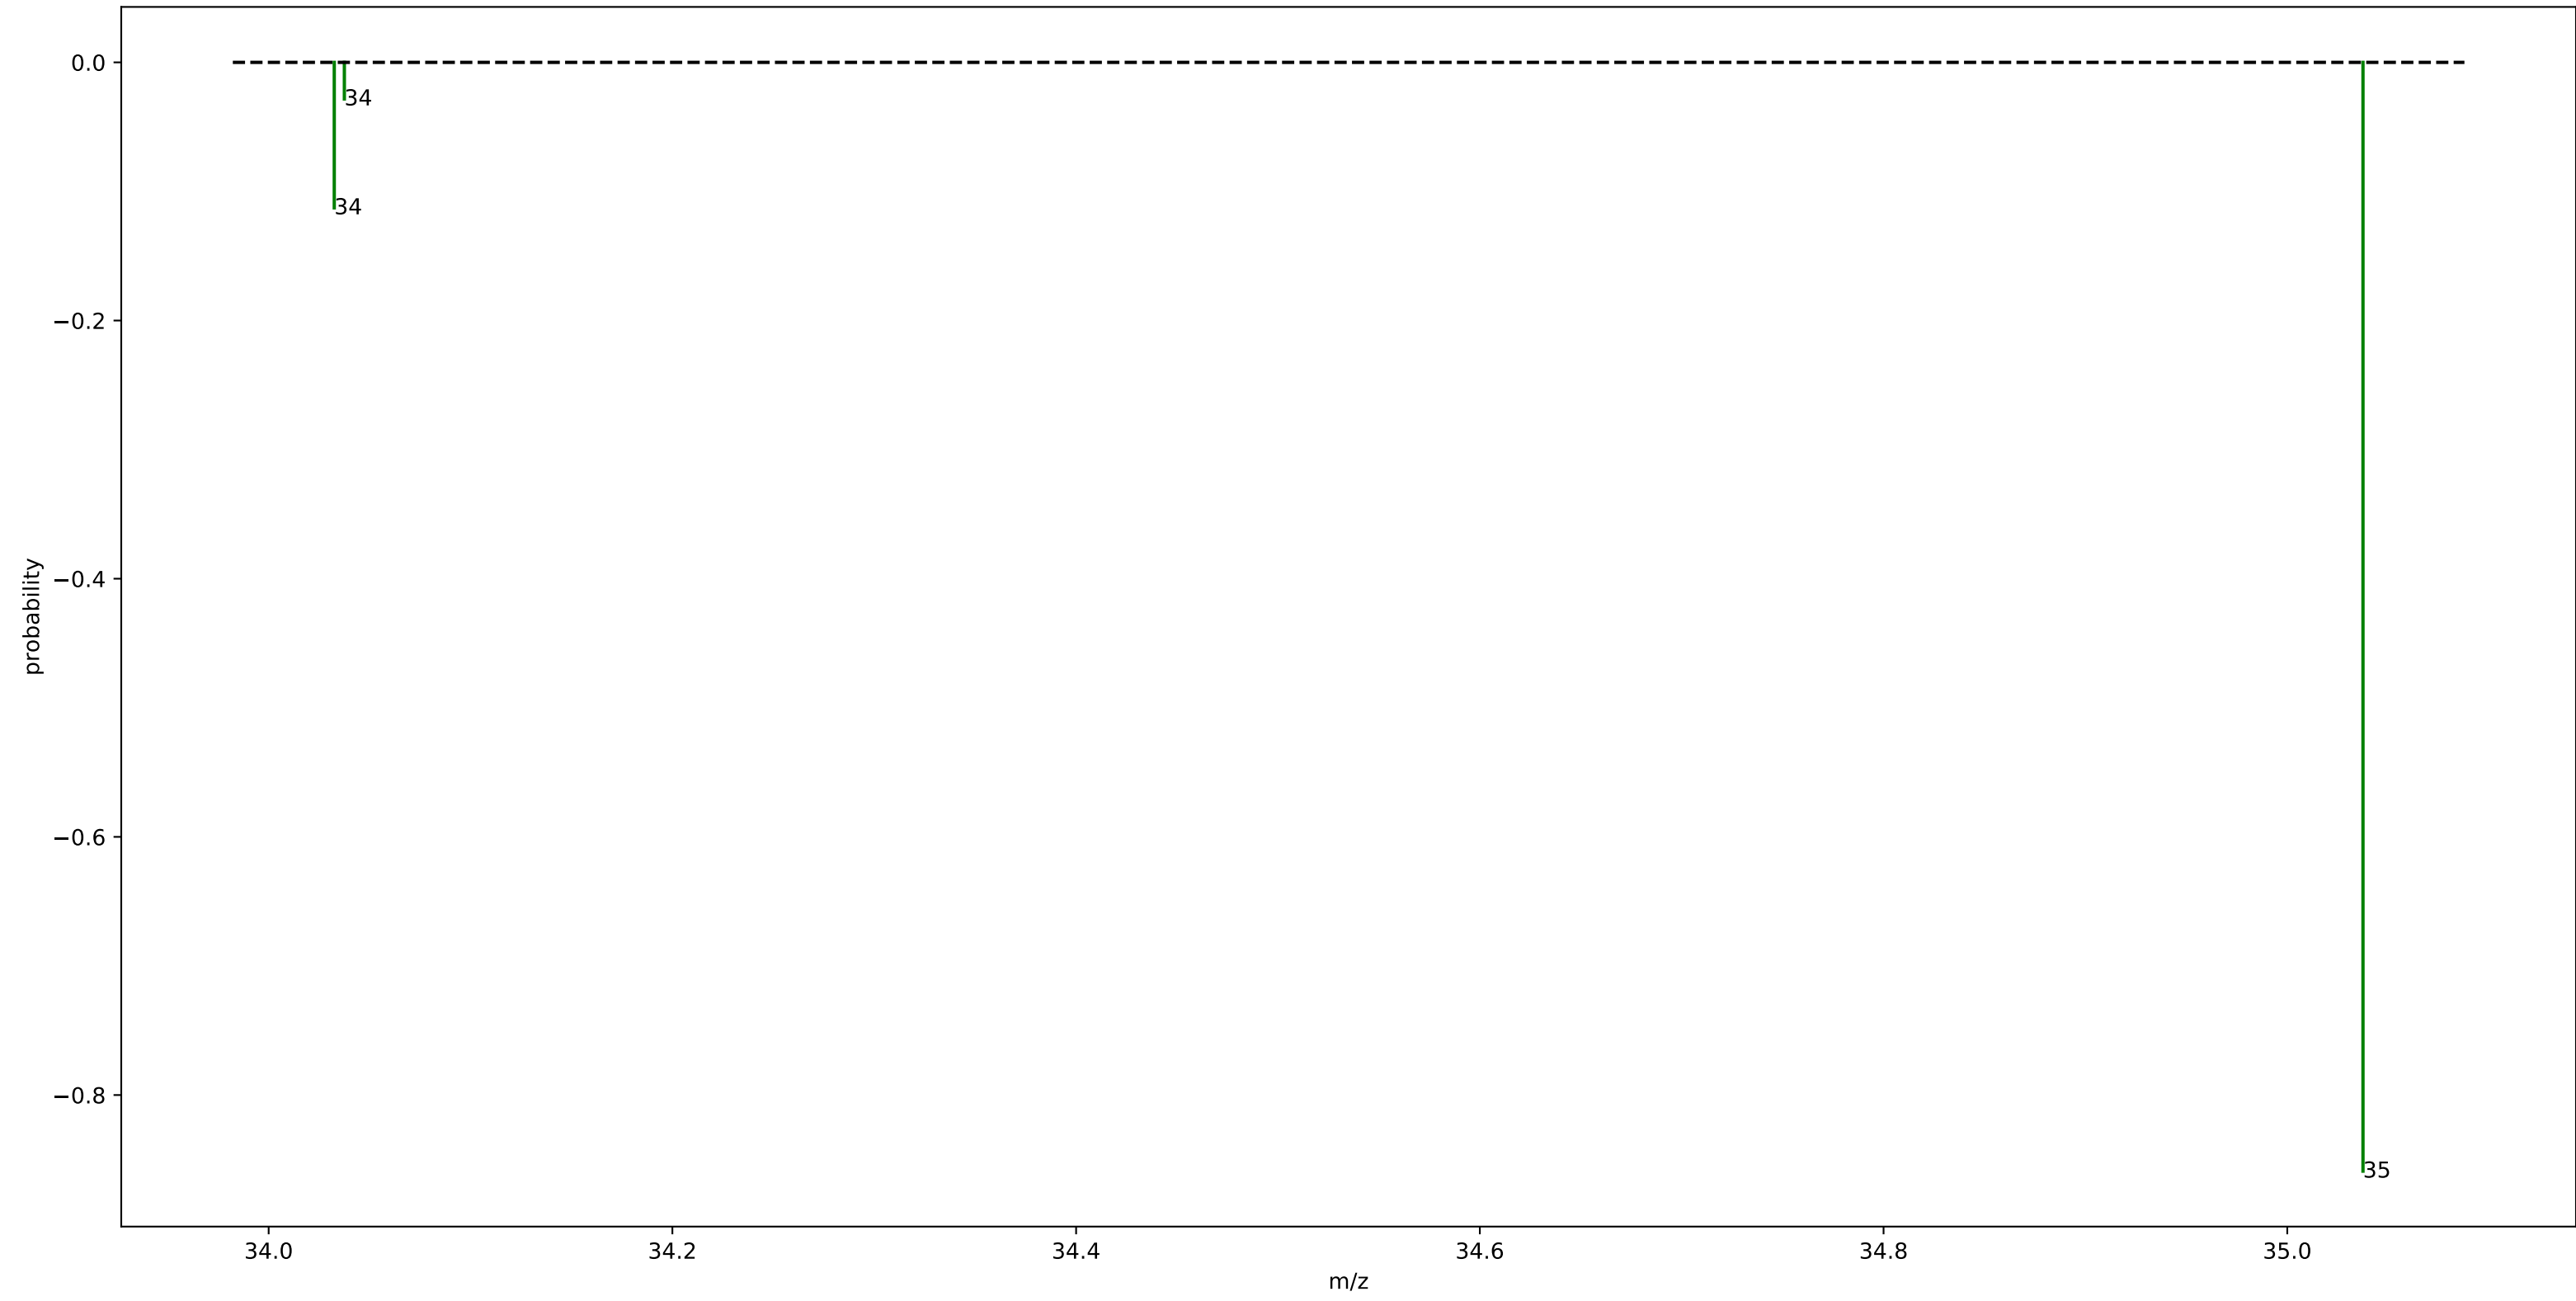

# euphorbia\_motif\_360.m2m

|              |        |
|--------------|--------|
| loss_35.0375 | : 0.86 |
| loss_34.0325 | : 0.11 |
| loss_34.0375 | : 0.03 |

mb\_motif\_43.m2m

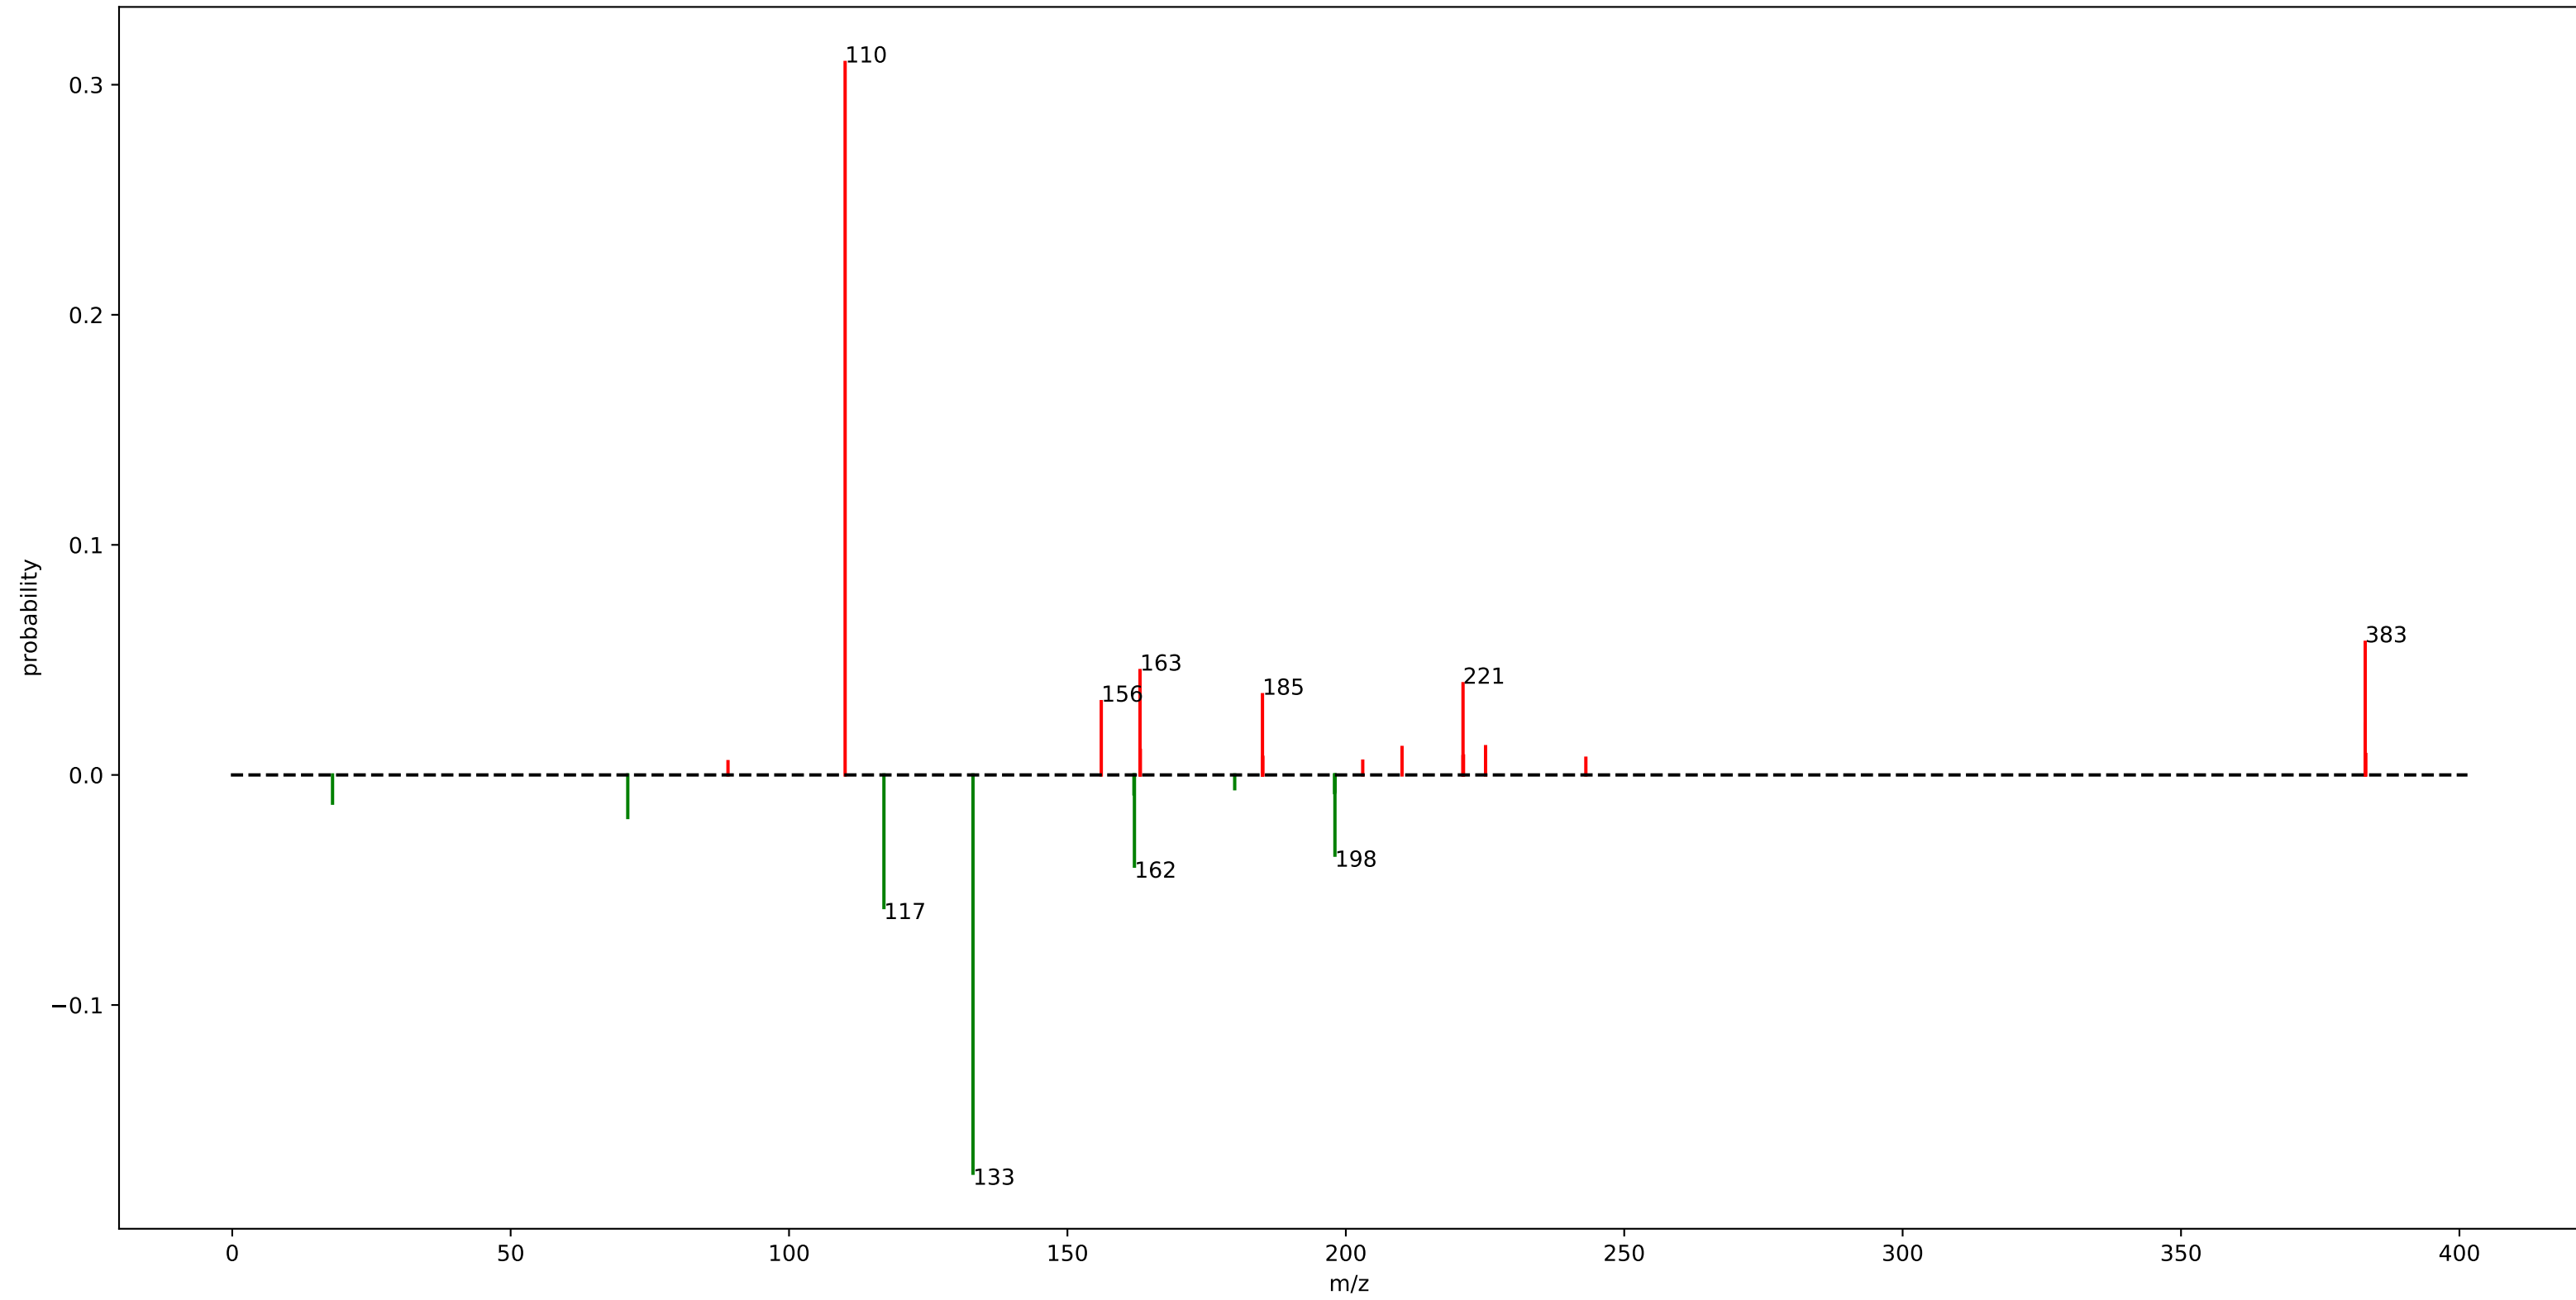

# mb\_motif\_43.m2m

|                   |        |                   |        |
|-------------------|--------|-------------------|--------|
| fragment_110.0725 | : 0.31 | fragment_185.0975 | : 0.01 |
| loss_133.0375     | : 0.17 | loss_197.9775     | : 0.01 |
| loss_117.0425     | : 0.06 | fragment_243.1075 | : 0.01 |
| fragment_383.0825 | : 0.06 | fragment_185.0225 | : 0.01 |
| fragment_163.0375 | : 0.05 | loss_198.0525     | : 0.01 |
| fragment_221.0475 | : 0.04 | fragment_203.0375 | : 0.01 |
| loss_162.0325     | : 0.04 | loss_180.0425     | : 0.01 |
| loss_198.0425     | : 0.03 | fragment_89.0375  | : 0.01 |
| fragment_185.0275 | : 0.03 |                   |        |
| fragment_156.0775 | : 0.03 |                   |        |
| fragment_383.0775 | : 0.02 |                   |        |
| loss_71.0375      | : 0.02 |                   |        |
| fragment_225.0975 | : 0.01 |                   |        |
| loss_18.0125      | : 0.01 |                   |        |
| fragment_210.0925 | : 0.01 |                   |        |
| fragment_163.0975 | : 0.01 |                   |        |
| fragment_383.1875 | : 0.01 |                   |        |
| fragment_221.1325 | : 0.01 |                   |        |
| loss_161.9475     | : 0.01 |                   |        |
| fragment_221.0425 | : 0.01 |                   |        |

mb\_motif\_16.m2m

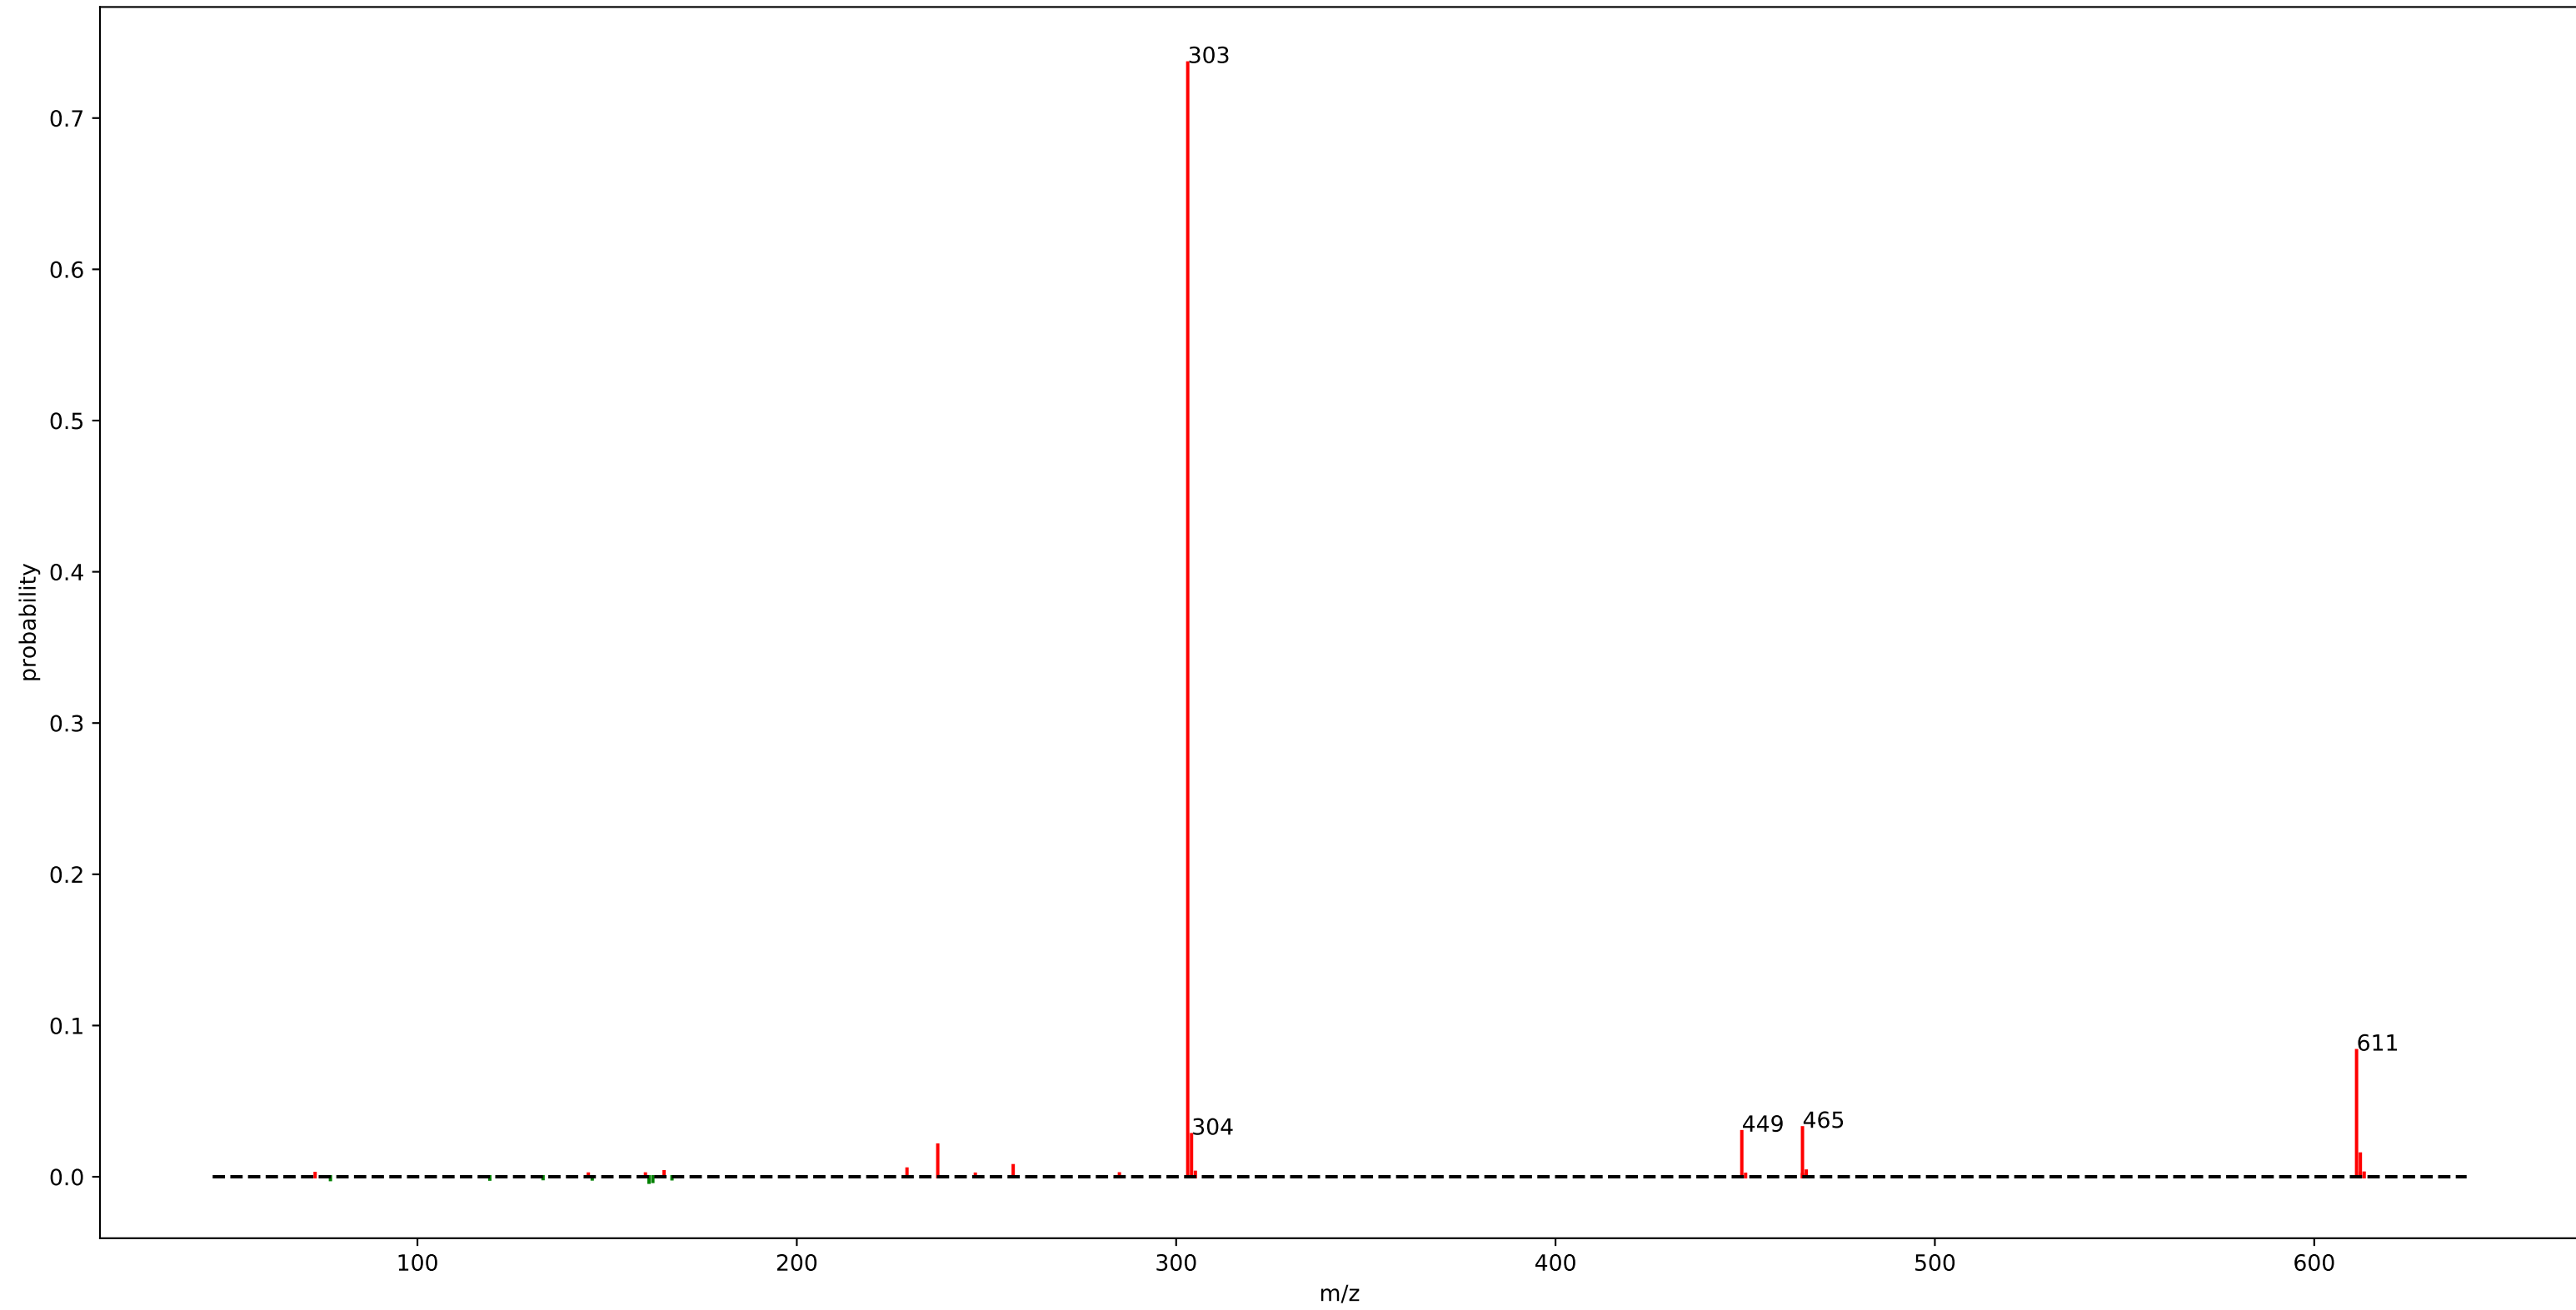

## mb\_motif\_16.m2m

|                   |        |
|-------------------|--------|
| fragment_303.0525 | : 0.74 |
| fragment_611.1625 | : 0.08 |
| fragment_465.1025 | : 0.03 |
| fragment_449.1075 | : 0.03 |
| fragment_304.0525 | : 0.03 |
| fragment_237.1575 | : 0.02 |
| fragment_612.1625 | : 0.02 |
| fragment_257.0425 | : 0.01 |
| fragment_229.0475 | : 0.01 |

euphorbia\_motif\_158.m2m

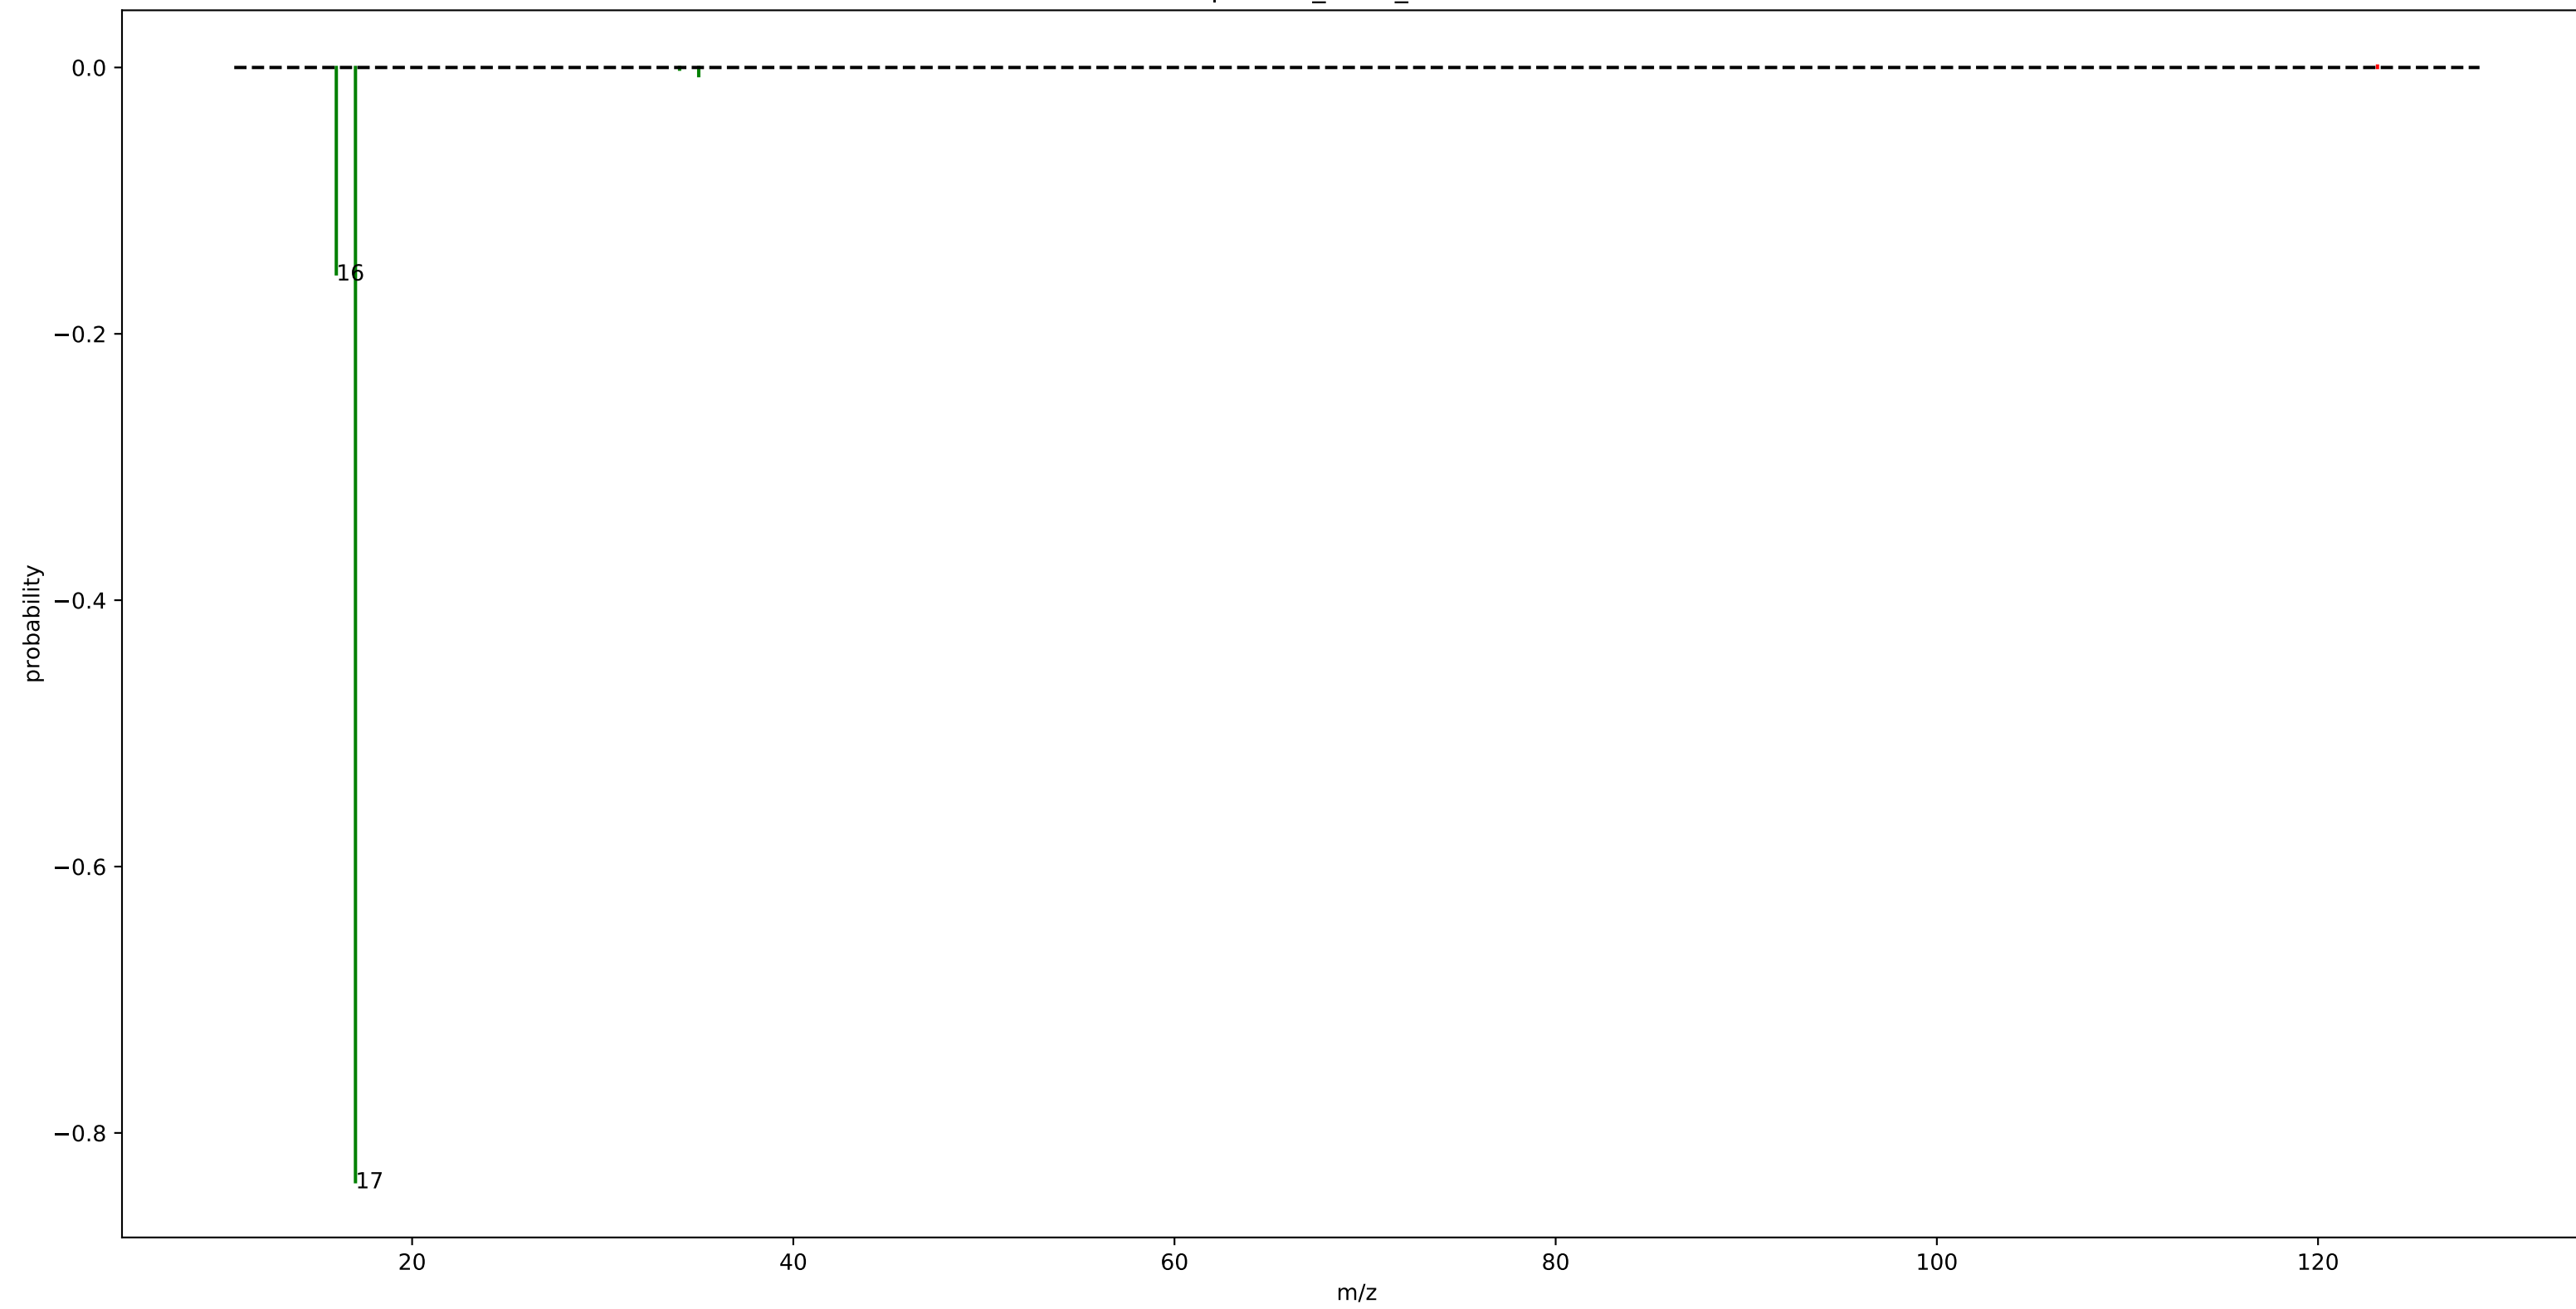

# euphorbia\_motif\_158.m2m

|              |        |
|--------------|--------|
| loss_17.0275 | : 0.84 |
| loss_16.0225 | : 0.15 |
| loss_35.0375 | : 0.01 |



gnps\_motif\_32.m2m

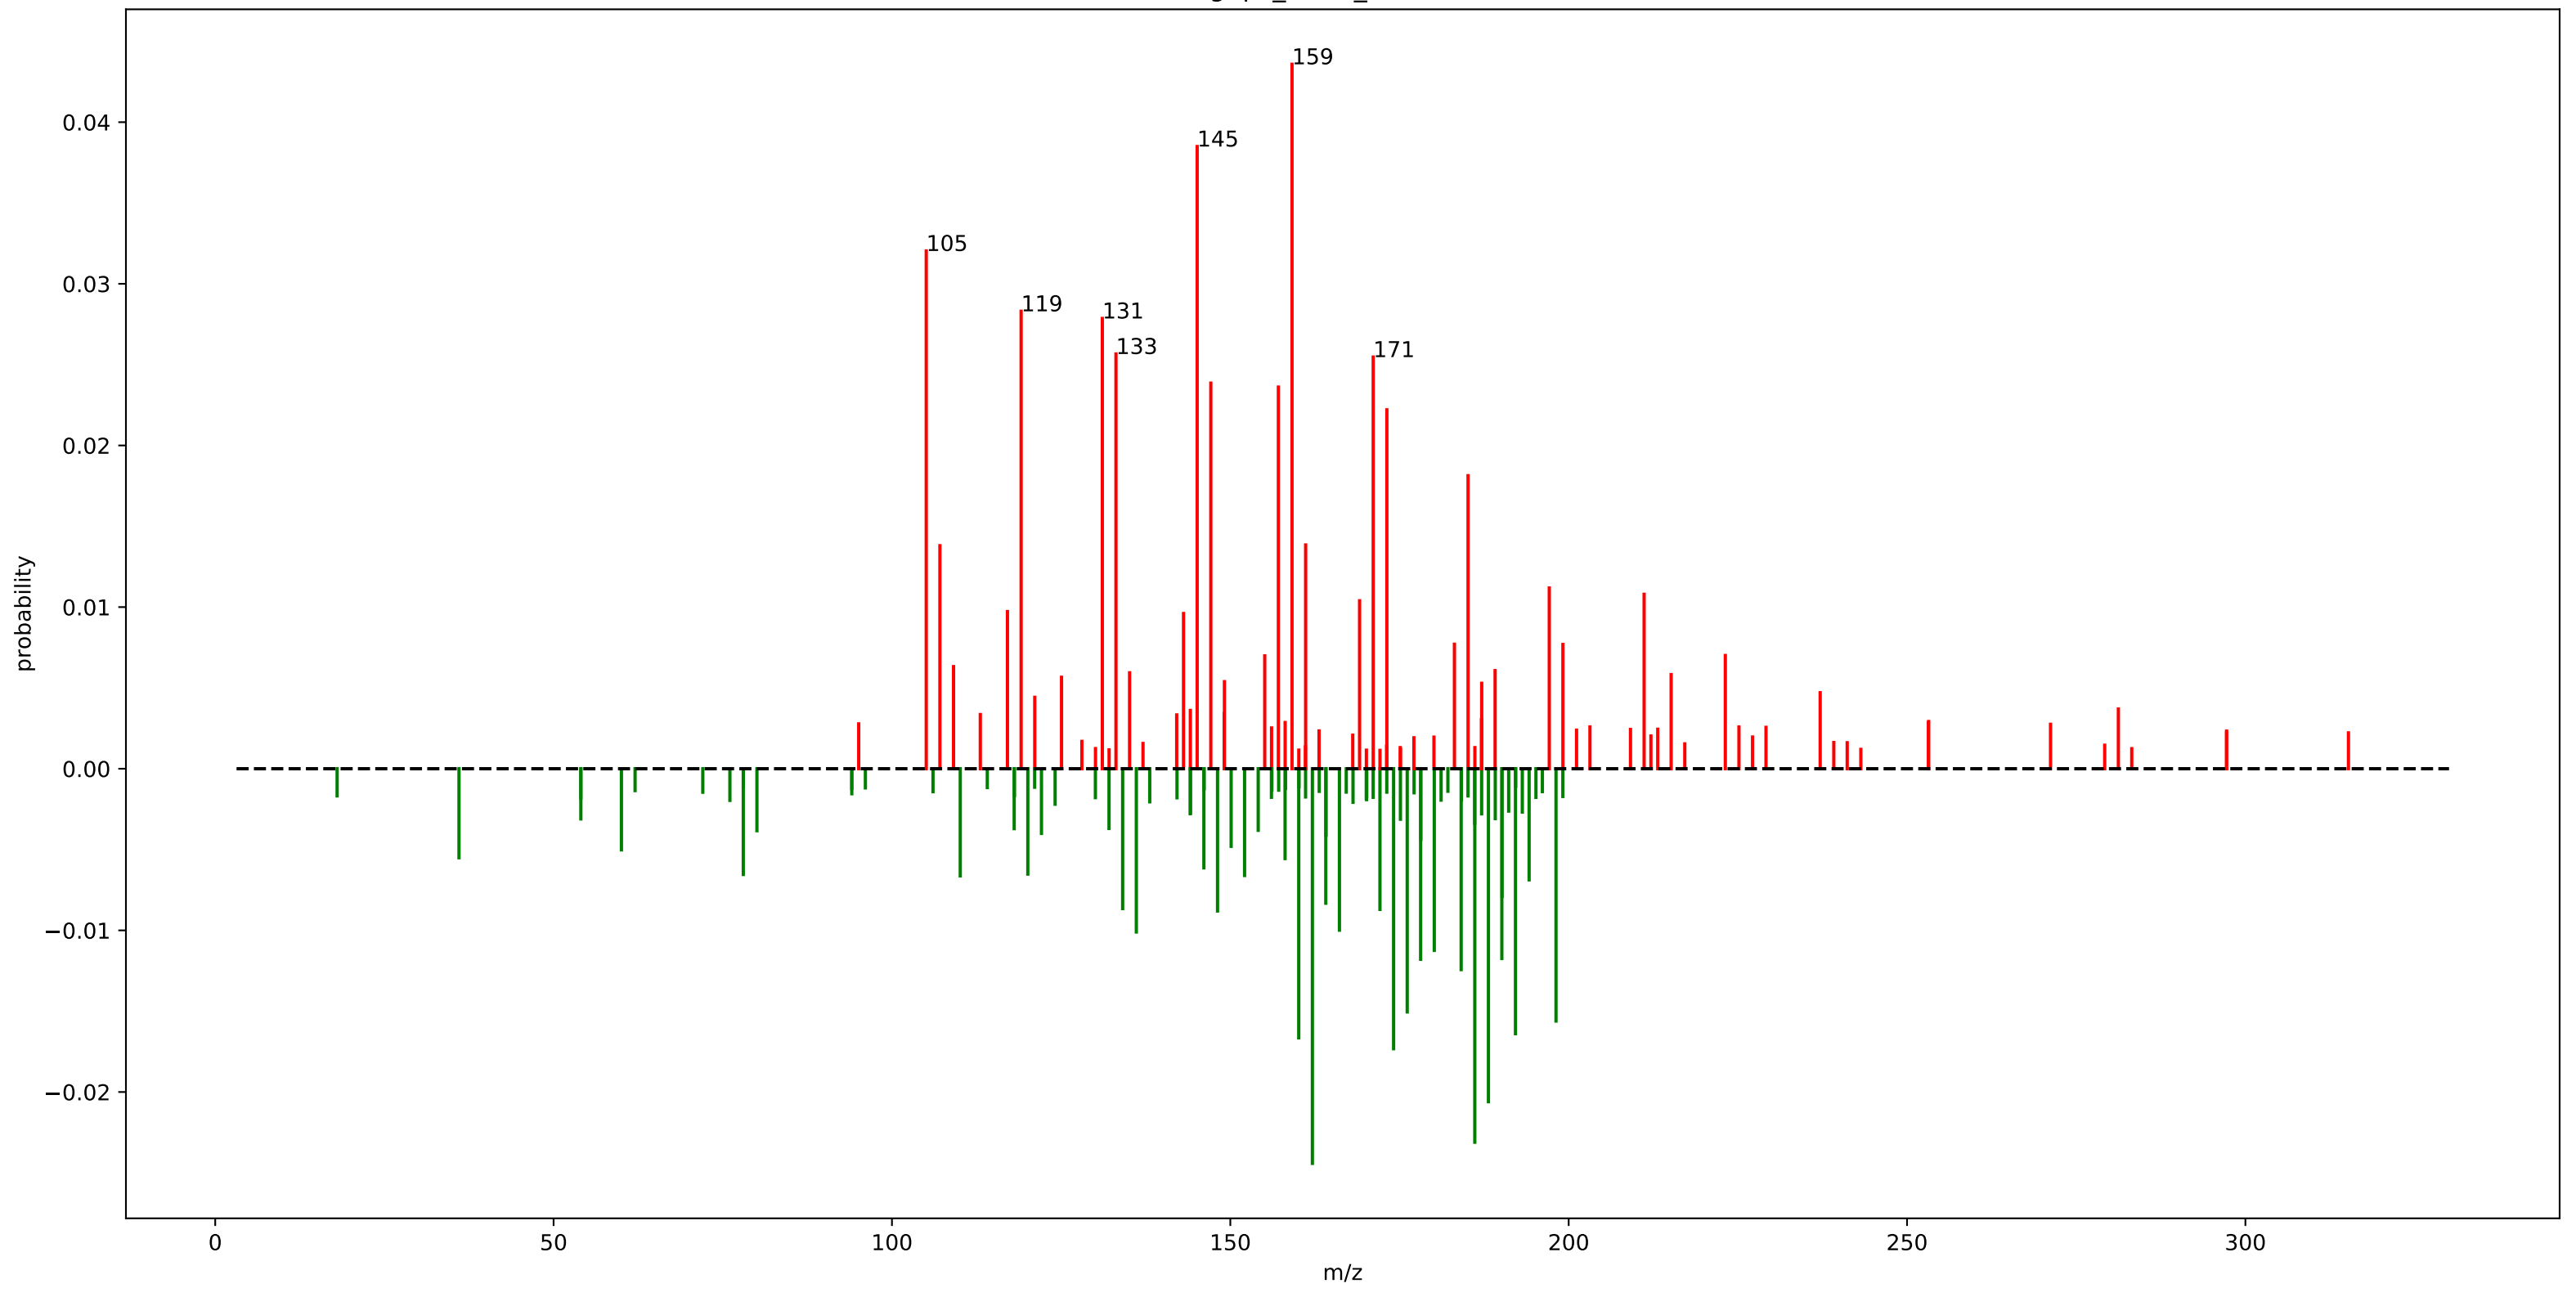

# gnps\_motif\_32.m2m

|                   |        |                   |        |                   |        |
|-------------------|--------|-------------------|--------|-------------------|--------|
| fragment_159.1175 | : 0.04 | fragment_107.0875 | : 0.01 | fragment_155.0875 | : 0.01 |
| fragment_145.1025 | : 0.04 | loss_184.1125     | : 0.01 | loss_194.1525     | : 0.01 |
| fragment_105.0675 | : 0.03 | loss_178.1225     | : 0.01 | loss_110.0925     | : 0.01 |
| fragment_119.0875 | : 0.03 | loss_190.1225     | : 0.01 | loss_152.1075     | : 0.01 |
| fragment_131.0875 | : 0.03 | loss_180.1375     | : 0.01 | loss_78.0325      | : 0.01 |
| fragment_133.1025 | : 0.03 | fragment_197.1325 | : 0.01 | loss_120.0775     | : 0.01 |
| fragment_171.1175 | : 0.03 | fragment_211.1475 | : 0.01 | fragment_109.1025 | : 0.01 |
| loss_162.1275     | : 0.02 | fragment_169.1025 | : 0.01 | loss_146.0925     | : 0.01 |
| fragment_147.1175 | : 0.02 | loss_136.1125     | : 0.01 | fragment_189.1275 | : 0.01 |
| fragment_157.1025 | : 0.02 | loss_166.1225     | : 0.01 | fragment_135.1175 | : 0.01 |
| loss_186.1275     | : 0.02 | fragment_117.0675 | : 0.01 | fragment_215.1425 | : 0.01 |
| fragment_173.1325 | : 0.02 | fragment_143.0875 | : 0.01 | fragment_125.0575 | : 0.01 |
| loss_188.1425     | : 0.02 | loss_148.1125     | : 0.01 | loss_158.0925     | : 0.01 |
| fragment_185.1325 | : 0.02 | loss_172.1125     | : 0.01 | loss_36.0225      | : 0.01 |
| loss_174.1275     | : 0.02 | loss_134.0925     | : 0.01 | fragment_149.1325 | : 0.01 |
| loss_160.1125     | : 0.02 | loss_164.1075     | : 0.01 | fragment_187.1475 | : 0.01 |
| loss_192.1375     | : 0.02 | loss_190.1575     | : 0.01 | loss_60.0225      | : 0.01 |
| loss_198.1275     | : 0.02 | fragment_183.1175 | : 0.01 |                   |        |
| loss_176.1425     | : 0.02 | fragment_199.1475 | : 0.01 |                   |        |
| fragment_161.1325 | : 0.01 | fragment_223.1475 | : 0.01 |                   |        |

rhamn\_motif\_167.m2m

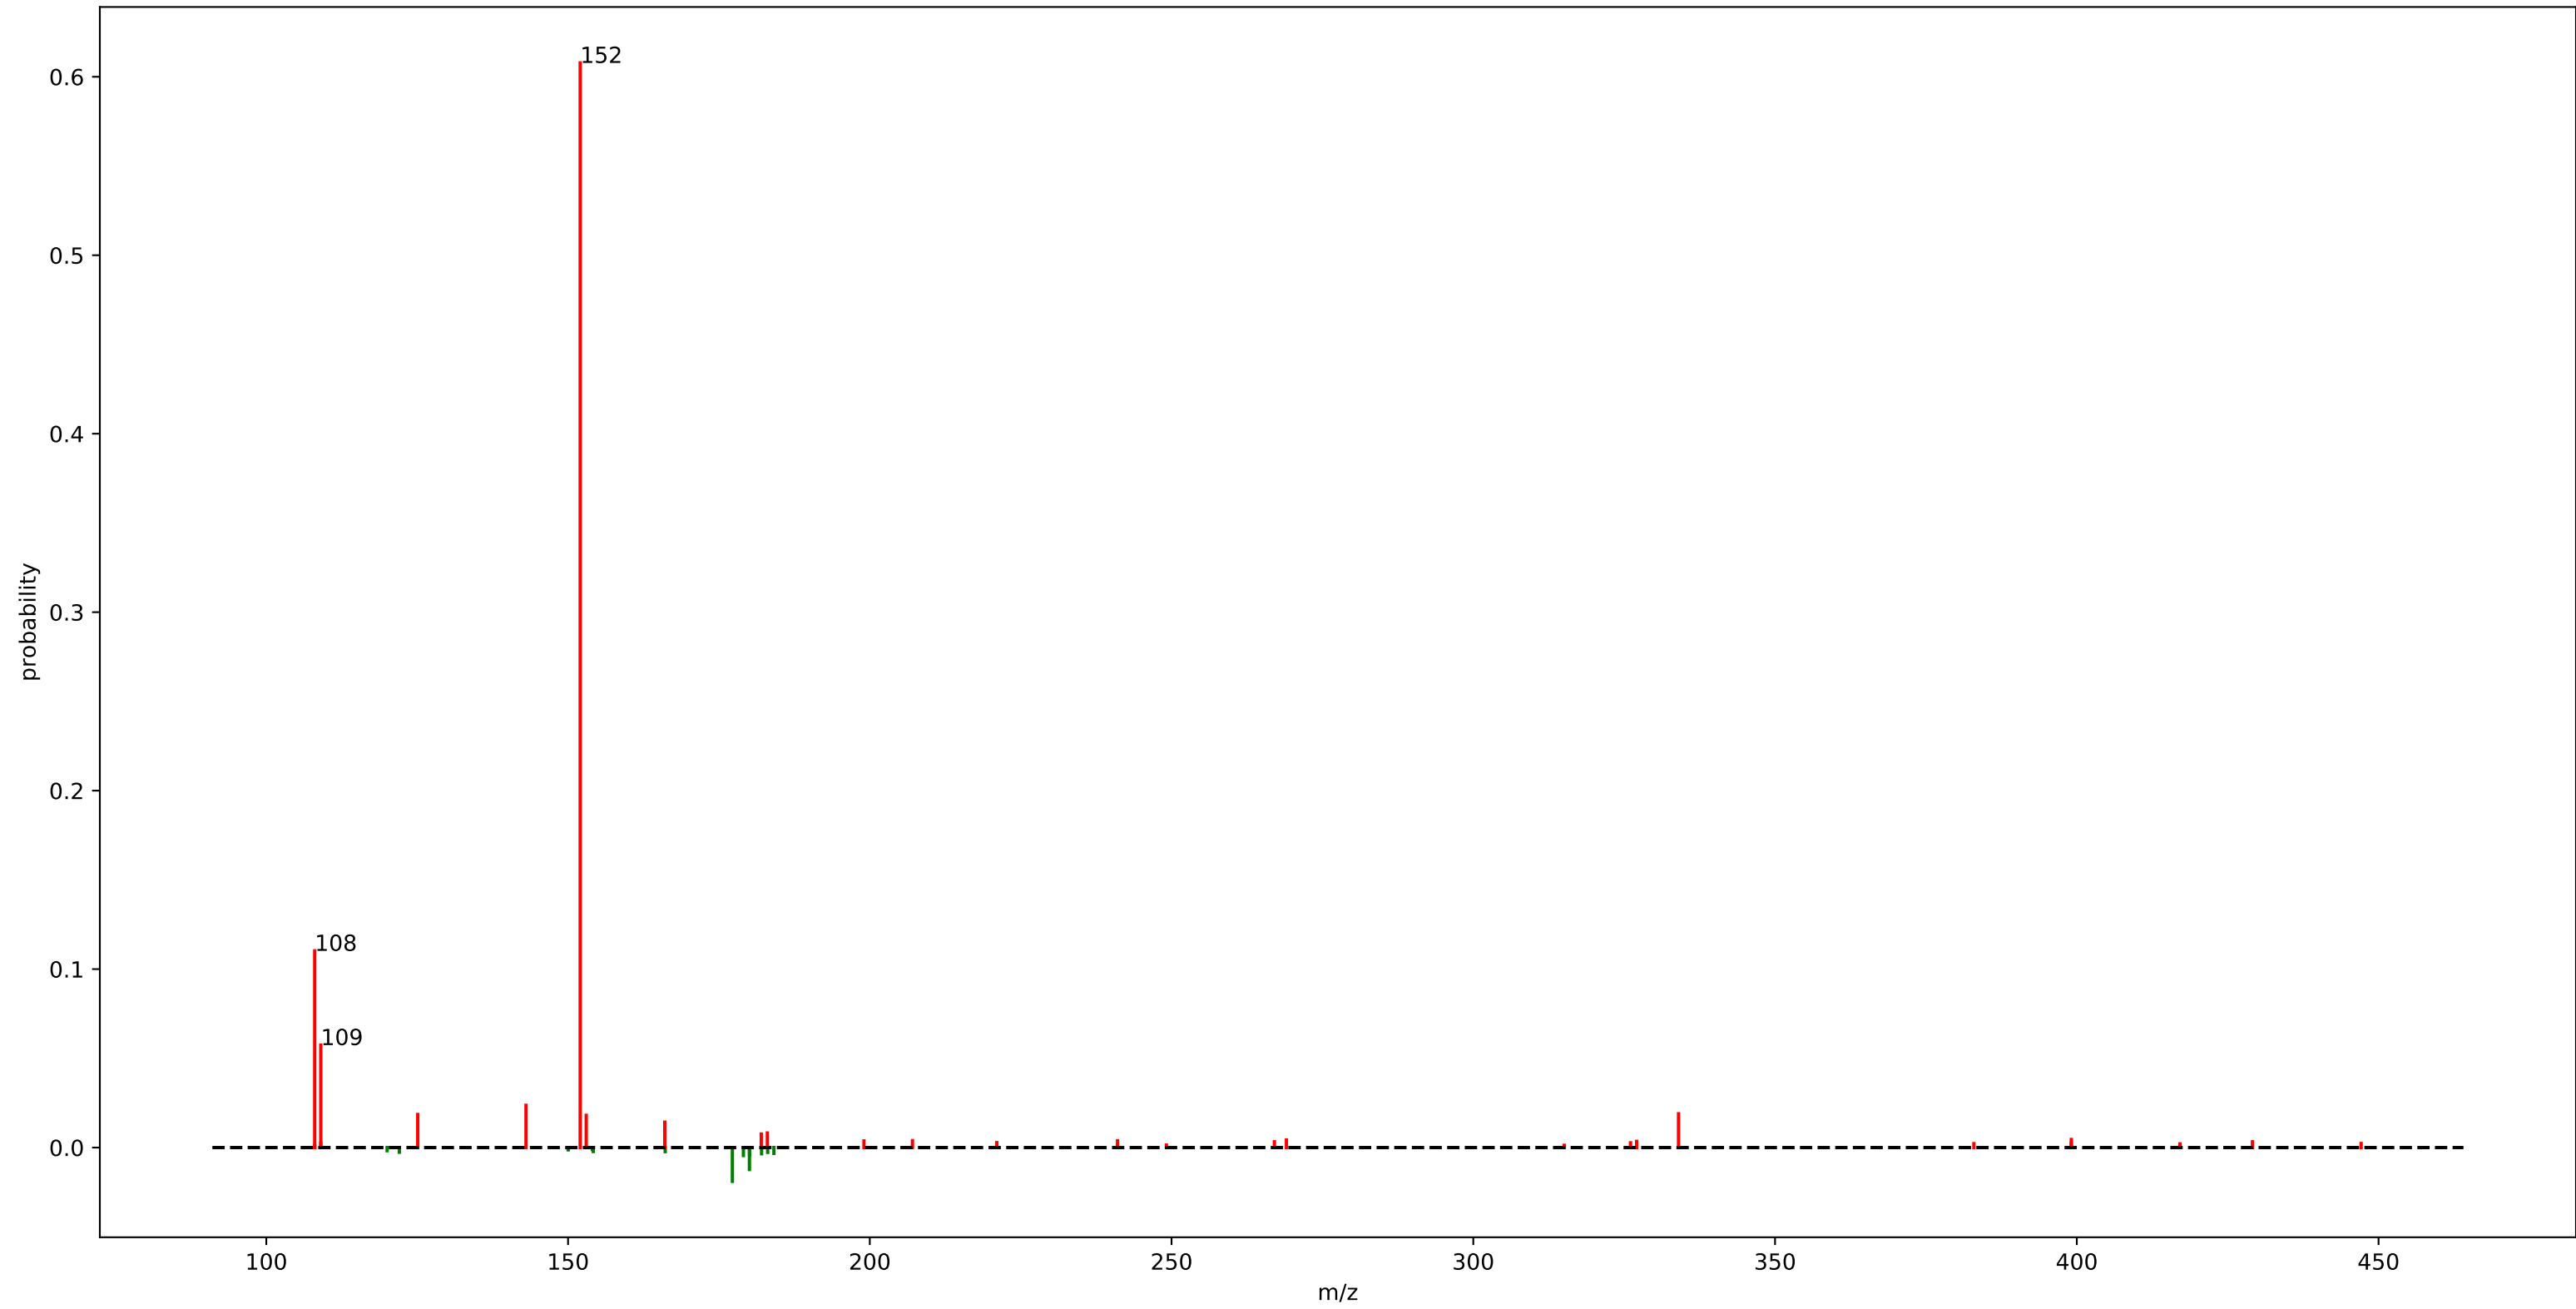

## rhamn\_motif\_167.m2m

|                   |        |
|-------------------|--------|
| fragment_152.0125 | : 0.61 |
| fragment_108.0225 | : 0.11 |
| fragment_109.0275 | : 0.06 |
| fragment_143.0375 | : 0.02 |
| fragment_334.0075 | : 0.02 |
| loss_177.2275     | : 0.02 |
| fragment_125.0975 | : 0.02 |
| fragment_153.0125 | : 0.02 |
| fragment_166.0275 | : 0.01 |
| loss_180.0575     | : 0.01 |
| fragment_183.0275 | : 0.01 |
| fragment_182.0175 | : 0.01 |

motif\_530

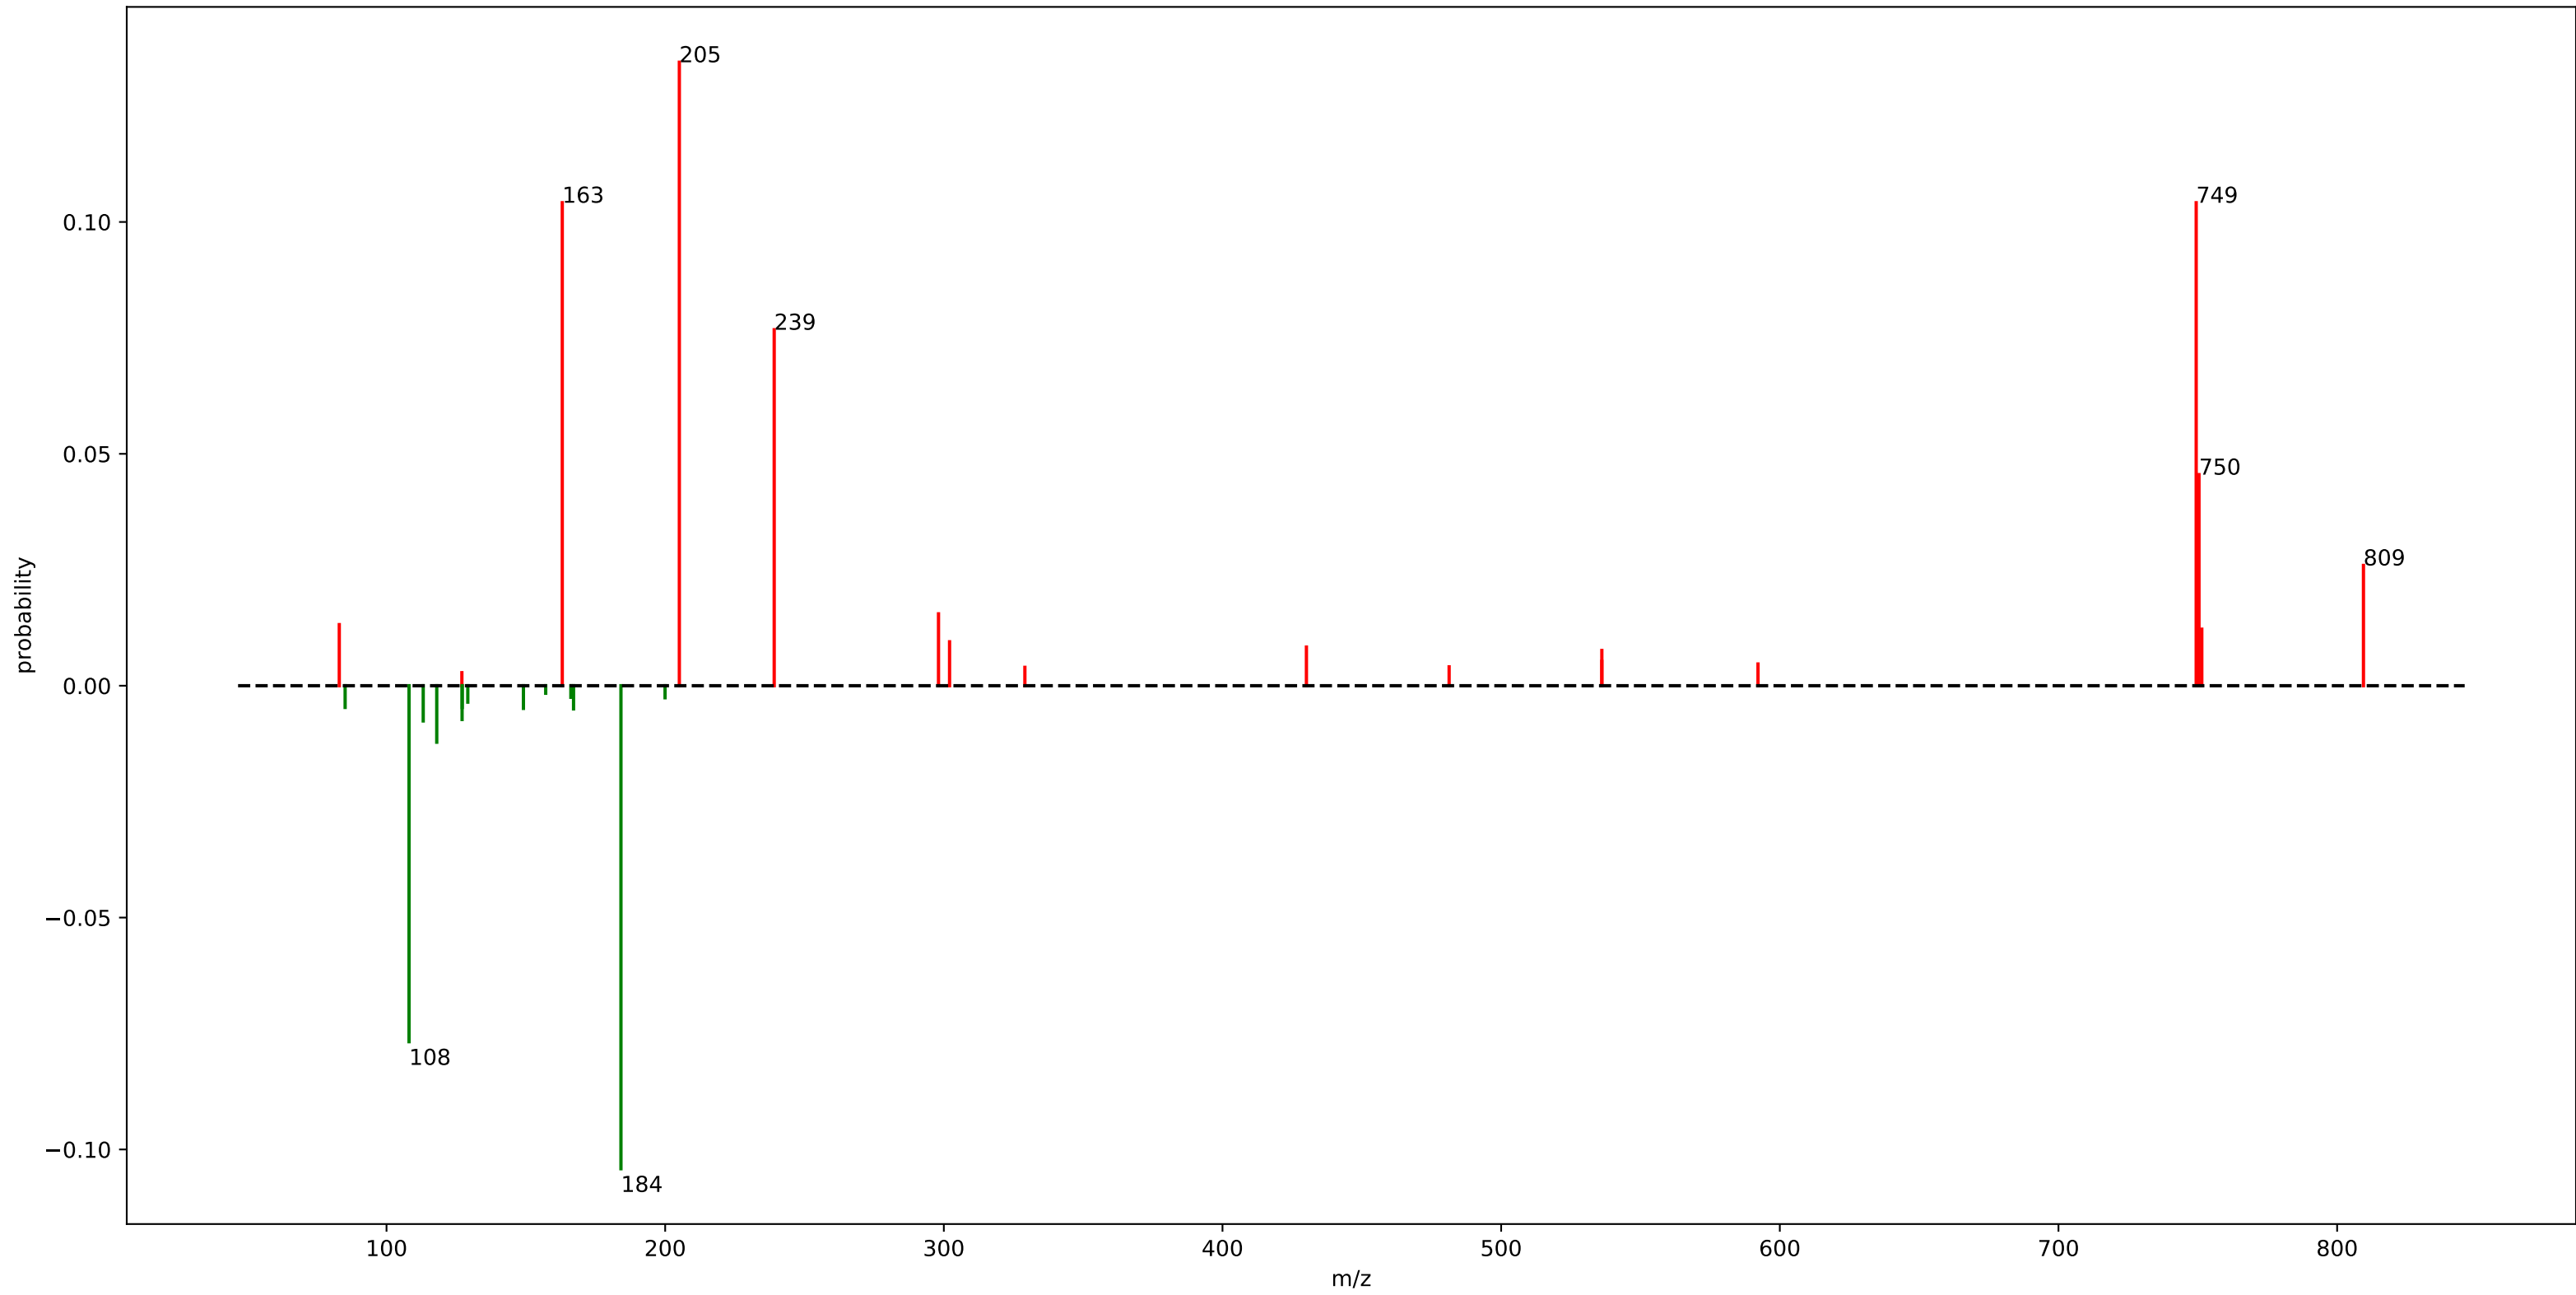

## motif\_530

|                   |        |
|-------------------|--------|
| fragment_205.0825 | : 0.13 |
| fragment_163.0725 | : 0.10 |
| loss_184.1275     | : 0.10 |
| fragment_749.4225 | : 0.10 |
| fragment_239.1225 | : 0.08 |
| loss_108.0775     | : 0.08 |
| fragment_750.4275 | : 0.05 |
| fragment_809.4475 | : 0.03 |
| fragment_298.0875 | : 0.02 |
| fragment_83.0475  | : 0.01 |
| fragment_751.4325 | : 0.01 |
| loss_118.0275     | : 0.01 |
| fragment_302.0525 | : 0.01 |
| fragment_430.1175 | : 0.01 |
| loss_113.1725     | : 0.01 |
| fragment_536.1325 | : 0.01 |
| loss_127.1175     | : 0.01 |
| fragment_536.1275 | : 0.01 |

euphorbia\_motif\_432.m2m

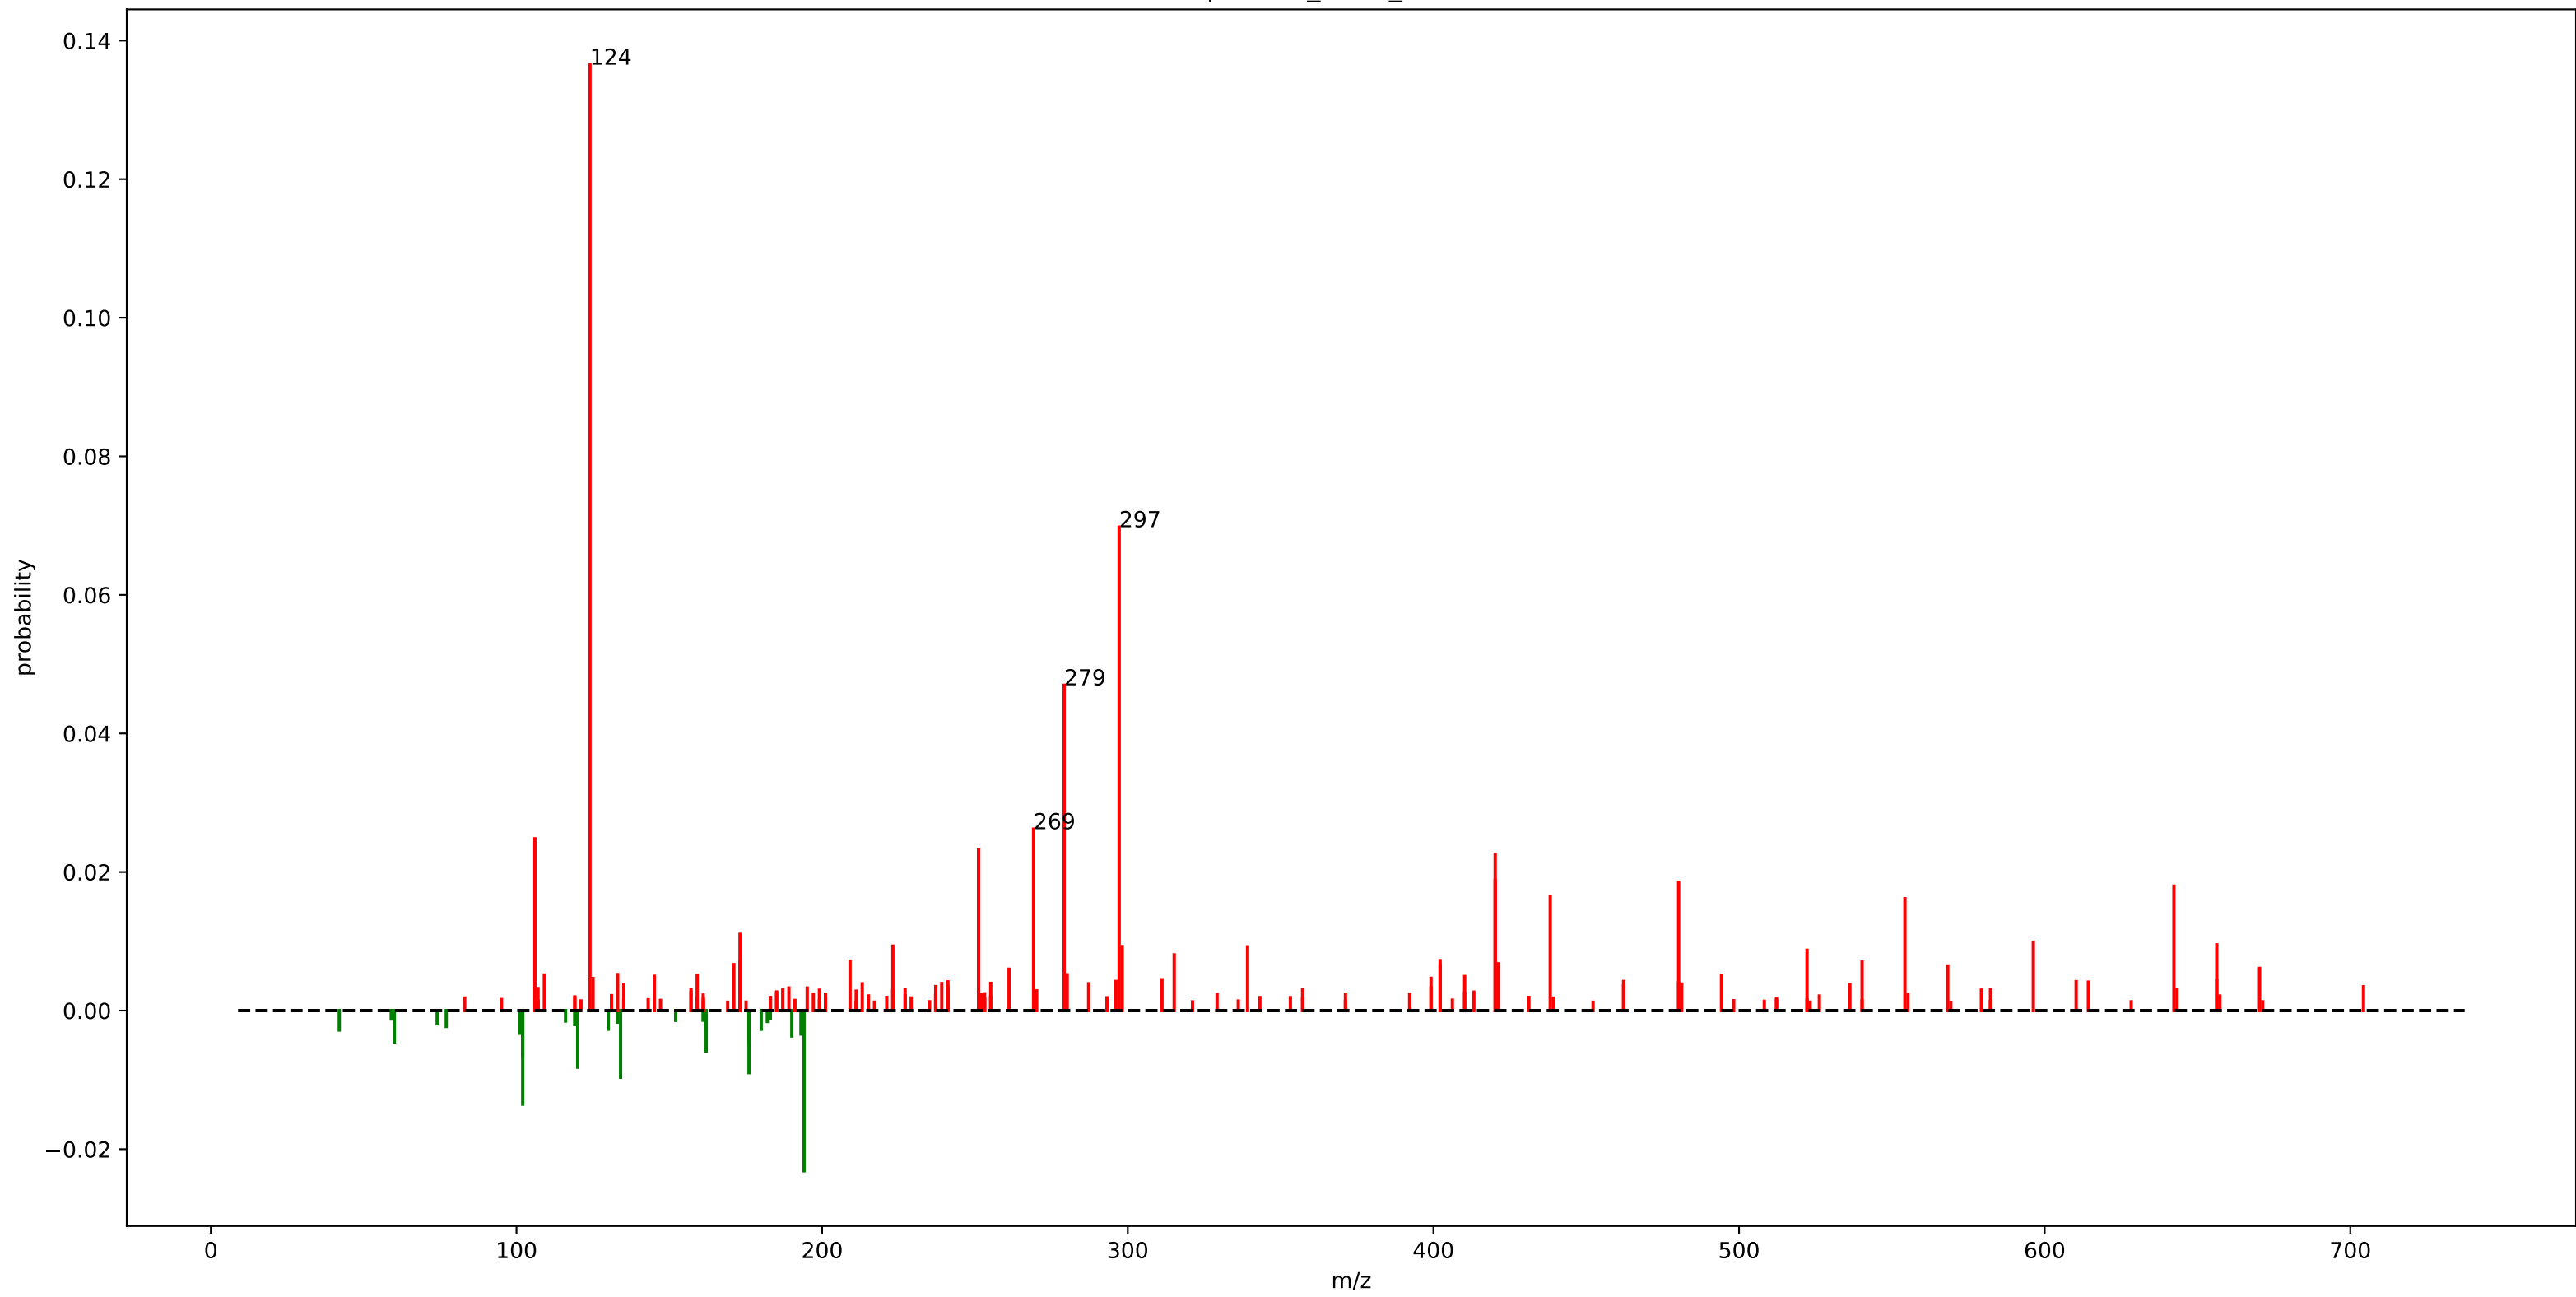

# euphorbia\_motif\_432.m2m

|                   |        |                   |        |                   |        |
|-------------------|--------|-------------------|--------|-------------------|--------|
| fragment_124.0375 | : 0.14 | fragment_339.1925 | : 0.01 | fragment_494.2525 | : 0.01 |
| fragment_297.1825 | : 0.07 | loss_176.0725     | : 0.01 | fragment_159.1175 | : 0.01 |
| fragment_279.1725 | : 0.05 | fragment_522.2475 | : 0.01 |                   |        |
| fragment_269.1875 | : 0.03 | loss_120.0425     | : 0.01 |                   |        |
| fragment_106.0275 | : 0.02 | fragment_315.1925 | : 0.01 |                   |        |
| fragment_251.1775 | : 0.02 | fragment_402.2075 | : 0.01 |                   |        |
| loss_194.0825     | : 0.02 | fragment_209.1325 | : 0.01 |                   |        |
| fragment_420.2125 | : 0.02 | fragment_173.0975 | : 0.01 |                   |        |
| fragment_420.2175 | : 0.02 | fragment_540.2575 | : 0.01 |                   |        |
| fragment_480.2375 | : 0.02 | fragment_421.2175 | : 0.01 |                   |        |
| fragment_642.2875 | : 0.02 | fragment_171.1175 | : 0.01 |                   |        |
| fragment_438.2275 | : 0.02 | fragment_402.2025 | : 0.01 |                   |        |
| fragment_554.2725 | : 0.02 | loss_102.0325     | : 0.01 |                   |        |
| loss_102.0375     | : 0.01 | fragment_568.2875 | : 0.01 |                   |        |
| fragment_173.1325 | : 0.01 | fragment_670.3175 | : 0.01 |                   |        |
| fragment_596.2825 | : 0.01 | fragment_261.1625 | : 0.01 |                   |        |
| loss_134.0625     | : 0.01 | loss_162.0575     | : 0.01 |                   |        |
| fragment_656.3025 | : 0.01 | fragment_133.1025 | : 0.01 |                   |        |
| fragment_223.1475 | : 0.01 | fragment_280.1775 | : 0.01 |                   |        |
| fragment_298.1875 | : 0.01 | fragment_109.1025 | : 0.01 |                   |        |



gnps\_motif\_64.m2m

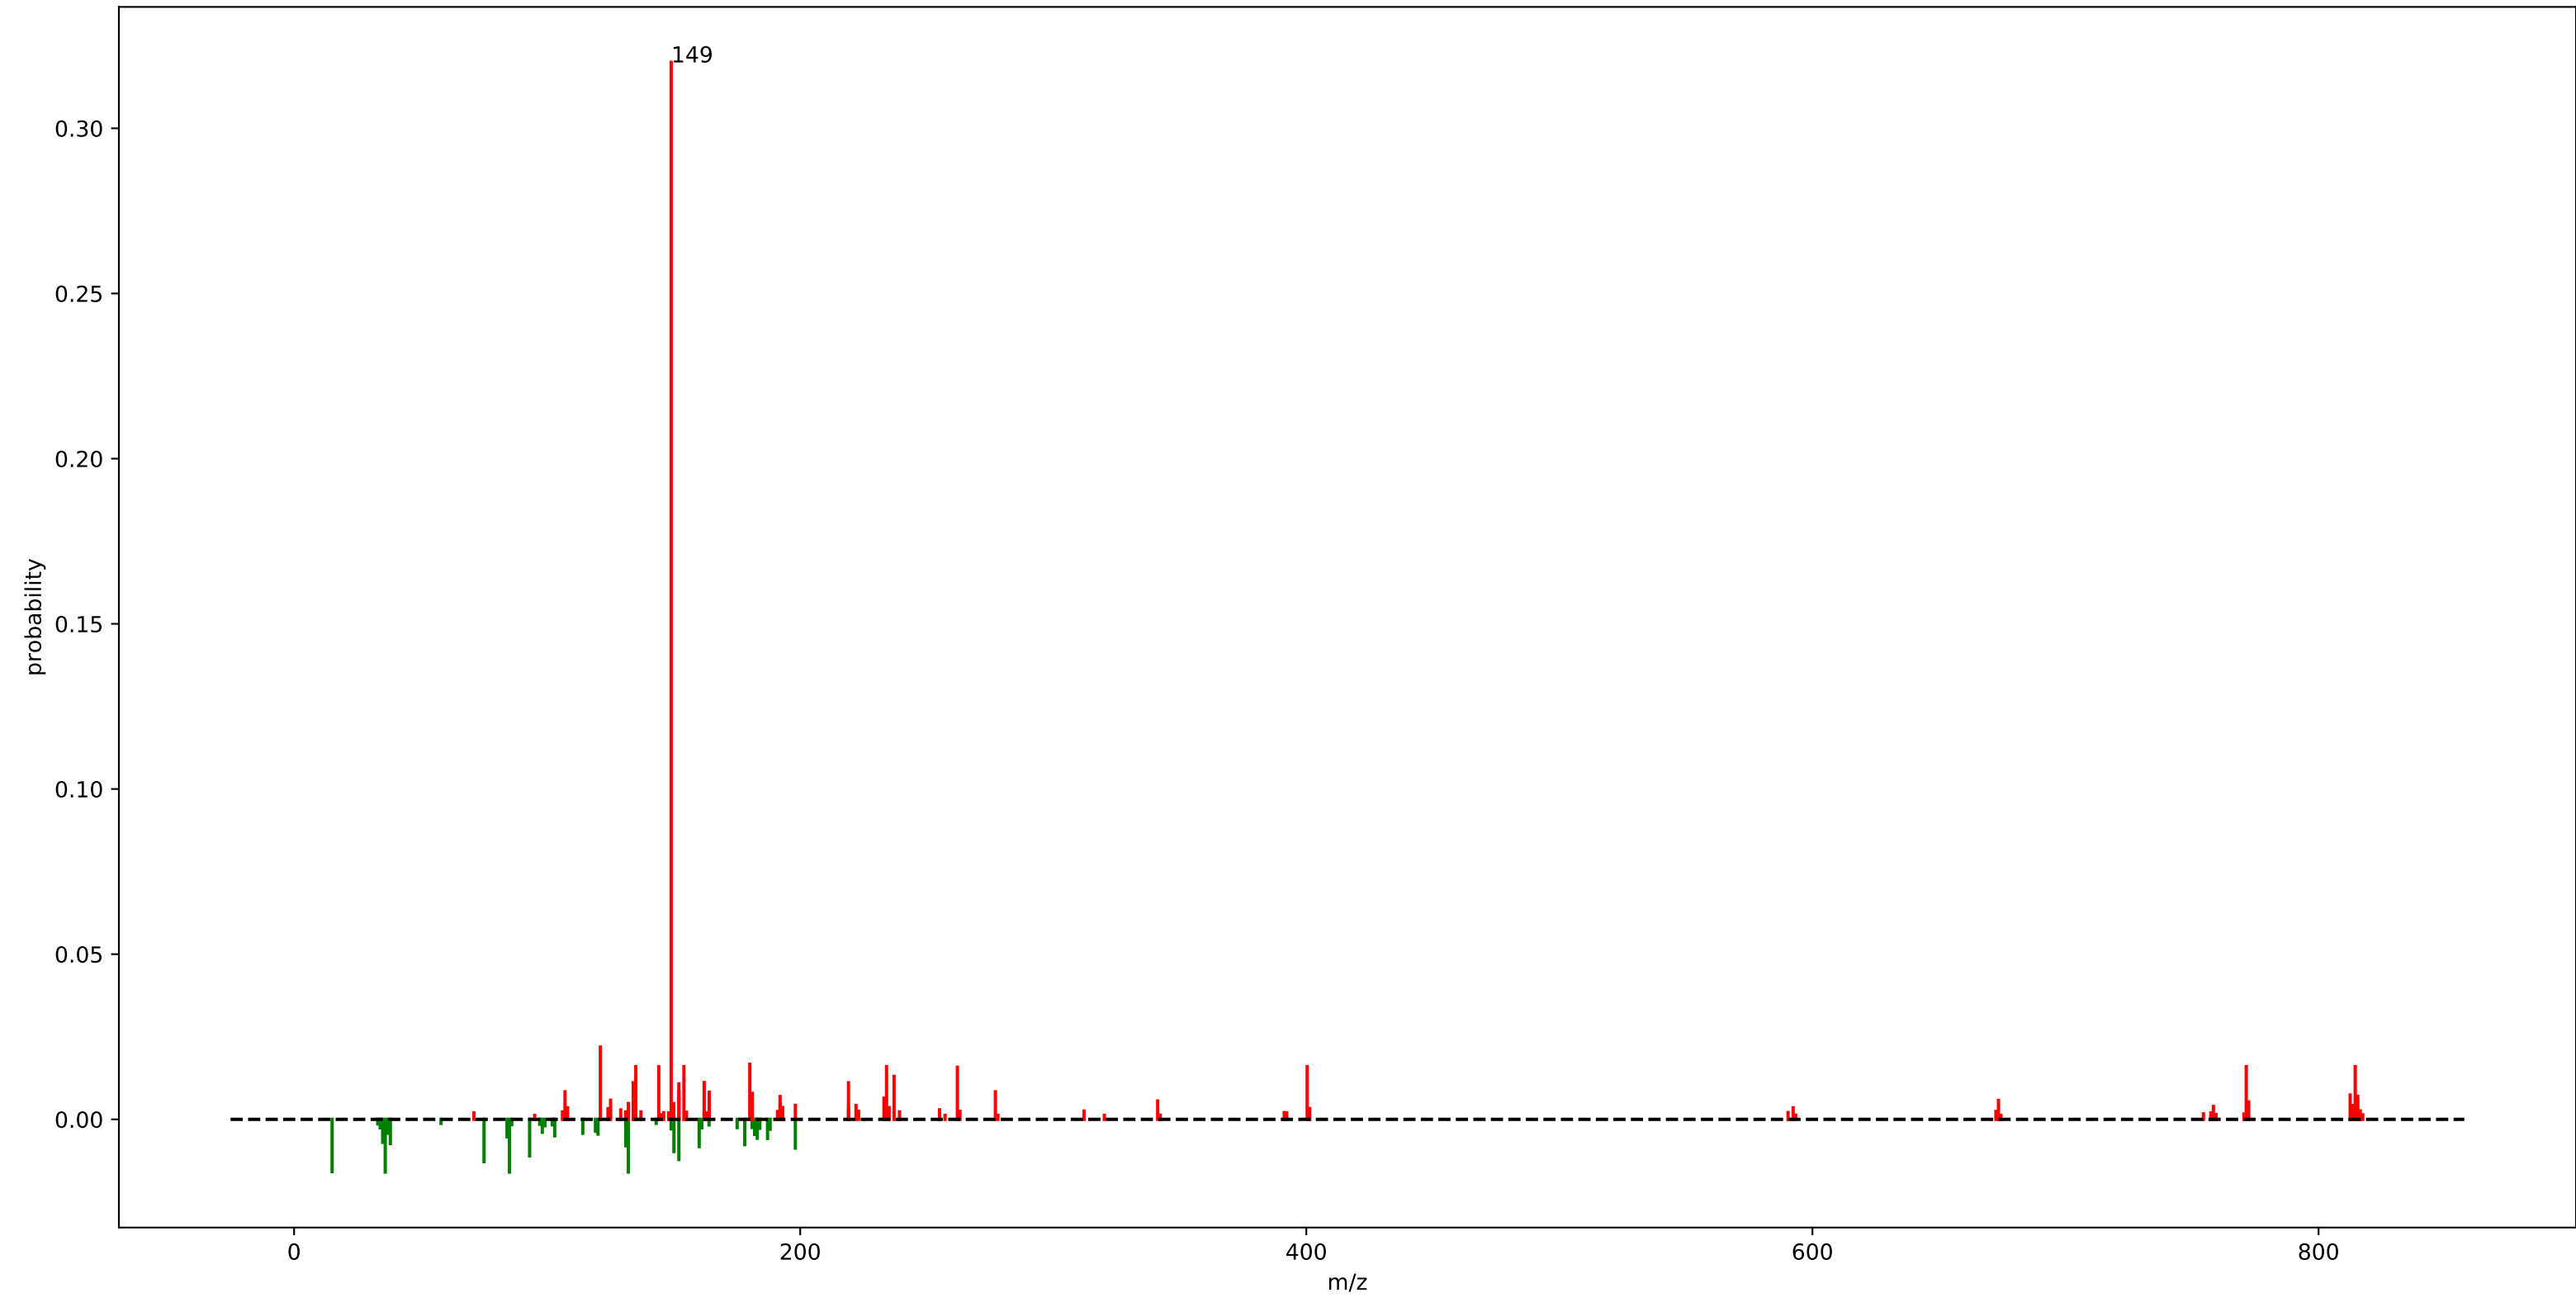

# gnps\_motif\_64.m2m

|                   |        |                   |        |                   |        |
|-------------------|--------|-------------------|--------|-------------------|--------|
| fragment_149.0225 | : 0.32 | fragment_219.0875 | : 0.01 | fragment_125.0725 | : 0.01 |
| fragment_121.0275 | : 0.02 | loss_93.0775      | : 0.01 | loss_187.0975     | : 0.01 |
| fragment_180.0775 | : 0.02 | fragment_152.0525 | : 0.01 | fragment_673.5175 | : 0.01 |
| fragment_154.0475 | : 0.02 | loss_150.1025     | : 0.01 | loss_183.0225     | : 0.01 |
| fragment_814.5025 | : 0.02 | loss_198.0775     | : 0.01 | fragment_341.2625 | : 0.01 |
| loss_85.1075      | : 0.02 | fragment_277.1325 | : 0.01 | fragment_772.3975 | : 0.01 |
| loss_132.0875     | : 0.02 | fragment_107.0625 | : 0.01 | loss_84.1425      | : 0.01 |
| loss_36.0225      | : 0.02 | fragment_152.0775 | : 0.01 |                   |        |
| fragment_771.4325 | : 0.02 | loss_160.0825     | : 0.01 |                   |        |
| fragment_400.3425 | : 0.02 | fragment_164.0475 | : 0.01 |                   |        |
| fragment_234.1175 | : 0.02 | loss_131.0925     | : 0.01 |                   |        |
| fragment_135.0275 | : 0.02 | fragment_181.0725 | : 0.01 |                   |        |
| fragment_144.1025 | : 0.02 | loss_178.0975     | : 0.01 |                   |        |
| loss_15.0225      | : 0.02 | fragment_812.4925 | : 0.01 |                   |        |
| fragment_262.1125 | : 0.02 | loss_38.0375      | : 0.01 |                   |        |
| fragment_237.0925 | : 0.01 | loss_35.0175      | : 0.01 |                   |        |
| loss_75.0675      | : 0.01 | fragment_815.5125 | : 0.01 |                   |        |
| loss_152.0475     | : 0.01 | fragment_192.0425 | : 0.01 |                   |        |
| fragment_162.0625 | : 0.01 | fragment_134.0675 | : 0.01 |                   |        |
| fragment_134.0425 | : 0.01 | fragment_233.1075 | : 0.01 |                   |        |

motif\_536

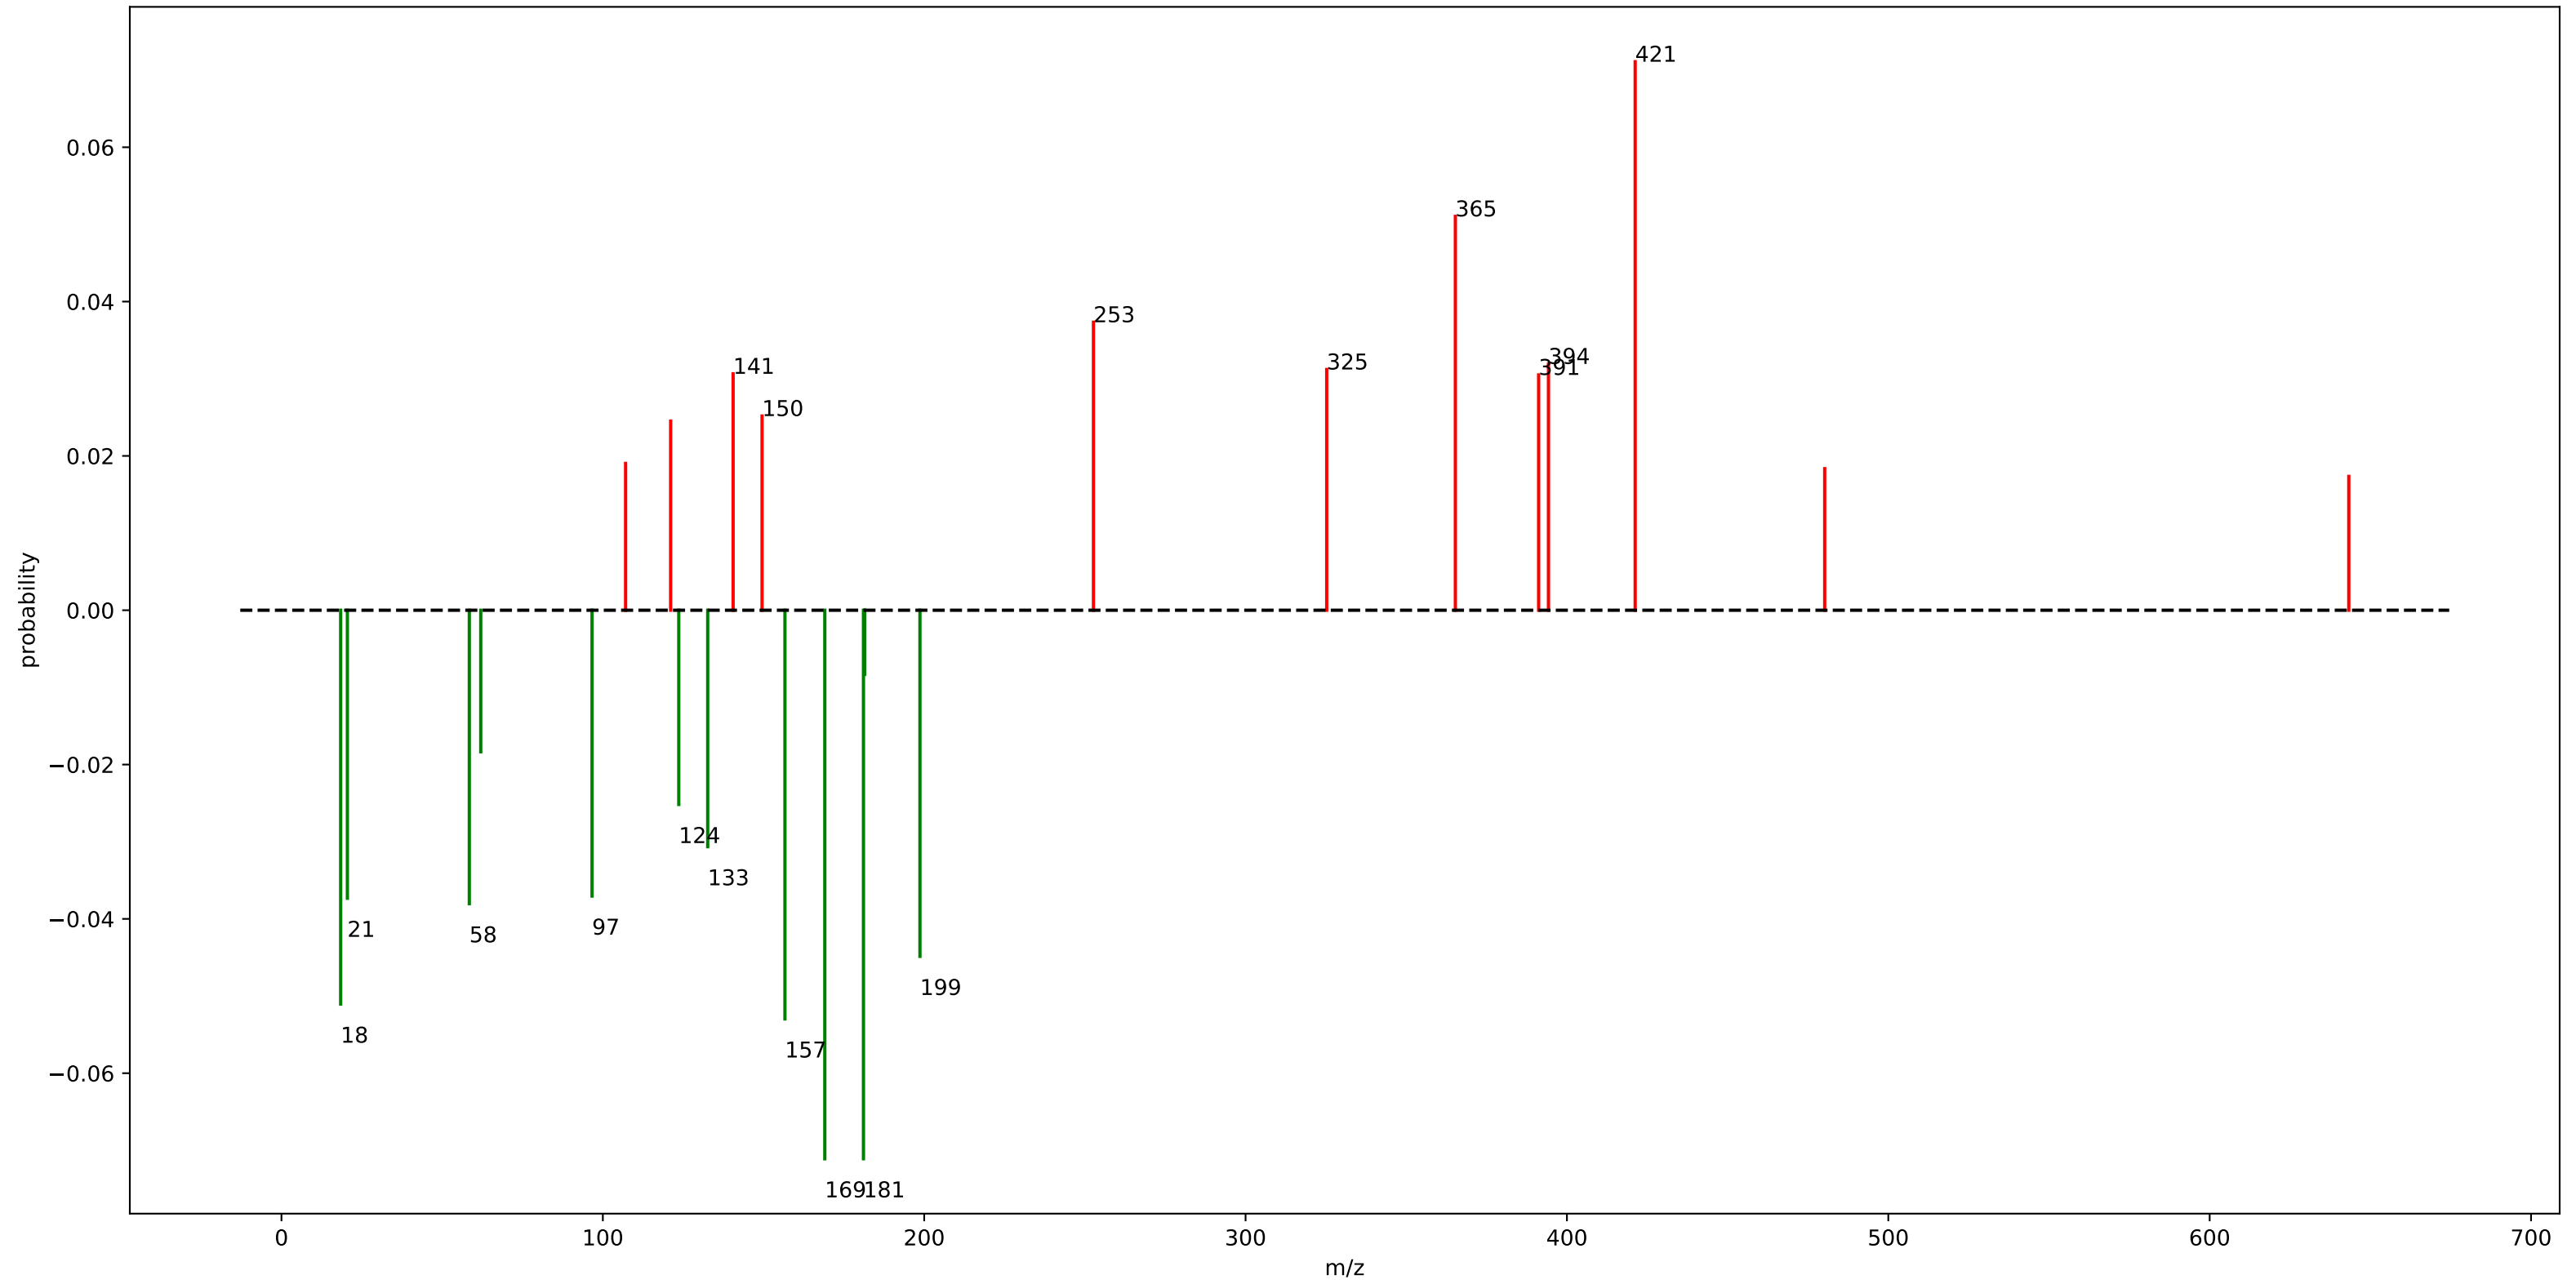

## motif\_536

|                   |        |                   |        |
|-------------------|--------|-------------------|--------|
| loss_169.0725     | : 0.07 | fragment_480.2125 | : 0.02 |
| loss_181.1025     | : 0.07 | loss_62.0125      | : 0.02 |
| fragment_421.2375 | : 0.07 | fragment_643.2975 | : 0.02 |
| loss_156.6675     | : 0.05 | loss_181.4725     | : 0.01 |
| loss_18.4225      | : 0.05 |                   |        |
| fragment_365.2825 | : 0.05 |                   |        |
| loss_198.6775     | : 0.04 |                   |        |
| loss_58.4525      | : 0.04 |                   |        |
| loss_20.5125      | : 0.04 |                   |        |
| fragment_252.6675 | : 0.04 |                   |        |
| loss_96.6425      | : 0.04 |                   |        |
| fragment_394.2575 | : 0.03 |                   |        |
| fragment_325.2525 | : 0.03 |                   |        |
| fragment_140.5425 | : 0.03 |                   |        |
| loss_132.6375     | : 0.03 |                   |        |
| fragment_391.1975 | : 0.03 |                   |        |
| loss_123.6325     | : 0.03 |                   |        |
| fragment_149.5475 | : 0.03 |                   |        |
| fragment_121.1025 | : 0.02 |                   |        |
| fragment_107.0825 | : 0.02 |                   |        |

euphorbia\_motif\_78.m2m

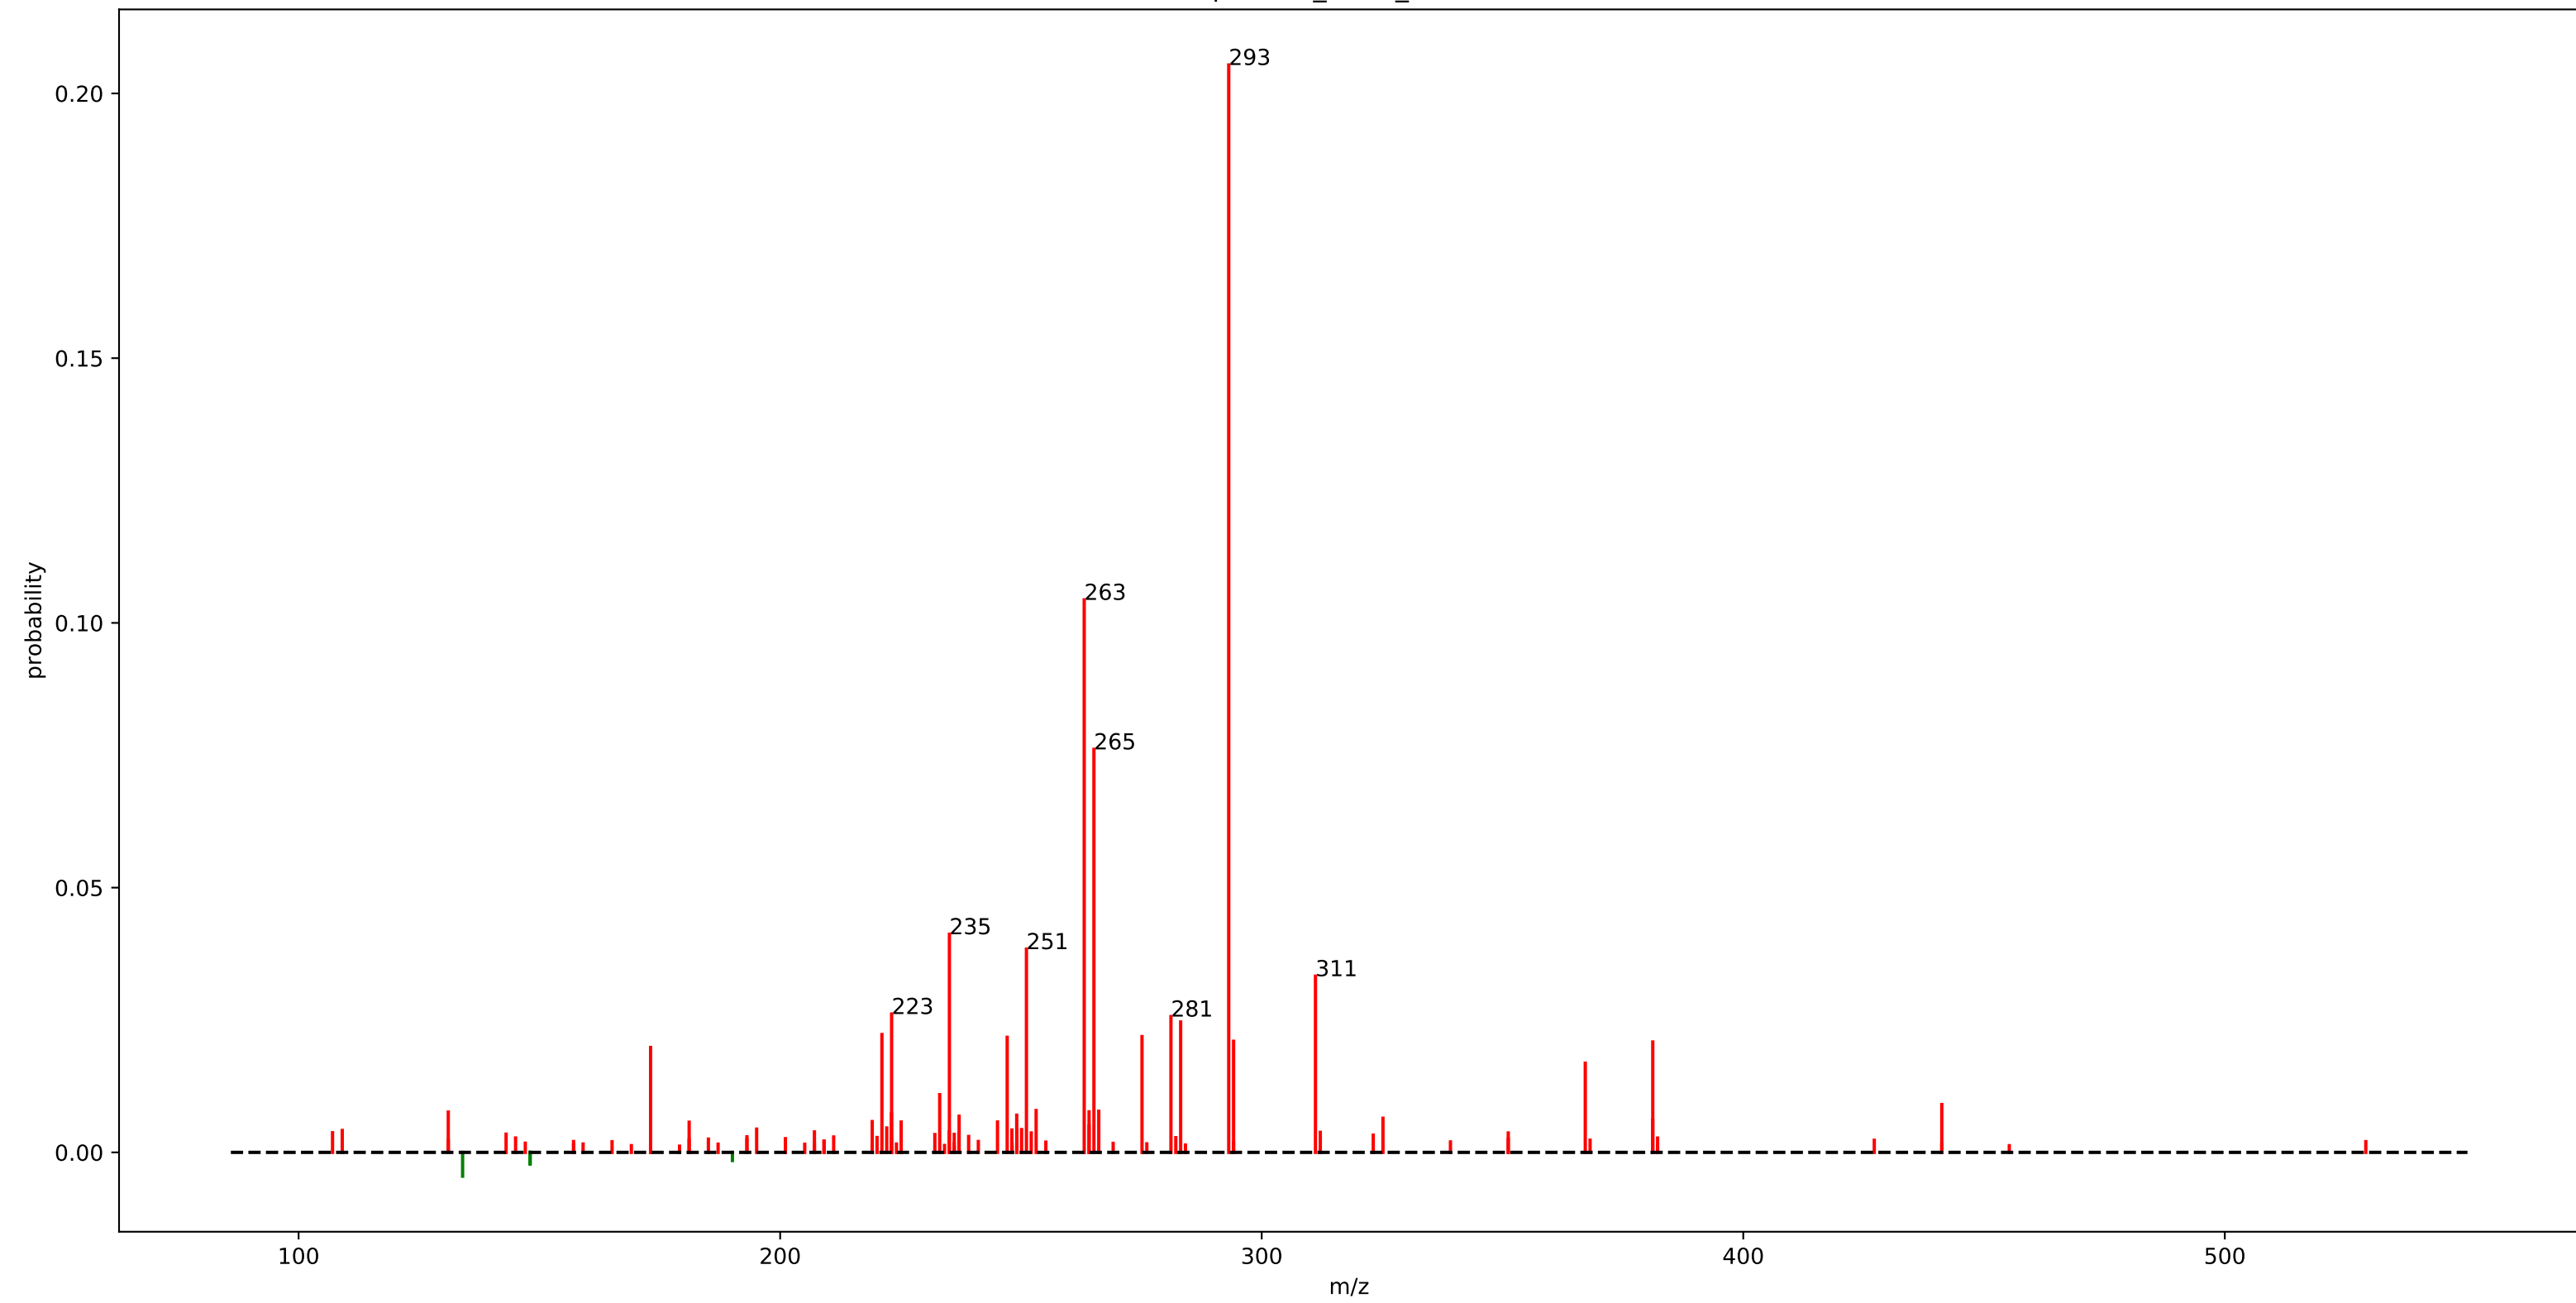

# euphorbia\_motif\_78.m2m

|                   |        |                   |        |
|-------------------|--------|-------------------|--------|
| fragment_293.1525 | : 0.21 | fragment_264.1475 | : 0.01 |
| fragment_263.1425 | : 0.10 | fragment_131.0825 | : 0.01 |
| fragment_265.1575 | : 0.08 | fragment_223.1125 | : 0.01 |
| fragment_235.1475 | : 0.04 | fragment_249.1275 | : 0.01 |
| fragment_251.1425 | : 0.04 | fragment_237.1625 | : 0.01 |
| fragment_311.1625 | : 0.03 | fragment_325.1775 | : 0.01 |
| fragment_223.1475 | : 0.03 | fragment_381.2025 | : 0.01 |
| fragment_281.1525 | : 0.03 | fragment_219.1175 | : 0.01 |
| fragment_283.1675 | : 0.02 | fragment_245.1325 | : 0.01 |
| fragment_221.1325 | : 0.02 | fragment_225.1275 | : 0.01 |
| fragment_275.1425 | : 0.02 | fragment_181.1025 | : 0.01 |
| fragment_247.1475 | : 0.02 |                   |        |
| fragment_294.1575 | : 0.02 |                   |        |
| fragment_381.2075 | : 0.02 |                   |        |
| fragment_173.0975 | : 0.02 |                   |        |
| fragment_367.1925 | : 0.02 |                   |        |
| fragment_233.1325 | : 0.01 |                   |        |
| fragment_441.2275 | : 0.01 |                   |        |
| fragment_253.1575 | : 0.01 |                   |        |
| fragment_266.1625 | : 0.01 |                   |        |

euphorbia\_motif\_477.m2m

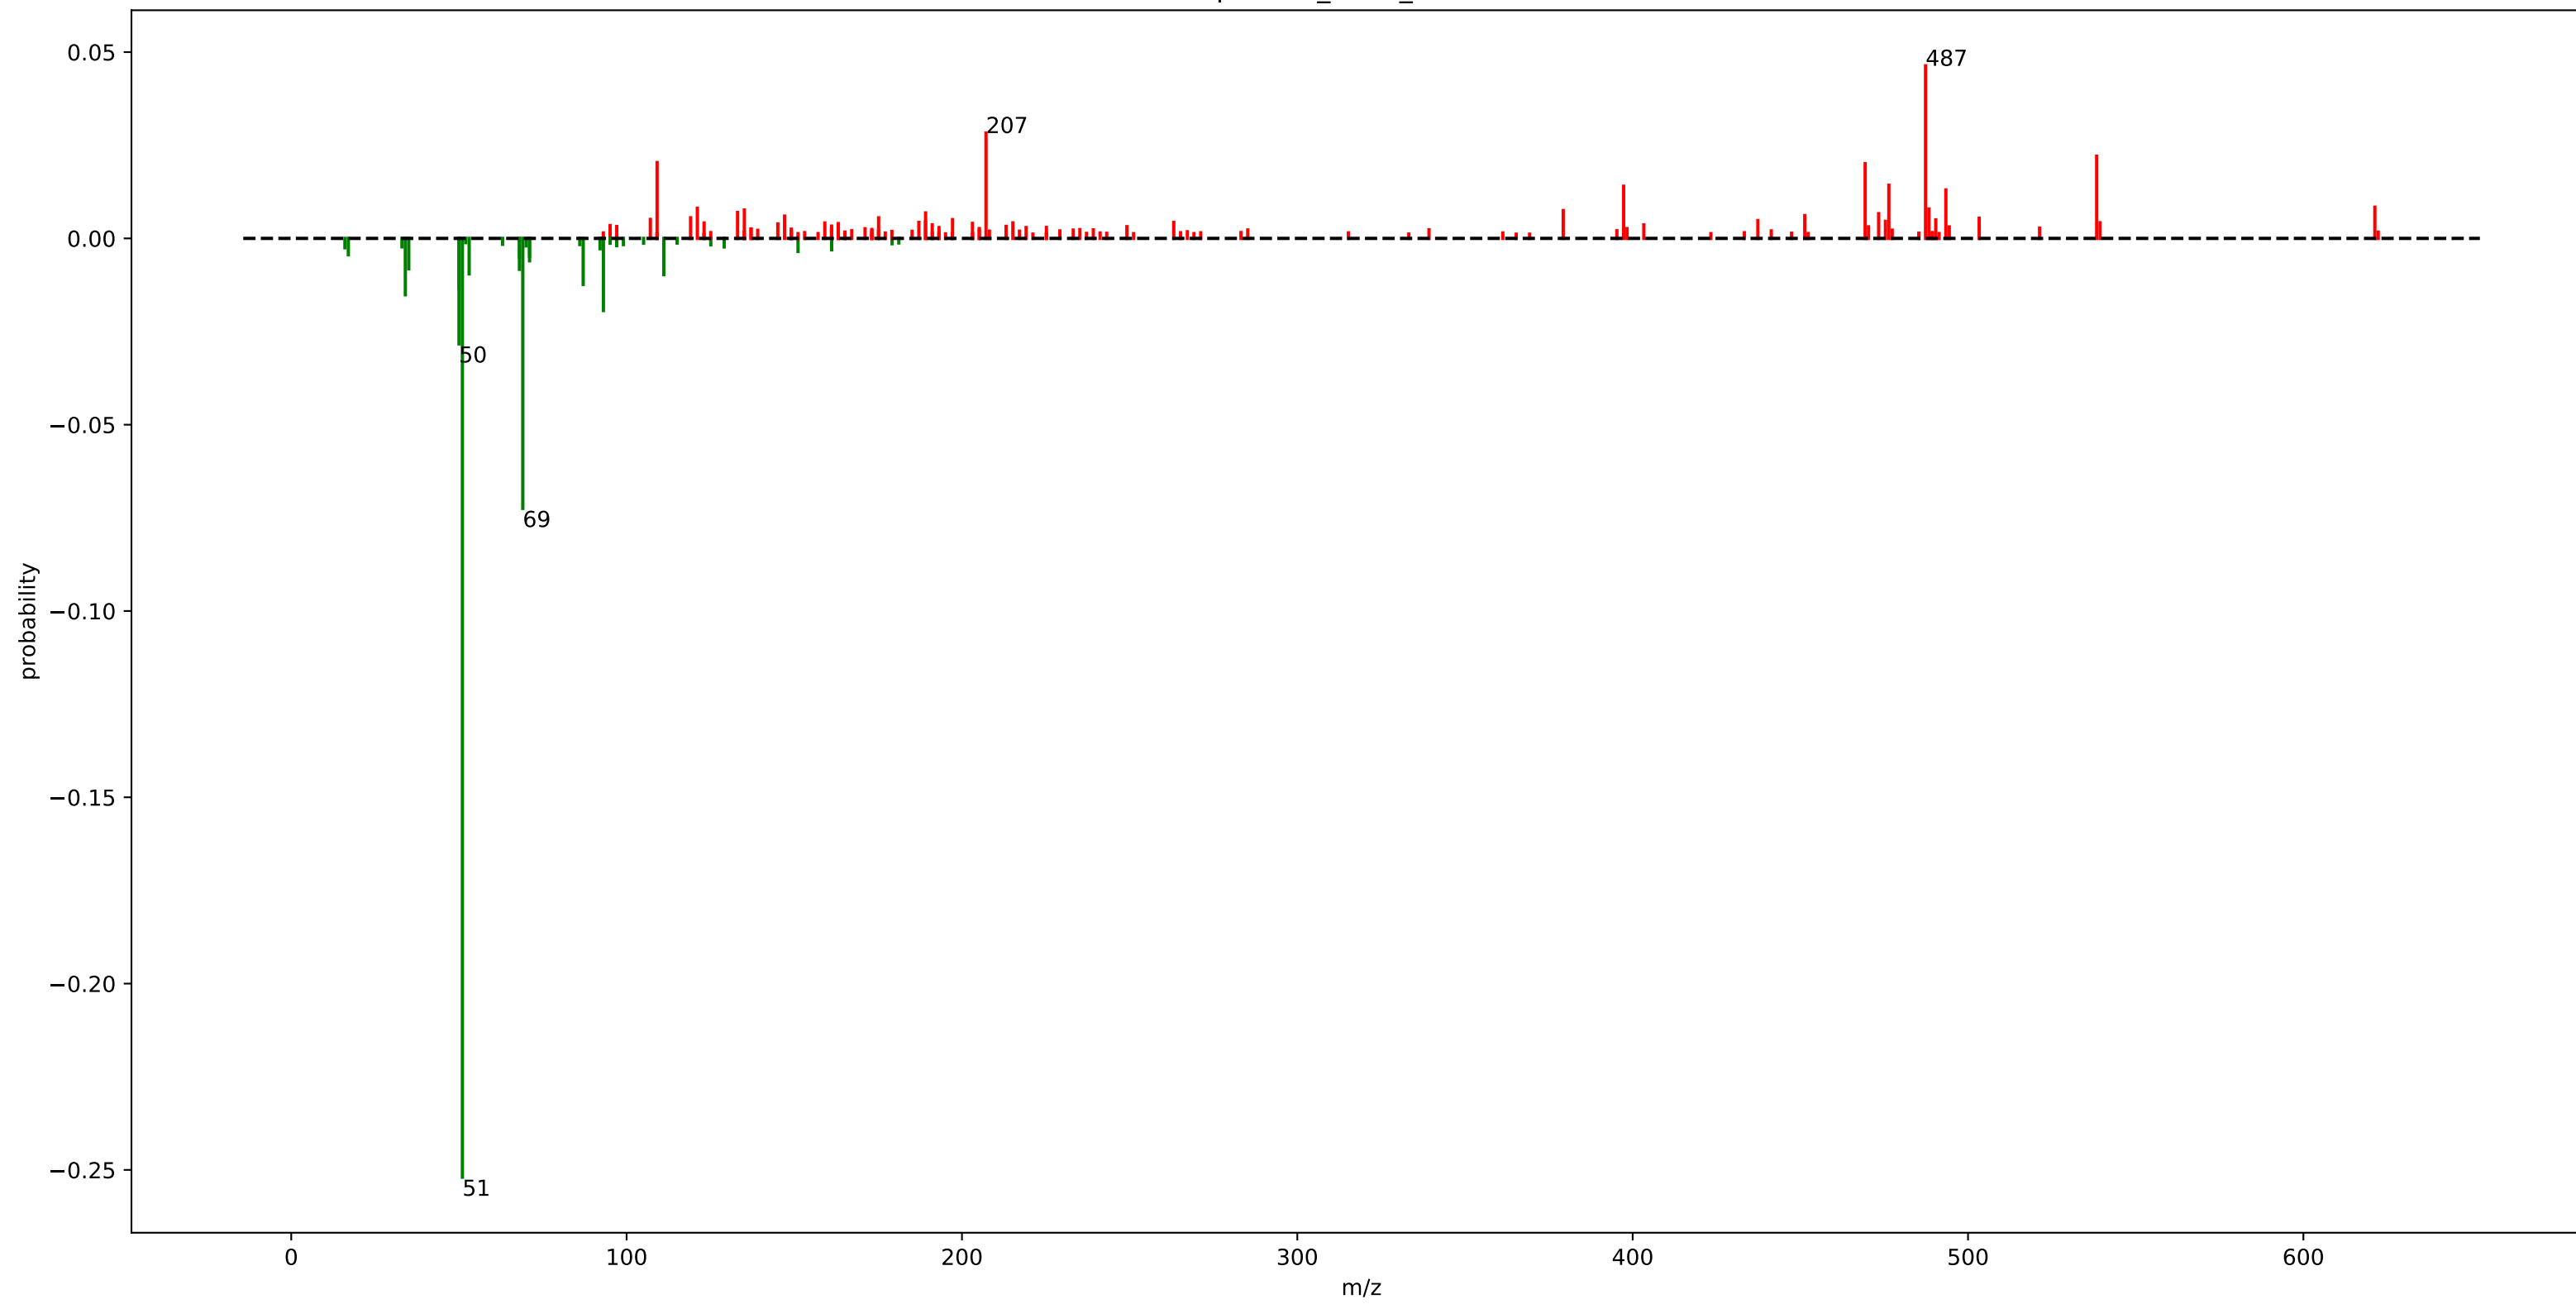

# euphorbia\_motif\_477.m2m

|                   |        |                   |        |
|-------------------|--------|-------------------|--------|
| loss_51.0375      | : 0.25 | fragment_121.0975 | : 0.01 |
| loss_69.0475      | : 0.07 | fragment_488.3325 | : 0.01 |
| fragment_487.3325 | : 0.05 | fragment_135.1125 | : 0.01 |
| loss_50.0325      | : 0.03 | fragment_379.2925 | : 0.01 |
| fragment_207.1725 | : 0.03 | fragment_133.0975 | : 0.01 |
| fragment_538.3625 | : 0.02 | fragment_189.1575 | : 0.01 |
| fragment_109.0975 | : 0.02 | fragment_473.3525 | : 0.01 |
| fragment_469.3225 | : 0.02 | fragment_451.3125 | : 0.01 |
| loss_93.0825      | : 0.02 | loss_71.0625      | : 0.01 |
| loss_34.0225      | : 0.02 | fragment_147.1125 | : 0.01 |
| fragment_476.3875 | : 0.01 | fragment_119.0825 | : 0.01 |
| fragment_397.3025 | : 0.01 | fragment_175.1475 | : 0.01 |
| loss_50.0375      | : 0.01 | fragment_503.3275 | : 0.01 |
| fragment_493.3875 | : 0.01 | fragment_107.0825 | : 0.01 |
| loss_87.0575      | : 0.01 | fragment_197.1925 | : 0.01 |
| loss_111.0925     | : 0.01 |                   |        |
| loss_53.0525      | : 0.01 |                   |        |
| fragment_621.3075 | : 0.01 |                   |        |
| loss_68.0475      | : 0.01 |                   |        |
| loss_35.0475      | : 0.01 |                   |        |



urine\_mass2motif\_105.m2m

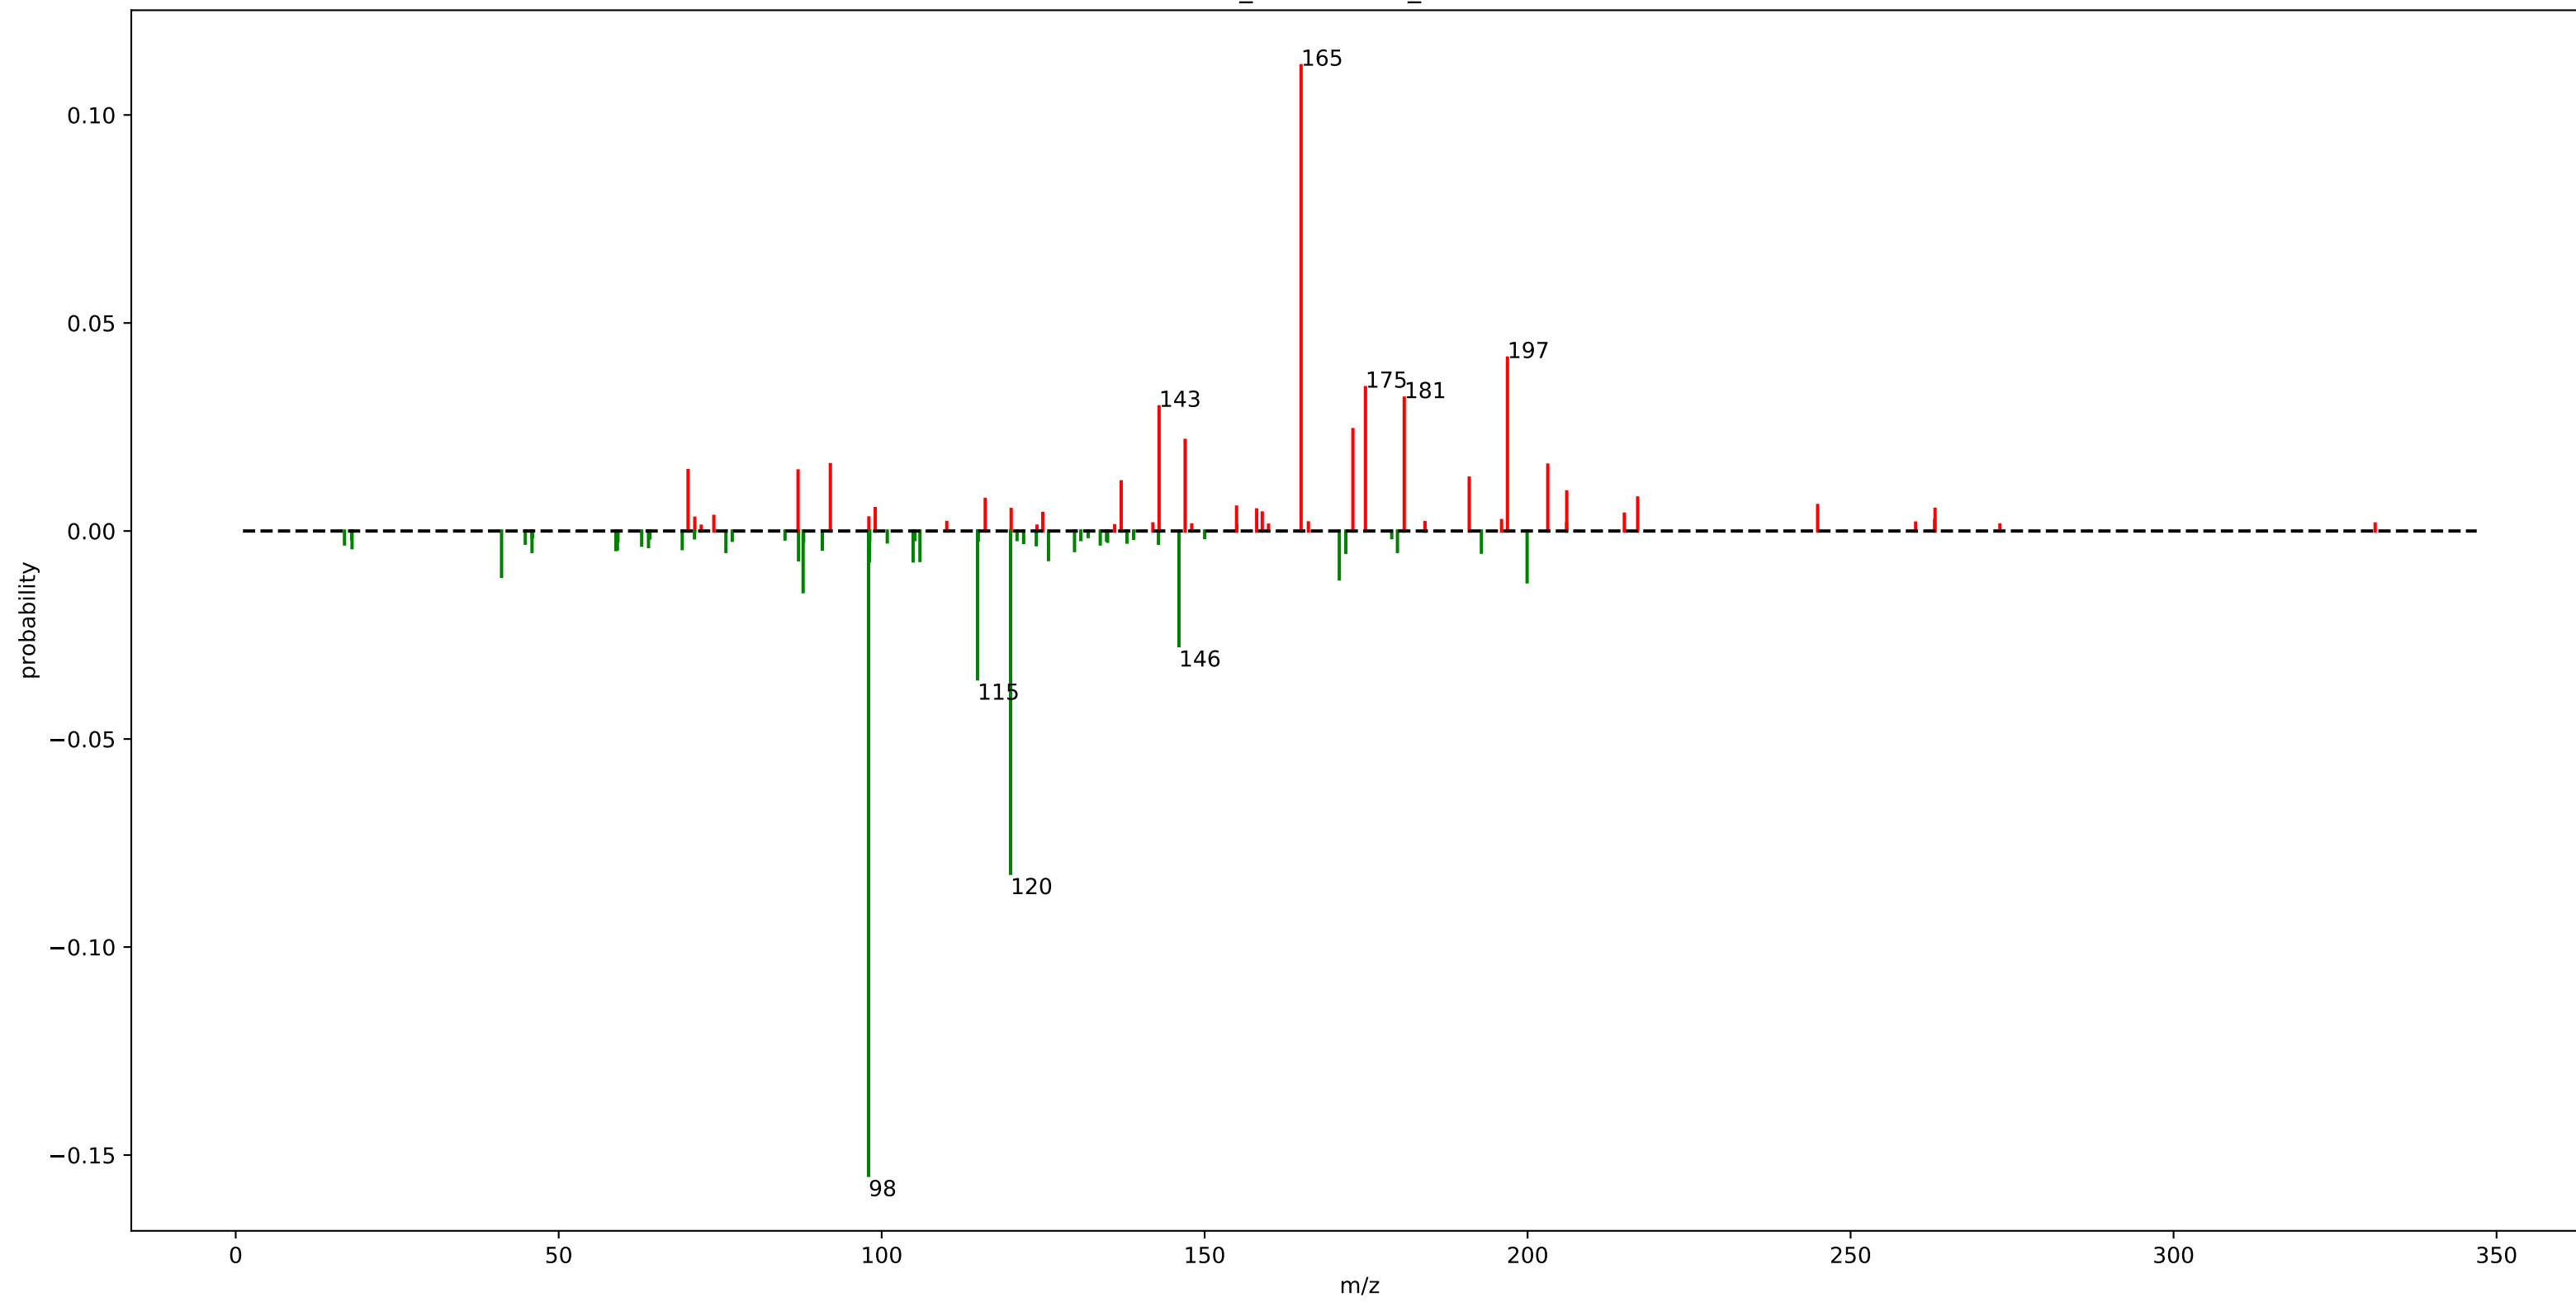

# urine\_mass2motif\_105.m2m

|                   |        |                   |        |
|-------------------|--------|-------------------|--------|
| loss_97.9775      | : 0.15 | loss_41.1575      | : 0.01 |
| fragment_164.9325 | : 0.11 | fragment_206.0575 | : 0.01 |
| loss_119.9575     | : 0.08 | fragment_217.0375 | : 0.01 |
| fragment_196.8775 | : 0.04 | fragment_116.0325 | : 0.01 |
| loss_114.8425     | : 0.04 | loss_104.8675     | : 0.01 |
| fragment_174.8975 | : 0.03 | loss_98.1075      | : 0.01 |
| fragment_180.9025 | : 0.03 | loss_105.9275     | : 0.01 |
| fragment_142.9475 | : 0.03 | loss_87.1325      | : 0.01 |
| loss_146.0225     | : 0.03 | loss_125.8275     | : 0.01 |
| fragment_172.9525 | : 0.02 | fragment_244.8975 | : 0.01 |
| fragment_146.9825 | : 0.02 | fragment_154.9425 | : 0.01 |
| fragment_92.0575  | : 0.02 | fragment_99.0075  | : 0.01 |
| fragment_203.1225 | : 0.02 | fragment_263.0775 | : 0.01 |
| loss_87.8425      | : 0.01 | fragment_120.0525 | : 0.01 |
| fragment_70.0275  | : 0.01 | loss_171.8525     | : 0.01 |
| fragment_87.0575  | : 0.01 | loss_192.8425     | : 0.01 |
| fragment_190.9625 | : 0.01 | fragment_158.0575 | : 0.01 |
| loss_199.9225     | : 0.01 |                   |        |
| fragment_137.0825 | : 0.01 |                   |        |
| loss_170.8475     | : 0.01 |                   |        |

StrepSalini\_motif\_108.m2m

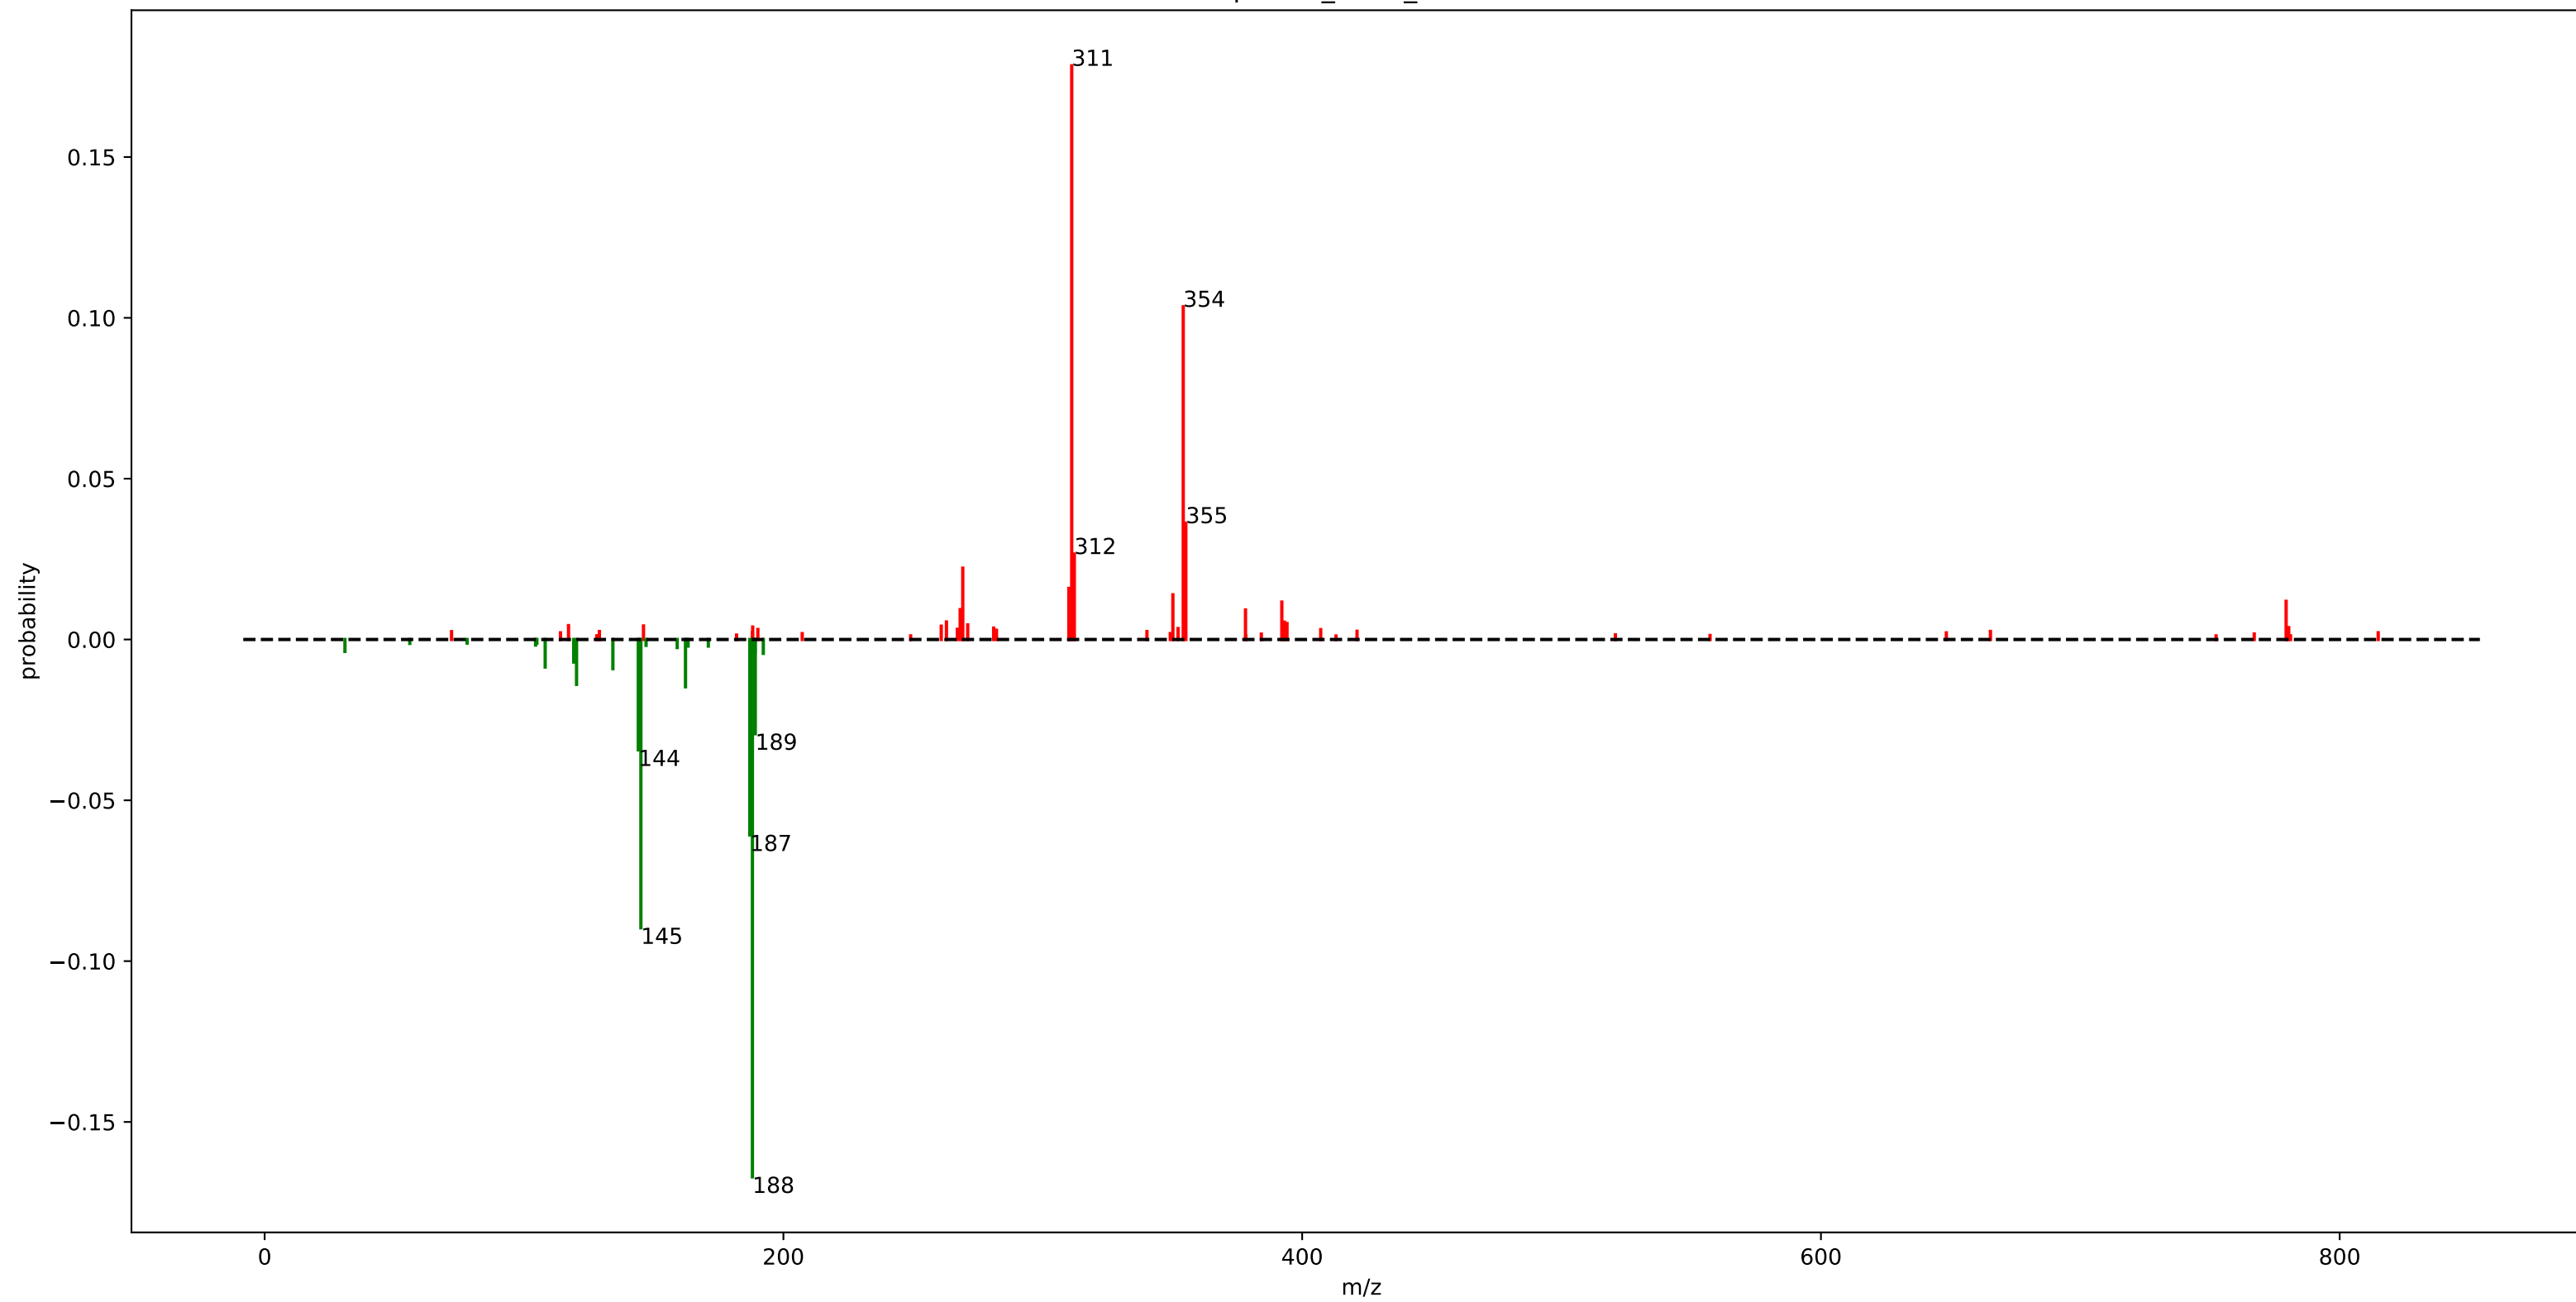

## StrepSalini\_motif\_108.m2m

|                   |        |                   |        |
|-------------------|--------|-------------------|--------|
| fragment_311.1500 | : 0.18 | loss_119.1500     | : 0.01 |
| loss_188.0500     | : 0.17 | fragment_262.8500 | : 0.01 |
| fragment_354.1500 | : 0.10 | fragment_393.1500 | : 0.01 |
| loss_145.0500     | : 0.09 |                   |        |
| loss_187.0500     | : 0.06 |                   |        |
| fragment_355.1500 | : 0.04 |                   |        |
| loss_144.0525     | : 0.03 |                   |        |
| loss_189.1500     | : 0.03 |                   |        |
| fragment_312.1500 | : 0.03 |                   |        |
| fragment_269.1500 | : 0.02 |                   |        |
| fragment_310.0500 | : 0.02 |                   |        |
| loss_162.2500     | : 0.01 |                   |        |
| loss_120.2500     | : 0.01 |                   |        |
| fragment_350.1500 | : 0.01 |                   |        |
| fragment_779.3500 | : 0.01 |                   |        |
| fragment_392.1500 | : 0.01 |                   |        |
| fragment_268.1525 | : 0.01 |                   |        |
| fragment_378.1500 | : 0.01 |                   |        |
| loss_134.2500     | : 0.01 |                   |        |
| loss_108.1525     | : 0.01 |                   |        |

rhabdus\_motif\_58.m2m

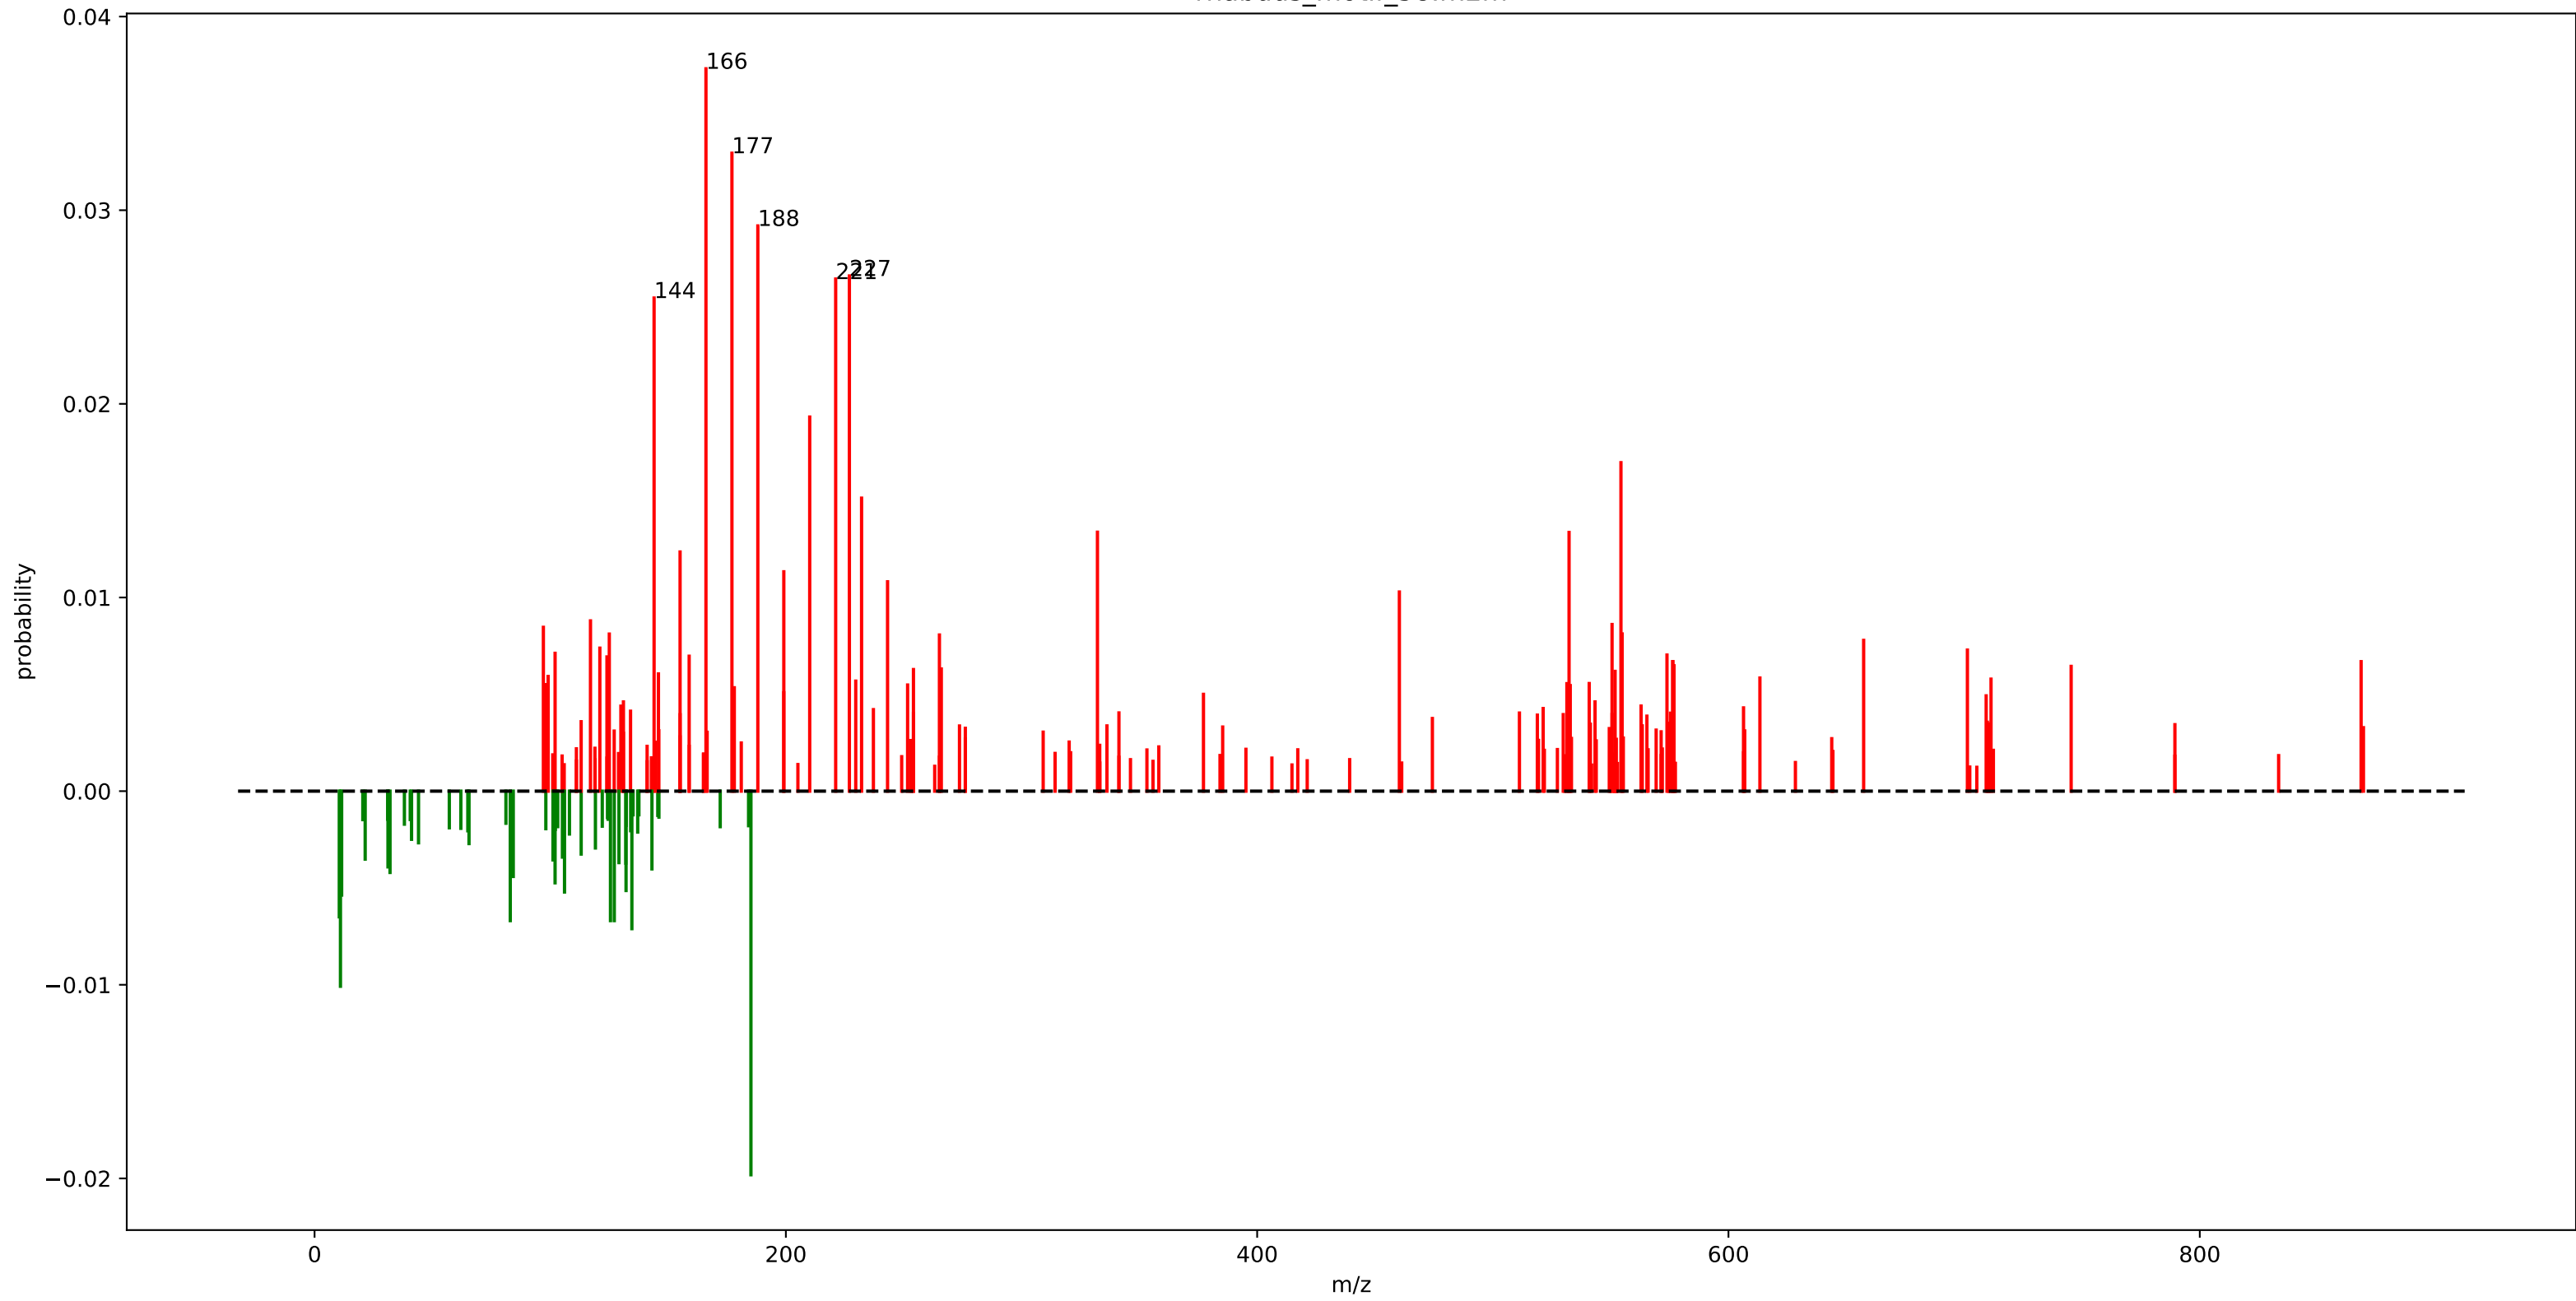

# rhabdus\_motif\_58.m2m

|                   |        |                   |        |                   |        |
|-------------------|--------|-------------------|--------|-------------------|--------|
| fragment_166.0875 | : 0.04 | fragment_554.8725 | : 0.01 | fragment_265.9625 | : 0.01 |
| fragment_177.1125 | : 0.03 | fragment_125.0725 | : 0.01 | fragment_254.1425 | : 0.01 |
| fragment_188.1025 | : 0.03 | fragment_265.1625 | : 0.01 | fragment_551.8925 | : 0.01 |
| fragment_226.9525 | : 0.03 | fragment_657.3675 | : 0.01 | fragment_145.9275 | : 0.01 |
| fragment_221.1375 | : 0.03 | fragment_121.0625 | : 0.01 | fragment_99.1125  | : 0.01 |
| fragment_144.0775 | : 0.03 | fragment_701.3925 | : 0.01 | fragment_613.3425 | : 0.01 |
| loss_185.1775     | : 0.02 | fragment_102.0675 | : 0.01 | fragment_711.4175 | : 0.01 |
| fragment_210.1175 | : 0.02 | loss_134.6525     | : 0.01 | fragment_229.6525 | : 0.01 |
| fragment_554.3725 | : 0.02 | fragment_573.9075 | : 0.01 | fragment_540.9025 | : 0.01 |
| fragment_232.1275 | : 0.02 | fragment_158.9625 | : 0.01 | fragment_531.4325 | : 0.01 |
| fragment_332.2225 | : 0.01 | fragment_124.0775 | : 0.01 | fragment_97.9675  | : 0.01 |
| fragment_532.3575 | : 0.01 | fragment_868.4625 | : 0.01 | fragment_251.6625 | : 0.01 |
| fragment_155.1075 | : 0.01 | fragment_576.3775 | : 0.01 | fragment_532.8575 | : 0.01 |
| fragment_199.1275 | : 0.01 | fragment_576.3675 | : 0.01 | loss_11.4925      | : 0.01 |
| fragment_243.1525 | : 0.01 | loss_83.0525      | : 0.01 | fragment_178.1175 | : 0.01 |
| fragment_460.3425 | : 0.01 | loss_125.5725     | : 0.01 | loss_106.0675     | : 0.01 |
| loss_10.9875      | : 0.01 | loss_127.1875     | : 0.01 | loss_132.1775     | : 0.01 |
| fragment_117.0875 | : 0.01 | loss_10.4875      | : 0.01 | fragment_199.1225 | : 0.01 |
| fragment_550.5975 | : 0.01 | fragment_576.8875 | : 0.01 |                   |        |
| fragment_97.0975  | : 0.01 | fragment_745.4175 | : 0.01 |                   |        |

motif\_669

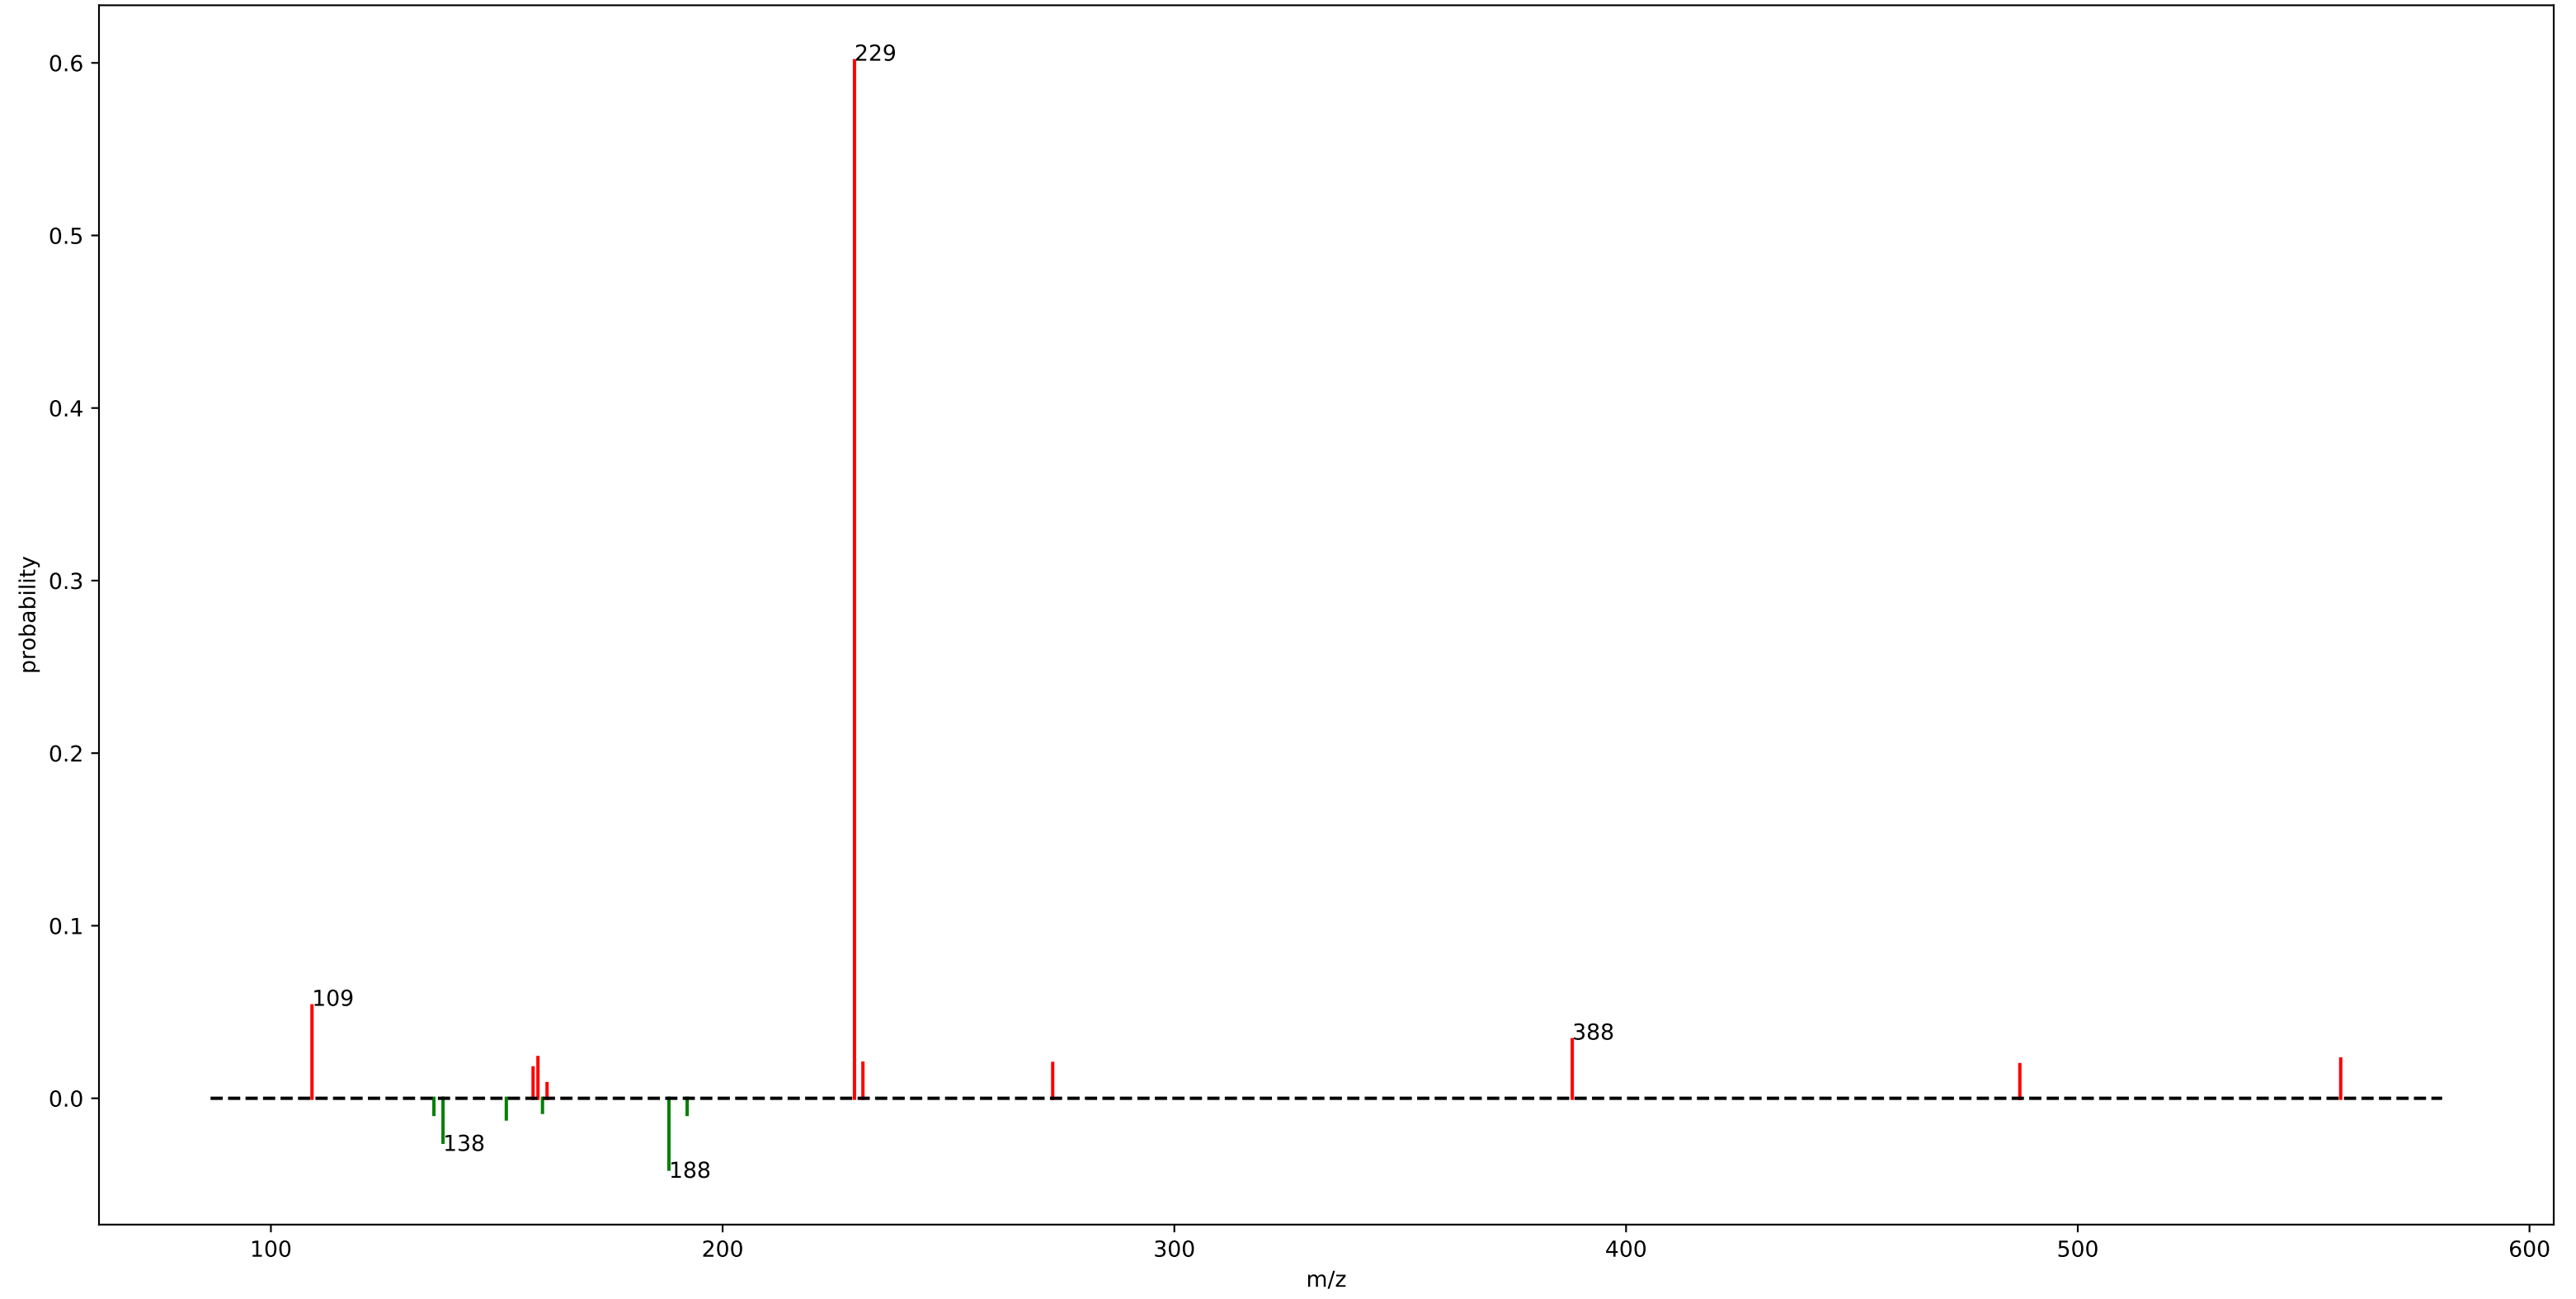

## motif\_669

|                   |        |
|-------------------|--------|
| fragment_229.1925 | : 0.60 |
| fragment_109.0975 | : 0.05 |
| loss_188.1175     | : 0.04 |
| fragment_388.0975 | : 0.03 |
| loss_138.1025     | : 0.03 |
| fragment_159.1175 | : 0.02 |
| fragment_558.2075 | : 0.02 |
| fragment_231.0575 | : 0.02 |
| fragment_273.0725 | : 0.02 |
| fragment_487.1675 | : 0.02 |
| fragment_158.0425 | : 0.02 |
| loss_152.1175     | : 0.01 |
| loss_192.1475     | : 0.01 |
| loss_136.0875     | : 0.01 |
| fragment_161.1325 | : 0.01 |
| loss_160.1225     | : 0.01 |



gnps\_motif\_17.m2m

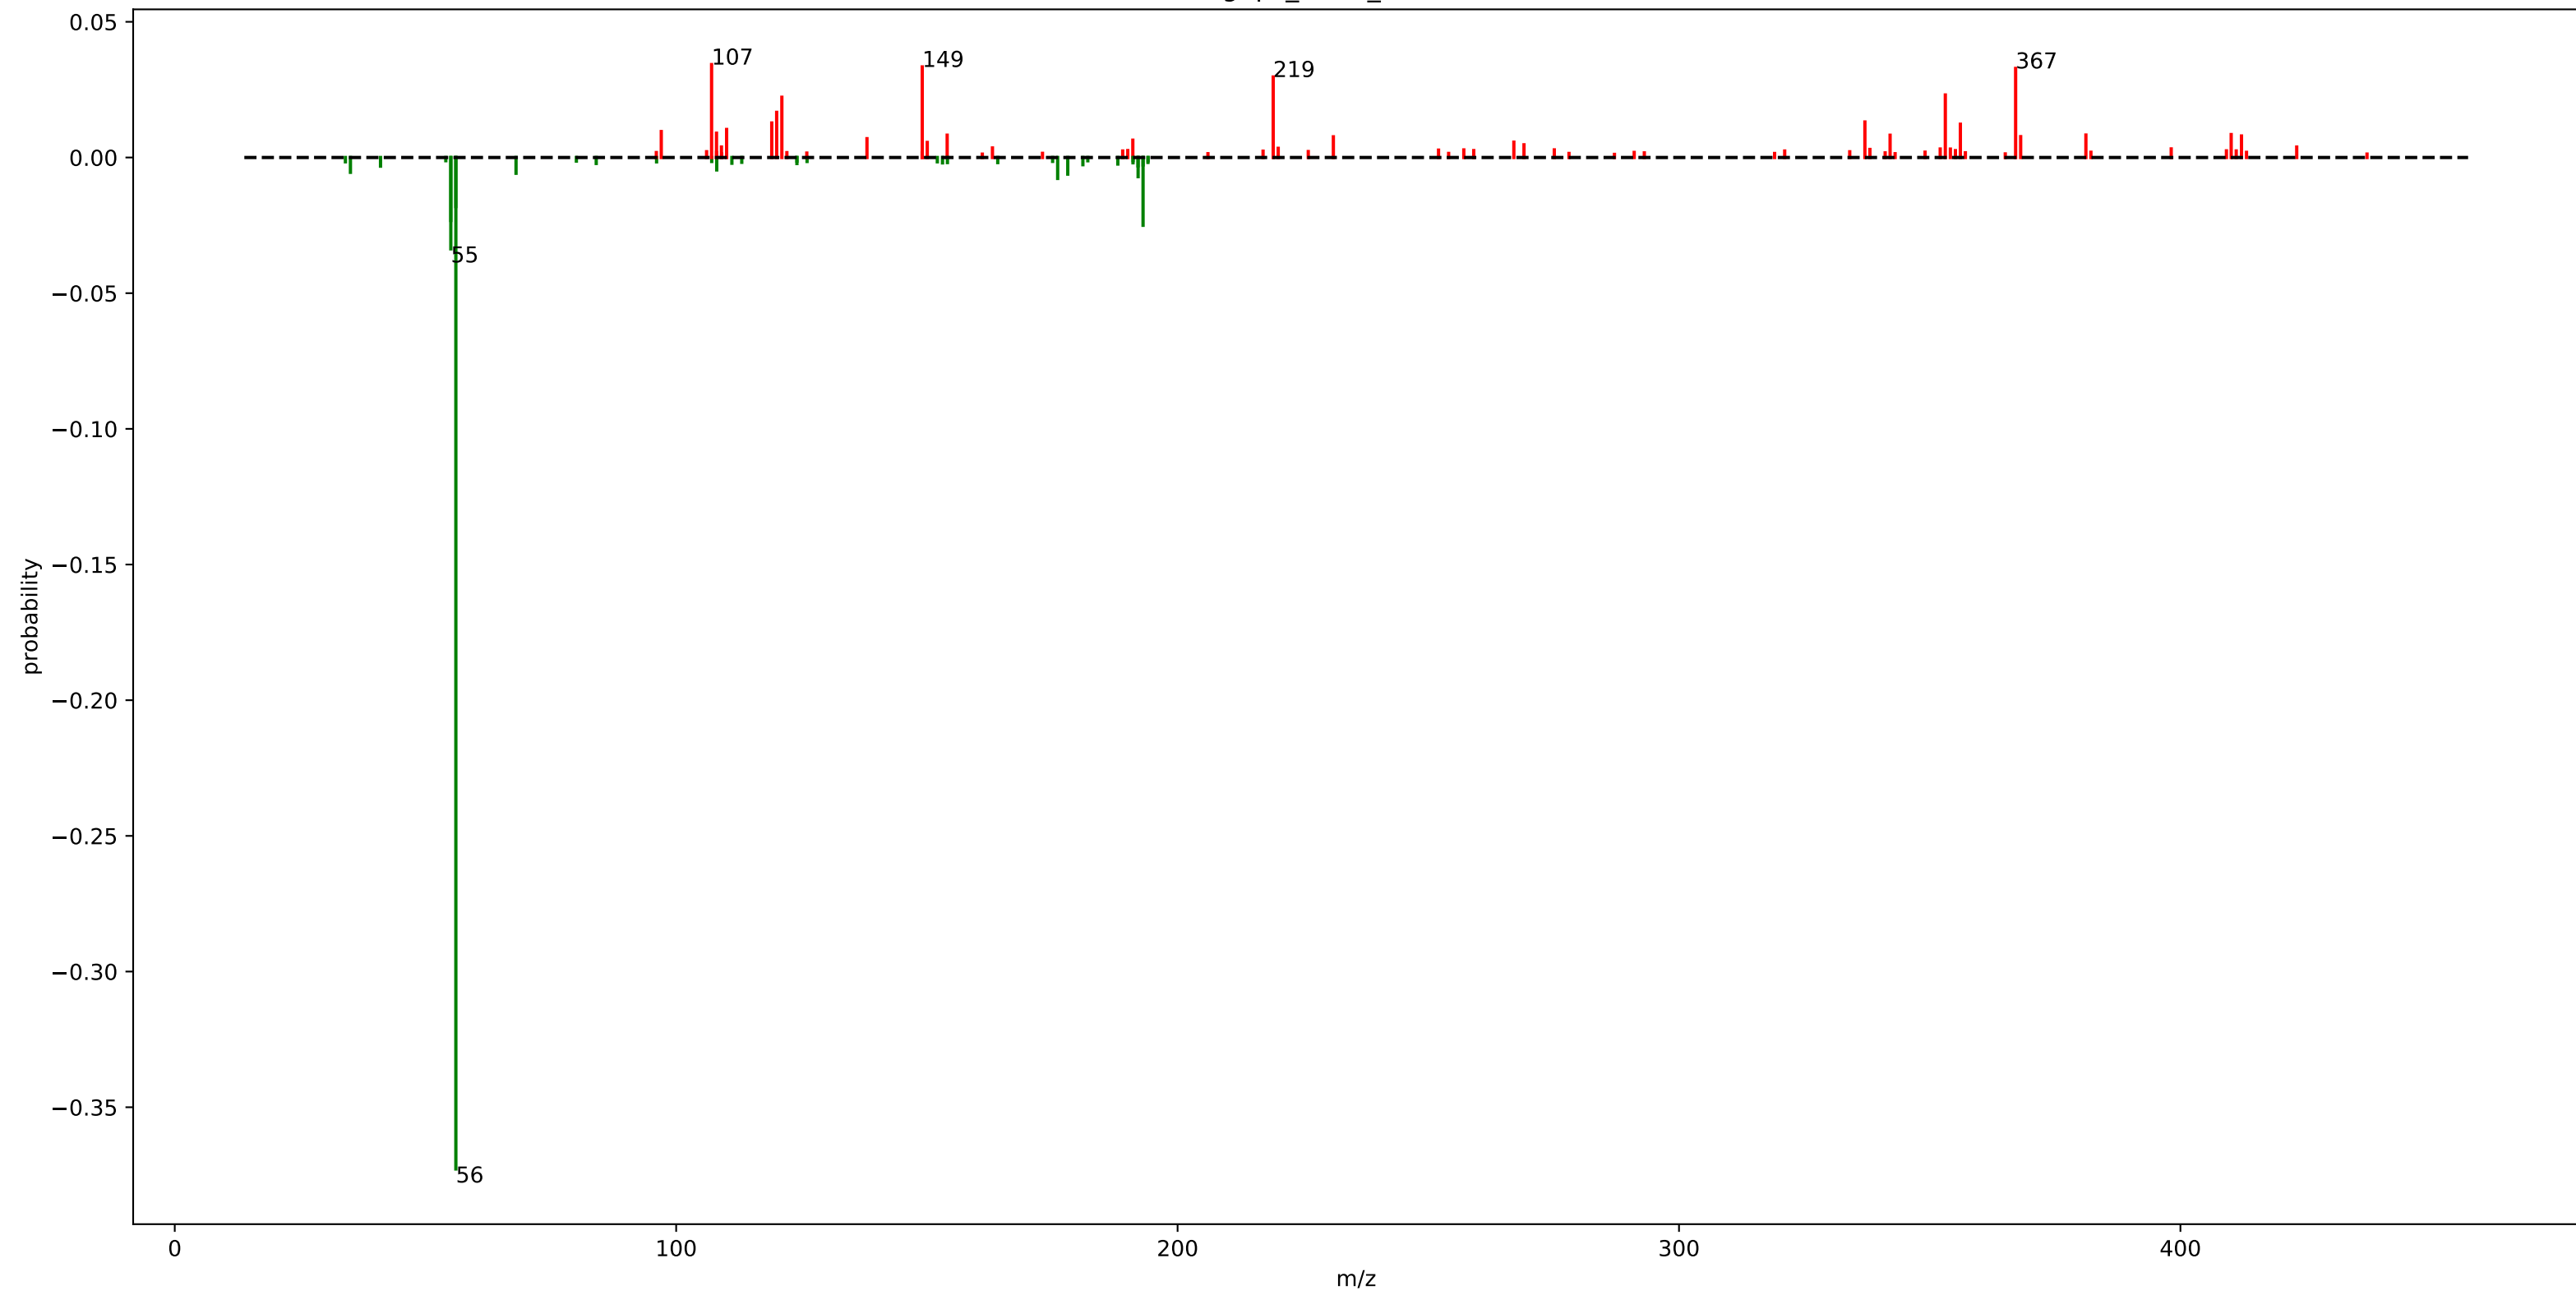

# gnps\_motif\_17.m2m

|                   |        |                   |        |
|-------------------|--------|-------------------|--------|
| loss_56.0625      | : 0.37 | fragment_154.0475 | : 0.01 |
| fragment_107.0625 | : 0.03 | fragment_342.0975 | : 0.01 |
| loss_55.0575      | : 0.03 | fragment_412.1775 | : 0.01 |
| fragment_149.0725 | : 0.03 | loss_176.0825     | : 0.01 |
| fragment_367.1325 | : 0.03 | fragment_368.1375 | : 0.01 |
| fragment_219.0675 | : 0.03 | fragment_231.0675 | : 0.01 |
| loss_193.1125     | : 0.02 | loss_192.1275     | : 0.01 |
| loss_55.0625      | : 0.02 | fragment_138.0525 | : 0.01 |
| fragment_353.1125 | : 0.02 | fragment_191.0725 | : 0.01 |
| fragment_121.0775 | : 0.02 | loss_178.0975     | : 0.01 |
| loss_56.0575      | : 0.02 | loss_68.0625      | : 0.01 |
| fragment_120.0425 | : 0.02 | fragment_267.0625 | : 0.01 |
| fragment_337.0725 | : 0.01 | fragment_150.0775 | : 0.01 |
| fragment_119.0625 | : 0.01 | loss_35.0375      | : 0.01 |
| fragment_356.1125 | : 0.01 |                   |        |
| fragment_110.0625 | : 0.01 |                   |        |
| fragment_97.0275  | : 0.01 |                   |        |
| fragment_108.0425 | : 0.01 |                   |        |
| fragment_410.1225 | : 0.01 |                   |        |
| fragment_381.1475 | : 0.01 |                   |        |

motif\_668

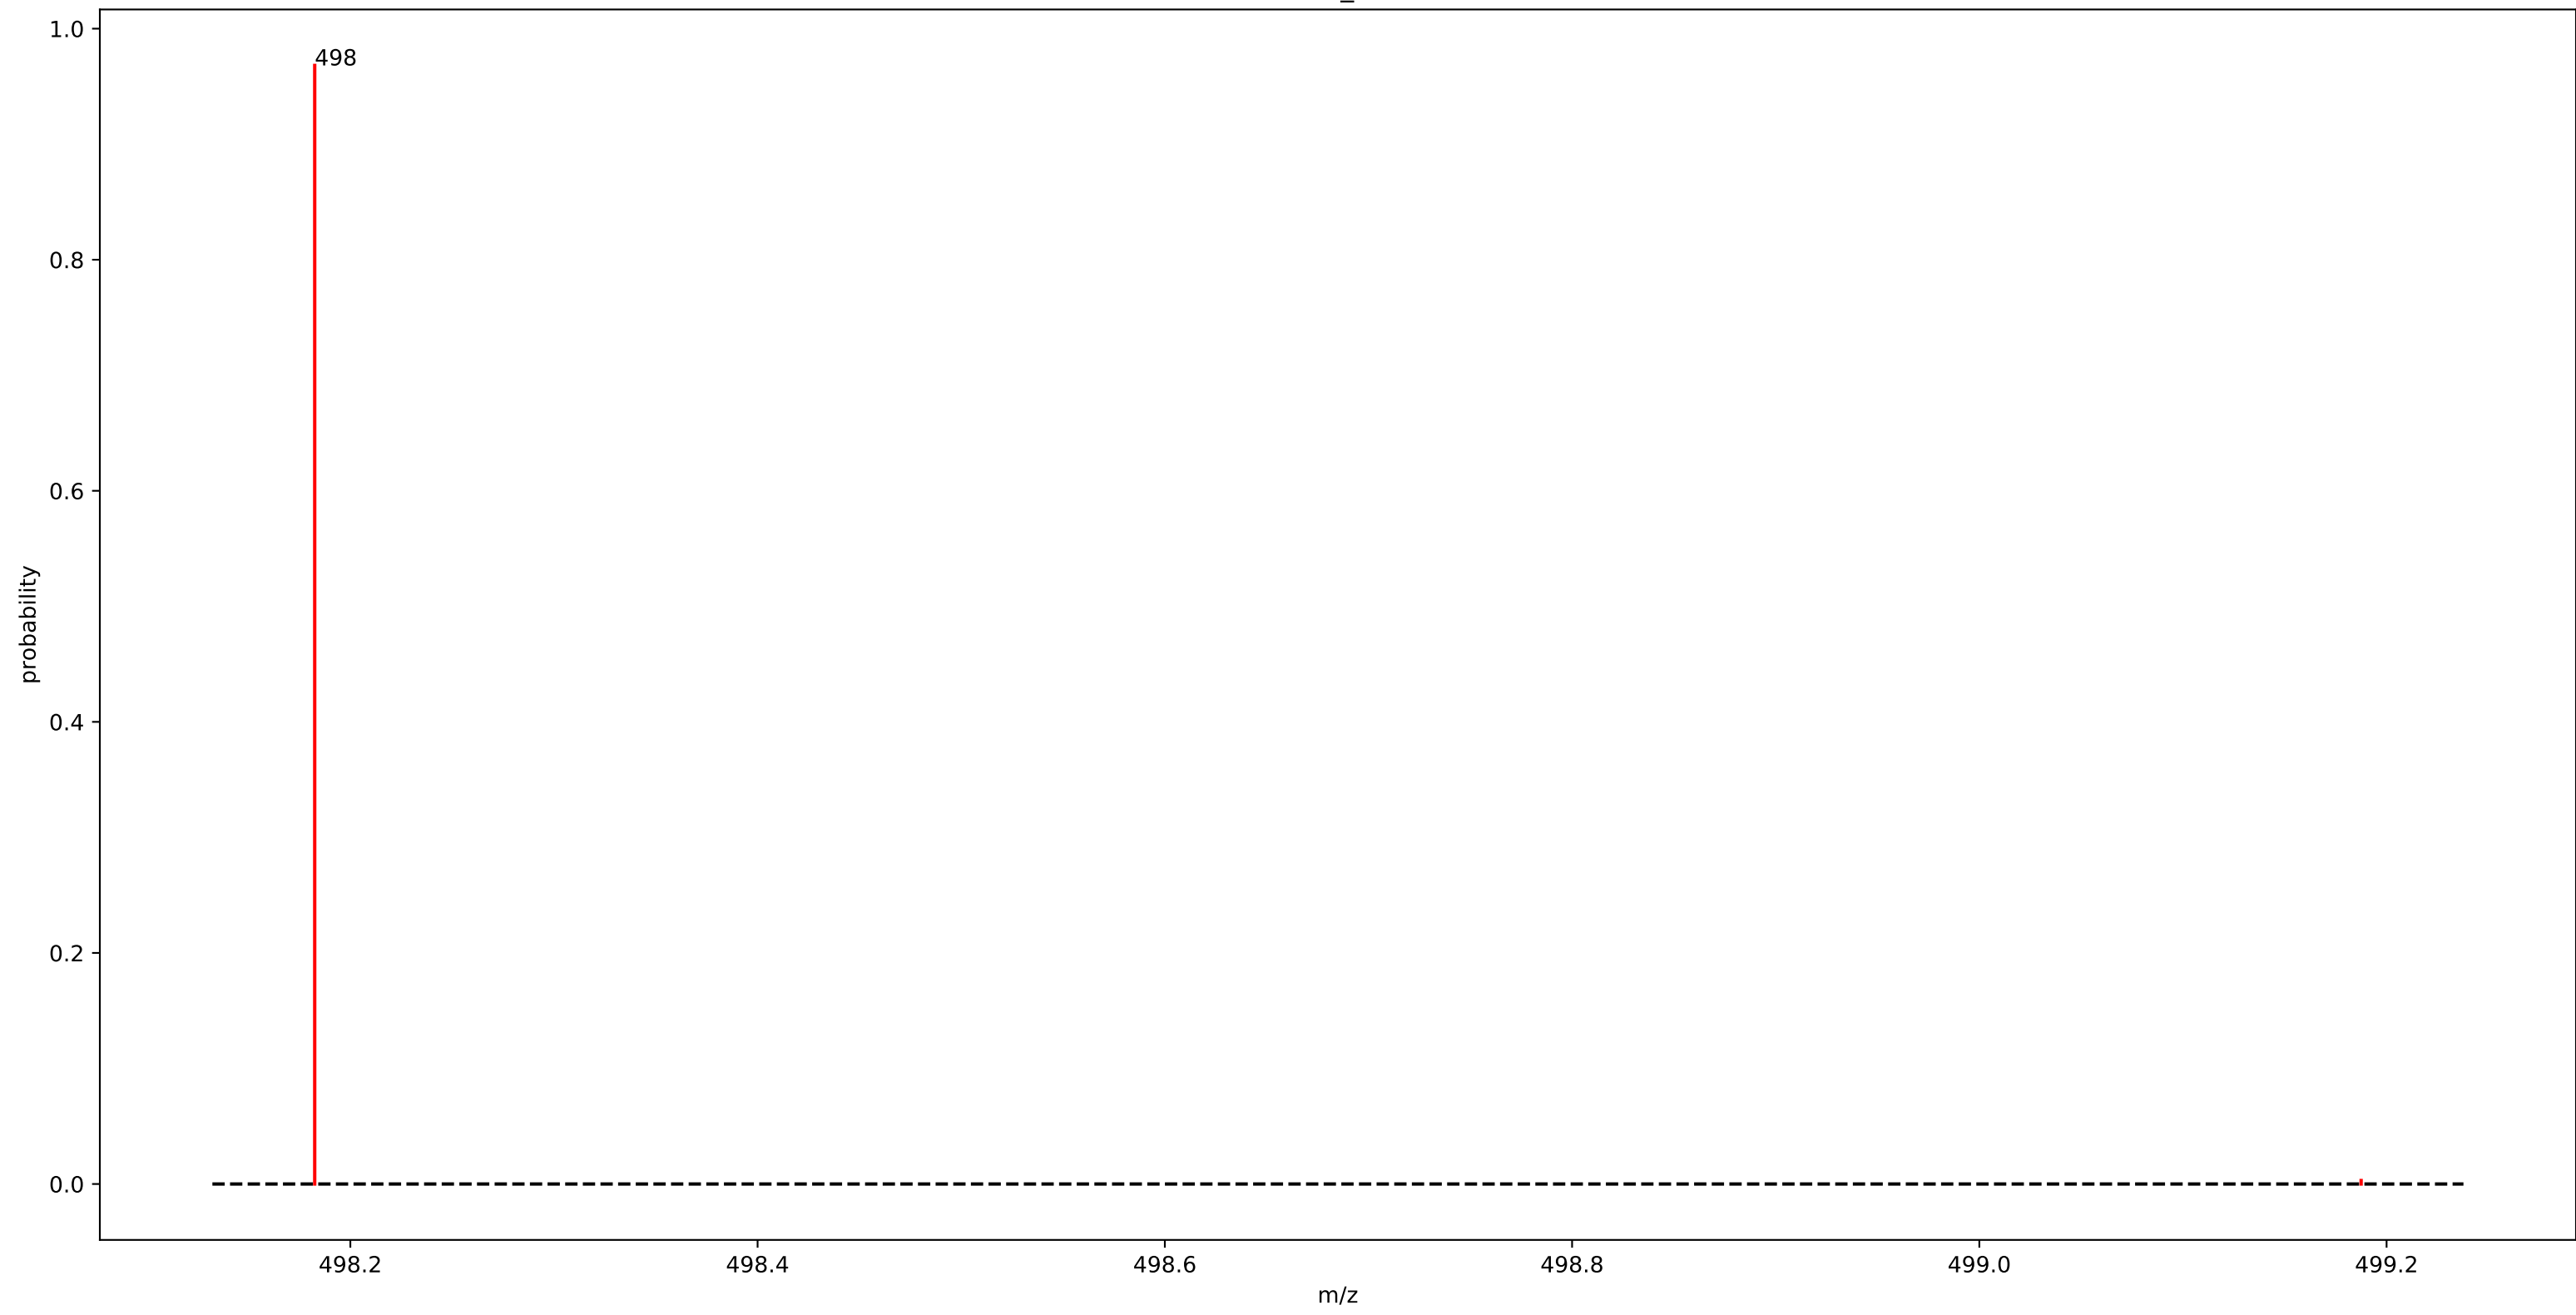

## motif\_668

fragment\_498.1825 : 0.97

StrepSalini\_motif\_105.m2m

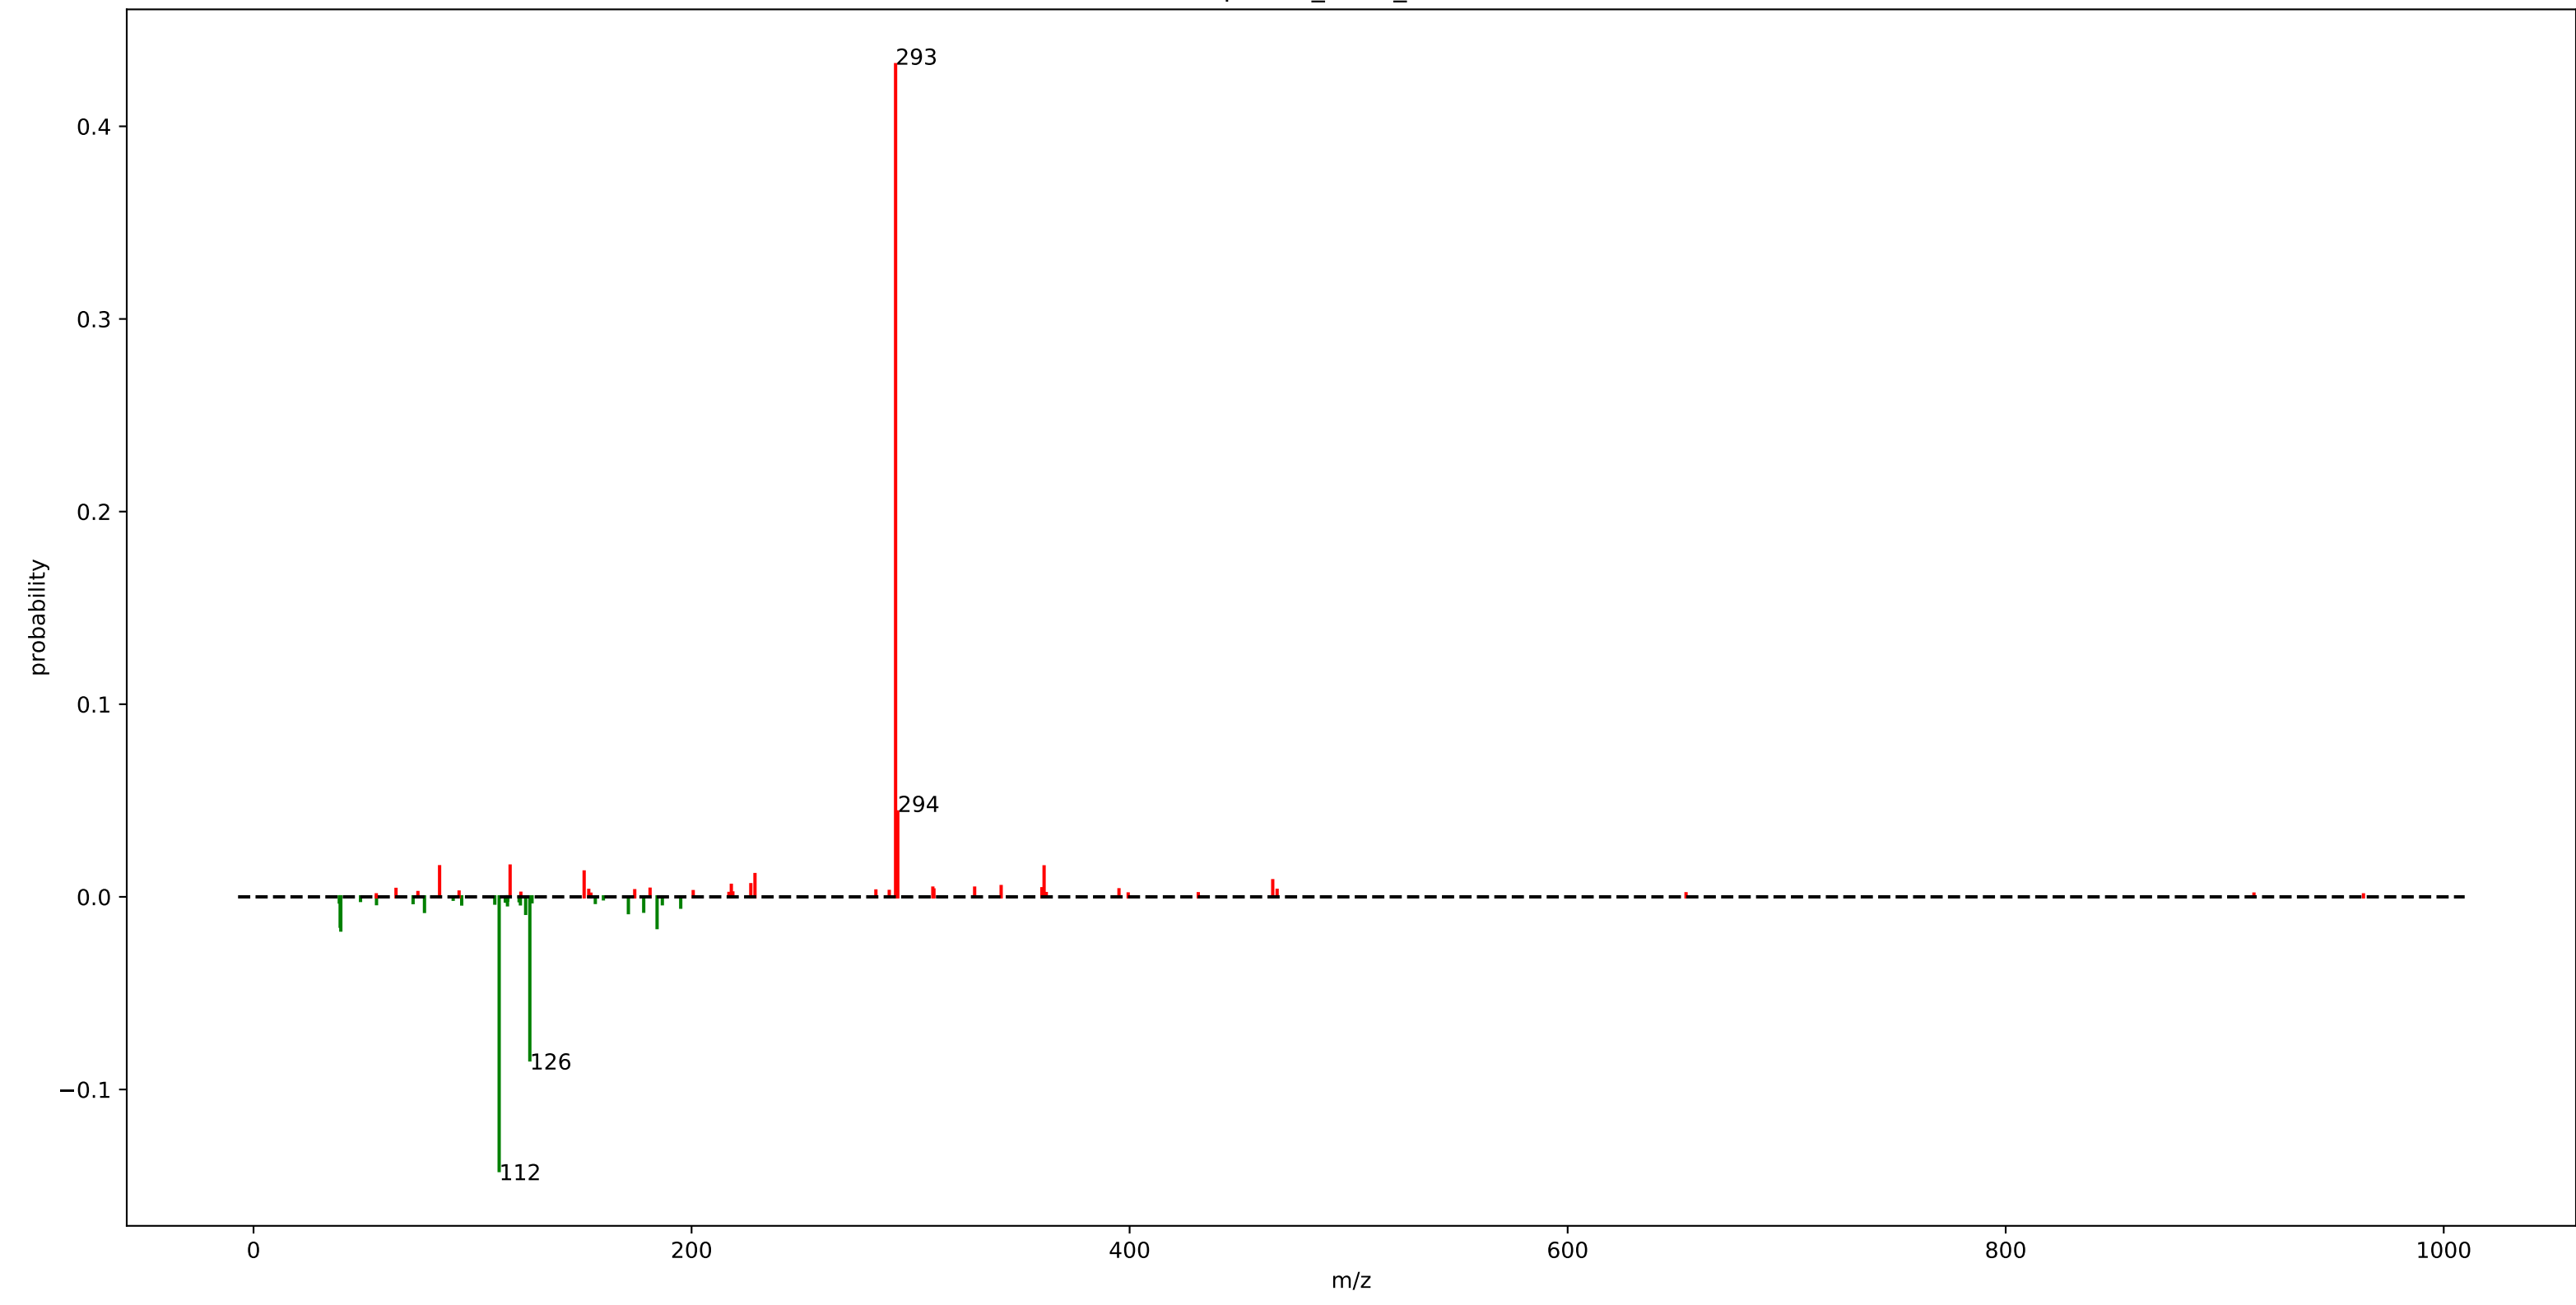

# StrepSalini\_motif\_105.m2m

|                   |        |                   |        |
|-------------------|--------|-------------------|--------|
| fragment_293.1500 | : 0.43 | fragment_341.3500 | : 0.01 |
| loss_112.1500     | : 0.14 |                   |        |
| loss_126.1525     | : 0.08 |                   |        |
| fragment_294.1500 | : 0.04 |                   |        |
| loss_39.8500      | : 0.02 |                   |        |
| fragment_117.1500 | : 0.02 |                   |        |
| loss_184.2525     | : 0.02 |                   |        |
| fragment_84.9500  | : 0.02 |                   |        |
| fragment_360.9500 | : 0.02 |                   |        |
| loss_39.5500      | : 0.02 |                   |        |
| fragment_150.9500 | : 0.01 |                   |        |
| fragment_228.9500 | : 0.01 |                   |        |
| loss_124.2500     | : 0.01 |                   |        |
| fragment_465.3500 | : 0.01 |                   |        |
| loss_171.1500     | : 0.01 |                   |        |
| loss_78.0500      | : 0.01 |                   |        |
| loss_178.1500     | : 0.01 |                   |        |
| fragment_227.0500 | : 0.01 |                   |        |
| fragment_218.1500 | : 0.01 |                   |        |
| loss_195.0525     | : 0.01 |                   |        |

rhabdus\_motif\_295.m2m

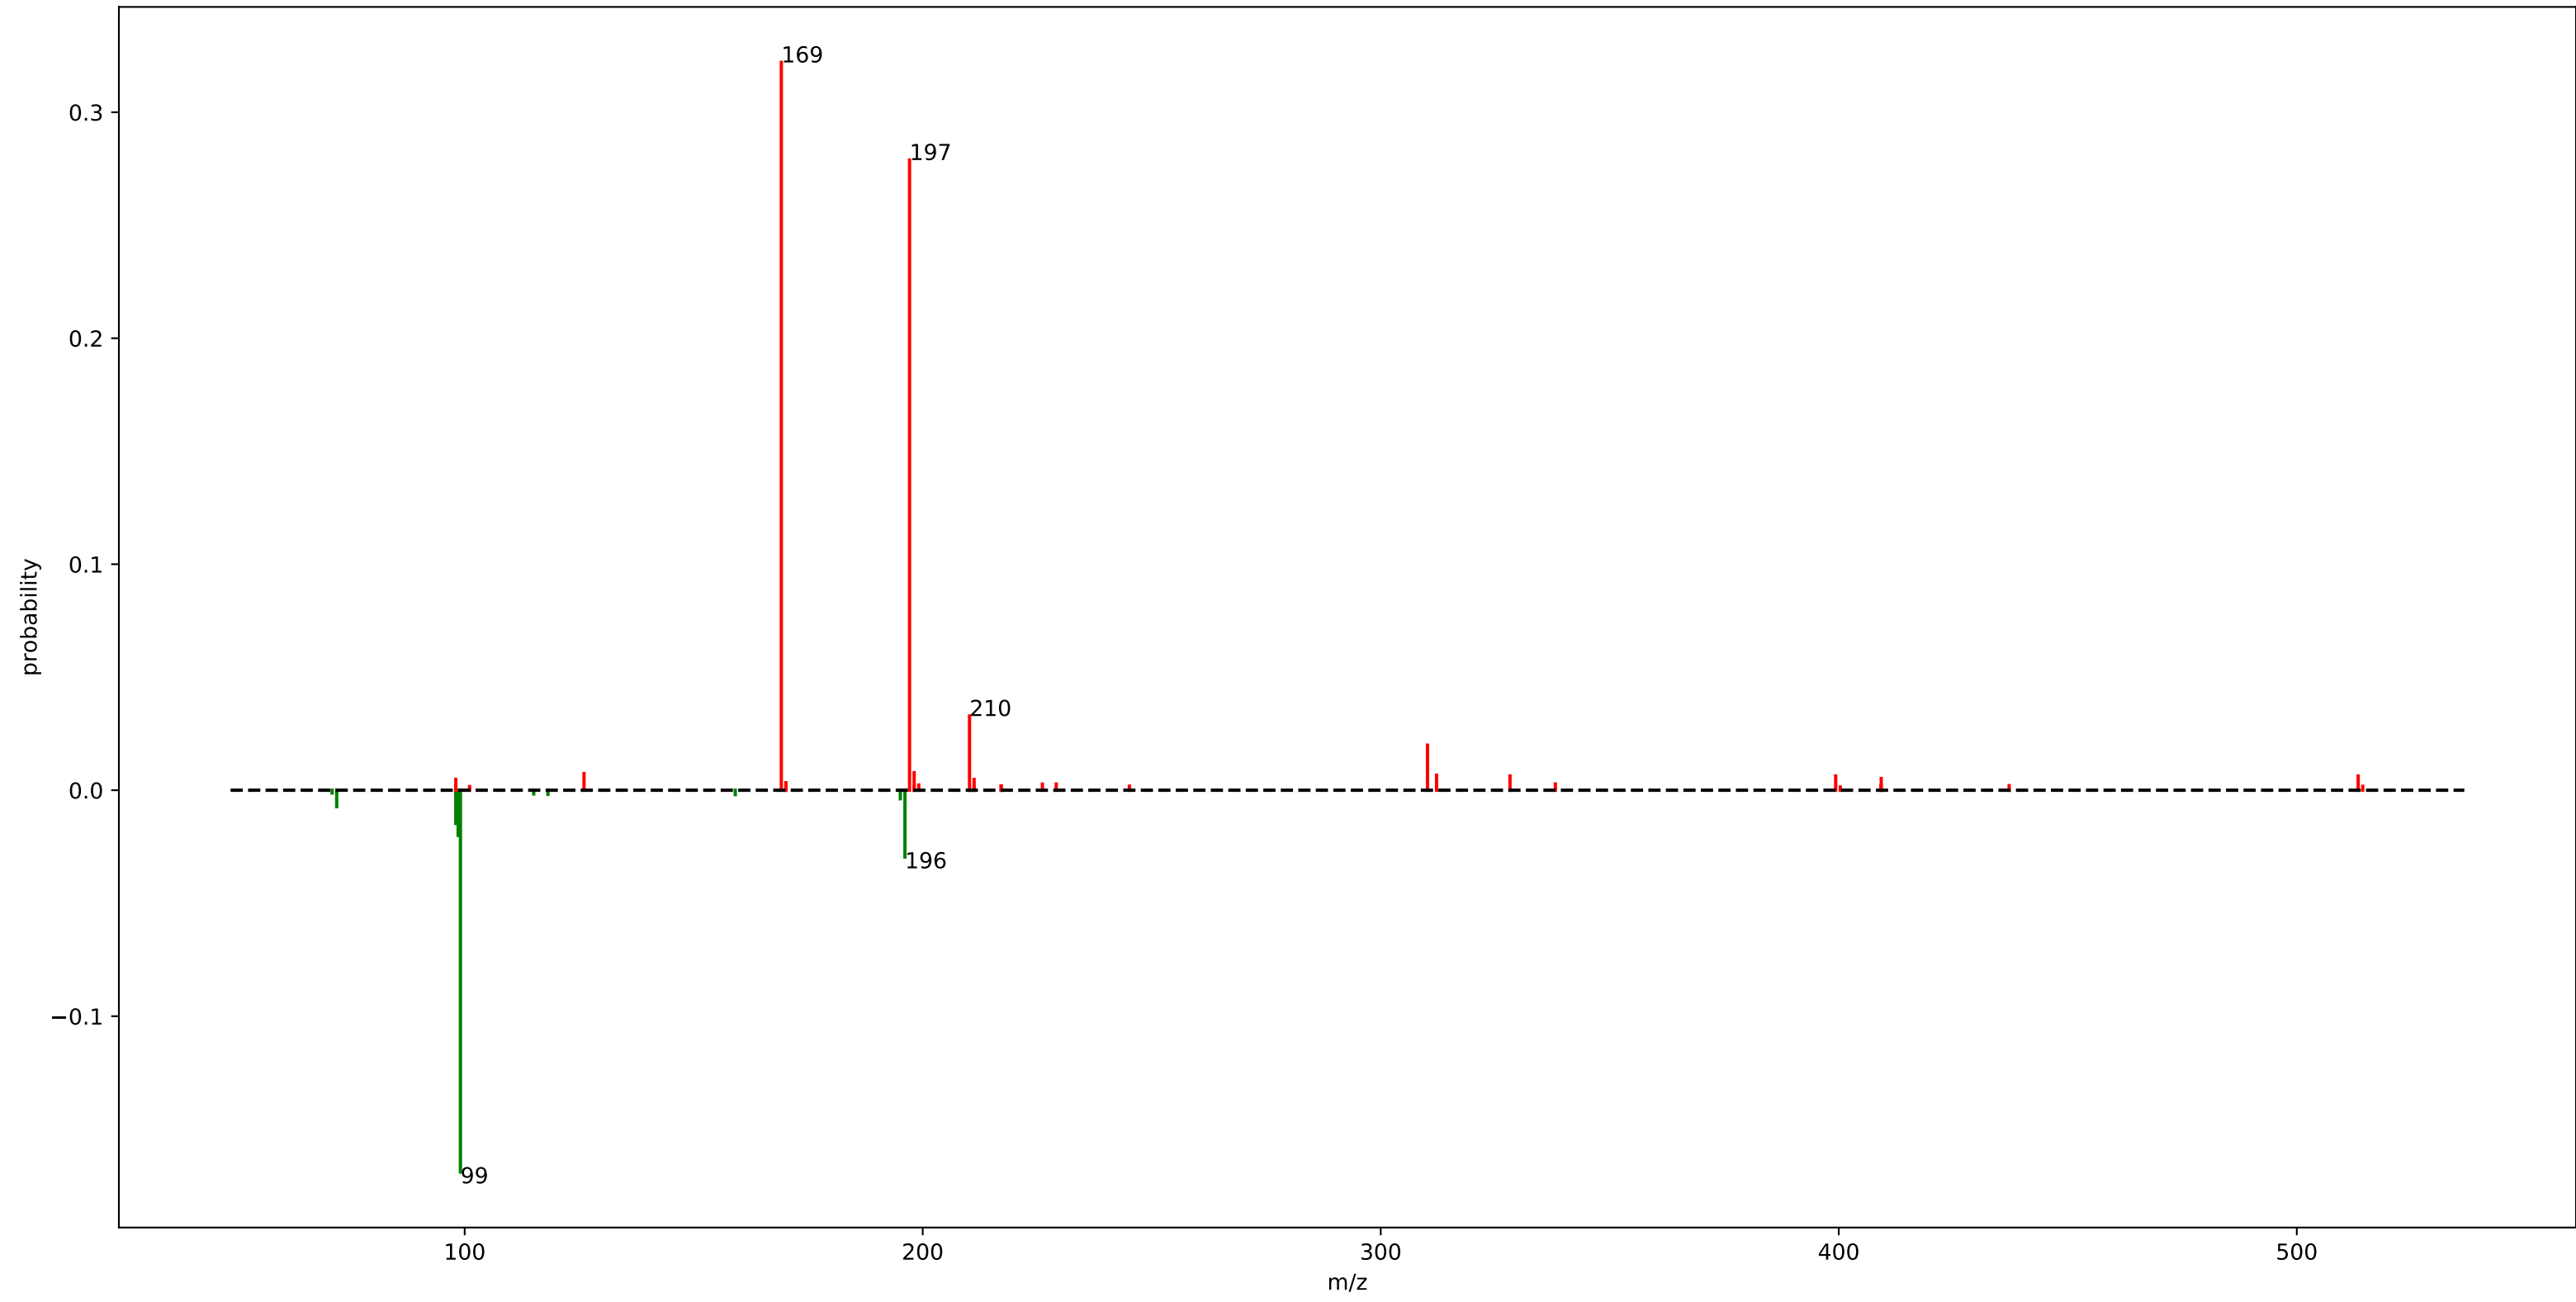

## rhabdus\_motif\_295.m2m

|                   |        |
|-------------------|--------|
| fragment_169.1325 | : 0.32 |
| fragment_197.1275 | : 0.28 |
| loss_99.0675      | : 0.17 |
| fragment_210.2225 | : 0.03 |
| loss_196.1225     | : 0.03 |
| loss_98.5675      | : 0.02 |
| fragment_310.2125 | : 0.02 |
| loss_98.0625      | : 0.01 |
| fragment_198.1325 | : 0.01 |
| fragment_126.0525 | : 0.01 |
| loss_72.0575      | : 0.01 |
| fragment_312.1925 | : 0.01 |
| fragment_513.4125 | : 0.01 |
| fragment_399.3275 | : 0.01 |
| fragment_328.2225 | : 0.01 |
| loss_98.0675      | : 0.01 |
| fragment_409.2775 | : 0.01 |



euphorbia\_motif\_400.m2m

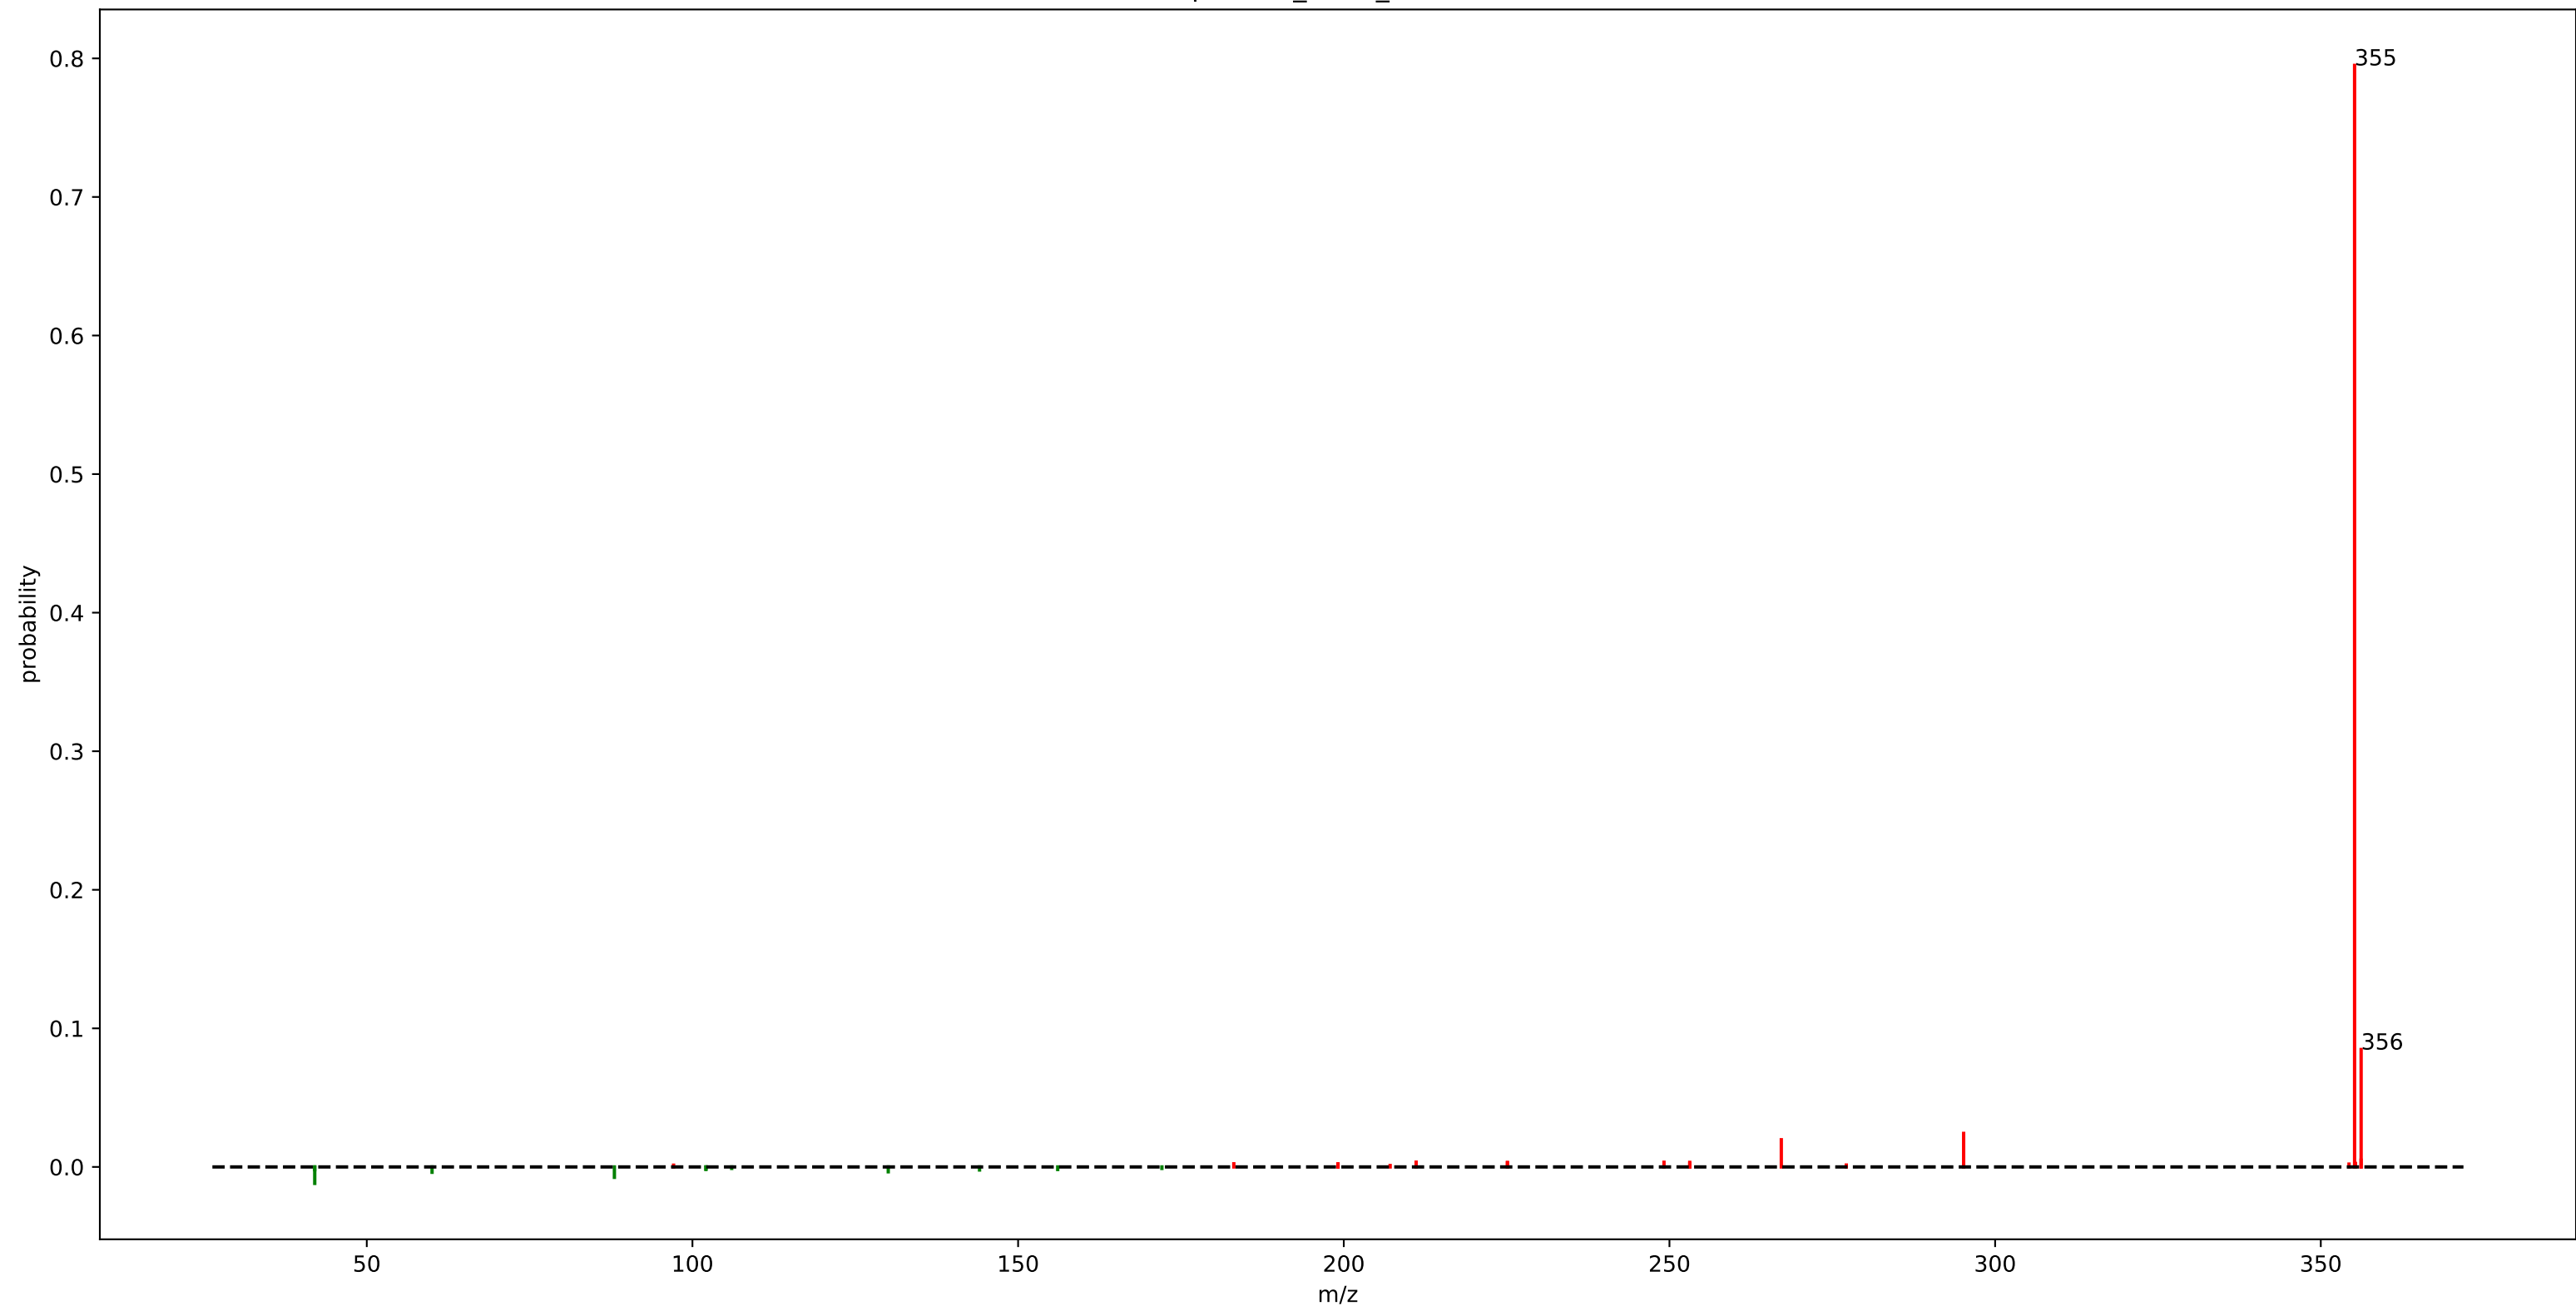

# euphorbia\_motif\_400.m2m

|                   |        |
|-------------------|--------|
| fragment_355.1875 | : 0.79 |
| fragment_356.1925 | : 0.08 |
| fragment_295.1675 | : 0.02 |
| fragment_267.1725 | : 0.02 |
| loss_42.0125      | : 0.01 |
| loss_88.0175      | : 0.01 |

urine\_mass2motif\_220.m2m

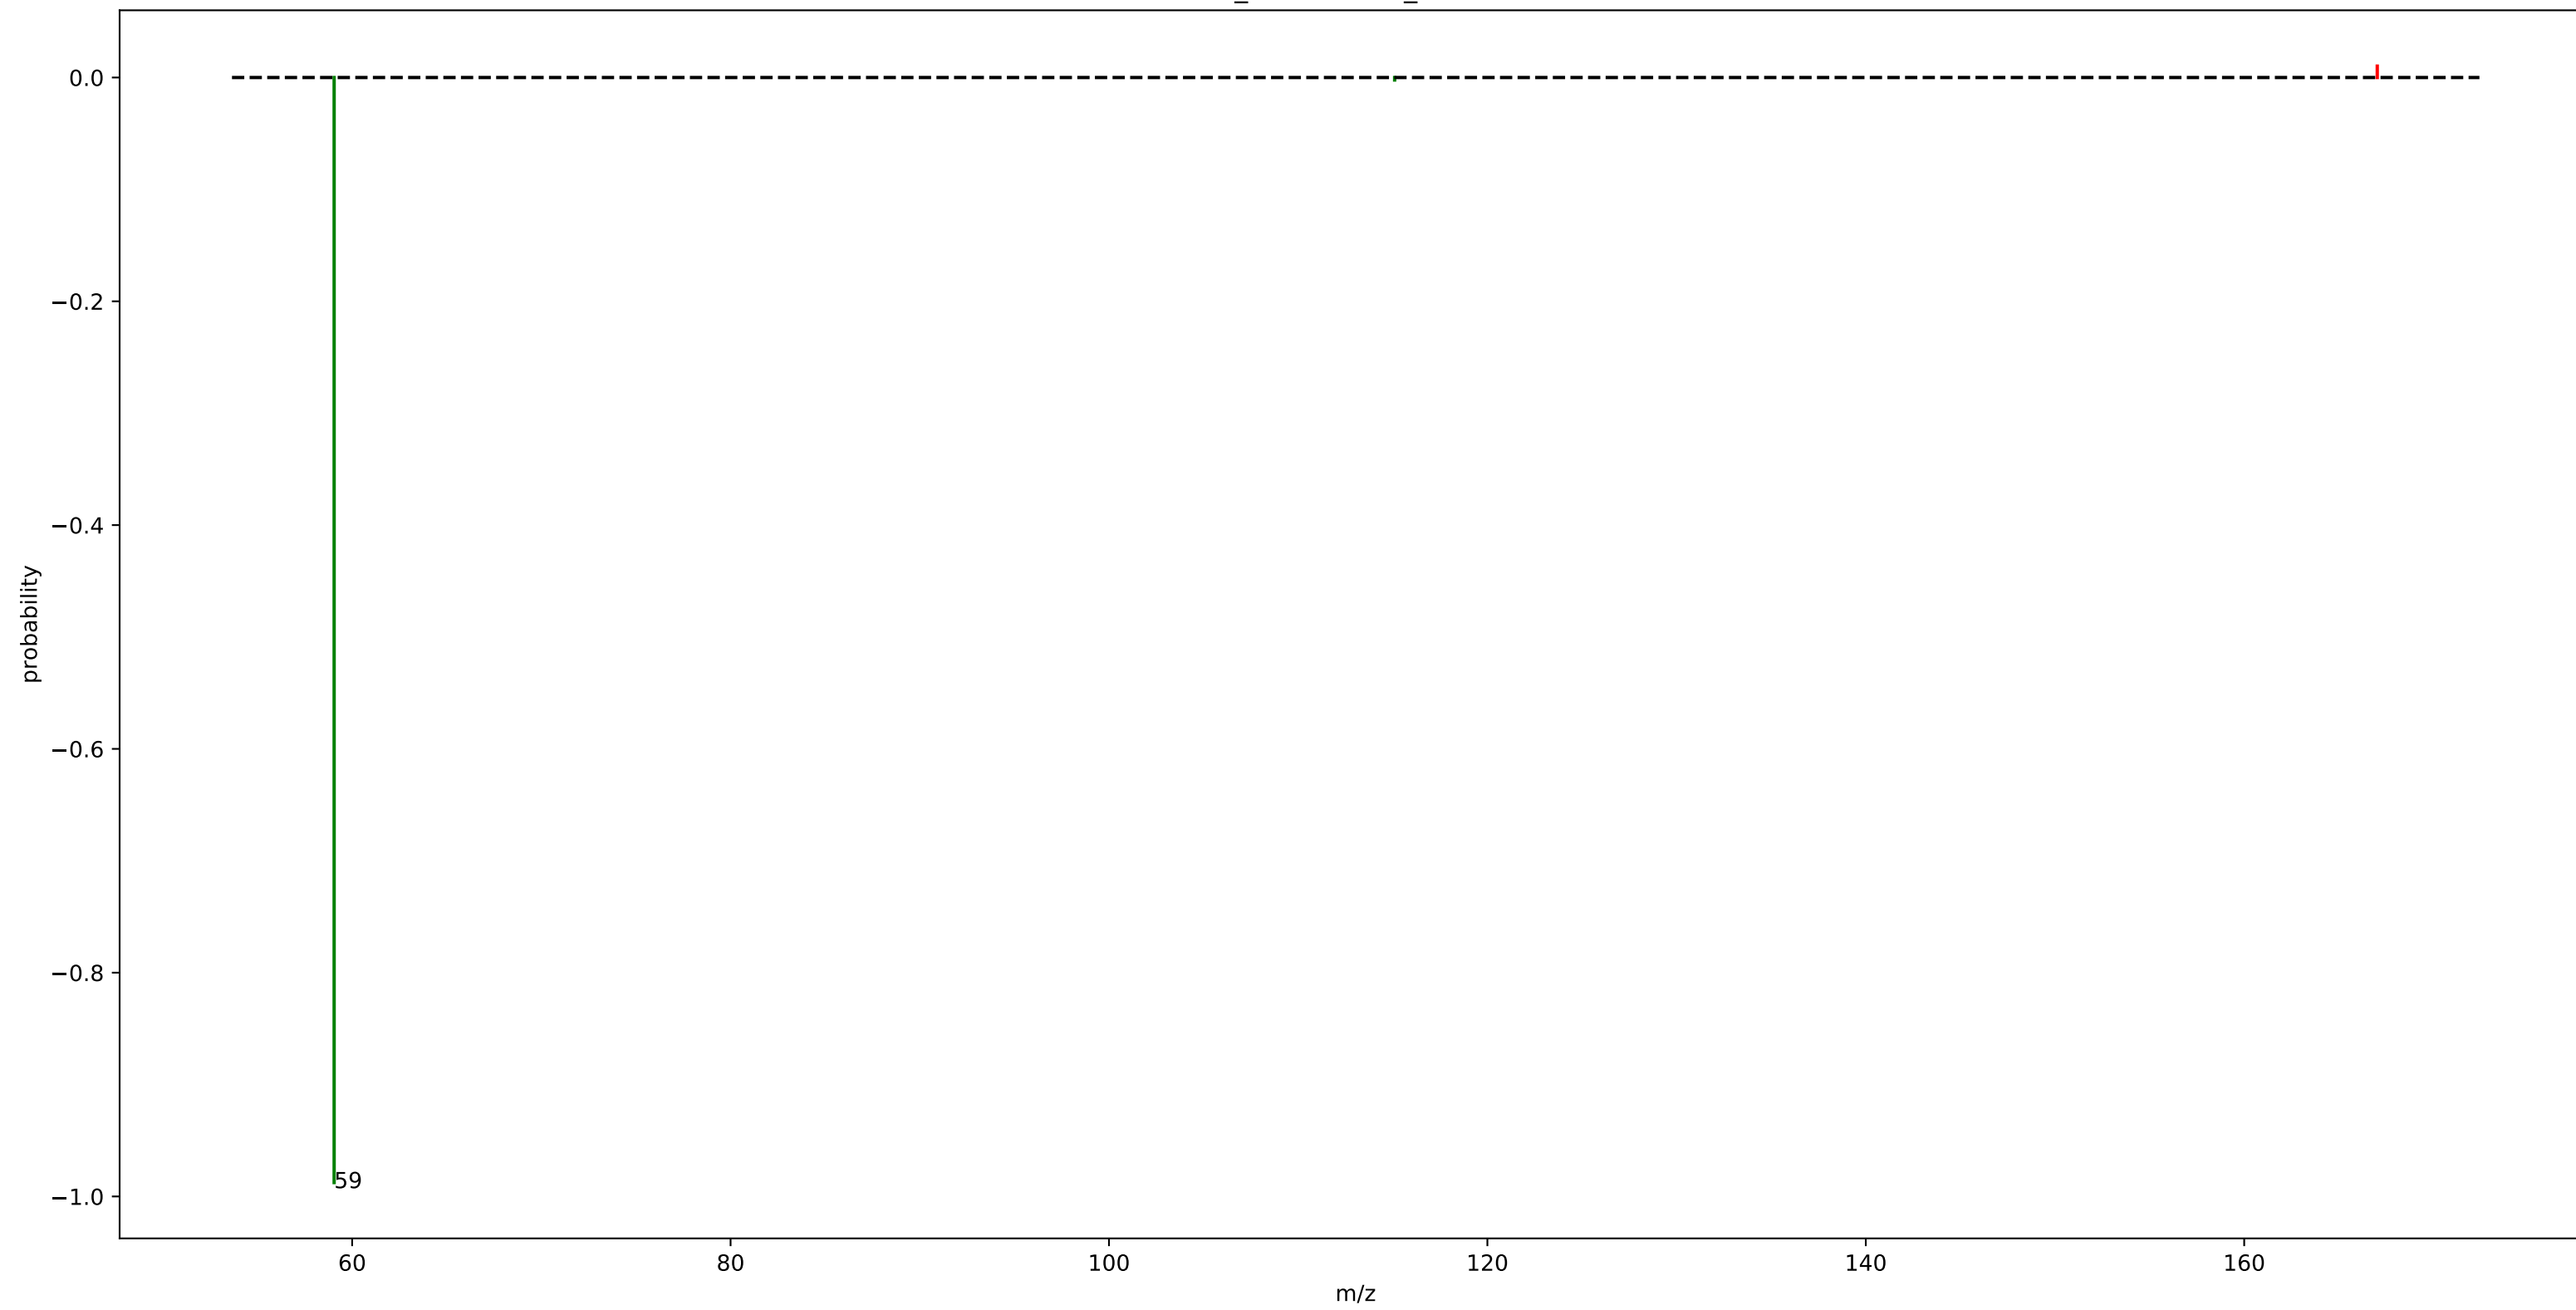

# urine\_mass2motif\_220.m2m

loss\_59.0475 : 0.99  
fragment\_167.0325 : 0.01

motif\_389

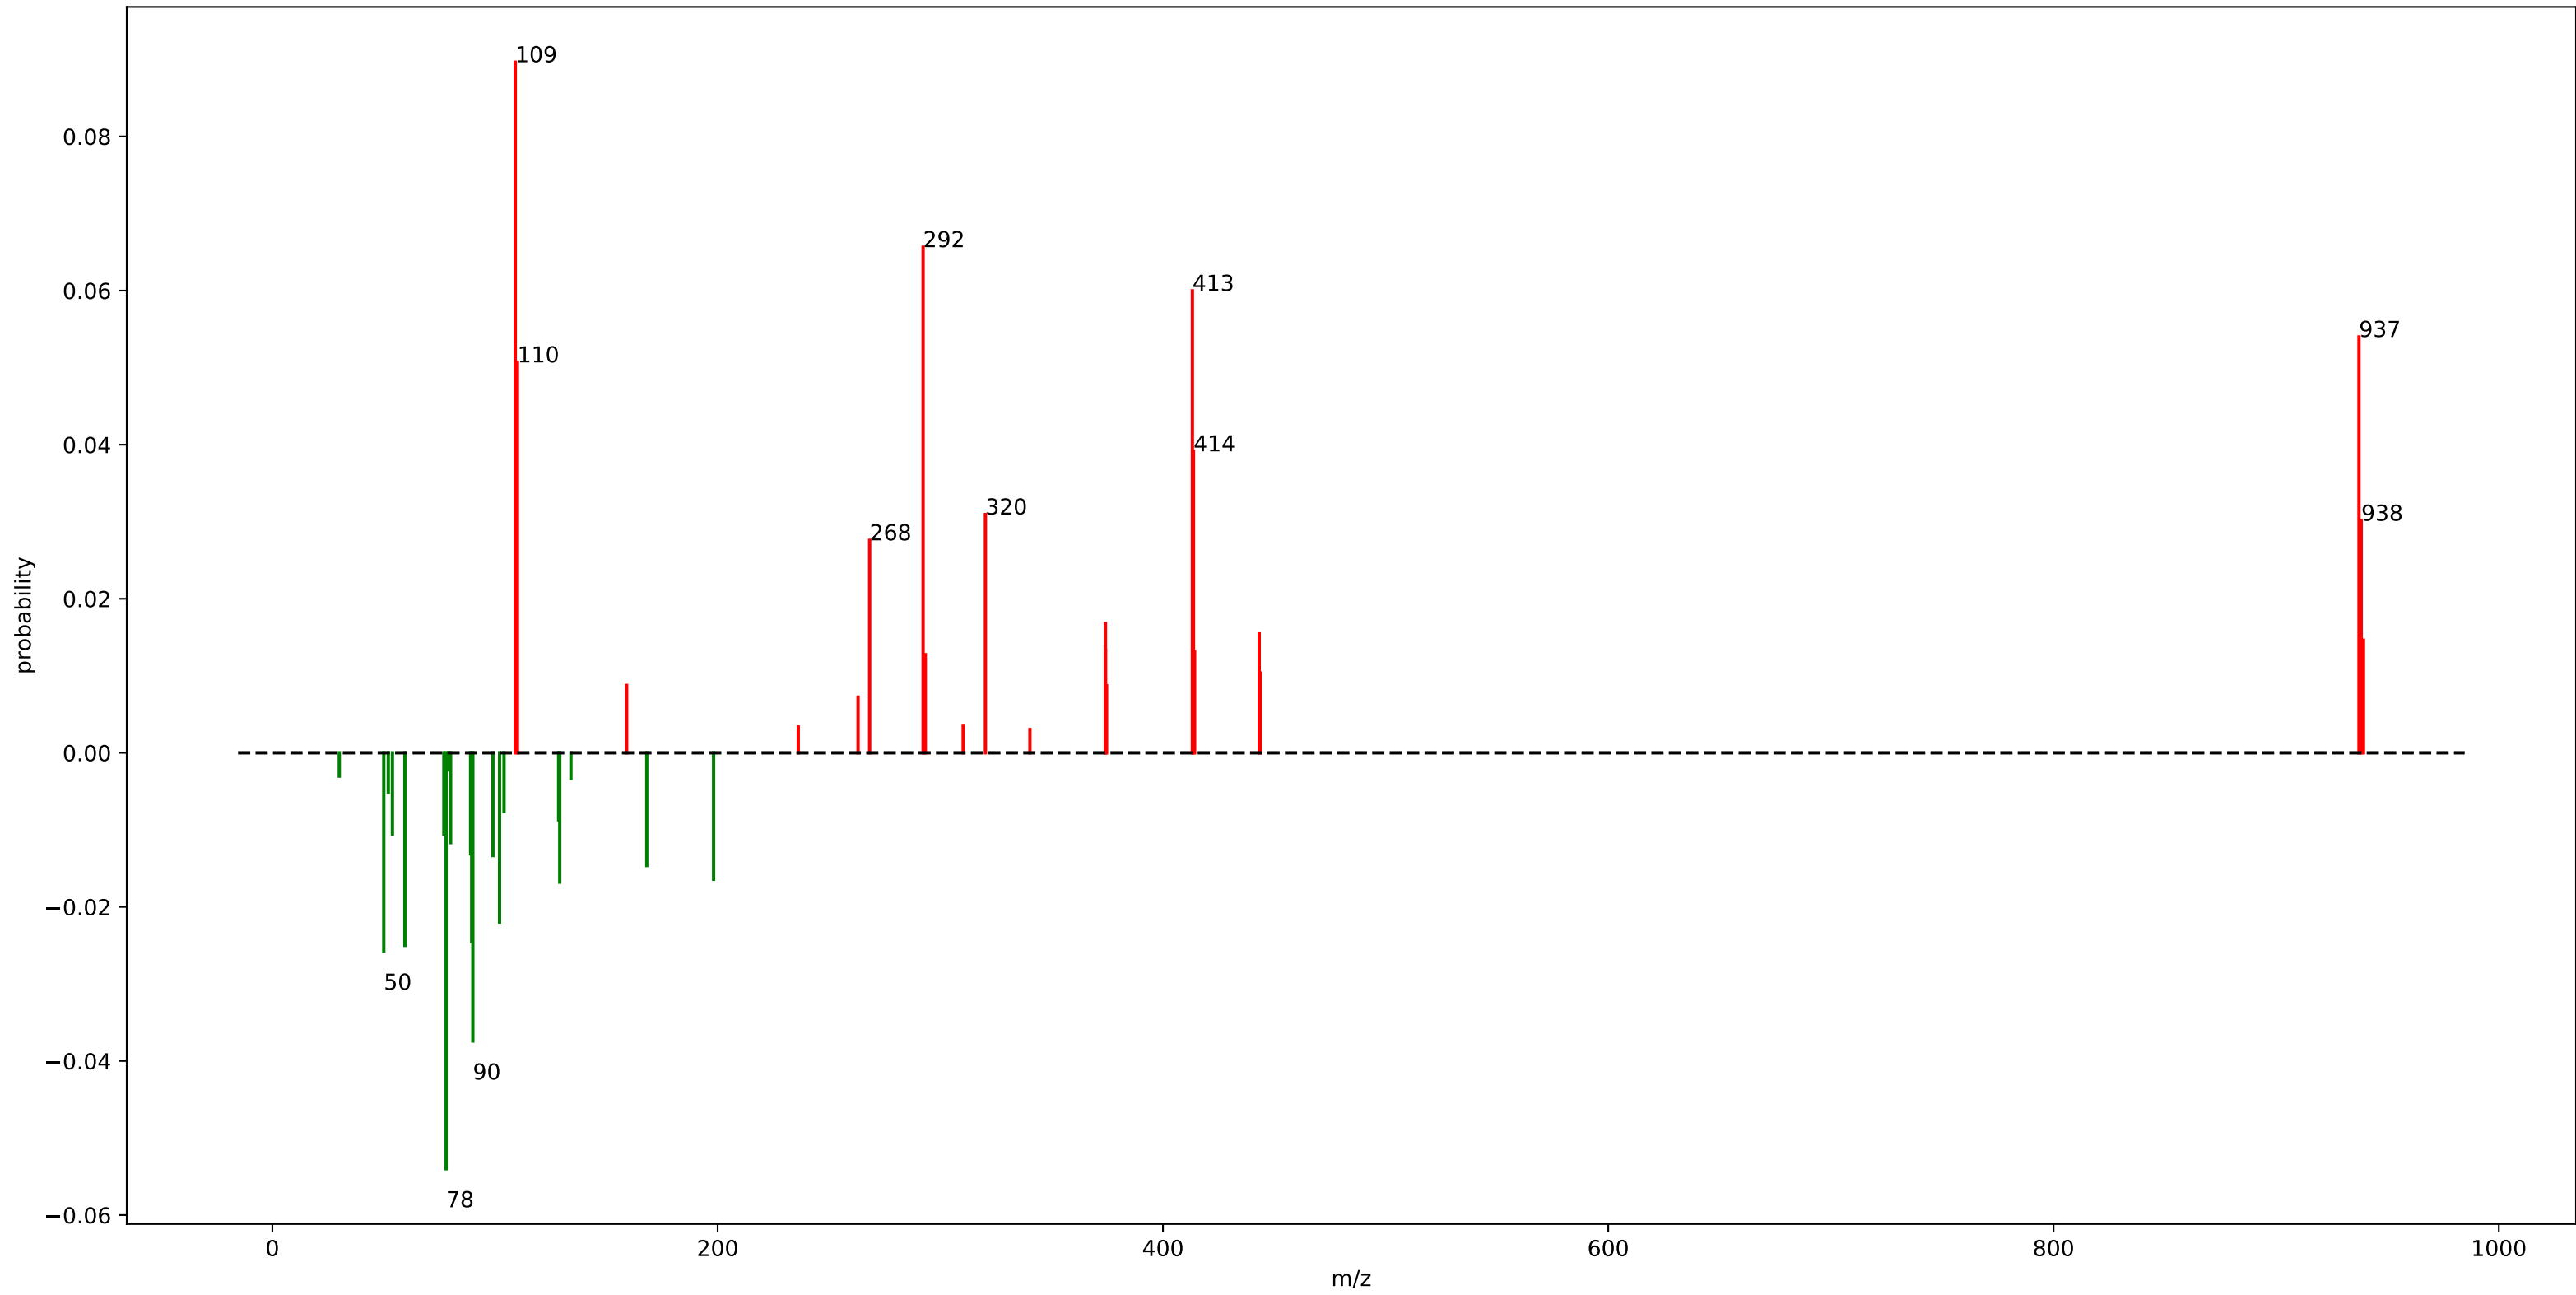

## motif\_389

|                   |        |                   |        |
|-------------------|--------|-------------------|--------|
| fragment_109.0975 | : 0.09 | loss_168.1625     | : 0.01 |
| fragment_292.2625 | : 0.07 | loss_99.0575      | : 0.01 |
| fragment_413.2175 | : 0.06 | fragment_374.1775 | : 0.01 |
| fragment_937.1975 | : 0.05 | fragment_414.2175 | : 0.01 |
| loss_78.0275      | : 0.05 | loss_89.0275      | : 0.01 |
| fragment_110.0575 | : 0.05 | fragment_293.2675 | : 0.01 |
| fragment_413.7175 | : 0.04 | loss_80.0475      | : 0.01 |
| loss_90.0325      | : 0.04 | loss_53.9075      | : 0.01 |
| fragment_320.2575 | : 0.03 | loss_77.0275      | : 0.01 |
| fragment_938.2025 | : 0.03 | fragment_443.7275 | : 0.01 |
| fragment_268.2625 | : 0.03 | fragment_159.1175 | : 0.01 |
| loss_50.0375      | : 0.03 | fragment_374.6775 | : 0.01 |
| loss_59.5175      | : 0.02 | loss_128.5725     | : 0.01 |
| loss_89.5275      | : 0.02 | loss_104.0475     | : 0.01 |
| loss_102.0325     | : 0.02 | fragment_263.0625 | : 0.01 |
| fragment_374.1725 | : 0.02 | loss_52.0525      | : 0.01 |
| loss_129.0725     | : 0.02 |                   |        |
| loss_198.1775     | : 0.02 |                   |        |
| fragment_443.2275 | : 0.02 |                   |        |
| fragment_939.2025 | : 0.01 |                   |        |

motif\_505

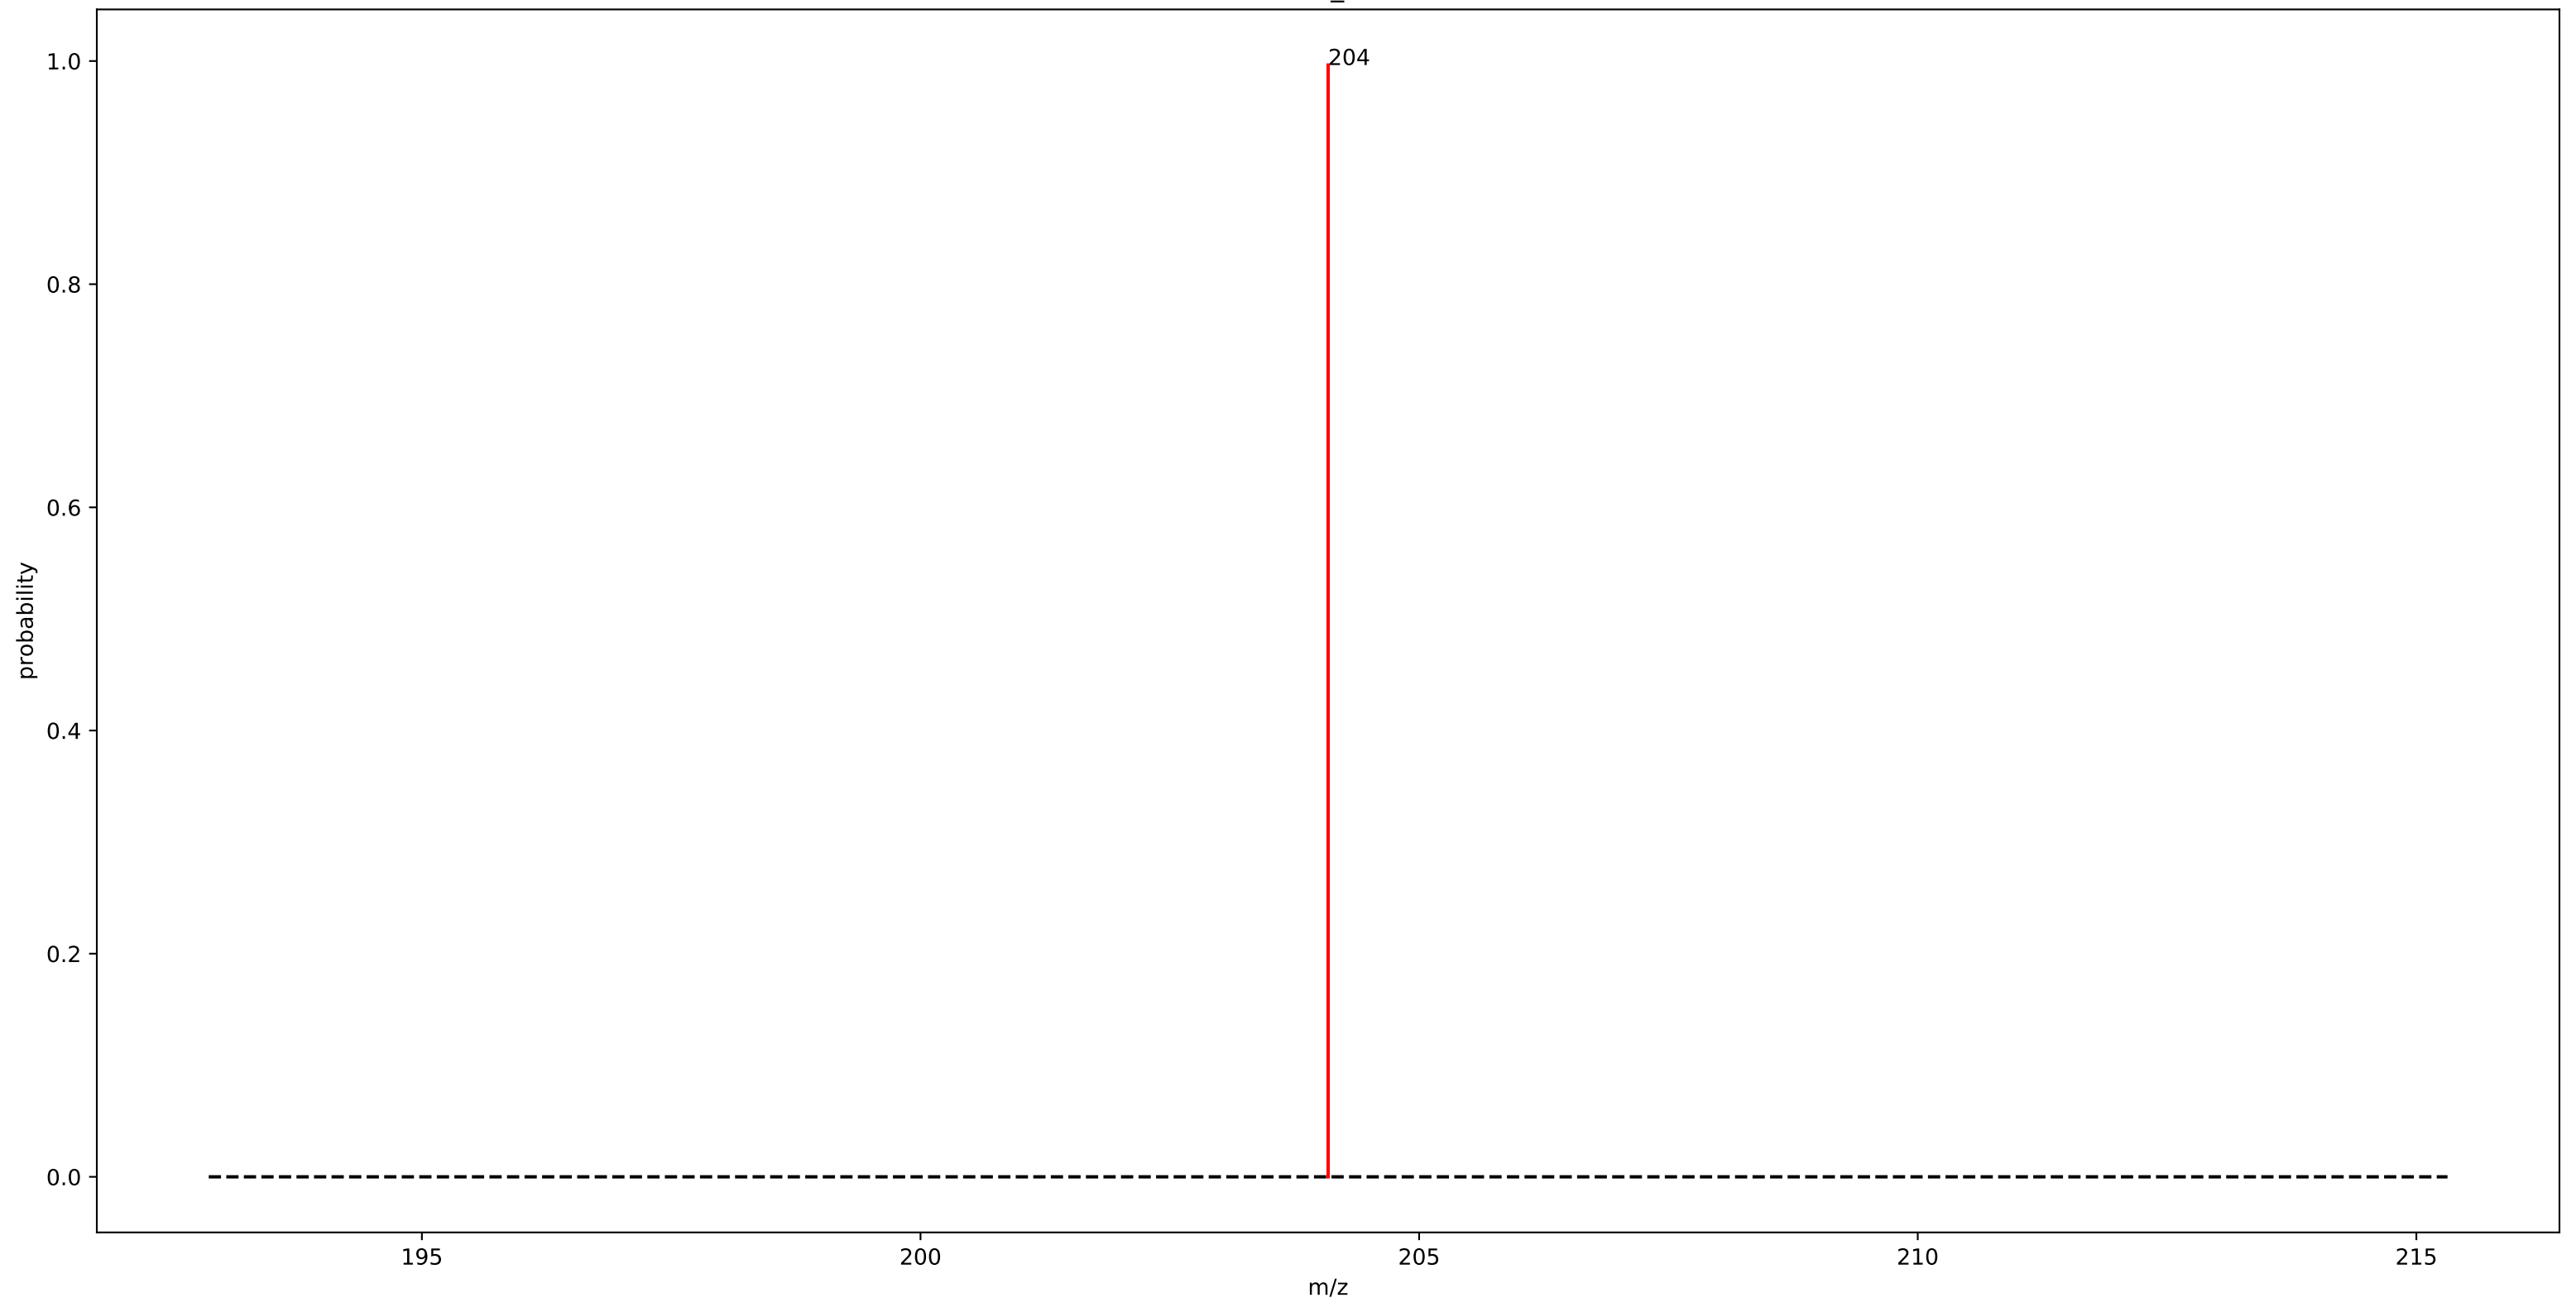

# motif\_505

fragment\_204.0875 : 1.00



gnps\_motif\_57.m2m

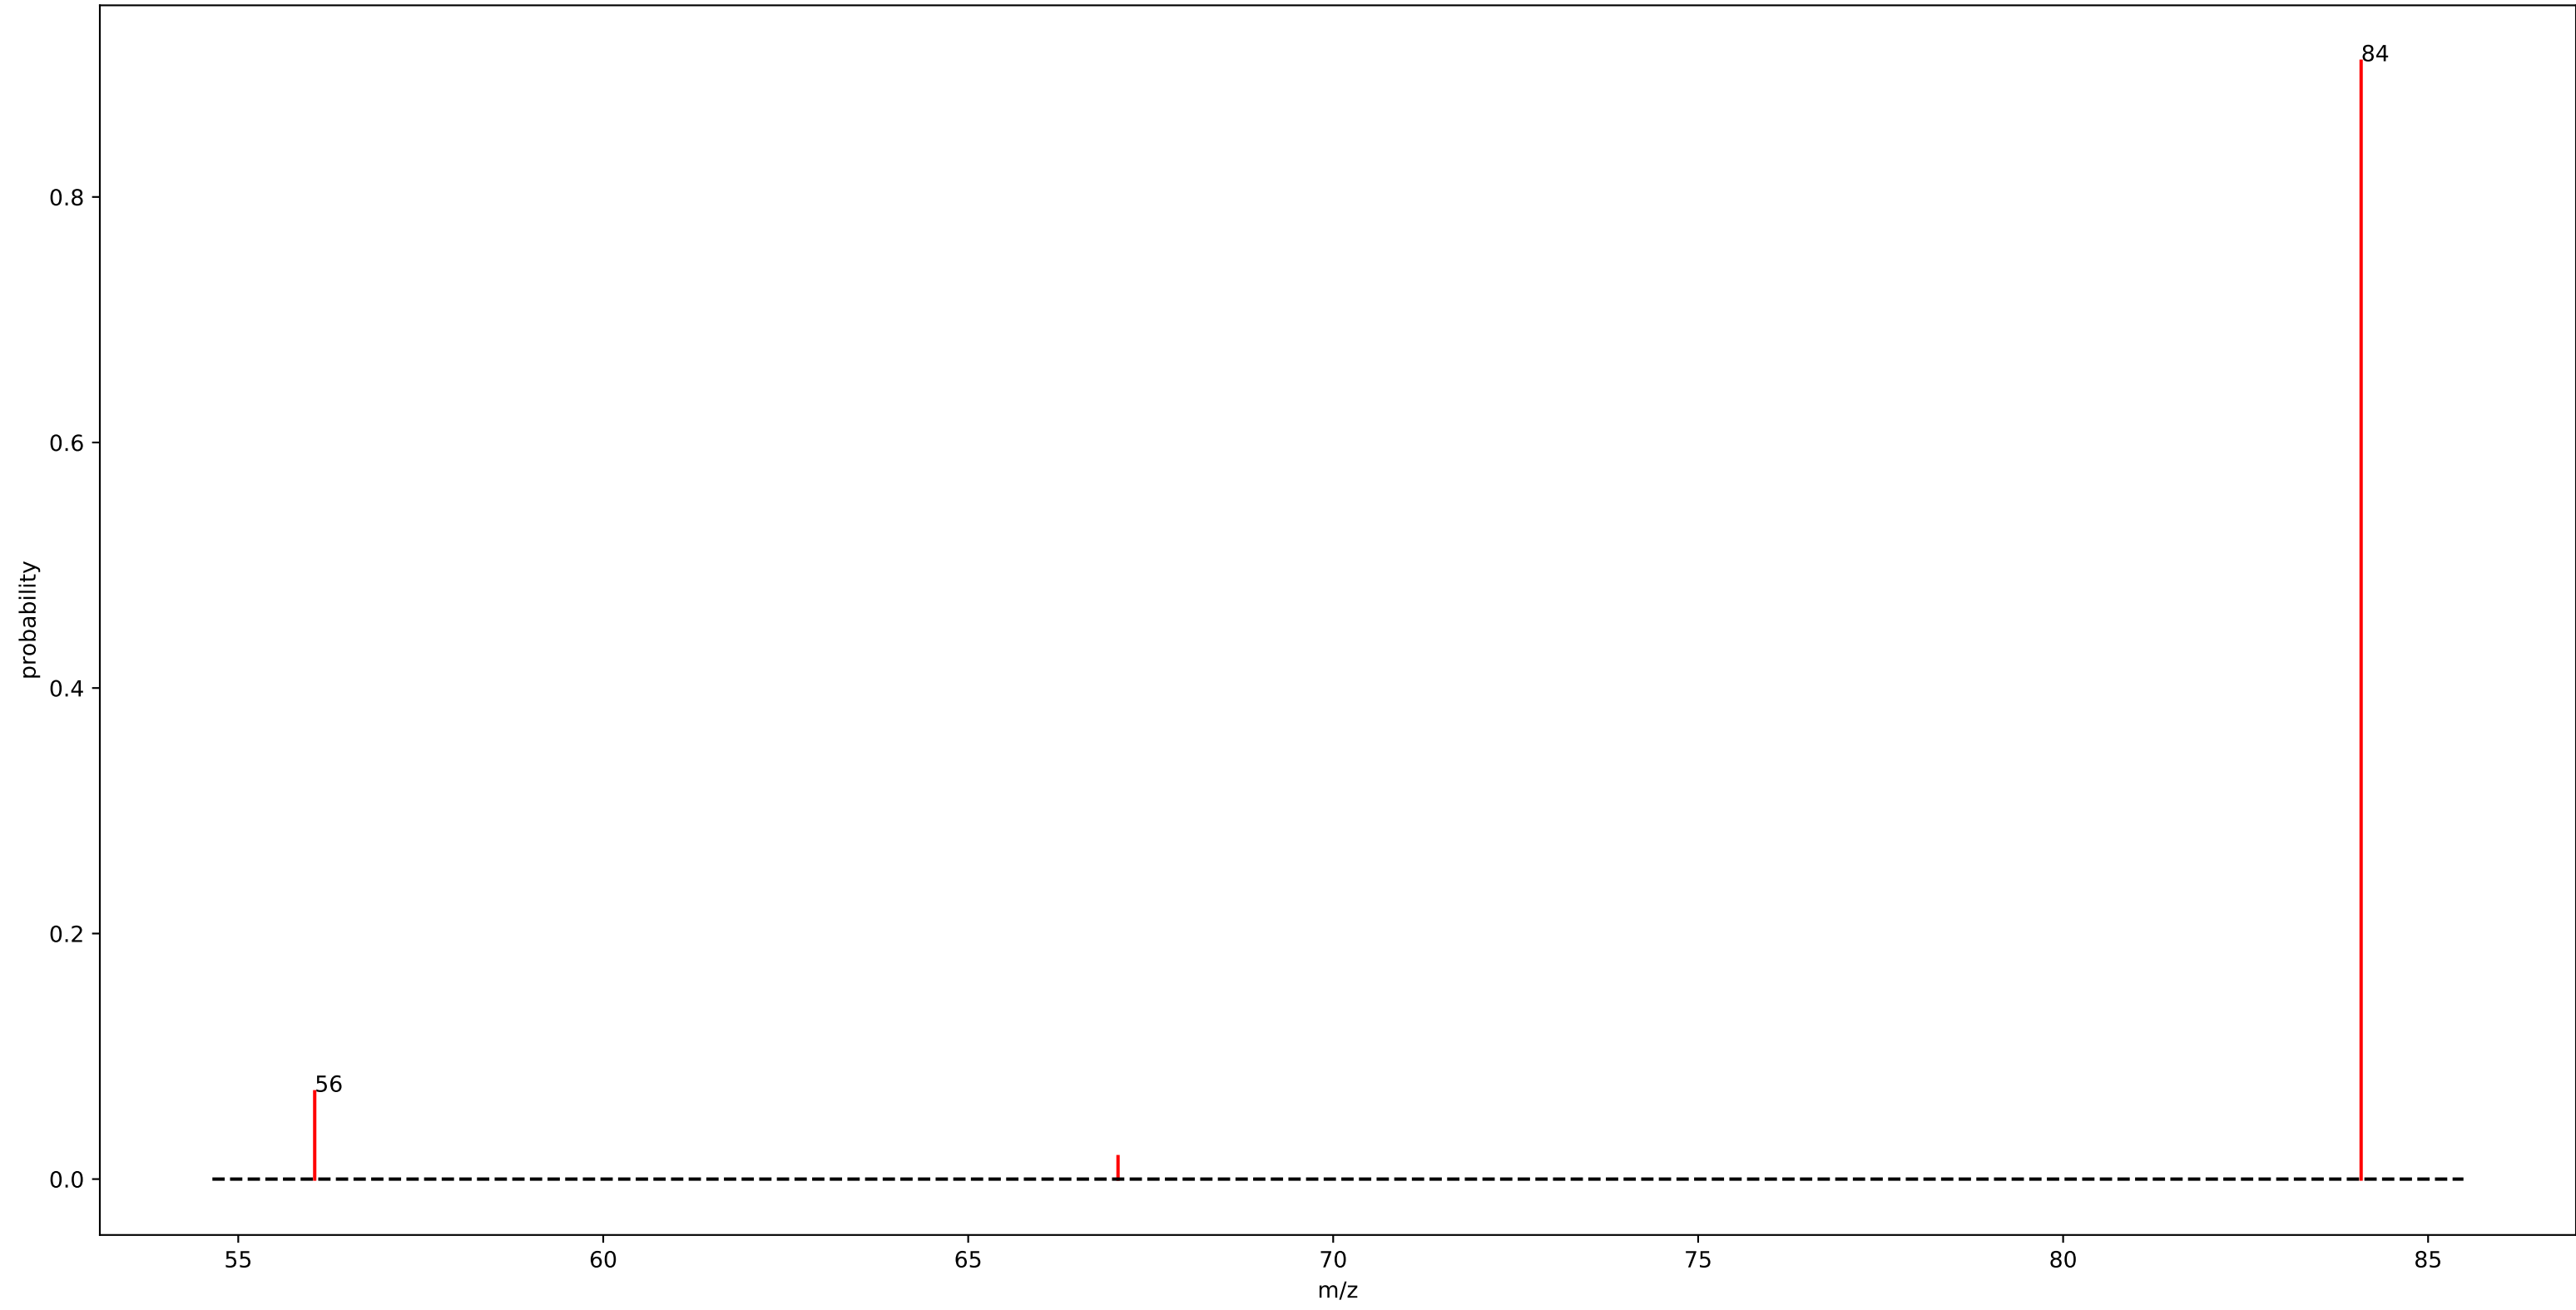

## gnps\_motif\_57.m2m

|                  |        |
|------------------|--------|
| fragment_84.0825 | : 0.91 |
| fragment_56.0475 | : 0.07 |
| fragment_67.0525 | : 0.02 |

motif\_507

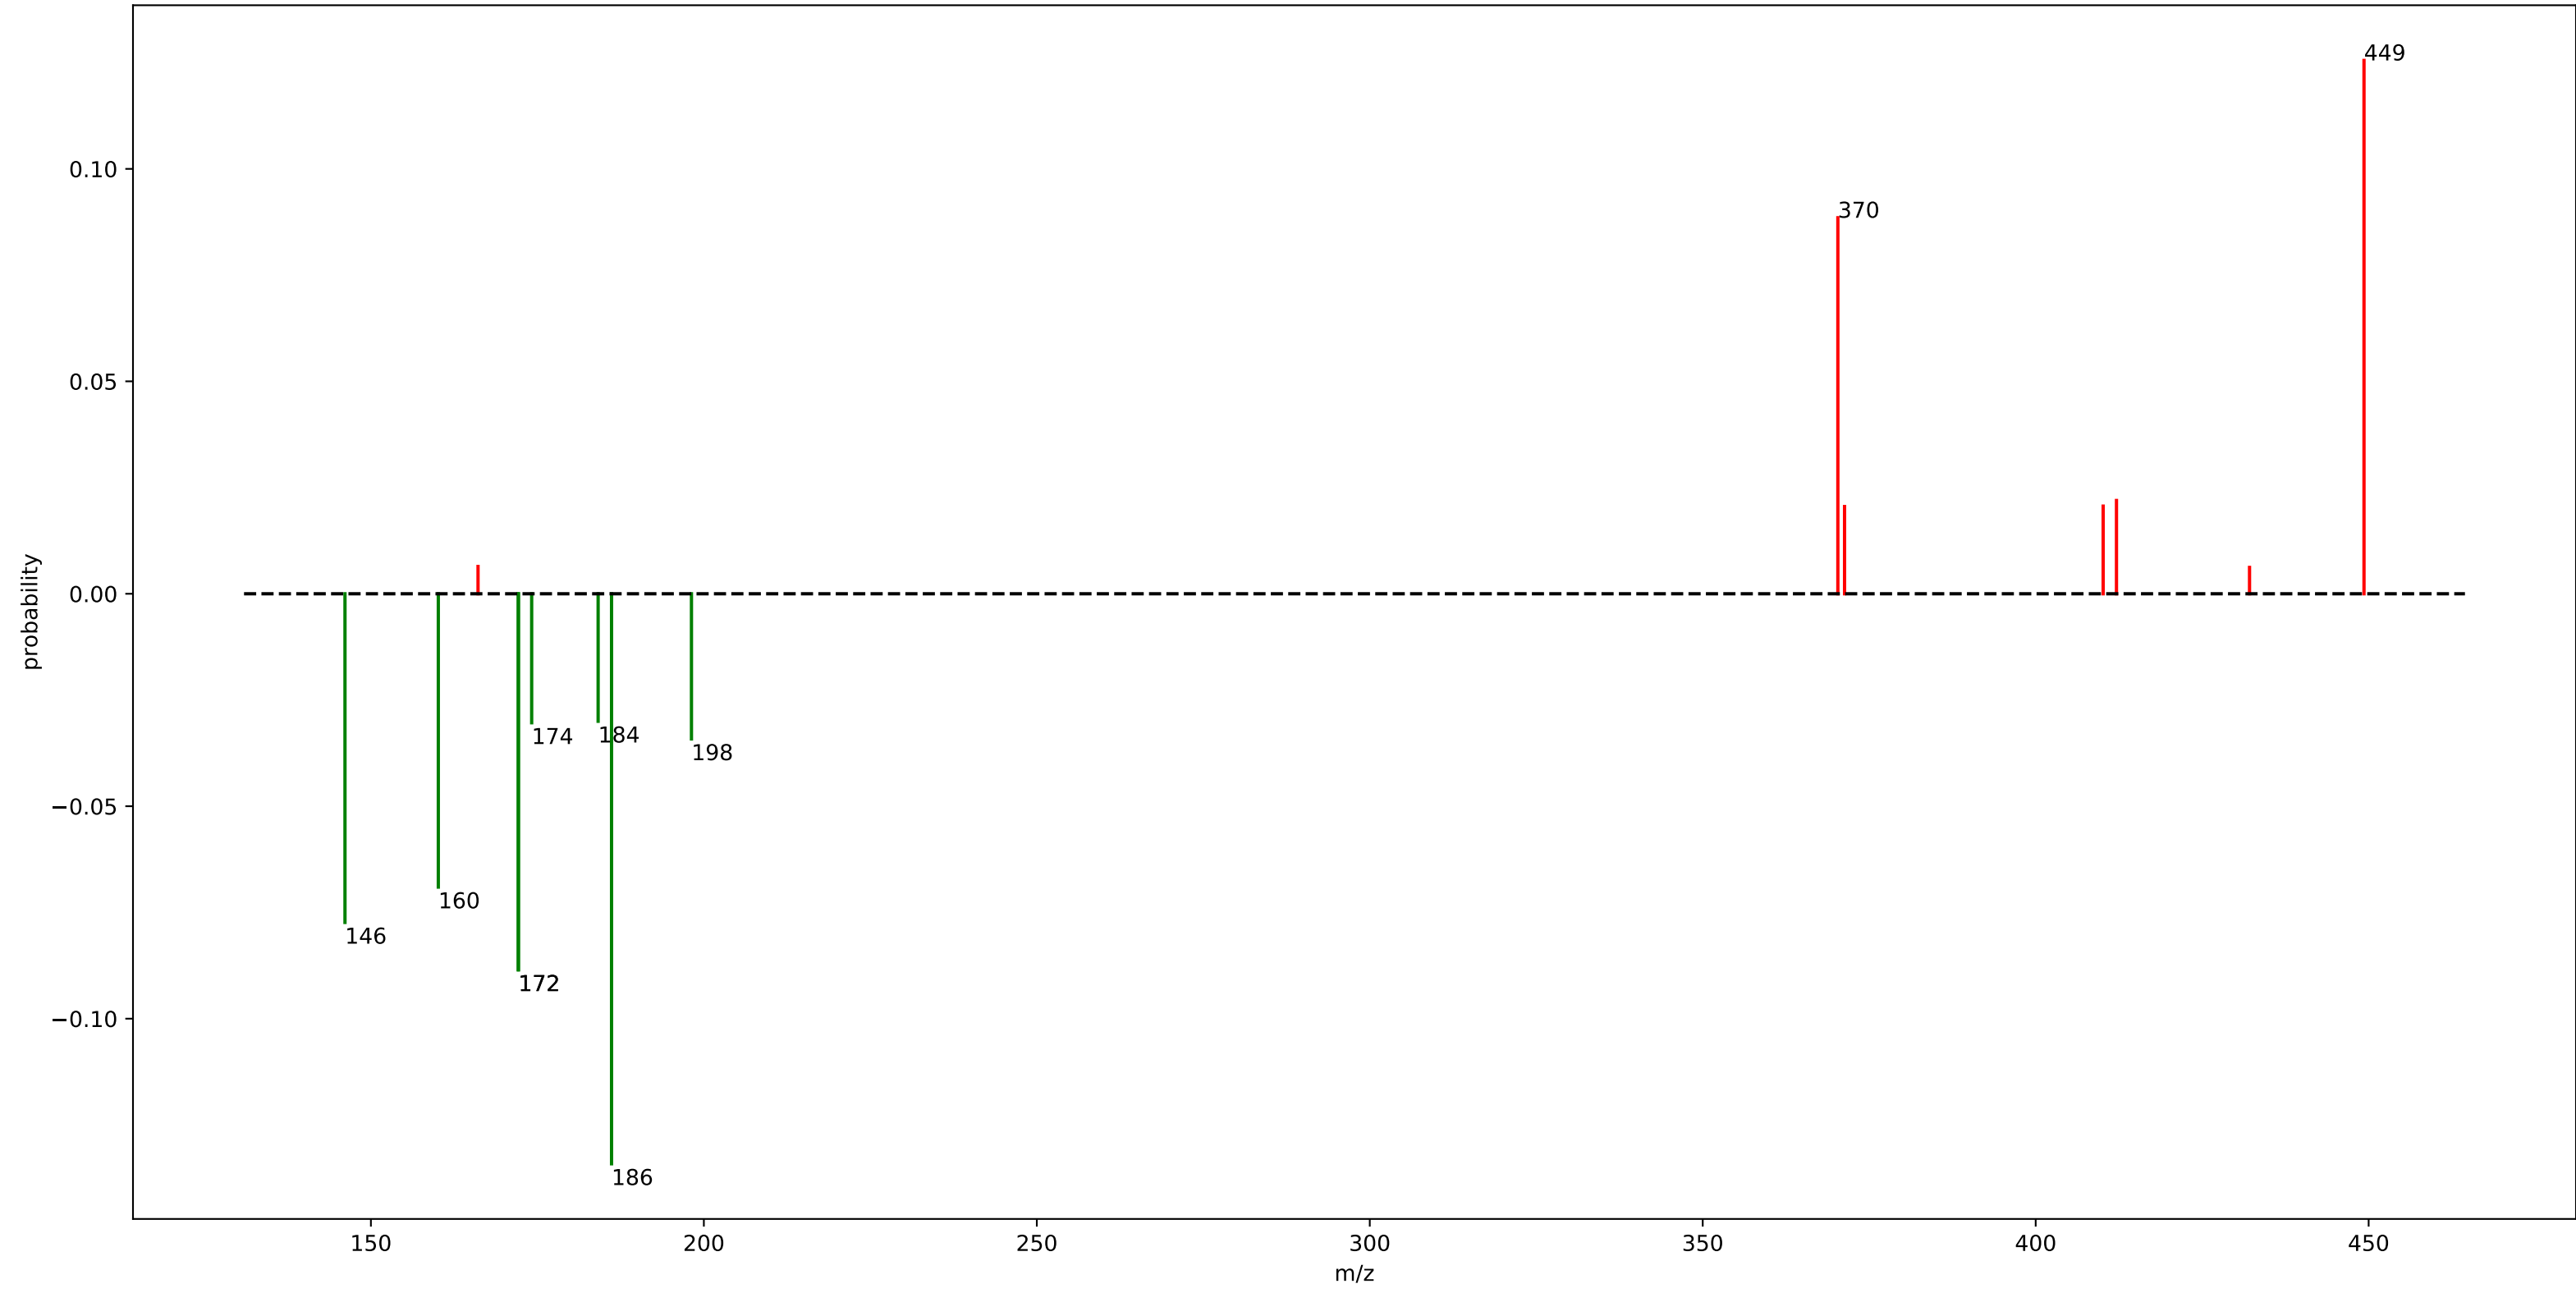

## motif\_507

|                   |        |
|-------------------|--------|
| loss_186.1375     | : 0.13 |
| fragment_449.3025 | : 0.13 |
| fragment_370.2925 | : 0.09 |
| loss_172.1625     | : 0.09 |
| loss_172.1225     | : 0.09 |
| loss_146.1075     | : 0.08 |
| loss_160.1225     | : 0.07 |
| loss_198.1375     | : 0.03 |
| loss_174.1425     | : 0.03 |
| loss_184.1225     | : 0.03 |
| fragment_412.1325 | : 0.02 |
| fragment_410.1325 | : 0.02 |
| fragment_371.2975 | : 0.02 |
| fragment_166.0875 | : 0.01 |
| fragment_432.1125 | : 0.01 |

euphorbia\_motif\_37.m2m

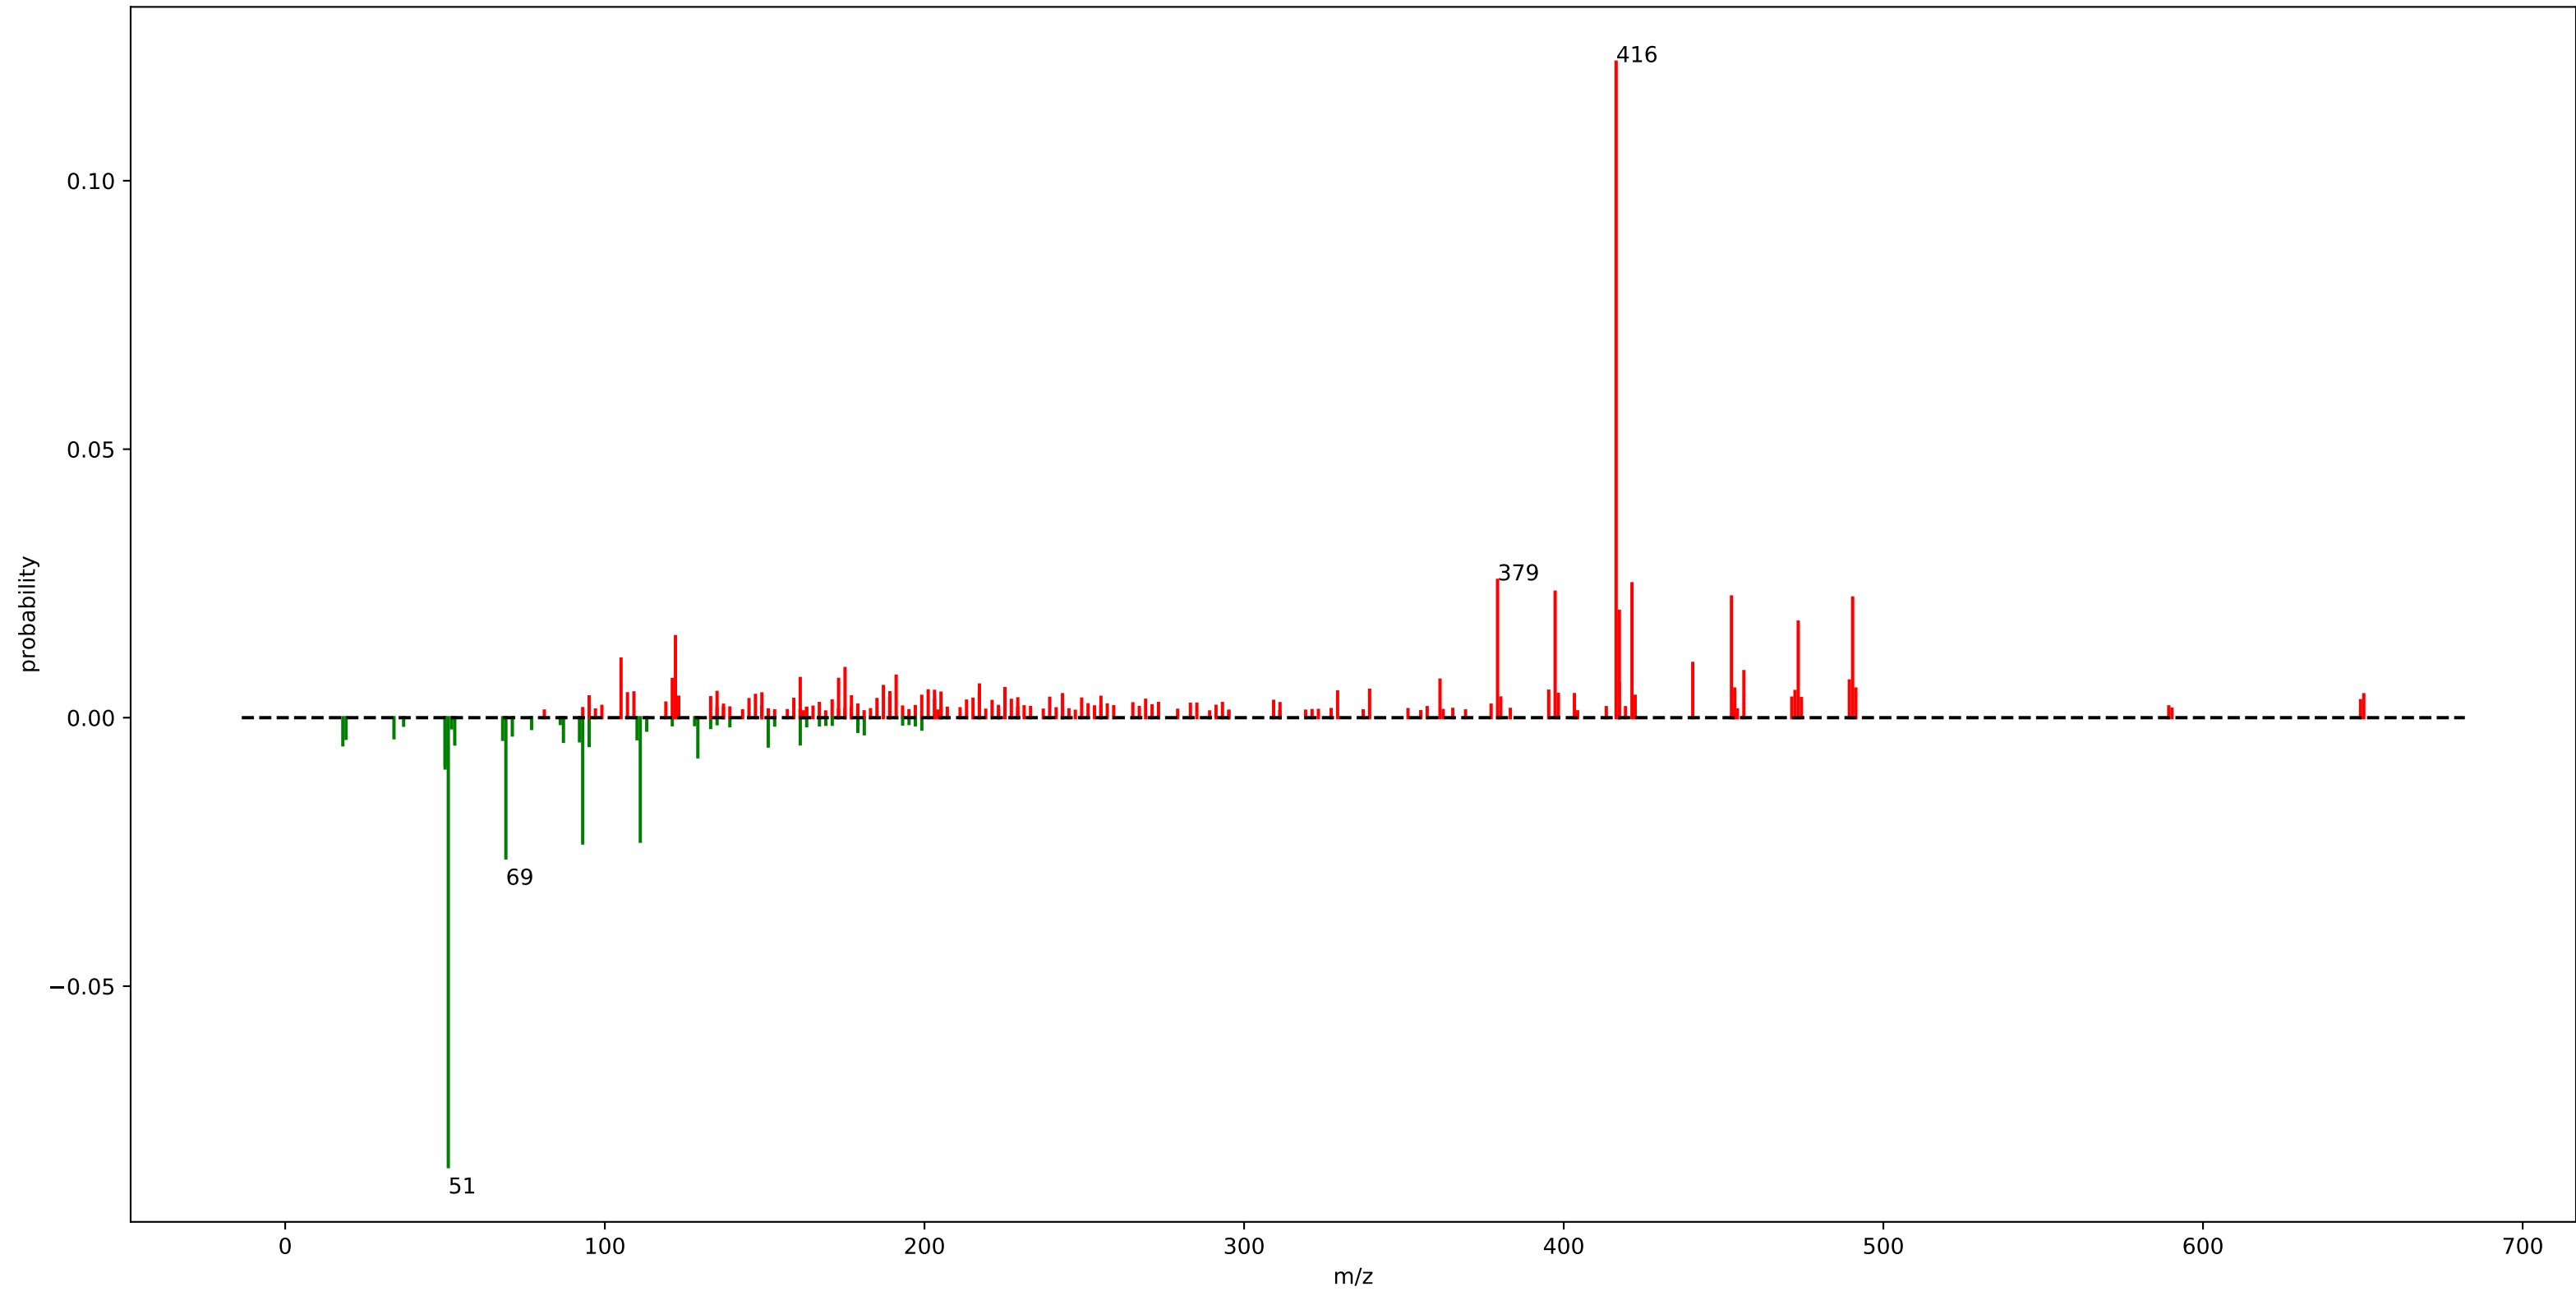

# euphorbia\_motif\_37.m2m

|                   |        |                   |        |
|-------------------|--------|-------------------|--------|
| fragment_416.3875 | : 0.12 | fragment_161.1325 | : 0.01 |
| loss_51.0275      | : 0.08 | loss_129.0975     | : 0.01 |
| loss_69.0375      | : 0.03 | fragment_173.1325 | : 0.01 |
| fragment_379.3025 | : 0.03 | fragment_121.1025 | : 0.01 |
| fragment_421.3475 | : 0.02 | fragment_361.2875 | : 0.01 |
| fragment_397.3125 | : 0.02 | fragment_489.3575 | : 0.01 |
| loss_93.0775      | : 0.02 | fragment_417.3875 | : 0.01 |
| loss_111.0875     | : 0.02 | fragment_217.1975 | : 0.01 |
| fragment_452.4775 | : 0.02 | fragment_187.1475 | : 0.01 |
| fragment_490.3875 | : 0.02 | fragment_225.1625 | : 0.01 |
| fragment_417.3925 | : 0.02 | fragment_491.3825 | : 0.01 |
| fragment_473.3625 | : 0.02 | fragment_453.4825 | : 0.01 |
| fragment_122.0975 | : 0.02 | loss_151.1175     | : 0.01 |
| fragment_105.0675 | : 0.01 | loss_95.0925      | : 0.01 |
| fragment_440.3625 | : 0.01 | fragment_339.2675 | : 0.01 |
| loss_50.0275      | : 0.01 | loss_18.0325      | : 0.01 |
| fragment_175.1475 | : 0.01 |                   |        |
| loss_50.0225      | : 0.01 |                   |        |
| fragment_456.3575 | : 0.01 |                   |        |
| fragment_191.1425 | : 0.01 |                   |        |

motif\_661

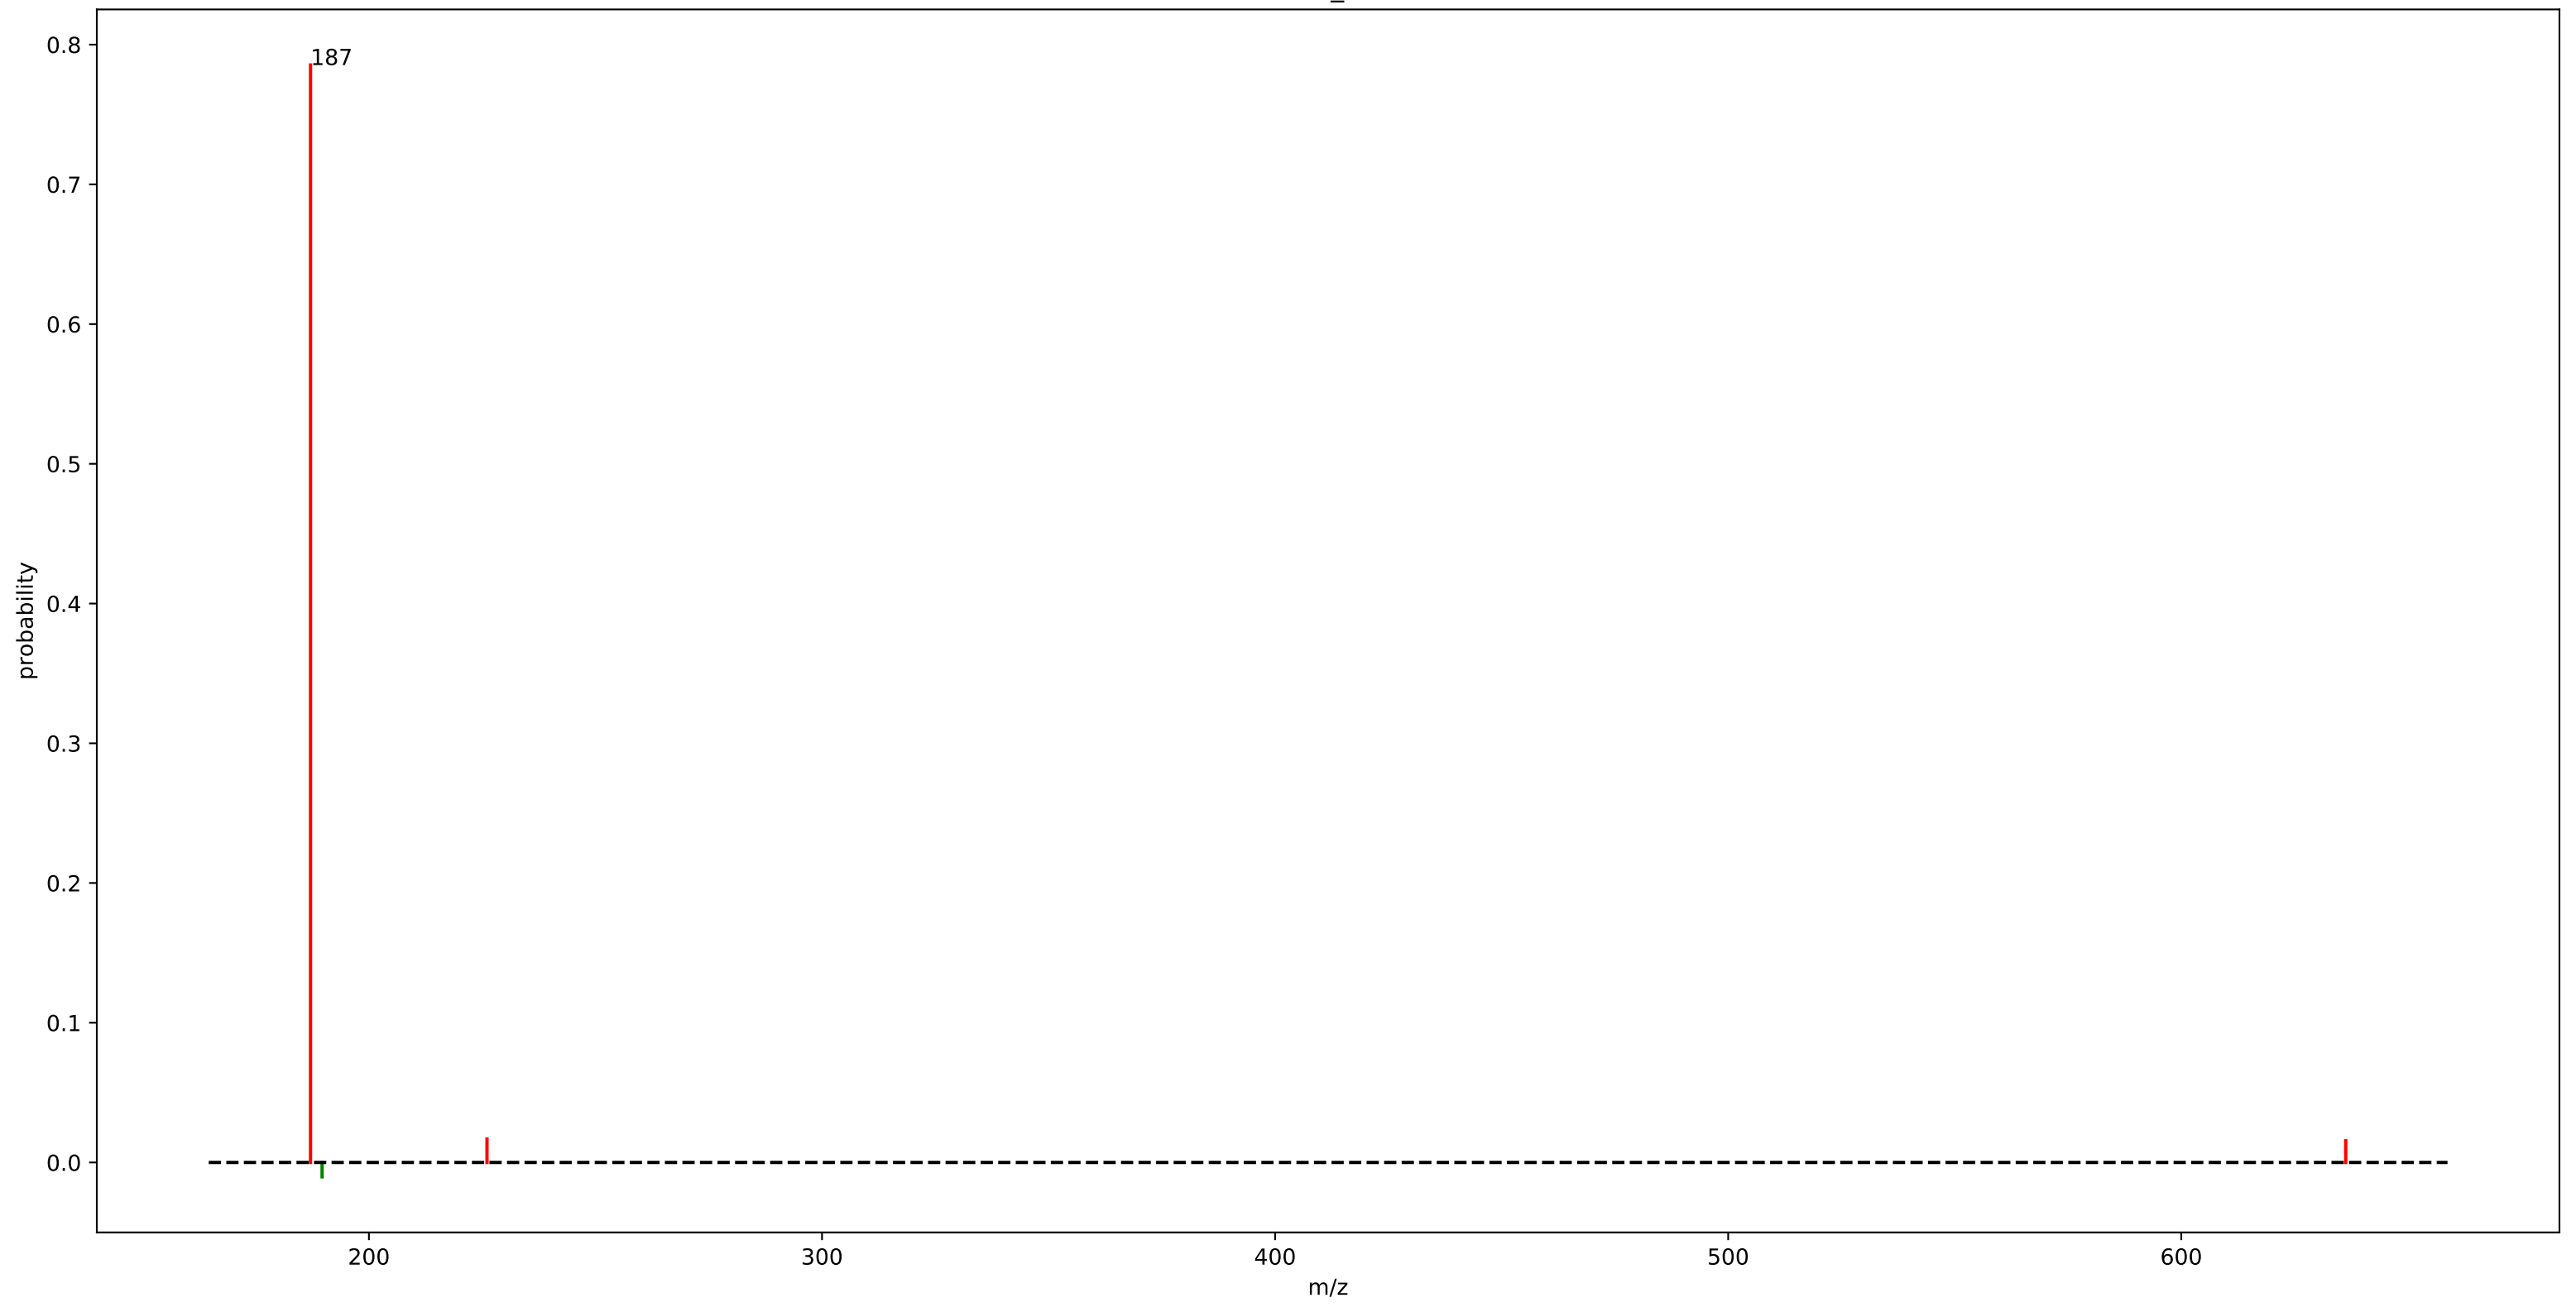

## motif\_661

|                   |        |
|-------------------|--------|
| fragment_187.1075 | : 0.79 |
| fragment_226.0575 | : 0.02 |
| fragment_636.3025 | : 0.02 |
| loss_189.6625     | : 0.01 |



motif\_660

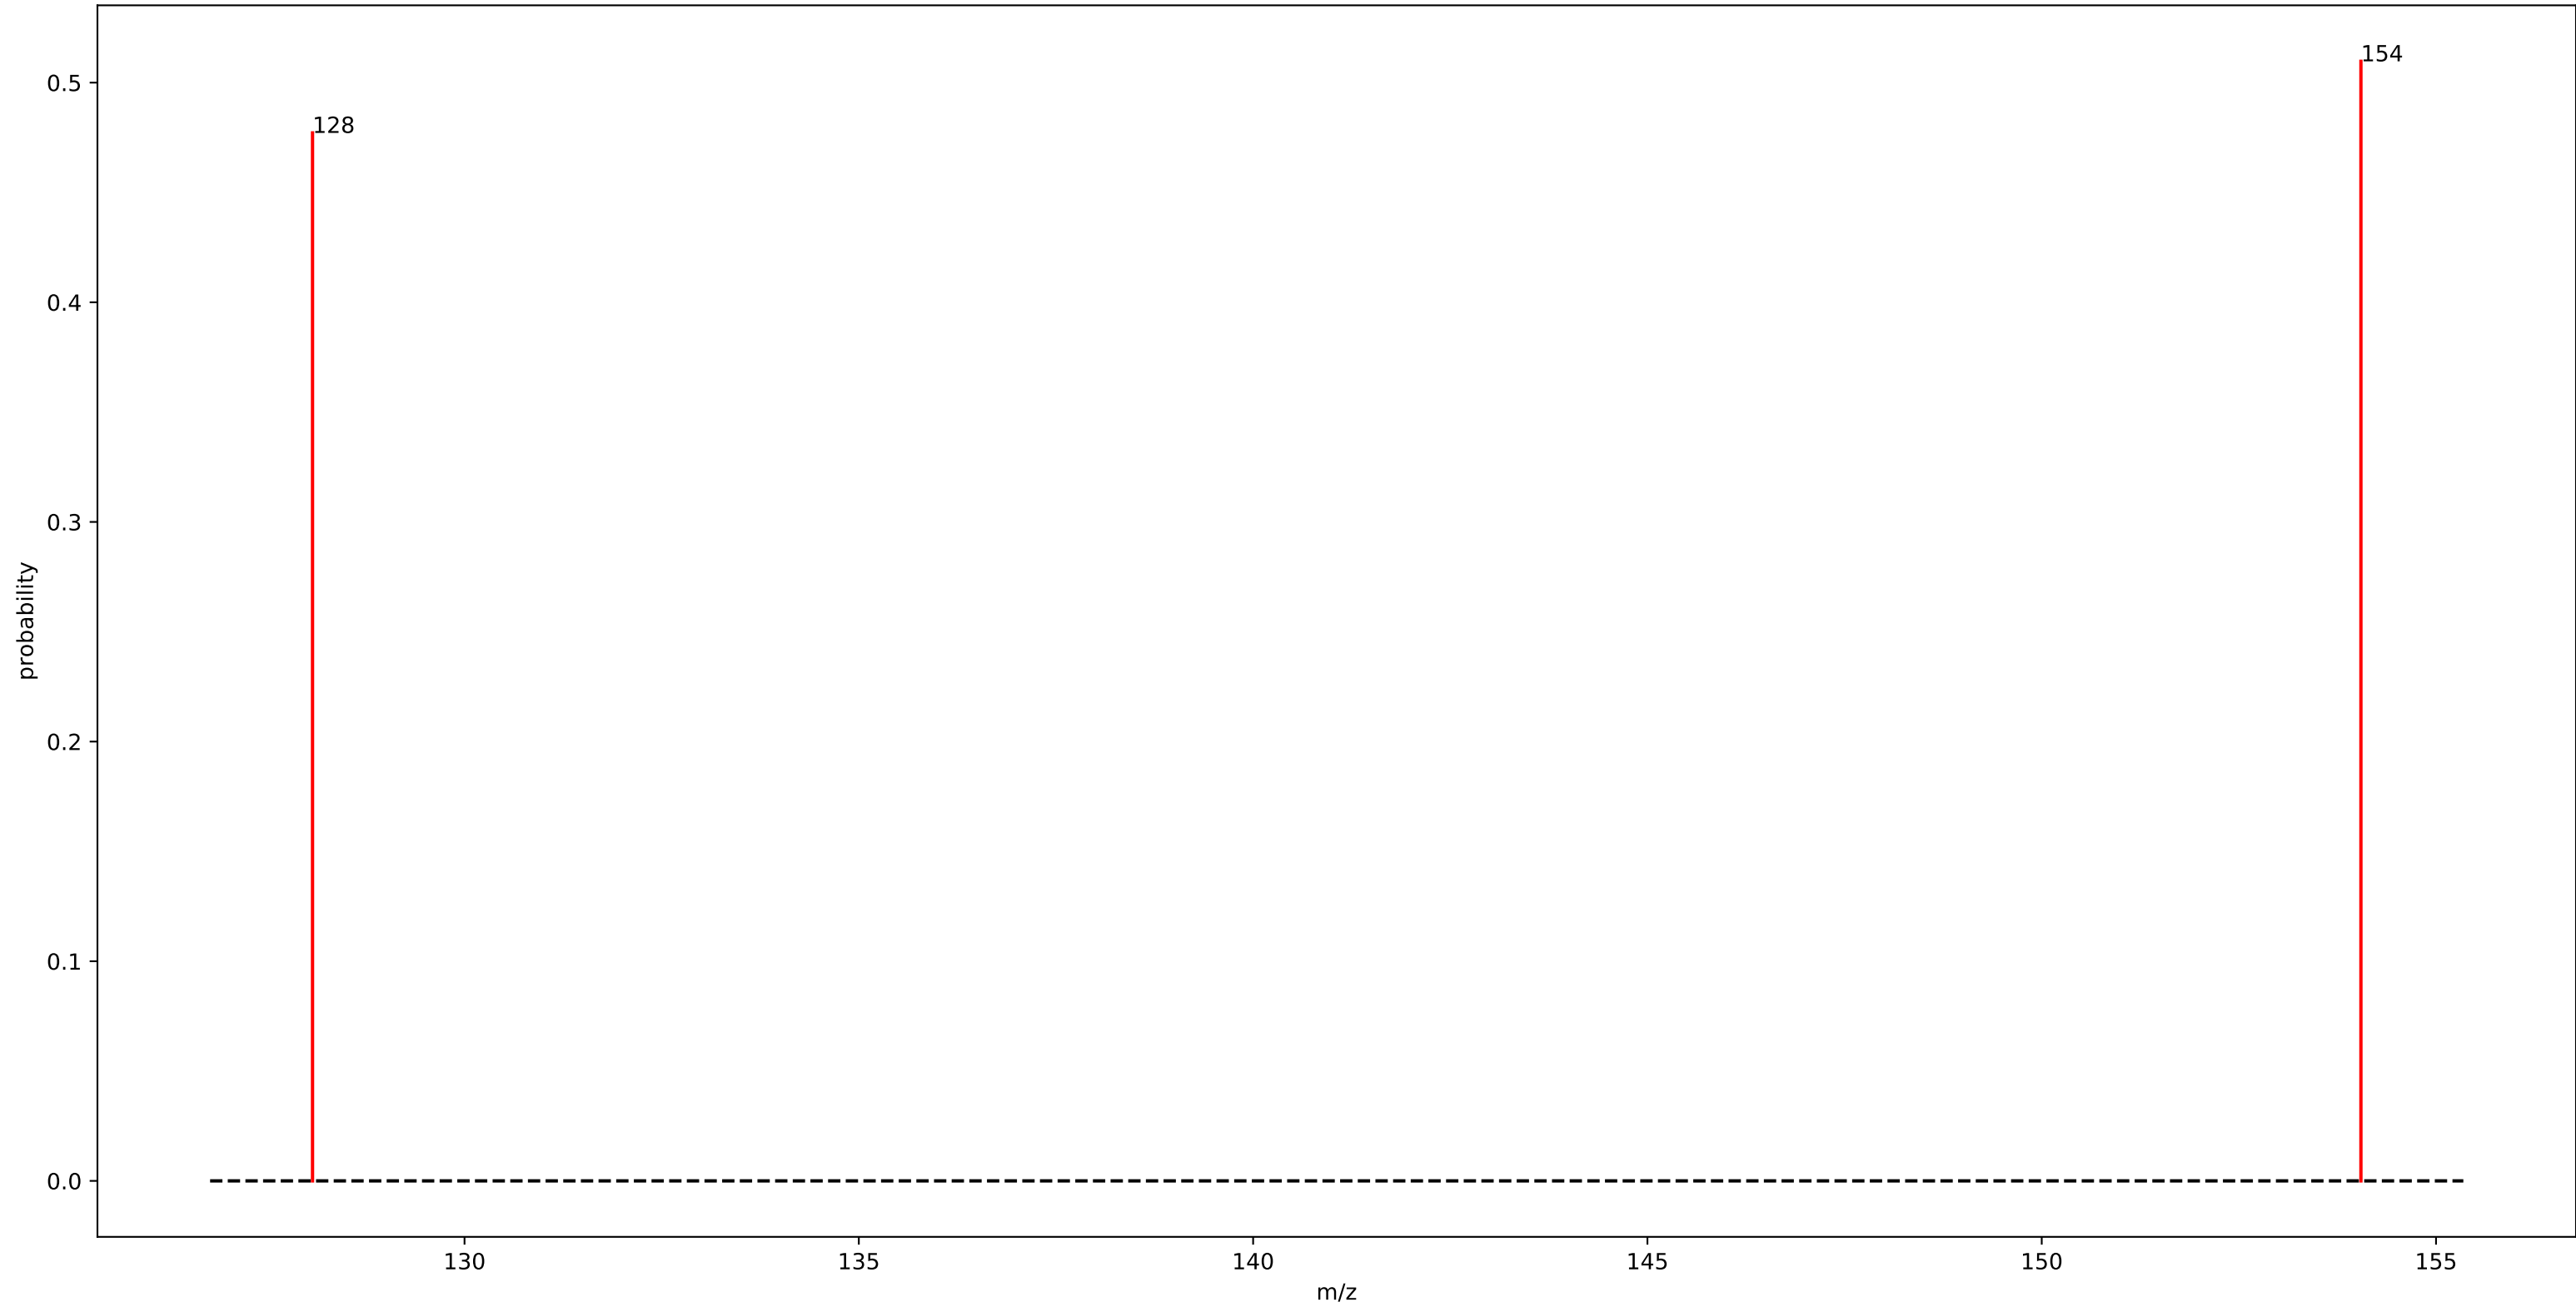

## motif\_660

fragment\_154.0475 : 0.51  
fragment\_128.0725 : 0.48

motif\_478

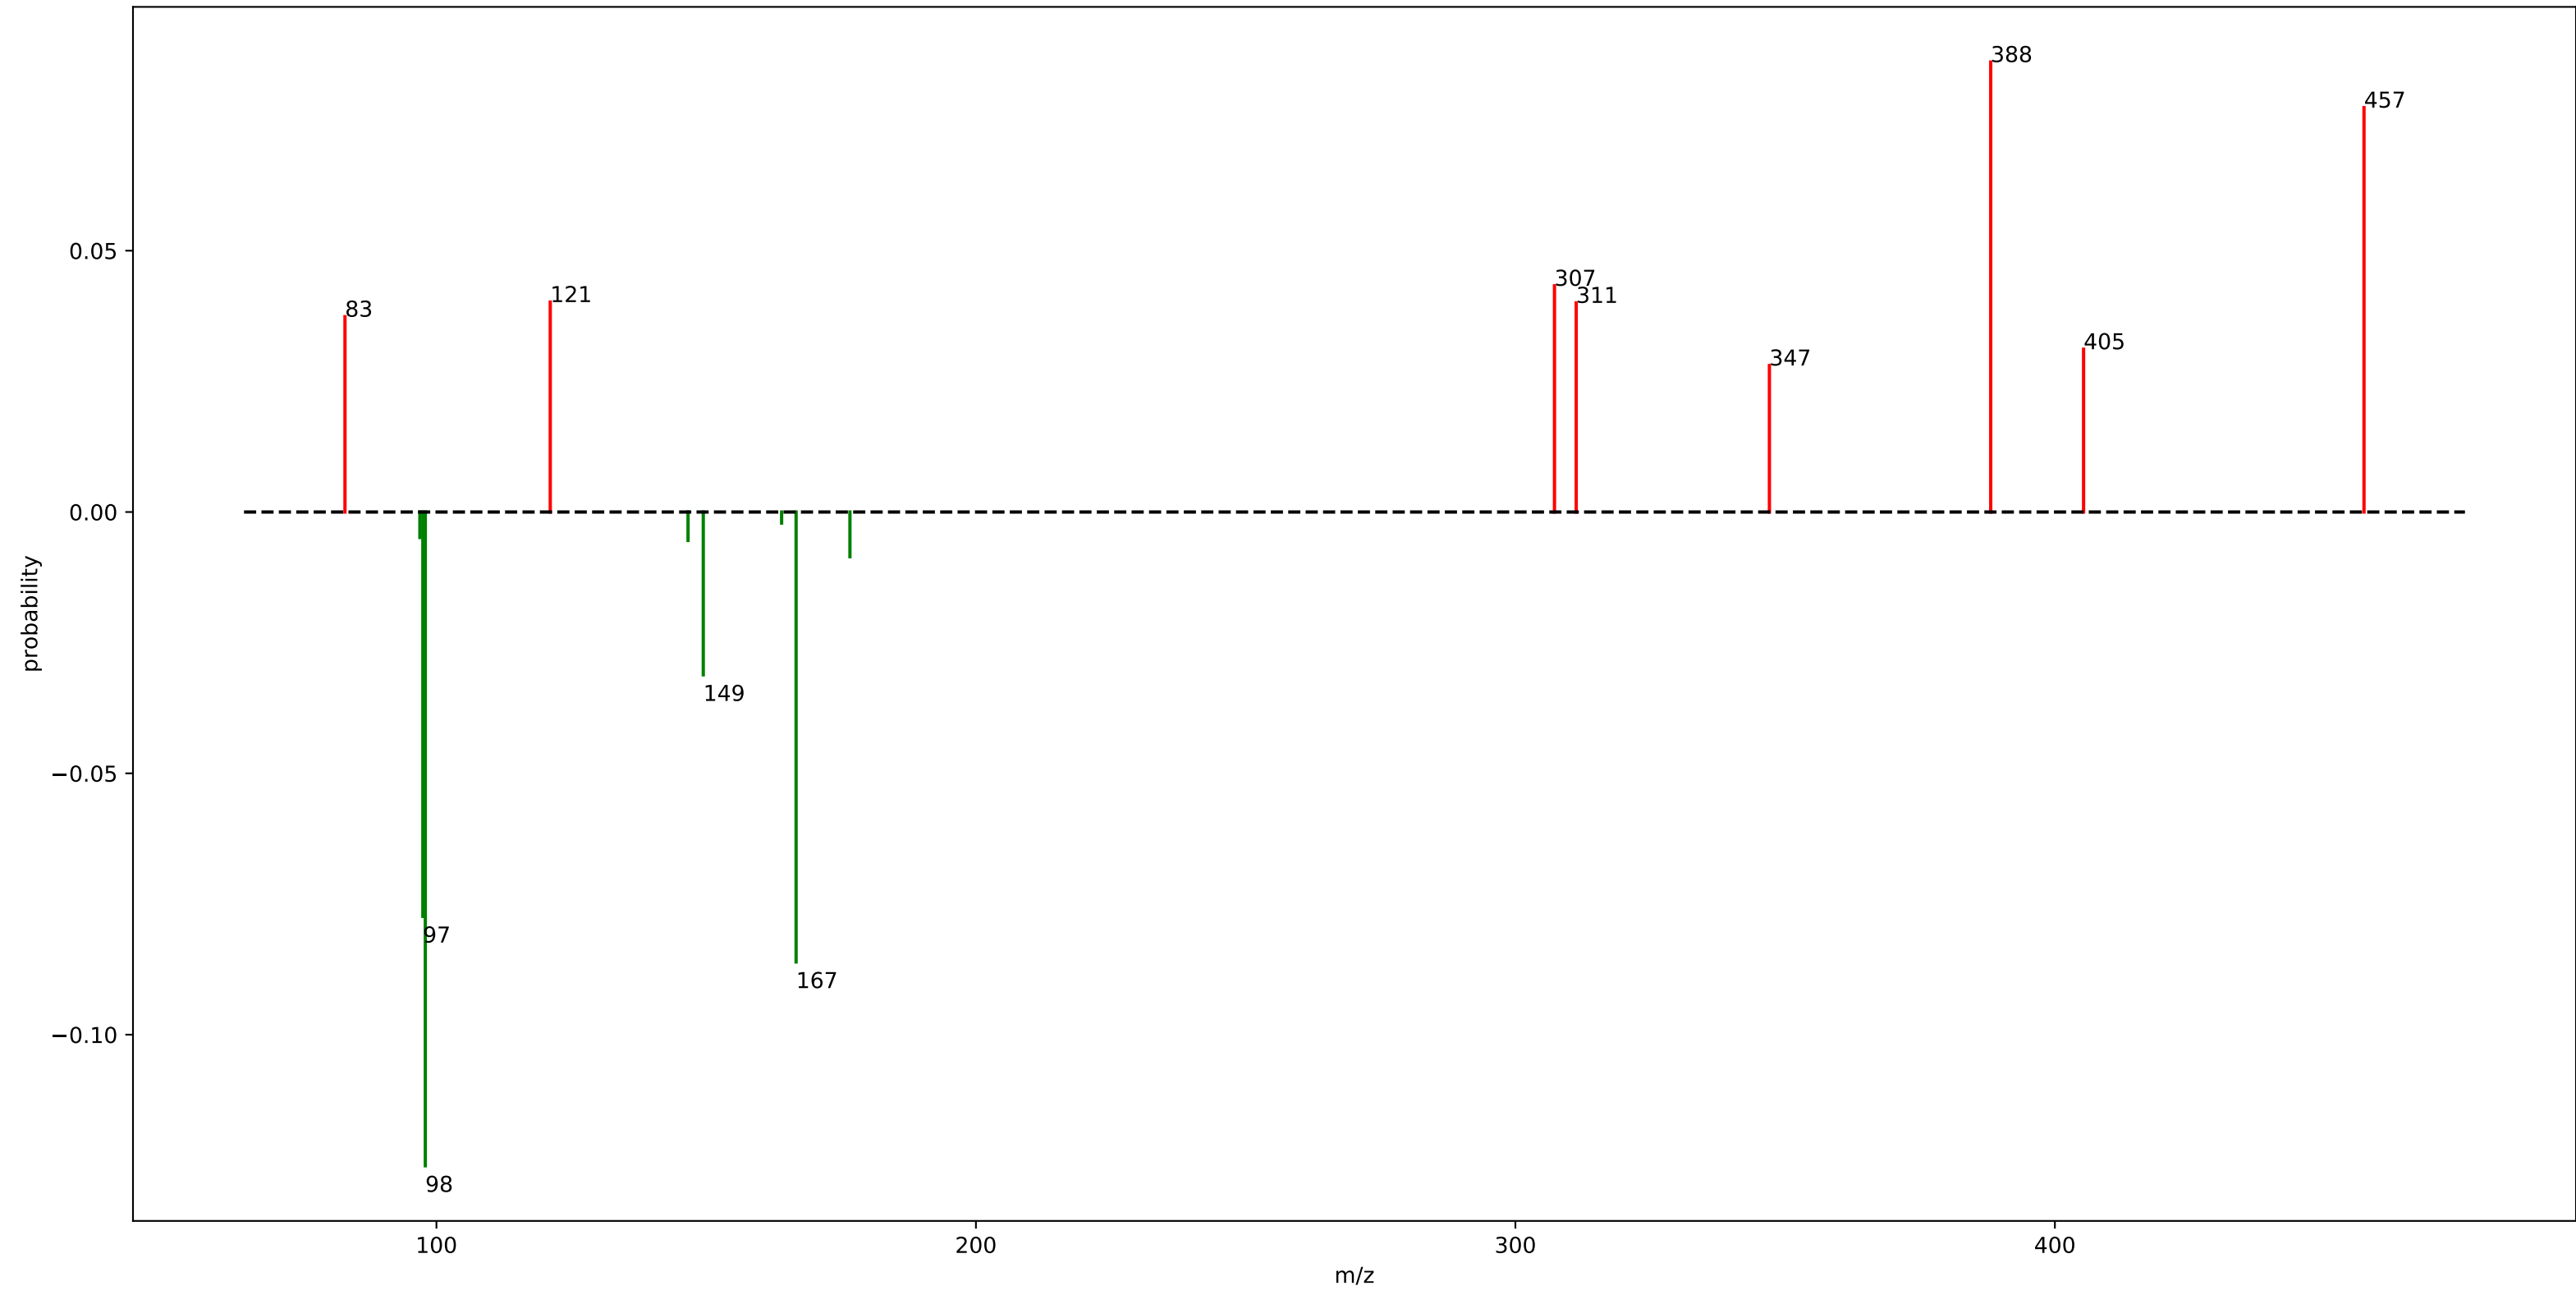

## motif\_478

|                   |        |
|-------------------|--------|
| loss_97.9375      | : 0.13 |
| loss_166.6675     | : 0.09 |
| fragment_388.1075 | : 0.09 |
| loss_97.4825      | : 0.08 |
| fragment_457.2975 | : 0.08 |
| fragment_307.2425 | : 0.04 |
| fragment_121.0975 | : 0.04 |
| fragment_311.2725 | : 0.04 |
| fragment_83.0475  | : 0.04 |
| loss_149.4625     | : 0.03 |
| fragment_405.3175 | : 0.03 |
| fragment_347.0825 | : 0.03 |
| loss_176.6475     | : 0.01 |
| loss_146.6375     | : 0.01 |

StrepSalini\_motif\_208.m2m

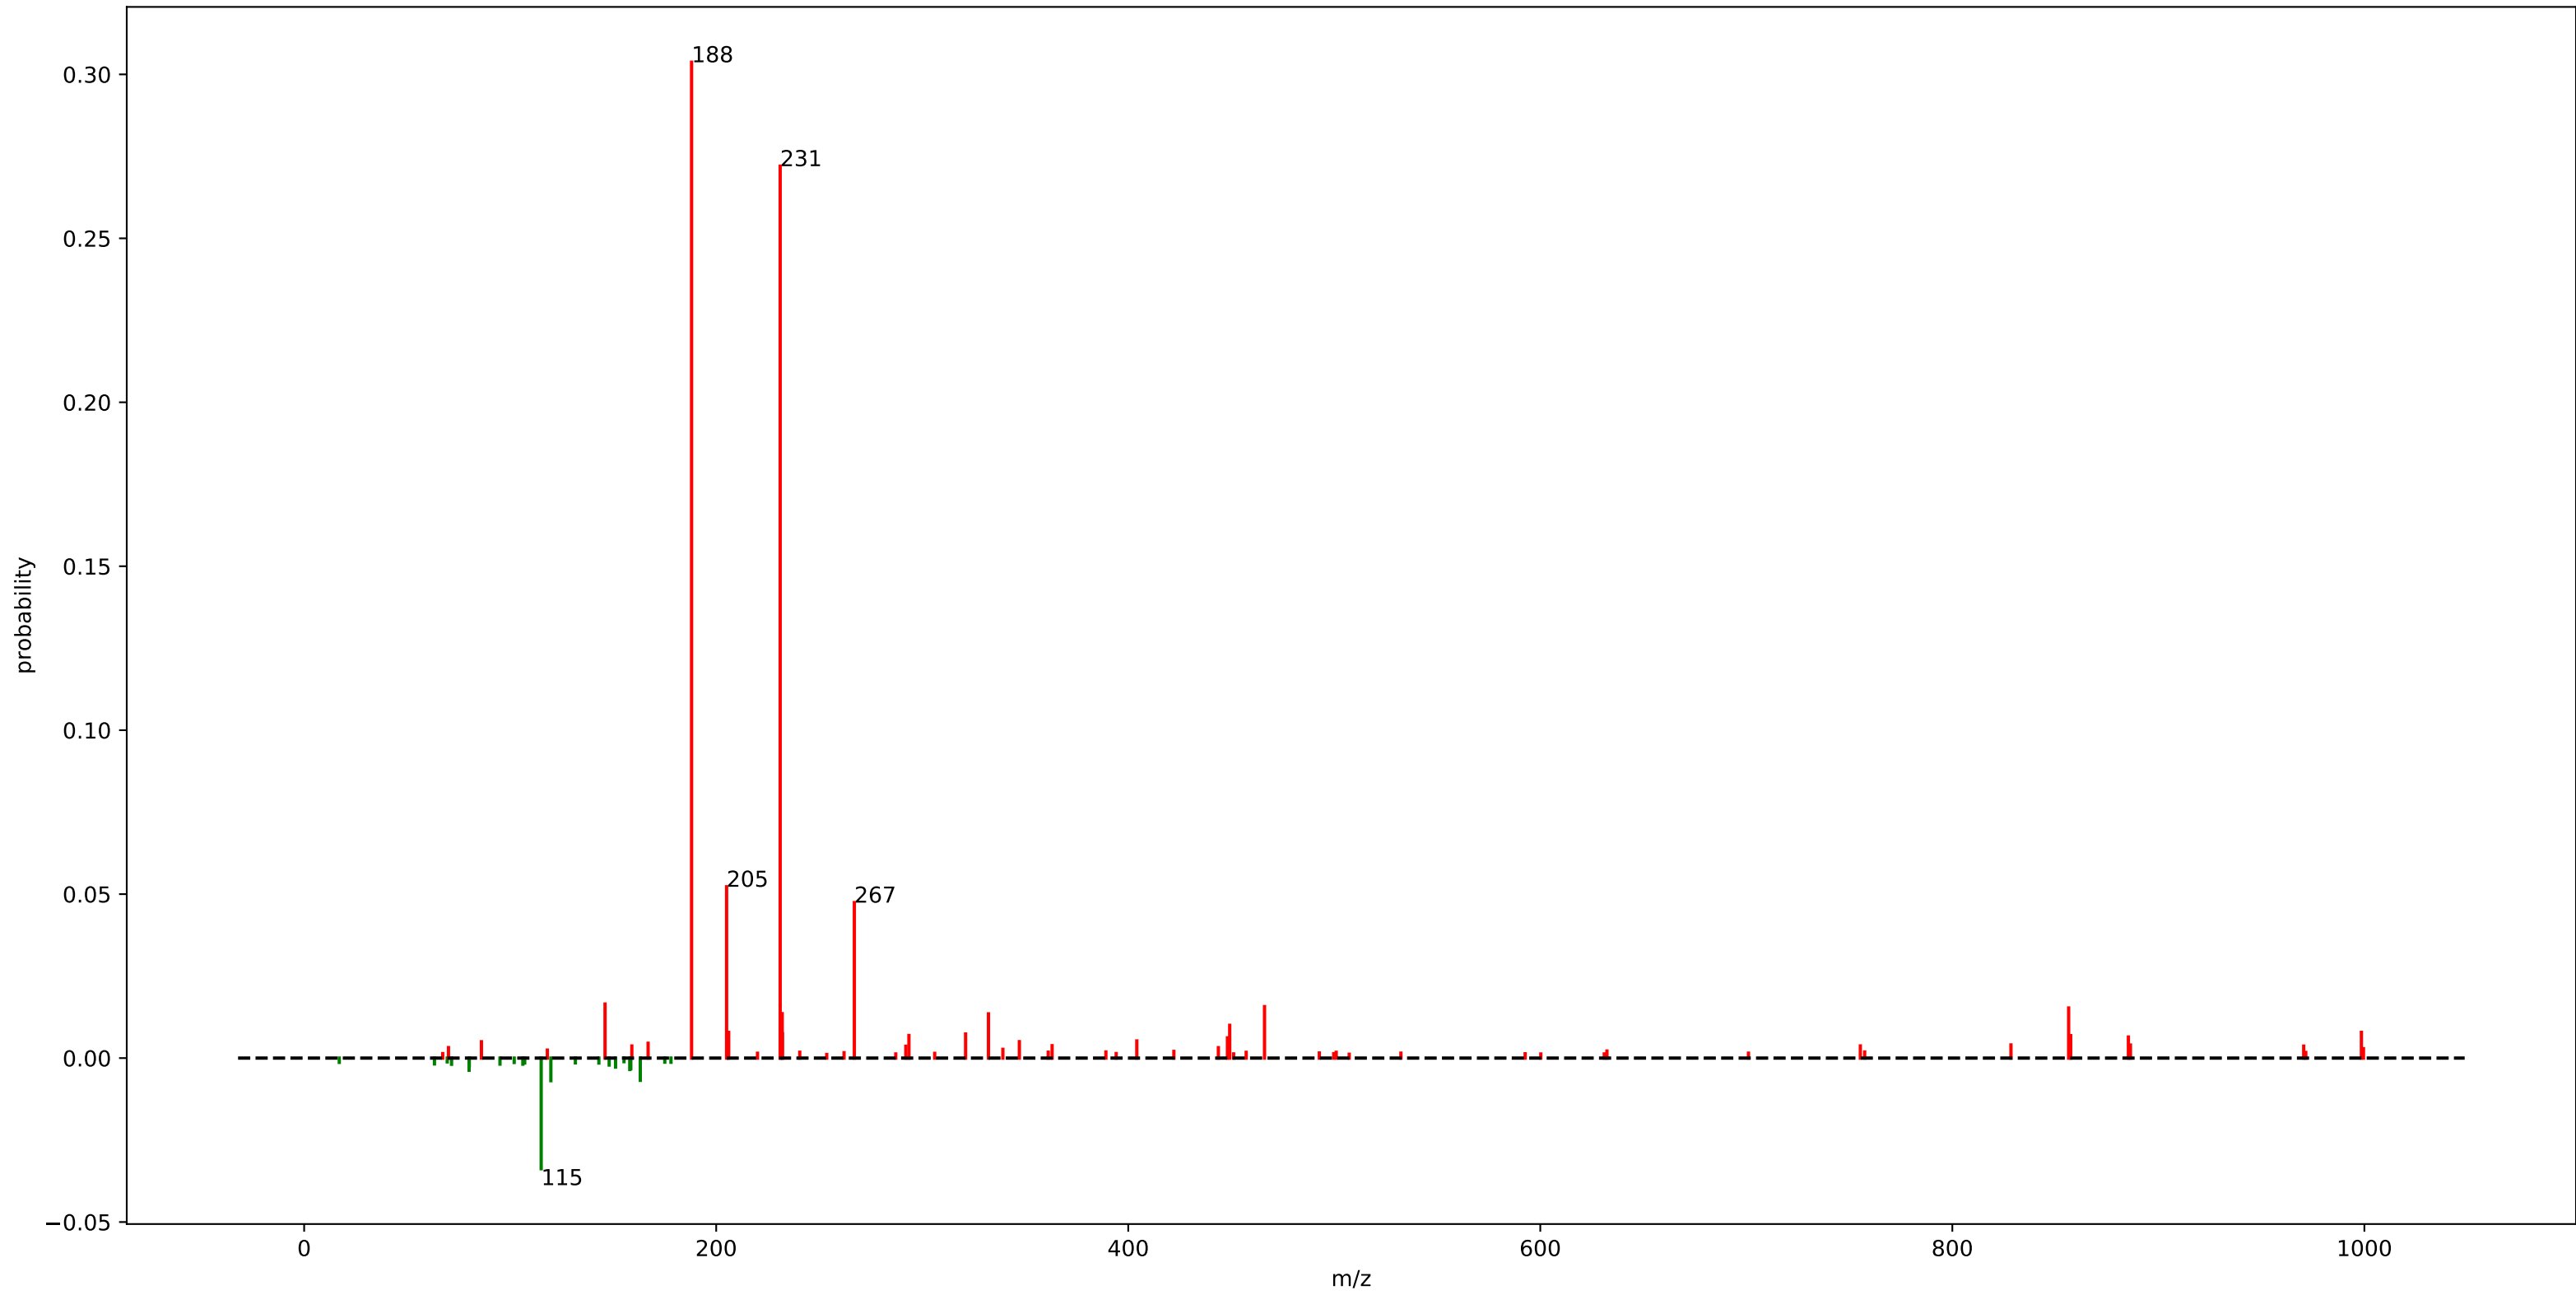

## StrepSalini\_motif\_208.m2m

|                   |        |                   |        |
|-------------------|--------|-------------------|--------|
| fragment_188.0500 | : 0.30 | fragment_448.1500 | : 0.01 |
| fragment_231.0500 | : 0.27 | fragment_404.1500 | : 0.01 |
| fragment_205.0500 | : 0.05 | fragment_347.1500 | : 0.01 |
| fragment_267.0500 | : 0.05 |                   |        |
| loss_115.0500     | : 0.03 |                   |        |
| fragment_146.0500 | : 0.02 |                   |        |
| fragment_466.1500 | : 0.02 |                   |        |
| fragment_856.4500 | : 0.02 |                   |        |
| fragment_232.0500 | : 0.01 |                   |        |
| fragment_332.1500 | : 0.01 |                   |        |
| fragment_449.2500 | : 0.01 |                   |        |
| fragment_998.5500 | : 0.01 |                   |        |
| fragment_206.0500 | : 0.01 |                   |        |
| fragment_232.1500 | : 0.01 |                   |        |
| fragment_321.0500 | : 0.01 |                   |        |
| fragment_293.5500 | : 0.01 |                   |        |
| loss_119.7500     | : 0.01 |                   |        |
| fragment_857.4500 | : 0.01 |                   |        |
| loss_163.1500     | : 0.01 |                   |        |
| fragment_885.4525 | : 0.01 |                   |        |

motif\_479

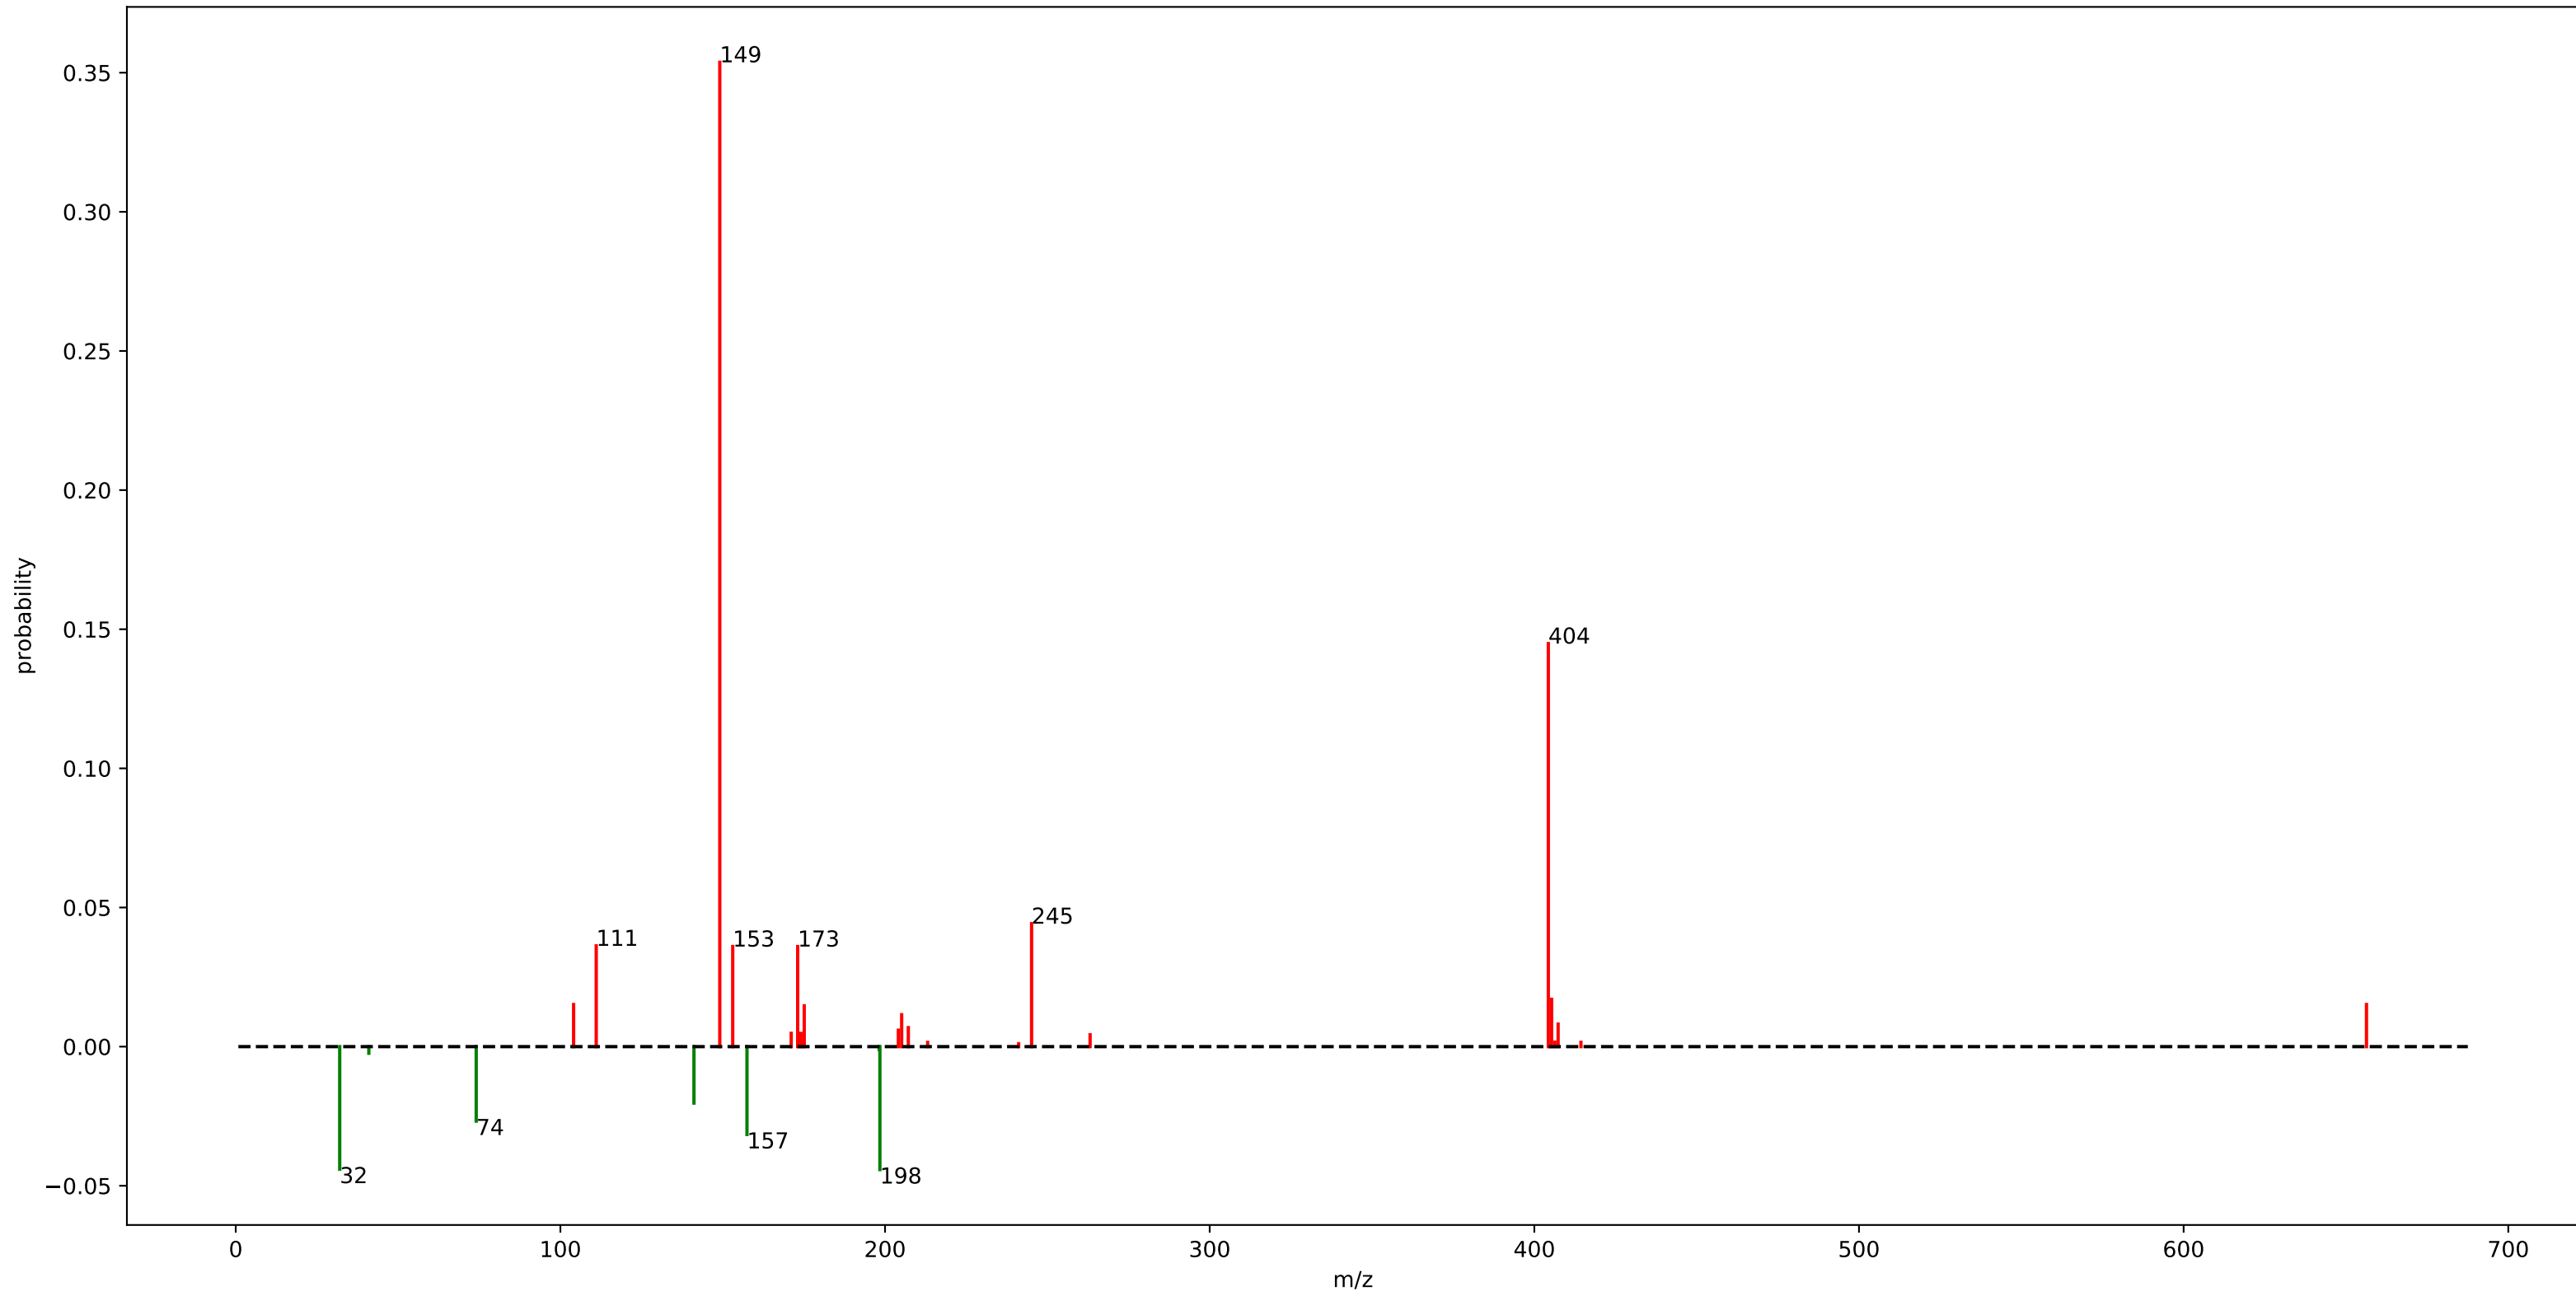

## motif\_479

|                   |        |
|-------------------|--------|
| fragment_149.0975 | : 0.35 |
| fragment_404.3125 | : 0.14 |
| loss_198.4175     | : 0.04 |
| fragment_245.1375 | : 0.04 |
| loss_32.0275      | : 0.04 |
| fragment_111.0425 | : 0.04 |
| fragment_153.0875 | : 0.04 |
| fragment_173.0975 | : 0.04 |
| loss_157.4775     | : 0.03 |
| loss_74.0725      | : 0.03 |
| loss_141.1425     | : 0.02 |
| fragment_405.3175 | : 0.02 |
| fragment_656.3225 | : 0.02 |
| fragment_104.0725 | : 0.02 |
| fragment_175.1125 | : 0.01 |
| fragment_205.1225 | : 0.01 |
| fragment_407.3275 | : 0.01 |
| fragment_207.1725 | : 0.01 |
| fragment_204.1075 | : 0.01 |



motif\_636

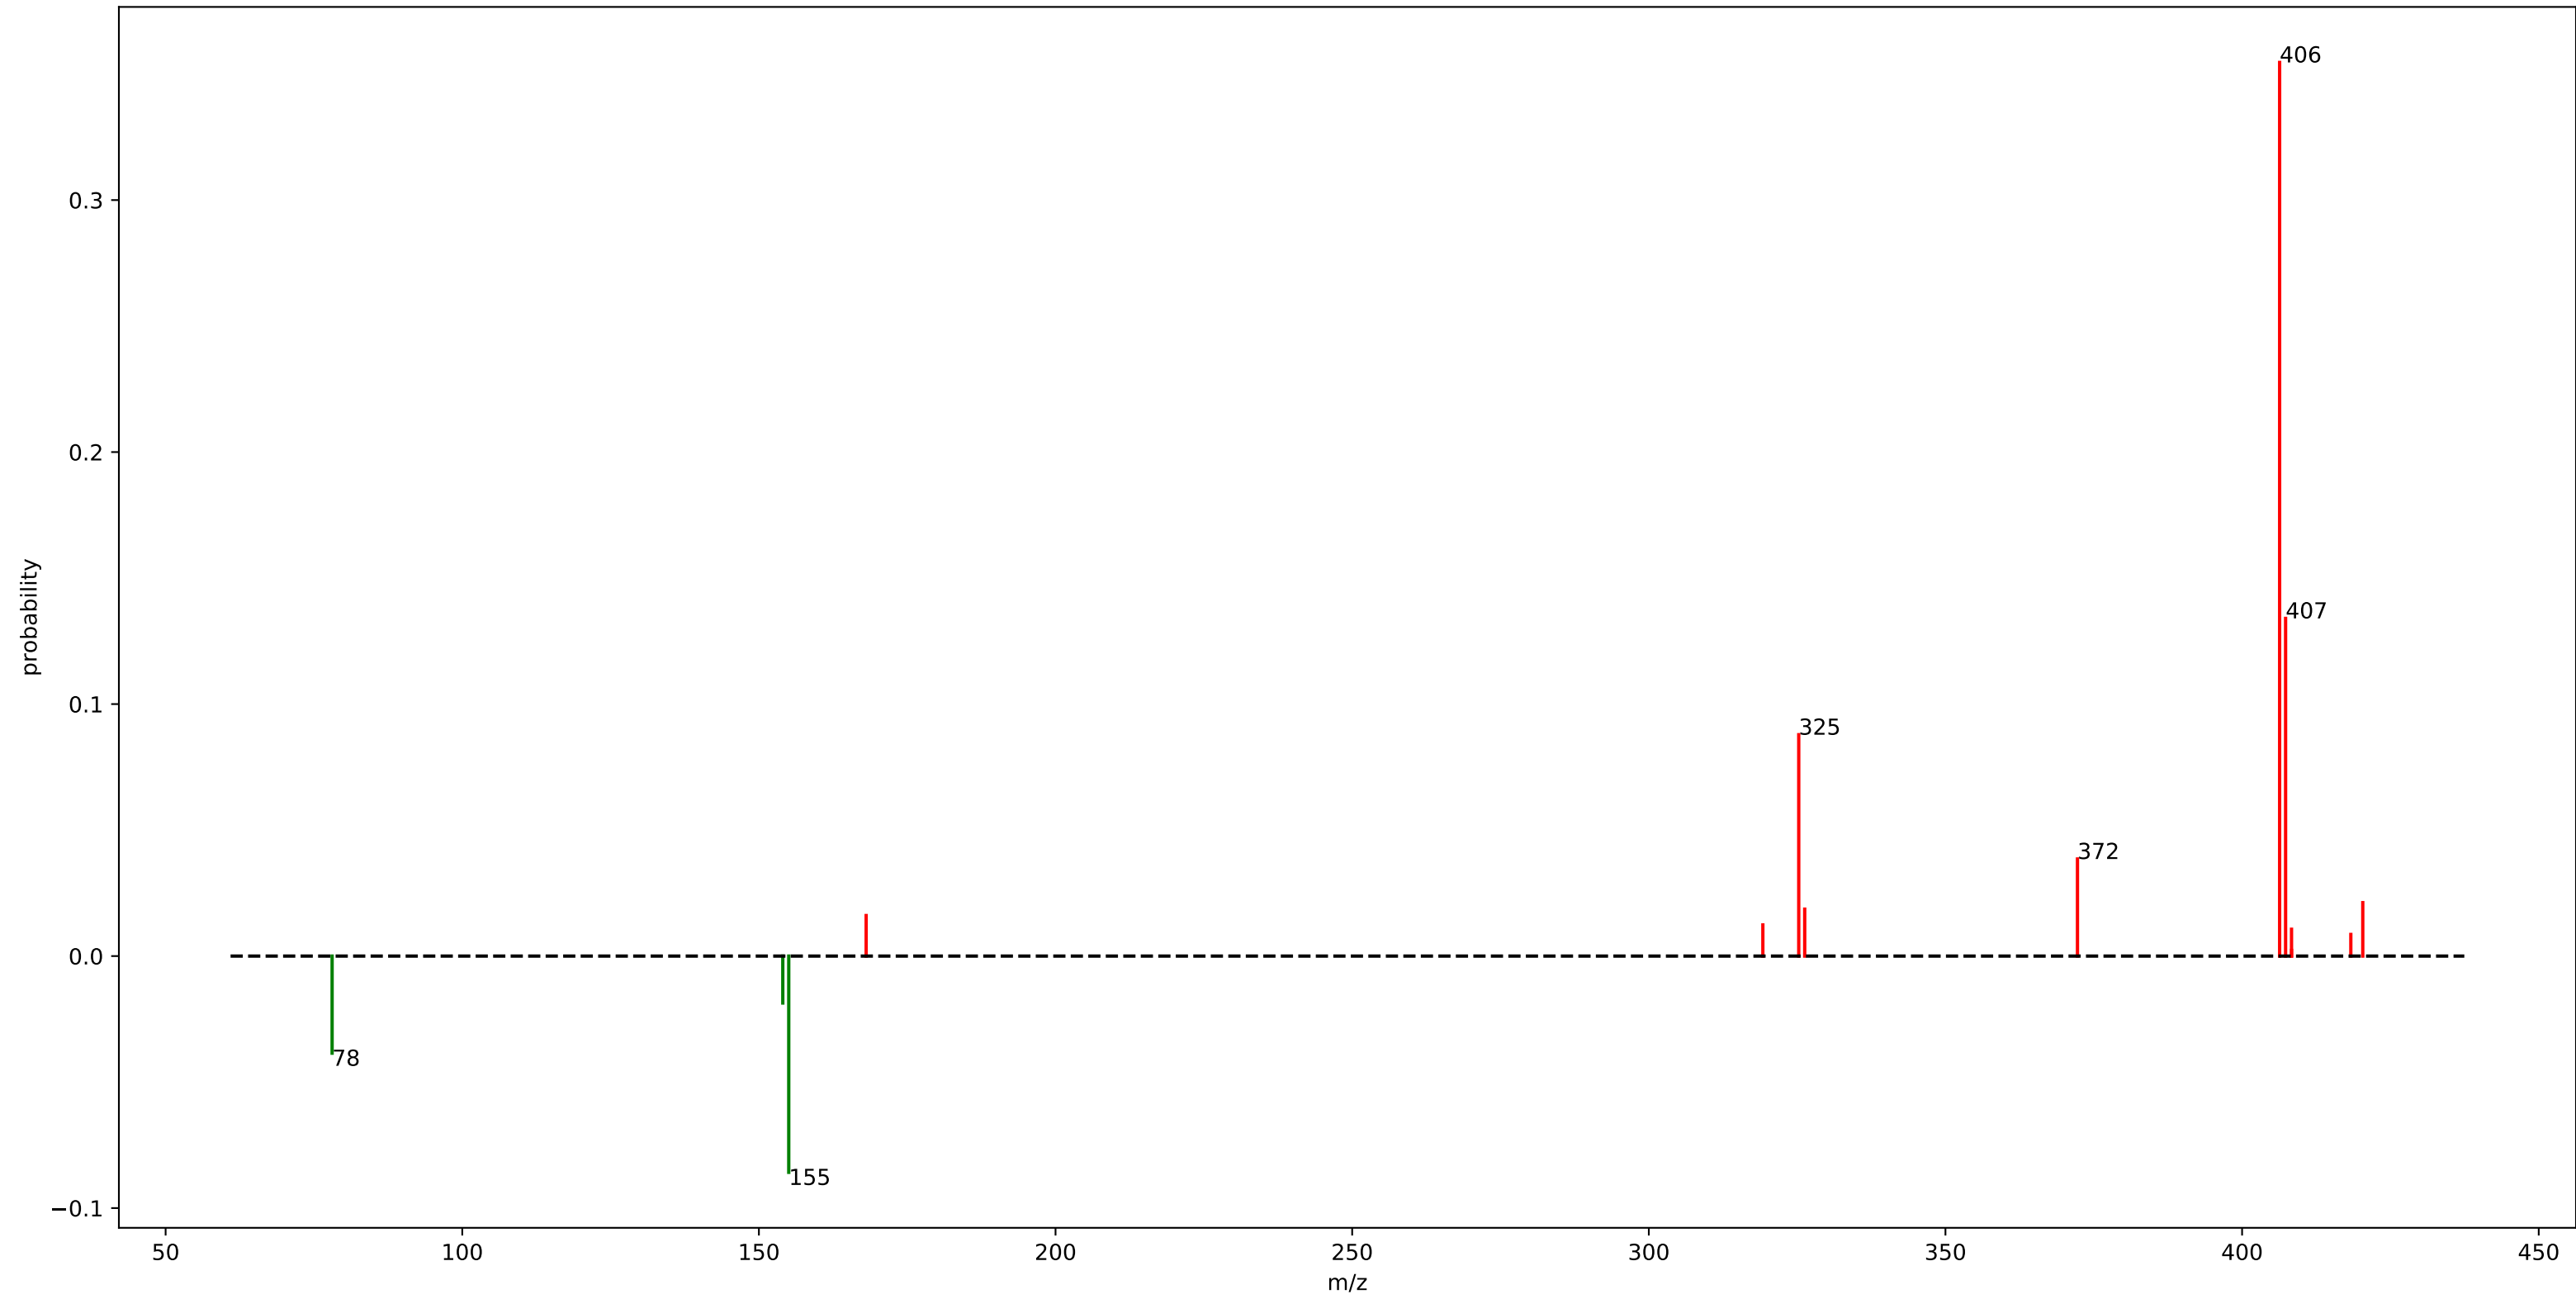

## motif\_636

|                   |        |
|-------------------|--------|
| fragment_406.3275 | : 0.35 |
| fragment_407.3325 | : 0.13 |
| fragment_325.2725 | : 0.09 |
| loss_155.0325     | : 0.09 |
| fragment_372.2525 | : 0.04 |
| loss_78.0625      | : 0.04 |
| fragment_420.3425 | : 0.02 |
| fragment_326.2775 | : 0.02 |
| loss_154.0275     | : 0.02 |
| fragment_168.0775 | : 0.02 |
| fragment_319.2225 | : 0.01 |
| fragment_408.3325 | : 0.01 |
| fragment_418.3275 | : 0.01 |

motif\_580

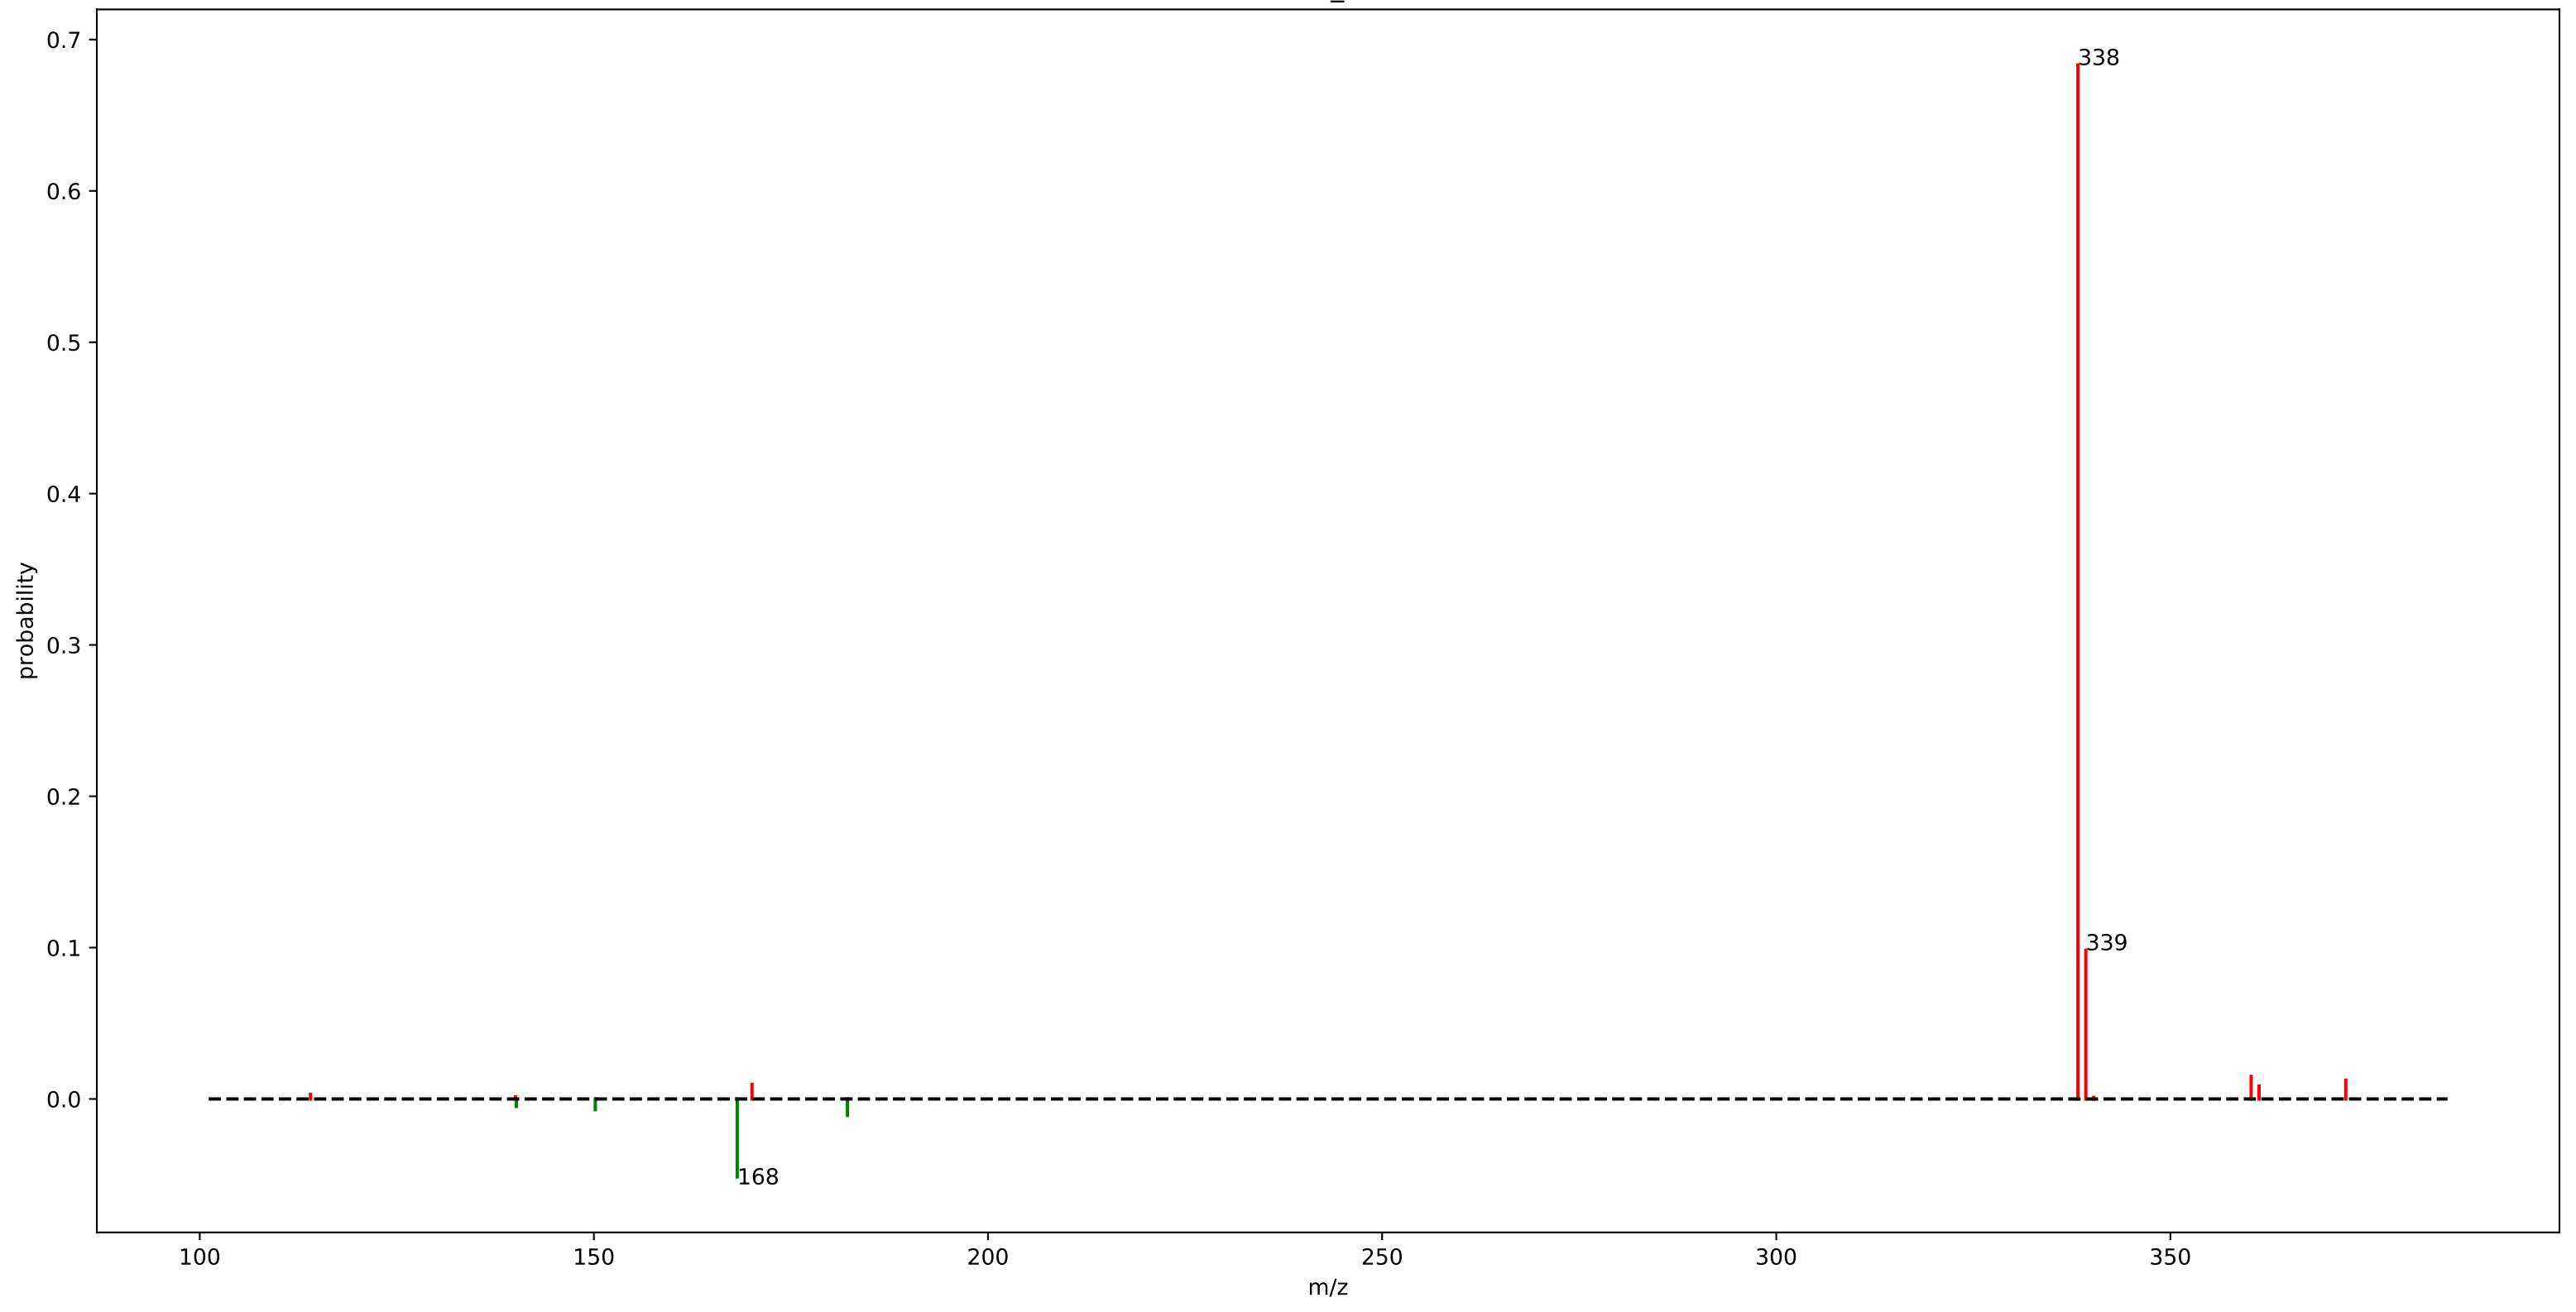

## motif\_580

|                   |        |
|-------------------|--------|
| fragment_338.2675 | : 0.68 |
| fragment_339.2725 | : 0.10 |
| loss_168.1875     | : 0.05 |
| fragment_360.2475 | : 0.01 |
| fragment_372.2475 | : 0.01 |
| loss_182.1725     | : 0.01 |
| fragment_170.0575 | : 0.01 |
| fragment_361.2525 | : 0.01 |
| loss_150.1775     | : 0.01 |

motif\_634

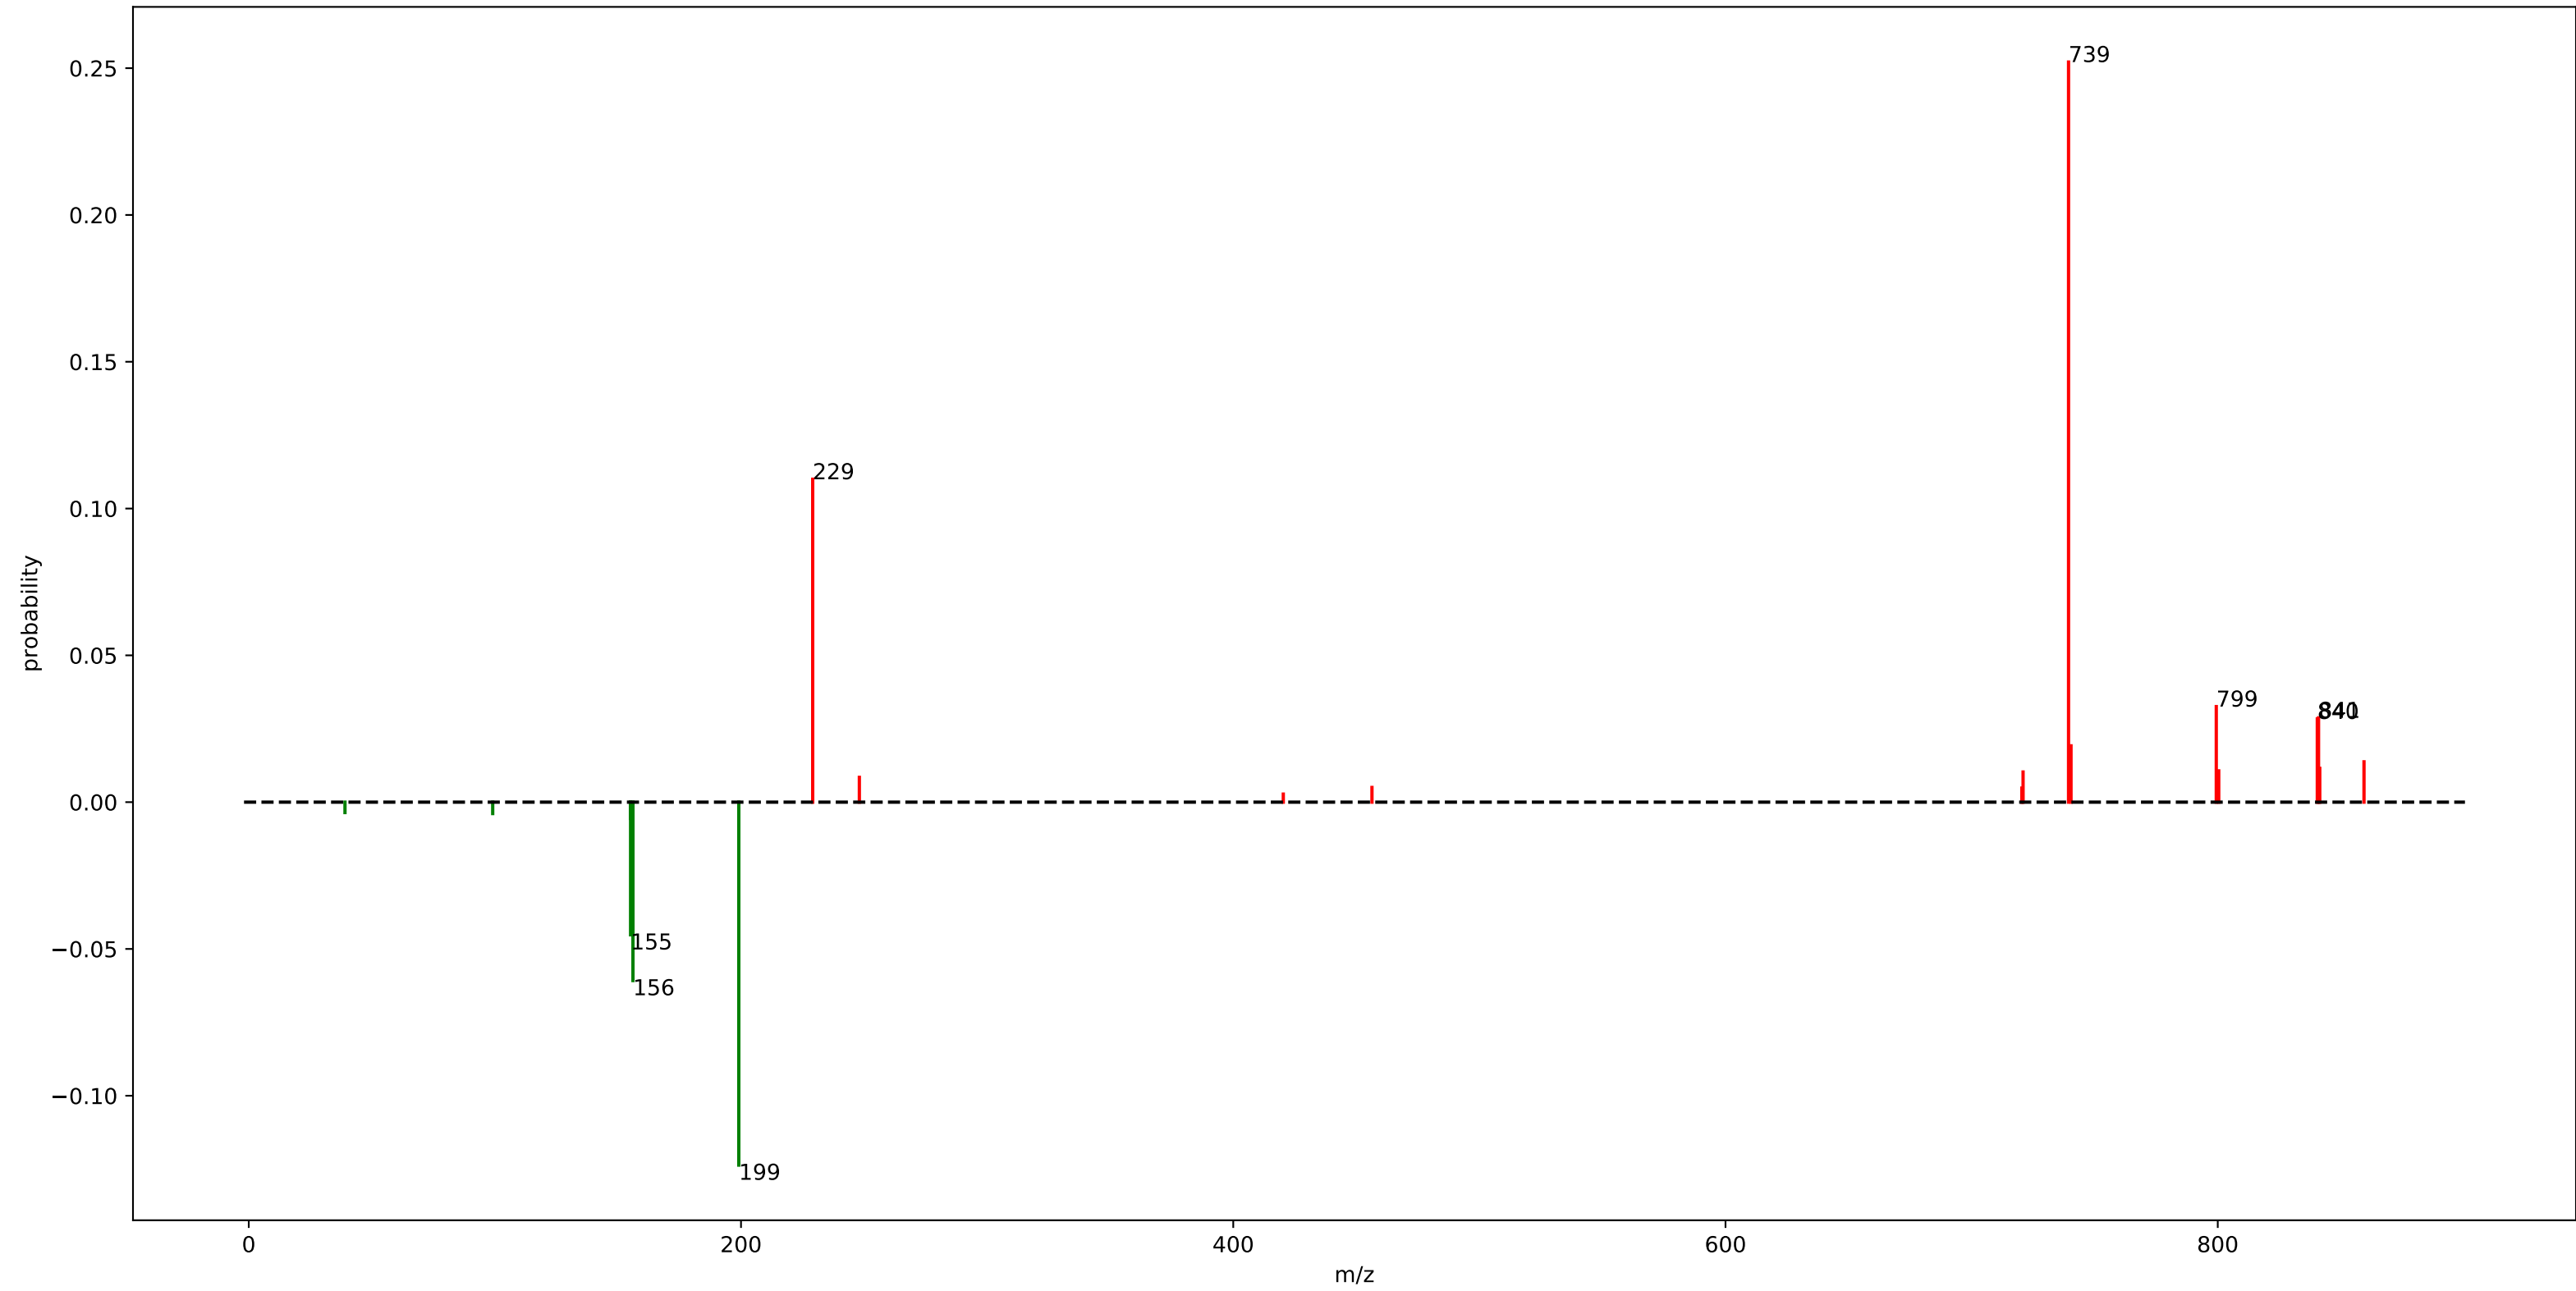

## motif\_634

|                   |        |
|-------------------|--------|
| fragment_739.3725 | : 0.25 |
| loss_199.1025     | : 0.12 |
| fragment_229.1325 | : 0.11 |
| loss_156.0975     | : 0.06 |
| loss_155.1375     | : 0.05 |
| fragment_799.3975 | : 0.03 |
| fragment_840.9475 | : 0.03 |
| fragment_840.4425 | : 0.03 |
| fragment_740.3775 | : 0.02 |
| fragment_859.4175 | : 0.01 |
| fragment_841.4475 | : 0.01 |
| fragment_800.3975 | : 0.01 |
| fragment_720.9025 | : 0.01 |
| fragment_248.0825 | : 0.01 |
| loss_155.0775     | : 0.01 |
| fragment_456.3575 | : 0.01 |

mb\_motif\_9.m2m

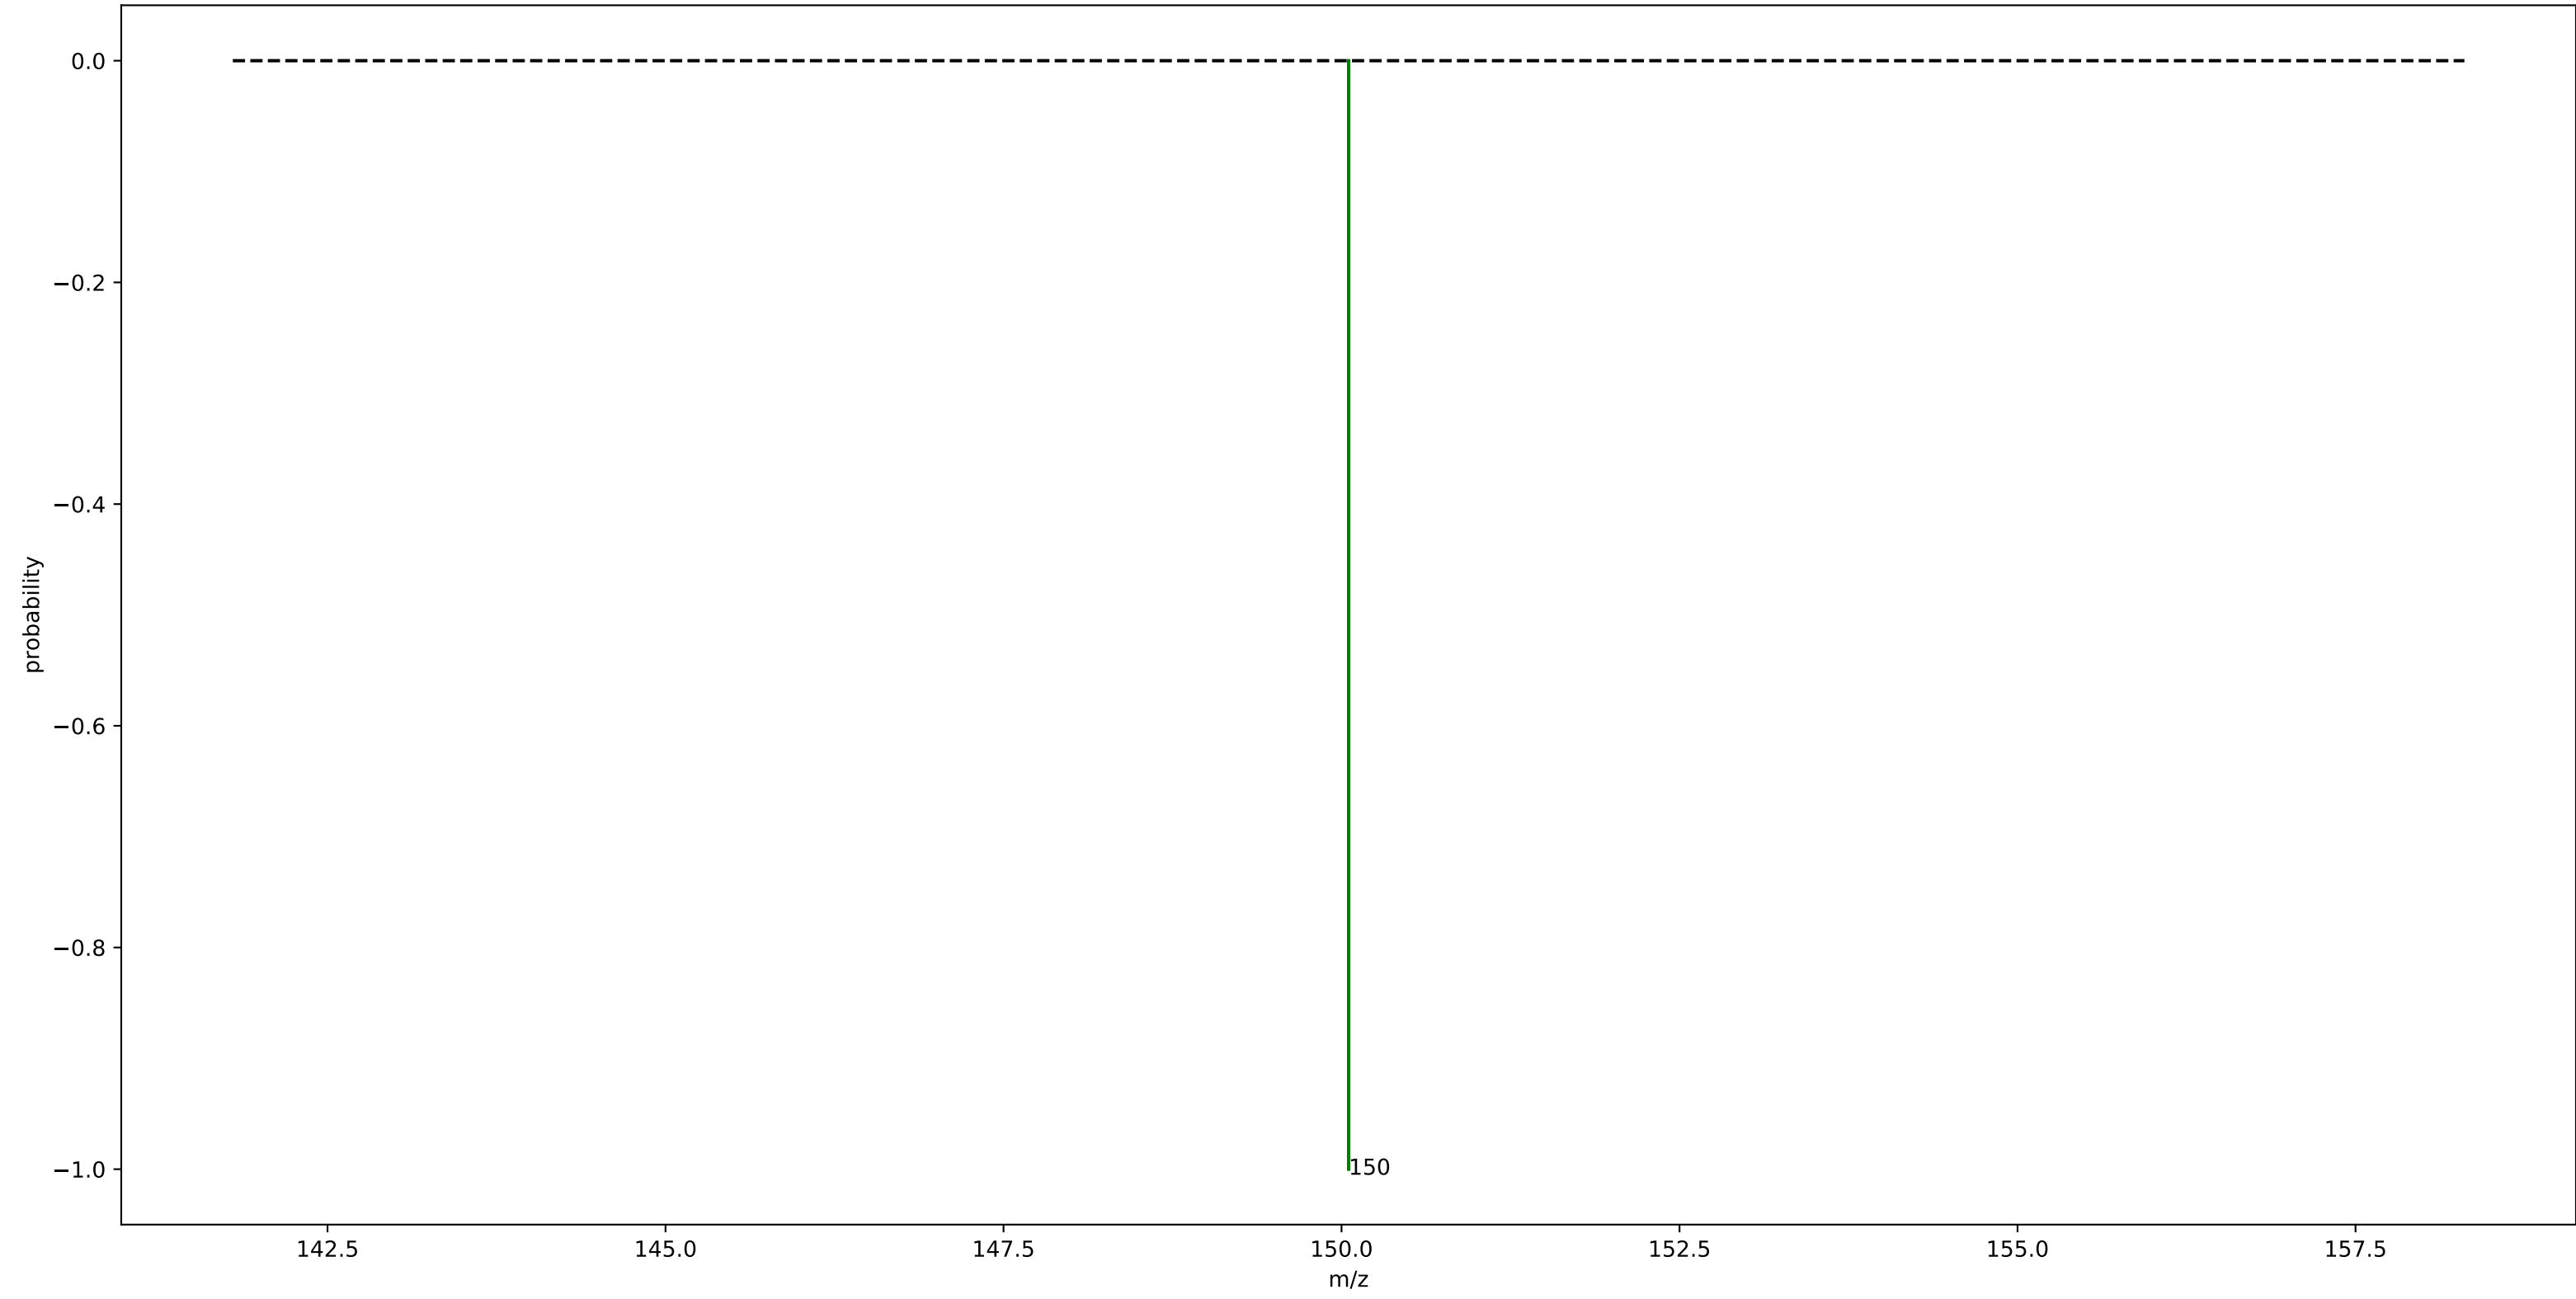

mb\_motif\_9.m2m

loss\_150.0525 : 1.00



motif\_632

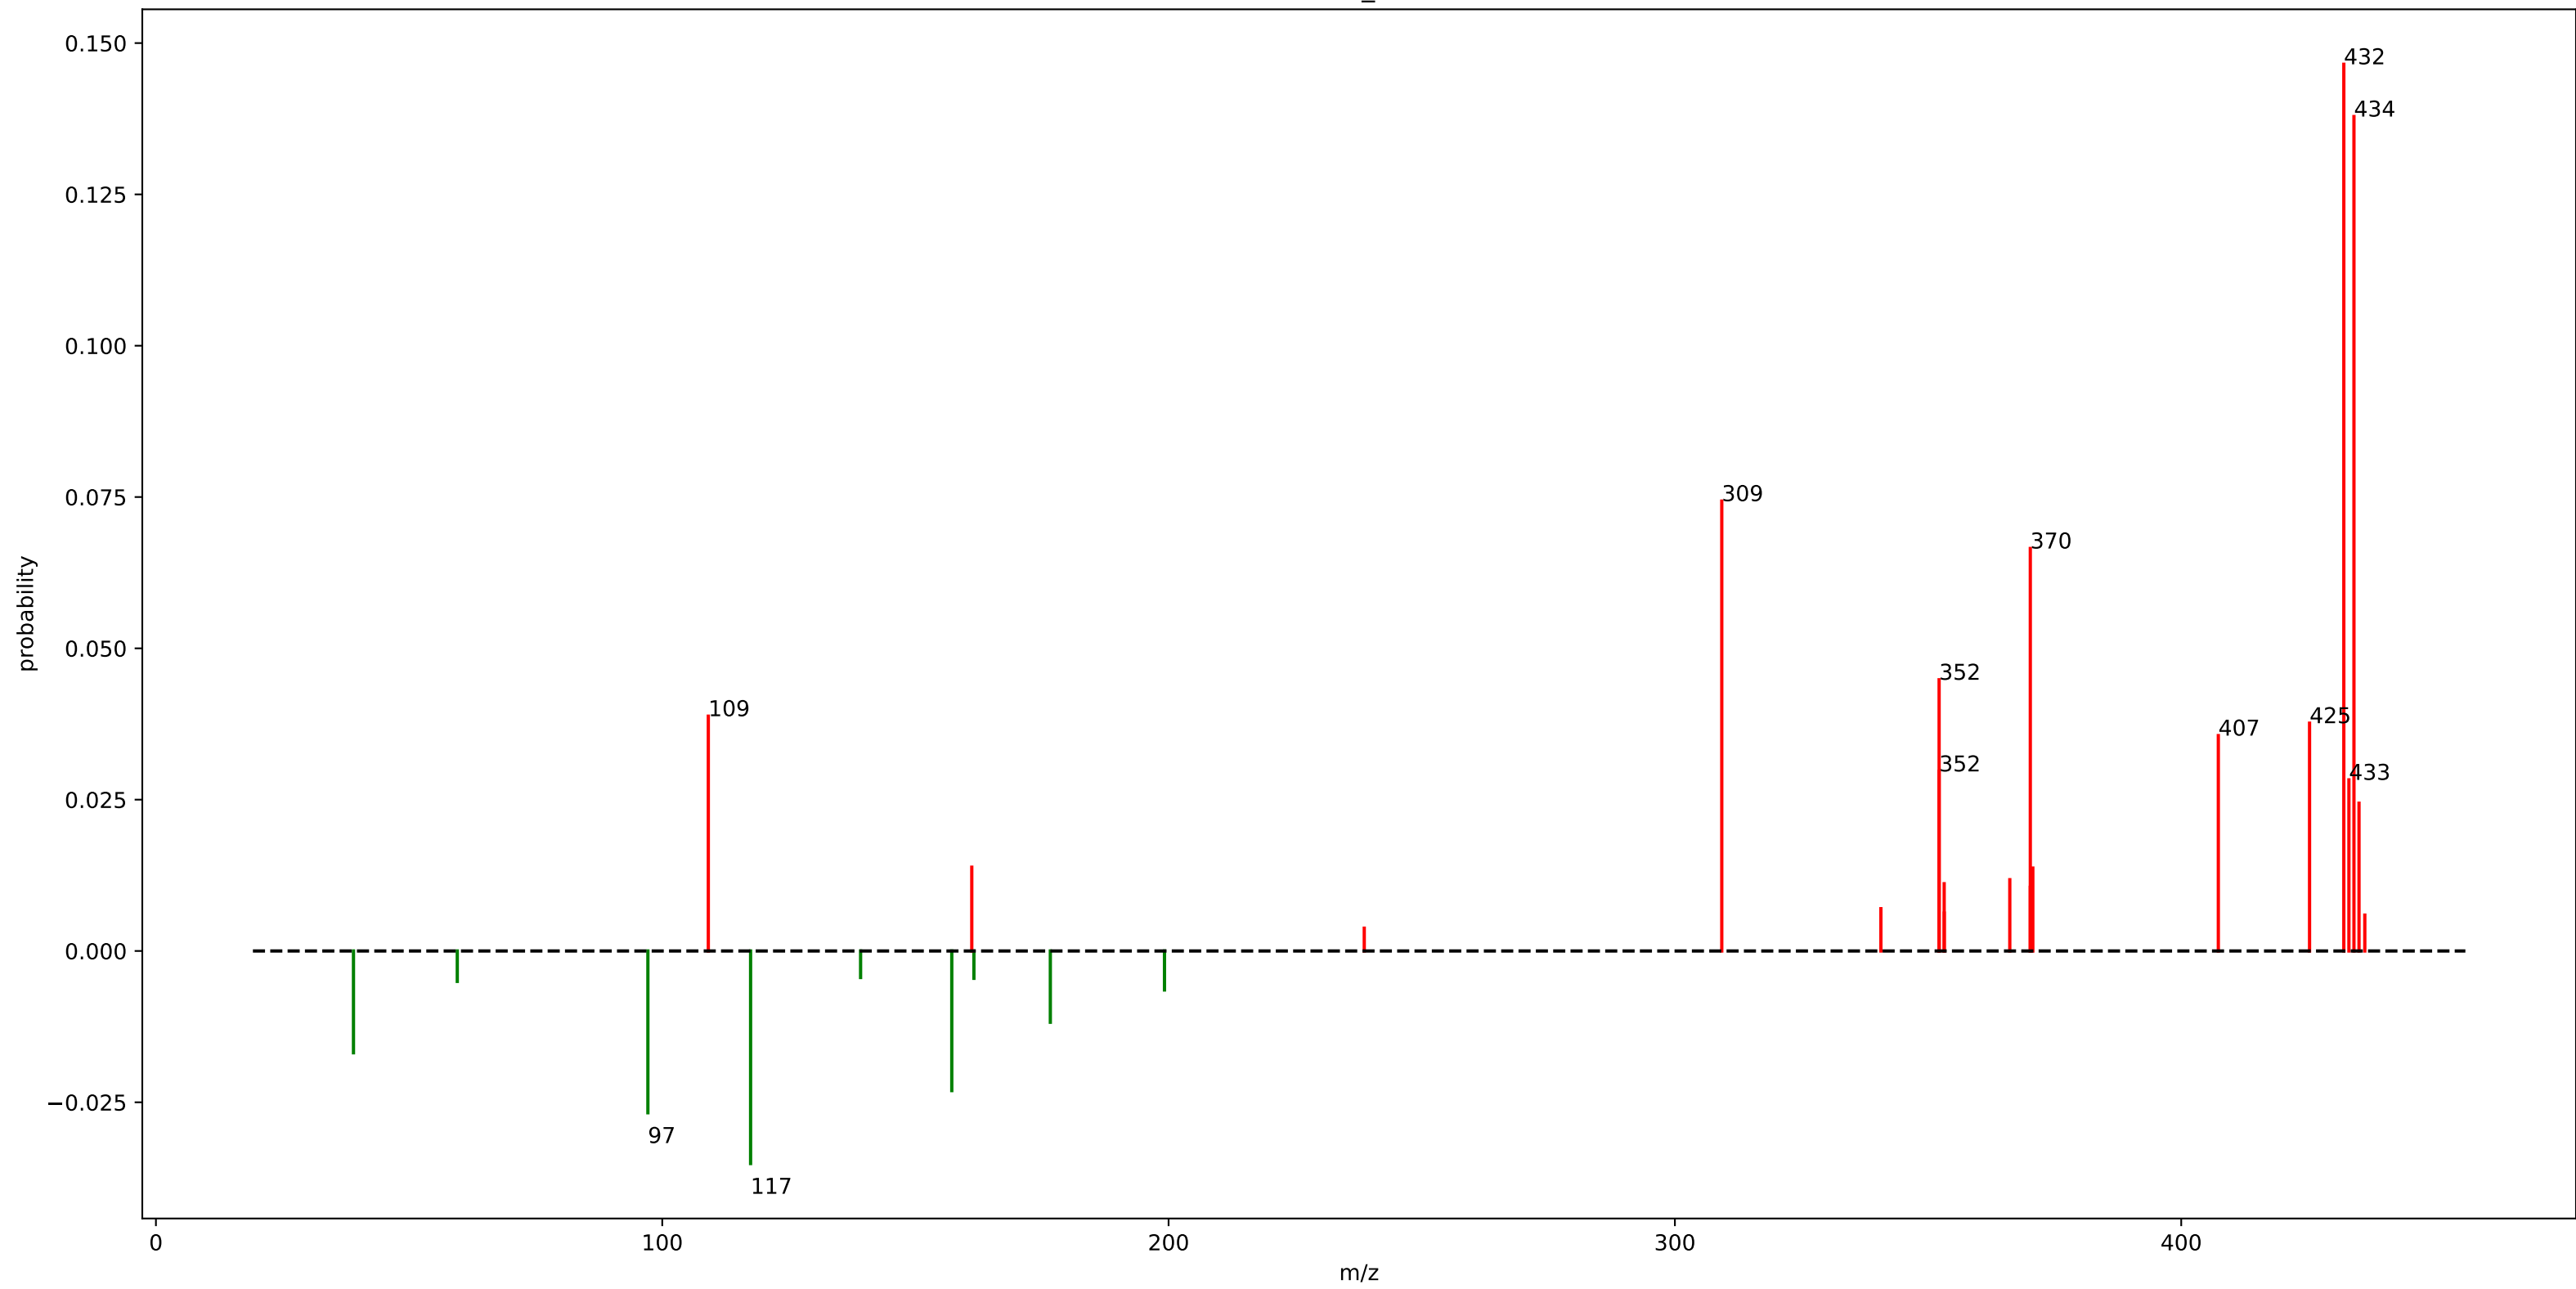

# motif\_632

|                   |        |                   |        |
|-------------------|--------|-------------------|--------|
| fragment_432.1125 | : 0.15 | fragment_370.1875 | : 0.01 |
| fragment_434.1125 | : 0.14 | fragment_340.6825 | : 0.01 |
| fragment_309.2575 | : 0.07 | loss_199.1925     | : 0.01 |
| fragment_370.1925 | : 0.07 | fragment_353.1925 | : 0.01 |
| fragment_352.1825 | : 0.04 | fragment_436.2575 | : 0.01 |
| fragment_109.0975 | : 0.04 | loss_59.5175      | : 0.01 |
| fragment_425.3425 | : 0.04 |                   |        |
| fragment_407.3275 | : 0.04 |                   |        |
| loss_117.4475     | : 0.04 |                   |        |
| fragment_352.1875 | : 0.03 |                   |        |
| fragment_433.1175 | : 0.03 |                   |        |
| loss_97.1625      | : 0.03 |                   |        |
| fragment_435.1125 | : 0.02 |                   |        |
| loss_157.1825     | : 0.02 |                   |        |
| loss_39.0175      | : 0.02 |                   |        |
| fragment_161.1325 | : 0.01 |                   |        |
| fragment_370.6925 | : 0.01 |                   |        |
| loss_176.6475     | : 0.01 |                   |        |
| fragment_366.1425 | : 0.01 |                   |        |
| fragment_353.1825 | : 0.01 |                   |        |

motif\_633

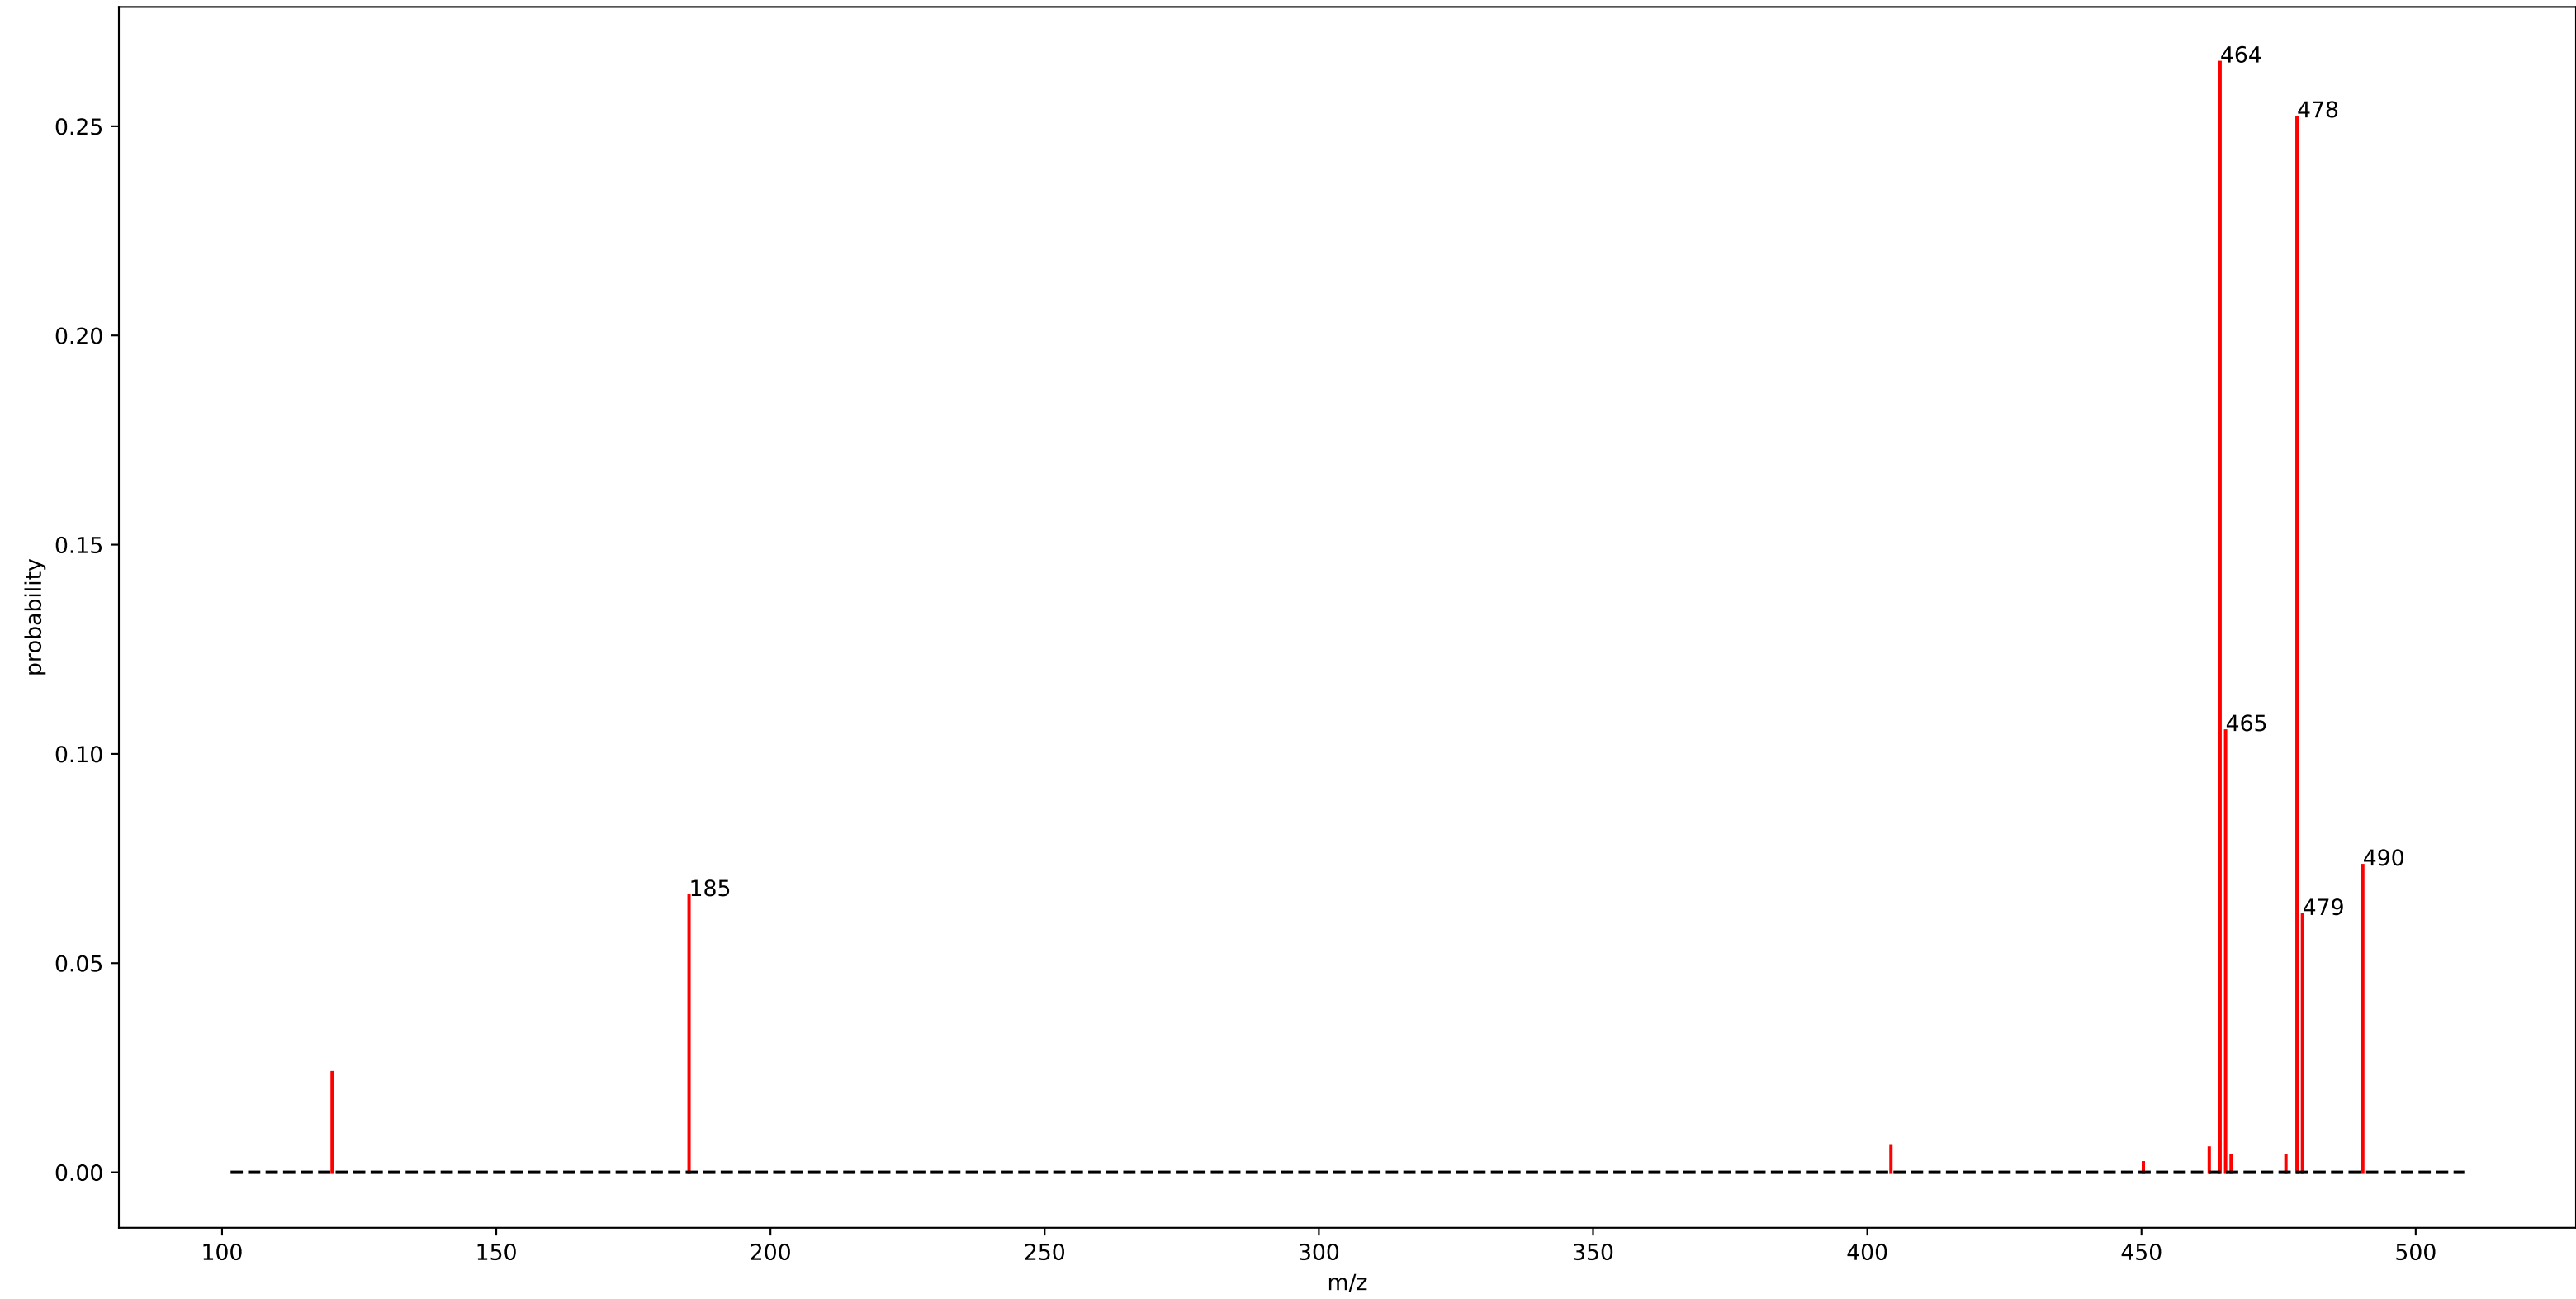

## motif\_633

|                   |        |
|-------------------|--------|
| fragment_464.3325 | : 0.27 |
| fragment_478.3525 | : 0.25 |
| fragment_465.3375 | : 0.11 |
| fragment_490.3525 | : 0.07 |
| fragment_185.1525 | : 0.07 |
| fragment_479.3525 | : 0.06 |
| fragment_120.0675 | : 0.02 |
| fragment_404.3125 | : 0.01 |
| fragment_462.3575 | : 0.01 |

motif\_630

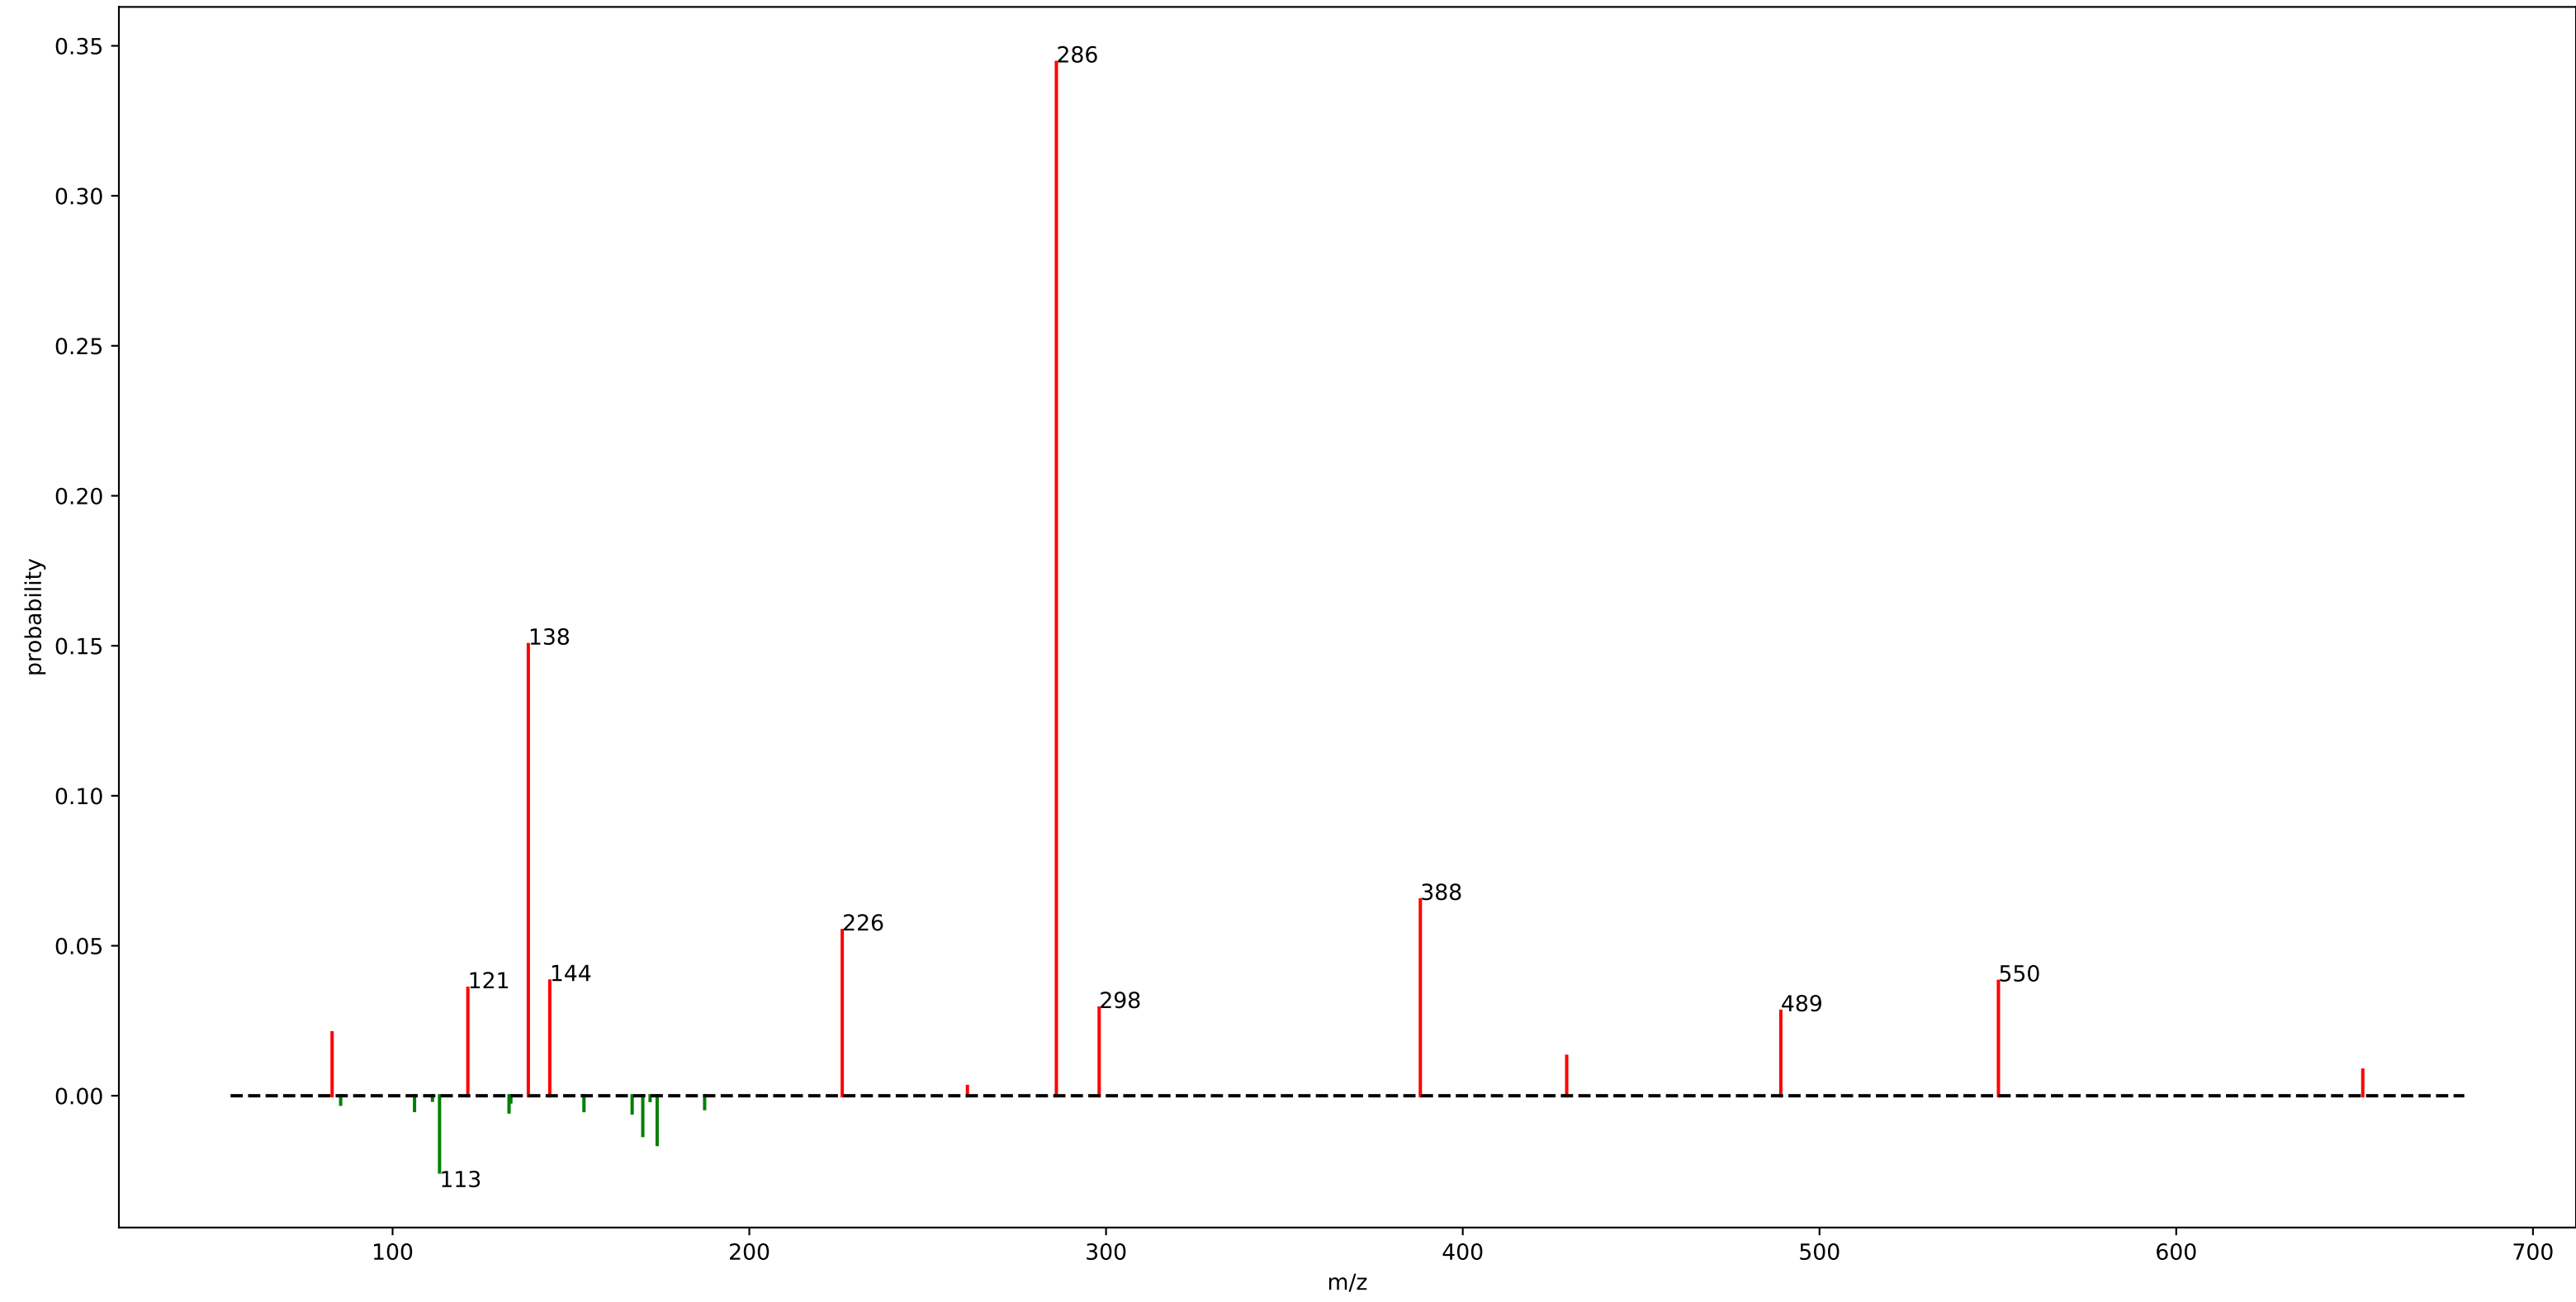

## motif\_630

|                   |        |
|-------------------|--------|
| fragment_286.0775 | : 0.34 |
| fragment_138.0525 | : 0.15 |
| fragment_388.1075 | : 0.07 |
| fragment_226.0525 | : 0.06 |
| fragment_144.0675 | : 0.04 |
| fragment_550.1625 | : 0.04 |
| fragment_121.1025 | : 0.04 |
| fragment_298.0775 | : 0.03 |
| fragment_489.1575 | : 0.03 |
| loss_113.1625     | : 0.03 |
| fragment_83.0475  | : 0.02 |
| loss_174.1675     | : 0.02 |
| loss_170.1375     | : 0.01 |
| fragment_429.1375 | : 0.01 |
| fragment_652.2975 | : 0.01 |
| loss_167.1575     | : 0.01 |
| loss_132.6425     | : 0.01 |

motif\_631

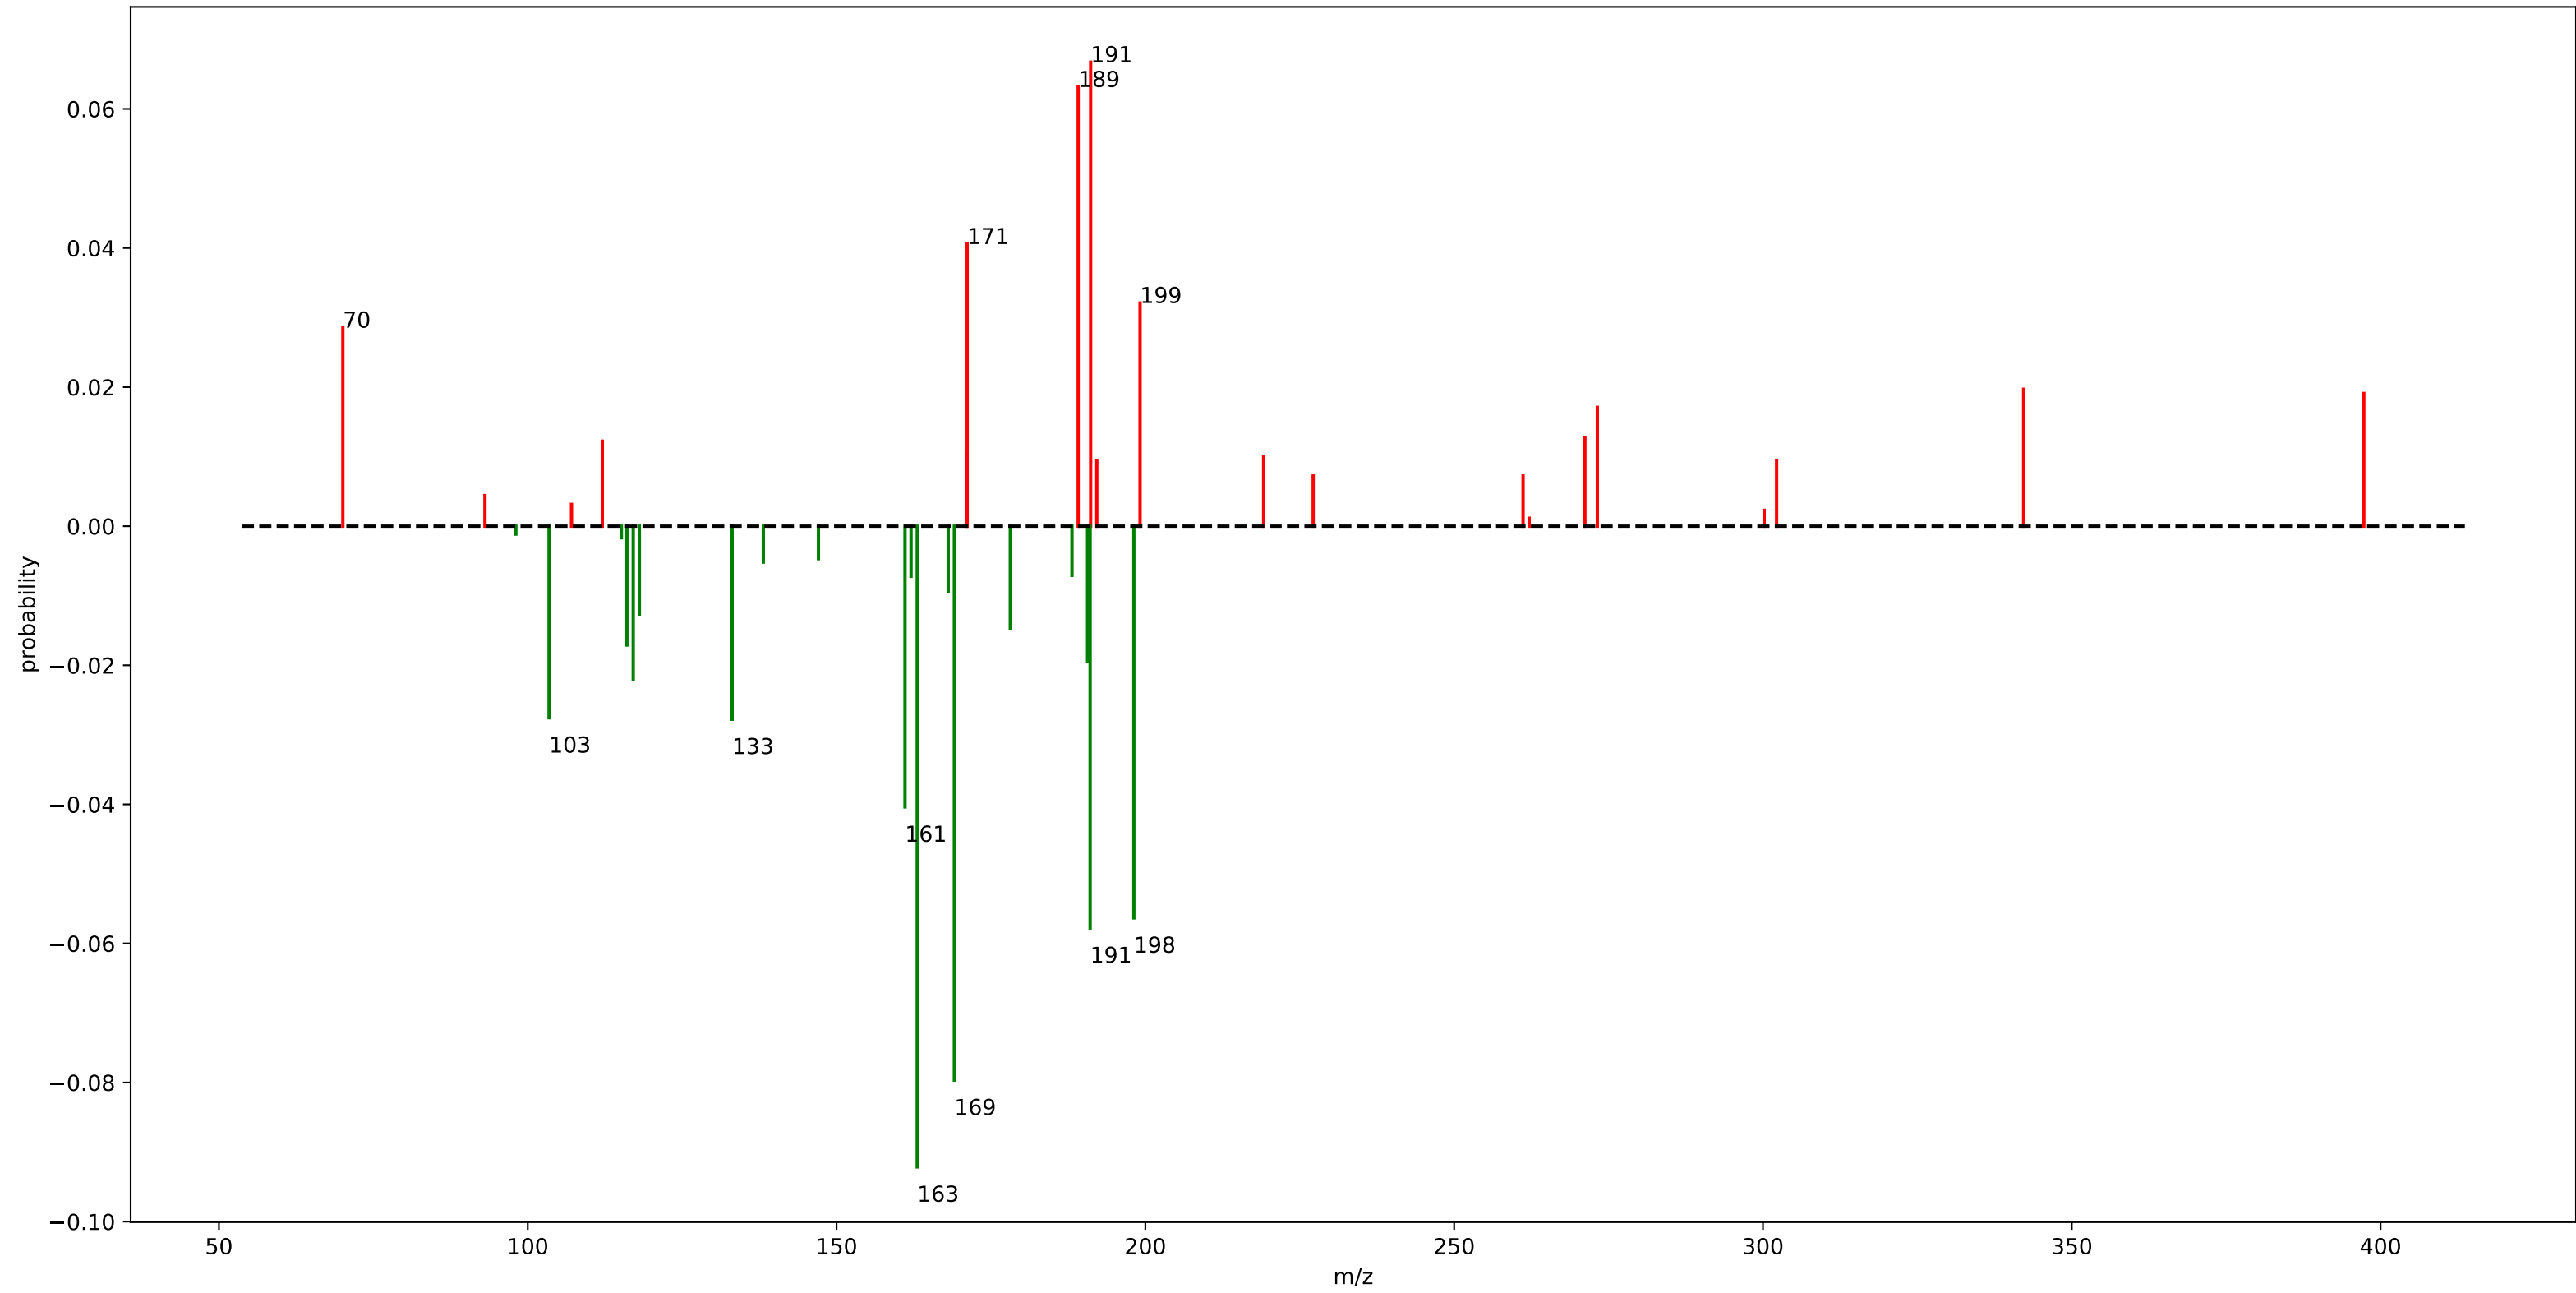

# motif\_631

|                   |        |                   |        |
|-------------------|--------|-------------------|--------|
| loss_163.0625     | : 0.09 | fragment_271.1675 | : 0.01 |
| loss_169.0725     | : 0.08 | fragment_112.0725 | : 0.01 |
| fragment_191.1425 | : 0.07 | fragment_171.1275 | : 0.01 |
| fragment_189.1225 | : 0.06 | fragment_219.1475 | : 0.01 |
| loss_191.0575     | : 0.06 | fragment_192.1375 | : 0.01 |
| loss_198.1375     | : 0.06 | loss_168.0775     | : 0.01 |
| fragment_171.1475 | : 0.04 | fragment_302.2075 | : 0.01 |
| loss_161.0825     | : 0.04 | loss_162.0625     | : 0.01 |
| fragment_199.1425 | : 0.03 | fragment_227.1725 | : 0.01 |
| fragment_70.0625  | : 0.03 | fragment_261.1575 | : 0.01 |
| loss_133.0875     | : 0.03 | loss_188.1175     | : 0.01 |
| loss_103.4475     | : 0.03 | loss_138.1425     | : 0.01 |
| loss_117.0775     | : 0.02 |                   |        |
| fragment_342.2025 | : 0.02 |                   |        |
| loss_190.6425     | : 0.02 |                   |        |
| fragment_397.2825 | : 0.02 |                   |        |
| loss_116.0575     | : 0.02 |                   |        |
| fragment_273.1825 | : 0.02 |                   |        |
| loss_178.1325     | : 0.01 |                   |        |
| loss_118.0725     | : 0.01 |                   |        |



motif\_665

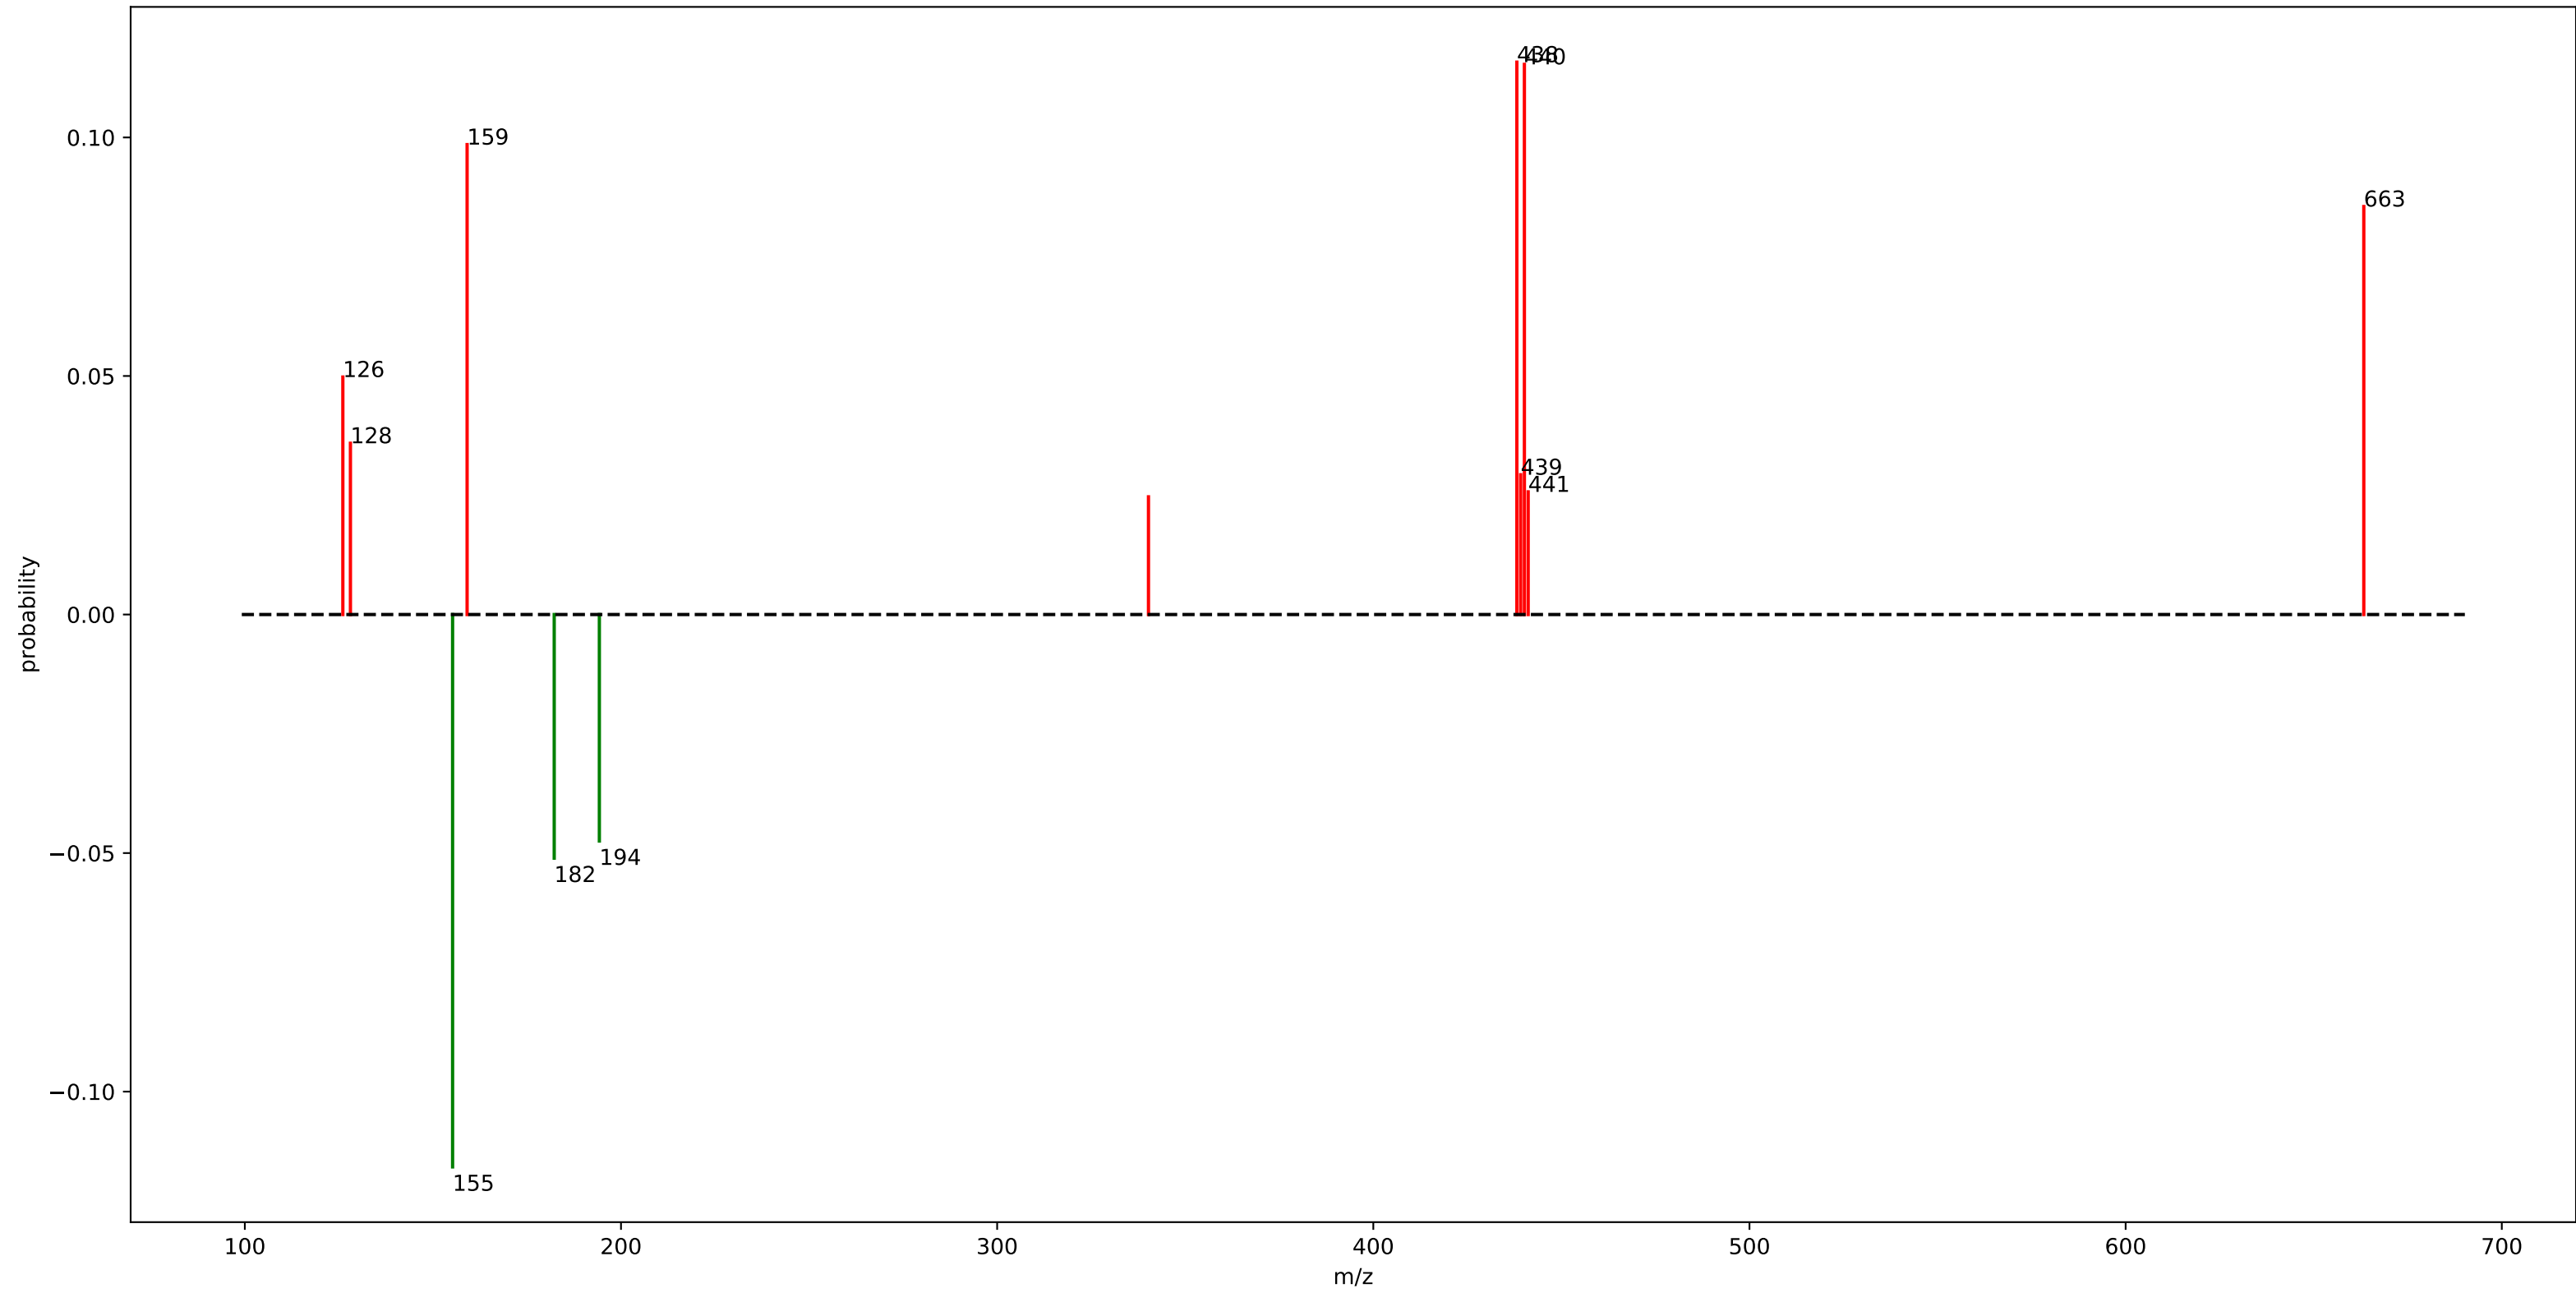

## motif\_665

|                   |        |
|-------------------|--------|
| fragment_438.1625 | : 0.12 |
| loss_155.2325     | : 0.12 |
| fragment_440.1625 | : 0.12 |
| fragment_159.0925 | : 0.10 |
| fragment_663.3125 | : 0.09 |
| loss_182.2475     | : 0.05 |
| fragment_126.0575 | : 0.05 |
| loss_194.2475     | : 0.05 |
| fragment_128.0725 | : 0.04 |
| fragment_439.1675 | : 0.03 |
| fragment_441.1675 | : 0.03 |
| fragment_340.2275 | : 0.02 |

urine\_mass2motif\_211.m2m

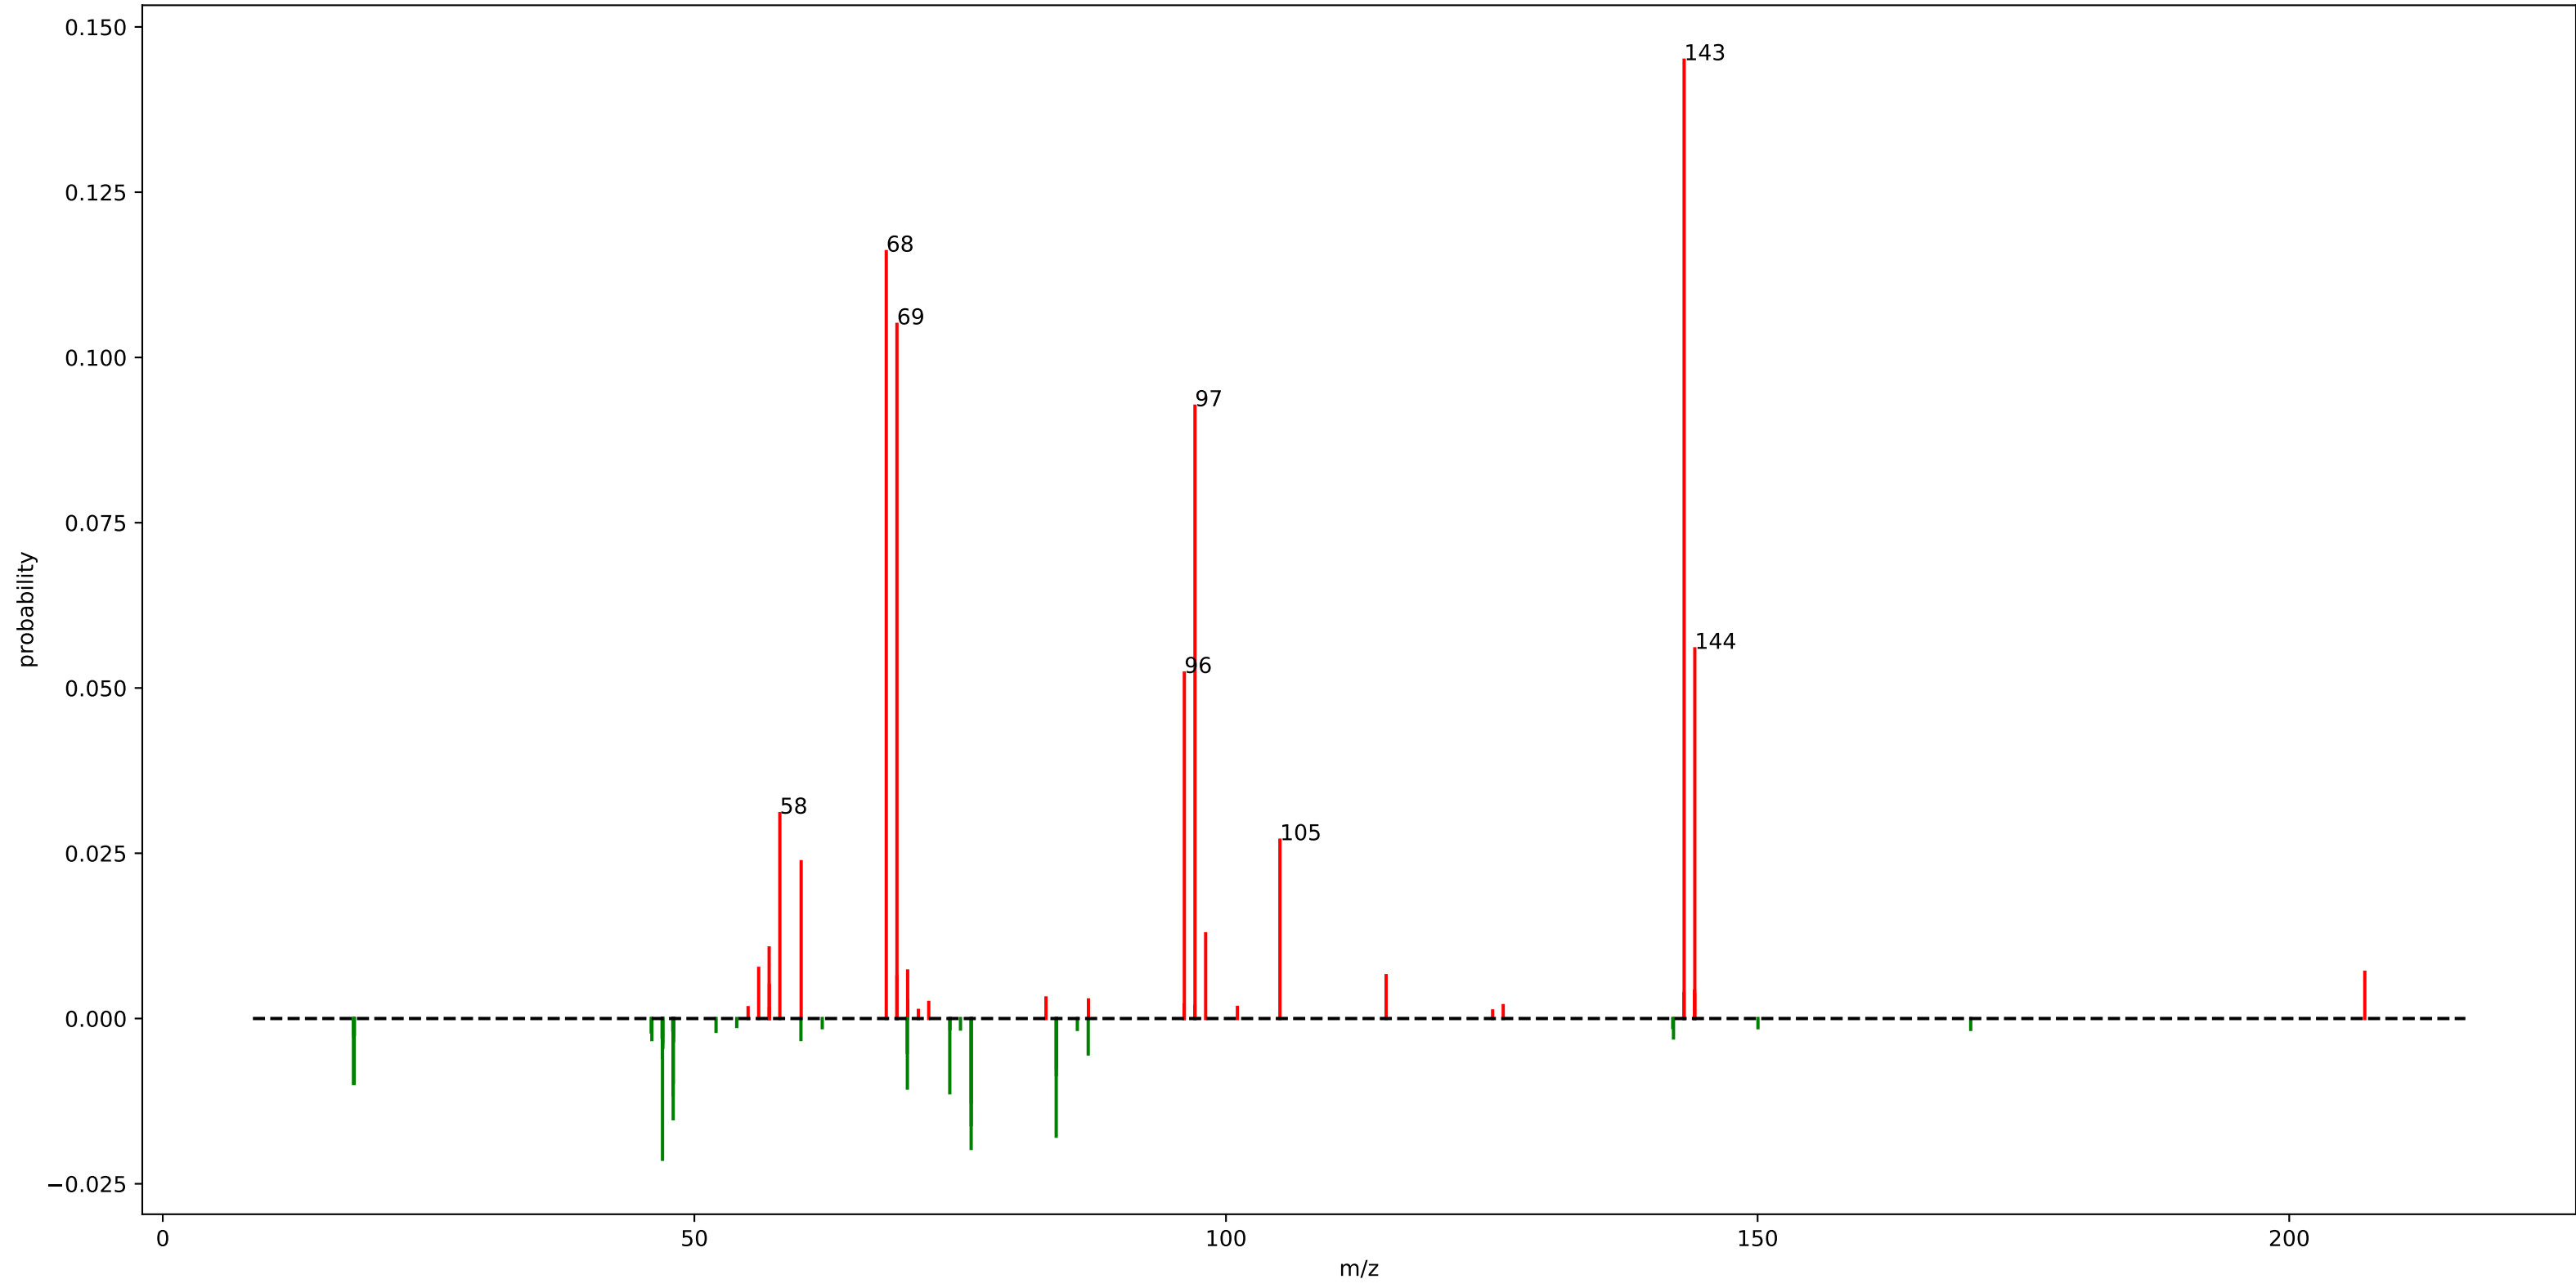

# urine\_mass2motif\_211.m2m

|                   |        |                   |        |
|-------------------|--------|-------------------|--------|
| fragment_143.0875 | : 0.14 | loss_17.9375      | : 0.01 |
| fragment_68.0475  | : 0.12 | loss_18.0025      | : 0.01 |
| fragment_69.0525  | : 0.11 | loss_48.0125      | : 0.01 |
| fragment_97.0825  | : 0.09 | loss_84.0425      | : 0.01 |
| fragment_144.0925 | : 0.06 | fragment_56.0475  | : 0.01 |
| fragment_96.0825  | : 0.05 | loss_84.0525      | : 0.01 |
| fragment_58.0375  | : 0.03 | fragment_70.0575  | : 0.01 |
| fragment_105.0725 | : 0.03 | fragment_207.1075 | : 0.01 |
| fragment_60.0425  | : 0.02 | fragment_115.0575 | : 0.01 |
| loss_47.0025      | : 0.02 | fragment_69.0475  | : 0.01 |
| loss_76.0325      | : 0.02 | loss_46.9875      | : 0.01 |
| loss_84.0325      | : 0.02 | loss_87.0425      | : 0.01 |
| loss_76.0375      | : 0.02 | loss_70.0175      | : 0.01 |
| loss_48.0075      | : 0.02 |                   |        |
| fragment_98.0875  | : 0.01 |                   |        |
| loss_76.0425      | : 0.01 |                   |        |
| loss_47.9975      | : 0.01 |                   |        |
| loss_74.0225      | : 0.01 |                   |        |
| fragment_57.0325  | : 0.01 |                   |        |
| loss_70.0325      | : 0.01 |                   |        |

StrepSalini\_motif\_8.m2m

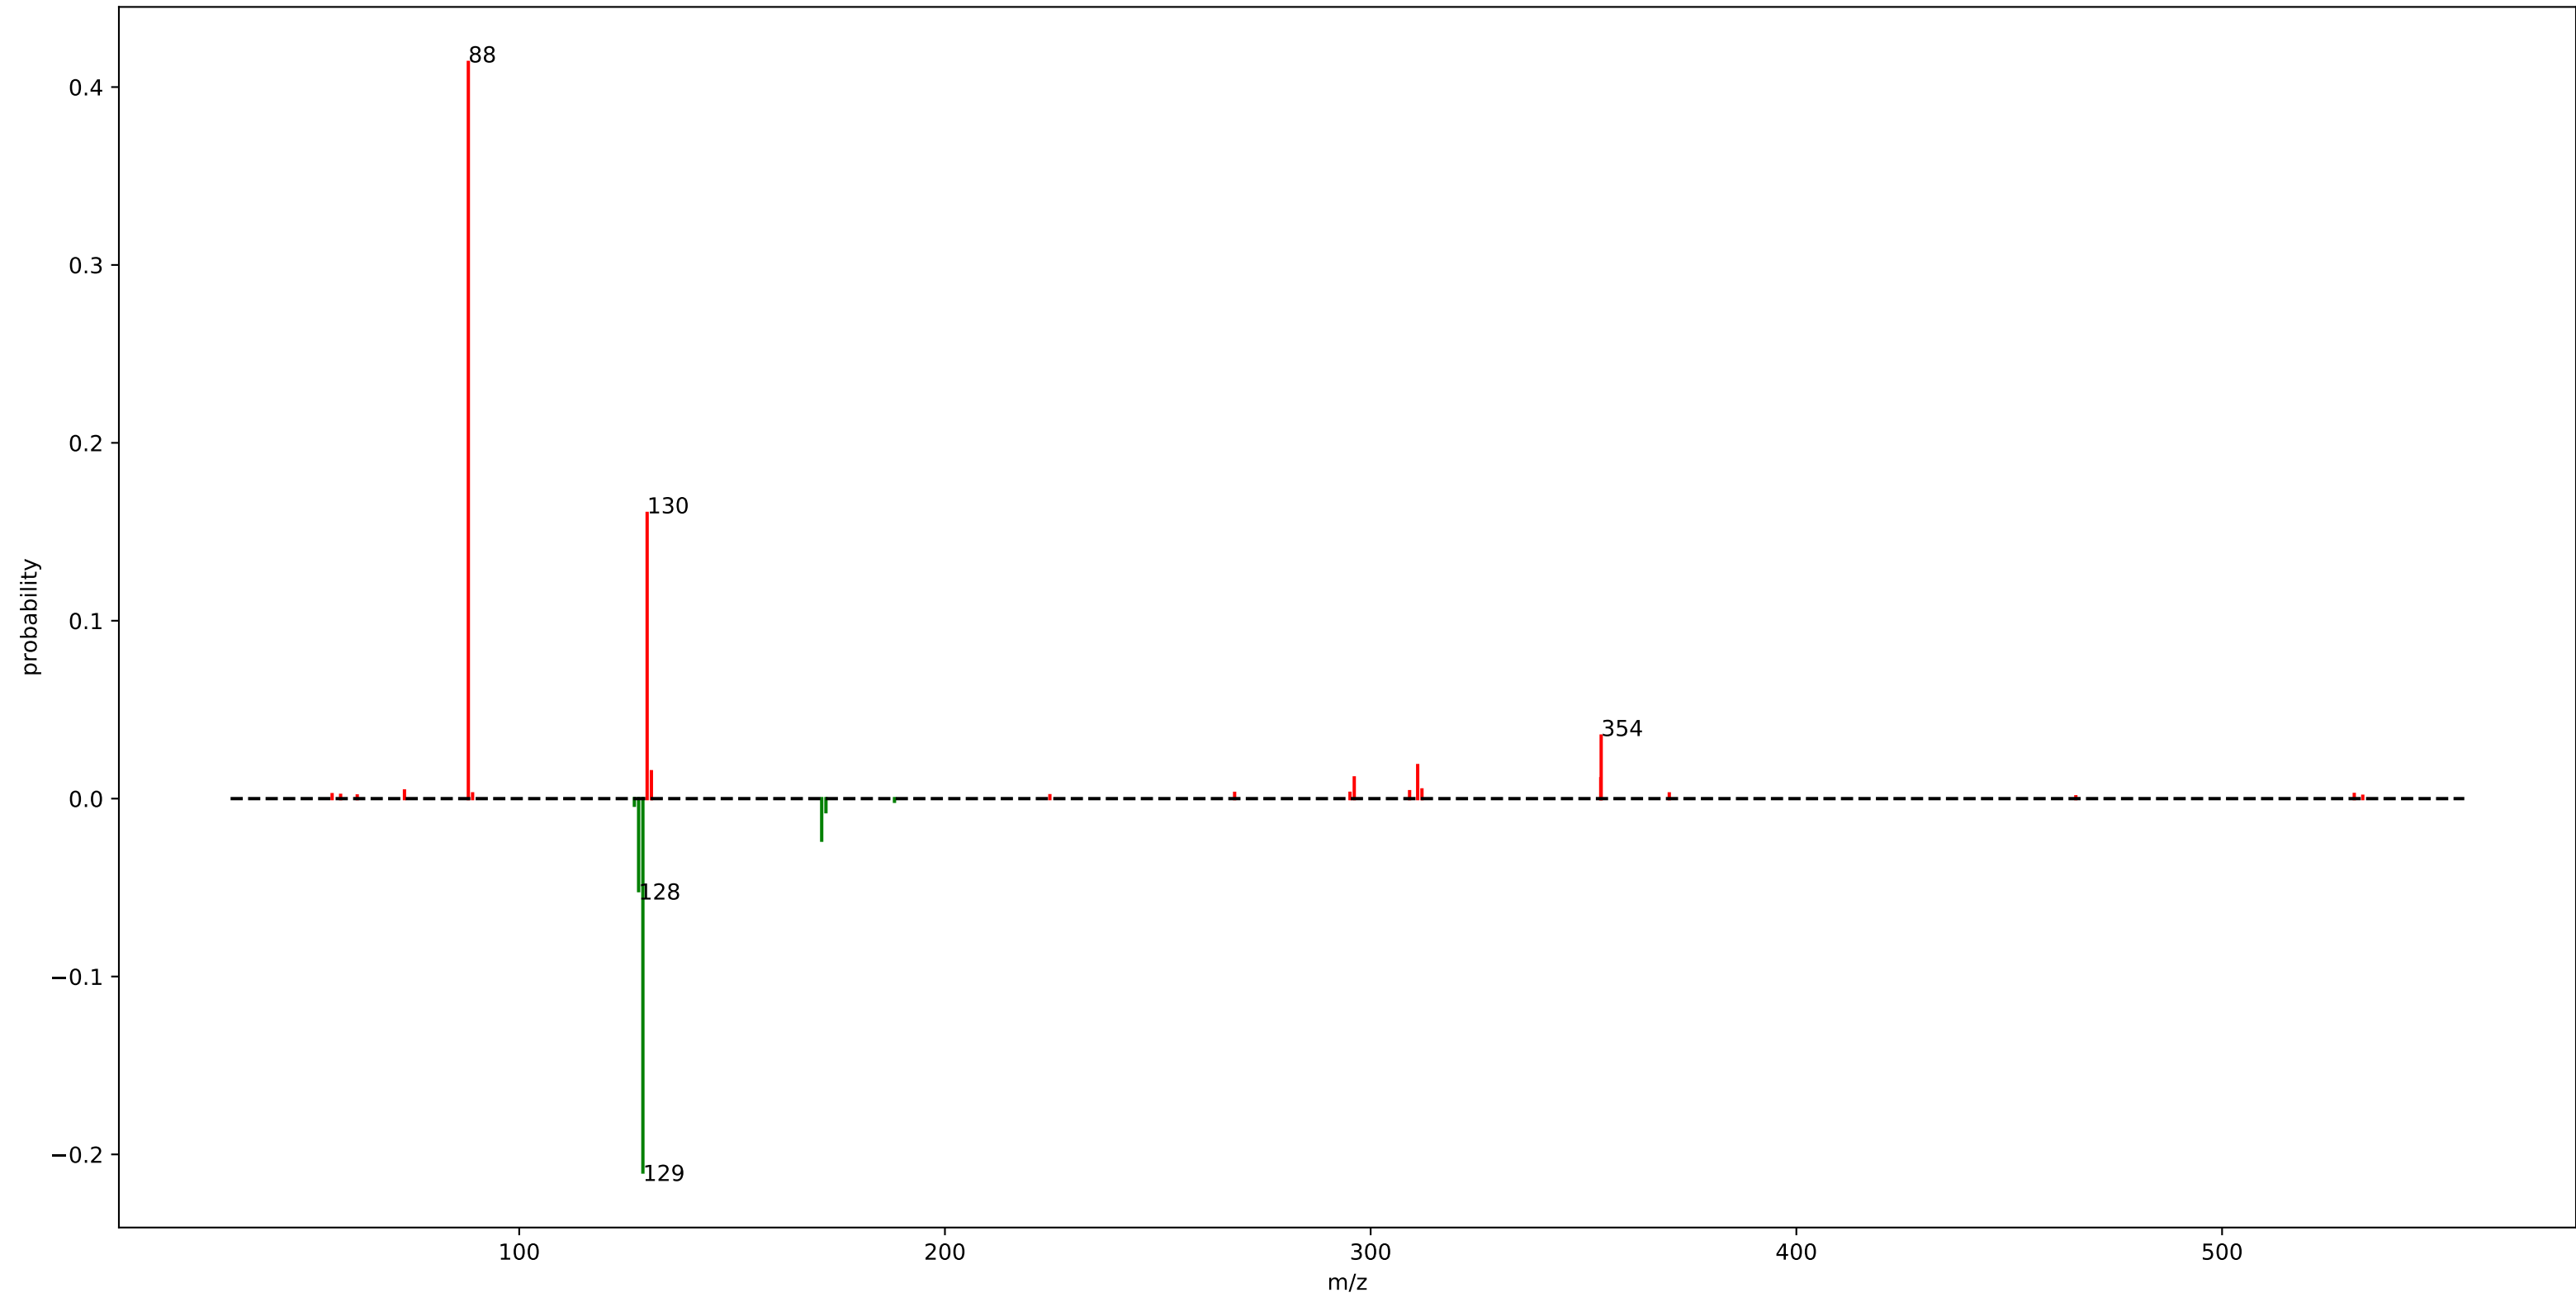

## StrepSalini\_motif\_8.m2m

|                   |        |
|-------------------|--------|
| fragment_88.0500  | : 0.41 |
| loss_129.0525     | : 0.21 |
| fragment_130.0500 | : 0.16 |
| loss_128.0500     | : 0.05 |
| fragment_354.1500 | : 0.04 |
| loss_171.0525     | : 0.02 |
| fragment_311.0500 | : 0.02 |
| fragment_131.0500 | : 0.02 |
| fragment_296.1500 | : 0.01 |
| fragment_354.0500 | : 0.01 |
| loss_172.0500     | : 0.01 |

rhabdus\_motif\_95.m2m

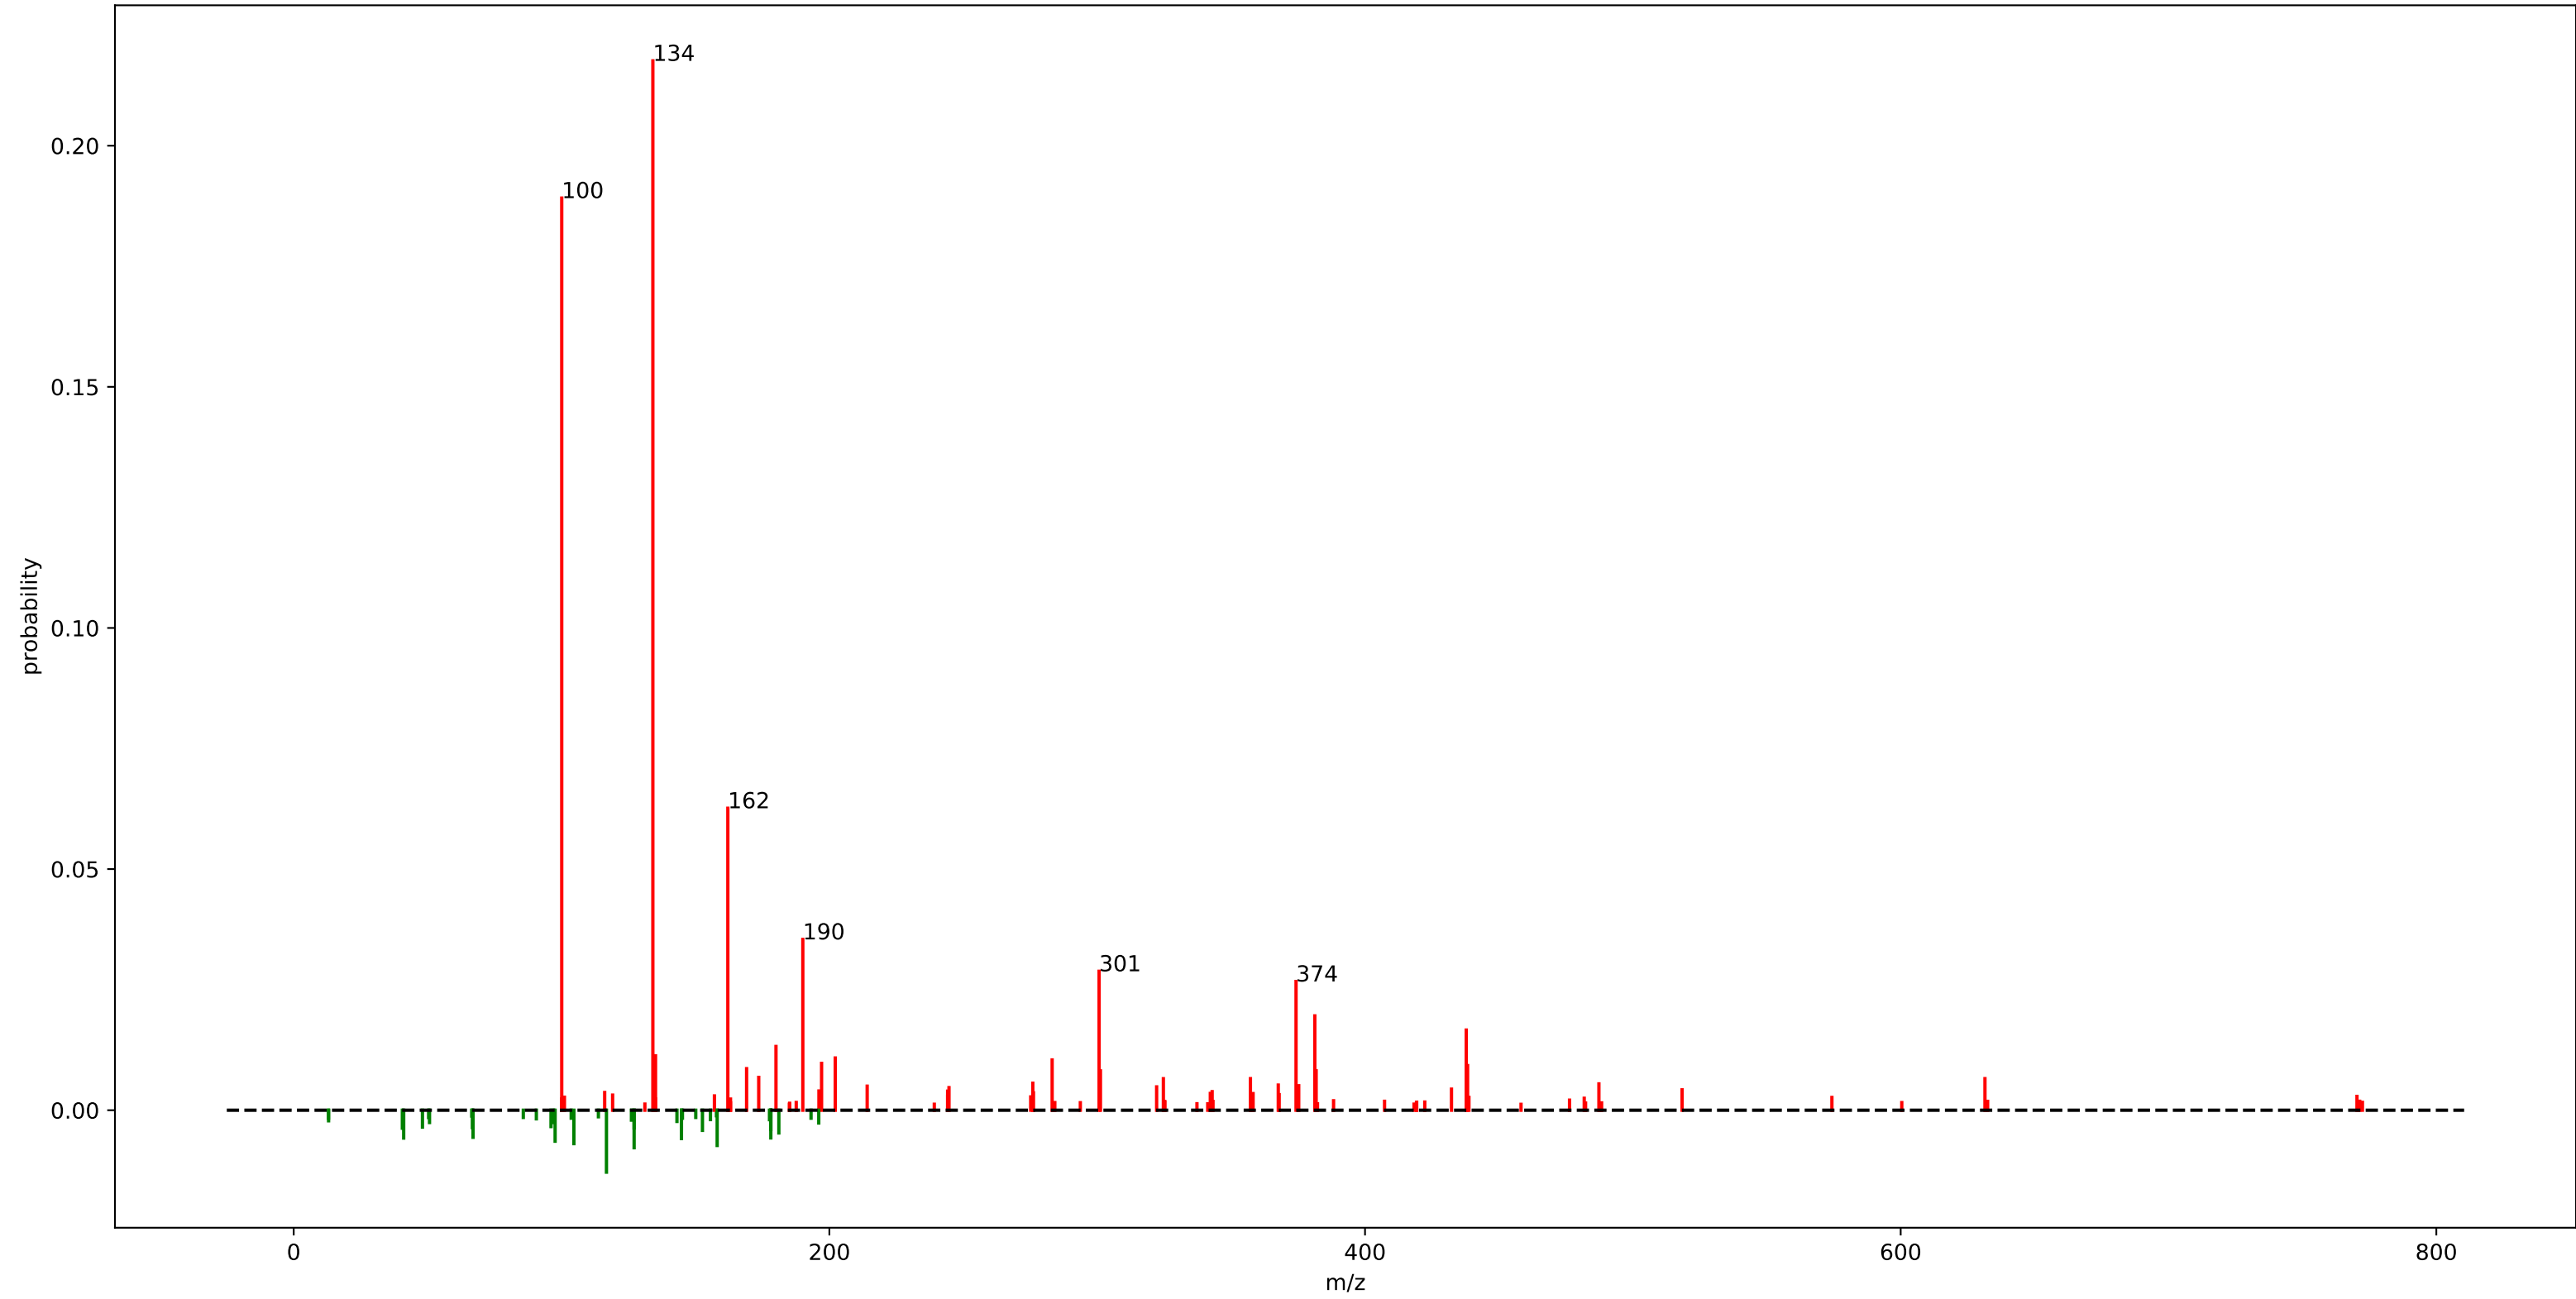

# rhabdus\_motif\_95.m2m

|                   |        |                   |        |
|-------------------|--------|-------------------|--------|
| fragment_134.0975 | : 0.22 | loss_104.6125     | : 0.01 |
| fragment_100.0725 | : 0.19 | fragment_173.6275 | : 0.01 |
| fragment_162.0925 | : 0.06 | fragment_631.4675 | : 0.01 |
| fragment_190.0875 | : 0.04 | fragment_357.2125 | : 0.01 |
| fragment_300.7075 | : 0.03 | fragment_324.7075 | : 0.01 |
| fragment_374.2425 | : 0.03 | loss_97.6025      | : 0.01 |
| fragment_381.2525 | : 0.02 | loss_144.7725     | : 0.01 |
| fragment_437.7925 | : 0.02 | loss_41.0625      | : 0.01 |
| fragment_180.0675 | : 0.01 | loss_178.1425     | : 0.01 |
| loss_116.7725     | : 0.01 | loss_66.9575      | : 0.01 |
| fragment_135.0975 | : 0.01 | fragment_275.9575 | : 0.01 |
| fragment_202.1925 | : 0.01 | fragment_487.3275 | : 0.01 |
| fragment_283.1775 | : 0.01 | fragment_367.6075 | : 0.01 |
| fragment_197.0925 | : 0.01 | fragment_375.2475 | : 0.01 |
| fragment_438.2975 | : 0.01 |                   |        |
| fragment_169.0975 | : 0.01 |                   |        |
| fragment_381.7525 | : 0.01 |                   |        |
| fragment_301.2125 | : 0.01 |                   |        |
| loss_127.0975     | : 0.01 |                   |        |
| loss_158.1075     | : 0.01 |                   |        |



motif\_639

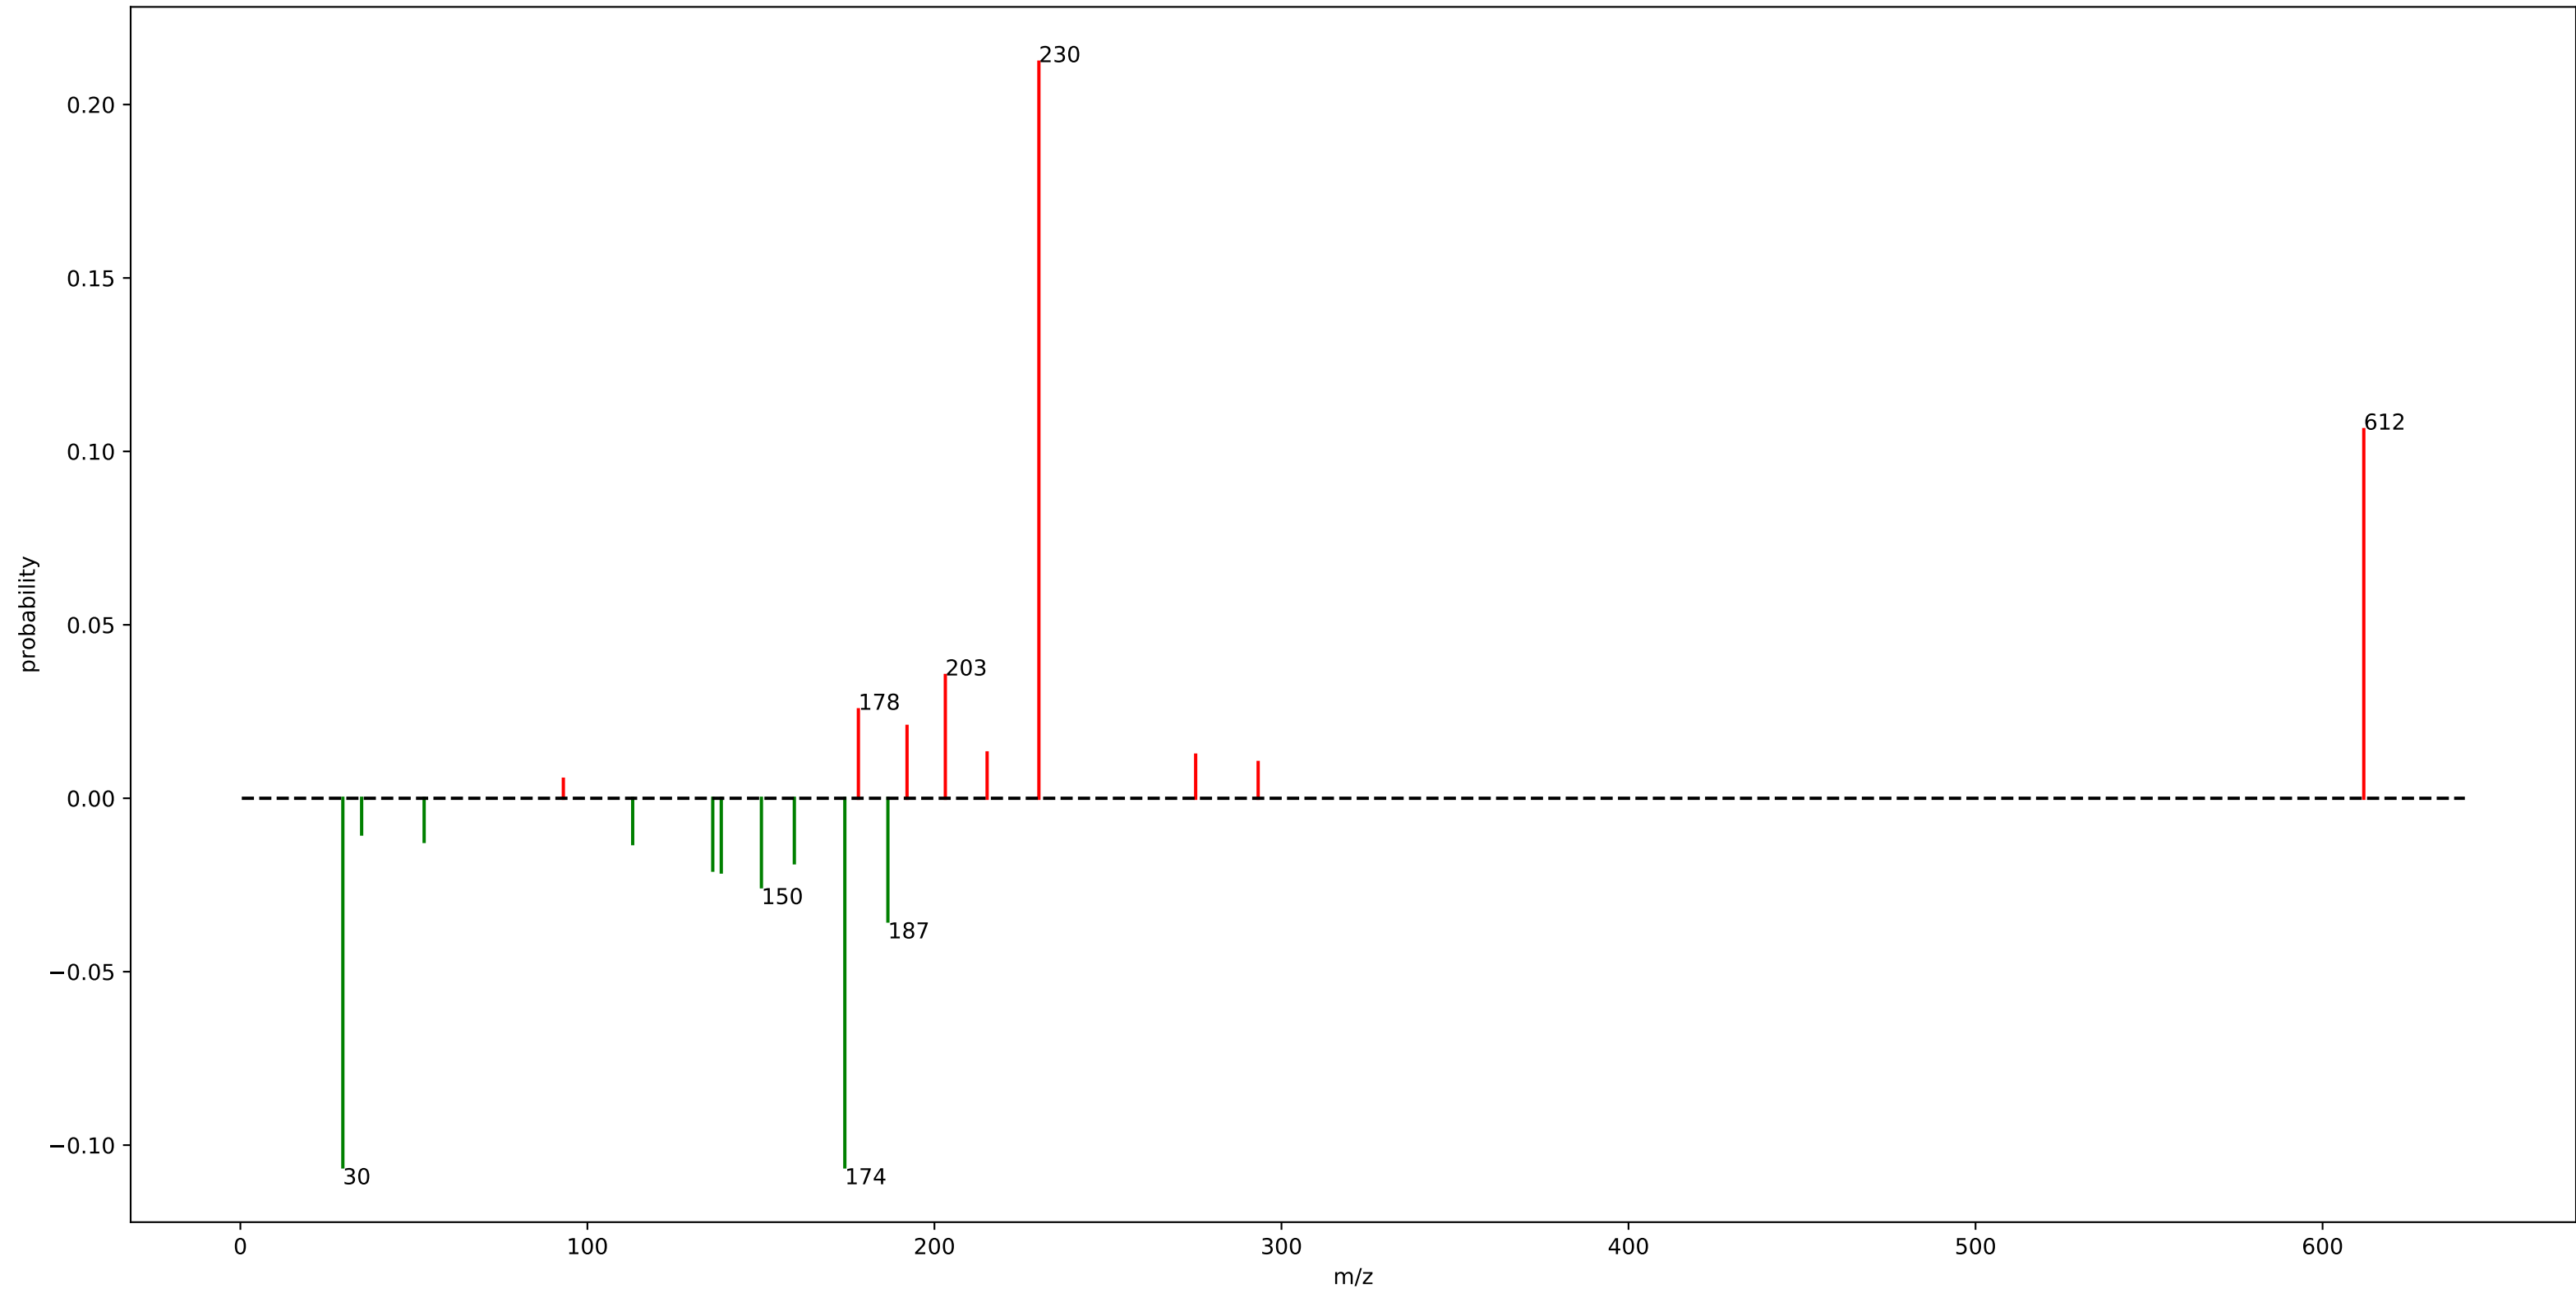

## motif\_639

|                   |        |
|-------------------|--------|
| fragment_230.0975 | : 0.21 |
| loss_174.1775     | : 0.11 |
| loss_29.5275      | : 0.11 |
| fragment_611.8775 | : 0.11 |
| loss_186.5875     | : 0.04 |
| fragment_203.1375 | : 0.04 |
| loss_150.1425     | : 0.03 |
| fragment_178.0875 | : 0.03 |
| loss_138.5725     | : 0.02 |
| loss_136.1225     | : 0.02 |
| fragment_192.1025 | : 0.02 |
| loss_159.6275     | : 0.02 |
| fragment_215.1775 | : 0.01 |
| loss_113.0475     | : 0.01 |
| fragment_275.2725 | : 0.01 |
| loss_52.9525      | : 0.01 |
| loss_34.9425      | : 0.01 |
| fragment_293.2825 | : 0.01 |
| fragment_93.0675  | : 0.01 |

urine\_mass2motif\_246.m2m

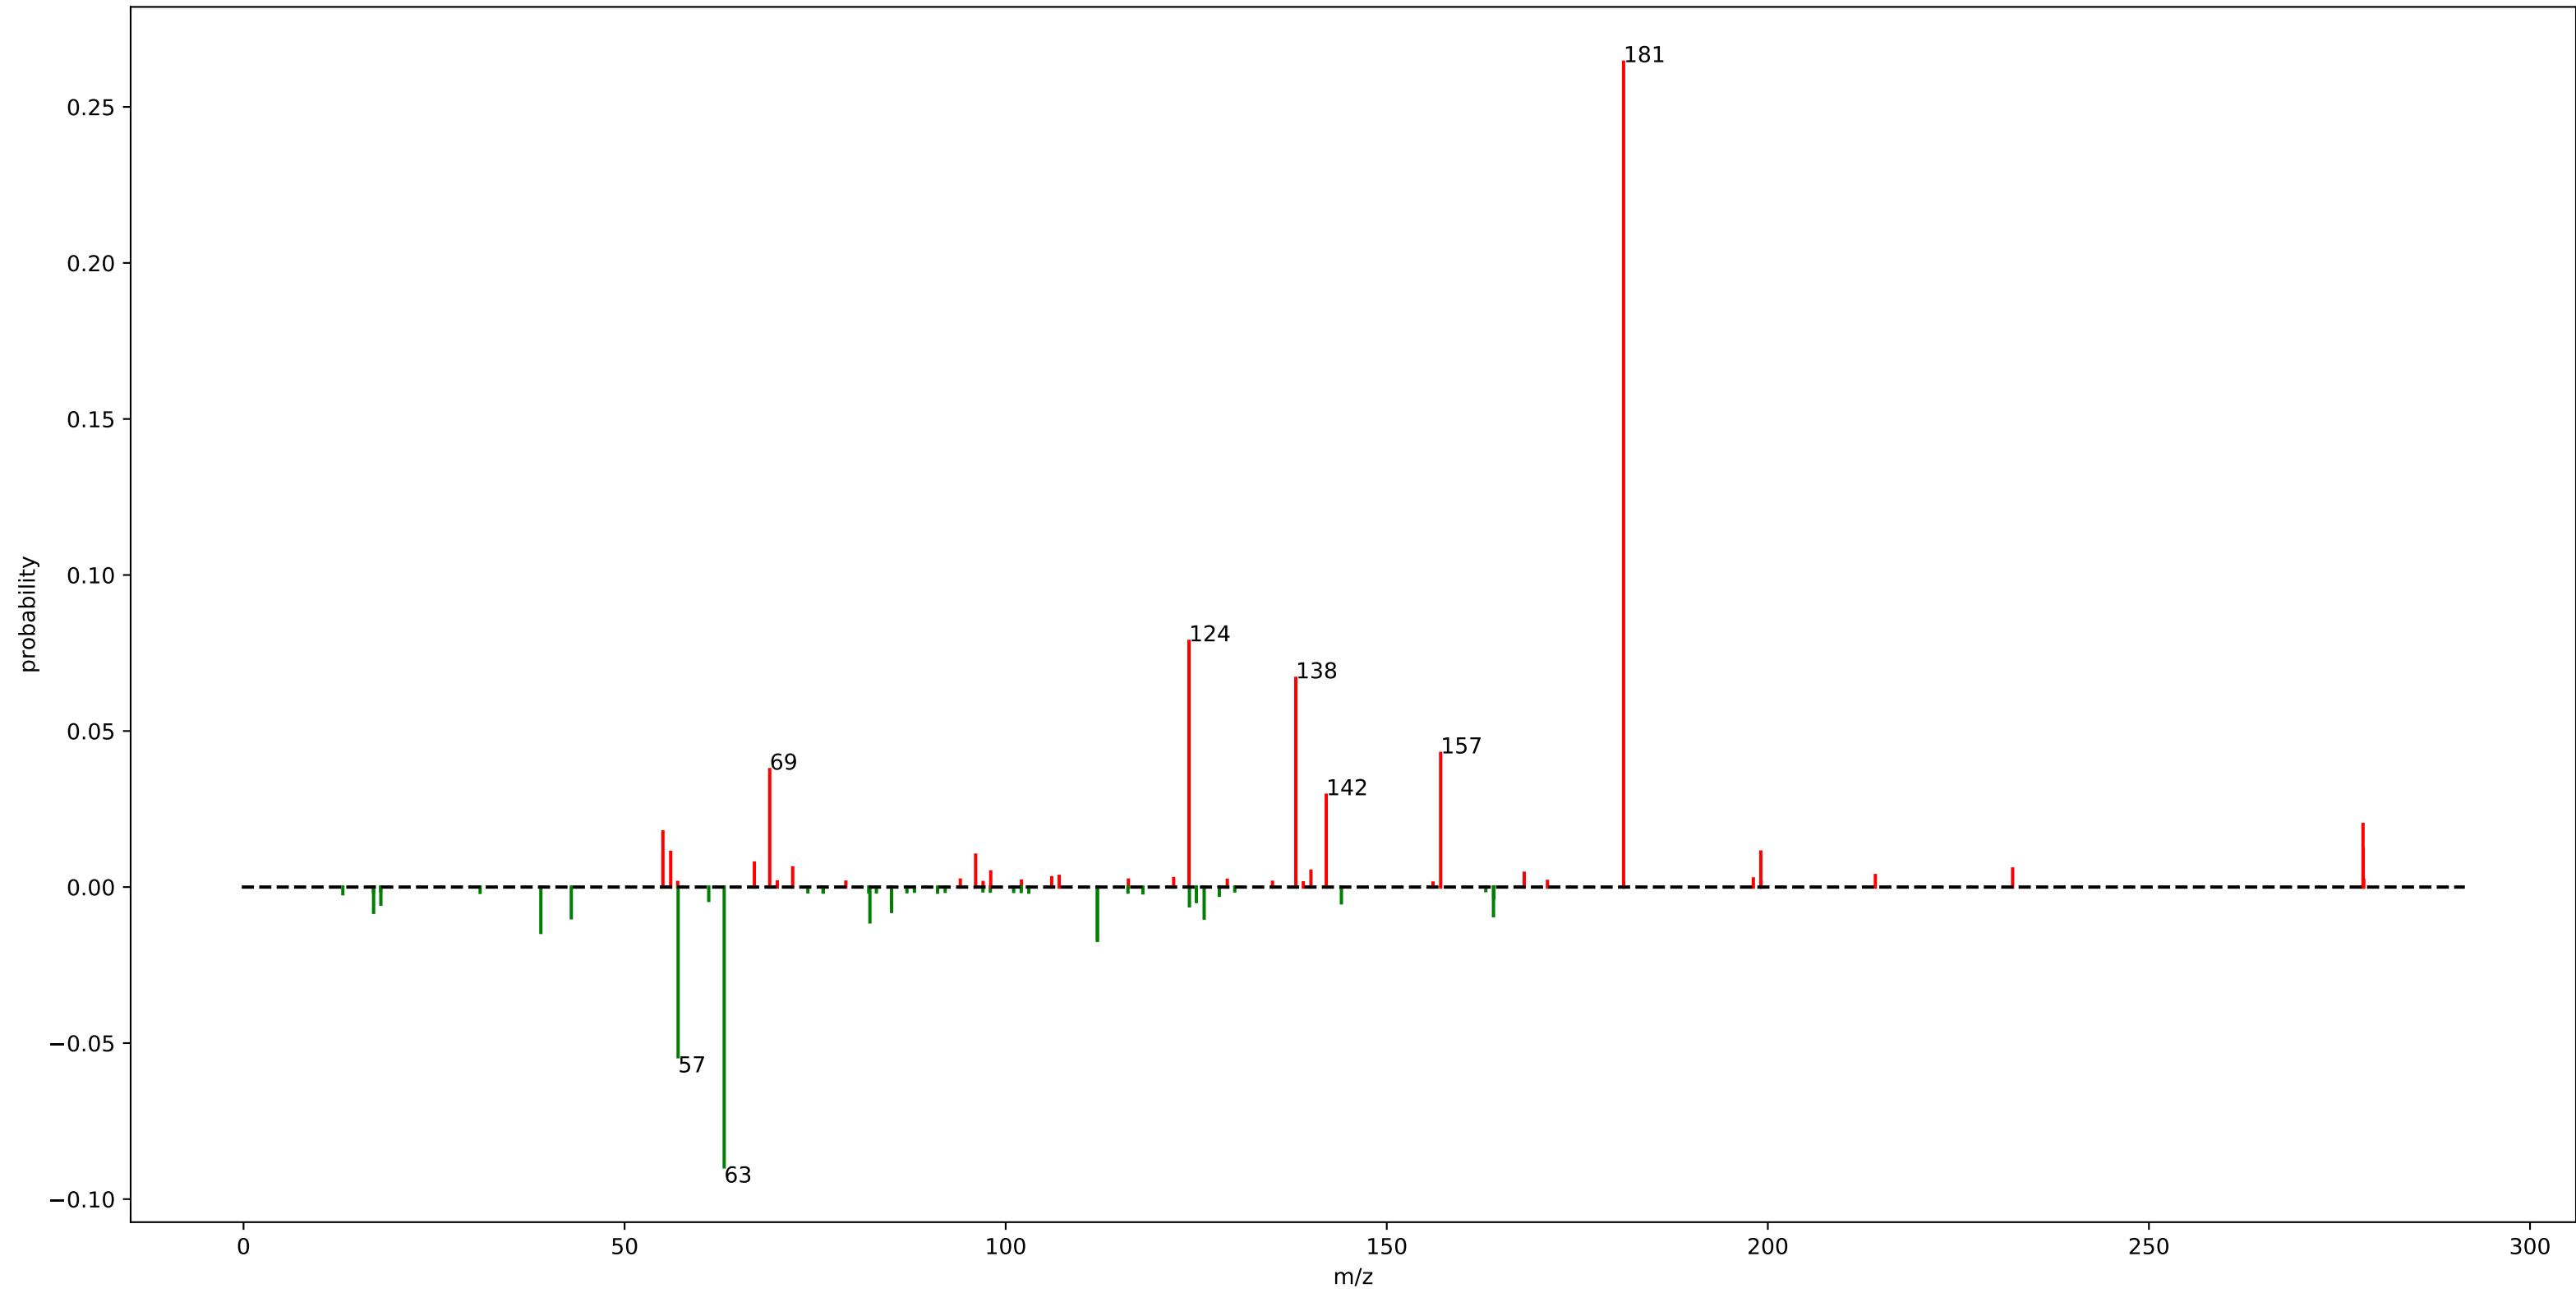

# urine\_mass2motif\_246.m2m

|                   |        |                   |        |
|-------------------|--------|-------------------|--------|
| fragment_181.0725 | : 0.26 | loss_164.0025     | : 0.01 |
| loss_63.0675      | : 0.09 | loss_17.0675      | : 0.01 |
| fragment_124.0525 | : 0.08 | loss_85.0275      | : 0.01 |
| fragment_138.0675 | : 0.07 | fragment_67.0275  | : 0.01 |
| loss_57.0225      | : 0.05 | fragment_72.0575  | : 0.01 |
| fragment_157.0725 | : 0.04 | loss_124.1075     | : 0.01 |
| fragment_69.0425  | : 0.04 | fragment_232.1175 | : 0.01 |
| fragment_142.0625 | : 0.03 | loss_85.0175      | : 0.01 |
| fragment_278.0925 | : 0.02 | loss_18.0225      | : 0.01 |
| fragment_55.0275  | : 0.02 | fragment_140.0525 | : 0.01 |
| loss_112.0375     | : 0.02 | loss_144.0475     | : 0.01 |
| loss_112.0275     | : 0.02 |                   |        |
| loss_39.0125      | : 0.01 |                   |        |
| fragment_278.1225 | : 0.01 |                   |        |
| fragment_199.0775 | : 0.01 |                   |        |
| loss_82.1875      | : 0.01 |                   |        |
| fragment_56.0475  | : 0.01 |                   |        |
| fragment_96.0575  | : 0.01 |                   |        |
| loss_126.0425     | : 0.01 |                   |        |
| loss_43.0075      | : 0.01 |                   |        |

urine\_mass2motif\_117.m2m

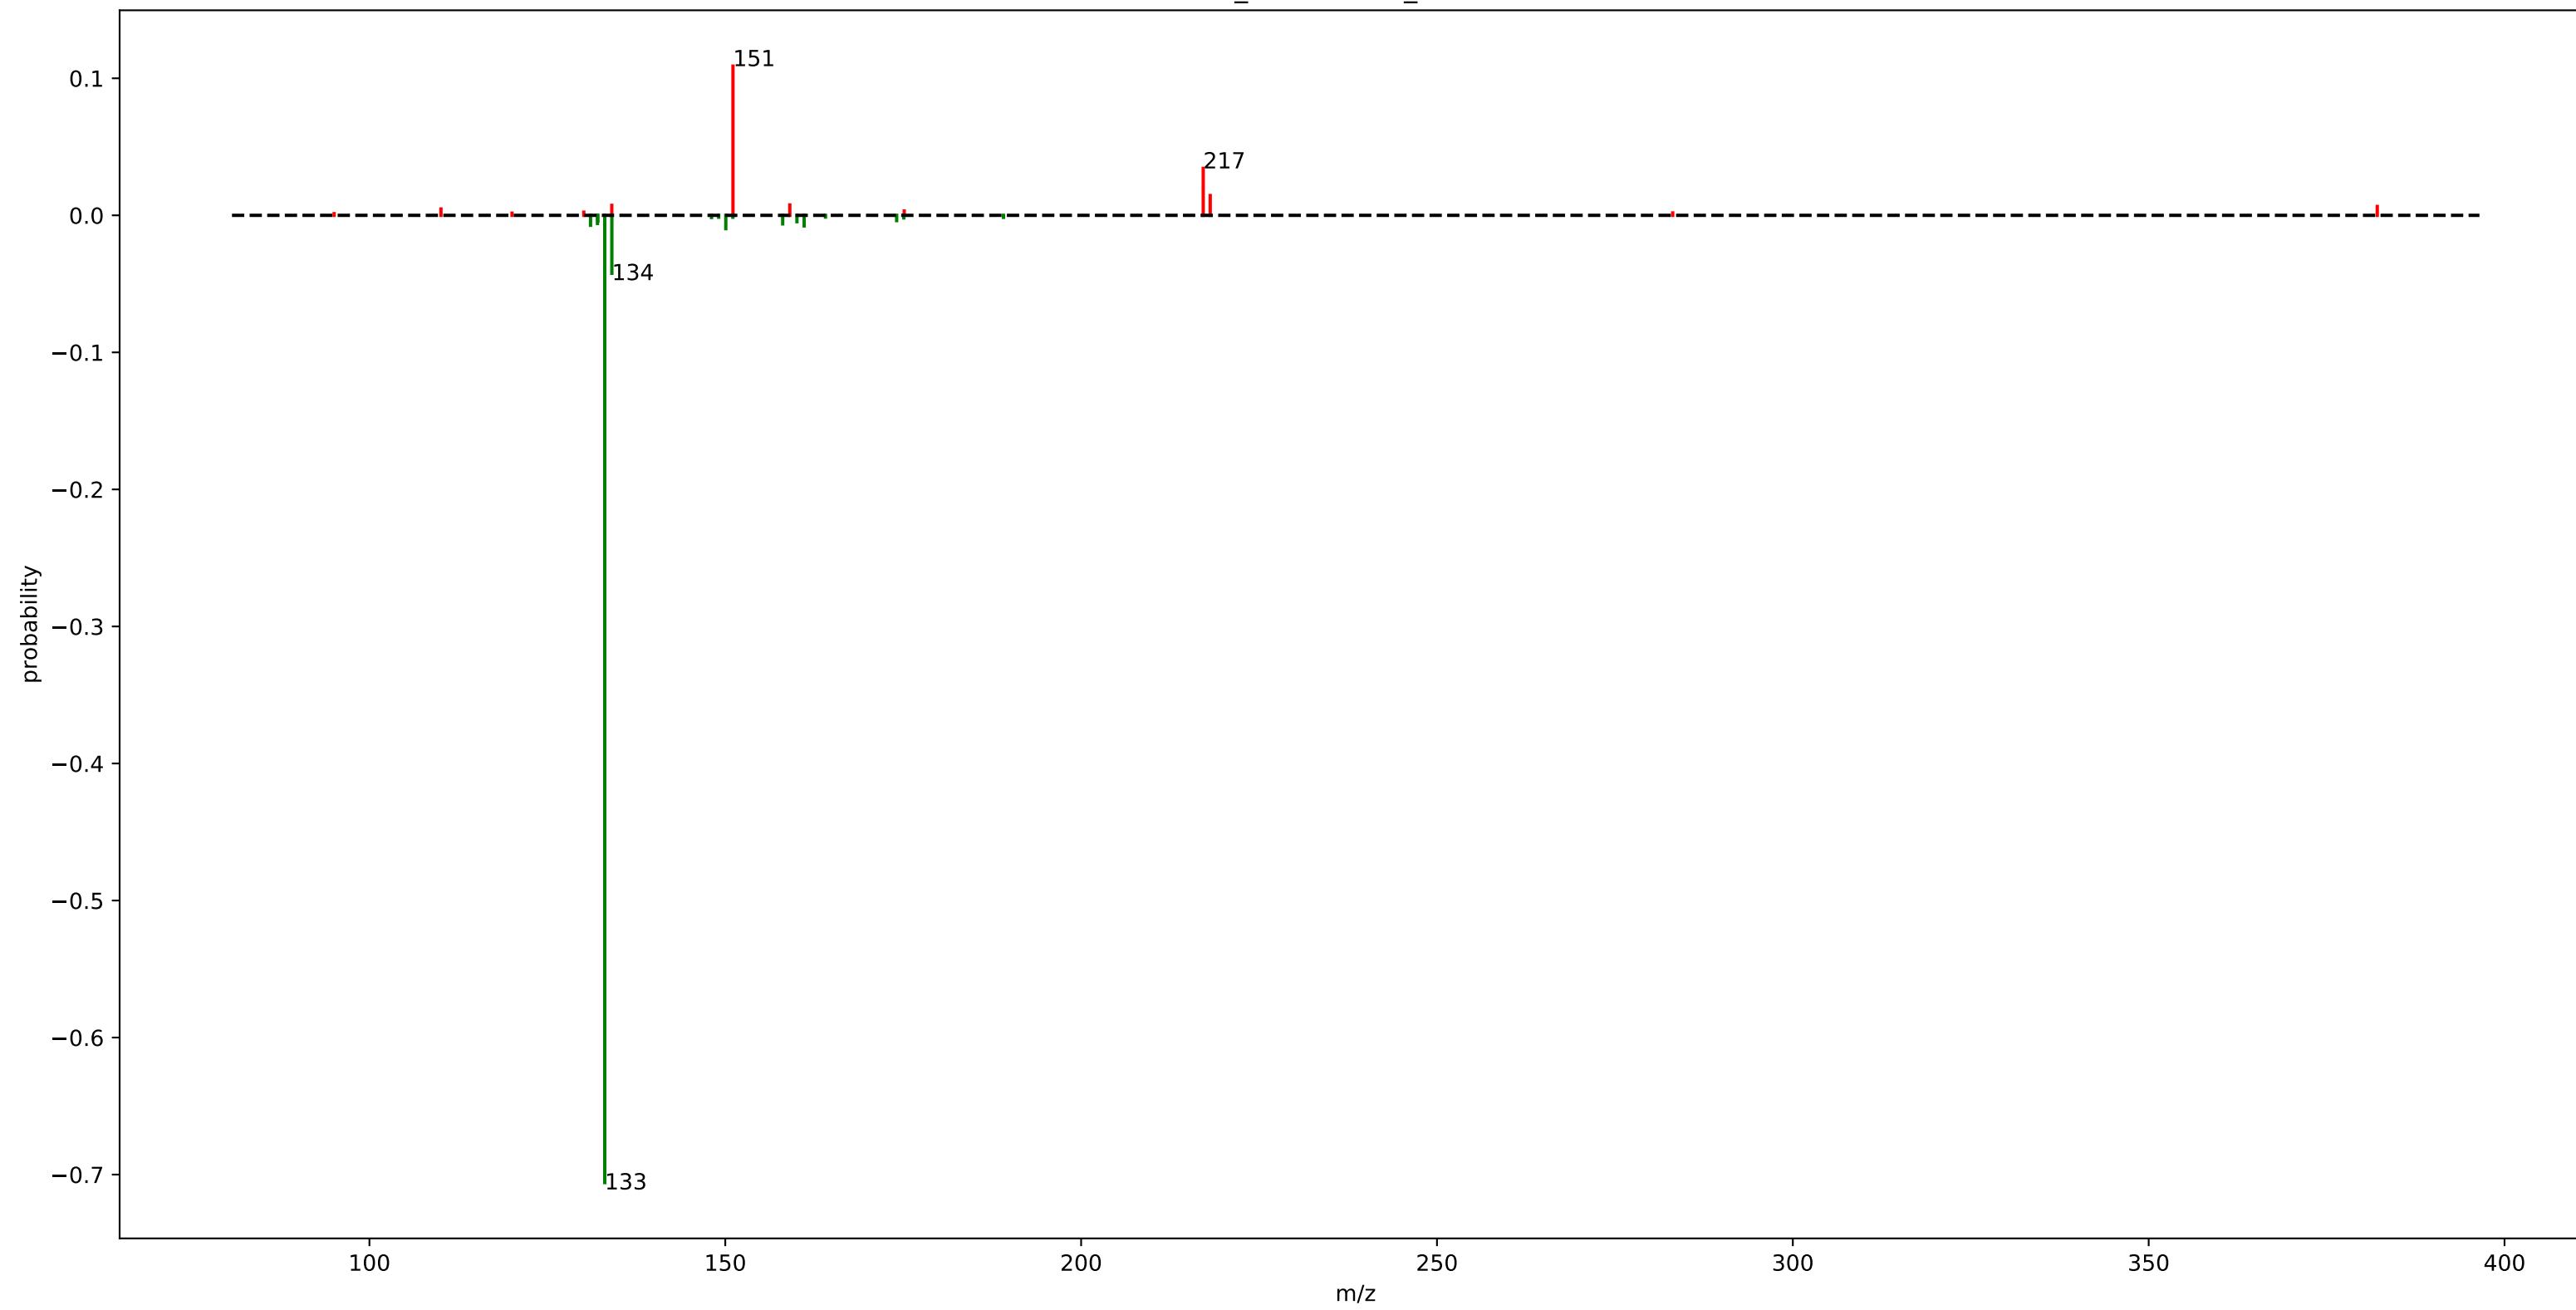

## urine\_mass2motif\_117.m2m

|                   |        |
|-------------------|--------|
| loss_133.0675     | : 0.71 |
| fragment_151.0825 | : 0.11 |
| loss_134.0625     | : 0.04 |
| fragment_217.1575 | : 0.03 |
| fragment_218.1375 | : 0.01 |
| loss_150.0725     | : 0.01 |
| loss_161.0825     | : 0.01 |
| fragment_159.0675 | : 0.01 |
| fragment_134.0525 | : 0.01 |
| loss_131.0675     | : 0.01 |
| fragment_382.1175 | : 0.01 |
| loss_158.0675     | : 0.01 |
| loss_132.0425     | : 0.01 |

rhamn\_motif\_163.m2m

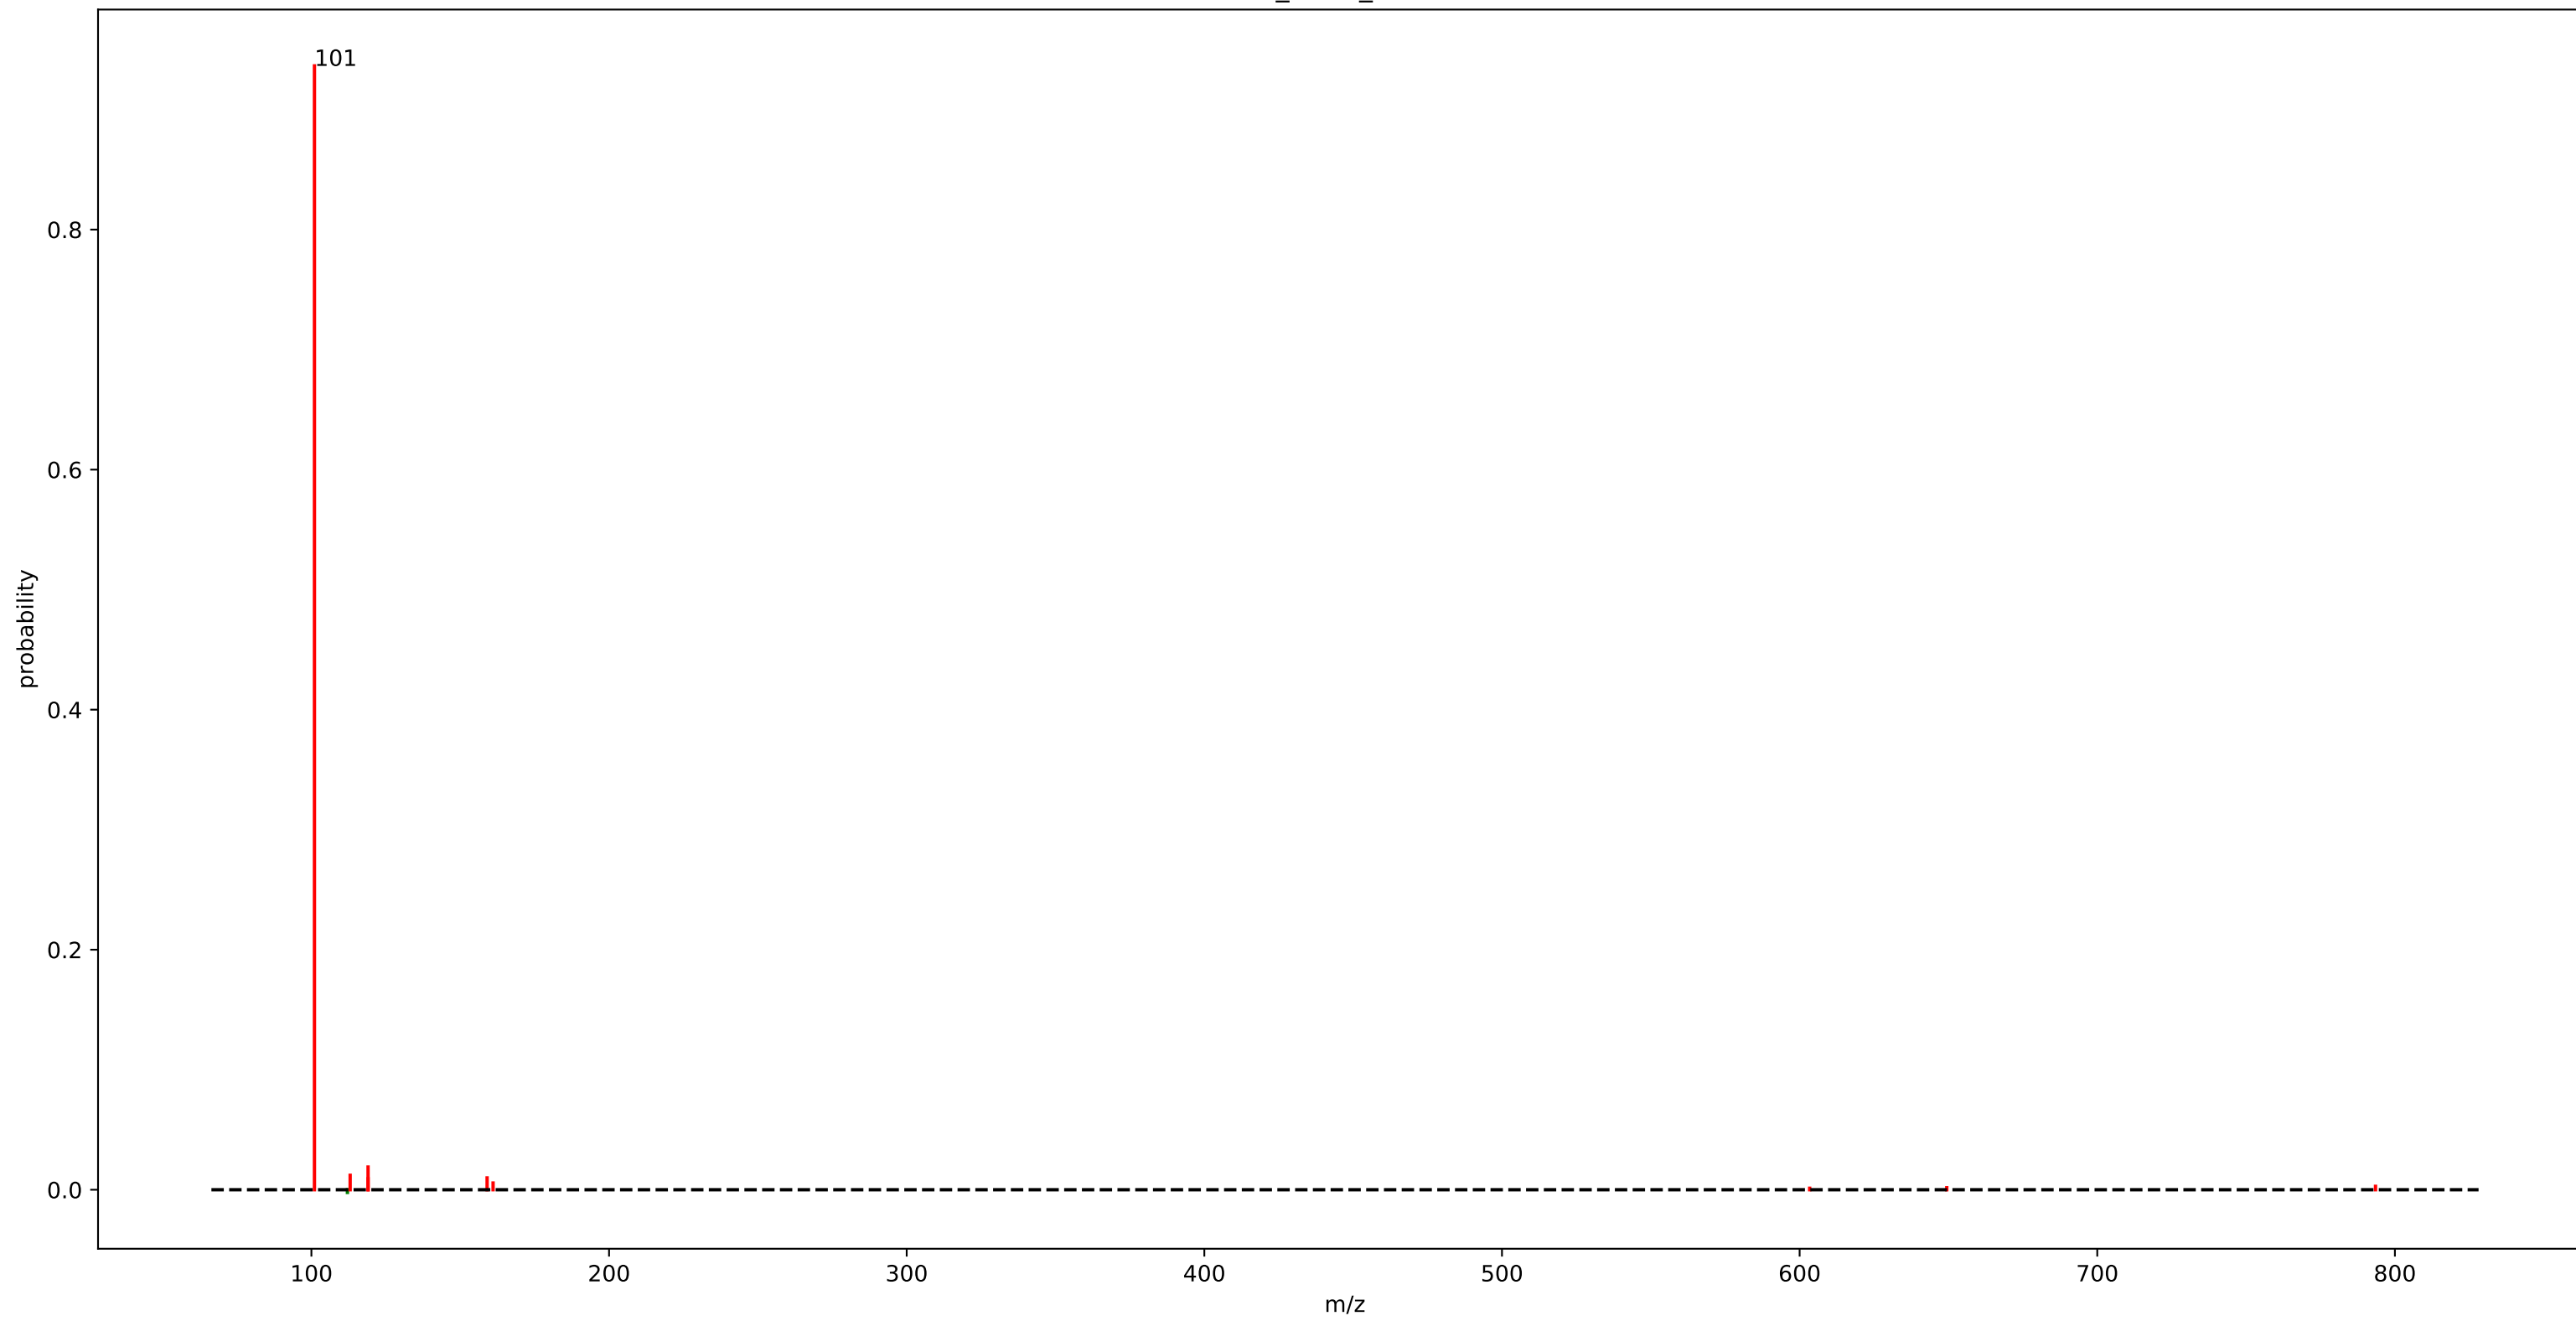

## rhamn\_motif\_163.m2m

|                   |        |
|-------------------|--------|
| fragment_101.0225 | : 0.94 |
| fragment_119.0325 | : 0.02 |
| fragment_113.0175 | : 0.01 |
| fragment_159.0275 | : 0.01 |
| fragment_119.0375 | : 0.01 |
| fragment_161.0375 | : 0.01 |



euphorbia\_motif\_93.m2m

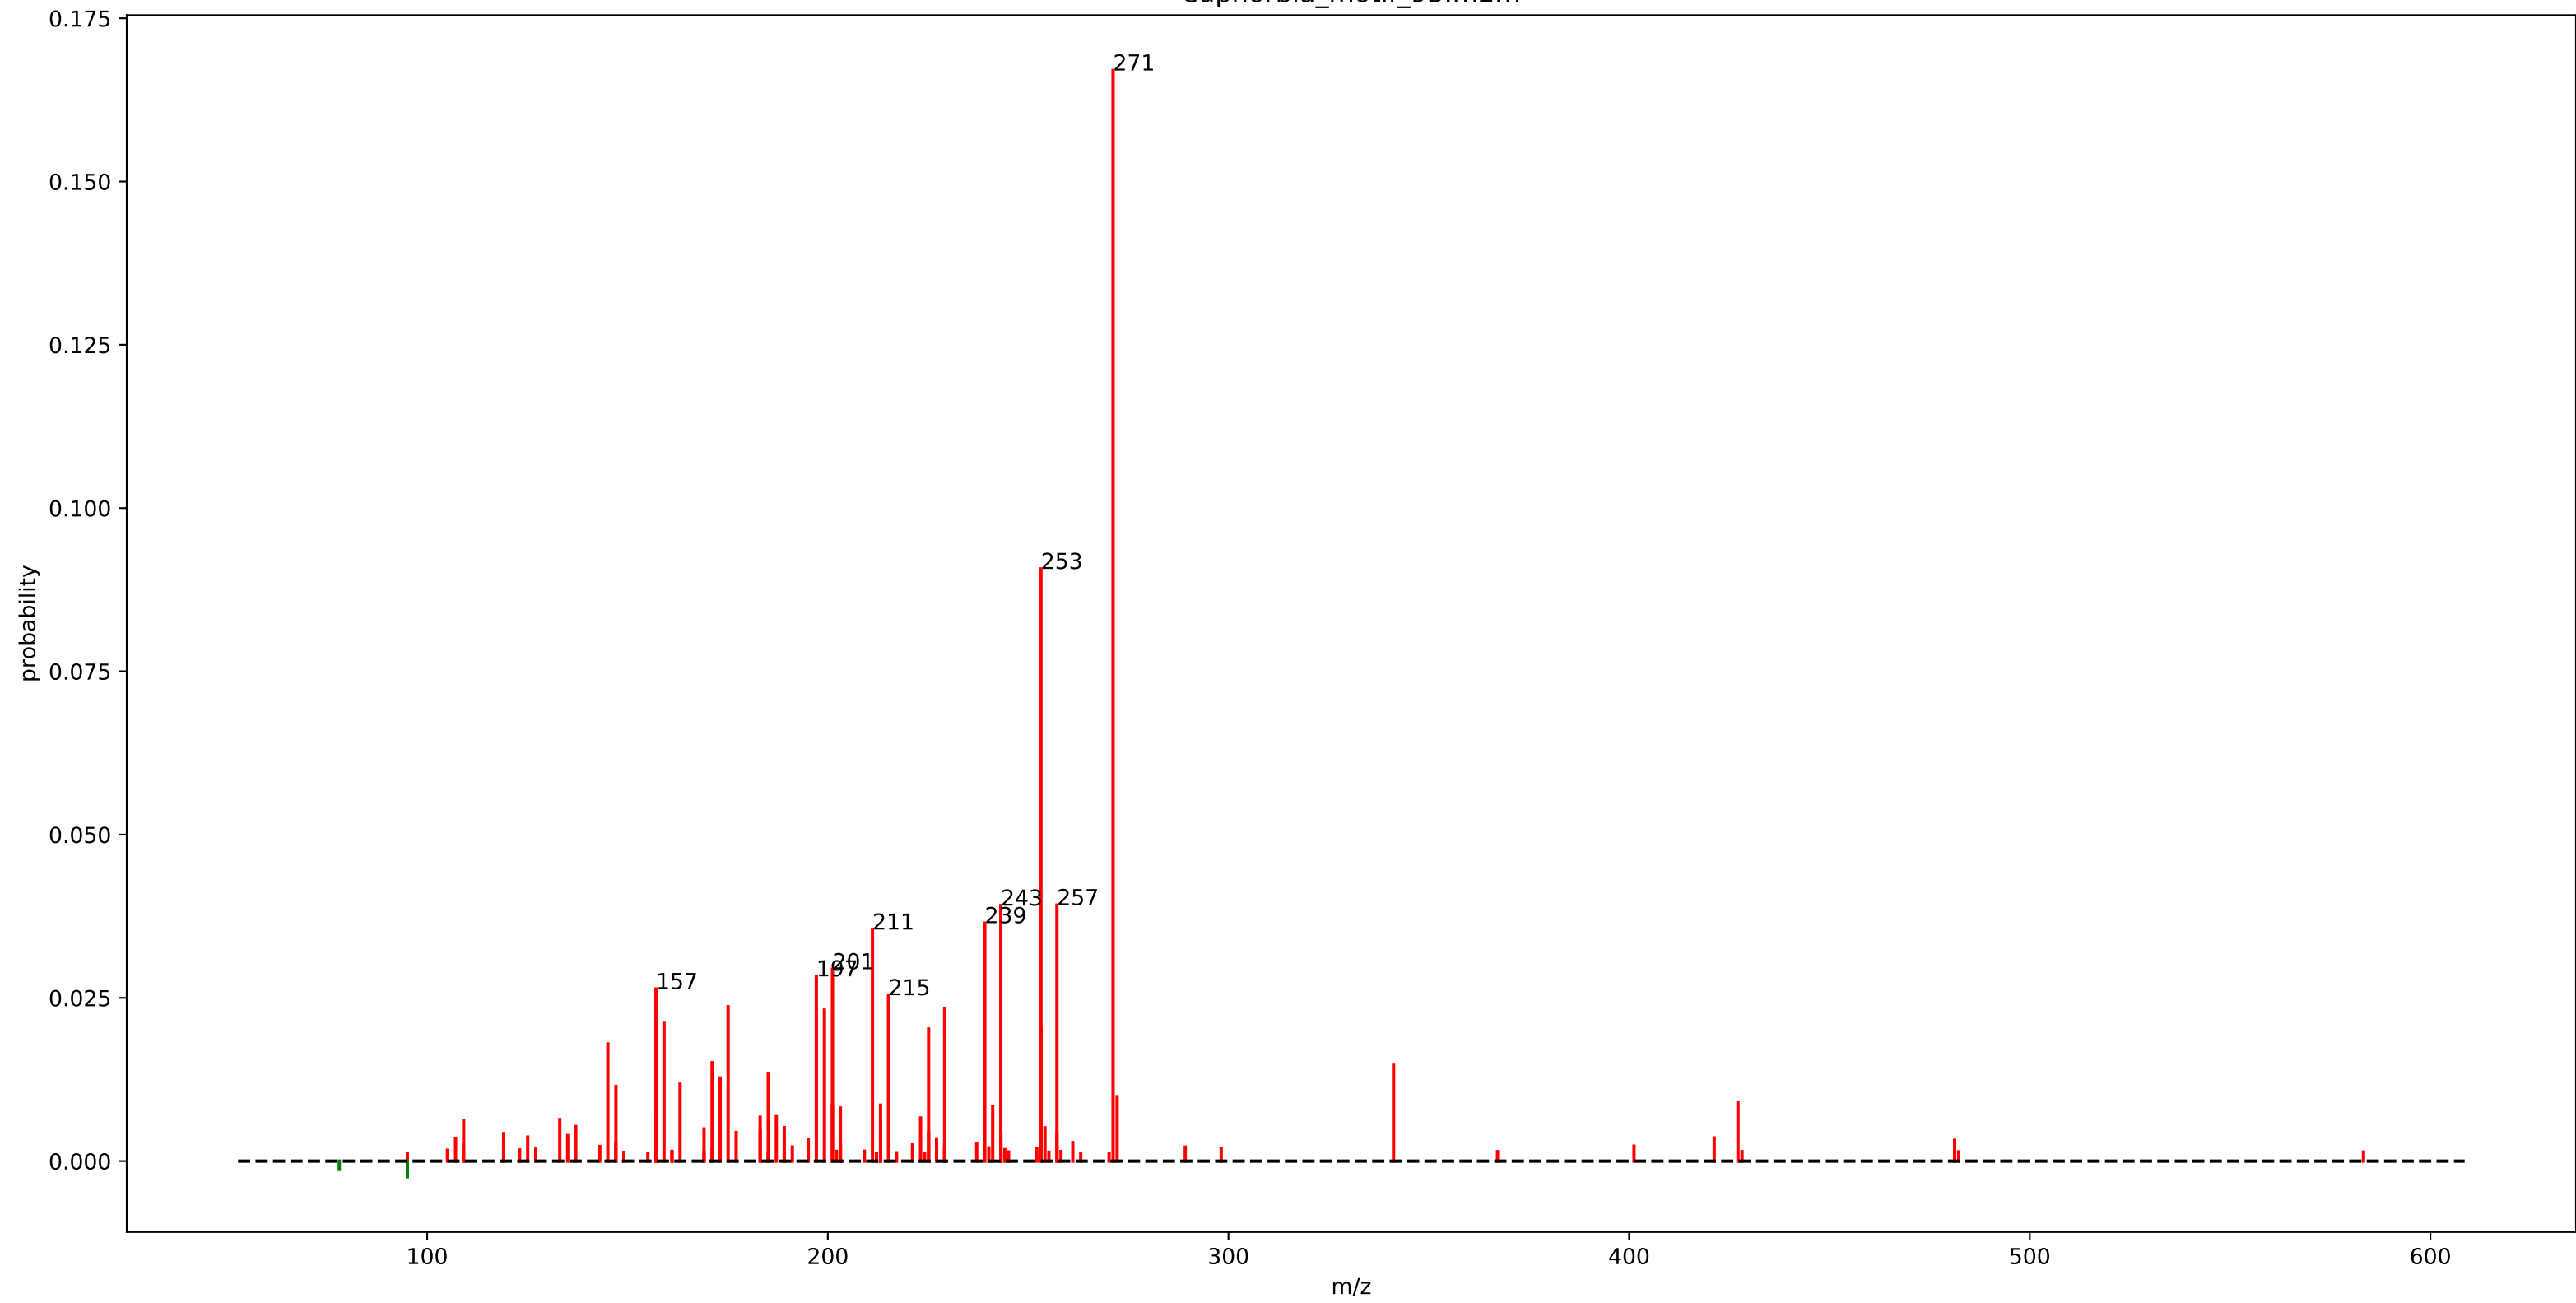

# euphorbia\_motif\_93.m2m

|                   |        |                   |        |
|-------------------|--------|-------------------|--------|
| fragment_271.2025 | : 0.17 | fragment_173.1325 | : 0.01 |
| fragment_253.1925 | : 0.09 | fragment_163.1125 | : 0.01 |
| fragment_257.1875 | : 0.04 | fragment_147.1175 | : 0.01 |
| fragment_243.1725 | : 0.04 | fragment_272.2075 | : 0.01 |
| fragment_239.1775 | : 0.04 | fragment_427.1725 | : 0.01 |
| fragment_211.1475 | : 0.04 | fragment_201.1275 | : 0.01 |
| fragment_201.1625 | : 0.03 | fragment_213.1625 | : 0.01 |
| fragment_197.1325 | : 0.03 | fragment_241.1575 | : 0.01 |
| fragment_157.1025 | : 0.03 | fragment_203.1425 | : 0.01 |
| fragment_215.1425 | : 0.03 | fragment_157.0975 | : 0.01 |
| fragment_175.1125 | : 0.02 | fragment_187.1475 | : 0.01 |
| fragment_229.1575 | : 0.02 | fragment_183.1125 | : 0.01 |
| fragment_199.1475 | : 0.02 | fragment_223.1475 | : 0.01 |
| fragment_159.1175 | : 0.02 | fragment_133.1025 | : 0.01 |
| fragment_225.1625 | : 0.02 | fragment_109.1025 | : 0.01 |
| fragment_253.1975 | : 0.02 | fragment_213.1675 | : 0.01 |
| fragment_145.0975 | : 0.02 | fragment_137.0925 | : 0.01 |
| fragment_171.1175 | : 0.02 | fragment_189.1275 | : 0.01 |
| fragment_341.2075 | : 0.01 | fragment_254.1975 | : 0.01 |
| fragment_185.1325 | : 0.01 |                   |        |

gnps\_motif\_50.m2m

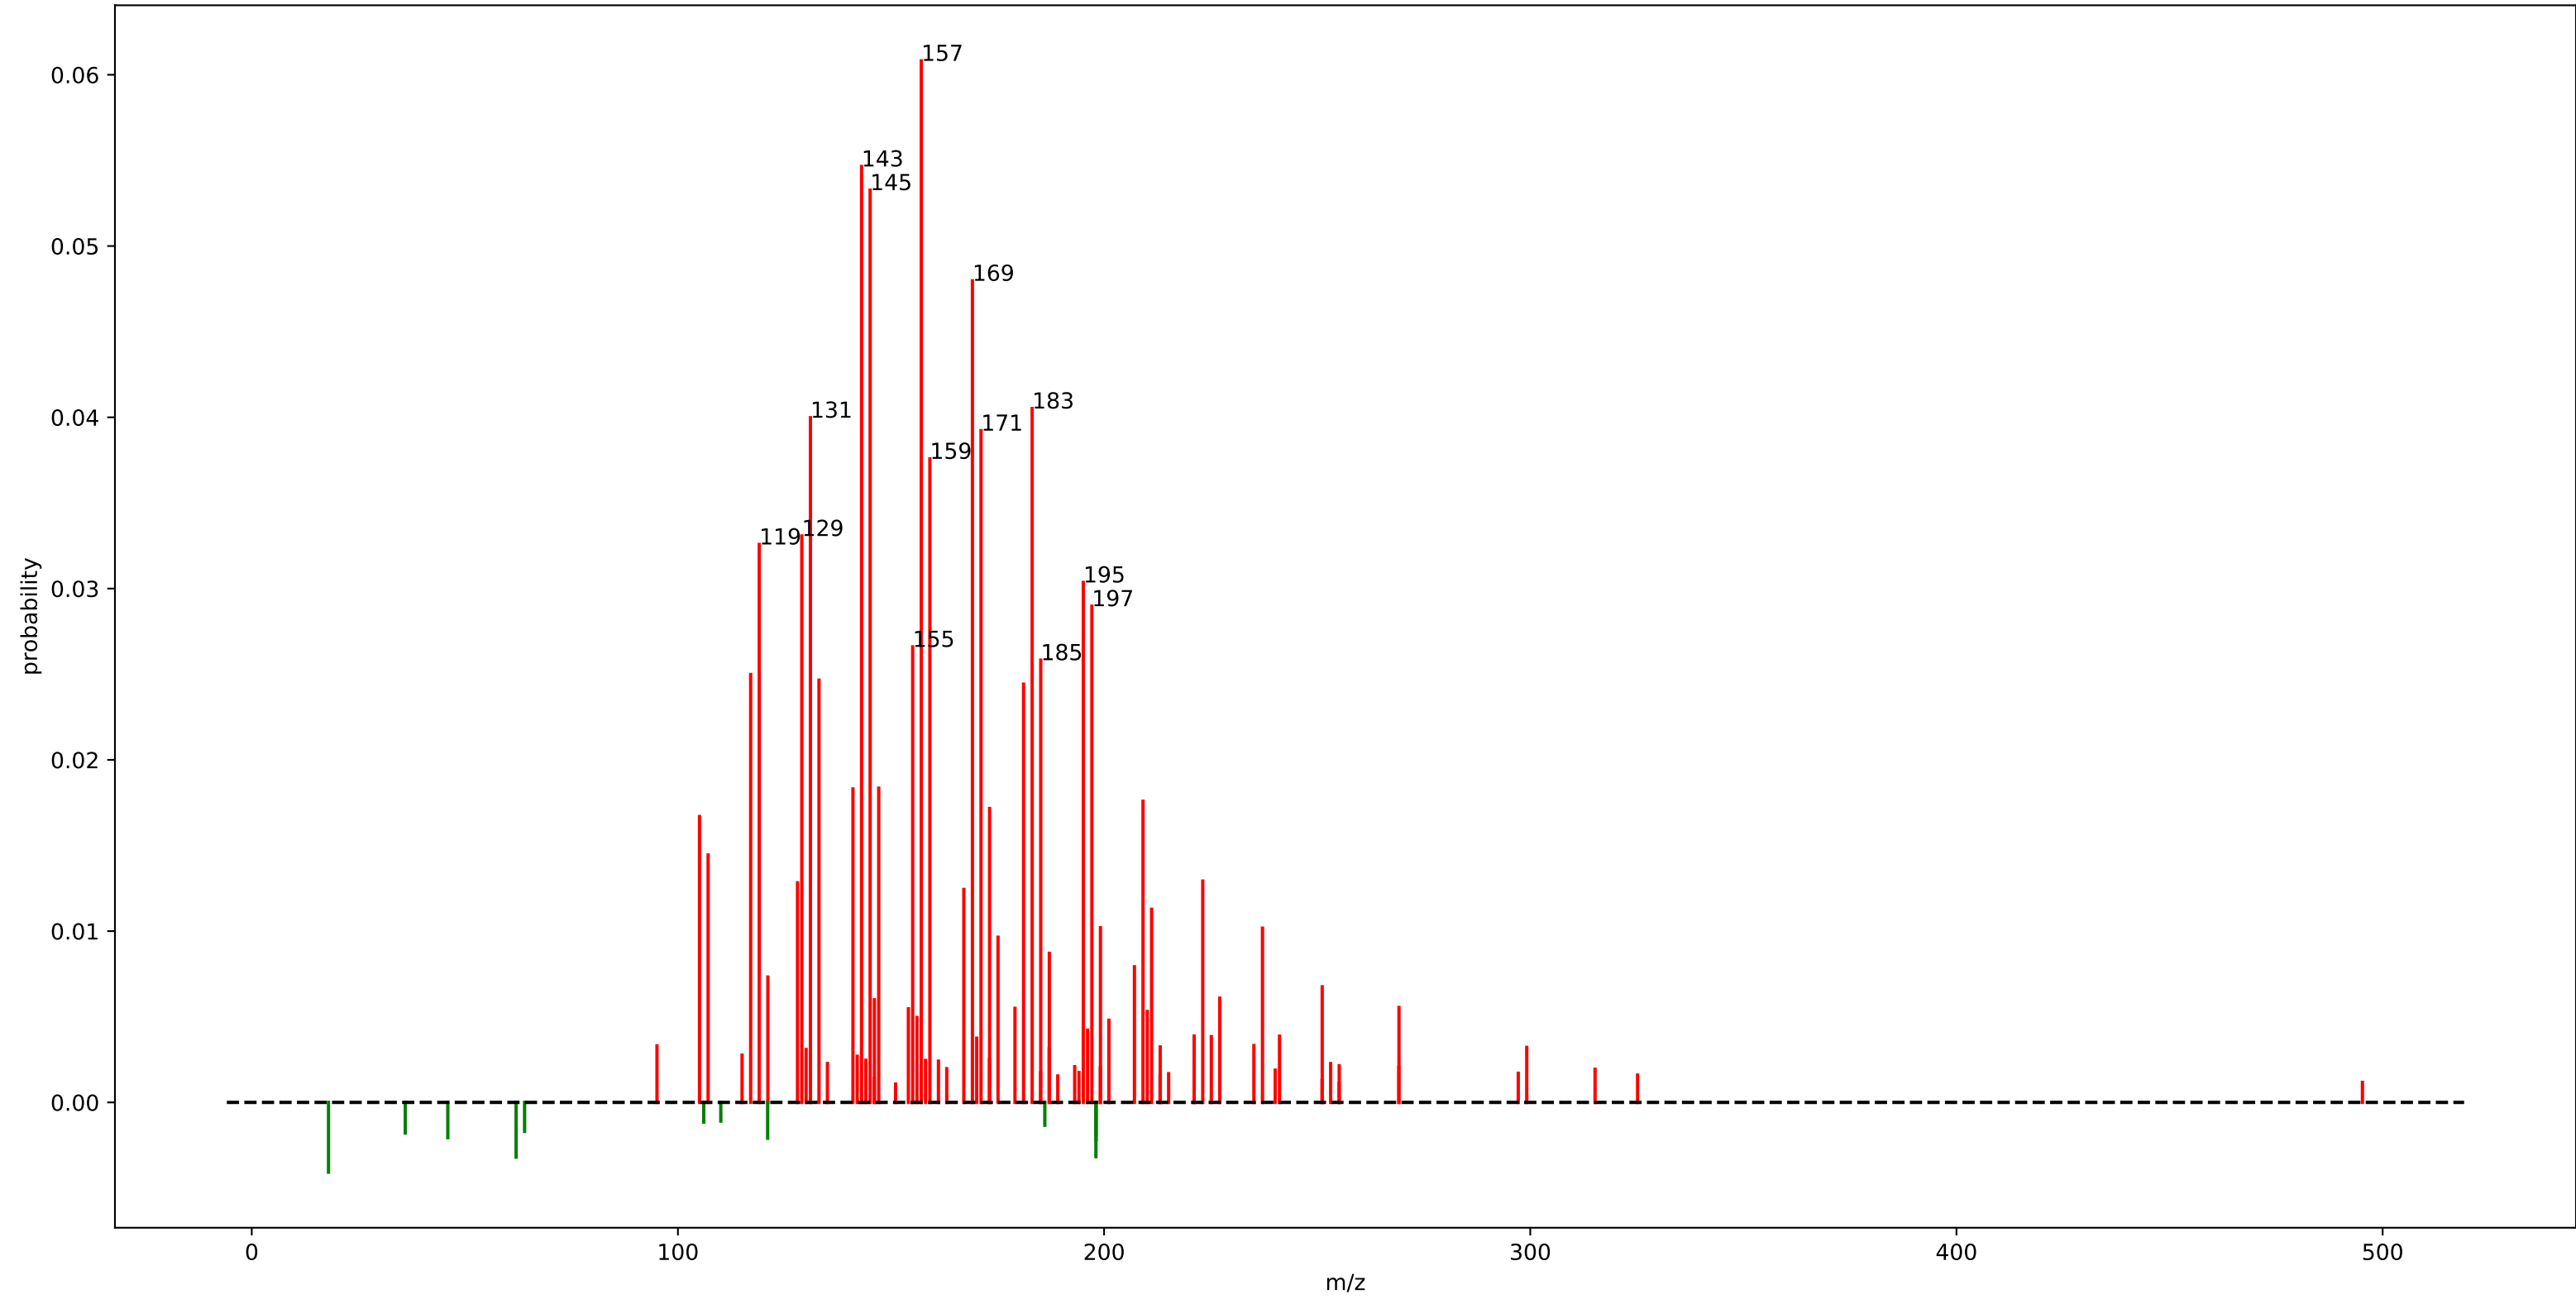

## gnps\_motif\_50.m2m

|                   |        |                   |        |
|-------------------|--------|-------------------|--------|
| fragment_157.1025 | : 0.06 | fragment_173.1325 | : 0.02 |
| fragment_143.0875 | : 0.05 | fragment_105.0675 | : 0.02 |
| fragment_145.1025 | : 0.05 | fragment_107.0875 | : 0.01 |
| fragment_169.1025 | : 0.05 | fragment_223.1475 | : 0.01 |
| fragment_183.1175 | : 0.04 | fragment_128.0625 | : 0.01 |
| fragment_131.0875 | : 0.04 | fragment_167.0875 | : 0.01 |
| fragment_171.1175 | : 0.04 | fragment_211.1475 | : 0.01 |
| fragment_159.1175 | : 0.04 | fragment_199.1475 | : 0.01 |
| fragment_129.0675 | : 0.03 | fragment_237.1625 | : 0.01 |
| fragment_119.0875 | : 0.03 | fragment_175.1125 | : 0.01 |
| fragment_195.1175 | : 0.03 | fragment_187.1475 | : 0.01 |
| fragment_197.1325 | : 0.03 | fragment_207.1175 | : 0.01 |
| fragment_155.0875 | : 0.03 | fragment_121.1025 | : 0.01 |
| fragment_185.1325 | : 0.03 | fragment_251.1775 | : 0.01 |
| fragment_117.0675 | : 0.02 | fragment_227.1425 | : 0.01 |
| fragment_133.1025 | : 0.02 | fragment_146.1025 | : 0.01 |
| fragment_181.1025 | : 0.02 | fragment_269.1875 | : 0.01 |
| fragment_147.1175 | : 0.02 | fragment_179.0875 | : 0.01 |
| fragment_141.0675 | : 0.02 | fragment_154.0775 | : 0.01 |
| fragment_209.1325 | : 0.02 | fragment_210.1375 | : 0.01 |

urine\_mass2motif\_31.m2m

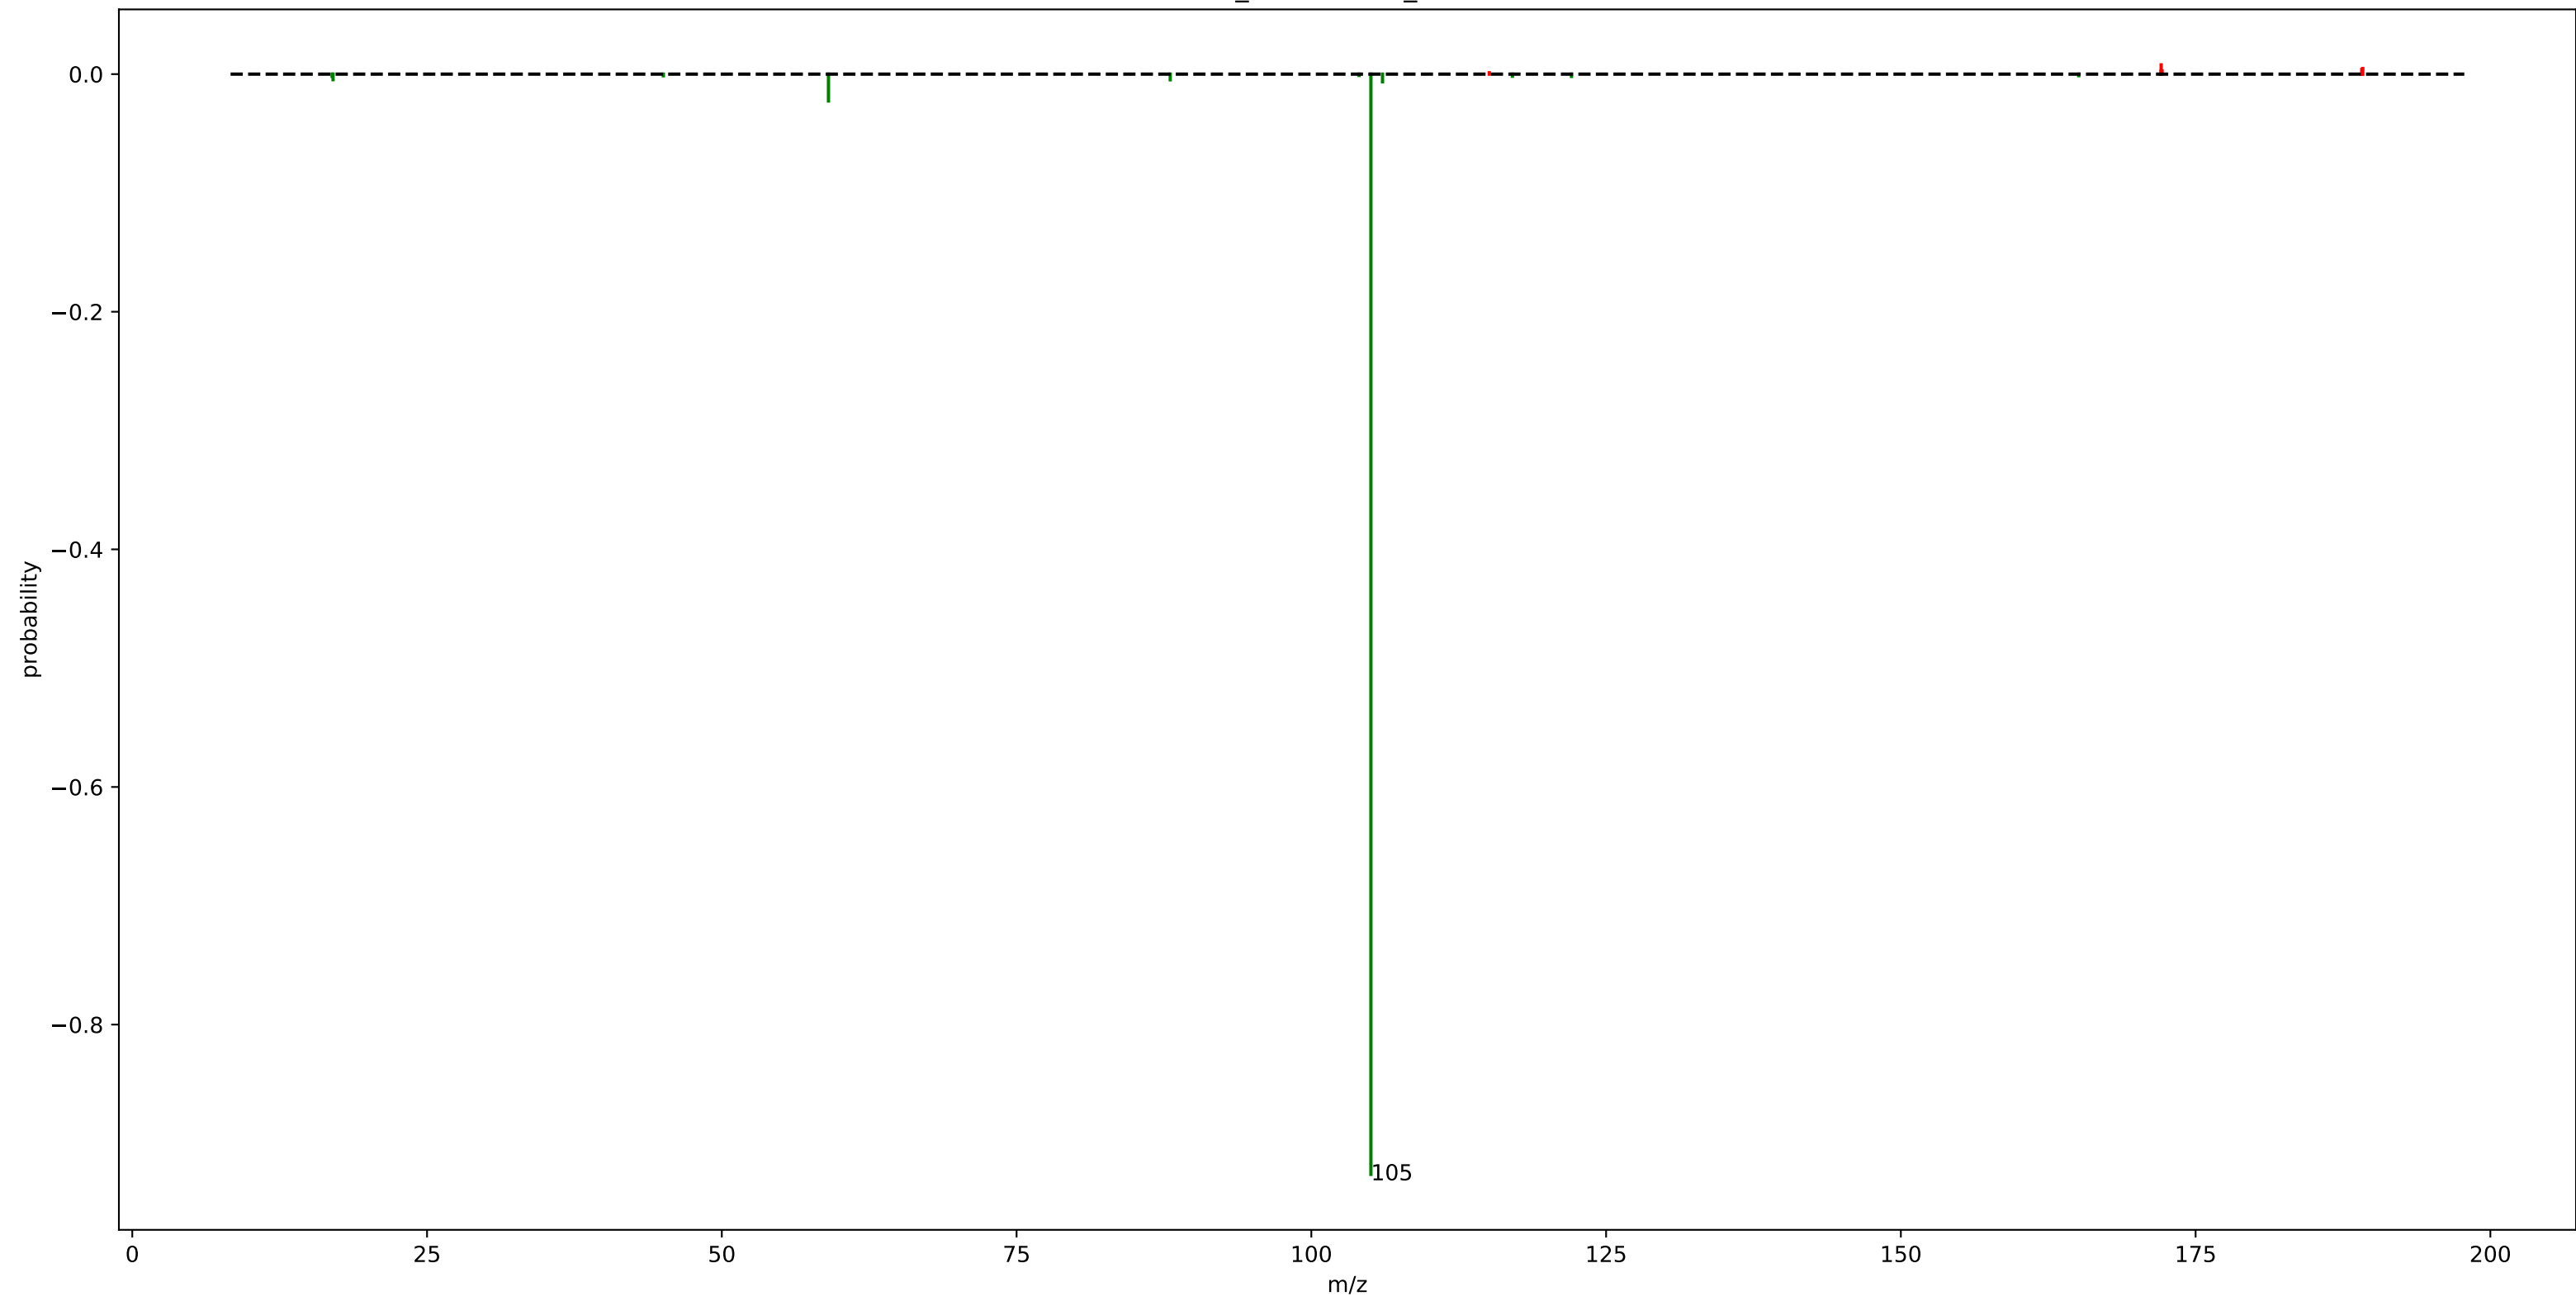

## urine\_mass2motif\_31.m2m

|                   |        |
|-------------------|--------|
| loss_105.0525     | : 0.93 |
| loss_59.0475      | : 0.02 |
| fragment_172.0775 | : 0.01 |
| loss_106.0375     | : 0.01 |

euphorbia\_motif\_173.m2m

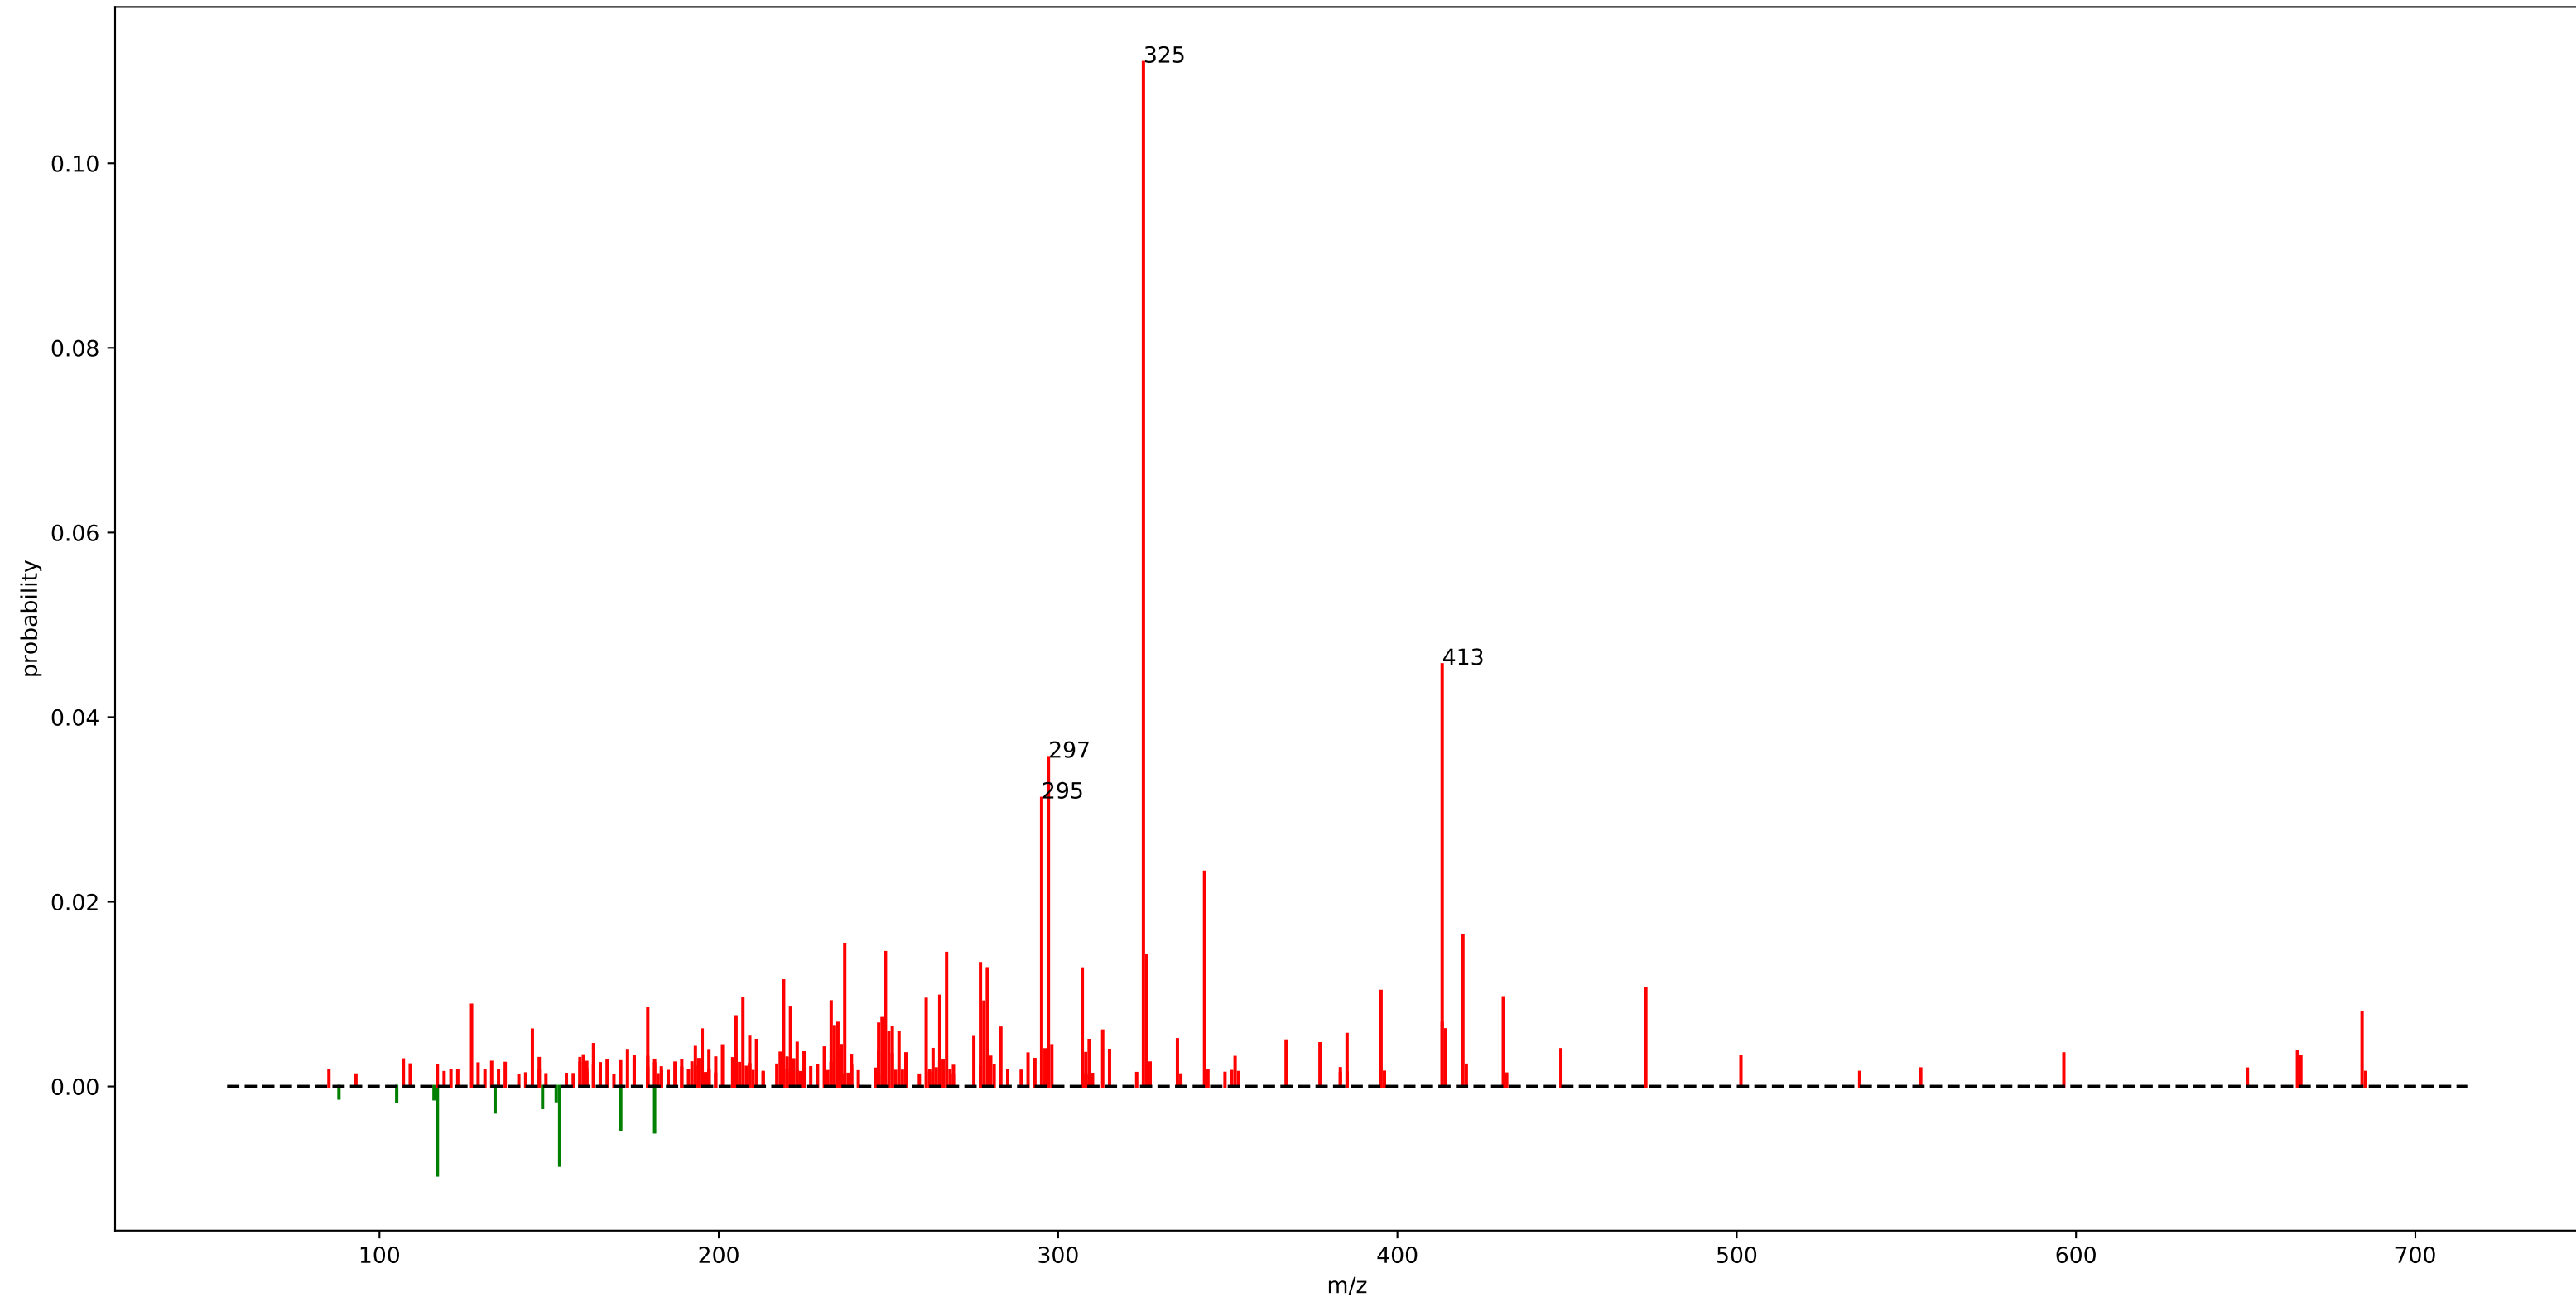

# euphorbia\_motif\_173.m2m

|                   |        |                   |        |                   |        |
|-------------------|--------|-------------------|--------|-------------------|--------|
| fragment_325.1425 | : 0.11 | fragment_261.1275 | : 0.01 | fragment_250.1325 | : 0.01 |
| fragment_413.1975 | : 0.05 | fragment_233.1325 | : 0.01 | fragment_253.1225 | : 0.01 |
| fragment_297.1475 | : 0.04 | fragment_278.1275 | : 0.01 | fragment_385.1625 | : 0.01 |
| fragment_295.1325 | : 0.03 | fragment_127.1475 | : 0.01 | fragment_209.1325 | : 0.01 |
| fragment_343.1525 | : 0.02 | fragment_221.1325 | : 0.01 | fragment_275.1625 | : 0.01 |
| fragment_419.3125 | : 0.02 | loss_153.0975     | : 0.01 | fragment_335.1625 | : 0.01 |
| fragment_237.1275 | : 0.02 | fragment_179.0725 | : 0.01 |                   |        |
| fragment_249.1275 | : 0.01 | fragment_684.2975 | : 0.01 |                   |        |
| fragment_267.1375 | : 0.01 | fragment_205.0875 | : 0.01 |                   |        |
| fragment_326.1475 | : 0.01 | fragment_248.1175 | : 0.01 |                   |        |
| fragment_277.1225 | : 0.01 | fragment_235.1125 | : 0.01 |                   |        |
| fragment_279.1375 | : 0.01 | fragment_413.1925 | : 0.01 |                   |        |
| fragment_307.1325 | : 0.01 | fragment_247.1125 | : 0.01 |                   |        |
| fragment_219.1175 | : 0.01 | fragment_234.1025 | : 0.01 |                   |        |
| fragment_473.2175 | : 0.01 | fragment_251.1425 | : 0.01 |                   |        |
| fragment_395.1875 | : 0.01 | fragment_283.1325 | : 0.01 |                   |        |
| fragment_265.1225 | : 0.01 | fragment_414.1975 | : 0.01 |                   |        |
| fragment_431.2075 | : 0.01 | fragment_195.1175 | : 0.01 |                   |        |
| loss_117.0775     | : 0.01 | fragment_145.0625 | : 0.01 |                   |        |
| fragment_207.1175 | : 0.01 | fragment_313.1425 | : 0.01 |                   |        |



motif\_471

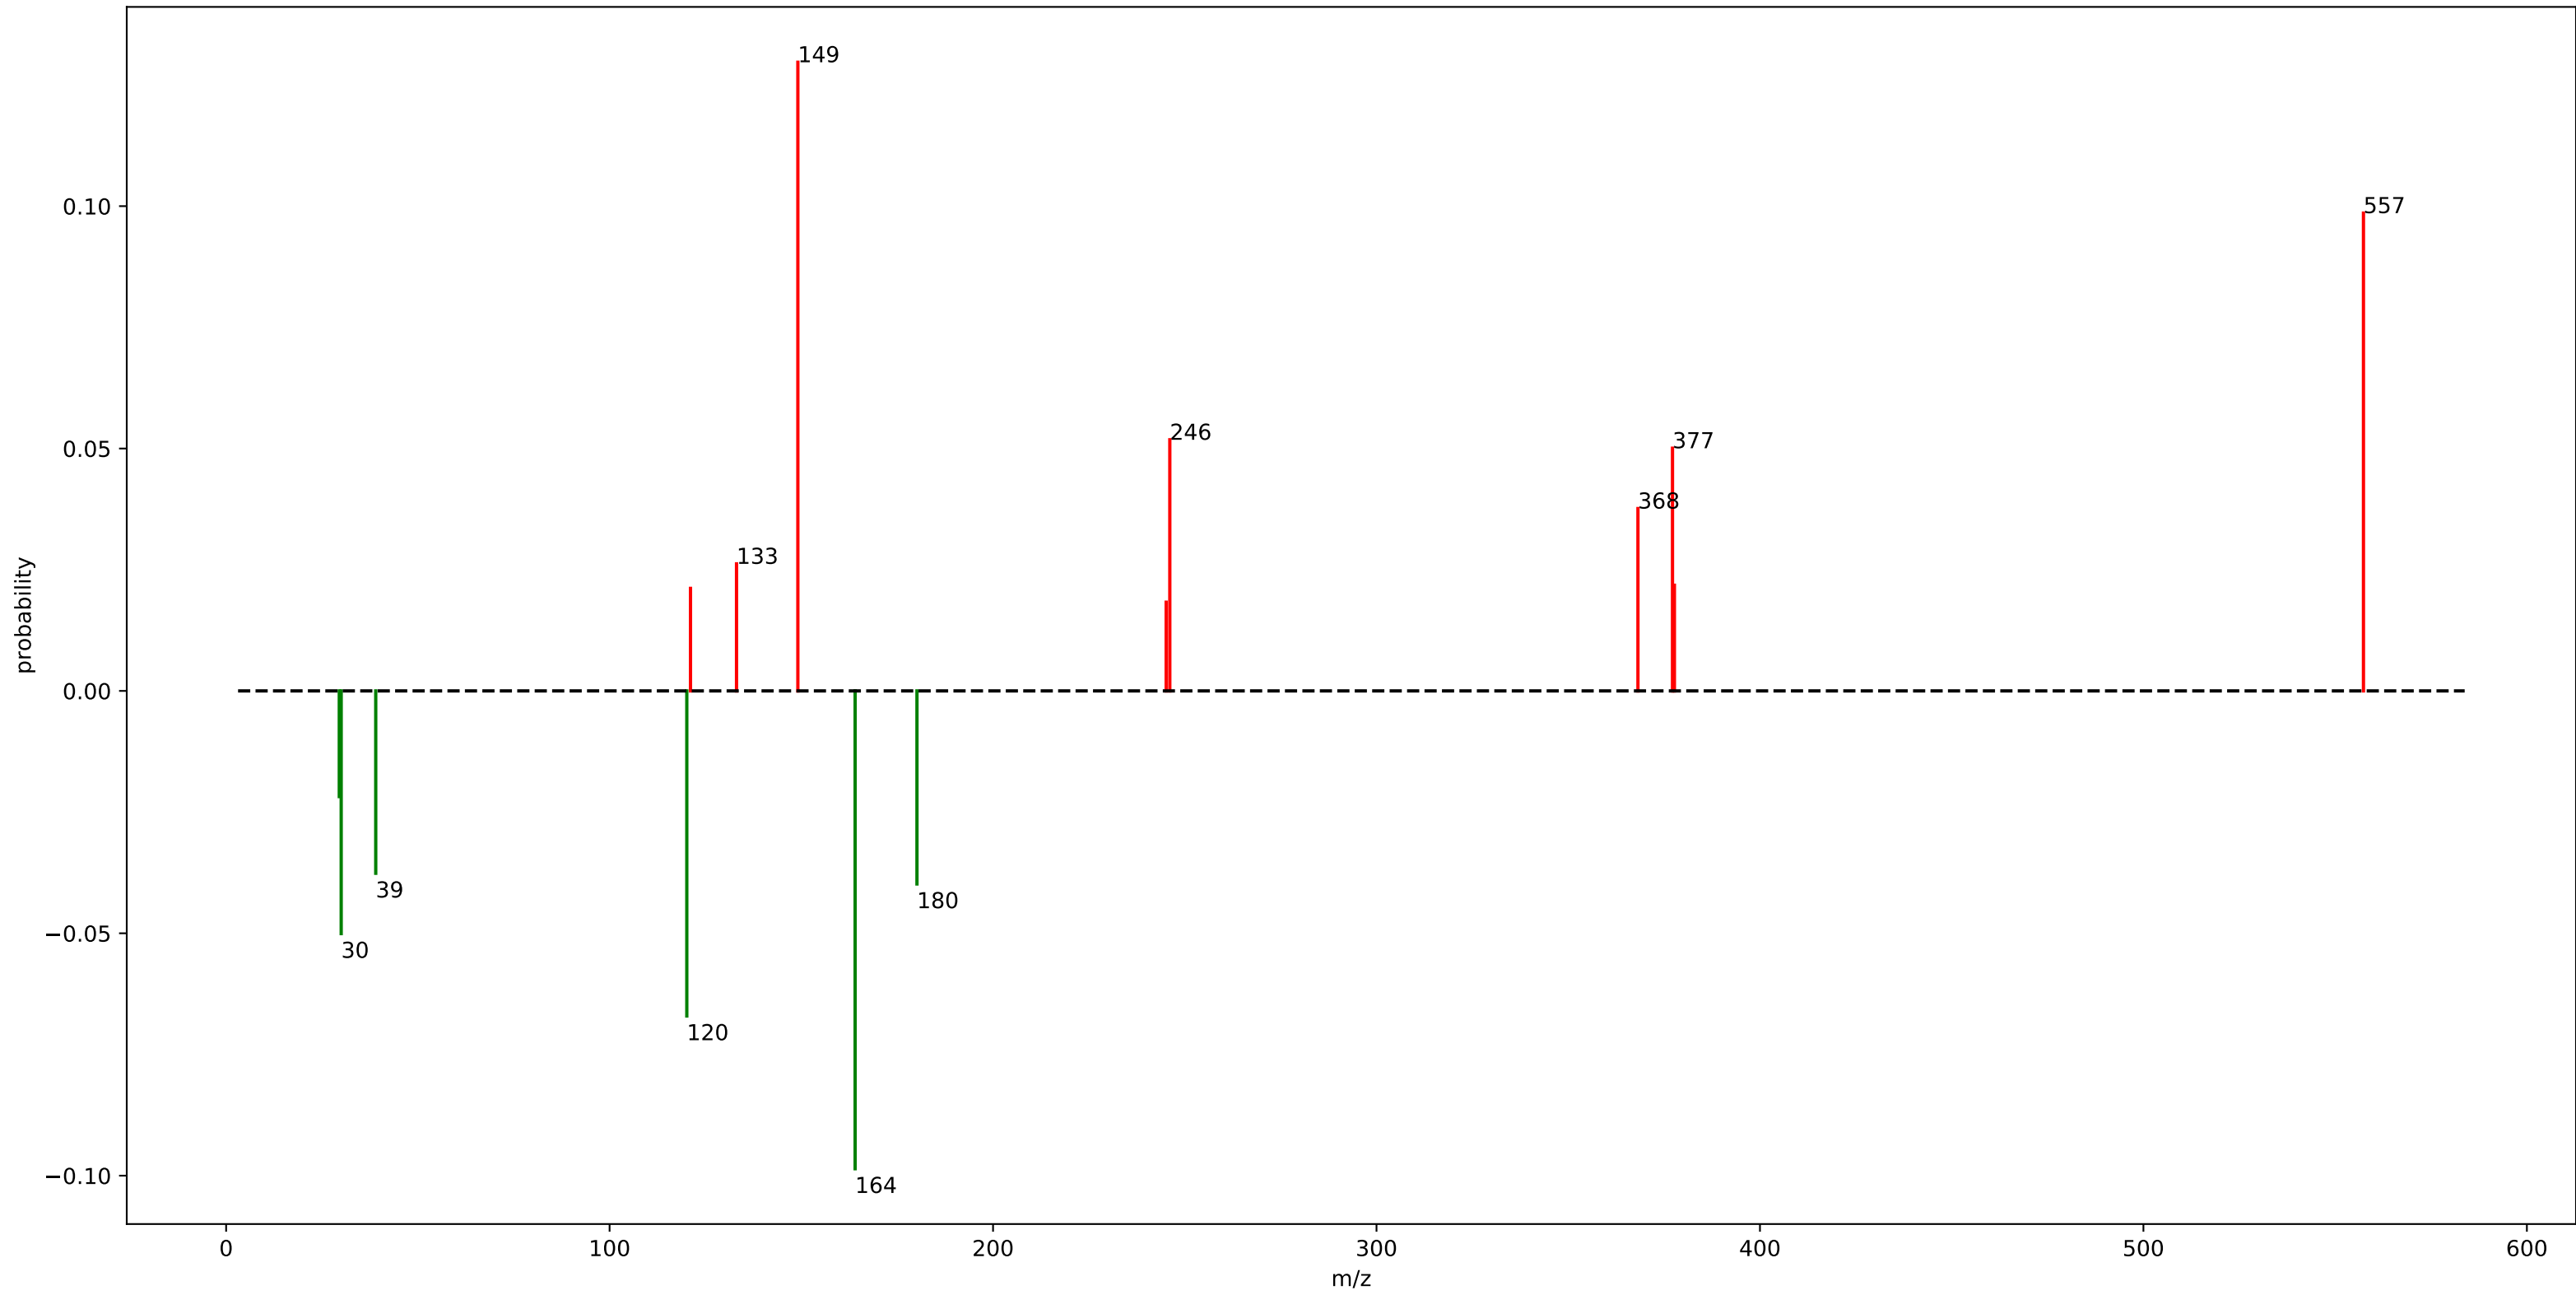

## motif\_471

|                   |        |
|-------------------|--------|
| fragment_149.0975 | : 0.13 |
| loss_164.0325     | : 0.10 |
| fragment_557.3825 | : 0.10 |
| loss_120.1375     | : 0.07 |
| fragment_246.0975 | : 0.05 |
| fragment_377.1875 | : 0.05 |
| loss_30.0075      | : 0.05 |
| loss_180.1575     | : 0.04 |
| fragment_368.1775 | : 0.04 |
| loss_39.0175      | : 0.04 |
| fragment_133.1025 | : 0.03 |
| fragment_377.6875 | : 0.02 |
| loss_29.5075      | : 0.02 |
| fragment_121.0975 | : 0.02 |
| fragment_245.1475 | : 0.02 |

euphorbia\_motif\_277.m2m

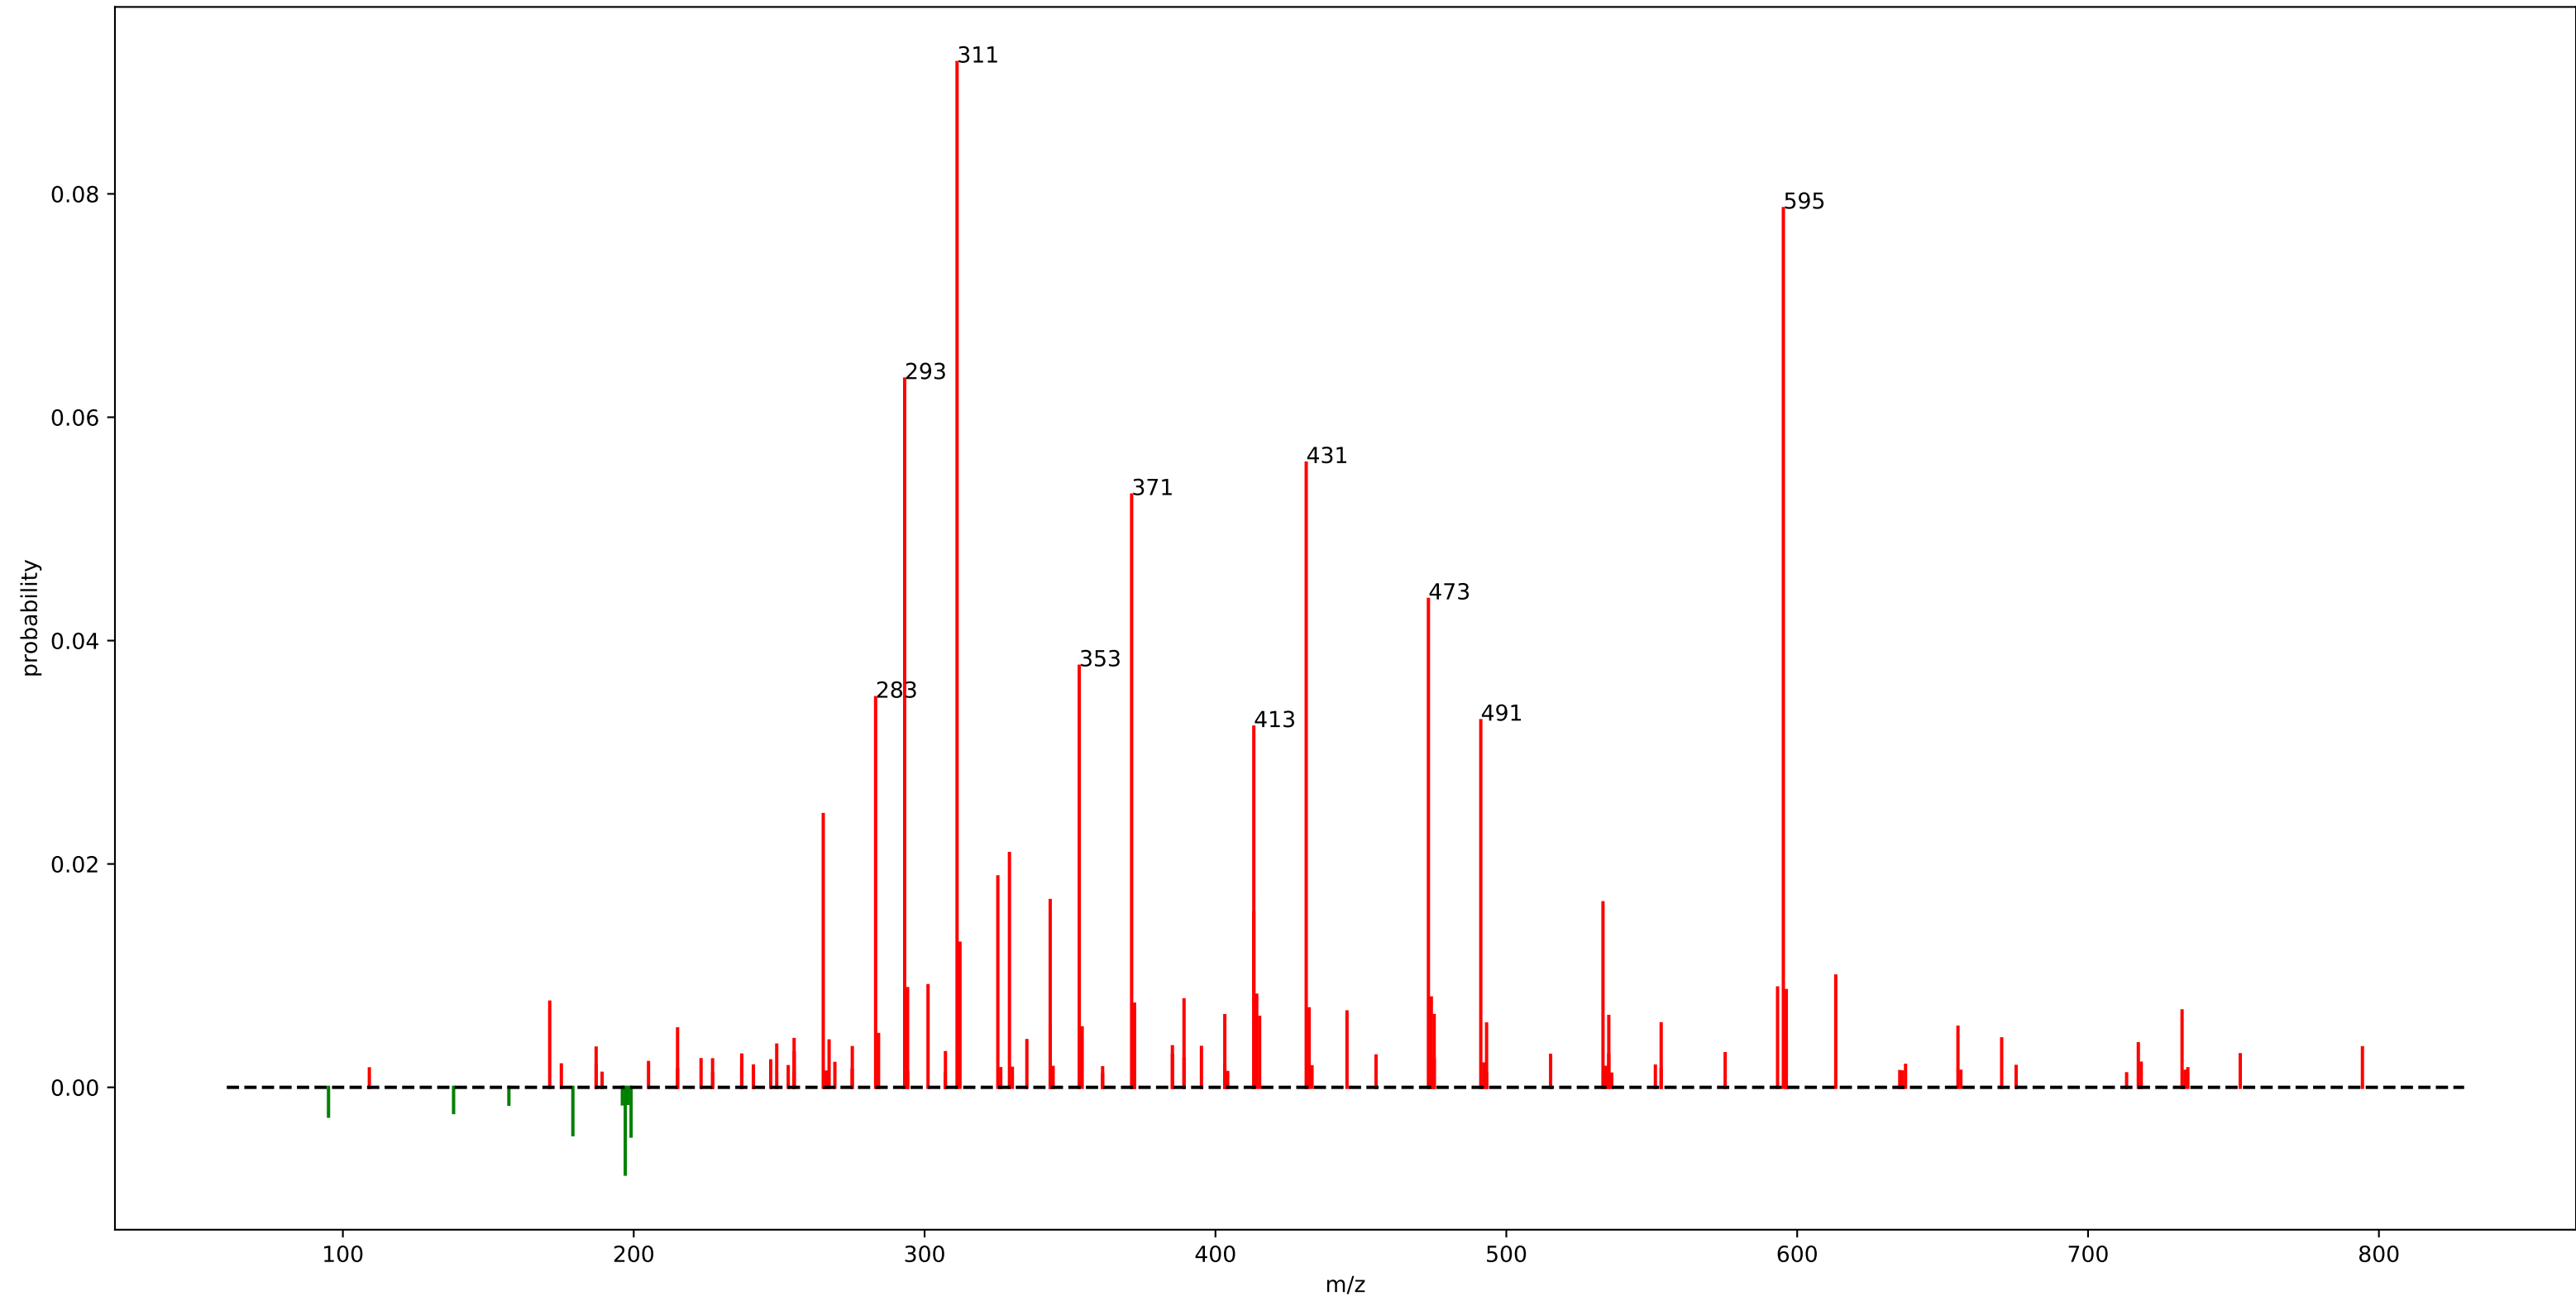

# euphorbia\_motif\_277.m2m

|                   |        |                   |        |                   |        |
|-------------------|--------|-------------------|--------|-------------------|--------|
| fragment_311.1625 | : 0.09 | fragment_294.1575 | : 0.01 | fragment_215.0675 | : 0.01 |
| fragment_595.2525 | : 0.08 | fragment_596.2575 | : 0.01 |                   |        |
| fragment_293.1525 | : 0.06 | fragment_414.1975 | : 0.01 |                   |        |
| fragment_431.2075 | : 0.06 | fragment_474.2175 | : 0.01 |                   |        |
| fragment_371.1825 | : 0.05 | fragment_389.1925 | : 0.01 |                   |        |
| fragment_473.2175 | : 0.04 | loss_197.0925     | : 0.01 |                   |        |
| fragment_353.1725 | : 0.04 | fragment_171.1175 | : 0.01 |                   |        |
| fragment_283.1675 | : 0.03 | fragment_372.1875 | : 0.01 |                   |        |
| fragment_491.2275 | : 0.03 | fragment_432.2075 | : 0.01 |                   |        |
| fragment_413.1925 | : 0.03 | fragment_732.3225 | : 0.01 |                   |        |
| fragment_265.1575 | : 0.02 | fragment_445.2225 | : 0.01 |                   |        |
| fragment_329.1725 | : 0.02 | fragment_475.2075 | : 0.01 |                   |        |
| fragment_325.1775 | : 0.02 | fragment_403.2125 | : 0.01 |                   |        |
| fragment_343.1875 | : 0.02 | fragment_535.2325 | : 0.01 |                   |        |
| fragment_533.2375 | : 0.02 | fragment_415.1875 | : 0.01 |                   |        |
| fragment_413.1975 | : 0.02 | fragment_553.2425 | : 0.01 |                   |        |
| fragment_312.1675 | : 0.01 | fragment_493.2175 | : 0.01 |                   |        |
| fragment_613.2625 | : 0.01 | fragment_343.1925 | : 0.01 |                   |        |
| fragment_301.1775 | : 0.01 | fragment_655.2725 | : 0.01 |                   |        |
| fragment_593.2575 | : 0.01 | fragment_354.1775 | : 0.01 |                   |        |

urine\_mass2motif\_66.m2m

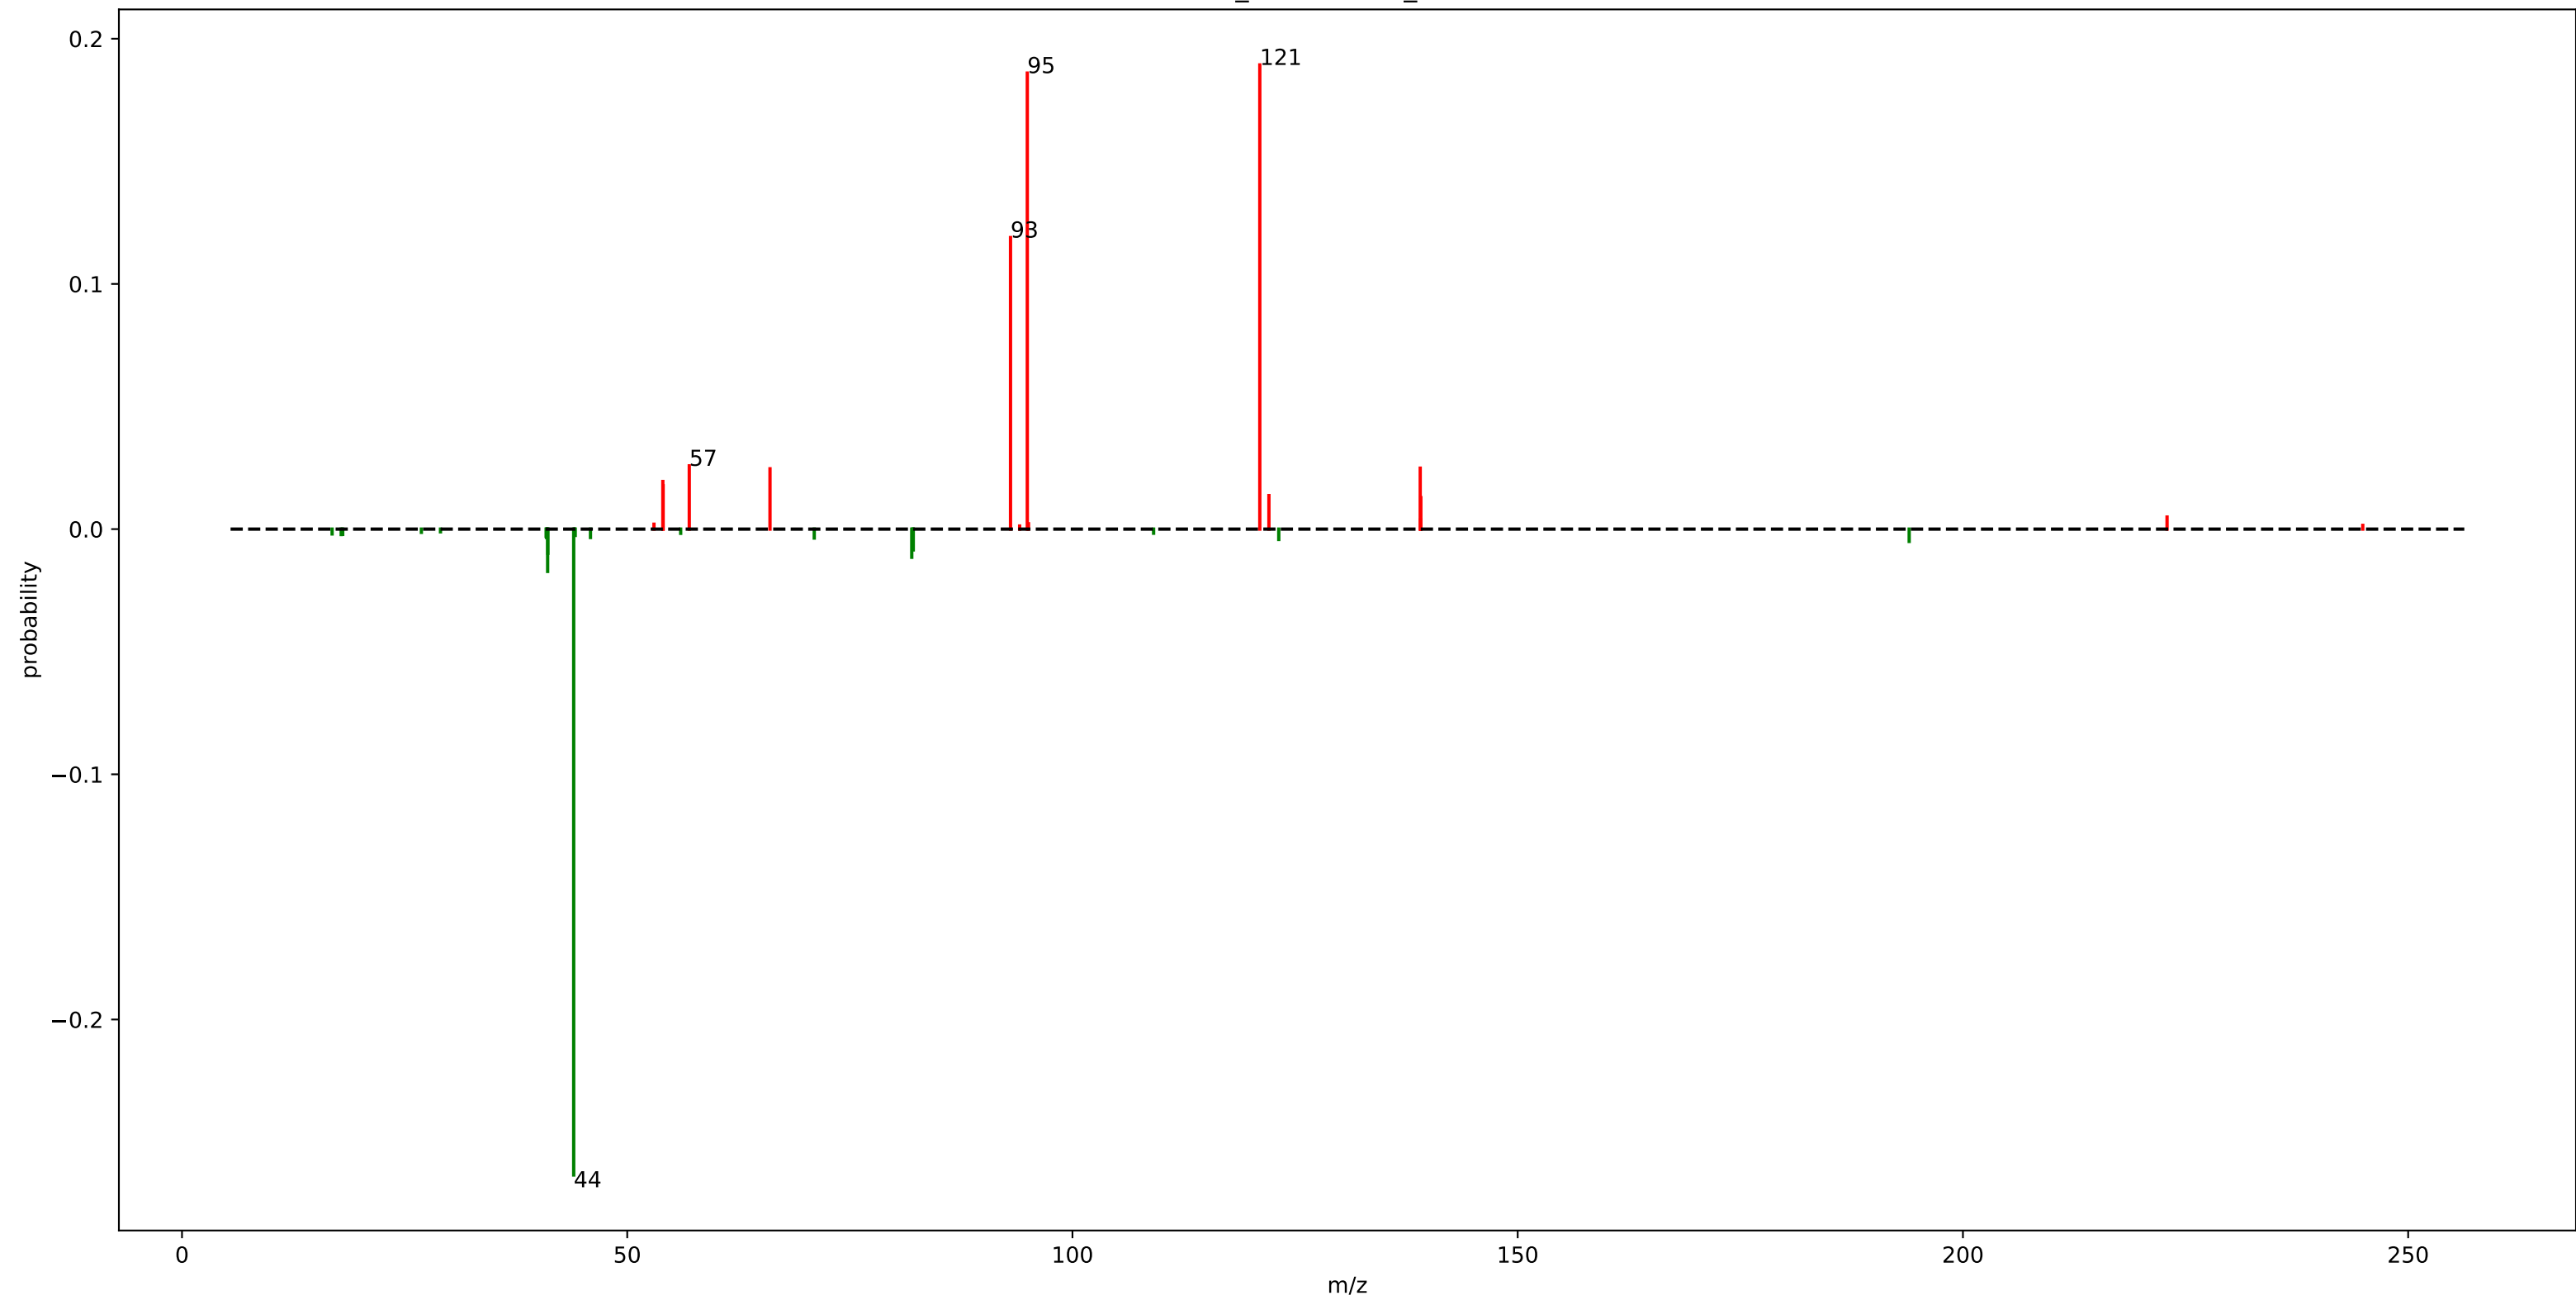

## urine\_mass2motif\_66.m2m

|                   |        |
|-------------------|--------|
| loss_43.9875      | : 0.26 |
| fragment_121.0375 | : 0.19 |
| fragment_94.9275  | : 0.19 |
| fragment_93.0425  | : 0.12 |
| fragment_56.9675  | : 0.03 |
| fragment_139.0525 | : 0.02 |
| fragment_66.0325  | : 0.02 |
| fragment_53.9975  | : 0.02 |
| fragment_54.0325  | : 0.02 |
| loss_41.0625      | : 0.02 |
| fragment_122.0625 | : 0.01 |
| fragment_139.1225 | : 0.01 |
| loss_81.9525      | : 0.01 |
| loss_41.0875      | : 0.01 |
| loss_82.1225      | : 0.01 |
| loss_193.9625     | : 0.01 |

gnps\_motif\_66.m2m

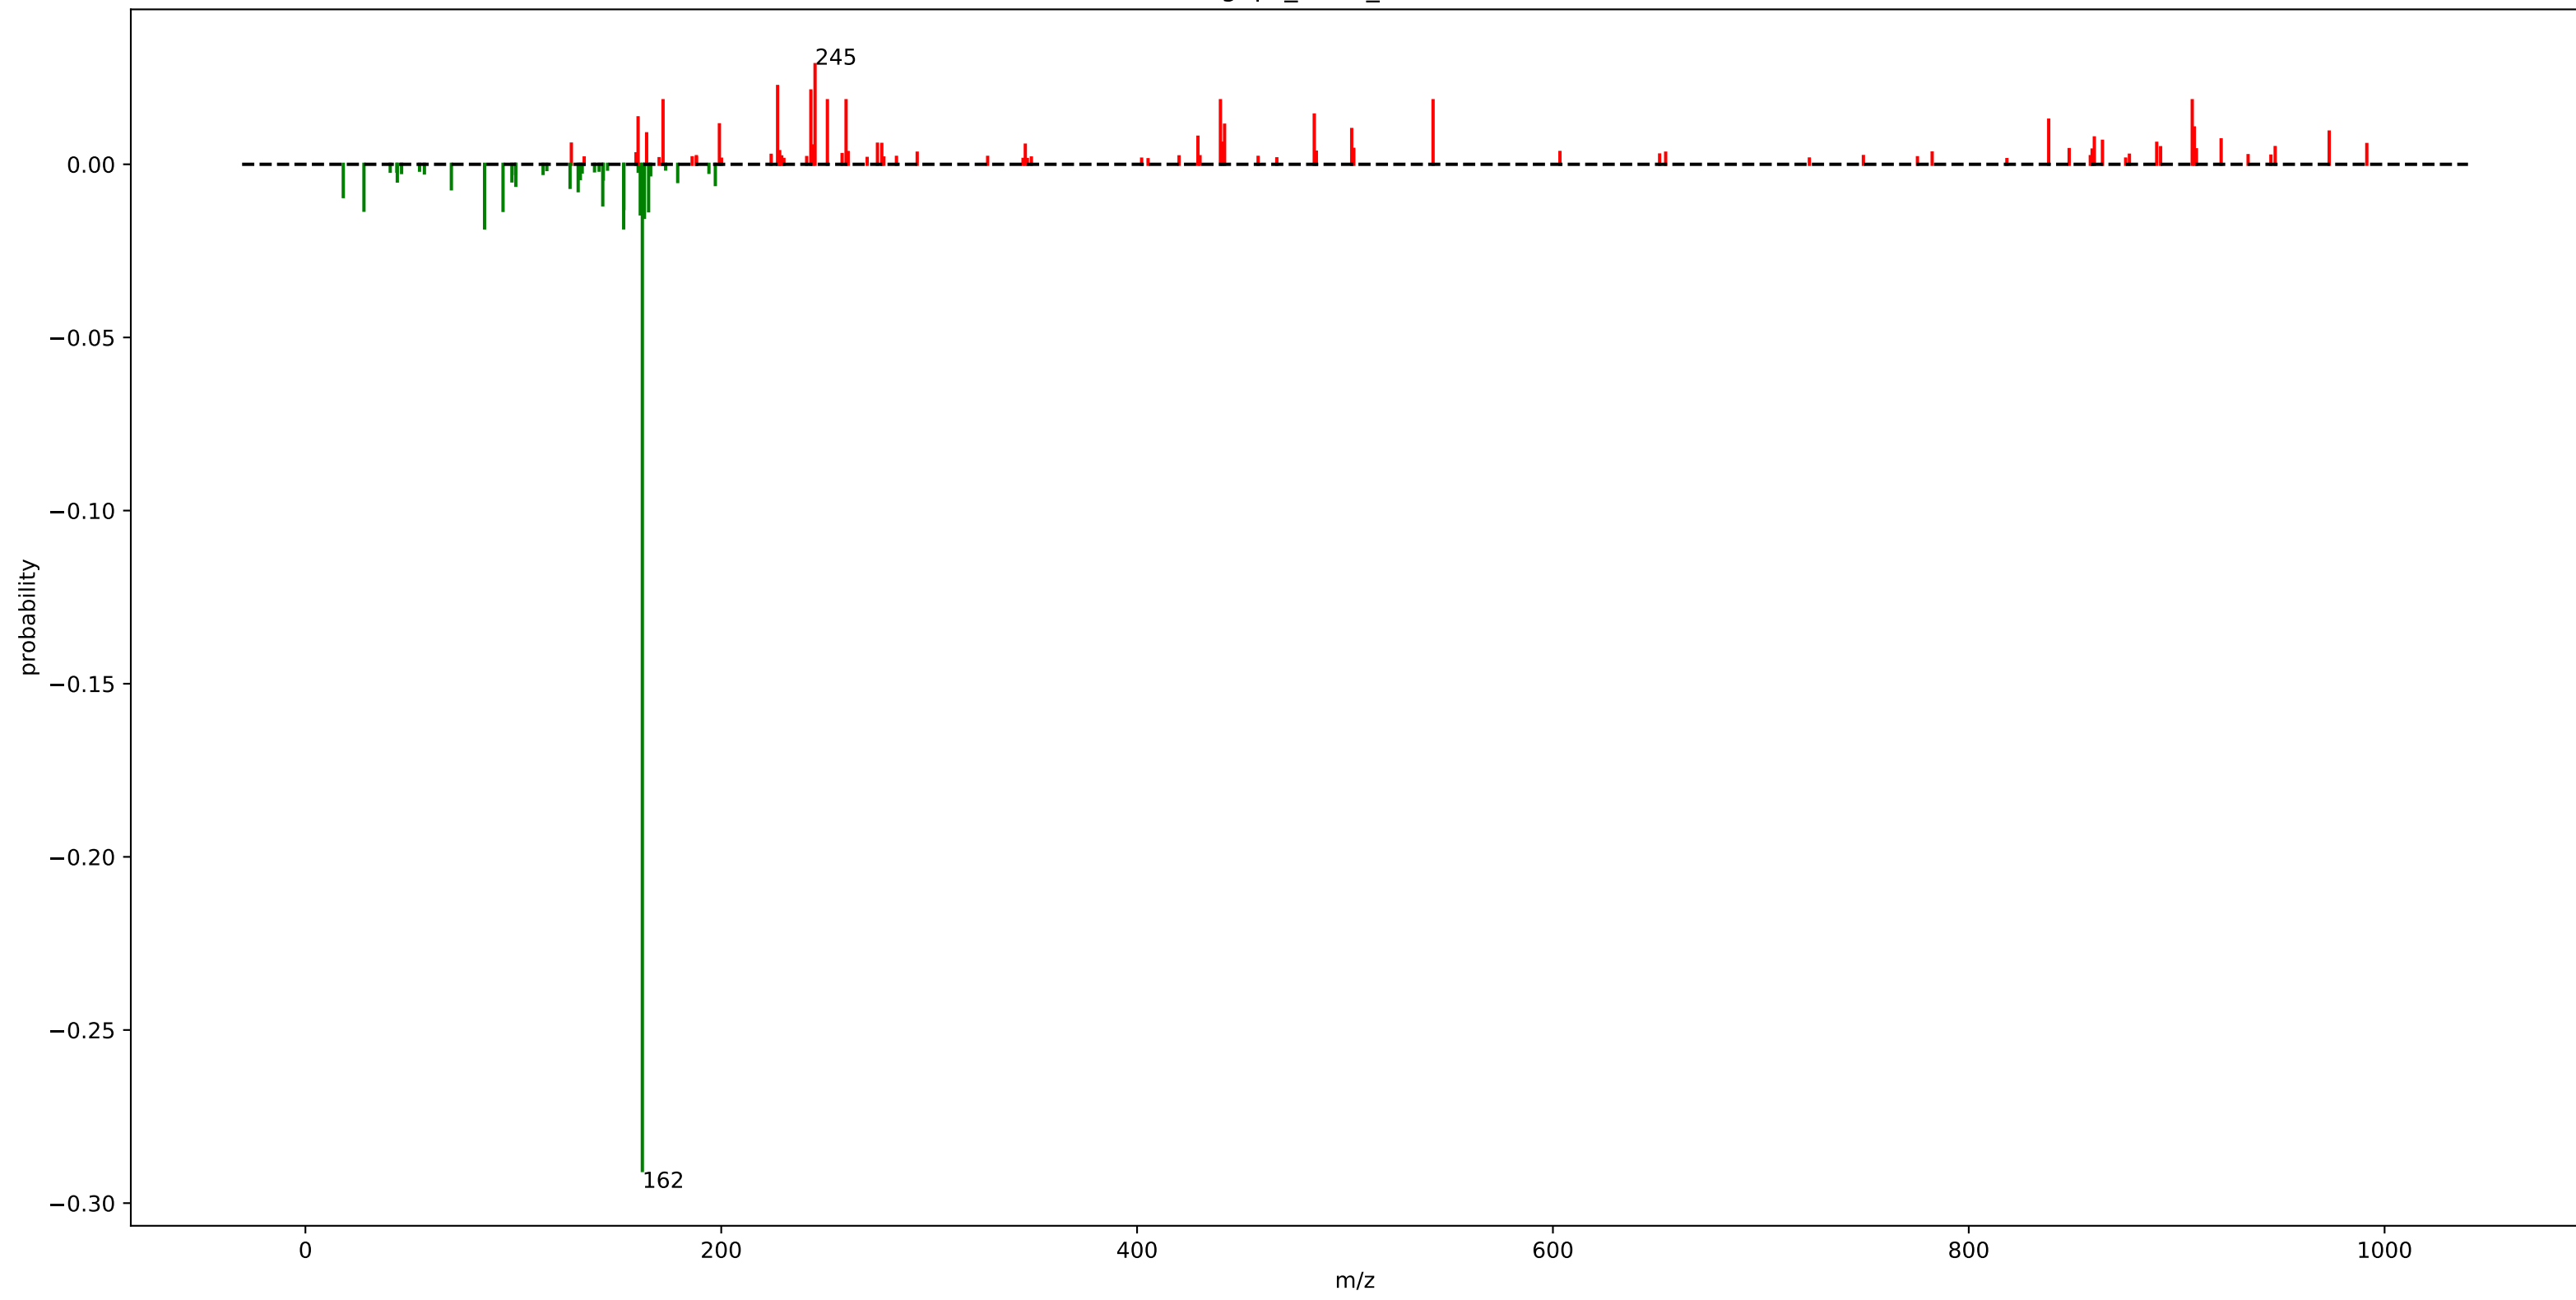

# gnps\_motif\_66.m2m

|                   |        |                   |        |                   |        |
|-------------------|--------|-------------------|--------|-------------------|--------|
| loss_162.0525     | : 0.29 | fragment_838.4525 | : 0.01 | fragment_127.9075 | : 0.01 |
| fragment_245.1175 | : 0.03 | loss_143.0175     | : 0.01 | fragment_275.1425 | : 0.01 |
| fragment_227.1075 | : 0.02 | fragment_199.1125 | : 0.01 | fragment_277.2175 | : 0.01 |
| fragment_243.0975 | : 0.02 | fragment_442.0825 | : 0.01 | fragment_991.4575 | : 0.01 |
| fragment_542.3575 | : 0.02 | fragment_908.5025 | : 0.01 | fragment_346.2375 | : 0.01 |
| fragment_260.0375 | : 0.02 | fragment_503.2275 | : 0.01 | fragment_244.1075 | : 0.01 |
| fragment_440.0875 | : 0.02 | fragment_973.3675 | : 0.01 |                   |        |
| loss_86.1675      | : 0.02 | loss_18.2125      | : 0.01 |                   |        |
| fragment_907.4875 | : 0.02 | fragment_164.1075 | : 0.01 |                   |        |
| fragment_172.0025 | : 0.02 | fragment_429.2725 | : 0.01 |                   |        |
| fragment_251.0575 | : 0.02 | loss_131.1875     | : 0.01 |                   |        |
| loss_153.0675     | : 0.02 | fragment_860.3925 | : 0.01 |                   |        |
| loss_163.0625     | : 0.02 | fragment_921.3875 | : 0.01 |                   |        |
| loss_161.0475     | : 0.01 | loss_70.1975      | : 0.01 |                   |        |
| fragment_485.2175 | : 0.01 | loss_127.2775     | : 0.01 |                   |        |
| fragment_160.0025 | : 0.01 | fragment_864.3075 | : 0.01 |                   |        |
| loss_165.0625     | : 0.01 | fragment_441.0925 | : 0.01 |                   |        |
| loss_95.0475      | : 0.01 | fragment_890.4025 | : 0.01 |                   |        |
| loss_28.1525      | : 0.01 | loss_101.1875     | : 0.01 |                   |        |
| loss_153.1725     | : 0.01 | loss_197.1525     | : 0.01 |                   |        |



gnps\_motif\_34.m2m

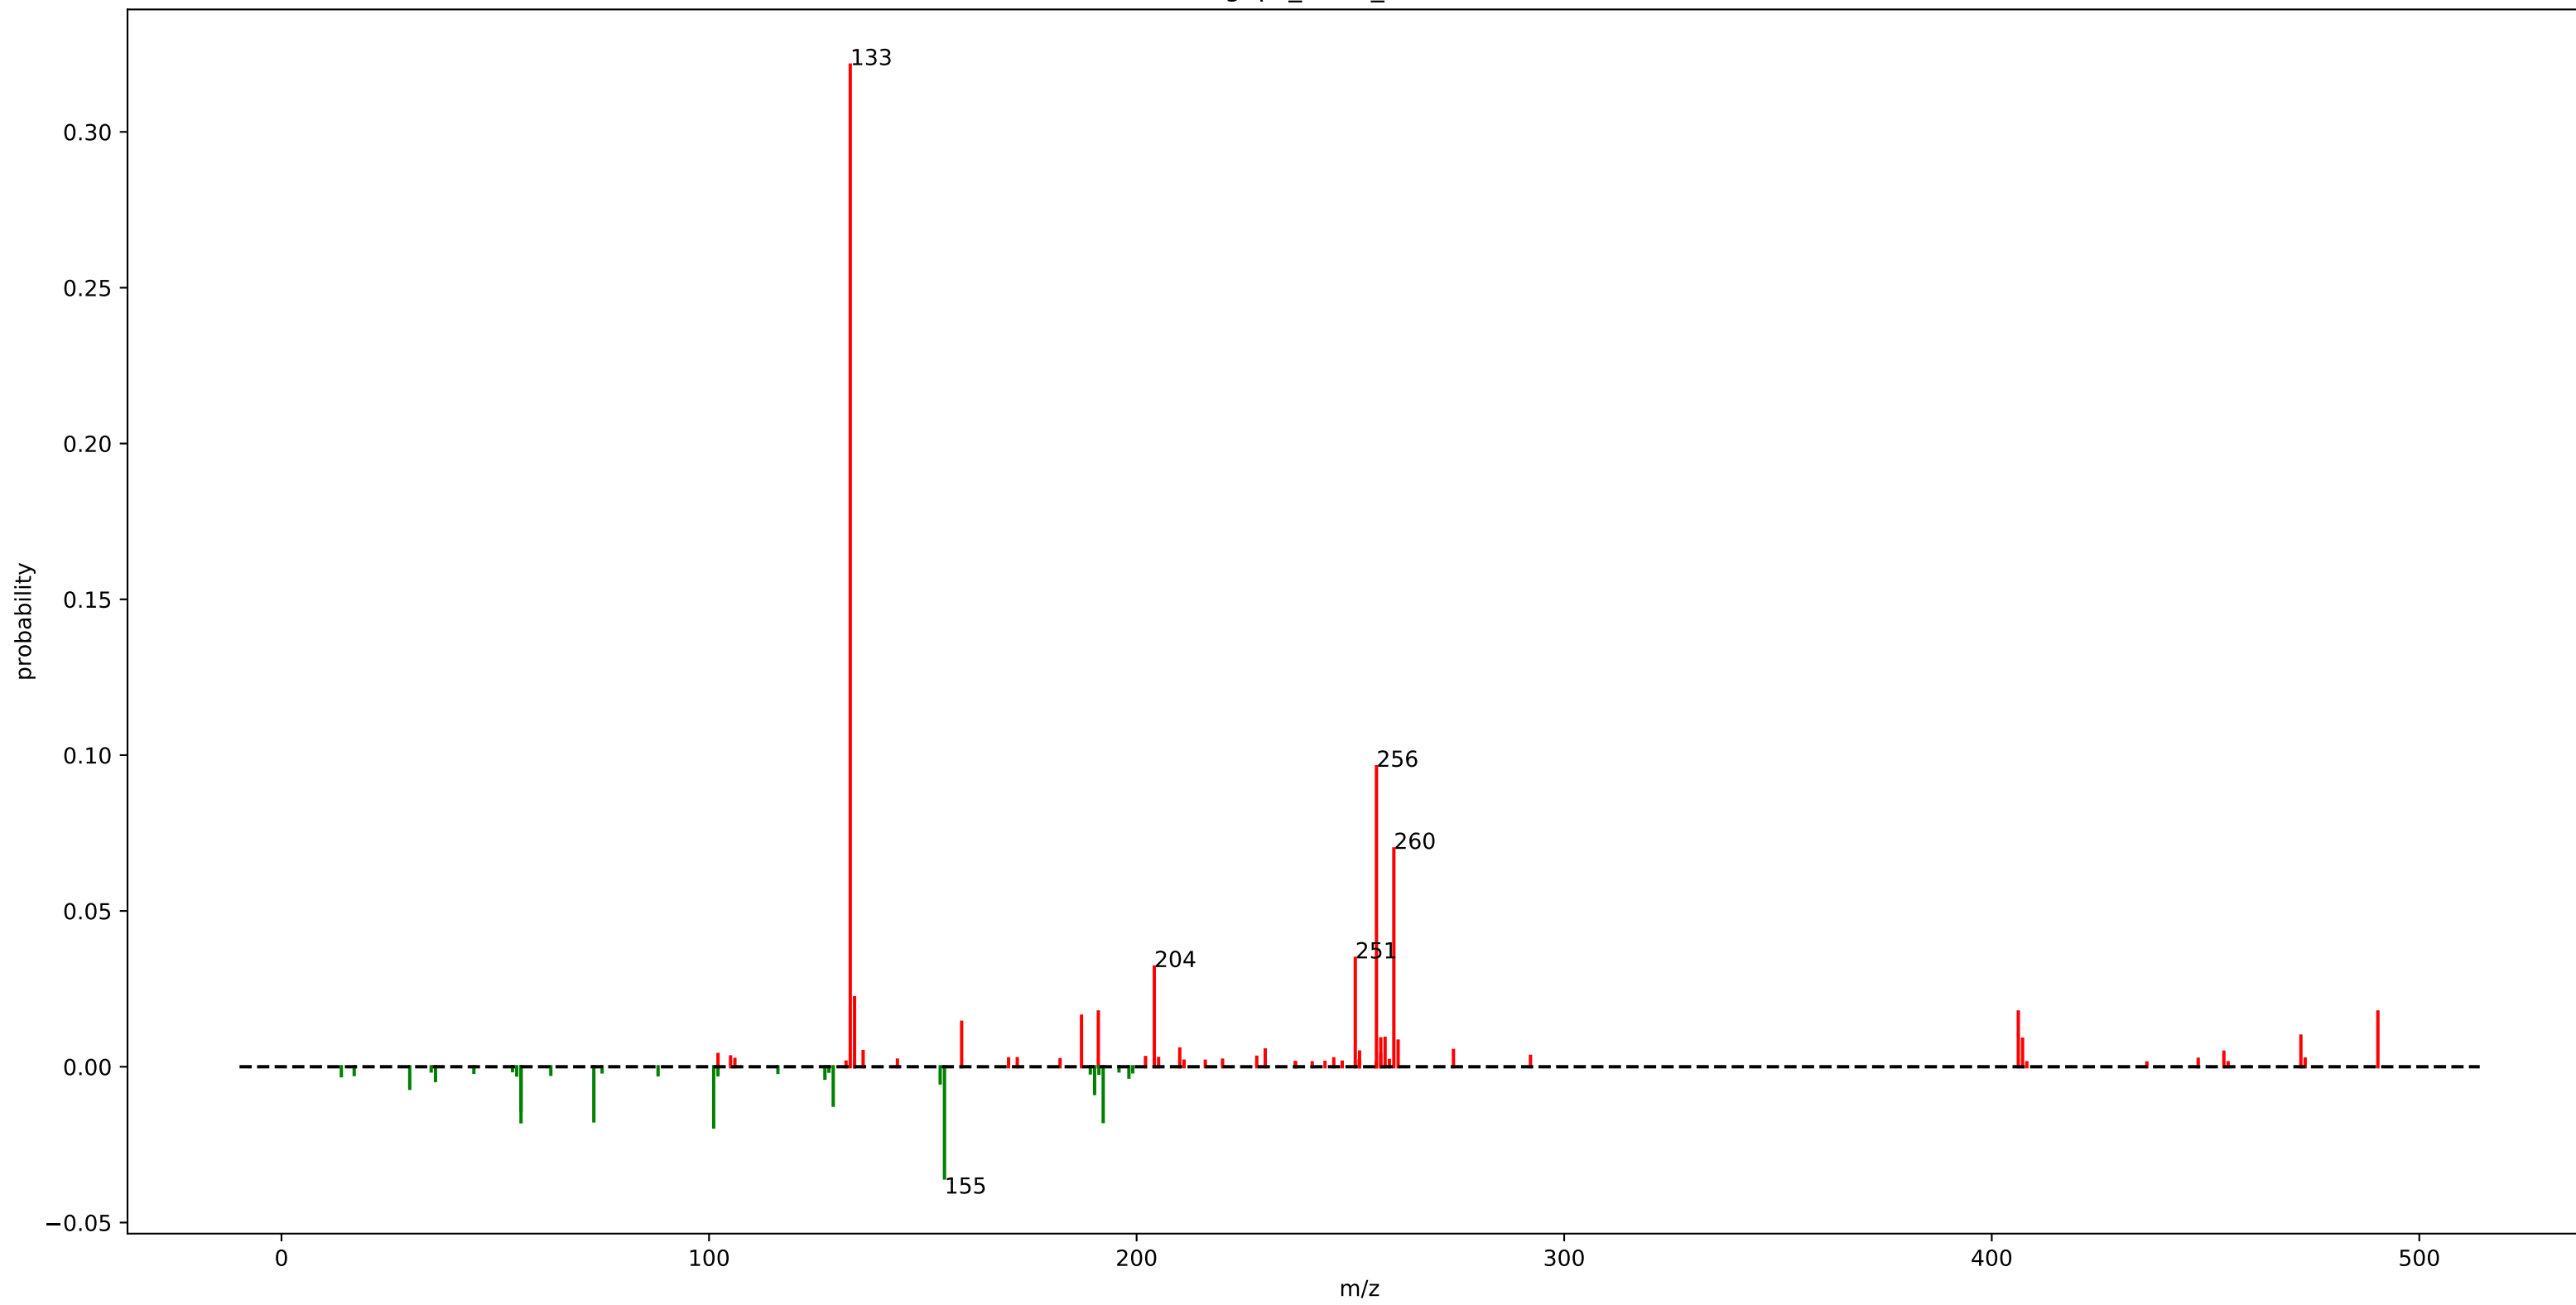

# gnps\_motif\_34.m2m

|                   |        |                   |        |
|-------------------|--------|-------------------|--------|
| fragment_133.0275 | : 0.32 | fragment_257.1025 | : 0.01 |
| fragment_256.0975 | : 0.10 | fragment_407.2125 | : 0.01 |
| fragment_260.1625 | : 0.07 | loss_190.1725     | : 0.01 |
| loss_155.0675     | : 0.04 | fragment_261.1675 | : 0.01 |
| fragment_251.1425 | : 0.03 | loss_29.9975      | : 0.01 |
| fragment_204.1375 | : 0.03 | fragment_210.0925 | : 0.01 |
| fragment_134.0325 | : 0.02 | fragment_230.0825 | : 0.01 |
| loss_101.0825     | : 0.02 | fragment_274.1075 | : 0.01 |
| loss_56.0225      | : 0.02 | loss_154.0625     | : 0.01 |
| loss_192.1875     | : 0.02 |                   |        |
| fragment_406.2125 | : 0.02 |                   |        |
| fragment_490.3125 | : 0.02 |                   |        |
| fragment_191.0475 | : 0.02 |                   |        |
| loss_73.0525      | : 0.02 |                   |        |
| fragment_187.1125 | : 0.02 |                   |        |
| fragment_159.0825 | : 0.01 |                   |        |
| loss_56.0275      | : 0.01 |                   |        |
| loss_129.0425     | : 0.01 |                   |        |
| fragment_472.3025 | : 0.01 |                   |        |
| fragment_258.1125 | : 0.01 |                   |        |

motif\_445

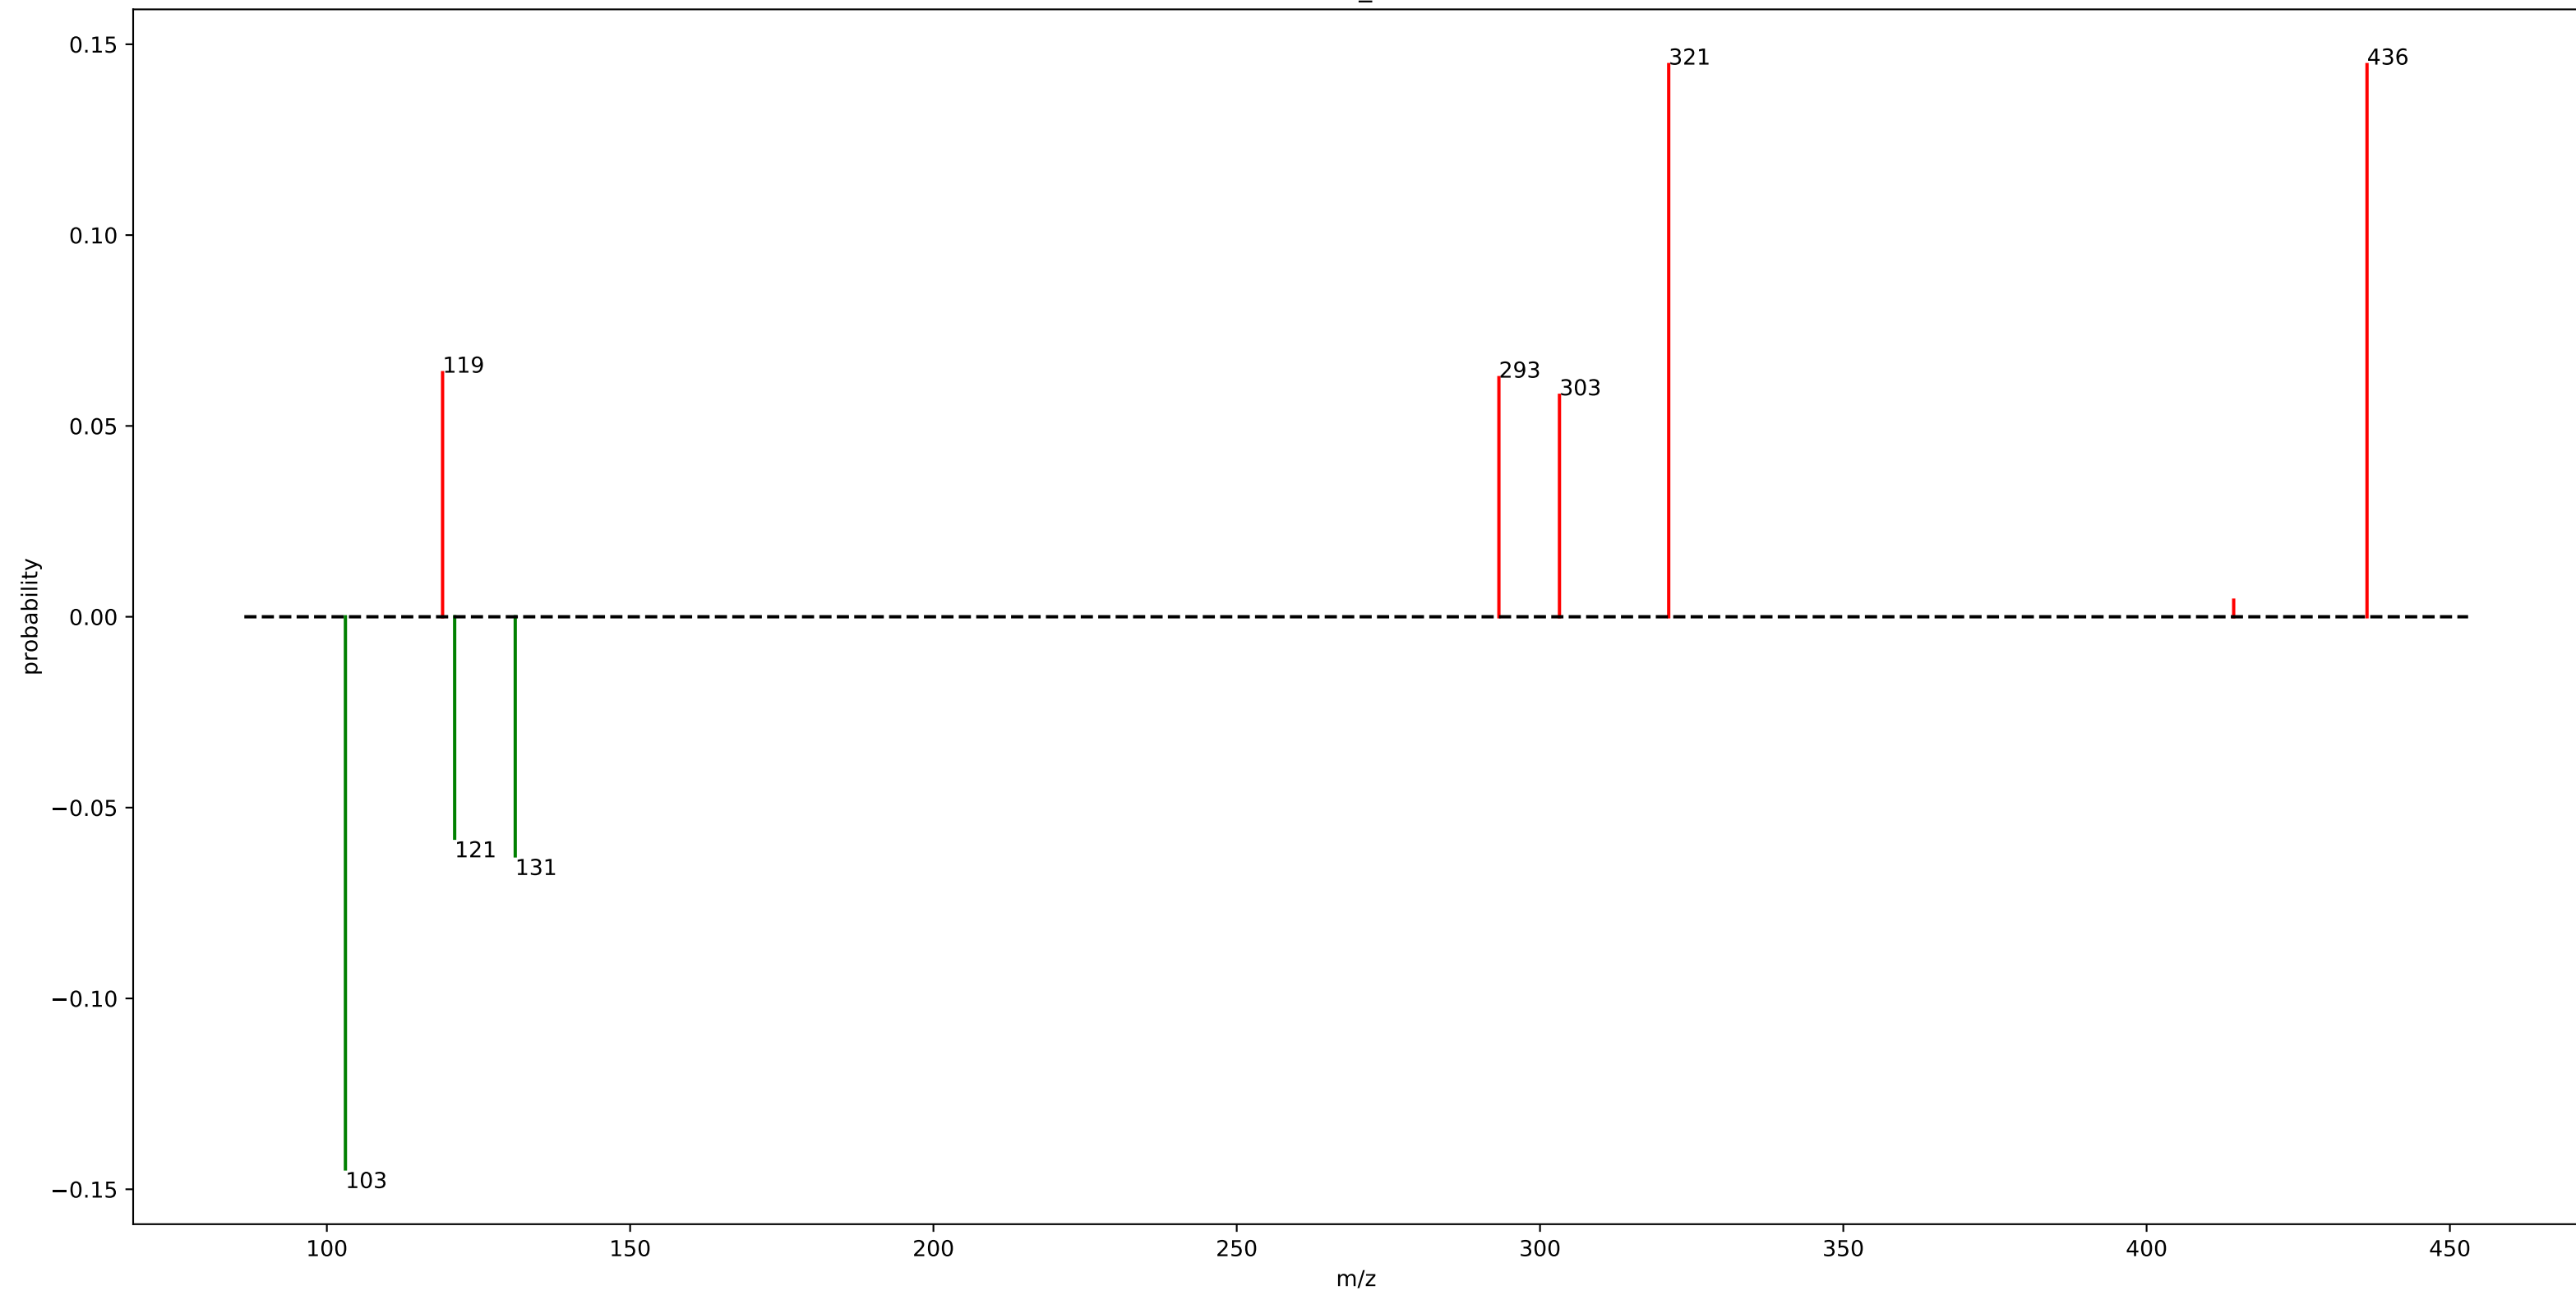

## motif\_445

|                   |        |
|-------------------|--------|
| loss_103.0625     | : 0.14 |
| fragment_321.2175 | : 0.14 |
| fragment_436.3375 | : 0.14 |
| fragment_119.0825 | : 0.06 |
| loss_131.0575     | : 0.06 |
| fragment_293.2225 | : 0.06 |
| loss_121.0725     | : 0.06 |
| fragment_303.2075 | : 0.06 |

euphorbia\_motif\_350.m2m

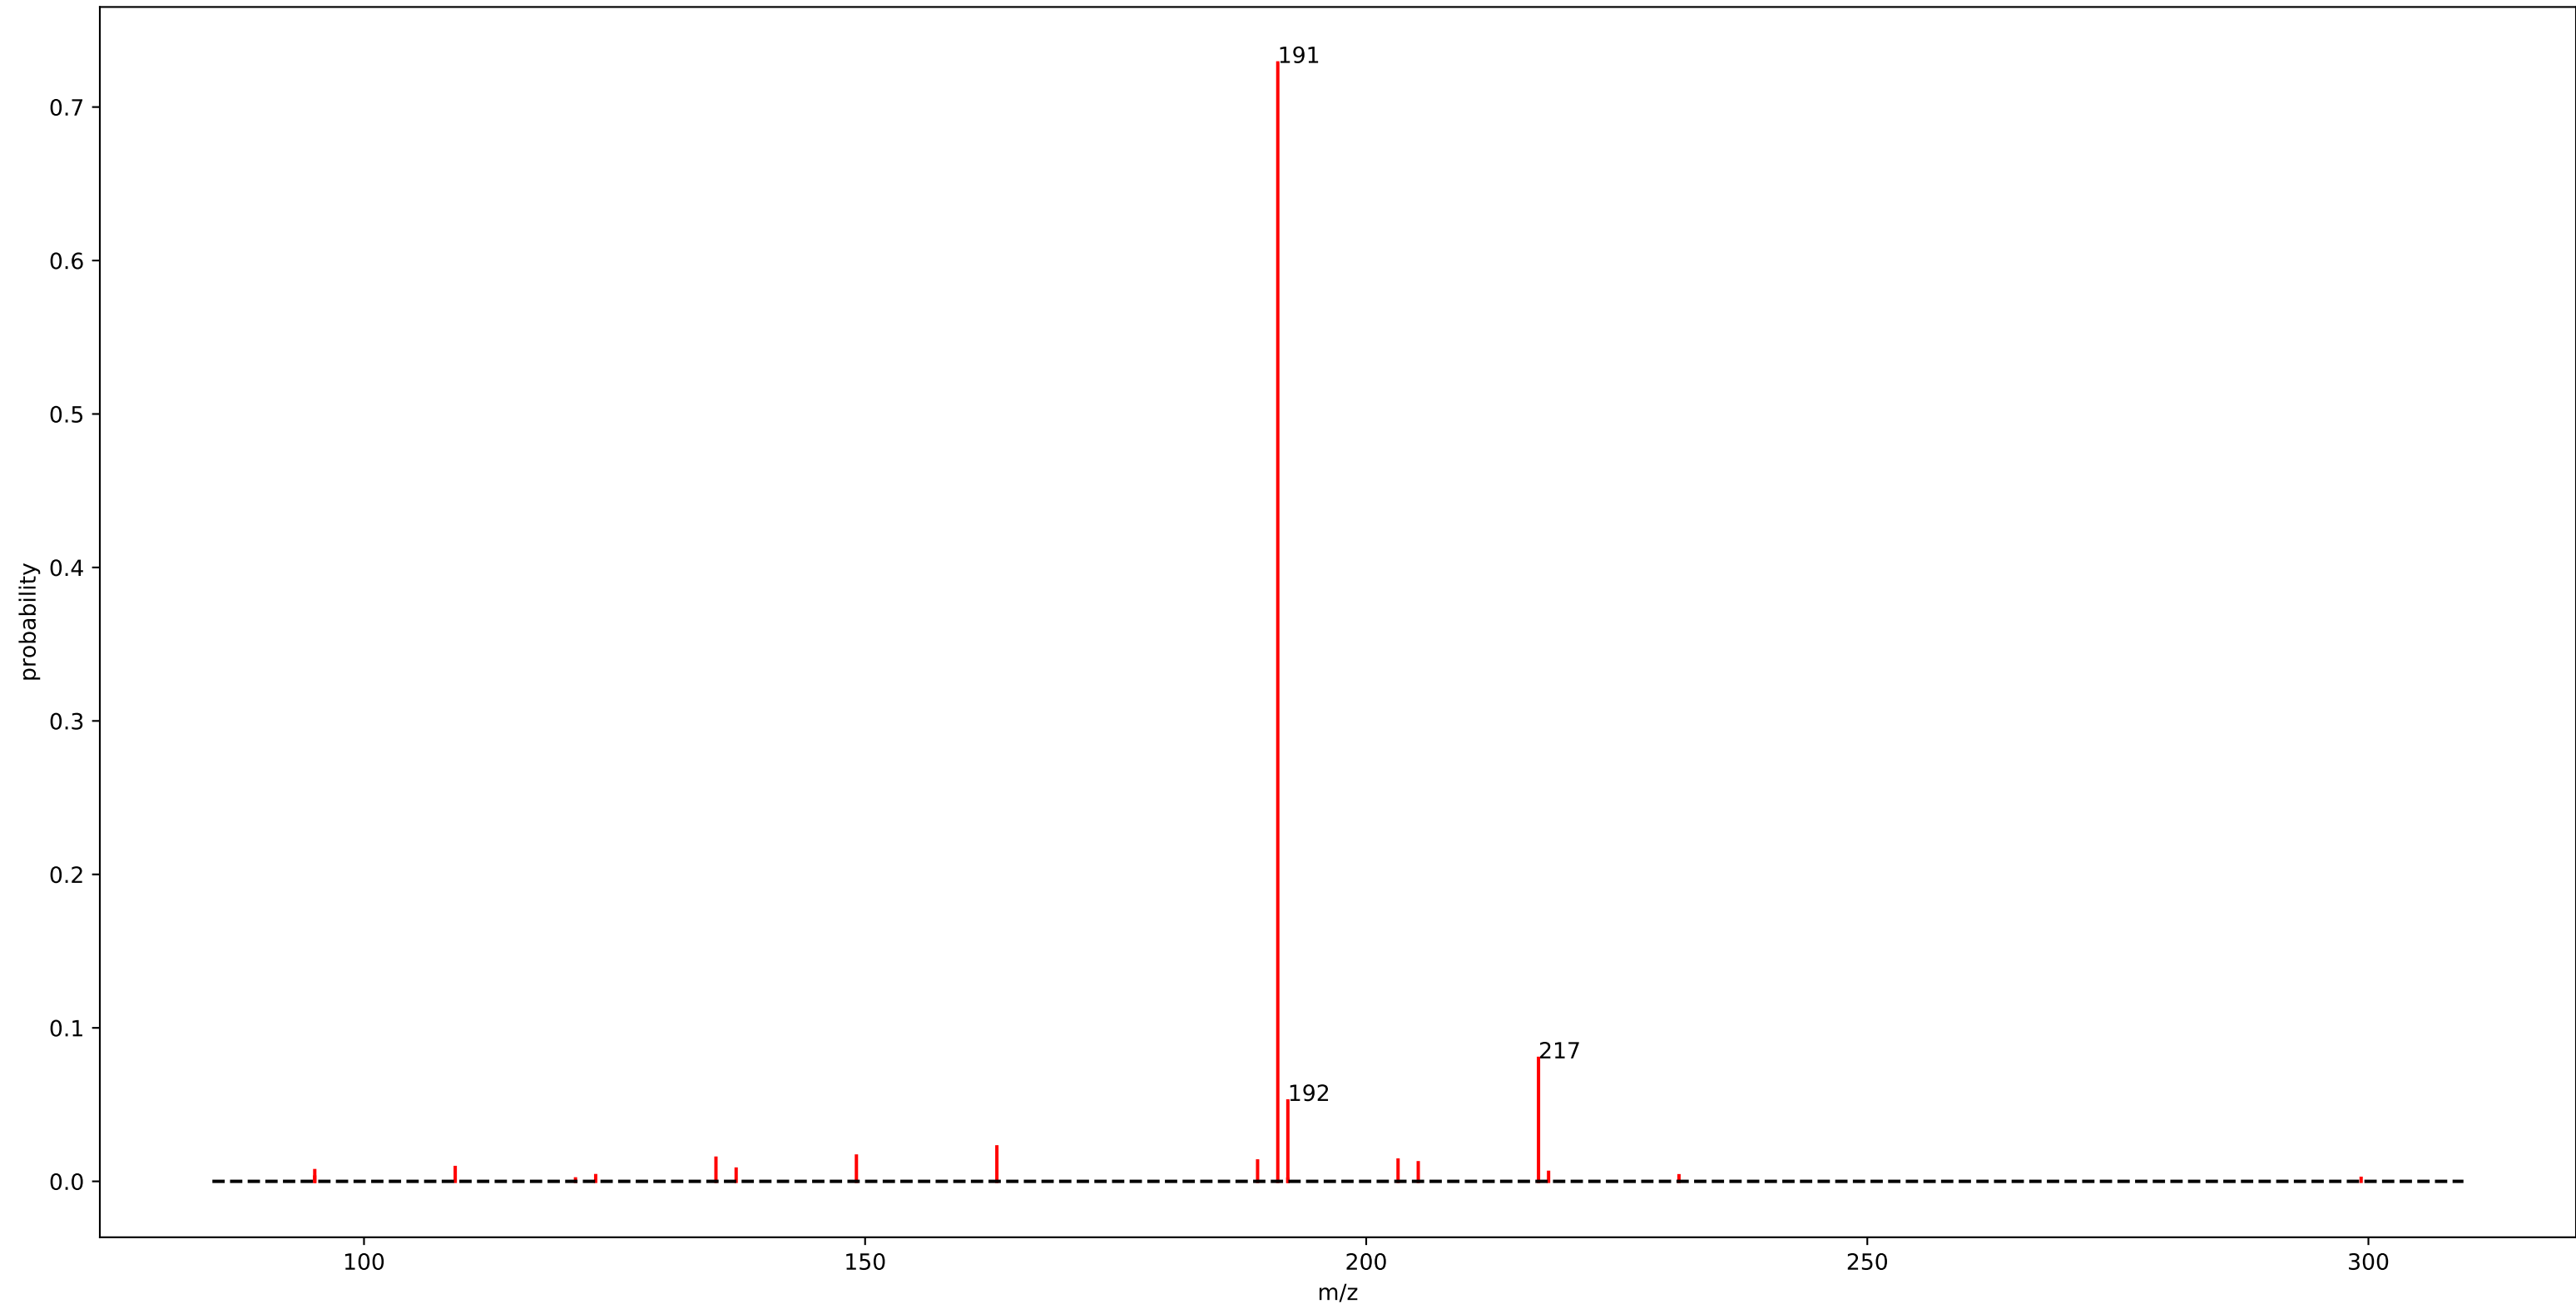

## euphorbia\_motif\_350.m2m

|                   |        |
|-------------------|--------|
| fragment_191.1775 | : 0.73 |
| fragment_217.1925 | : 0.08 |
| fragment_192.1825 | : 0.05 |
| fragment_163.1475 | : 0.02 |
| fragment_149.1325 | : 0.02 |
| fragment_135.1175 | : 0.02 |
| fragment_203.1775 | : 0.01 |
| fragment_189.1625 | : 0.01 |
| fragment_205.1925 | : 0.01 |
| fragment_109.1025 | : 0.01 |
| fragment_137.1325 | : 0.01 |
| fragment_95.0875  | : 0.01 |
| fragment_218.1975 | : 0.01 |

motif\_447

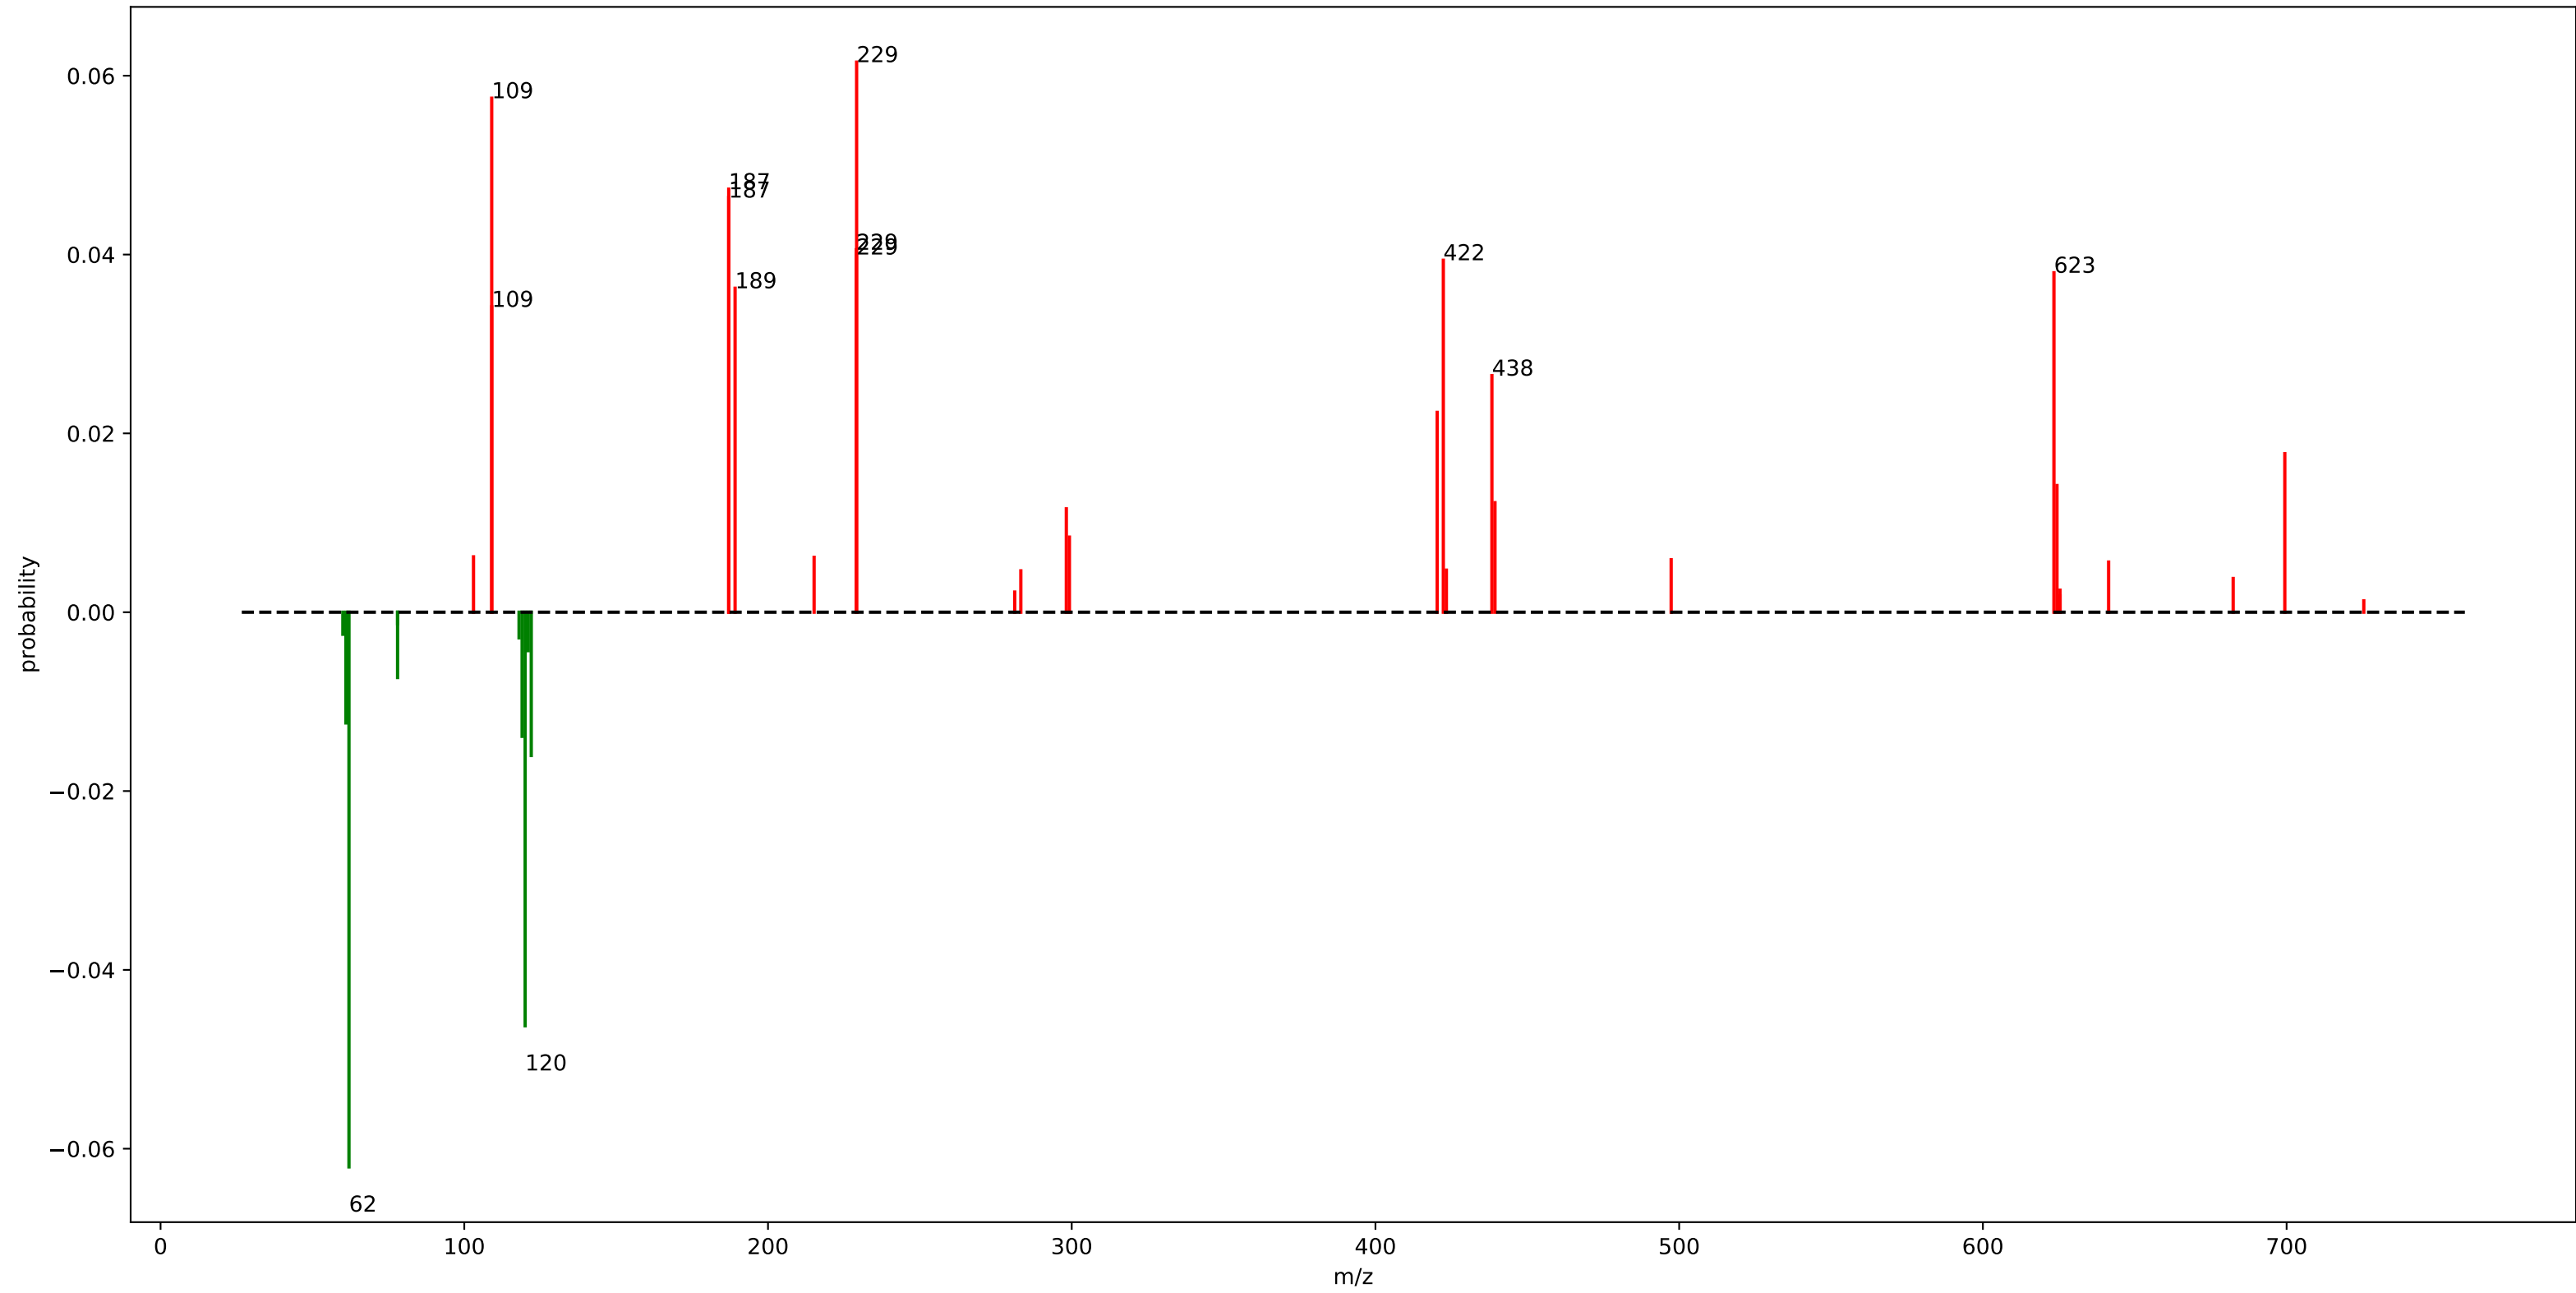

## motif\_447

|                   |        |                   |        |
|-------------------|--------|-------------------|--------|
| loss_62.0325      | : 0.06 | fragment_298.2225 | : 0.01 |
| fragment_229.1775 | : 0.06 | fragment_299.2375 | : 0.01 |
| fragment_109.0325 | : 0.06 | loss_78.0375      | : 0.01 |
| fragment_187.0675 | : 0.05 | fragment_103.0375 | : 0.01 |
| fragment_187.0625 | : 0.05 | fragment_215.1775 | : 0.01 |
| loss_120.0425     | : 0.05 | fragment_497.3625 | : 0.01 |
| fragment_229.0825 | : 0.04 | fragment_641.3975 | : 0.01 |
| fragment_229.1075 | : 0.04 |                   |        |
| fragment_422.3475 | : 0.04 |                   |        |
| fragment_623.3925 | : 0.04 |                   |        |
| fragment_189.1625 | : 0.04 |                   |        |
| fragment_109.0575 | : 0.03 |                   |        |
| fragment_438.3425 | : 0.03 |                   |        |
| fragment_420.3325 | : 0.02 |                   |        |
| fragment_699.4075 | : 0.02 |                   |        |
| loss_122.0525     | : 0.02 |                   |        |
| fragment_624.3975 | : 0.01 |                   |        |
| loss_119.0375     | : 0.01 |                   |        |
| loss_61.0325      | : 0.01 |                   |        |
| fragment_439.3575 | : 0.01 |                   |        |



motif\_446

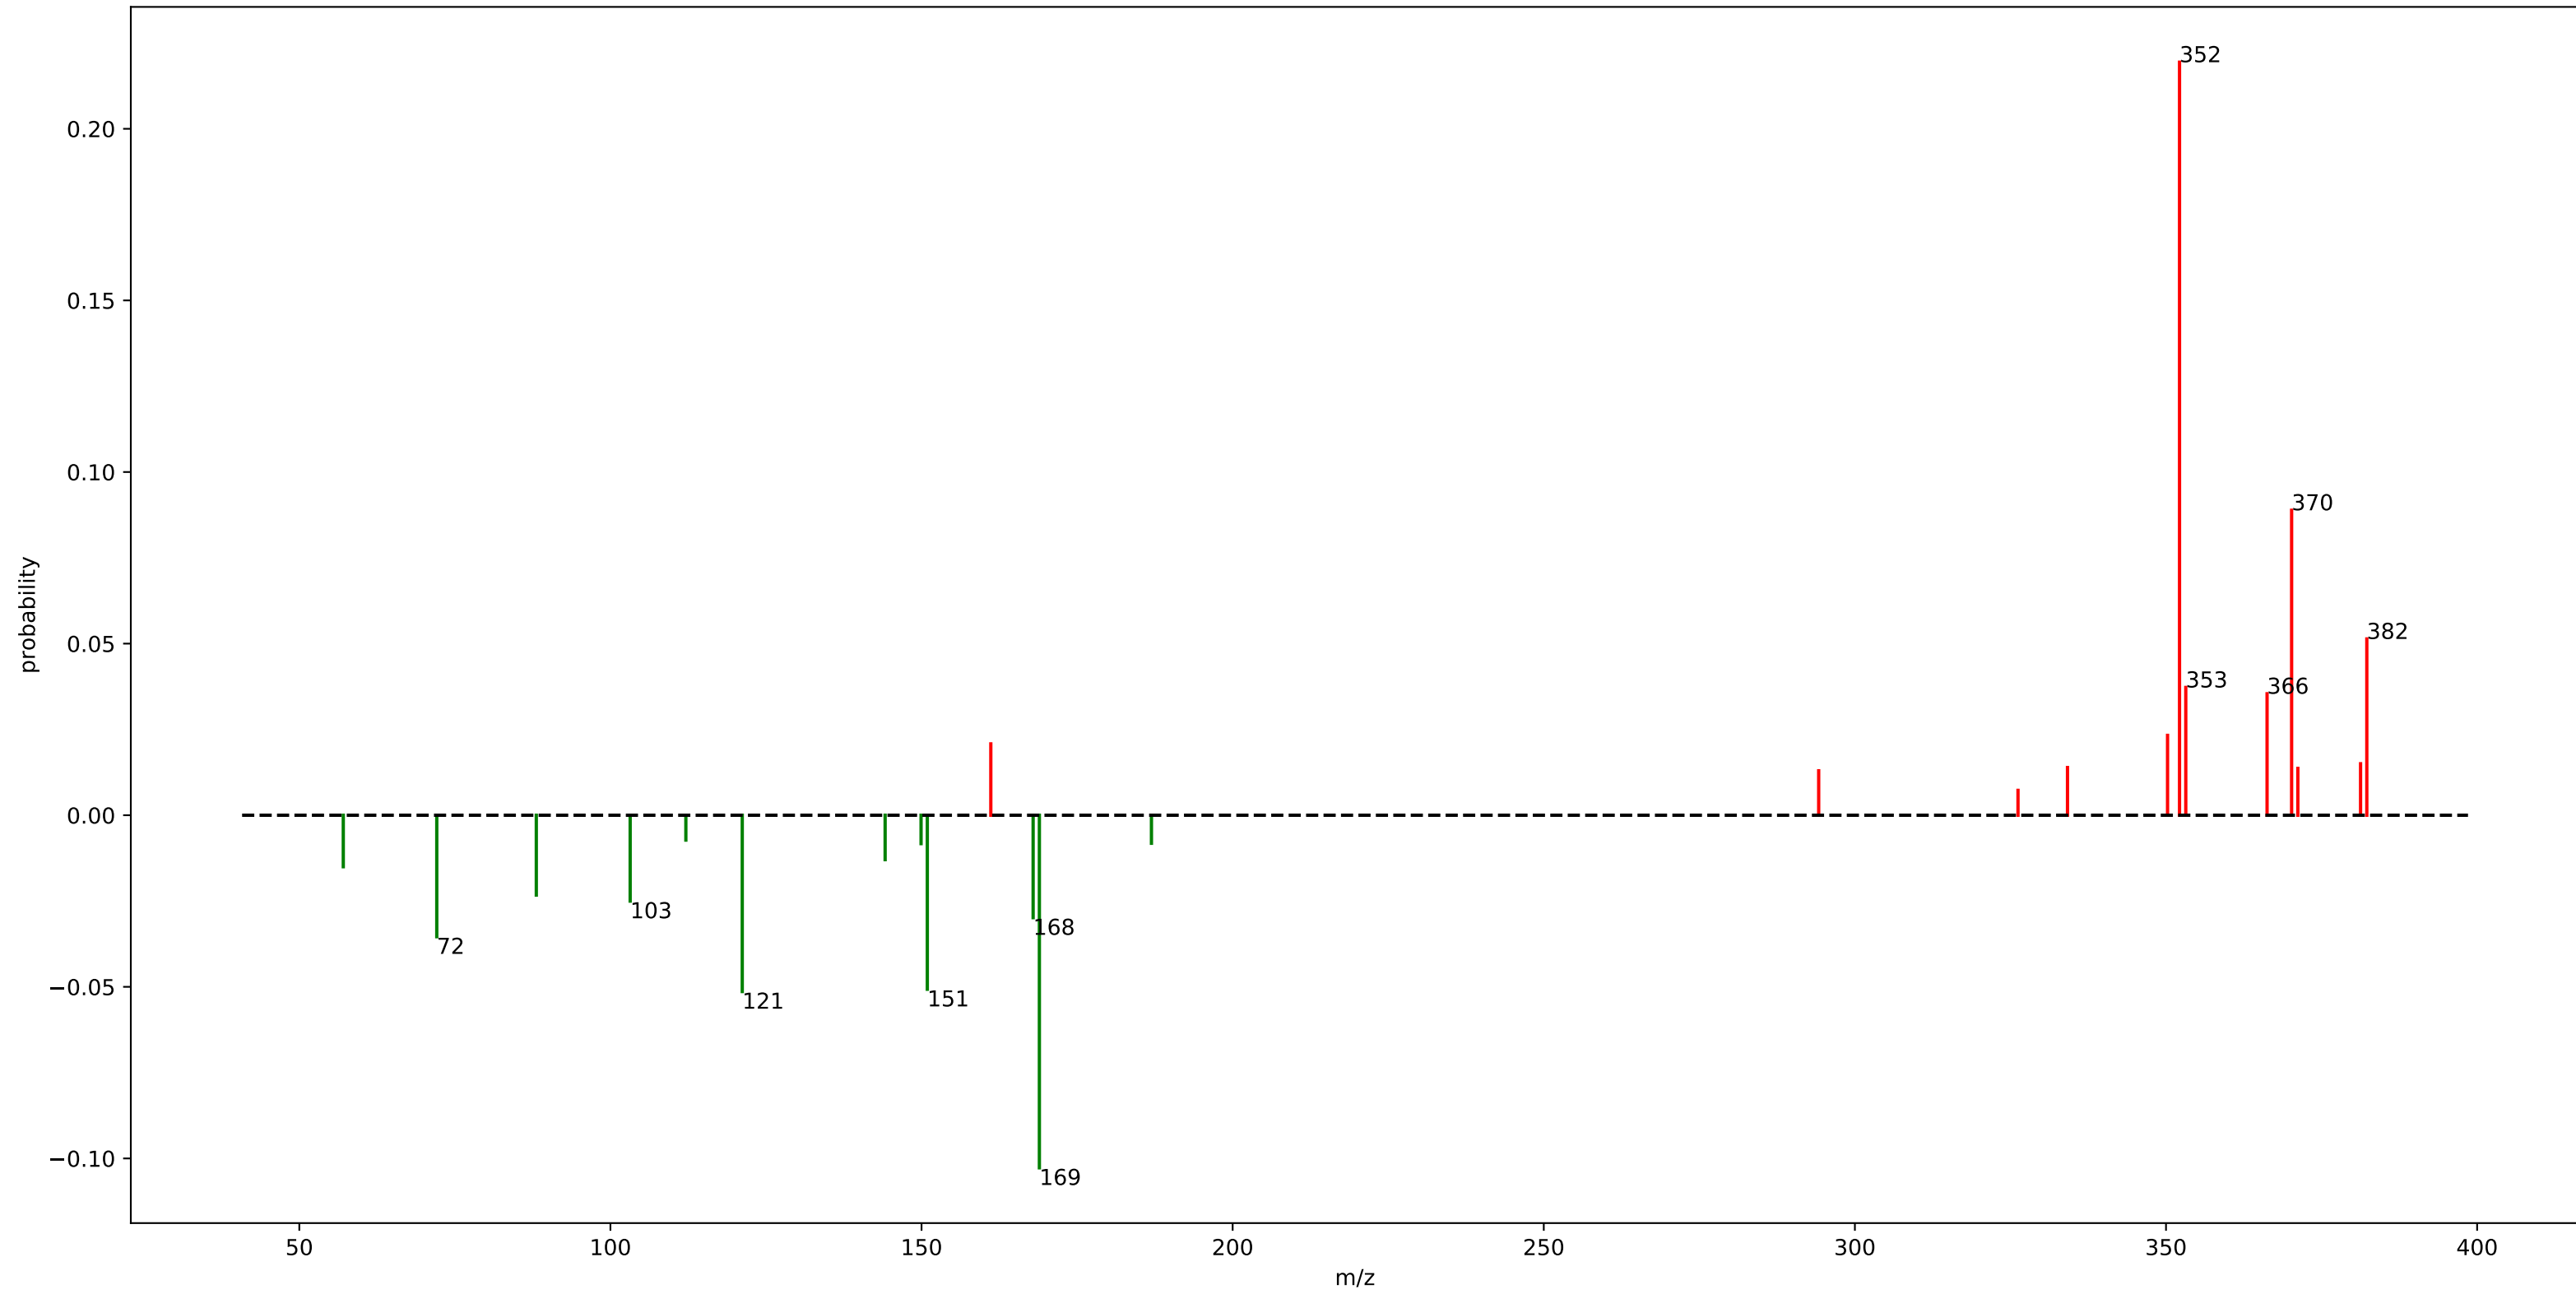

## motif\_446

|                   |        |                   |        |
|-------------------|--------|-------------------|--------|
| fragment_352.1725 | : 0.22 | loss_149.9225     | : 0.01 |
| loss_168.9375     | : 0.10 | loss_186.9475     | : 0.01 |
| fragment_370.1875 | : 0.09 | loss_112.1225     | : 0.01 |
| loss_121.1875     | : 0.05 | fragment_326.2125 | : 0.01 |
| fragment_382.2725 | : 0.05 |                   |        |
| loss_150.9275     | : 0.05 |                   |        |
| fragment_353.1775 | : 0.04 |                   |        |
| fragment_366.2425 | : 0.04 |                   |        |
| loss_72.0925      | : 0.04 |                   |        |
| loss_167.9325     | : 0.03 |                   |        |
| loss_103.1725     | : 0.03 |                   |        |
| loss_88.0875      | : 0.02 |                   |        |
| fragment_350.2475 | : 0.02 |                   |        |
| fragment_161.1325 | : 0.02 |                   |        |
| loss_57.0675      | : 0.02 |                   |        |
| fragment_381.2675 | : 0.02 |                   |        |
| fragment_334.1675 | : 0.01 |                   |        |
| fragment_371.1875 | : 0.01 |                   |        |
| loss_144.1475     | : 0.01 |                   |        |
| fragment_294.1825 | : 0.01 |                   |        |

urine\_mass2motif\_38.m2m

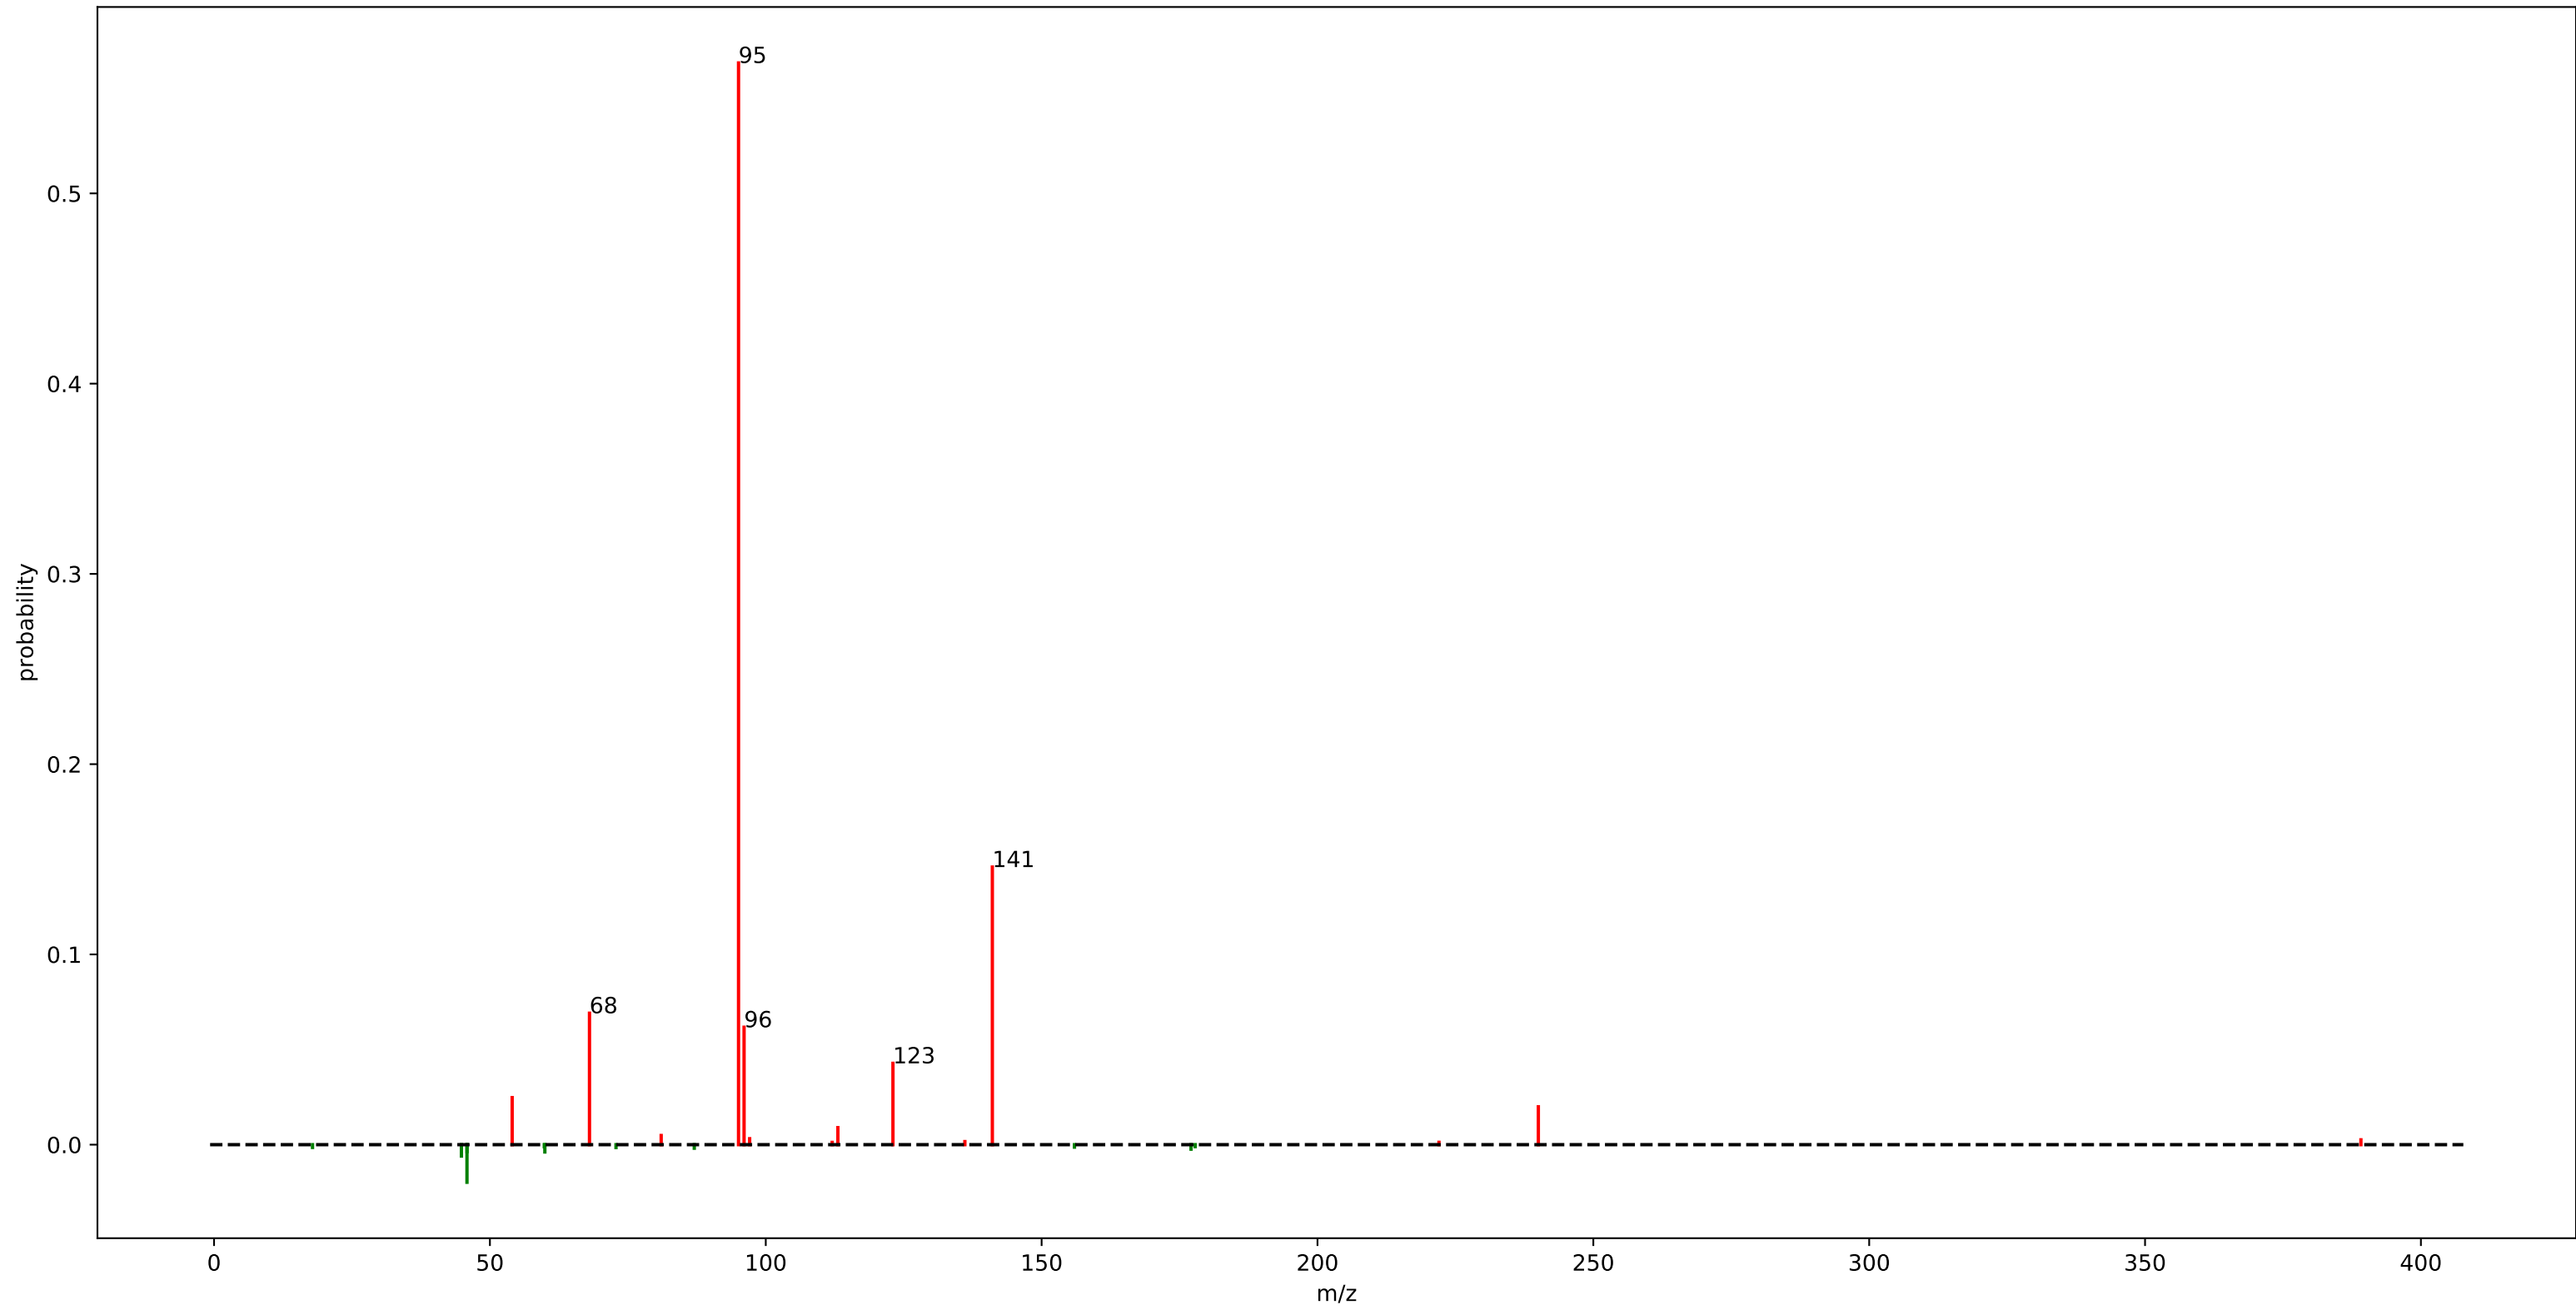

## urine\_mass2motif\_38.m2m

|                   |        |
|-------------------|--------|
| fragment_95.0625  | : 0.57 |
| fragment_141.0675 | : 0.15 |
| fragment_68.0475  | : 0.07 |
| fragment_96.0675  | : 0.06 |
| fragment_123.0525 | : 0.04 |
| fragment_54.0325  | : 0.02 |
| fragment_240.0325 | : 0.02 |
| loss_45.8425      | : 0.02 |
| fragment_113.0725 | : 0.01 |
| loss_44.8375      | : 0.01 |

motif\_440

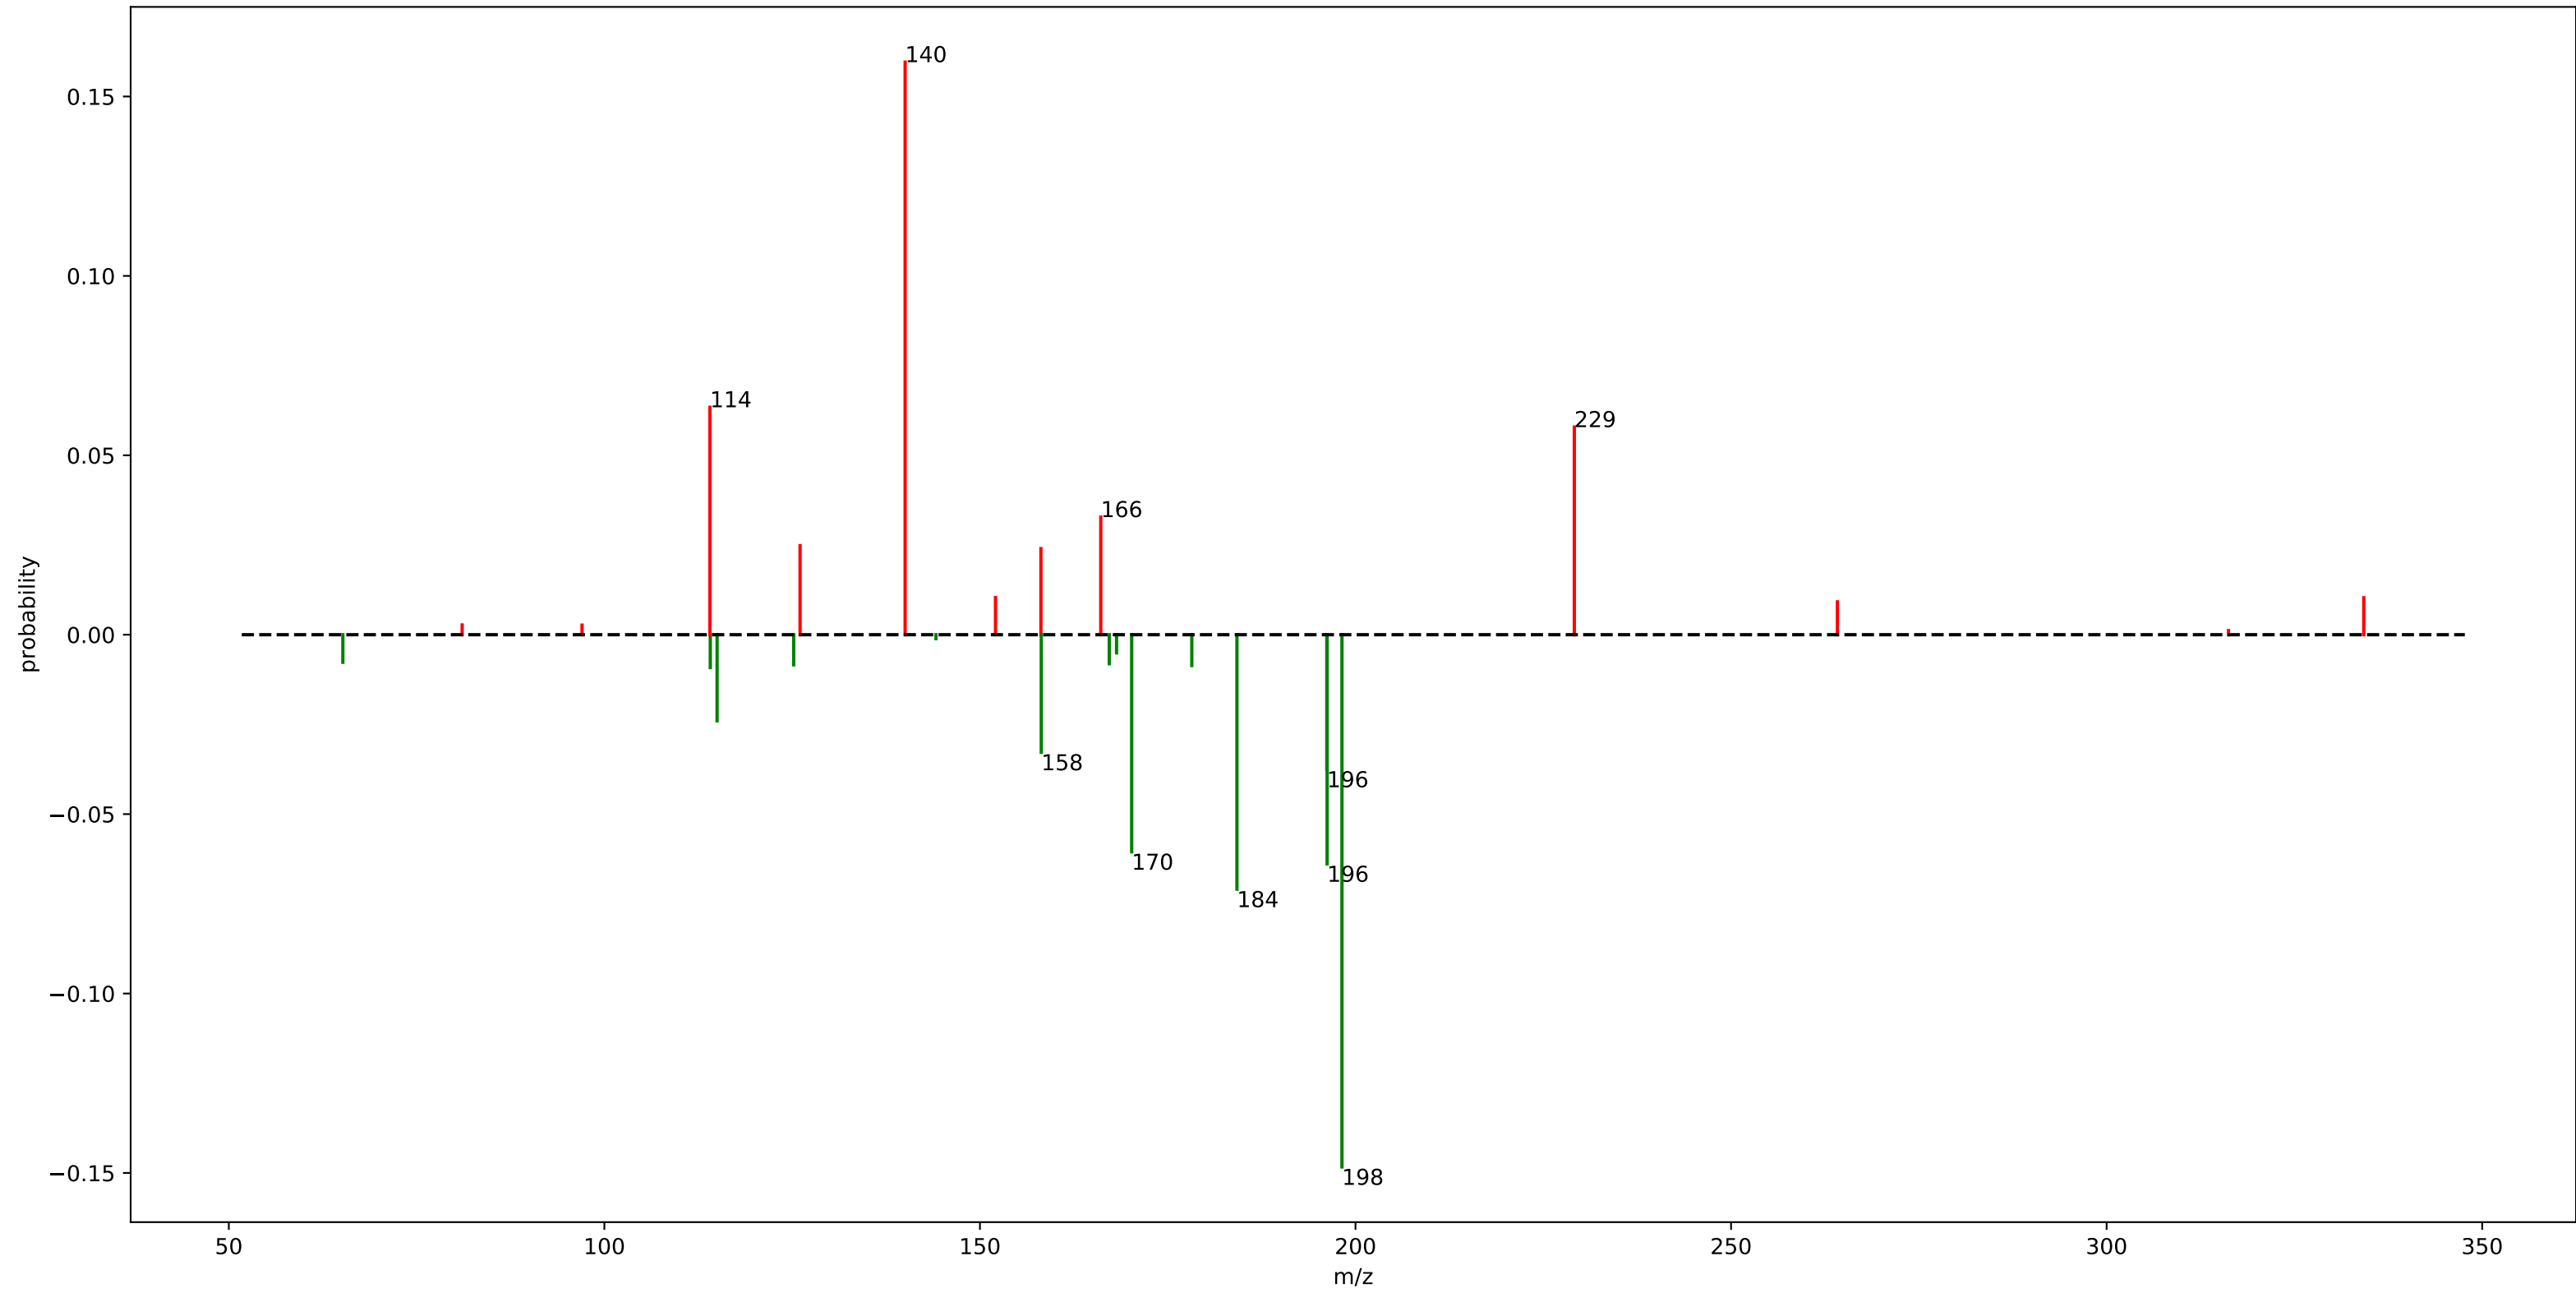

## motif\_440

|                   |        |               |        |
|-------------------|--------|---------------|--------|
| fragment_140.0425 | : 0.16 | loss_65.1825  | : 0.01 |
| loss_198.1975     | : 0.15 | loss_168.1875 | : 0.01 |
| loss_184.2175     | : 0.07 |               |        |
| loss_196.2175     | : 0.06 |               |        |
| fragment_114.0525 | : 0.06 |               |        |
| loss_170.2025     | : 0.06 |               |        |
| fragment_229.1325 | : 0.06 |               |        |
| loss_196.1825     | : 0.04 |               |        |
| loss_158.1675     | : 0.03 |               |        |
| fragment_166.0875 | : 0.03 |               |        |
| fragment_126.0525 | : 0.02 |               |        |
| fragment_158.1175 | : 0.02 |               |        |
| loss_115.0075     | : 0.02 |               |        |
| fragment_152.0725 | : 0.01 |               |        |
| fragment_334.2375 | : 0.01 |               |        |
| fragment_264.1575 | : 0.01 |               |        |
| loss_114.1025     | : 0.01 |               |        |
| loss_178.2075     | : 0.01 |               |        |
| loss_125.2075     | : 0.01 |               |        |
| loss_167.2175     | : 0.01 |               |        |

rhabdus\_motif\_15.m2m

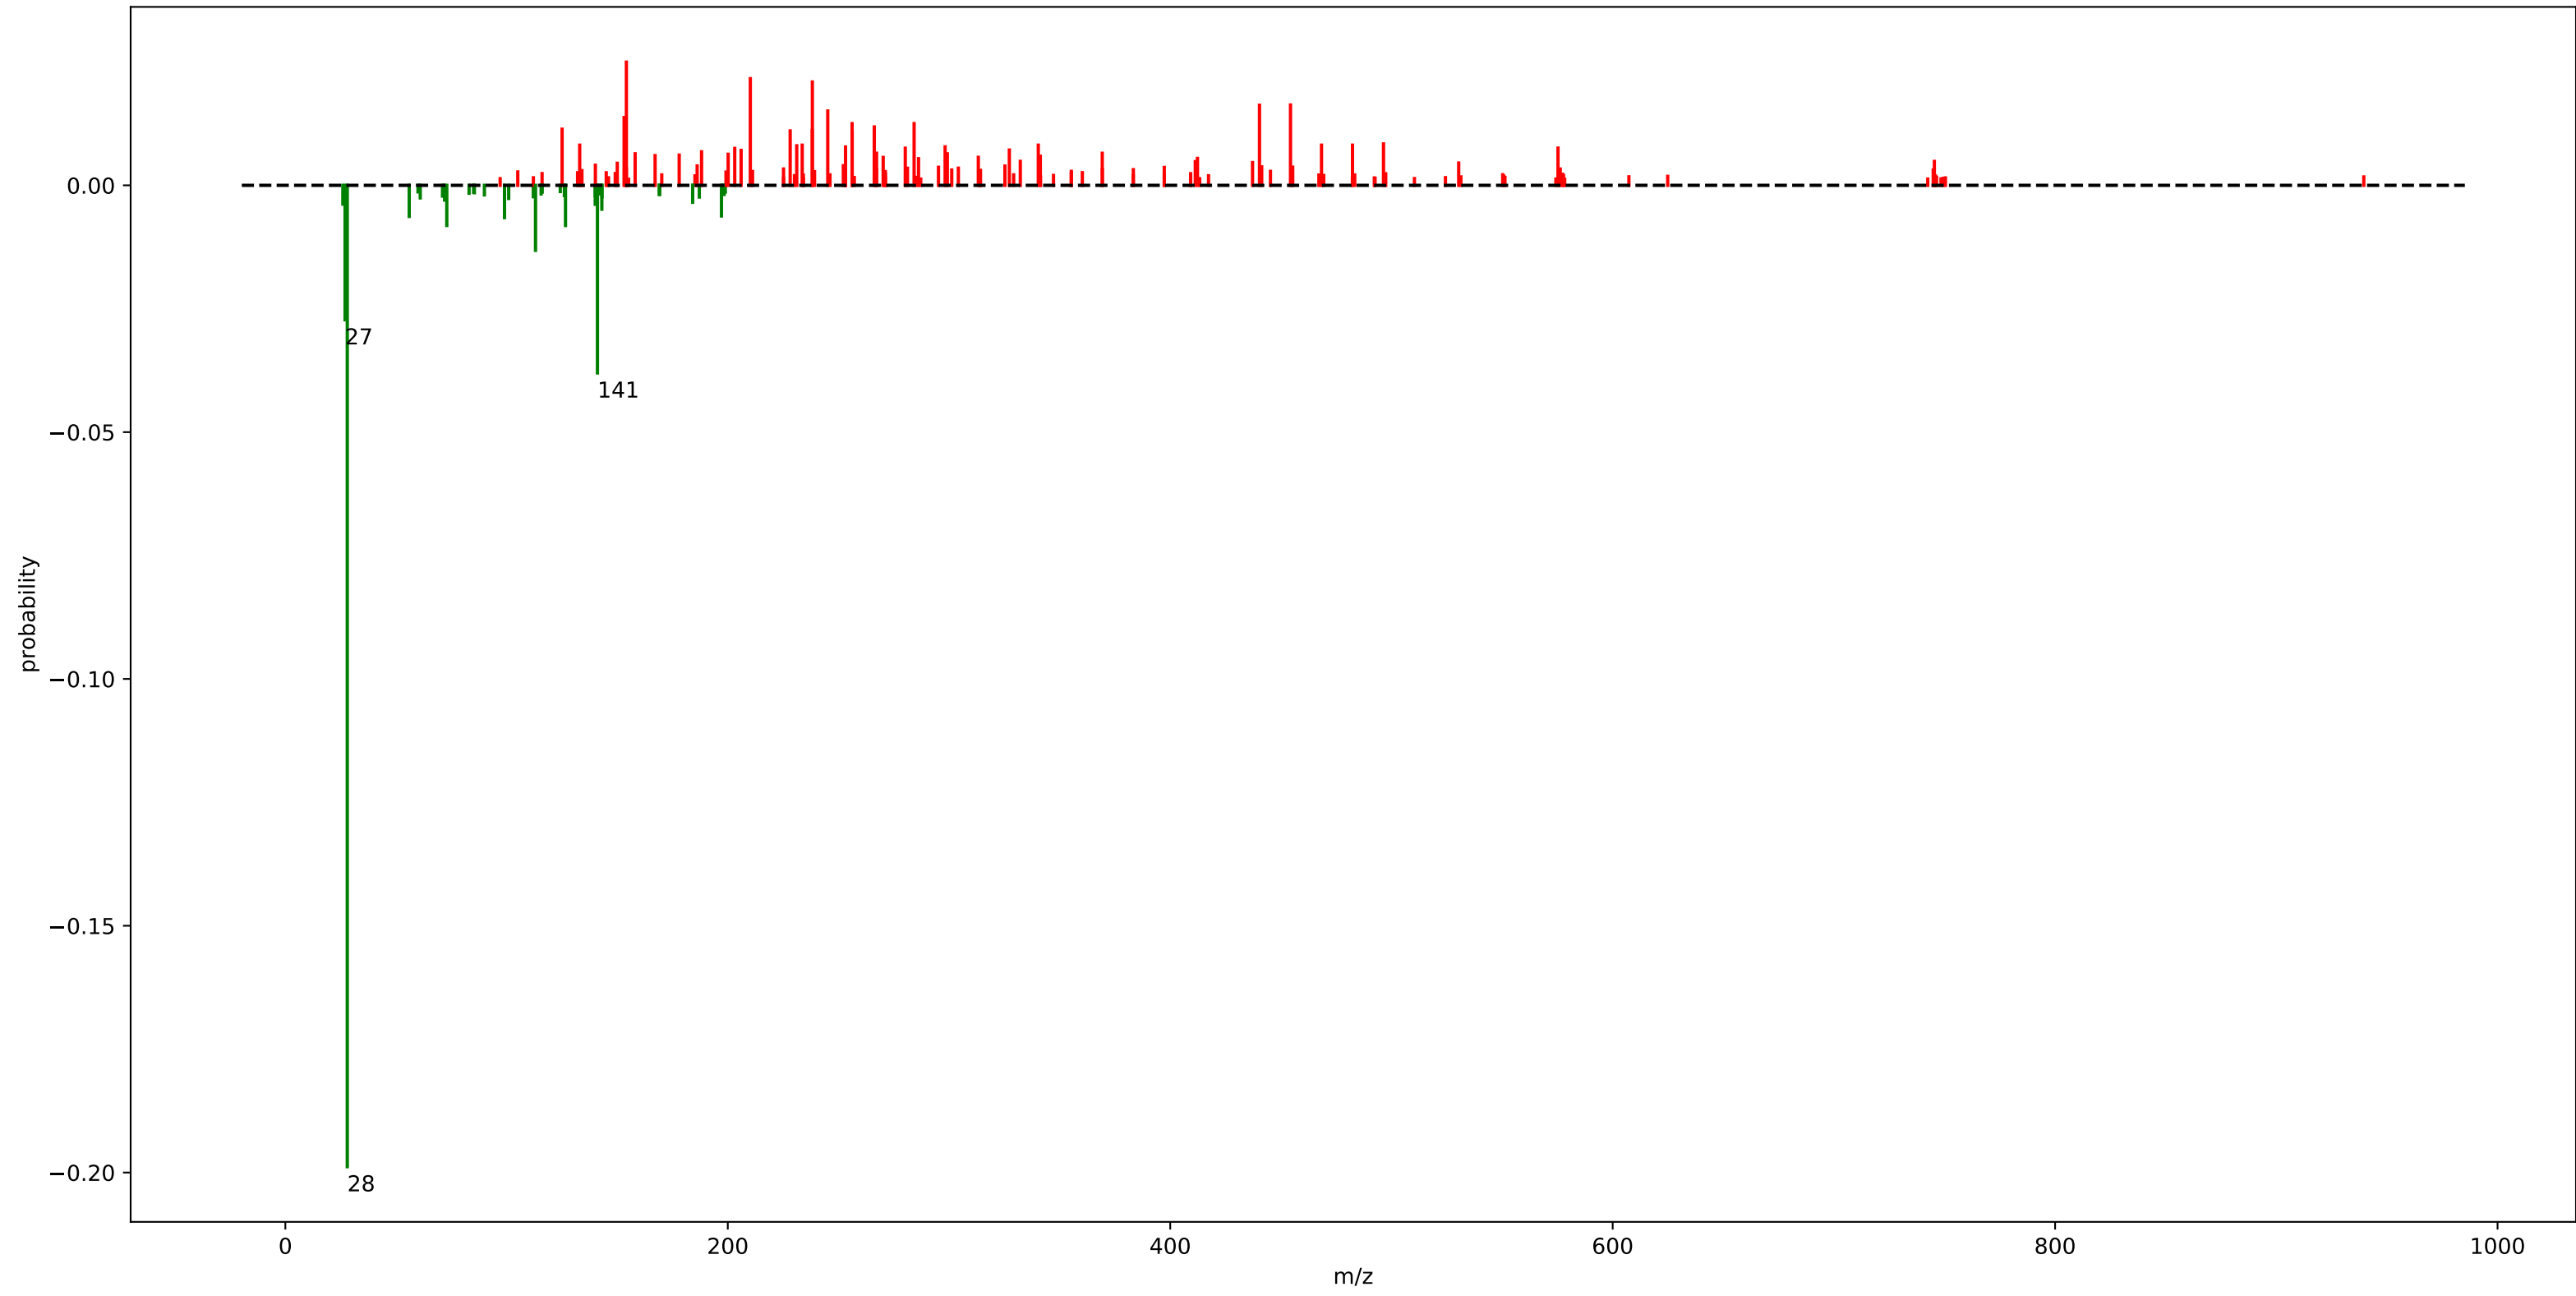

# rhabdus\_motif\_15.m2m

|                   |        |                   |        |                   |        |
|-------------------|--------|-------------------|--------|-------------------|--------|
| loss_27.9925      | : 0.20 | fragment_482.3925 | : 0.01 | loss_55.9925      | : 0.01 |
| loss_141.0775     | : 0.04 | fragment_133.0525 | : 0.01 | fragment_200.1625 | : 0.01 |
| loss_26.9925      | : 0.03 | loss_72.9775      | : 0.01 | loss_197.1425     | : 0.01 |
| fragment_154.1575 | : 0.02 | fragment_340.3575 | : 0.01 | fragment_178.0325 | : 0.01 |
| fragment_210.1825 | : 0.02 | loss_126.6375     | : 0.01 | fragment_167.1425 | : 0.01 |
| fragment_238.2175 | : 0.02 | fragment_233.6375 | : 0.01 | fragment_341.2775 | : 0.01 |
| fragment_454.3625 | : 0.02 | fragment_231.1675 | : 0.01 | fragment_313.2475 | : 0.01 |
| fragment_440.3475 | : 0.02 | fragment_298.2375 | : 0.01 | fragment_270.2425 | : 0.01 |
| fragment_245.1875 | : 0.02 | fragment_253.2275 | : 0.01 | fragment_412.3175 | : 0.01 |
| fragment_153.1275 | : 0.01 | fragment_575.2825 | : 0.01 | fragment_286.2175 | : 0.01 |
| loss_113.0825     | : 0.01 | fragment_280.2275 | : 0.01 |                   |        |
| fragment_284.2225 | : 0.01 | fragment_203.1375 | : 0.01 |                   |        |
| fragment_256.1925 | : 0.01 | fragment_327.2625 | : 0.01 |                   |        |
| fragment_266.2125 | : 0.01 | fragment_206.0275 | : 0.01 |                   |        |
| fragment_125.0975 | : 0.01 | fragment_188.1425 | : 0.01 |                   |        |
| fragment_238.1775 | : 0.01 | loss_99.0675      | : 0.01 |                   |        |
| fragment_228.1975 | : 0.01 | fragment_267.2425 | : 0.01 |                   |        |
| fragment_256.2275 | : 0.01 | fragment_369.2725 | : 0.01 |                   |        |
| fragment_496.4125 | : 0.01 | fragment_158.1175 | : 0.01 |                   |        |
| fragment_468.3775 | : 0.01 | fragment_299.2325 | : 0.01 |                   |        |



motif\_442

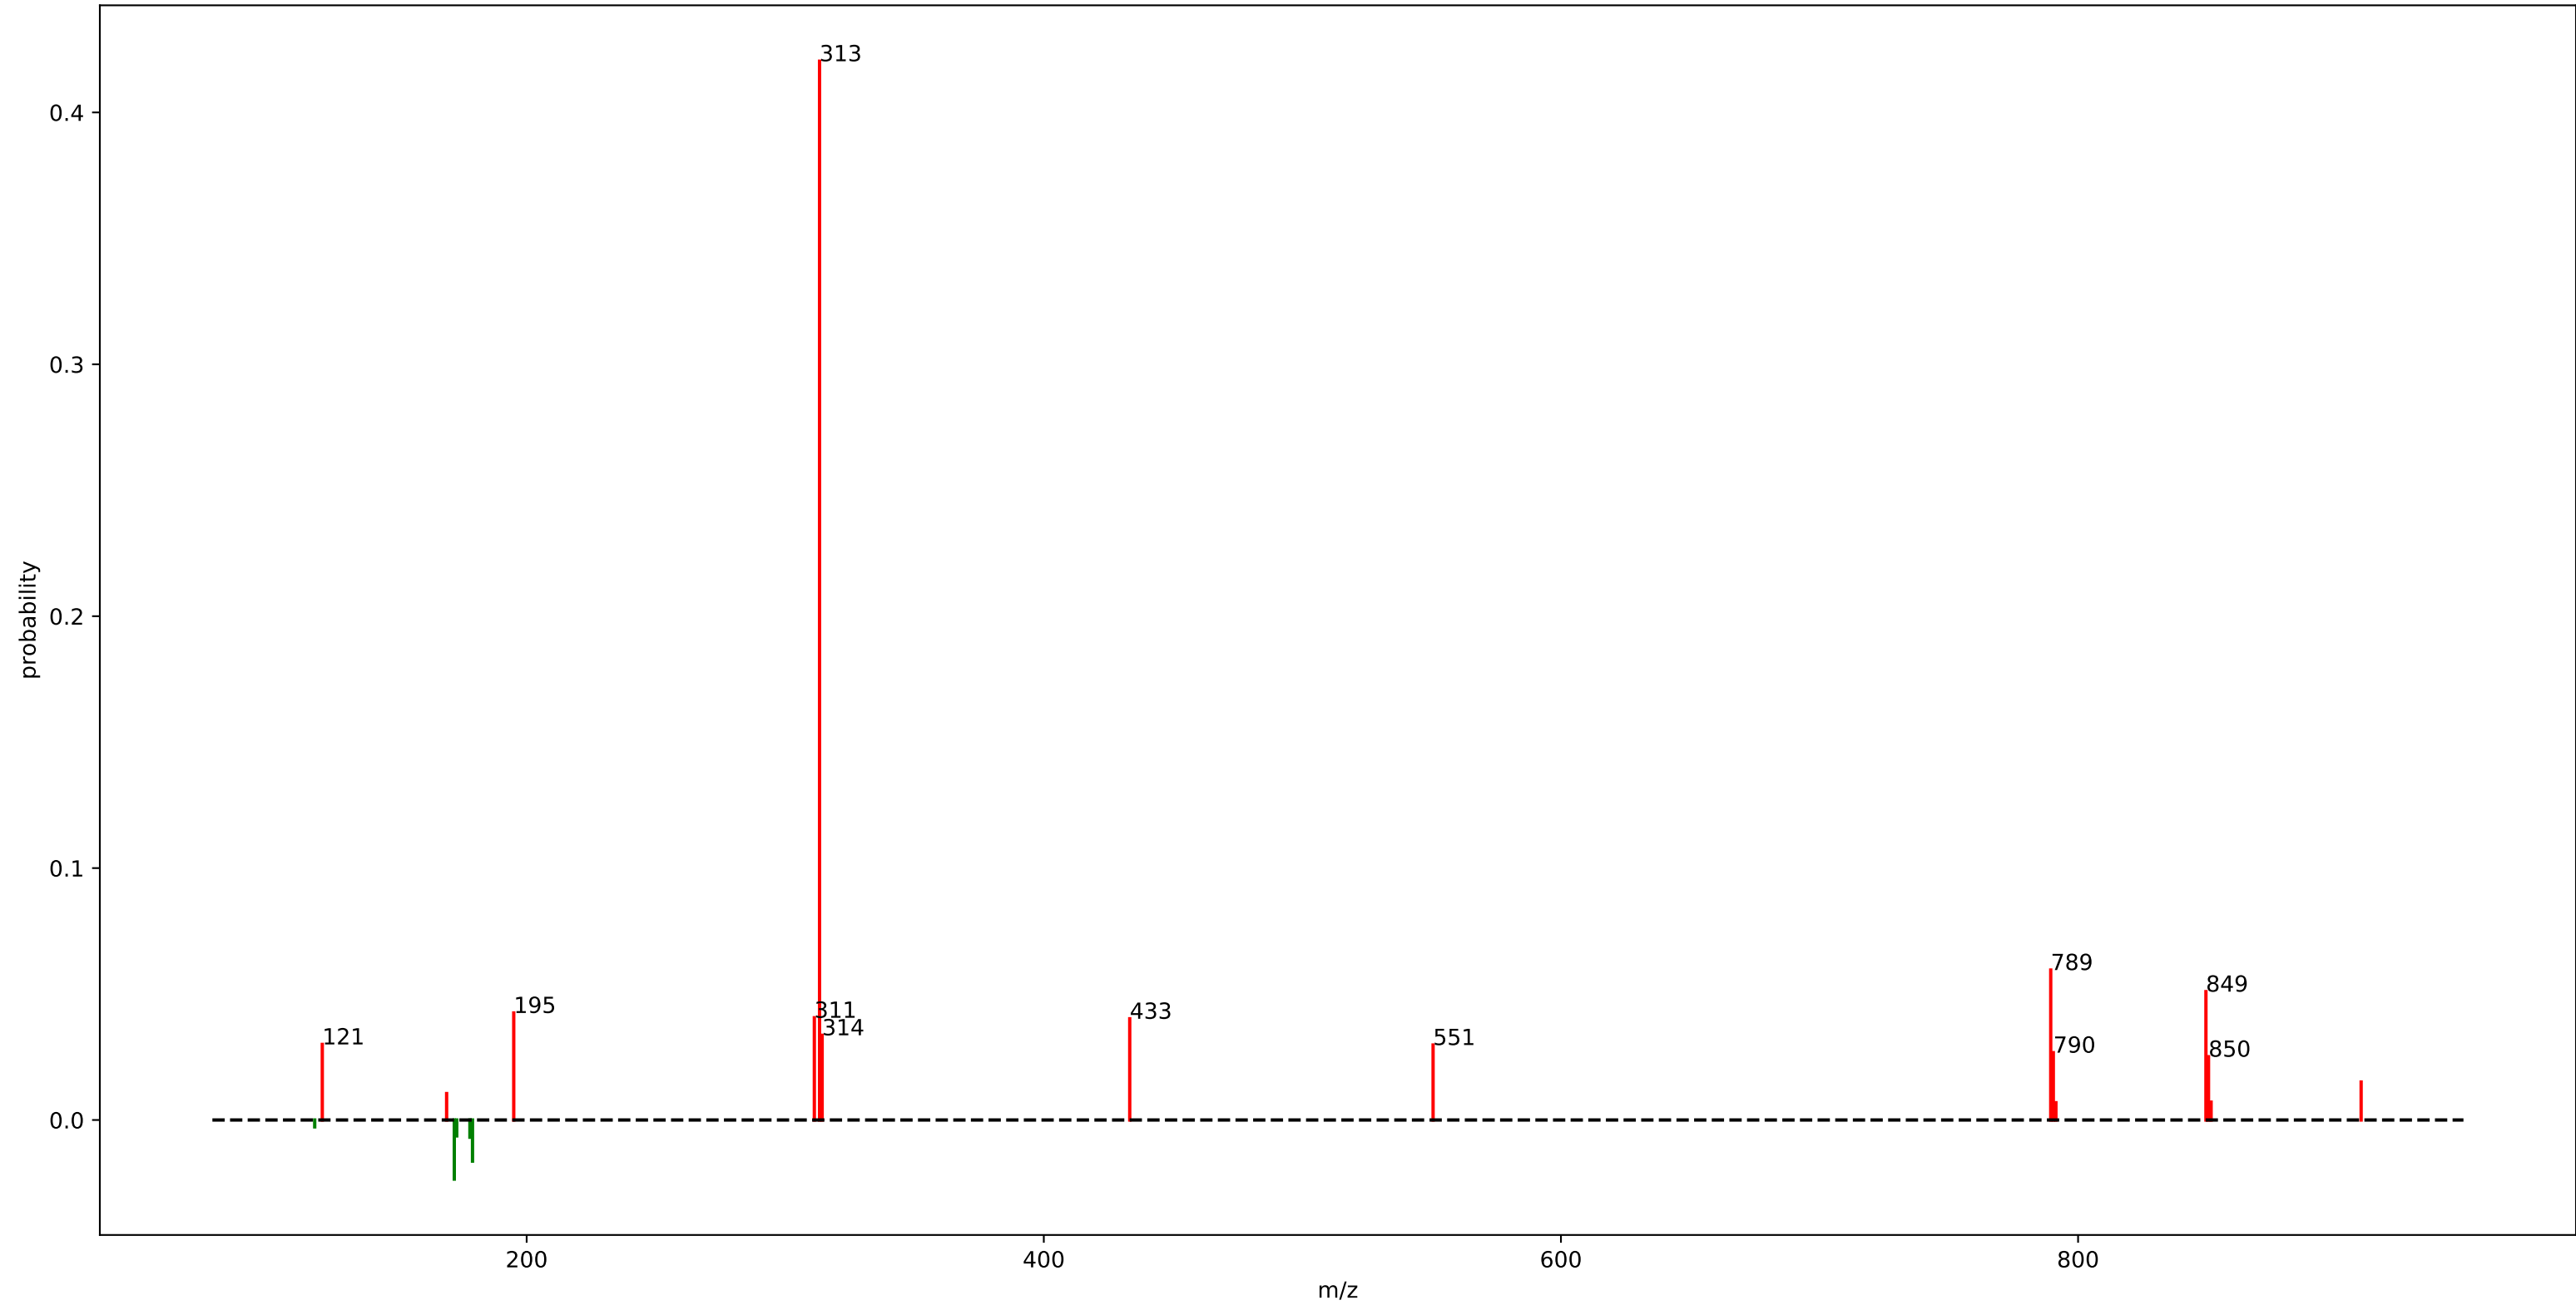

## motif\_442

|                   |        |
|-------------------|--------|
| fragment_313.2725 | : 0.42 |
| fragment_789.4175 | : 0.06 |
| fragment_849.4425 | : 0.05 |
| fragment_195.0025 | : 0.04 |
| fragment_311.2575 | : 0.04 |
| fragment_433.2325 | : 0.04 |
| fragment_314.2775 | : 0.03 |
| fragment_120.9625 | : 0.03 |
| fragment_550.5525 | : 0.03 |
| fragment_790.4225 | : 0.03 |
| fragment_850.4425 | : 0.03 |
| loss_172.0125     | : 0.02 |
| loss_179.0575     | : 0.02 |
| fragment_909.4625 | : 0.02 |
| fragment_169.0475 | : 0.01 |
| fragment_851.4475 | : 0.01 |
| fragment_791.4275 | : 0.01 |
| loss_178.0525     | : 0.01 |
| loss_172.9575     | : 0.01 |

rhamn\_motif\_130.m2m

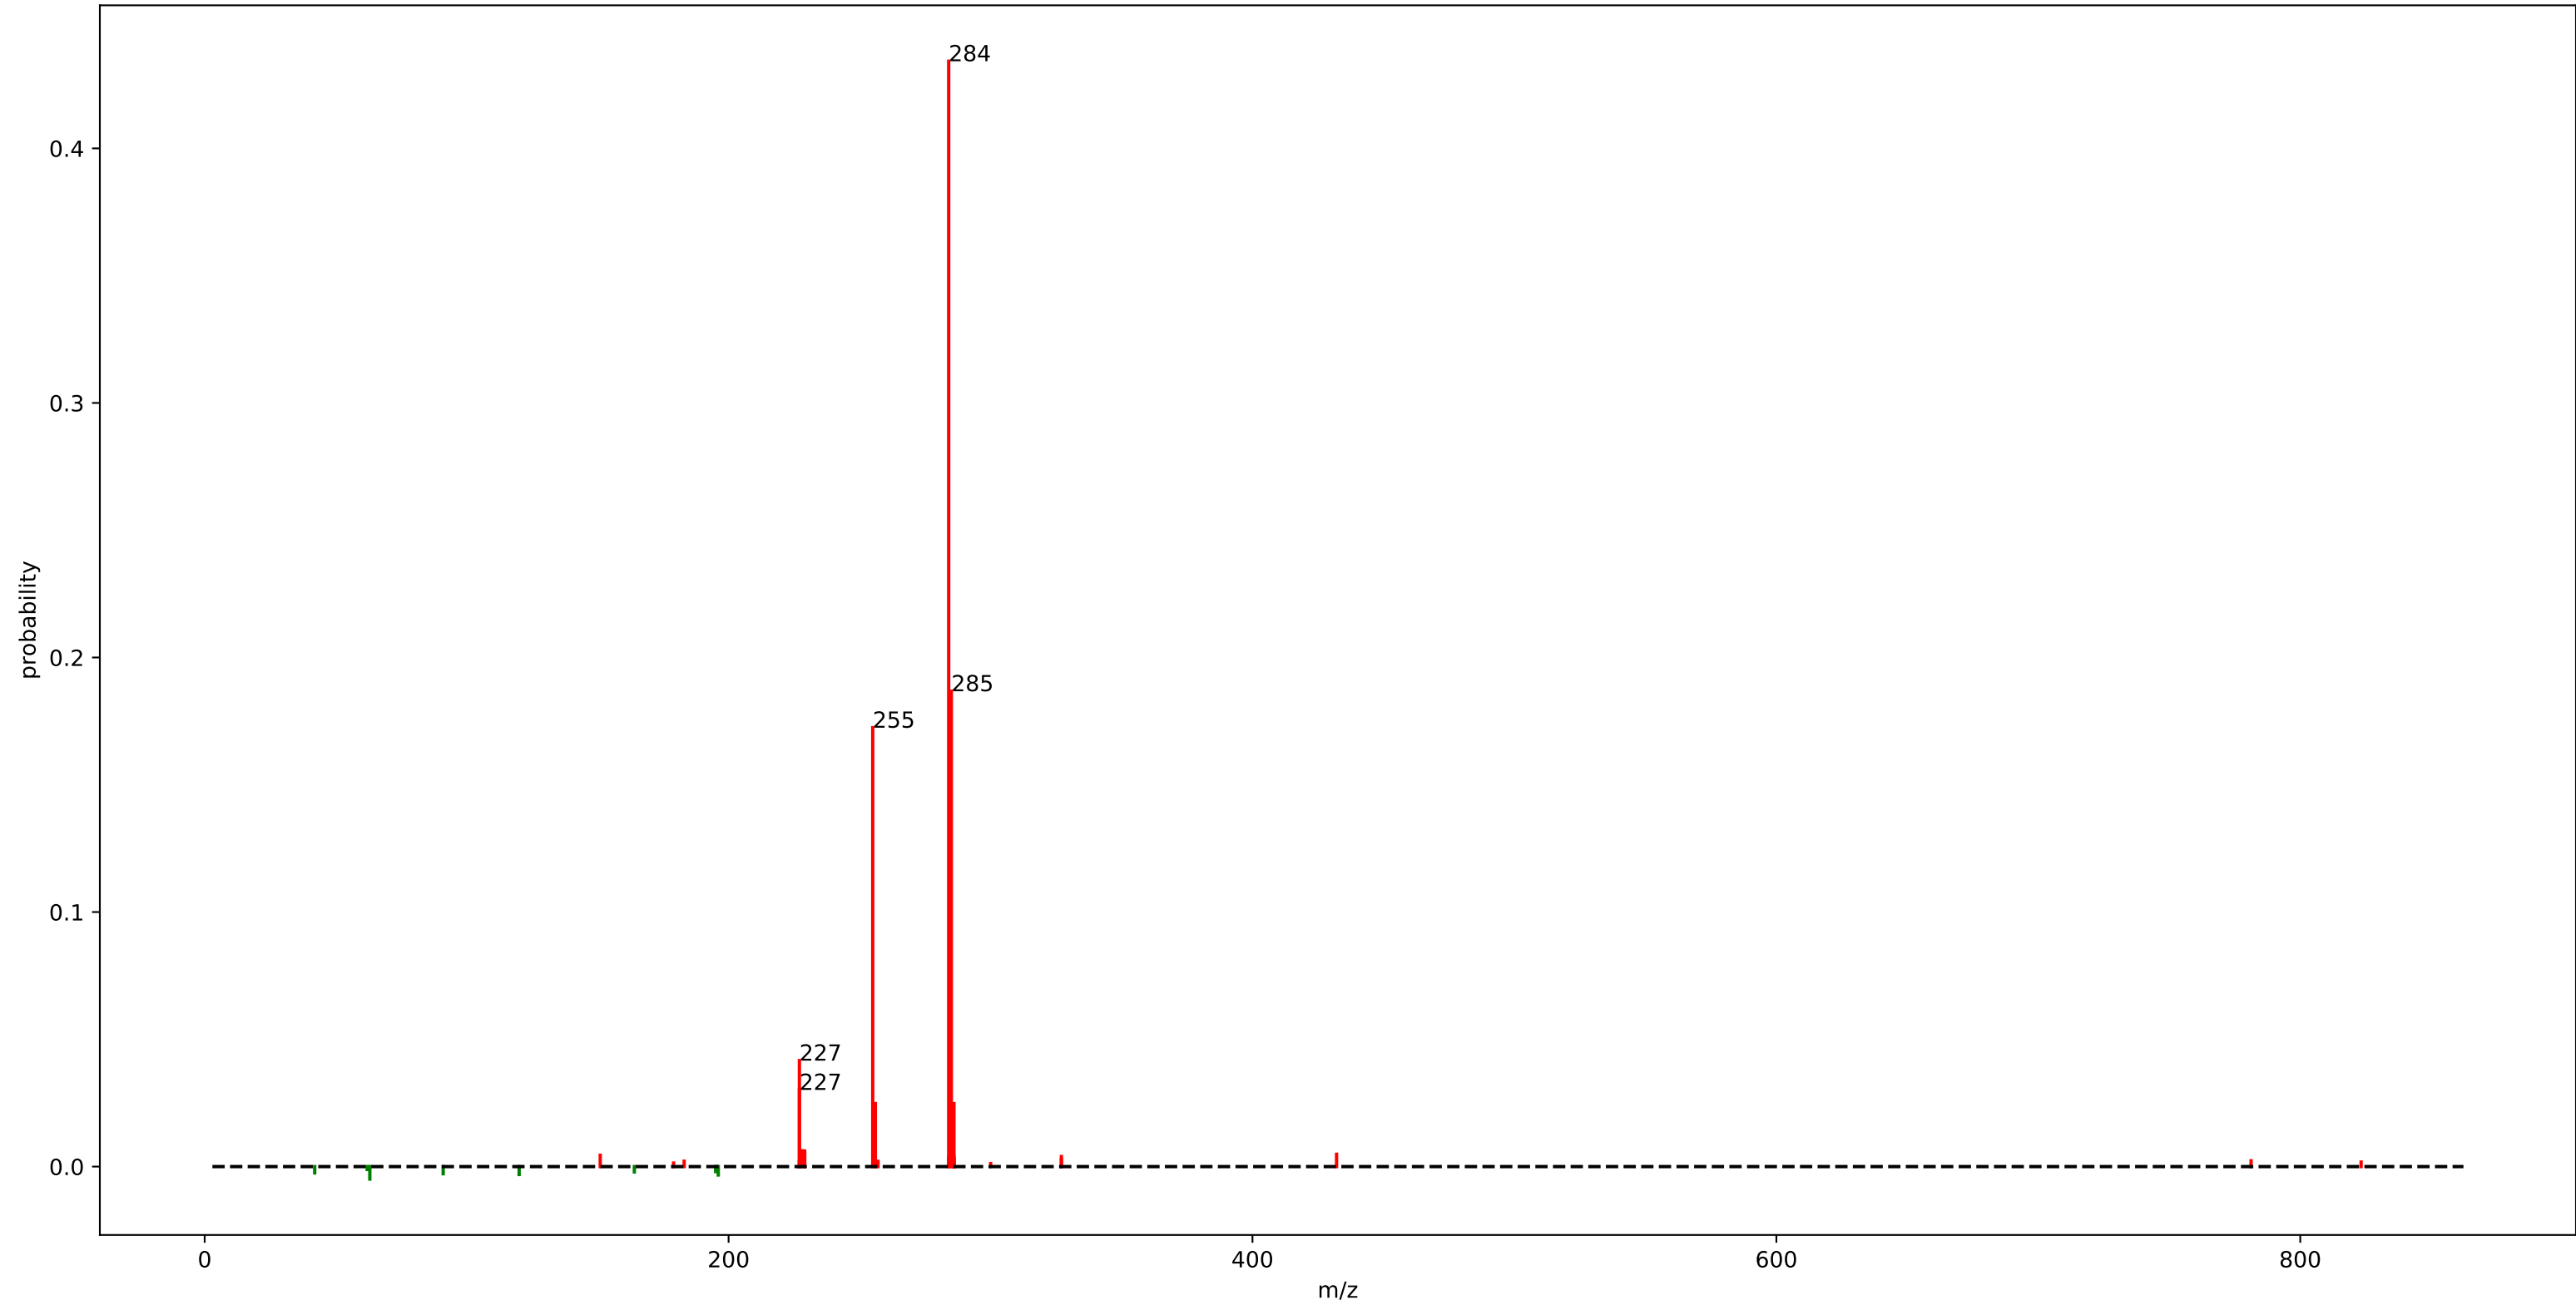

## rhamn\_motif\_130.m2m

|                   |        |
|-------------------|--------|
| fragment_284.0325 | : 0.43 |
| fragment_285.0375 | : 0.19 |
| fragment_255.0275 | : 0.17 |
| fragment_227.0325 | : 0.04 |
| fragment_227.0375 | : 0.03 |
| fragment_256.0325 | : 0.02 |
| fragment_286.0425 | : 0.02 |
| fragment_228.0375 | : 0.01 |
| fragment_229.0475 | : 0.01 |

motif\_523

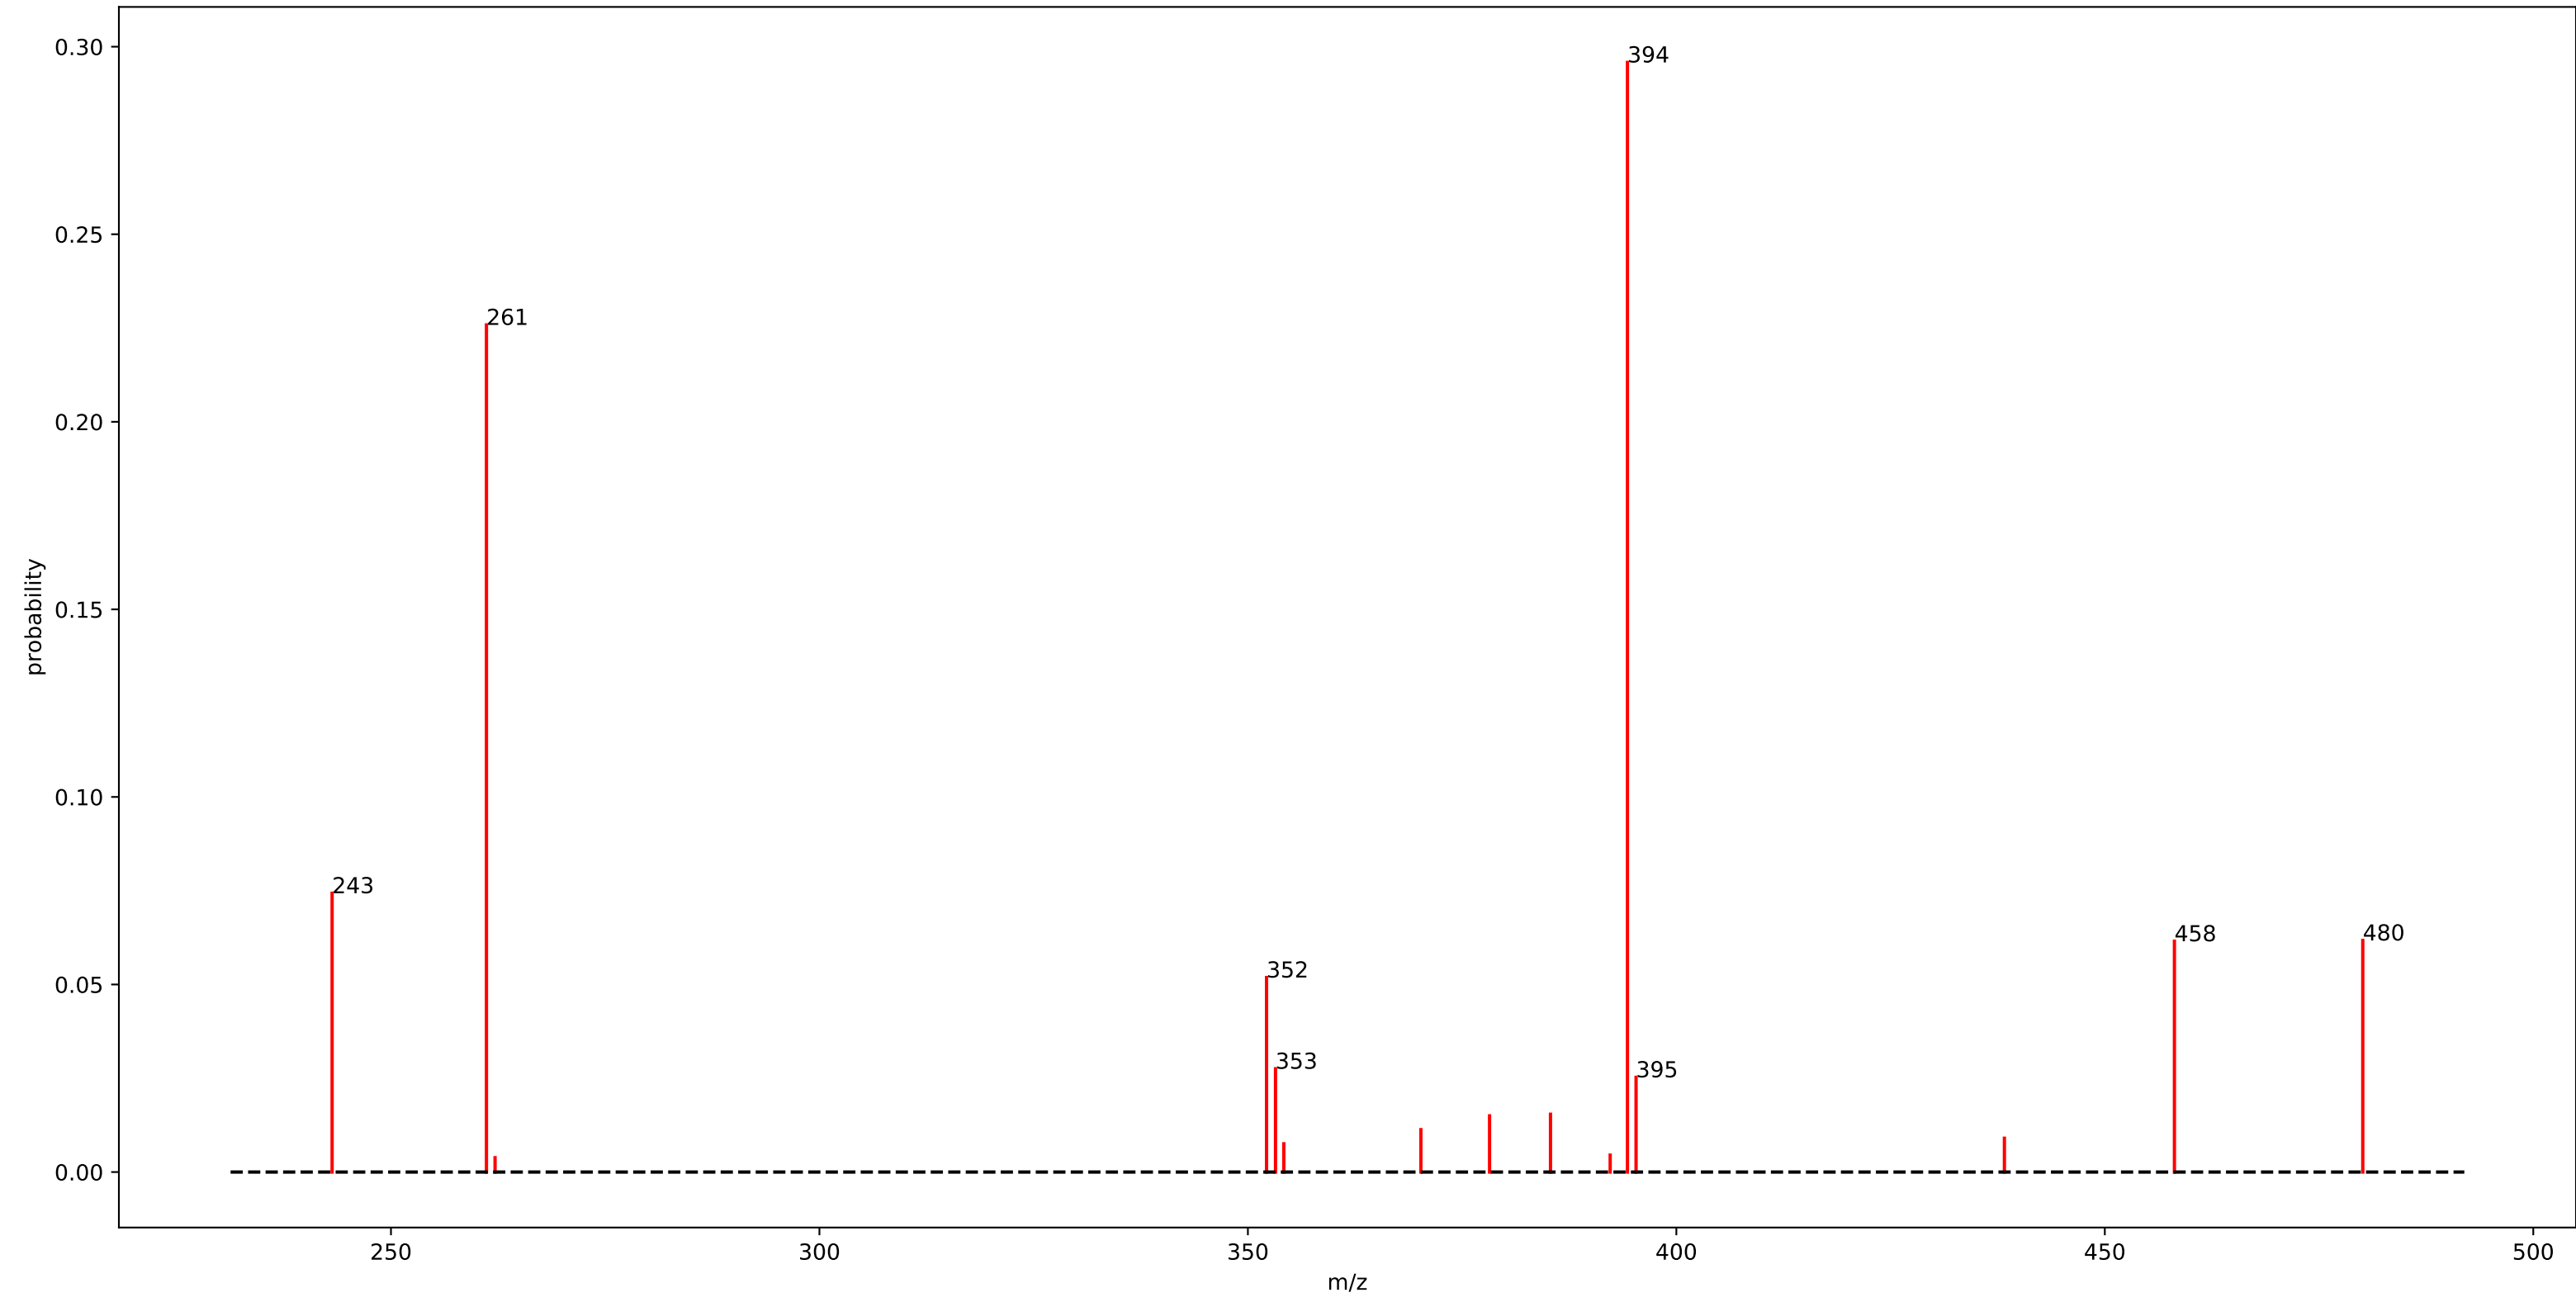

## motif\_523

|                   |        |
|-------------------|--------|
| fragment_394.2925 | : 0.30 |
| fragment_261.1425 | : 0.23 |
| fragment_243.1325 | : 0.07 |
| fragment_480.1025 | : 0.06 |
| fragment_458.1225 | : 0.06 |
| fragment_352.1775 | : 0.05 |
| fragment_353.2225 | : 0.03 |
| fragment_395.2975 | : 0.03 |
| fragment_385.3125 | : 0.02 |
| fragment_378.2025 | : 0.01 |
| fragment_370.1875 | : 0.01 |
| fragment_438.2825 | : 0.01 |
| fragment_354.1925 | : 0.01 |

motif\_520

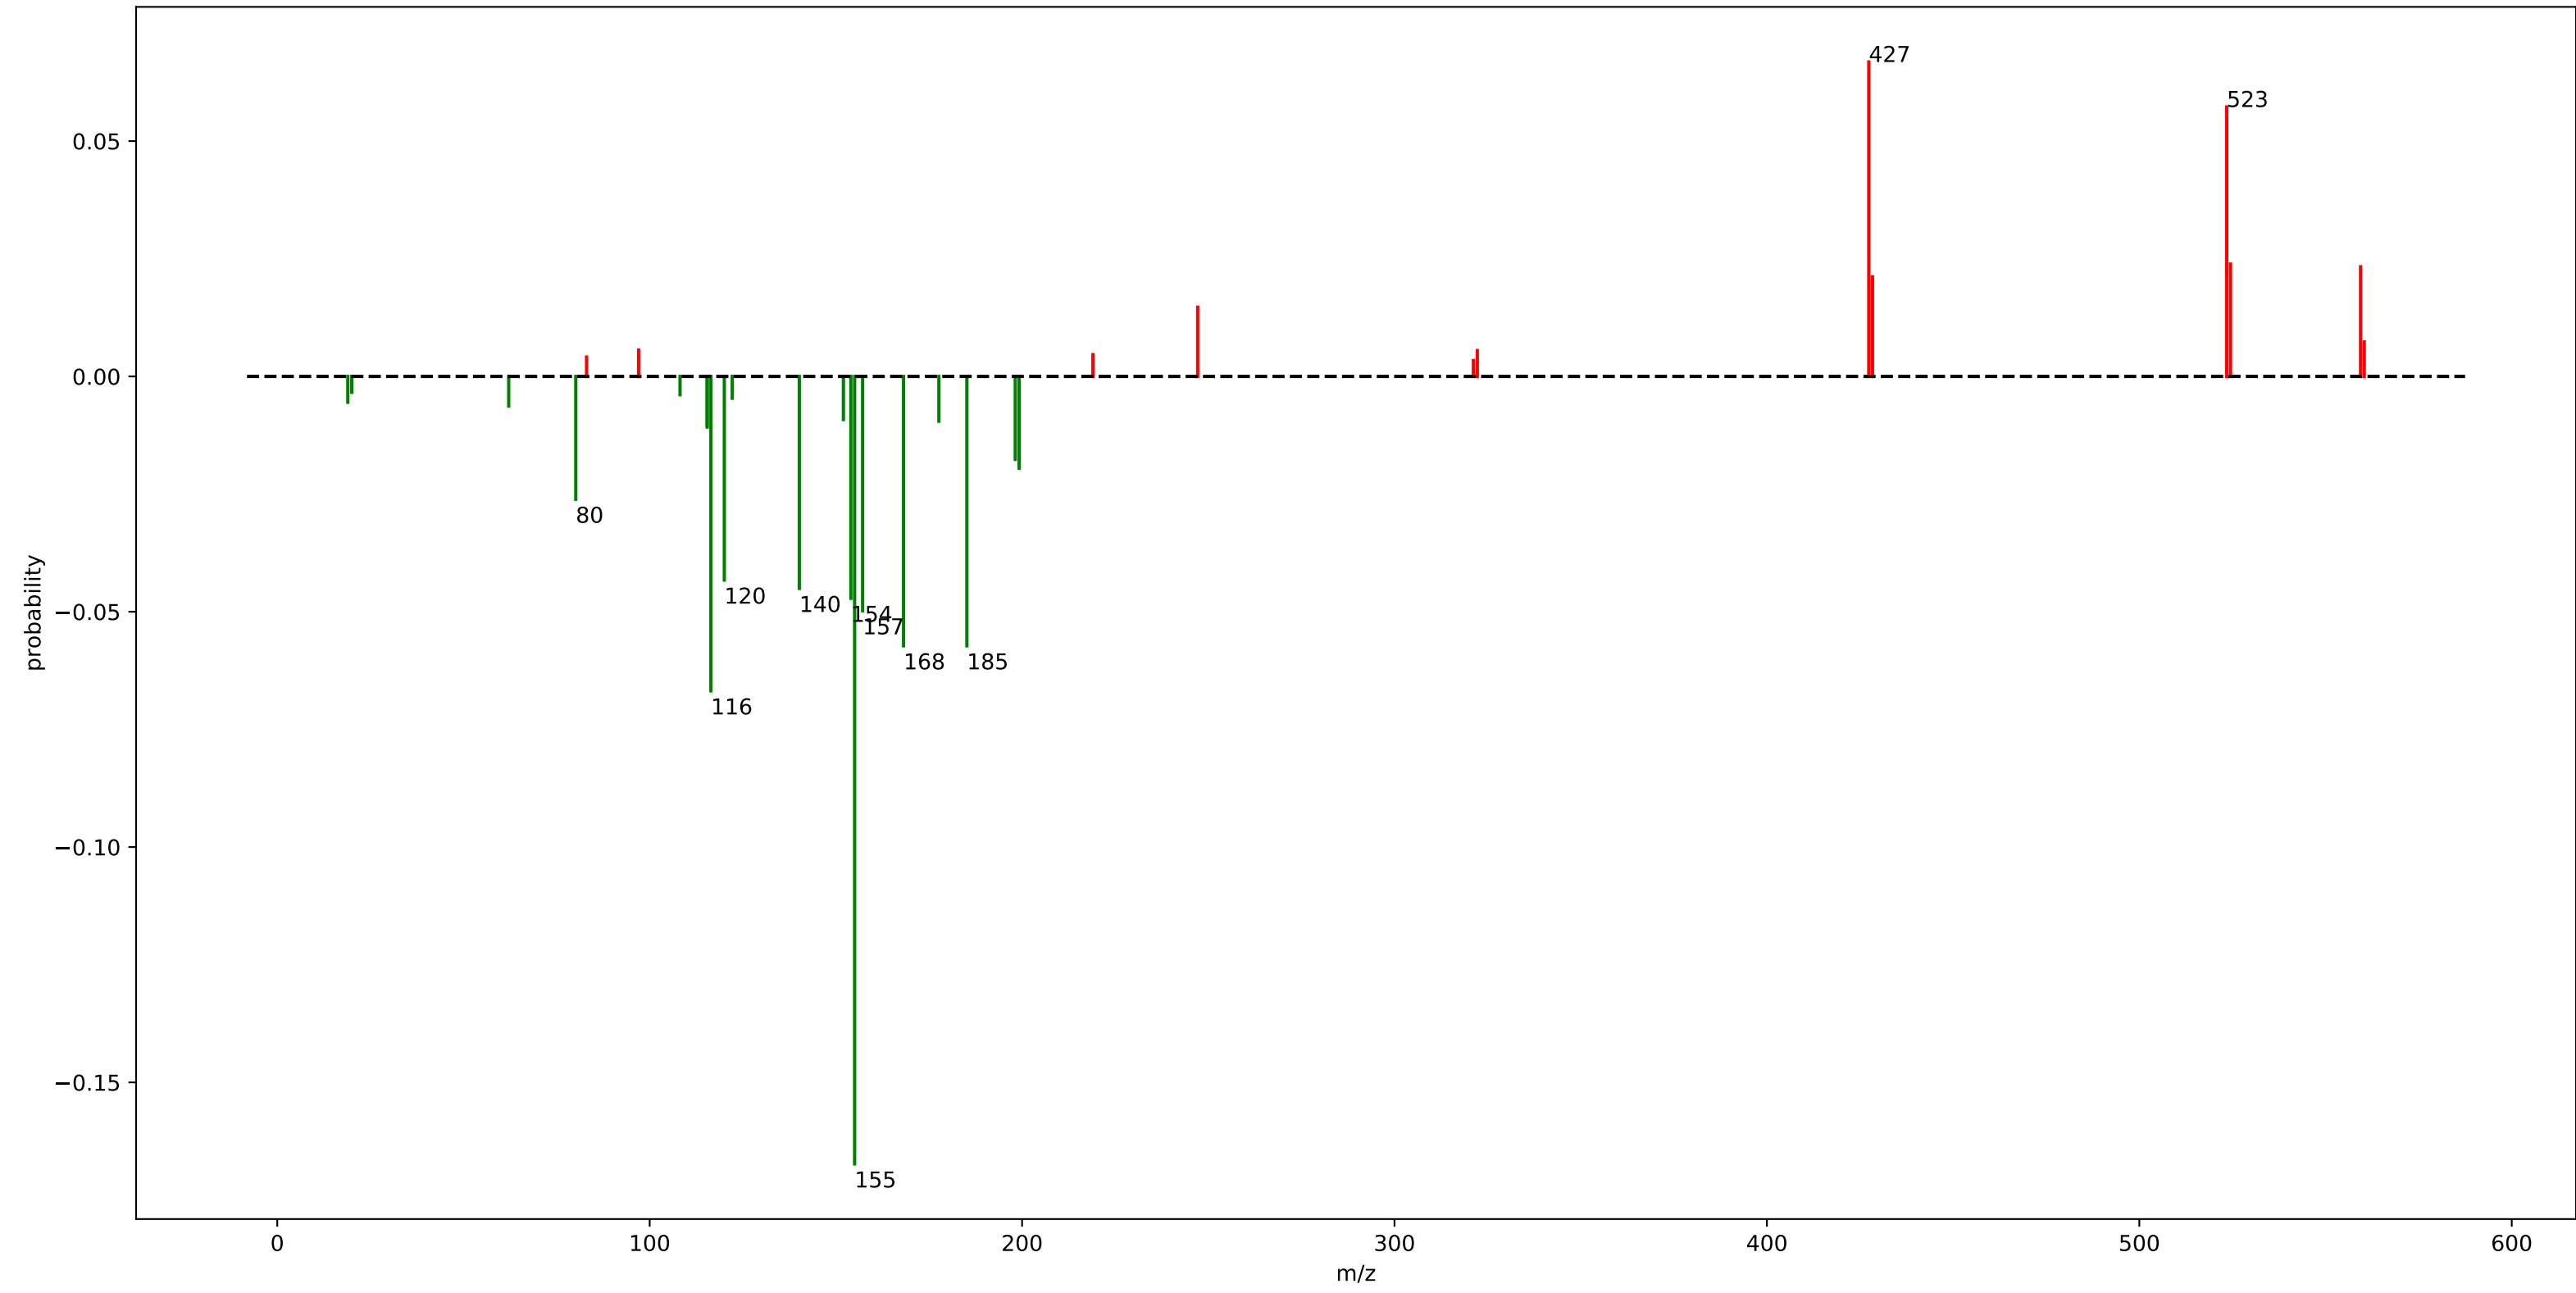

## motif\_520

|                   |        |                   |        |
|-------------------|--------|-------------------|--------|
| loss_155.0325     | : 0.17 | loss_152.0225     | : 0.01 |
| loss_116.4375     | : 0.07 | fragment_560.4025 | : 0.01 |
| fragment_427.3575 | : 0.07 | loss_62.1475      | : 0.01 |
| fragment_523.4725 | : 0.06 | fragment_97.0275  | : 0.01 |
| loss_168.1725     | : 0.06 | loss_18.9475      | : 0.01 |
| loss_185.1775     | : 0.06 | fragment_322.2375 | : 0.01 |
| loss_157.1825     | : 0.05 |                   |        |
| loss_154.0275     | : 0.05 |                   |        |
| loss_140.1775     | : 0.05 |                   |        |
| loss_120.0425     | : 0.04 |                   |        |
| loss_80.1575      | : 0.03 |                   |        |
| fragment_524.4775 | : 0.02 |                   |        |
| fragment_559.4025 | : 0.02 |                   |        |
| fragment_428.3575 | : 0.02 |                   |        |
| loss_199.1925     | : 0.02 |                   |        |
| loss_198.1675     | : 0.02 |                   |        |
| fragment_247.1525 | : 0.01 |                   |        |
| loss_115.4375     | : 0.01 |                   |        |
| loss_115.4325     | : 0.01 |                   |        |
| loss_177.6575     | : 0.01 |                   |        |



motif\_521

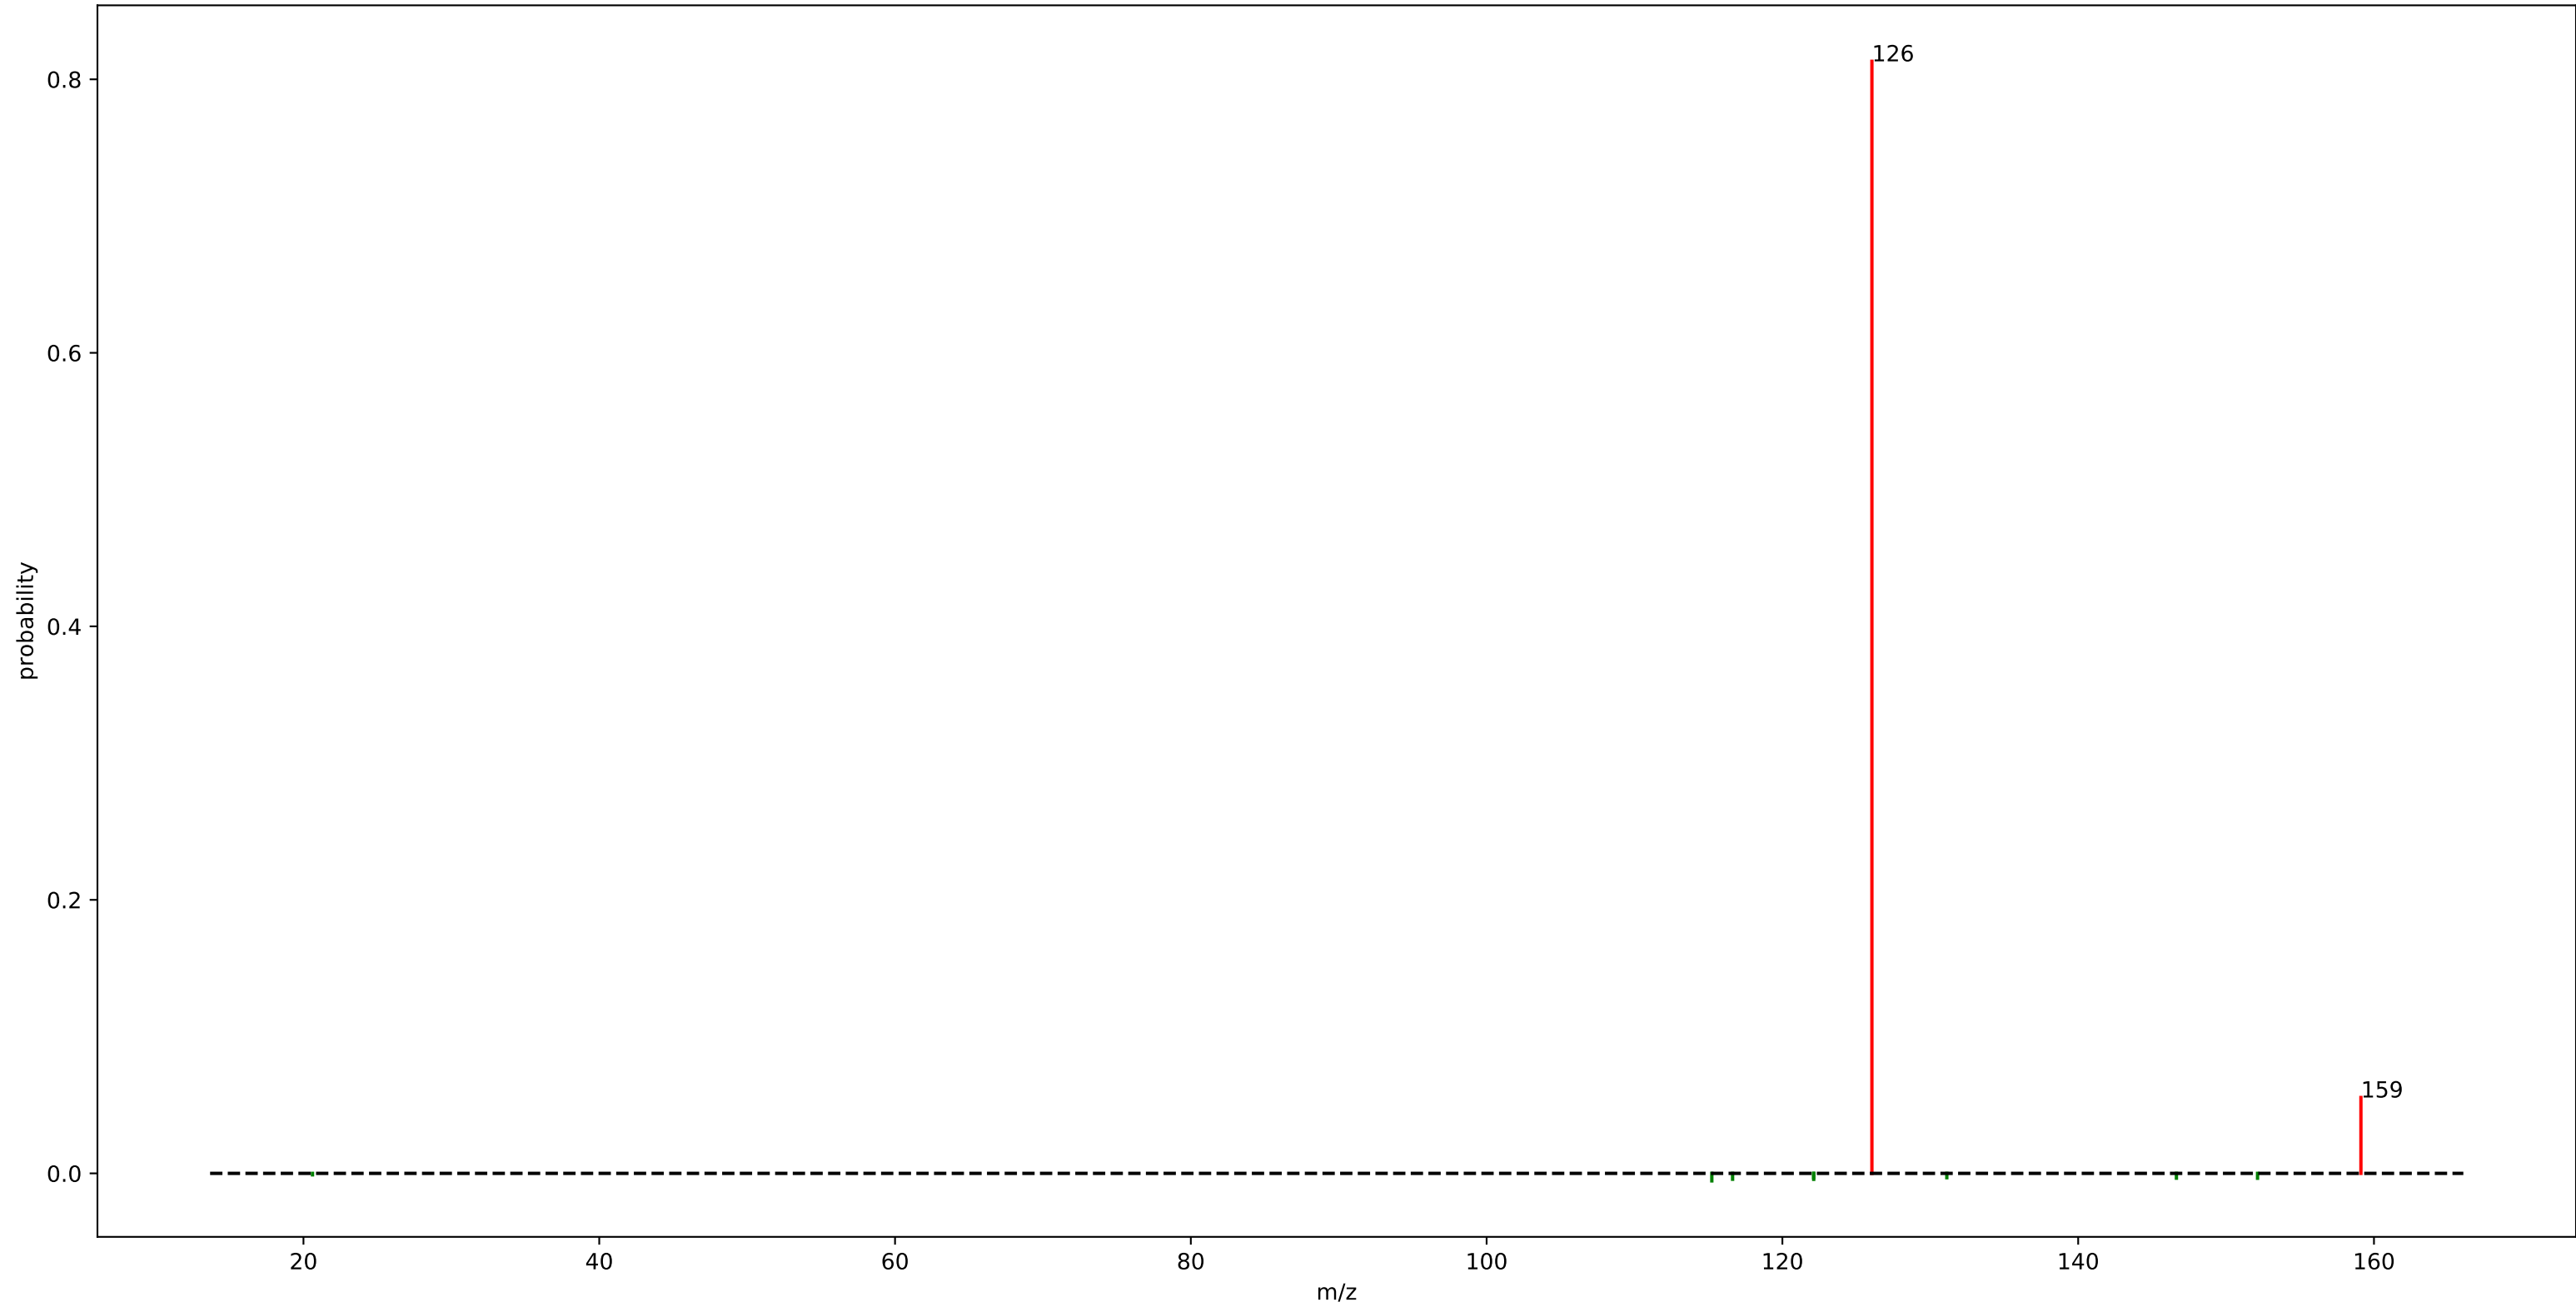

## motif\_521

|                   |        |
|-------------------|--------|
| fragment_126.0525 | : 0.81 |
| fragment_159.1175 | : 0.06 |
| loss_115.2275     | : 0.01 |

motif\_449

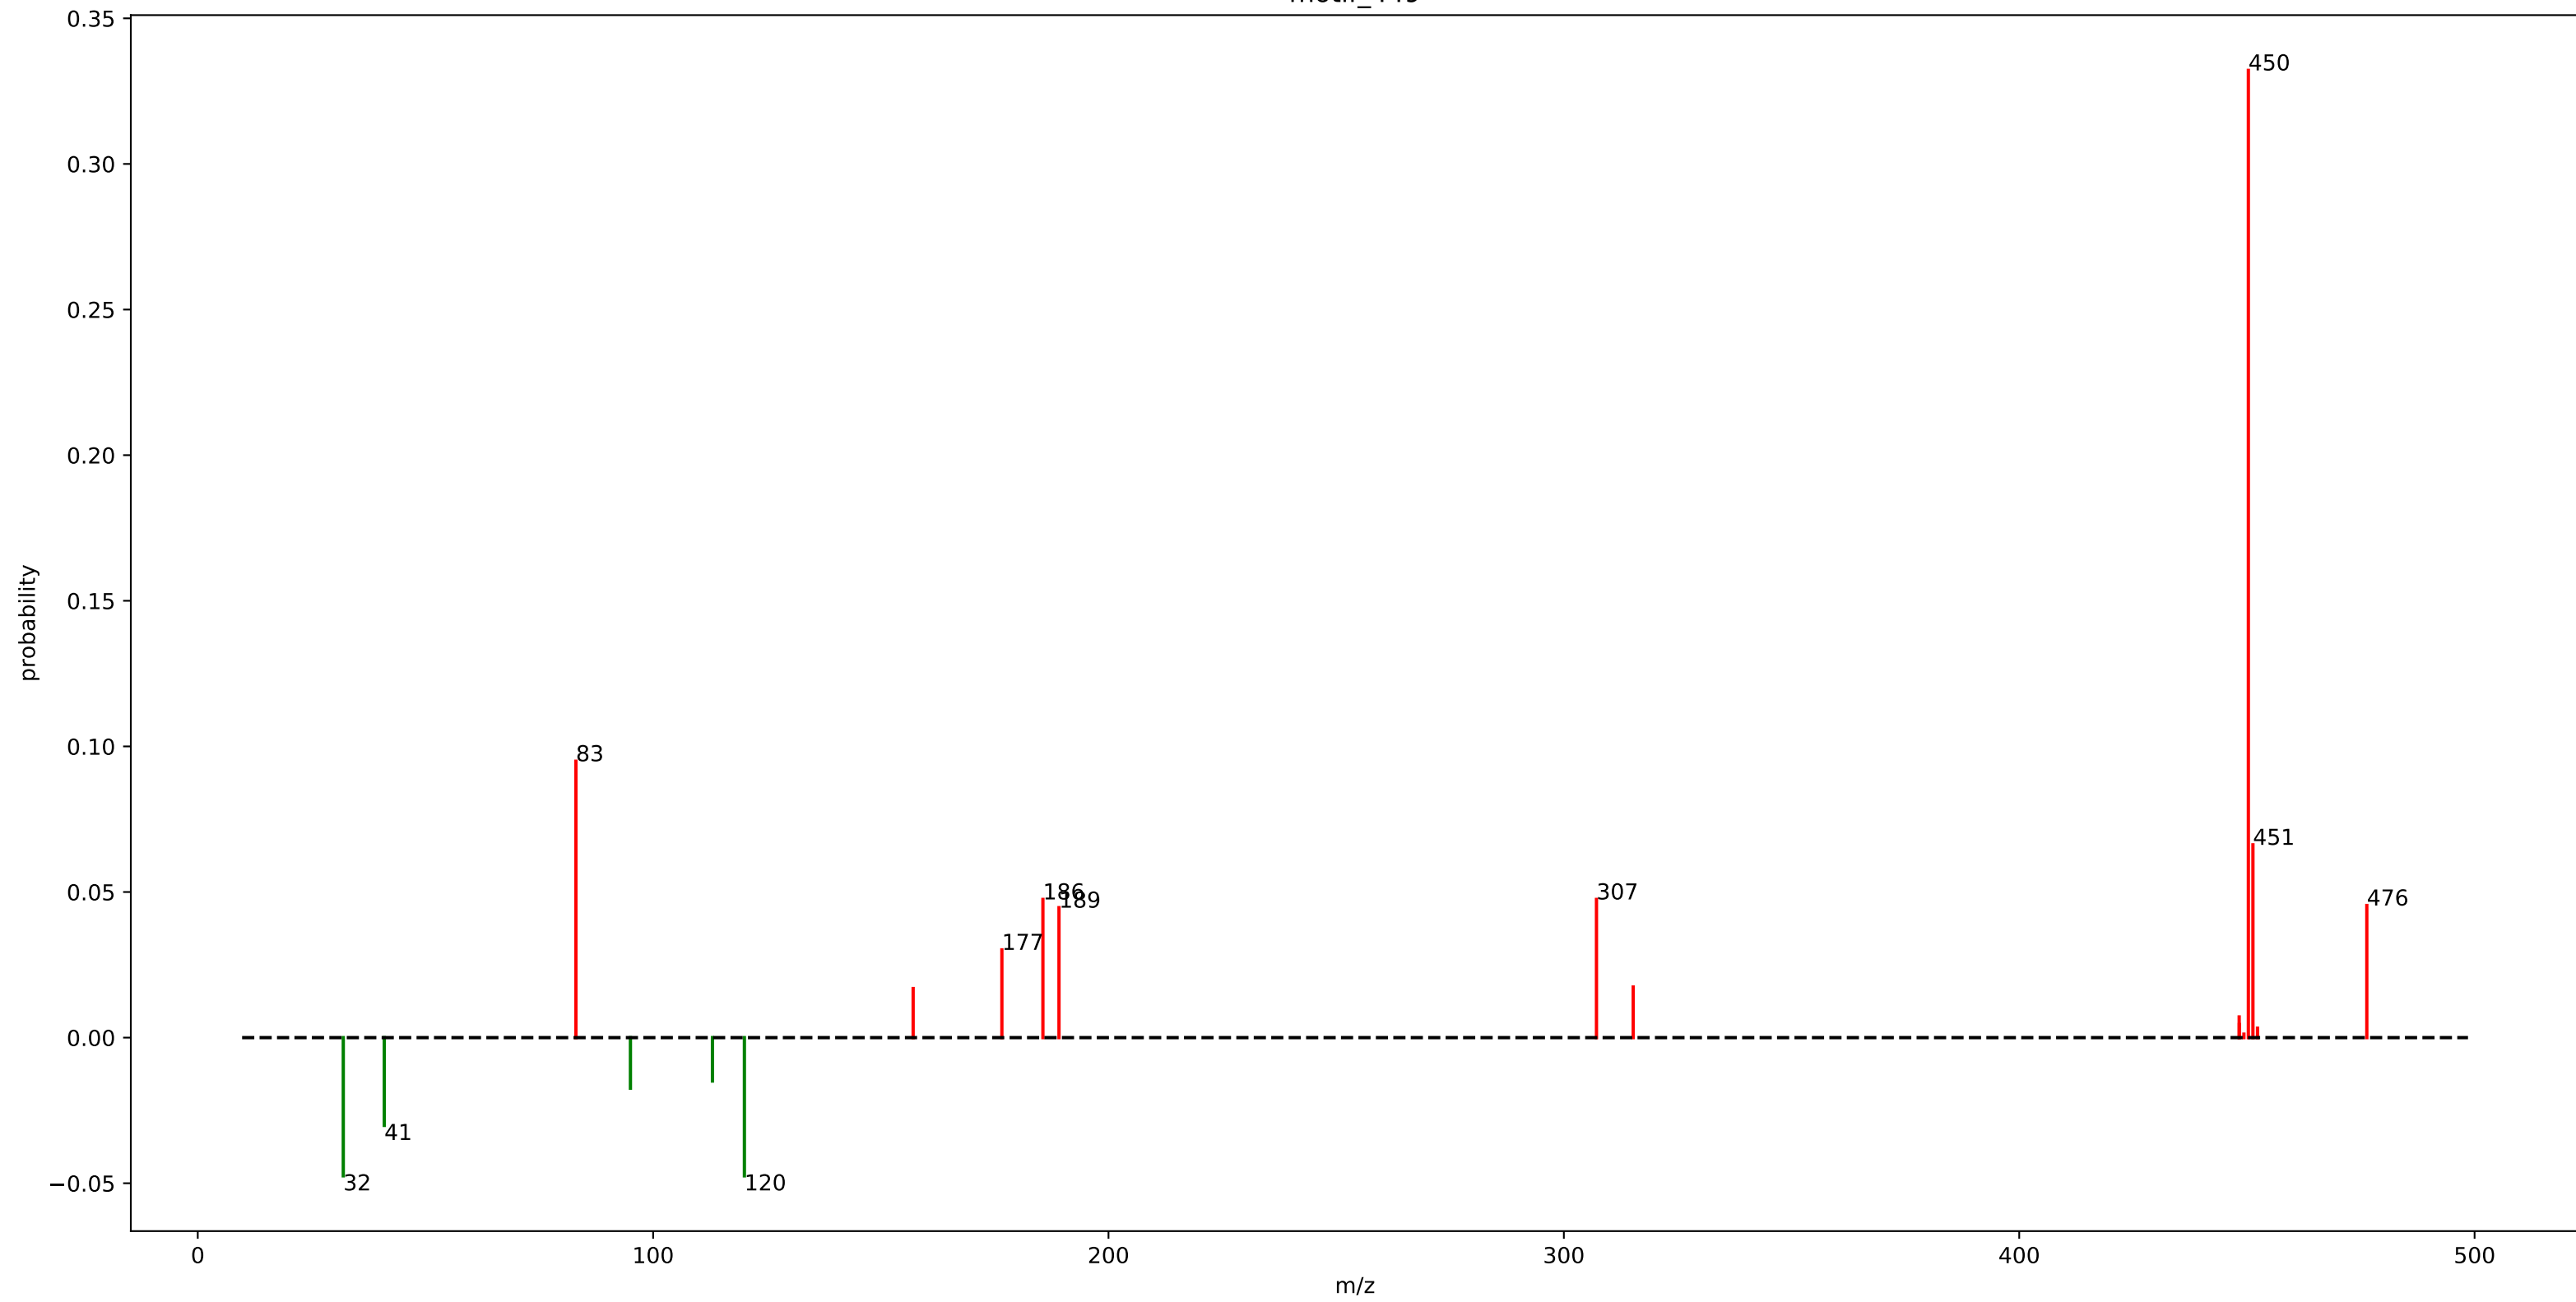

## motif\_449

|                   |        |
|-------------------|--------|
| fragment_450.3175 | : 0.33 |
| fragment_83.0475  | : 0.09 |
| fragment_451.3225 | : 0.07 |
| fragment_307.1625 | : 0.05 |
| fragment_185.5975 | : 0.05 |
| loss_120.0425     | : 0.05 |
| loss_31.9575      | : 0.05 |
| fragment_476.3325 | : 0.05 |
| fragment_189.1275 | : 0.04 |
| loss_40.9625      | : 0.03 |
| fragment_176.5875 | : 0.03 |
| loss_95.0175      | : 0.02 |
| fragment_315.2325 | : 0.02 |
| fragment_157.1025 | : 0.02 |
| loss_113.0275     | : 0.01 |
| fragment_448.3025 | : 0.01 |

motif\_448

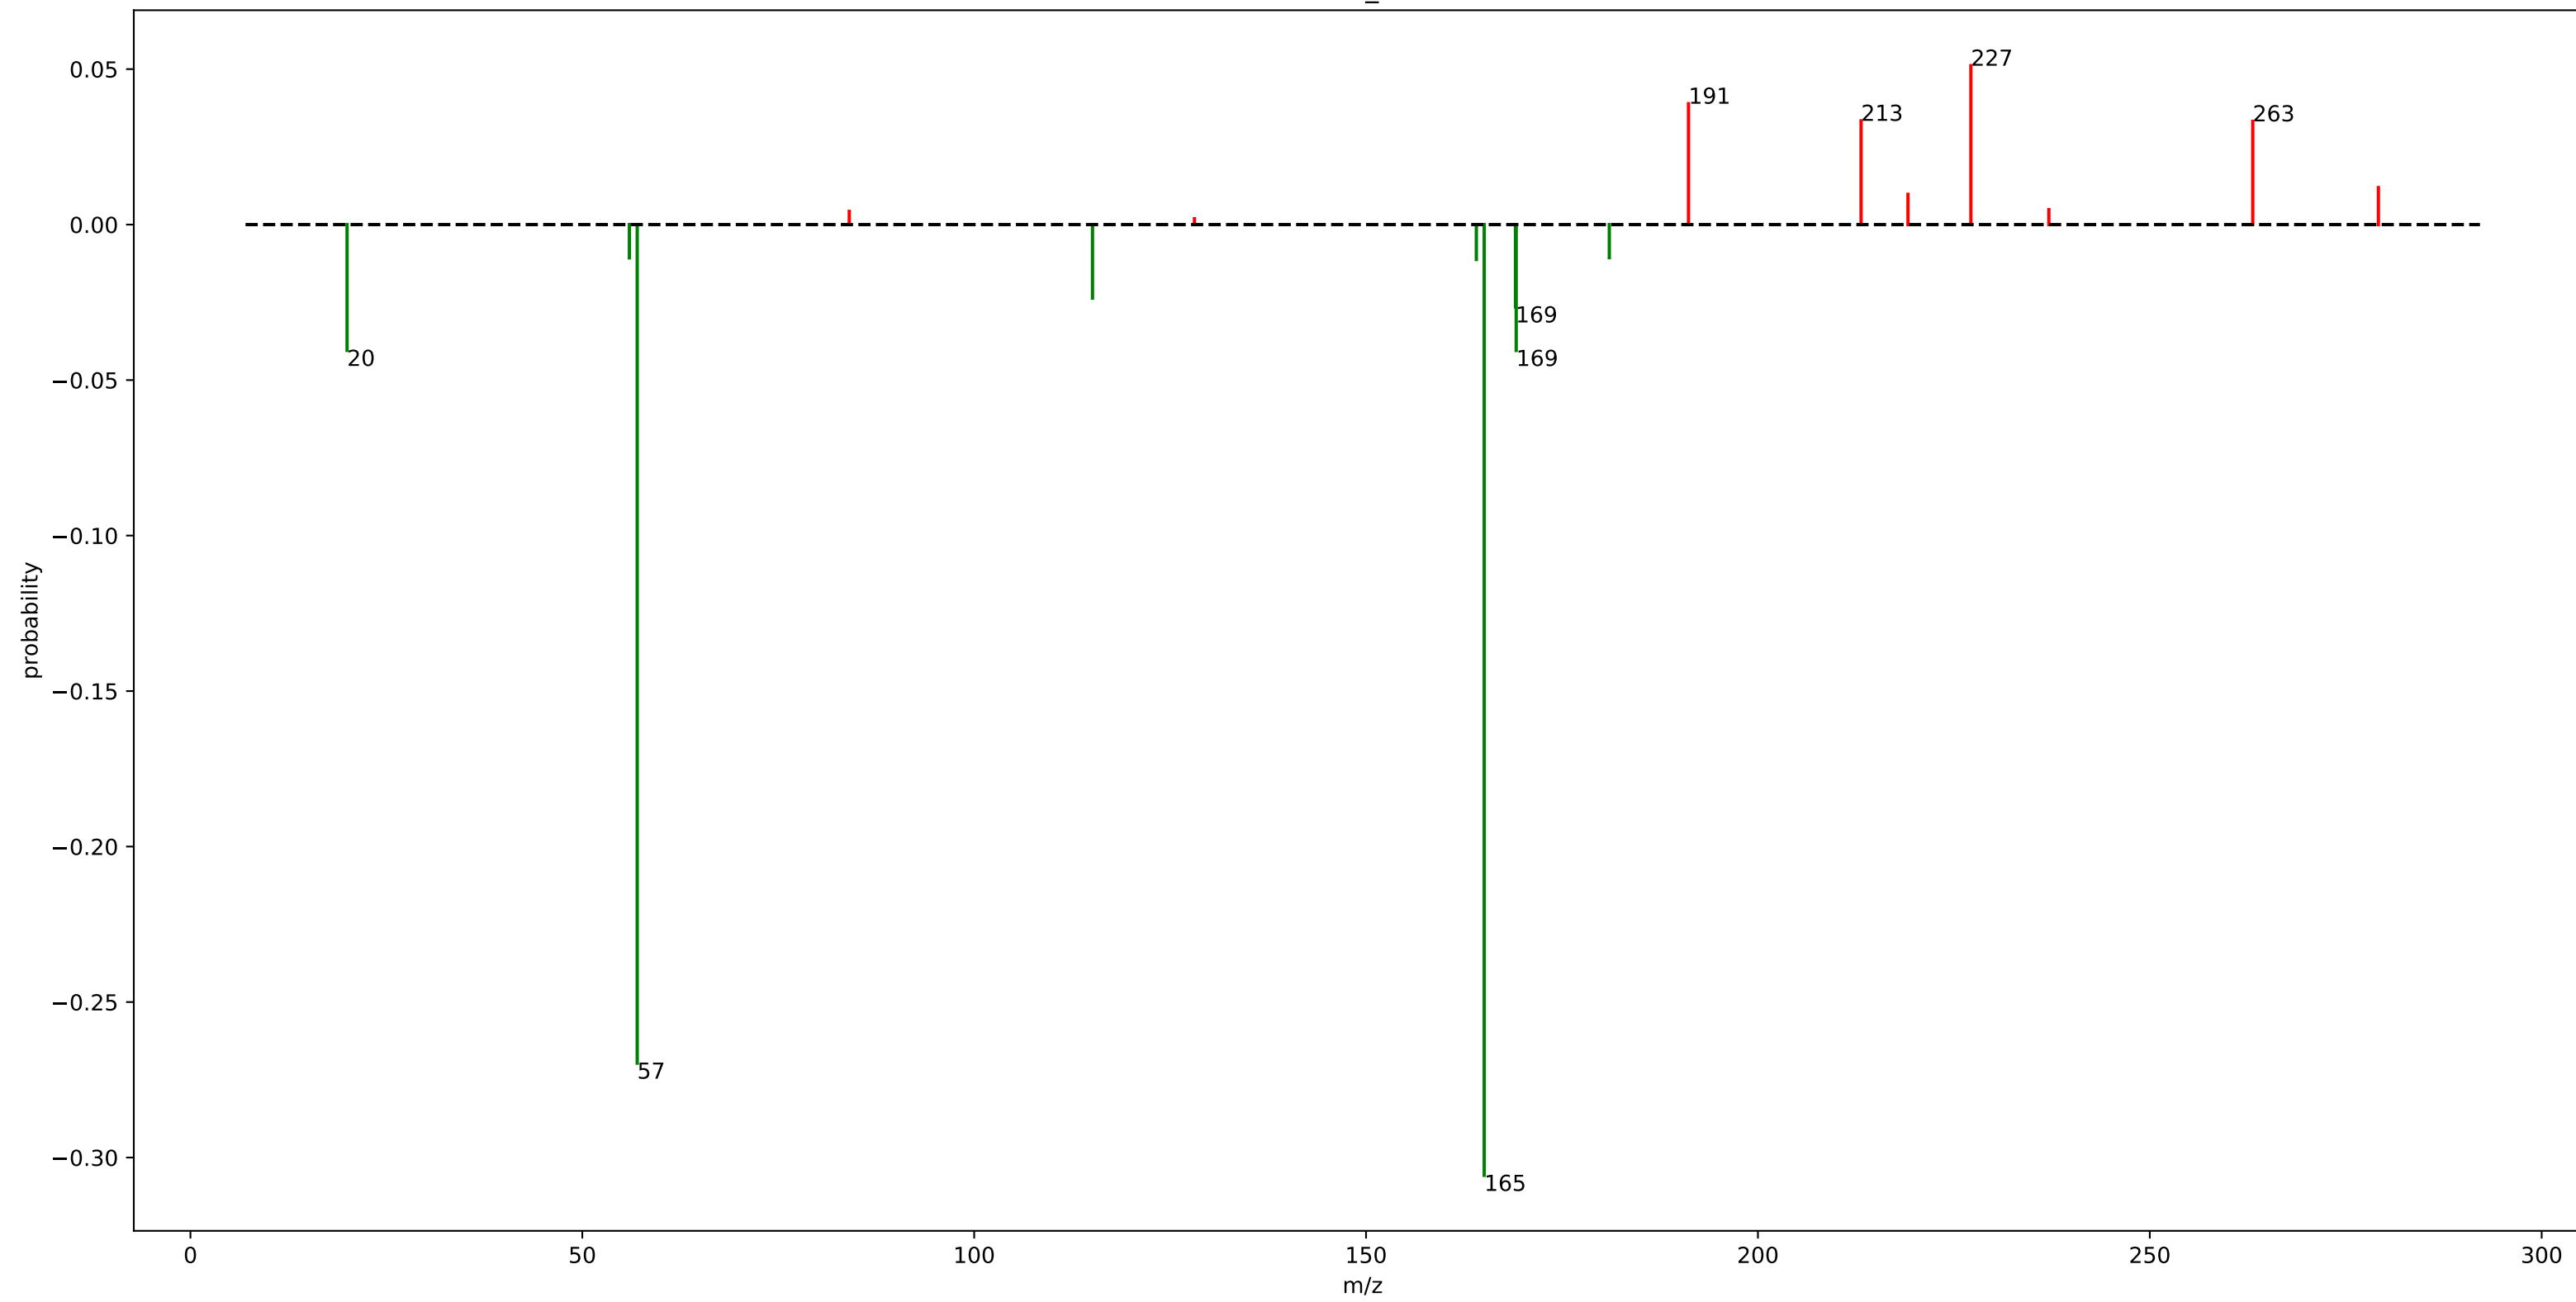

## motif\_448

|                   |        |
|-------------------|--------|
| loss_165.0775     | : 0.31 |
| loss_57.0075      | : 0.27 |
| fragment_227.1725 | : 0.05 |
| loss_169.1575     | : 0.04 |
| loss_19.9875      | : 0.04 |
| fragment_191.1425 | : 0.04 |
| fragment_213.1625 | : 0.03 |
| fragment_263.1375 | : 0.03 |
| loss_169.0725     | : 0.03 |
| loss_115.0975     | : 0.02 |
| fragment_279.1675 | : 0.01 |
| loss_164.0725     | : 0.01 |
| loss_56.0075      | : 0.01 |
| loss_181.0375     | : 0.01 |
| fragment_219.1475 | : 0.01 |

motif\_524

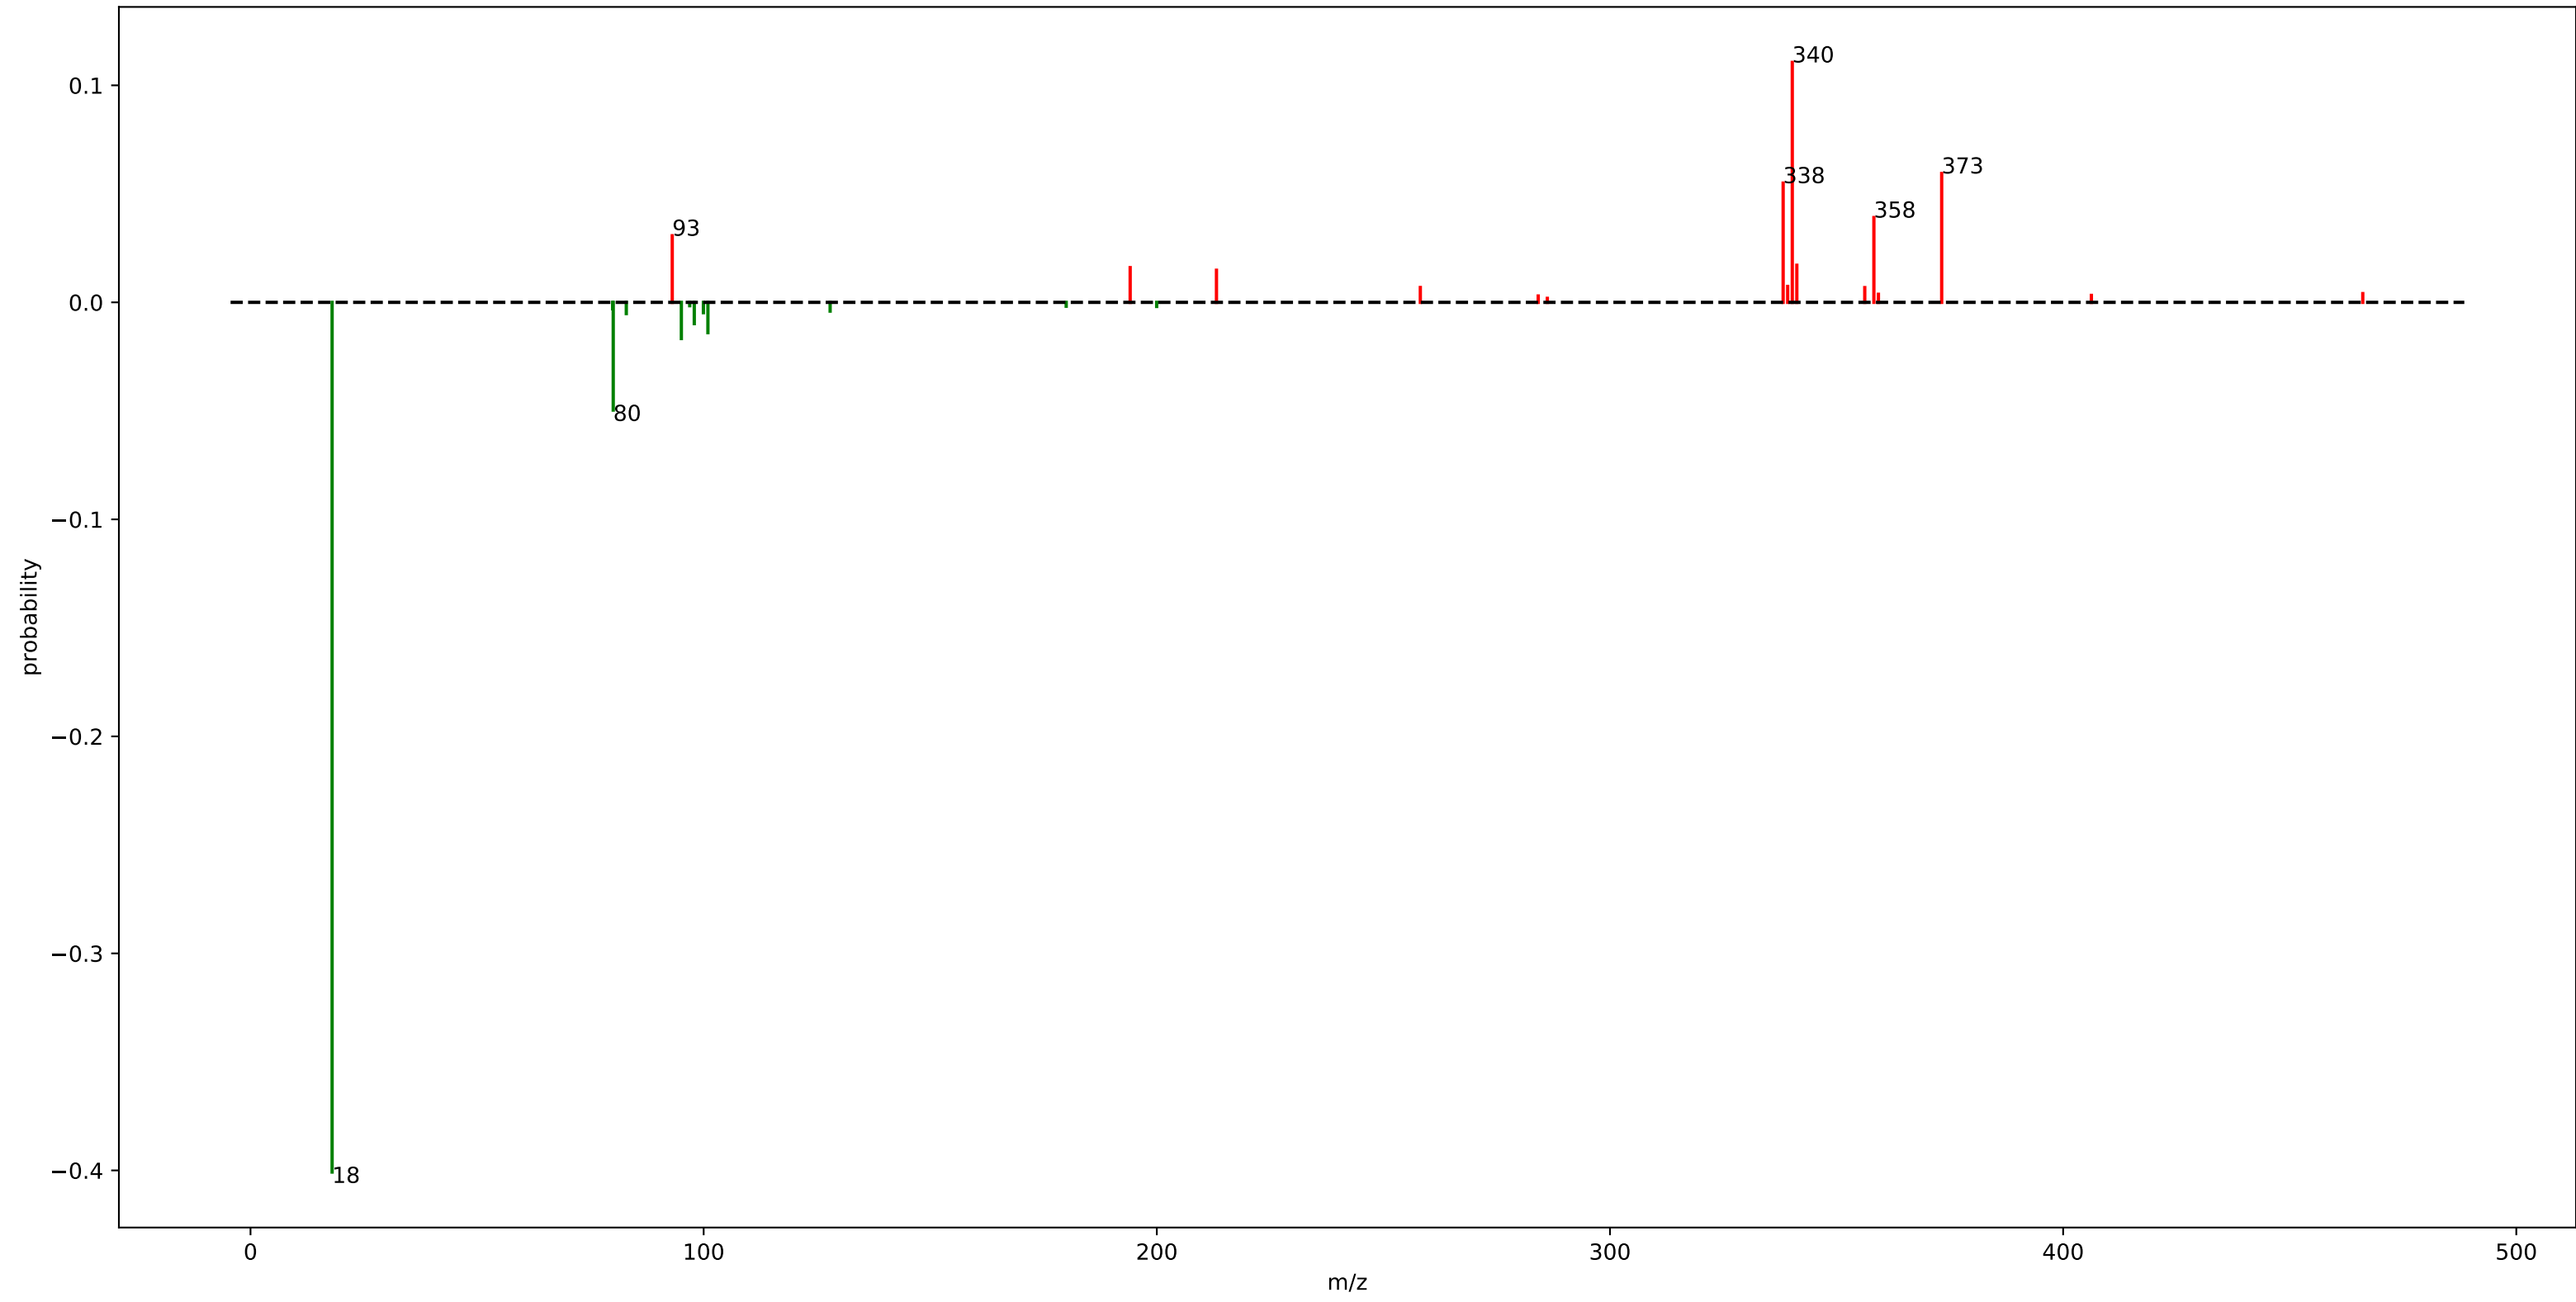

## motif\_524

|                   |        |
|-------------------|--------|
| loss_18.0075      | : 0.40 |
| fragment_340.2275 | : 0.11 |
| fragment_373.1975 | : 0.06 |
| fragment_338.2125 | : 0.05 |
| loss_80.0425      | : 0.05 |
| fragment_358.2375 | : 0.04 |
| fragment_93.0675  | : 0.03 |
| fragment_341.2325 | : 0.02 |
| loss_95.0775      | : 0.02 |
| fragment_194.1175 | : 0.02 |
| fragment_213.1625 | : 0.01 |
| loss_100.9375     | : 0.01 |
| loss_97.9275      | : 0.01 |
| fragment_339.2125 | : 0.01 |
| fragment_258.1475 | : 0.01 |
| fragment_356.2225 | : 0.01 |
| loss_82.9275      | : 0.01 |



motif\_525

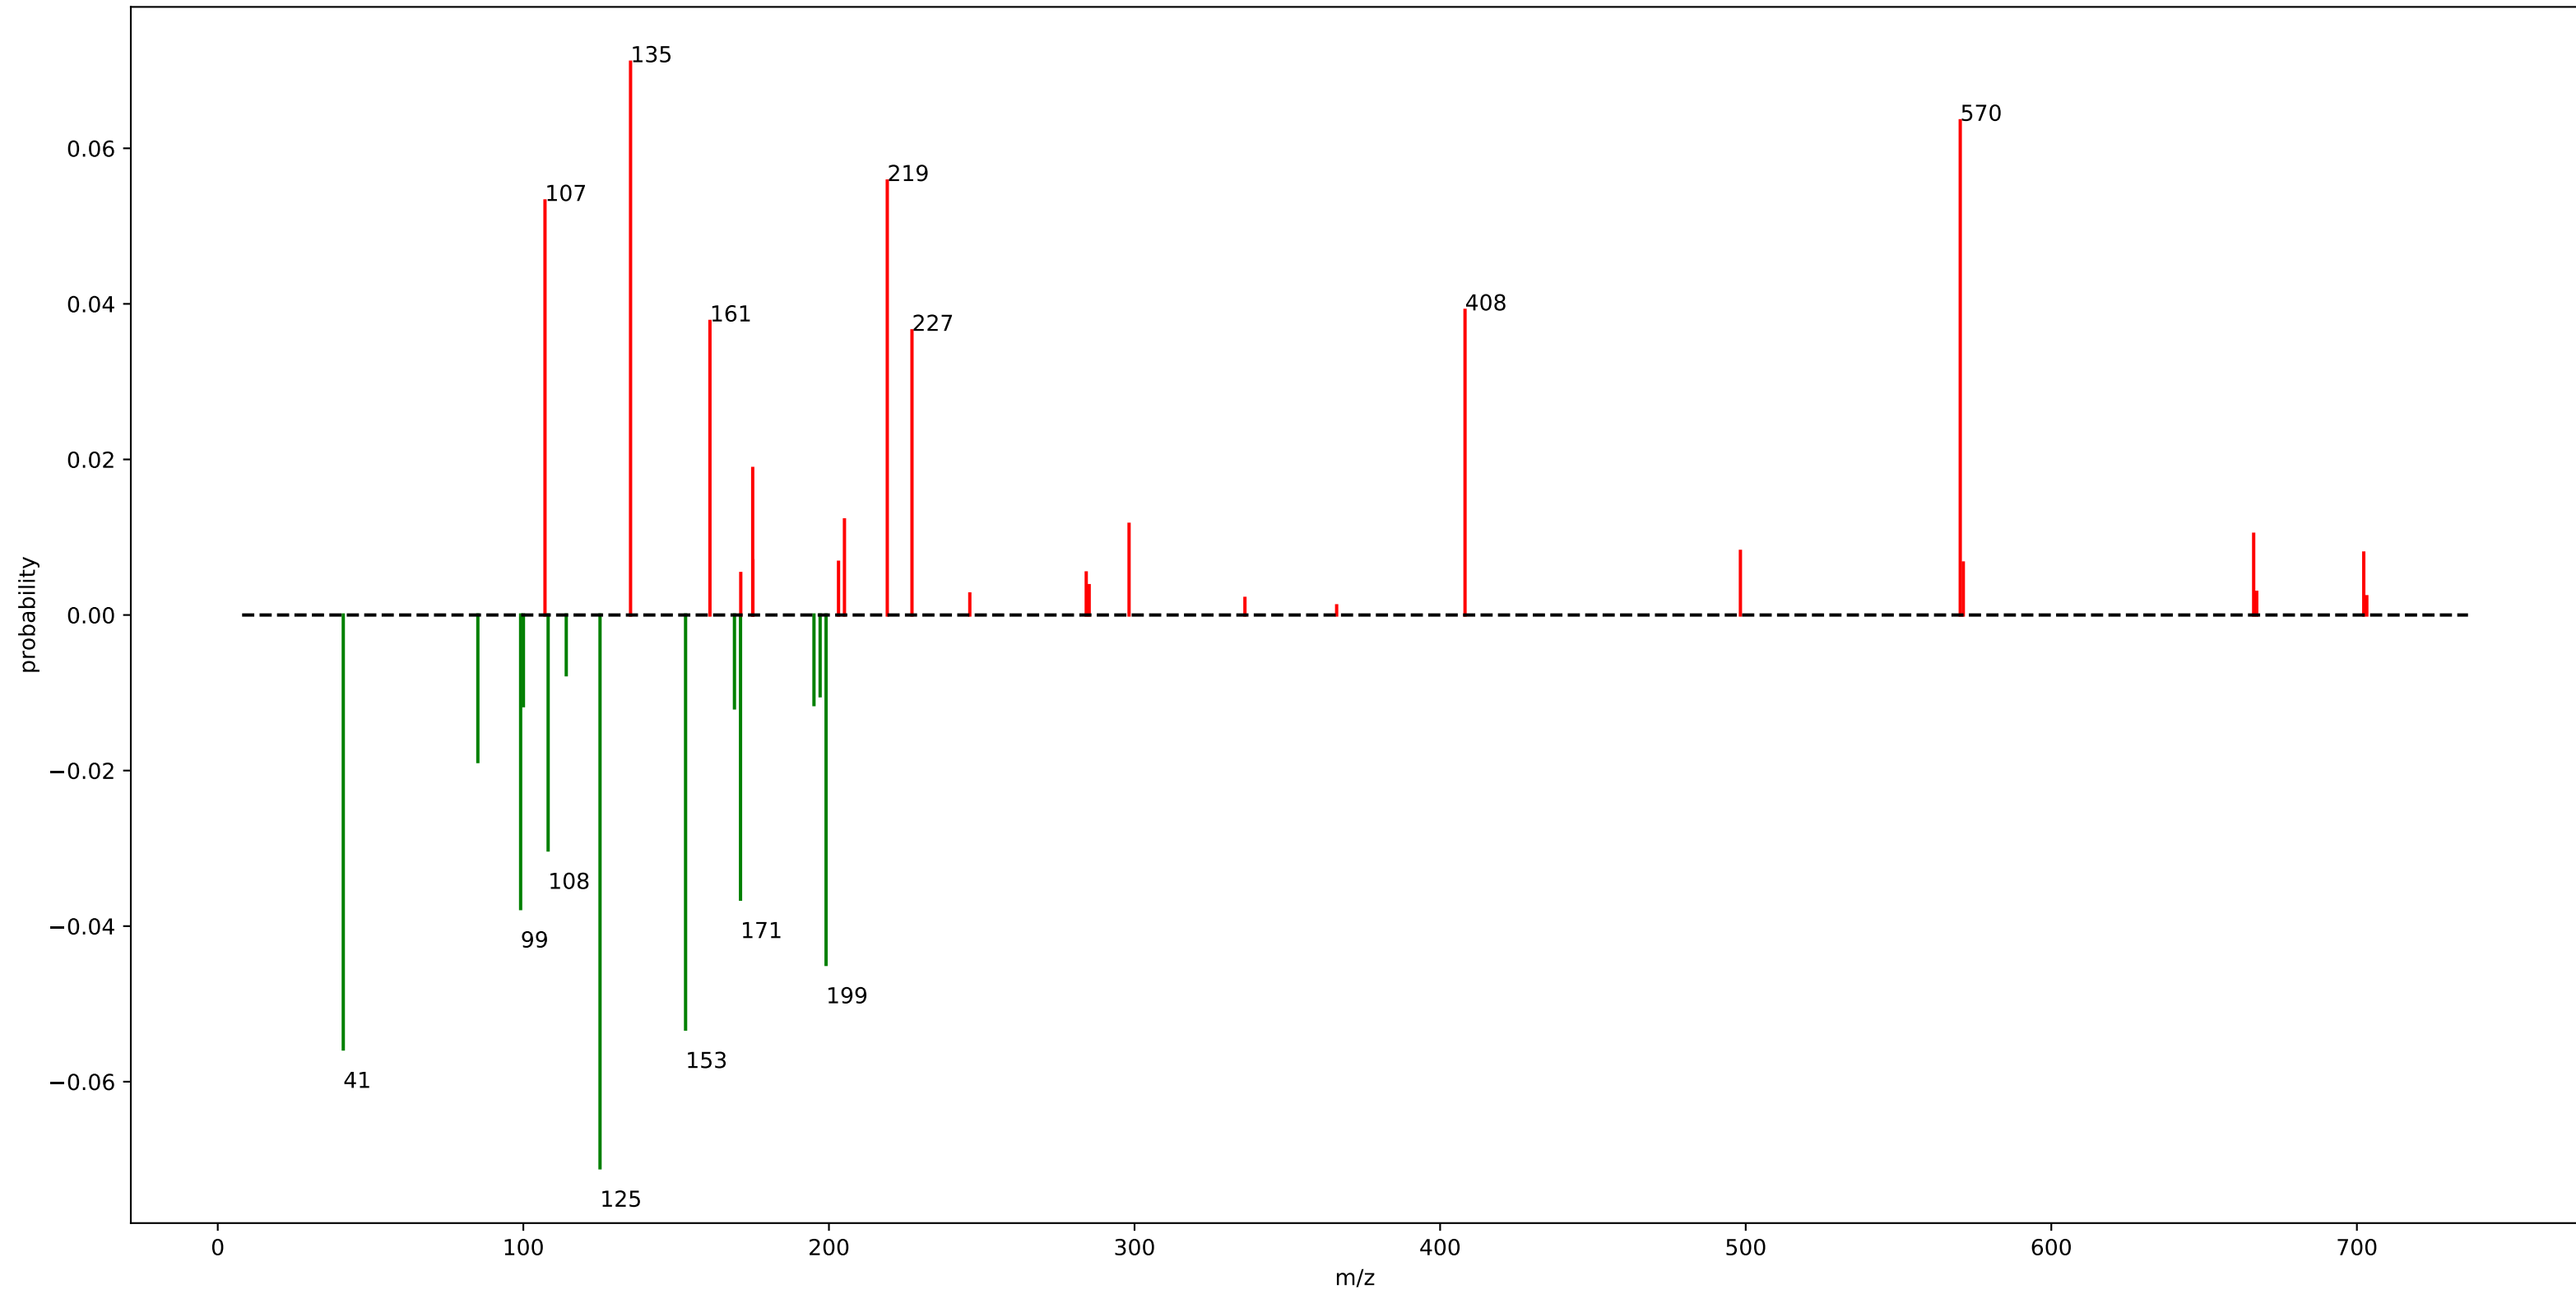

## motif\_525

|                   |        |                   |        |
|-------------------|--------|-------------------|--------|
| fragment_135.0825 | : 0.07 | loss_195.1025     | : 0.01 |
| loss_125.0925     | : 0.07 | loss_197.1175     | : 0.01 |
| fragment_570.2025 | : 0.06 | fragment_666.2225 | : 0.01 |
| loss_41.0775      | : 0.06 | fragment_498.2675 | : 0.01 |
| fragment_219.0925 | : 0.06 | fragment_702.2475 | : 0.01 |
| fragment_107.0825 | : 0.05 | loss_114.0425     | : 0.01 |
| loss_153.0875     | : 0.05 | fragment_175.1175 | : 0.01 |
| loss_199.0625     | : 0.04 | fragment_203.1375 | : 0.01 |
| fragment_408.1475 | : 0.04 | fragment_571.2075 | : 0.01 |
| fragment_161.0625 | : 0.04 | fragment_284.1975 | : 0.01 |
| loss_99.1125      | : 0.04 | fragment_171.1475 | : 0.01 |
| loss_171.0675     | : 0.04 |                   |        |
| fragment_227.1725 | : 0.04 |                   |        |
| loss_108.1125     | : 0.03 |                   |        |
| fragment_175.0575 | : 0.02 |                   |        |
| loss_85.1125      | : 0.02 |                   |        |
| fragment_205.0775 | : 0.01 |                   |        |
| loss_169.0825     | : 0.01 |                   |        |
| loss_100.0275     | : 0.01 |                   |        |
| fragment_298.2125 | : 0.01 |                   |        |

mb\_motif\_12.m2m

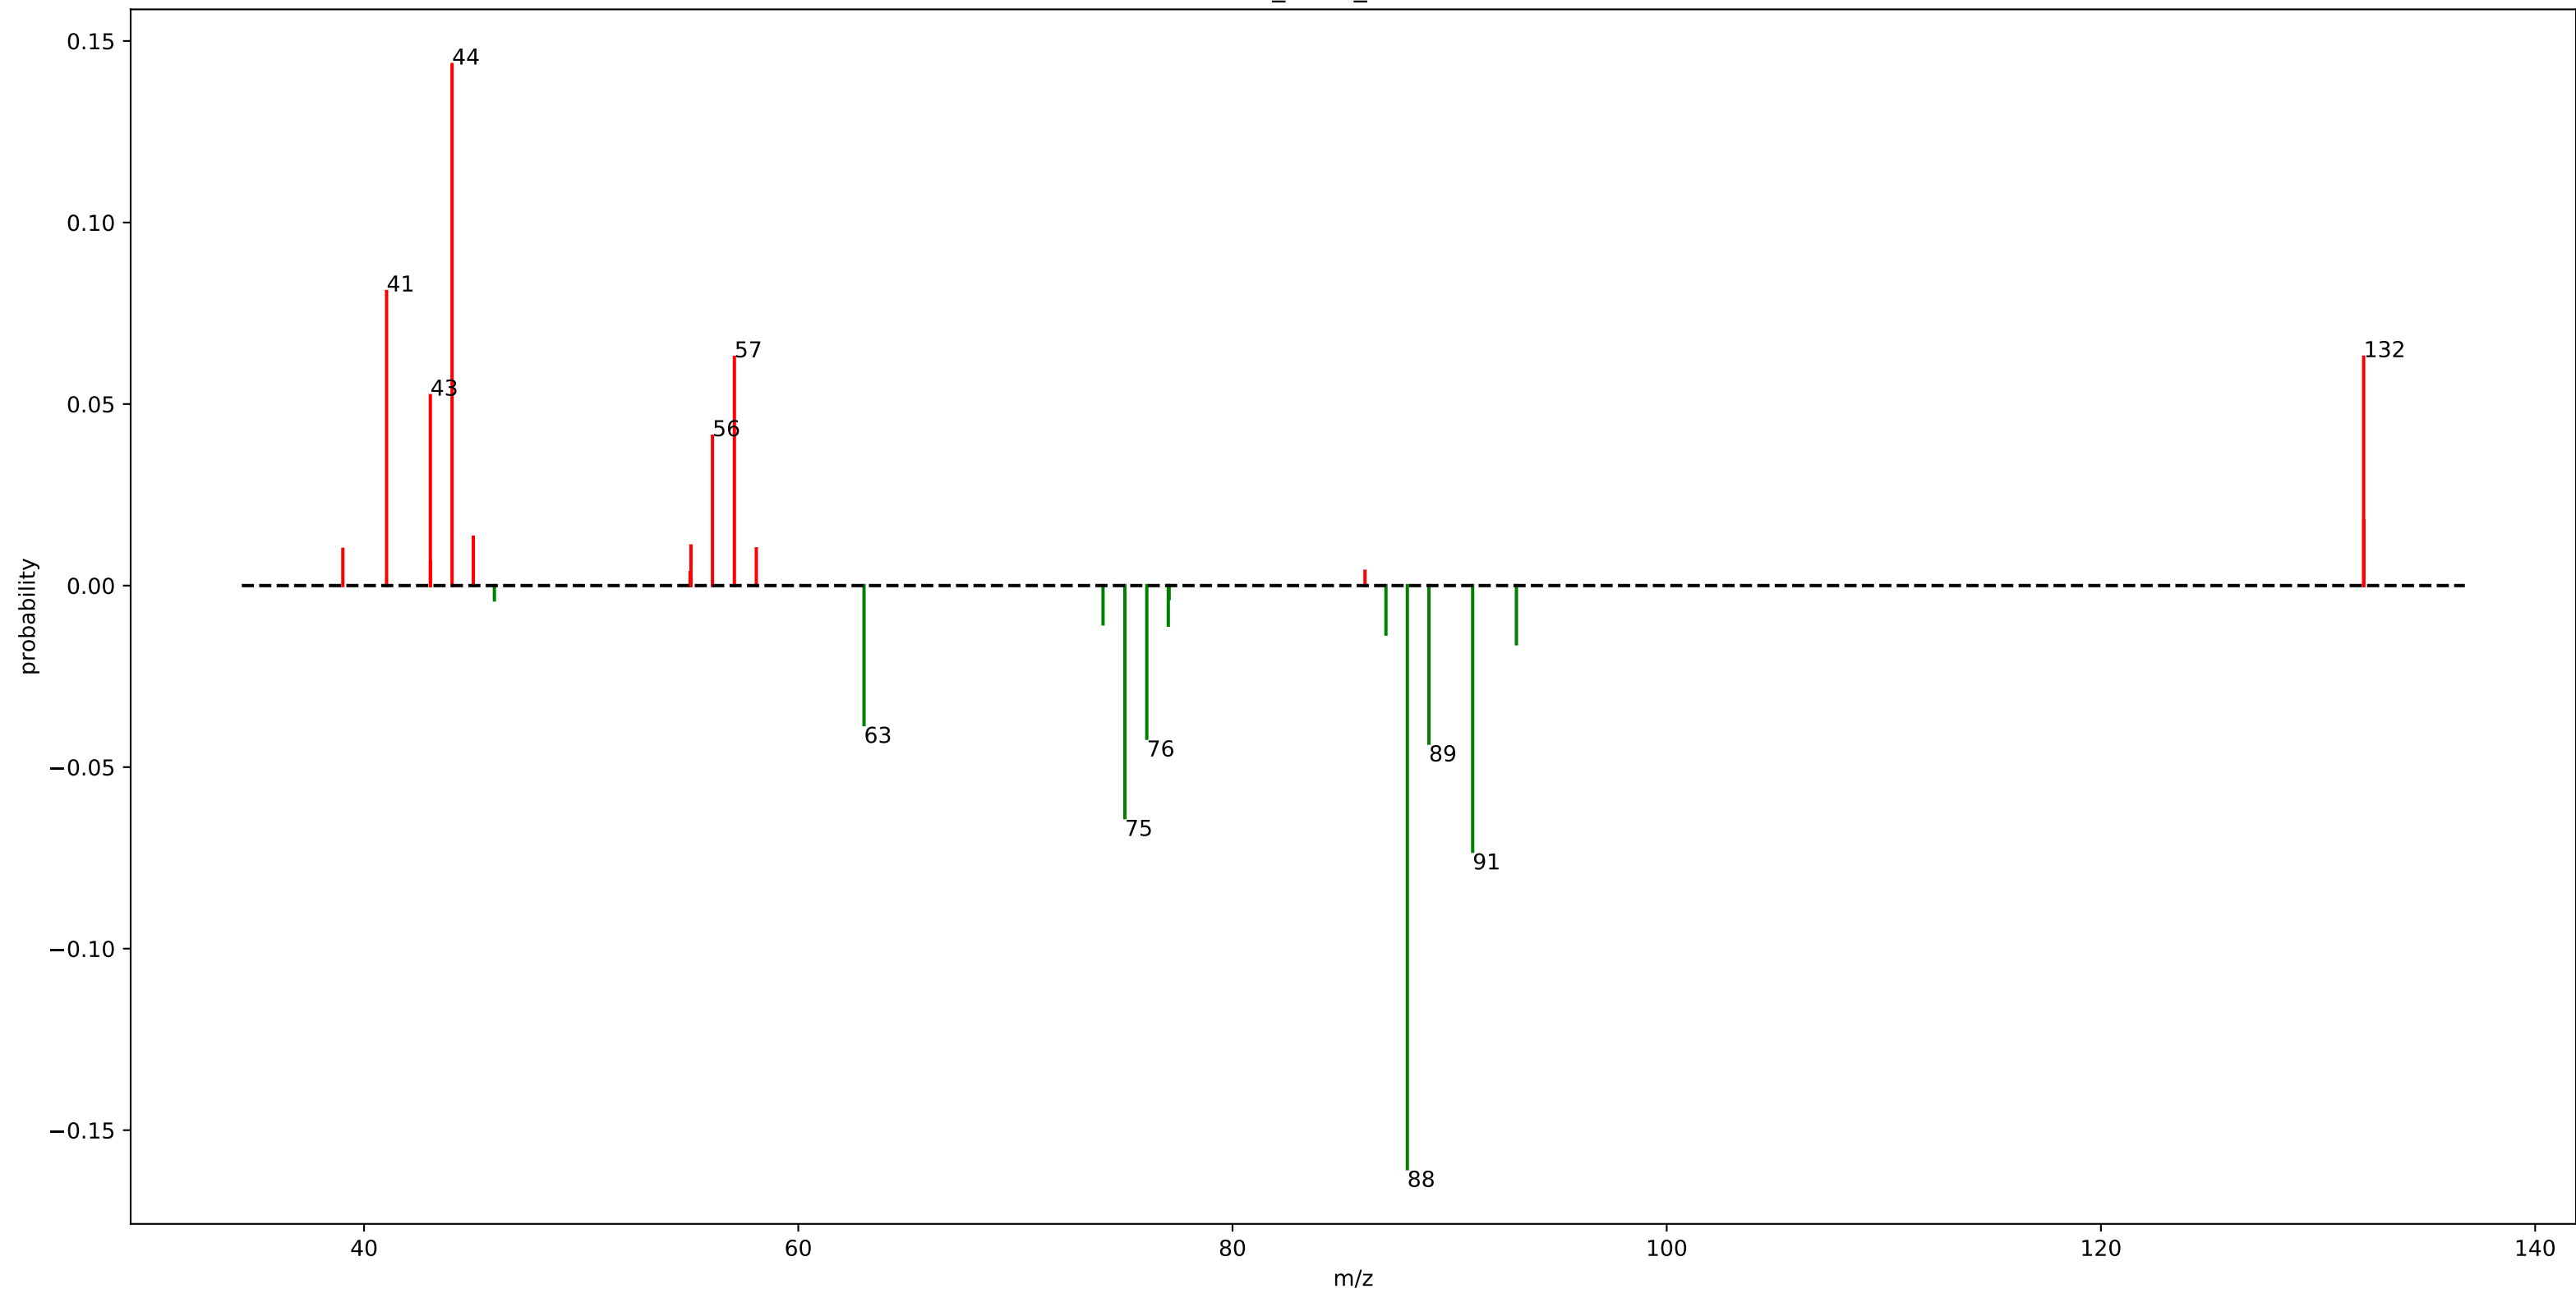

## mb\_motif\_12.m2m

|                   |        |                  |        |
|-------------------|--------|------------------|--------|
| loss_88.0525      | : 0.16 | fragment_39.0225 | : 0.01 |
| fragment_44.0525  | : 0.14 | fragment_43.0575 | : 0.01 |
| fragment_41.0375  | : 0.08 |                  |        |
| loss_91.0625      | : 0.07 |                  |        |
| loss_75.0425      | : 0.06 |                  |        |
| fragment_132.1025 | : 0.06 |                  |        |
| fragment_57.0575  | : 0.06 |                  |        |
| fragment_43.0525  | : 0.05 |                  |        |
| loss_89.0475      | : 0.04 |                  |        |
| loss_76.0525      | : 0.04 |                  |        |
| fragment_56.0475  | : 0.04 |                  |        |
| loss_63.0275      | : 0.04 |                  |        |
| fragment_132.1075 | : 0.02 |                  |        |
| loss_93.0775      | : 0.02 |                  |        |
| fragment_45.0325  | : 0.01 |                  |        |
| loss_87.0675      | : 0.01 |                  |        |
| loss_77.0425      | : 0.01 |                  |        |
| fragment_55.0575  | : 0.01 |                  |        |
| loss_74.0375      | : 0.01 |                  |        |
| fragment_58.0675  | : 0.01 |                  |        |

gnps\_motif\_28.m2m

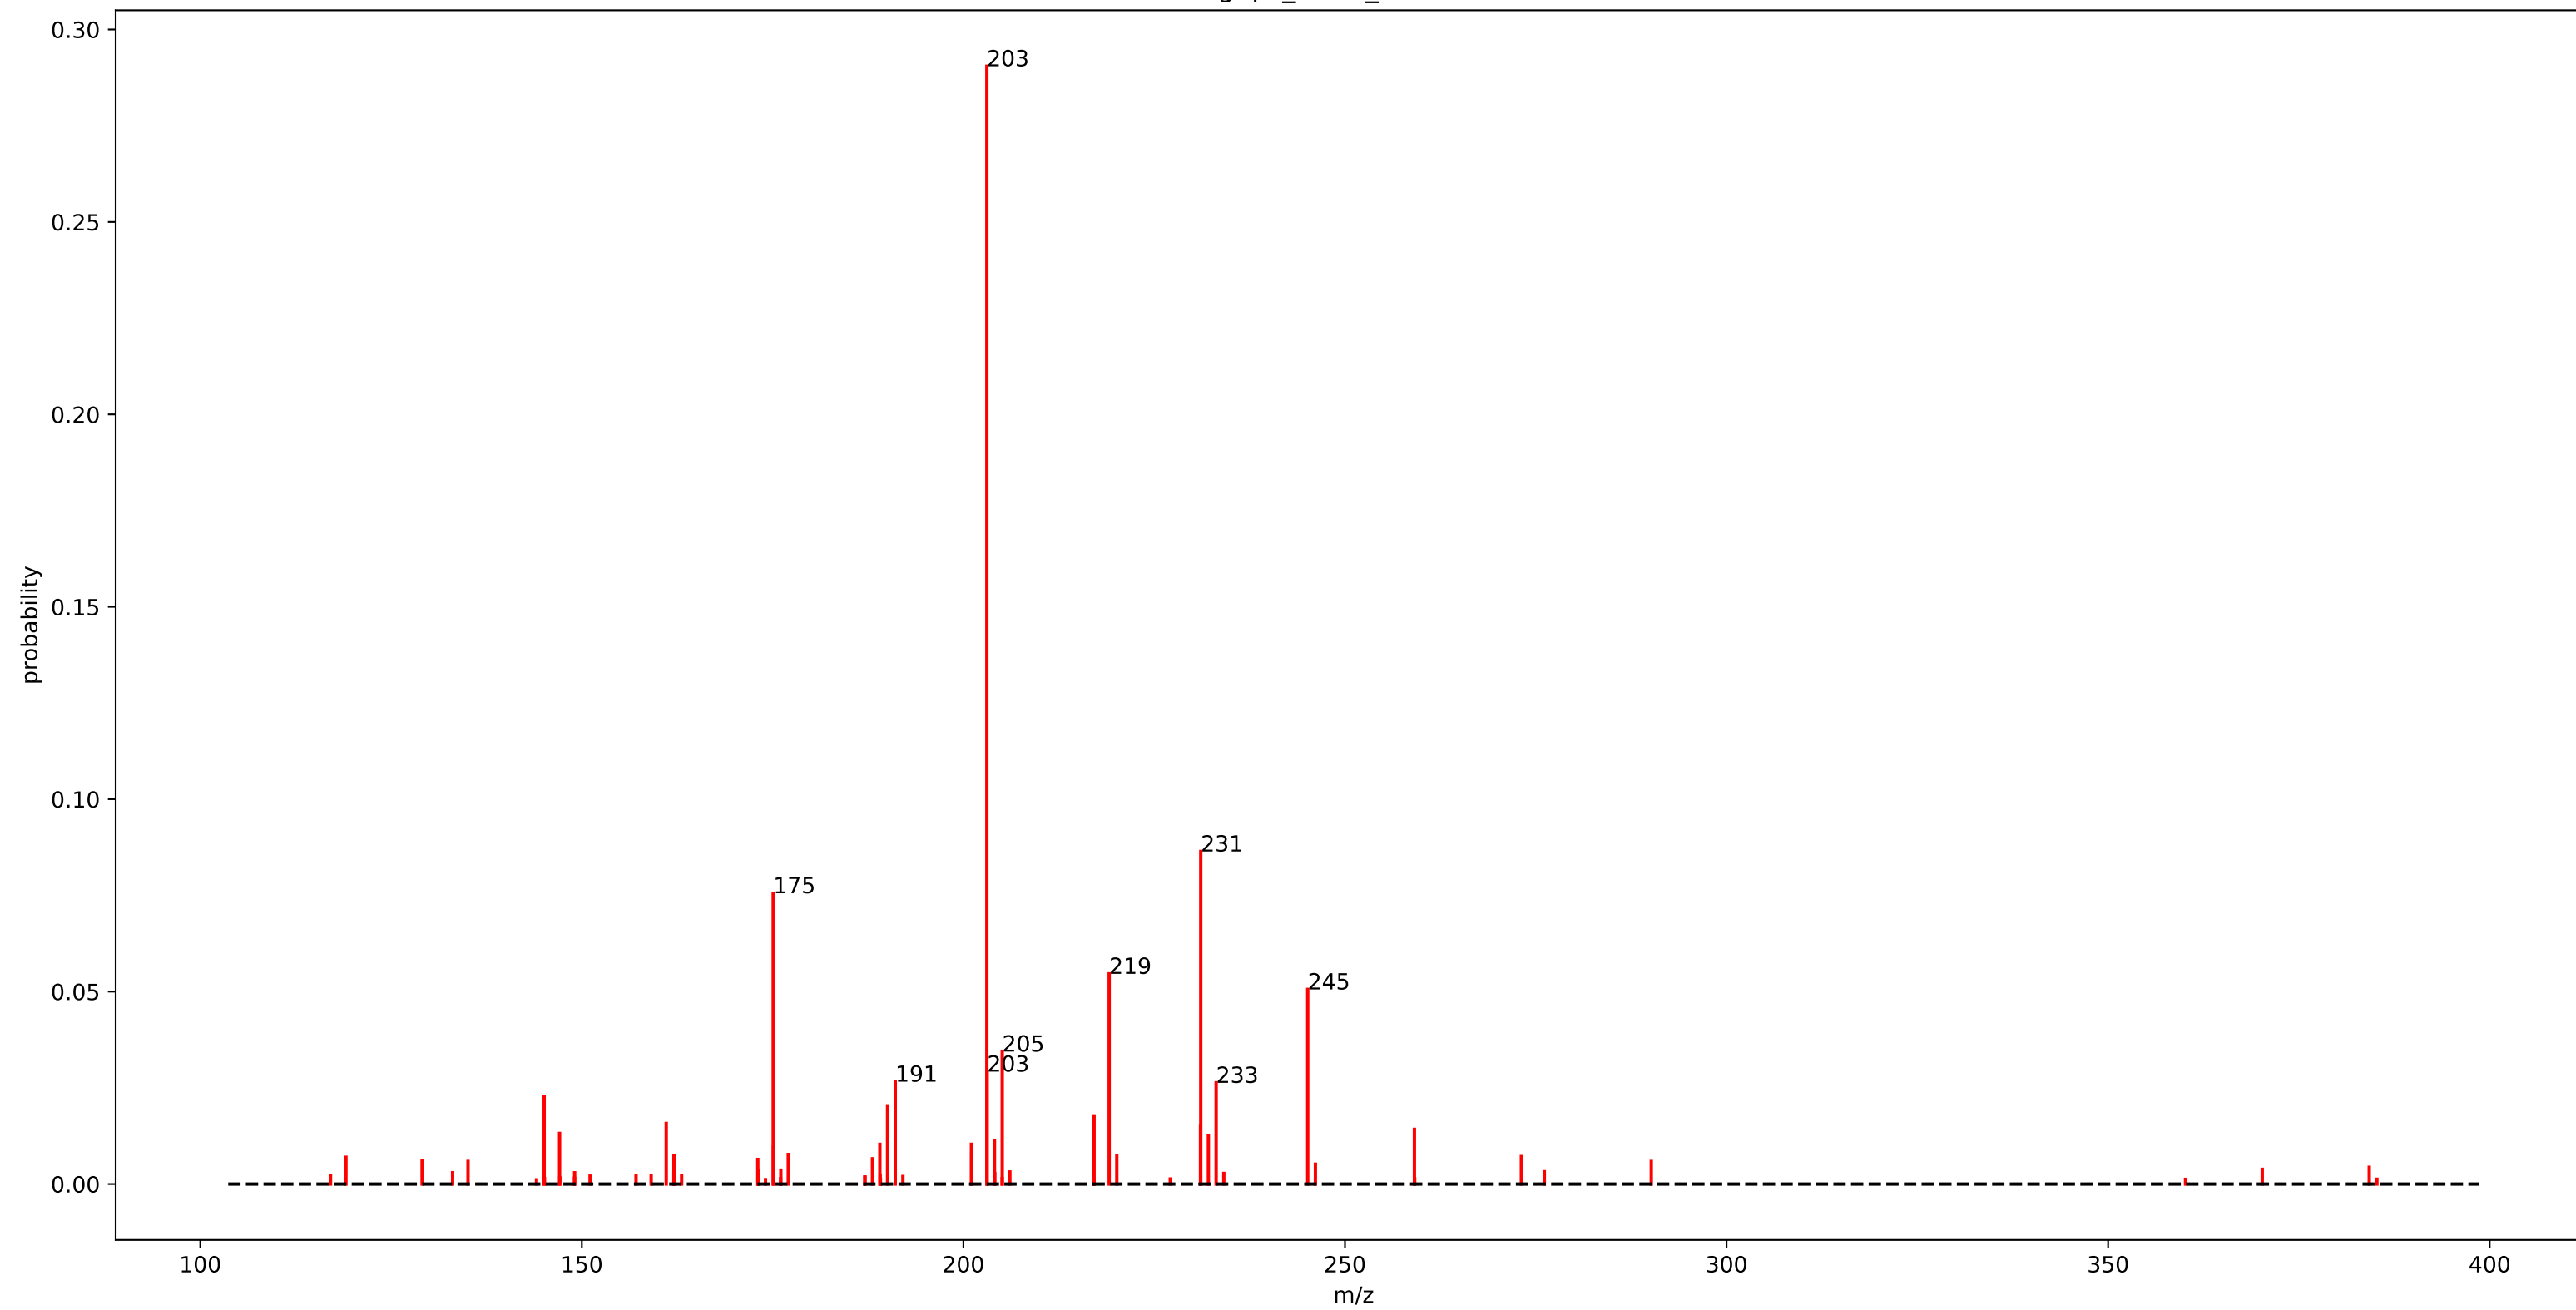

## gnps\_motif\_28.m2m

|                   |        |                   |        |
|-------------------|--------|-------------------|--------|
| fragment_203.0725 | : 0.29 | fragment_175.1125 | : 0.01 |
| fragment_231.1025 | : 0.09 | fragment_177.0525 | : 0.01 |
| fragment_175.0775 | : 0.08 | fragment_201.0925 | : 0.01 |
| fragment_219.1025 | : 0.05 | fragment_162.0675 | : 0.01 |
| fragment_245.1175 | : 0.05 | fragment_220.1025 | : 0.01 |
| fragment_205.0875 | : 0.03 | fragment_273.1125 | : 0.01 |
| fragment_203.1075 | : 0.03 | fragment_119.0875 | : 0.01 |
| fragment_191.0725 | : 0.03 | fragment_188.0825 | : 0.01 |
| fragment_233.1175 | : 0.03 | fragment_173.0575 | : 0.01 |
| fragment_145.0625 | : 0.02 | fragment_129.0675 | : 0.01 |
| fragment_190.0625 | : 0.02 | fragment_135.0825 | : 0.01 |
| fragment_217.1225 | : 0.02 | fragment_290.1375 | : 0.01 |
| fragment_161.0575 | : 0.02 | fragment_246.1225 | : 0.01 |
| fragment_231.0675 | : 0.02 |                   |        |
| fragment_259.0975 | : 0.01 |                   |        |
| fragment_147.0825 | : 0.01 |                   |        |
| fragment_232.1025 | : 0.01 |                   |        |
| fragment_204.0725 | : 0.01 |                   |        |
| fragment_189.0525 | : 0.01 |                   |        |
| fragment_201.0525 | : 0.01 |                   |        |

urine\_mass2motif\_292.m2m

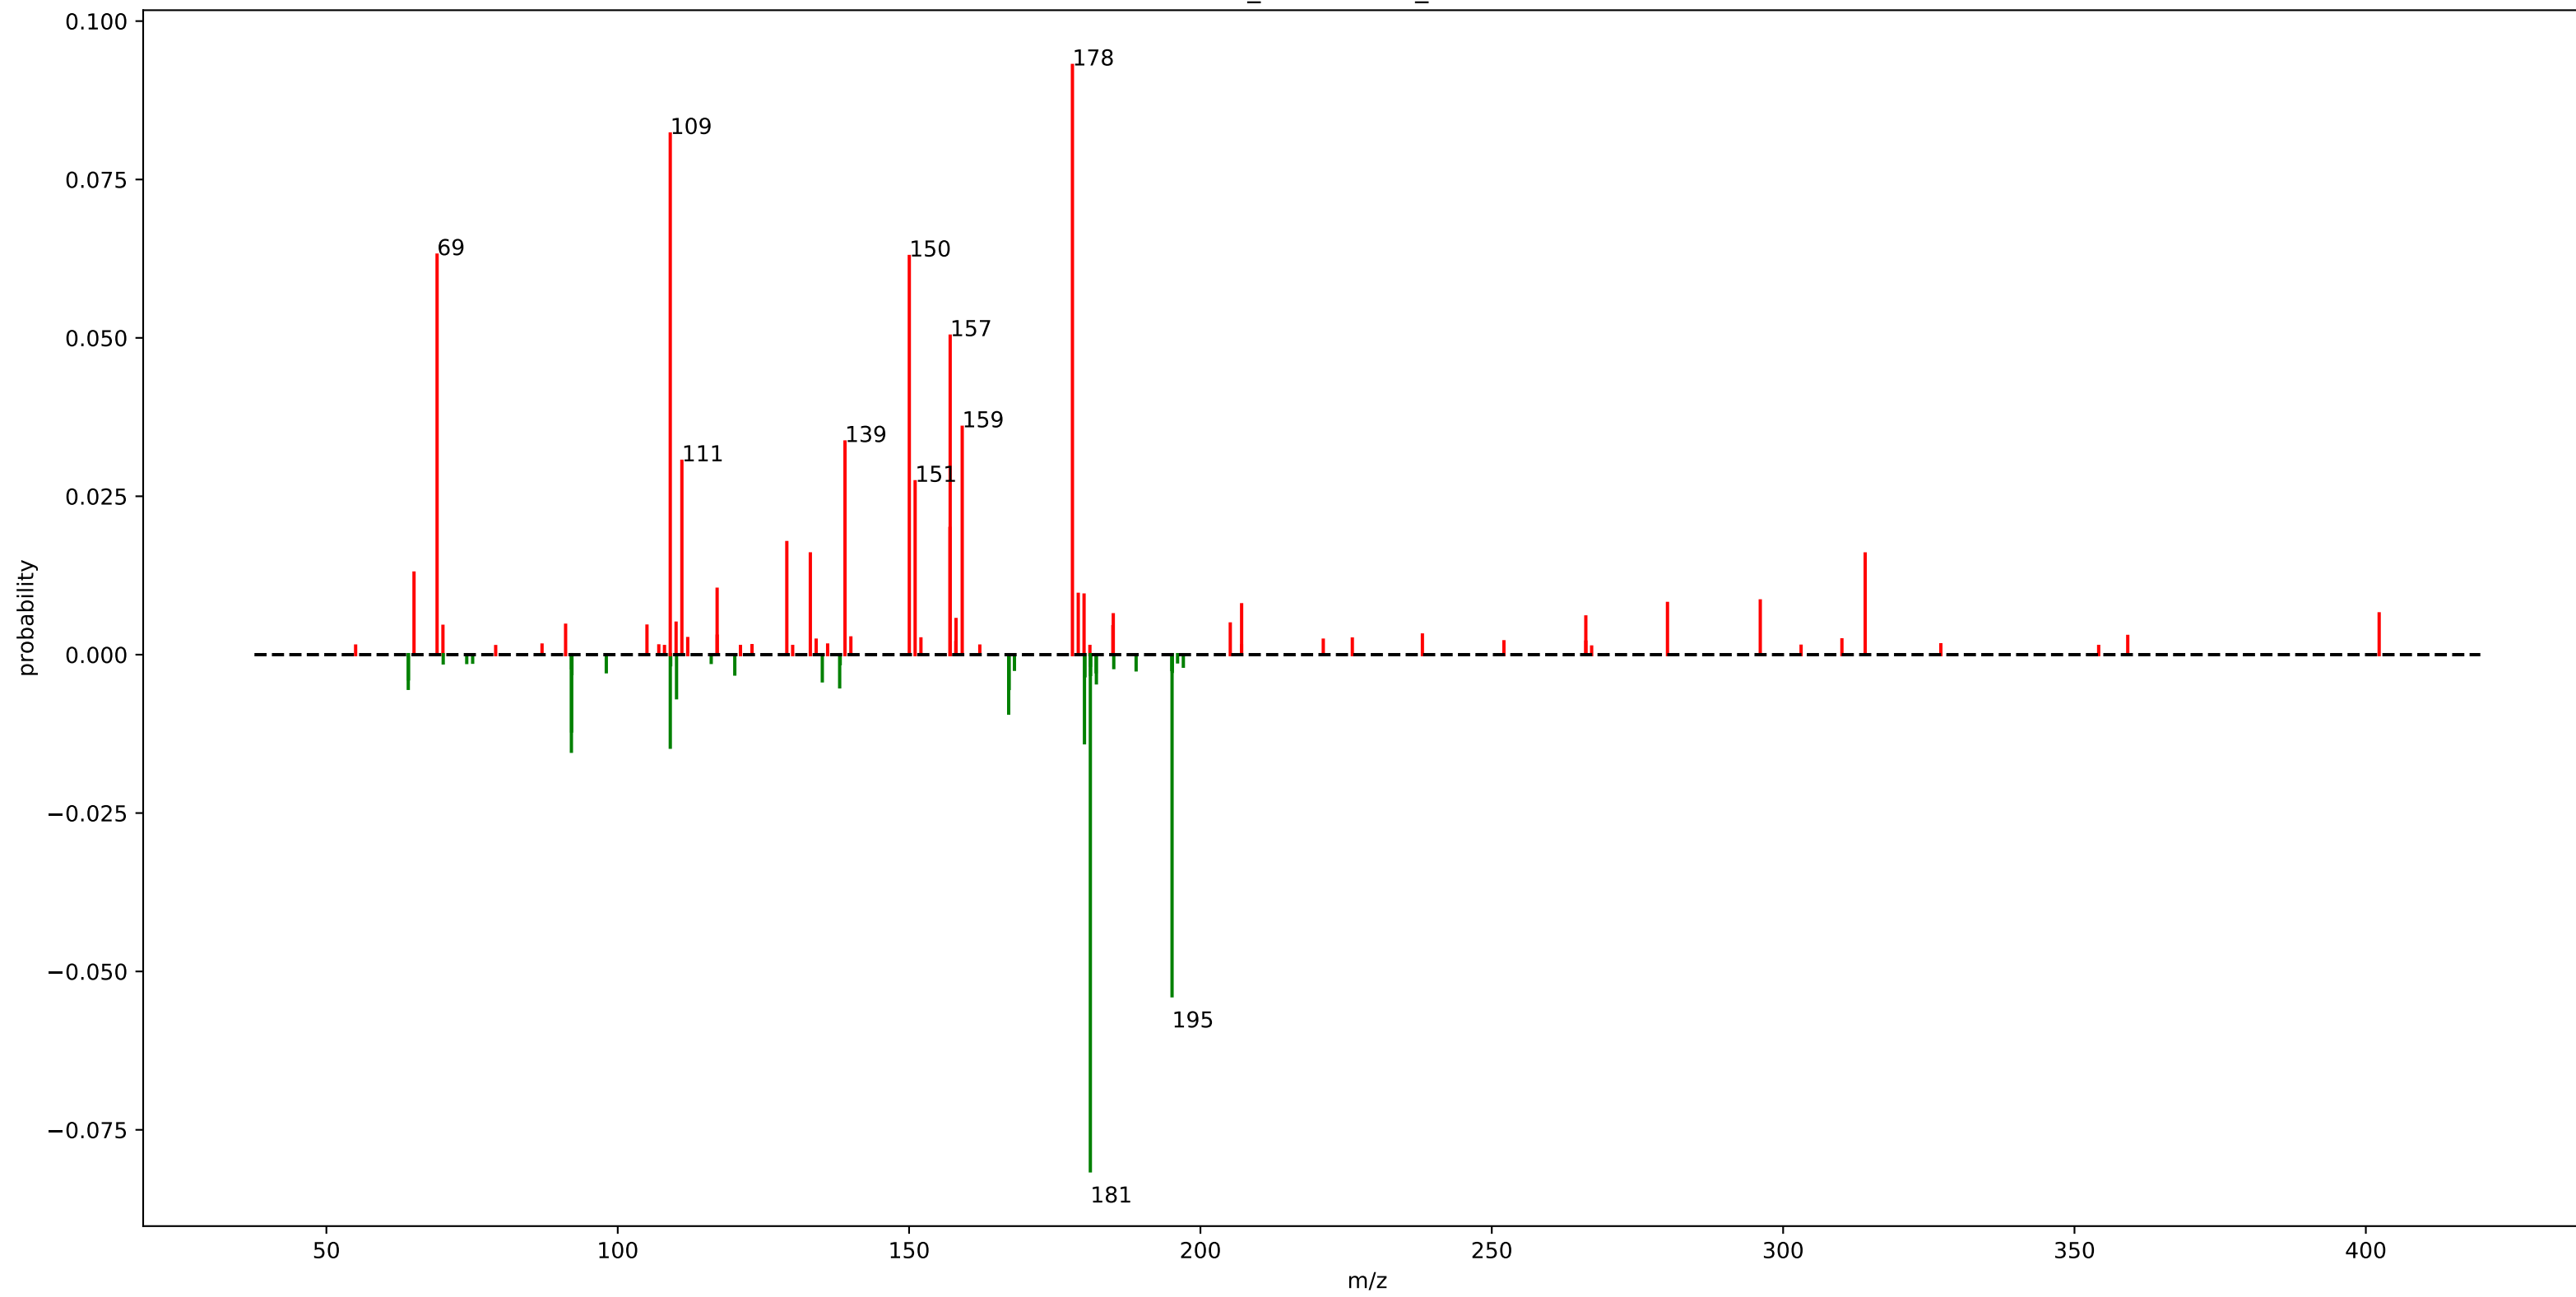

# urine\_mass2motif\_292.m2m

|                   |        |                   |        |
|-------------------|--------|-------------------|--------|
| fragment_178.0325 | : 0.09 | fragment_117.0575 | : 0.01 |
| fragment_109.0125 | : 0.08 | fragment_179.0325 | : 0.01 |
| loss_181.1075     | : 0.08 | fragment_180.0275 | : 0.01 |
| fragment_68.9975  | : 0.06 | loss_167.0925     | : 0.01 |
| fragment_150.0375 | : 0.06 | fragment_296.0775 | : 0.01 |
| loss_195.1275     | : 0.05 | fragment_280.1525 | : 0.01 |
| fragment_157.0525 | : 0.05 | fragment_207.0675 | : 0.01 |
| fragment_159.1175 | : 0.04 | loss_110.0925     | : 0.01 |
| fragment_139.0025 | : 0.03 | fragment_402.2875 | : 0.01 |
| fragment_111.0075 | : 0.03 | fragment_185.0425 | : 0.01 |
| fragment_151.0375 | : 0.03 | fragment_266.1375 | : 0.01 |
| fragment_157.0125 | : 0.02 | fragment_158.0575 | : 0.01 |
| fragment_129.0175 | : 0.02 | loss_167.1775     | : 0.01 |
| fragment_133.0525 | : 0.02 | loss_64.0525      | : 0.01 |
| fragment_314.0825 | : 0.02 | loss_138.0875     | : 0.01 |
| loss_92.0475      | : 0.02 |                   |        |
| loss_109.0175     | : 0.01 |                   |        |
| loss_180.0975     | : 0.01 |                   |        |
| fragment_65.0375  | : 0.01 |                   |        |
| loss_92.0825      | : 0.01 |                   |        |



mb\_motif\_39.m2m

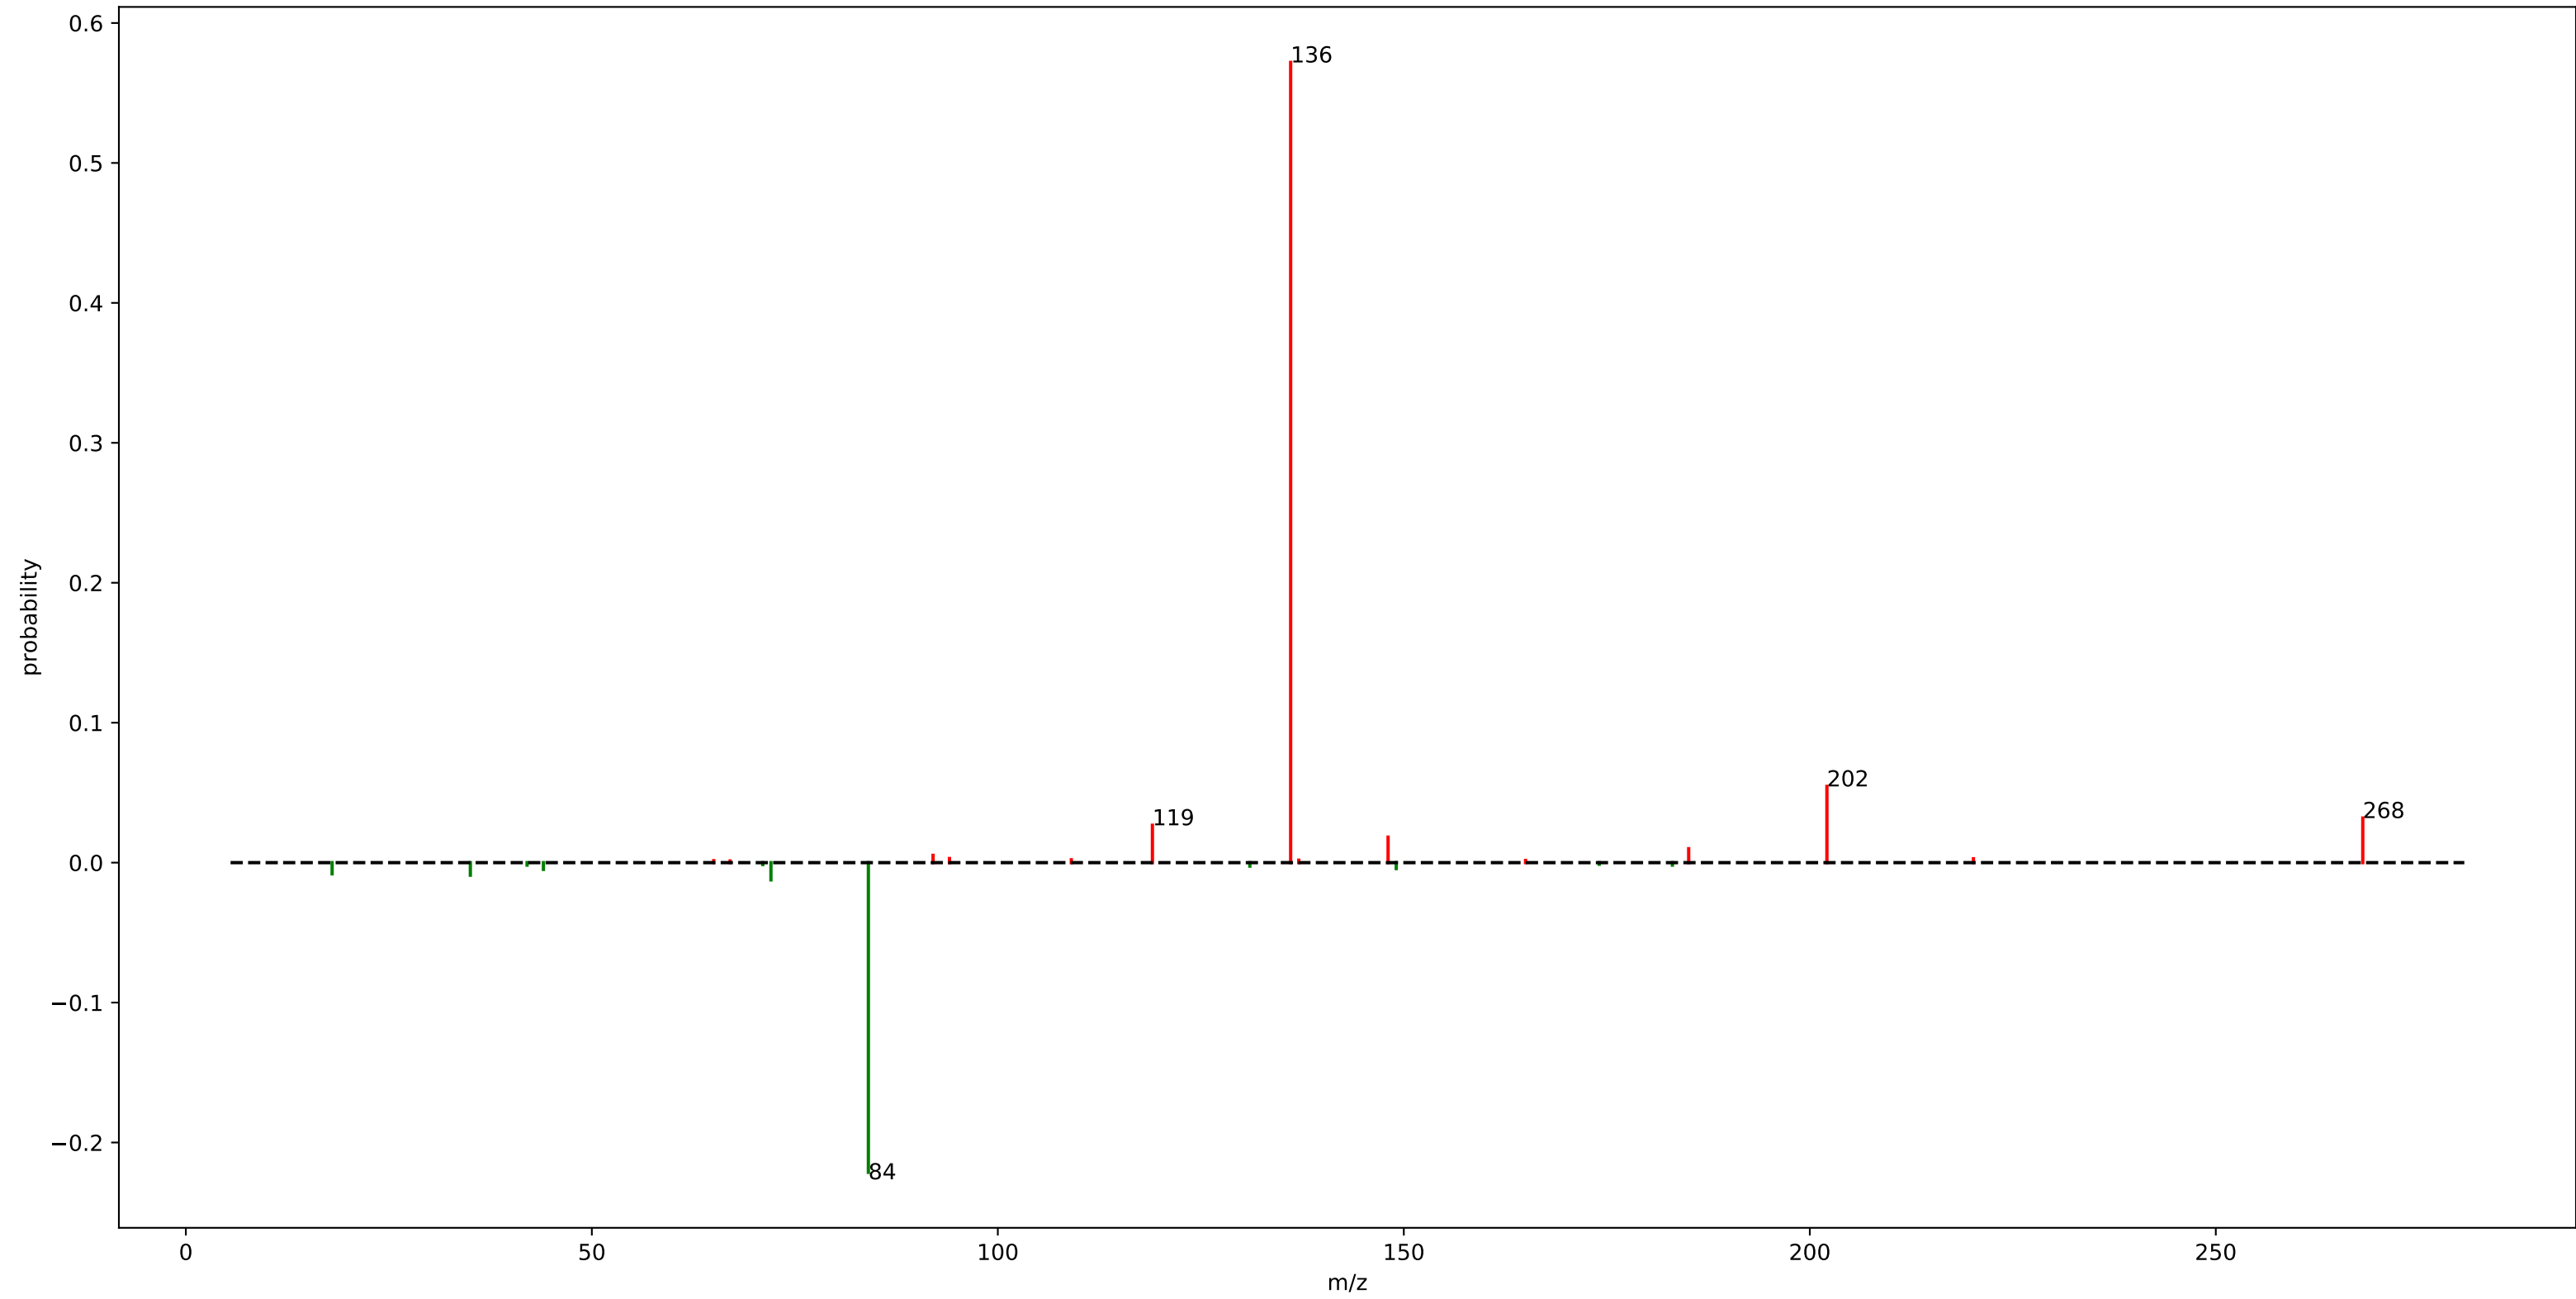

## mb\_motif\_39.m2m

|                   |        |
|-------------------|--------|
| fragment_136.0625 | : 0.57 |
| loss_84.0575      | : 0.22 |
| fragment_202.1075 | : 0.05 |
| fragment_268.1025 | : 0.03 |
| fragment_119.0375 | : 0.03 |
| fragment_148.0625 | : 0.02 |
| loss_72.0575      | : 0.01 |
| fragment_185.0825 | : 0.01 |
| loss_35.0375      | : 0.01 |
| loss_18.0125      | : 0.01 |
| fragment_92.0225  | : 0.01 |

gnps\_motif\_29.m2m

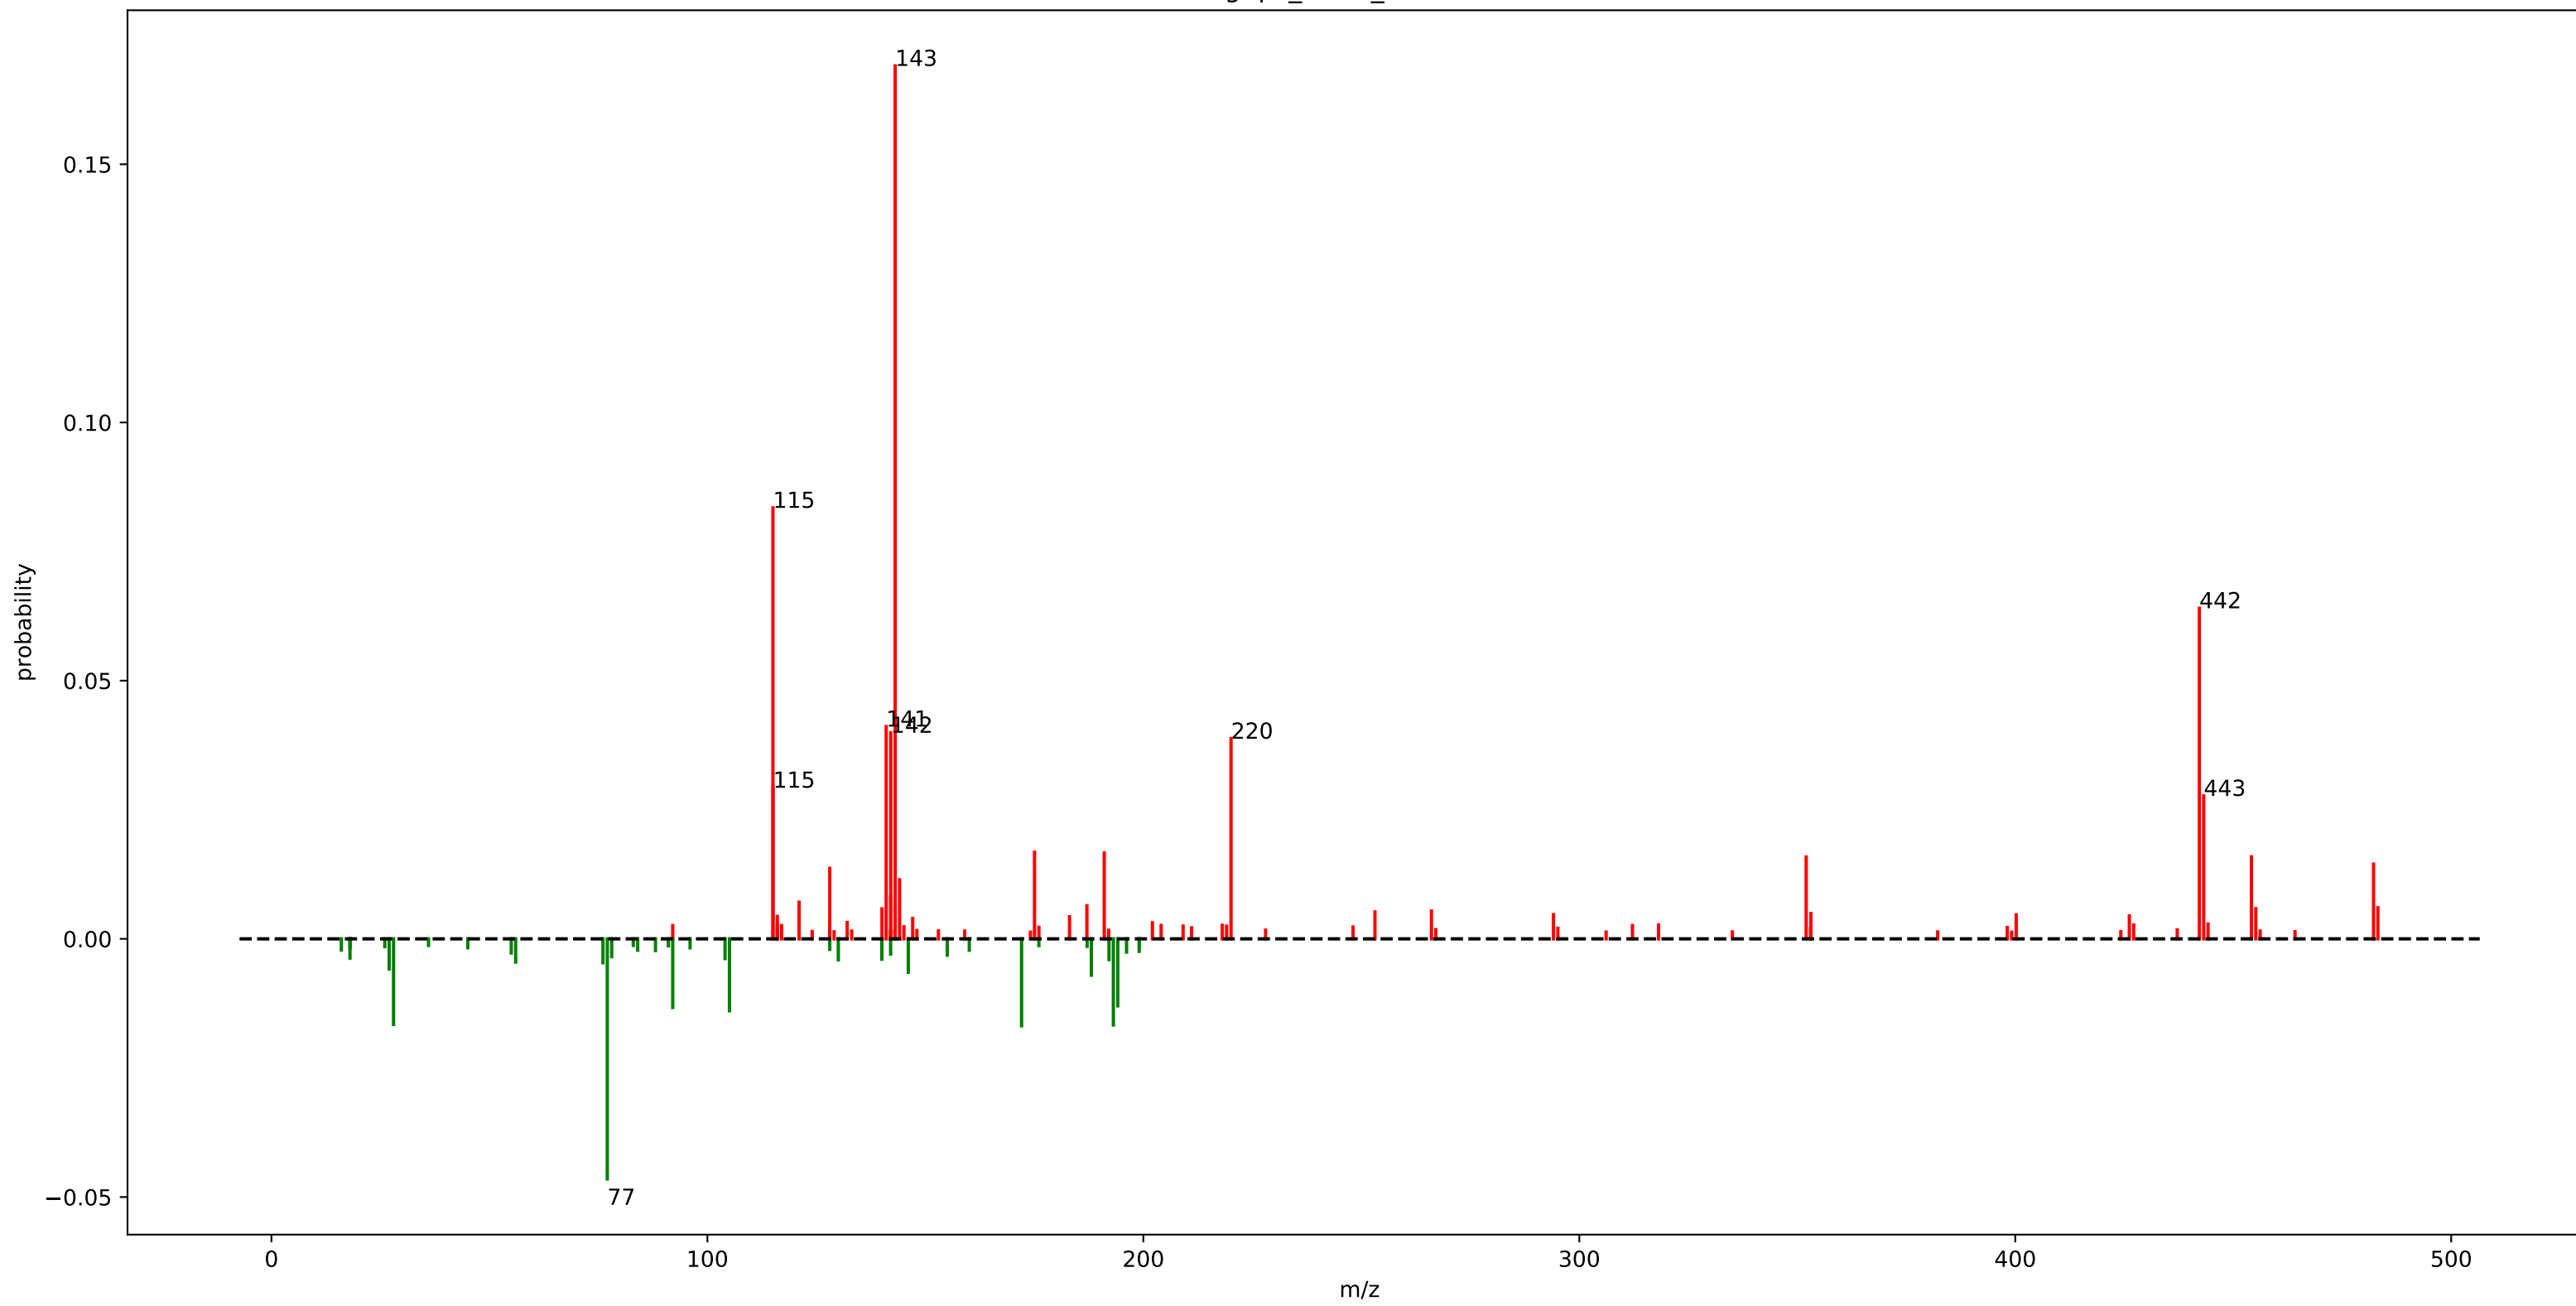

# gnps\_motif\_29.m2m

|                   |        |                   |        |
|-------------------|--------|-------------------|--------|
| fragment_143.0725 | : 0.17 | loss_194.1325     | : 0.01 |
| fragment_115.0325 | : 0.08 | fragment_144.0825 | : 0.01 |
| fragment_442.2225 | : 0.06 | fragment_142.0475 | : 0.01 |
| loss_77.0375      | : 0.05 | fragment_121.0275 | : 0.01 |
| fragment_141.0125 | : 0.04 | fragment_143.0625 | : 0.01 |
| fragment_142.0675 | : 0.04 | loss_188.0675     | : 0.01 |
| fragment_220.1125 | : 0.04 | loss_146.0825     | : 0.01 |
| fragment_115.0525 | : 0.03 | fragment_187.0525 | : 0.01 |
| fragment_443.2275 | : 0.03 | fragment_483.1825 | : 0.01 |
| loss_172.0625     | : 0.02 | loss_27.0025      | : 0.01 |
| fragment_175.0375 | : 0.02 | fragment_455.1775 | : 0.01 |
| loss_193.1225     | : 0.02 | fragment_140.0475 | : 0.01 |
| fragment_191.0325 | : 0.02 | fragment_266.0775 | : 0.01 |
| loss_28.0075      | : 0.02 | fragment_253.1225 | : 0.01 |
| fragment_454.1775 | : 0.02 |                   |        |
| fragment_352.0425 | : 0.02 |                   |        |
| fragment_482.1875 | : 0.01 |                   |        |
| loss_105.0575     | : 0.01 |                   |        |
| fragment_128.0625 | : 0.01 |                   |        |
| loss_92.0475      | : 0.01 |                   |        |

urine\_mass2motif\_260.m2m

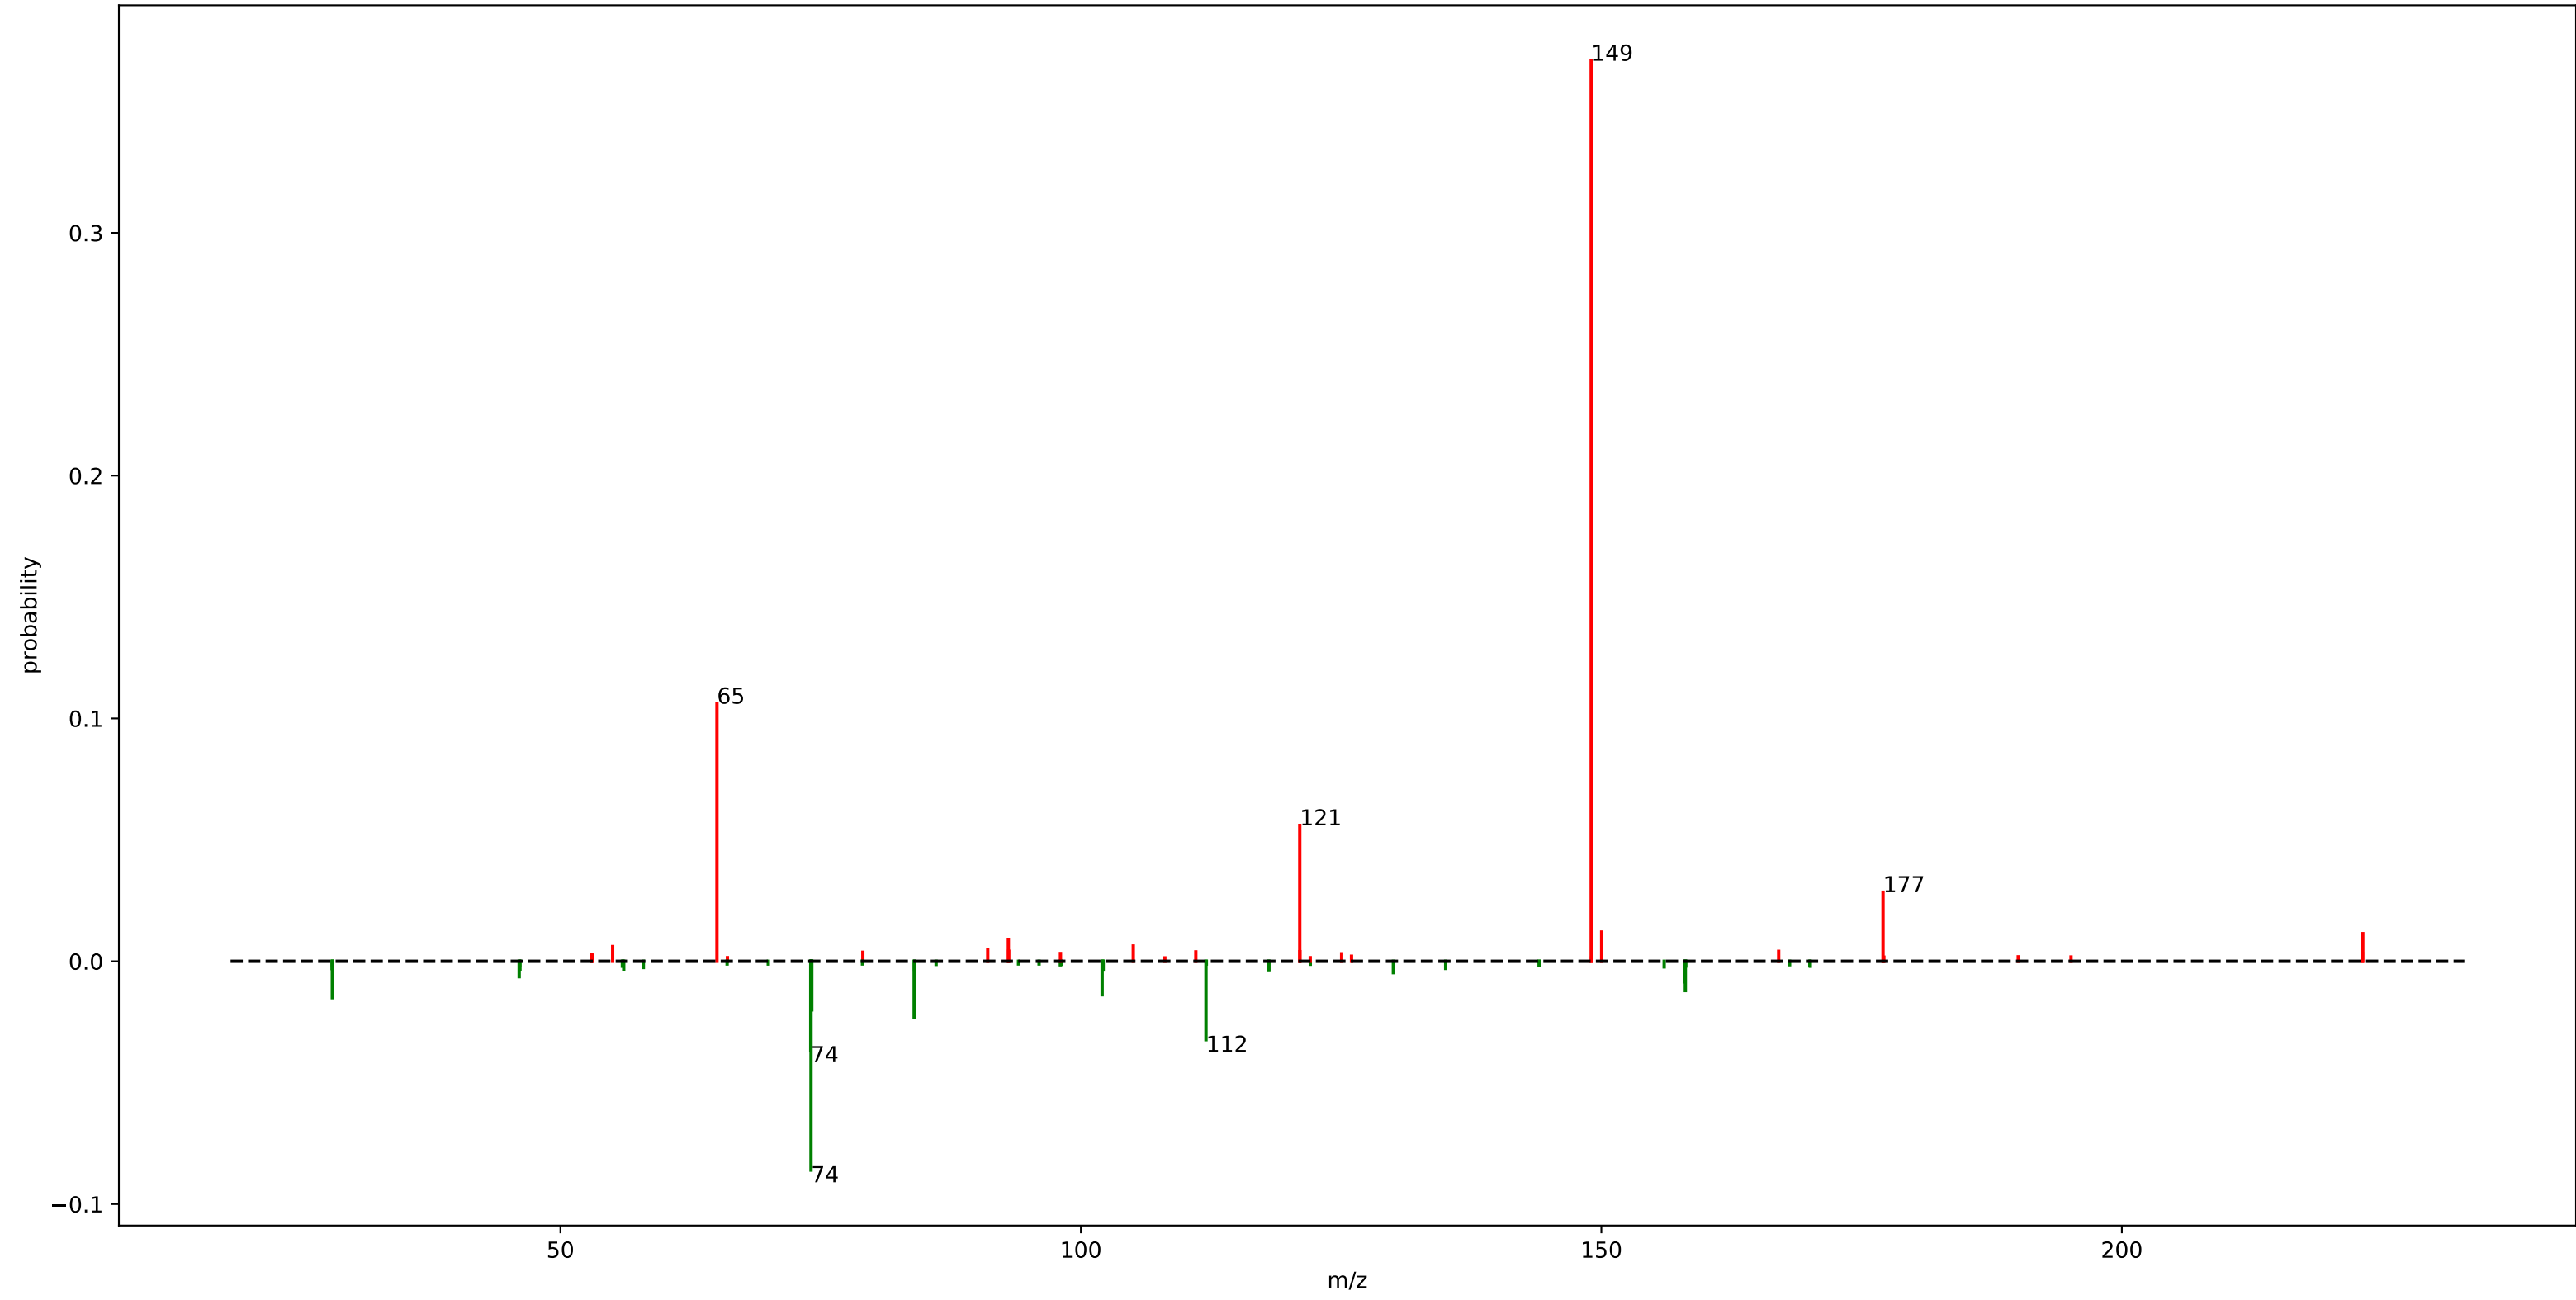

# urine\_mass2motif\_260.m2m

|                   |        |              |        |
|-------------------|--------|--------------|--------|
| fragment_149.0225 | : 0.37 | loss_74.1075 | : 0.01 |
| fragment_65.0375  | : 0.11 |              |        |
| loss_74.0725      | : 0.09 |              |        |
| fragment_121.0275 | : 0.06 |              |        |
| loss_74.0475      | : 0.04 |              |        |
| loss_112.0175     | : 0.03 |              |        |
| fragment_177.0575 | : 0.03 |              |        |
| loss_83.9825      | : 0.02 |              |        |
| loss_74.1475      | : 0.02 |              |        |
| loss_28.0875      | : 0.01 |              |        |
| loss_102.0425     | : 0.01 |              |        |
| loss_158.0675     | : 0.01 |              |        |
| fragment_150.0275 | : 0.01 |              |        |
| fragment_223.1475 | : 0.01 |              |        |
| loss_74.1225      | : 0.01 |              |        |
| fragment_93.0325  | : 0.01 |              |        |
| loss_158.0375     | : 0.01 |              |        |
| loss_46.0375      | : 0.01 |              |        |
| fragment_105.0325 | : 0.01 |              |        |
| fragment_55.0175  | : 0.01 |              |        |

gnps\_motif\_68.m2m

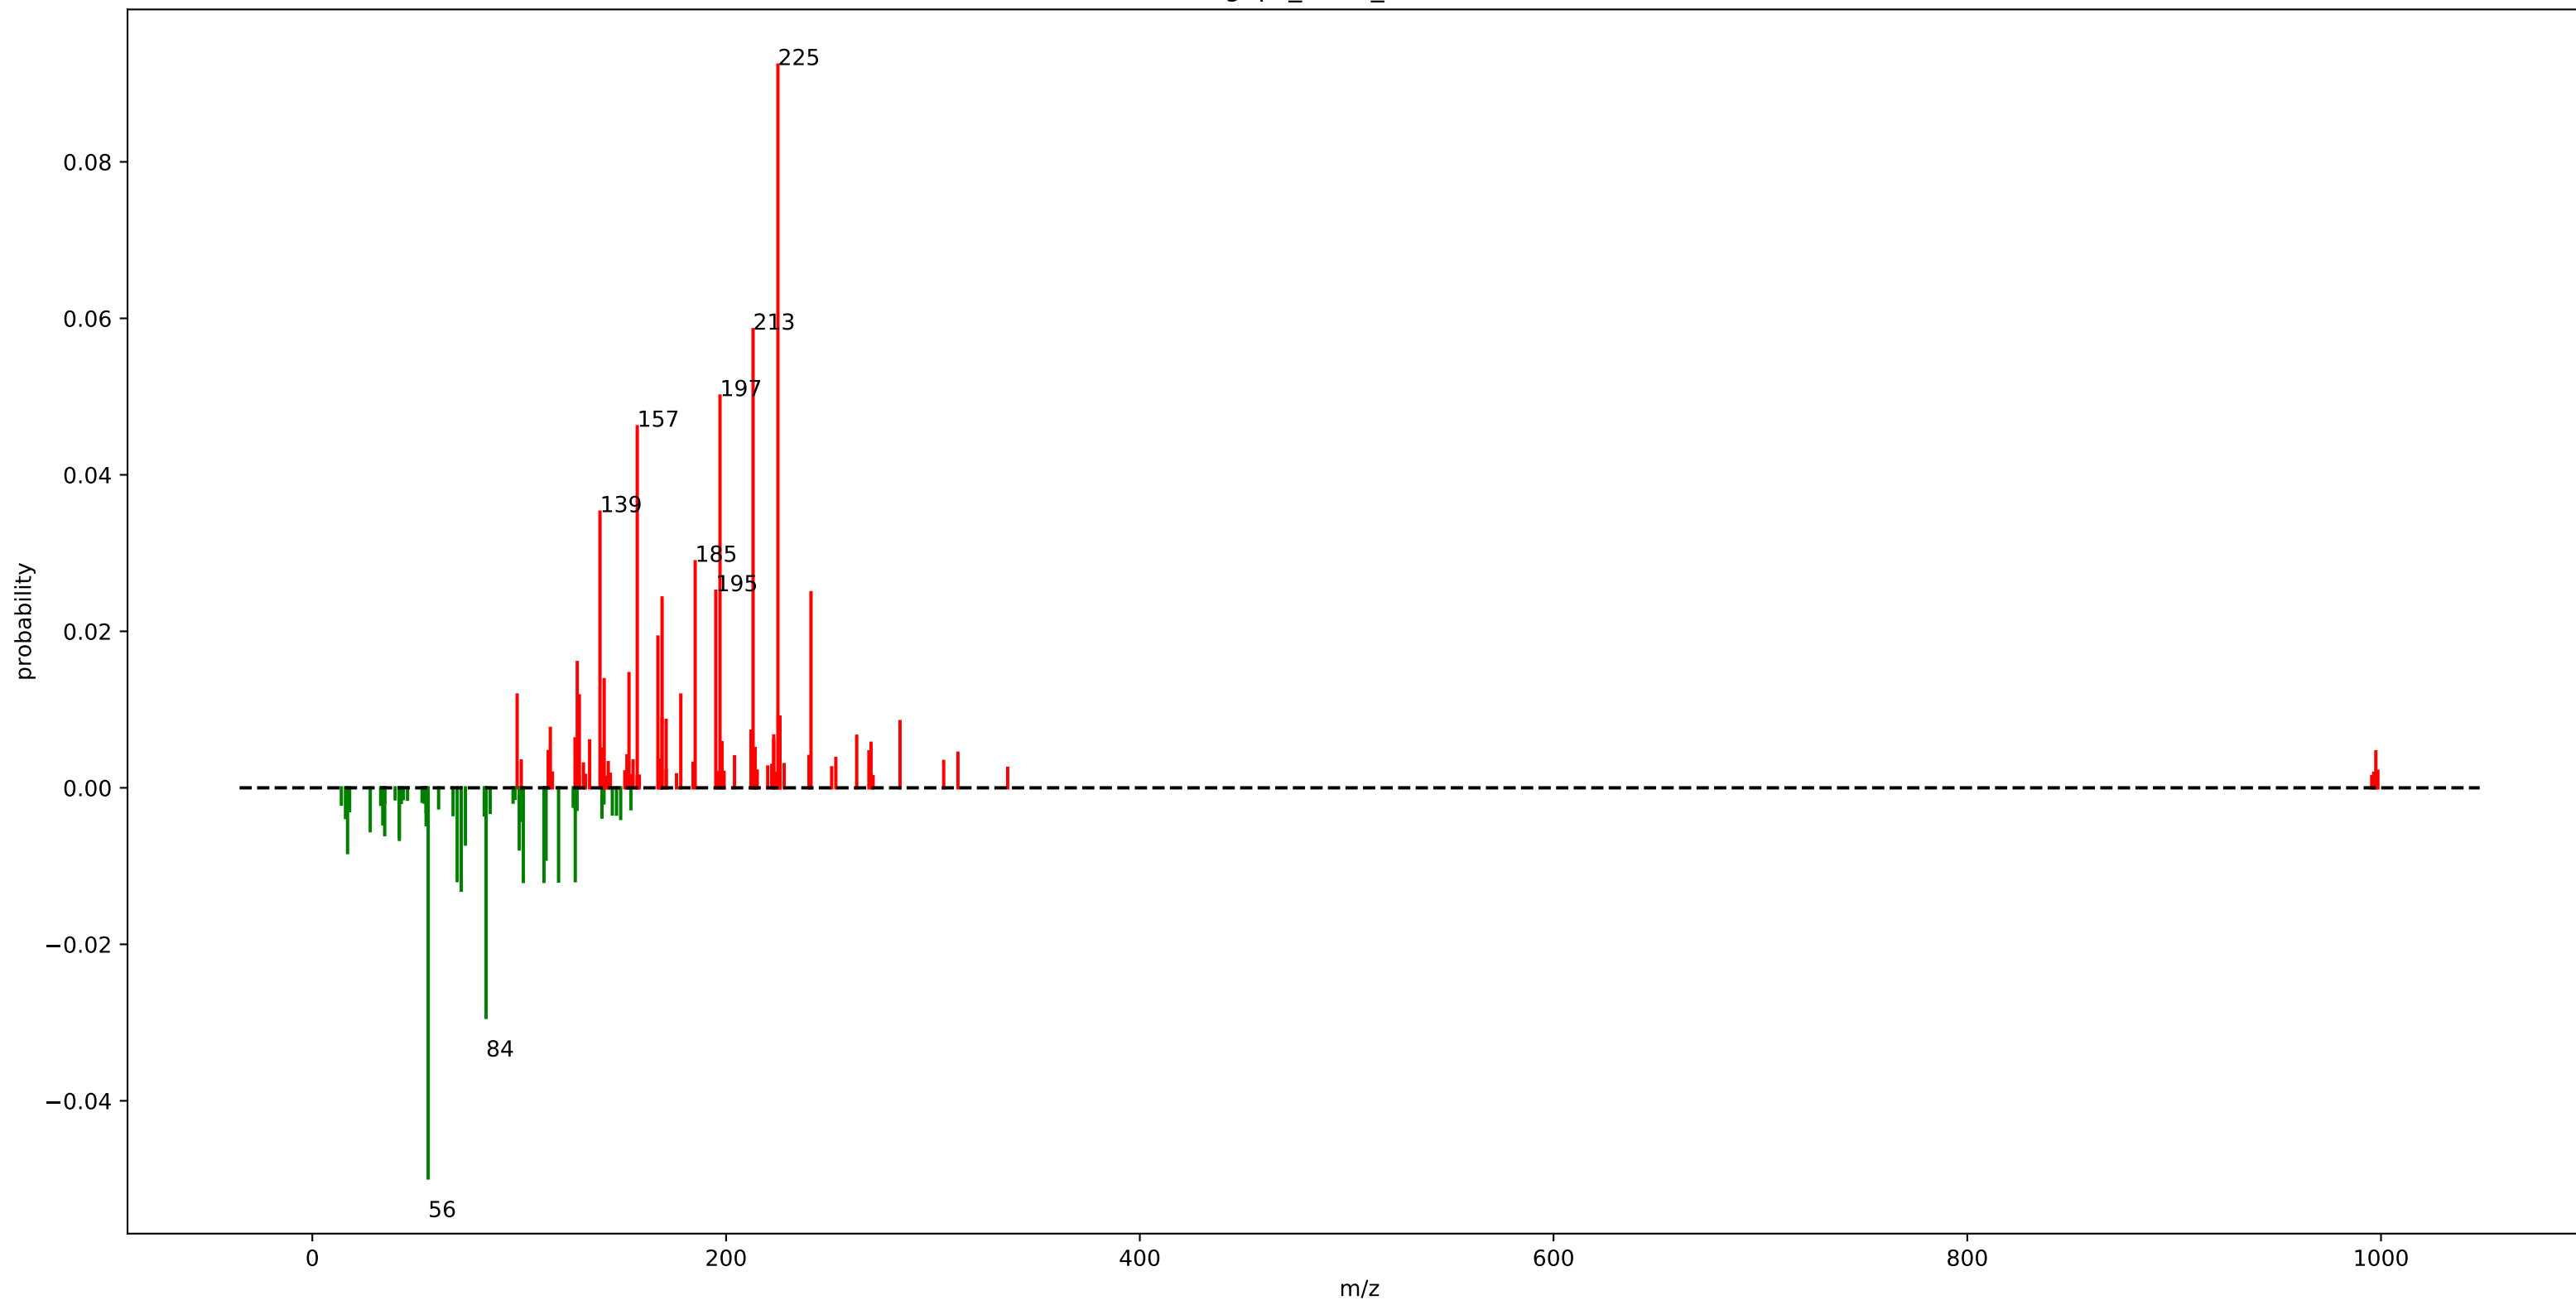

# gnps\_motif\_68.m2m

|                   |        |                   |        |                   |        |
|-------------------|--------|-------------------|--------|-------------------|--------|
| fragment_225.0525 | : 0.09 | loss_70.0175      | : 0.01 | loss_34.9675      | : 0.01 |
| fragment_213.0525 | : 0.06 | fragment_99.0025  | : 0.01 | fragment_134.0475 | : 0.01 |
| fragment_197.0575 | : 0.05 | fragment_178.0975 | : 0.01 | fragment_198.0675 | : 0.01 |
| loss_55.9875      | : 0.05 | fragment_129.0675 | : 0.01 | fragment_270.0775 | : 0.01 |
| fragment_157.0625 | : 0.05 | loss_112.9875     | : 0.01 | loss_27.9925      | : 0.01 |
| fragment_139.0525 | : 0.04 | fragment_226.0575 | : 0.01 | fragment_214.0625 | : 0.01 |
| loss_83.9875      | : 0.03 | fragment_169.0175 | : 0.01 |                   |        |
| fragment_185.0575 | : 0.03 | fragment_171.0425 | : 0.01 |                   |        |
| fragment_195.0425 | : 0.03 | fragment_284.0925 | : 0.01 |                   |        |
| fragment_241.0475 | : 0.02 | loss_17.0225      | : 0.01 |                   |        |
| fragment_169.0625 | : 0.02 | loss_100.0175     | : 0.01 |                   |        |
| fragment_167.0475 | : 0.02 | fragment_115.0525 | : 0.01 |                   |        |
| fragment_128.0625 | : 0.02 | fragment_212.0475 | : 0.01 |                   |        |
| fragment_153.0675 | : 0.01 | loss_74.0025      | : 0.01 |                   |        |
| fragment_141.0675 | : 0.01 | fragment_223.0525 | : 0.01 |                   |        |
| loss_71.9825      | : 0.01 | fragment_263.1525 | : 0.01 |                   |        |
| loss_101.9975     | : 0.01 | loss_42.0475      | : 0.01 |                   |        |
| loss_111.9775     | : 0.01 | loss_42.0225      | : 0.01 |                   |        |
| loss_119.0375     | : 0.01 | fragment_126.9975 | : 0.01 |                   |        |
| loss_127.0975     | : 0.01 | fragment_223.0475 | : 0.01 |                   |        |



StrepSalini\_motif\_37.m2m

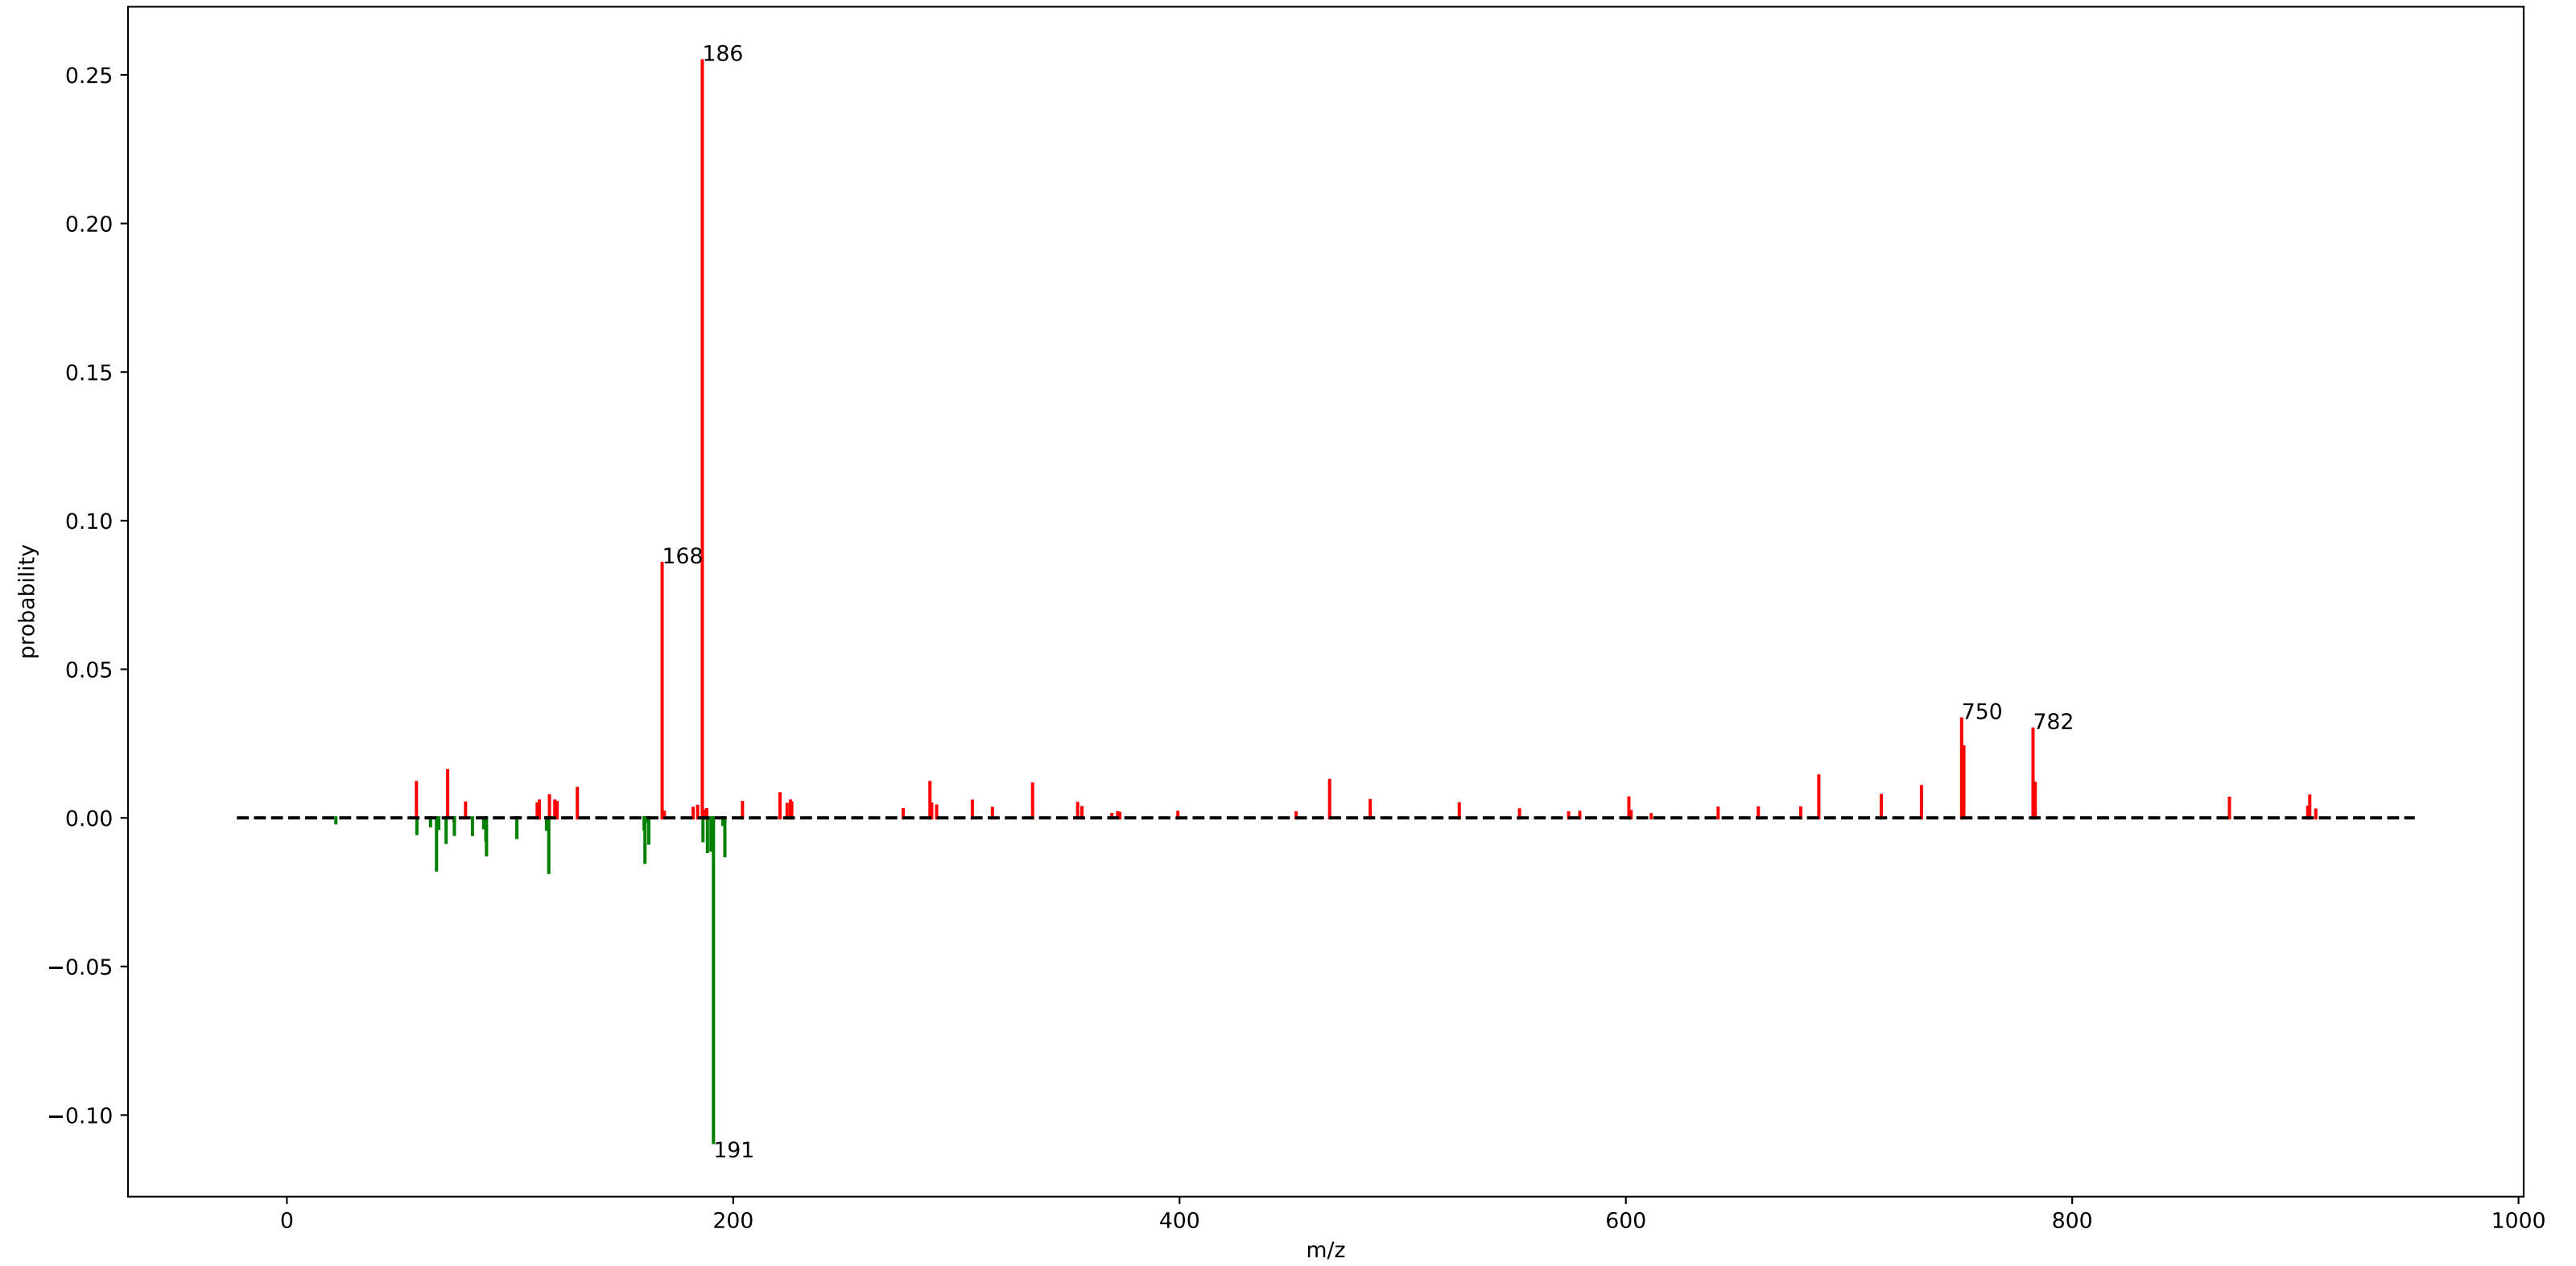

# StrepSalini\_motif\_37.m2m

|                   |        |                   |        |                   |        |
|-------------------|--------|-------------------|--------|-------------------|--------|
| fragment_186.1500 | : 0.25 | fragment_732.4500 | : 0.01 | loss_58.2500      | : 0.01 |
| loss_191.1525     | : 0.11 | fragment_130.1500 | : 0.01 | fragment_204.1500 | : 0.01 |
| fragment_168.1500 | : 0.09 | loss_162.1500     | : 0.01 | fragment_121.0525 | : 0.01 |
| fragment_750.4500 | : 0.03 | loss_71.3500      | : 0.01 | fragment_226.2500 | : 0.01 |
| fragment_782.4500 | : 0.03 | fragment_220.9500 | : 0.01 |                   |        |
| fragment_751.4500 | : 0.02 | loss_186.4500     | : 0.01 |                   |        |
| loss_117.3500     | : 0.02 | fragment_714.4500 | : 0.01 |                   |        |
| loss_67.0500      | : 0.02 | loss_89.1500      | : 0.01 |                   |        |
| fragment_72.0500  | : 0.02 | fragment_117.6500 | : 0.01 |                   |        |
| loss_160.4500     | : 0.01 | fragment_906.4500 | : 0.01 |                   |        |
| fragment_686.4500 | : 0.01 | fragment_601.3500 | : 0.01 |                   |        |
| loss_196.2525     | : 0.01 | loss_103.0500     | : 0.01 |                   |        |
| fragment_467.2500 | : 0.01 | fragment_870.4500 | : 0.01 |                   |        |
| loss_89.4500      | : 0.01 | fragment_485.4500 | : 0.01 |                   |        |
| fragment_288.1500 | : 0.01 | fragment_120.0500 | : 0.01 |                   |        |
| fragment_58.0500  | : 0.01 | fragment_113.1500 | : 0.01 |                   |        |
| fragment_783.4500 | : 0.01 | fragment_225.6500 | : 0.01 |                   |        |
| fragment_334.1500 | : 0.01 | loss_83.1500      | : 0.01 |                   |        |
| loss_188.4500     | : 0.01 | fragment_307.1500 | : 0.01 |                   |        |
| loss_190.0500     | : 0.01 | loss_75.0475      | : 0.01 |                   |        |

euphorbia\_motif\_249.m2m

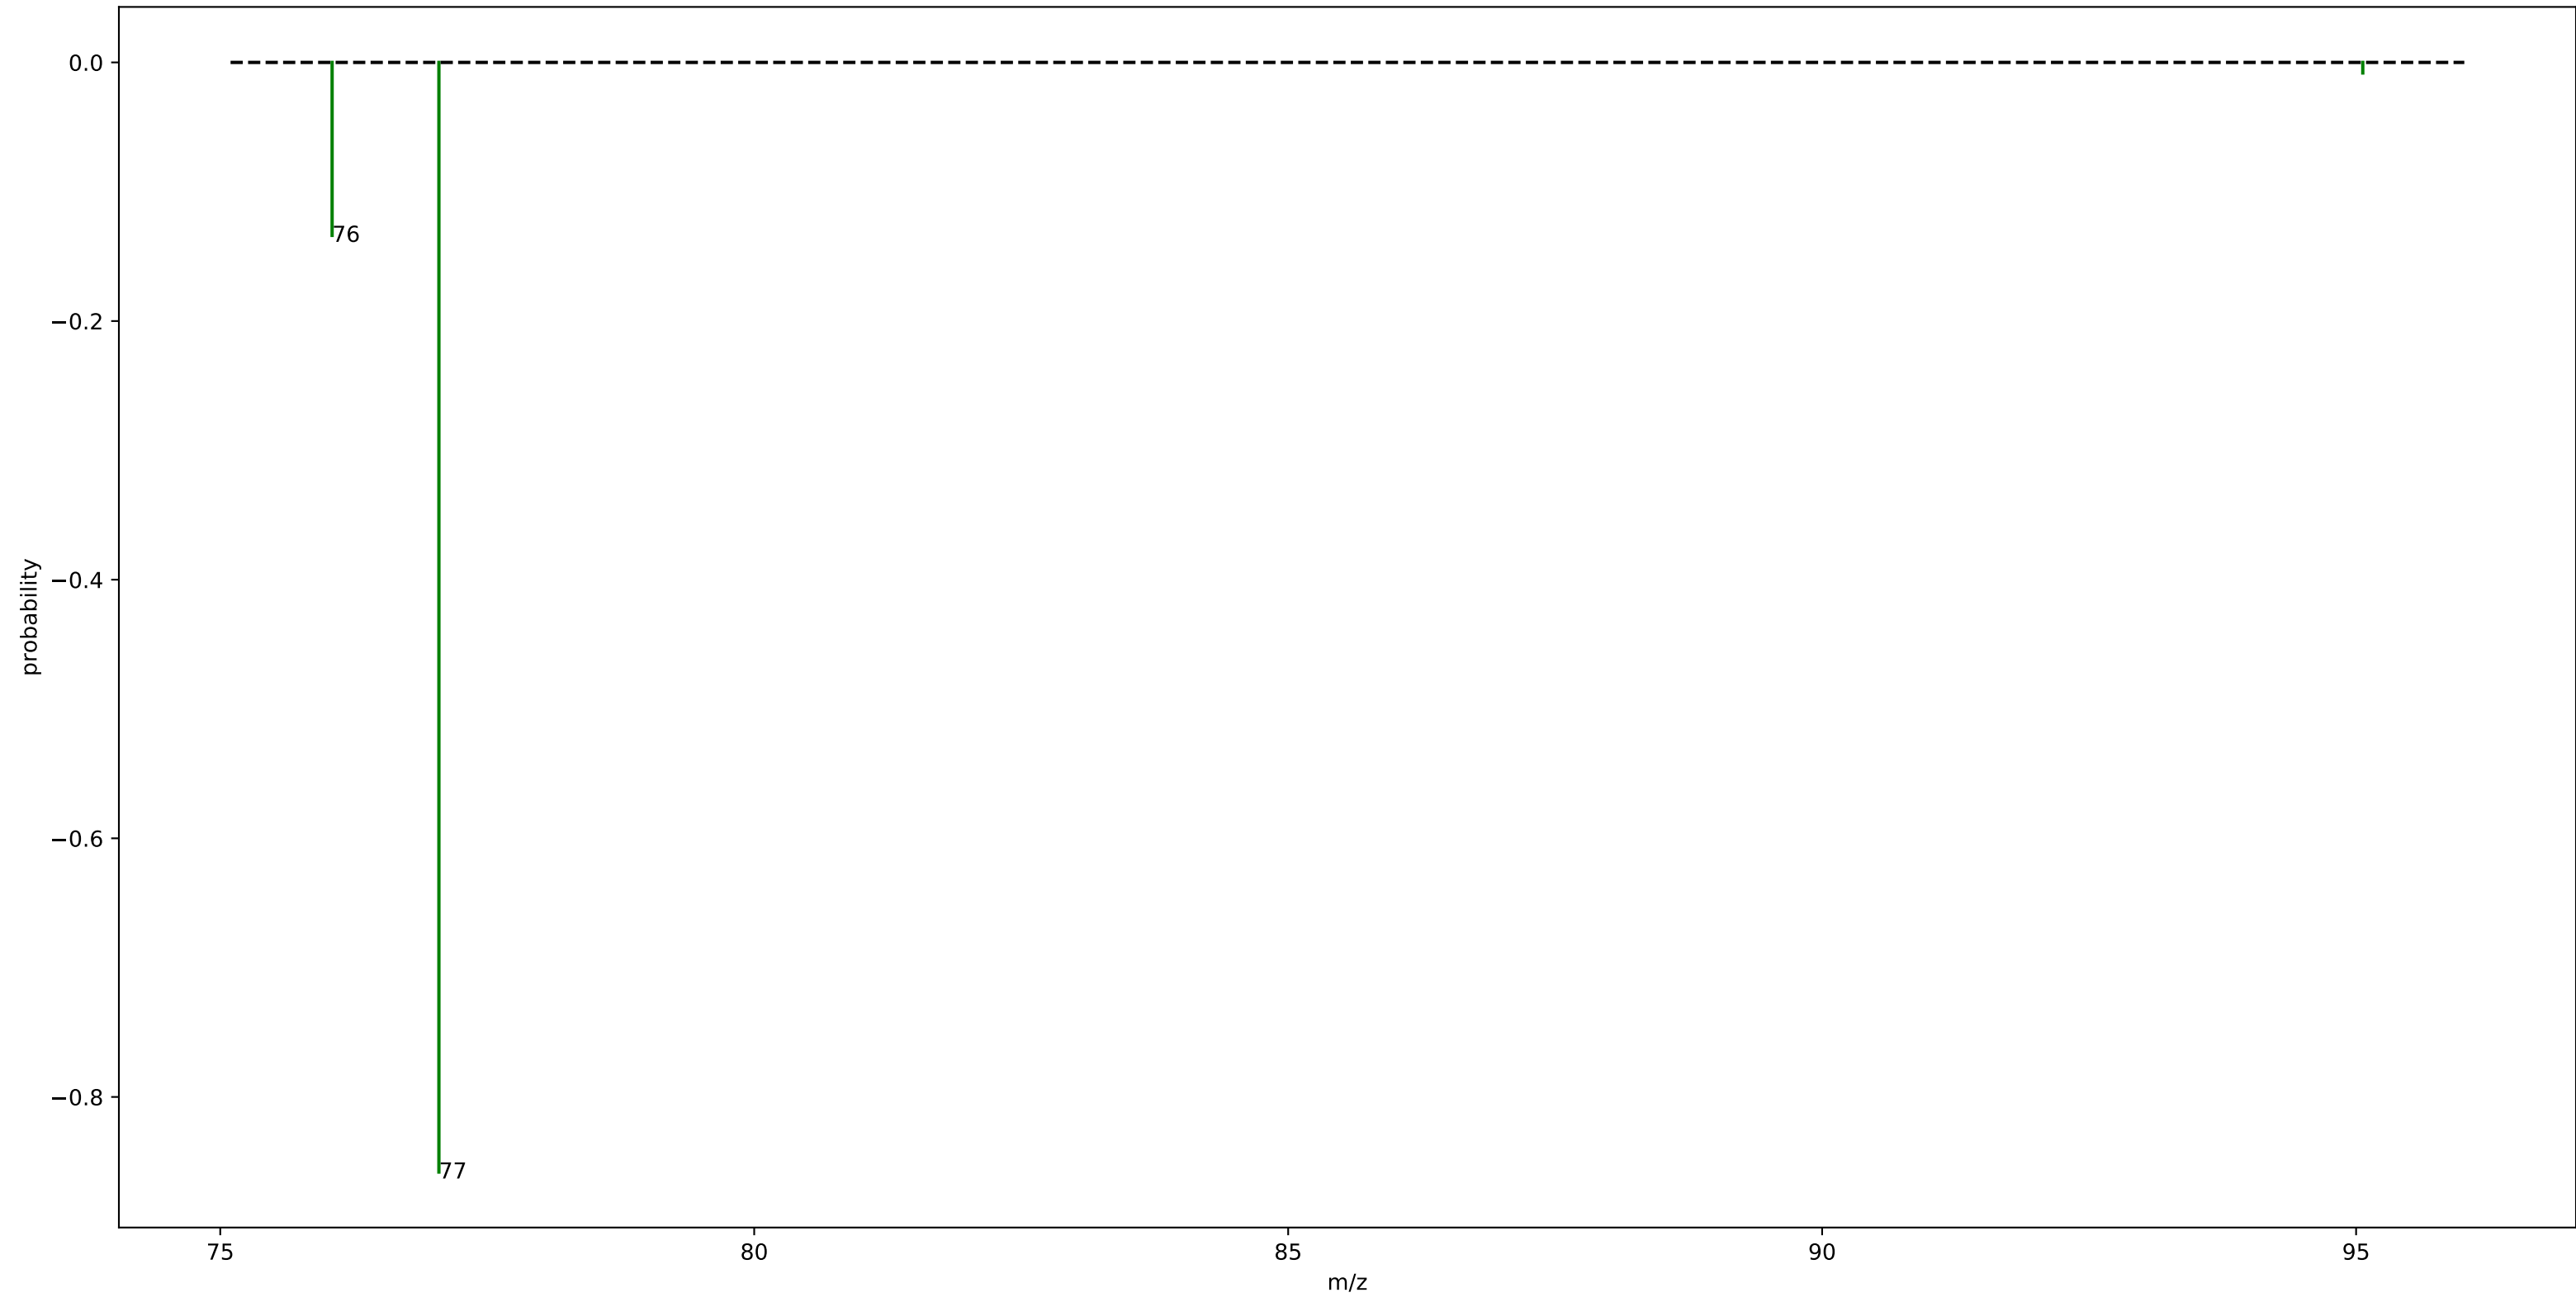

# euphorbia\_motif\_249.m2m

|              |        |
|--------------|--------|
| loss_77.0475 | : 0.86 |
| loss_76.0475 | : 0.13 |
| loss_95.0625 | : 0.01 |

StrepSalini\_motif\_119.m2m

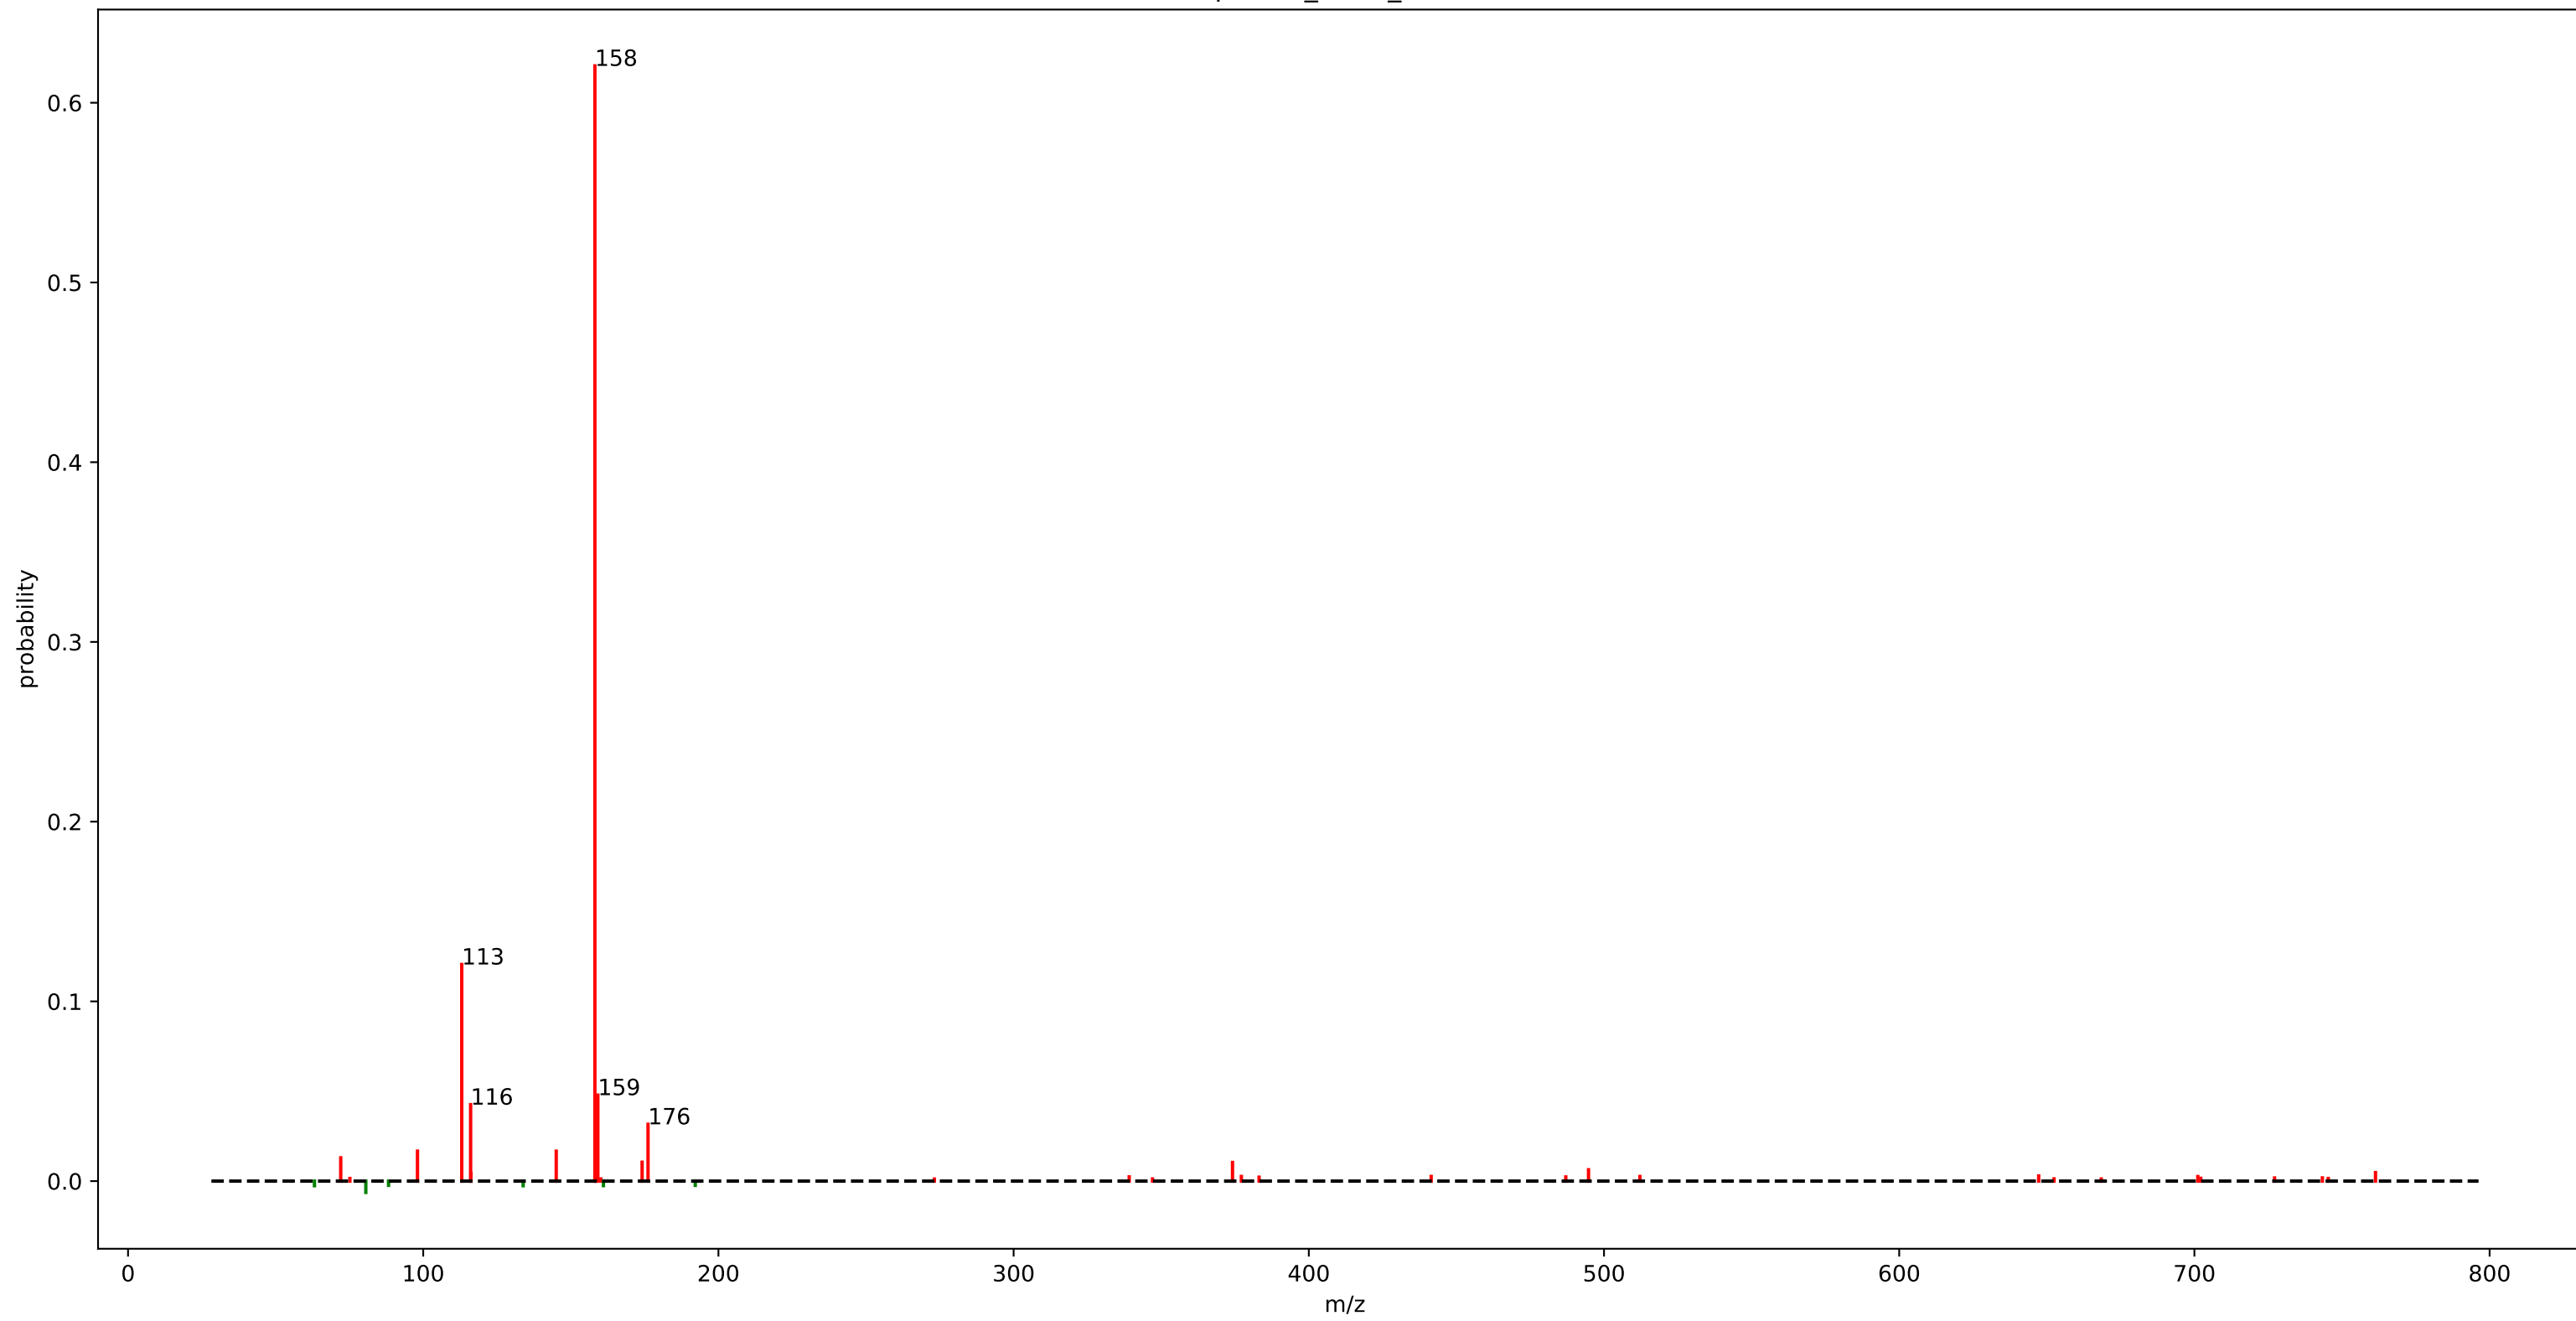

## StrepSalini\_motif\_119.m2m

|                   |        |
|-------------------|--------|
| fragment_158.1500 | : 0.62 |
| fragment_113.0500 | : 0.12 |
| fragment_159.1500 | : 0.05 |
| fragment_116.0525 | : 0.04 |
| fragment_176.1500 | : 0.03 |
| fragment_98.0500  | : 0.02 |
| fragment_145.0500 | : 0.02 |
| fragment_72.0500  | : 0.01 |
| fragment_174.1500 | : 0.01 |
| fragment_374.1500 | : 0.01 |
| fragment_494.7500 | : 0.01 |
| loss_80.5500      | : 0.01 |

urine\_mass2motif\_30.m2m

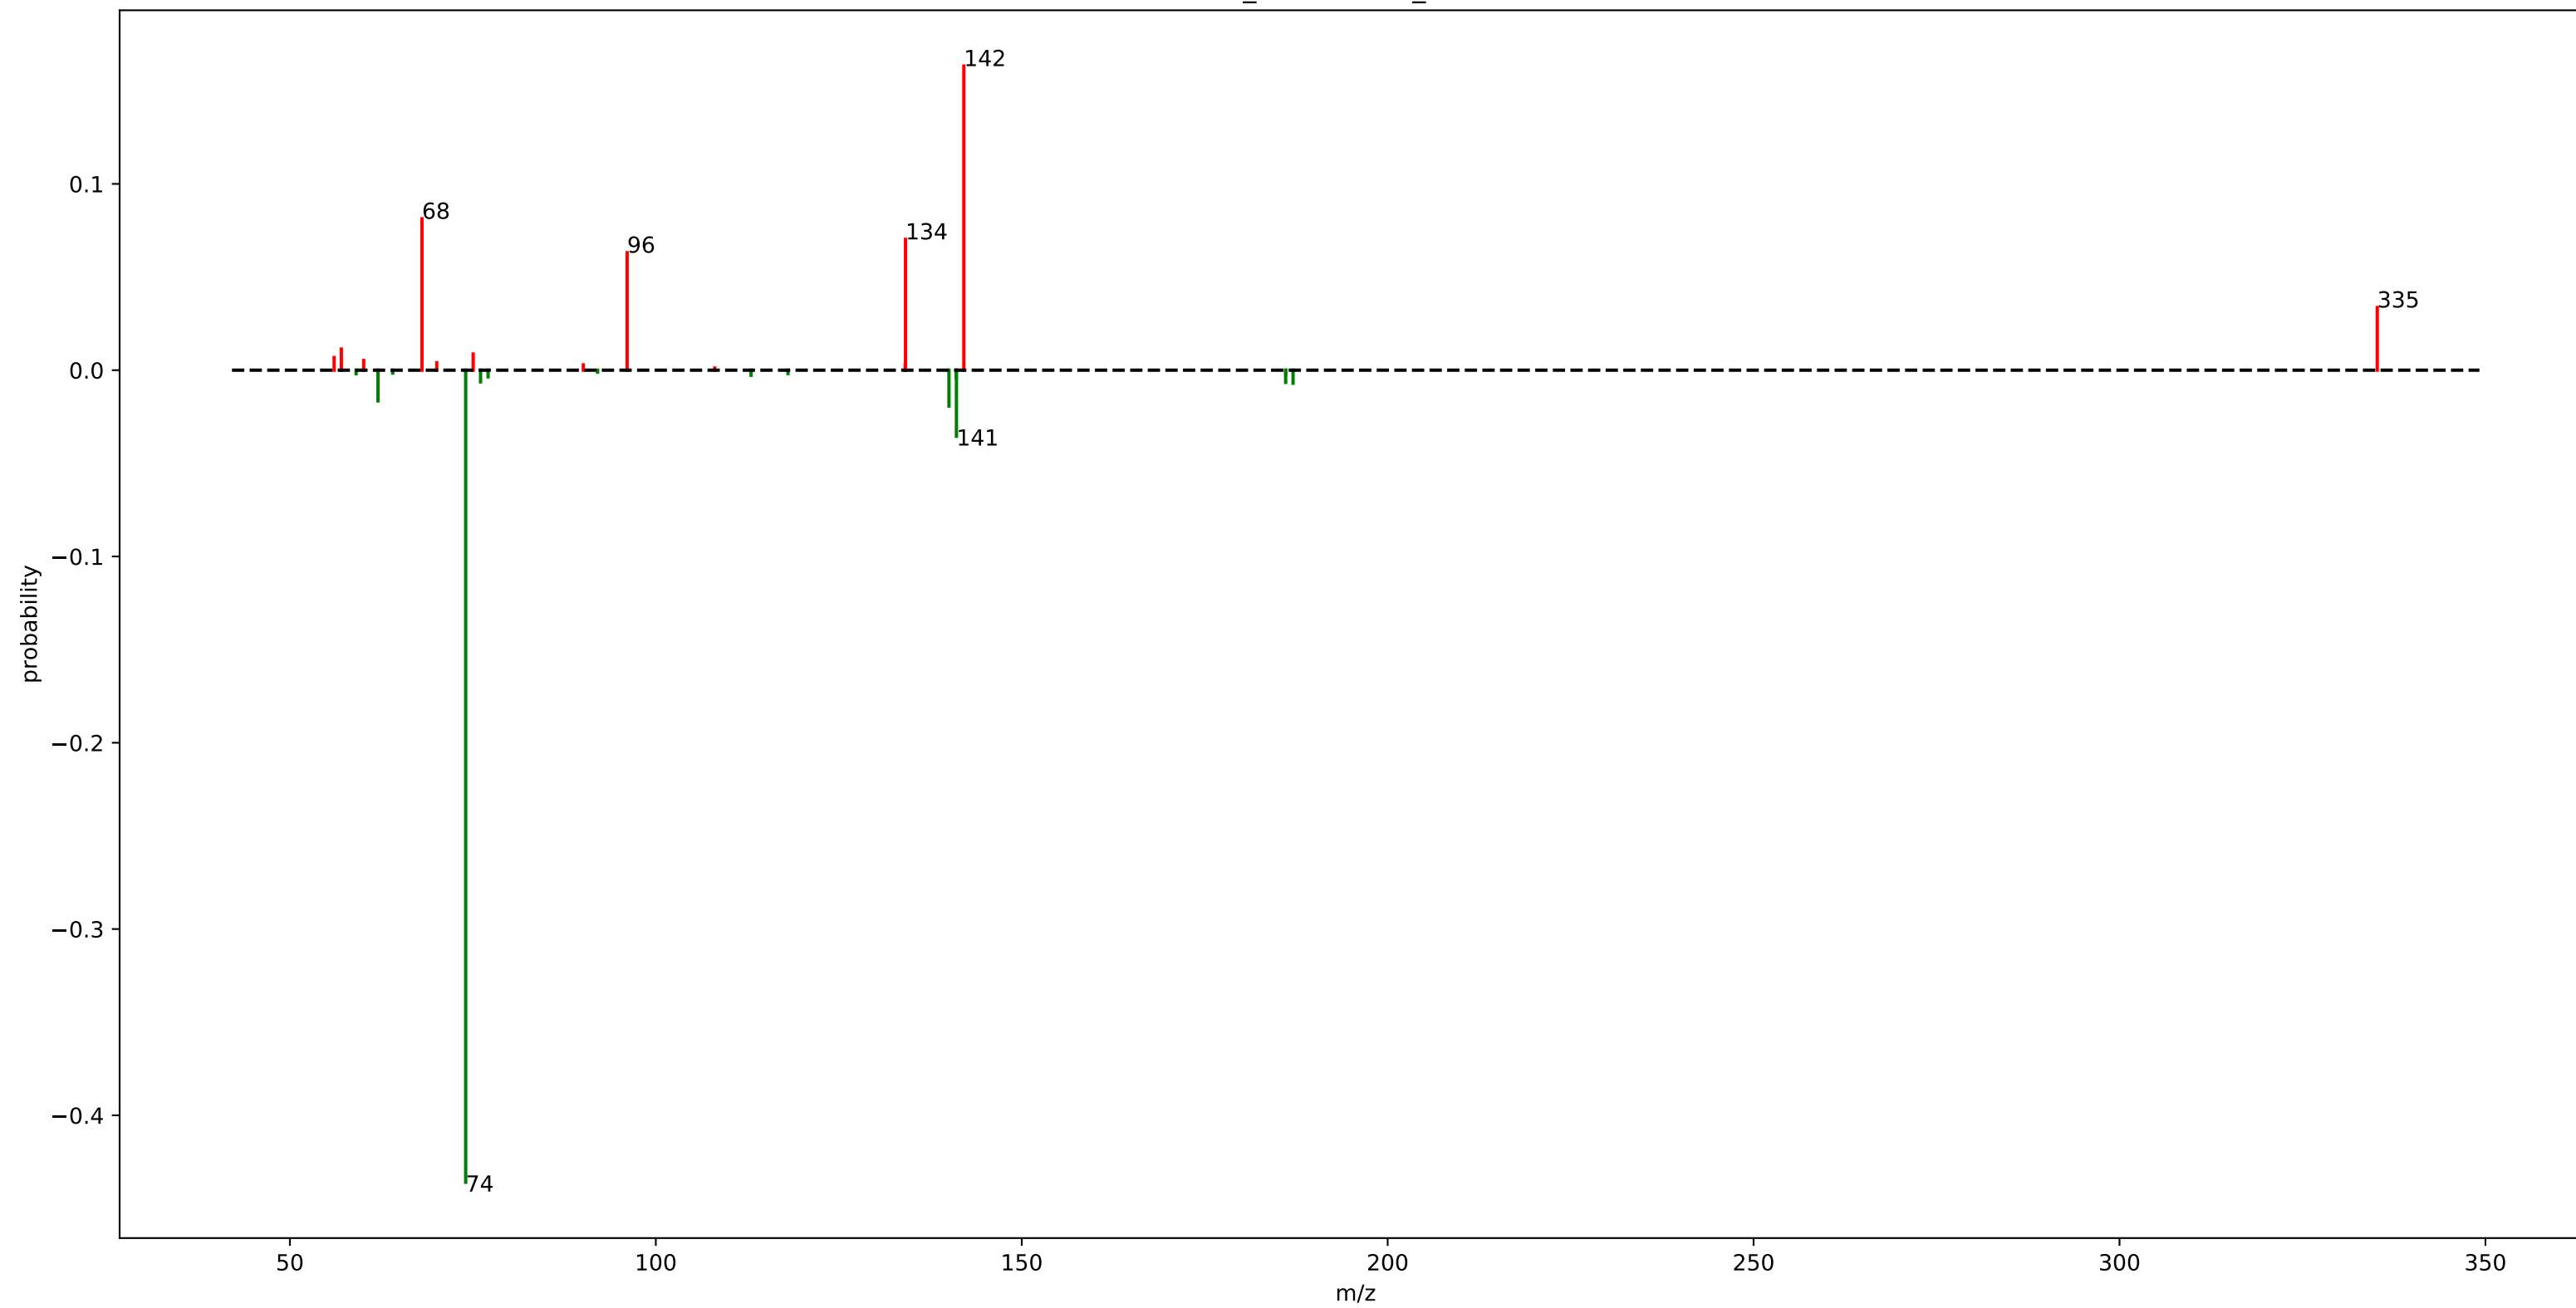

## urine\_mass2motif\_30.m2m

|                   |        |
|-------------------|--------|
| loss_74.0225      | : 0.44 |
| fragment_142.0875 | : 0.16 |
| fragment_68.0475  | : 0.08 |
| fragment_134.1175 | : 0.07 |
| fragment_96.0825  | : 0.06 |
| loss_141.0775     | : 0.04 |
| fragment_335.2175 | : 0.03 |
| loss_140.0575     | : 0.02 |
| loss_62.0375      | : 0.02 |
| fragment_57.0325  | : 0.01 |
| fragment_75.0425  | : 0.01 |
| loss_187.0725     | : 0.01 |
| fragment_56.0475  | : 0.01 |
| loss_186.0625     | : 0.01 |
| loss_76.0525      | : 0.01 |
| fragment_60.0825  | : 0.01 |



rhabdus\_motif\_8.m2m

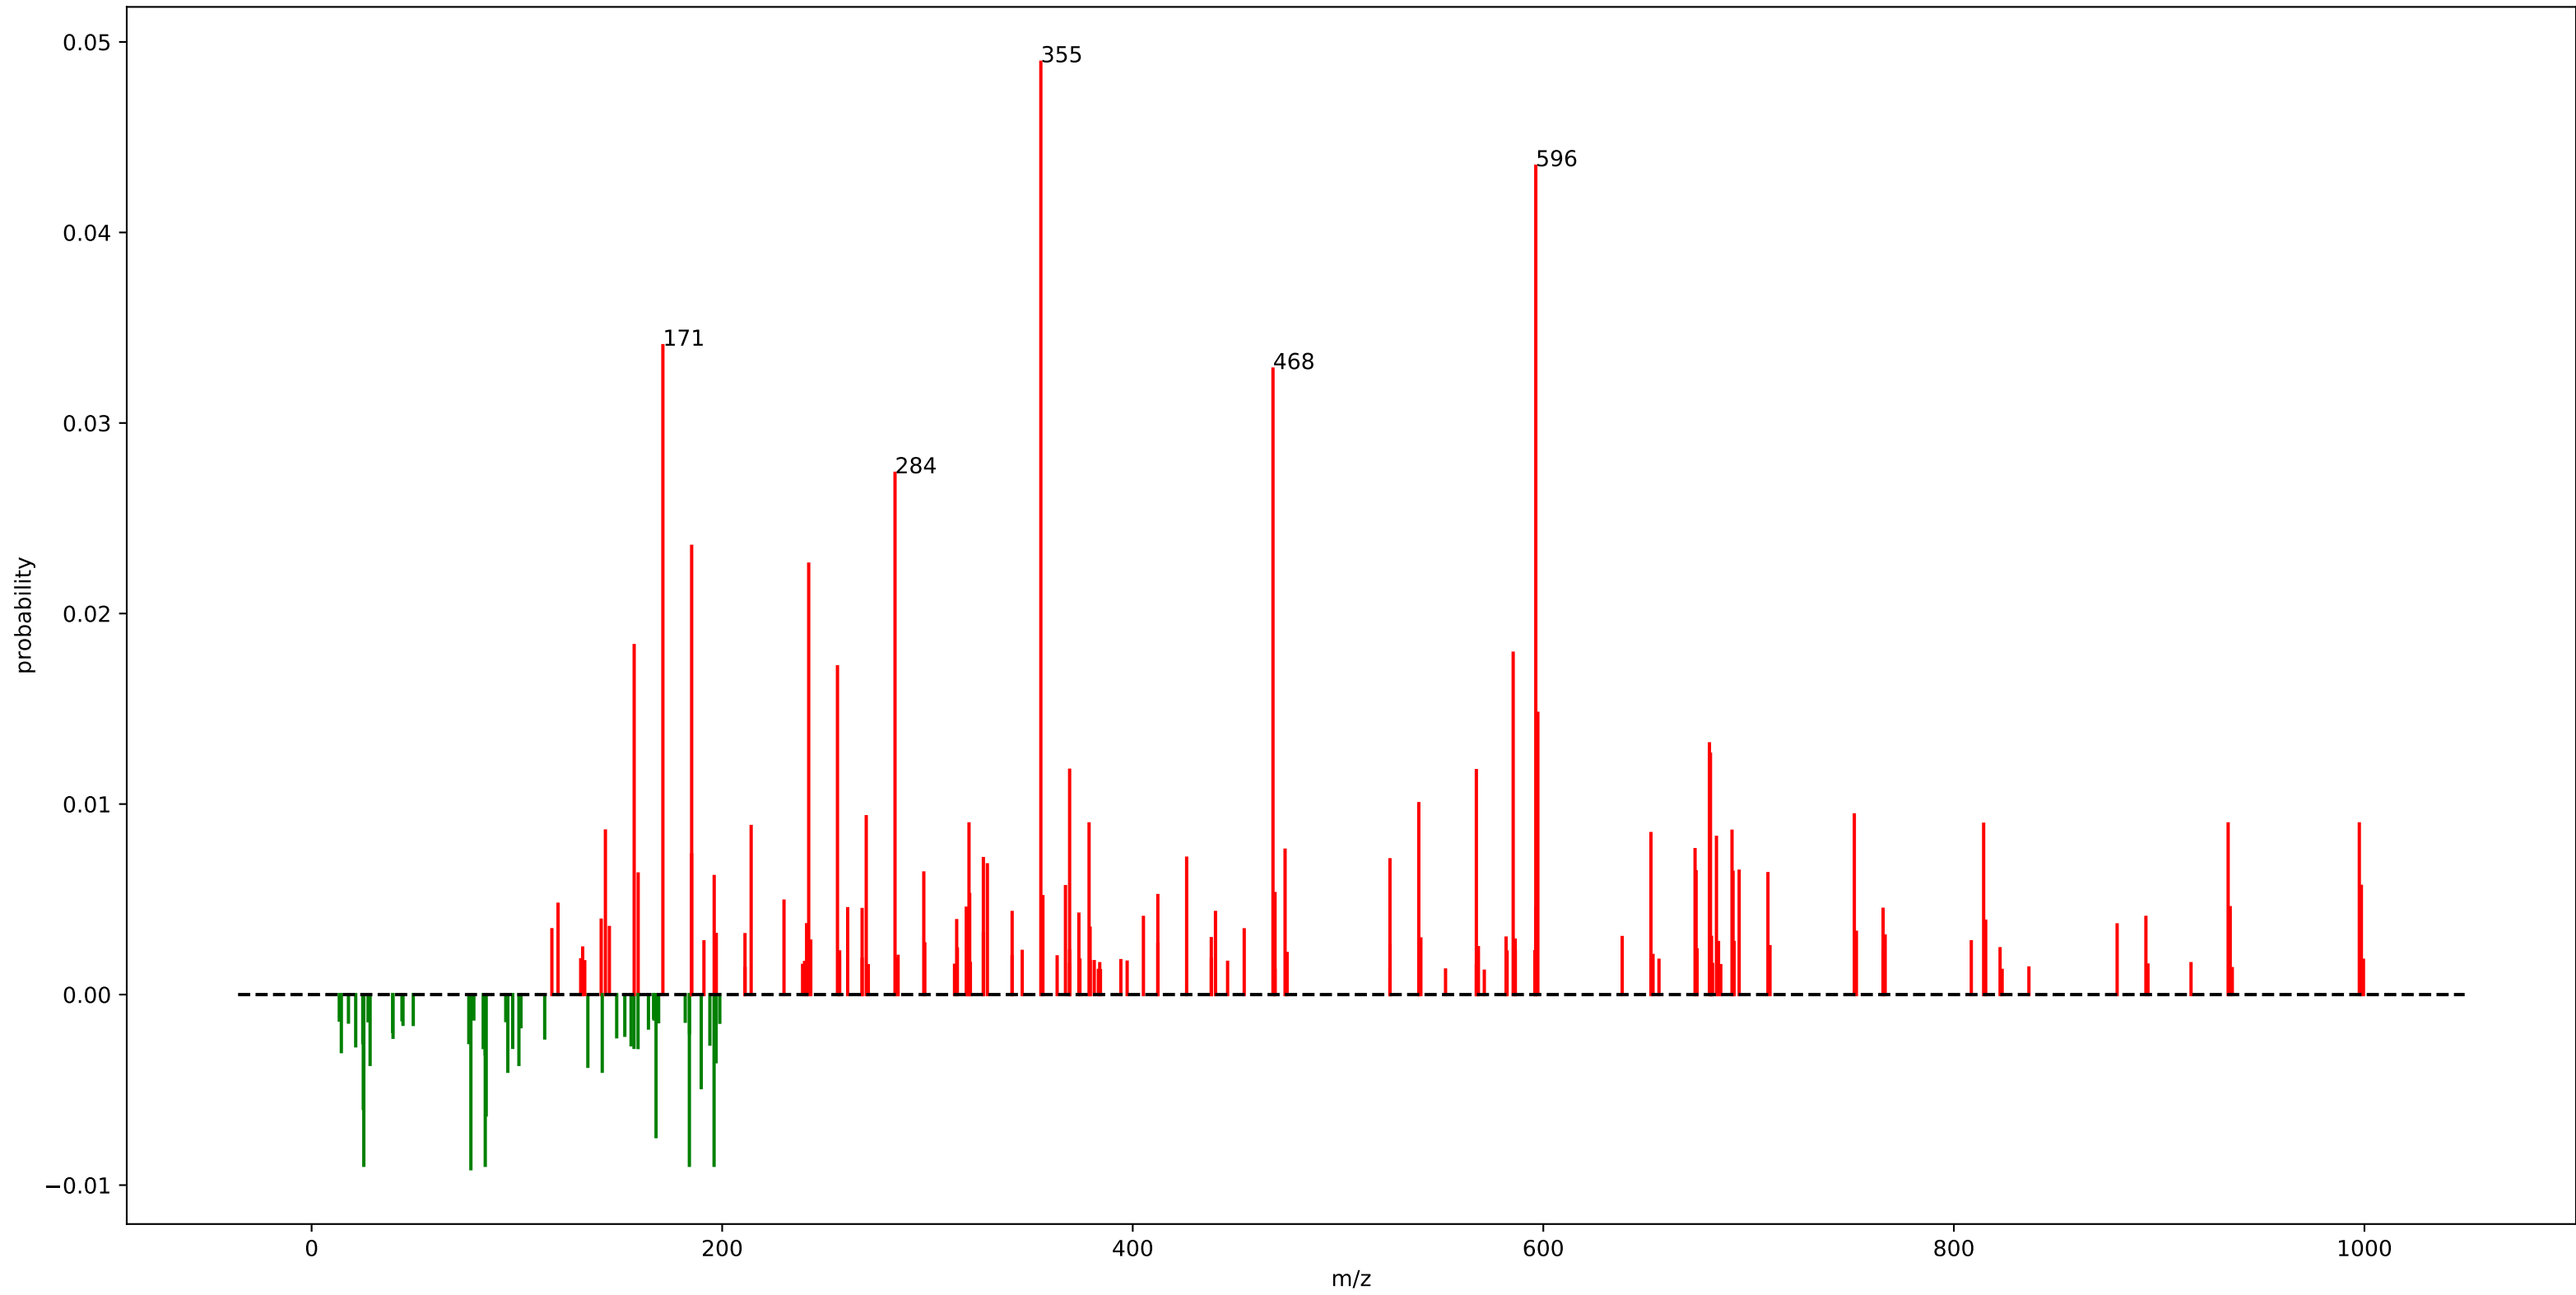

# rhabdus\_motif\_8.m2m

|                   |        |                   |        |                   |        |
|-------------------|--------|-------------------|--------|-------------------|--------|
| fragment_355.2325 | : 0.05 | fragment_933.6125 | : 0.01 | fragment_329.1825 | : 0.01 |
| fragment_596.3425 | : 0.04 | fragment_320.2375 | : 0.01 | fragment_695.4075 | : 0.01 |
| fragment_171.1125 | : 0.03 | fragment_997.5075 | : 0.01 | fragment_674.4275 | : 0.01 |
| fragment_468.3175 | : 0.03 | loss_184.0175     | : 0.01 | fragment_692.4275 | : 0.01 |
| fragment_284.1975 | : 0.03 | loss_196.0525     | : 0.01 | fragment_298.2125 | : 0.01 |
| fragment_185.1325 | : 0.02 | fragment_378.7275 | : 0.01 | fragment_709.4225 | : 0.01 |
| fragment_242.1475 | : 0.02 | loss_25.4275      | : 0.01 | fragment_159.0775 | : 0.01 |
| fragment_157.1325 | : 0.02 | fragment_814.5075 | : 0.01 | loss_85.0475      | : 0.01 |
| fragment_585.3275 | : 0.02 | fragment_214.1175 | : 0.01 | fragment_196.1075 | : 0.01 |
| fragment_256.1675 | : 0.02 | fragment_143.1175 | : 0.01 | loss_25.1775      | : 0.01 |
| fragment_597.3425 | : 0.01 | fragment_691.9225 | : 0.01 | fragment_998.5125 | : 0.01 |
| fragment_680.9325 | : 0.01 | fragment_652.4375 | : 0.01 | fragment_367.2325 | : 0.01 |
| fragment_681.4325 | : 0.01 | fragment_684.3475 | : 0.01 | fragment_469.3225 | : 0.01 |
| fragment_369.2525 | : 0.01 | fragment_673.9225 | : 0.01 | fragment_320.5775 | : 0.01 |
| fragment_567.3875 | : 0.01 | fragment_474.2075 | : 0.01 | fragment_412.2225 | : 0.01 |
| fragment_539.3525 | : 0.01 | loss_167.7825     | : 0.01 | fragment_356.2375 | : 0.01 |
| fragment_751.5075 | : 0.01 | fragment_185.1275 | : 0.01 |                   |        |
| fragment_270.1825 | : 0.01 | fragment_426.2625 | : 0.01 |                   |        |
| loss_77.5825      | : 0.01 | fragment_327.2375 | : 0.01 |                   |        |
| loss_84.5875      | : 0.01 | fragment_525.3025 | : 0.01 |                   |        |

StrepSalini\_motif\_224.m2m

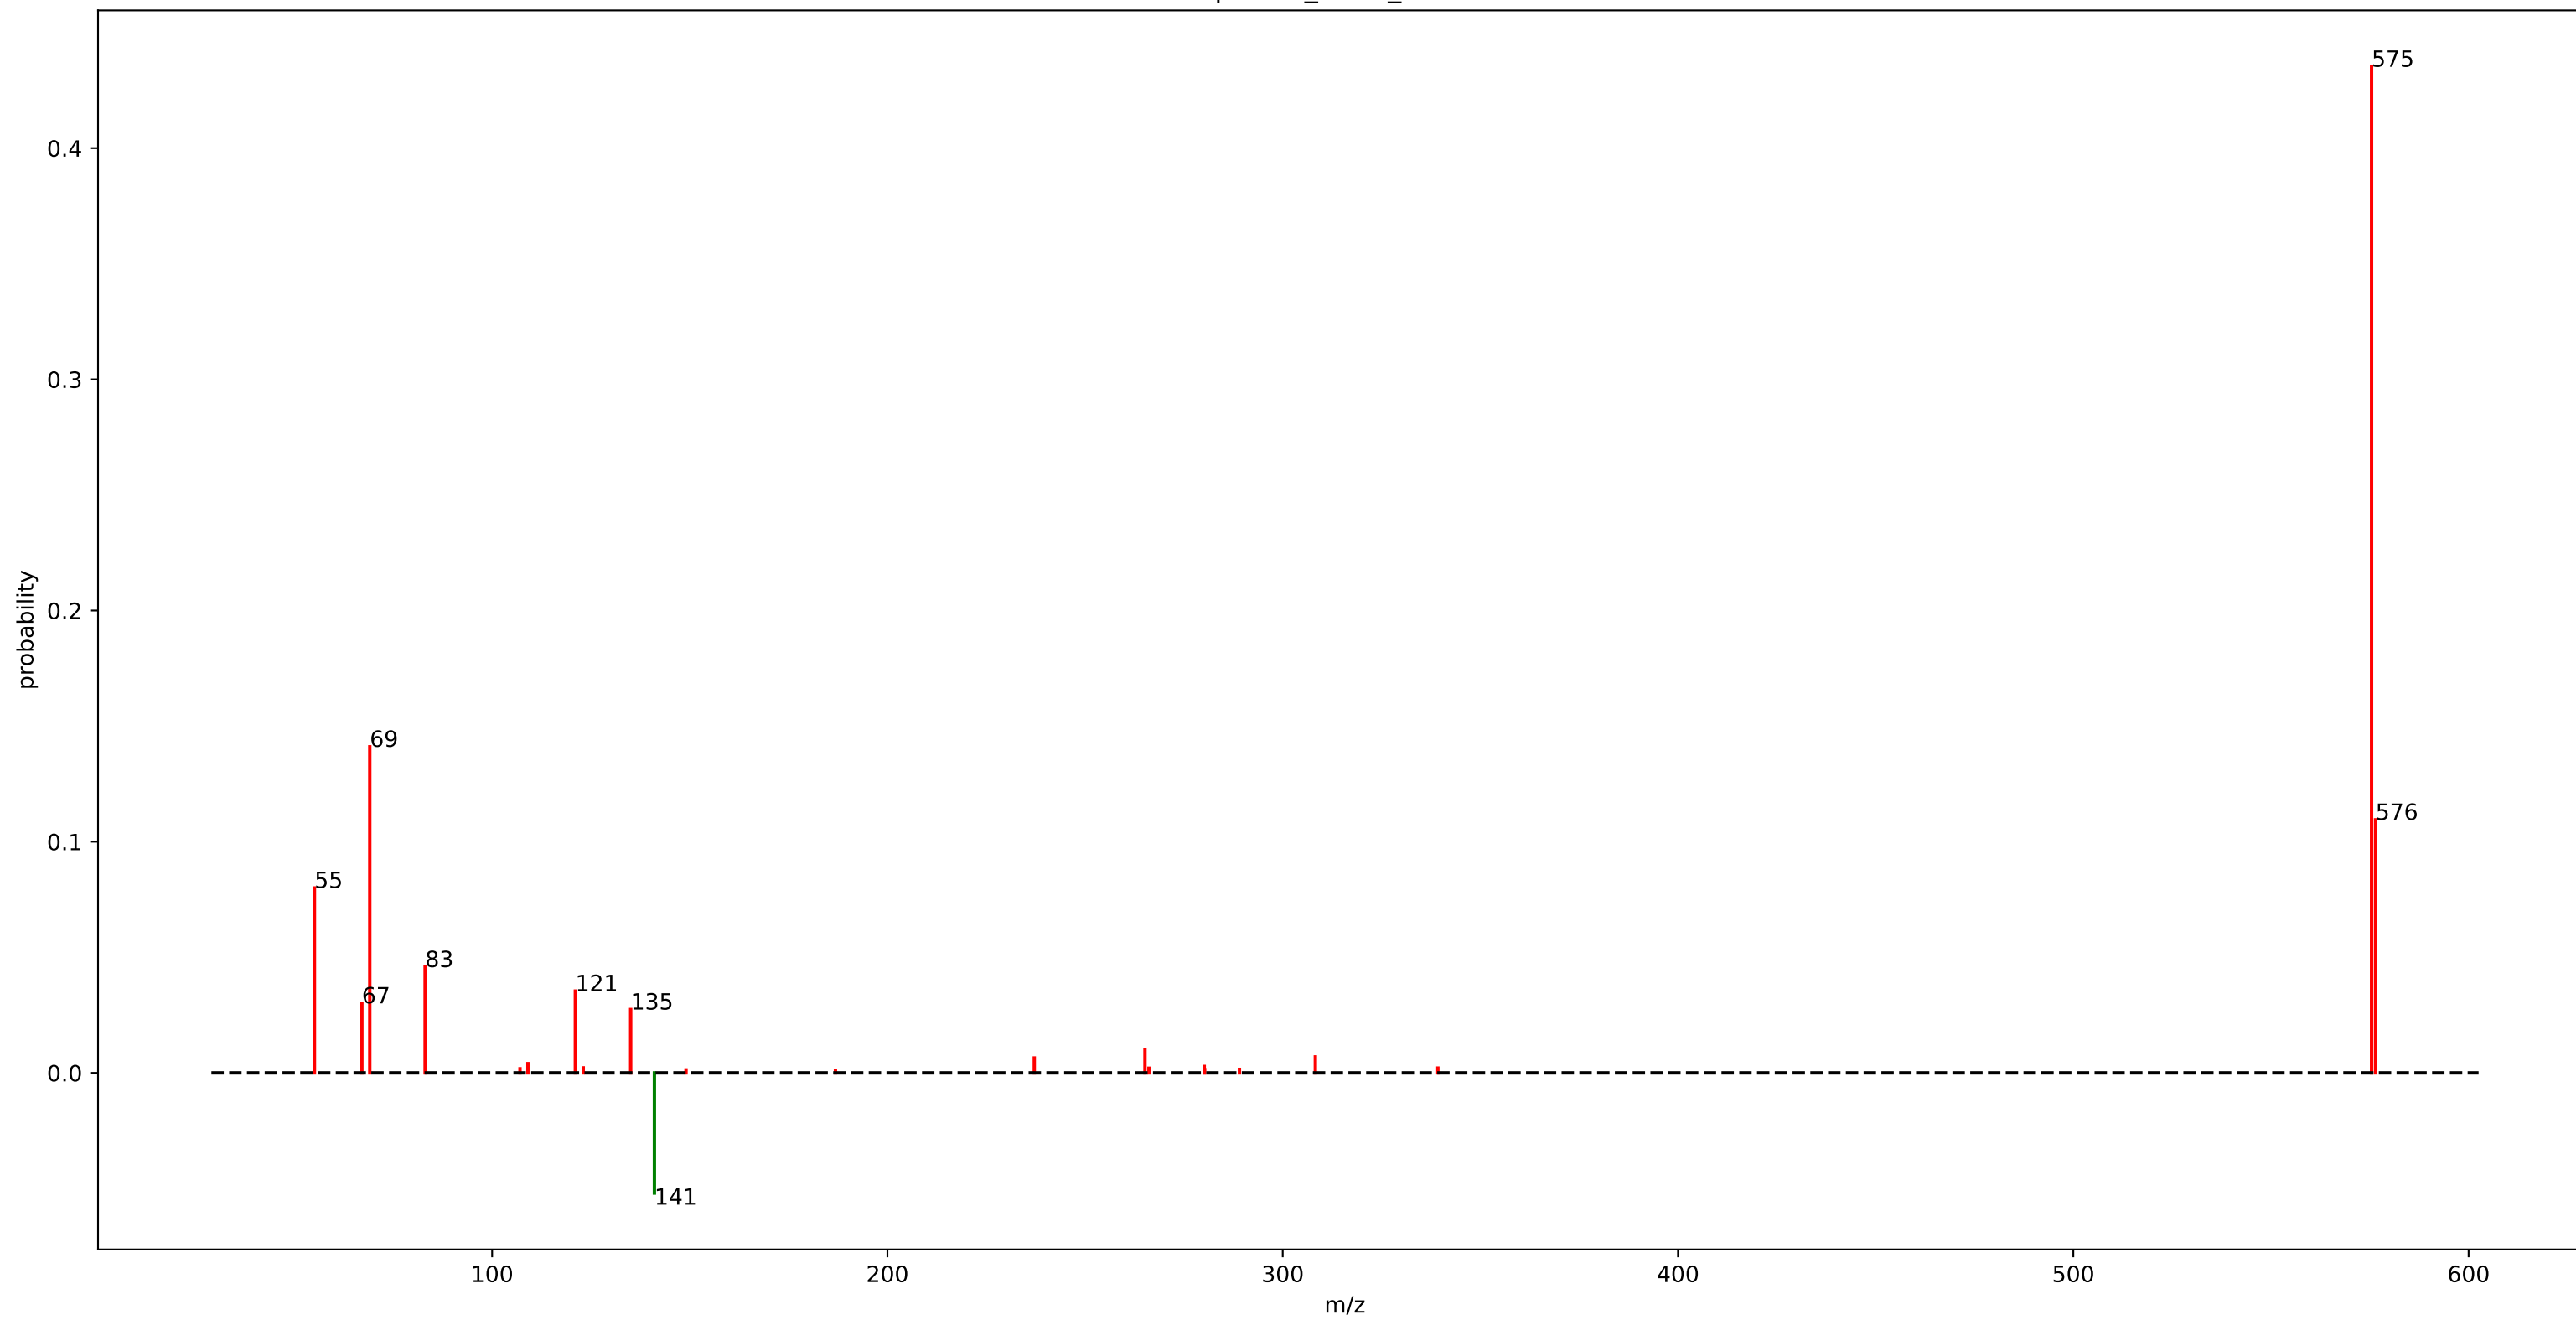

## StrepSalini\_motif\_224.m2m

|                   |        |
|-------------------|--------|
| fragment_575.4500 | : 0.44 |
| fragment_69.0500  | : 0.14 |
| fragment_576.4500 | : 0.11 |
| fragment_55.0500  | : 0.08 |
| loss_141.0525     | : 0.05 |
| fragment_83.0500  | : 0.05 |
| fragment_121.0525 | : 0.04 |
| fragment_67.0500  | : 0.03 |
| fragment_135.0500 | : 0.03 |
| fragment_265.1525 | : 0.01 |
| fragment_308.2500 | : 0.01 |
| fragment_237.1500 | : 0.01 |

euphorbia\_motif\_413.m2m

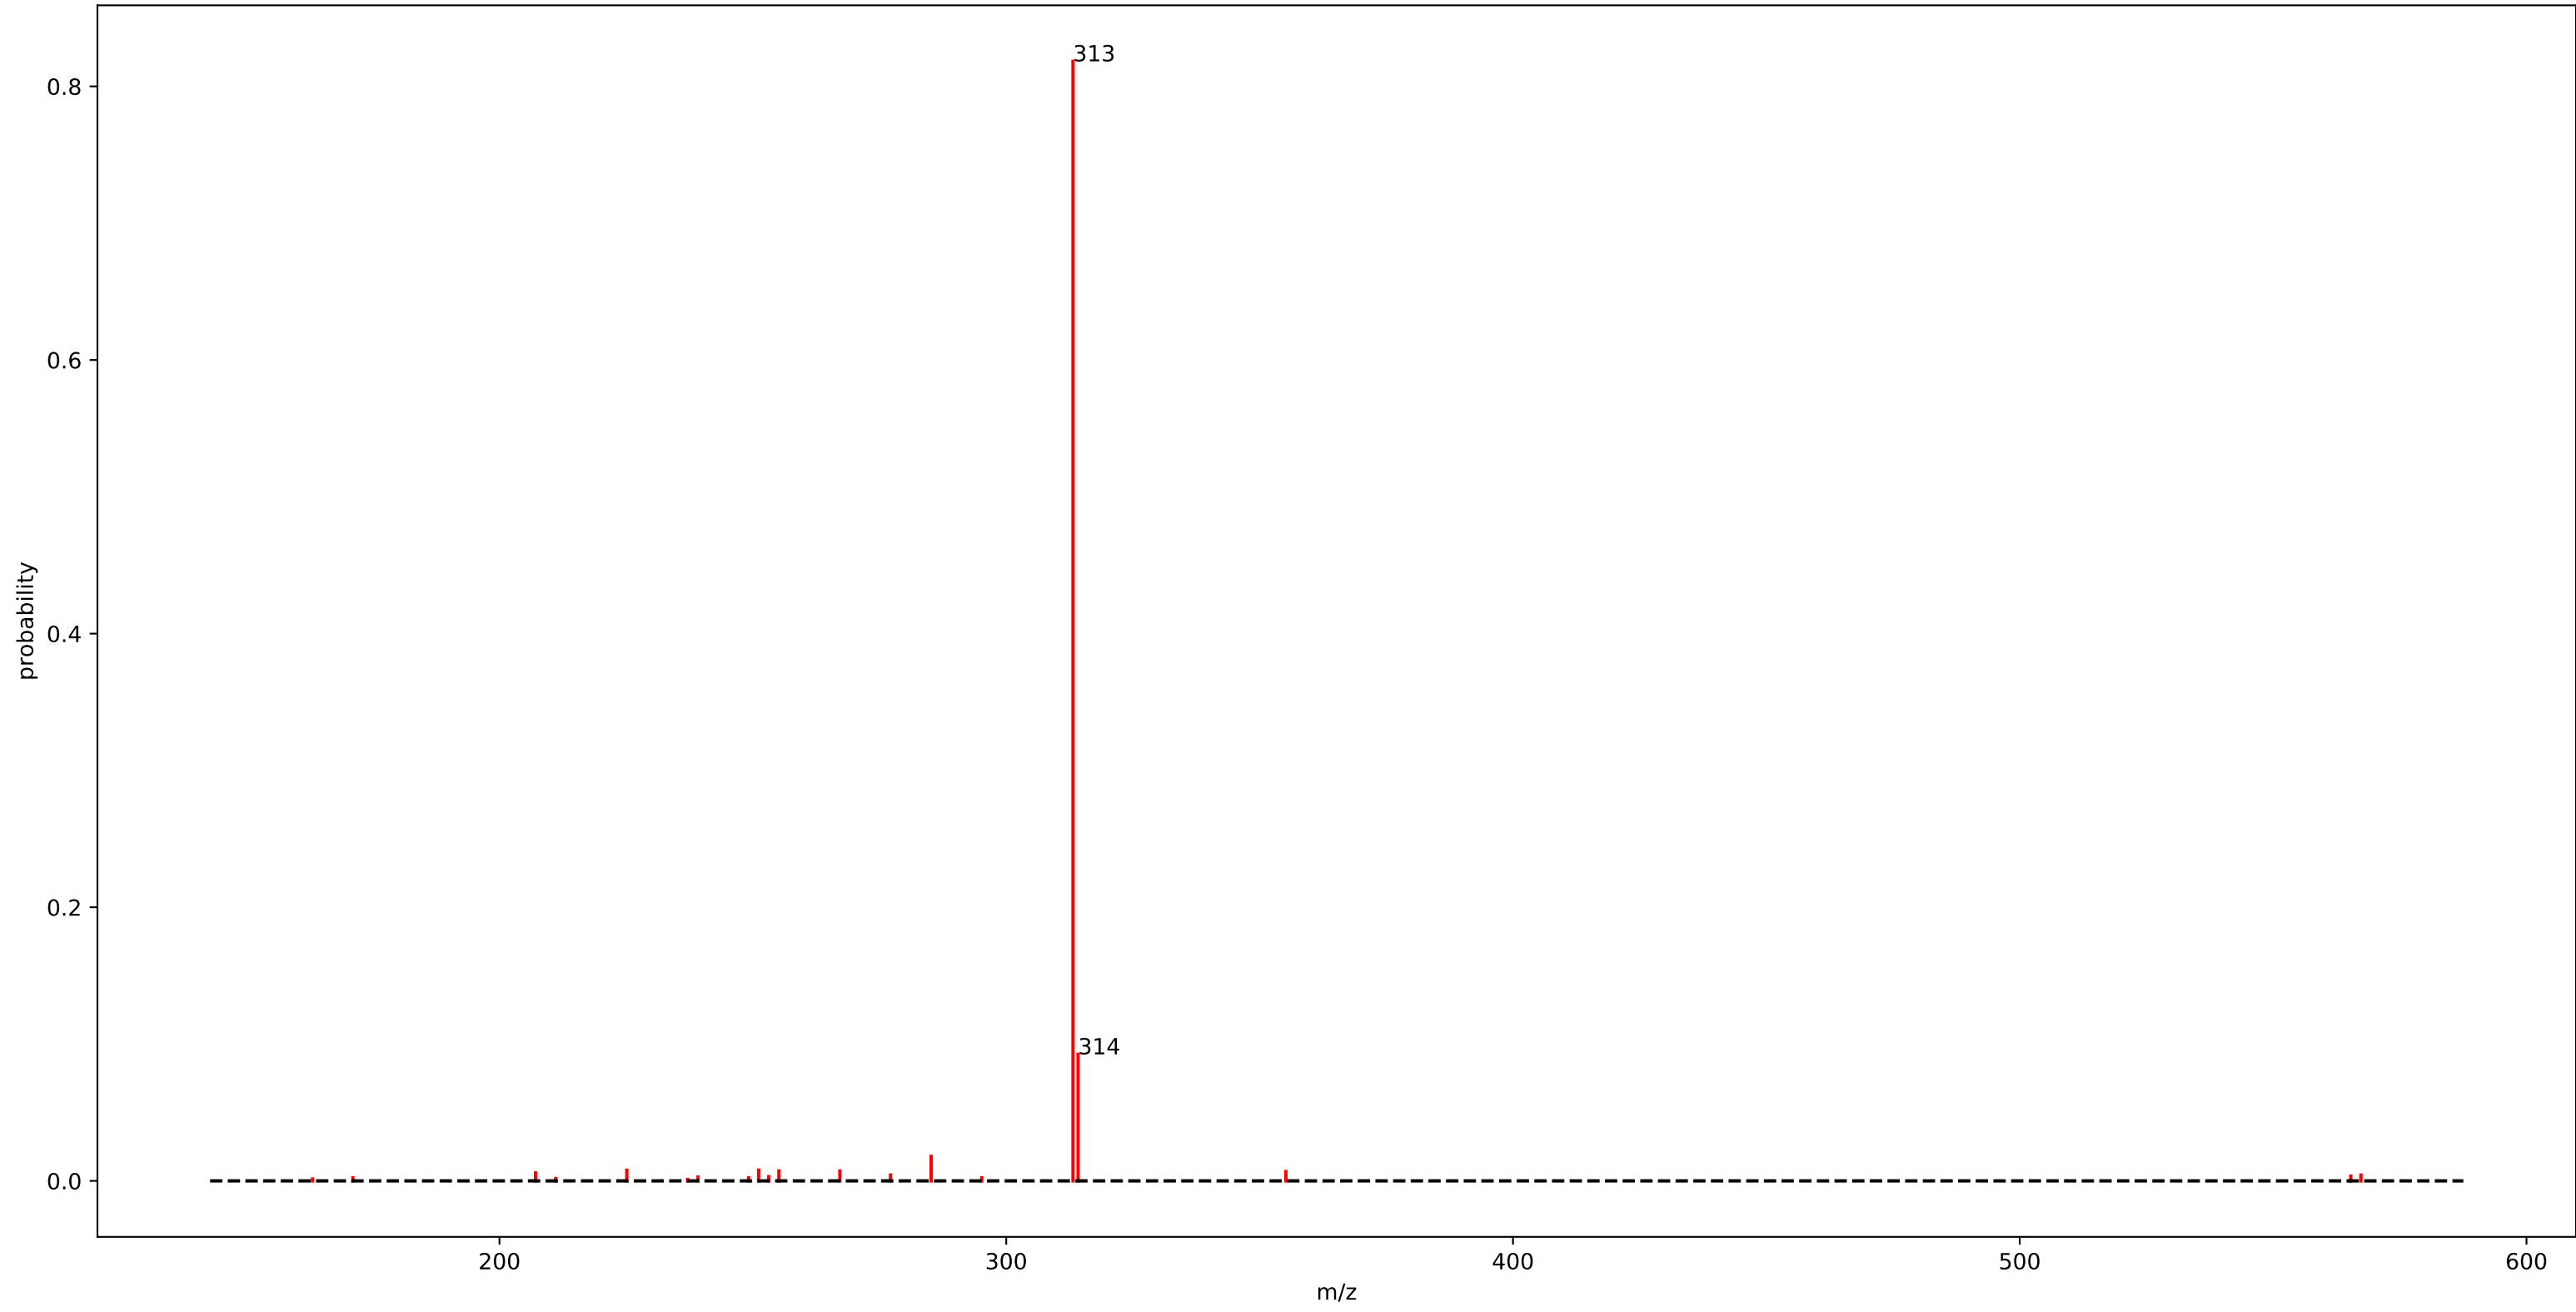

## euphorbia\_motif\_413.m2m

|                   |        |
|-------------------|--------|
| fragment_313.1775 | : 0.82 |
| fragment_314.1825 | : 0.09 |
| fragment_285.1825 | : 0.02 |
| fragment_251.1425 | : 0.01 |
| fragment_225.1275 | : 0.01 |
| fragment_255.1375 | : 0.01 |
| fragment_267.1725 | : 0.01 |
| fragment_355.1875 | : 0.01 |
| fragment_207.1175 | : 0.01 |

urine\_mass2motif\_149.m2m

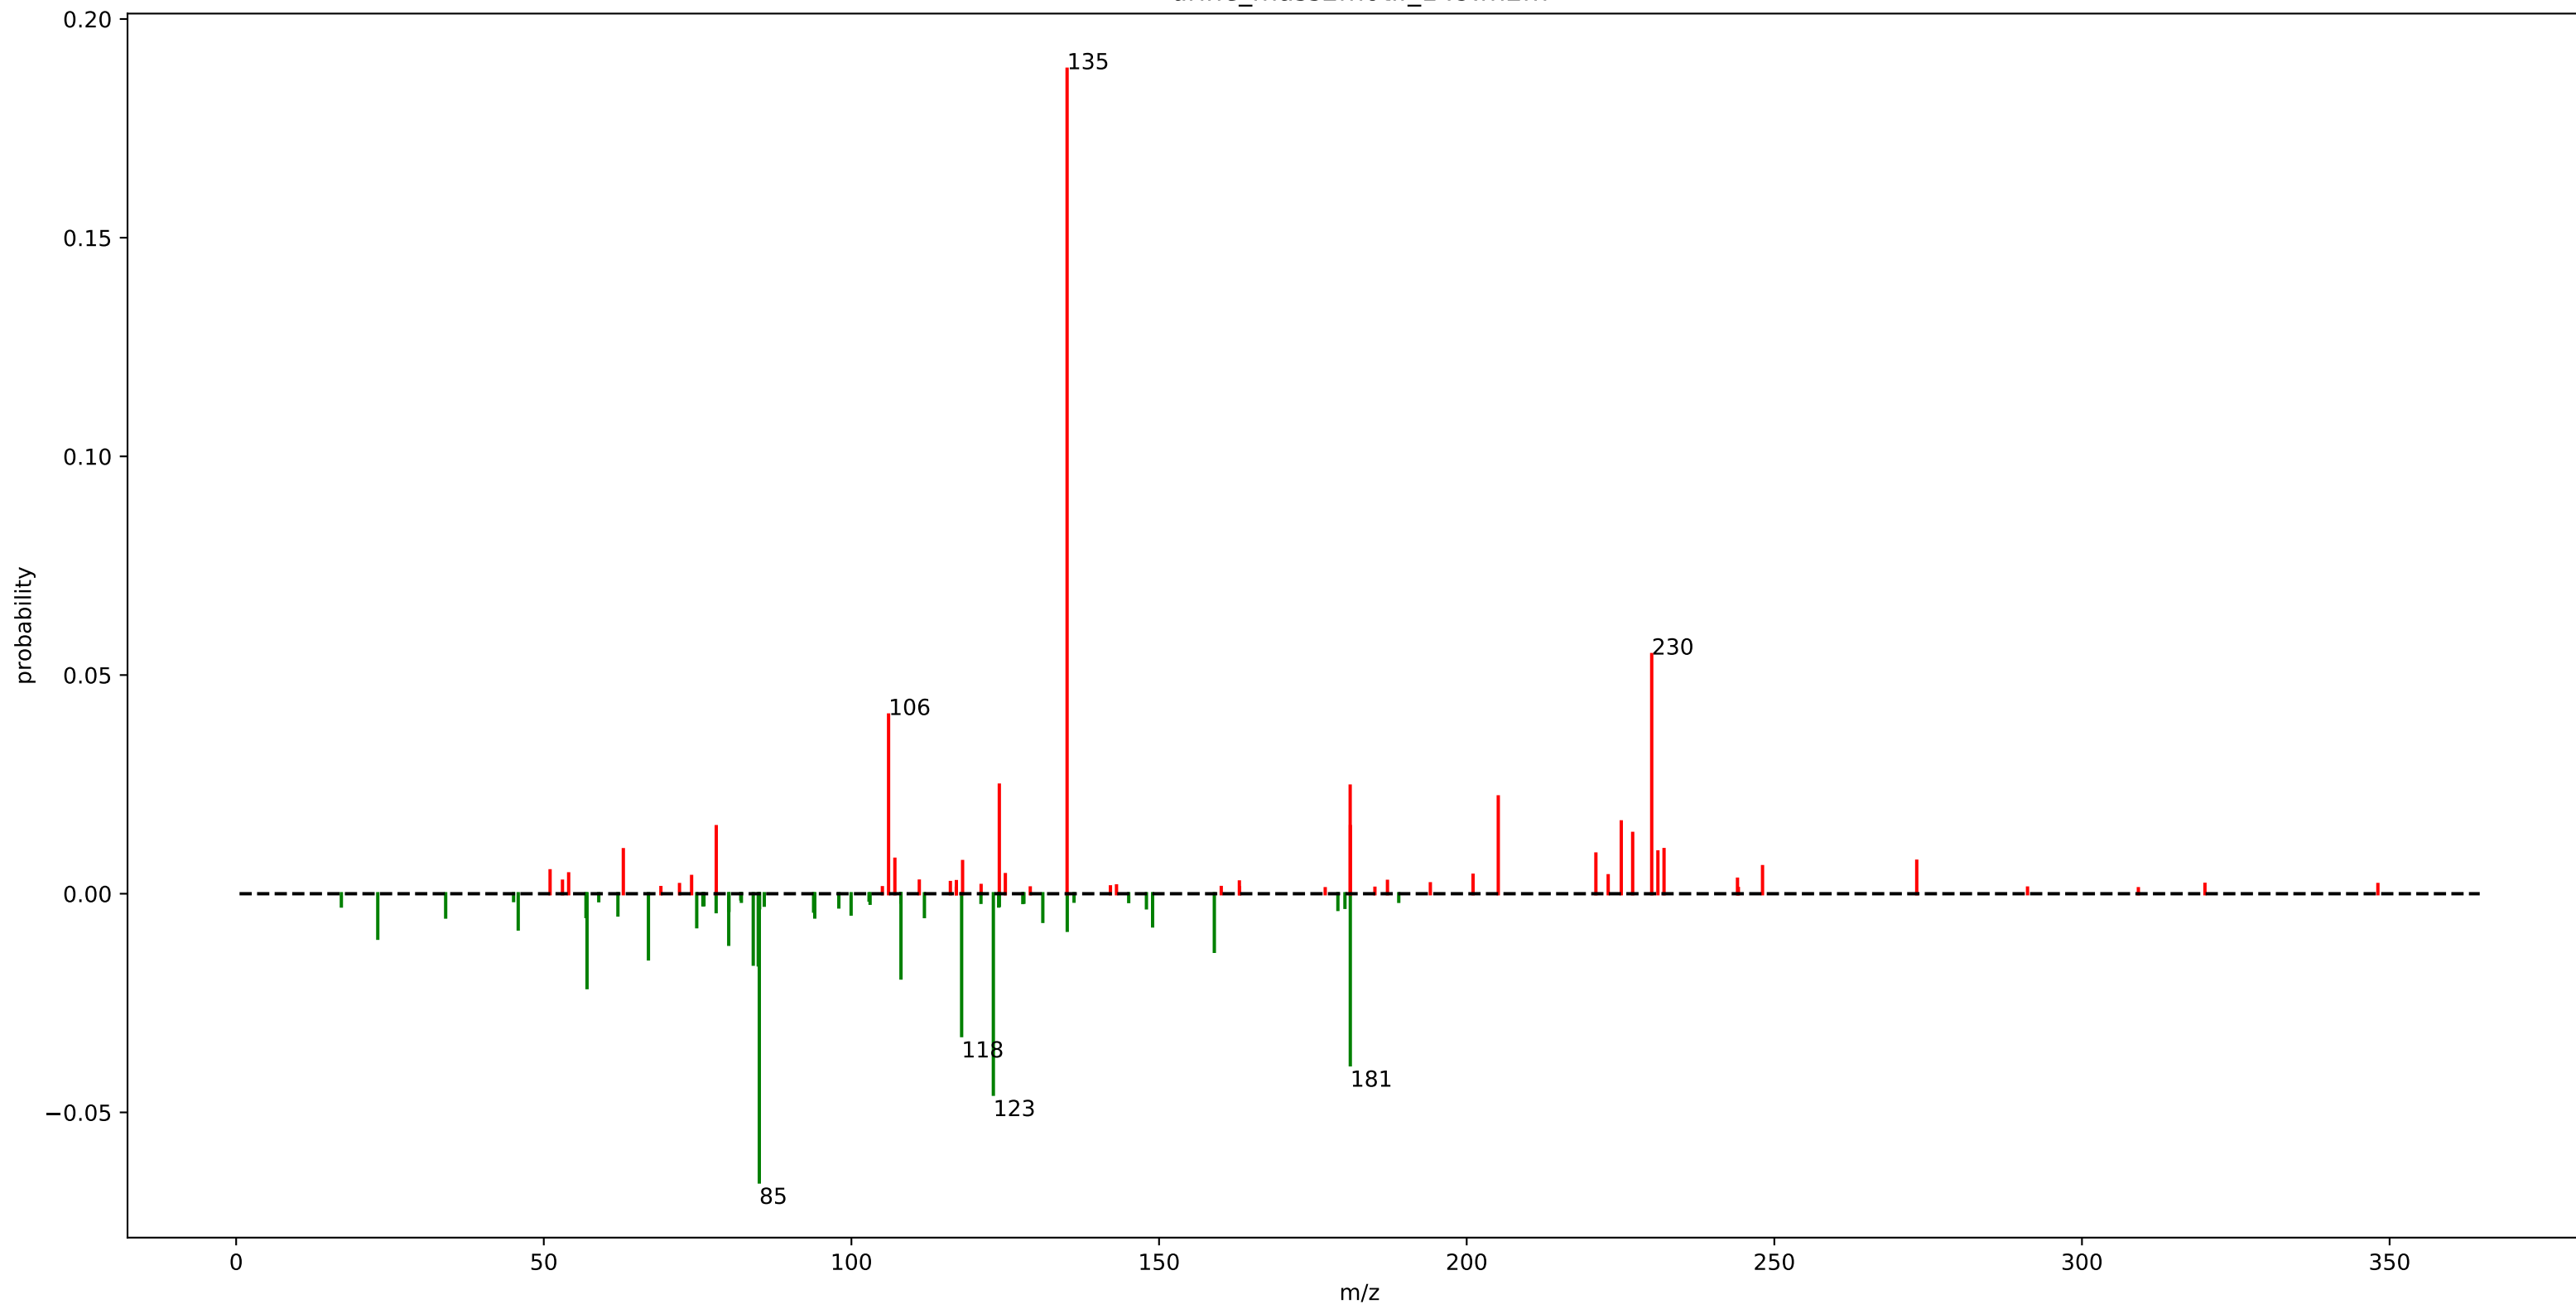

# urine\_mass2motif\_149.m2m

|                   |        |                   |        |
|-------------------|--------|-------------------|--------|
| fragment_135.0525 | : 0.19 | loss_80.0575      | : 0.01 |
| loss_85.0275      | : 0.07 | loss_23.0175      | : 0.01 |
| fragment_230.0725 | : 0.05 | fragment_232.0725 | : 0.01 |
| loss_123.0675     | : 0.05 | fragment_62.9275  | : 0.01 |
| fragment_106.0375 | : 0.04 | fragment_231.0775 | : 0.01 |
| loss_181.0825     | : 0.04 | fragment_220.9975 | : 0.01 |
| loss_117.9125     | : 0.03 | loss_135.0775     | : 0.01 |
| fragment_124.0375 | : 0.02 | loss_45.8425      | : 0.01 |
| fragment_181.0625 | : 0.02 | fragment_107.0625 | : 0.01 |
| fragment_205.1325 | : 0.02 | loss_74.8575      | : 0.01 |
| loss_57.0275      | : 0.02 | fragment_273.1475 | : 0.01 |
| loss_108.0525     | : 0.02 | loss_148.9525     | : 0.01 |
| fragment_225.1225 | : 0.02 | fragment_118.0675 | : 0.01 |
| loss_84.8525      | : 0.02 | loss_131.1075     | : 0.01 |
| loss_84.0425      | : 0.02 | fragment_248.0825 | : 0.01 |
| fragment_181.0925 | : 0.02 | loss_34.0525      | : 0.01 |
| fragment_78.0325  | : 0.02 | loss_94.0425      | : 0.01 |
| loss_67.0075      | : 0.01 | fragment_51.0225  | : 0.01 |
| fragment_226.9775 | : 0.01 | loss_111.8625     | : 0.01 |
| loss_158.9825     | : 0.01 | loss_56.8575      | : 0.01 |



rhamn\_motif\_121.m2m

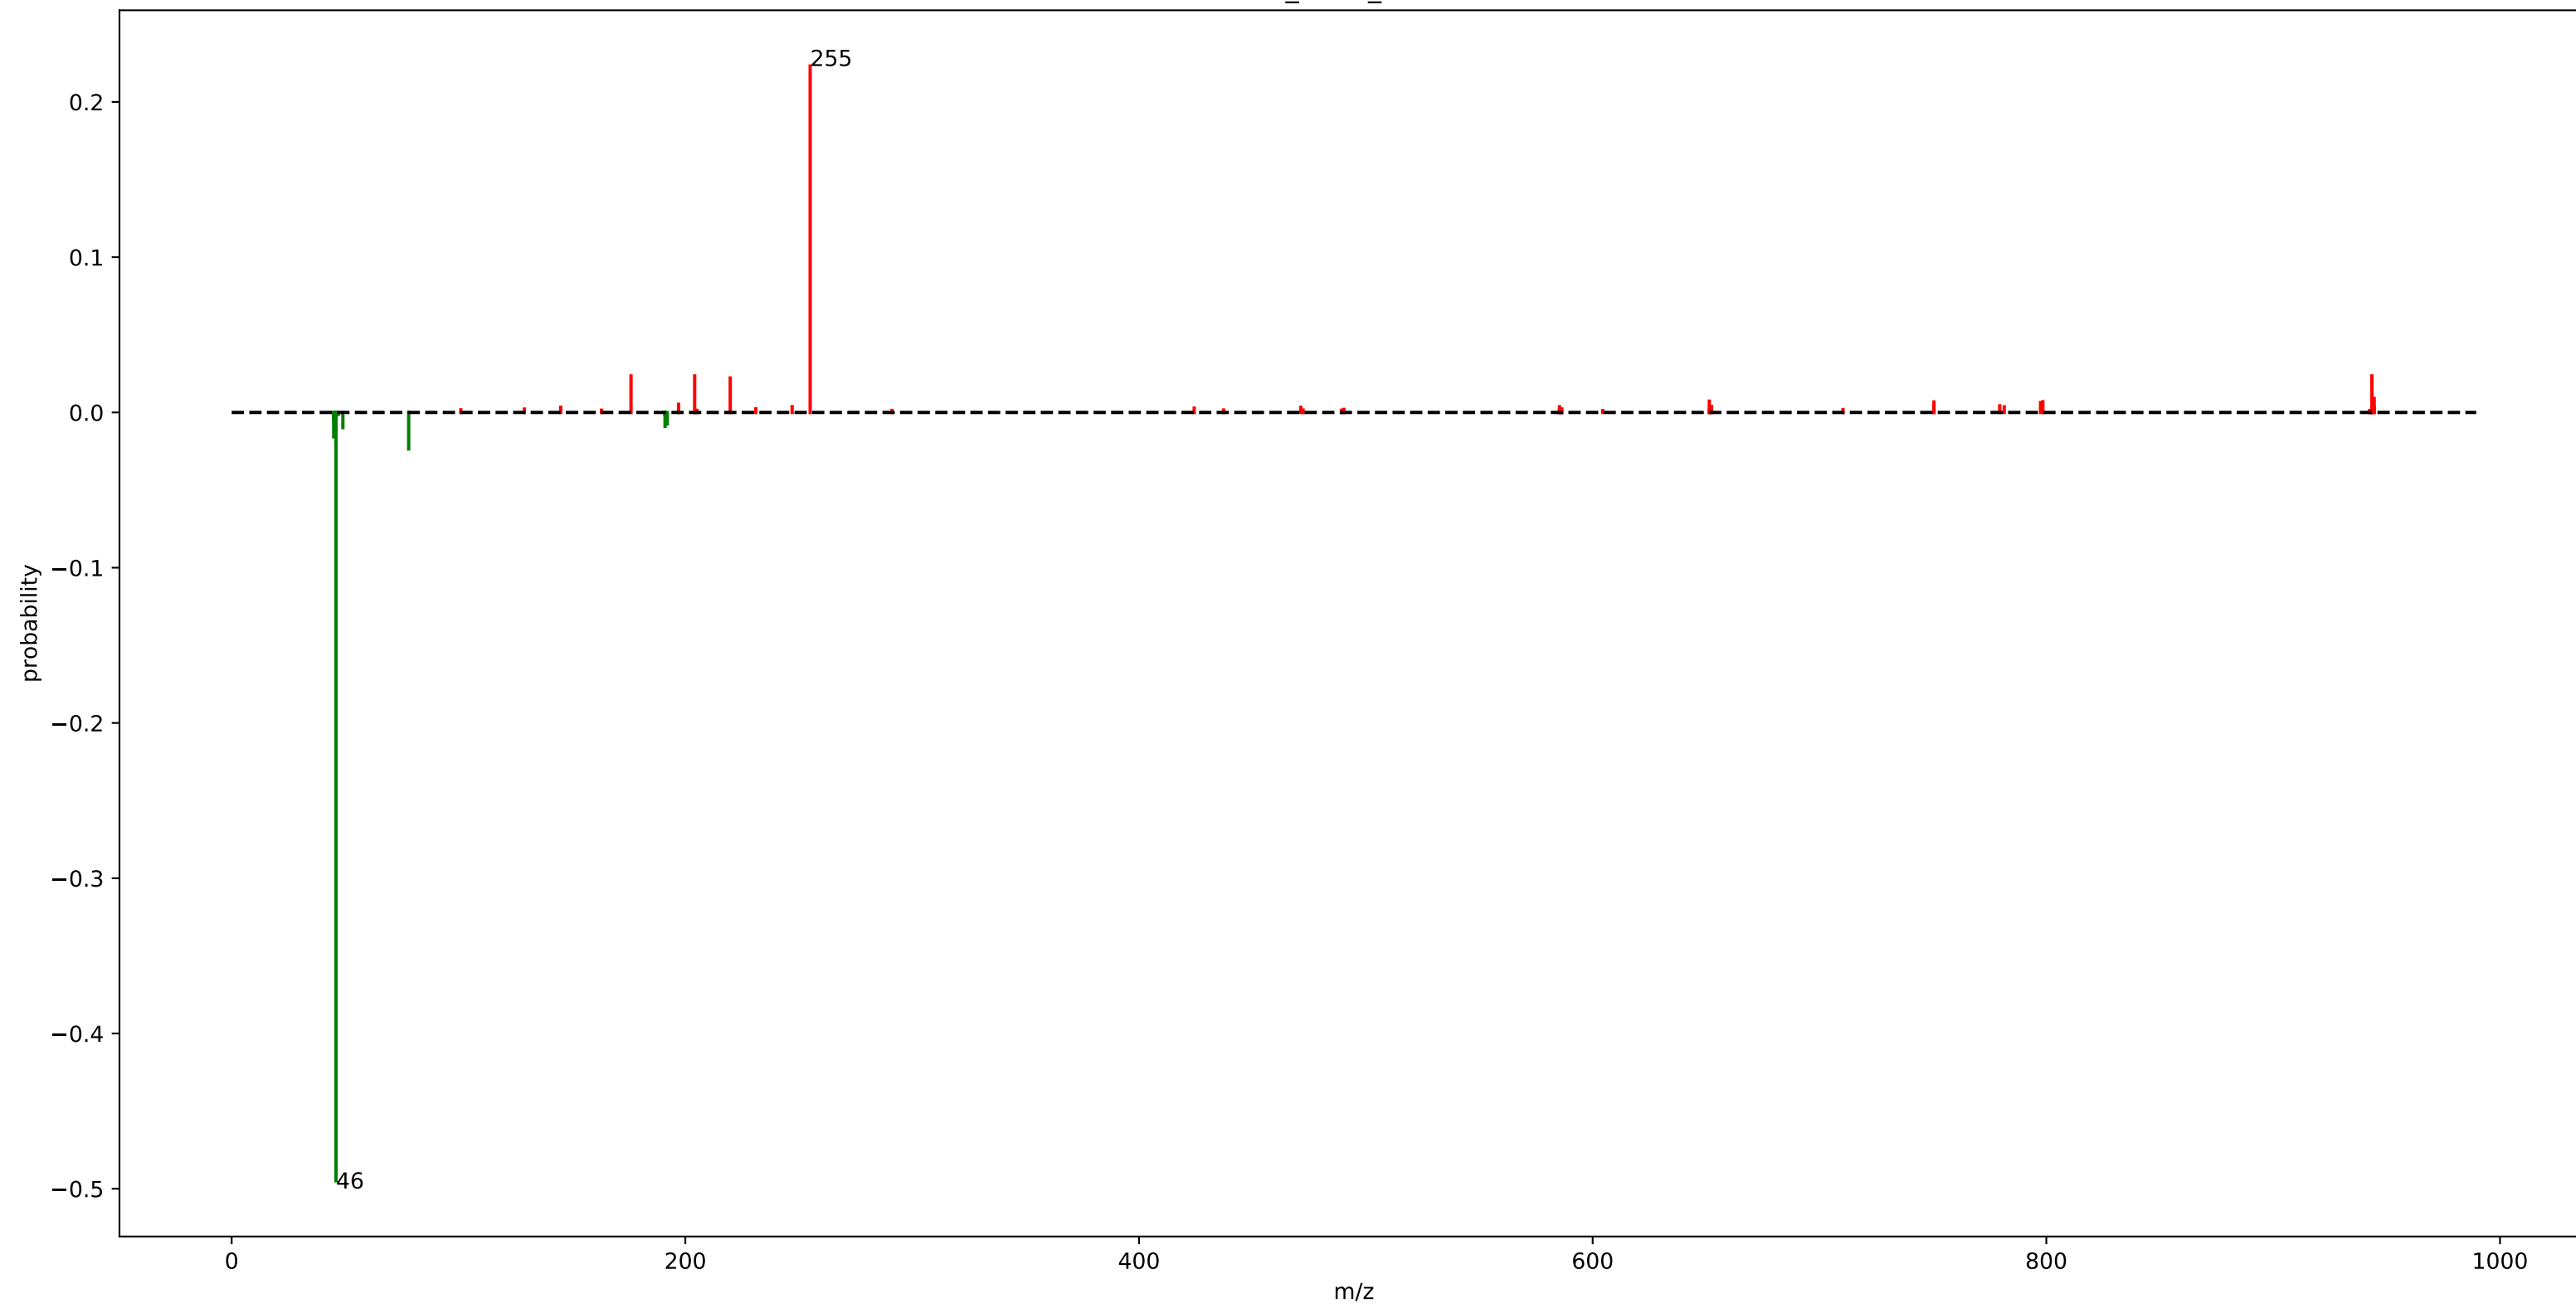

## rhamn\_motif\_121.m2m

|                   |        |
|-------------------|--------|
| loss_46.0025      | : 0.49 |
| fragment_255.0325 | : 0.22 |
| fragment_176.0525 | : 0.02 |
| loss_78.0325      | : 0.02 |
| fragment_943.5275 | : 0.02 |
| fragment_204.1125 | : 0.02 |
| fragment_219.7975 | : 0.02 |
| loss_44.9875      | : 0.02 |
| loss_49.0275      | : 0.01 |
| fragment_944.5375 | : 0.01 |
| loss_191.0575     | : 0.01 |
| loss_192.0675     | : 0.01 |
| fragment_651.4175 | : 0.01 |
| fragment_798.4725 | : 0.01 |
| fragment_750.4625 | : 0.01 |
| fragment_797.4625 | : 0.01 |
| fragment_197.0125 | : 0.01 |
| loss_45.0125      | : 0.01 |

urine\_mass2motif\_271.m2m

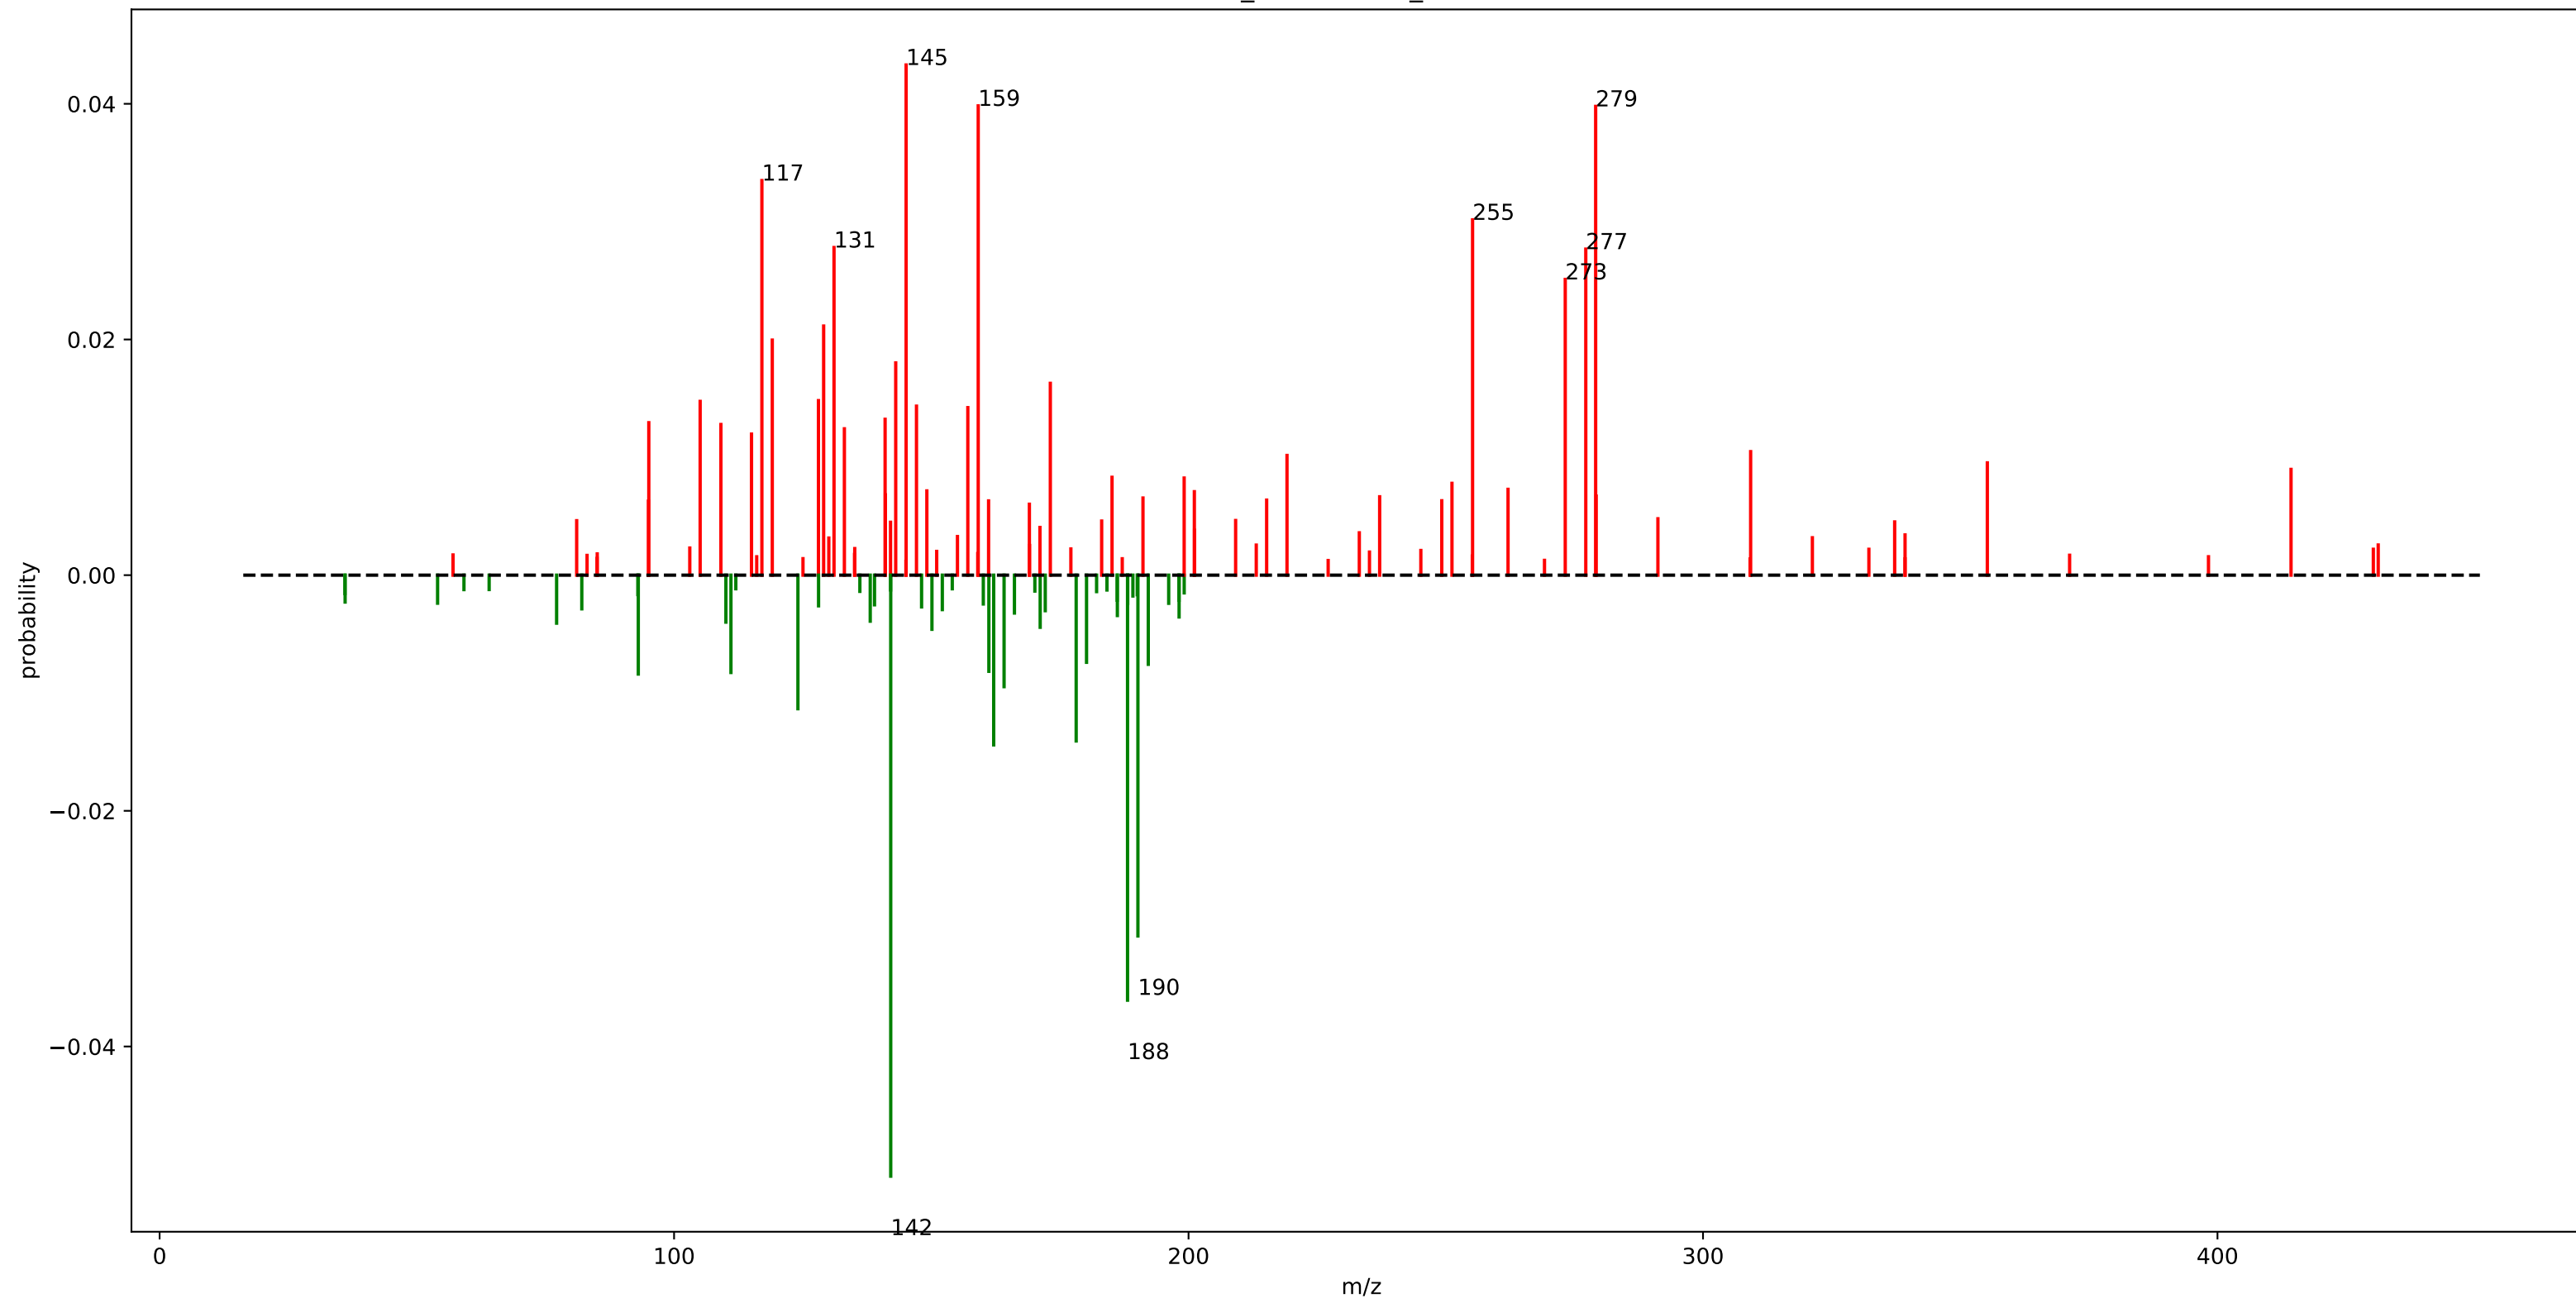

# urine\_mass2motif\_271.m2m

|                   |        |                   |        |                   |        |
|-------------------|--------|-------------------|--------|-------------------|--------|
| loss_142.1125     | : 0.05 | loss_178.1575     | : 0.01 | fragment_262.1025 | : 0.01 |
| fragment_145.1025 | : 0.04 | fragment_141.0175 | : 0.01 | fragment_149.1325 | : 0.01 |
| fragment_159.1175 | : 0.04 | fragment_95.0875  | : 0.01 | fragment_201.1275 | : 0.01 |
| fragment_279.1325 | : 0.04 | fragment_109.1025 | : 0.01 | fragment_141.0675 | : 0.01 |
| loss_188.1425     | : 0.04 | fragment_133.1025 | : 0.01 | fragment_279.2325 | : 0.01 |
| fragment_117.0675 | : 0.03 | fragment_115.0525 | : 0.01 | fragment_237.1475 | : 0.01 |
| loss_190.1575     | : 0.03 | loss_124.0725     | : 0.01 | fragment_191.1425 | : 0.01 |
| fragment_255.2075 | : 0.03 | fragment_309.2575 | : 0.01 | fragment_215.1825 | : 0.01 |
| fragment_131.0875 | : 0.03 | fragment_219.1375 | : 0.01 | fragment_249.2225 | : 0.01 |
| fragment_277.2125 | : 0.03 | fragment_355.2625 | : 0.01 | fragment_161.1325 | : 0.01 |
| fragment_273.2225 | : 0.03 | loss_164.1425     | : 0.01 | fragment_95.0125  | : 0.01 |
| fragment_129.0725 | : 0.02 | fragment_414.2975 | : 0.01 | fragment_169.0625 | : 0.01 |
| fragment_119.0875 | : 0.02 | loss_93.0425      | : 0.01 |                   |        |
| fragment_143.0825 | : 0.02 | fragment_185.1275 | : 0.01 |                   |        |
| fragment_173.1325 | : 0.02 | loss_111.0525     | : 0.01 |                   |        |
| fragment_128.0625 | : 0.01 | fragment_199.1475 | : 0.01 |                   |        |
| fragment_105.0675 | : 0.01 | loss_161.1875     | : 0.01 |                   |        |
| loss_162.1275     | : 0.01 | fragment_251.2025 | : 0.01 |                   |        |
| fragment_147.1175 | : 0.01 | loss_192.1725     | : 0.01 |                   |        |
| fragment_157.0975 | : 0.01 | loss_180.1725     | : 0.01 |                   |        |

motif\_542

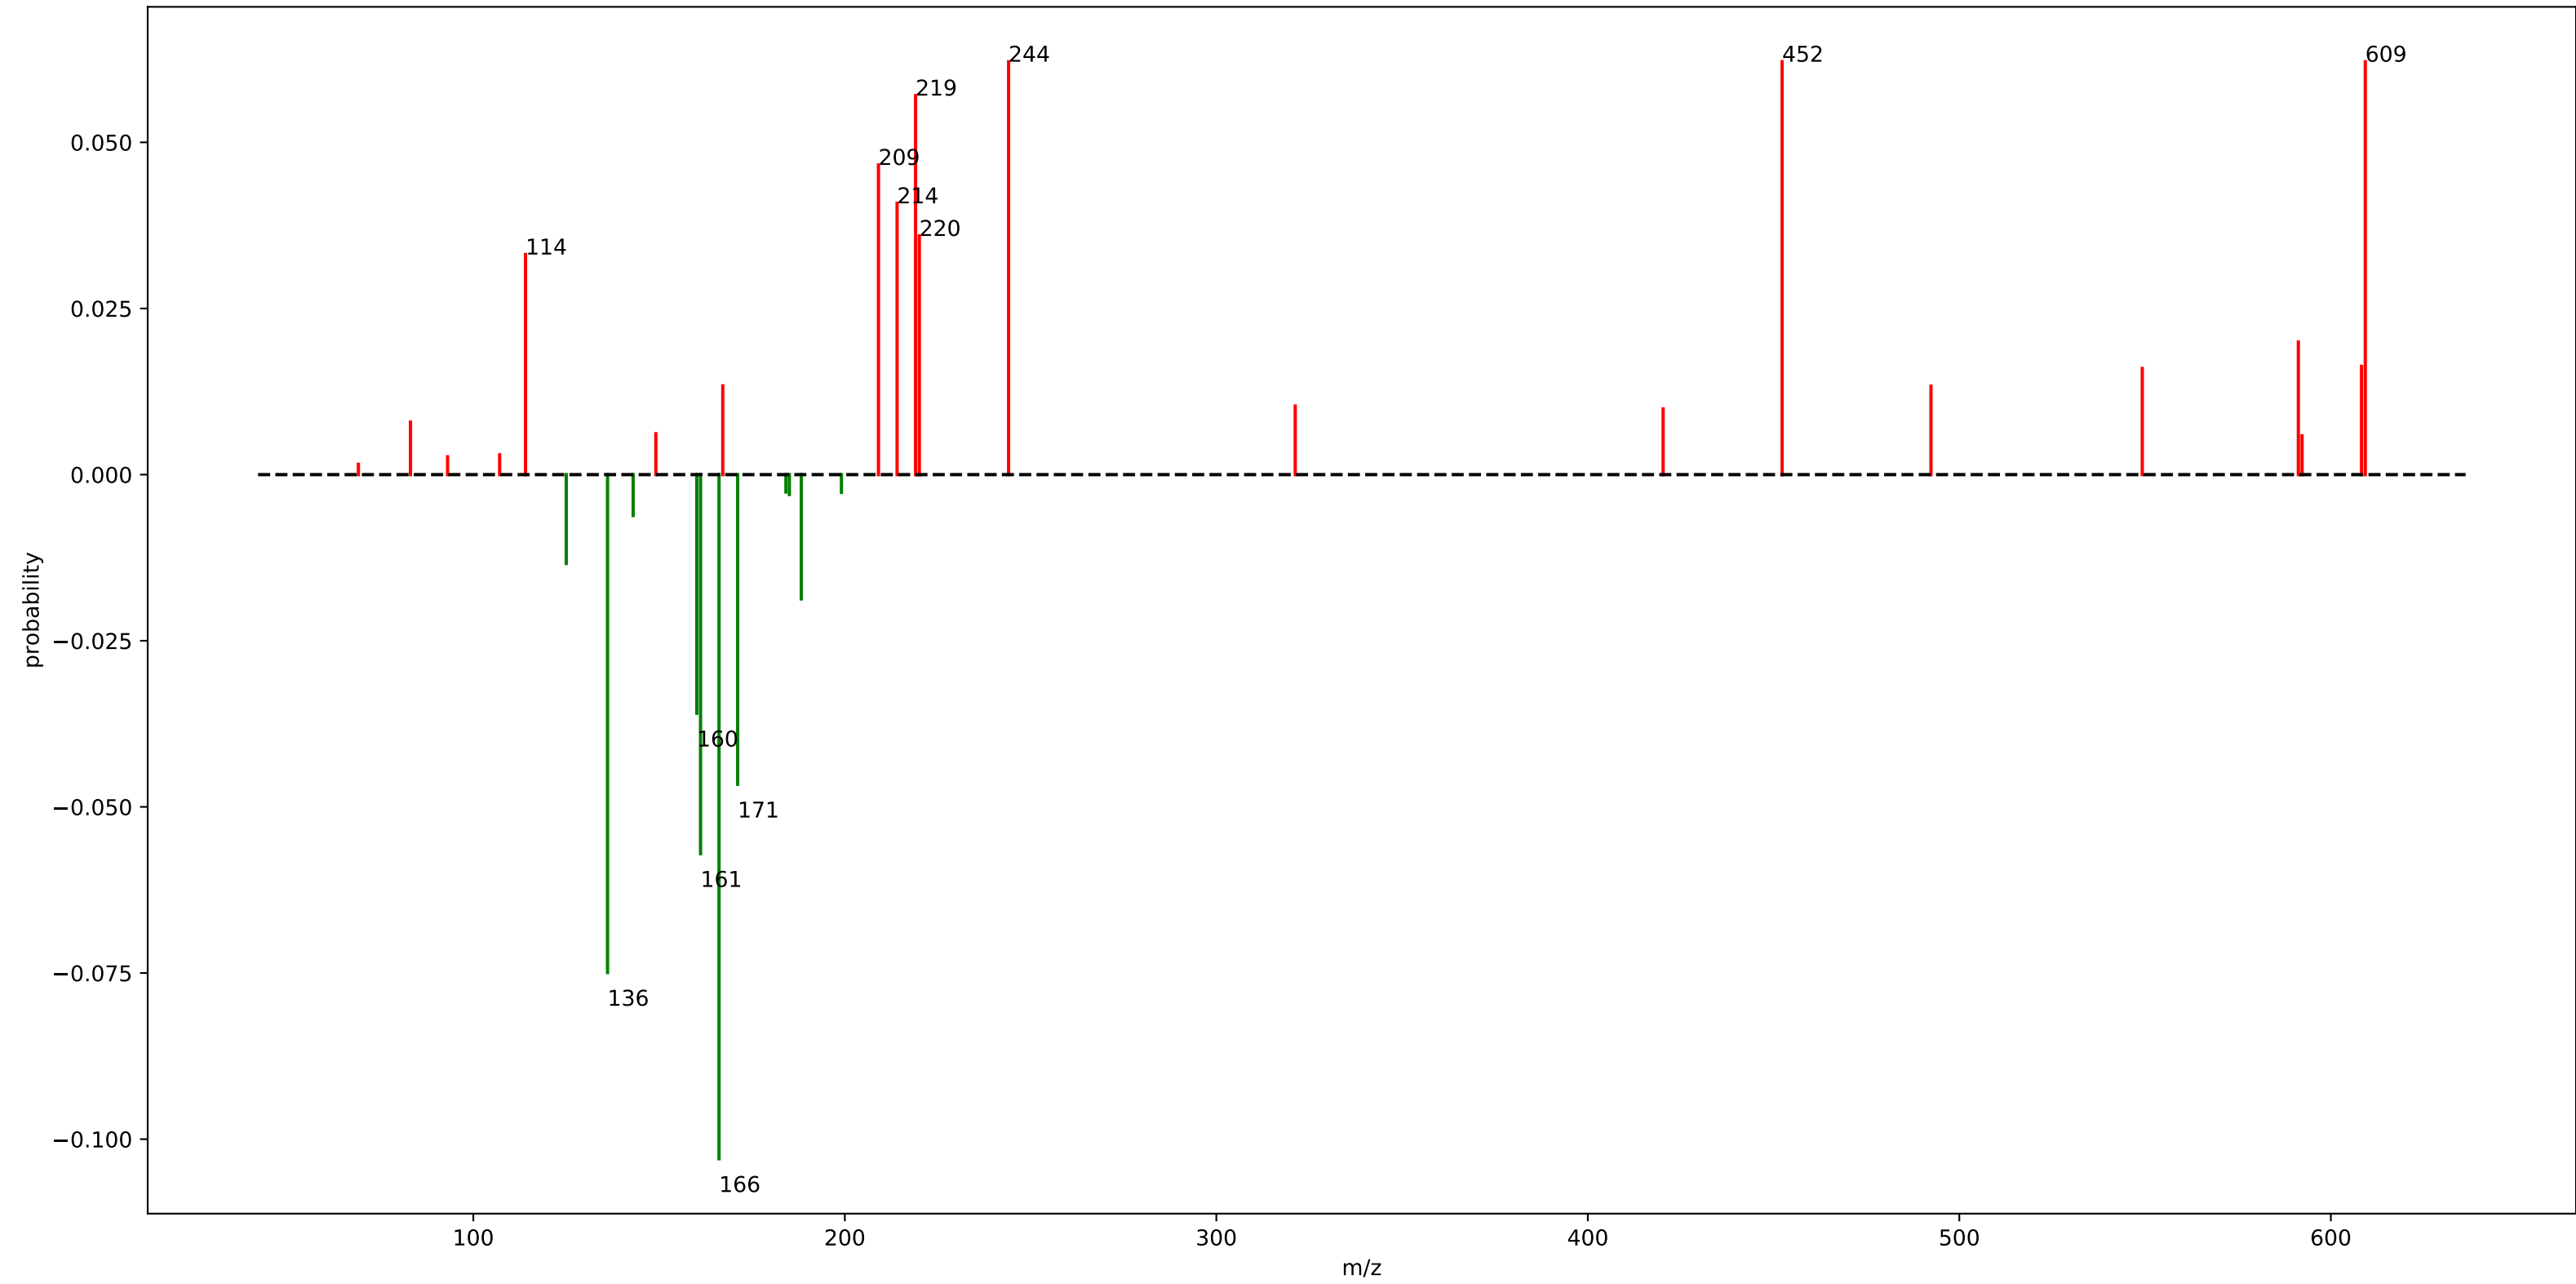

## motif\_542

|                   |        |                   |        |
|-------------------|--------|-------------------|--------|
| loss_166.1375     | : 0.10 | fragment_321.2375 | : 0.01 |
| loss_136.1275     | : 0.07 | fragment_420.2725 | : 0.01 |
| fragment_609.2725 | : 0.06 | fragment_83.0825  | : 0.01 |
| fragment_244.0825 | : 0.06 | fragment_149.1325 | : 0.01 |
| fragment_452.2975 | : 0.06 | loss_143.0225     | : 0.01 |
| fragment_219.0475 | : 0.06 | fragment_592.2625 | : 0.01 |
| loss_161.1625     | : 0.06 |                   |        |
| fragment_209.0525 | : 0.05 |                   |        |
| loss_171.1575     | : 0.05 |                   |        |
| fragment_214.0725 | : 0.04 |                   |        |
| loss_160.1575     | : 0.04 |                   |        |
| fragment_220.0525 | : 0.04 |                   |        |
| fragment_114.0525 | : 0.03 |                   |        |
| fragment_591.2575 | : 0.02 |                   |        |
| loss_188.2875     | : 0.02 |                   |        |
| fragment_608.2625 | : 0.02 |                   |        |
| fragment_549.2475 | : 0.02 |                   |        |
| fragment_167.1425 | : 0.01 |                   |        |
| loss_125.0125     | : 0.01 |                   |        |
| fragment_492.3675 | : 0.01 |                   |        |

rhamn\_motif\_141.m2m

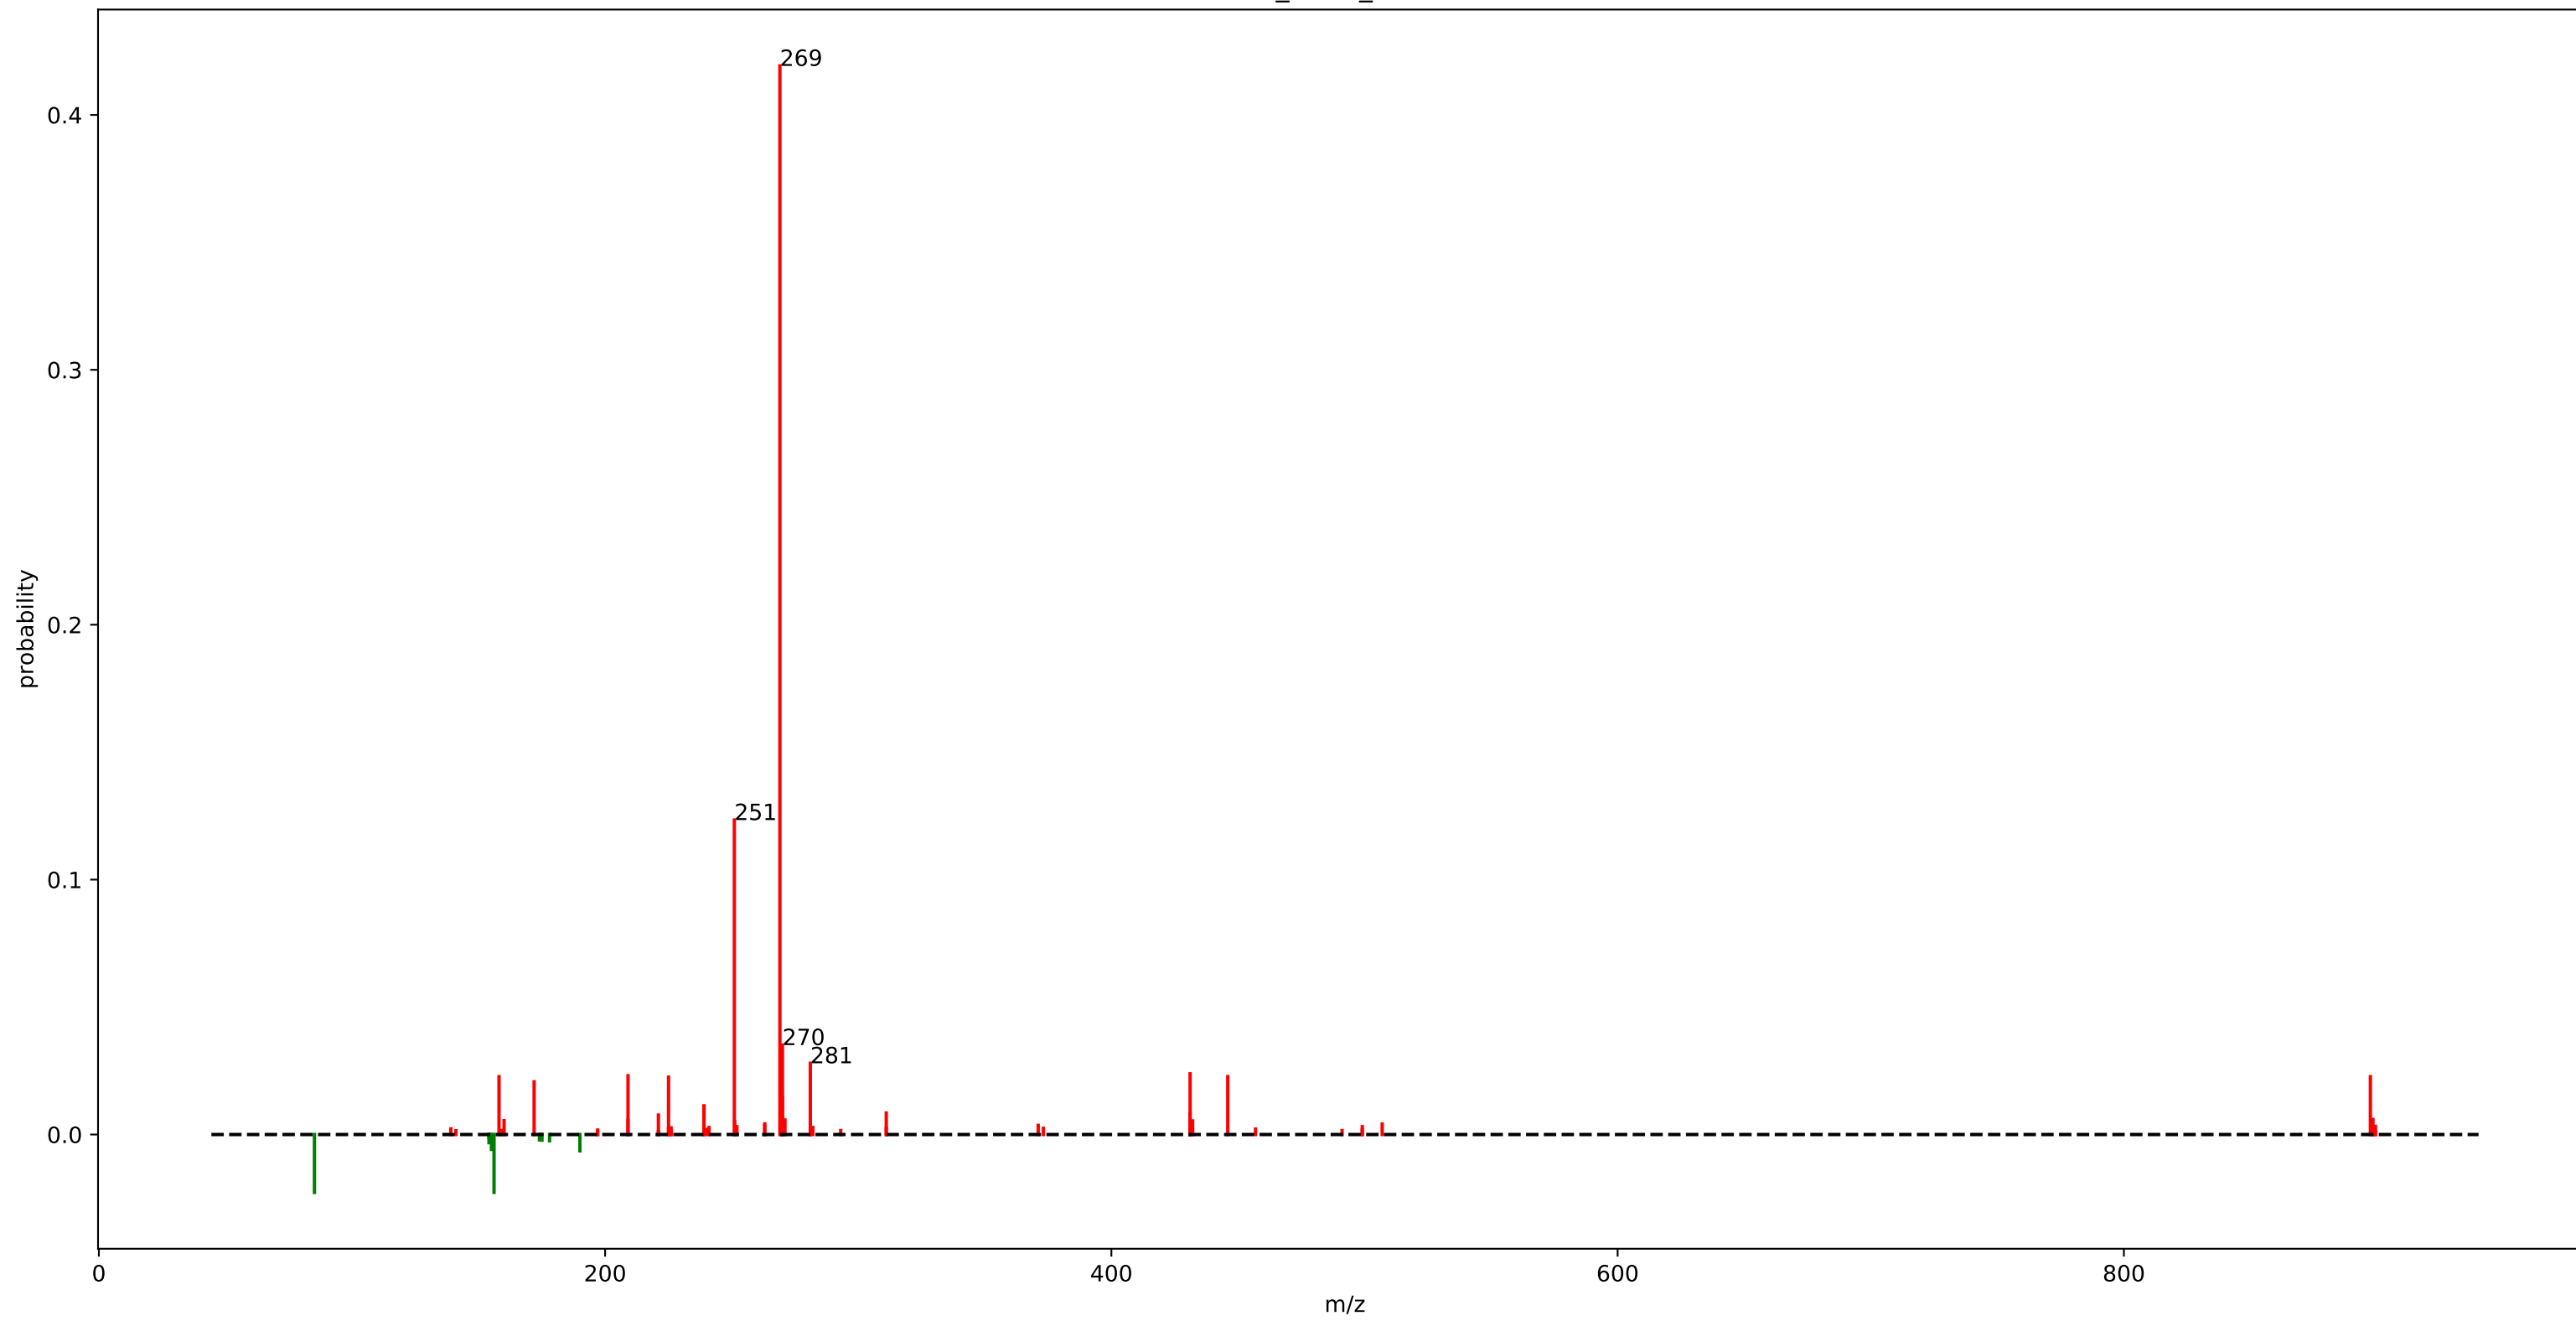

# rhamn\_motif\_141.m2m

|                   |        |                   |        |
|-------------------|--------|-------------------|--------|
| fragment_269.0475 | : 0.42 | fragment_898.3925 | : 0.01 |
| fragment_251.0525 | : 0.12 | loss_155.0975     | : 0.01 |
| fragment_270.0475 | : 0.04 | fragment_271.0525 | : 0.01 |
| fragment_281.0625 | : 0.03 | fragment_209.0325 | : 0.01 |
| fragment_431.1025 | : 0.02 | fragment_160.0775 | : 0.01 |
| fragment_209.0475 | : 0.02 | fragment_432.1025 | : 0.01 |
| loss_85.1725      | : 0.02 | fragment_251.1575 | : 0.01 |
| fragment_445.9825 | : 0.02 |                   |        |
| fragment_158.0825 | : 0.02 |                   |        |
| fragment_897.3775 | : 0.02 |                   |        |
| loss_156.1175     | : 0.02 |                   |        |
| fragment_225.0575 | : 0.02 |                   |        |
| fragment_171.9525 | : 0.02 |                   |        |
| fragment_270.0525 | : 0.01 |                   |        |
| fragment_239.0575 | : 0.01 |                   |        |
| fragment_239.0525 | : 0.01 |                   |        |
| fragment_311.0725 | : 0.01 |                   |        |
| fragment_431.0875 | : 0.01 |                   |        |
| fragment_221.0475 | : 0.01 |                   |        |
| loss_190.0475     | : 0.01 |                   |        |



motif\_543

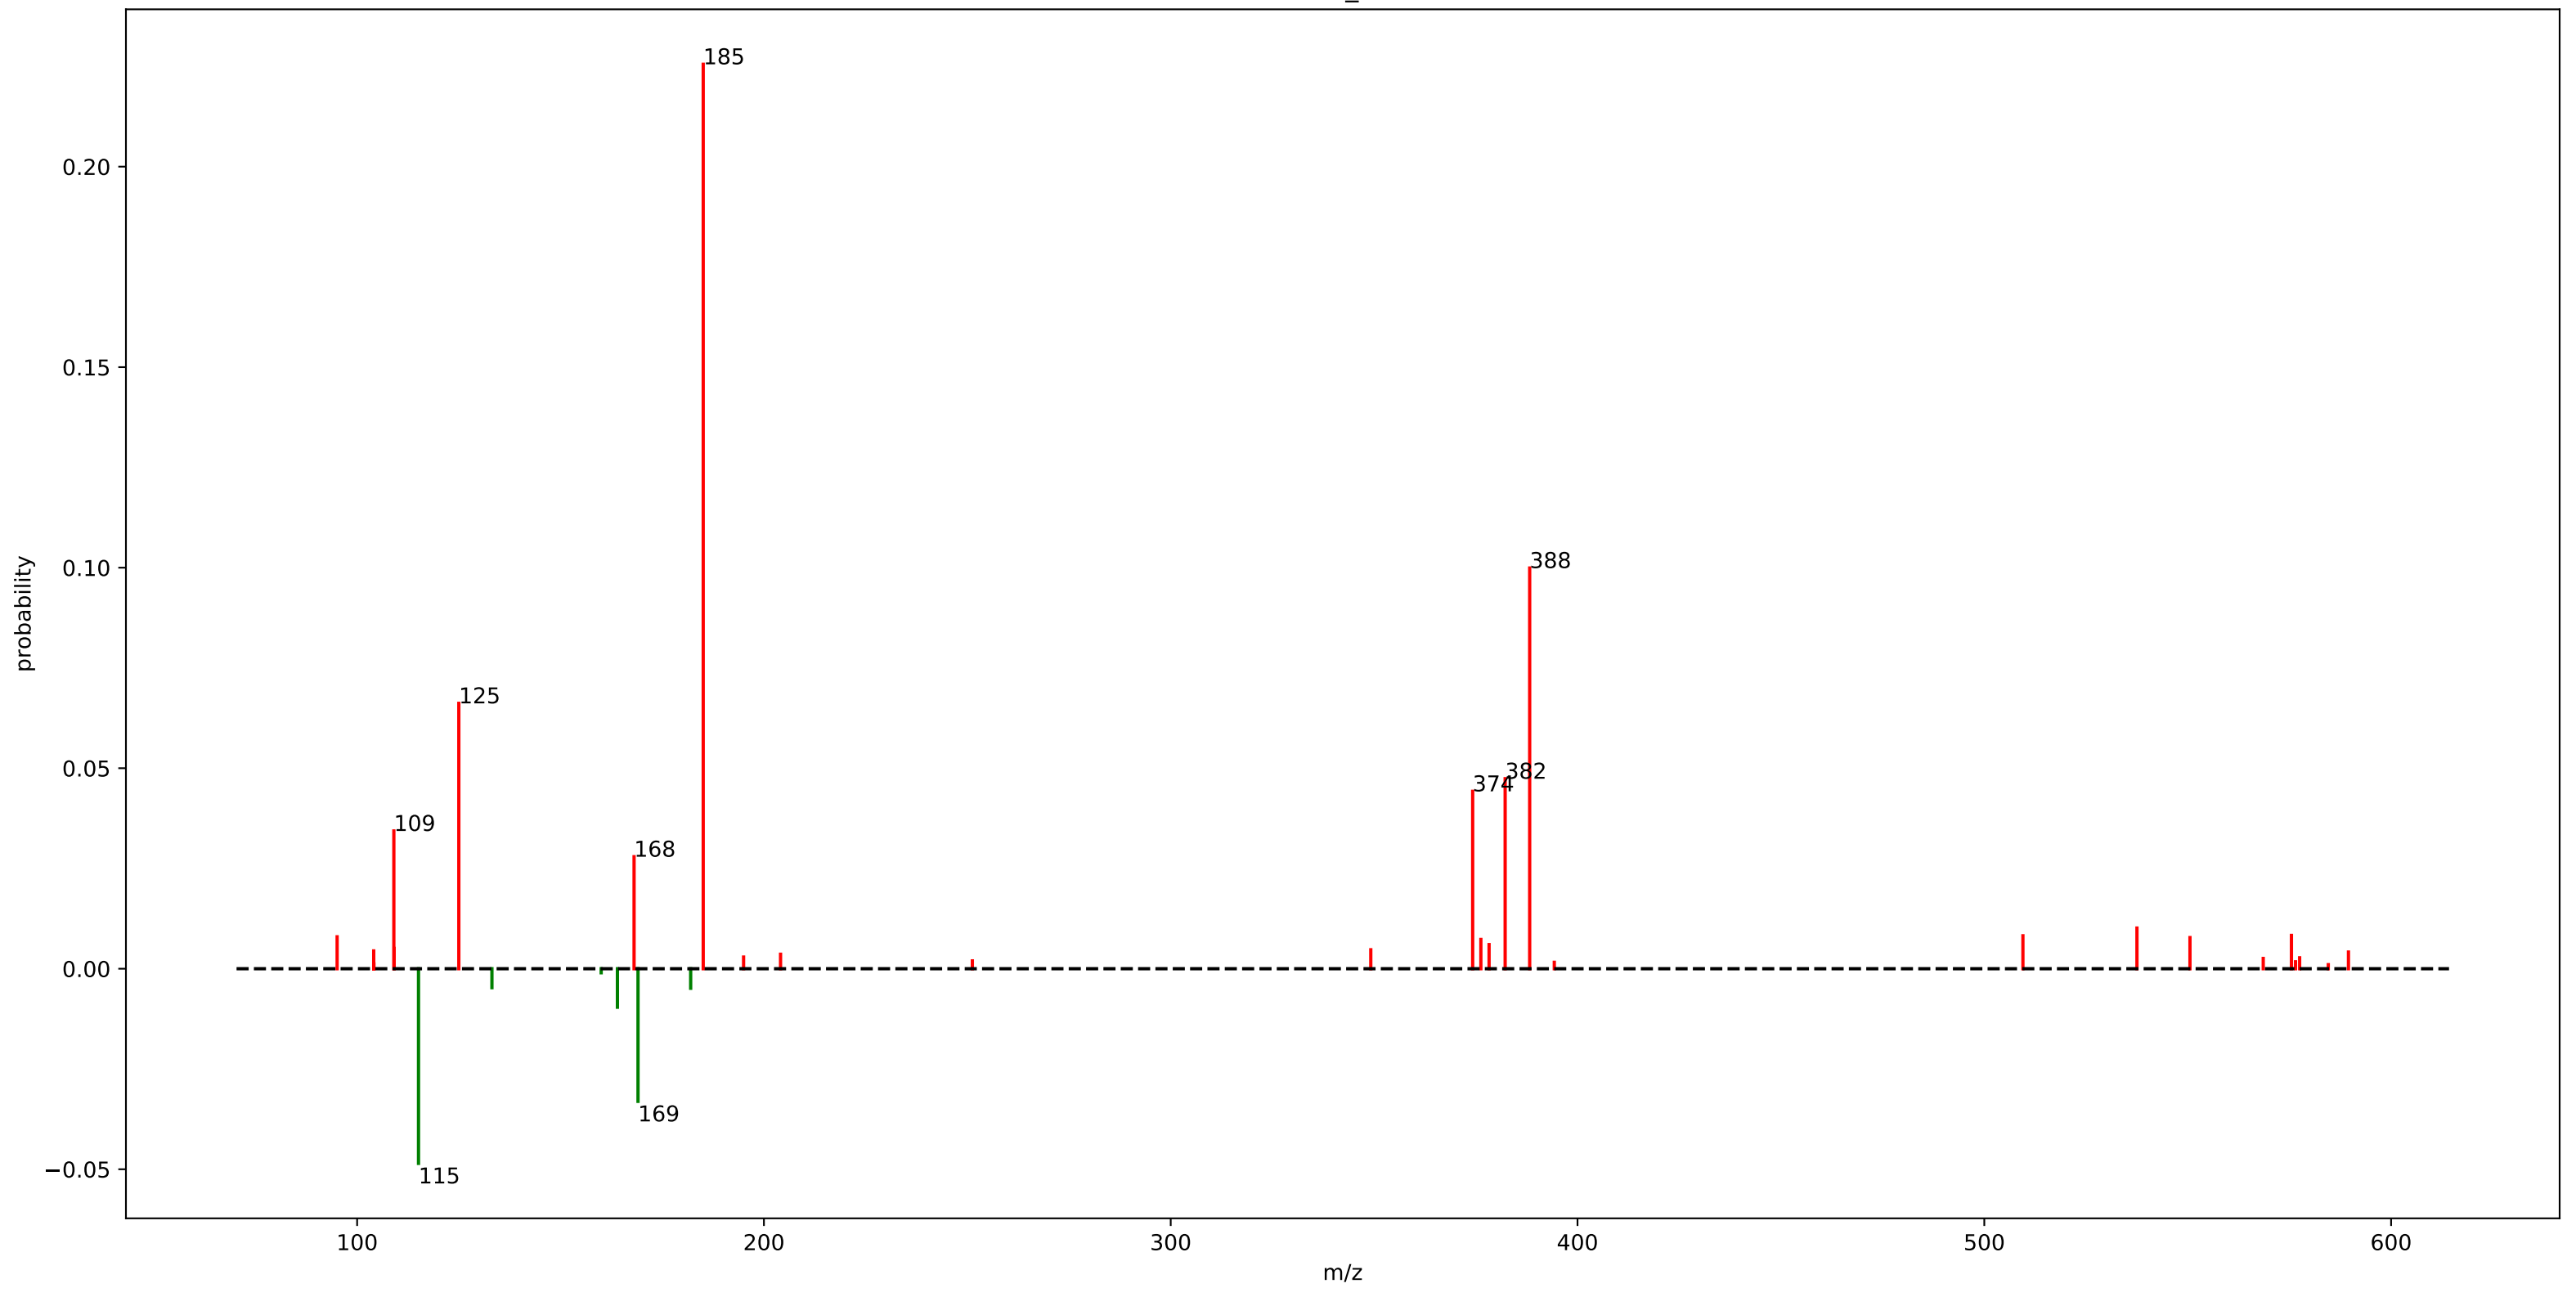

## motif\_543

|                   |        |
|-------------------|--------|
| fragment_185.0775 | : 0.23 |
| fragment_388.2425 | : 0.10 |
| fragment_124.9975 | : 0.07 |
| loss_115.0875     | : 0.05 |
| fragment_382.2125 | : 0.05 |
| fragment_374.2275 | : 0.04 |
| fragment_109.0275 | : 0.03 |
| loss_169.0475     | : 0.03 |
| fragment_168.0775 | : 0.03 |
| fragment_537.5225 | : 0.01 |
| loss_163.9875     | : 0.01 |
| fragment_575.5025 | : 0.01 |
| fragment_509.4925 | : 0.01 |
| fragment_95.0825  | : 0.01 |
| fragment_550.5575 | : 0.01 |
| fragment_376.2425 | : 0.01 |
| fragment_378.2625 | : 0.01 |
| fragment_109.0975 | : 0.01 |

rhabdus\_motif\_91.m2m

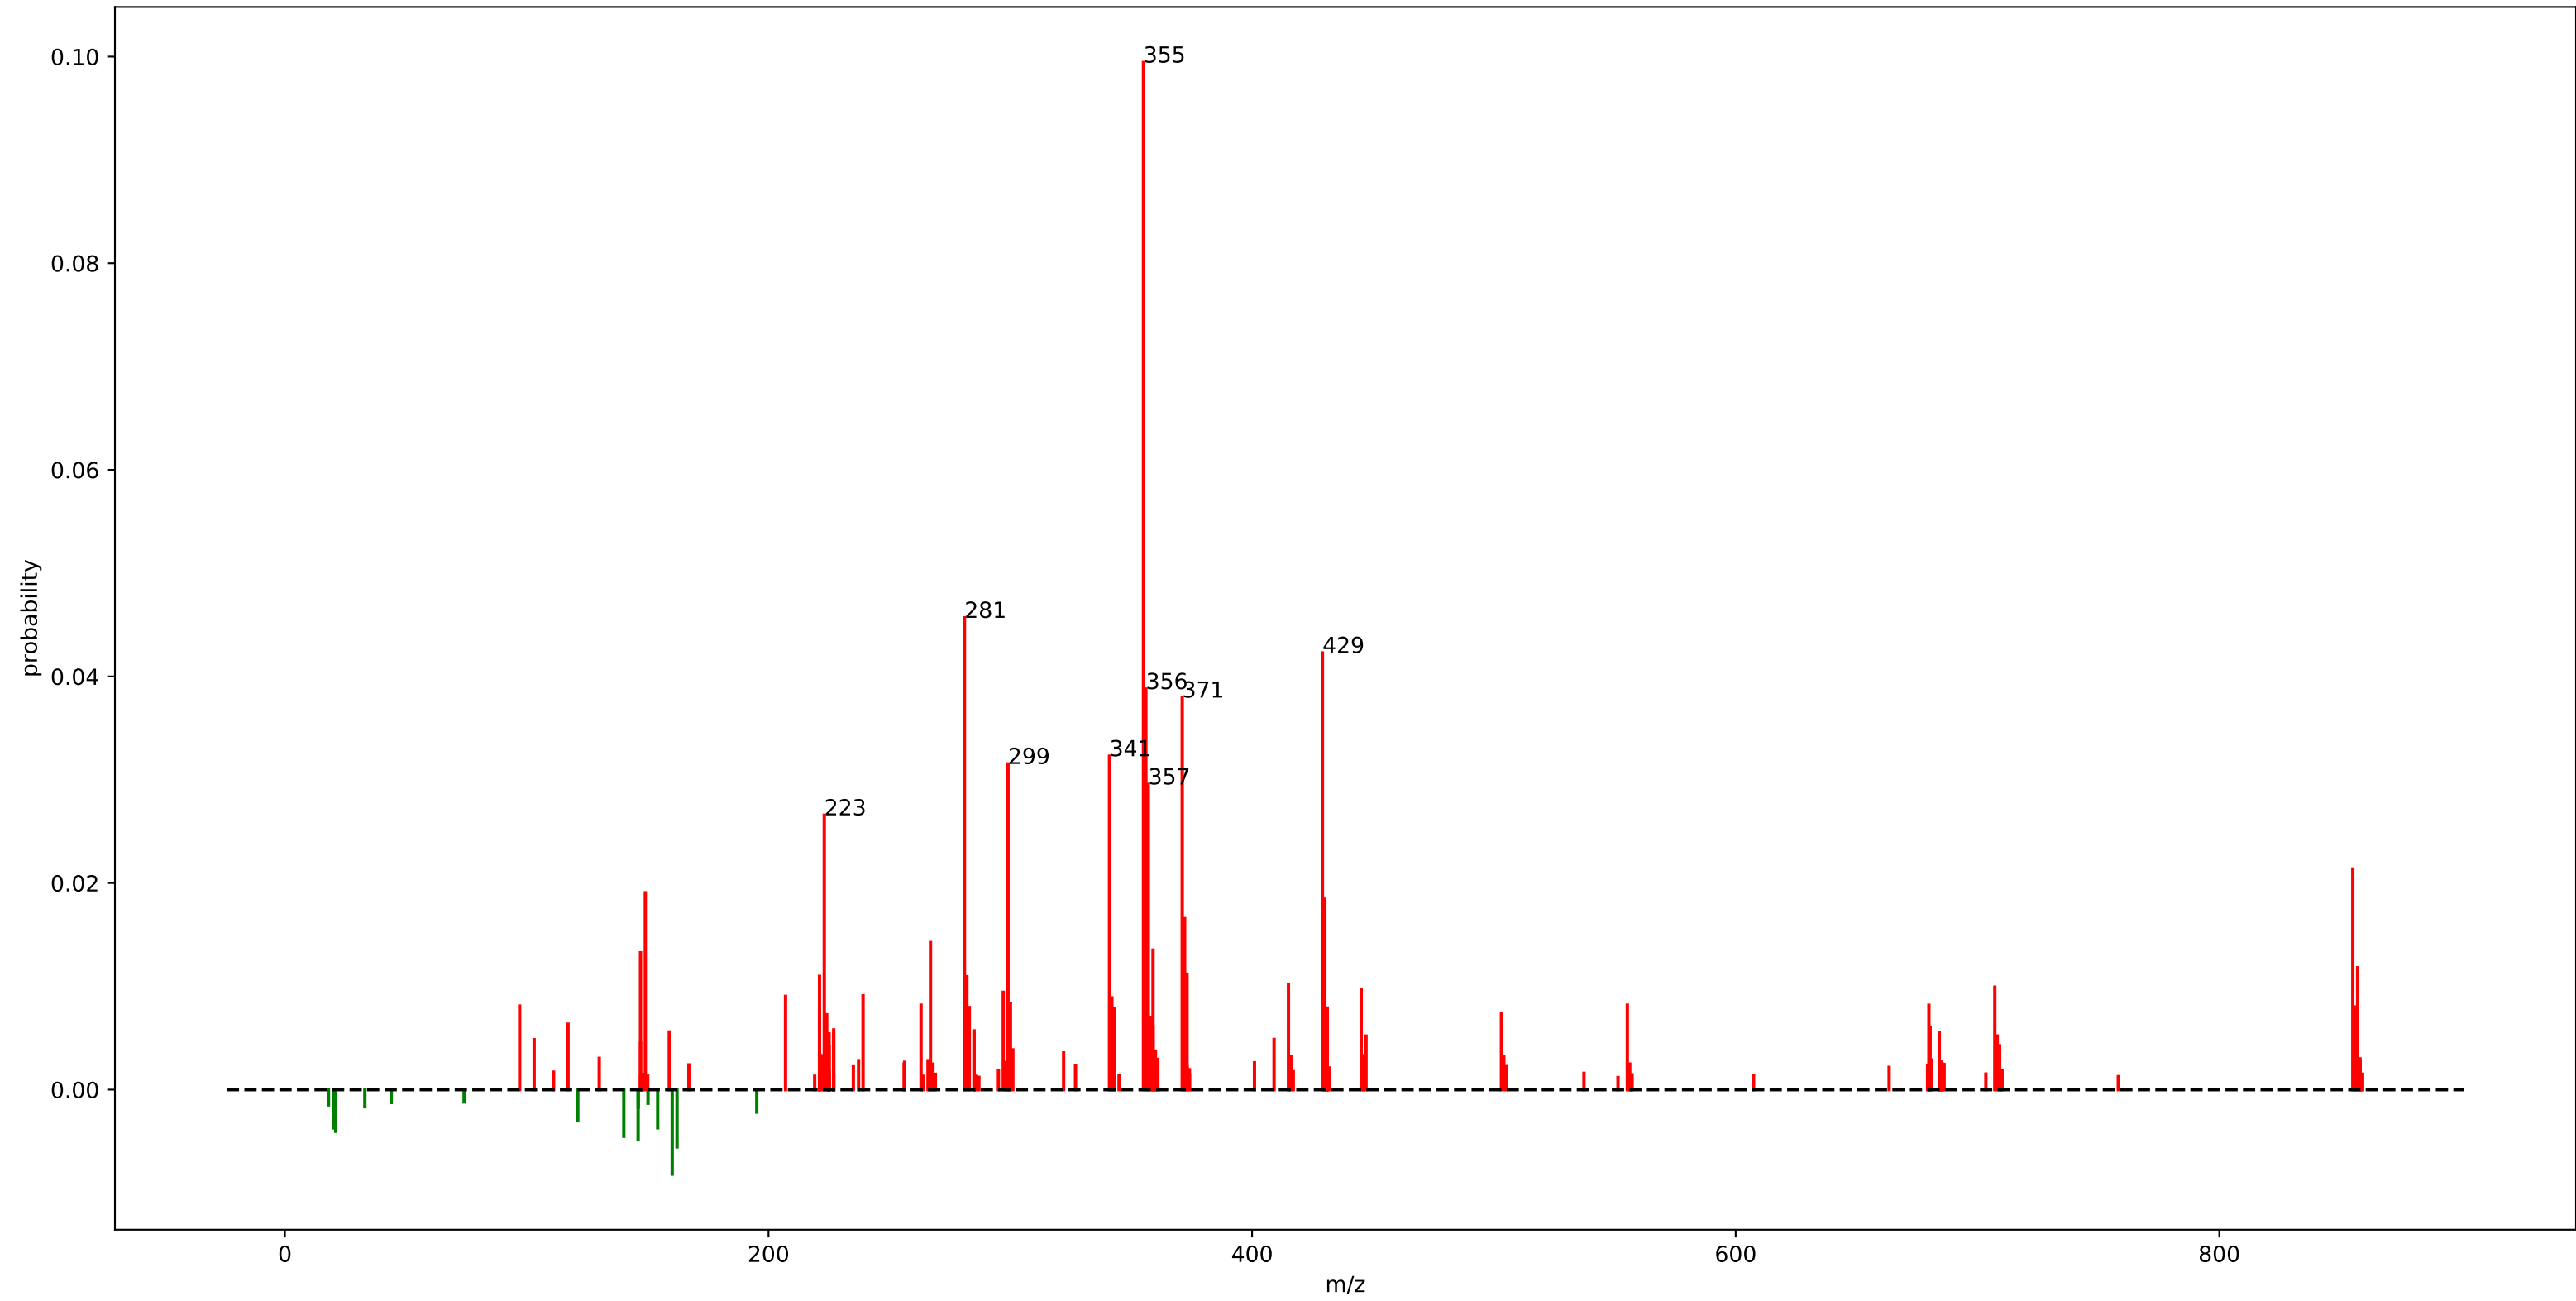

# rhabdus\_motif\_91.m2m

|                   |        |                   |        |                   |        |
|-------------------|--------|-------------------|--------|-------------------|--------|
| fragment_355.0725 | : 0.10 | fragment_415.0375 | : 0.01 | fragment_224.0625 | : 0.01 |
| fragment_281.0525 | : 0.05 | fragment_707.1675 | : 0.01 | fragment_358.0675 | : 0.01 |
| fragment_429.0875 | : 0.04 | fragment_445.1175 | : 0.01 | fragment_117.0875 | : 0.01 |
| fragment_356.0725 | : 0.04 | fragment_297.0825 | : 0.01 | fragment_359.0325 | : 0.01 |
| fragment_371.1025 | : 0.04 | fragment_239.0975 | : 0.01 | fragment_680.4025 | : 0.01 |
| fragment_341.0175 | : 0.03 | fragment_207.0325 | : 0.01 | fragment_226.9525 | : 0.01 |
| fragment_299.0625 | : 0.03 | fragment_342.0175 | : 0.01 | fragment_285.0075 | : 0.01 |
| fragment_357.0675 | : 0.03 | fragment_300.0625 | : 0.01 | fragment_285.0125 | : 0.01 |
| fragment_223.0625 | : 0.03 | fragment_263.0825 | : 0.01 | fragment_158.9625 | : 0.01 |
| fragment_855.2075 | : 0.02 | loss_160.1675     | : 0.01 | loss_162.1625     | : 0.01 |
| fragment_149.0425 | : 0.02 | fragment_555.1875 | : 0.01 | fragment_684.2025 | : 0.01 |
| fragment_430.0875 | : 0.02 | fragment_679.9025 | : 0.01 | fragment_225.0425 | : 0.01 |
| fragment_372.1025 | : 0.02 | fragment_97.0775  | : 0.01 | fragment_226.9575 | : 0.01 |
| fragment_266.9975 | : 0.01 | fragment_856.2075 | : 0.01 | fragment_708.1675 | : 0.01 |
| fragment_359.0275 | : 0.01 | fragment_283.0475 | : 0.01 | fragment_447.1175 | : 0.01 |
| fragment_147.0625 | : 0.01 | fragment_431.0875 | : 0.01 |                   |        |
| fragment_857.2075 | : 0.01 | fragment_221.0875 | : 0.01 |                   |        |
| fragment_373.0975 | : 0.01 | fragment_343.0175 | : 0.01 |                   |        |
| fragment_221.0825 | : 0.01 | fragment_503.1075 | : 0.01 |                   |        |
| fragment_282.0525 | : 0.01 | fragment_856.2125 | : 0.01 |                   |        |

rhamn\_motif\_120.m2m

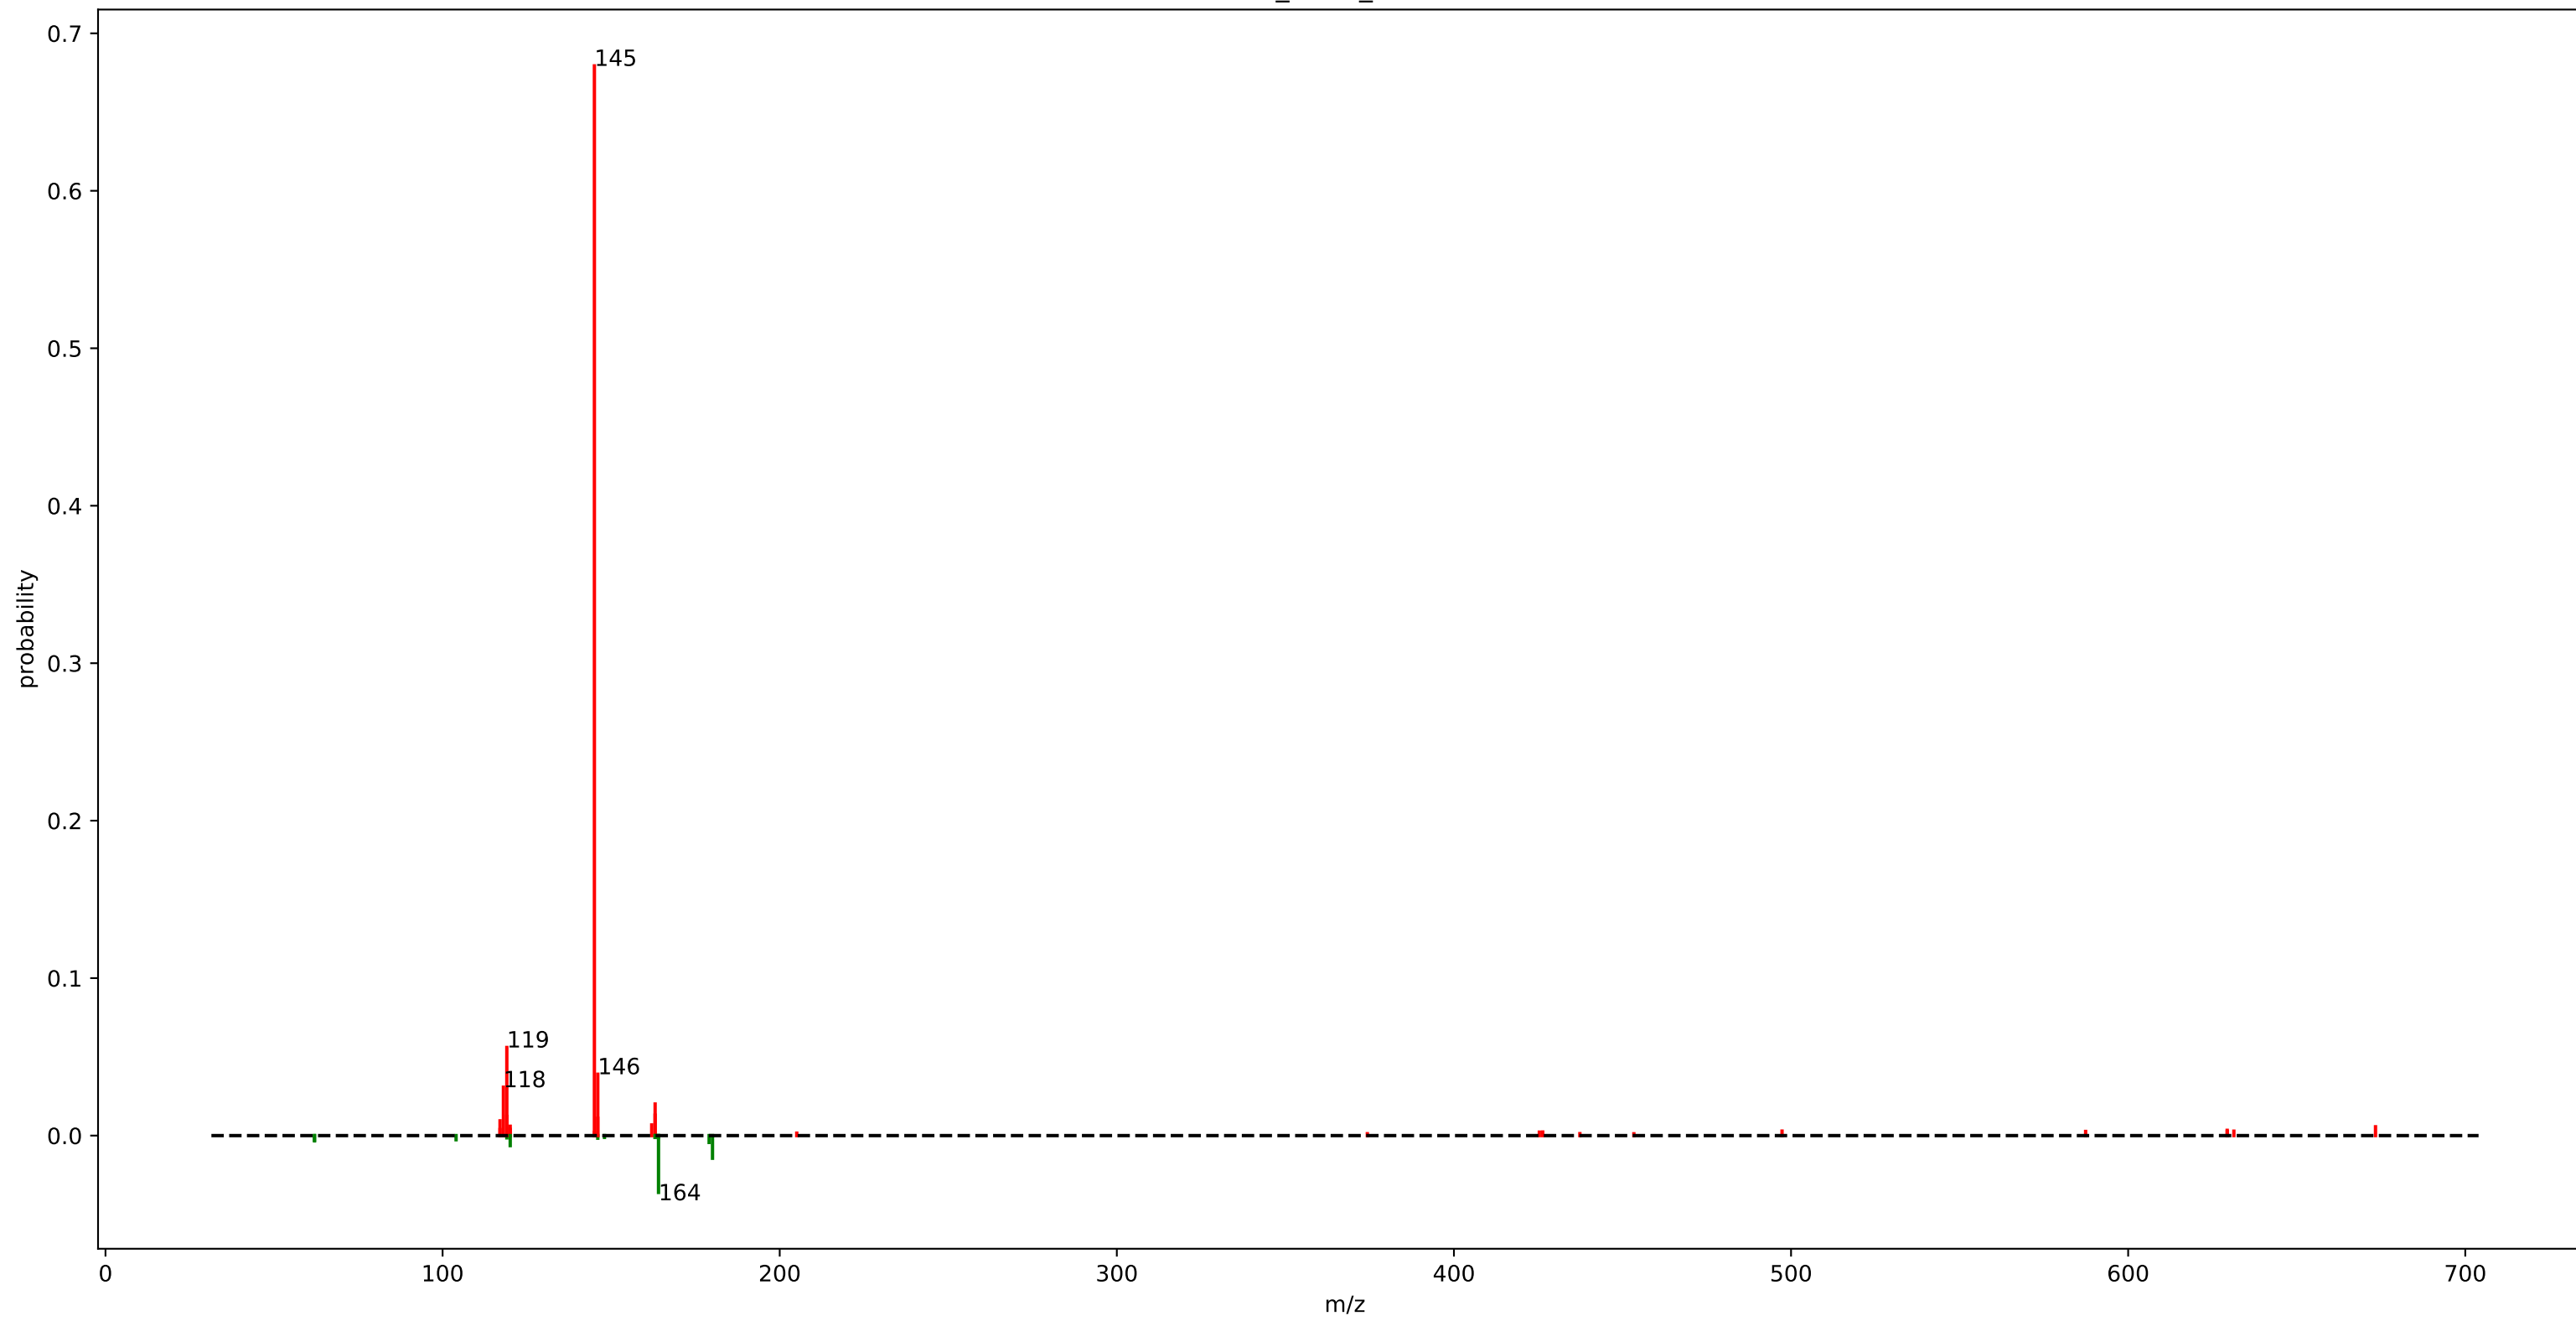

## rhamn\_motif\_120.m2m

|                   |        |
|-------------------|--------|
| fragment_145.0275 | : 0.68 |
| fragment_119.0525 | : 0.06 |
| fragment_146.0325 | : 0.04 |
| loss_164.0475     | : 0.04 |
| fragment_118.0425 | : 0.03 |
| fragment_163.0425 | : 0.02 |
| loss_180.0625     | : 0.01 |
| fragment_163.0375 | : 0.01 |
| fragment_119.0475 | : 0.01 |
| fragment_146.0275 | : 0.01 |
| fragment_117.0375 | : 0.01 |
| fragment_162.0325 | : 0.01 |
| loss_120.0575     | : 0.01 |
| fragment_120.0475 | : 0.01 |
| fragment_673.3725 | : 0.01 |

euphorbia\_motif\_62.m2m

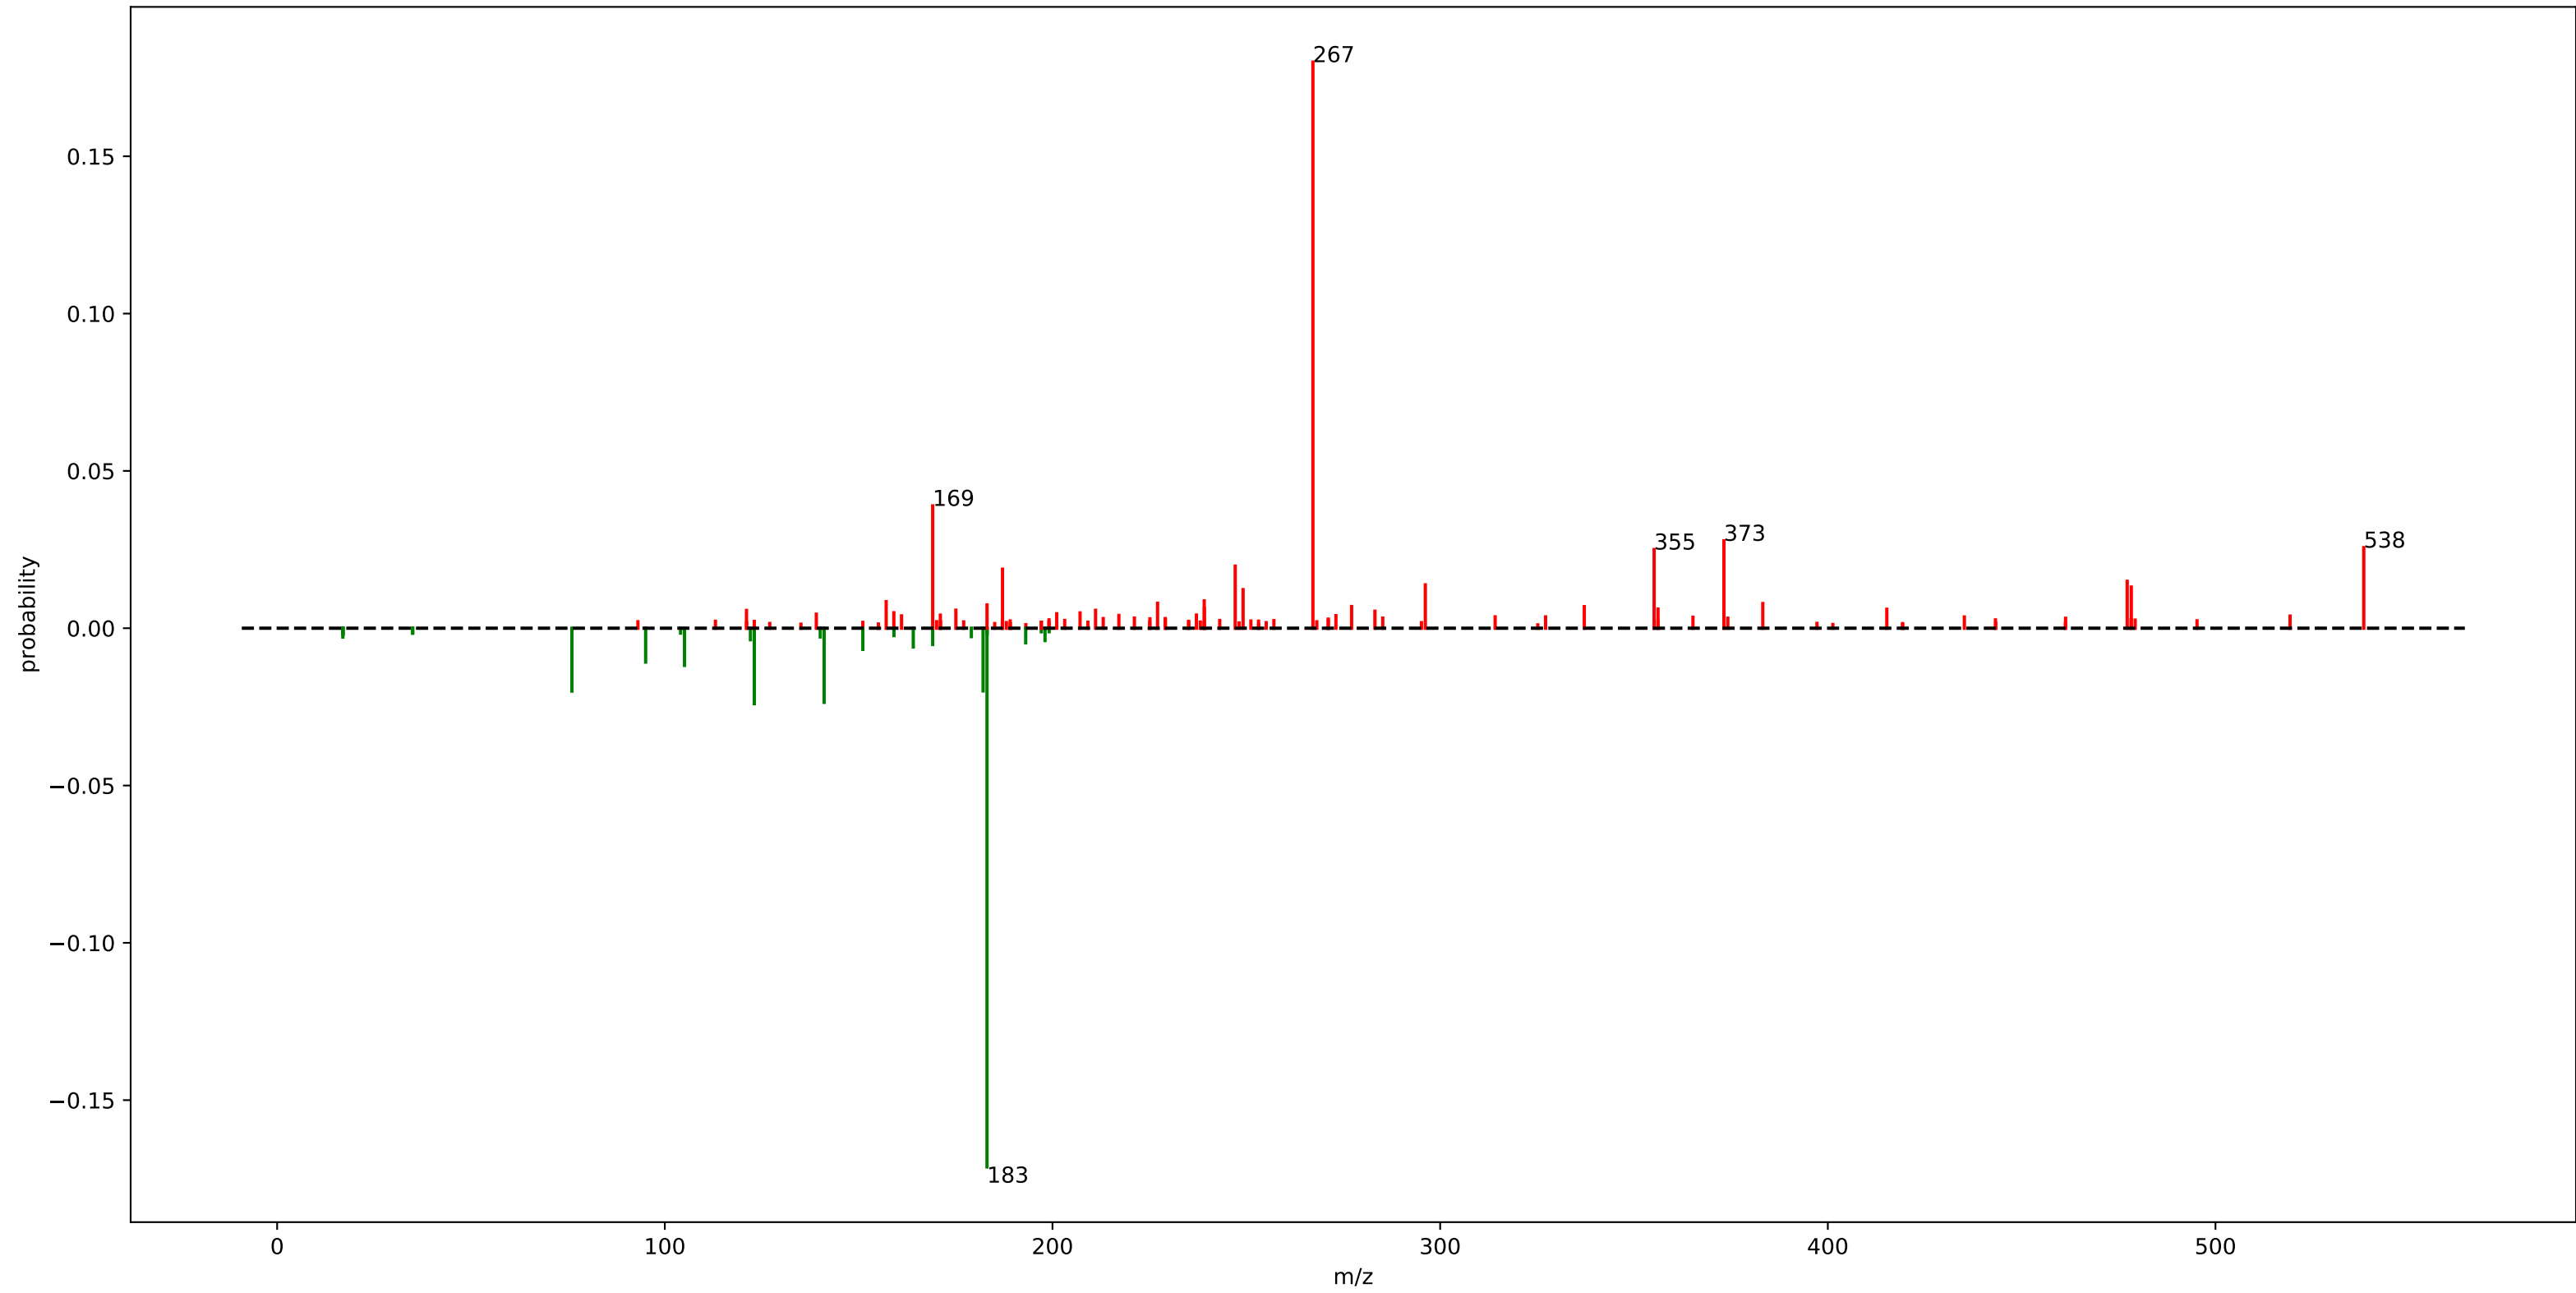

# euphorbia\_motif\_62.m2m

|                   |        |                   |        |
|-------------------|--------|-------------------|--------|
| fragment_267.1775 | : 0.18 | fragment_227.1075 | : 0.01 |
| loss_183.1075     | : 0.17 | fragment_383.2225 | : 0.01 |
| fragment_169.1025 | : 0.04 | fragment_183.1175 | : 0.01 |
| fragment_373.2025 | : 0.03 | fragment_277.1625 | : 0.01 |
| fragment_538.2575 | : 0.03 | fragment_337.1825 | : 0.01 |
| fragment_355.1925 | : 0.03 | loss_151.0825     | : 0.01 |
| loss_123.0875     | : 0.02 | fragment_239.1825 | : 0.01 |
| loss_141.0975     | : 0.02 | fragment_356.1975 | : 0.01 |
| loss_76.0375      | : 0.02 | fragment_415.2175 | : 0.01 |
| loss_182.1025     | : 0.02 | loss_164.0925     | : 0.01 |
| fragment_247.1375 | : 0.02 | fragment_175.0775 | : 0.01 |
| fragment_187.1125 | : 0.02 | fragment_211.1125 | : 0.01 |
| fragment_477.2325 | : 0.01 | fragment_121.0675 | : 0.01 |
| fragment_296.1775 | : 0.01 | fragment_283.1725 | : 0.01 |
| fragment_478.2825 | : 0.01 | loss_169.0975     | : 0.01 |
| fragment_249.1675 | : 0.01 |                   |        |
| loss_105.0775     | : 0.01 |                   |        |
| loss_95.0575      | : 0.01 |                   |        |
| fragment_239.1425 | : 0.01 |                   |        |
| fragment_157.1025 | : 0.01 |                   |        |



urine\_mass2motif\_279.m2m

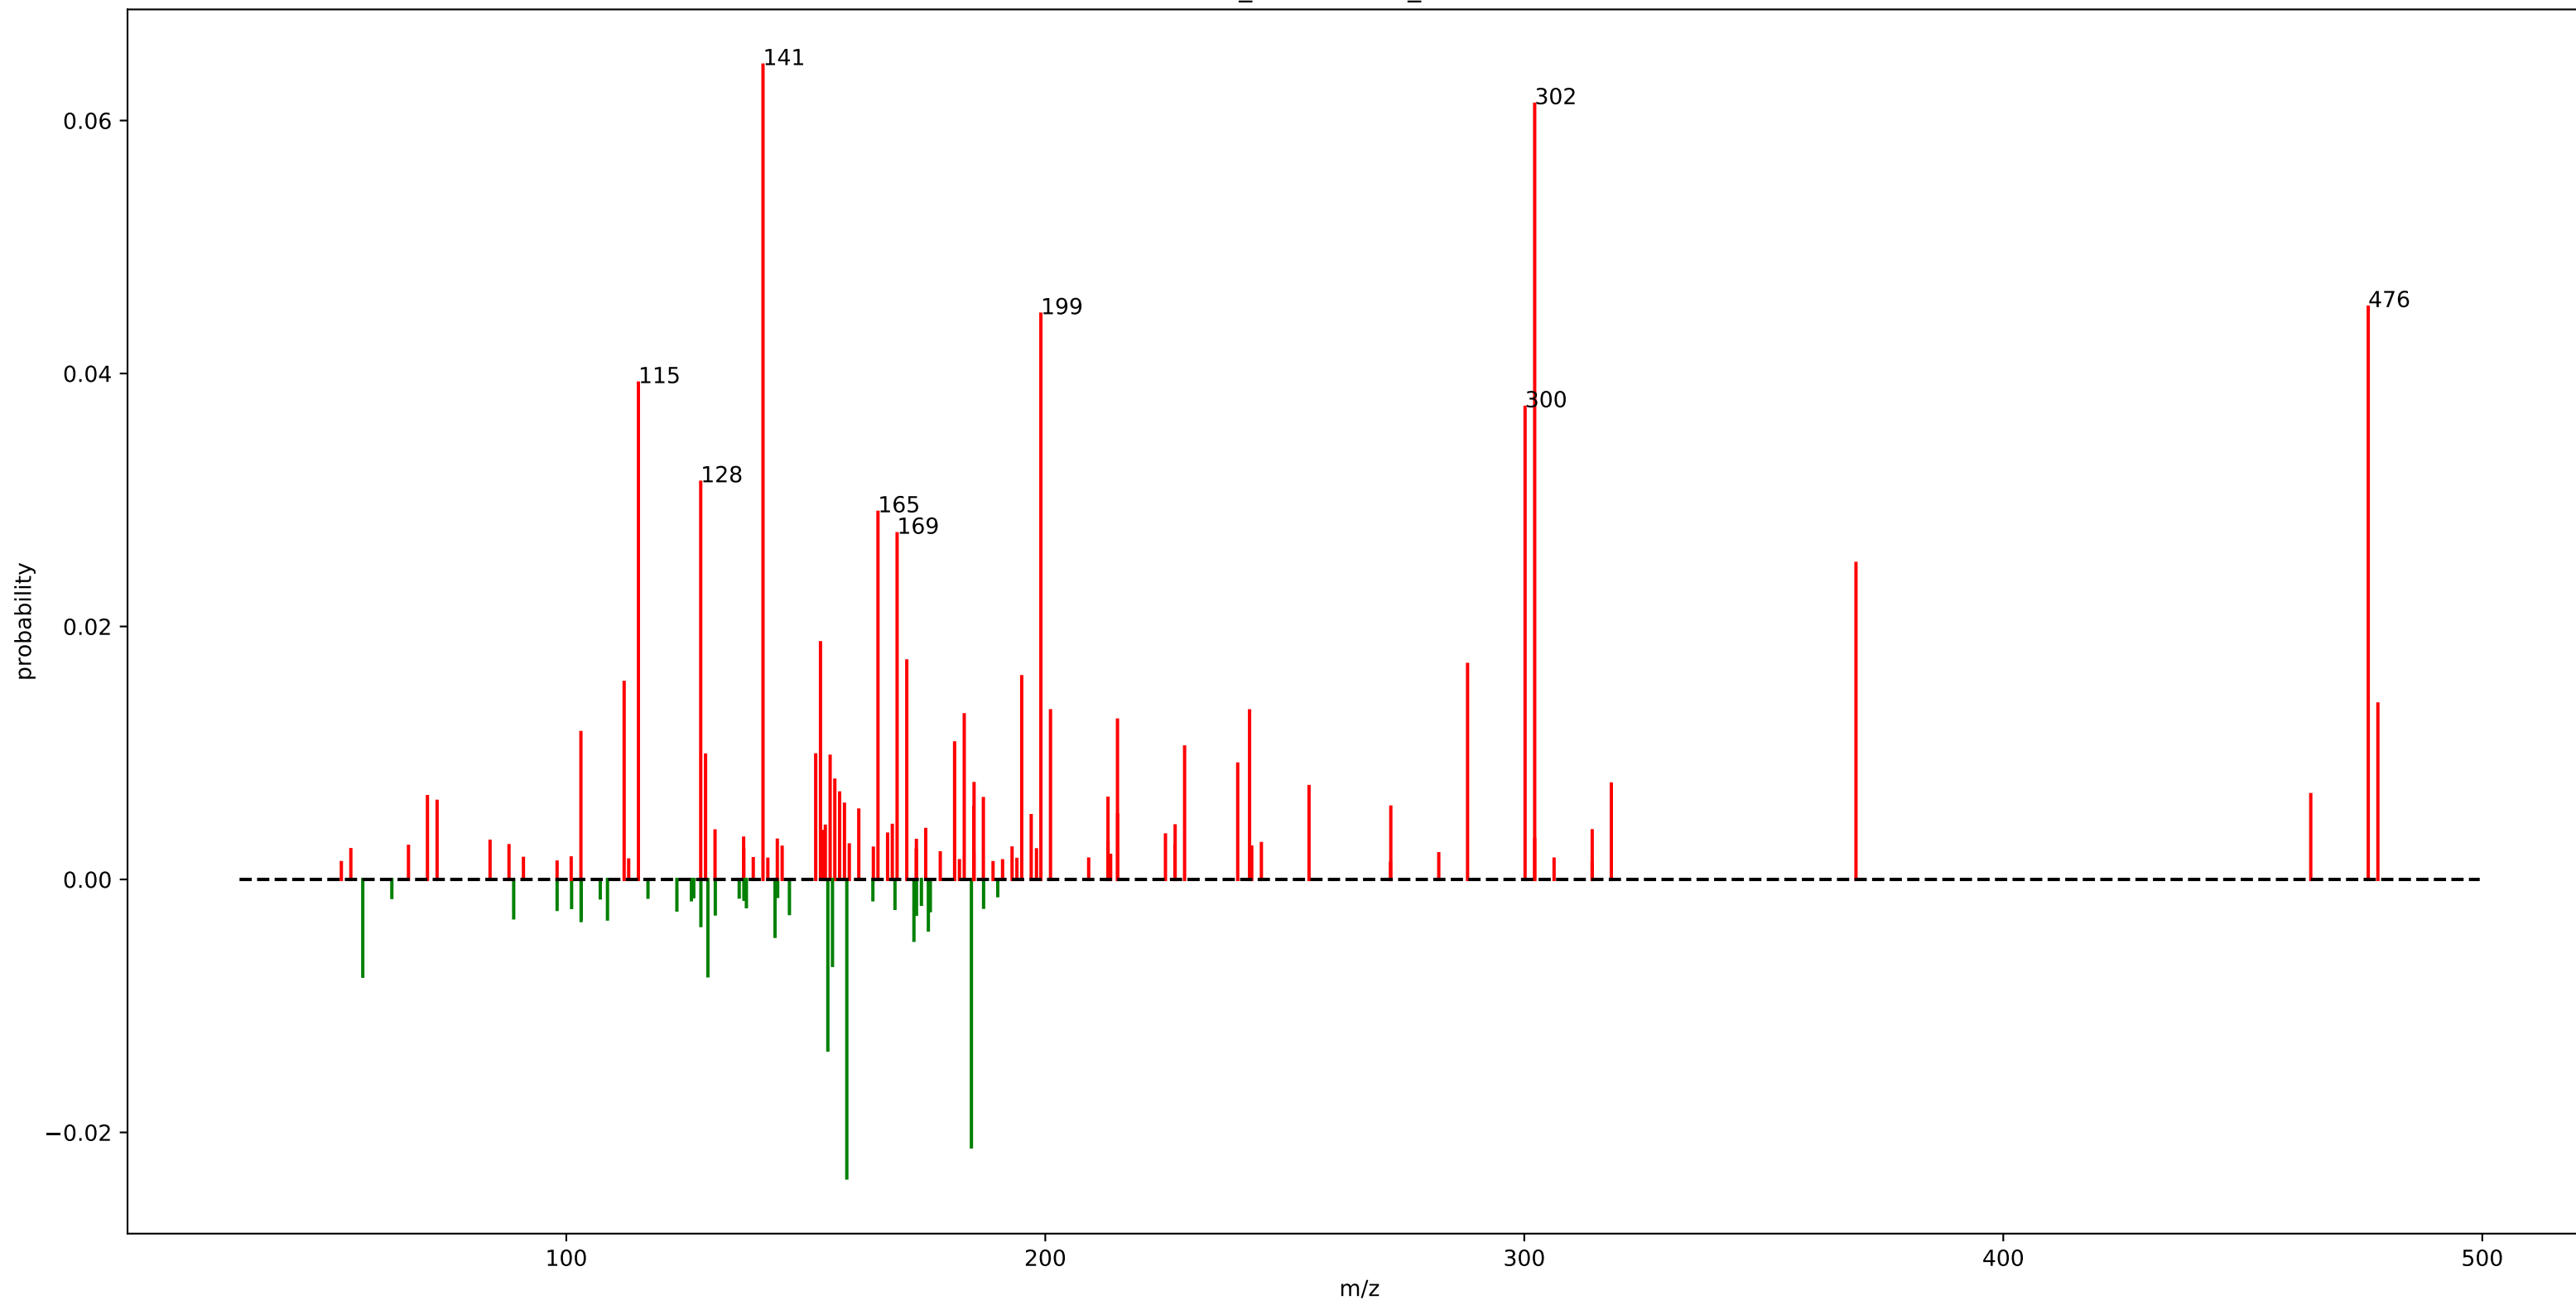

# urine\_mass2motif\_279.m2m

|                   |        |                   |        |                   |        |
|-------------------|--------|-------------------|--------|-------------------|--------|
| fragment_141.0675 | : 0.06 | fragment_242.6425 | : 0.01 | fragment_213.0875 | : 0.01 |
| fragment_302.1725 | : 0.06 | fragment_183.0775 | : 0.01 | fragment_187.0725 | : 0.01 |
| fragment_476.1925 | : 0.05 | fragment_215.0725 | : 0.01 | fragment_73.0275  | : 0.01 |
| fragment_199.0775 | : 0.04 | fragment_103.0525 | : 0.01 | fragment_158.0725 | : 0.01 |
| fragment_115.0525 | : 0.04 | fragment_181.0675 | : 0.01 | fragment_272.1325 | : 0.01 |
| fragment_300.1625 | : 0.04 | fragment_229.0825 | : 0.01 | fragment_185.0625 | : 0.01 |
| fragment_128.0625 | : 0.03 | fragment_152.0675 | : 0.01 | fragment_161.0625 | : 0.01 |
| fragment_165.0675 | : 0.03 | fragment_129.0725 | : 0.01 | fragment_215.1025 | : 0.01 |
| fragment_169.0625 | : 0.03 | fragment_155.0825 | : 0.01 | fragment_197.0575 | : 0.01 |
| fragment_369.2475 | : 0.02 | fragment_240.1725 | : 0.01 |                   |        |
| loss_158.5625     | : 0.02 | fragment_156.0575 | : 0.01 |                   |        |
| loss_184.5775     | : 0.02 | loss_57.5125      | : 0.01 |                   |        |
| fragment_153.0675 | : 0.02 | loss_129.5575     | : 0.01 |                   |        |
| fragment_171.0825 | : 0.02 | fragment_185.1275 | : 0.01 |                   |        |
| fragment_288.1575 | : 0.02 | fragment_318.1725 | : 0.01 |                   |        |
| fragment_195.0775 | : 0.02 | fragment_255.0625 | : 0.01 |                   |        |
| fragment_112.0775 | : 0.02 | fragment_157.0625 | : 0.01 |                   |        |
| fragment_478.2075 | : 0.01 | loss_155.5725     | : 0.01 |                   |        |
| loss_154.6025     | : 0.01 | fragment_464.1925 | : 0.01 |                   |        |
| fragment_201.0875 | : 0.01 | fragment_71.0125  | : 0.01 |                   |        |

euphorbia\_motif\_346.m2m

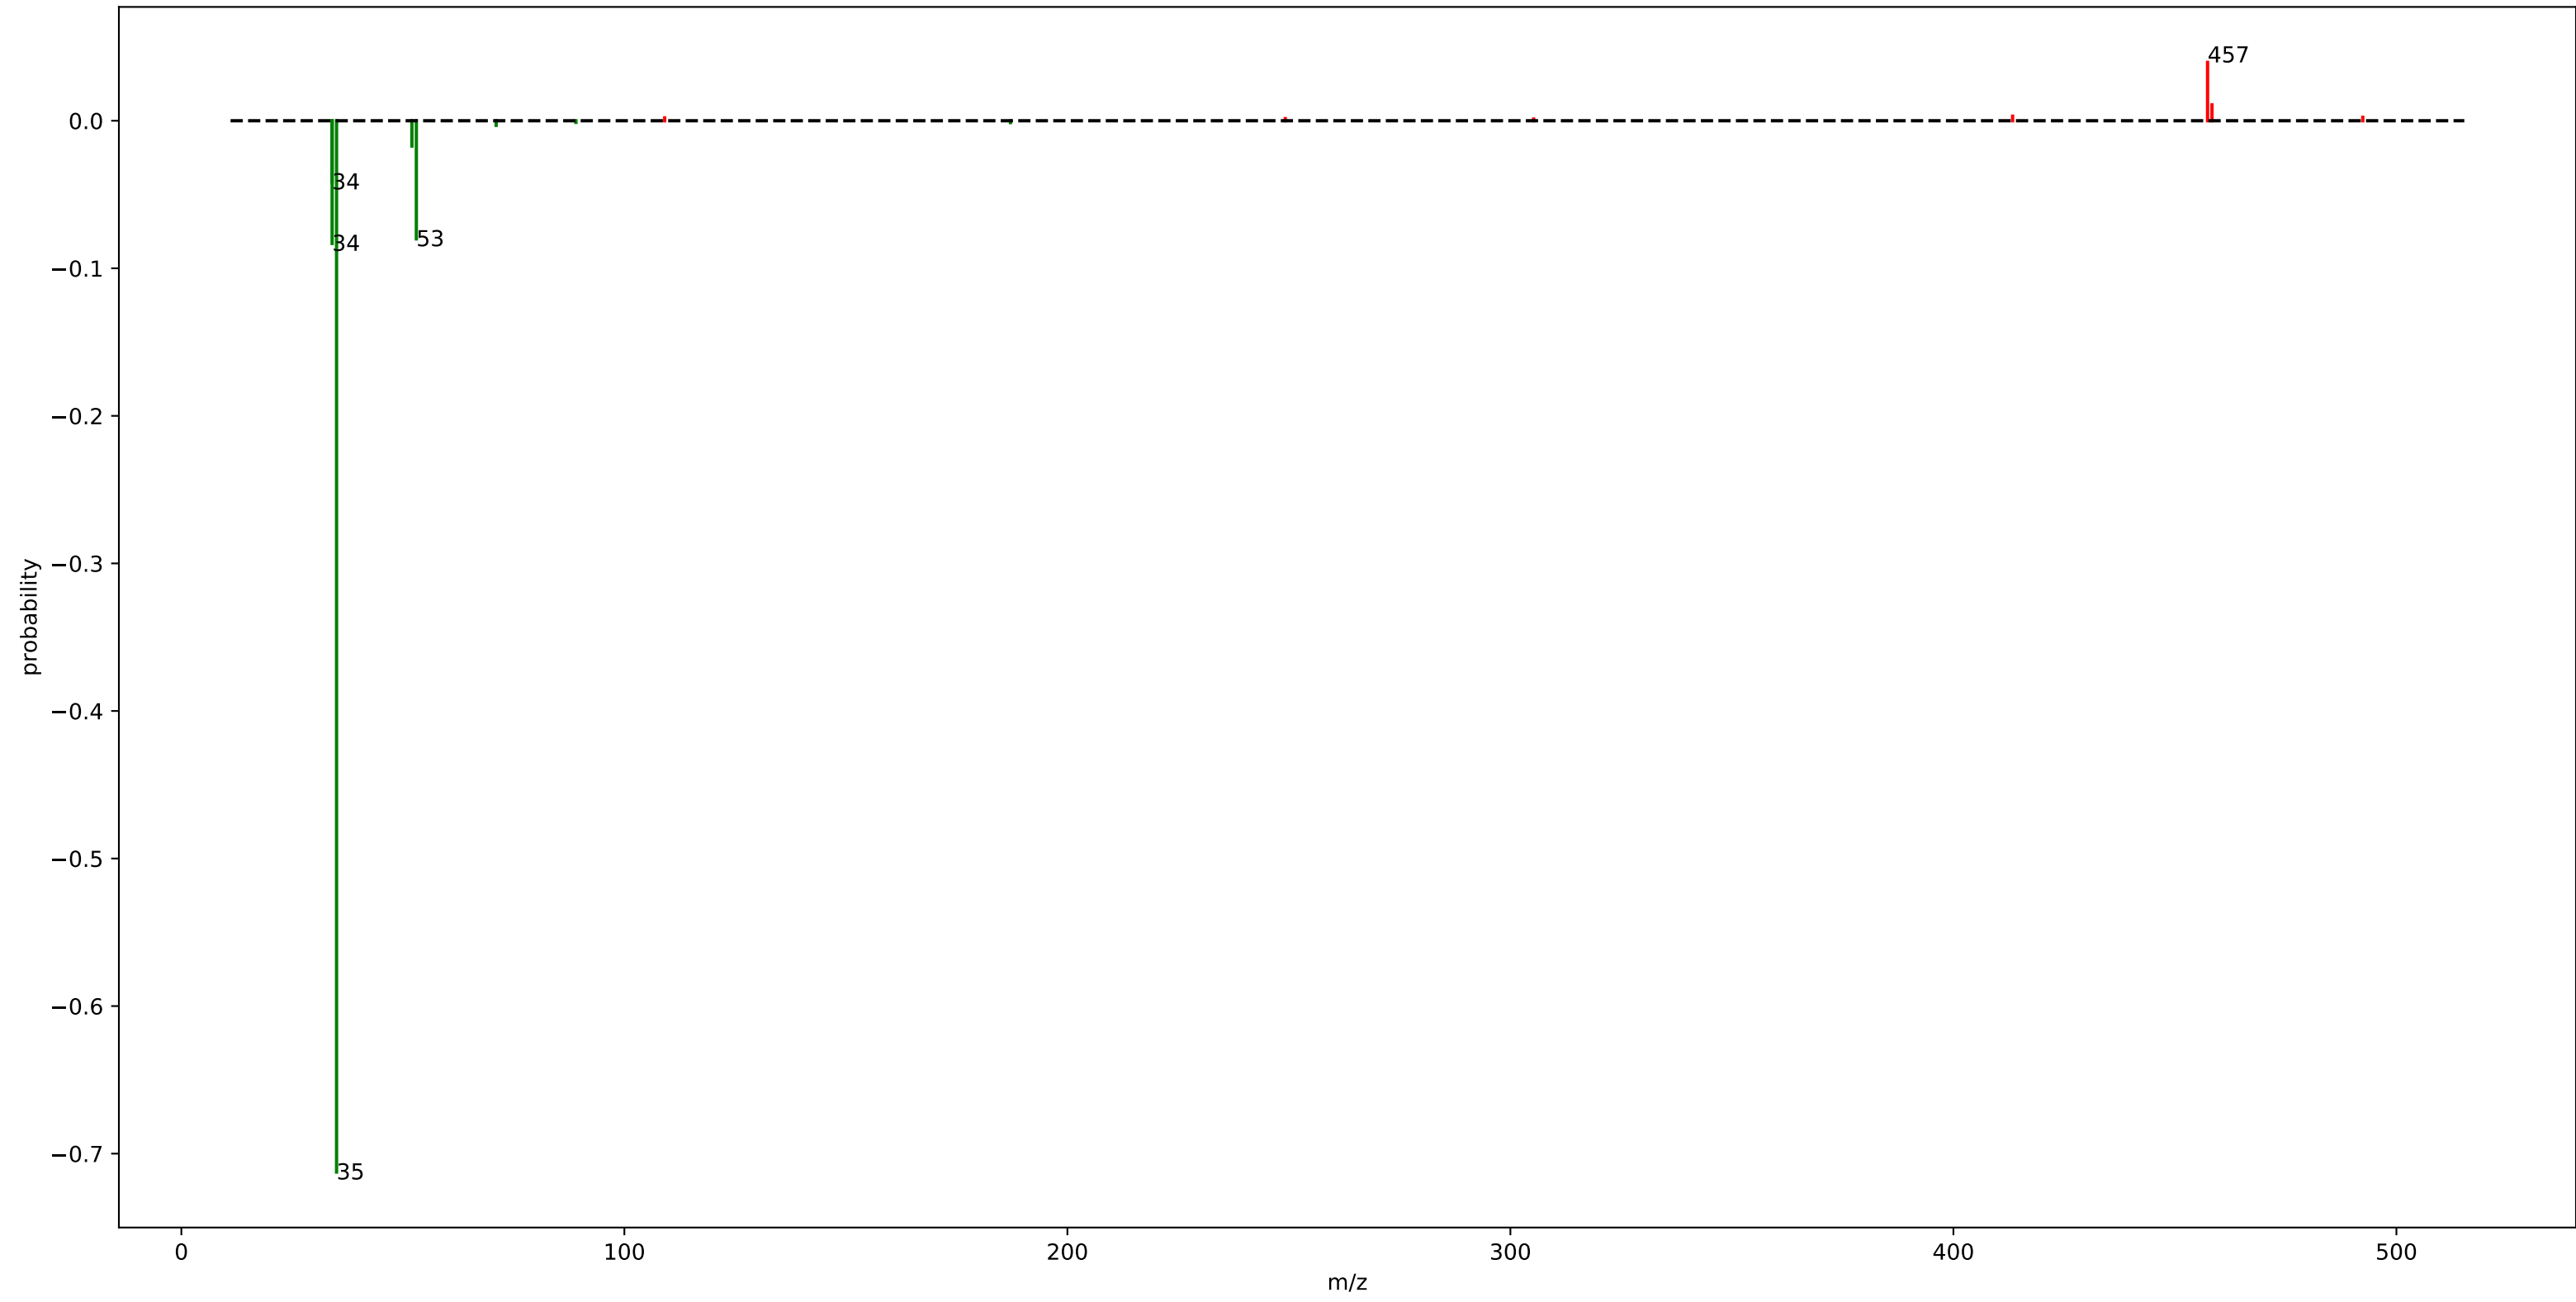

# euphorbia\_motif\_346.m2m

|                   |        |
|-------------------|--------|
| loss_35.0325      | : 0.71 |
| loss_34.0325      | : 0.08 |
| loss_53.0425      | : 0.08 |
| loss_34.0275      | : 0.04 |
| fragment_457.3725 | : 0.04 |
| loss_52.0425      | : 0.02 |
| fragment_458.3725 | : 0.01 |

gnps\_motif\_69.m2m

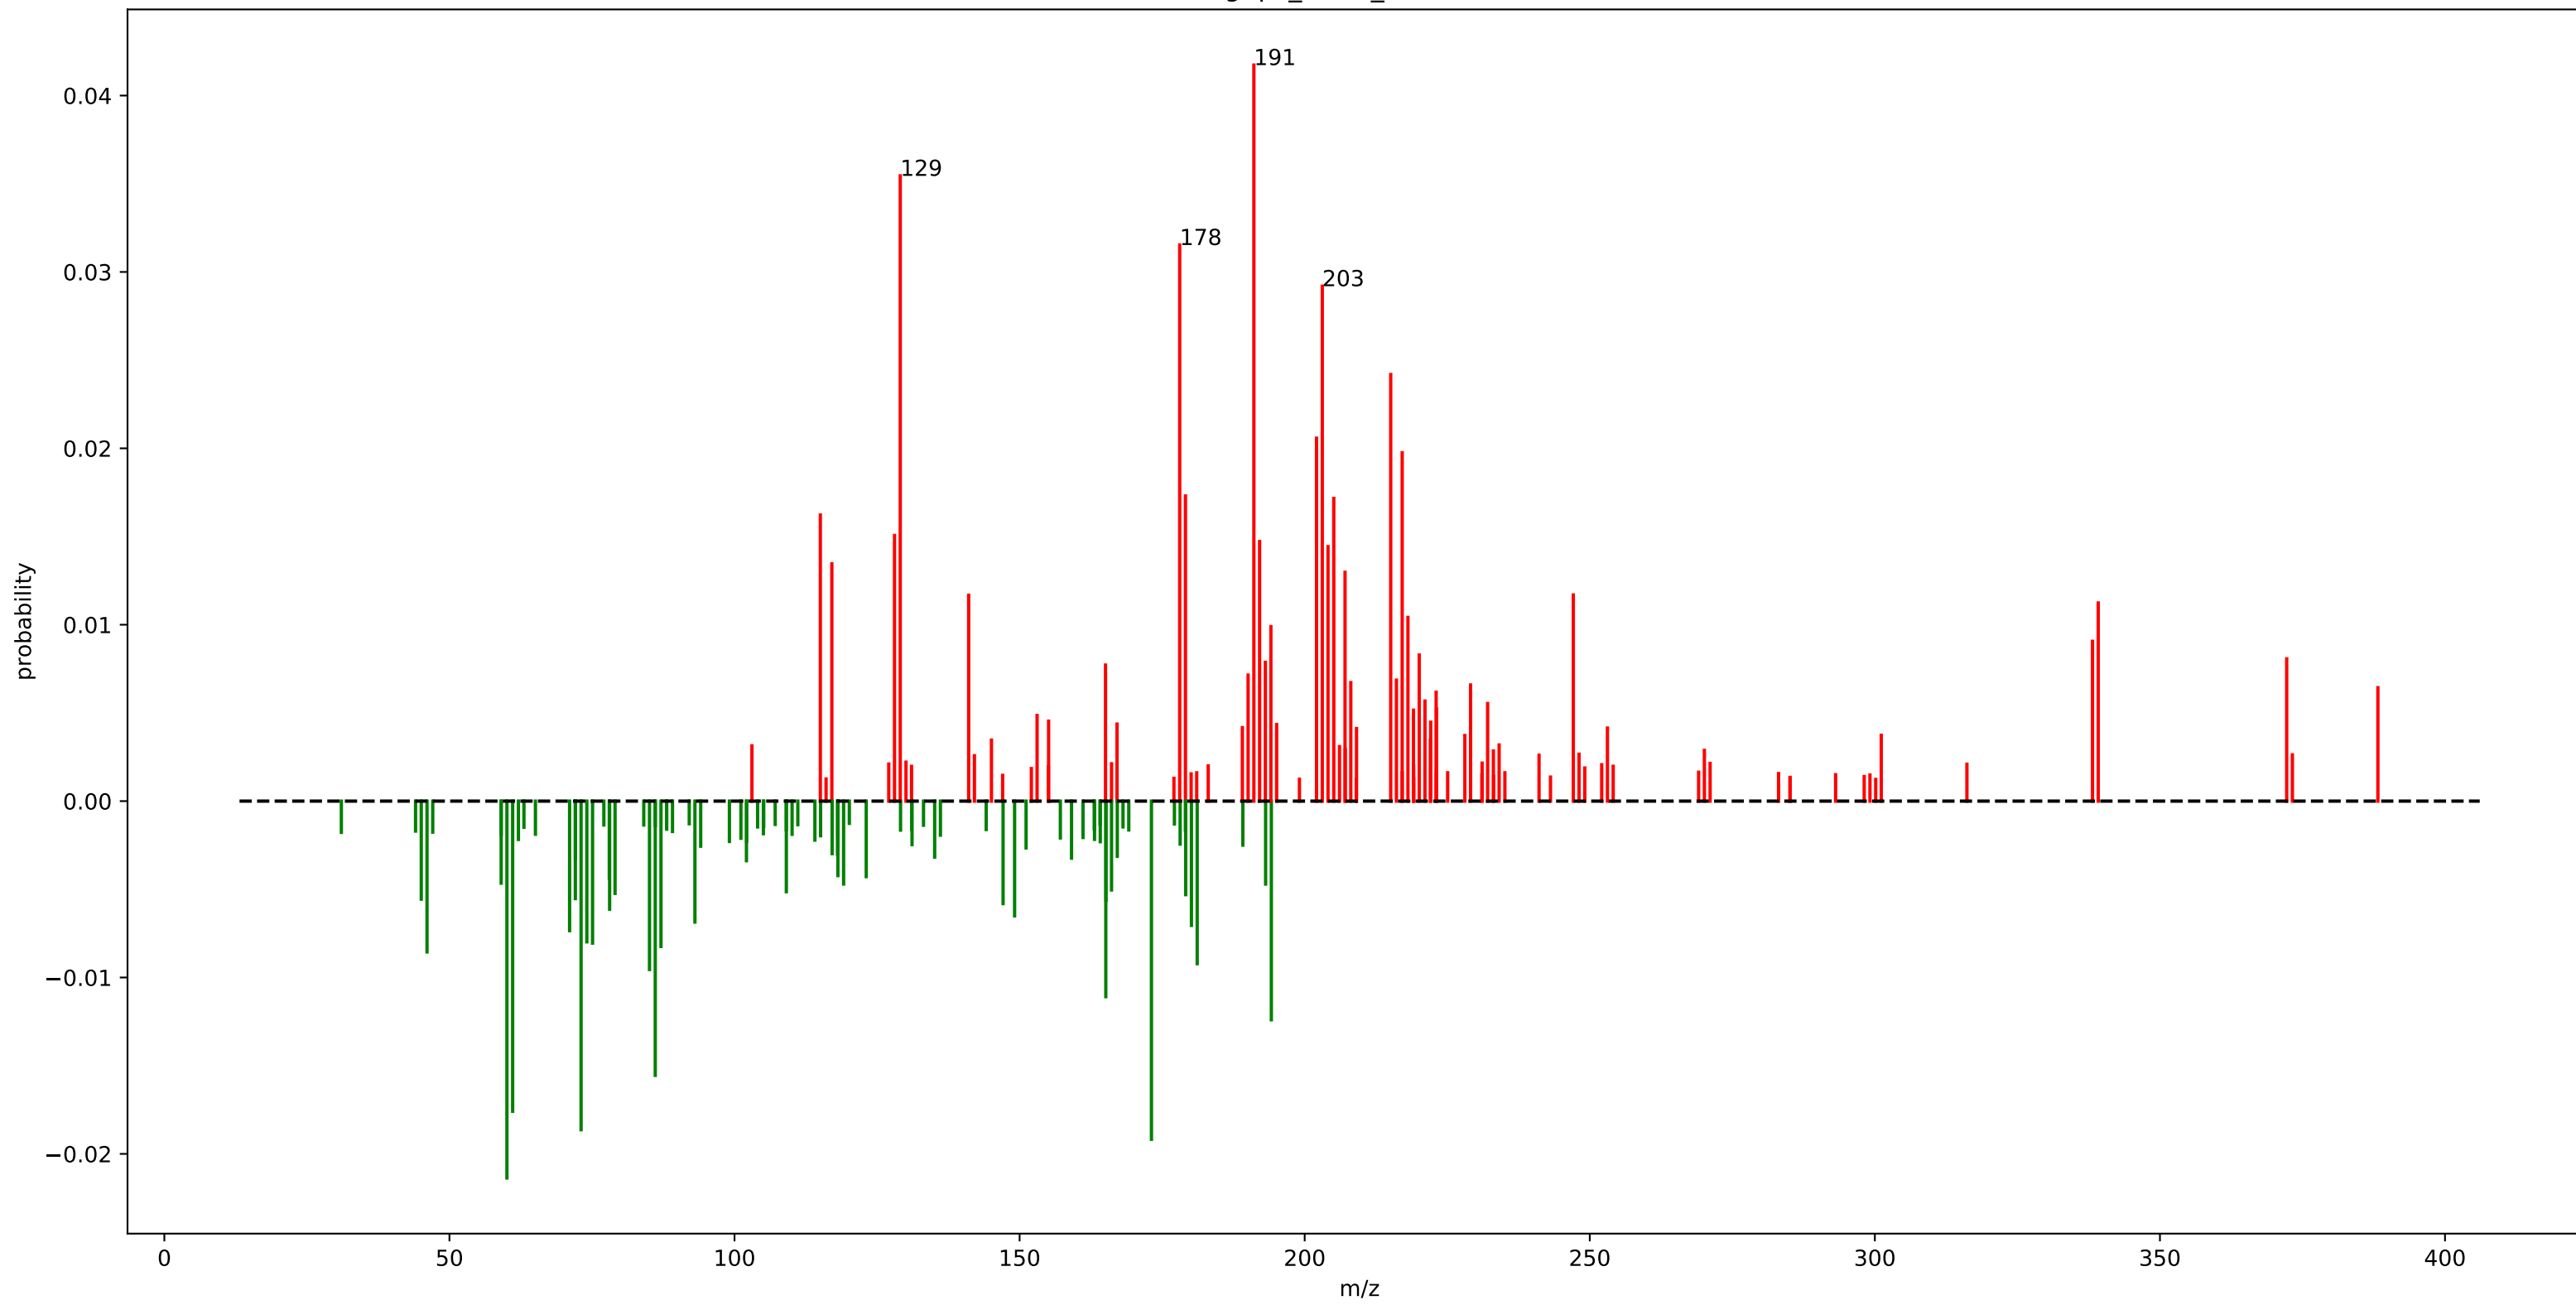

# gnps\_motif\_69.m2m

|                   |        |                   |        |                   |        |               |        |
|-------------------|--------|-------------------|--------|-------------------|--------|---------------|--------|
| fragment_191.0875 | : 0.04 | loss_194.1525     | : 0.01 | loss_180.1375     | : 0.01 | loss_166.1225 | : 0.01 |
| fragment_129.0675 | : 0.04 | fragment_247.1125 | : 0.01 | loss_93.0575      | : 0.01 |               |        |
| fragment_178.0775 | : 0.03 | fragment_141.0675 | : 0.01 | fragment_216.0925 | : 0.01 |               |        |
| fragment_203.0875 | : 0.03 | fragment_339.1775 | : 0.01 | fragment_208.0875 | : 0.01 |               |        |
| fragment_215.0875 | : 0.02 | loss_165.1175     | : 0.01 | fragment_229.0975 | : 0.01 |               |        |
| loss_60.0825      | : 0.02 | fragment_218.1075 | : 0.01 | loss_149.1225     | : 0.01 |               |        |
| fragment_202.0775 | : 0.02 | fragment_194.0725 | : 0.01 | fragment_388.2275 | : 0.01 |               |        |
| fragment_217.1025 | : 0.02 | loss_85.0875      | : 0.01 | fragment_223.0575 | : 0.01 |               |        |
| loss_173.1225     | : 0.02 | loss_181.1475     | : 0.01 | loss_78.0925      | : 0.01 |               |        |
| loss_73.0875      | : 0.02 | fragment_338.1775 | : 0.01 | loss_147.1025     | : 0.01 |               |        |
| loss_61.0875      | : 0.02 | loss_46.0675      | : 0.01 | fragment_221.0975 | : 0.01 |               |        |
| fragment_179.0875 | : 0.02 | fragment_220.0875 | : 0.01 | loss_165.1525     | : 0.01 |               |        |
| fragment_205.1025 | : 0.02 | loss_87.1025      | : 0.01 | loss_45.0575      | : 0.01 |               |        |
| fragment_115.0525 | : 0.02 | fragment_372.2325 | : 0.01 | fragment_232.0875 | : 0.01 |               |        |
| loss_86.0975      | : 0.02 | loss_75.1025      | : 0.01 | loss_72.0825      | : 0.01 |               |        |
| fragment_128.0625 | : 0.02 | loss_74.0975      | : 0.01 | loss_179.1325     | : 0.01 |               |        |
| fragment_192.0925 | : 0.01 | fragment_193.1025 | : 0.01 | loss_79.0475      | : 0.01 |               |        |
| fragment_204.0925 | : 0.01 | fragment_165.0675 | : 0.01 | fragment_223.1125 | : 0.01 |               |        |
| fragment_117.0675 | : 0.01 | loss_71.0725      | : 0.01 | fragment_219.0825 | : 0.01 |               |        |
| fragment_207.0775 | : 0.01 | fragment_190.0775 | : 0.01 | loss_109.0875     | : 0.01 |               |        |

StrepSalini\_motif\_199.m2m

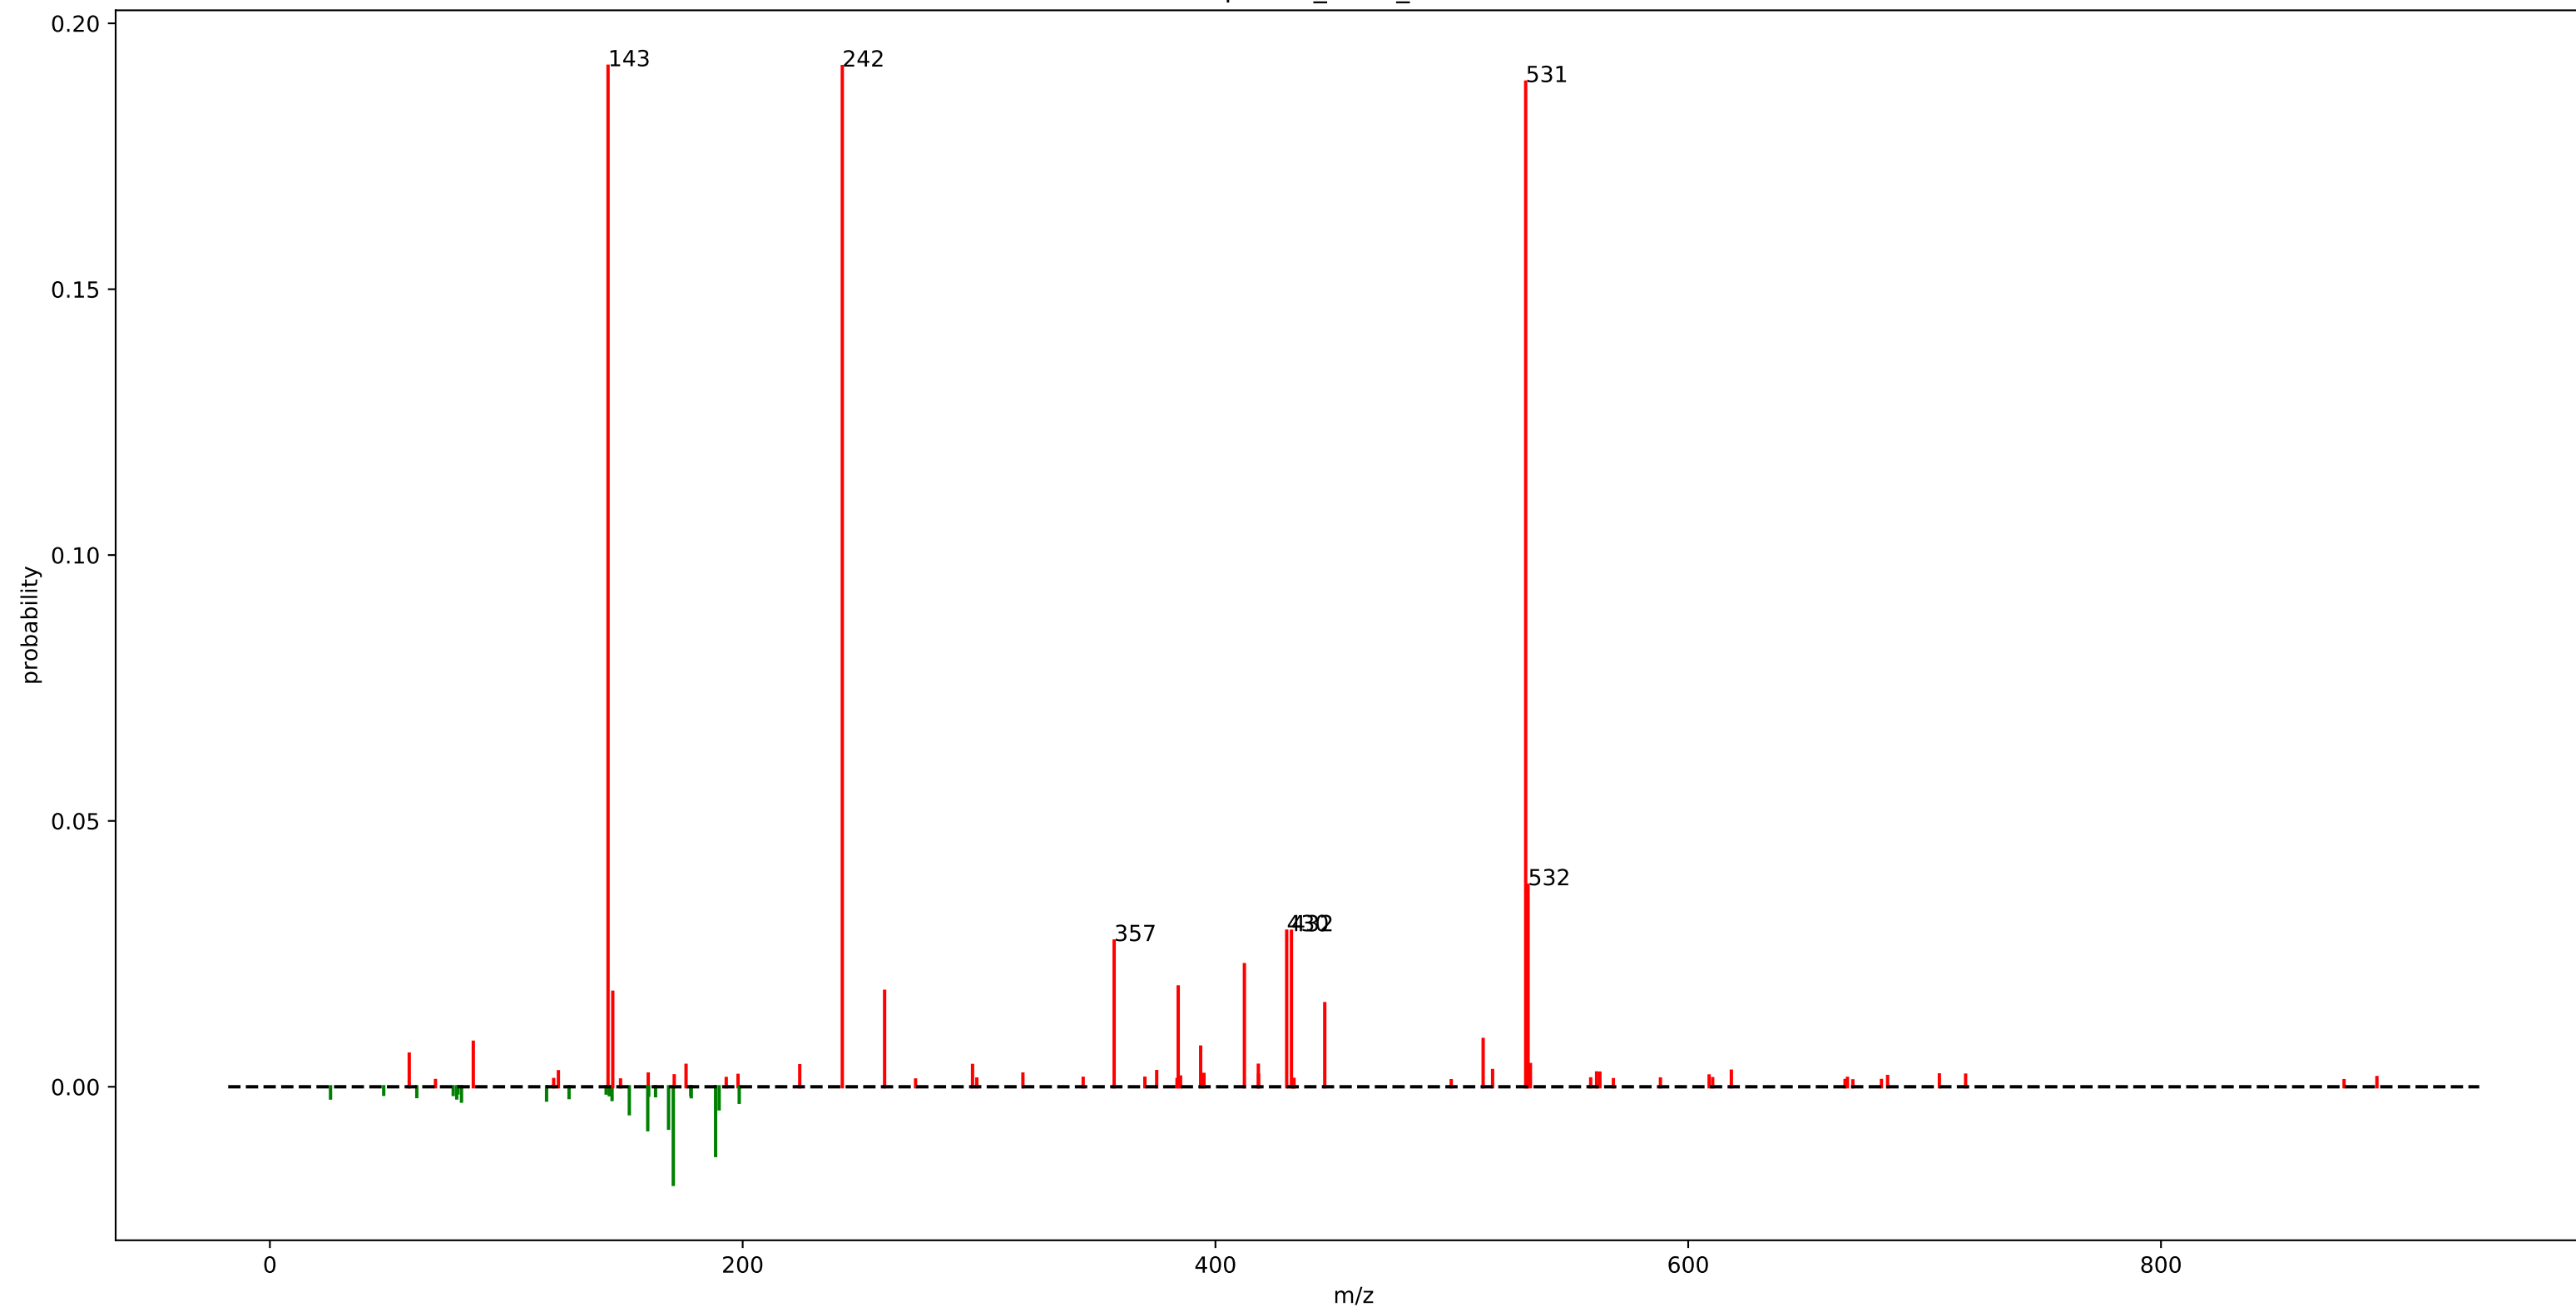

## StrepSalini\_motif\_199.m2m

|                   |        |               |        |
|-------------------|--------|---------------|--------|
| fragment_143.0500 | : 0.19 | loss_152.0500 | : 0.01 |
| fragment_242.1500 | : 0.19 |               |        |
| fragment_531.2500 | : 0.19 |               |        |
| fragment_532.2500 | : 0.04 |               |        |
| fragment_430.1500 | : 0.03 |               |        |
| fragment_432.1525 | : 0.03 |               |        |
| fragment_357.1500 | : 0.03 |               |        |
| fragment_412.2500 | : 0.02 |               |        |
| fragment_384.2525 | : 0.02 |               |        |
| loss_170.6500     | : 0.02 |               |        |
| fragment_260.0500 | : 0.02 |               |        |
| fragment_145.0500 | : 0.02 |               |        |
| fragment_446.2500 | : 0.02 |               |        |
| loss_188.5500     | : 0.01 |               |        |
| fragment_513.2500 | : 0.01 |               |        |
| fragment_86.0500  | : 0.01 |               |        |
| loss_159.8500     | : 0.01 |               |        |
| loss_168.6525     | : 0.01 |               |        |
| fragment_393.7500 | : 0.01 |               |        |
| fragment_58.9500  | : 0.01 |               |        |



mb\_motif\_33.m2m

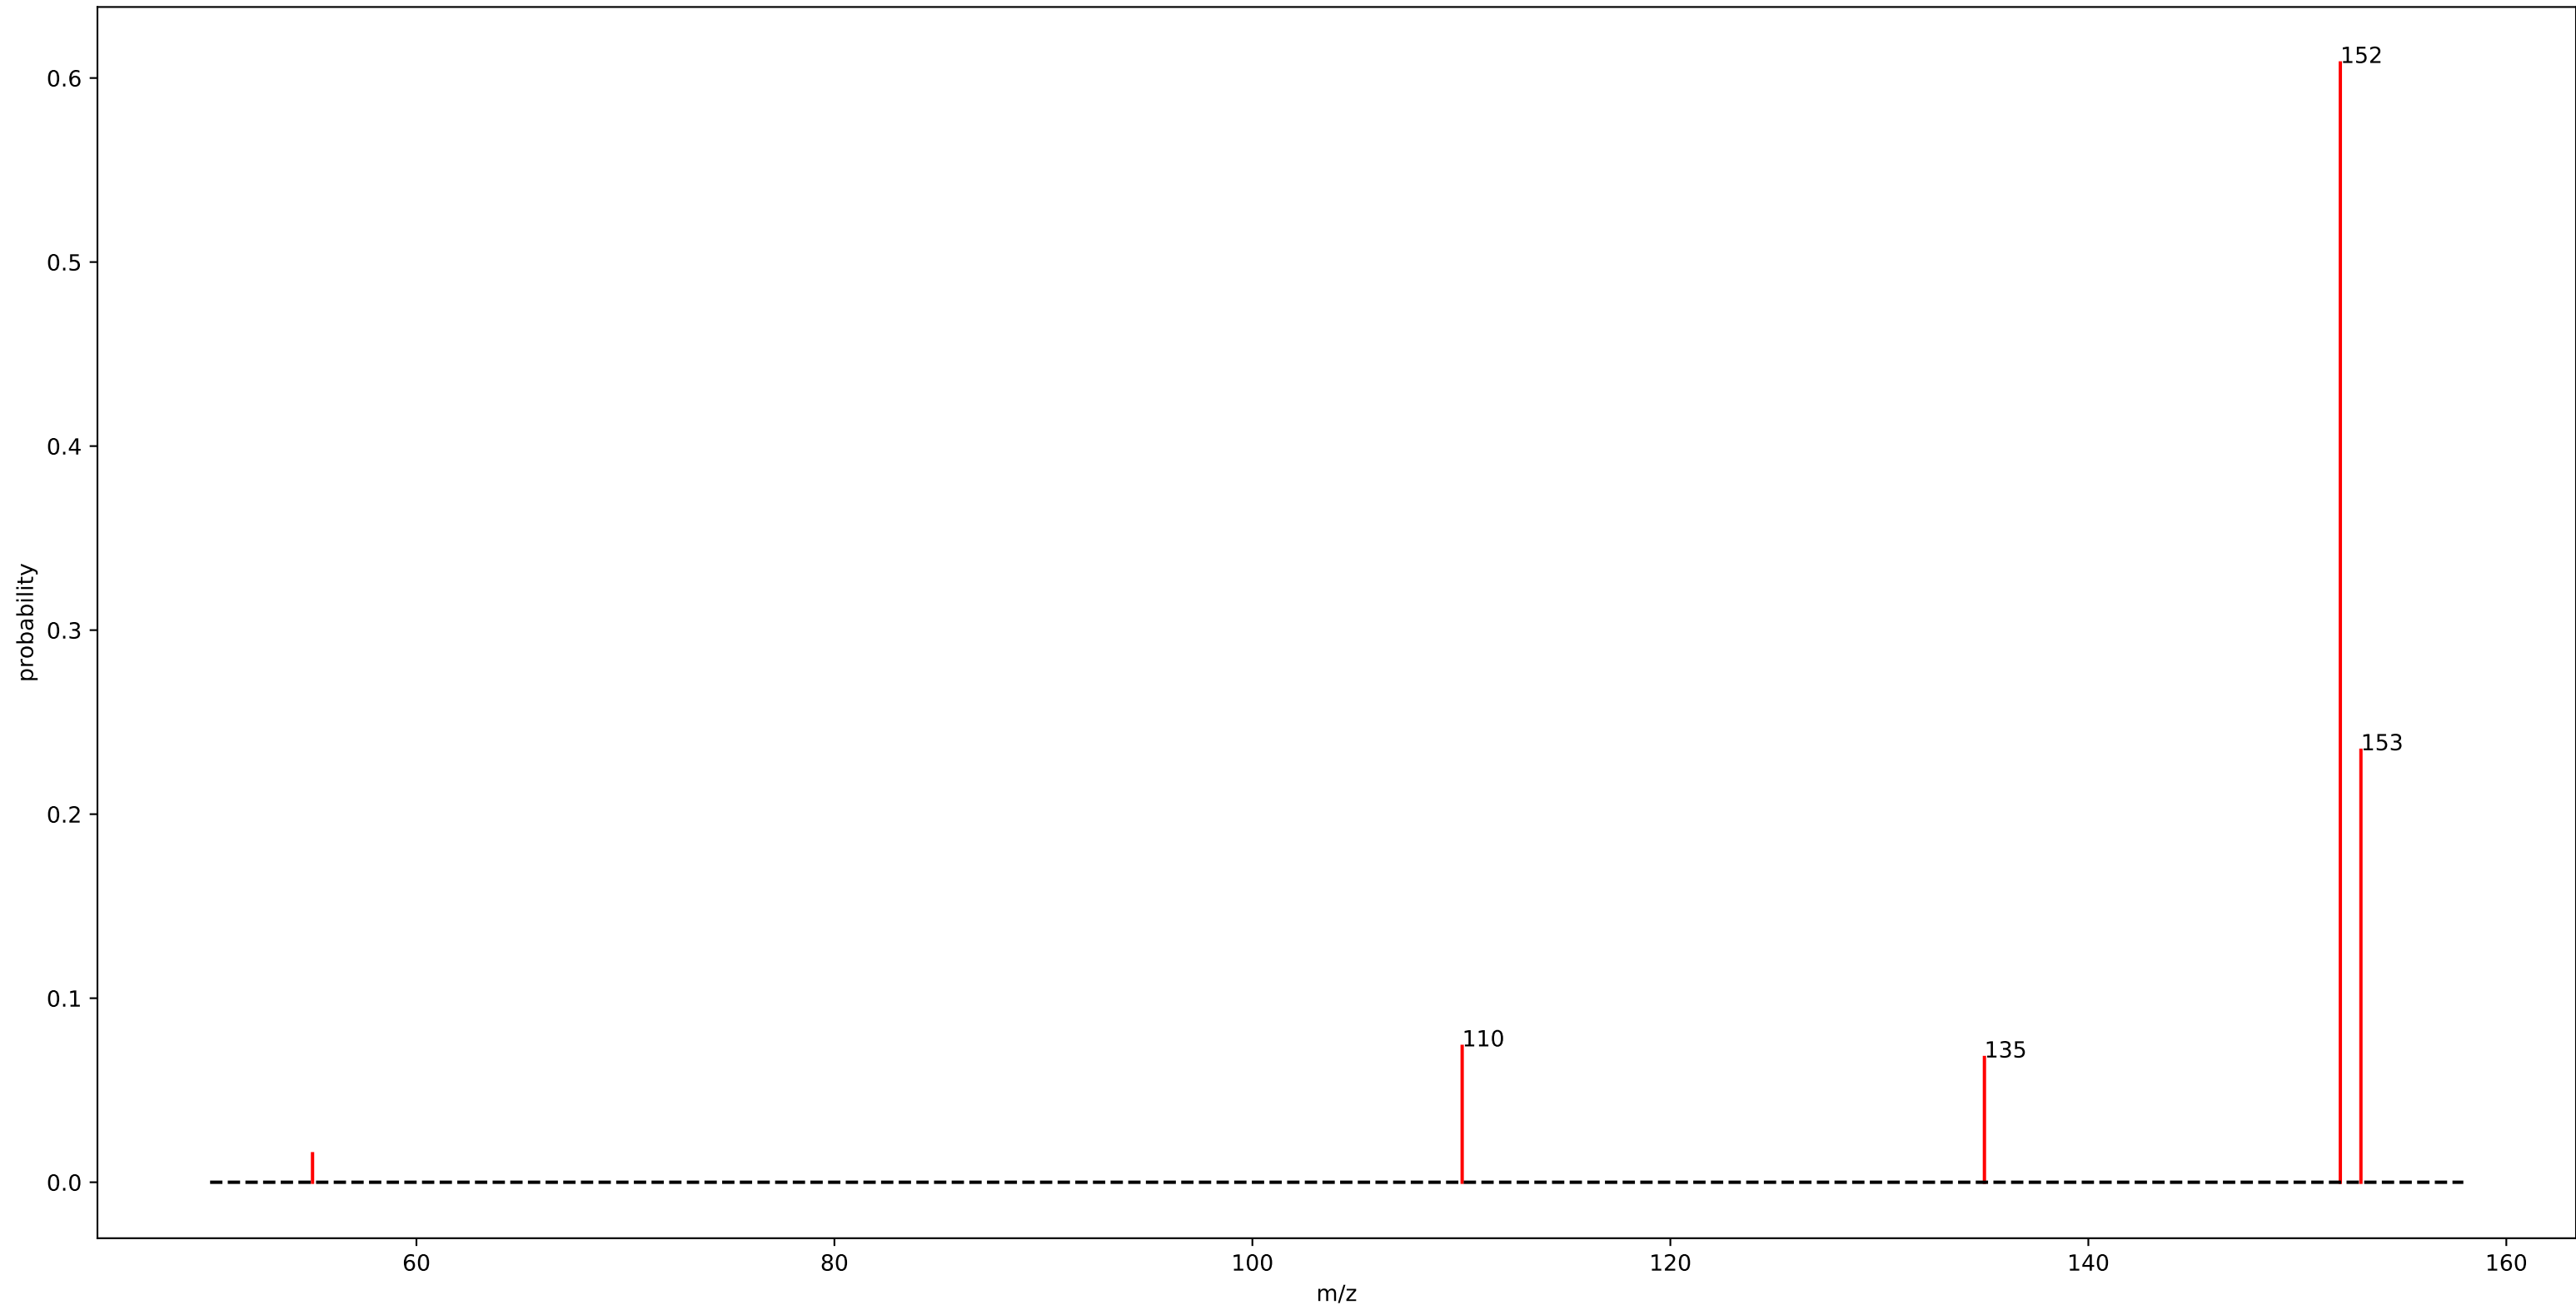

## mb\_motif\_33.m2m

|                   |        |
|-------------------|--------|
| fragment_152.0575 | : 0.61 |
| fragment_153.0425 | : 0.23 |
| fragment_110.0375 | : 0.07 |
| fragment_135.0275 | : 0.07 |
| fragment_55.0275  | : 0.02 |

gnps\_motif\_1.m2m

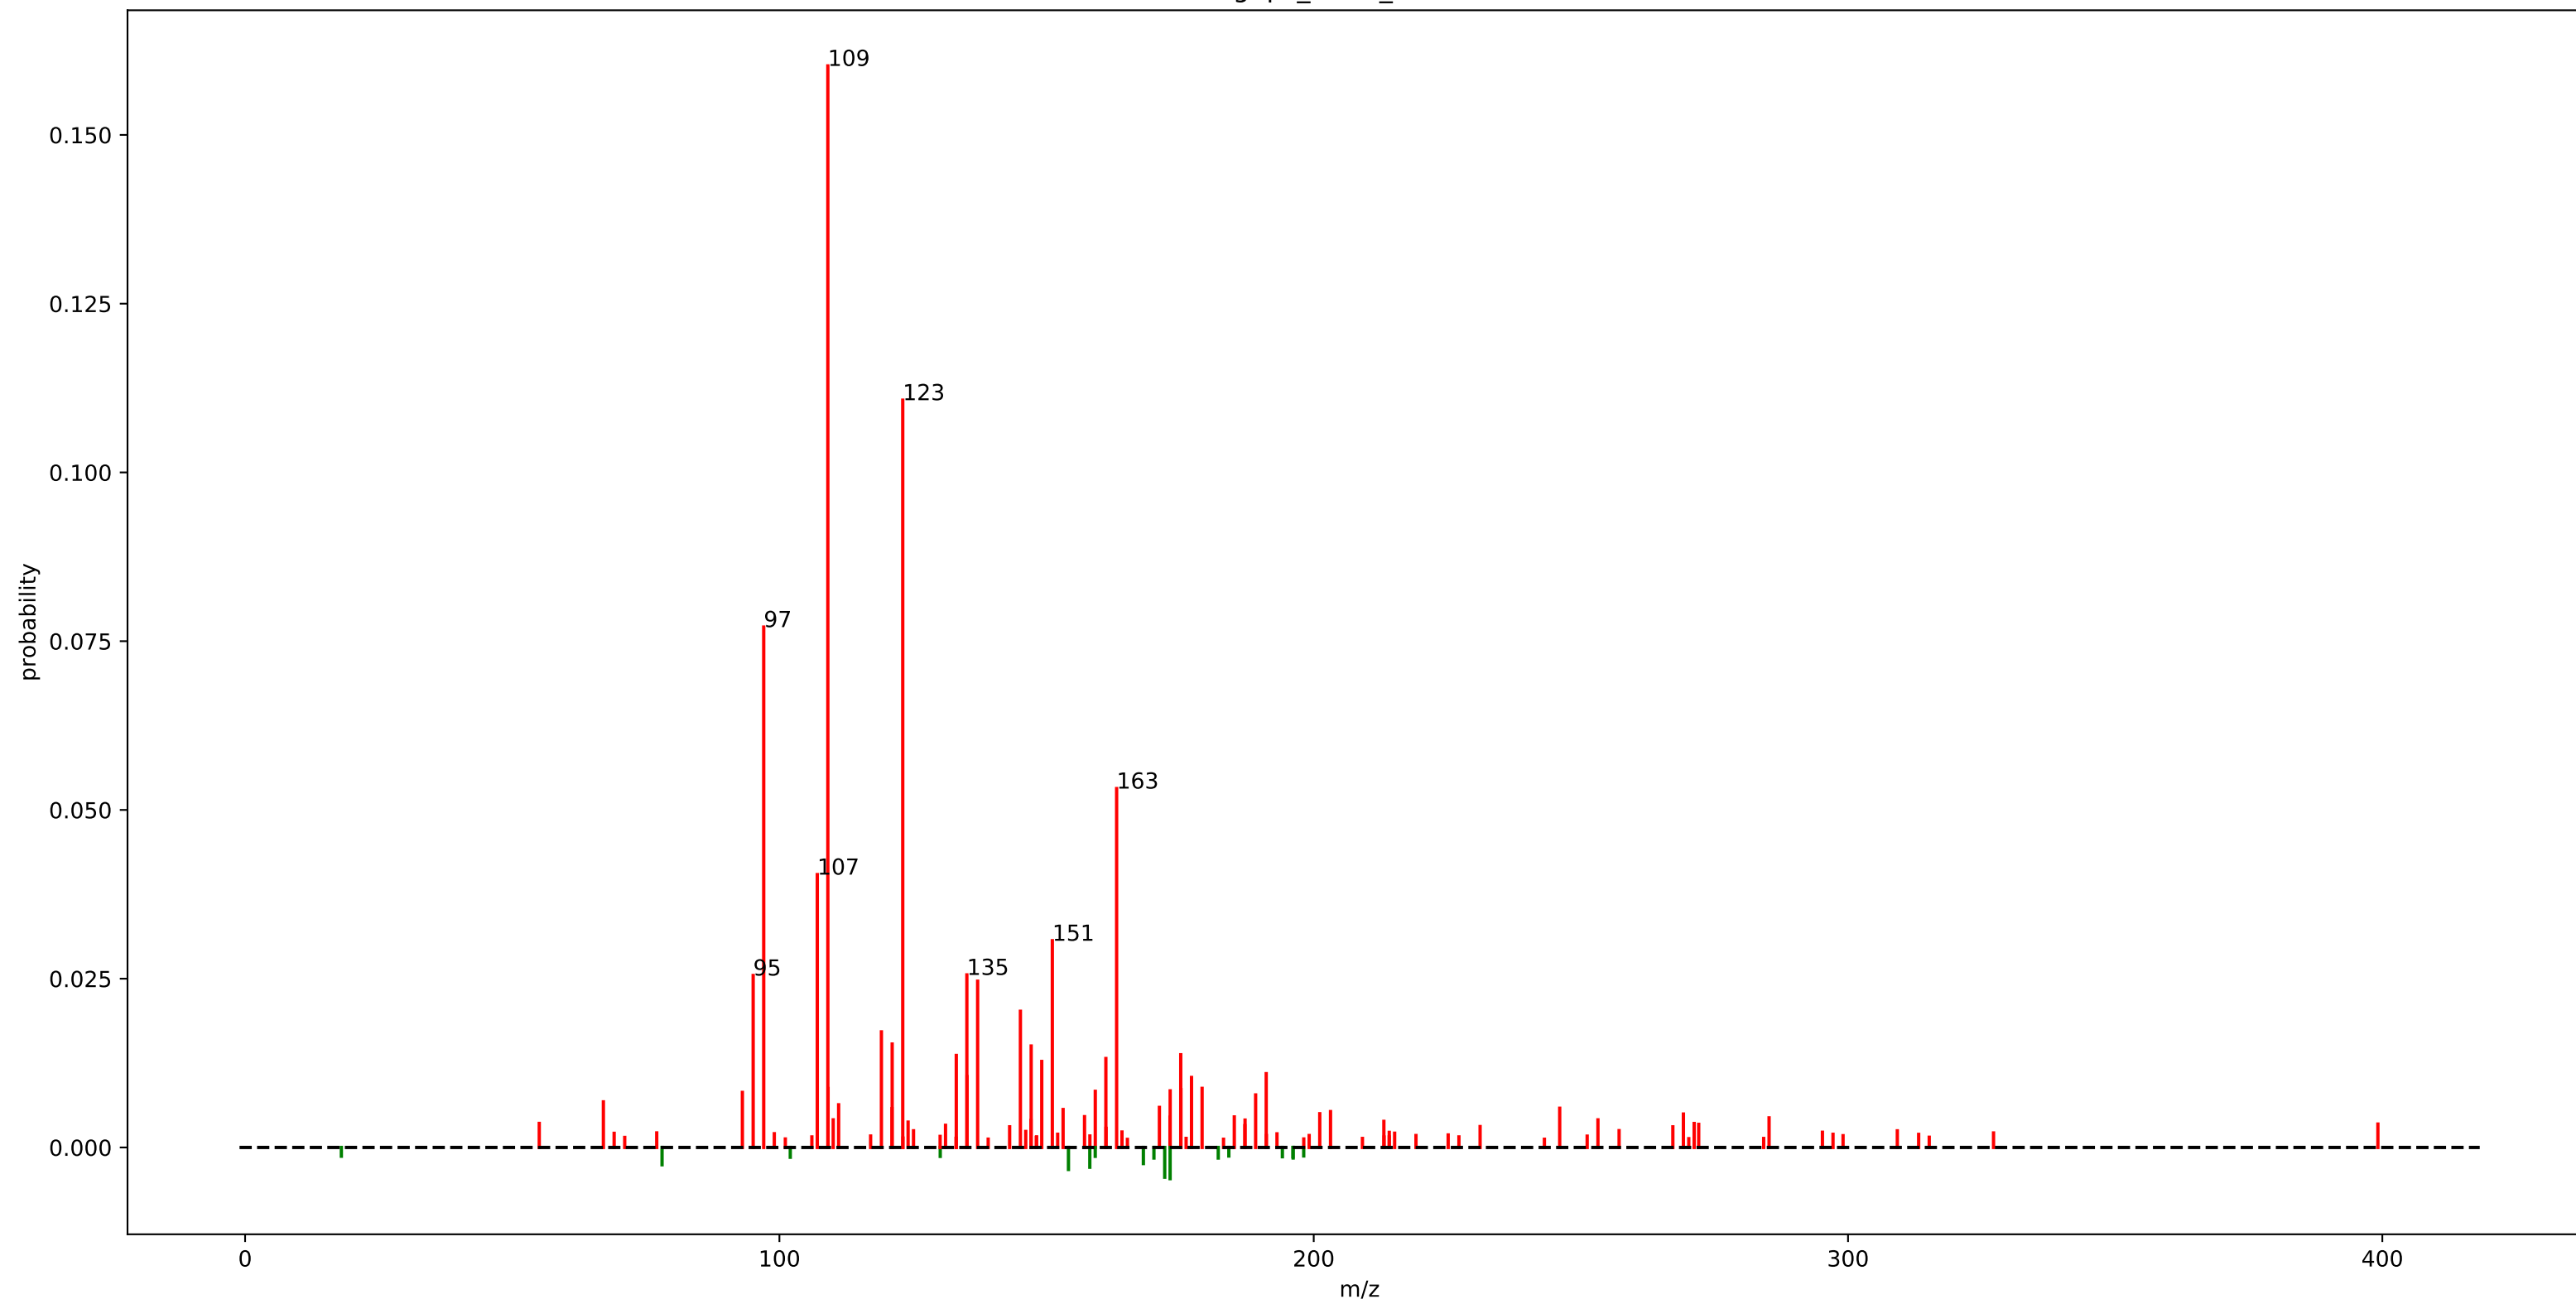

## gnps\_motif\_1.m2m

|                   |        |                   |        |
|-------------------|--------|-------------------|--------|
| fragment_109.0625 | : 0.16 | fragment_179.1075 | : 0.01 |
| fragment_123.0825 | : 0.11 | fragment_109.1025 | : 0.01 |
| fragment_97.0625  | : 0.08 | fragment_175.1475 | : 0.01 |
| fragment_163.1125 | : 0.05 | fragment_173.1325 | : 0.01 |
| fragment_107.0875 | : 0.04 | fragment_159.1175 | : 0.01 |
| fragment_151.0775 | : 0.03 | fragment_93.0675  | : 0.01 |
| fragment_135.0825 | : 0.03 | fragment_189.1275 | : 0.01 |
| fragment_95.0875  | : 0.03 | fragment_67.0525  | : 0.01 |
| fragment_137.0975 | : 0.02 | fragment_111.0825 | : 0.01 |
| fragment_145.1025 | : 0.02 | fragment_171.1175 | : 0.01 |
| fragment_119.0875 | : 0.02 | fragment_246.0375 | : 0.01 |
| fragment_121.1025 | : 0.02 | fragment_121.0625 | : 0.01 |
| fragment_147.1175 | : 0.02 | fragment_153.0925 | : 0.01 |
| fragment_175.1125 | : 0.01 | fragment_203.1425 | : 0.01 |
| fragment_133.1025 | : 0.01 |                   |        |
| fragment_161.0975 | : 0.01 |                   |        |
| fragment_149.0975 | : 0.01 |                   |        |
| fragment_191.1075 | : 0.01 |                   |        |
| fragment_135.1175 | : 0.01 |                   |        |
| fragment_177.1275 | : 0.01 |                   |        |

urine\_mass2motif\_59.m2m

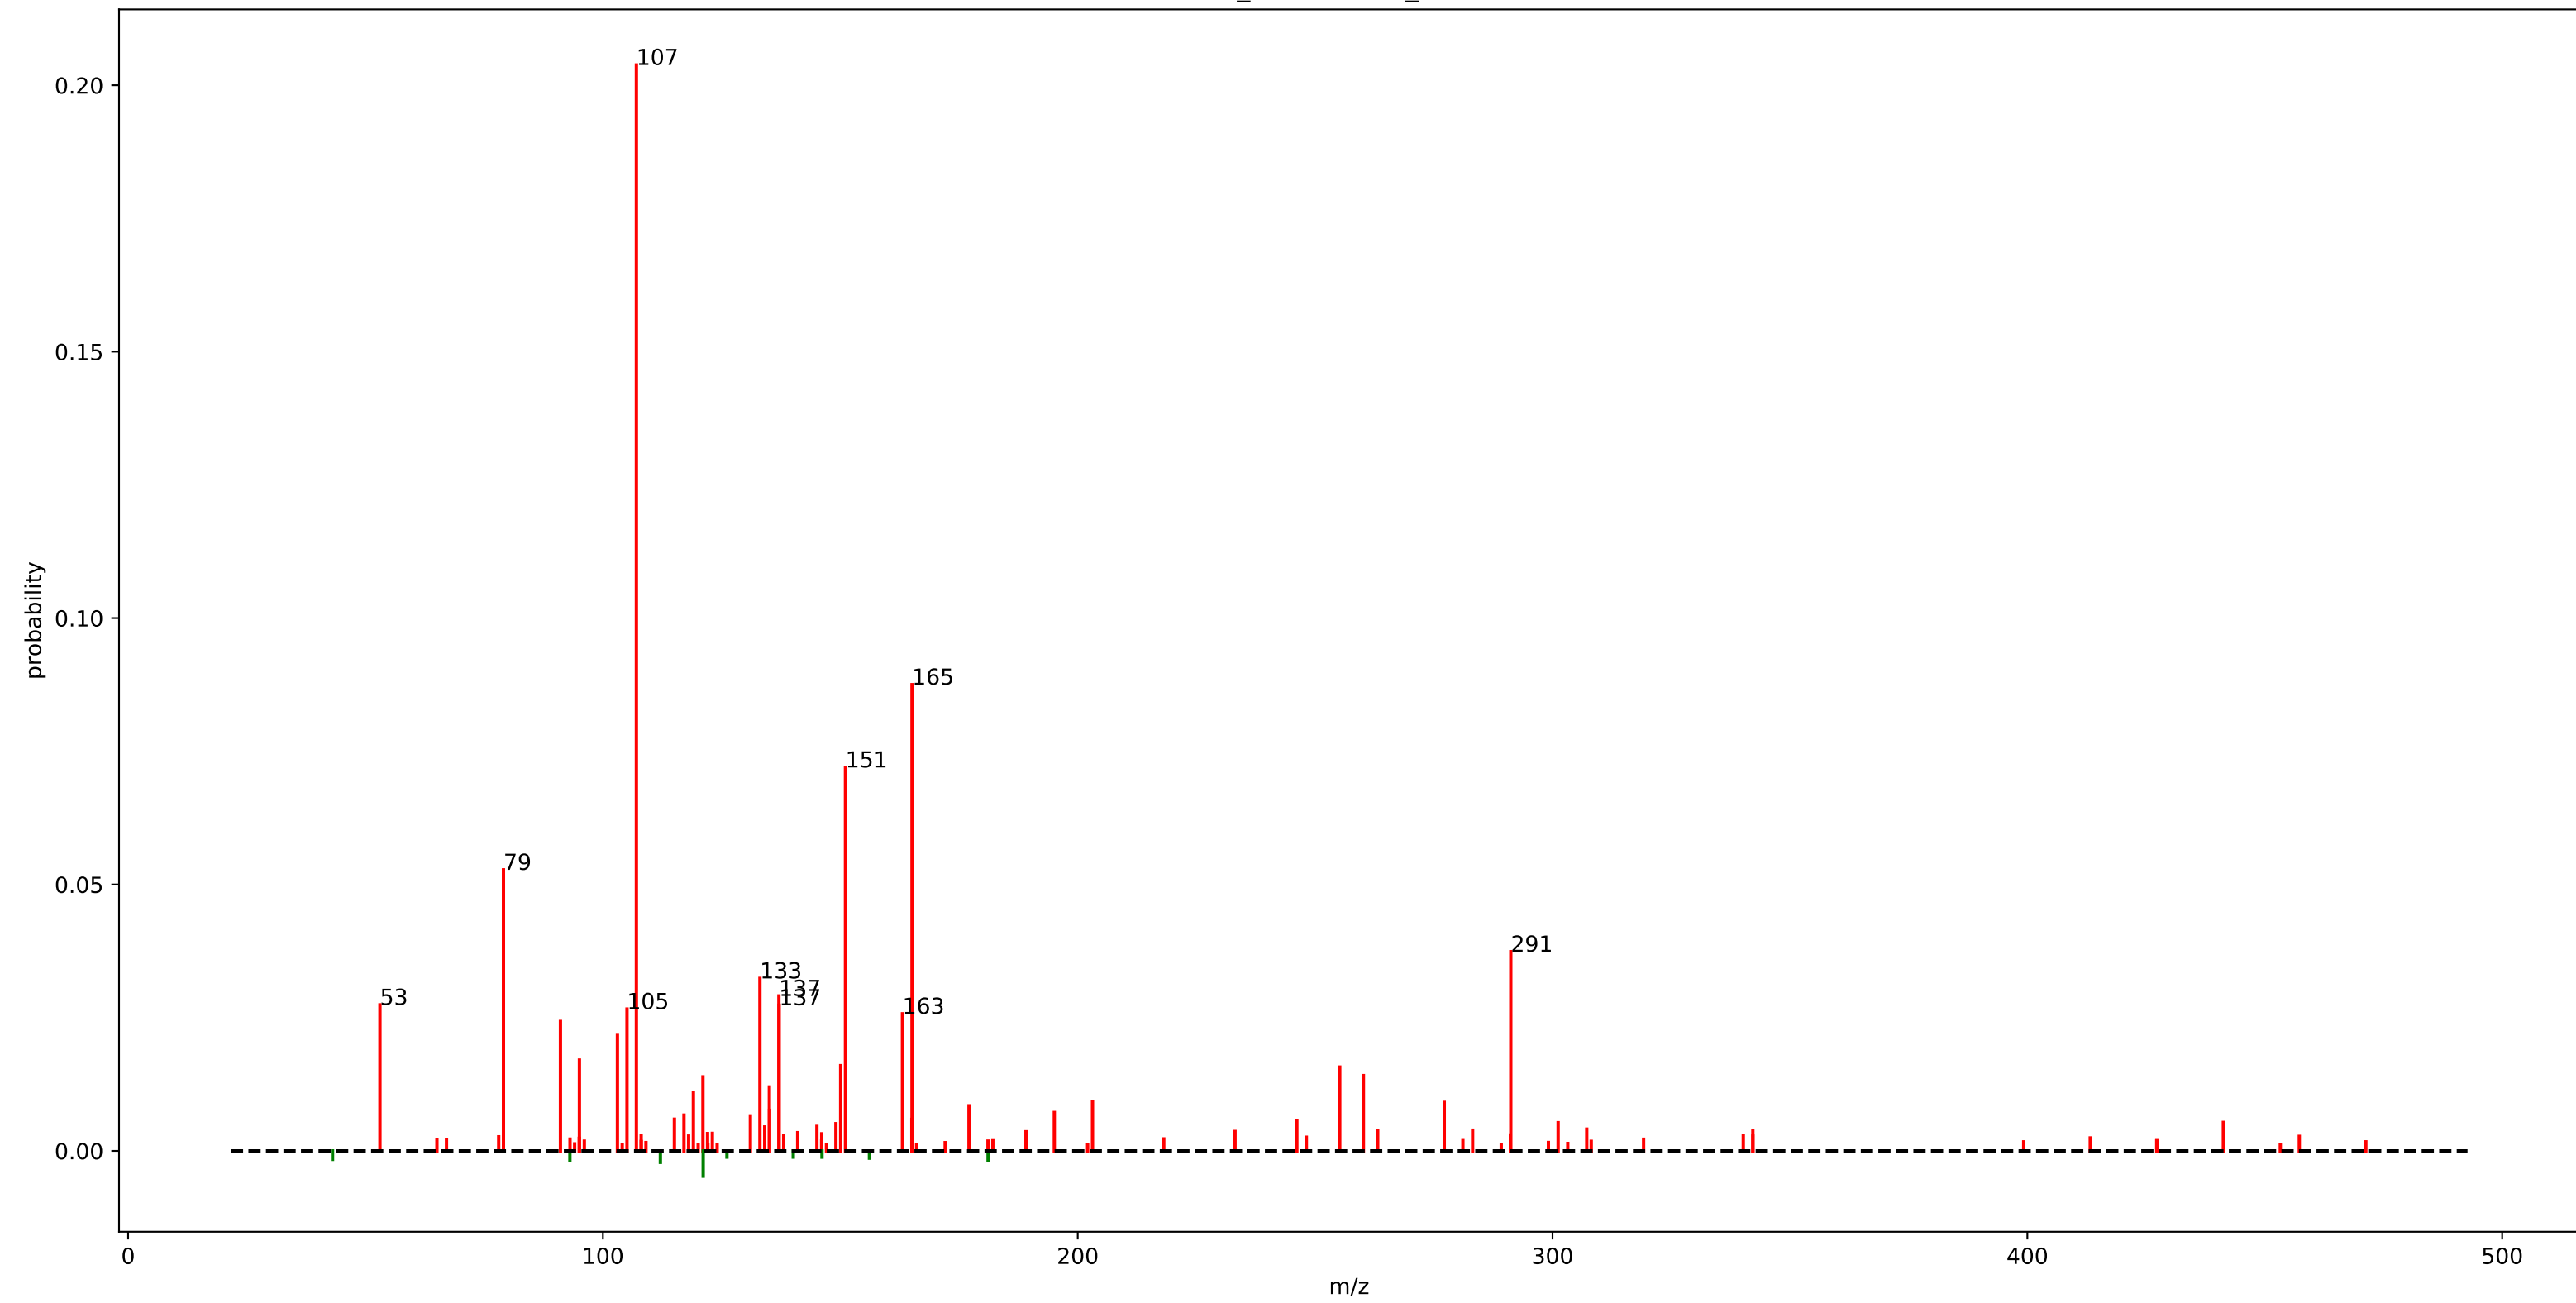

# urine\_mass2motif\_59.m2m

|                   |        |                   |        |
|-------------------|--------|-------------------|--------|
| fragment_107.0475 | : 0.20 | fragment_203.1075 | : 0.01 |
| fragment_165.0925 | : 0.09 | fragment_277.1925 | : 0.01 |
| fragment_151.0775 | : 0.07 | fragment_177.0925 | : 0.01 |
| fragment_79.0525  | : 0.05 | fragment_135.0825 | : 0.01 |
| fragment_291.2075 | : 0.04 | fragment_195.0625 | : 0.01 |
| fragment_133.0625 | : 0.03 | fragment_117.0675 | : 0.01 |
| fragment_137.0575 | : 0.03 | fragment_131.0525 | : 0.01 |
| fragment_53.0375  | : 0.03 | fragment_115.0525 | : 0.01 |
| fragment_137.0975 | : 0.03 | fragment_165.0575 | : 0.01 |
| fragment_105.0675 | : 0.03 | fragment_246.1475 | : 0.01 |
| fragment_163.0775 | : 0.03 | fragment_441.2775 | : 0.01 |
| fragment_91.0525  | : 0.02 | fragment_301.1775 | : 0.01 |
| fragment_103.0525 | : 0.02 | fragment_149.0625 | : 0.01 |
| fragment_95.0475  | : 0.02 |                   |        |
| fragment_150.0675 | : 0.02 |                   |        |
| fragment_255.1825 | : 0.02 |                   |        |
| fragment_260.1675 | : 0.01 |                   |        |
| fragment_121.0625 | : 0.01 |                   |        |
| fragment_135.0475 | : 0.01 |                   |        |
| fragment_119.0475 | : 0.01 |                   |        |

motif\_596

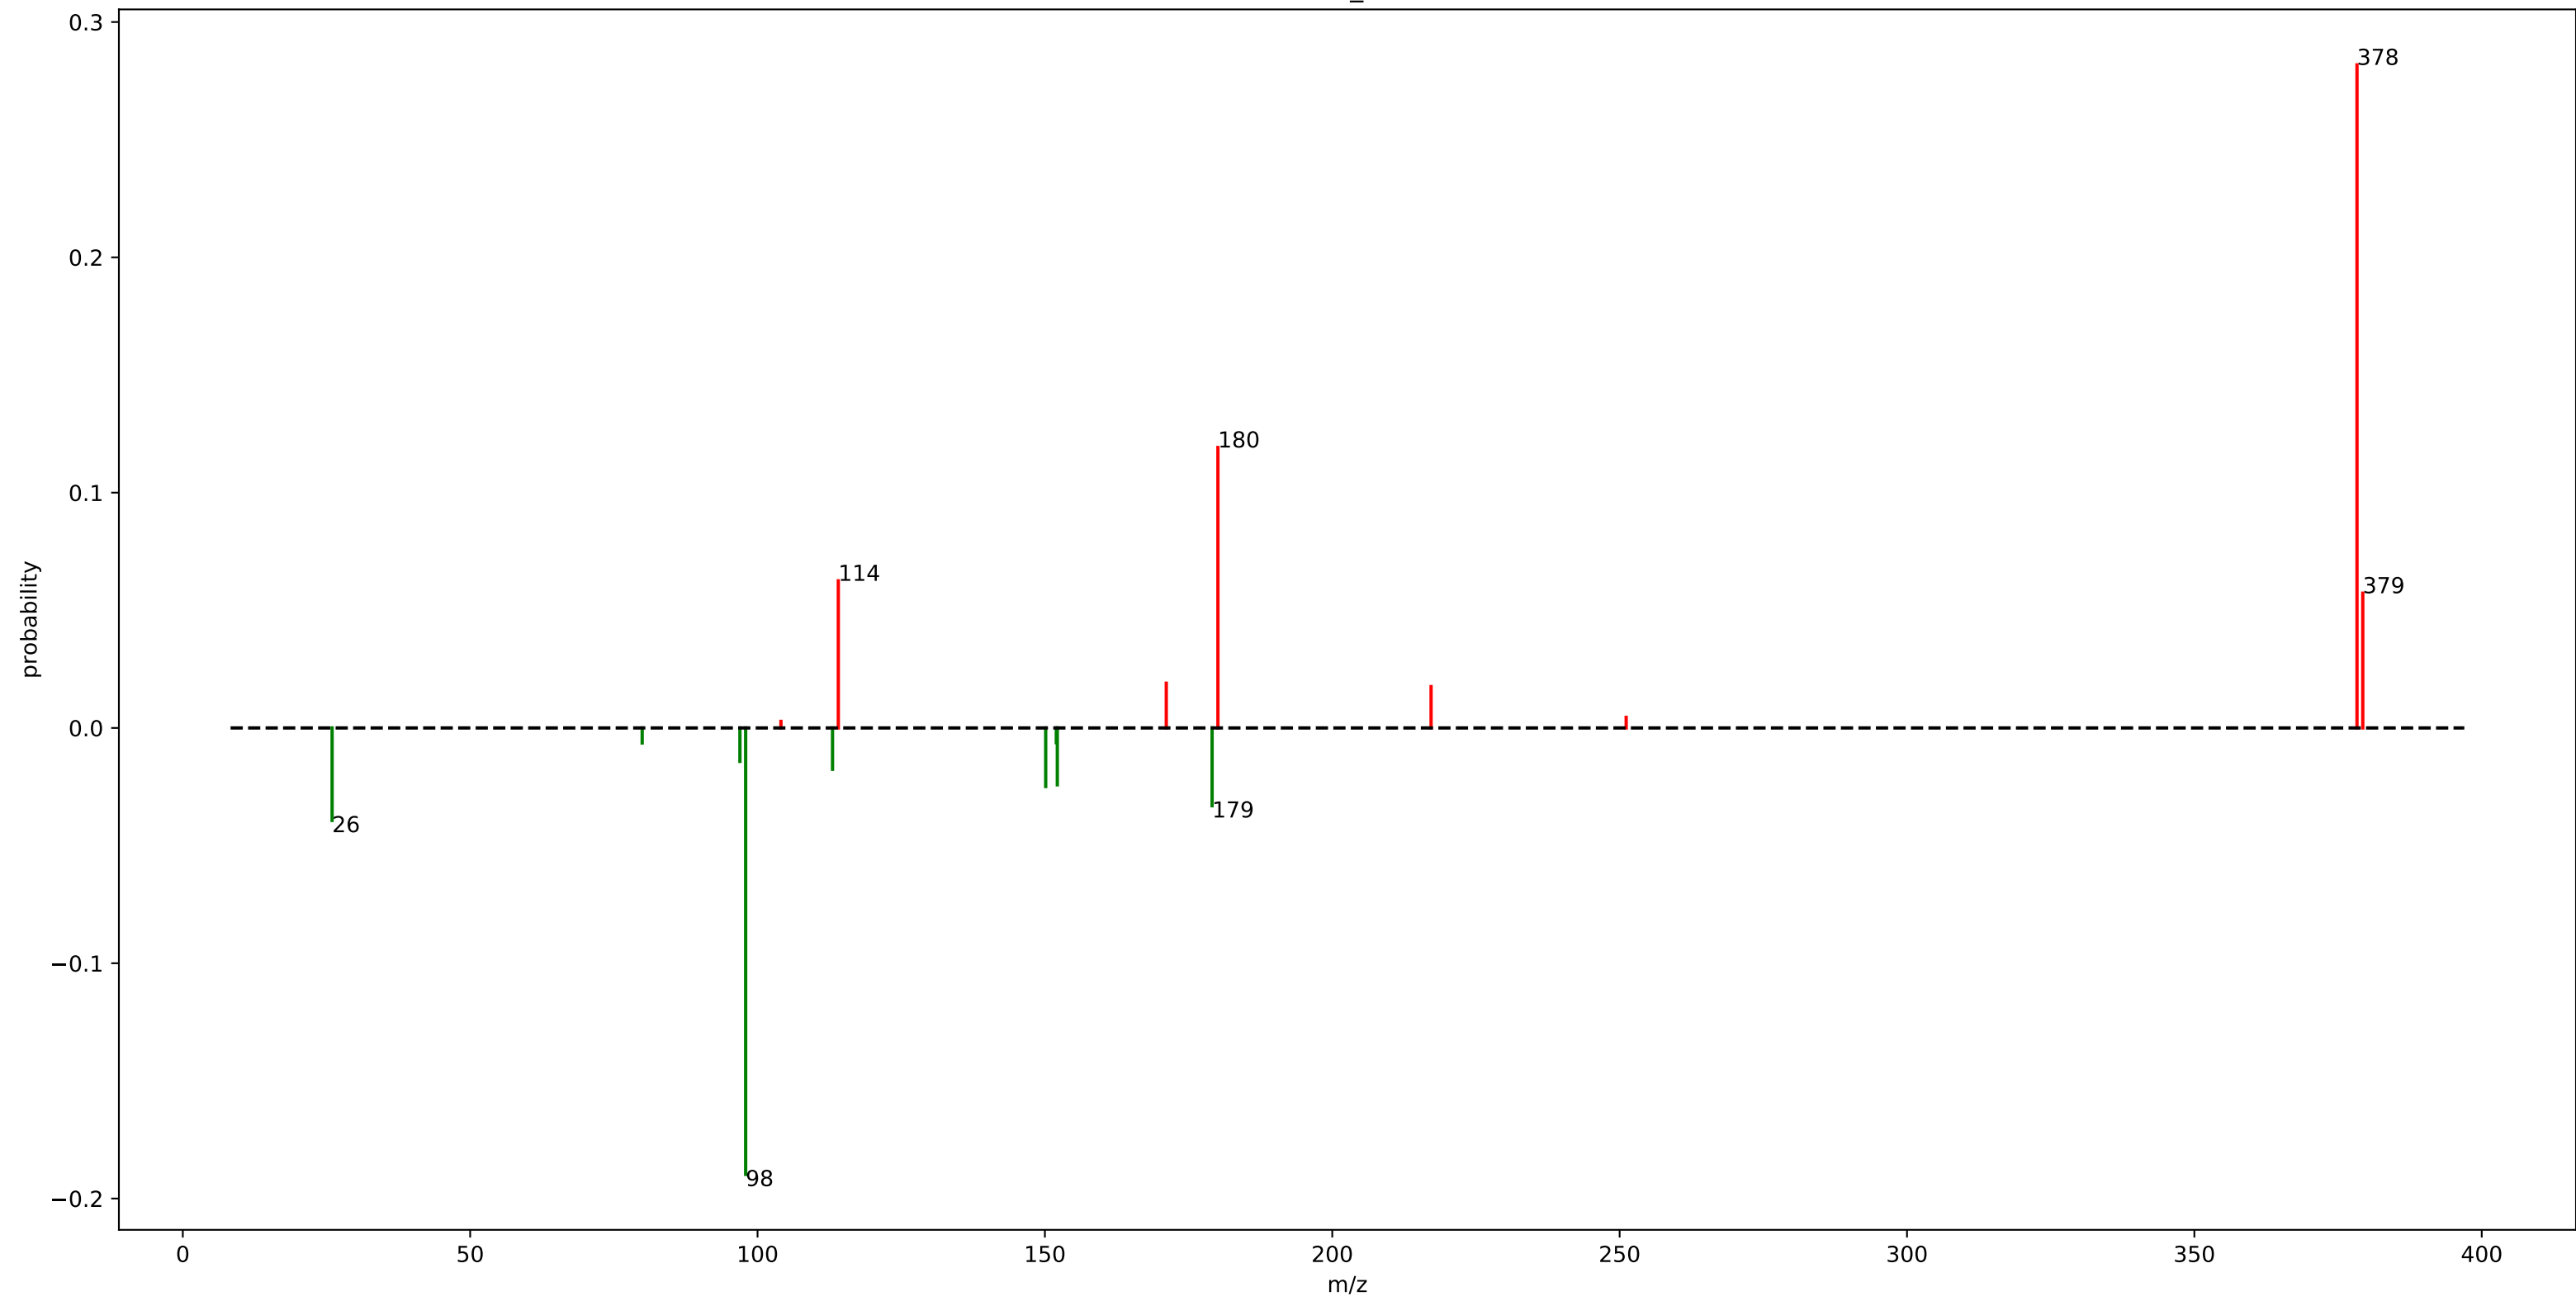

## motif\_596

|                   |        |
|-------------------|--------|
| fragment_378.2975 | : 0.28 |
| loss_97.9325      | : 0.19 |
| fragment_180.1025 | : 0.12 |
| fragment_114.0525 | : 0.06 |
| fragment_379.3025 | : 0.06 |
| loss_25.9775      | : 0.04 |
| loss_179.0925     | : 0.03 |
| loss_150.1375     | : 0.02 |
| loss_152.1575     | : 0.02 |
| fragment_171.1175 | : 0.02 |
| loss_113.0475     | : 0.02 |
| fragment_217.1925 | : 0.02 |
| loss_96.9325      | : 0.01 |
| loss_79.9275      | : 0.01 |
| loss_151.9825     | : 0.01 |



urine\_mass2motif\_130.m2m

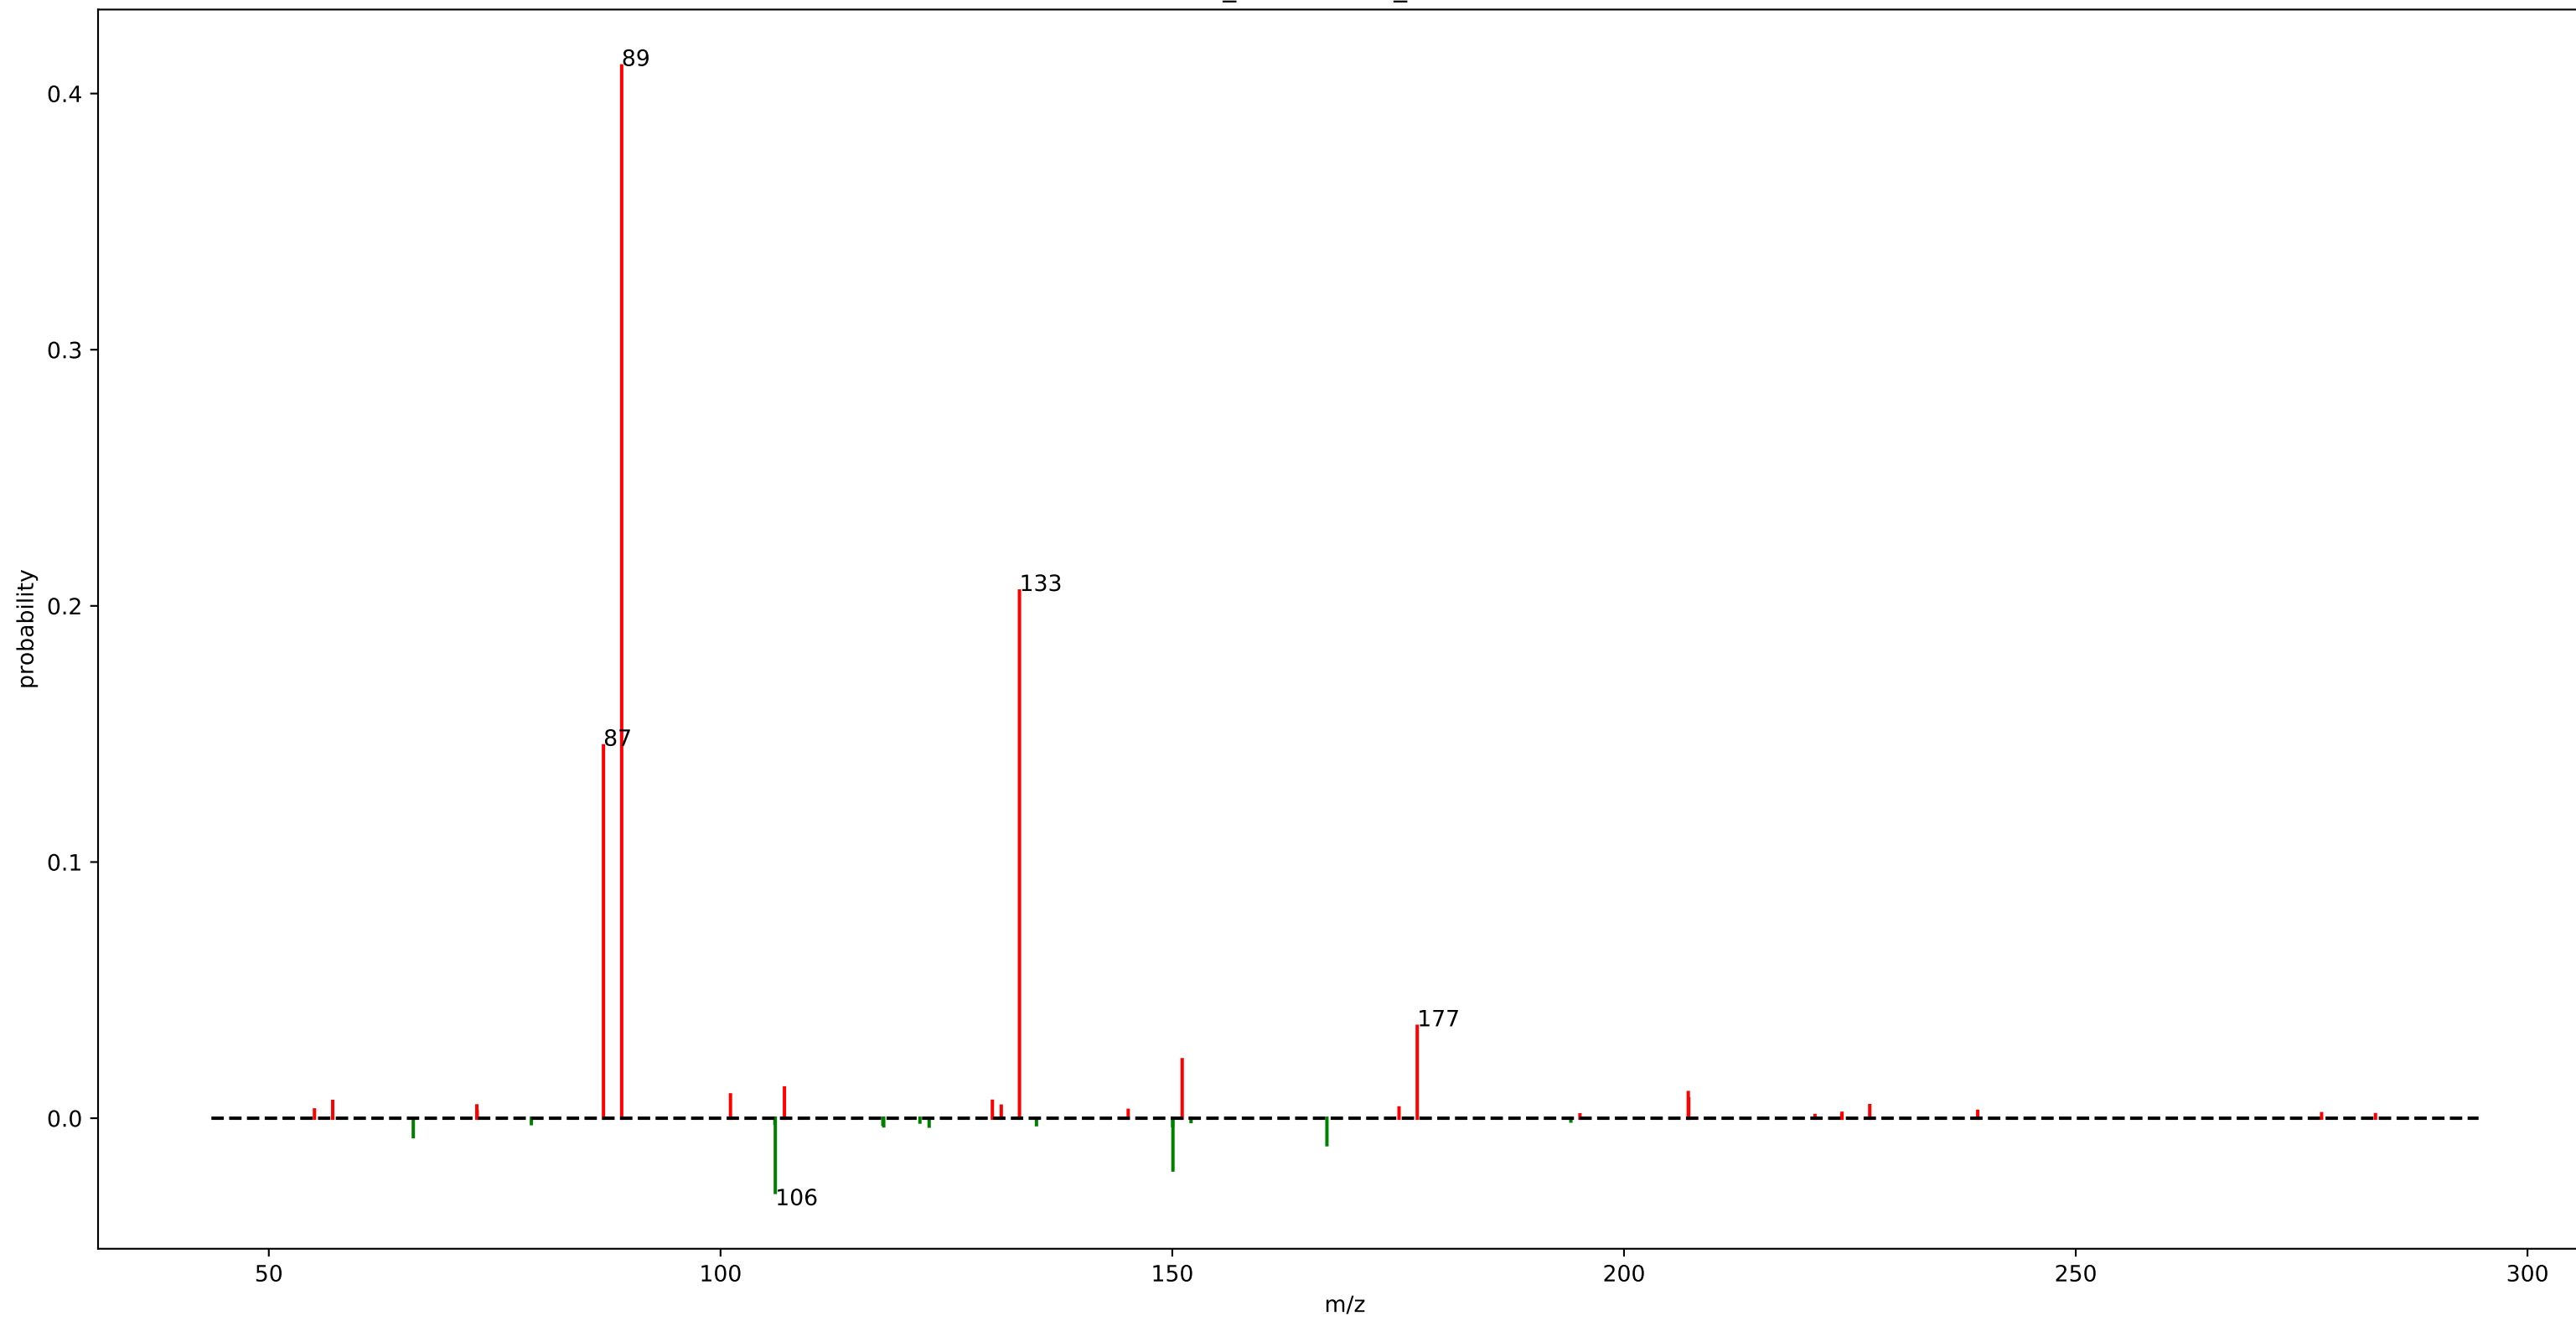

## urine\_mass2motif\_130.m2m

|                   |        |
|-------------------|--------|
| fragment_89.0575  | : 0.41 |
| fragment_133.0875 | : 0.21 |
| fragment_87.0425  | : 0.15 |
| fragment_177.1125 | : 0.04 |
| loss_106.0625     | : 0.03 |
| fragment_151.0975 | : 0.02 |
| loss_150.0725     | : 0.02 |
| fragment_107.0725 | : 0.01 |
| loss_167.1175     | : 0.01 |
| fragment_207.1125 | : 0.01 |
| fragment_101.0975 | : 0.01 |
| fragment_207.1575 | : 0.01 |
| loss_65.9925      | : 0.01 |
| fragment_130.0875 | : 0.01 |
| fragment_57.0725  | : 0.01 |

motif\_594

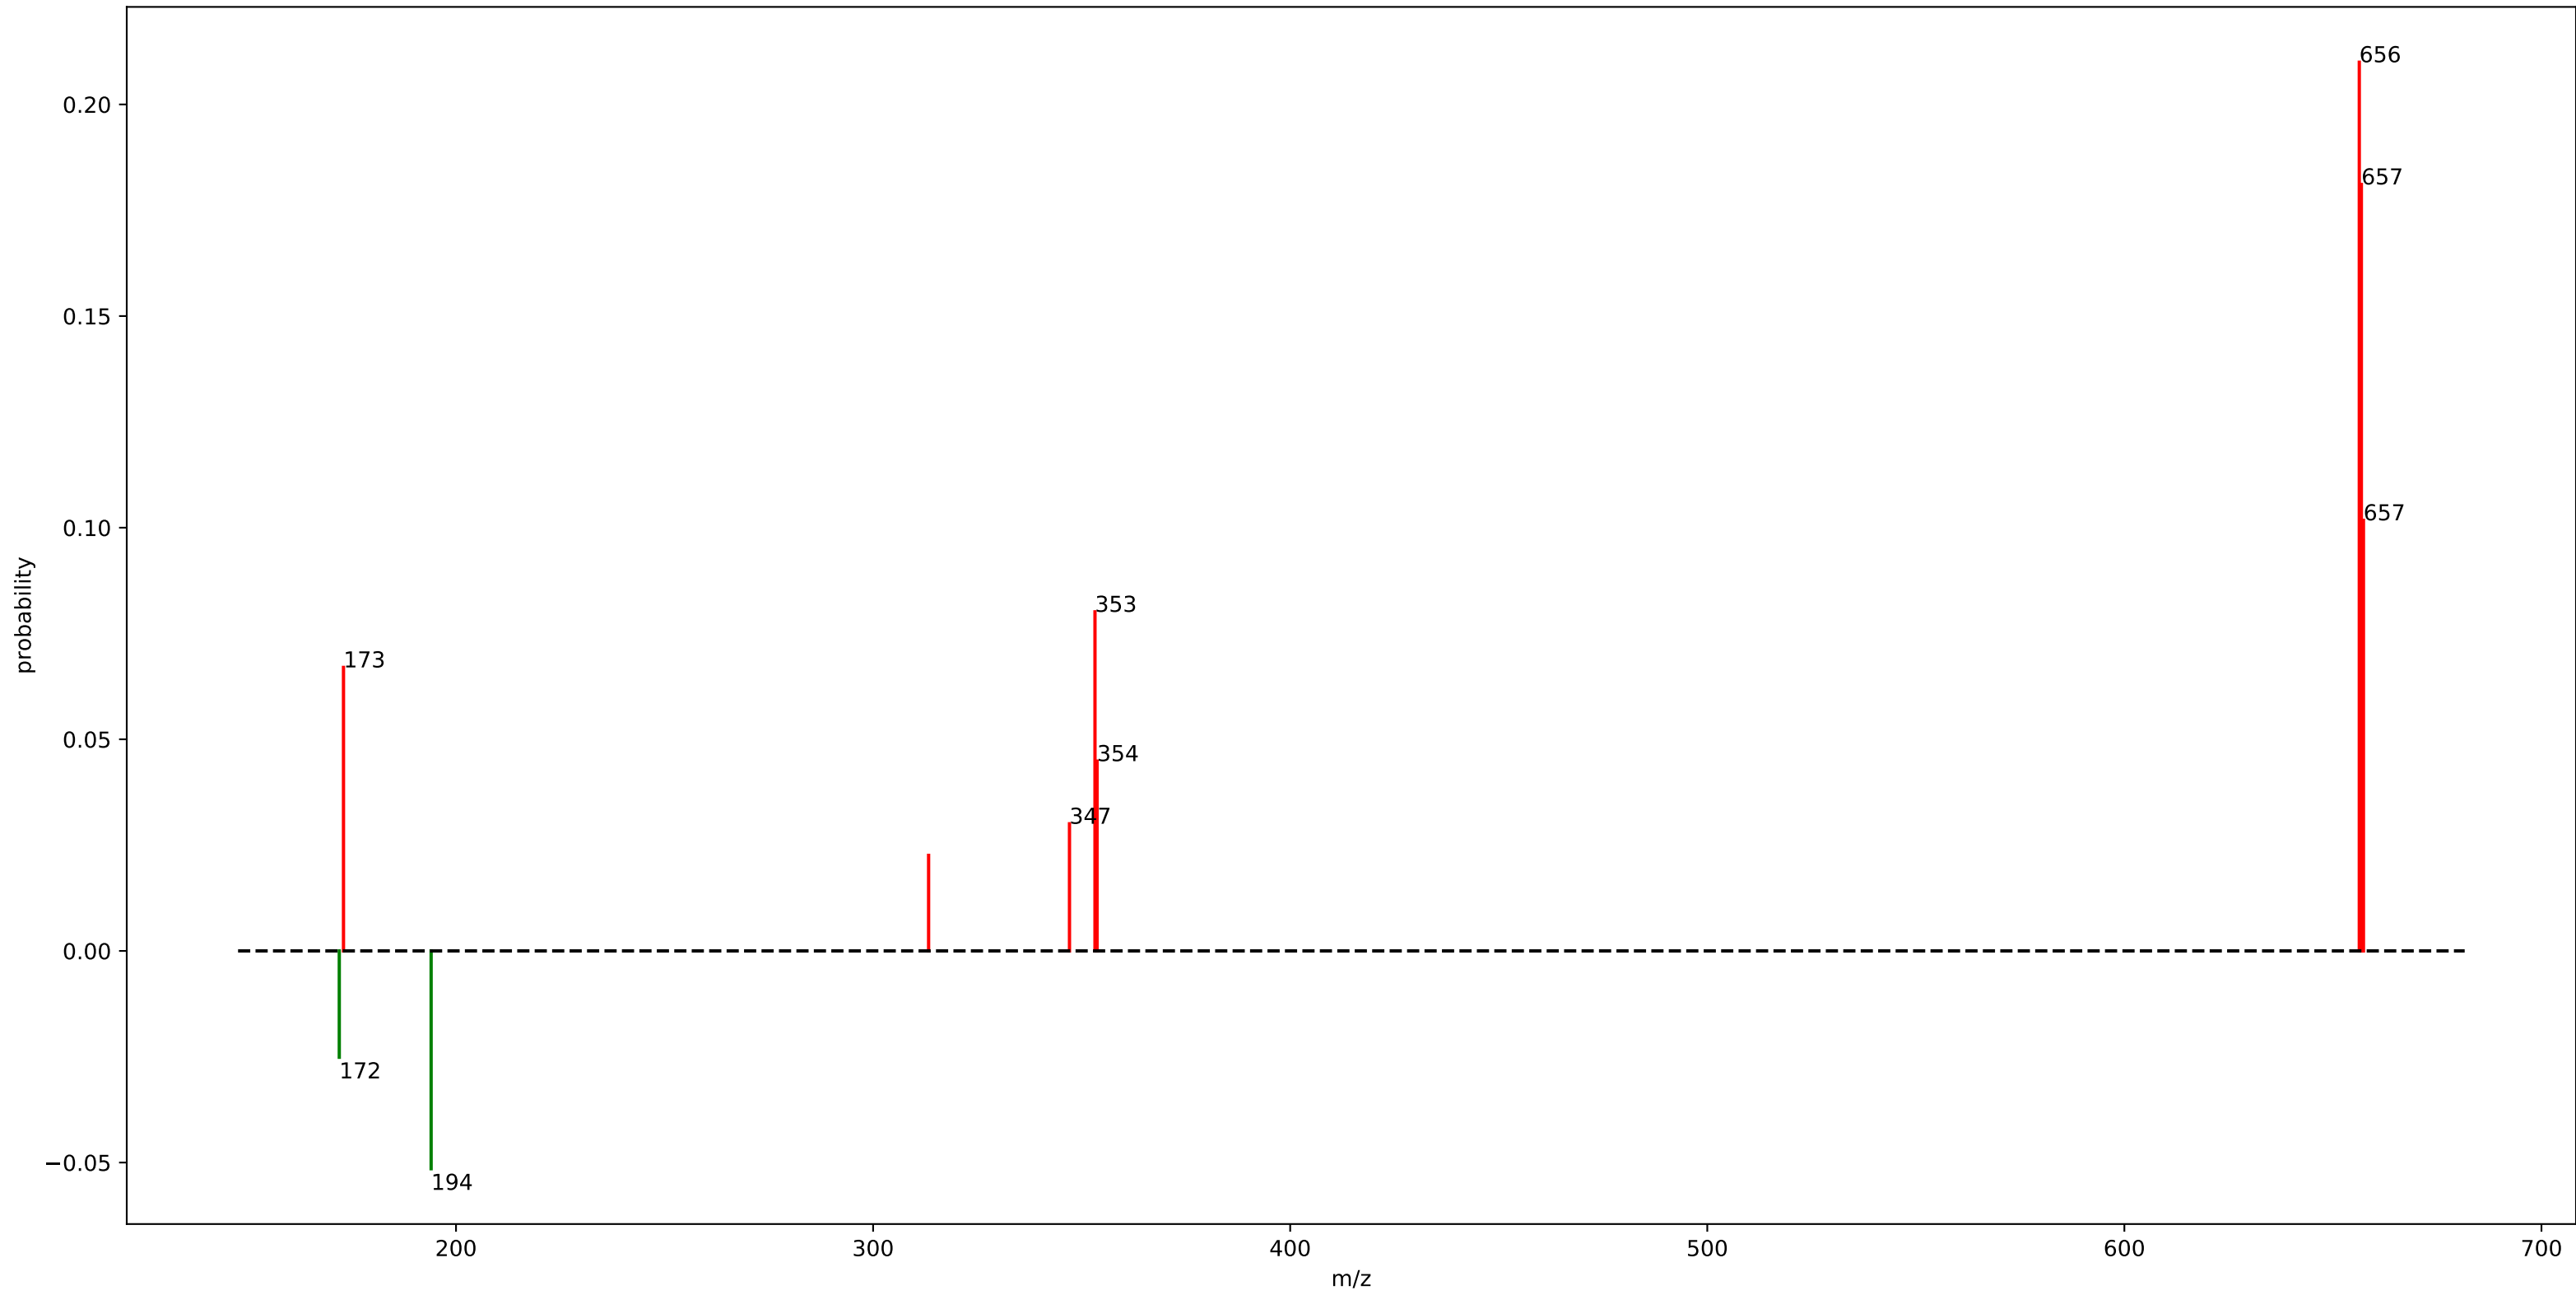

## motif\_594

|                   |        |
|-------------------|--------|
| fragment_656.3225 | : 0.21 |
| fragment_656.8225 | : 0.18 |
| fragment_657.3225 | : 0.10 |
| fragment_353.1975 | : 0.08 |
| fragment_173.0225 | : 0.07 |
| loss_194.0325     | : 0.05 |
| fragment_353.6975 | : 0.04 |
| fragment_347.0825 | : 0.03 |
| loss_172.0125     | : 0.03 |
| fragment_313.3075 | : 0.02 |

urine\_mass2motif\_194.m2m

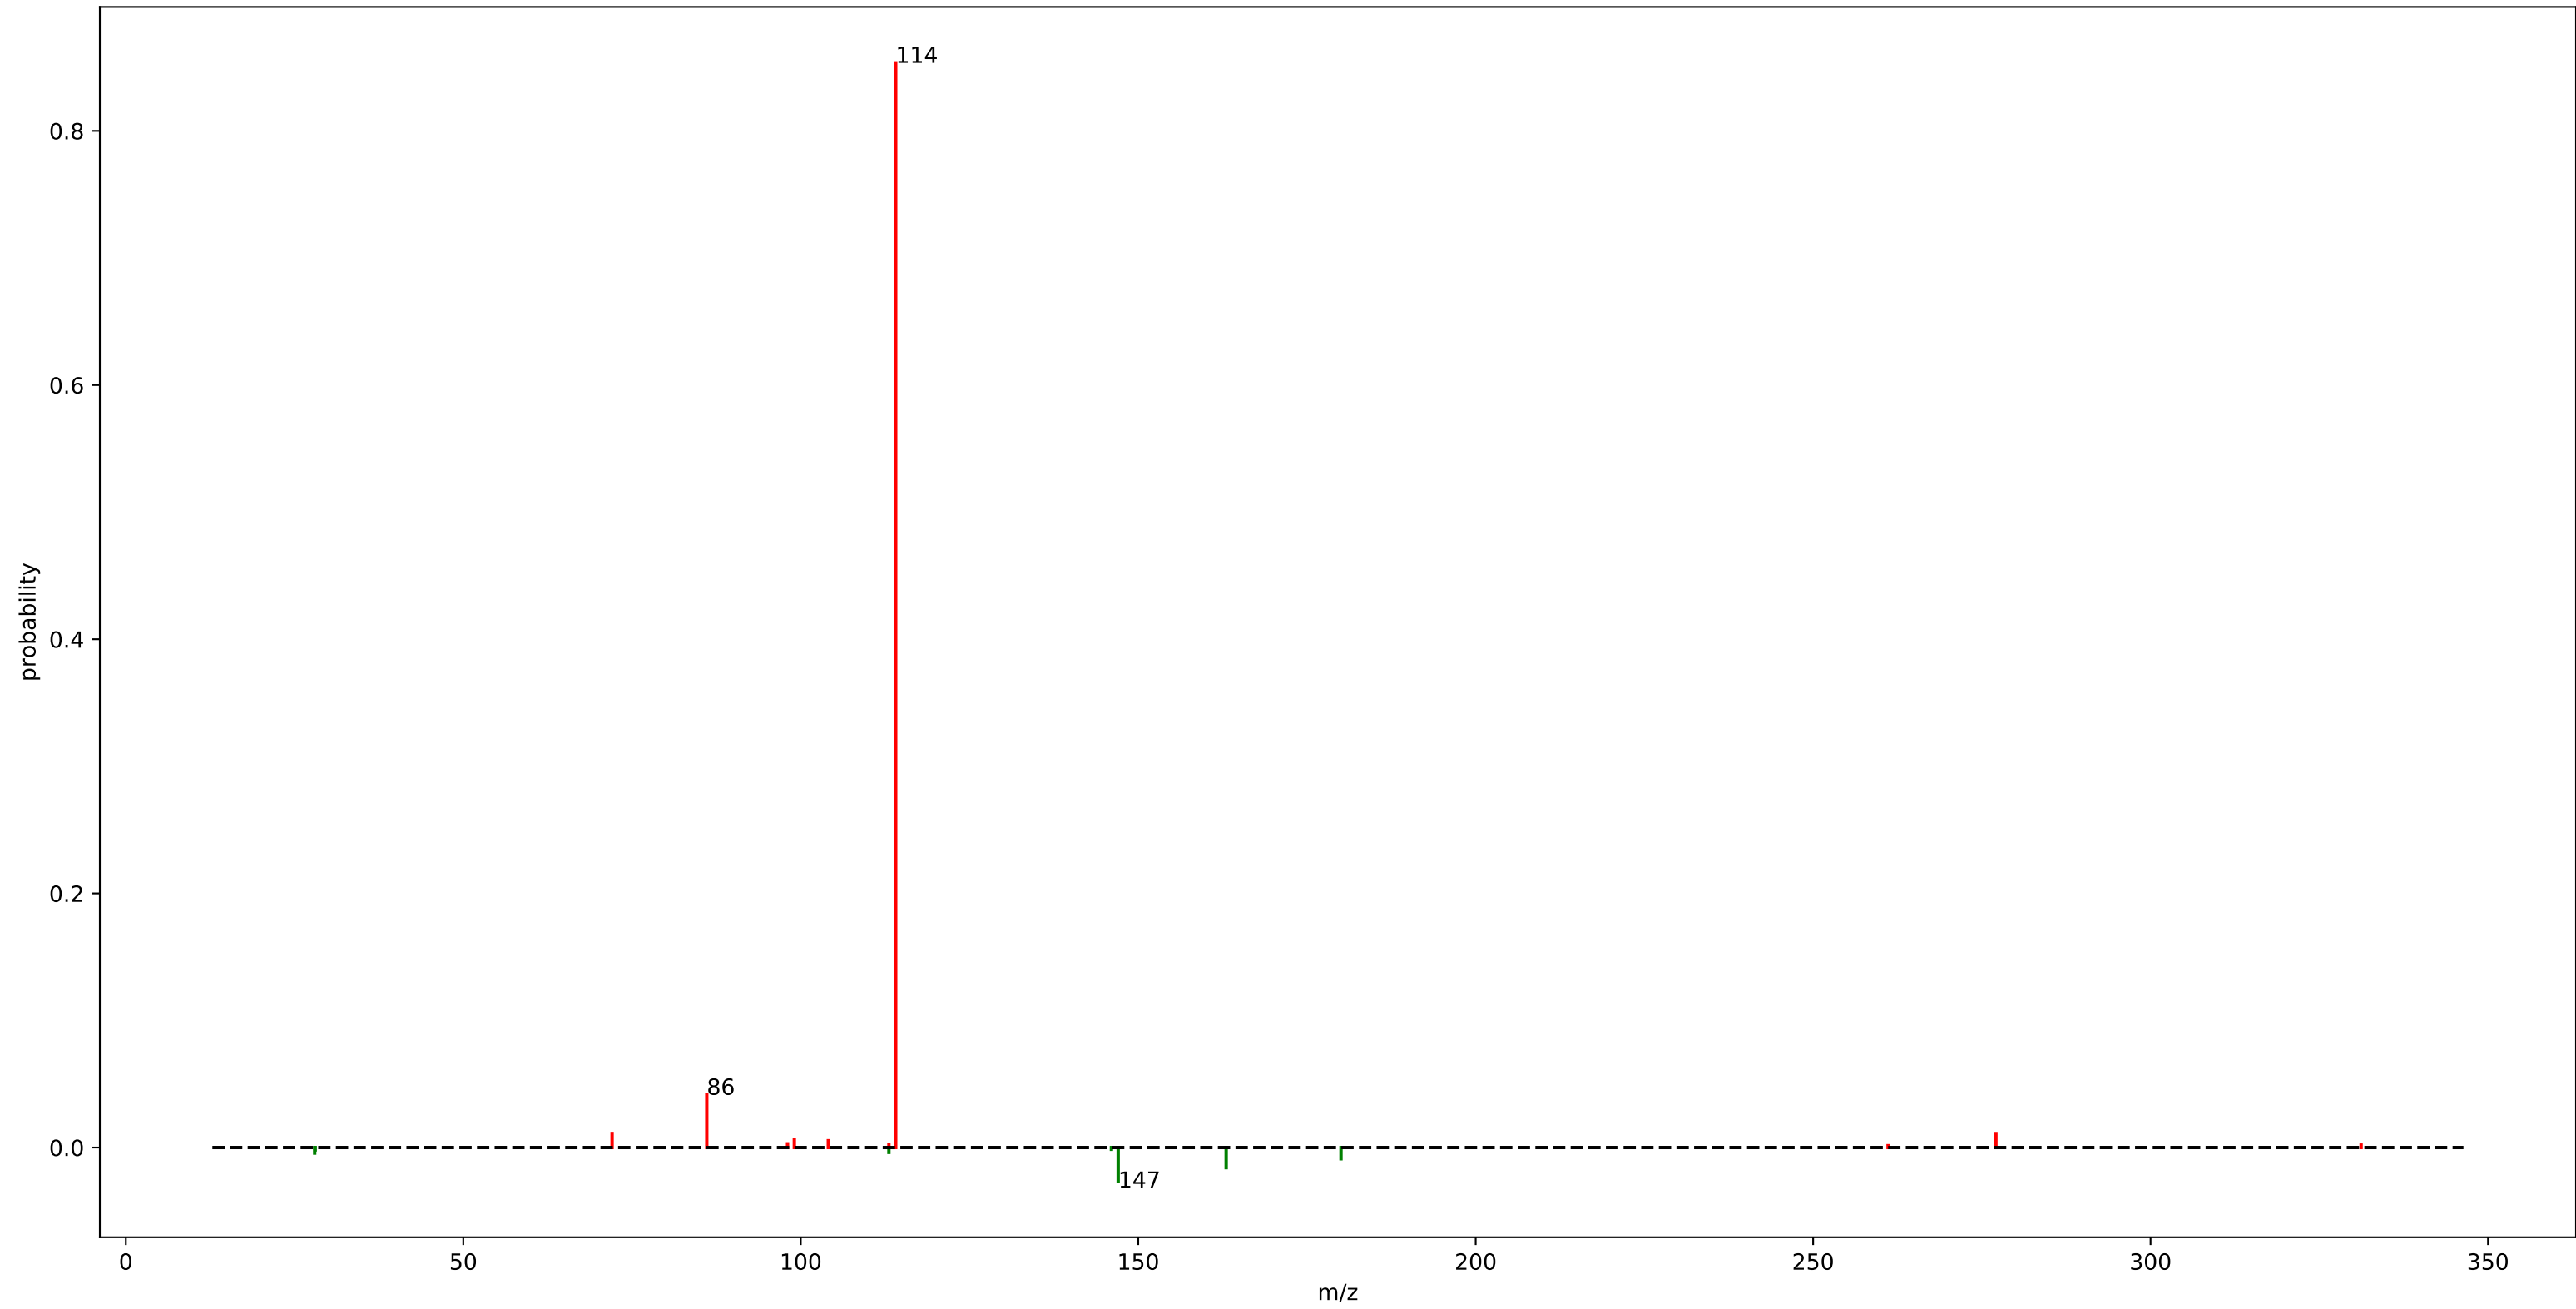

## urine\_mass2motif\_194.m2m

|                   |        |
|-------------------|--------|
| fragment_114.0675 | : 0.85 |
| fragment_86.0725  | : 0.04 |
| loss_147.0275     | : 0.03 |
| loss_163.0275     | : 0.02 |
| fragment_72.0425  | : 0.01 |
| fragment_277.0875 | : 0.01 |
| loss_180.0425     | : 0.01 |
| fragment_99.0425  | : 0.01 |
| fragment_104.0825 | : 0.01 |

urine\_mass2motif\_93.m2m

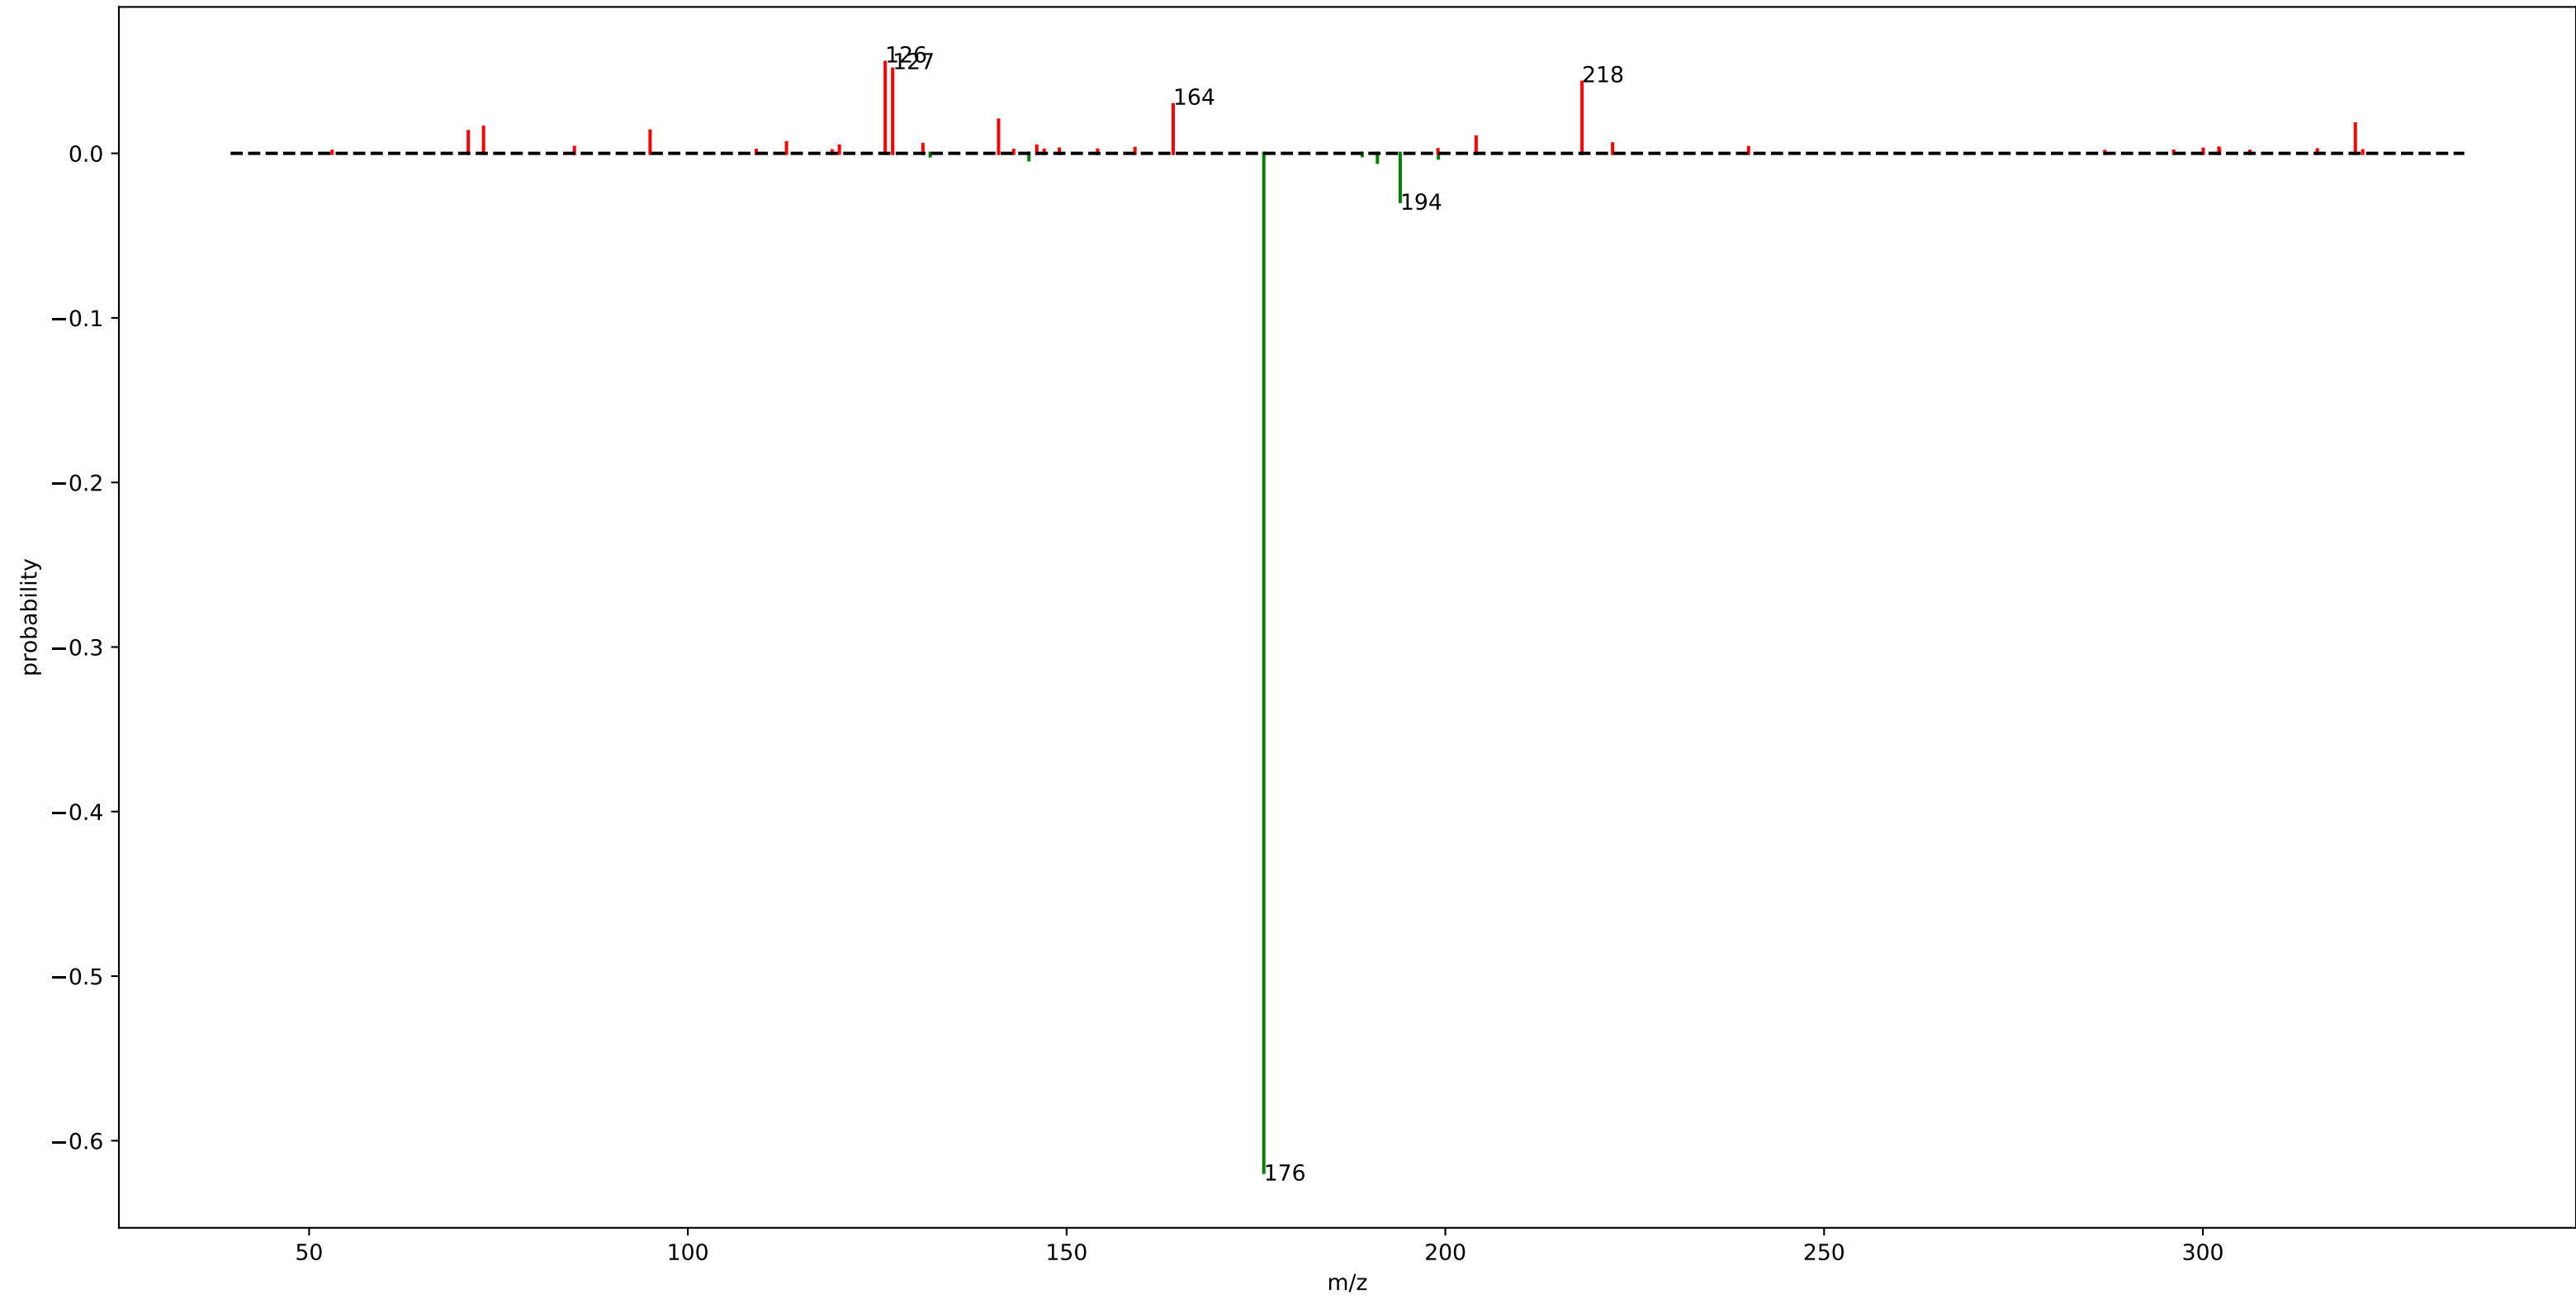

## urine\_mass2motif\_93.m2m

|                   |        |
|-------------------|--------|
| loss_176.0325     | : 0.62 |
| fragment_126.0525 | : 0.06 |
| fragment_127.0375 | : 0.05 |
| fragment_218.0425 | : 0.04 |
| fragment_164.0725 | : 0.03 |
| loss_194.0425     | : 0.03 |
| fragment_141.0175 | : 0.02 |
| fragment_320.1325 | : 0.02 |
| fragment_73.0275  | : 0.02 |
| fragment_95.0125  | : 0.01 |
| fragment_71.0125  | : 0.01 |
| fragment_204.0625 | : 0.01 |
| fragment_113.0225 | : 0.01 |
| fragment_222.0775 | : 0.01 |
| fragment_131.0325 | : 0.01 |
| loss_191.0325     | : 0.01 |



motif\_618

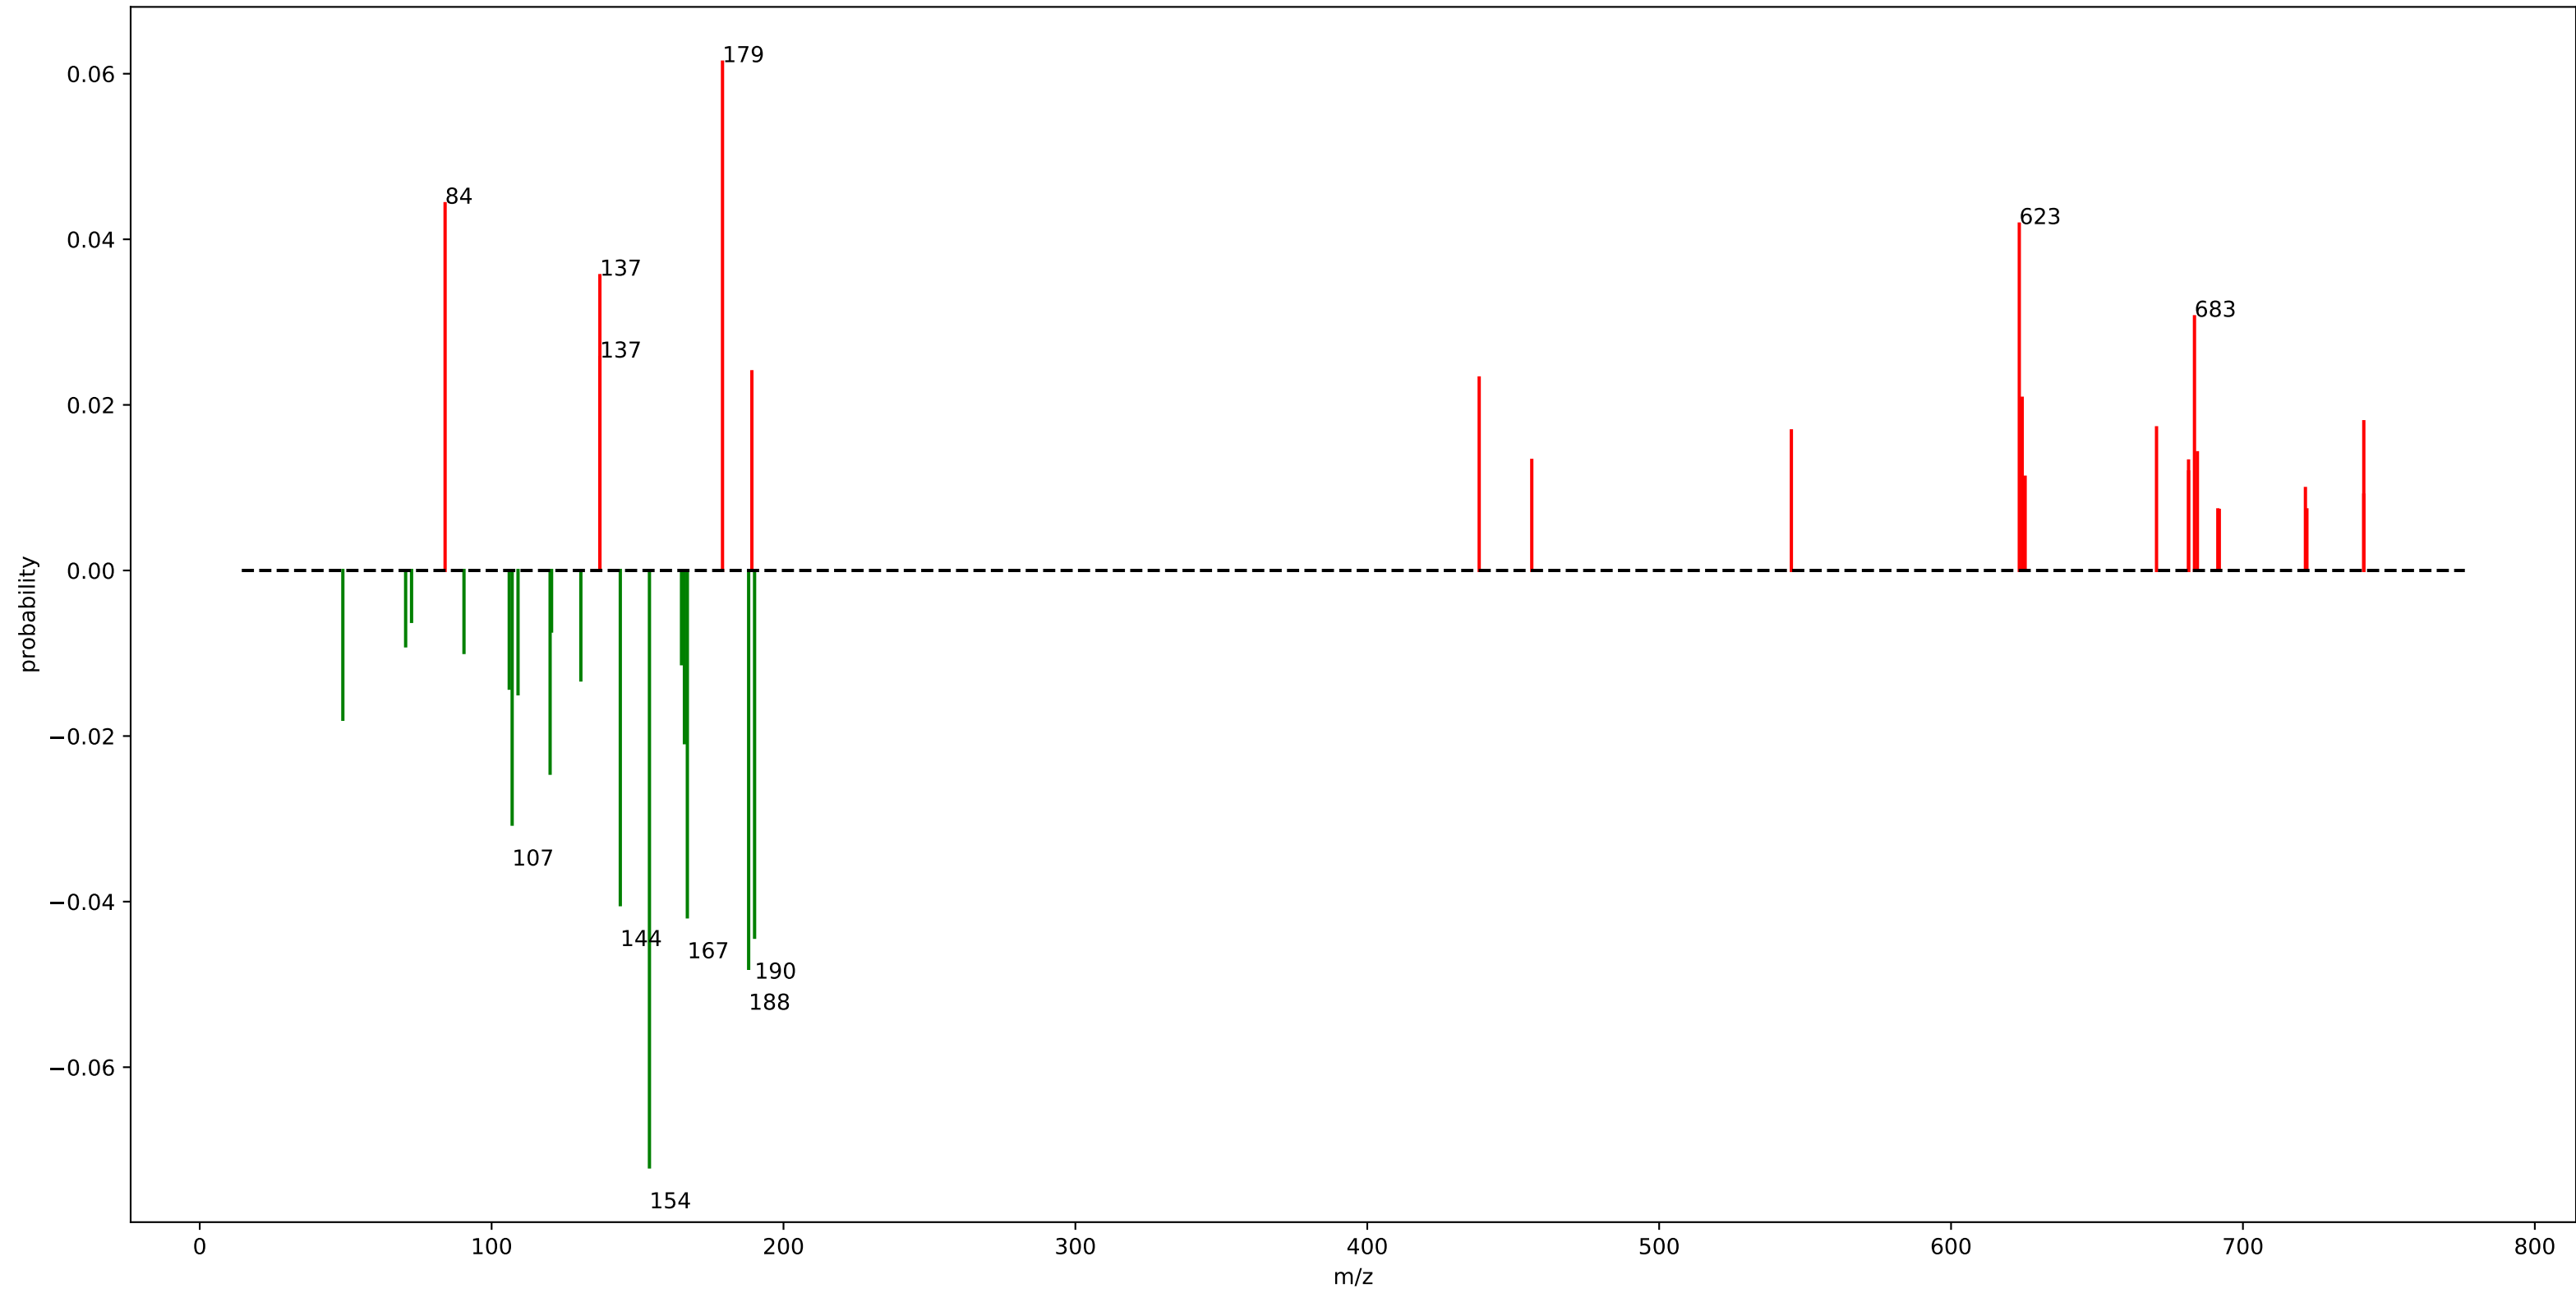

# motif\_618

|                   |        |                   |        |
|-------------------|--------|-------------------|--------|
| loss_154.0725     | : 0.07 | fragment_545.2975 | : 0.02 |
| fragment_179.1025 | : 0.06 | loss_109.0525     | : 0.01 |
| loss_188.0575     | : 0.05 | loss_106.0375     | : 0.01 |
| fragment_84.0625  | : 0.04 | fragment_684.4025 | : 0.01 |
| loss_190.0925     | : 0.04 | fragment_456.3575 | : 0.01 |
| fragment_623.3775 | : 0.04 | fragment_681.3725 | : 0.01 |
| loss_167.0575     | : 0.04 | loss_130.5725     | : 0.01 |
| loss_144.0875     | : 0.04 | fragment_681.3875 | : 0.01 |
| fragment_137.0925 | : 0.04 | loss_165.0575     | : 0.01 |
| fragment_683.3975 | : 0.03 | fragment_625.3825 | : 0.01 |
| loss_107.0375     | : 0.03 | loss_90.5325      | : 0.01 |
| fragment_137.0975 | : 0.03 | fragment_721.4075 | : 0.01 |
| loss_120.0425     | : 0.02 | loss_70.5475      | : 0.01 |
| fragment_189.1625 | : 0.02 | fragment_741.3975 | : 0.01 |
| fragment_438.3425 | : 0.02 | loss_120.5425     | : 0.01 |
| loss_166.0575     | : 0.02 | fragment_691.3975 | : 0.01 |
| fragment_624.3825 | : 0.02 | fragment_721.9125 | : 0.01 |
| loss_49.0325      | : 0.02 | fragment_691.9025 | : 0.01 |
| fragment_741.4075 | : 0.02 | loss_72.5725      | : 0.01 |
| fragment_670.3975 | : 0.02 |                   |        |

motif\_592

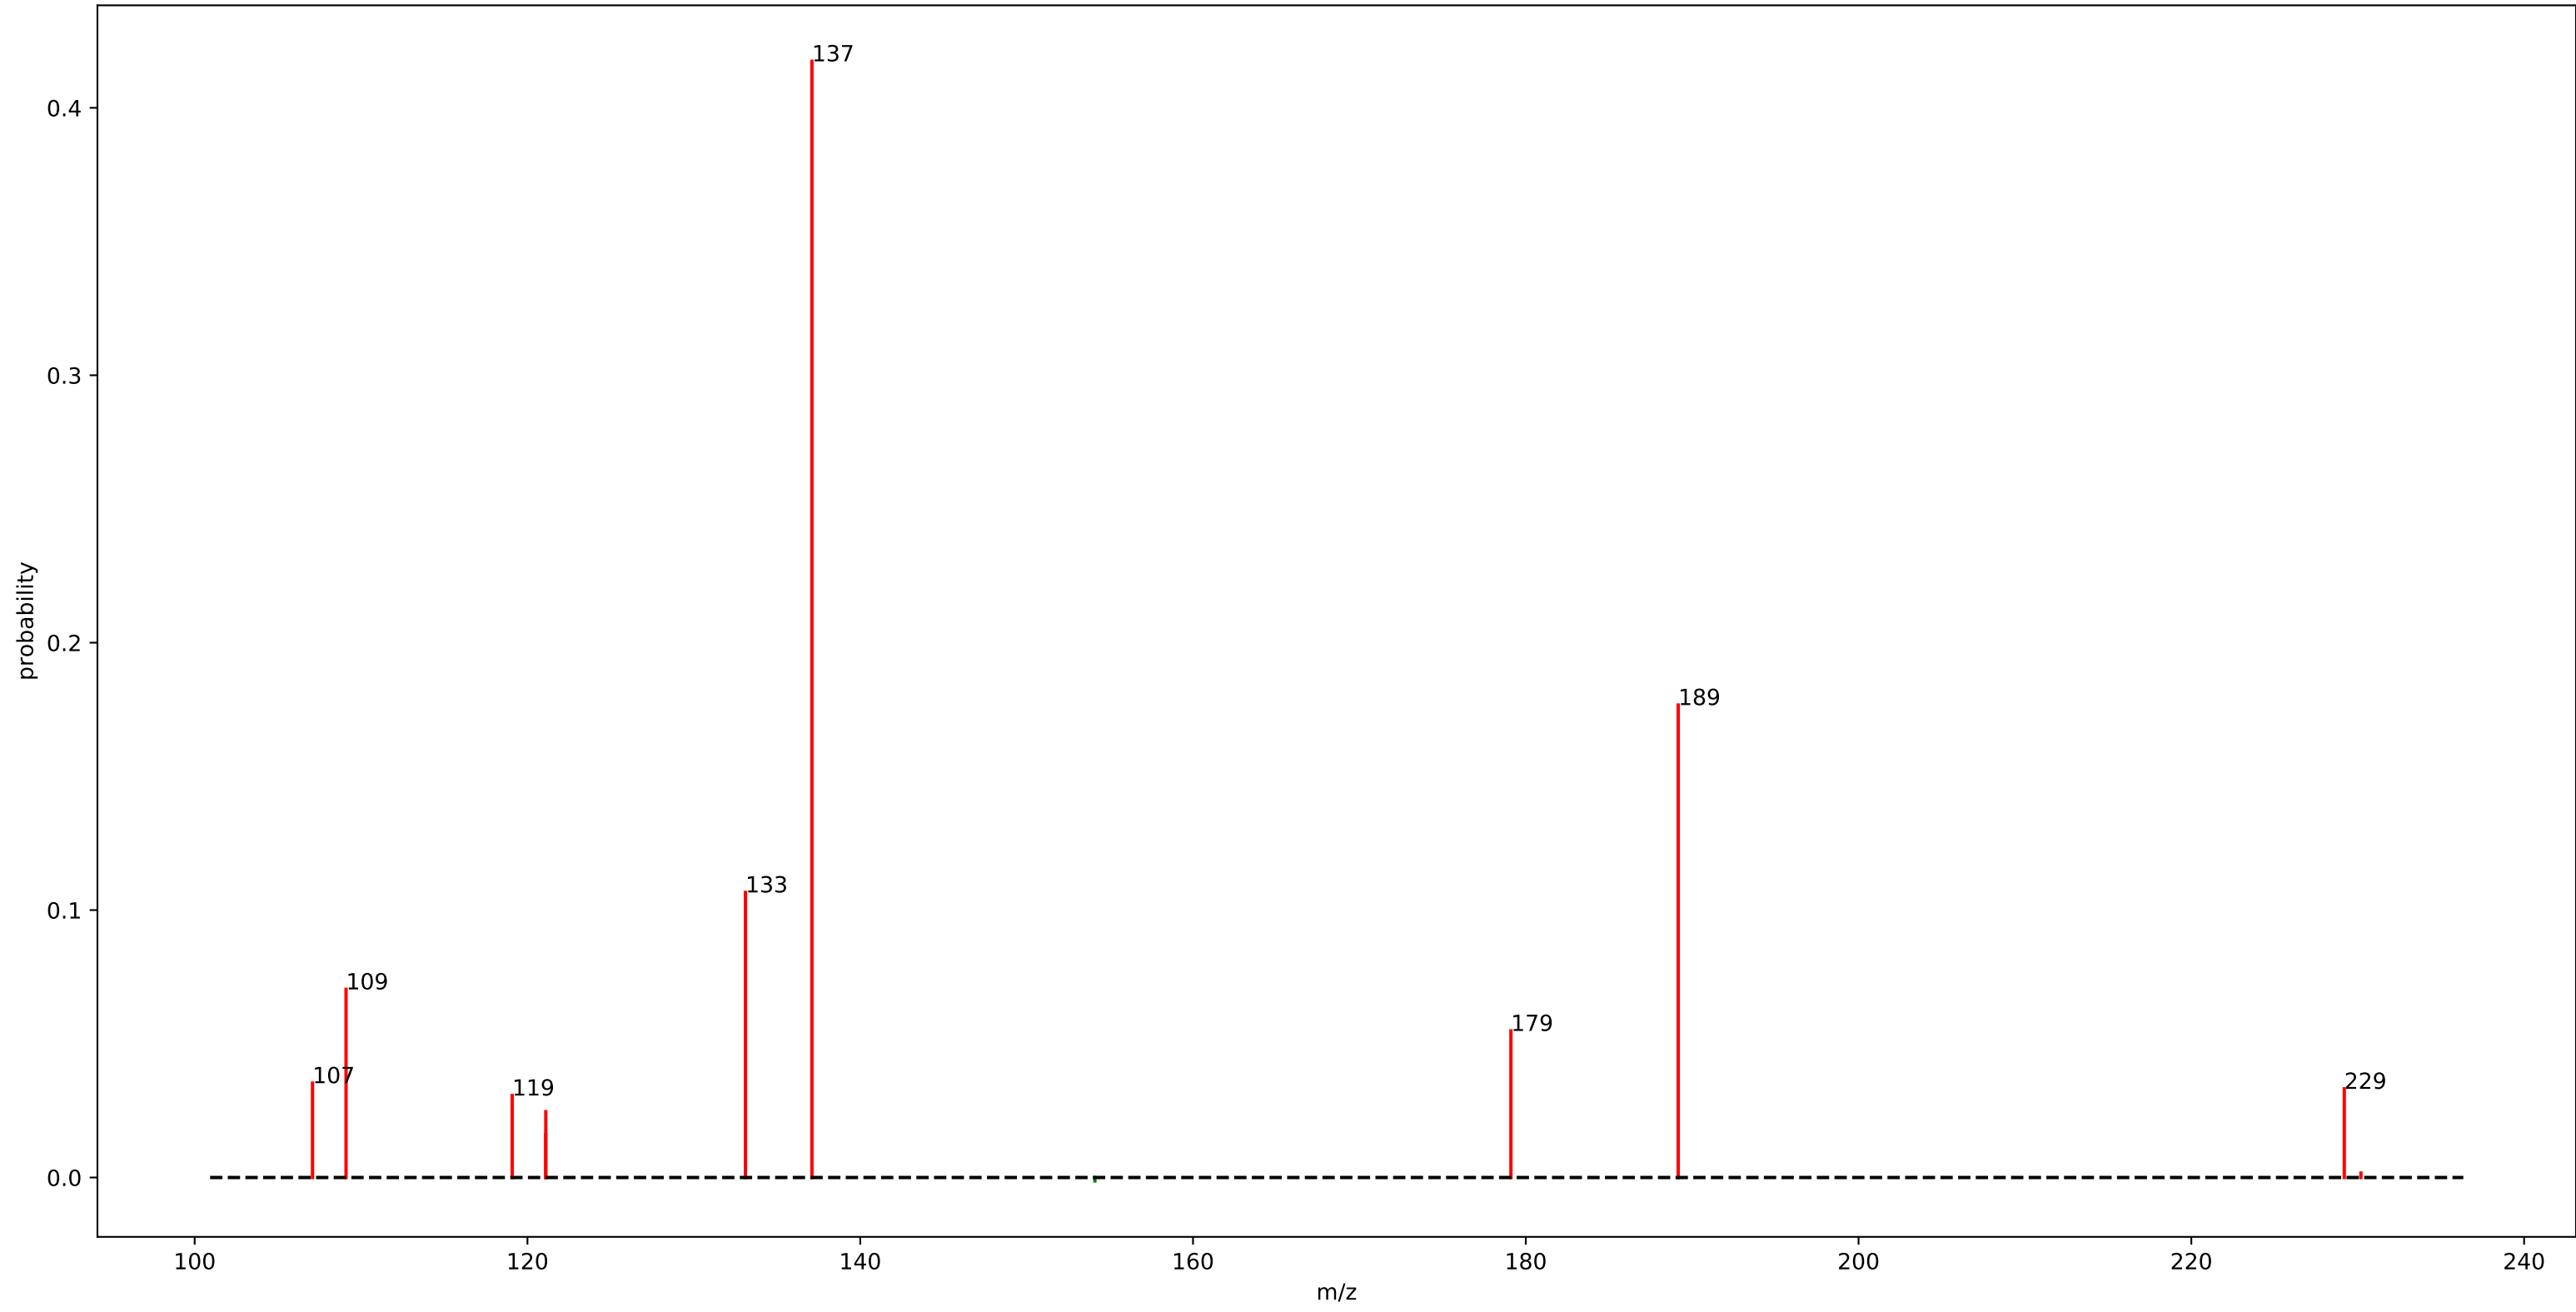

## motif\_592

|                   |        |
|-------------------|--------|
| fragment_137.0975 | : 0.42 |
| fragment_189.1625 | : 0.18 |
| fragment_133.1025 | : 0.11 |
| fragment_109.0975 | : 0.07 |
| fragment_179.1075 | : 0.05 |
| fragment_107.0825 | : 0.04 |
| fragment_229.1925 | : 0.03 |
| fragment_119.0825 | : 0.03 |
| fragment_121.1025 | : 0.02 |
| fragment_121.0975 | : 0.02 |

gnps\_motif\_55.m2m

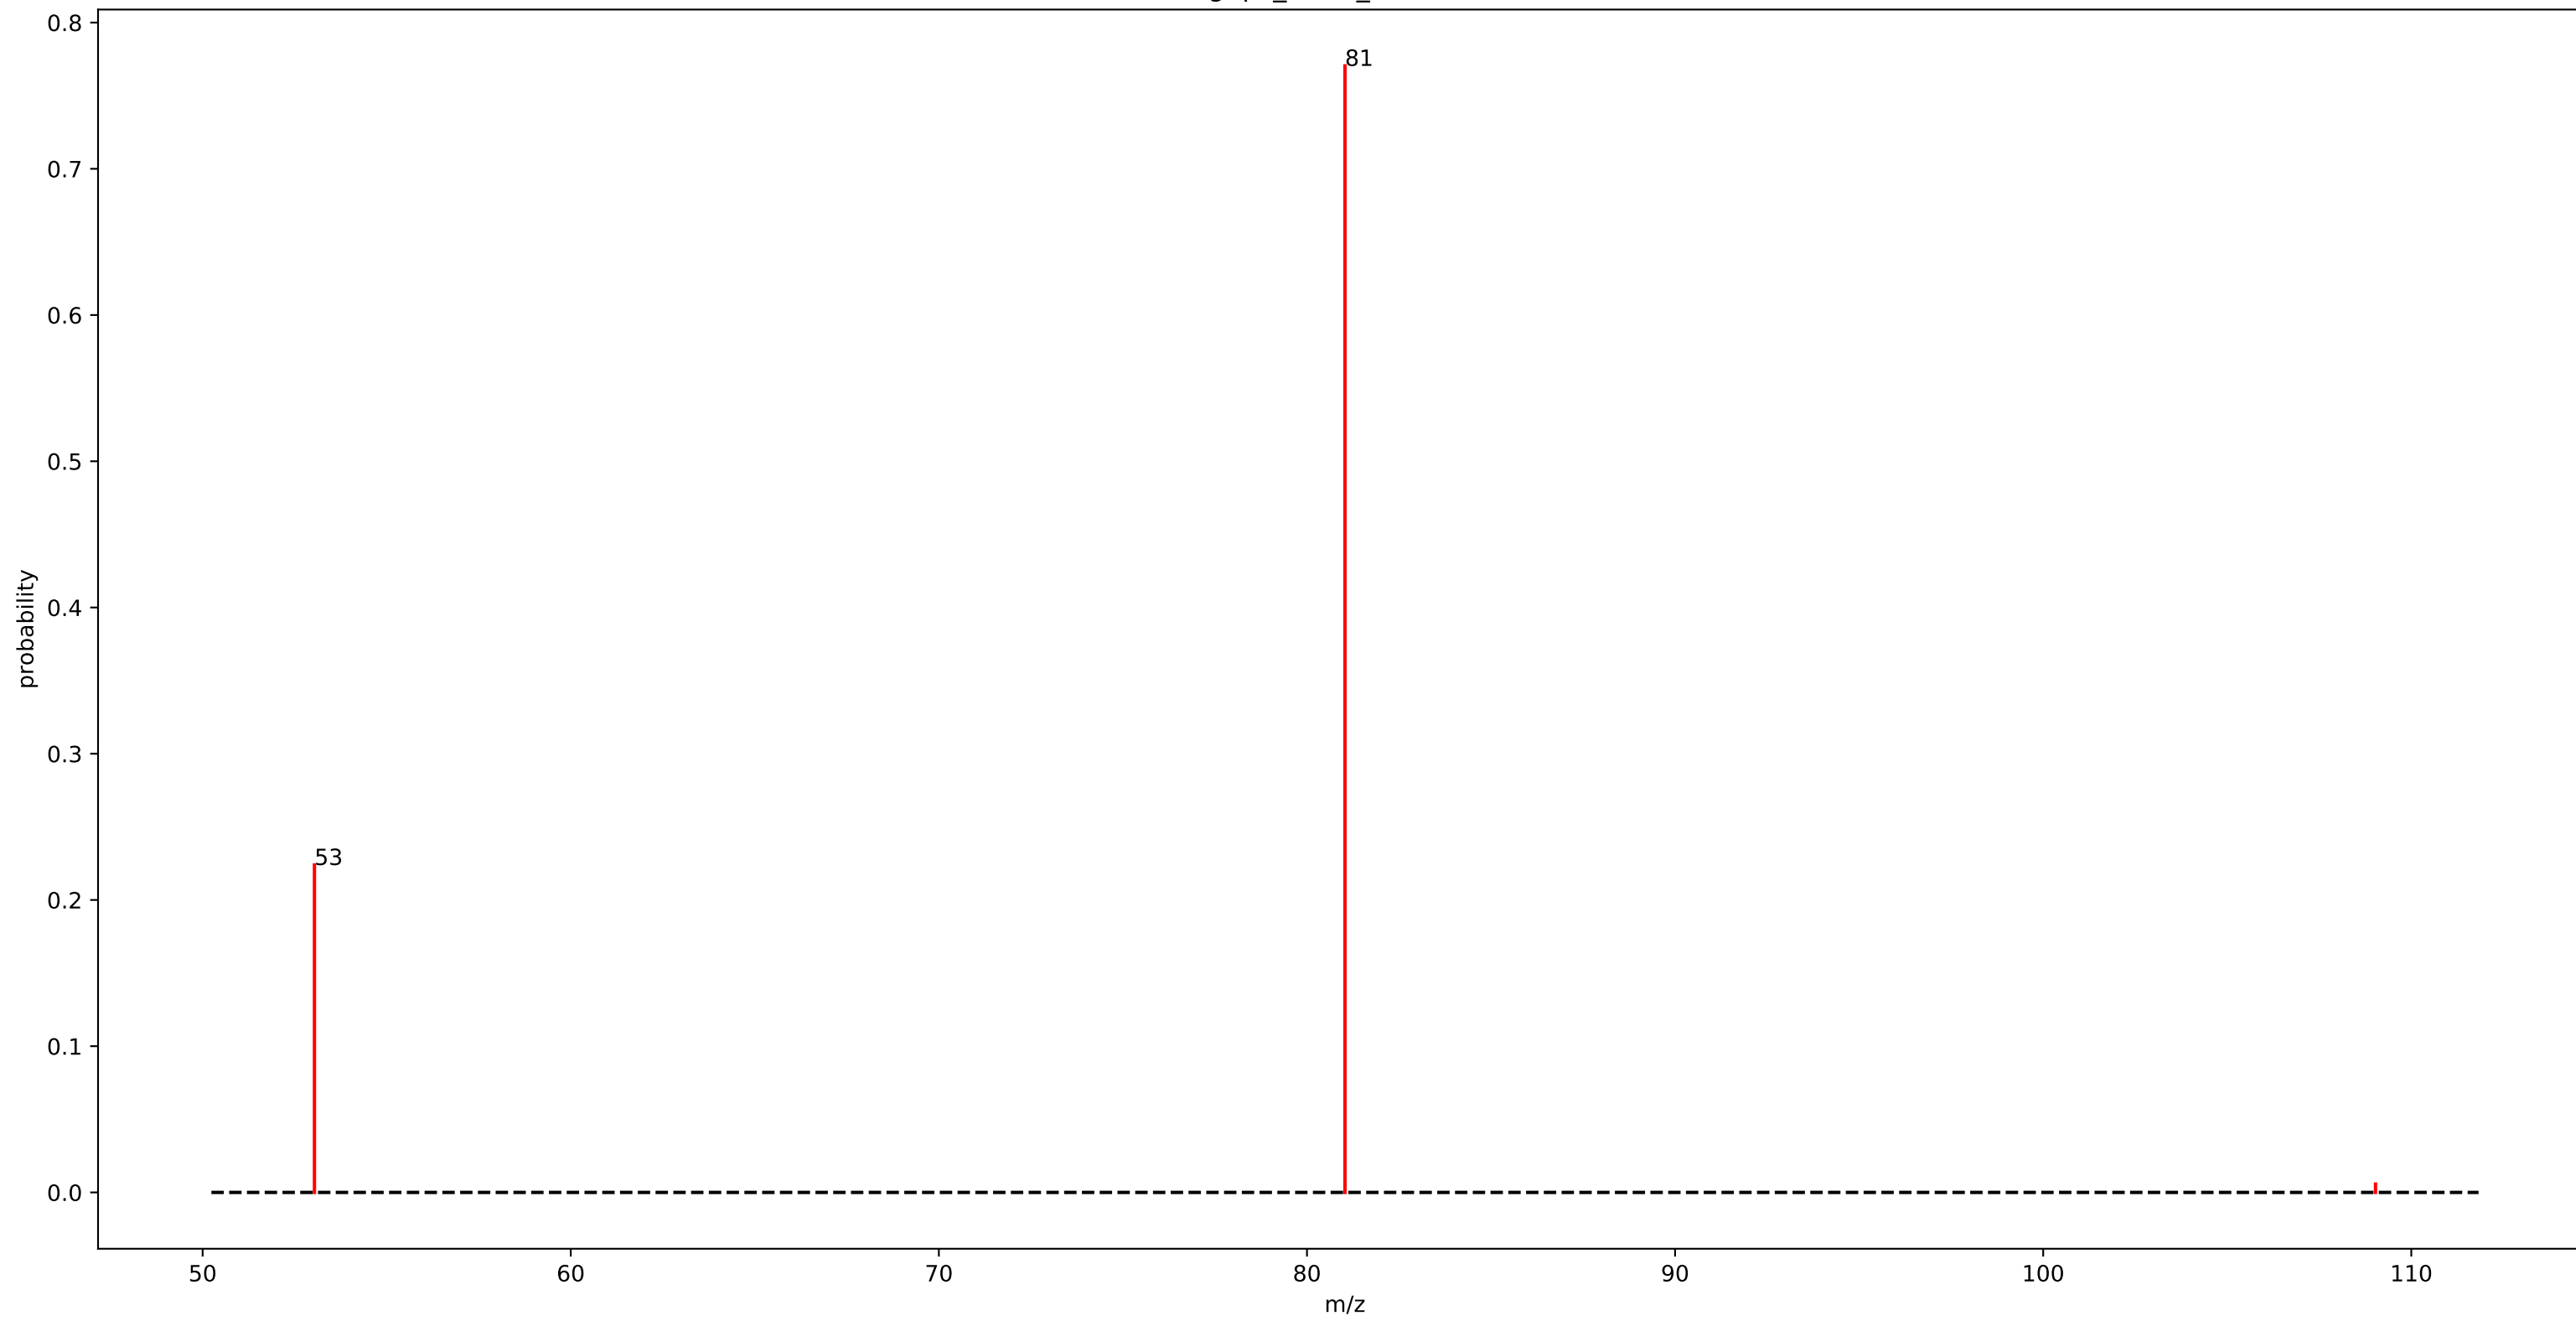

## gnps\_motif\_55.m2m

|                   |        |
|-------------------|--------|
| fragment_81.0325  | : 0.77 |
| fragment_53.0375  | : 0.22 |
| fragment_109.0275 | : 0.01 |

urine\_mass2motif\_41.m2m

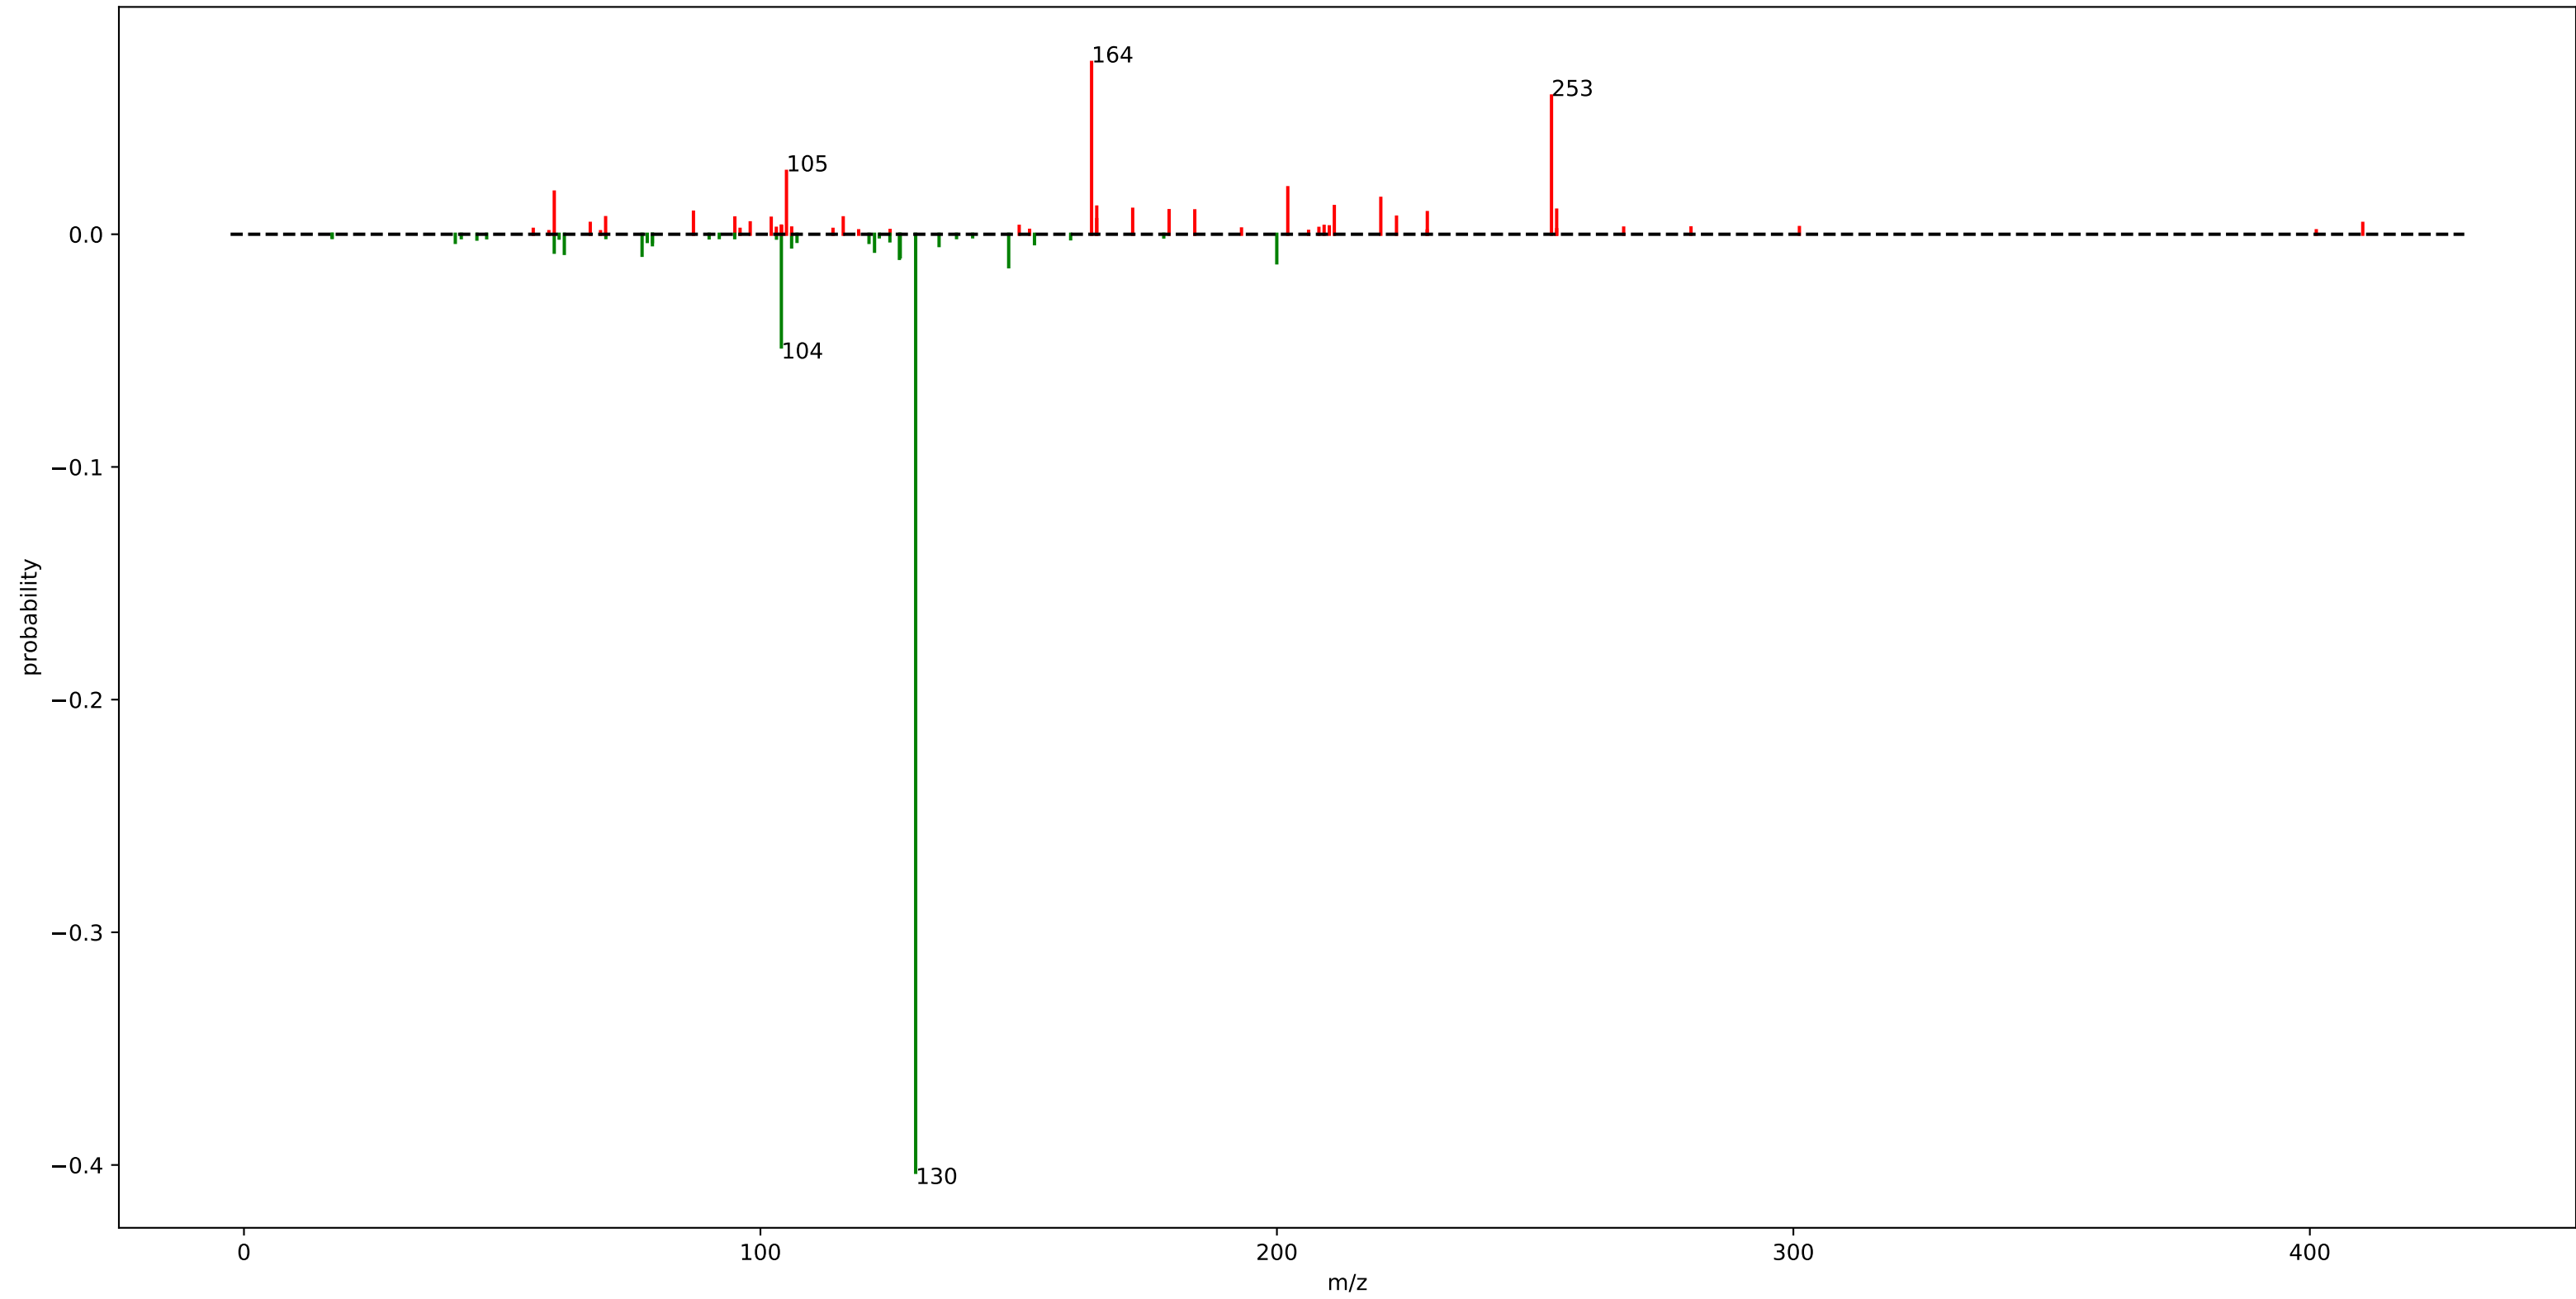

# urine\_mass2motif\_41.m2m

|                   |        |                   |        |
|-------------------|--------|-------------------|--------|
| loss_130.0575     | : 0.40 | loss_77.0825      | : 0.01 |
| fragment_164.1175 | : 0.07 | loss_62.0275      | : 0.01 |
| fragment_253.1675 | : 0.06 | loss_60.0775      | : 0.01 |
| loss_104.0525     | : 0.05 | fragment_223.1575 | : 0.01 |
| fragment_105.0425 | : 0.03 | loss_122.0925     | : 0.01 |
| fragment_202.1075 | : 0.02 | fragment_70.0275  | : 0.01 |
| fragment_60.0825  | : 0.02 | fragment_116.0325 | : 0.01 |
| fragment_220.1175 | : 0.02 | fragment_95.0475  | : 0.01 |
| loss_148.0675     | : 0.01 | fragment_102.0925 | : 0.01 |
| loss_199.9775     | : 0.01 | fragment_165.1125 | : 0.01 |
| fragment_211.1175 | : 0.01 | loss_106.0375     | : 0.01 |
| fragment_165.1175 | : 0.01 |                   |        |
| fragment_172.0775 | : 0.01 |                   |        |
| fragment_254.1675 | : 0.01 |                   |        |
| loss_126.9075     | : 0.01 |                   |        |
| fragment_179.1275 | : 0.01 |                   |        |
| fragment_184.0975 | : 0.01 |                   |        |
| loss_127.0725     | : 0.01 |                   |        |
| fragment_87.0325  | : 0.01 |                   |        |
| fragment_229.1225 | : 0.01 |                   |        |



motif\_614

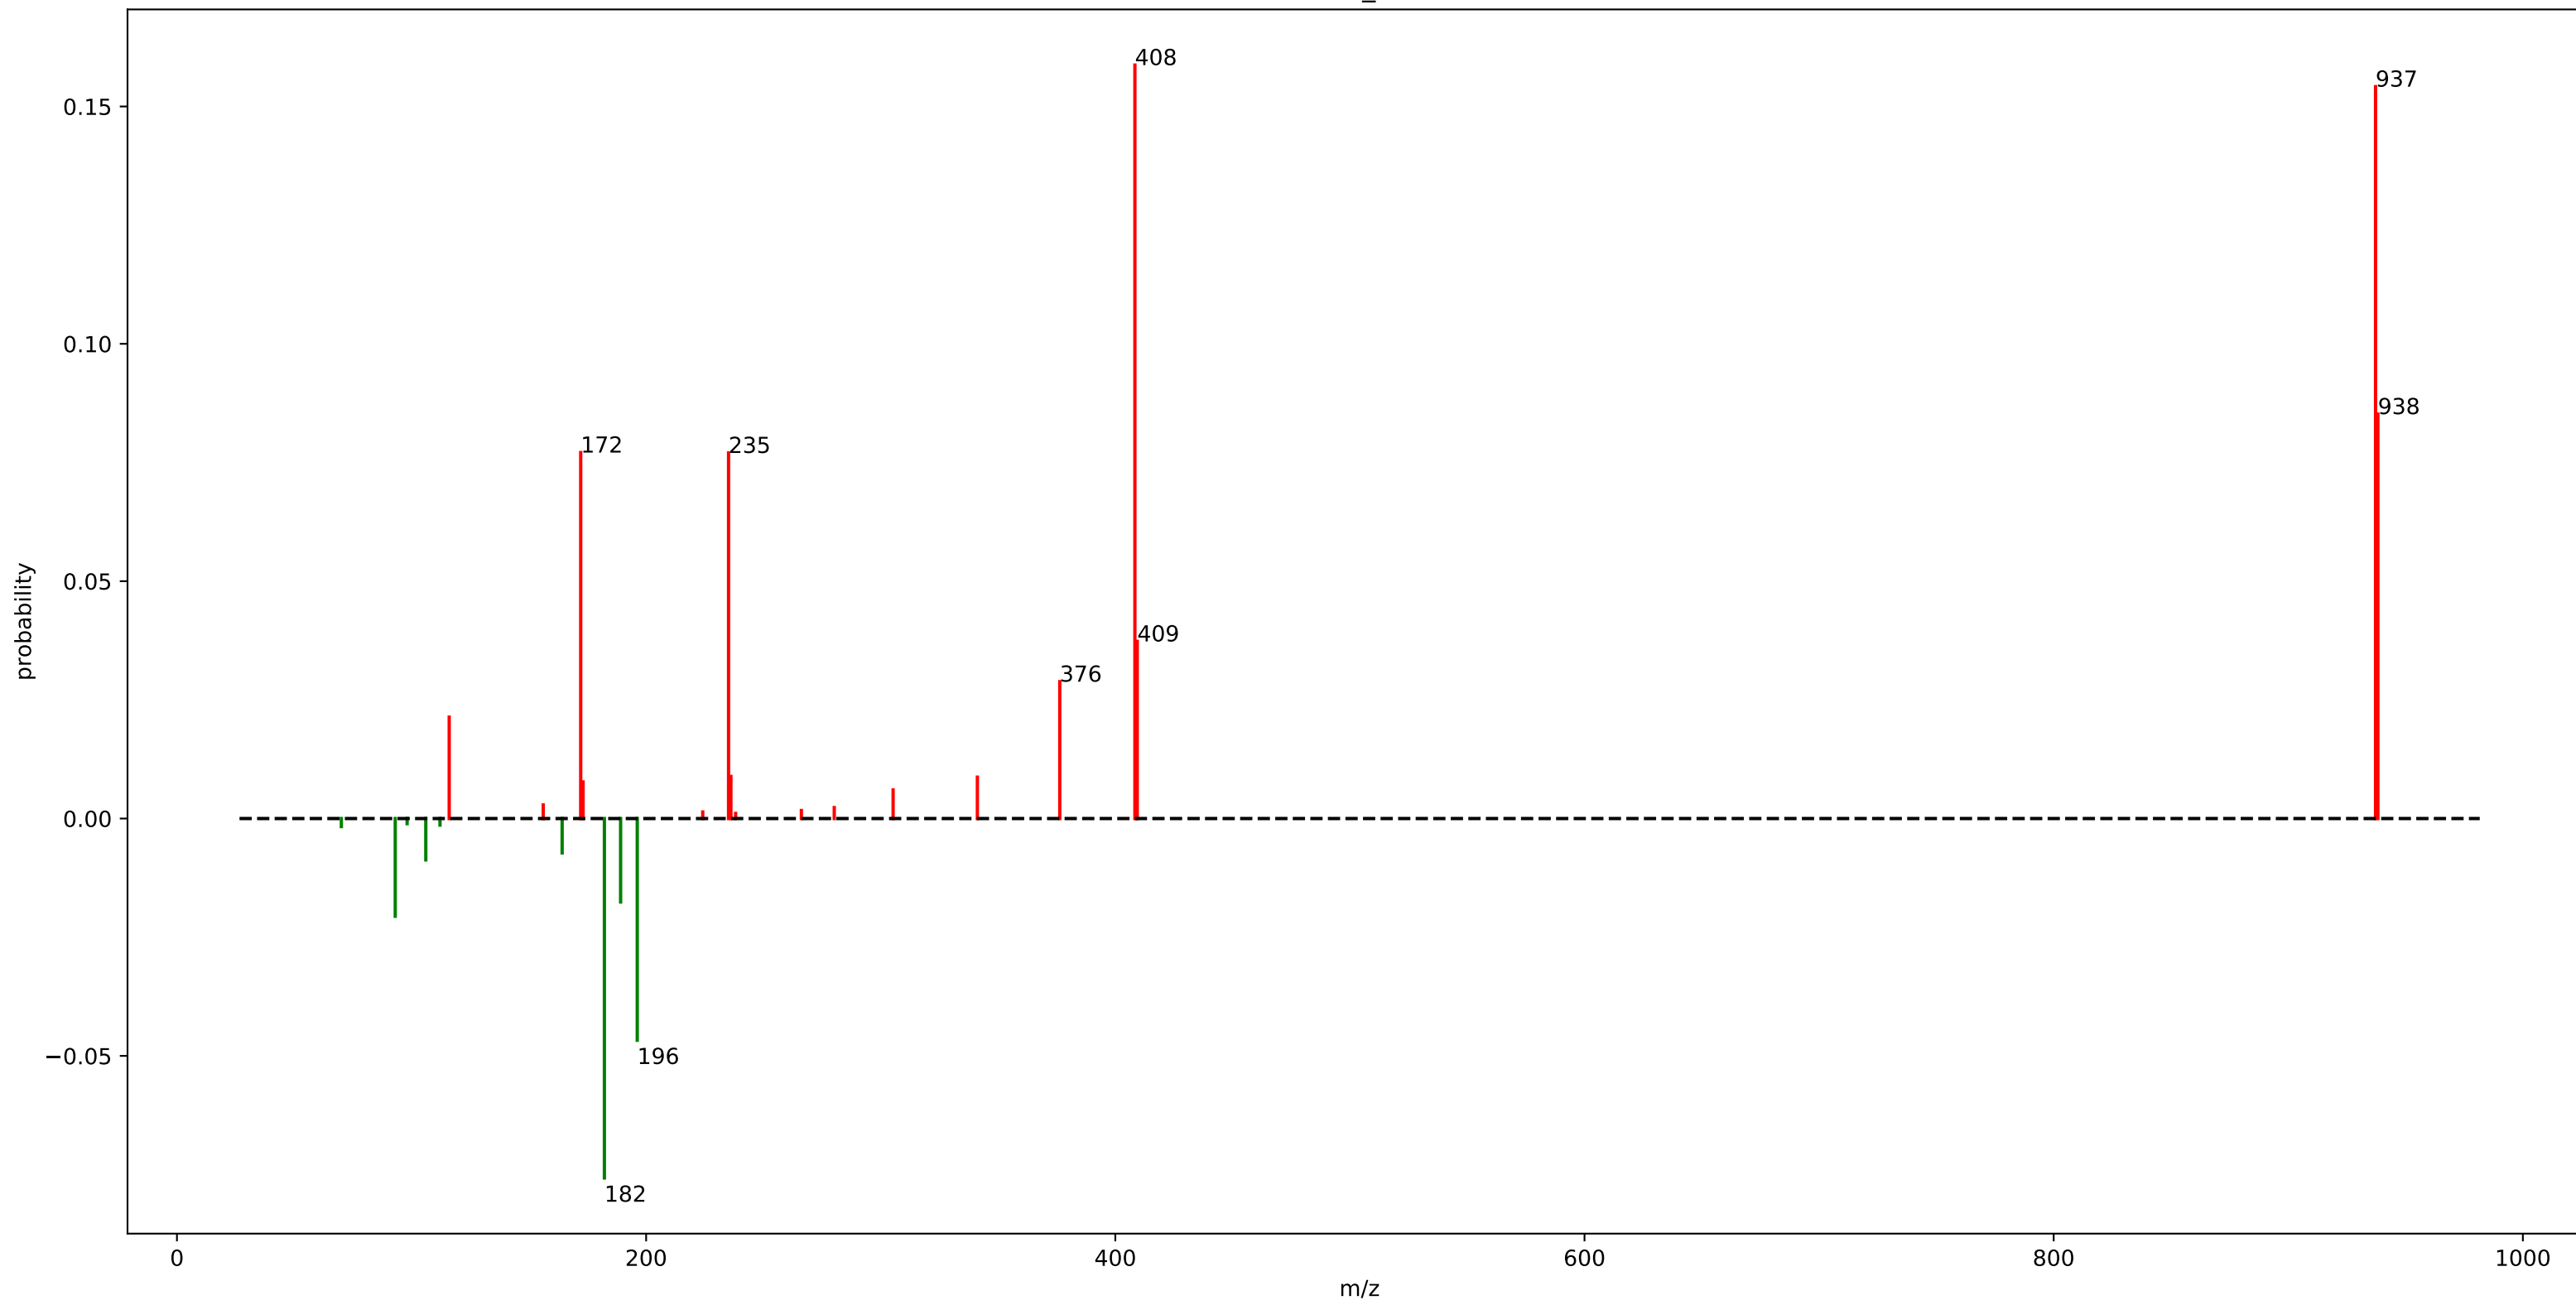

## motif\_614

|                   |        |
|-------------------|--------|
| fragment_408.3475 | : 0.16 |
| fragment_937.2025 | : 0.15 |
| fragment_938.2025 | : 0.09 |
| fragment_172.1125 | : 0.08 |
| fragment_235.1325 | : 0.08 |
| loss_182.2025     | : 0.08 |
| loss_196.2125     | : 0.05 |
| fragment_409.3525 | : 0.04 |
| fragment_376.3225 | : 0.03 |
| fragment_116.0525 | : 0.02 |
| loss_93.0475      | : 0.02 |
| loss_189.1175     | : 0.02 |
| fragment_236.1325 | : 0.01 |
| fragment_341.1975 | : 0.01 |
| loss_106.0725     | : 0.01 |
| fragment_173.1175 | : 0.01 |
| loss_164.1925     | : 0.01 |
| fragment_305.2825 | : 0.01 |

motif\_615

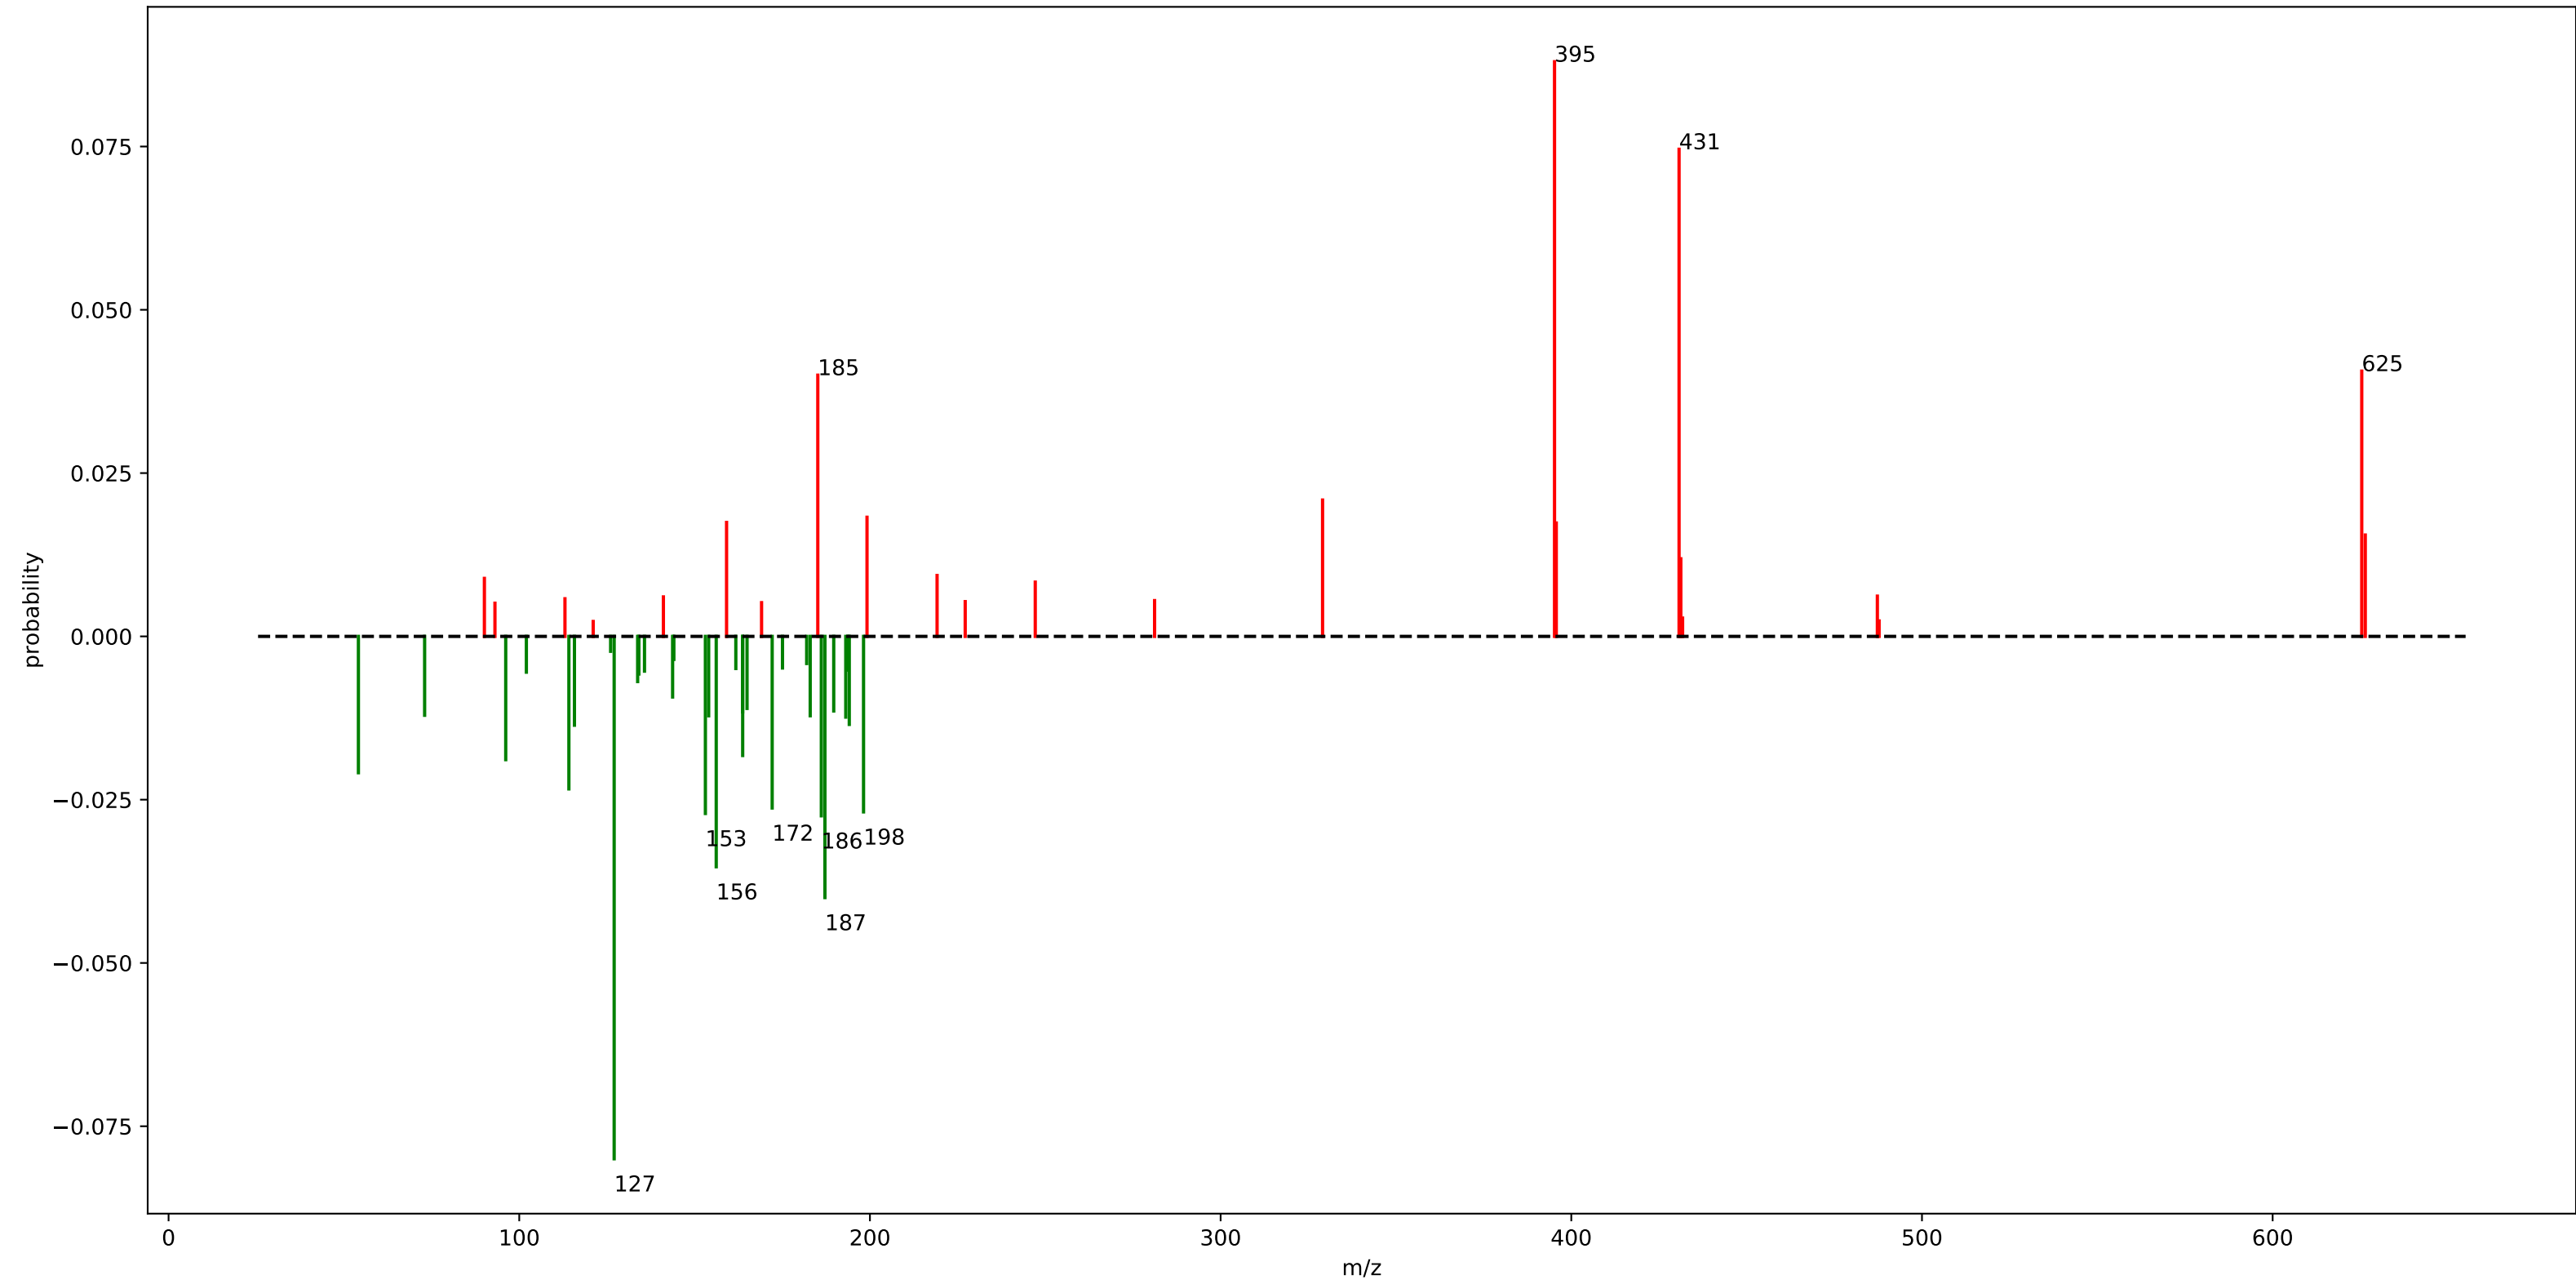

# motif\_615

|                   |        |                   |        |                   |        |
|-------------------|--------|-------------------|--------|-------------------|--------|
| fragment_395.2175 | : 0.09 | loss_115.7375     | : 0.01 | fragment_281.1725 | : 0.01 |
| loss_127.0625     | : 0.08 | loss_194.1075     | : 0.01 | loss_135.7125     | : 0.01 |
| fragment_430.7325 | : 0.07 | loss_193.1075     | : 0.01 | fragment_227.1675 | : 0.01 |
| fragment_625.4075 | : 0.04 | loss_154.0125     | : 0.01 | fragment_169.0975 | : 0.01 |
| fragment_185.1325 | : 0.04 | loss_182.9675     | : 0.01 | loss_193.7825     | : 0.01 |
| loss_187.1675     | : 0.04 | loss_73.0175      | : 0.01 | fragment_93.0675  | : 0.01 |
| loss_156.1675     | : 0.04 | fragment_431.2375 | : 0.01 |                   |        |
| loss_186.1375     | : 0.03 | loss_163.7025     | : 0.01 |                   |        |
| loss_153.0775     | : 0.03 | loss_189.6775     | : 0.01 |                   |        |
| loss_198.1775     | : 0.03 | loss_164.9575     | : 0.01 |                   |        |
| loss_172.1225     | : 0.03 | fragment_219.1475 | : 0.01 |                   |        |
| loss_114.1525     | : 0.02 | loss_143.7325     | : 0.01 |                   |        |
| loss_54.1325      | : 0.02 | fragment_90.0575  | : 0.01 |                   |        |
| fragment_329.0725 | : 0.02 | fragment_247.1425 | : 0.01 |                   |        |
| loss_96.1425      | : 0.02 | loss_133.7625     | : 0.01 |                   |        |
| fragment_199.1675 | : 0.02 | fragment_487.2775 | : 0.01 |                   |        |
| loss_163.7125     | : 0.02 | fragment_141.1025 | : 0.01 |                   |        |
| fragment_159.1175 | : 0.02 | loss_134.1075     | : 0.01 |                   |        |
| fragment_395.7175 | : 0.02 | fragment_113.0325 | : 0.01 |                   |        |
| fragment_626.4125 | : 0.02 | loss_102.0275     | : 0.01 |                   |        |

urine\_mass2motif\_4.m2m

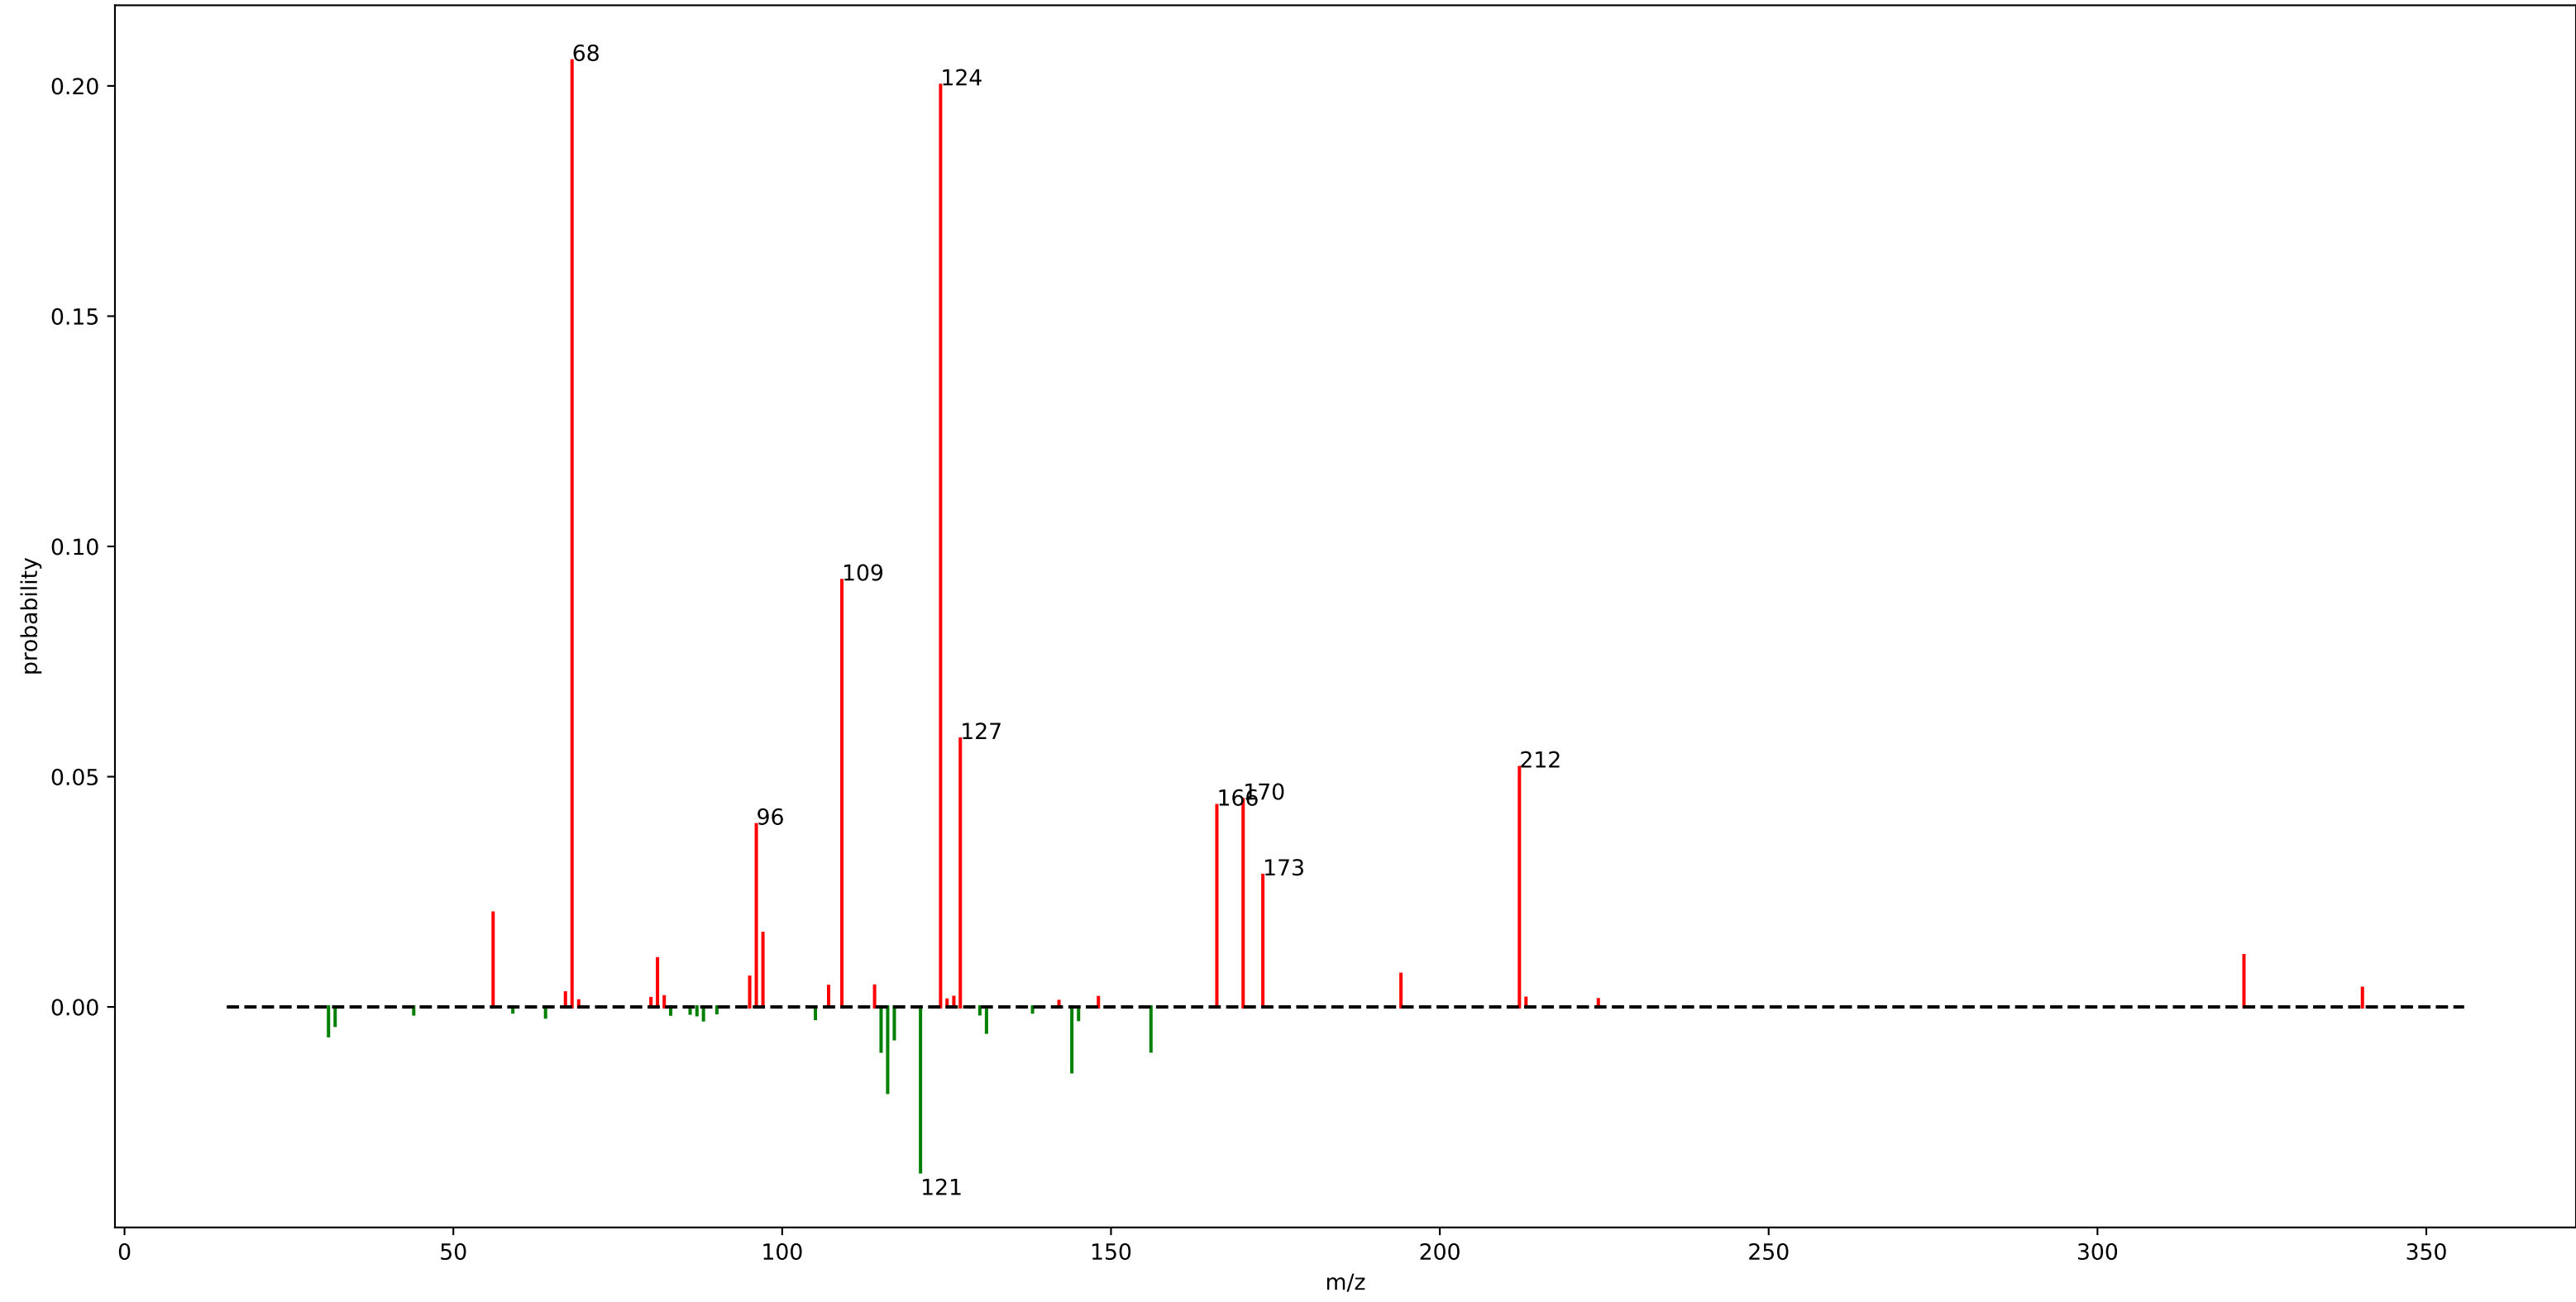

## urine\_mass2motif\_4.m2m

|                   |        |                  |        |
|-------------------|--------|------------------|--------|
| fragment_68.0475  | : 0.21 | fragment_95.0625 | : 0.01 |
| fragment_124.0875 | : 0.20 | loss_31.0175     | : 0.01 |
| fragment_109.0775 | : 0.09 | loss_131.0675    | : 0.01 |
| fragment_127.0875 | : 0.06 |                  |        |
| fragment_212.1025 | : 0.05 |                  |        |
| fragment_170.0925 | : 0.05 |                  |        |
| fragment_166.0975 | : 0.04 |                  |        |
| fragment_96.0675  | : 0.04 |                  |        |
| loss_121.0375     | : 0.04 |                  |        |
| fragment_173.0925 | : 0.03 |                  |        |
| fragment_56.0475  | : 0.02 |                  |        |
| loss_116.0425     | : 0.02 |                  |        |
| fragment_97.0775  | : 0.02 |                  |        |
| loss_144.0475     | : 0.01 |                  |        |
| fragment_322.2725 | : 0.01 |                  |        |
| fragment_81.0425  | : 0.01 |                  |        |
| loss_115.0425     | : 0.01 |                  |        |
| loss_156.0775     | : 0.01 |                  |        |
| fragment_194.0925 | : 0.01 |                  |        |
| loss_117.0525     | : 0.01 |                  |        |

motif\_682

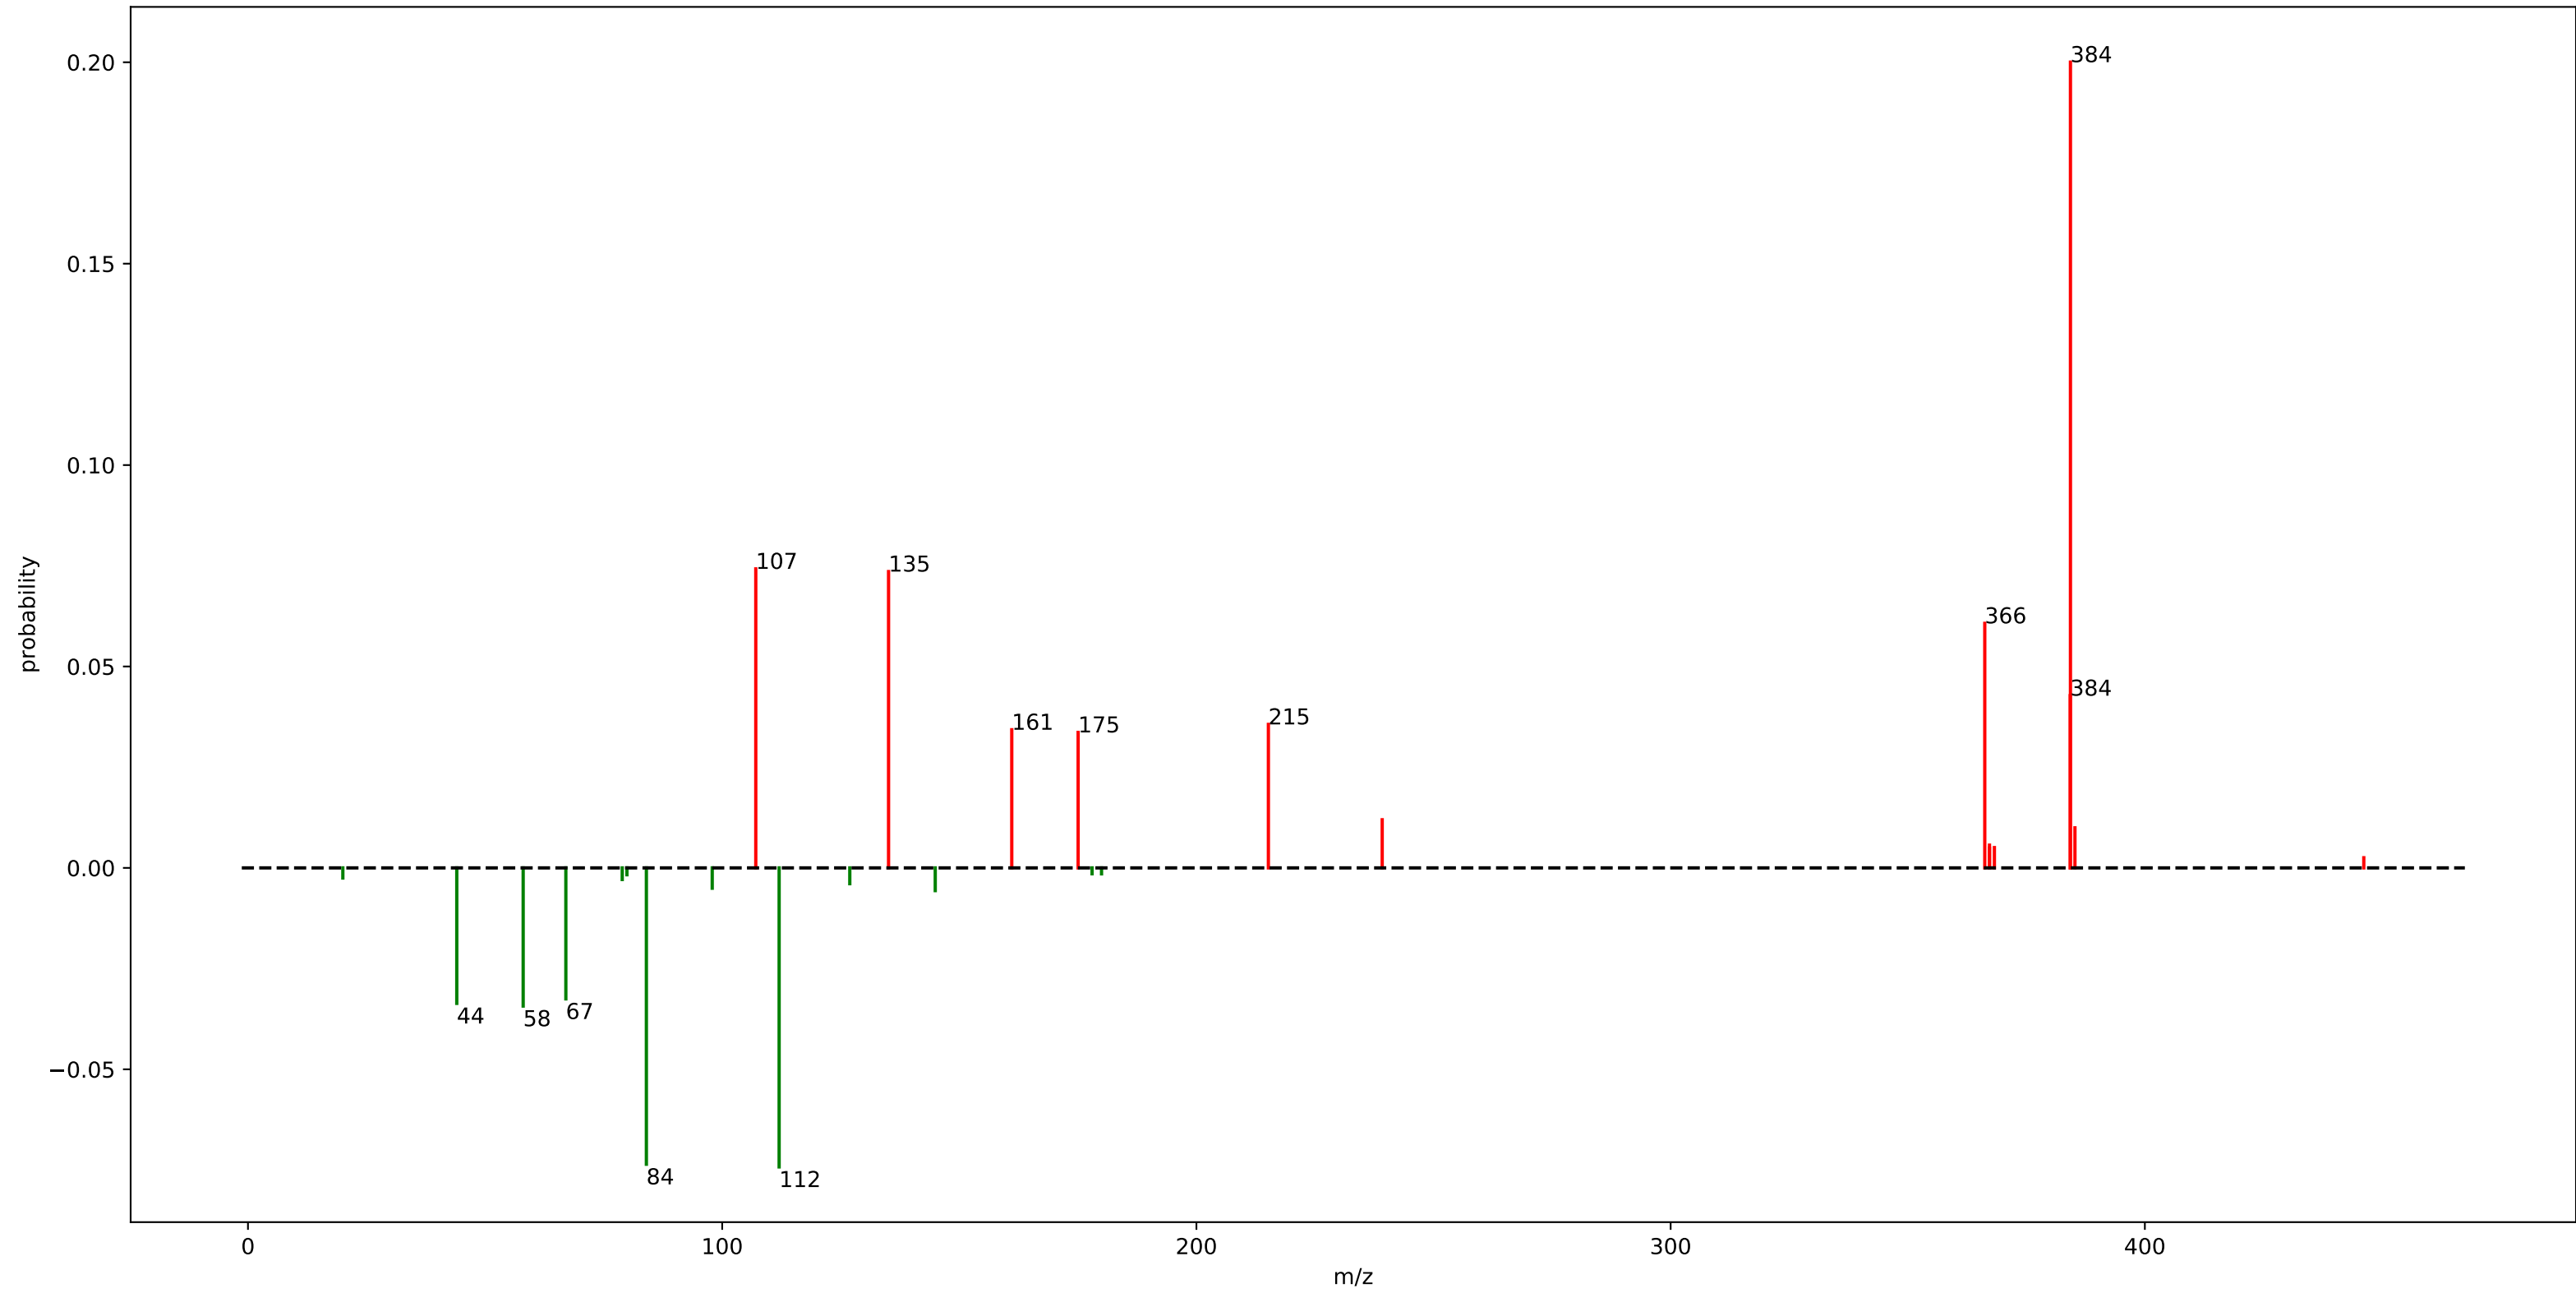

## motif\_682

|                   |        |
|-------------------|--------|
| fragment_384.3075 | : 0.20 |
| loss_112.0075     | : 0.07 |
| fragment_107.0825 | : 0.07 |
| fragment_135.0825 | : 0.07 |
| loss_84.0125      | : 0.07 |
| fragment_366.2425 | : 0.06 |
| fragment_384.2525 | : 0.04 |
| fragment_215.1775 | : 0.04 |
| fragment_161.0625 | : 0.03 |
| loss_58.0325      | : 0.03 |
| fragment_175.0575 | : 0.03 |
| loss_44.0325      | : 0.03 |
| loss_67.0325      | : 0.03 |
| fragment_239.1775 | : 0.01 |
| fragment_385.2575 | : 0.01 |
| loss_144.9275     | : 0.01 |
| fragment_367.2375 | : 0.01 |
| fragment_368.2725 | : 0.01 |
| loss_97.8975      | : 0.01 |



euphorbia\_motif\_214.m2m

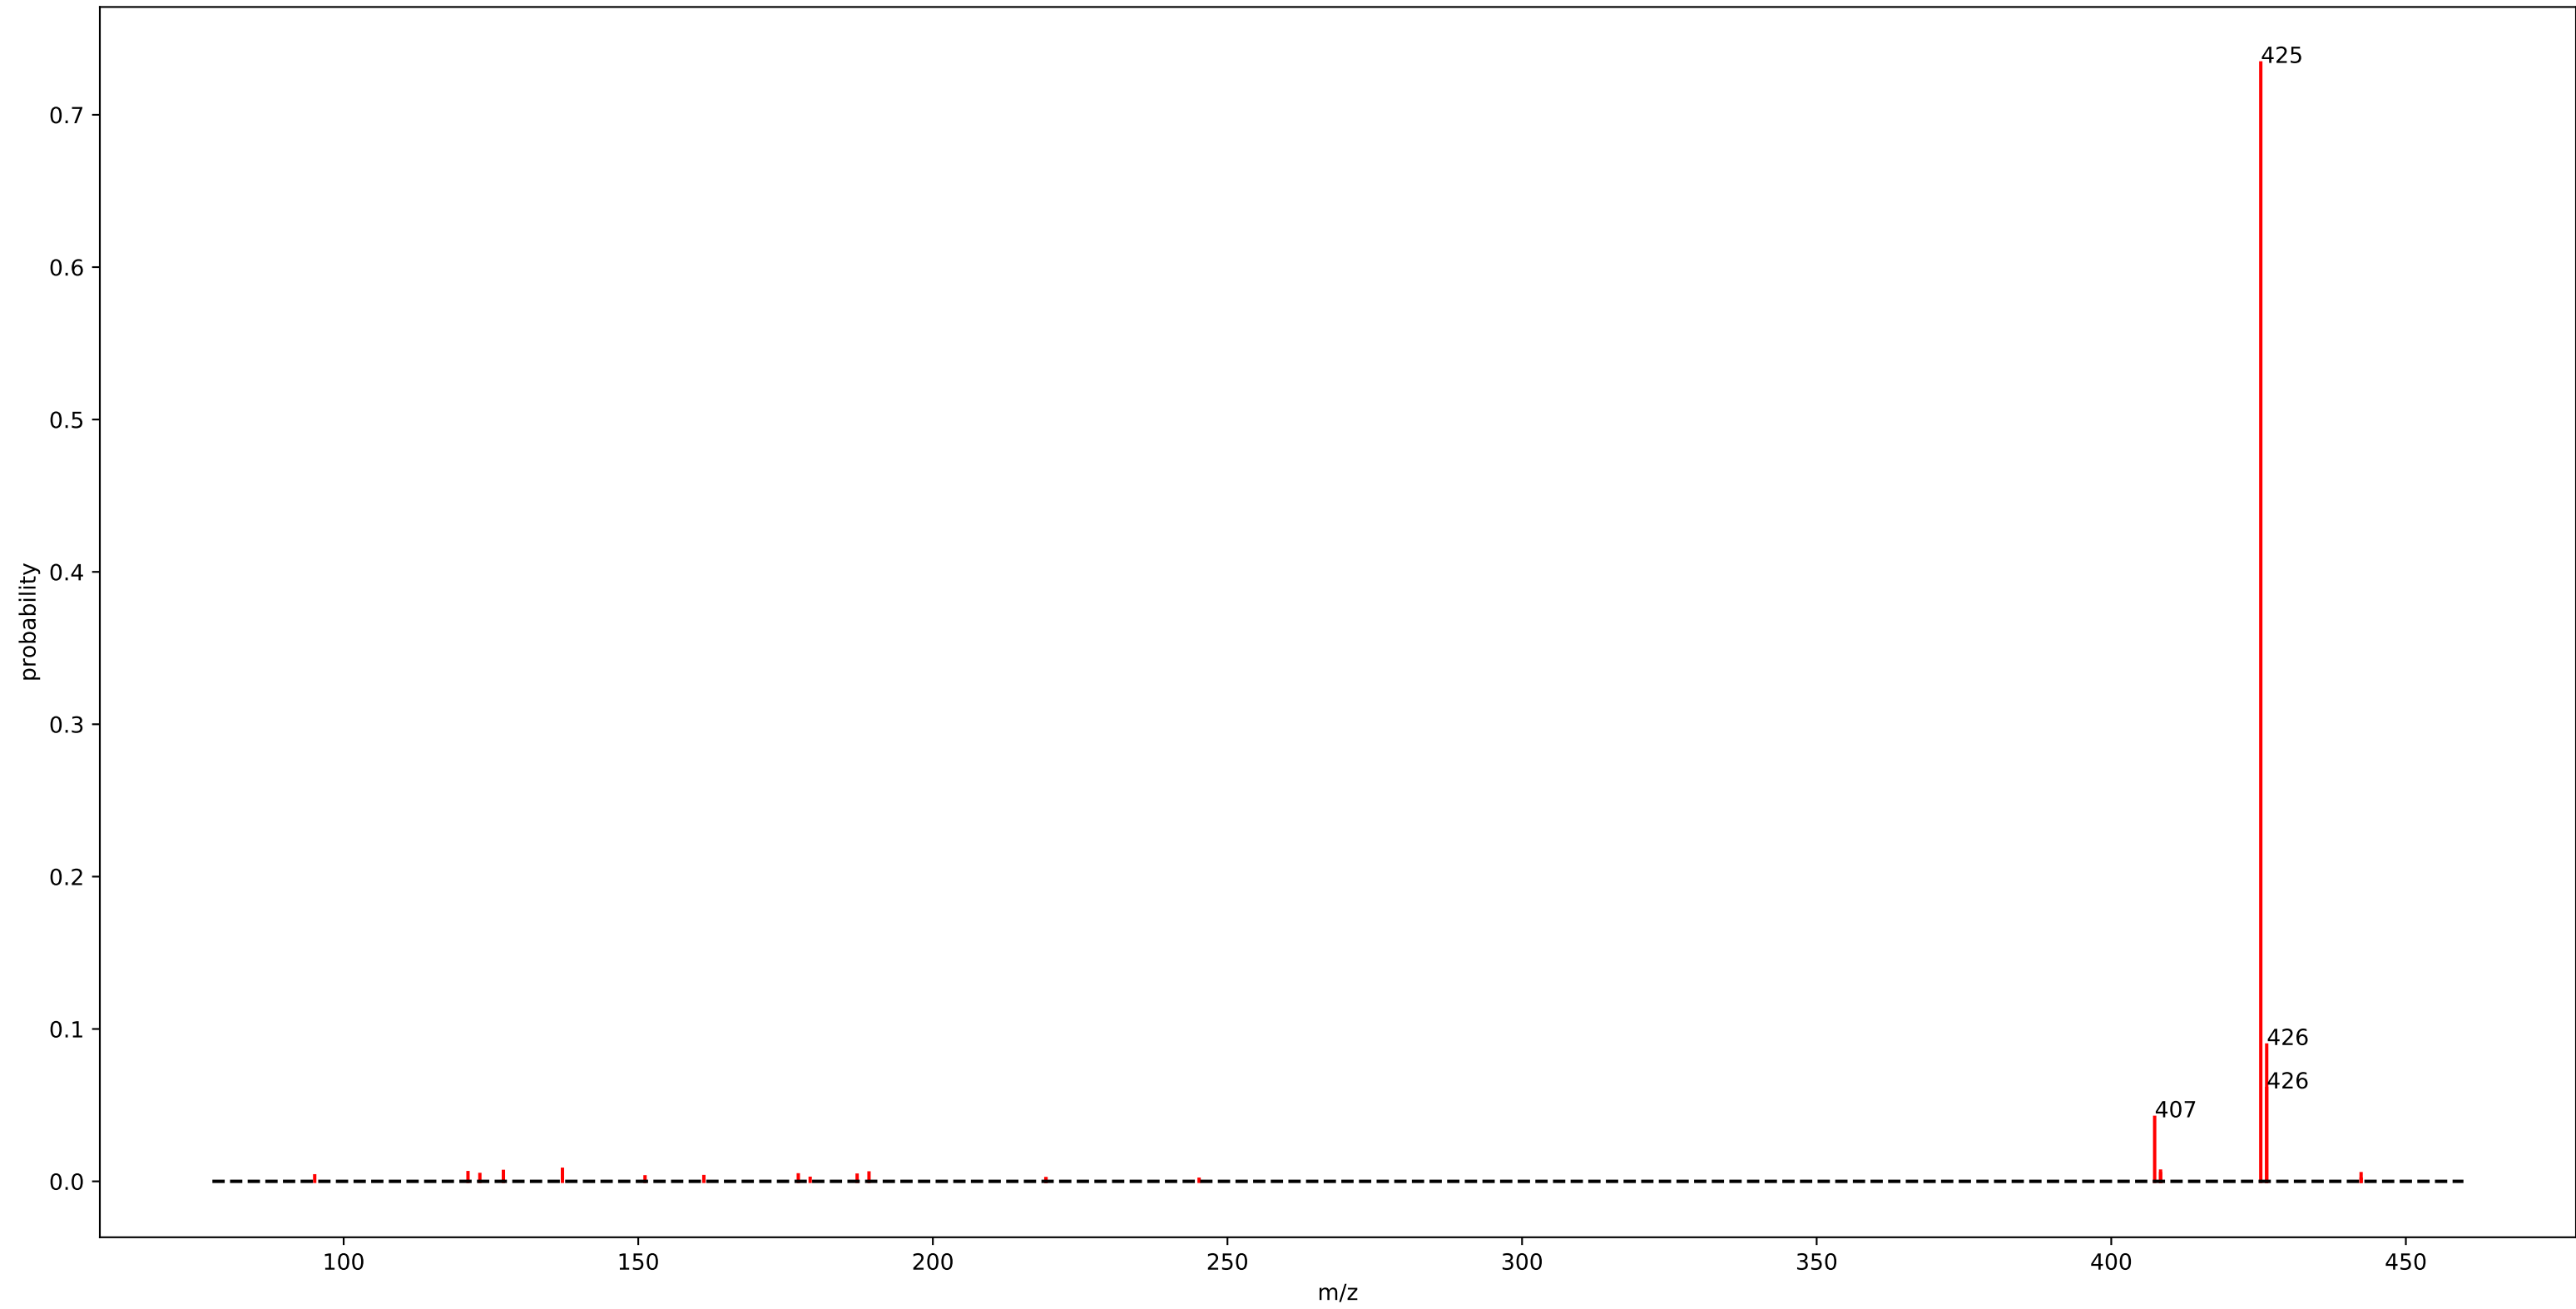

## euphorbia\_motif\_214.m2m

|                   |        |
|-------------------|--------|
| fragment_425.3775 | : 0.73 |
| fragment_426.3825 | : 0.09 |
| fragment_426.3775 | : 0.06 |
| fragment_407.3675 | : 0.04 |
| fragment_137.1325 | : 0.01 |
| fragment_408.3675 | : 0.01 |
| fragment_127.1125 | : 0.01 |
| fragment_121.1025 | : 0.01 |
| fragment_189.1625 | : 0.01 |
| fragment_408.3725 | : 0.01 |
| fragment_442.4025 | : 0.01 |

rhamn\_motif\_153.m2m

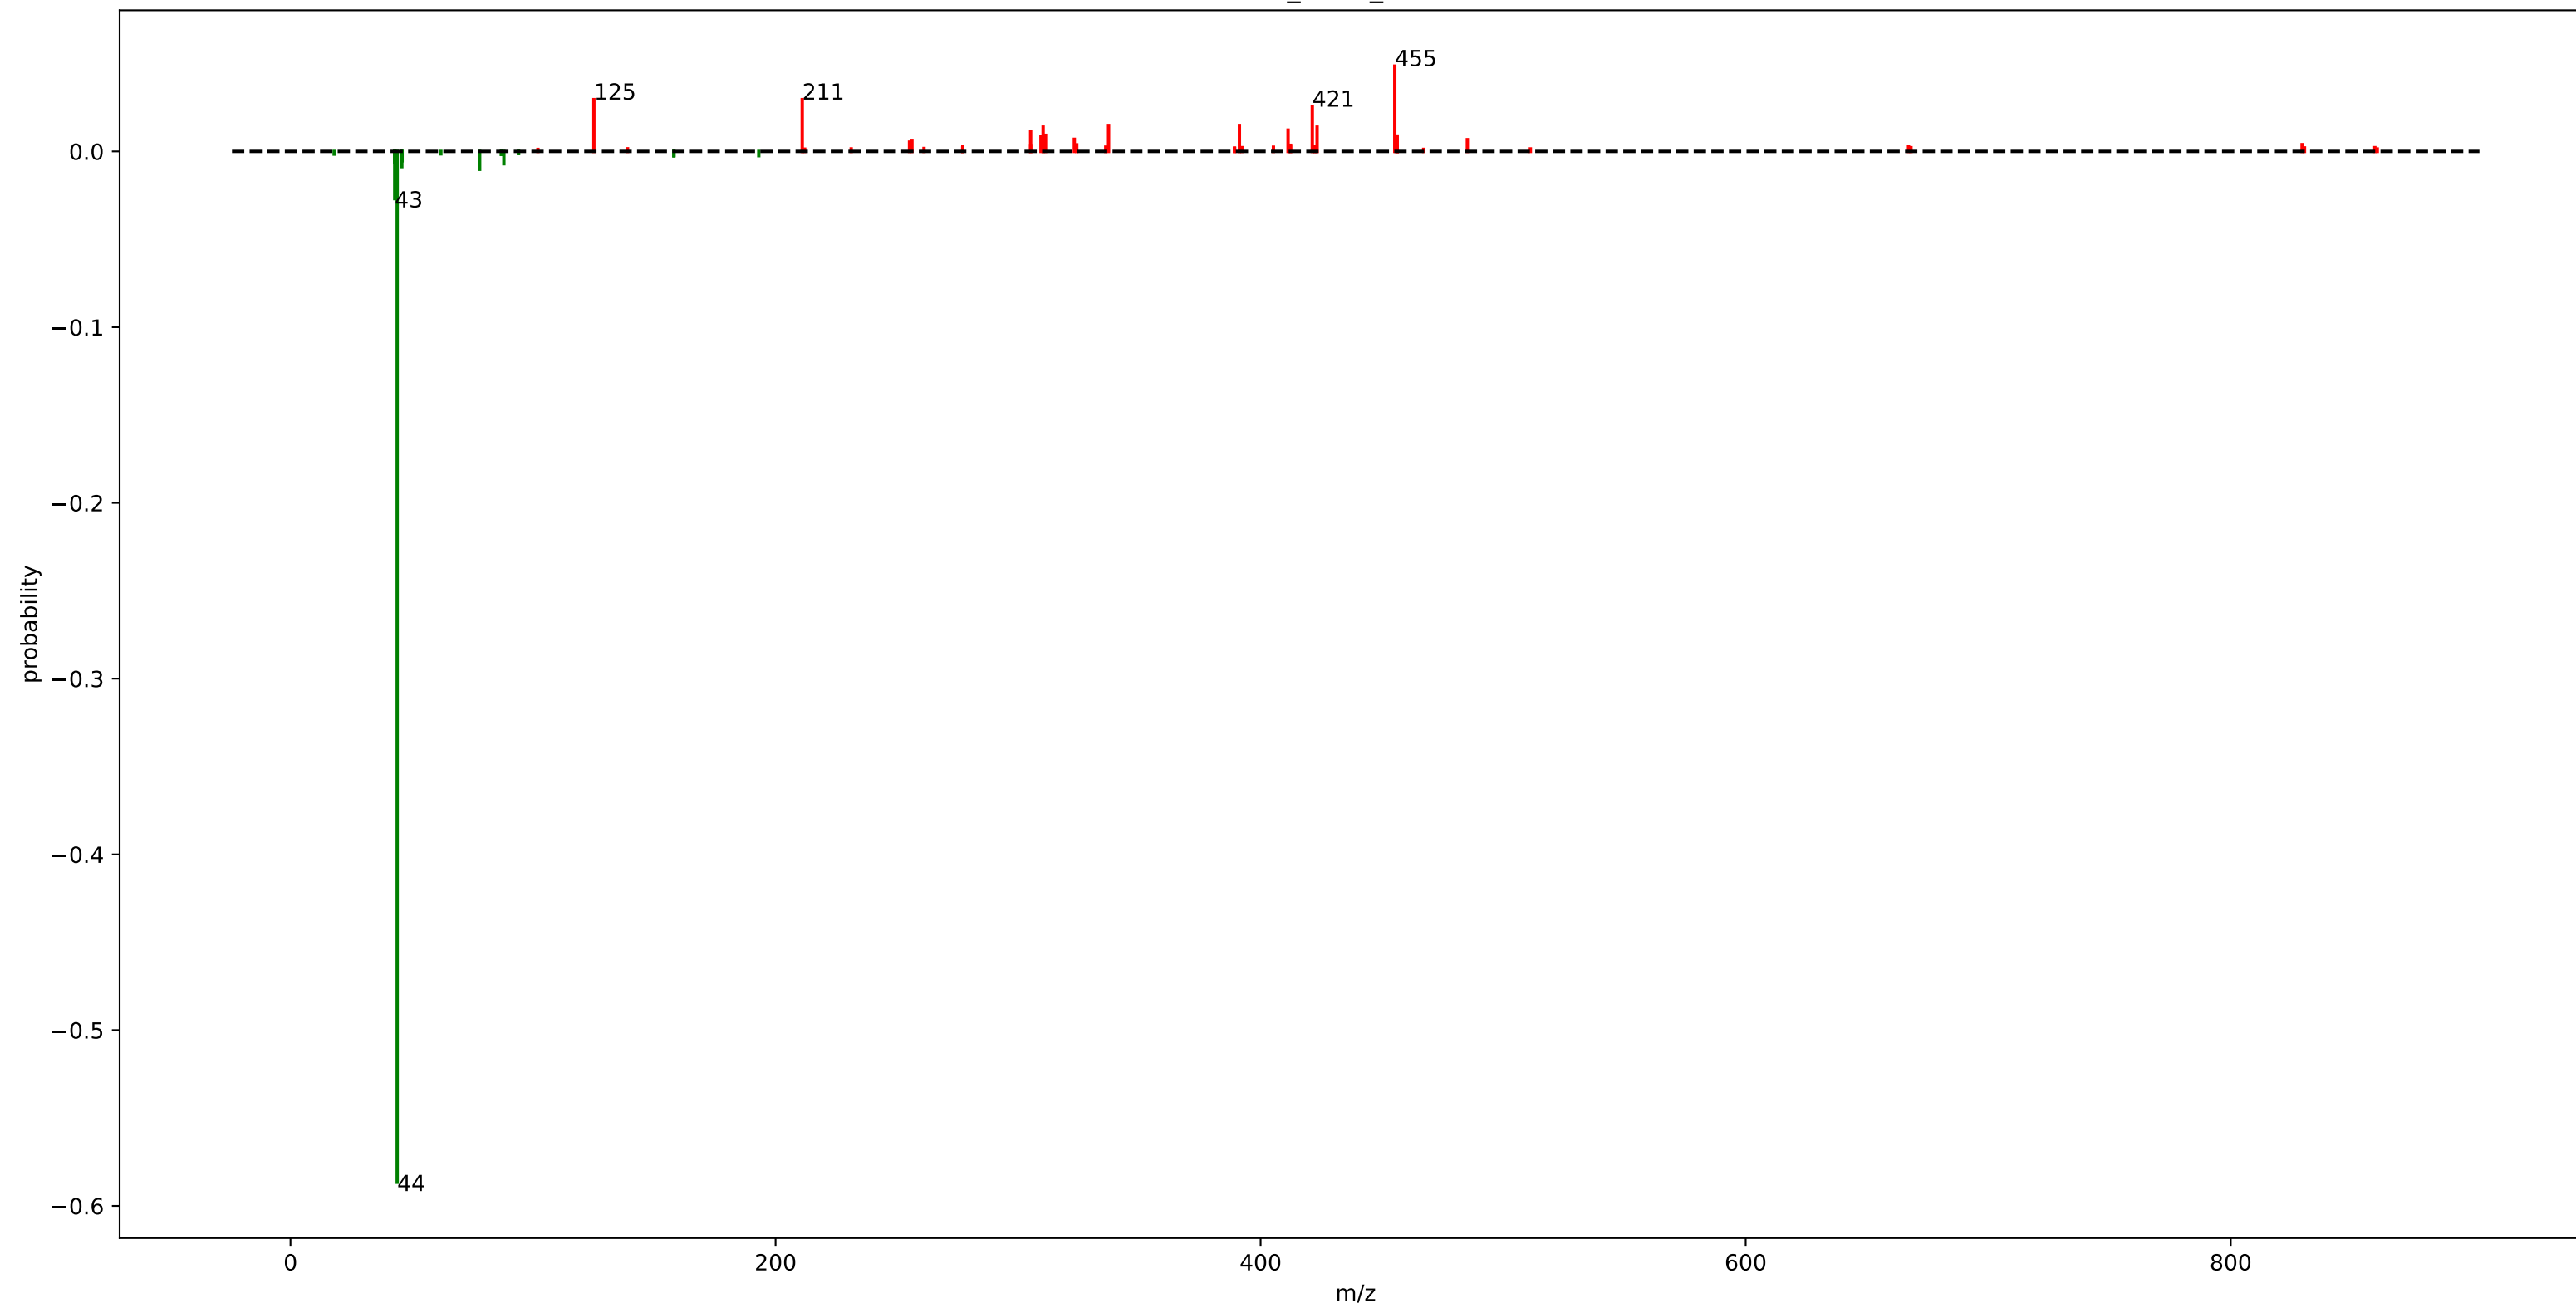

# rhamn\_motif\_153.m2m

|                   |        |                   |        |
|-------------------|--------|-------------------|--------|
| loss_43.9925      | : 0.59 | loss_42.9775      | : 0.01 |
| fragment_455.3125 | : 0.05 | fragment_256.2325 | : 0.01 |
| fragment_125.0975 | : 0.03 | loss_42.9975      | : 0.01 |
| fragment_210.9925 | : 0.03 | loss_46.0125      | : 0.01 |
| loss_42.9825      | : 0.03 | fragment_255.2225 | : 0.01 |
| fragment_421.3075 | : 0.03 |                   |        |
| fragment_391.2625 | : 0.01 |                   |        |
| fragment_337.3125 | : 0.01 |                   |        |
| fragment_310.3225 | : 0.01 |                   |        |
| fragment_423.2875 | : 0.01 |                   |        |
| fragment_411.3225 | : 0.01 |                   |        |
| fragment_305.1725 | : 0.01 |                   |        |
| loss_77.9975      | : 0.01 |                   |        |
| fragment_311.3275 | : 0.01 |                   |        |
| fragment_456.3225 | : 0.01 |                   |        |
| loss_45.9025      | : 0.01 |                   |        |
| fragment_309.4225 | : 0.01 |                   |        |
| loss_87.9825      | : 0.01 |                   |        |
| fragment_323.1875 | : 0.01 |                   |        |
| fragment_485.2325 | : 0.01 |                   |        |

rhabdus\_motif\_145.m2m

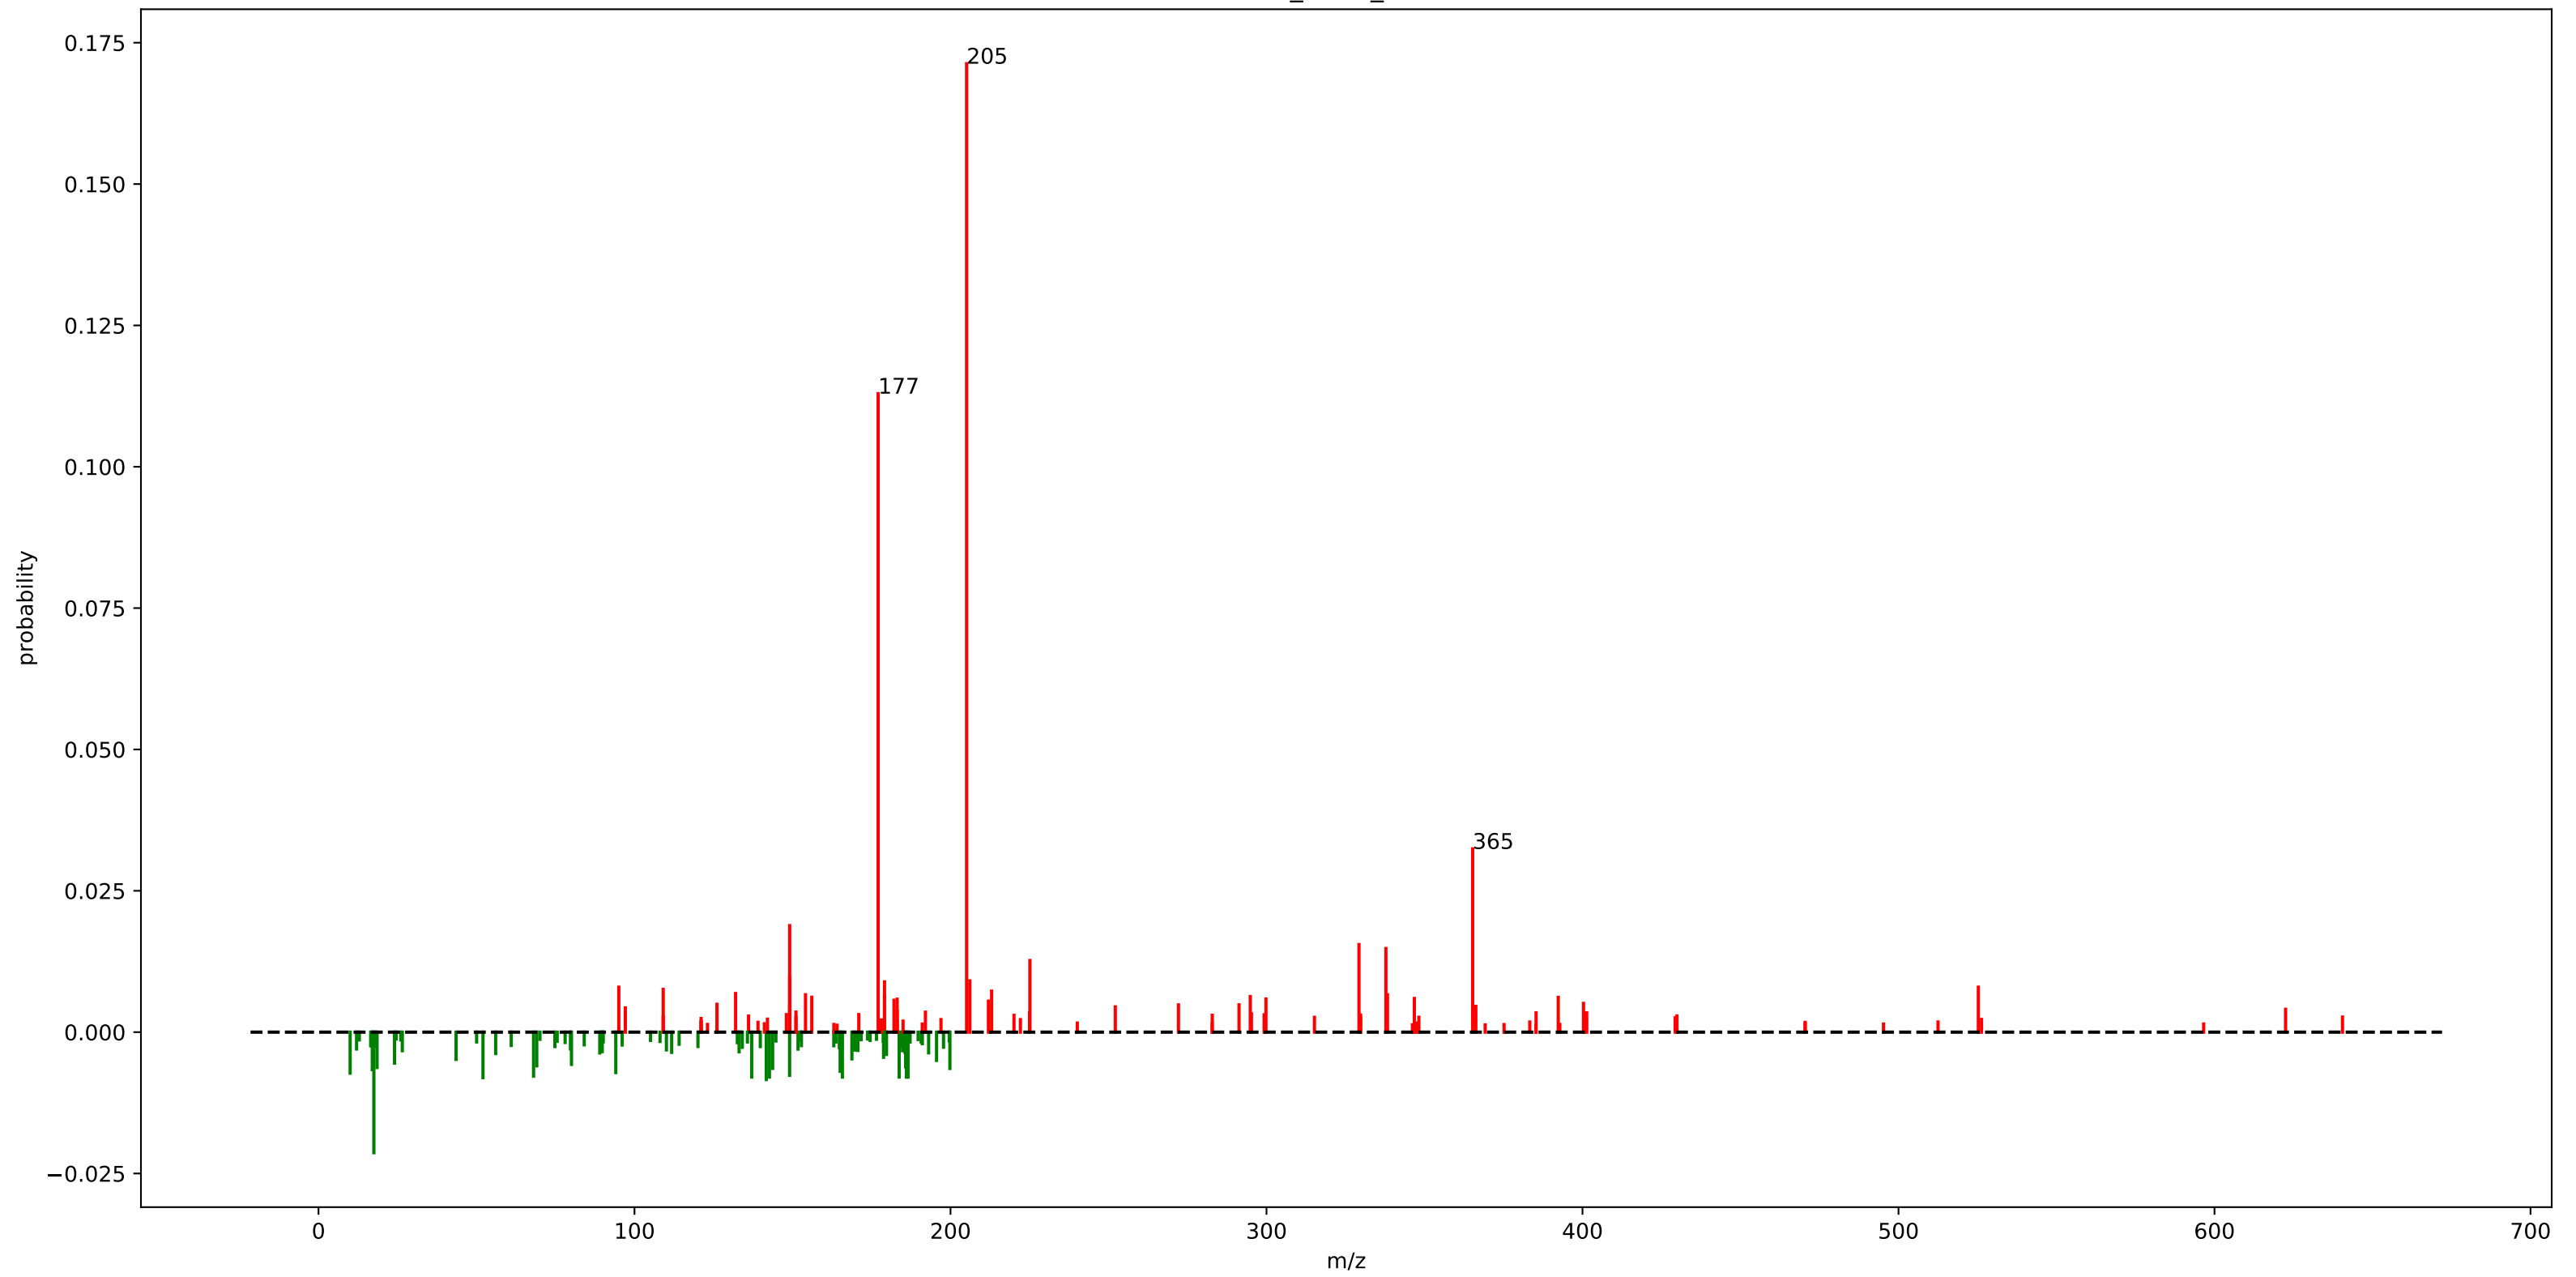

## rhabdus\_motif\_145.m2m

|                   |        |                   |        |                   |        |
|-------------------|--------|-------------------|--------|-------------------|--------|
| fragment_205.0975 | : 0.17 | loss_183.7525     | : 0.01 | loss_69.0675      | : 0.01 |
| fragment_177.1025 | : 0.11 | loss_68.0625      | : 0.01 | fragment_346.7875 | : 0.01 |
| fragment_365.2425 | : 0.03 | loss_149.0825     | : 0.01 | fragment_299.8225 | : 0.01 |
| loss_17.5175      | : 0.02 | fragment_109.0875 | : 0.01 | fragment_183.1125 | : 0.01 |
| fragment_149.1075 | : 0.02 | fragment_213.0125 | : 0.01 | loss_80.0525      | : 0.01 |
| fragment_329.2675 | : 0.02 | loss_10.0125      | : 0.01 | fragment_182.1175 | : 0.01 |
| fragment_337.7825 | : 0.01 | loss_94.0775      | : 0.01 | loss_24.0575      | : 0.01 |
| fragment_225.1225 | : 0.01 | loss_165.0825     | : 0.01 | fragment_212.0075 | : 0.01 |
| fragment_149.1025 | : 0.01 | fragment_131.9925 | : 0.01 | fragment_400.3175 | : 0.01 |
| fragment_206.1025 | : 0.01 | loss_17.0175      | : 0.01 |                   |        |
| fragment_179.1175 | : 0.01 | fragment_154.1175 | : 0.01 |                   |        |
| loss_141.6925     | : 0.01 | fragment_338.2825 | : 0.01 |                   |        |
| loss_52.0525      | : 0.01 | loss_199.8075     | : 0.01 |                   |        |
| loss_142.6975     | : 0.01 | loss_143.7175     | : 0.01 |                   |        |
| fragment_525.2675 | : 0.01 | fragment_294.8625 | : 0.01 |                   |        |
| fragment_95.0325  | : 0.01 | loss_18.5275      | : 0.01 |                   |        |
| loss_186.0475     | : 0.01 | fragment_179.1125 | : 0.01 |                   |        |
| loss_165.7875     | : 0.01 | fragment_156.1025 | : 0.01 |                   |        |
| loss_186.5625     | : 0.01 | fragment_392.3225 | : 0.01 |                   |        |
| loss_137.0875     | : 0.01 | loss_185.8025     | : 0.01 |                   |        |

StrepSalini\_motif\_125.m2m

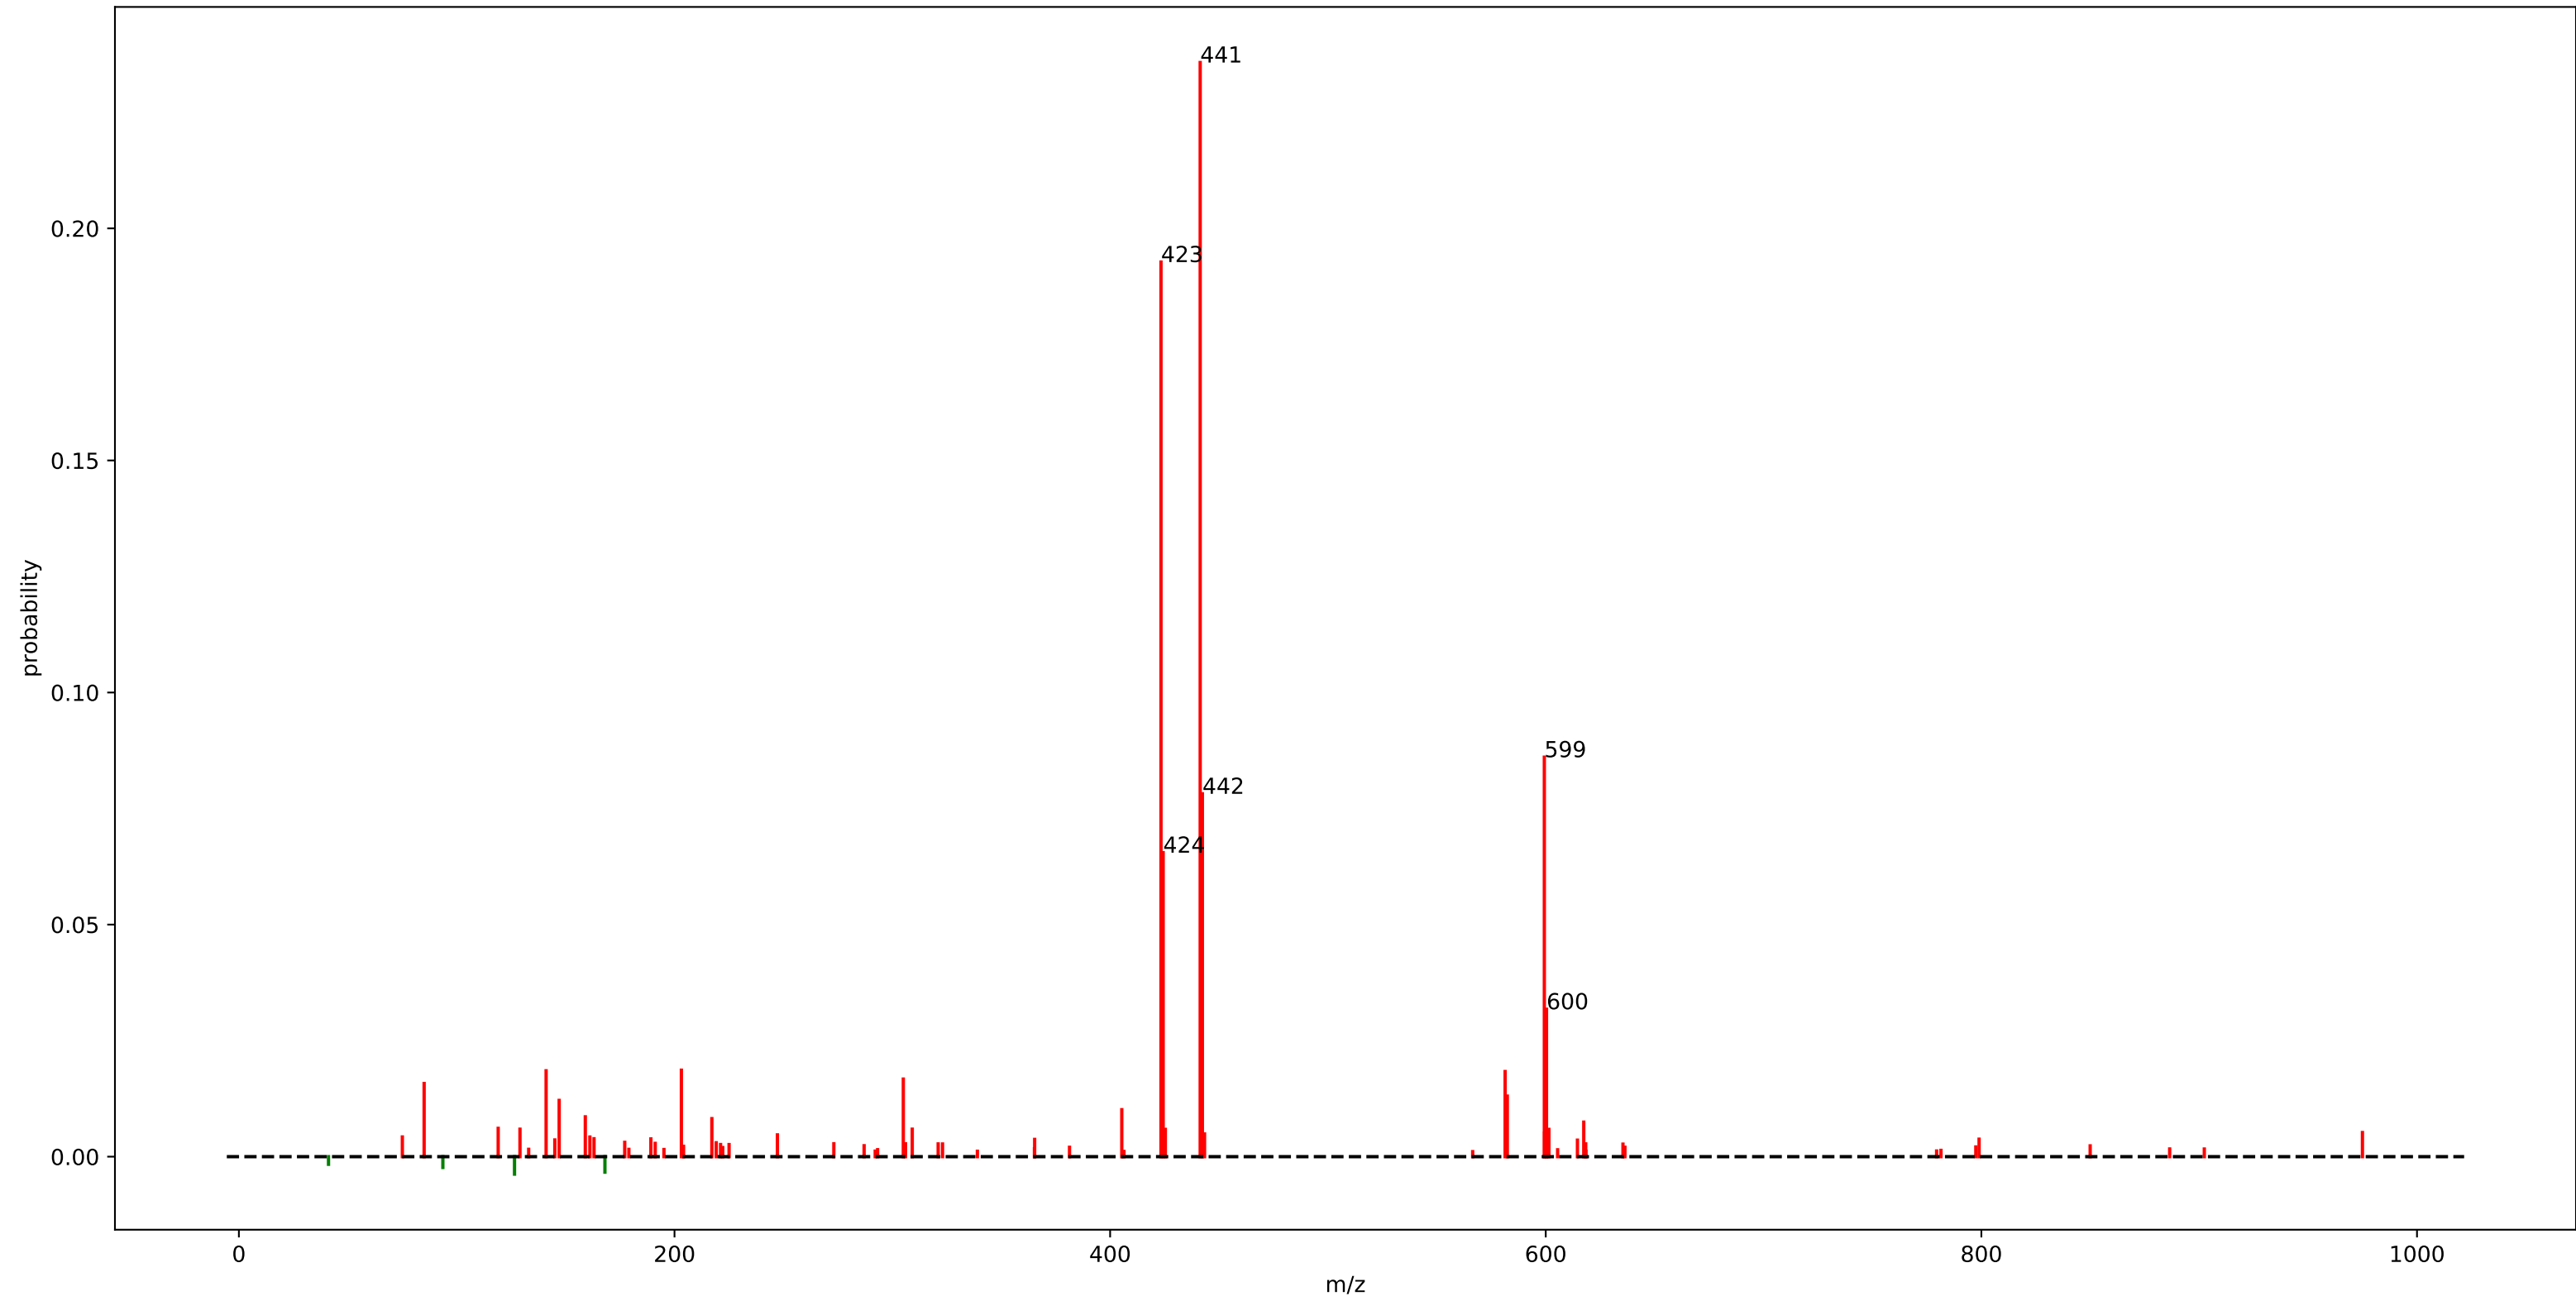

## StrepSalini\_motif\_125.m2m

|                   |        |                   |        |
|-------------------|--------|-------------------|--------|
| fragment_441.3500 | : 0.24 | fragment_425.3500 | : 0.01 |
| fragment_423.3525 | : 0.19 | fragment_601.4500 | : 0.01 |
| fragment_599.3500 | : 0.09 | fragment_974.9500 | : 0.01 |
| fragment_442.3525 | : 0.08 | fragment_599.4500 | : 0.01 |
| fragment_424.3500 | : 0.07 |                   |        |
| fragment_600.3500 | : 0.03 |                   |        |
| fragment_203.1500 | : 0.02 |                   |        |
| fragment_141.0500 | : 0.02 |                   |        |
| fragment_581.3500 | : 0.02 |                   |        |
| fragment_305.0500 | : 0.02 |                   |        |
| fragment_85.0500  | : 0.02 |                   |        |
| fragment_582.3500 | : 0.01 |                   |        |
| fragment_147.0500 | : 0.01 |                   |        |
| fragment_405.3525 | : 0.01 |                   |        |
| fragment_159.0500 | : 0.01 |                   |        |
| fragment_217.1525 | : 0.01 |                   |        |
| fragment_617.4500 | : 0.01 |                   |        |
| fragment_119.0500 | : 0.01 |                   |        |
| fragment_309.1500 | : 0.01 |                   |        |
| fragment_129.0525 | : 0.01 |                   |        |



motif\_610

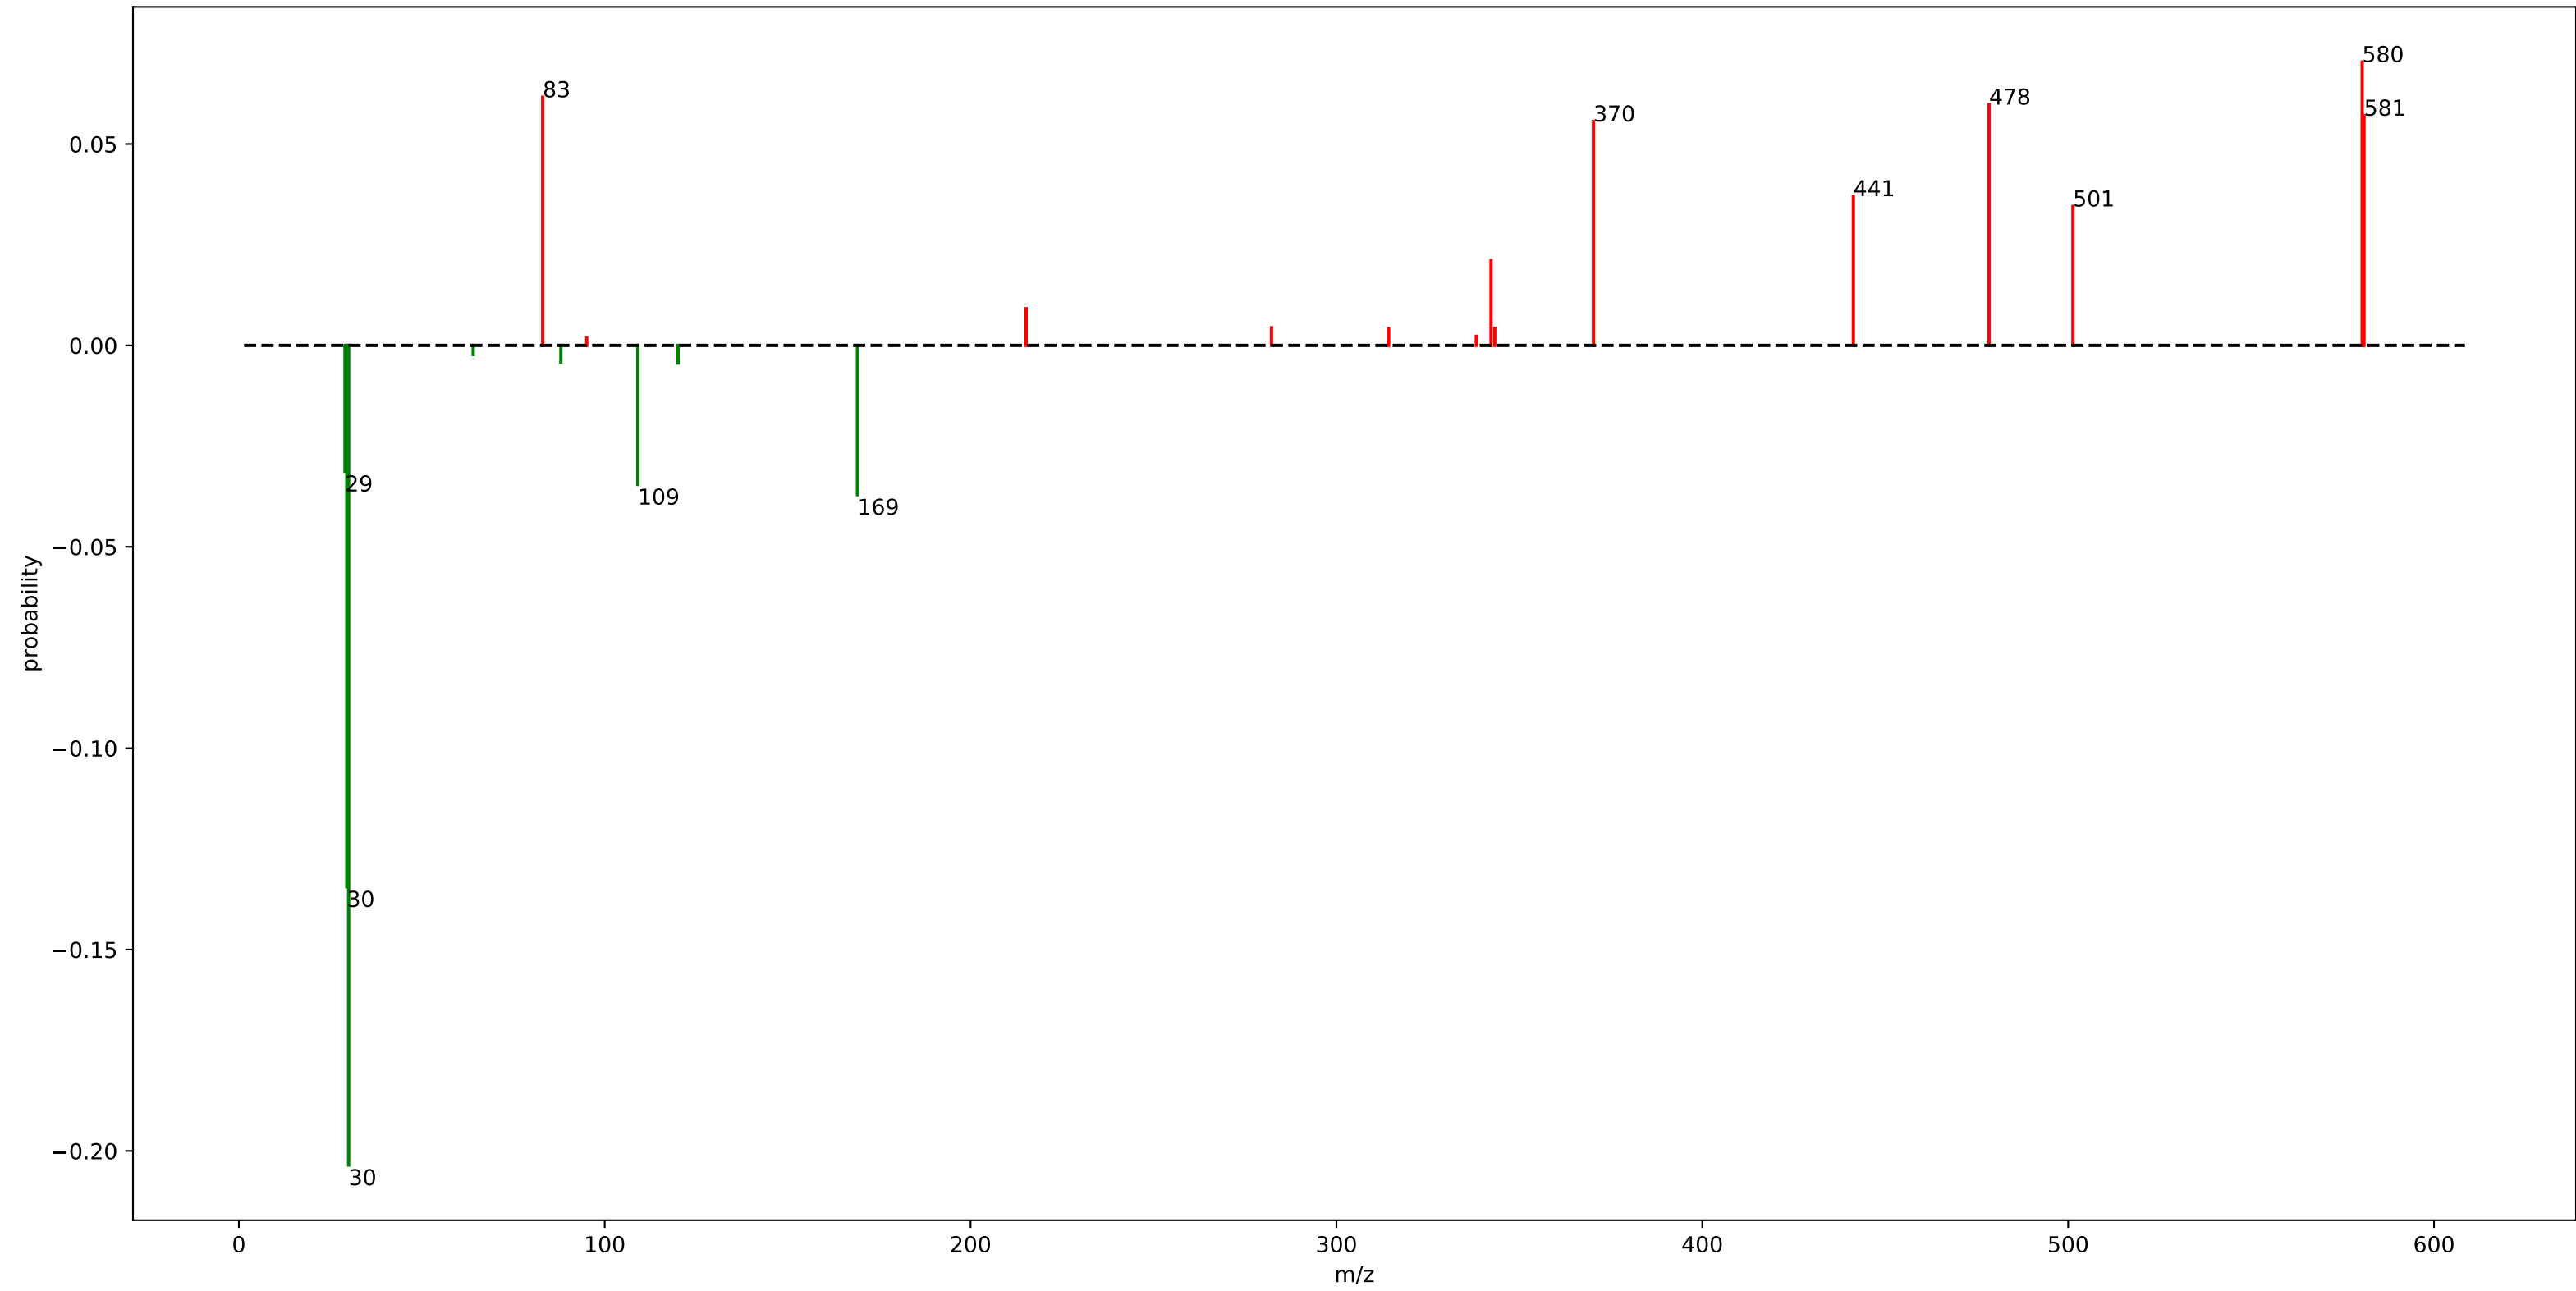

## motif\_610

|                   |        |
|-------------------|--------|
| loss_30.0075      | : 0.20 |
| loss_29.5075      | : 0.13 |
| fragment_580.3625 | : 0.07 |
| fragment_83.0475  | : 0.06 |
| fragment_478.3675 | : 0.06 |
| fragment_580.8625 | : 0.06 |
| fragment_370.2575 | : 0.06 |
| loss_169.0825     | : 0.04 |
| fragment_441.2875 | : 0.04 |
| loss_109.0625     | : 0.03 |
| fragment_501.3075 | : 0.03 |
| loss_29.0075      | : 0.03 |
| fragment_342.2625 | : 0.02 |
| fragment_215.1775 | : 0.01 |

motif\_612

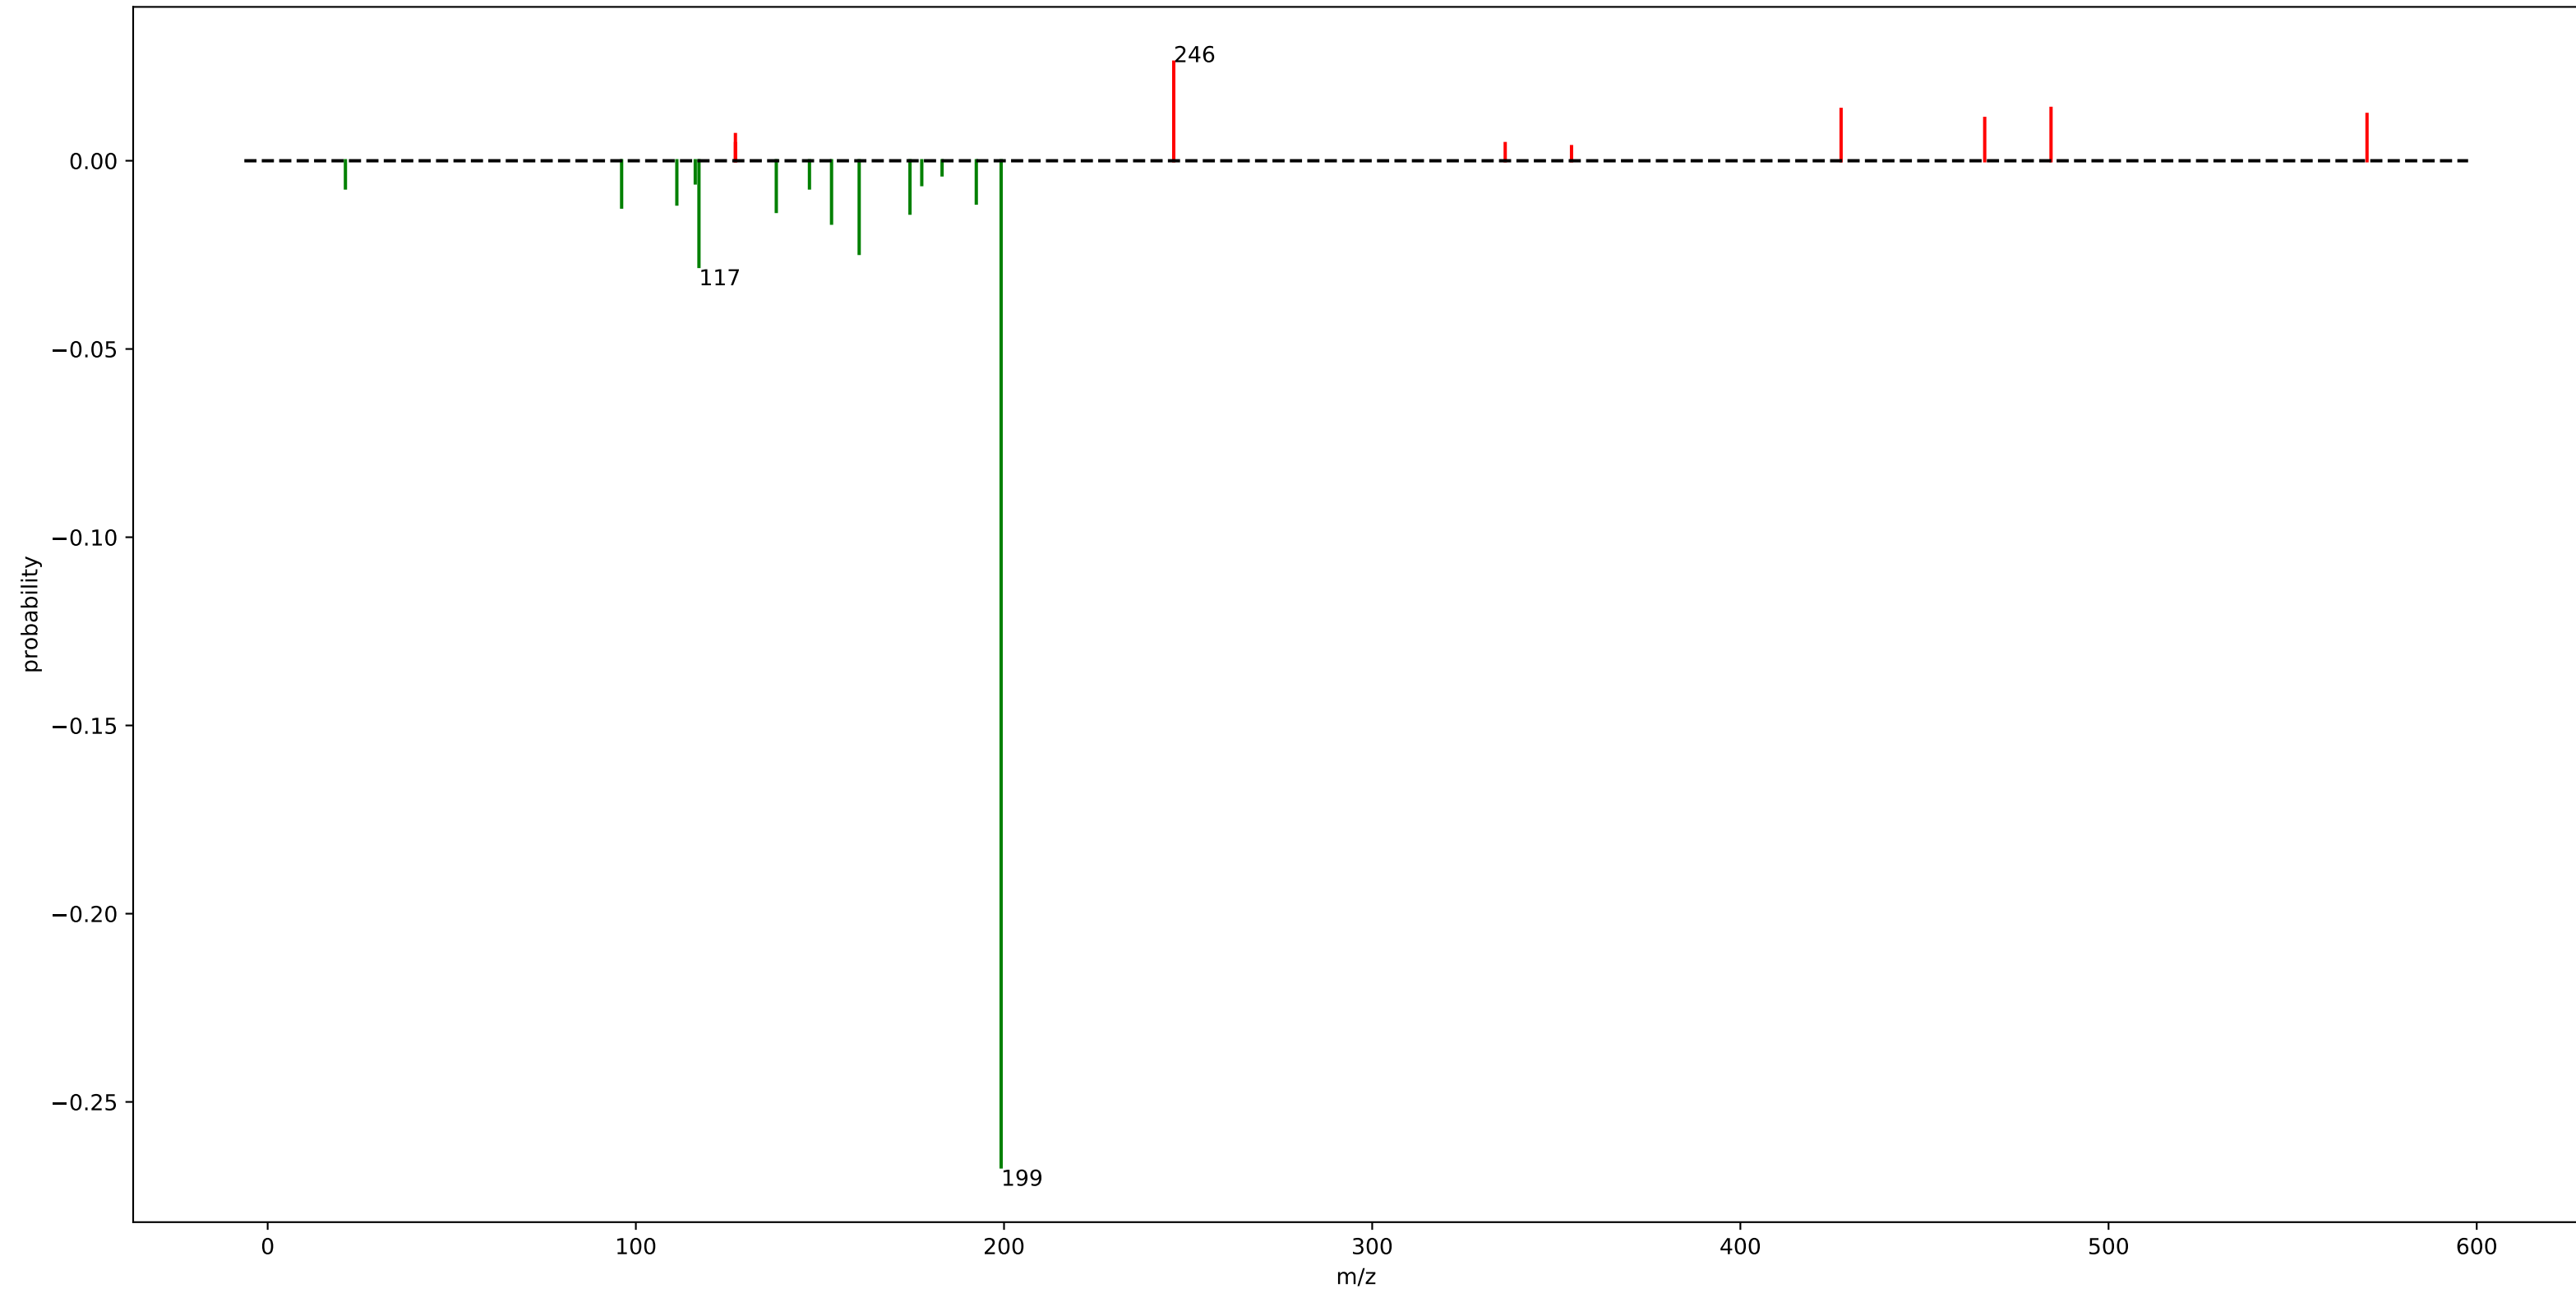

## motif\_612

|                   |        |
|-------------------|--------|
| loss_199.2175     | : 0.27 |
| loss_117.1425     | : 0.03 |
| fragment_246.0975 | : 0.03 |
| loss_160.6575     | : 0.02 |
| loss_153.1525     | : 0.02 |
| loss_174.4575     | : 0.01 |
| fragment_484.3775 | : 0.01 |
| fragment_427.3575 | : 0.01 |
| loss_138.1475     | : 0.01 |
| loss_96.1375      | : 0.01 |
| fragment_570.2025 | : 0.01 |
| loss_111.1375     | : 0.01 |
| loss_192.4675     | : 0.01 |
| fragment_466.3675 | : 0.01 |
| loss_21.1175      | : 0.01 |
| loss_147.1525     | : 0.01 |
| fragment_127.0425 | : 0.01 |
| loss_177.6575     | : 0.01 |
| loss_116.1375     | : 0.01 |

motif\_681

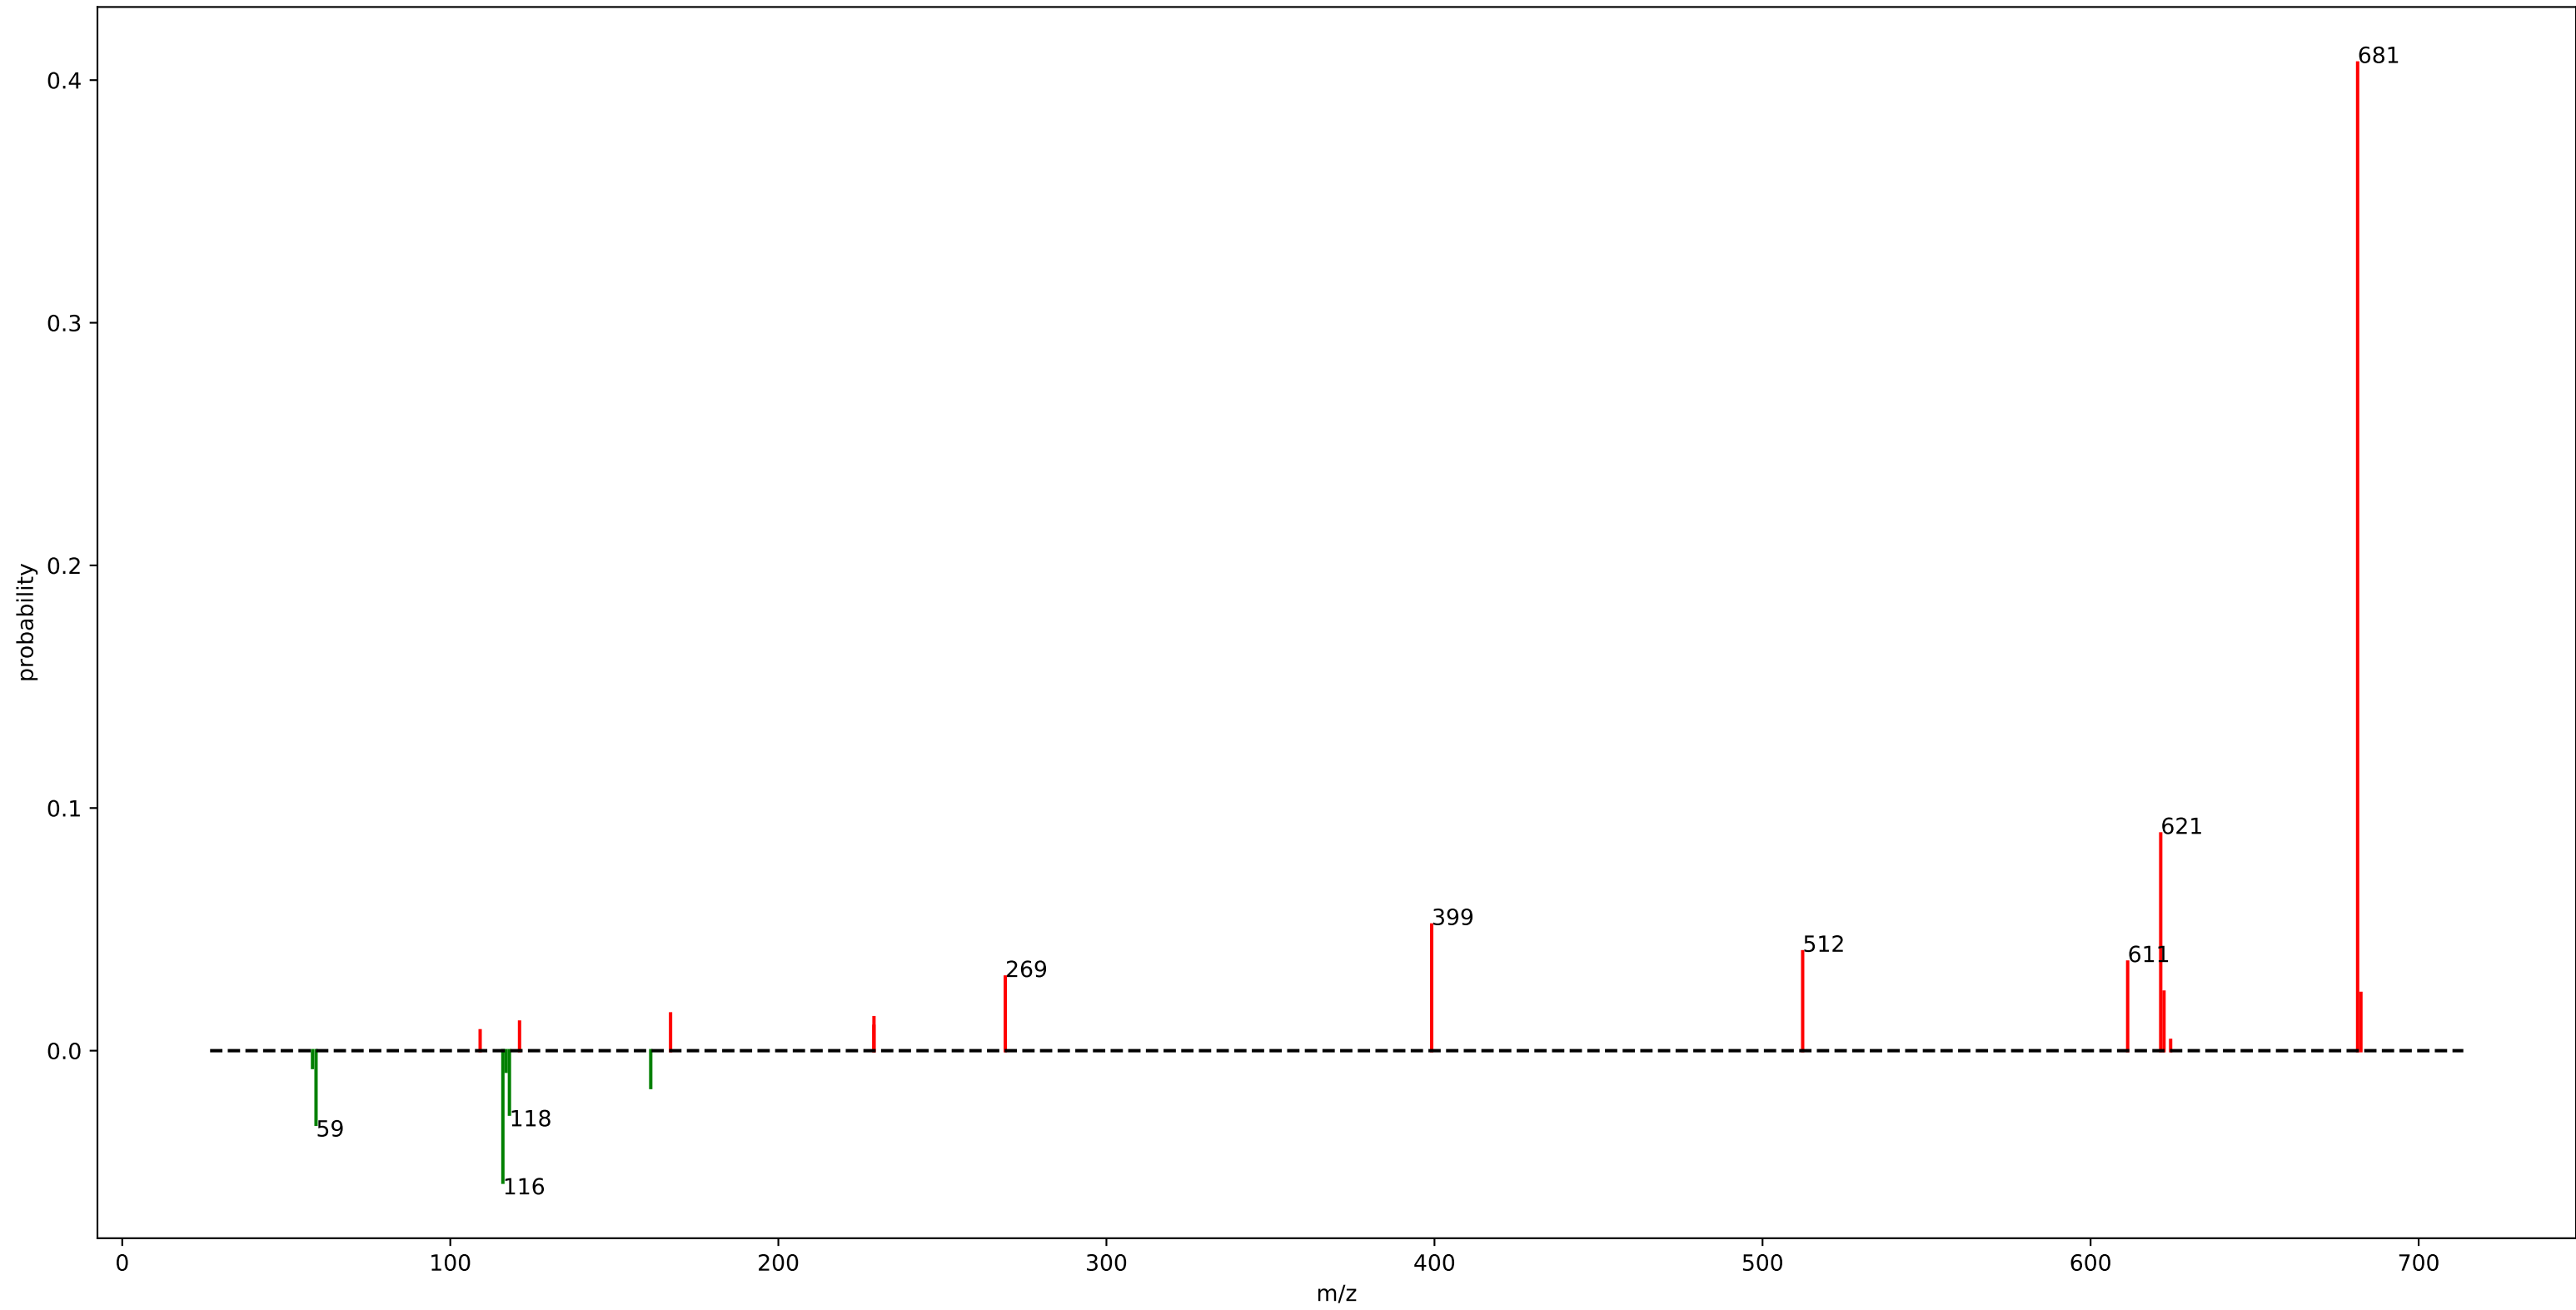

## motif\_681

|                   |        |
|-------------------|--------|
| fragment_681.3975 | : 0.41 |
| fragment_621.3775 | : 0.09 |
| loss_116.0275     | : 0.05 |
| fragment_399.1525 | : 0.05 |
| fragment_512.2375 | : 0.04 |
| fragment_611.3025 | : 0.04 |
| loss_59.0725      | : 0.03 |
| fragment_269.1725 | : 0.03 |
| loss_118.0225     | : 0.03 |
| fragment_622.3825 | : 0.02 |
| fragment_682.4025 | : 0.02 |
| loss_161.1025     | : 0.02 |
| fragment_167.1425 | : 0.02 |
| fragment_229.1475 | : 0.01 |
| fragment_121.1025 | : 0.01 |
| fragment_229.1225 | : 0.01 |
| loss_117.0175     | : 0.01 |
| fragment_109.0975 | : 0.01 |
| loss_58.0025      | : 0.01 |

motif\_613

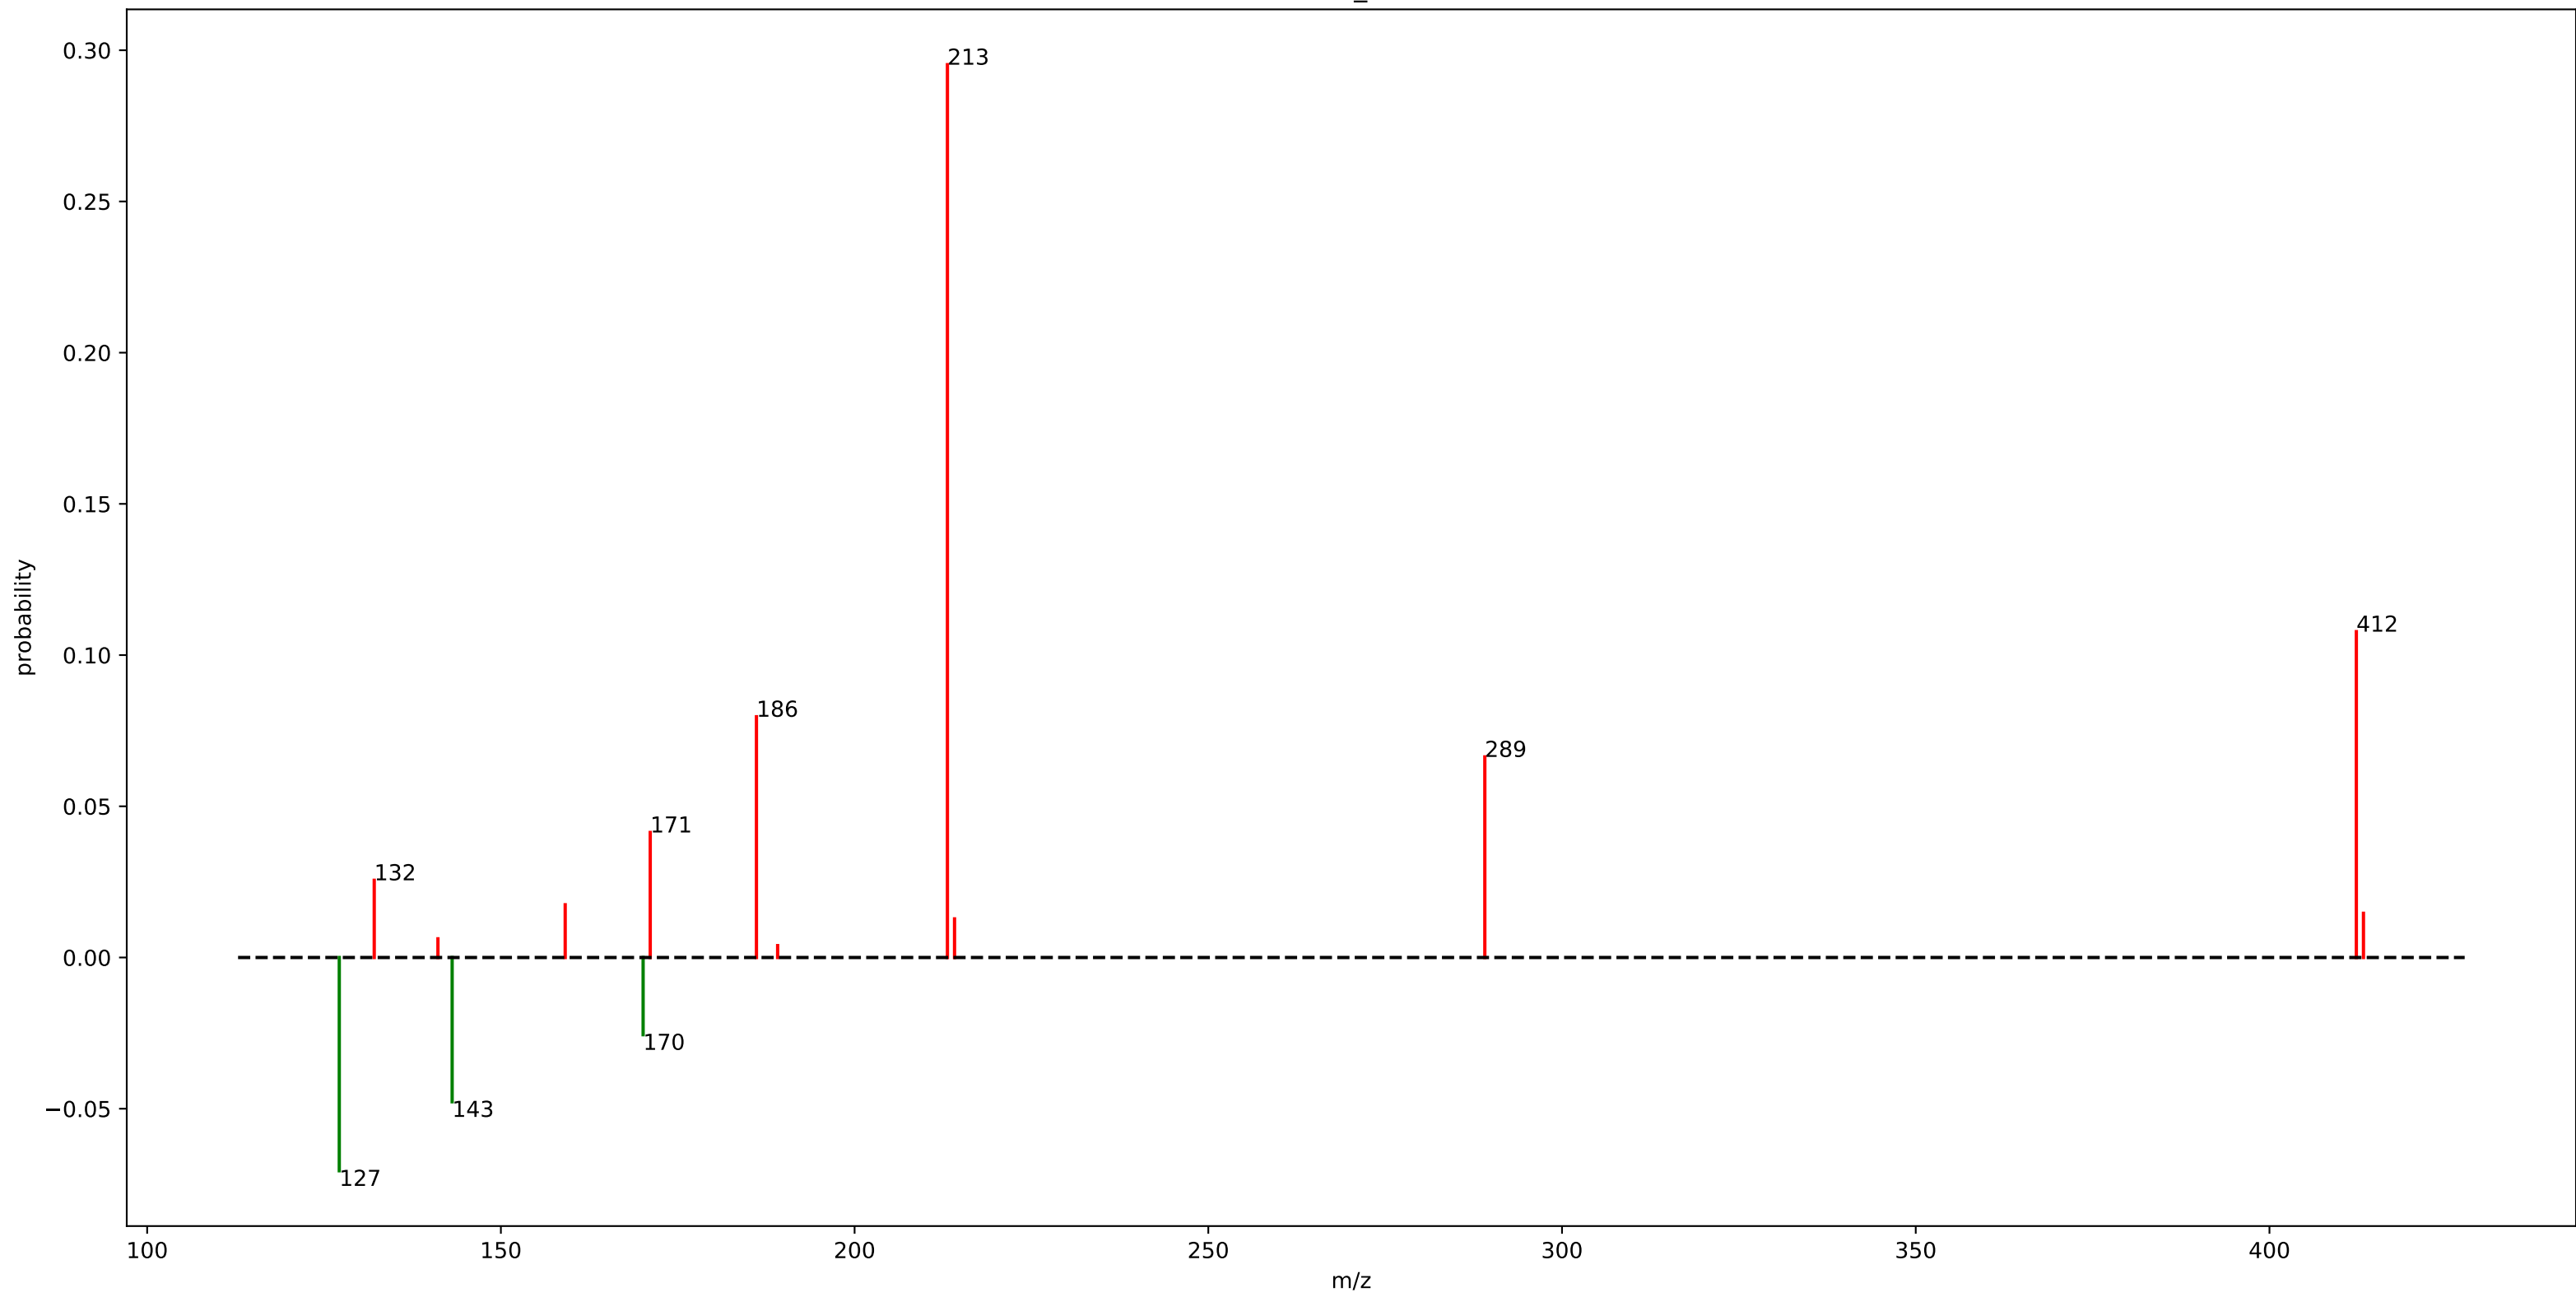

## motif\_613

|                   |        |
|-------------------|--------|
| fragment_213.1225 | : 0.30 |
| fragment_412.2825 | : 0.11 |
| fragment_186.1275 | : 0.08 |
| loss_127.1575     | : 0.07 |
| fragment_289.0875 | : 0.07 |
| loss_143.1125     | : 0.05 |
| fragment_171.1125 | : 0.04 |
| loss_170.1075     | : 0.03 |
| fragment_132.0975 | : 0.03 |
| fragment_159.0925 | : 0.02 |
| fragment_413.2875 | : 0.01 |
| fragment_214.1275 | : 0.01 |
| fragment_141.1025 | : 0.01 |



motif\_566

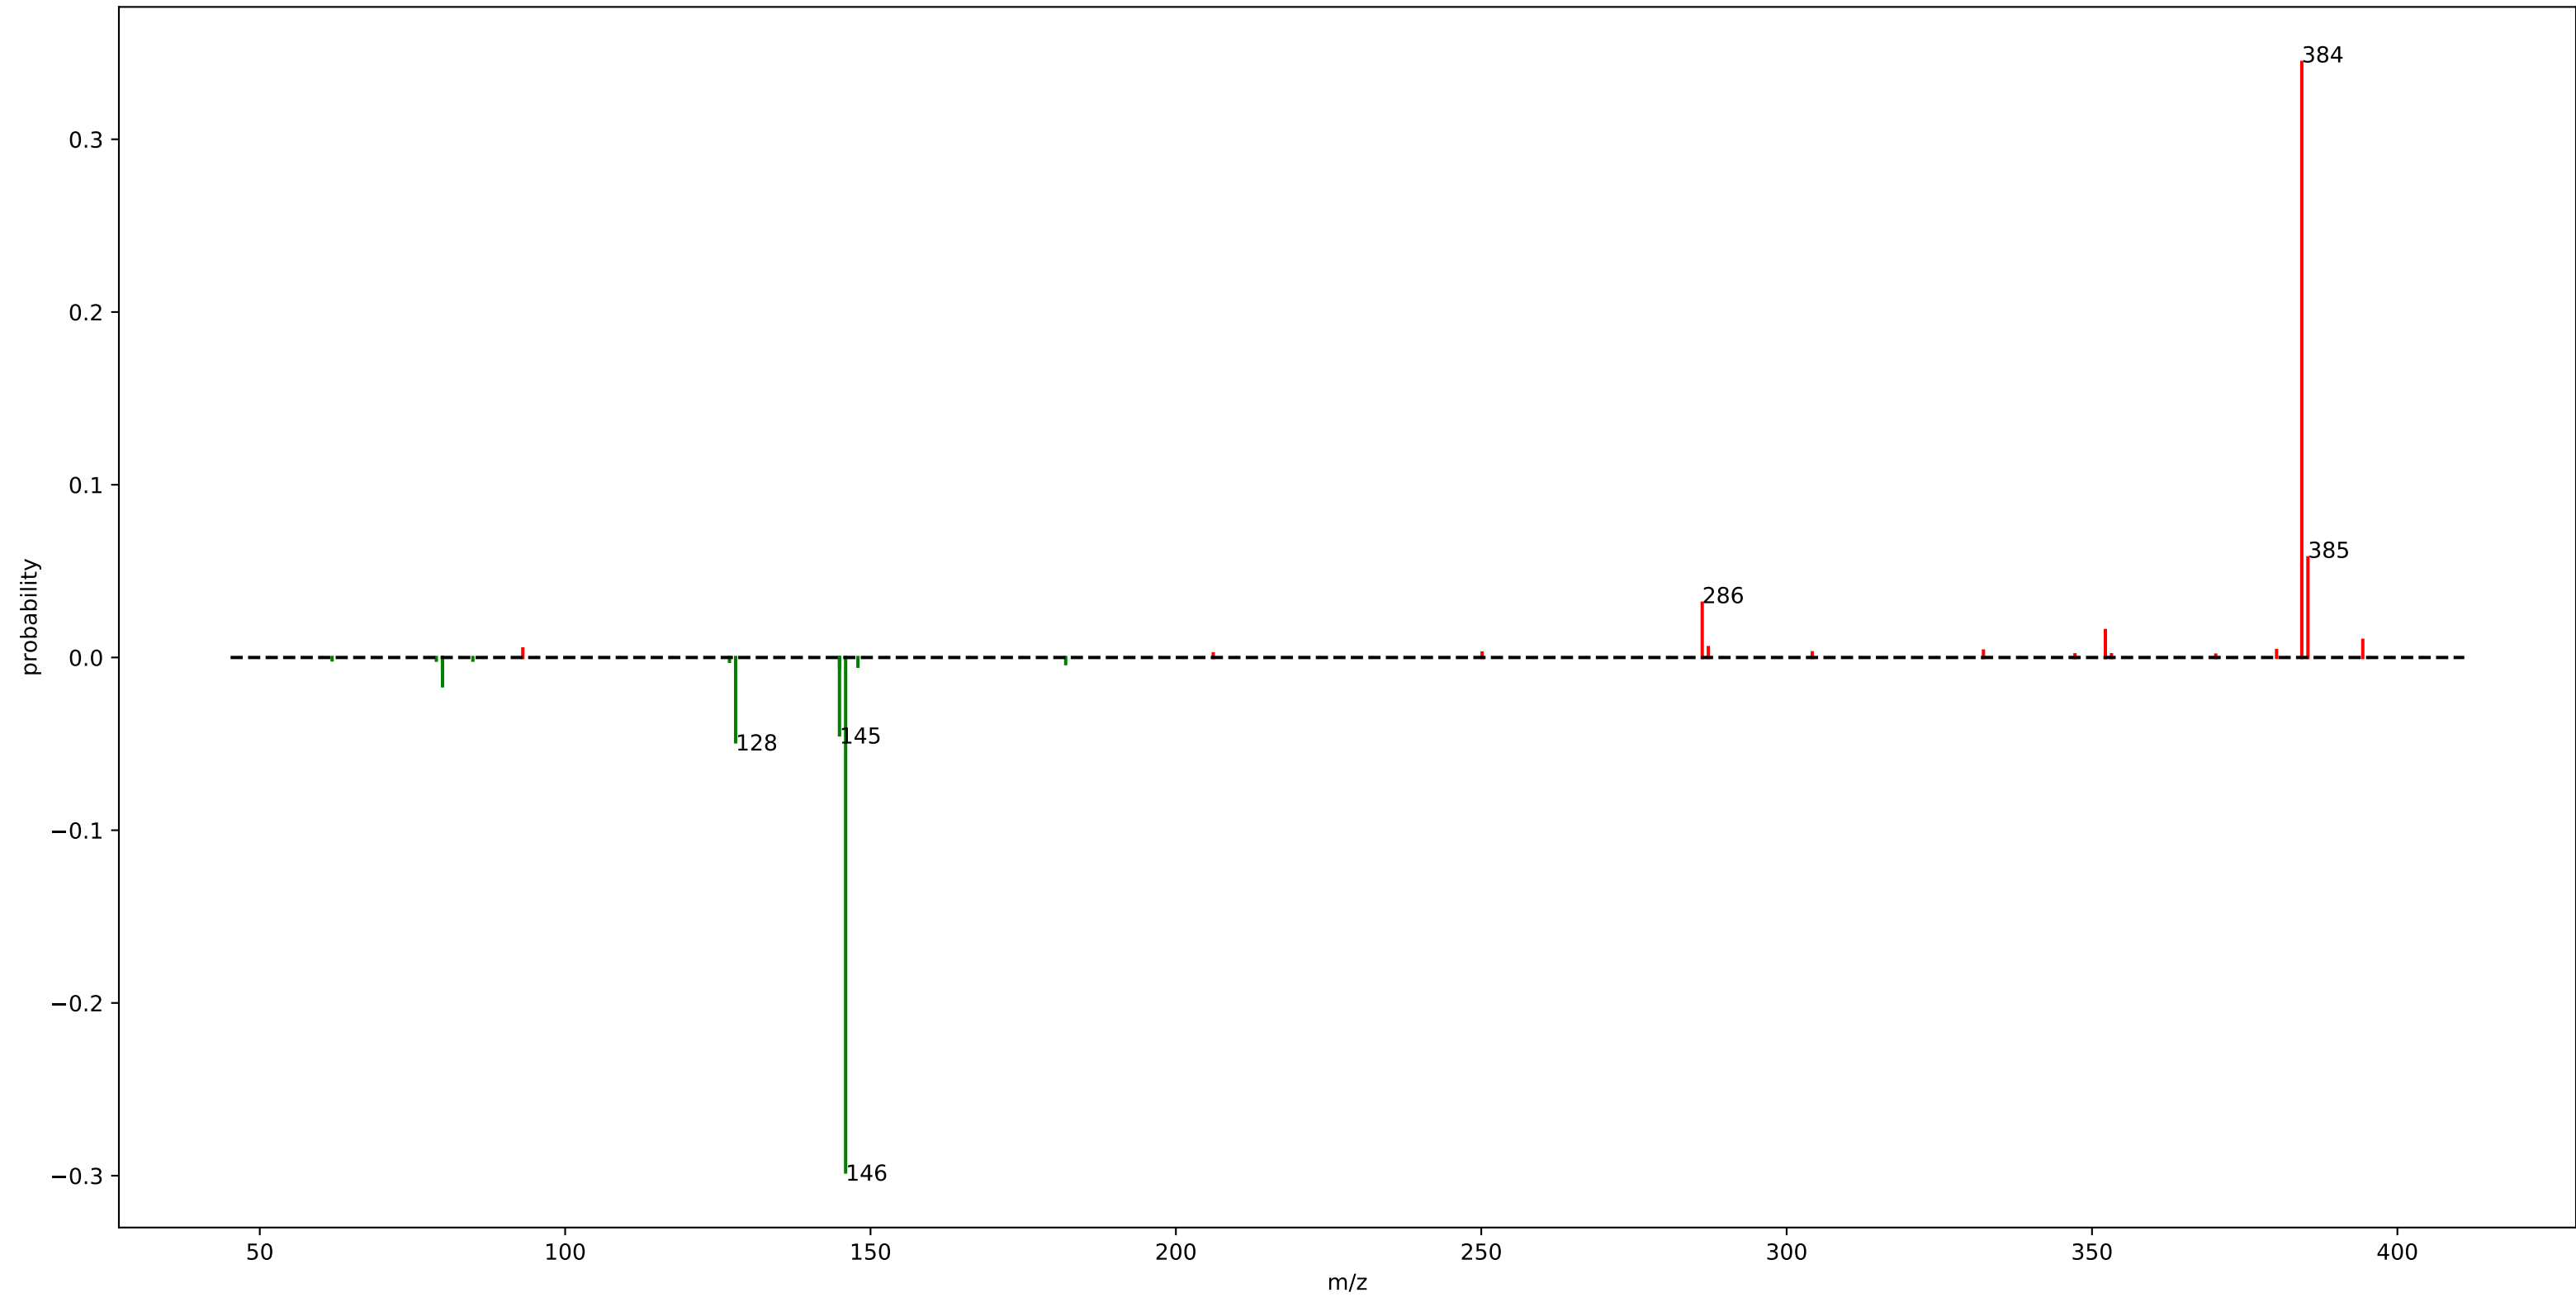

## motif\_566

|                   |        |
|-------------------|--------|
| fragment_384.3475 | : 0.34 |
| loss_145.9225     | : 0.30 |
| fragment_385.3525 | : 0.06 |
| loss_127.9125     | : 0.05 |
| loss_144.9175     | : 0.04 |
| fragment_286.1775 | : 0.03 |
| loss_79.9175      | : 0.02 |
| fragment_352.1875 | : 0.02 |
| fragment_394.3325 | : 0.01 |
| loss_79.9125      | : 0.01 |
| fragment_287.1775 | : 0.01 |
| loss_144.9225     | : 0.01 |
| loss_147.9375     | : 0.01 |

motif\_567

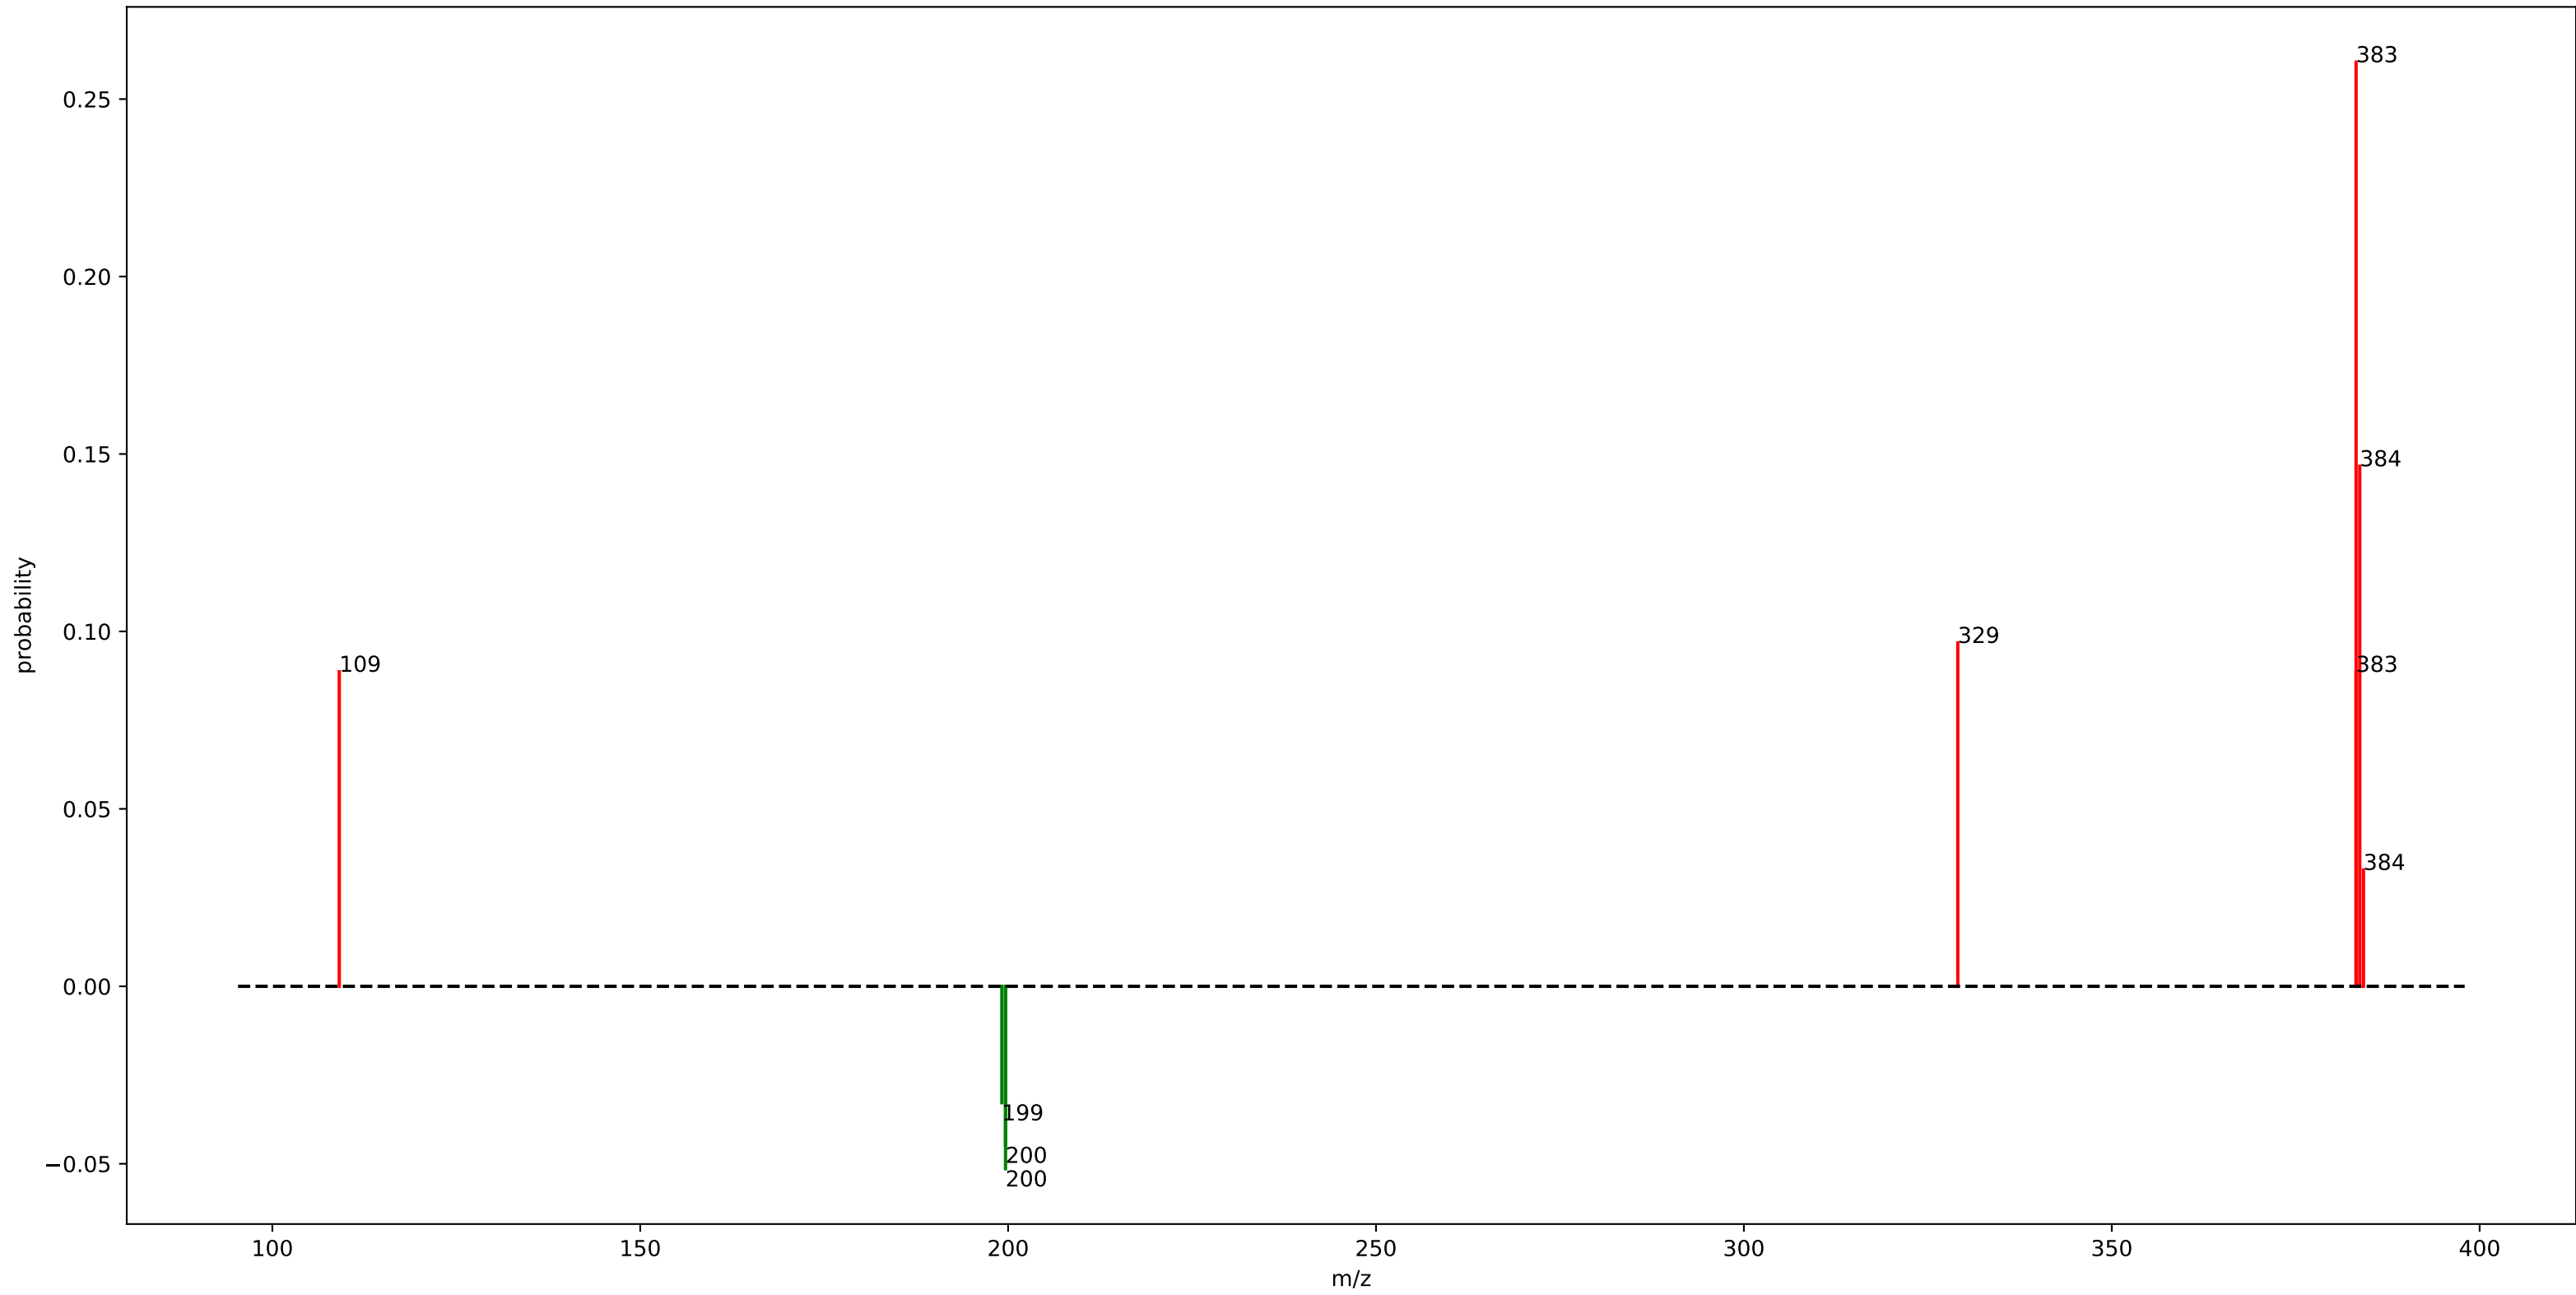

## motif\_567

|                   |        |
|-------------------|--------|
| fragment_383.2075 | : 0.26 |
| fragment_383.7075 | : 0.15 |
| fragment_329.0725 | : 0.10 |
| fragment_109.0975 | : 0.09 |
| fragment_383.2025 | : 0.09 |
| loss_199.6475     | : 0.05 |
| loss_199.6425     | : 0.04 |
| loss_199.1475     | : 0.03 |
| fragment_384.2075 | : 0.03 |

rhabdus\_motif\_115.m2m

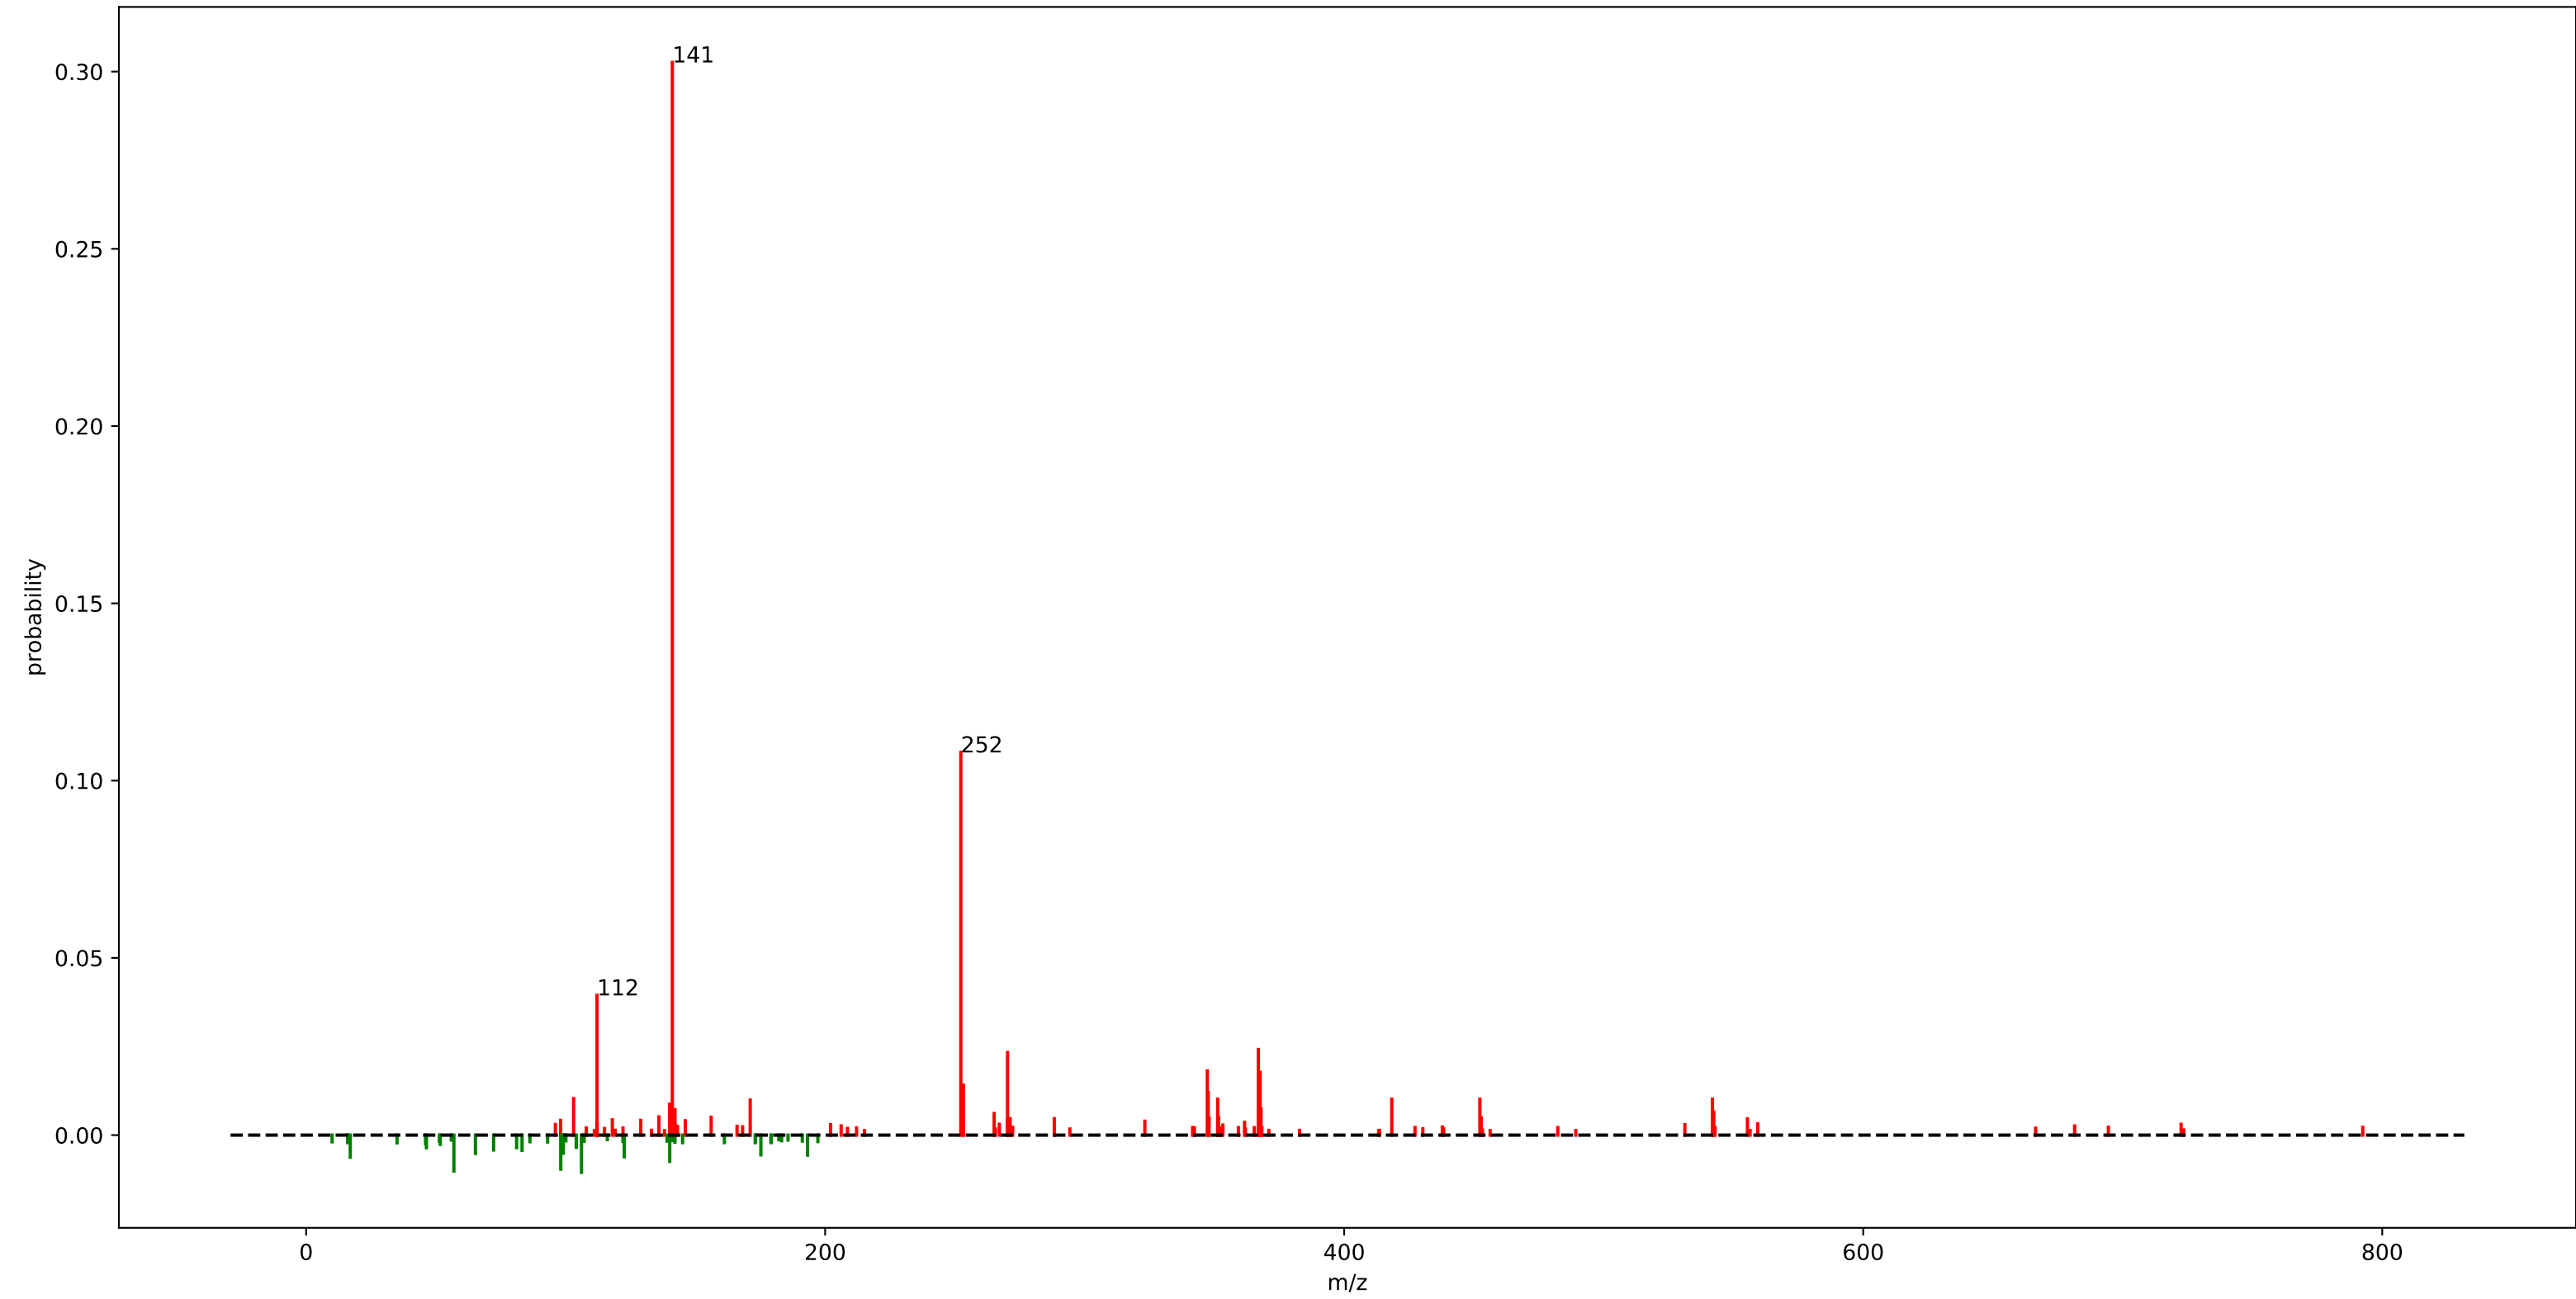

# rhabdus\_motif\_115.m2m

|                   |        |                   |        |
|-------------------|--------|-------------------|--------|
| fragment_141.1125 | : 0.30 | loss_140.1025     | : 0.01 |
| fragment_252.2675 | : 0.11 | fragment_367.9425 | : 0.01 |
| fragment_112.0825 | : 0.04 | fragment_142.1175 | : 0.01 |
| fragment_366.9375 | : 0.02 | fragment_542.4075 | : 0.01 |
| fragment_270.2775 | : 0.02 | loss_17.0025      | : 0.01 |
| fragment_347.2575 | : 0.02 | fragment_265.1225 | : 0.01 |
| fragment_367.6075 | : 0.02 | loss_122.5725     | : 0.01 |
| fragment_367.2725 | : 0.02 | loss_193.2075     | : 0.01 |
| fragment_253.2725 | : 0.01 | loss_175.2275     | : 0.01 |
| fragment_347.5925 | : 0.01 | loss_65.2425      | : 0.01 |
| loss_106.1025     | : 0.01 | fragment_135.9425 | : 0.01 |
| fragment_103.0725 | : 0.01 | loss_99.0775      | : 0.01 |
| loss_56.9325      | : 0.01 | fragment_156.0675 | : 0.01 |
| fragment_351.2475 | : 0.01 |                   |        |
| fragment_452.2825 | : 0.01 |                   |        |
| fragment_418.3325 | : 0.01 |                   |        |
| fragment_541.9025 | : 0.01 |                   |        |
| fragment_171.1175 | : 0.01 |                   |        |
| loss_98.1125      | : 0.01 |                   |        |
| fragment_140.0675 | : 0.01 |                   |        |

motif\_565

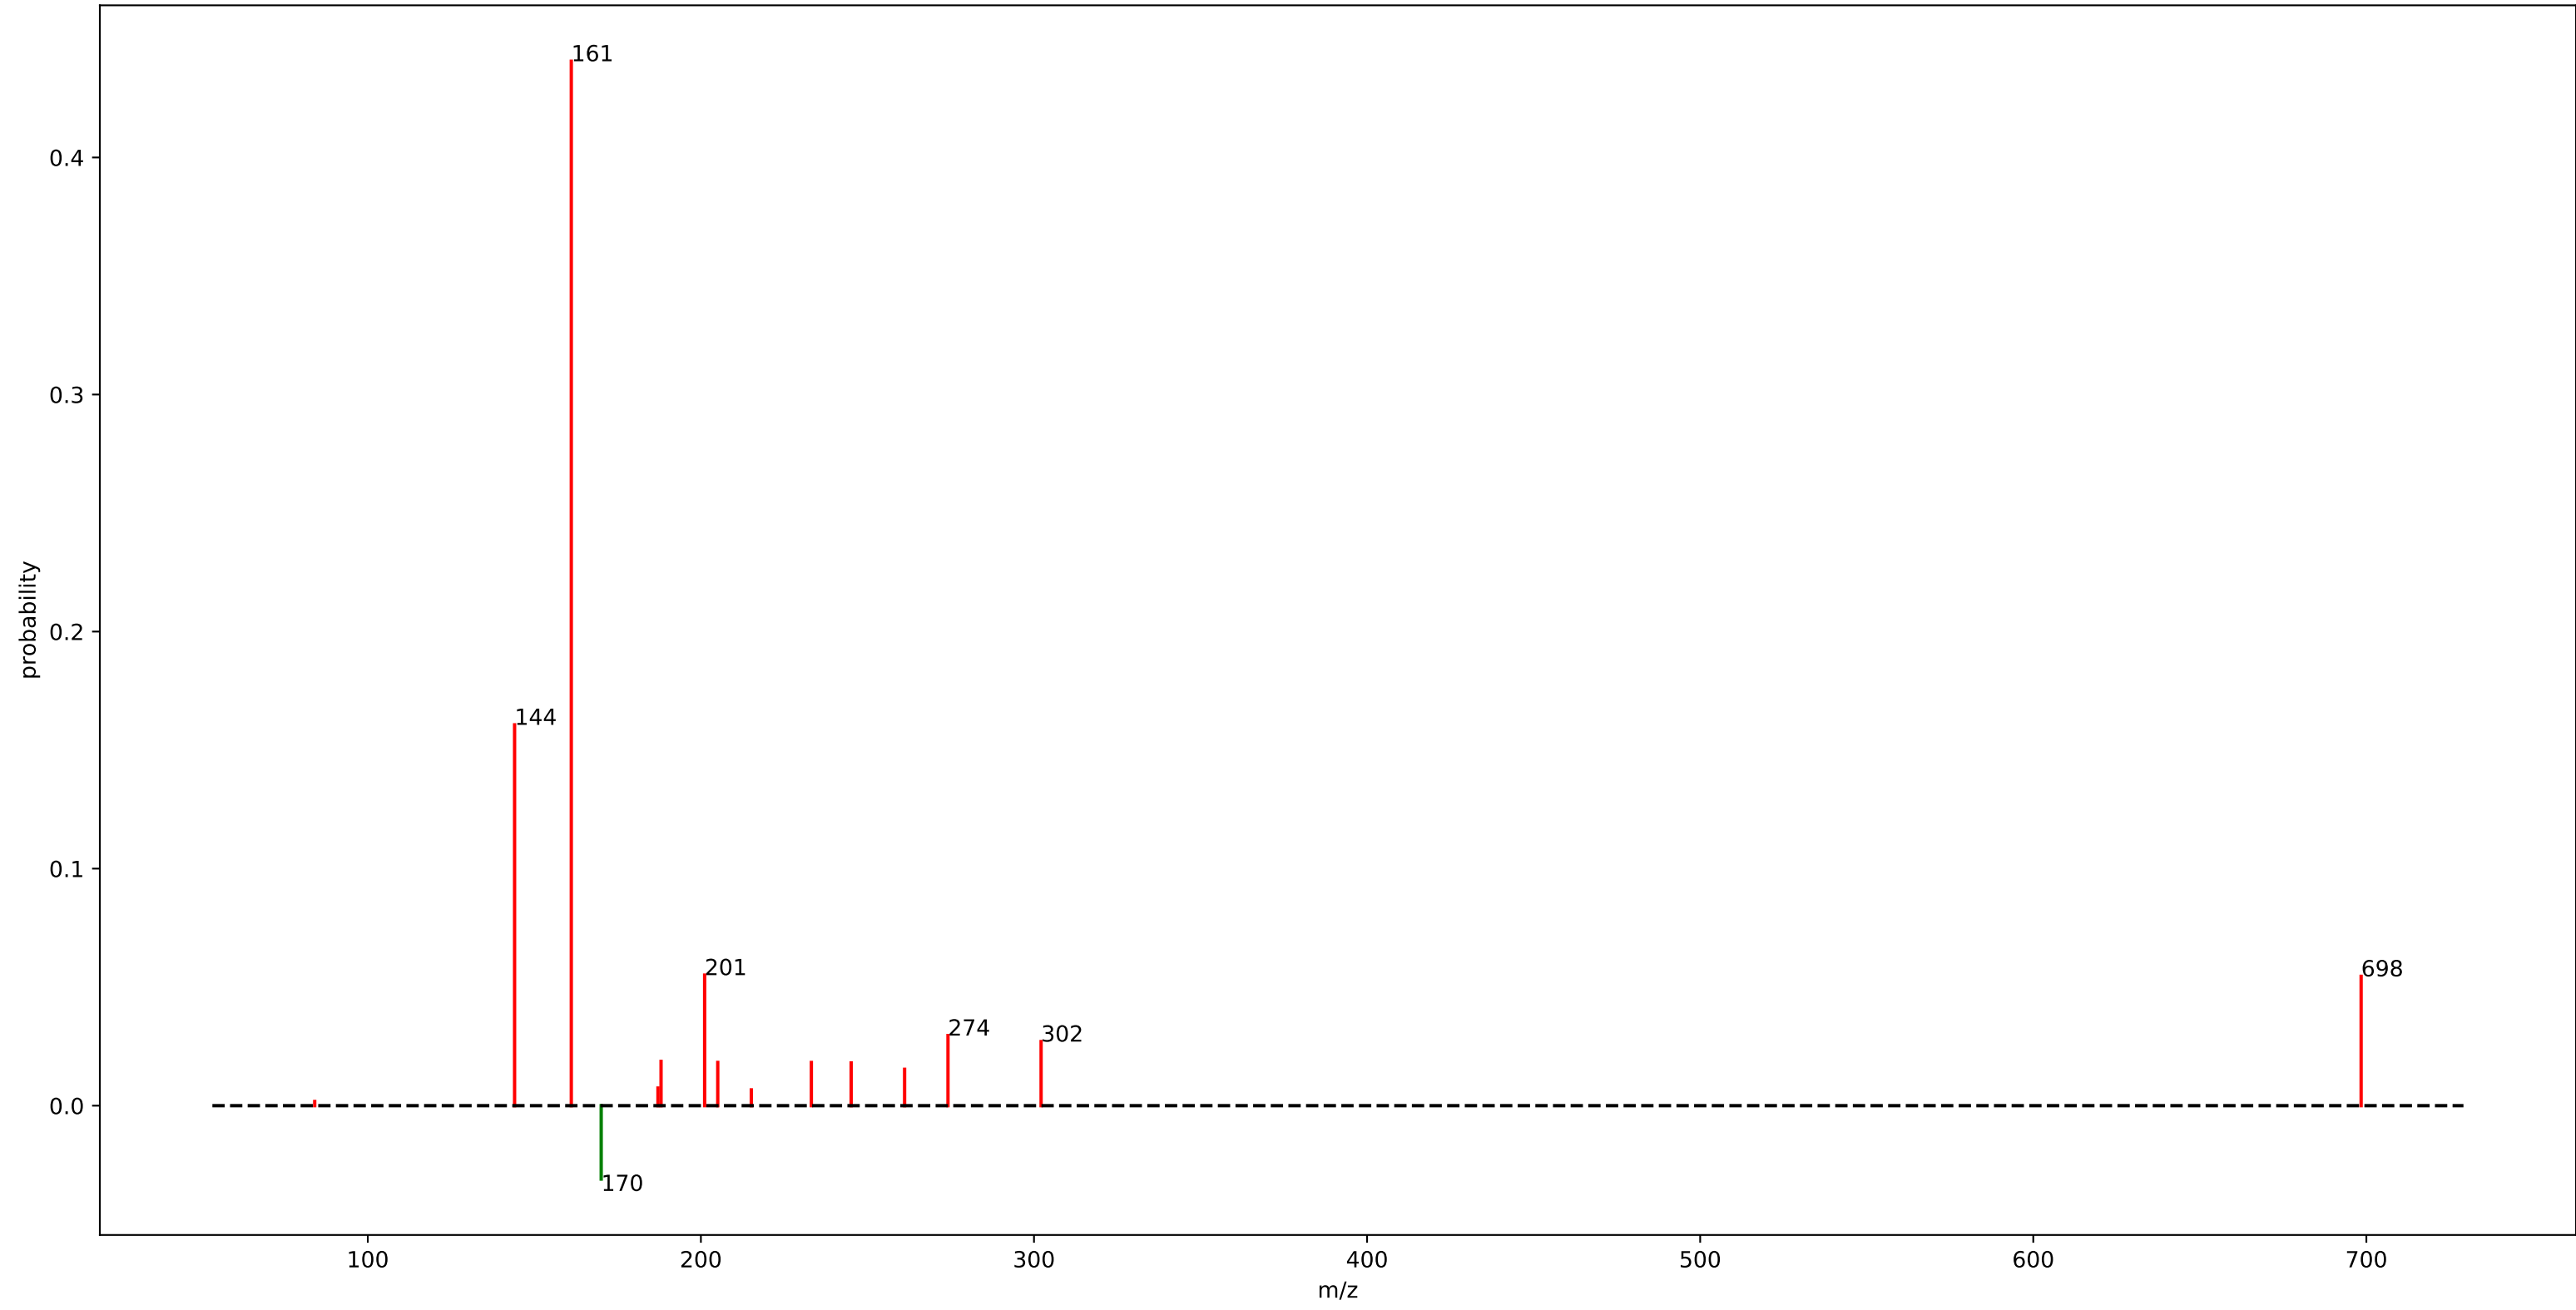

## motif\_565

|                   |        |
|-------------------|--------|
| fragment_161.0925 | : 0.44 |
| fragment_144.0675 | : 0.16 |
| fragment_201.1225 | : 0.06 |
| fragment_698.4275 | : 0.05 |
| loss_170.0675     | : 0.03 |
| fragment_274.1775 | : 0.03 |
| fragment_302.1325 | : 0.03 |
| fragment_188.0375 | : 0.02 |
| fragment_205.0625 | : 0.02 |
| fragment_233.1625 | : 0.02 |
| fragment_245.1125 | : 0.02 |
| fragment_261.1575 | : 0.02 |
| fragment_187.1125 | : 0.01 |
| fragment_215.1325 | : 0.01 |



motif\_562

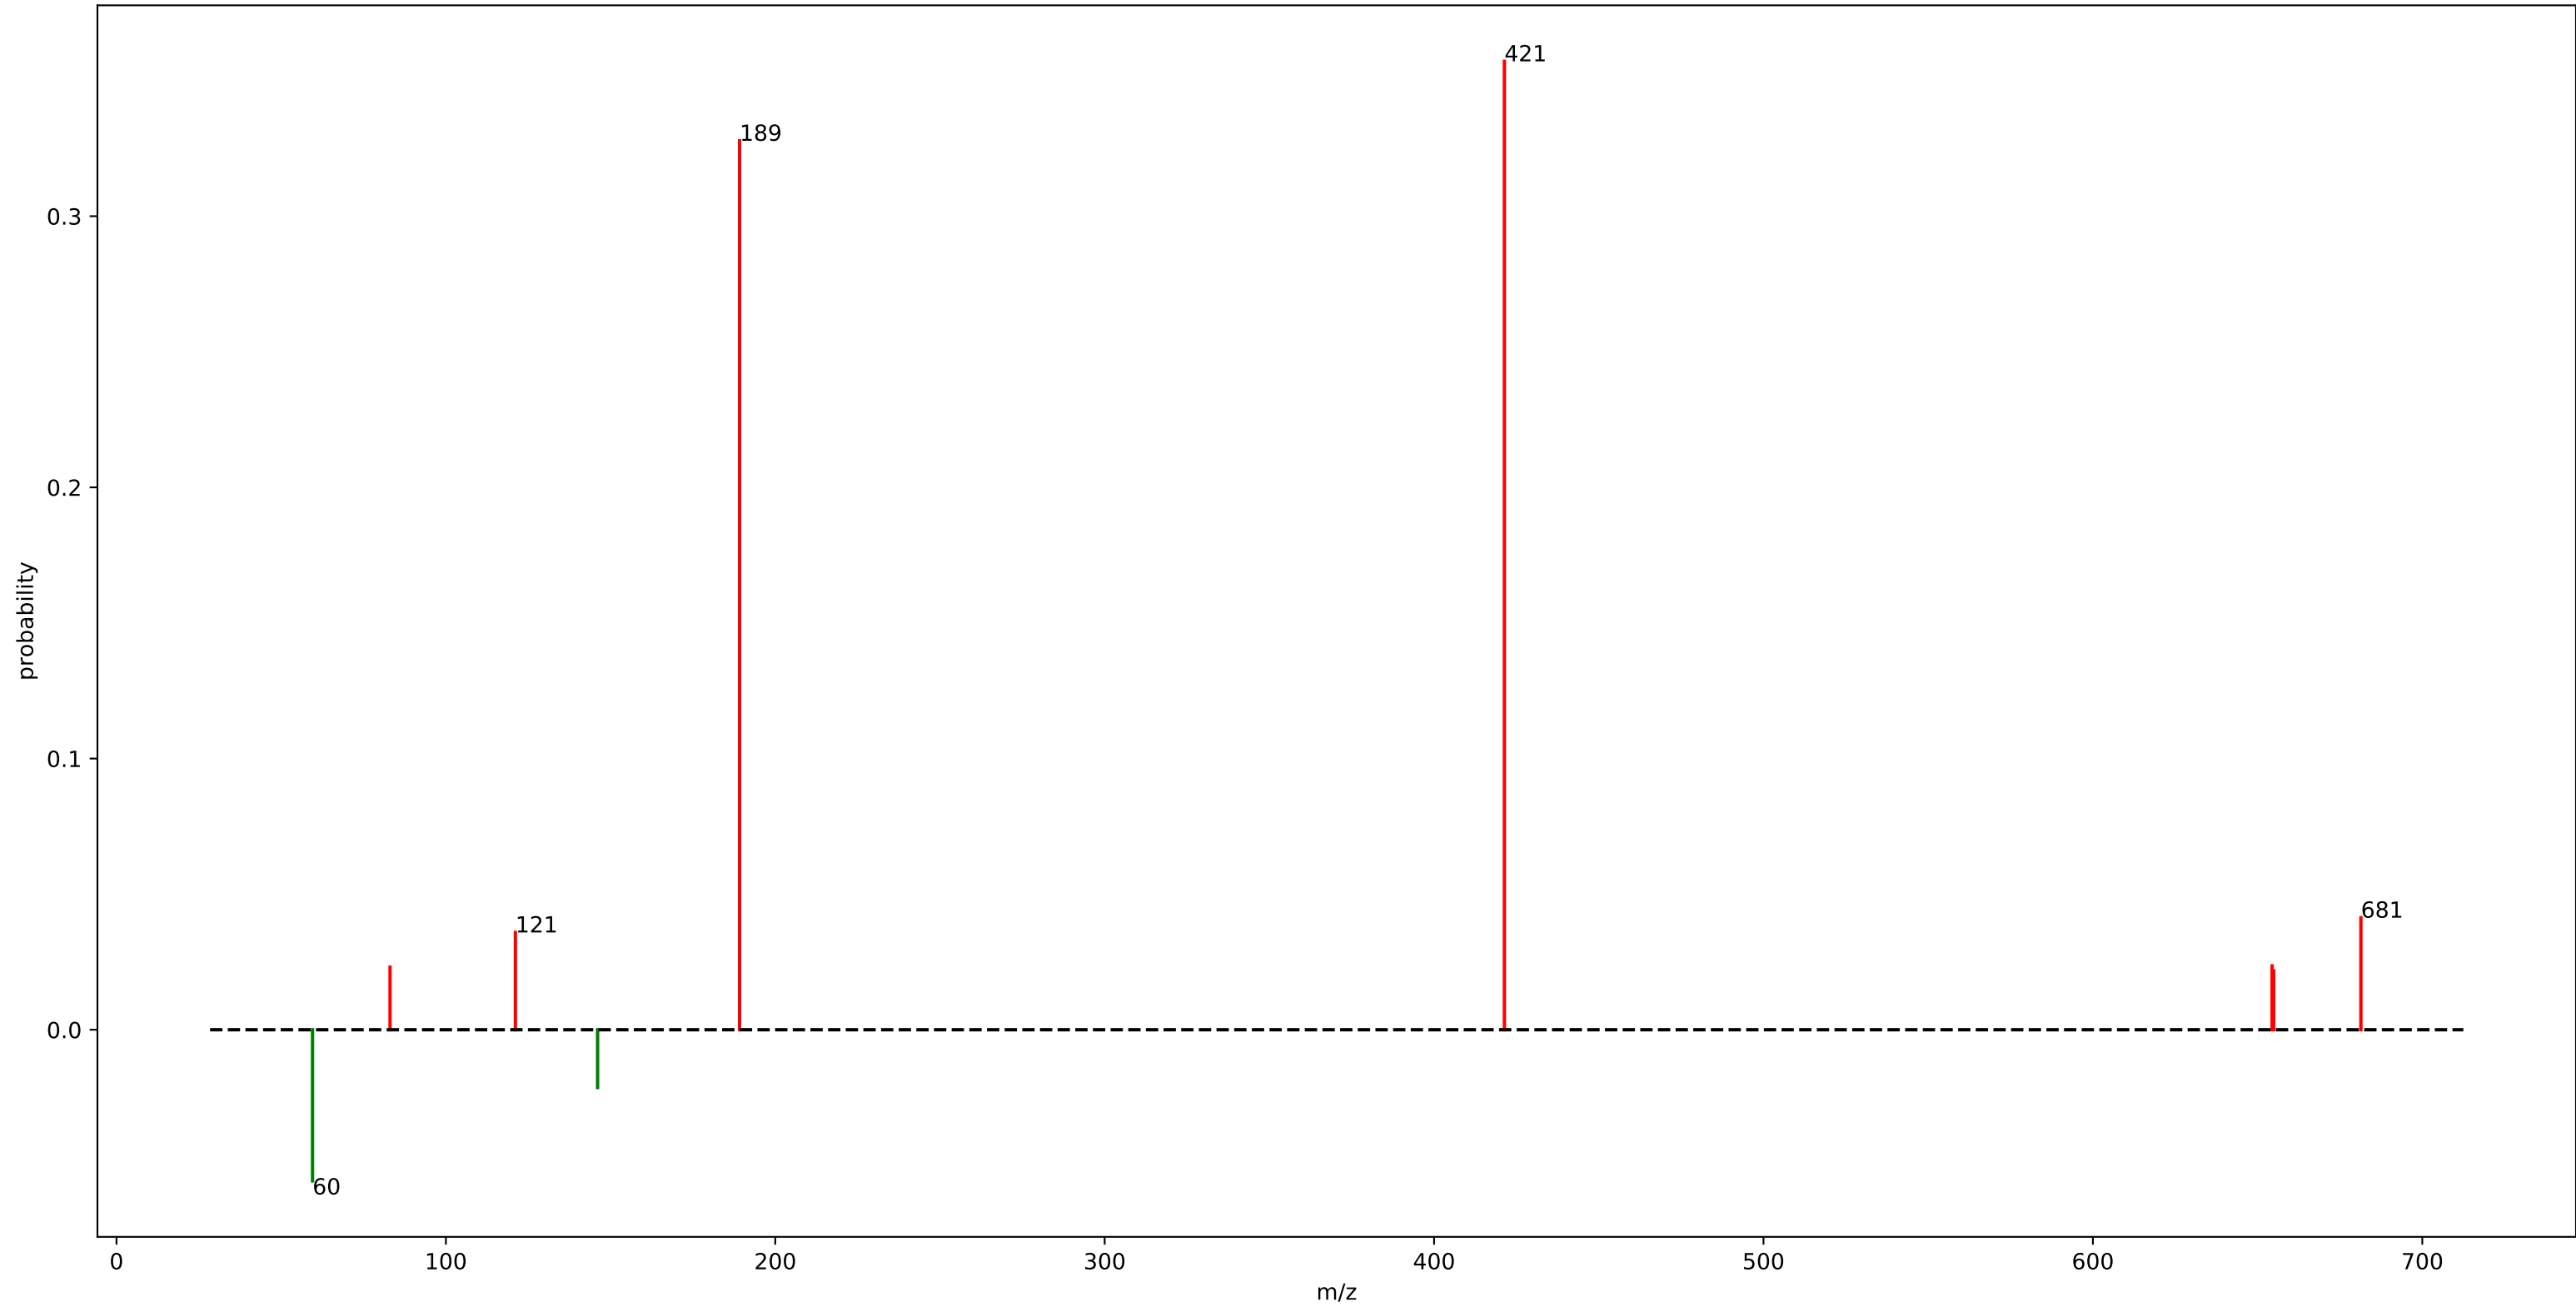

## motif\_562

|                   |        |
|-------------------|--------|
| fragment_421.3475 | : 0.36 |
| fragment_189.1625 | : 0.33 |
| loss_59.5125      | : 0.06 |
| fragment_681.3675 | : 0.04 |
| fragment_121.1025 | : 0.04 |
| fragment_654.4075 | : 0.02 |
| fragment_83.0475  | : 0.02 |
| fragment_654.9075 | : 0.02 |
| loss_146.0525     | : 0.02 |

urine\_mass2motif\_249.m2m

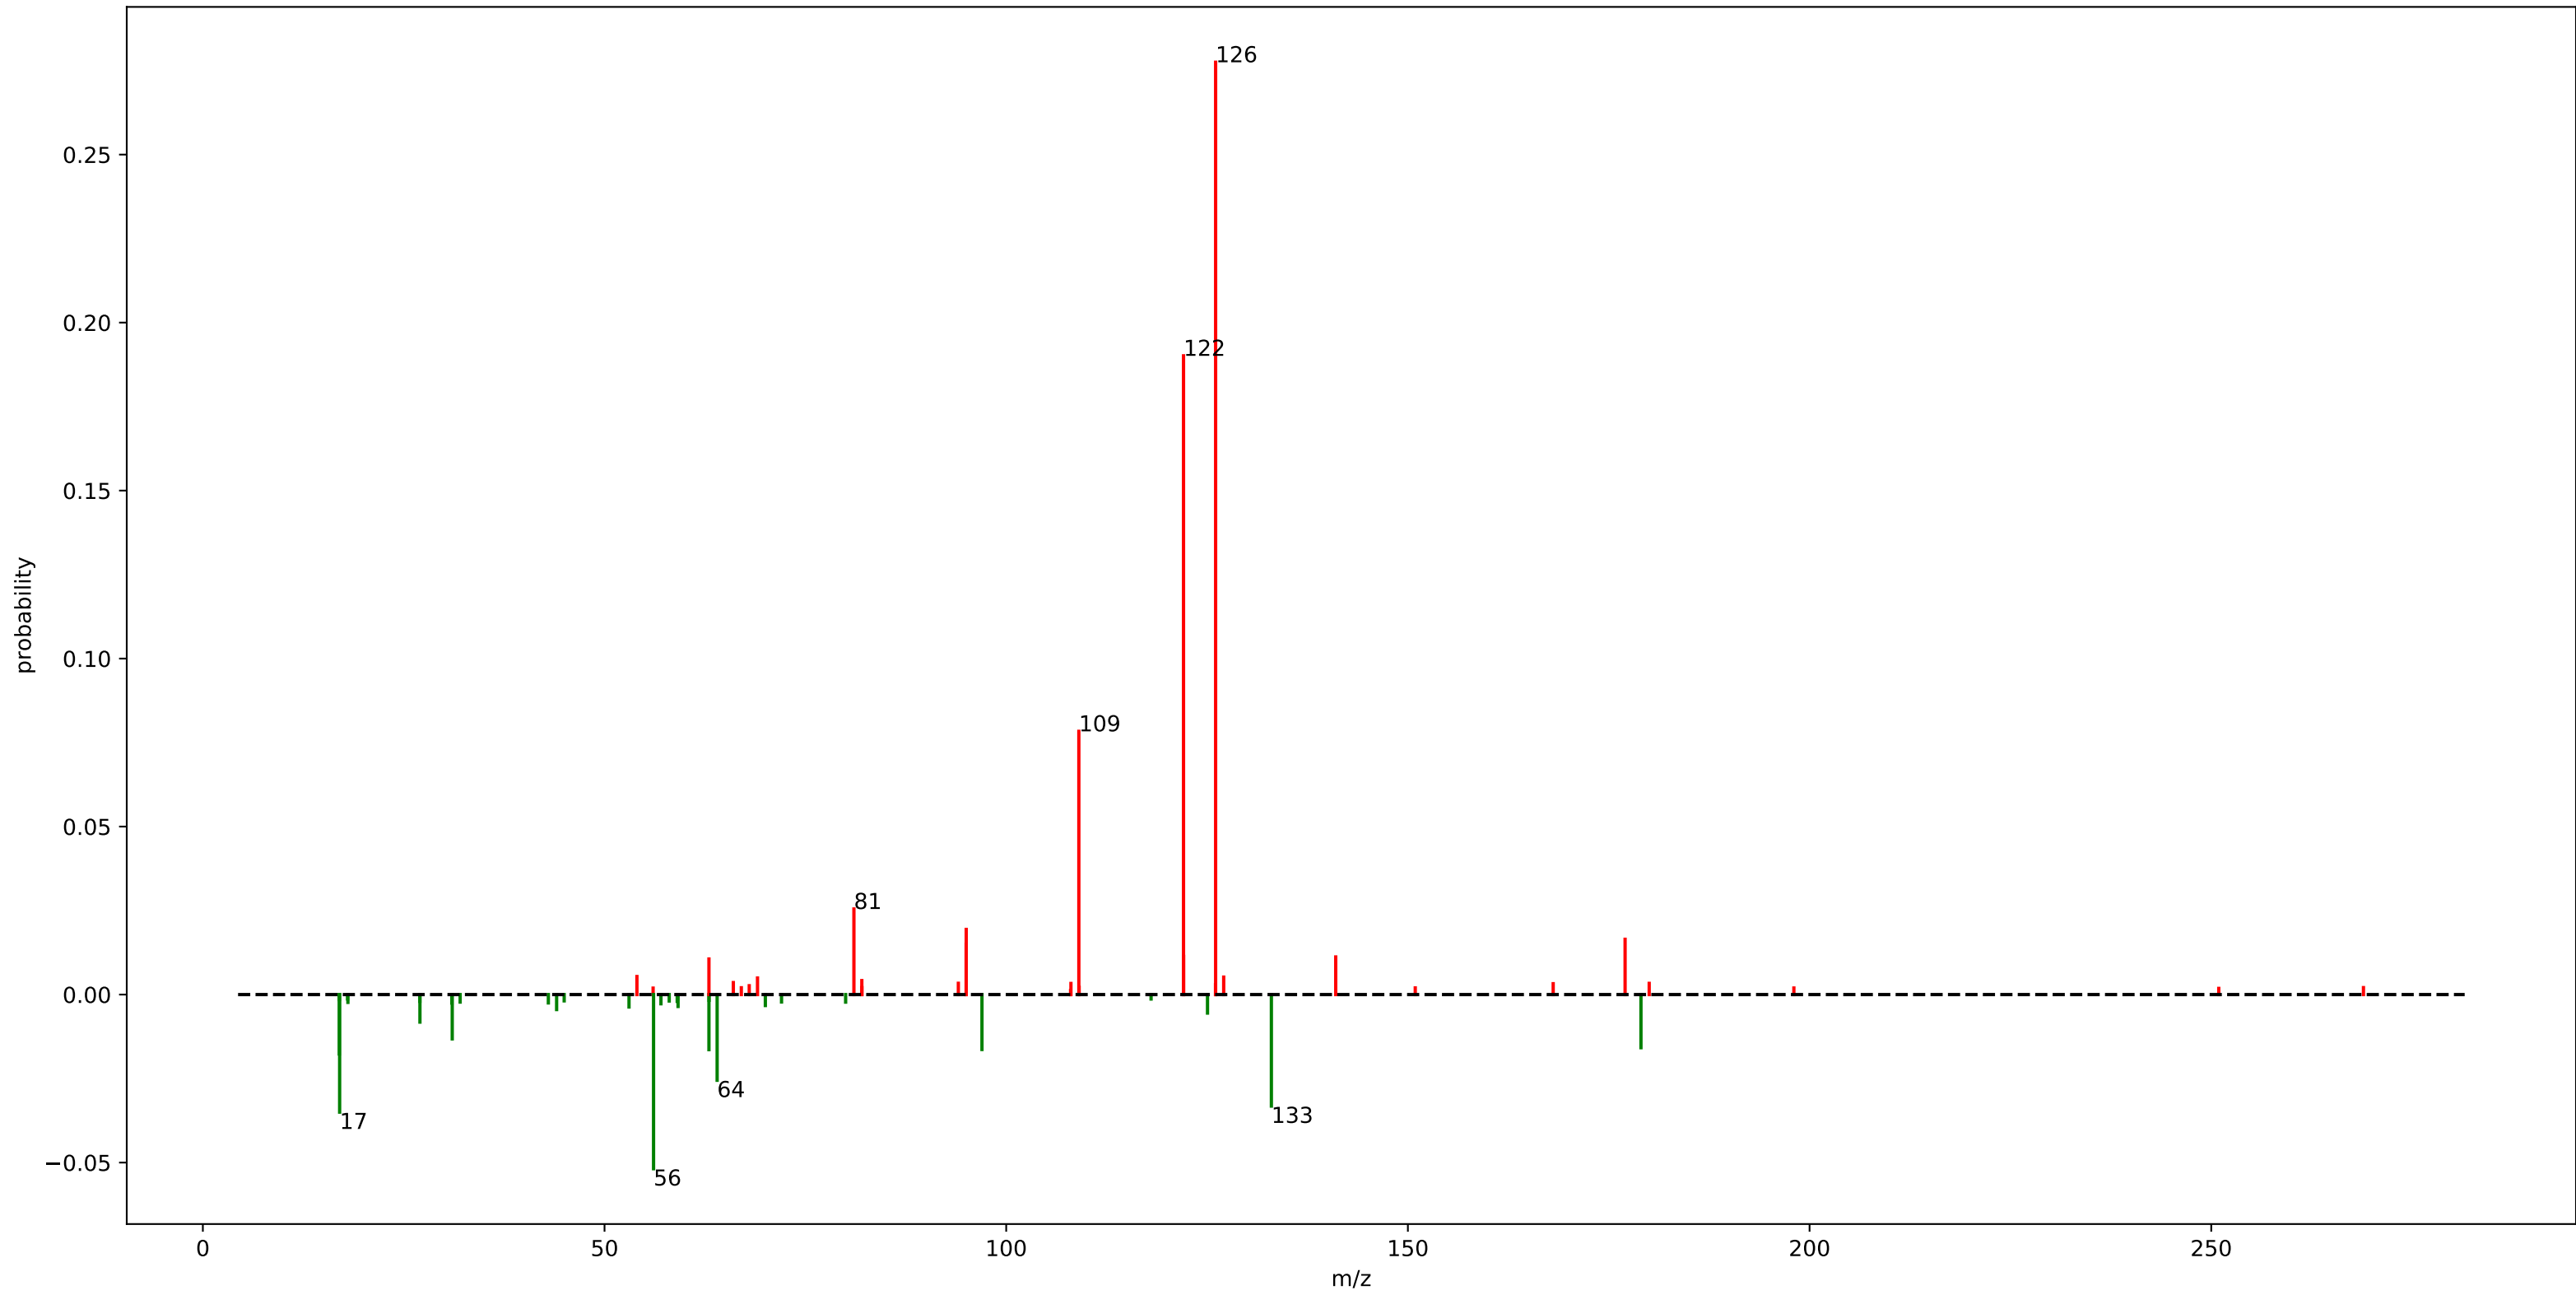

# urine\_mass2motif\_249.m2m

|                   |        |                   |        |
|-------------------|--------|-------------------|--------|
| fragment_126.0675 | : 0.28 | loss_125.0575     | : 0.01 |
| fragment_122.0725 | : 0.19 | fragment_54.0325  | : 0.01 |
| fragment_109.0425 | : 0.08 | fragment_127.0725 | : 0.01 |
| loss_56.1025      | : 0.05 |                   |        |
| loss_17.0275      | : 0.03 |                   |        |
| loss_133.0075     | : 0.03 |                   |        |
| loss_64.0175      | : 0.03 |                   |        |
| fragment_81.0425  | : 0.03 |                   |        |
| fragment_95.0225  | : 0.02 |                   |        |
| loss_16.9825      | : 0.02 |                   |        |
| fragment_177.0375 | : 0.02 |                   |        |
| loss_62.9975      | : 0.02 |                   |        |
| loss_96.9825      | : 0.02 |                   |        |
| loss_179.0125     | : 0.02 |                   |        |
| fragment_95.0125  | : 0.01 |                   |        |
| loss_31.0425      | : 0.01 |                   |        |
| fragment_122.0825 | : 0.01 |                   |        |
| fragment_141.0175 | : 0.01 |                   |        |
| fragment_62.9975  | : 0.01 |                   |        |
| loss_27.0225      | : 0.01 |                   |        |

motif\_560

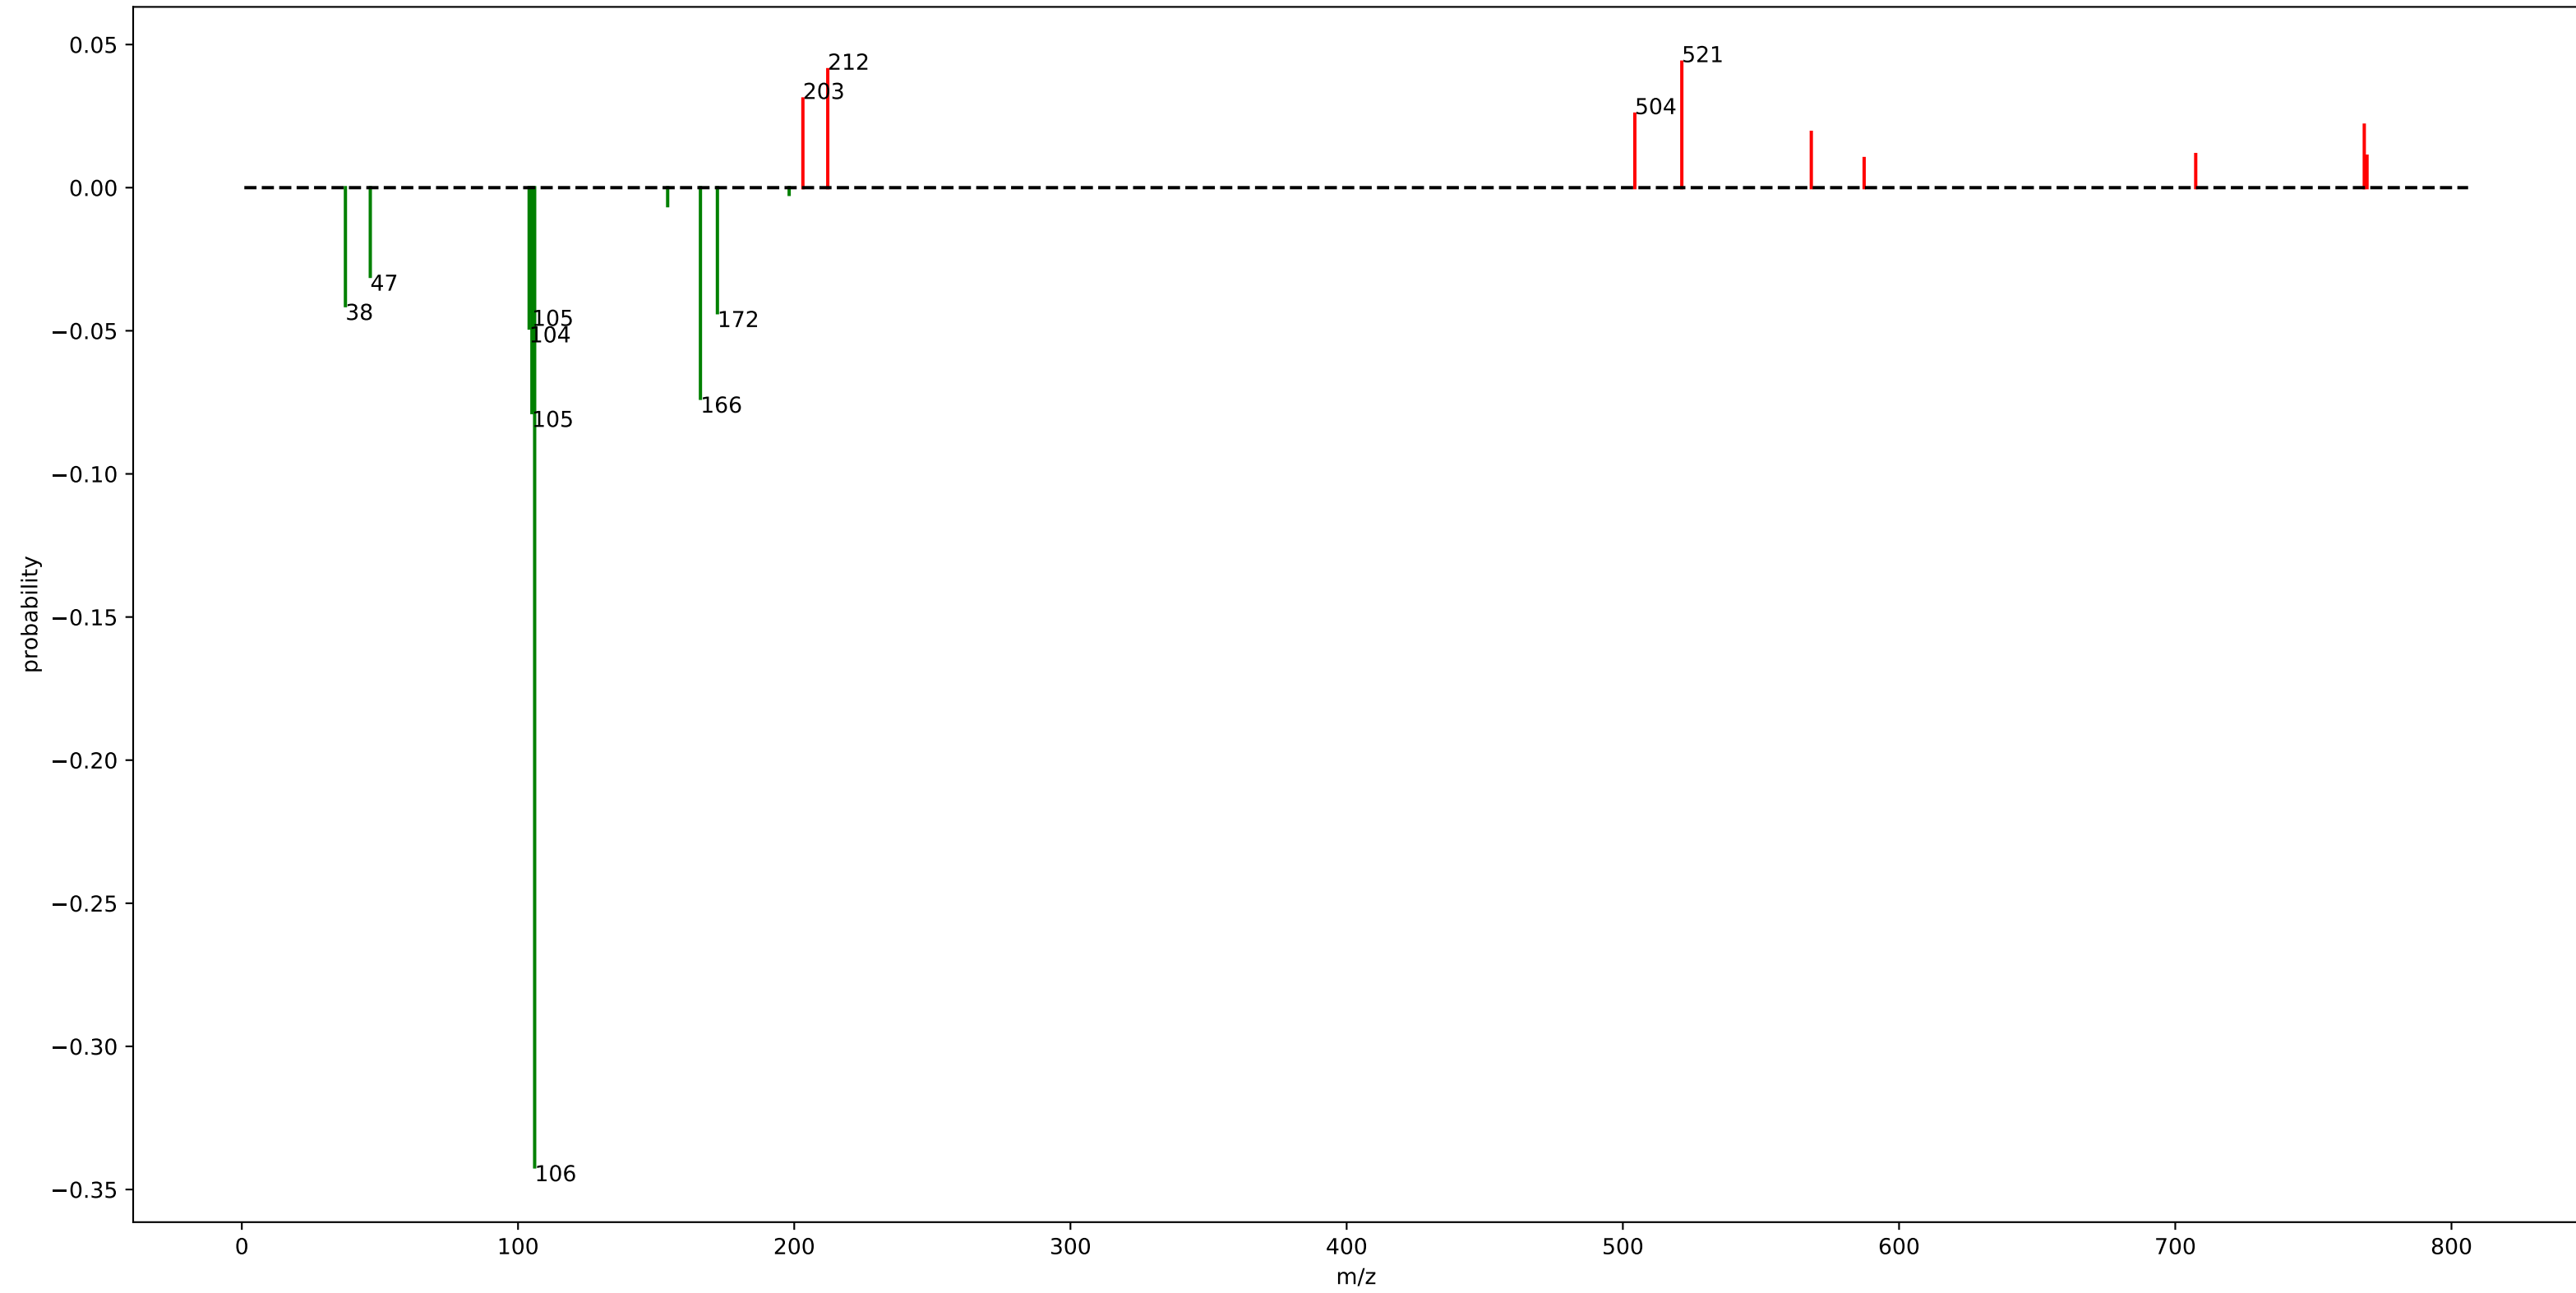

## motif\_560

|                   |        |
|-------------------|--------|
| loss_106.0225     | : 0.34 |
| loss_105.0225     | : 0.08 |
| loss_166.0425     | : 0.07 |
| loss_104.0225     | : 0.05 |
| fragment_521.3475 | : 0.04 |
| loss_172.1825     | : 0.04 |
| loss_105.0175     | : 0.04 |
| loss_37.5075      | : 0.04 |
| fragment_212.1375 | : 0.04 |
| loss_46.5125      | : 0.03 |
| fragment_203.1325 | : 0.03 |
| fragment_504.3375 | : 0.03 |
| fragment_768.4275 | : 0.02 |
| fragment_568.2275 | : 0.02 |
| fragment_707.4025 | : 0.01 |
| fragment_769.4225 | : 0.01 |
| fragment_587.3575 | : 0.01 |
| loss_154.1725     | : 0.01 |

motif\_561

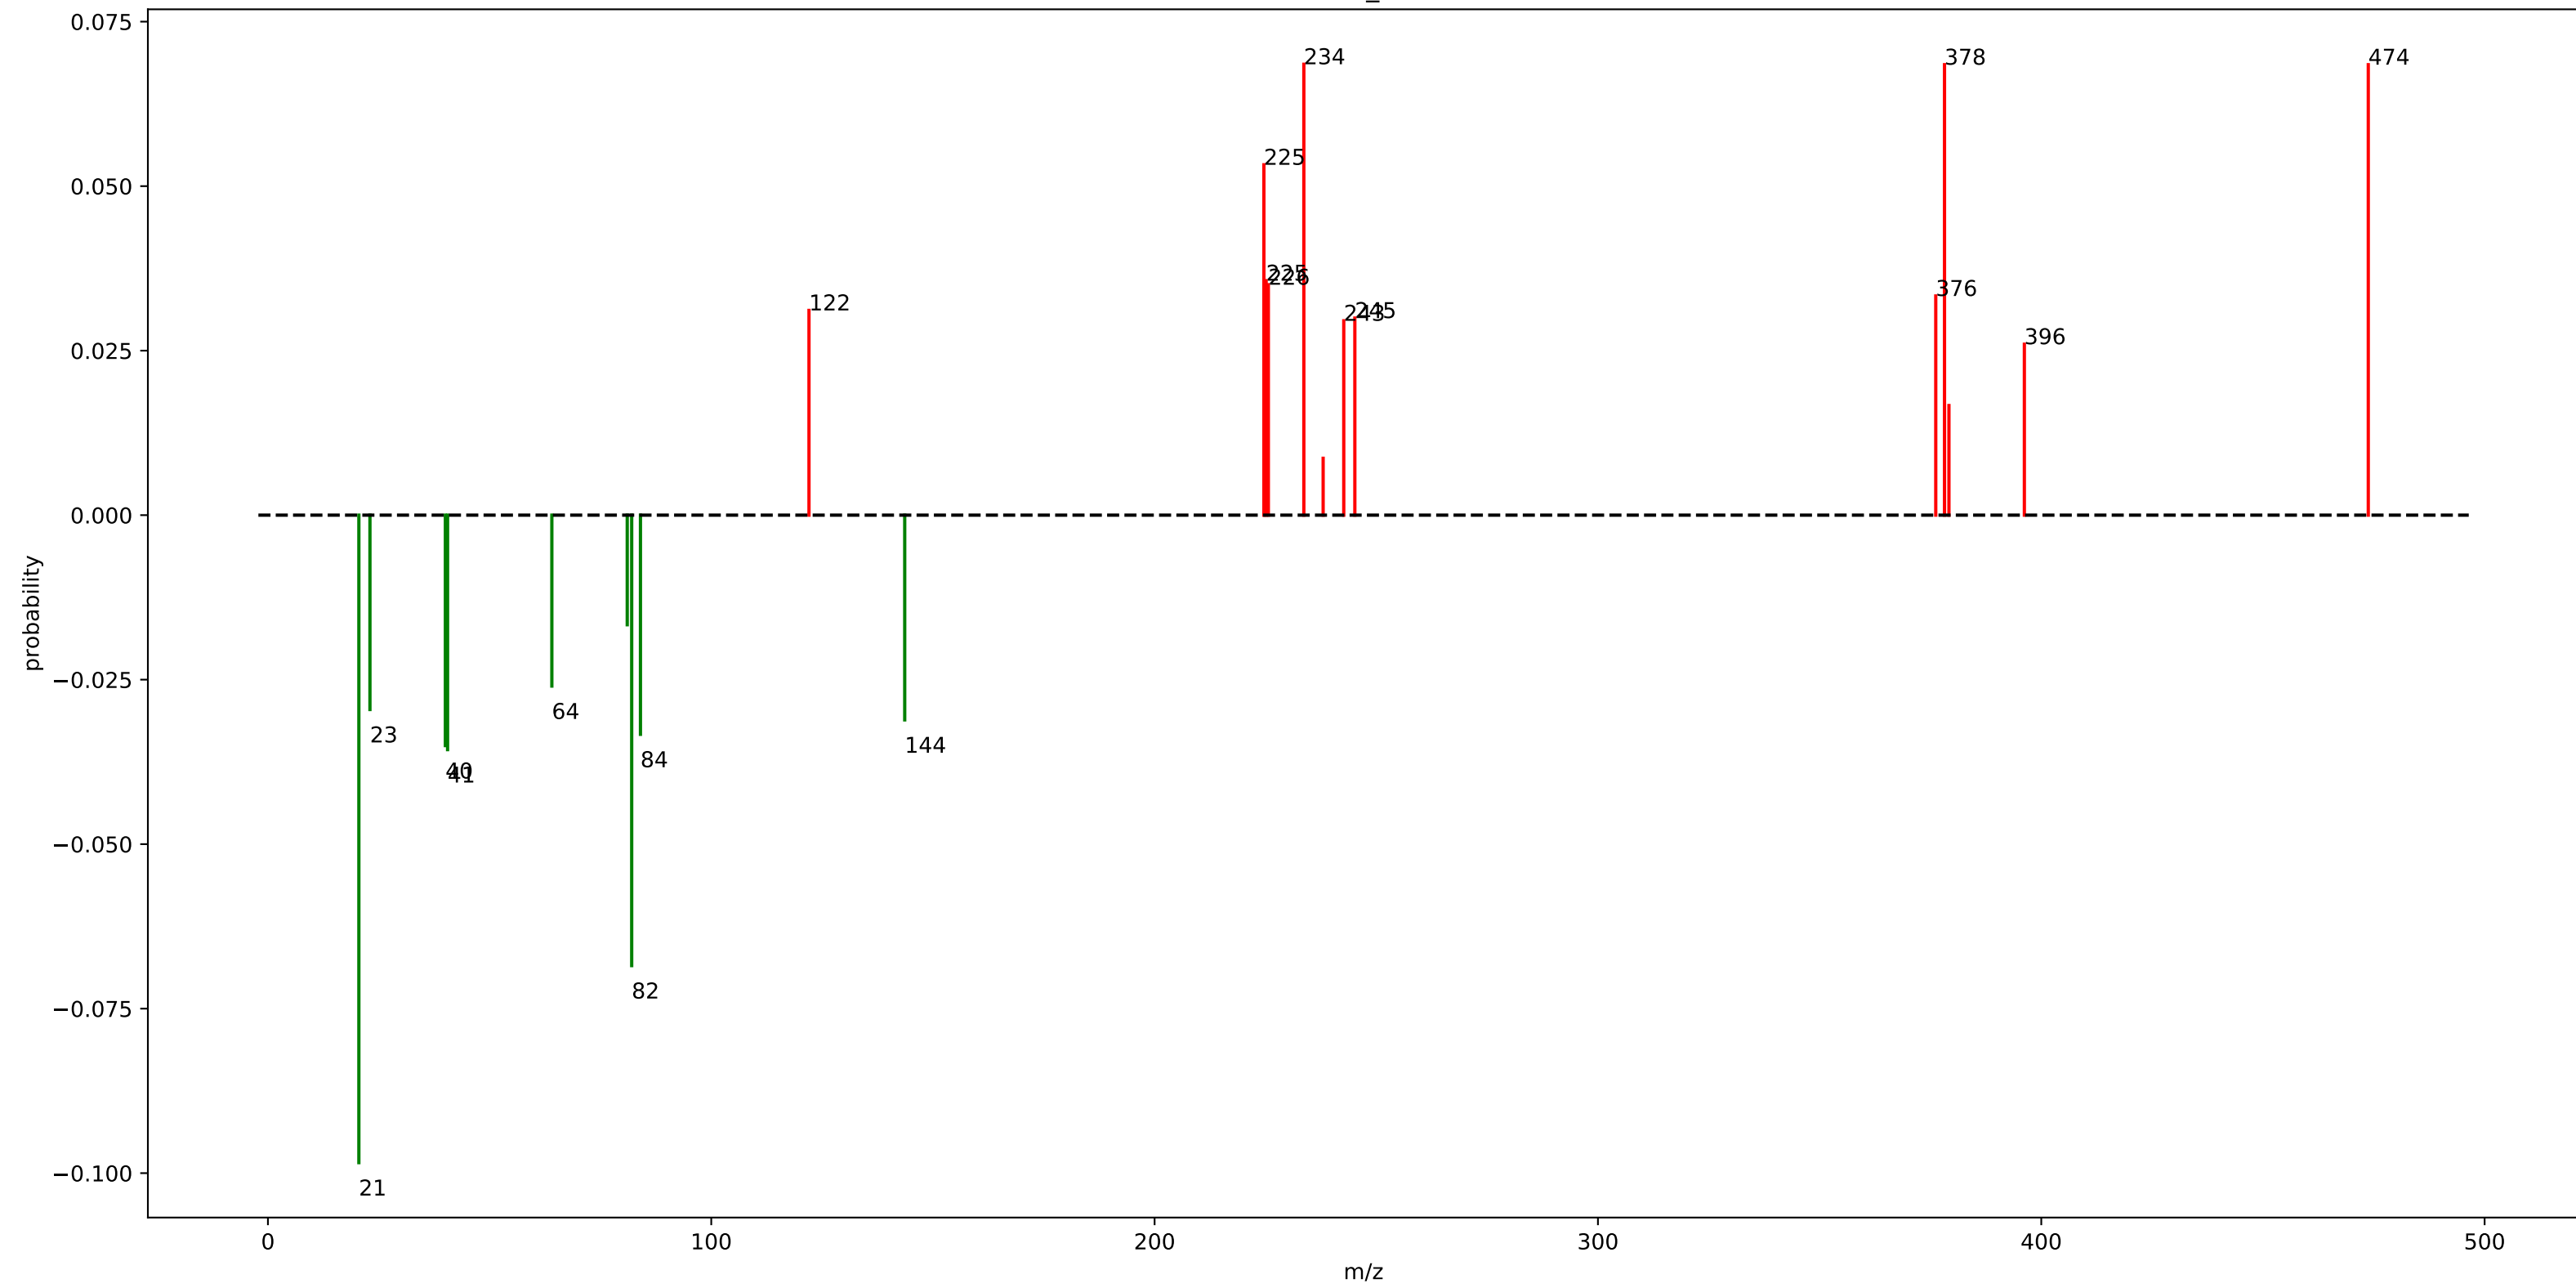

# motif\_561

|                   |        |                   |        |
|-------------------|--------|-------------------|--------|
| loss_20.5125      | : 0.10 | fragment_379.1725 | : 0.02 |
| fragment_233.6625 | : 0.07 | fragment_238.0175 | : 0.01 |
| loss_82.0525      | : 0.07 |                   |        |
| fragment_378.1725 | : 0.07 |                   |        |
| fragment_473.7575 | : 0.07 |                   |        |
| fragment_224.6525 | : 0.05 |                   |        |
| fragment_225.1575 | : 0.04 |                   |        |
| loss_40.5225      | : 0.04 |                   |        |
| loss_40.0225      | : 0.04 |                   |        |
| fragment_225.6575 | : 0.04 |                   |        |
| fragment_376.1975 | : 0.03 |                   |        |
| loss_84.0275      | : 0.03 |                   |        |
| fragment_122.0425 | : 0.03 |                   |        |
| loss_143.6375     | : 0.03 |                   |        |
| fragment_245.1675 | : 0.03 |                   |        |
| fragment_242.6675 | : 0.03 |                   |        |
| loss_23.0125      | : 0.03 |                   |        |
| fragment_396.1825 | : 0.03 |                   |        |
| loss_64.0425      | : 0.03 |                   |        |
| loss_81.0475      | : 0.02 |                   |        |



motif\_647

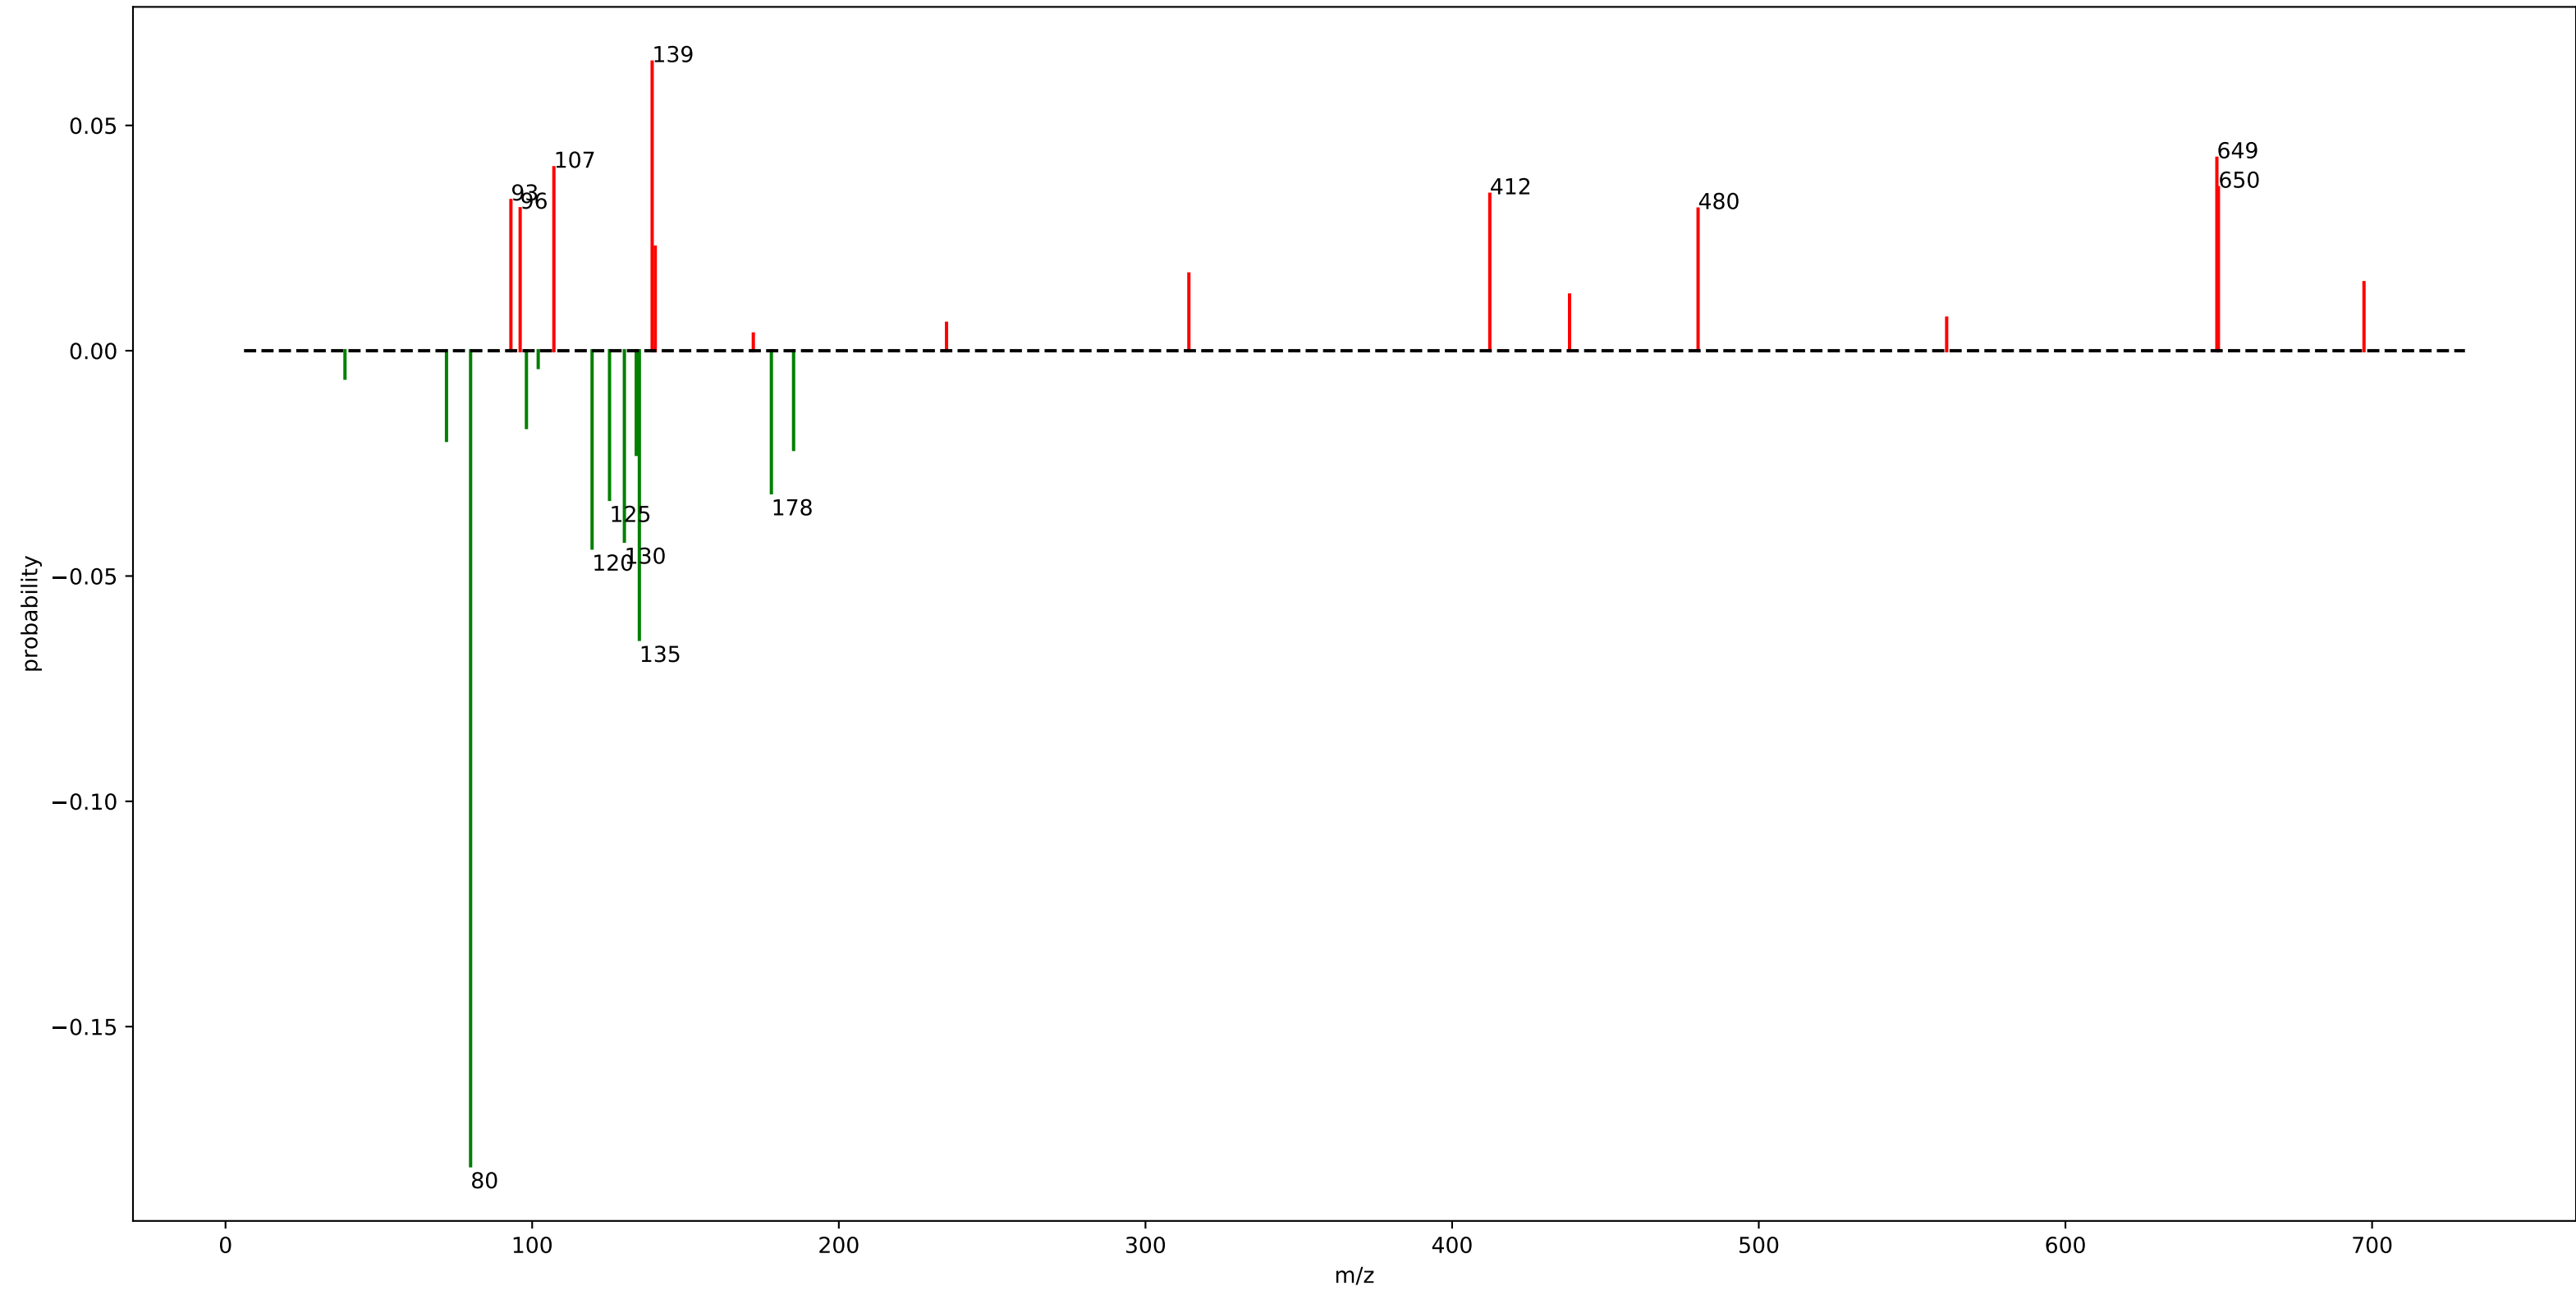

## motif\_647

|                   |        |                   |        |
|-------------------|--------|-------------------|--------|
| loss_79.9225      | : 0.18 | fragment_697.3625 | : 0.02 |
| fragment_139.1325 | : 0.06 | fragment_438.2975 | : 0.01 |
| loss_134.9525     | : 0.06 | fragment_561.2725 | : 0.01 |
| loss_119.5375     | : 0.04 | loss_38.9575      | : 0.01 |
| fragment_649.3875 | : 0.04 | fragment_235.1275 | : 0.01 |
| loss_130.0675     | : 0.04 |                   |        |
| fragment_107.0825 | : 0.04 |                   |        |
| fragment_649.8875 | : 0.04 |                   |        |
| fragment_412.2875 | : 0.03 |                   |        |
| fragment_93.0675  | : 0.03 |                   |        |
| loss_125.2275     | : 0.03 |                   |        |
| loss_178.0075     | : 0.03 |                   |        |
| fragment_96.0825  | : 0.03 |                   |        |
| fragment_480.2075 | : 0.03 |                   |        |
| loss_133.9475     | : 0.02 |                   |        |
| fragment_140.1425 | : 0.02 |                   |        |
| loss_185.2475     | : 0.02 |                   |        |
| loss_72.0625      | : 0.02 |                   |        |
| loss_98.1325      | : 0.02 |                   |        |
| fragment_314.1525 | : 0.02 |                   |        |

motif\_646

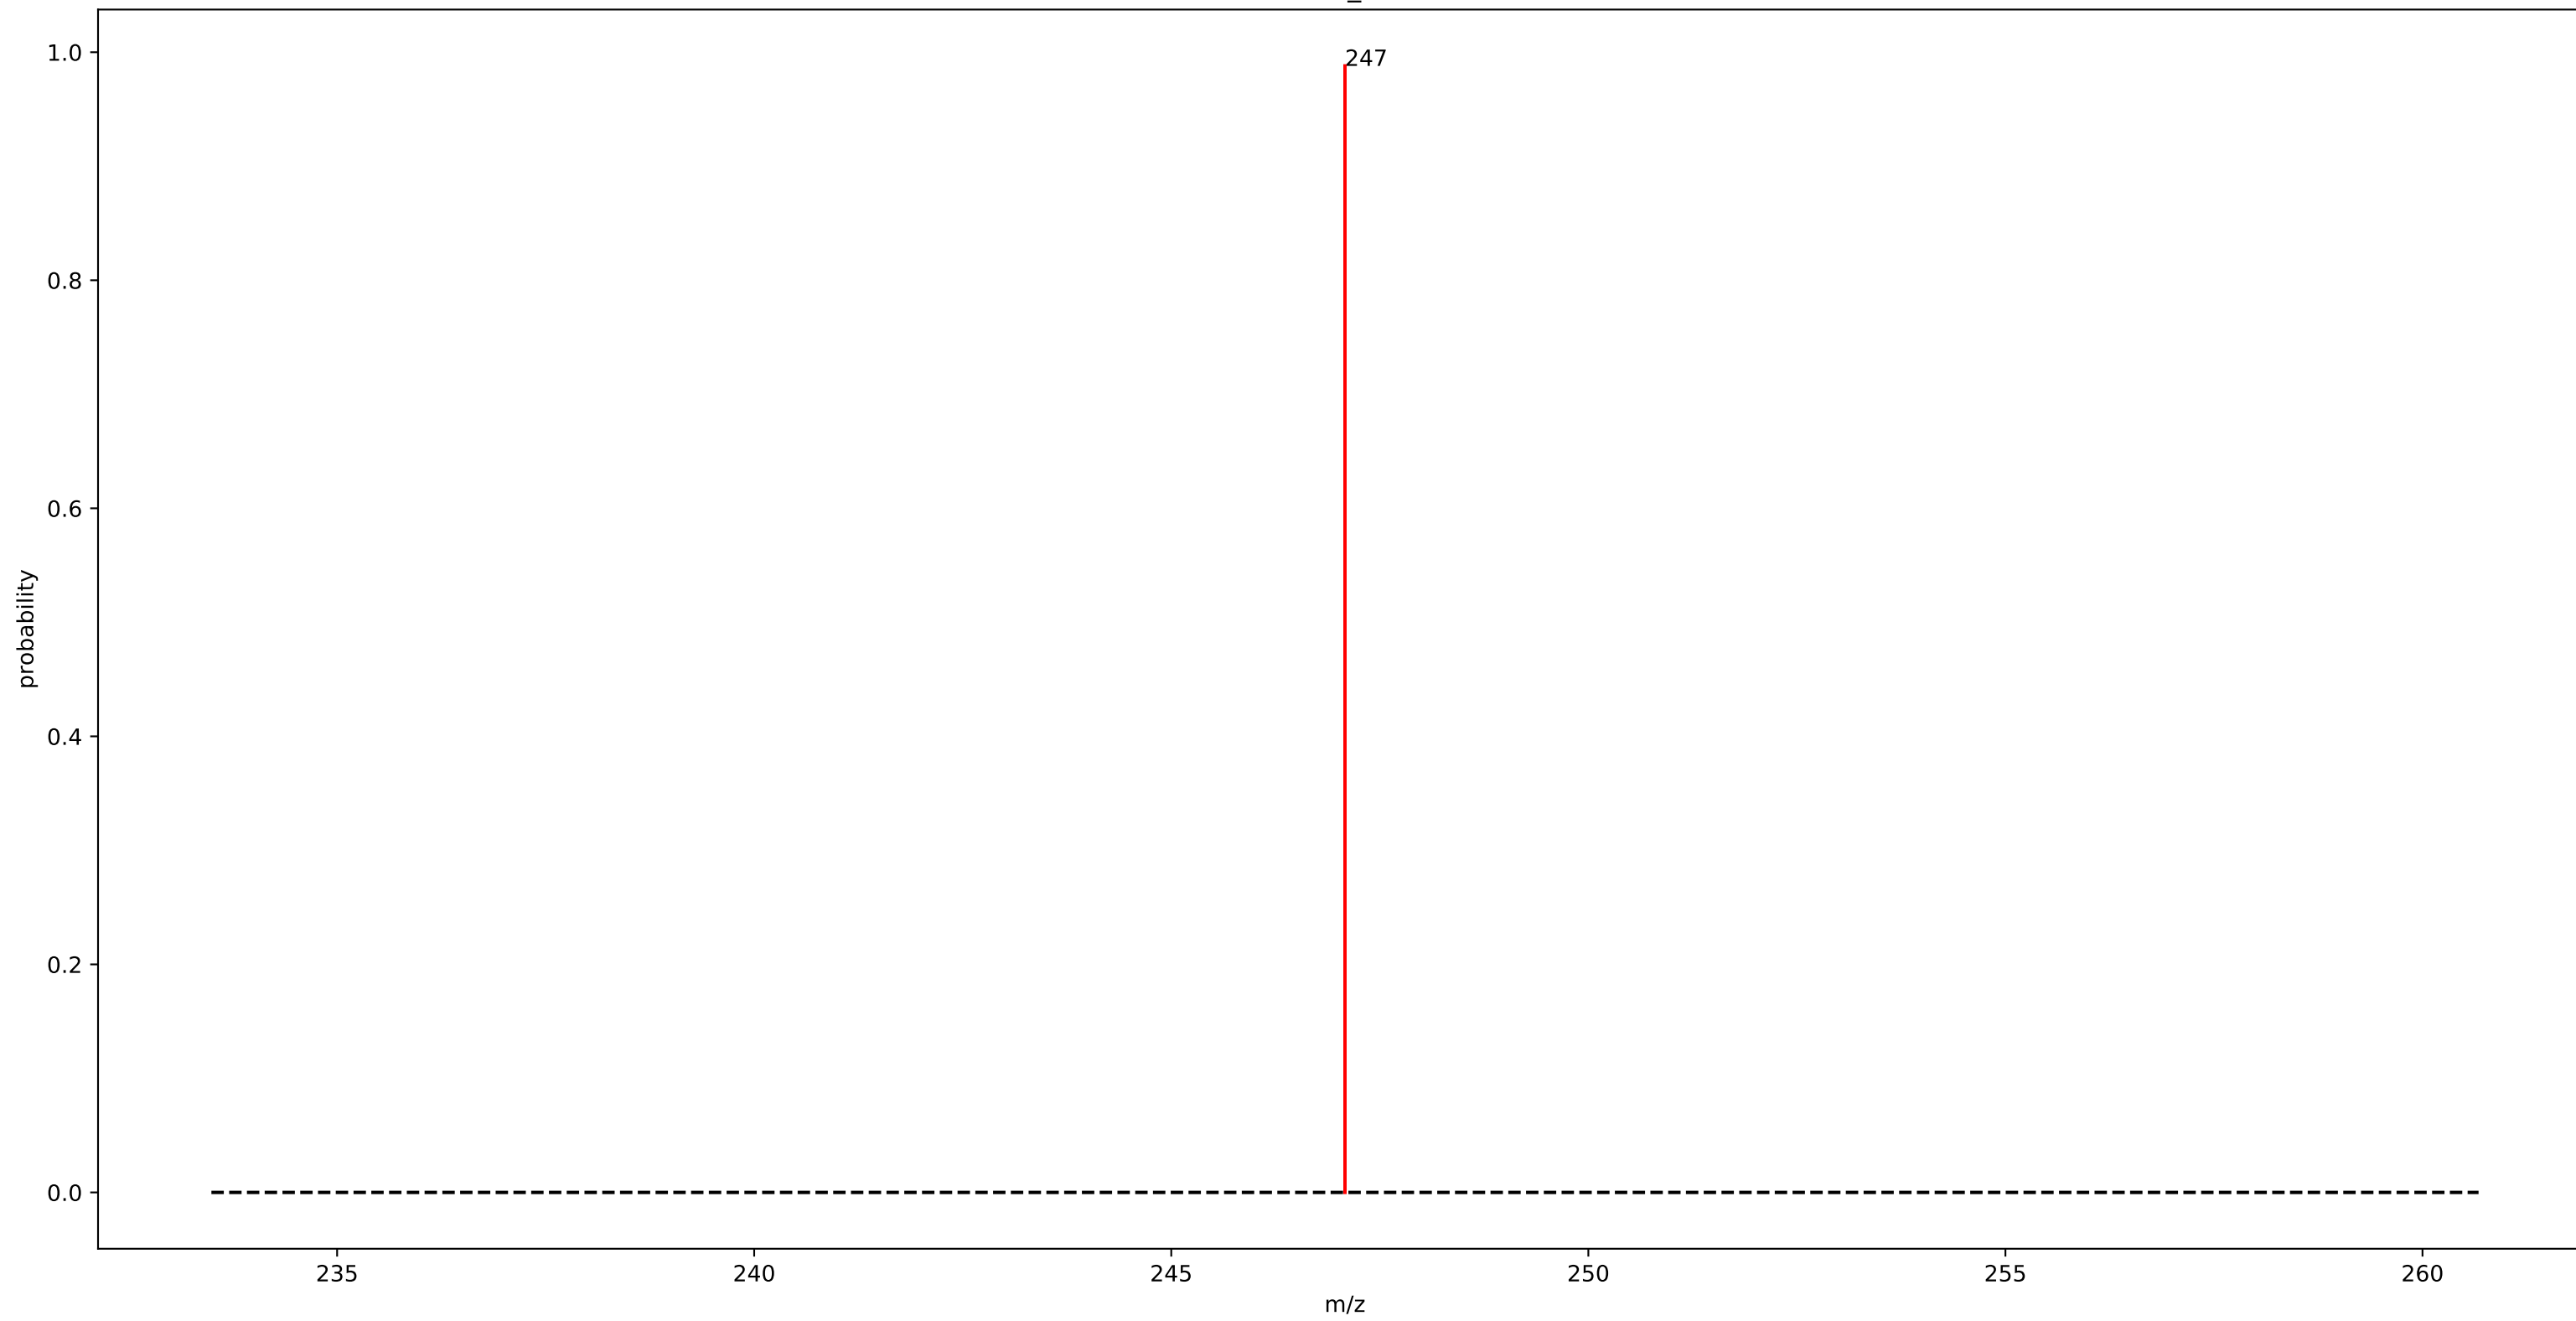

## motif\_646

fragment\_247.0825 : 0.99

motif\_645

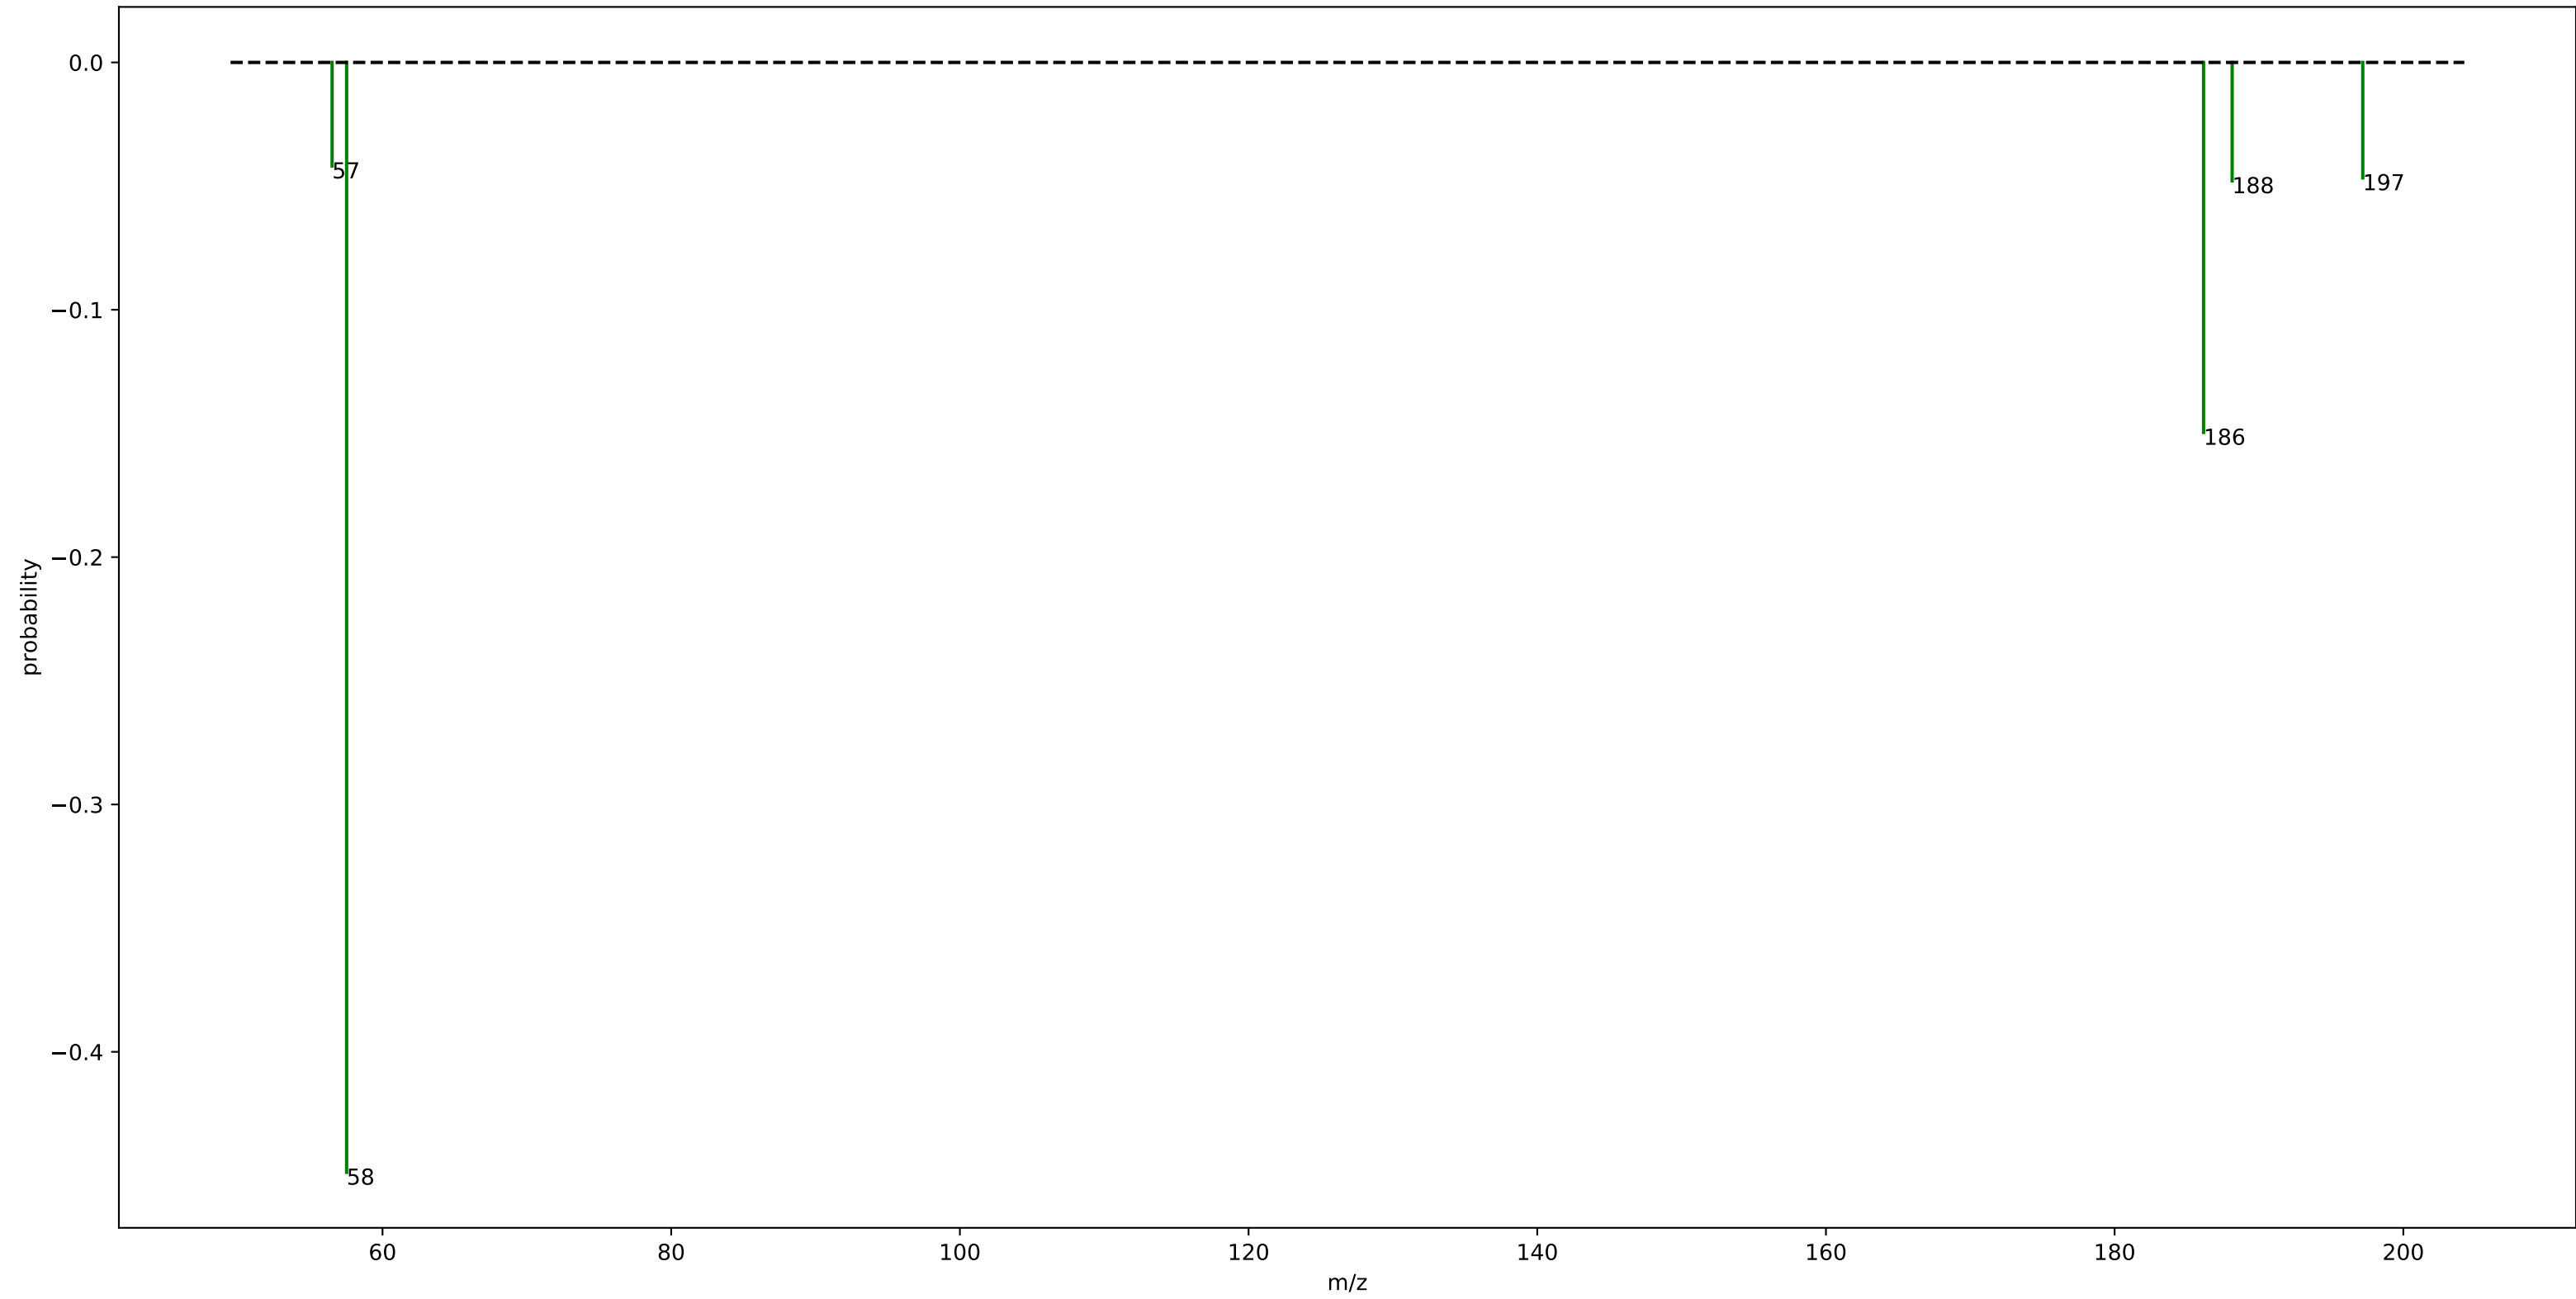

## motif\_645

|               |        |
|---------------|--------|
| loss_57.5125  | : 0.45 |
| loss_186.1625 | : 0.15 |
| loss_188.1425 | : 0.05 |
| loss_197.1925 | : 0.05 |
| loss_56.5075  | : 0.04 |

motif\_644

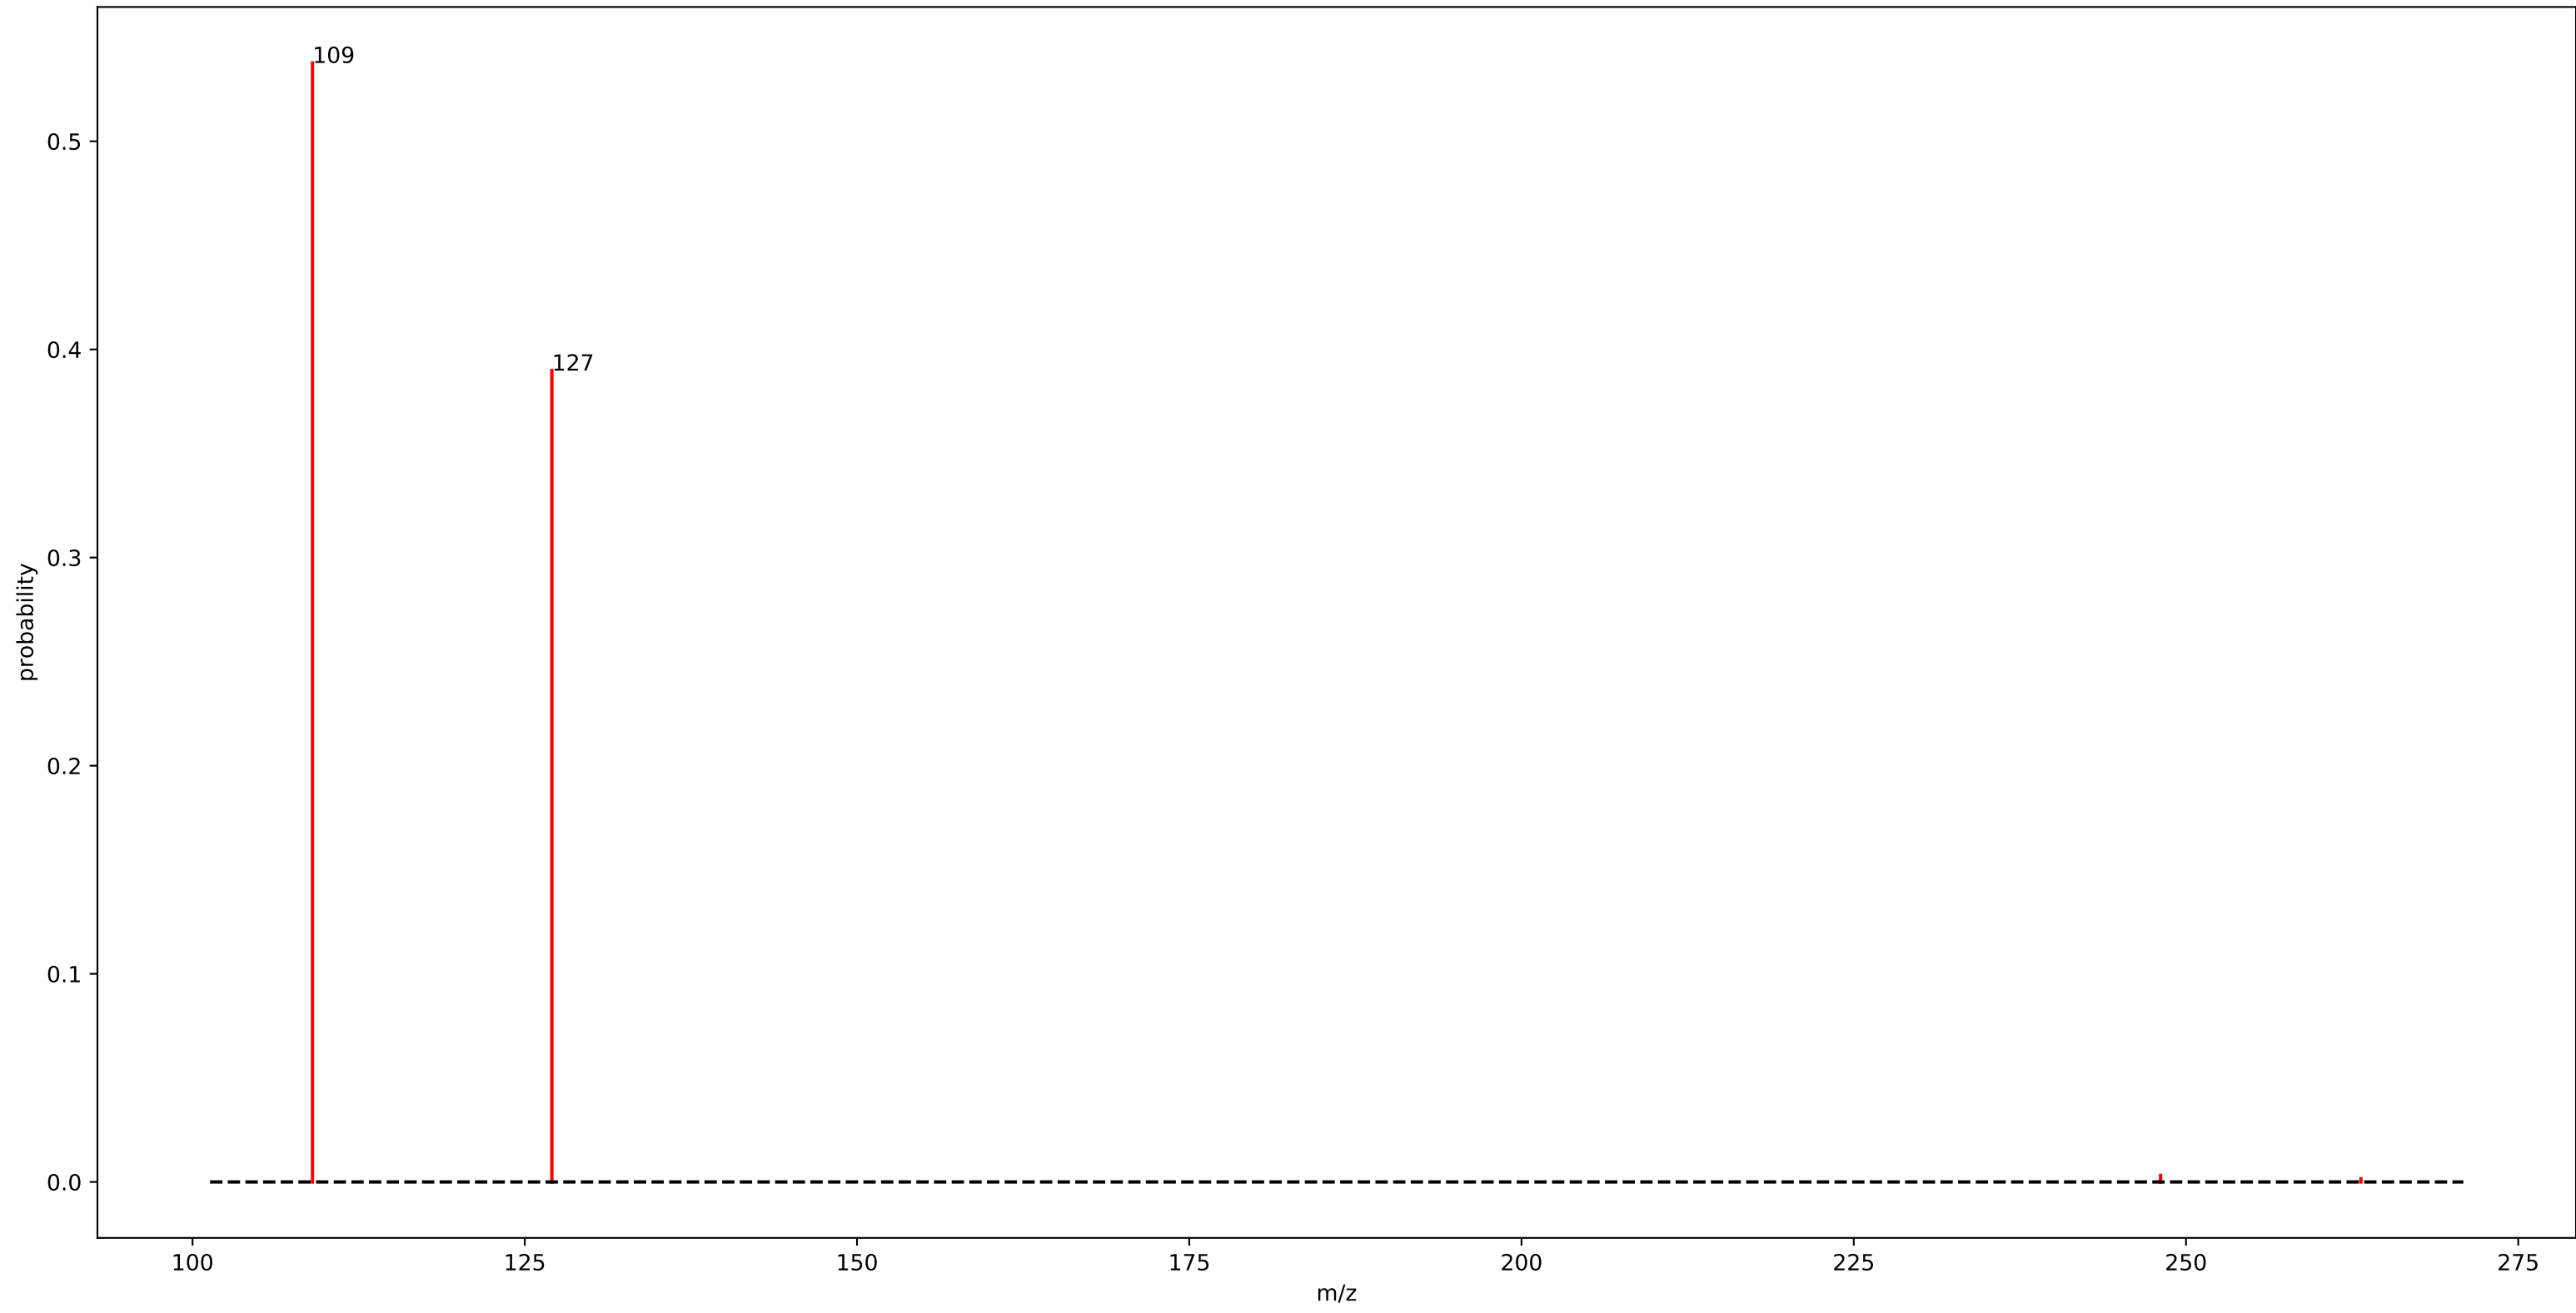

## motif\_644

fragment\_109.0275 : 0.54  
fragment\_127.0375 : 0.39



motif\_643

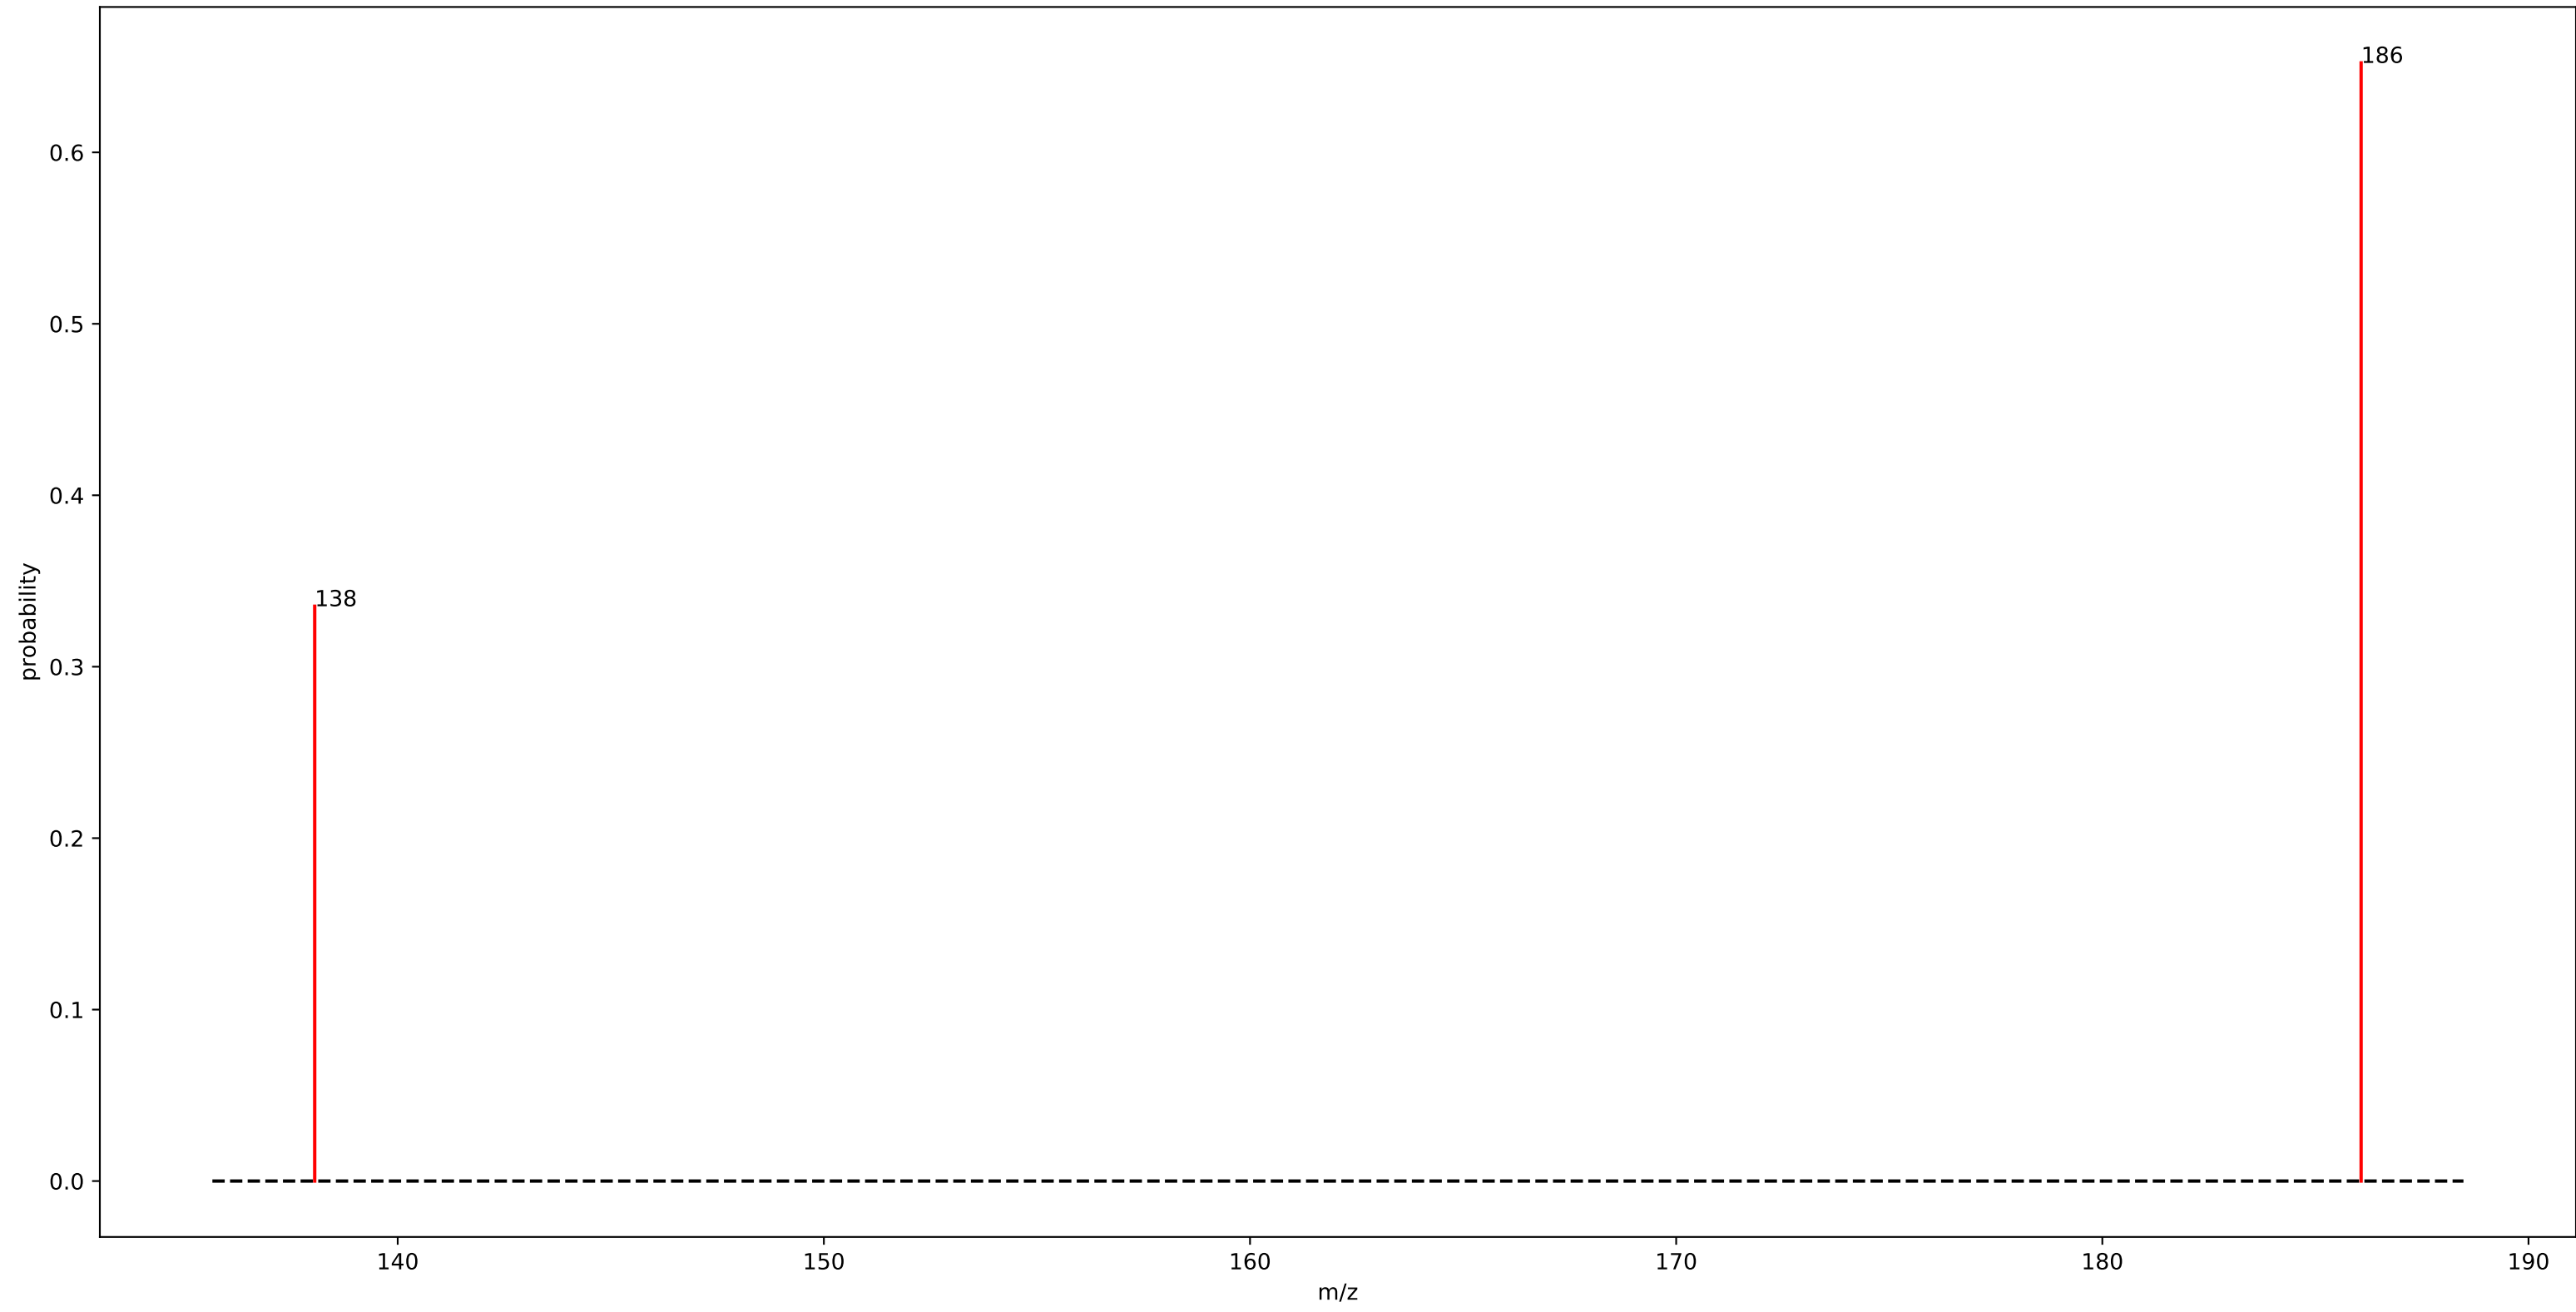

## motif\_643

fragment\_186.0725 : 0.65  
fragment\_138.0525 : 0.34

motif\_642

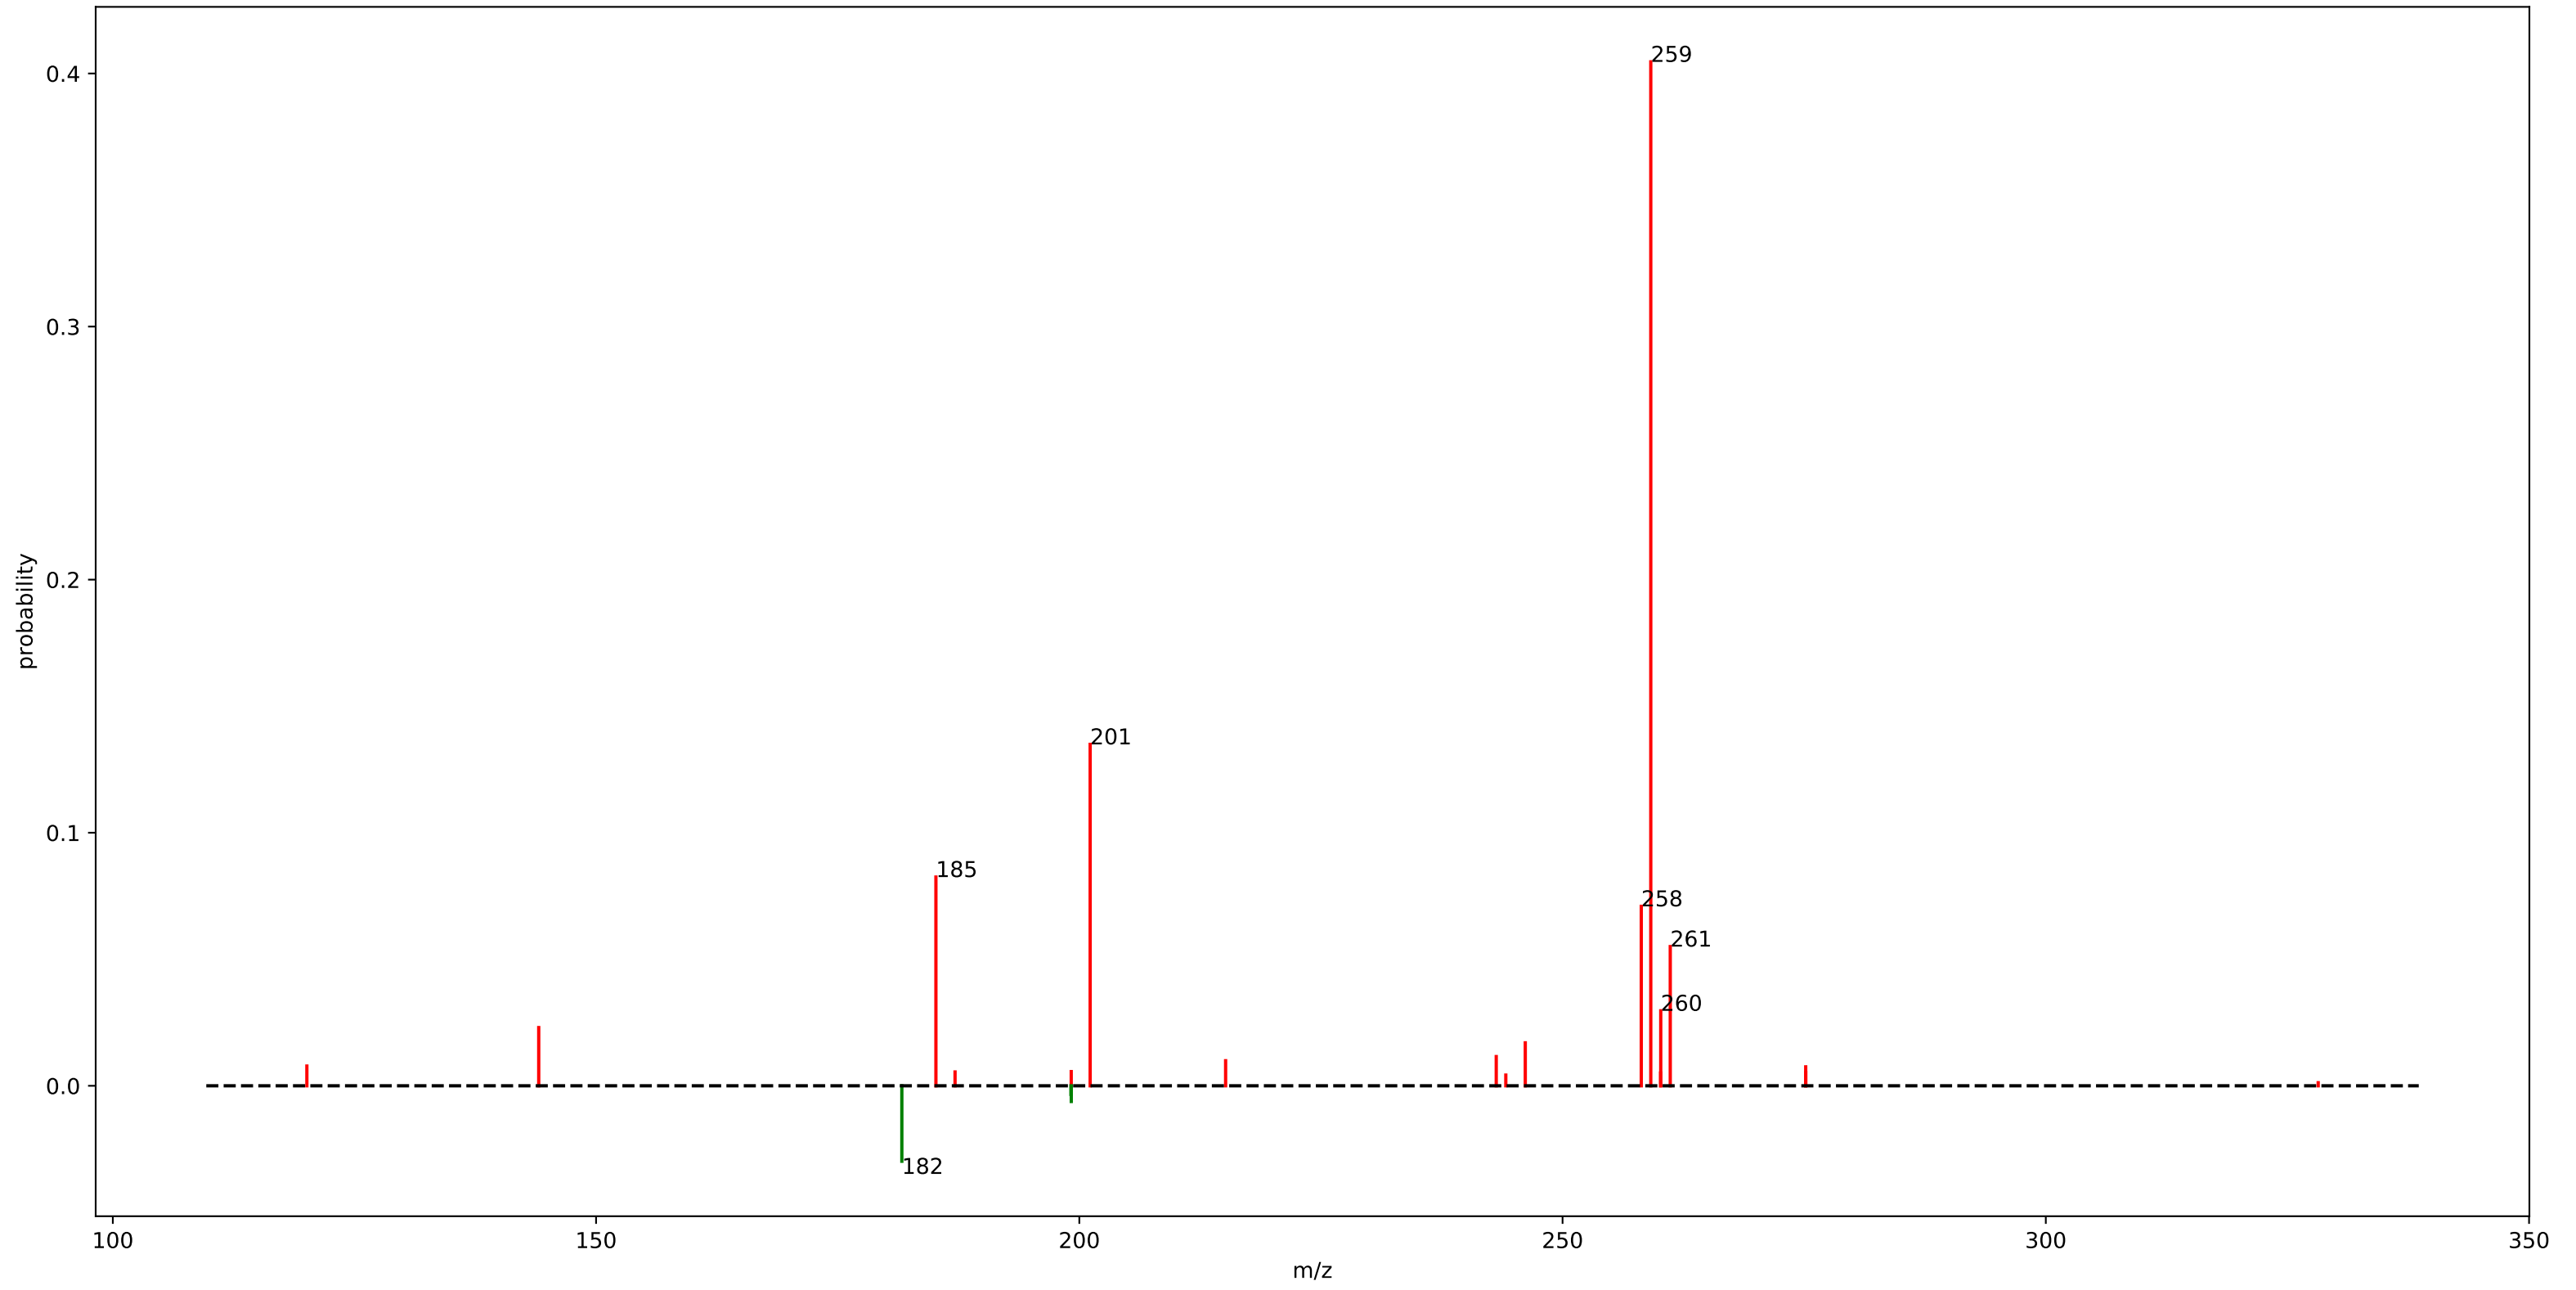

## motif\_642

|                   |        |
|-------------------|--------|
| fragment_259.1275 | : 0.40 |
| fragment_201.1225 | : 0.13 |
| fragment_185.1625 | : 0.08 |
| fragment_258.1425 | : 0.07 |
| fragment_261.1425 | : 0.06 |
| loss_181.6375     | : 0.03 |
| fragment_260.1575 | : 0.03 |
| fragment_144.0675 | : 0.02 |
| fragment_246.1425 | : 0.02 |
| fragment_243.1375 | : 0.01 |
| fragment_215.1375 | : 0.01 |
| fragment_120.0775 | : 0.01 |
| fragment_275.1575 | : 0.01 |
| loss_199.1675     | : 0.01 |
| fragment_199.1625 | : 0.01 |
| fragment_187.1425 | : 0.01 |
| fragment_275.1625 | : 0.01 |
| fragment_260.1425 | : 0.01 |

motif\_568

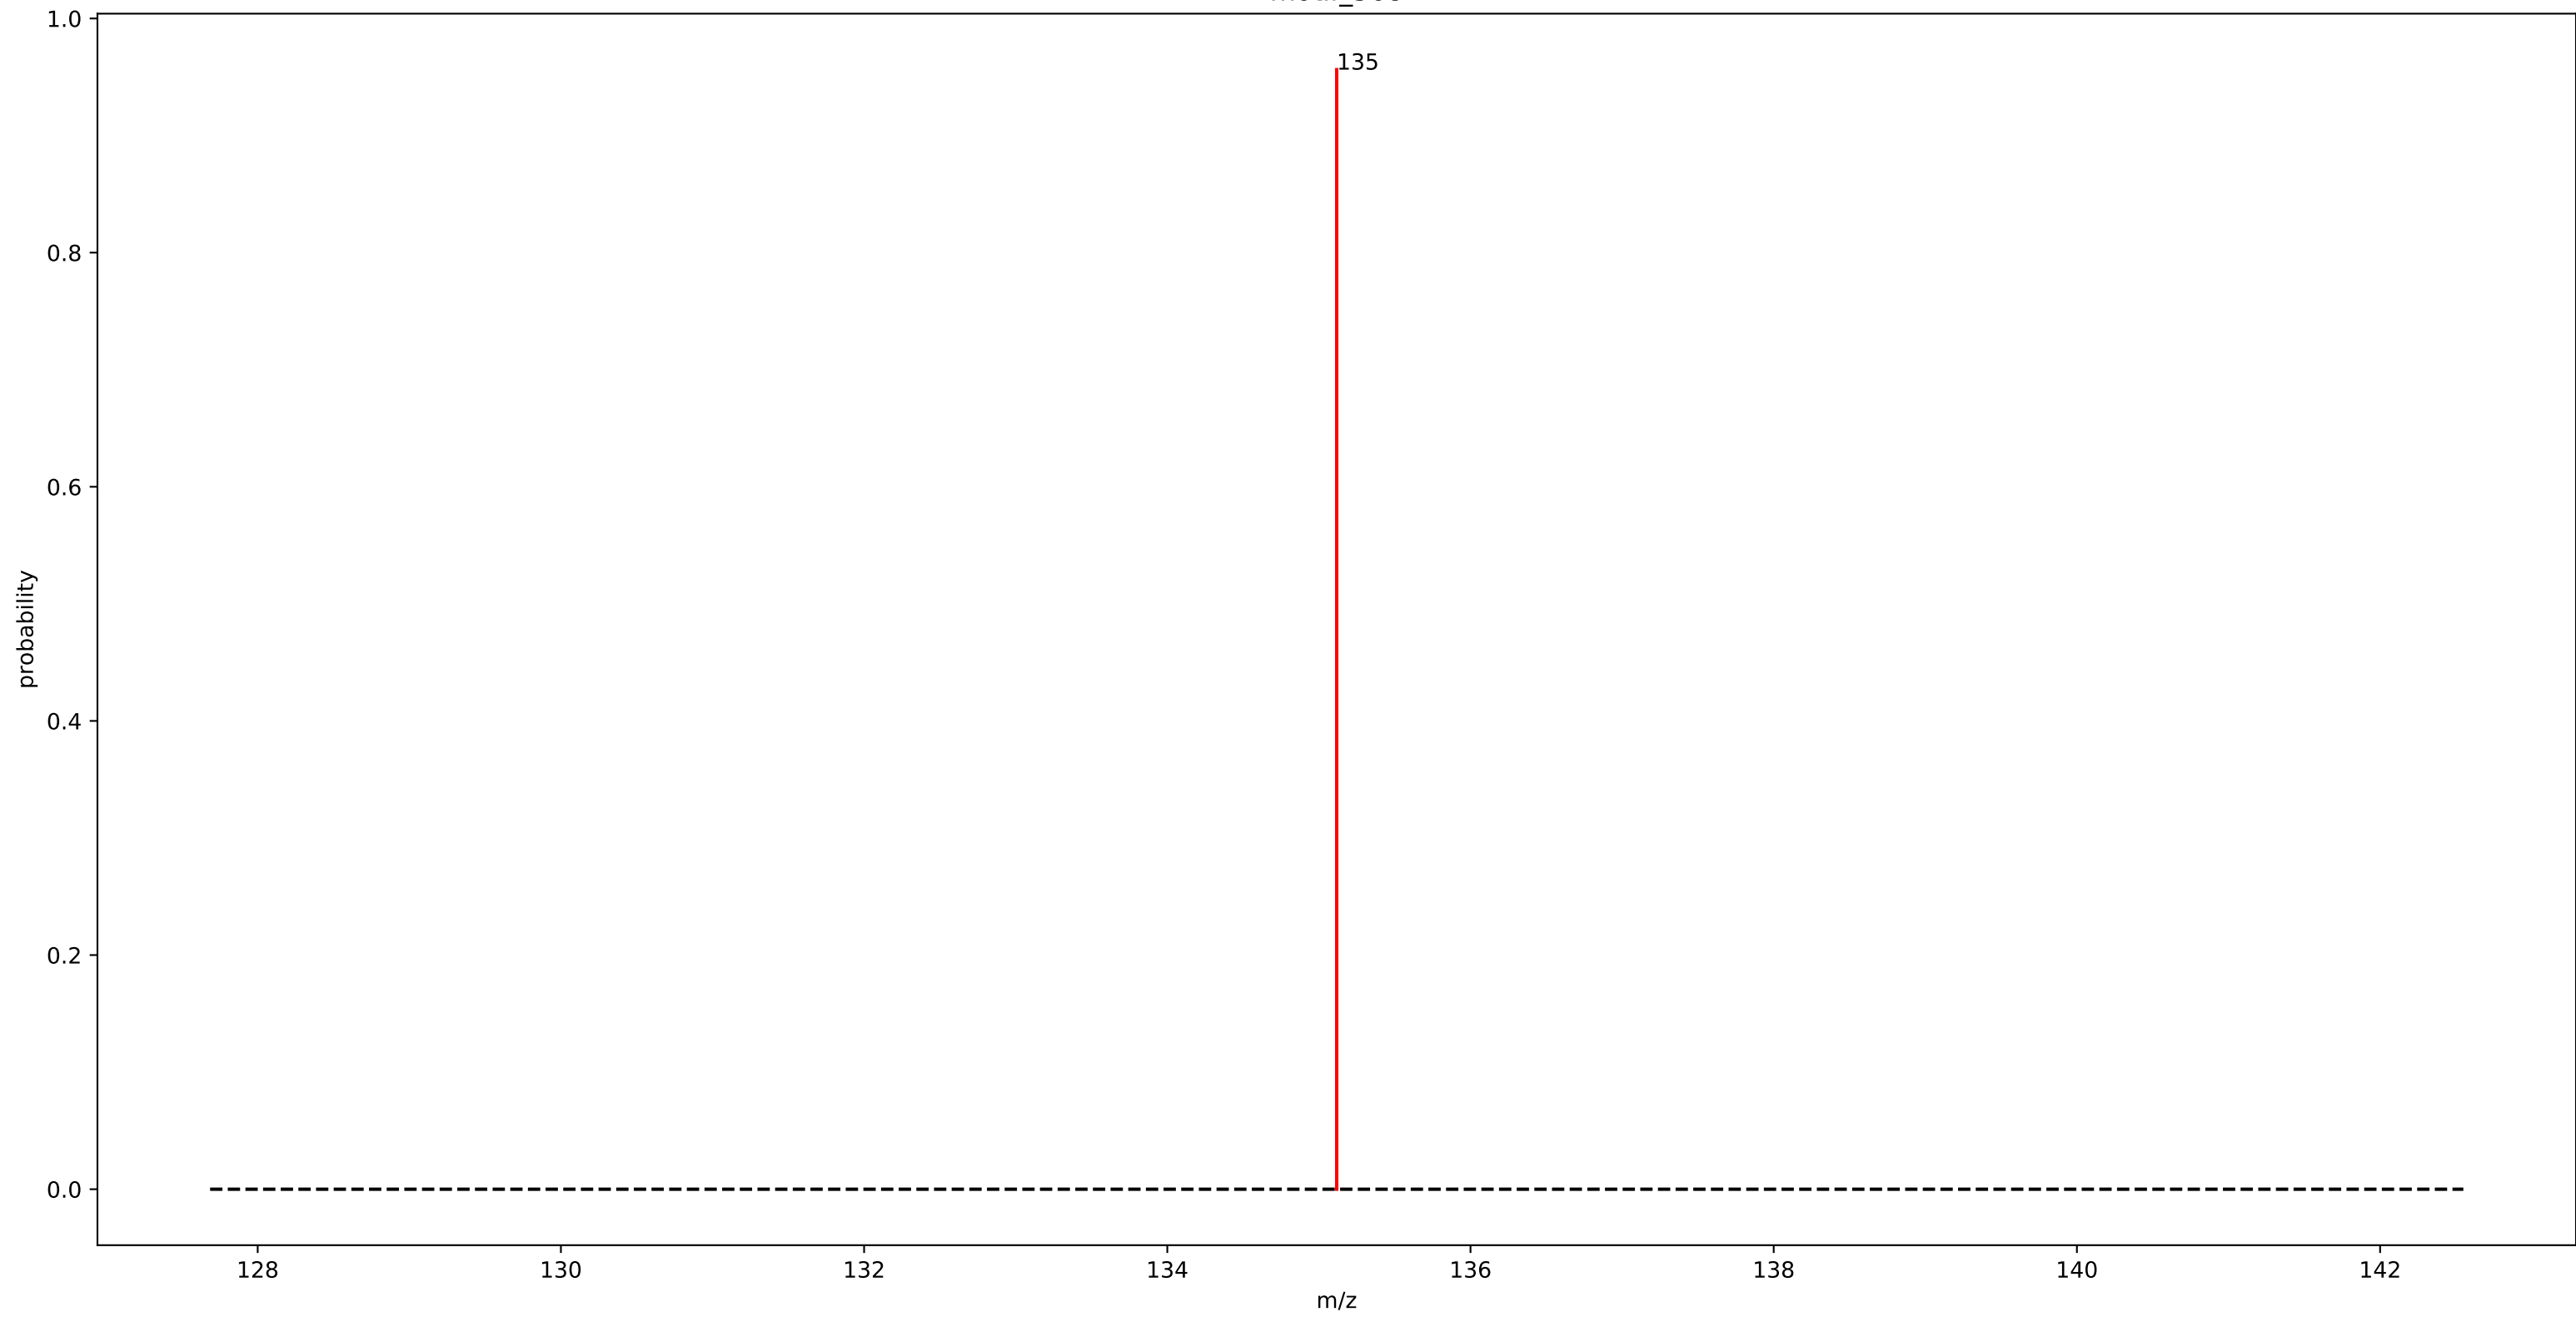

## motif\_568

fragment\_135.1175 : 0.96

motif\_569

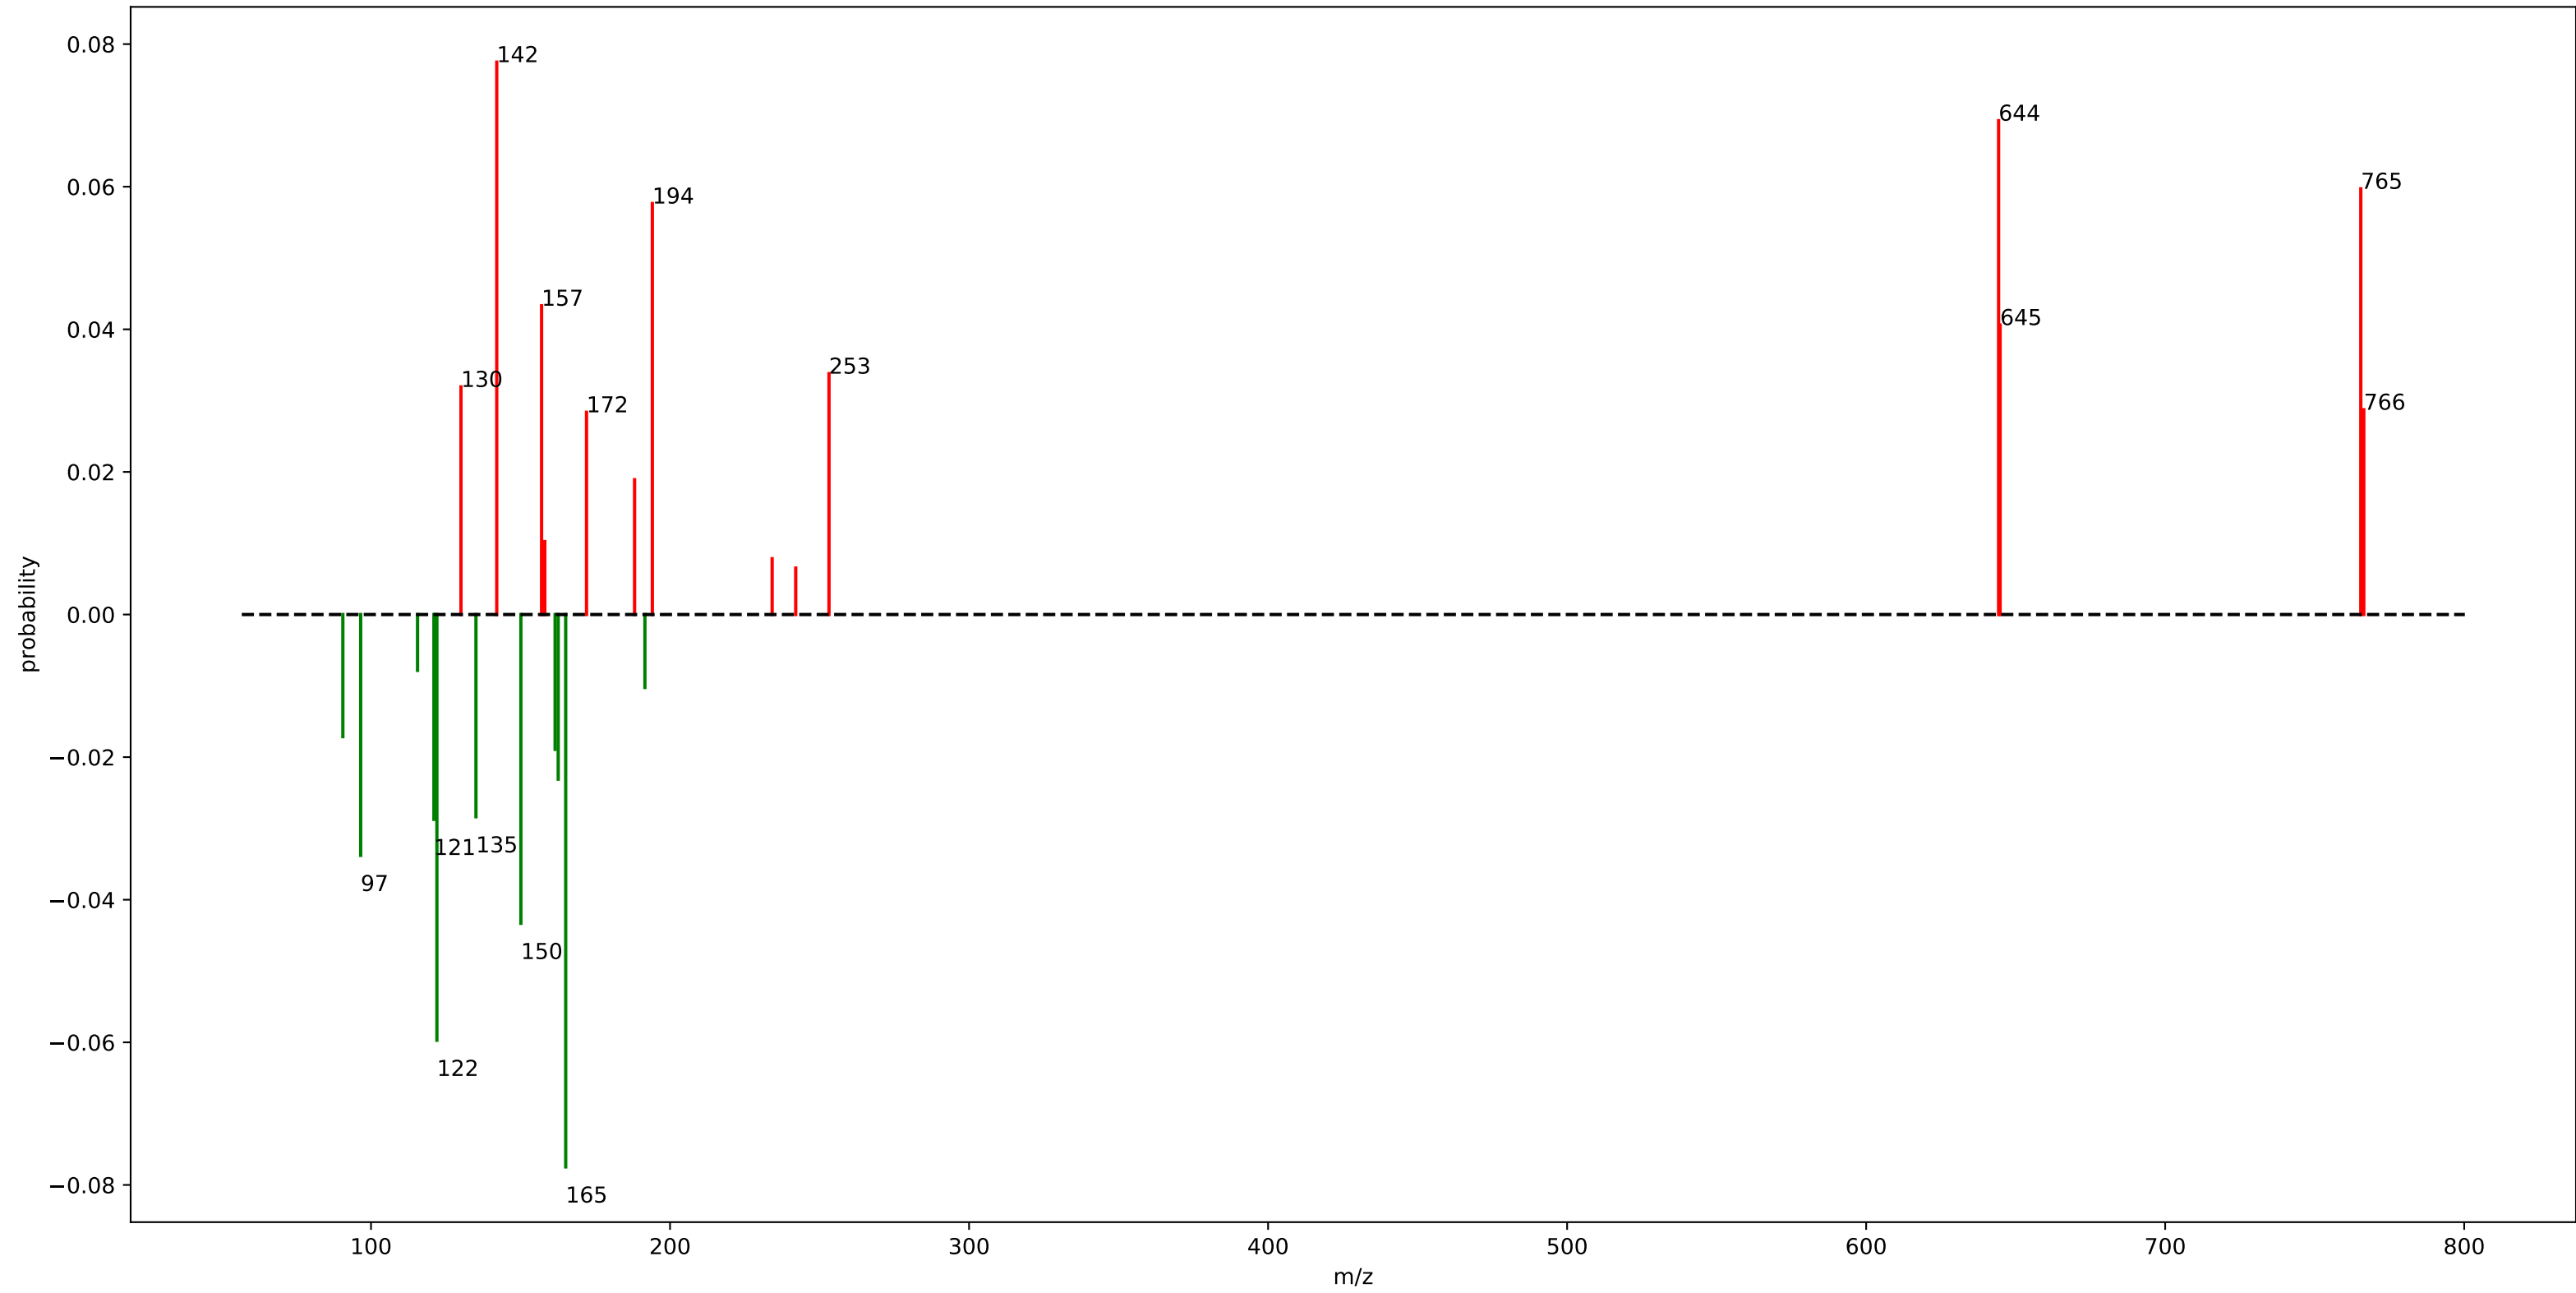

## motif\_569

|                   |        |                   |        |
|-------------------|--------|-------------------|--------|
| loss_165.1075     | : 0.08 | loss_191.5975     | : 0.01 |
| fragment_142.0525 | : 0.08 | fragment_158.1175 | : 0.01 |
| fragment_644.2925 | : 0.07 | fragment_234.1475 | : 0.01 |
| loss_122.0375     | : 0.06 | loss_115.5625     | : 0.01 |
| fragment_765.4225 | : 0.06 | fragment_242.0325 | : 0.01 |
| fragment_194.0825 | : 0.06 |                   |        |
| loss_150.1225     | : 0.04 |                   |        |
| fragment_157.0425 | : 0.04 |                   |        |
| fragment_644.7975 | : 0.04 |                   |        |
| fragment_253.1625 | : 0.03 |                   |        |
| loss_96.5475      | : 0.03 |                   |        |
| fragment_130.0875 | : 0.03 |                   |        |
| loss_121.0375     | : 0.03 |                   |        |
| fragment_766.4225 | : 0.03 |                   |        |
| loss_135.0975     | : 0.03 |                   |        |
| fragment_172.0675 | : 0.03 |                   |        |
| loss_162.6075     | : 0.02 |                   |        |
| loss_161.5725     | : 0.02 |                   |        |
| fragment_188.1425 | : 0.02 |                   |        |
| loss_90.5825      | : 0.02 |                   |        |



euphorbia\_motif\_14.m2m

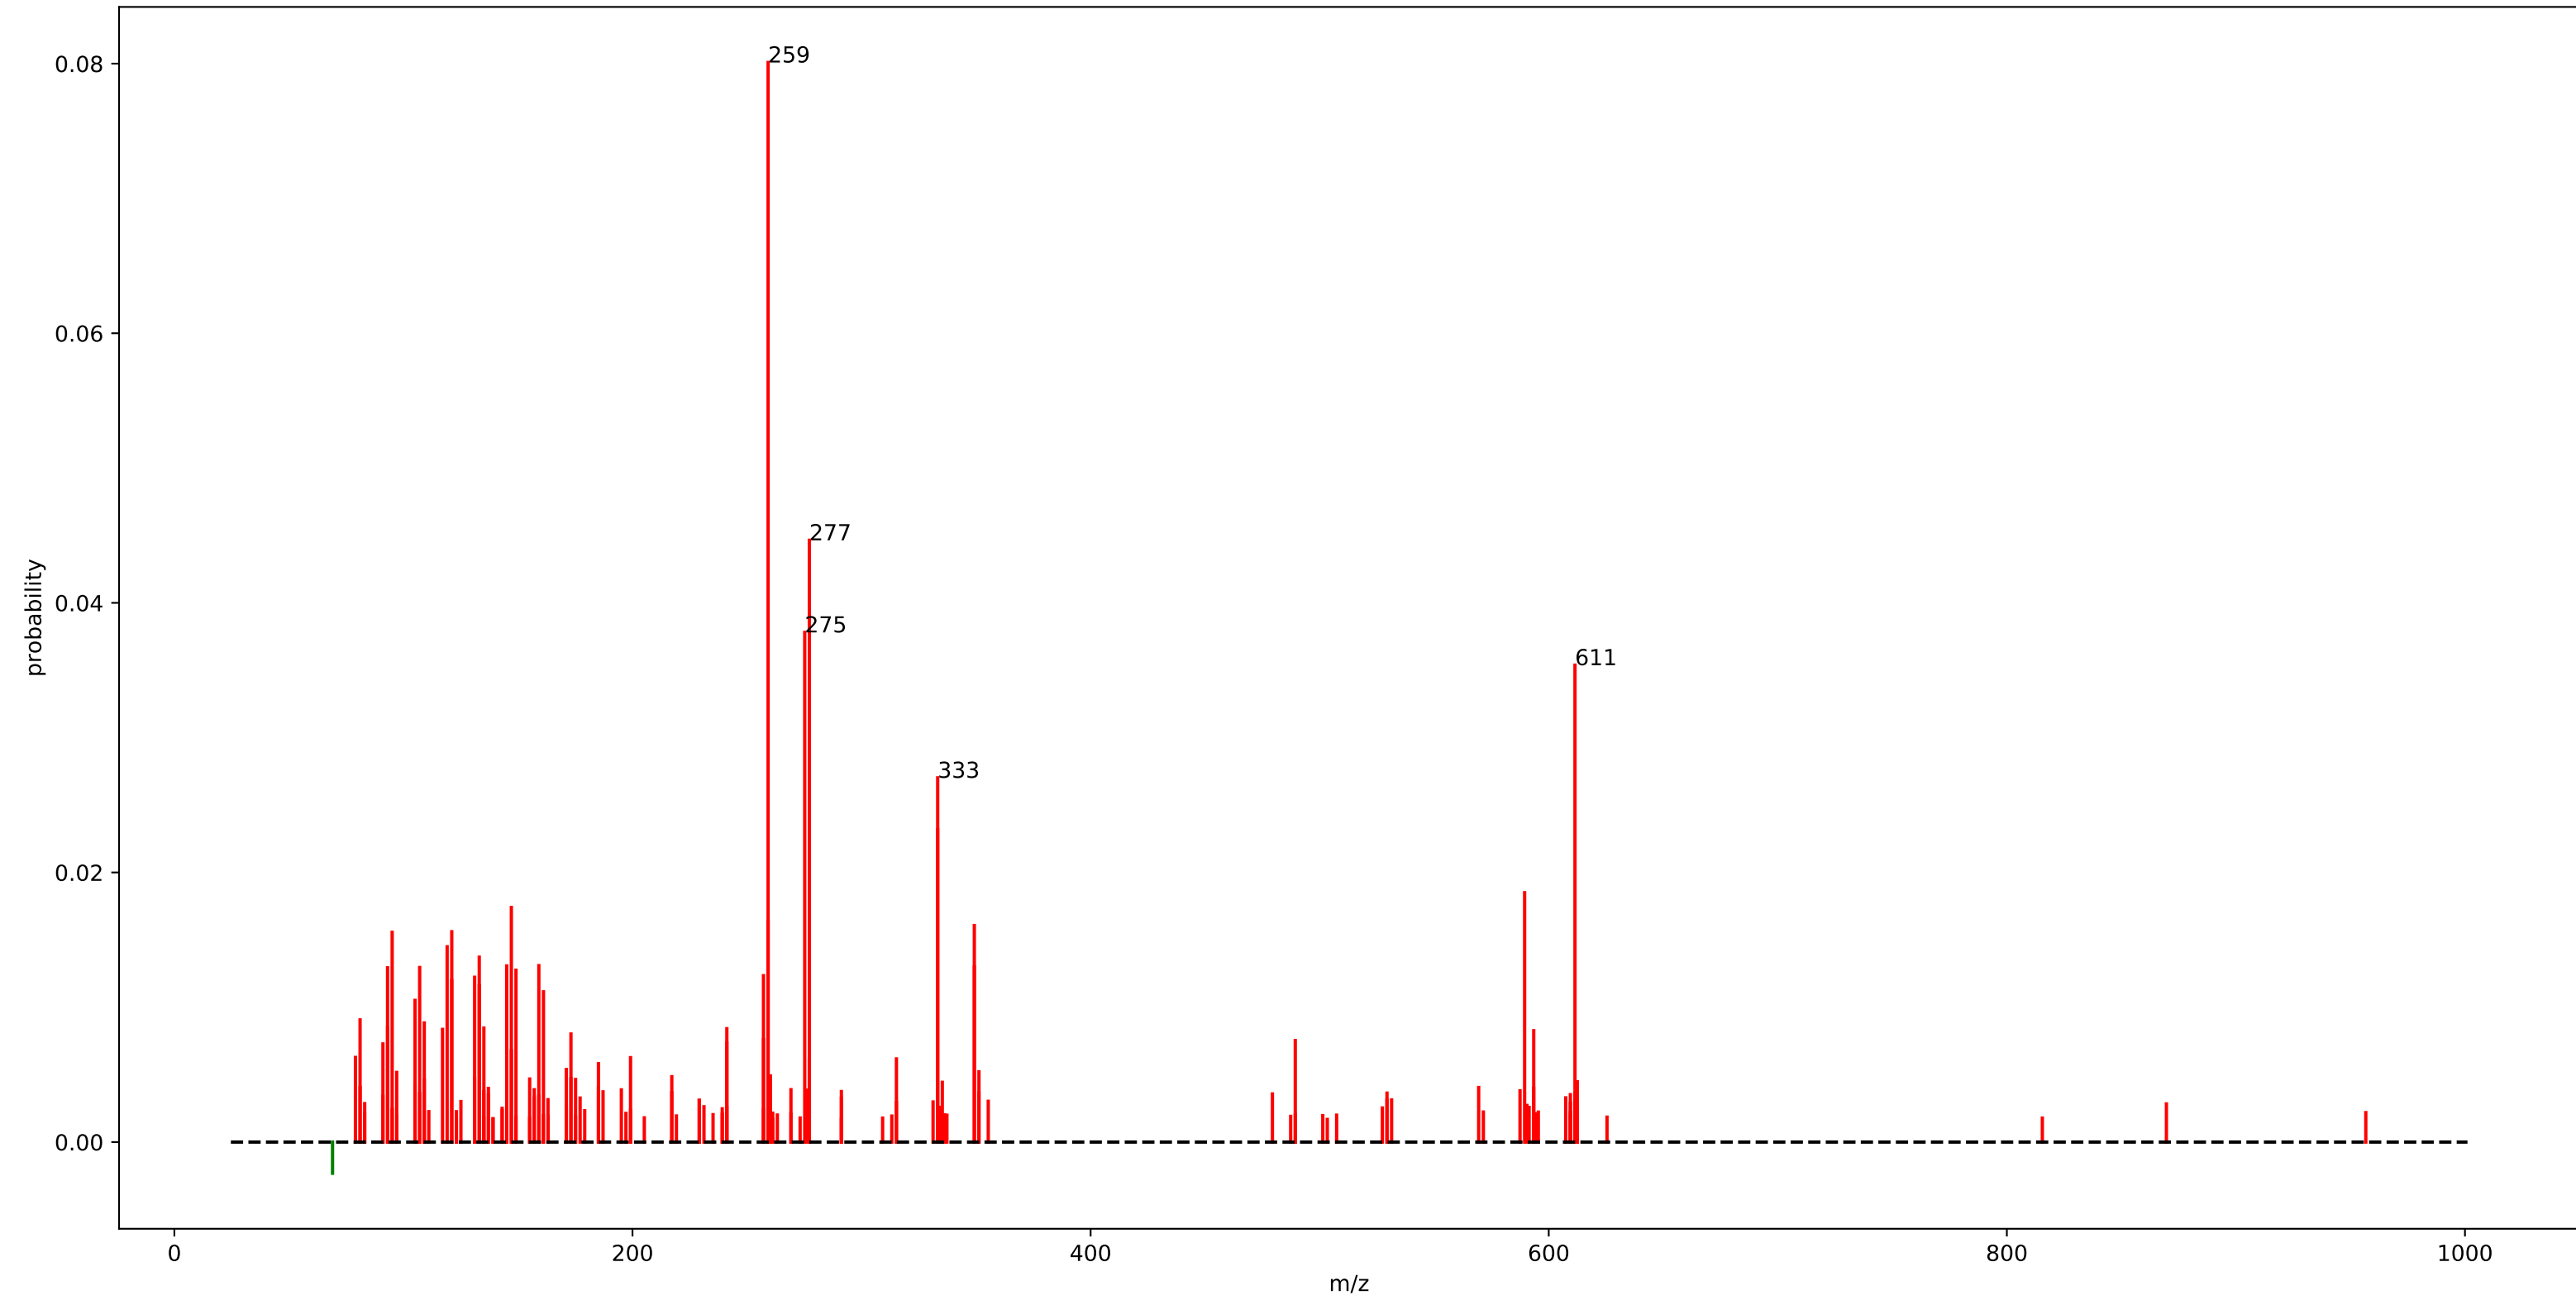

# euphorbia\_motif\_14.m2m

|                   |        |                   |        |                   |        |
|-------------------|--------|-------------------|--------|-------------------|--------|
| fragment_259.2025 | : 0.08 | fragment_257.1875 | : 0.01 | fragment_199.1475 | : 0.01 |
| fragment_277.2125 | : 0.04 | fragment_131.0825 | : 0.01 | fragment_315.2275 | : 0.01 |
| fragment_275.1975 | : 0.04 | fragment_121.1025 | : 0.01 | fragment_277.1775 | : 0.01 |
| fragment_611.4625 | : 0.04 | fragment_133.1025 | : 0.01 | fragment_185.1325 | : 0.01 |
| fragment_333.2375 | : 0.03 | fragment_161.1325 | : 0.01 | fragment_171.1125 | : 0.01 |
| fragment_333.2425 | : 0.02 | fragment_105.0675 | : 0.01 | fragment_351.2525 | : 0.01 |
| fragment_589.4775 | : 0.02 | fragment_81.0675  | : 0.01 | fragment_97.0625  | : 0.01 |
| fragment_147.1175 | : 0.02 | fragment_109.0975 | : 0.01 |                   |        |
| fragment_259.2075 | : 0.02 | fragment_93.0725  | : 0.01 |                   |        |
| fragment_349.2325 | : 0.02 | fragment_135.1175 | : 0.01 |                   |        |
| fragment_121.0975 | : 0.02 | fragment_241.1925 | : 0.01 |                   |        |
| fragment_95.0825  | : 0.02 | fragment_117.0675 | : 0.01 |                   |        |
| fragment_119.0825 | : 0.01 | fragment_593.4525 | : 0.01 |                   |        |
| fragment_133.0975 | : 0.01 | fragment_173.1325 | : 0.01 |                   |        |
| fragment_159.1175 | : 0.01 | fragment_257.1925 | : 0.01 |                   |        |
| fragment_145.0975 | : 0.01 | fragment_489.3525 | : 0.01 |                   |        |
| fragment_349.2375 | : 0.01 | fragment_241.1975 | : 0.01 |                   |        |
| fragment_107.0825 | : 0.01 | fragment_91.0525  | : 0.01 |                   |        |
| fragment_93.0675  | : 0.01 | fragment_147.1125 | : 0.01 |                   |        |
| fragment_149.1325 | : 0.01 | fragment_79.0525  | : 0.01 |                   |        |

rhabdus\_motif\_77.m2m

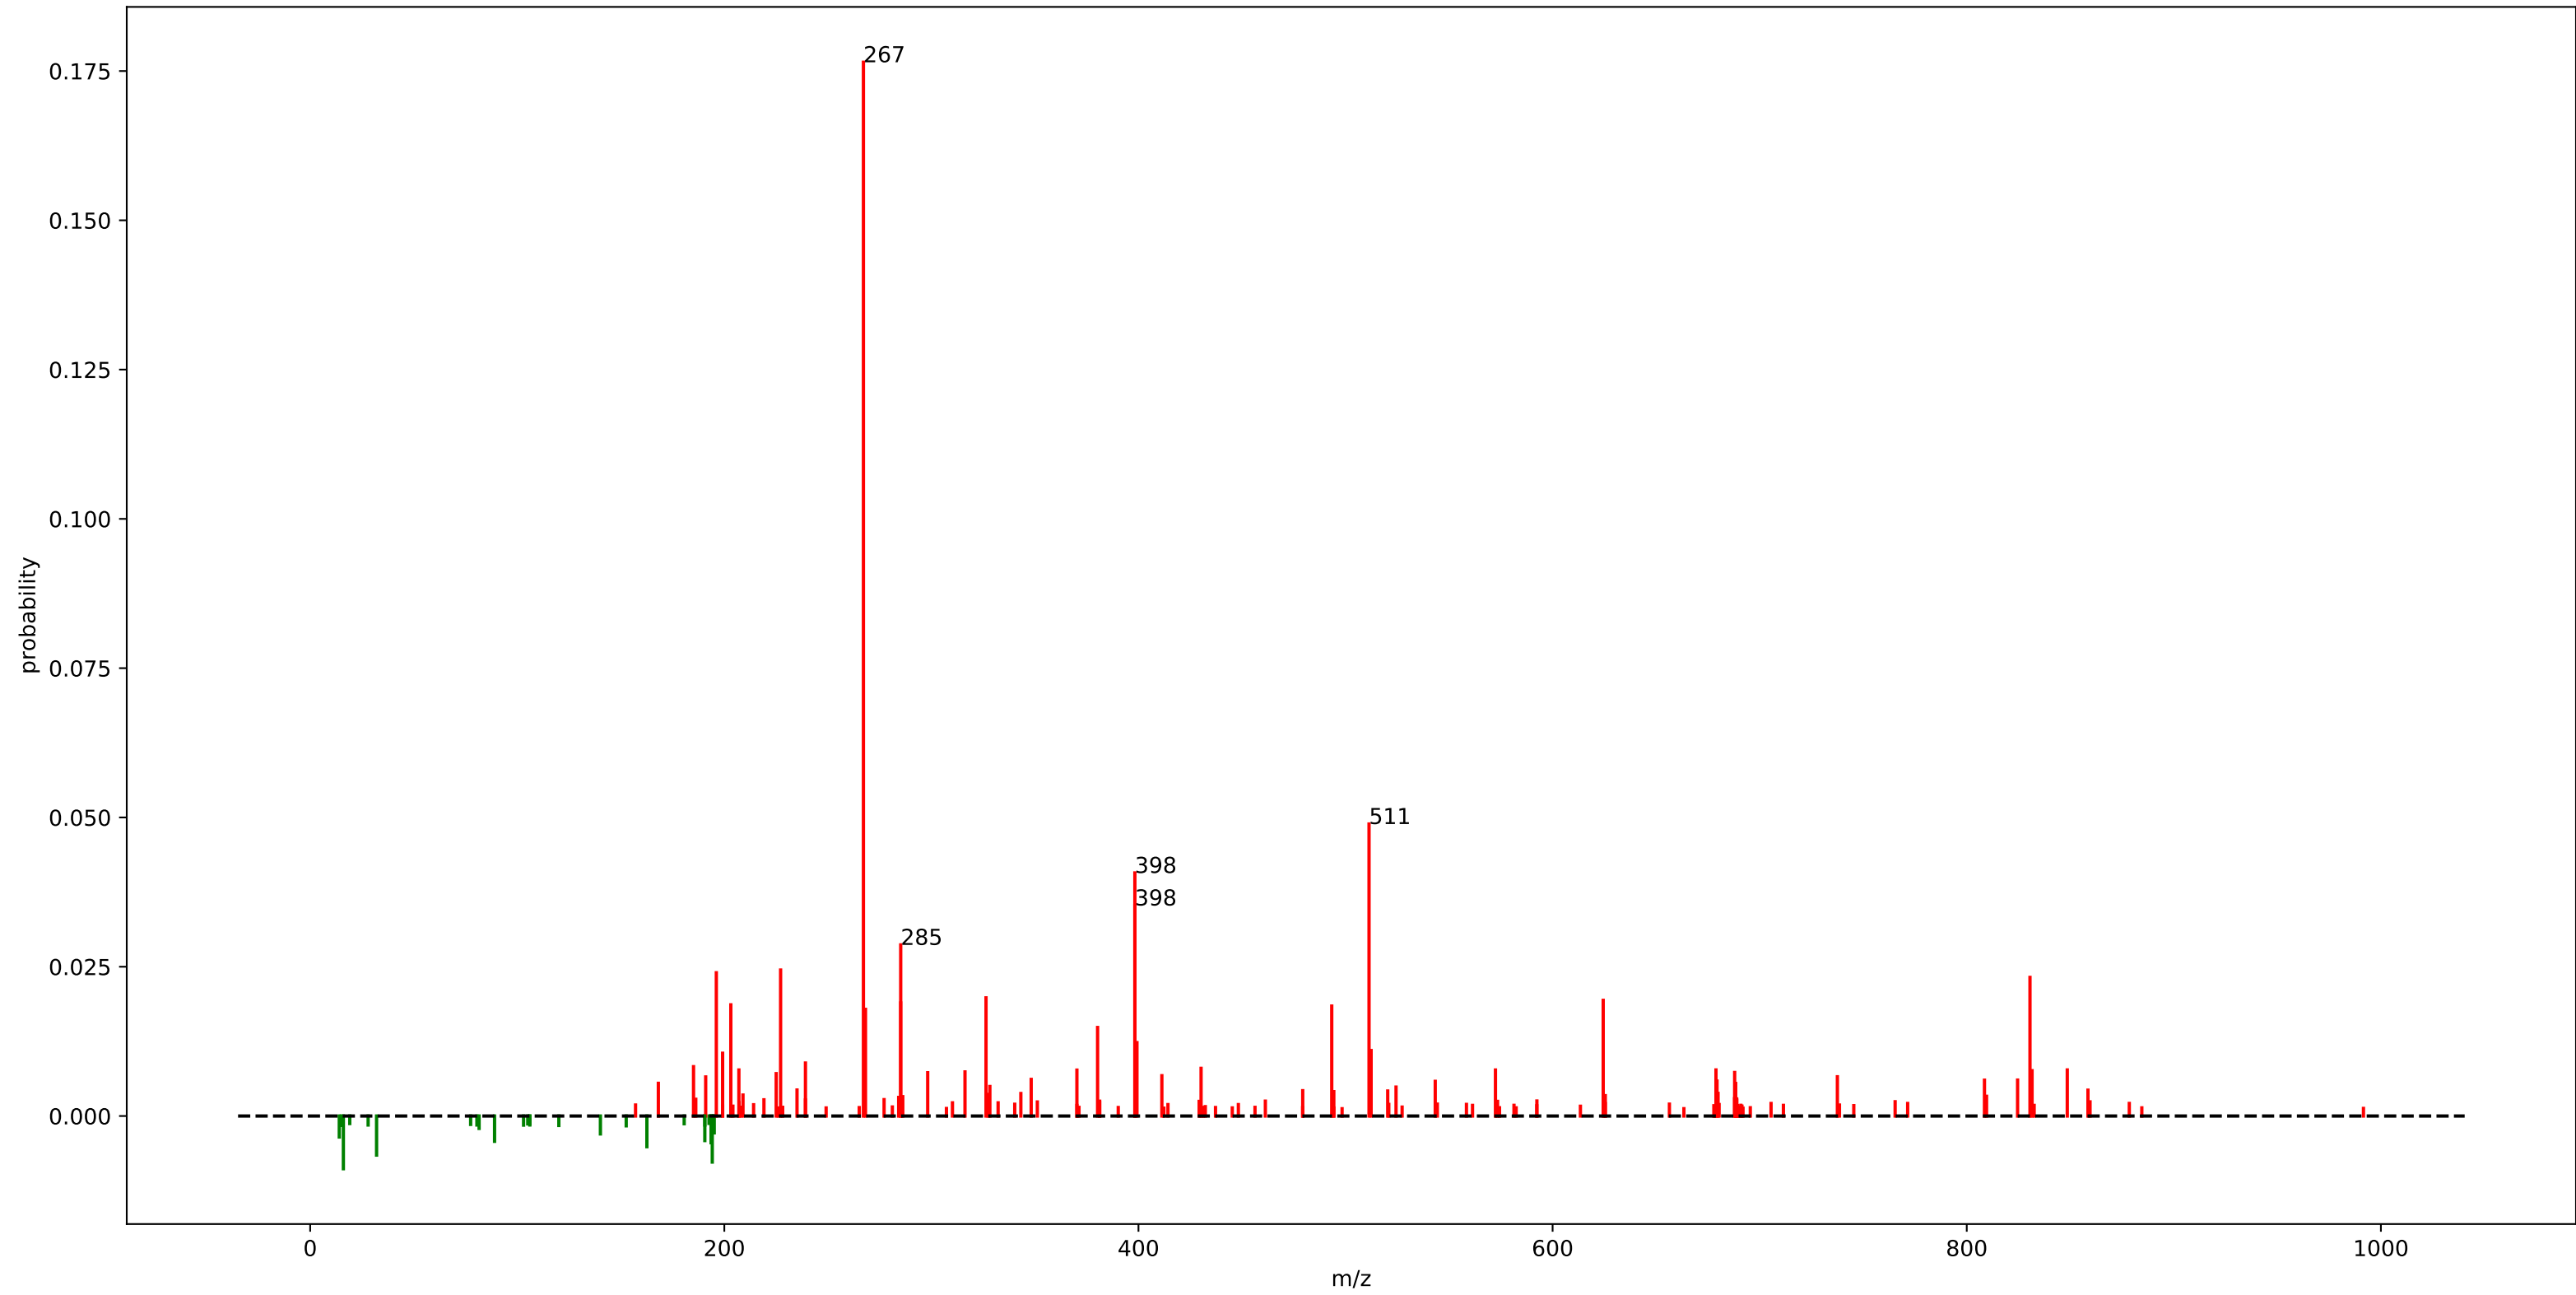

# rhabdus\_motif\_77.m2m

|                   |        |                   |        |                   |        |
|-------------------|--------|-------------------|--------|-------------------|--------|
| fragment_267.1725 | : 0.18 | fragment_185.1275 | : 0.01 | fragment_679.3975 | : 0.01 |
| fragment_511.3475 | : 0.05 | fragment_430.2325 | : 0.01 | fragment_543.3175 | : 0.01 |
| fragment_398.2625 | : 0.04 | fragment_848.5425 | : 0.01 | fragment_168.1375 | : 0.01 |
| fragment_398.2675 | : 0.04 | fragment_678.8925 | : 0.01 | fragment_688.4175 | : 0.01 |
| fragment_285.1825 | : 0.03 | loss_194.1775     | : 0.01 | loss_162.6025     | : 0.01 |
| fragment_227.1775 | : 0.02 | fragment_207.0325 | : 0.01 |                   |        |
| fragment_196.1325 | : 0.02 | fragment_572.4025 | : 0.01 |                   |        |
| fragment_830.5325 | : 0.02 | fragment_370.2675 | : 0.01 |                   |        |
| fragment_326.3775 | : 0.02 | fragment_831.5375 | : 0.01 |                   |        |
| fragment_624.4325 | : 0.02 | fragment_316.2225 | : 0.01 |                   |        |
| fragment_285.1775 | : 0.02 | fragment_687.9125 | : 0.01 |                   |        |
| fragment_203.1375 | : 0.02 | fragment_298.2125 | : 0.01 |                   |        |
| fragment_493.3375 | : 0.02 | fragment_225.0475 | : 0.01 |                   |        |
| fragment_268.1725 | : 0.02 | fragment_411.2975 | : 0.01 |                   |        |
| fragment_380.2575 | : 0.01 | fragment_737.5175 | : 0.01 |                   |        |
| fragment_399.2675 | : 0.01 | loss_32.0625      | : 0.01 |                   |        |
| fragment_512.3525 | : 0.01 | fragment_191.0025 | : 0.01 |                   |        |
| fragment_199.1775 | : 0.01 | fragment_348.1925 | : 0.01 |                   |        |
| fragment_239.1775 | : 0.01 | fragment_824.5475 | : 0.01 |                   |        |
| loss_16.0325      | : 0.01 | fragment_808.5525 | : 0.01 |                   |        |

StrepSalini\_motif\_241.m2m

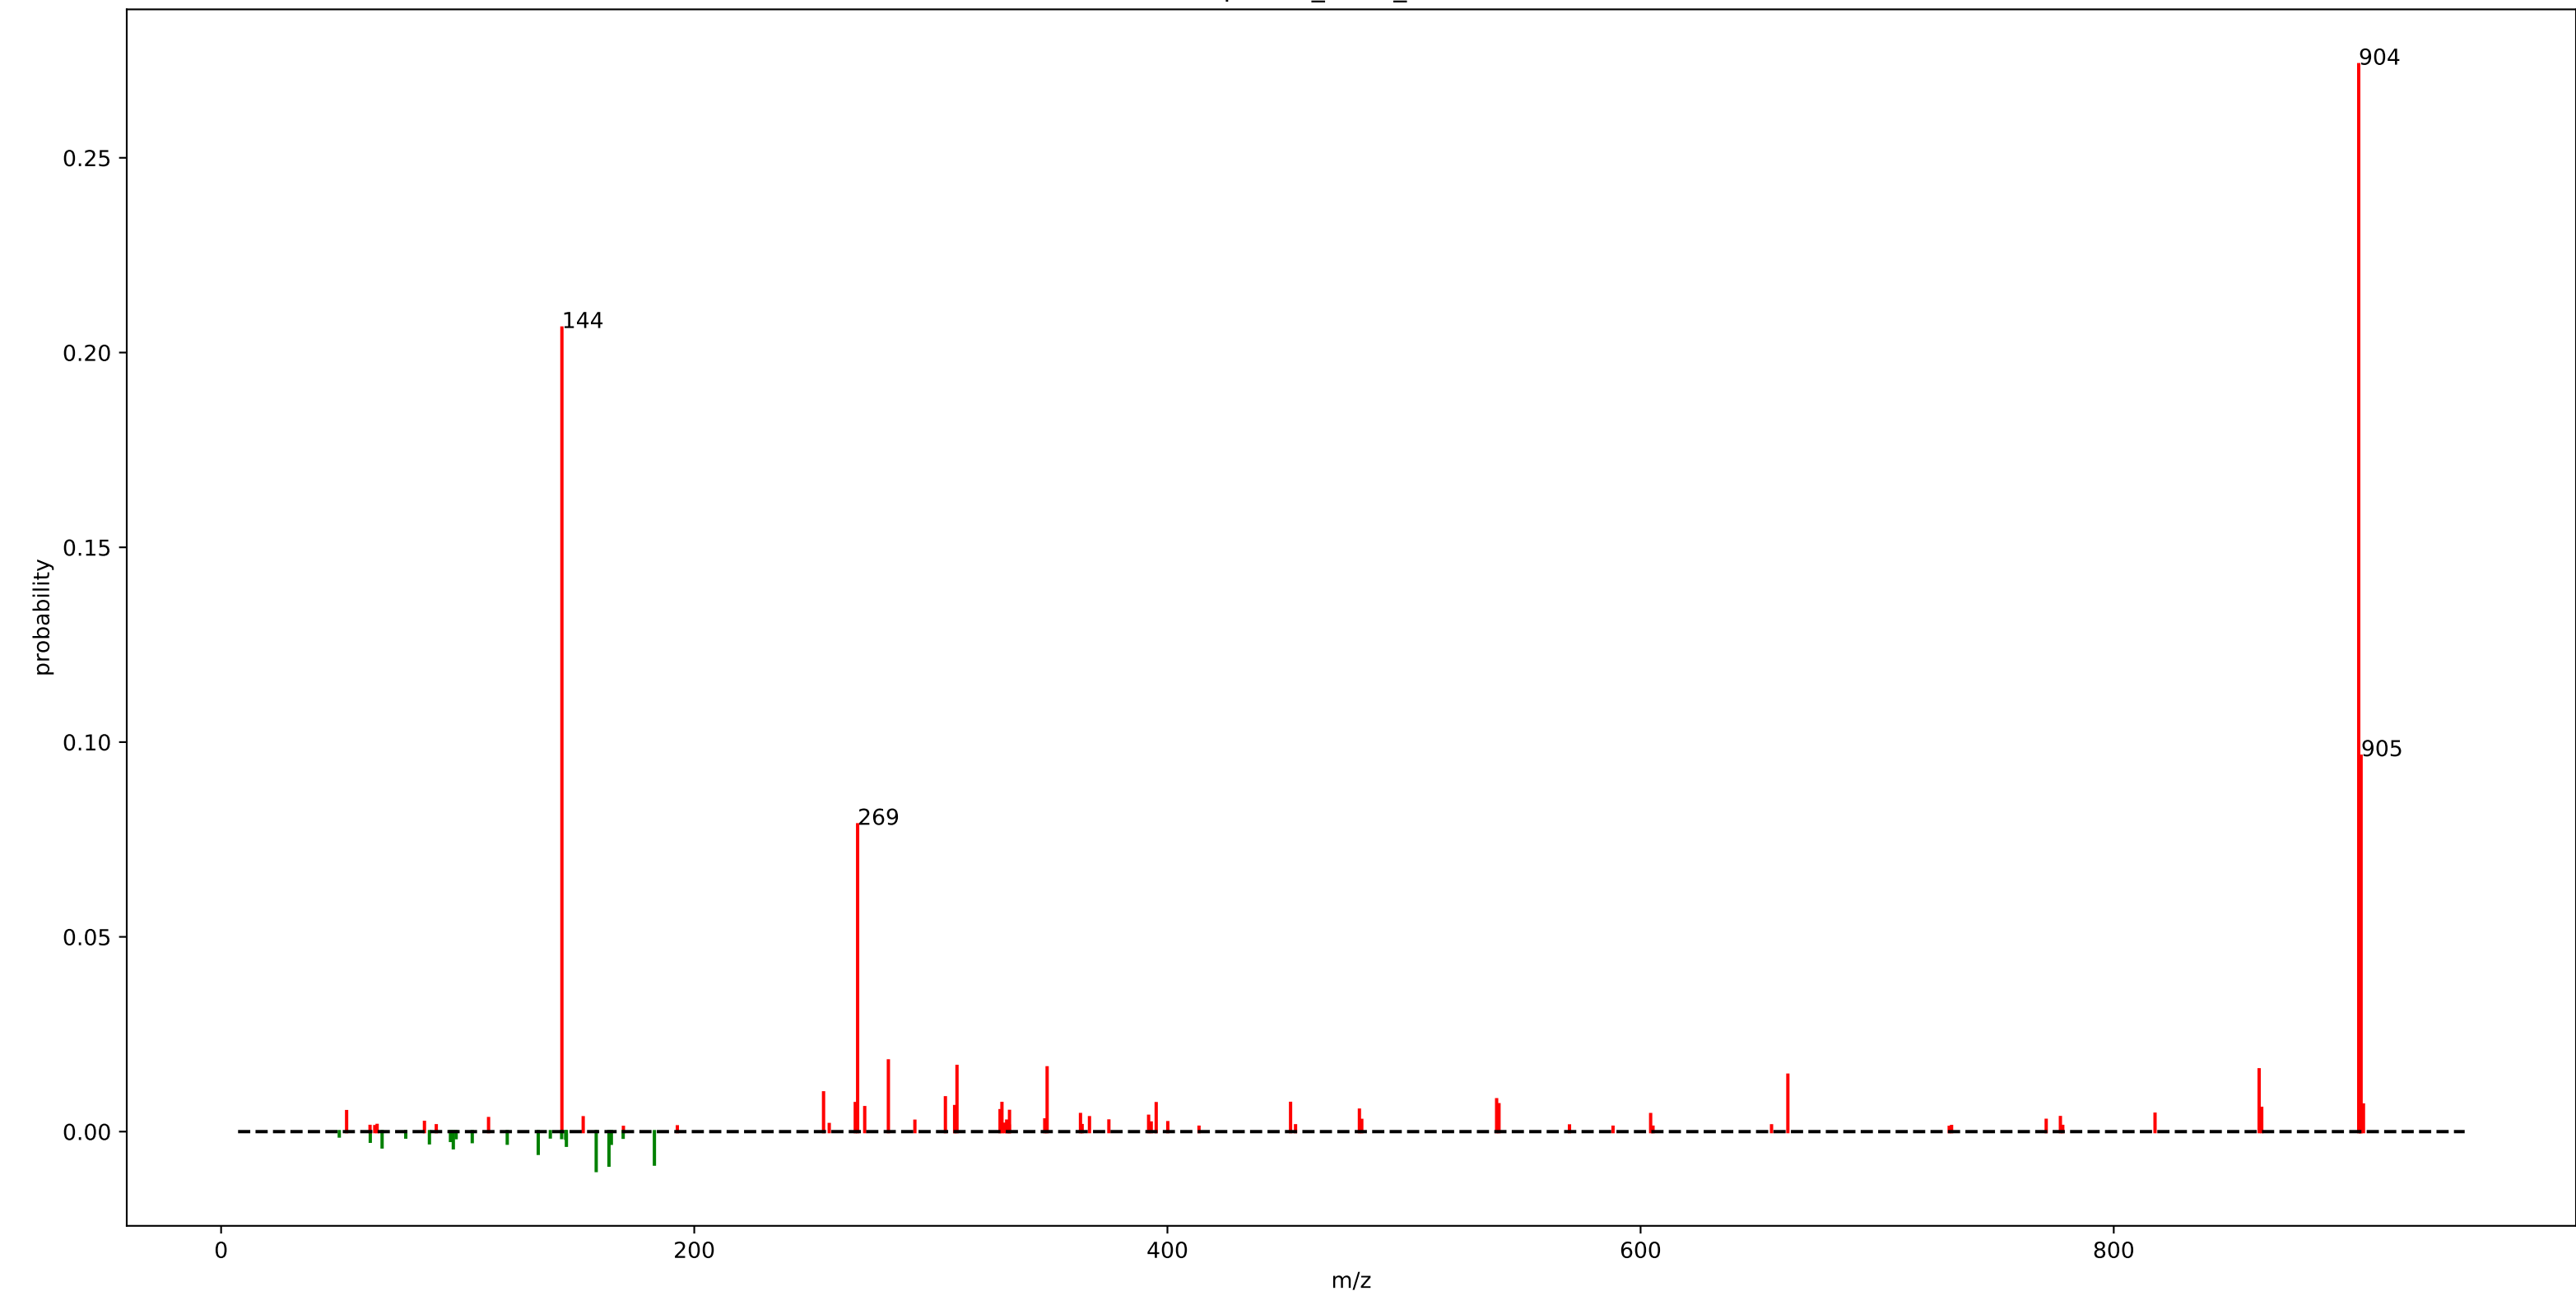

## StrepSalini\_motif\_241.m2m

|                   |        |                   |        |
|-------------------|--------|-------------------|--------|
| fragment_903.5500 | : 0.27 | fragment_905.5500 | : 0.01 |
| fragment_144.0500 | : 0.21 | fragment_310.0500 | : 0.01 |
| fragment_904.5500 | : 0.10 | fragment_272.0500 | : 0.01 |
| fragment_269.0500 | : 0.08 | fragment_862.5500 | : 0.01 |
| fragment_282.0500 | : 0.02 | loss_134.0500     | : 0.01 |
| fragment_311.0500 | : 0.02 | fragment_481.1500 | : 0.01 |
| fragment_349.1500 | : 0.02 | fragment_329.2500 | : 0.01 |
| fragment_861.4525 | : 0.02 | fragment_333.2500 | : 0.01 |
| fragment_662.2500 | : 0.01 | fragment_53.0500  | : 0.01 |
| loss_158.5500     | : 0.01 |                   |        |
| fragment_254.6500 | : 0.01 |                   |        |
| fragment_306.1500 | : 0.01 |                   |        |
| loss_163.9500     | : 0.01 |                   |        |
| loss_183.1525     | : 0.01 |                   |        |
| fragment_539.1500 | : 0.01 |                   |        |
| fragment_452.0500 | : 0.01 |                   |        |
| fragment_330.0500 | : 0.01 |                   |        |
| fragment_268.0500 | : 0.01 |                   |        |
| fragment_395.2500 | : 0.01 |                   |        |
| fragment_540.1500 | : 0.01 |                   |        |

StrepSalini\_motif\_99.m2m

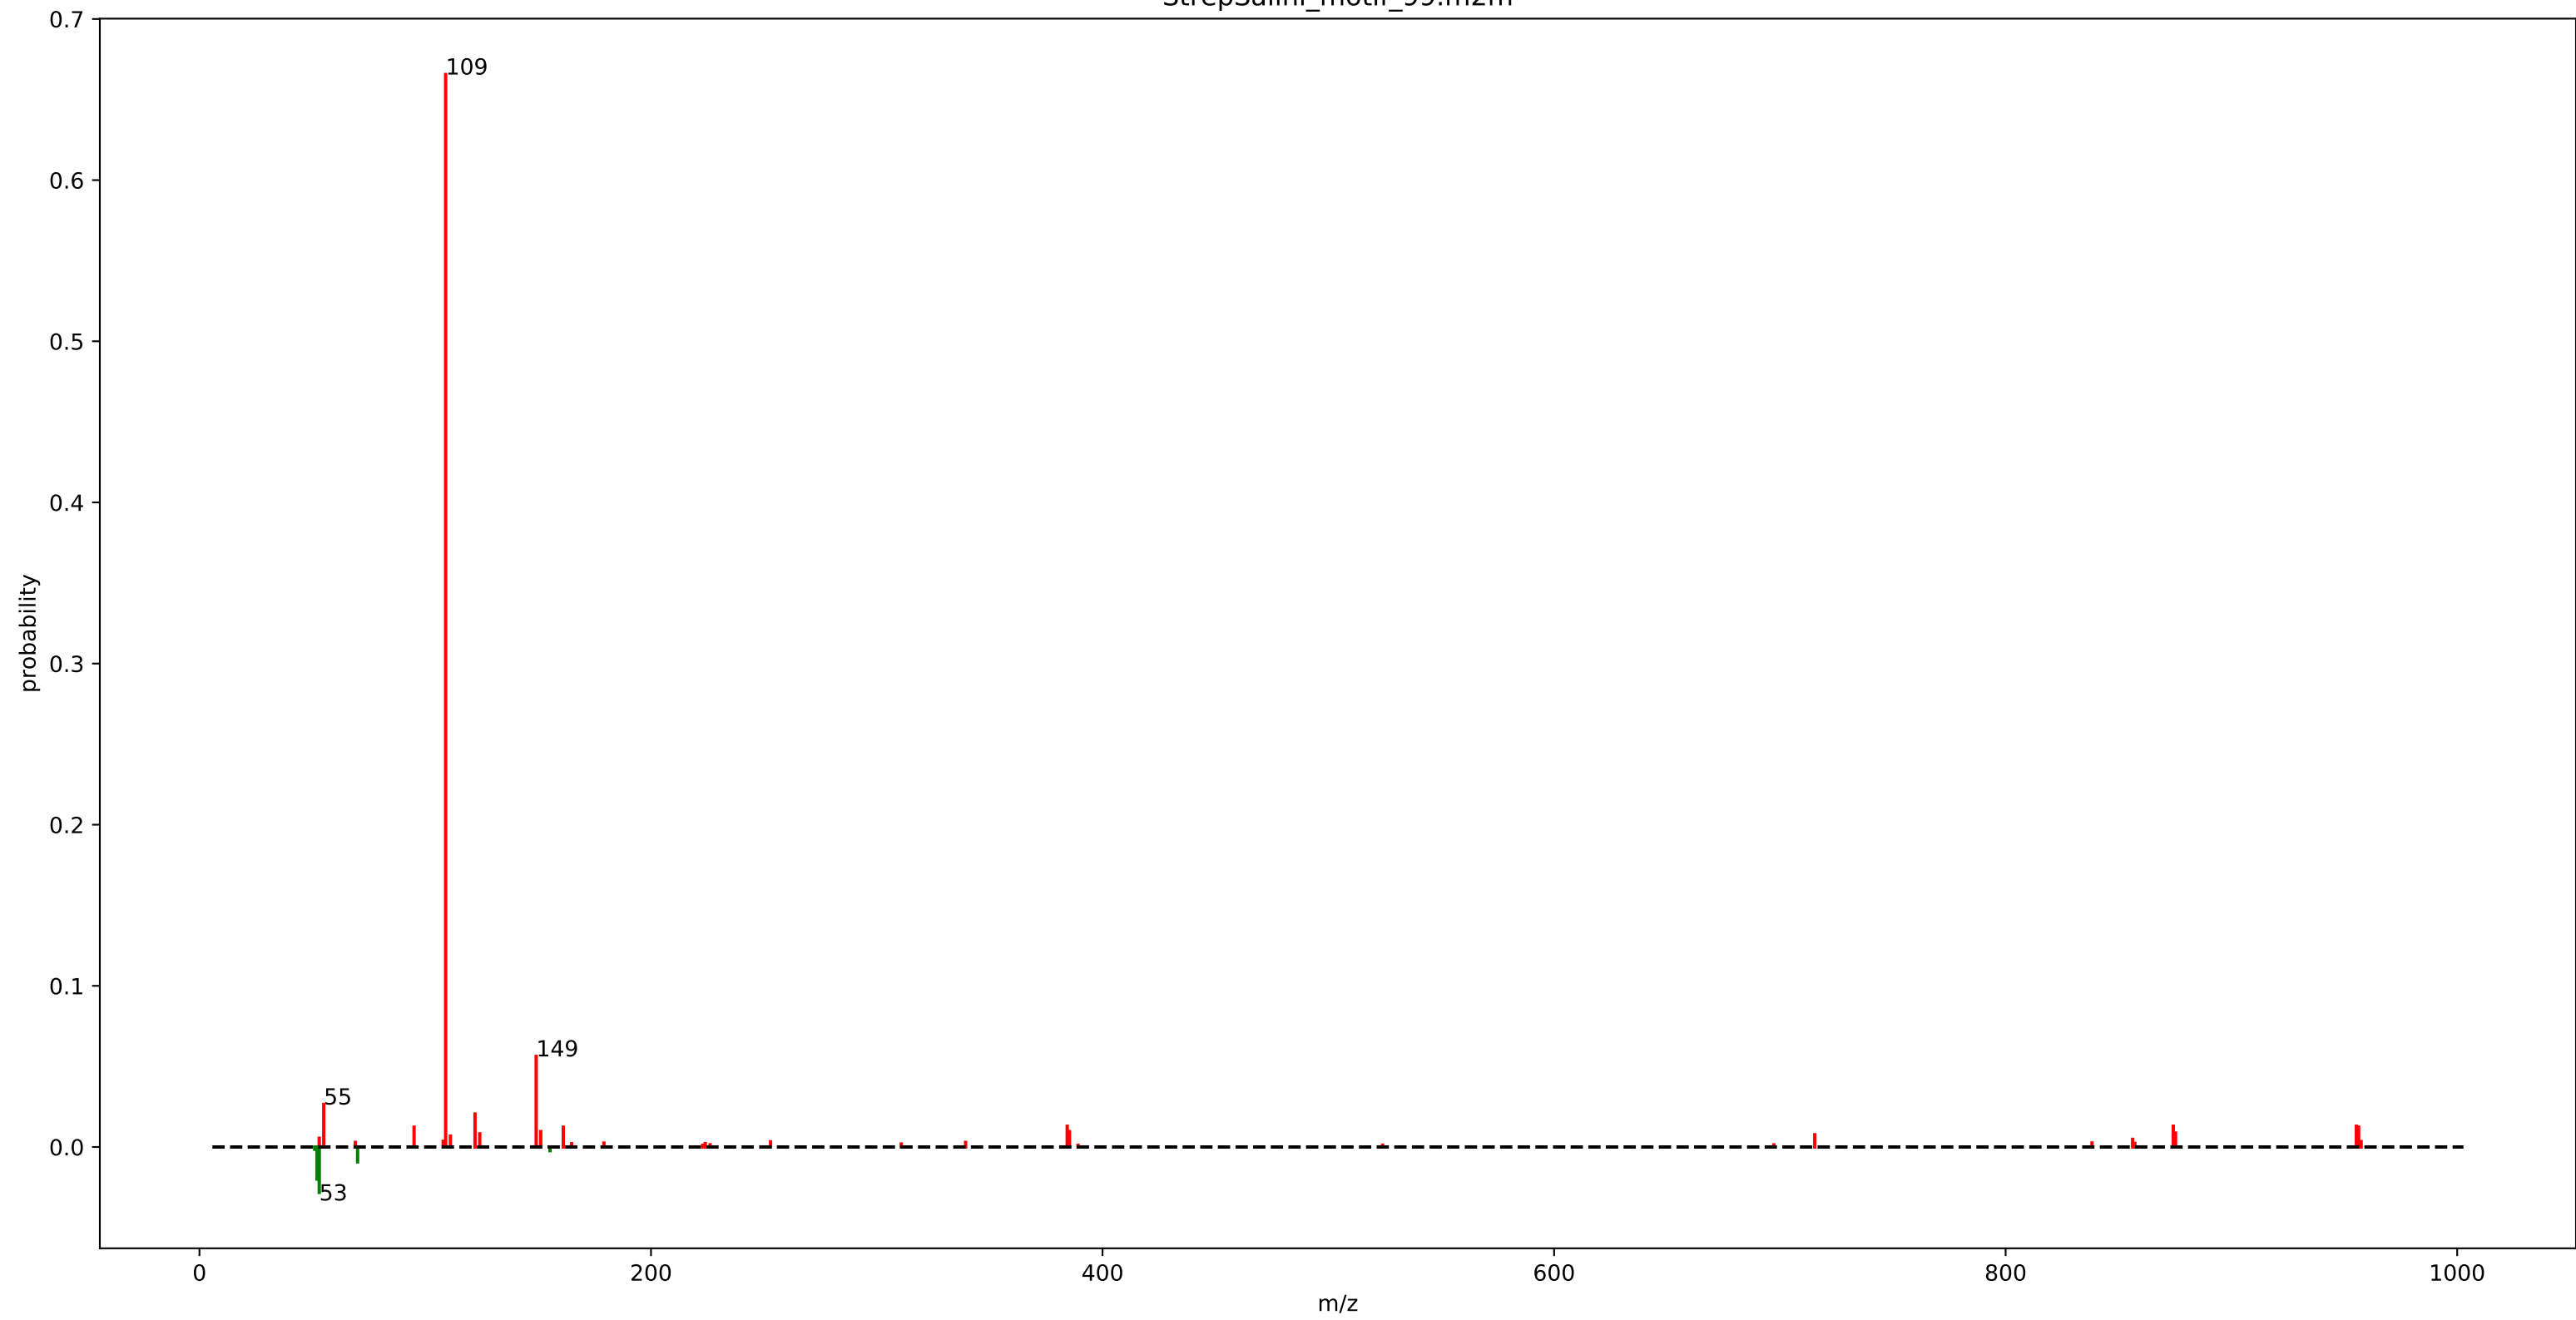

## StrepSalini\_motif\_99.m2m

|                   |        |
|-------------------|--------|
| fragment_109.0525 | : 0.67 |
| fragment_149.1500 | : 0.06 |
| loss_53.0500      | : 0.03 |
| fragment_55.0500  | : 0.03 |
| fragment_122.0500 | : 0.02 |
| loss_52.0500      | : 0.02 |
| fragment_955.3500 | : 0.01 |
| fragment_384.3500 | : 0.01 |
| fragment_874.2500 | : 0.01 |
| fragment_95.0500  | : 0.01 |
| fragment_161.1500 | : 0.01 |
| fragment_956.3500 | : 0.01 |
| fragment_385.3525 | : 0.01 |
| fragment_151.1500 | : 0.01 |
| loss_70.0475      | : 0.01 |
| fragment_875.2500 | : 0.01 |
| fragment_124.1500 | : 0.01 |
| fragment_715.4500 | : 0.01 |
| fragment_111.1500 | : 0.01 |
| fragment_53.0500  | : 0.01 |



gnps\_motif\_43.m2m

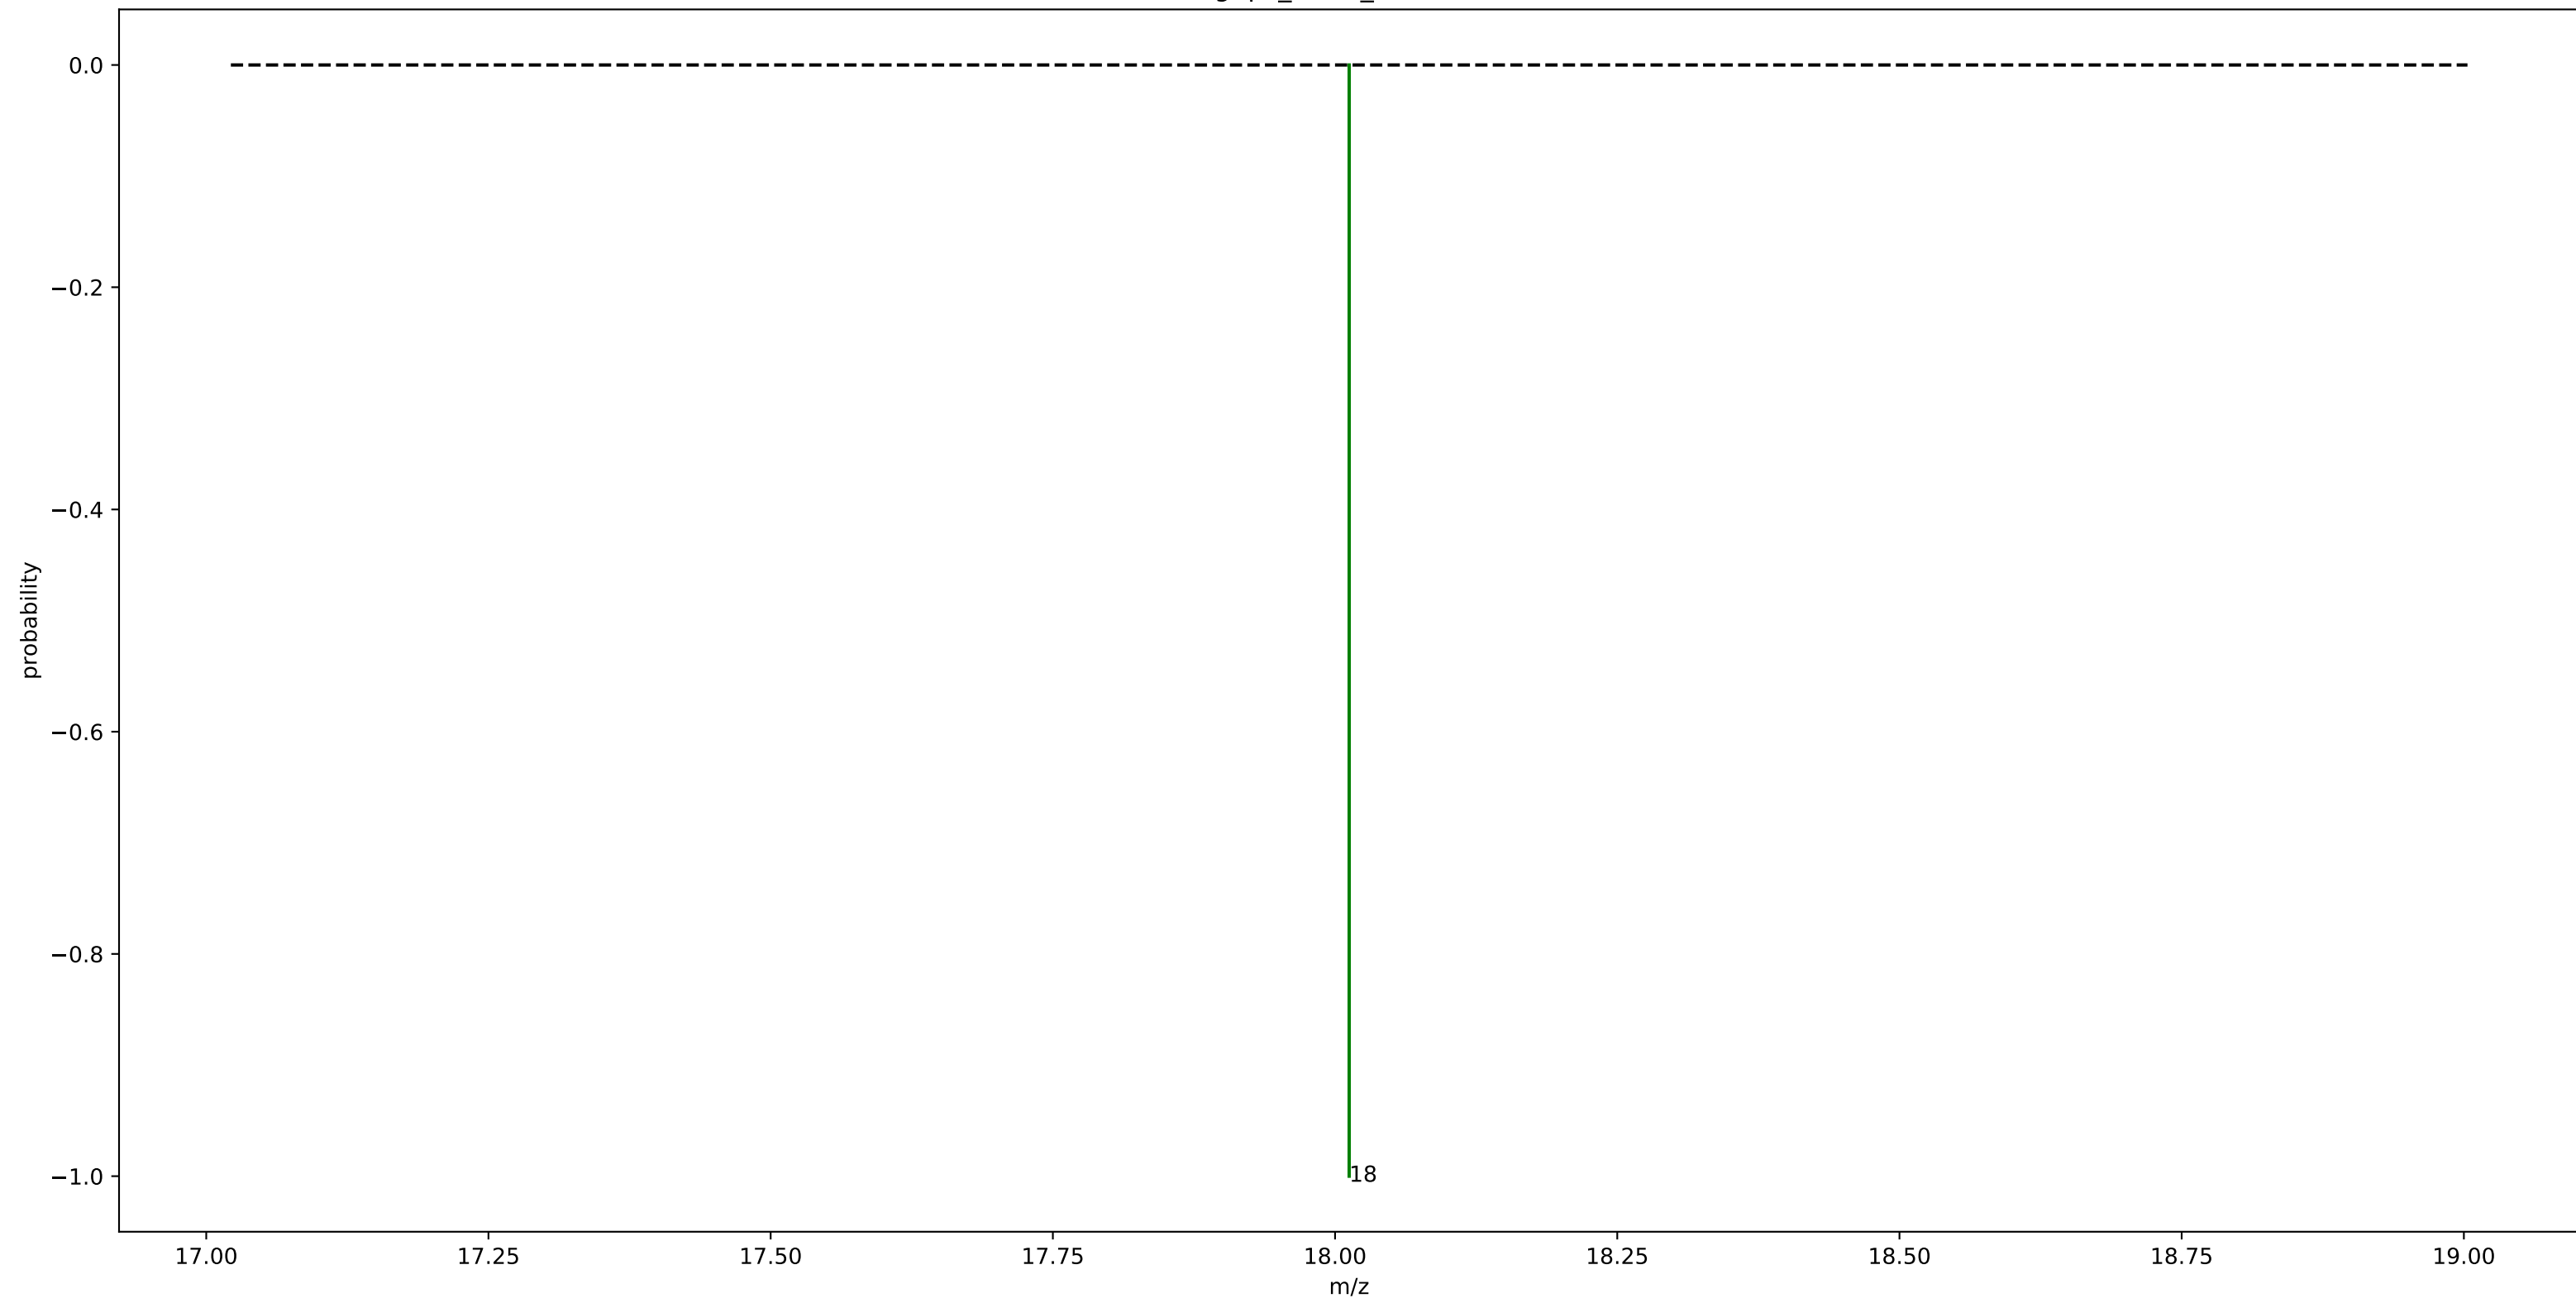

# gnps\_motif\_43.m2m

loss\_18.0125 : 1.00

gnps\_motif\_53.m2m

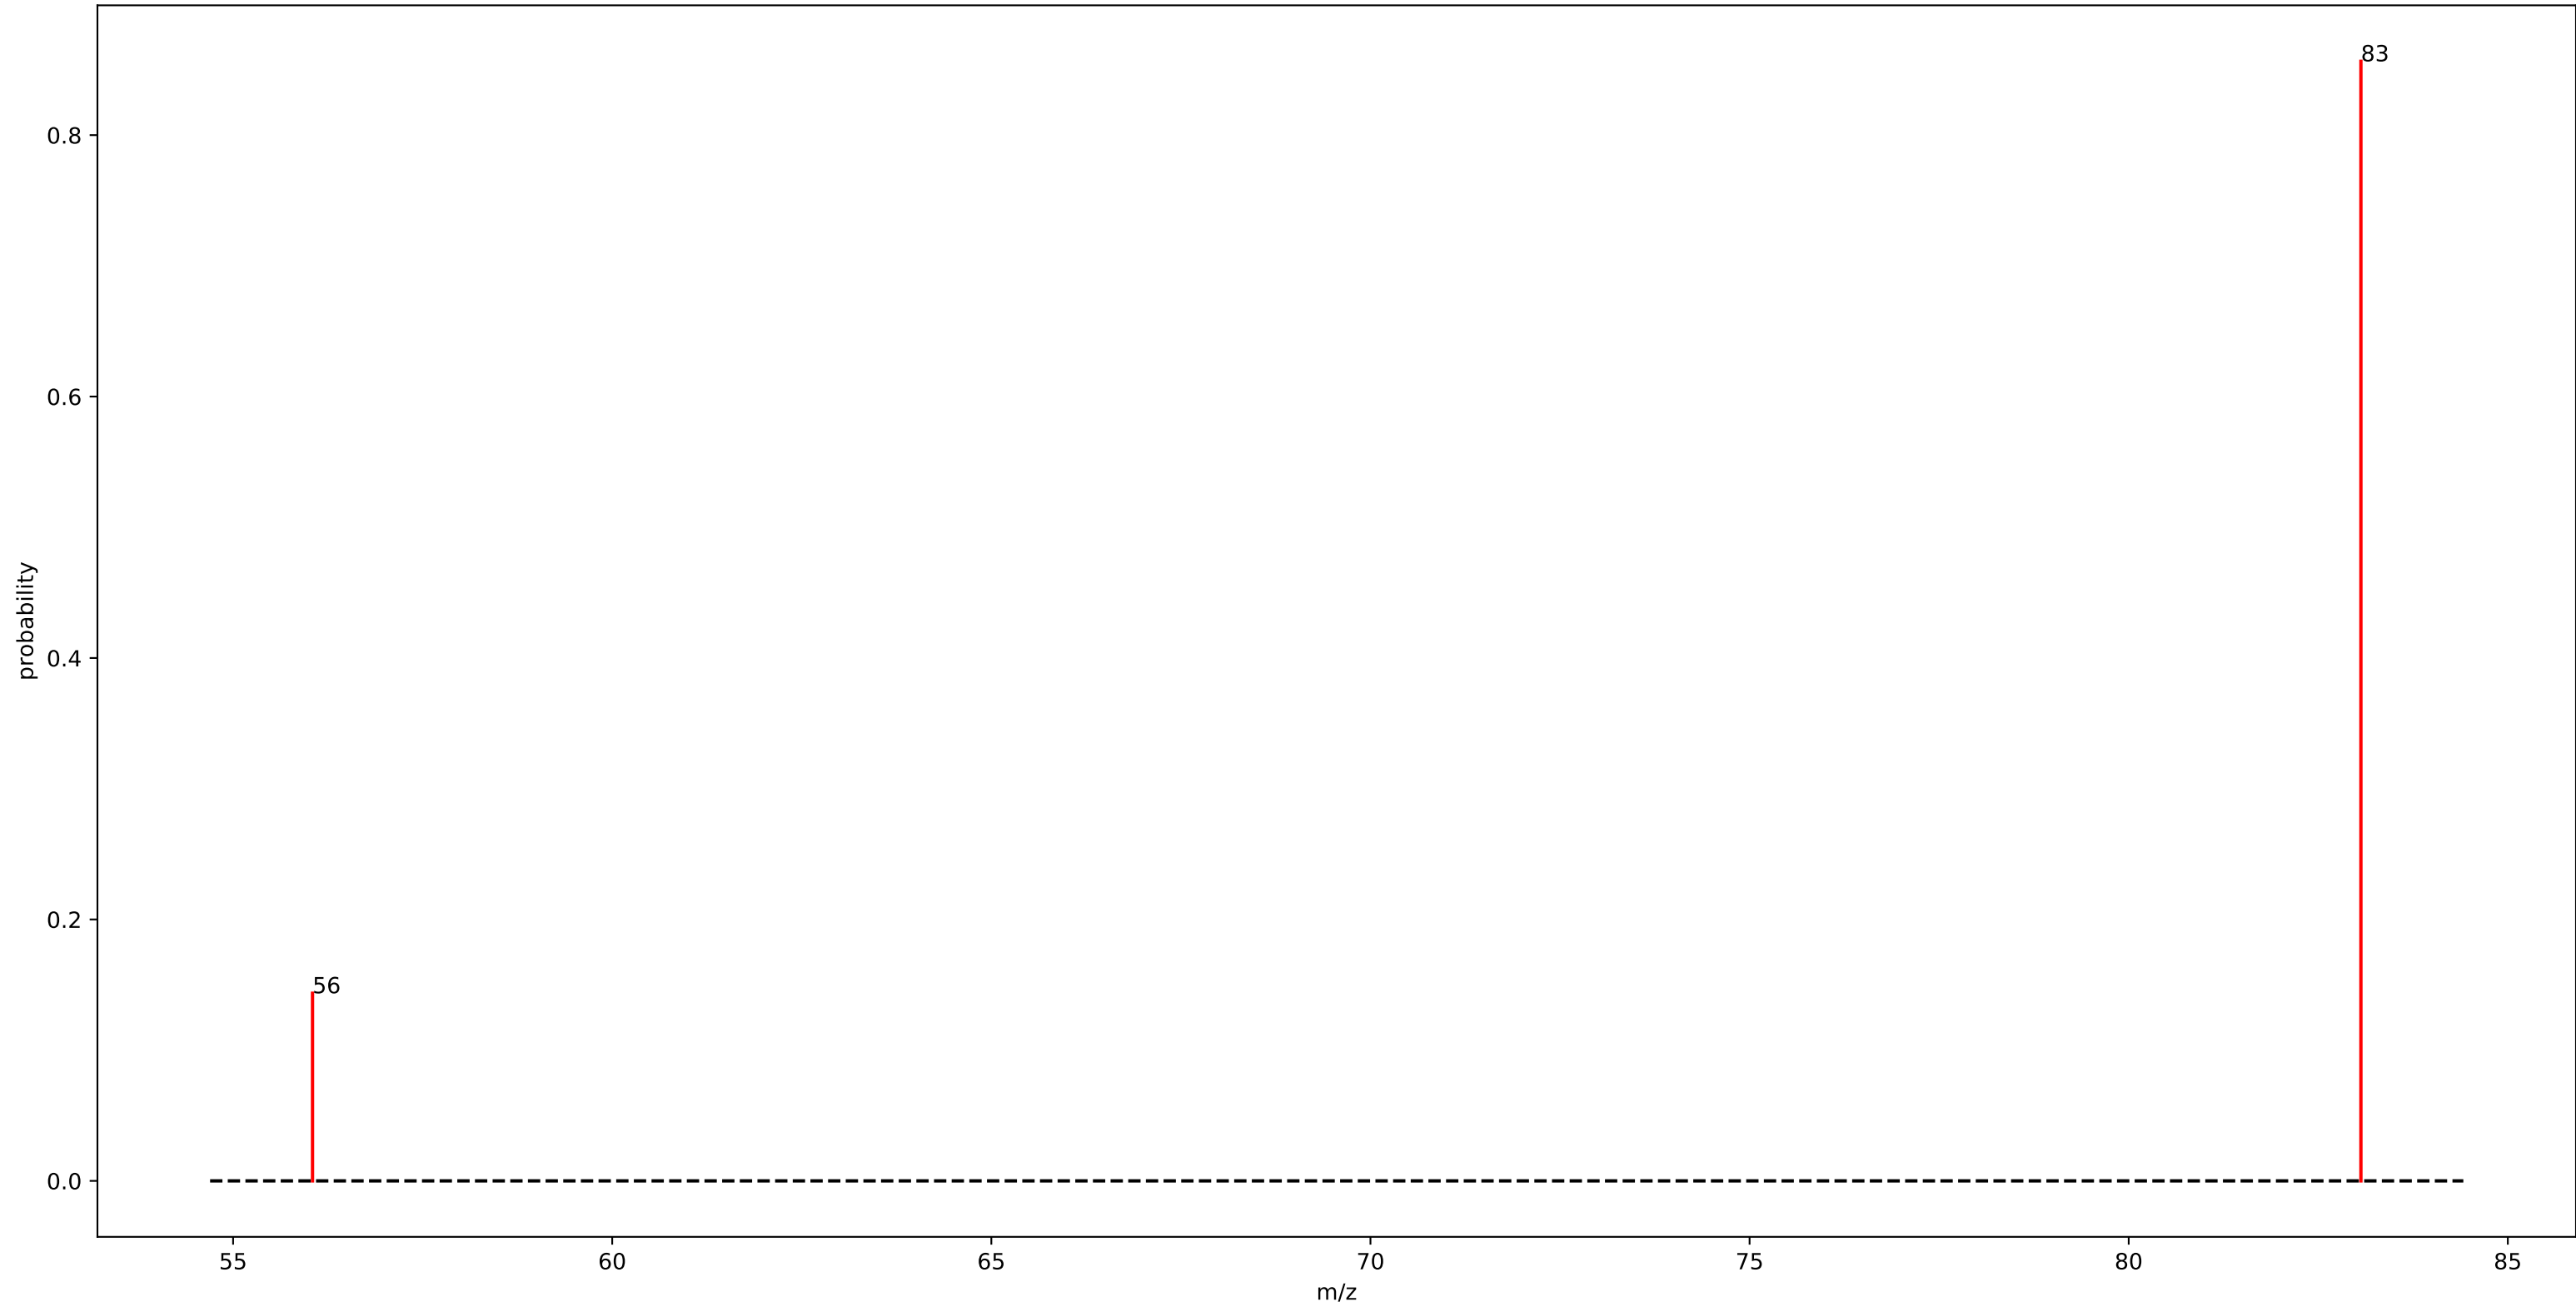

## gnps\_motif\_53.m2m

fragment\_83.0625 : 0.86  
fragment\_56.0475 : 0.14

urine\_mass2motif\_67.m2m

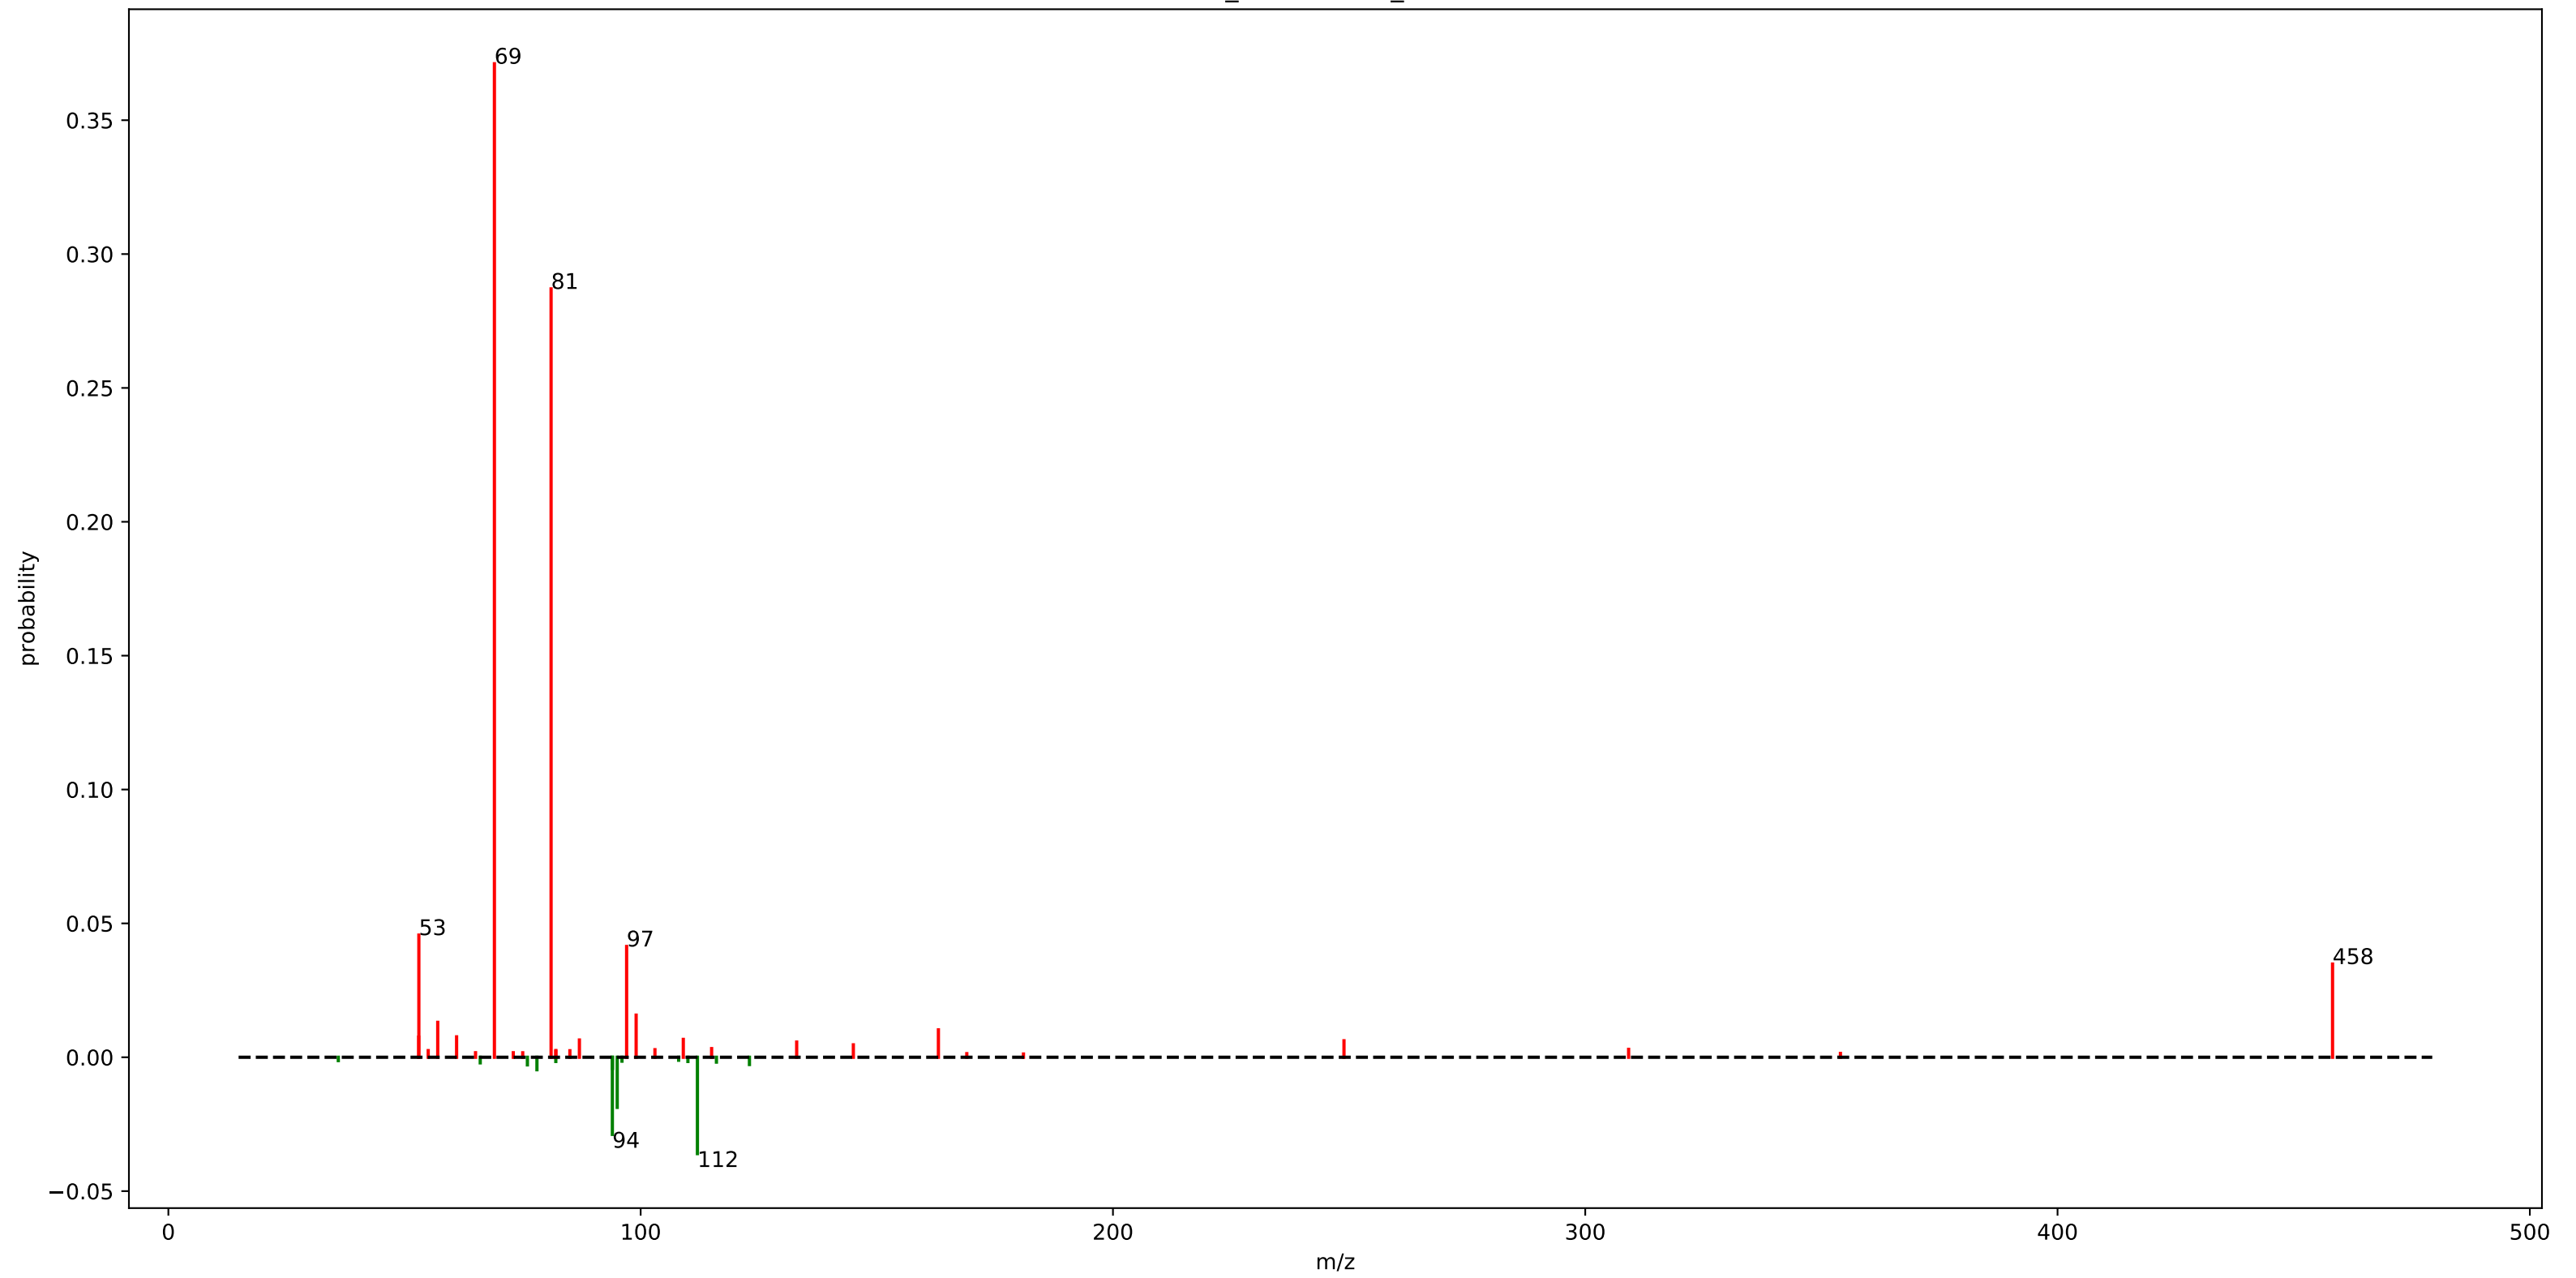

## urine\_mass2motif\_67.m2m

|                   |        |
|-------------------|--------|
| fragment_69.0325  | : 0.37 |
| fragment_81.0325  | : 0.29 |
| fragment_53.0375  | : 0.05 |
| fragment_97.0275  | : 0.04 |
| loss_112.0175     | : 0.04 |
| fragment_458.2275 | : 0.03 |
| loss_94.0075      | : 0.03 |
| loss_95.0375      | : 0.02 |
| fragment_99.0425  | : 0.02 |
| fragment_57.0325  | : 0.01 |
| fragment_163.0425 | : 0.01 |
| fragment_61.0275  | : 0.01 |
| fragment_53.0025  | : 0.01 |
| fragment_109.0275 | : 0.01 |
| fragment_87.0275  | : 0.01 |
| fragment_248.9175 | : 0.01 |
| fragment_133.0325 | : 0.01 |

euphorbia\_motif\_254.m2m

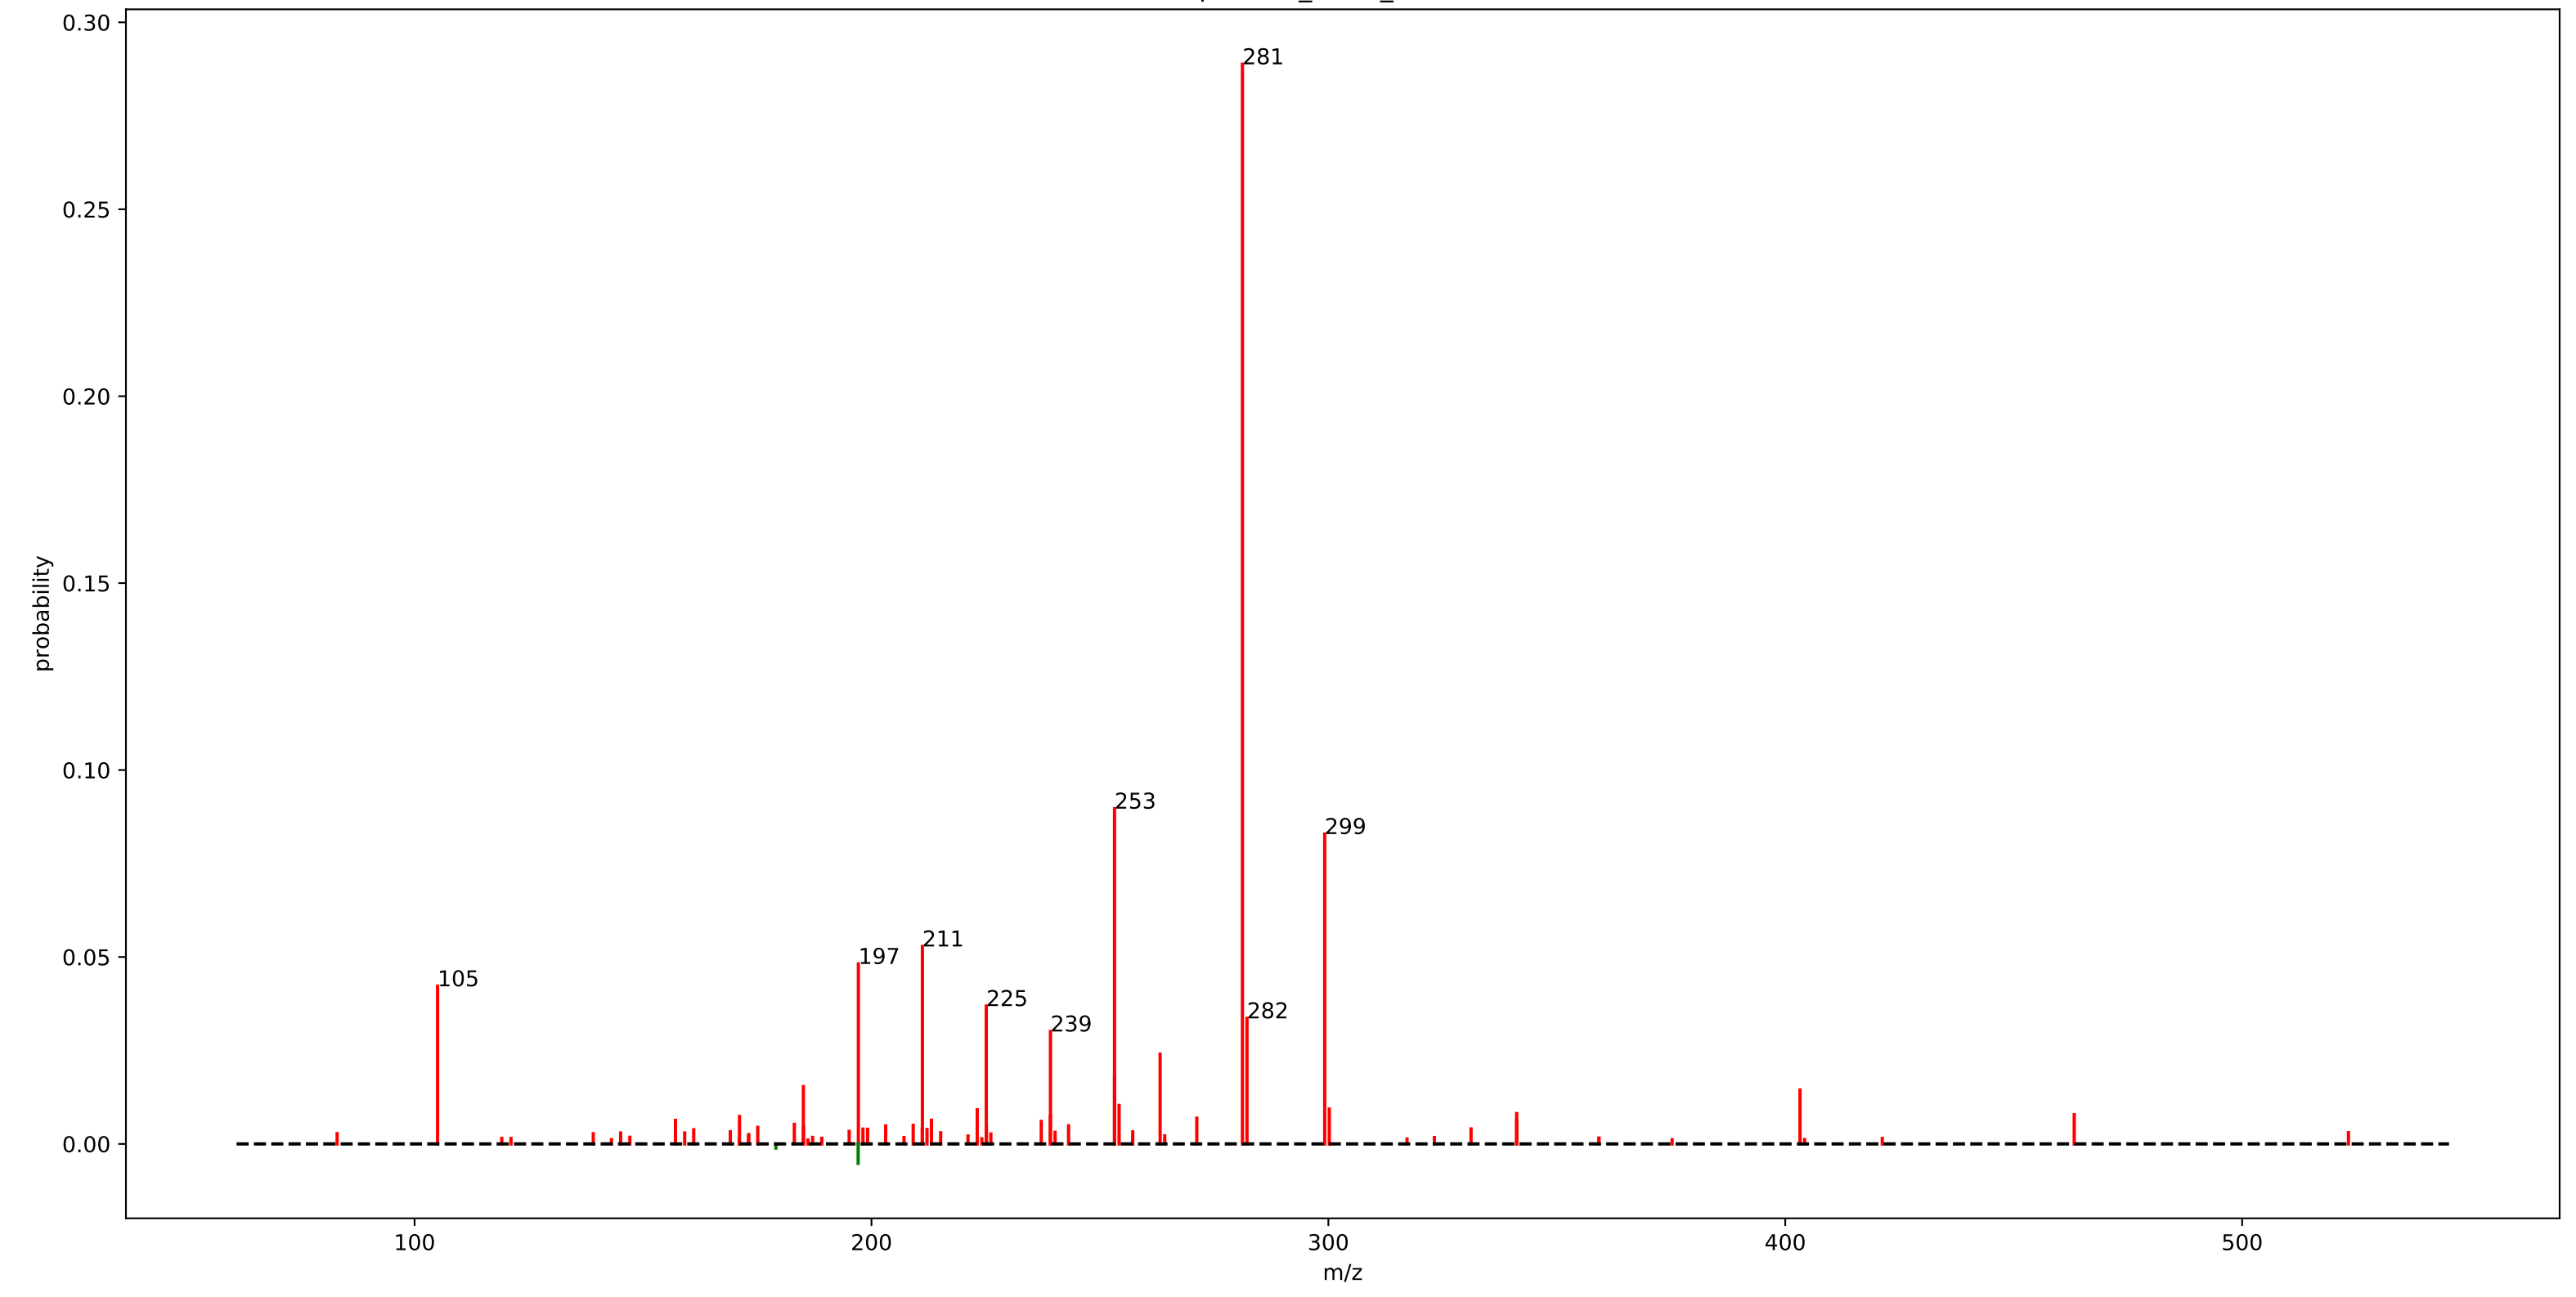

## euphorbia\_motif\_254.m2m

|                   |        |                   |        |
|-------------------|--------|-------------------|--------|
| fragment_281.1925 | : 0.29 | fragment_271.2075 | : 0.01 |
| fragment_253.1975 | : 0.09 | fragment_213.1275 | : 0.01 |
| fragment_299.2025 | : 0.08 | fragment_157.1025 | : 0.01 |
| fragment_211.1475 | : 0.05 | fragment_341.2075 | : 0.01 |
| fragment_197.1325 | : 0.05 | fragment_237.1625 | : 0.01 |
| fragment_105.0325 | : 0.04 | fragment_183.1175 | : 0.01 |
| fragment_225.1275 | : 0.04 | loss_197.0875     | : 0.01 |
| fragment_282.1925 | : 0.03 |                   |        |
| fragment_239.1775 | : 0.03 |                   |        |
| fragment_263.1775 | : 0.02 |                   |        |
| fragment_253.1925 | : 0.02 |                   |        |
| fragment_185.0975 | : 0.02 |                   |        |
| fragment_403.2275 | : 0.01 |                   |        |
| fragment_254.1975 | : 0.01 |                   |        |
| fragment_300.2025 | : 0.01 |                   |        |
| fragment_223.1475 | : 0.01 |                   |        |
| fragment_341.2125 | : 0.01 |                   |        |
| fragment_463.2475 | : 0.01 |                   |        |
| fragment_239.1425 | : 0.01 |                   |        |
| fragment_171.1175 | : 0.01 |                   |        |



gnps\_motif\_24.m2m

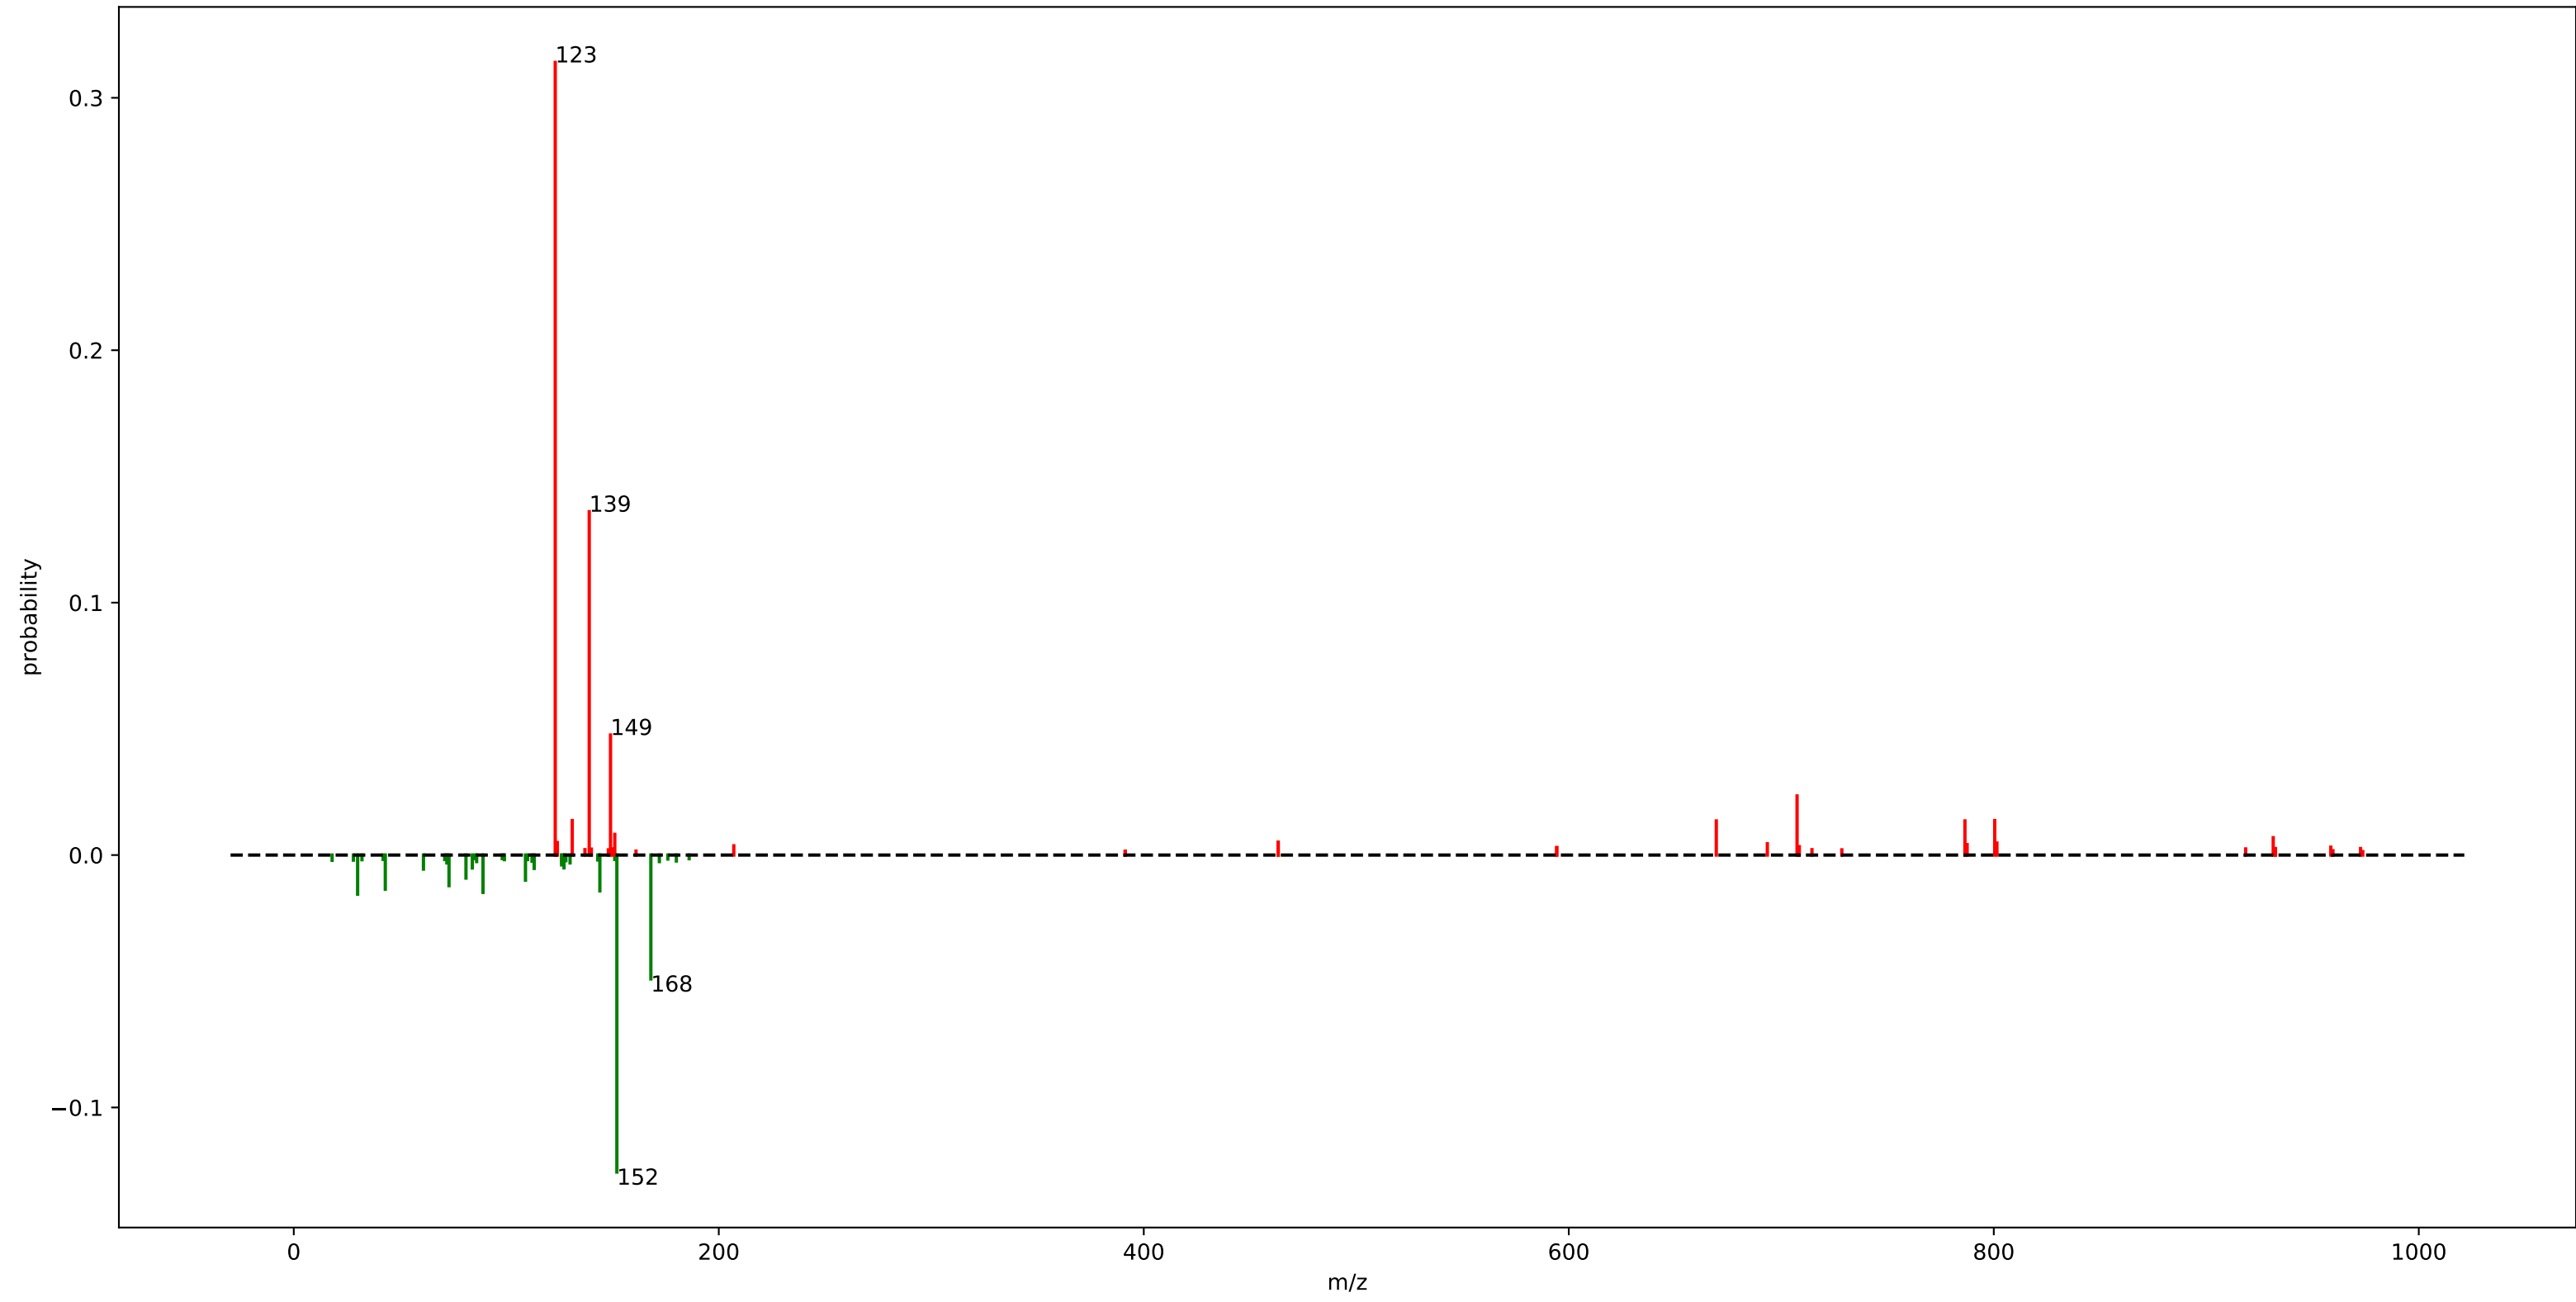

## gnps\_motif\_24.m2m

|                   |        |                   |        |
|-------------------|--------|-------------------|--------|
| fragment_123.0425 | : 0.31 | loss_113.1325     | : 0.01 |
| fragment_139.0375 | : 0.14 | fragment_463.2475 | : 0.01 |
| loss_152.0475     | : 0.13 | loss_84.0225      | : 0.01 |
| loss_168.0425     | : 0.05 | loss_127.1675     | : 0.01 |
| fragment_149.0575 | : 0.05 |                   |        |
| fragment_707.4275 | : 0.02 |                   |        |
| loss_30.0475      | : 0.02 |                   |        |
| loss_89.0475      | : 0.01 |                   |        |
| loss_144.0425     | : 0.01 |                   |        |
| fragment_131.0475 | : 0.01 |                   |        |
| fragment_800.4525 | : 0.01 |                   |        |
| fragment_786.4275 | : 0.01 |                   |        |
| fragment_669.4175 | : 0.01 |                   |        |
| loss_43.0725      | : 0.01 |                   |        |
| loss_73.0525      | : 0.01 |                   |        |
| loss_109.0375     | : 0.01 |                   |        |
| loss_81.0375      | : 0.01 |                   |        |
| fragment_151.0625 | : 0.01 |                   |        |
| fragment_931.5025 | : 0.01 |                   |        |
| loss_61.0275      | : 0.01 |                   |        |

motif\_418

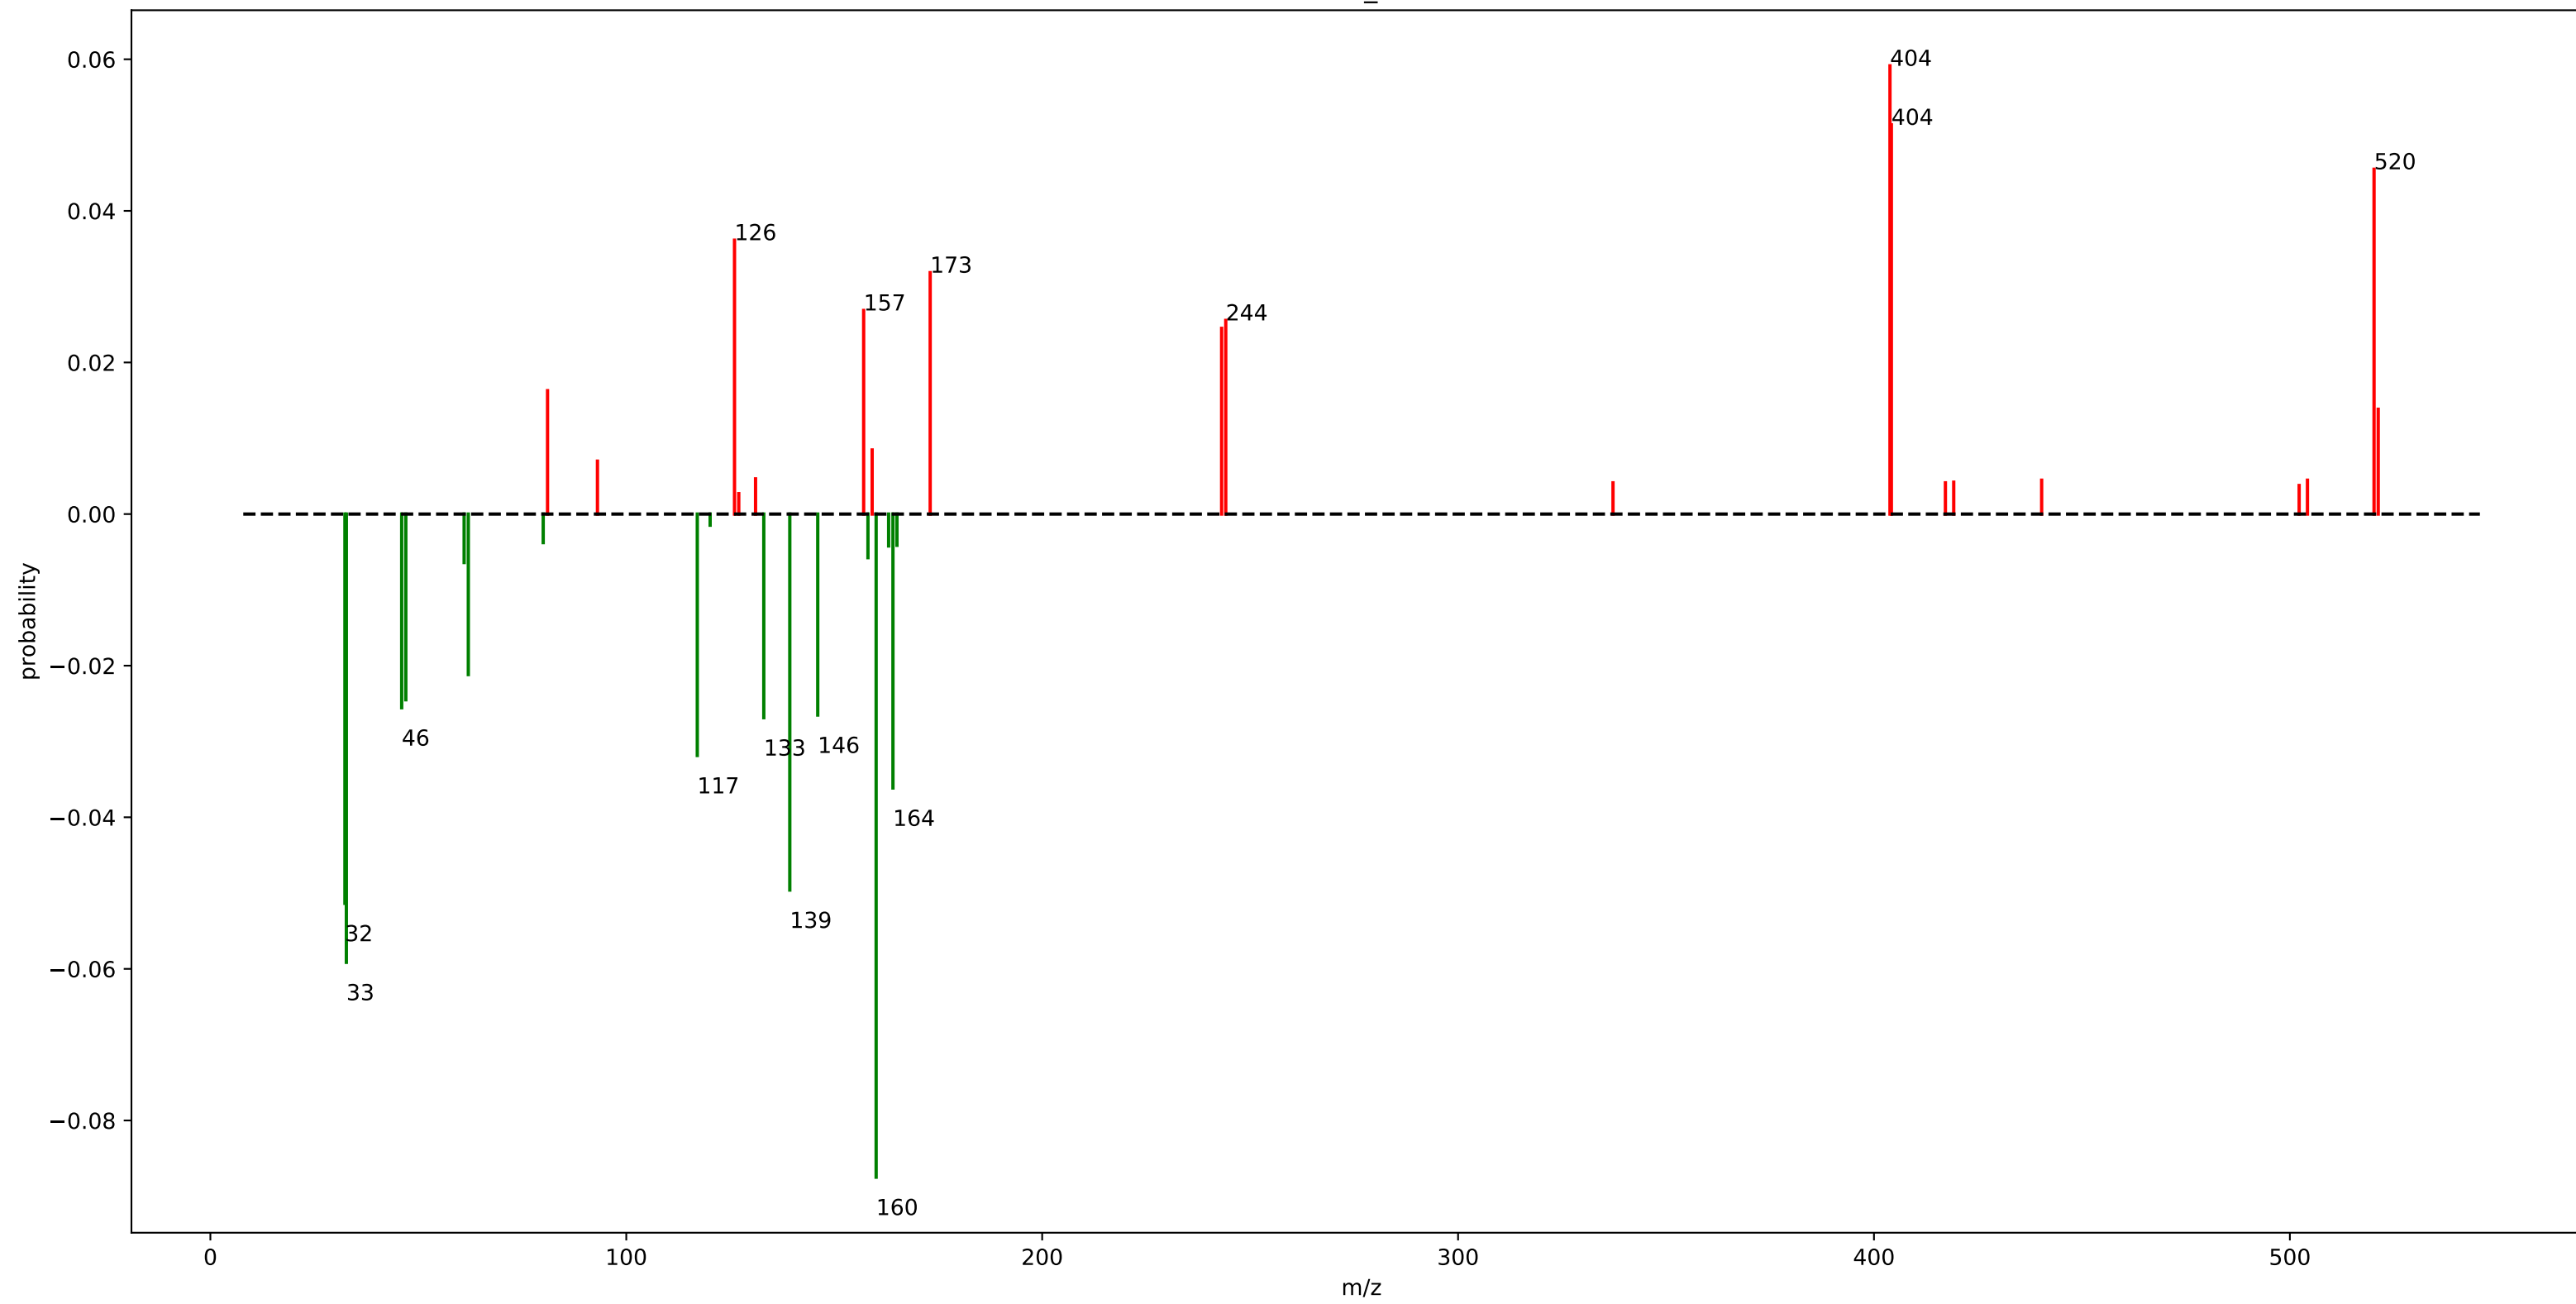

# motif\_418

|                   |        |                   |        |
|-------------------|--------|-------------------|--------|
| loss_160.0775     | : 0.09 | fragment_521.2425 | : 0.01 |
| loss_32.6925      | : 0.06 | fragment_159.1175 | : 0.01 |
| fragment_403.8475 | : 0.06 | fragment_93.0675  | : 0.01 |
| loss_32.3525      | : 0.05 | loss_61.0125      | : 0.01 |
| fragment_404.1825 | : 0.05 | loss_158.1075     | : 0.01 |
| loss_139.3175     | : 0.05 |                   |        |
| fragment_520.2425 | : 0.05 |                   |        |
| fragment_126.0225 | : 0.04 |                   |        |
| loss_164.1175     | : 0.04 |                   |        |
| fragment_173.0725 | : 0.03 |                   |        |
| loss_117.0725     | : 0.03 |                   |        |
| fragment_157.0775 | : 0.03 |                   |        |
| loss_133.0625     | : 0.03 |                   |        |
| loss_146.0375     | : 0.03 |                   |        |
| fragment_244.1425 | : 0.03 |                   |        |
| loss_45.9975      | : 0.03 |                   |        |
| loss_46.9925      | : 0.02 |                   |        |
| fragment_243.1475 | : 0.02 |                   |        |
| loss_62.0175      | : 0.02 |                   |        |
| fragment_81.0675  | : 0.02 |                   |        |

motif\_419

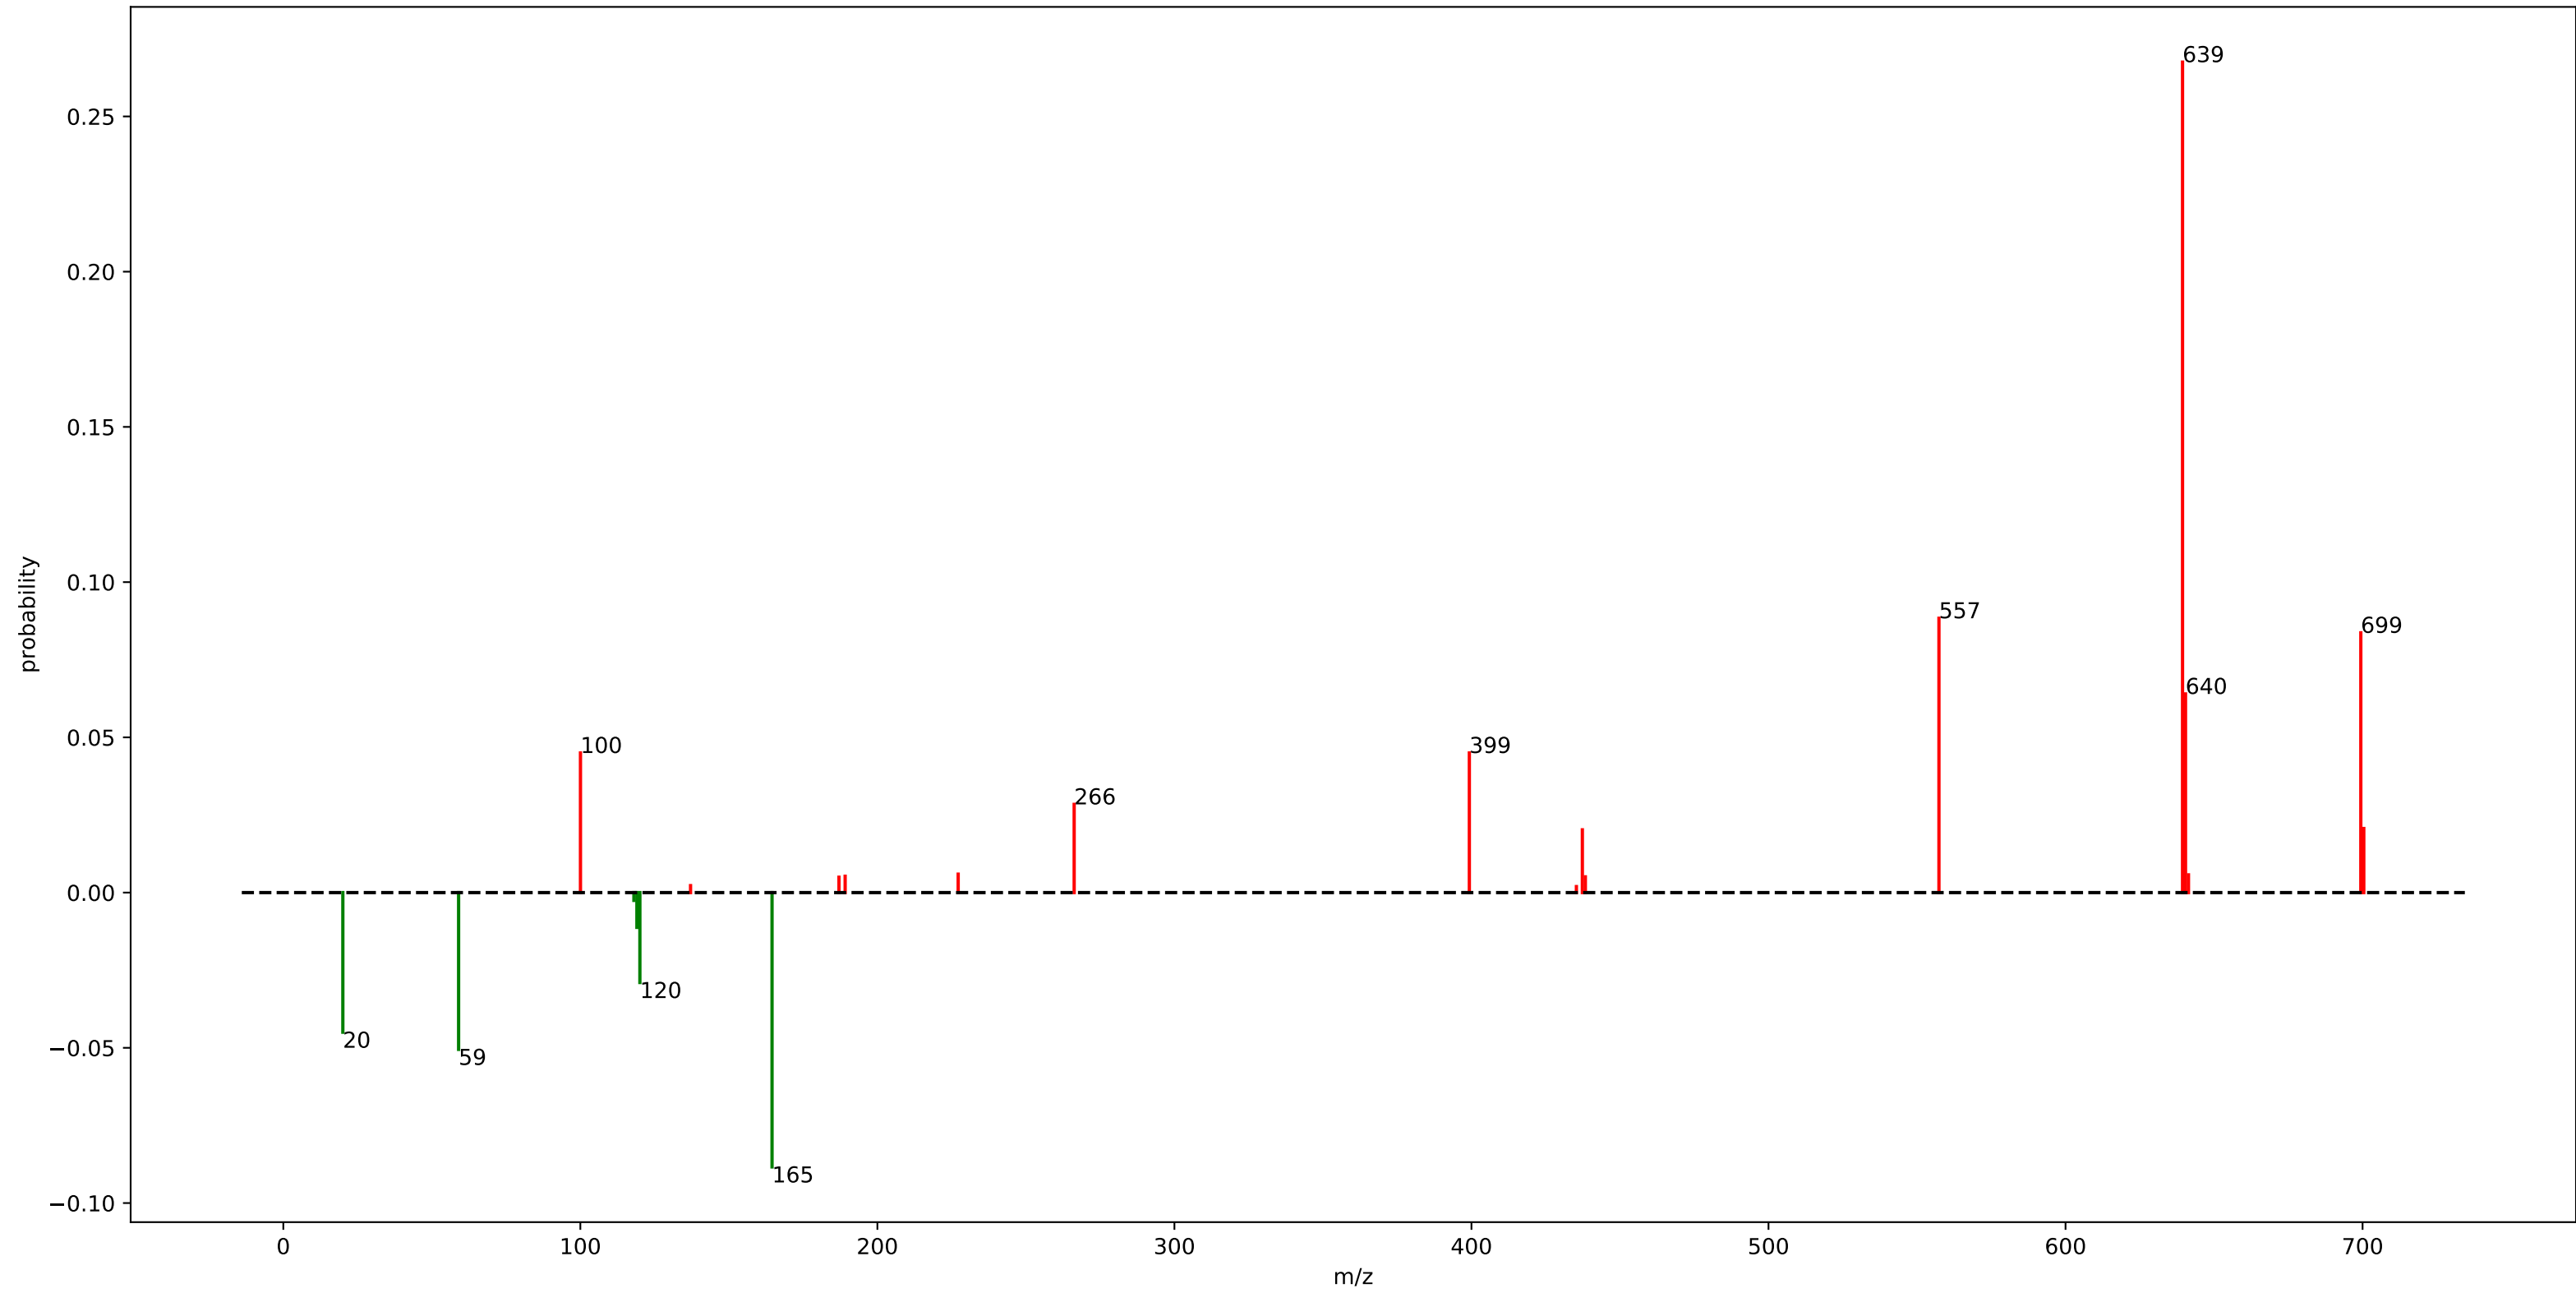

## motif\_419

|                   |        |
|-------------------|--------|
| fragment_639.3875 | : 0.27 |
| loss_164.5325     | : 0.09 |
| fragment_557.3825 | : 0.09 |
| fragment_699.4075 | : 0.08 |
| fragment_640.3925 | : 0.06 |
| loss_59.0125      | : 0.05 |
| fragment_399.2875 | : 0.04 |
| loss_20.0425      | : 0.04 |
| fragment_100.0375 | : 0.04 |
| loss_120.0425     | : 0.03 |
| fragment_266.2475 | : 0.03 |
| fragment_700.4125 | : 0.02 |
| fragment_437.3325 | : 0.02 |
| loss_119.0375     | : 0.01 |
| fragment_227.1975 | : 0.01 |
| fragment_641.3925 | : 0.01 |
| fragment_189.1475 | : 0.01 |
| fragment_438.3425 | : 0.01 |

rhabdus\_motif\_210.m2m

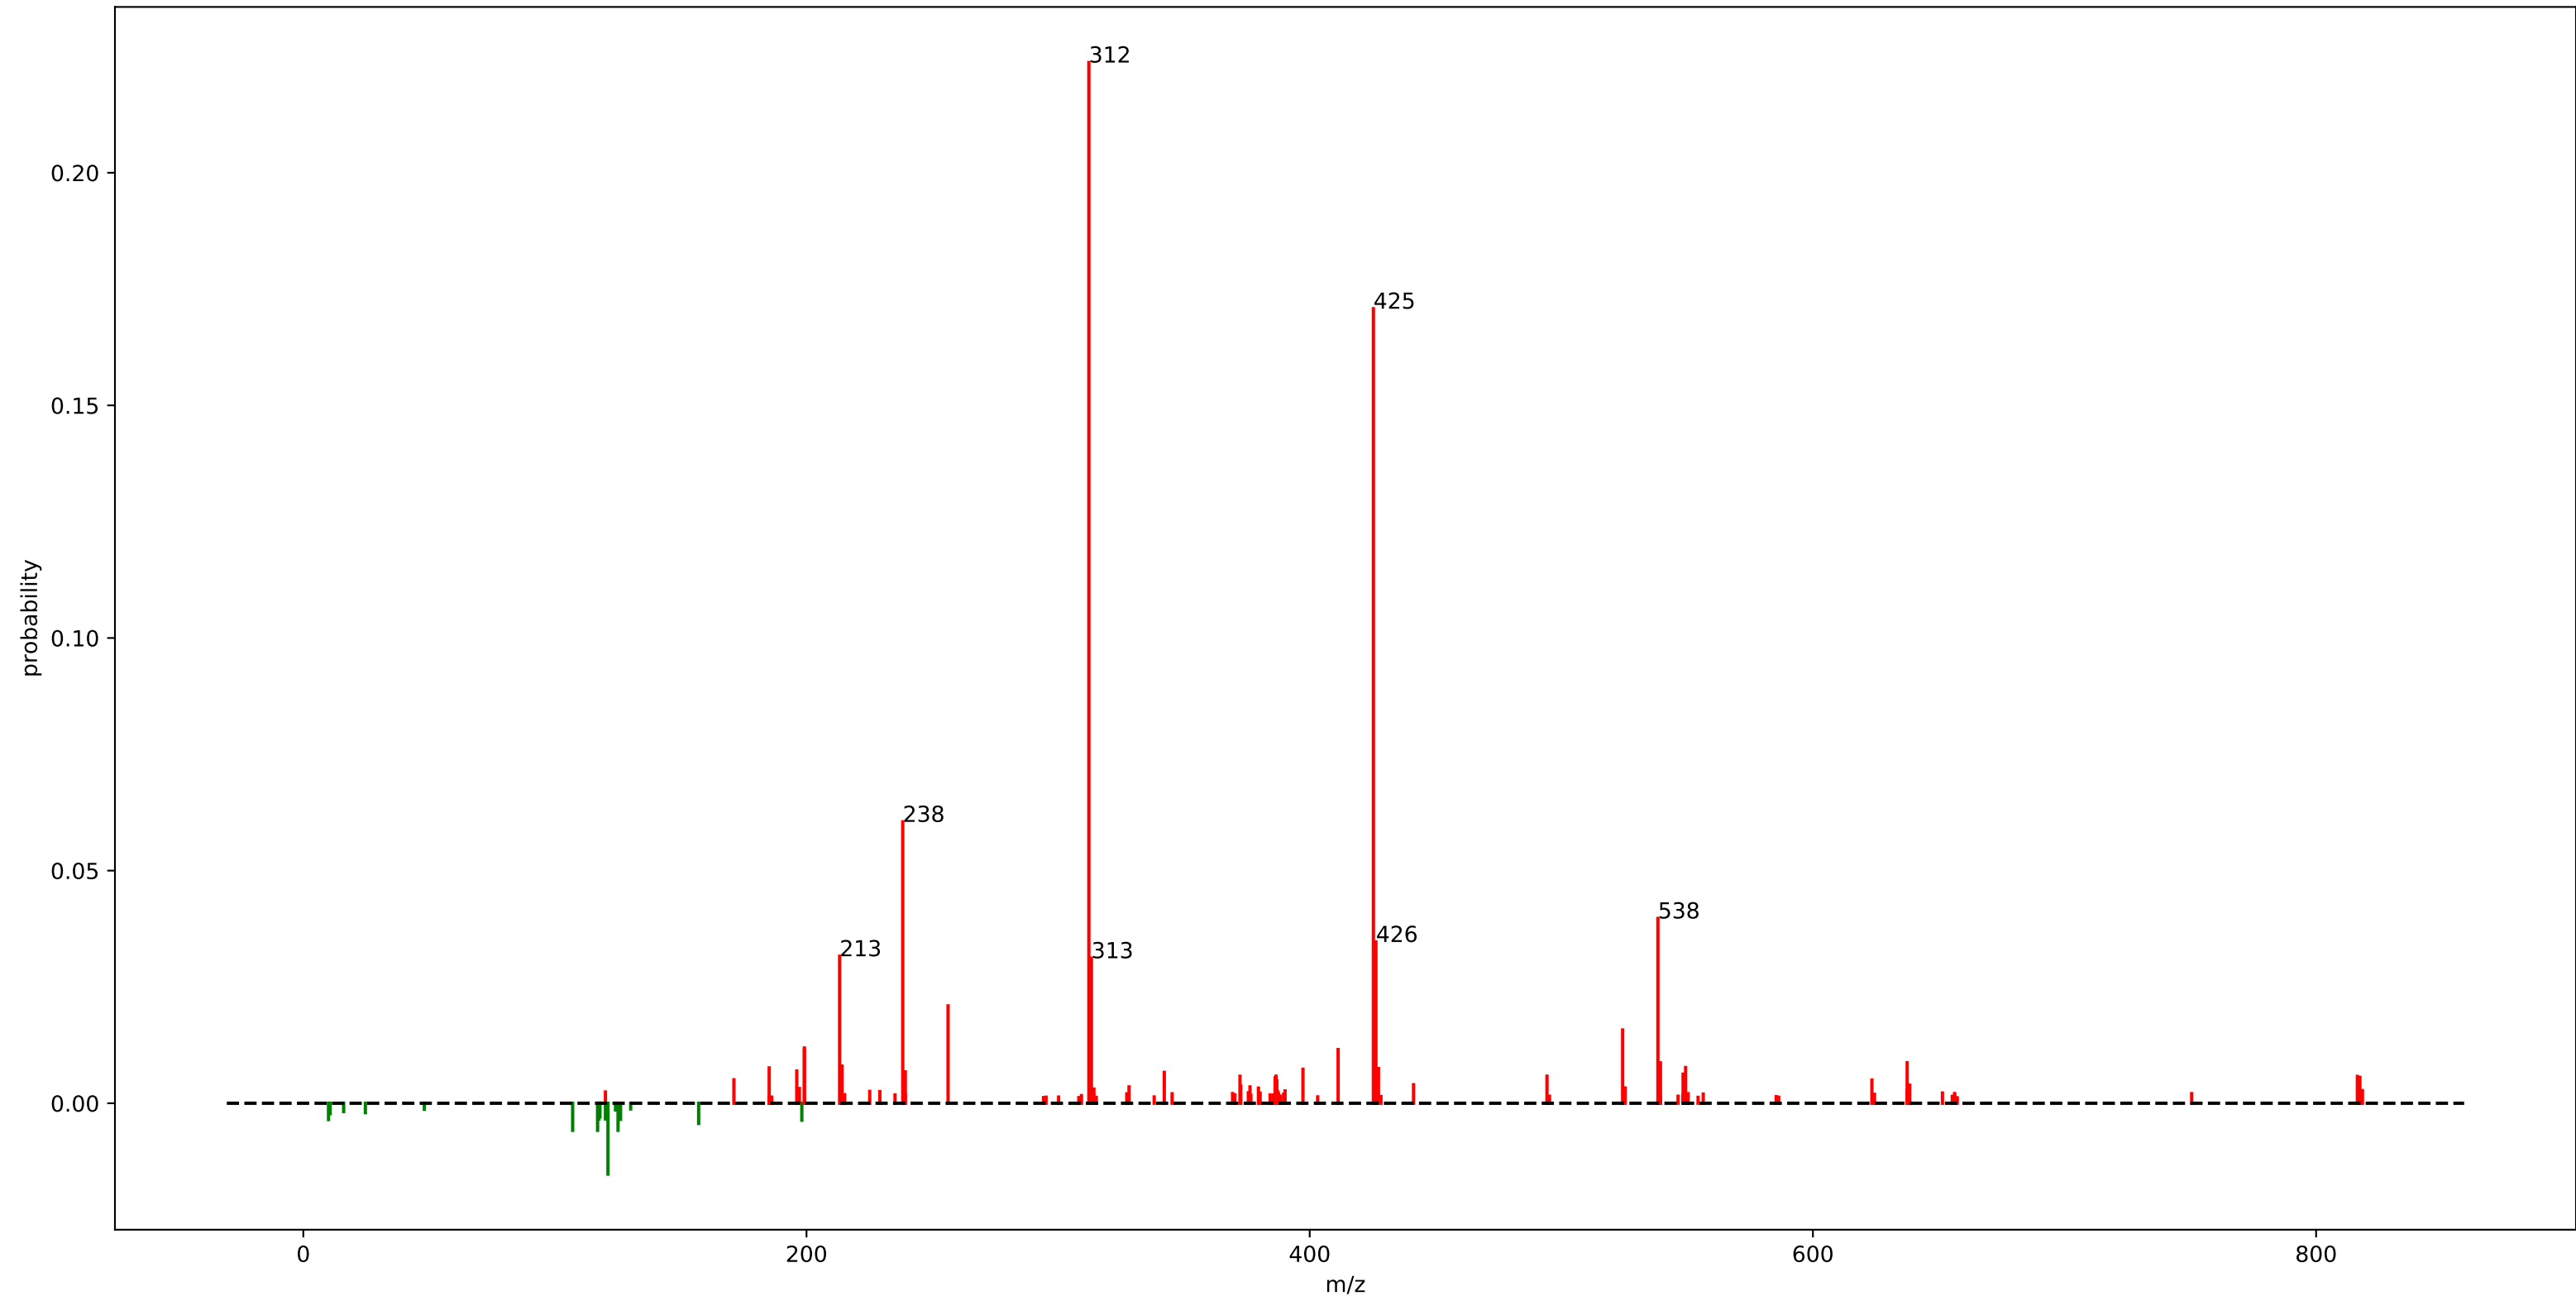

## rhabdus\_motif\_210.m2m

|                   |        |                   |        |
|-------------------|--------|-------------------|--------|
| fragment_312.2275 | : 0.22 | fragment_397.3175 | : 0.01 |
| fragment_425.3125 | : 0.17 | fragment_196.1325 | : 0.01 |
| fragment_238.2525 | : 0.06 | fragment_239.2575 | : 0.01 |
| fragment_538.3975 | : 0.04 | fragment_342.2025 | : 0.01 |
| fragment_426.3175 | : 0.03 | fragment_548.4025 | : 0.01 |
| fragment_213.1575 | : 0.03 | loss_107.0575     | : 0.01 |
| fragment_313.2325 | : 0.03 | fragment_494.3075 | : 0.01 |
| fragment_256.2625 | : 0.02 | loss_116.9675     | : 0.01 |
| fragment_524.3825 | : 0.02 | fragment_386.6125 | : 0.01 |
| loss_121.0875     | : 0.02 | loss_125.0925     | : 0.01 |
| fragment_199.1525 | : 0.01 | fragment_372.2825 | : 0.01 |
| fragment_411.2975 | : 0.01 | fragment_816.4025 | : 0.01 |
| fragment_199.1475 | : 0.01 | fragment_817.4125 | : 0.01 |
| fragment_637.4625 | : 0.01 | fragment_386.2725 | : 0.01 |
| fragment_539.3975 | : 0.01 | fragment_171.1475 | : 0.01 |
| fragment_214.1625 | : 0.01 |                   |        |
| fragment_549.4075 | : 0.01 |                   |        |
| fragment_185.1625 | : 0.01 |                   |        |
| fragment_427.3175 | : 0.01 |                   |        |
| fragment_426.3125 | : 0.01 |                   |        |



gnps\_motif\_60.m2m

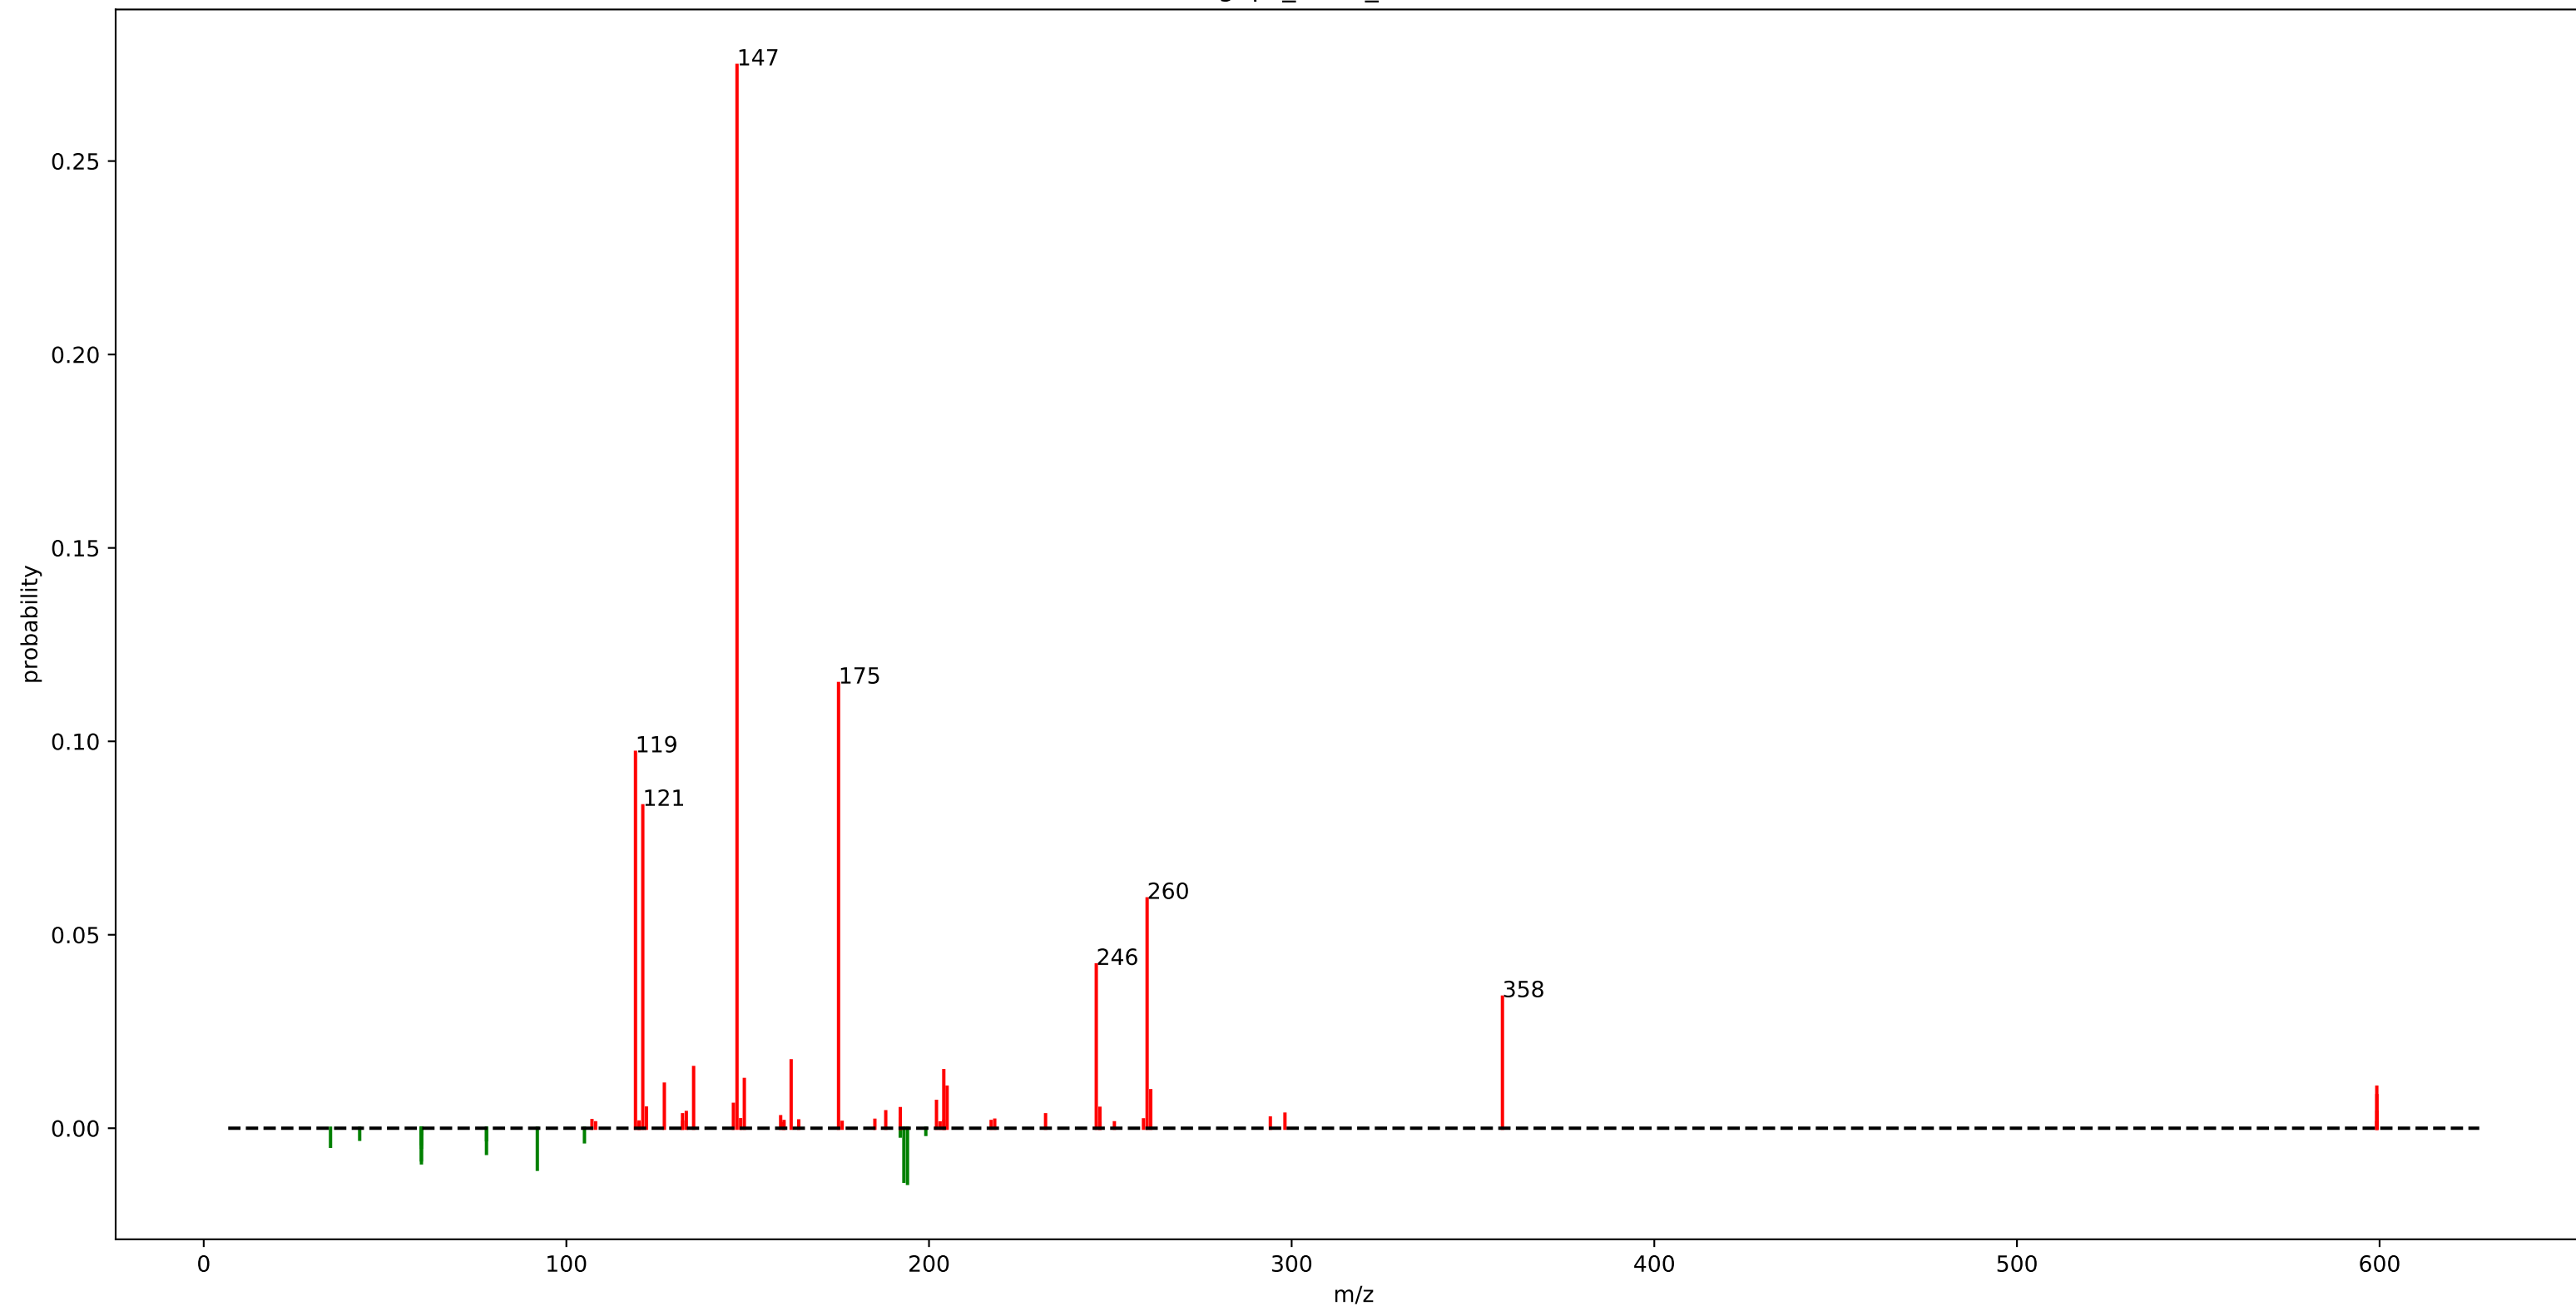

# gnps\_motif\_60.m2m

|                   |        |                   |        |
|-------------------|--------|-------------------|--------|
| fragment_147.0575 | : 0.27 | loss_60.0125      | : 0.01 |
| fragment_175.0525 | : 0.11 | fragment_202.0625 | : 0.01 |
| fragment_119.0625 | : 0.10 | loss_77.9725      | : 0.01 |
| fragment_121.0775 | : 0.08 | fragment_146.0625 | : 0.01 |
| fragment_260.1425 | : 0.06 | fragment_122.0775 | : 0.01 |
| fragment_246.1225 | : 0.04 | fragment_247.1275 | : 0.01 |
| fragment_358.1225 | : 0.03 | fragment_192.0825 | : 0.01 |
| fragment_161.9875 | : 0.02 |                   |        |
| fragment_135.0925 | : 0.02 |                   |        |
| fragment_204.0775 | : 0.01 |                   |        |
| loss_194.0675     | : 0.01 |                   |        |
| loss_193.0725     | : 0.01 |                   |        |
| fragment_149.0725 | : 0.01 |                   |        |
| fragment_127.0175 | : 0.01 |                   |        |
| loss_91.9925      | : 0.01 |                   |        |
| fragment_599.2325 | : 0.01 |                   |        |
| fragment_204.9925 | : 0.01 |                   |        |
| fragment_261.1425 | : 0.01 |                   |        |
| loss_60.0325      | : 0.01 |                   |        |
| fragment_599.2575 | : 0.01 |                   |        |

motif\_413

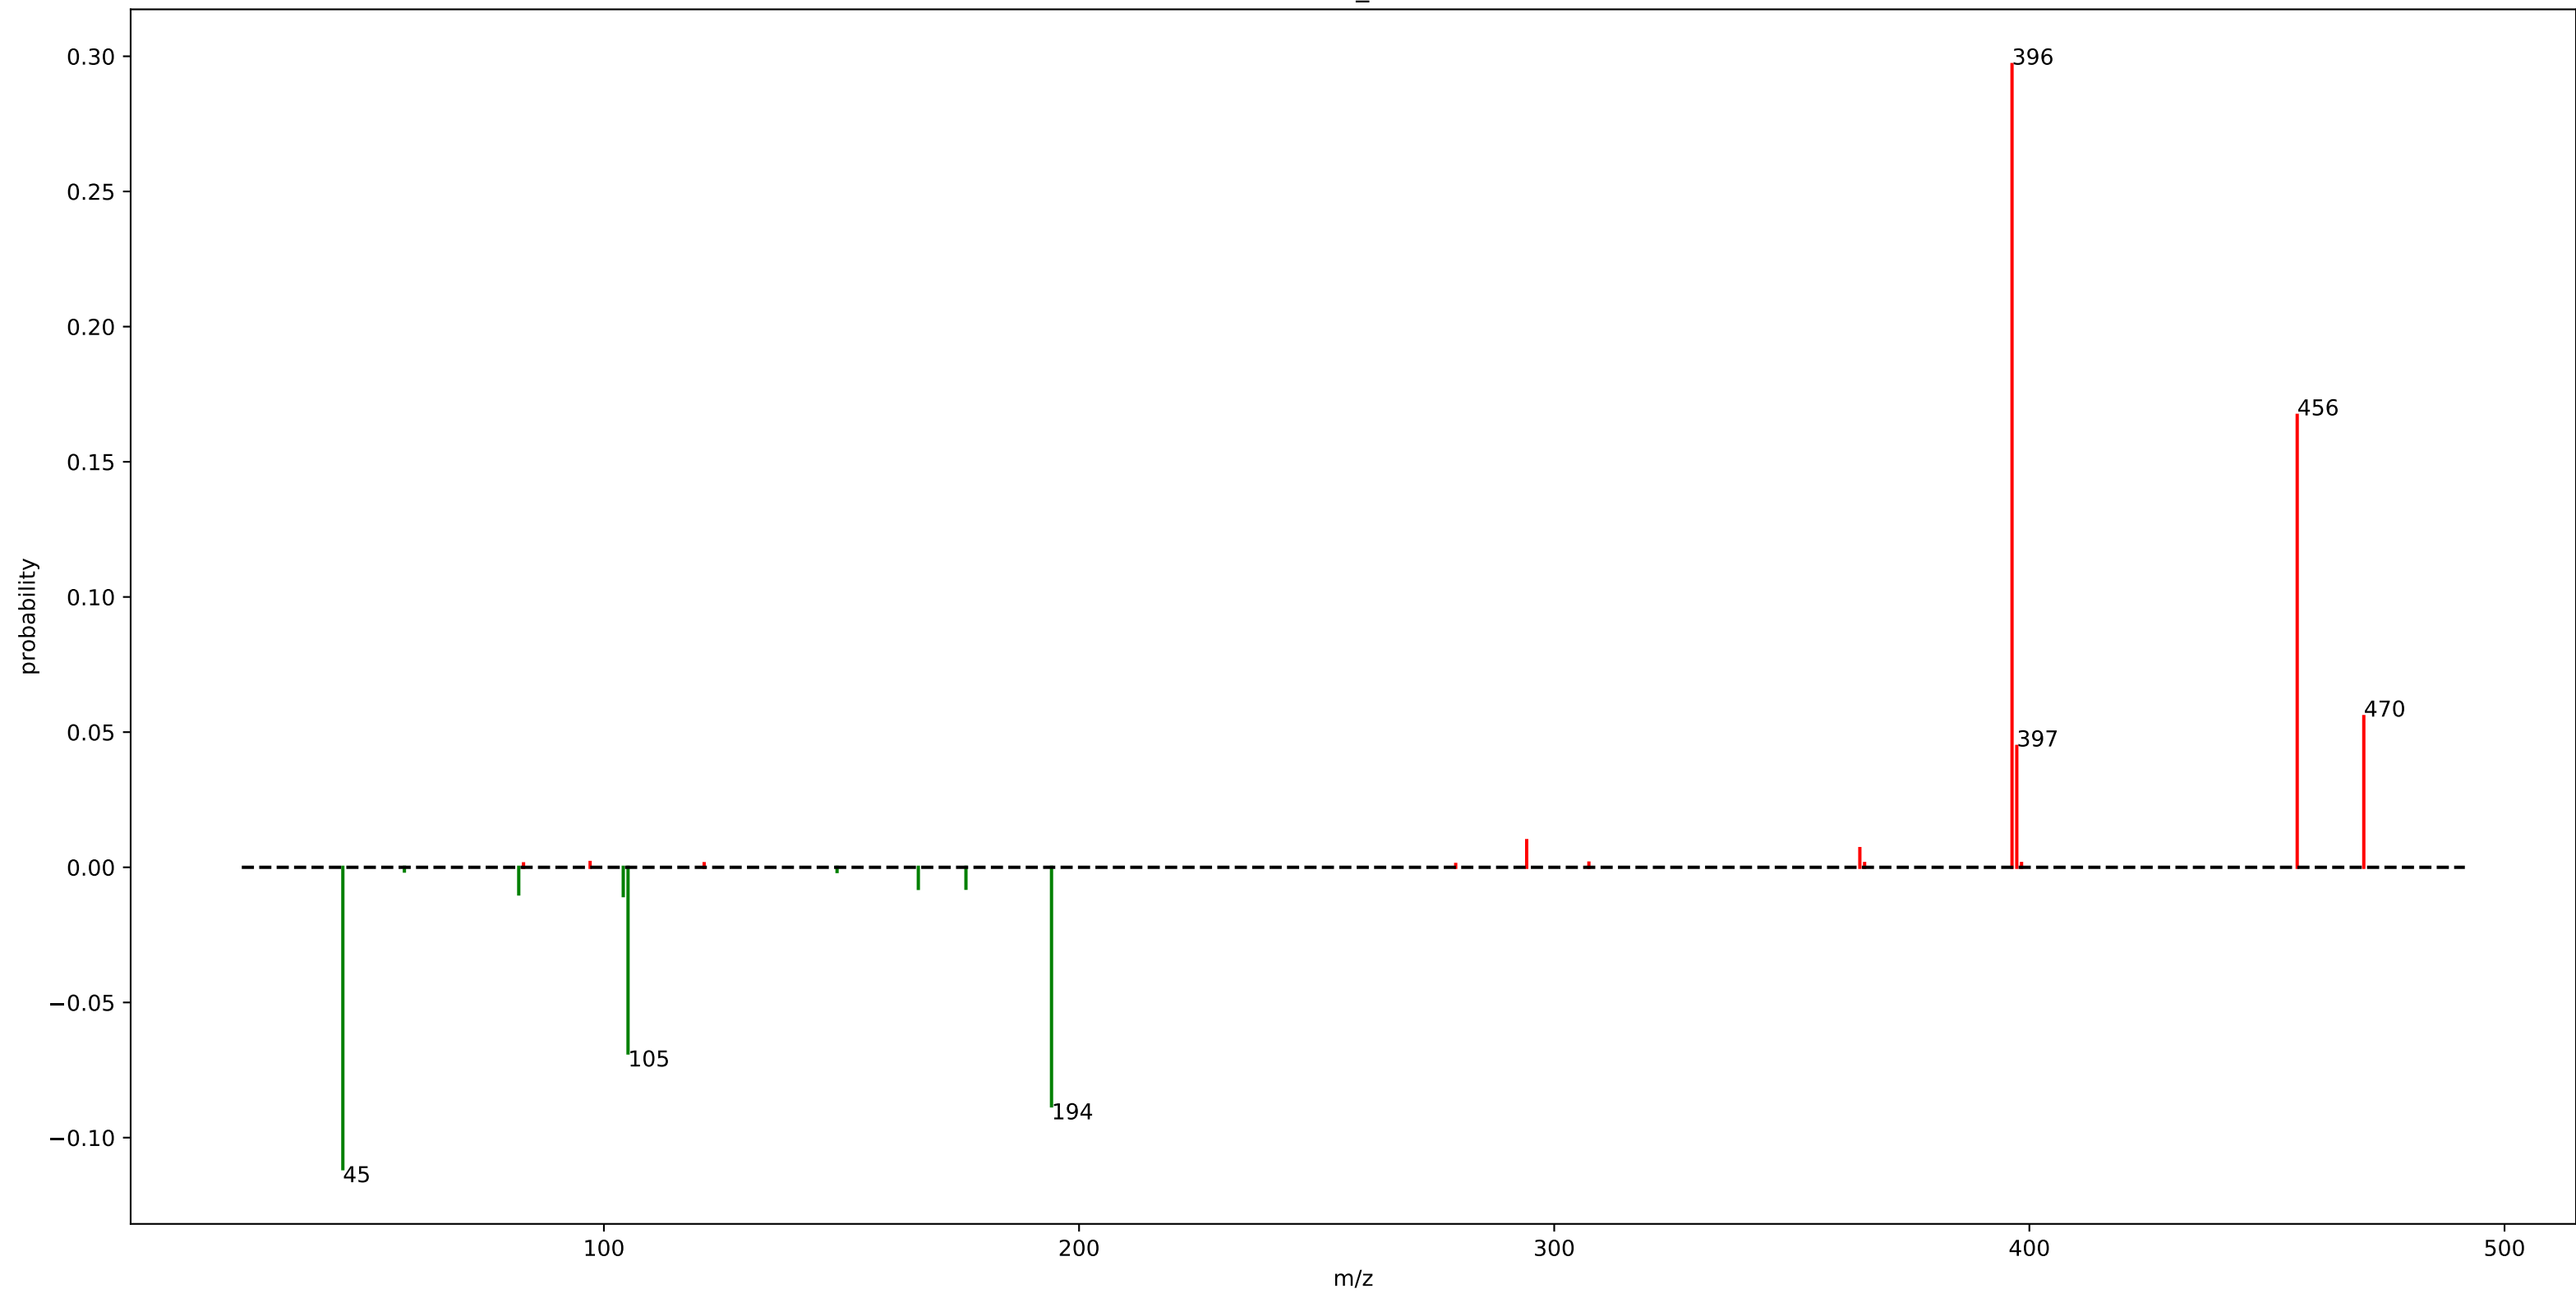

## motif\_413

|                   |        |
|-------------------|--------|
| fragment_396.3475 | : 0.30 |
| fragment_456.3675 | : 0.17 |
| loss_45.0575      | : 0.11 |
| loss_194.2025     | : 0.09 |
| loss_105.0775     | : 0.07 |
| fragment_470.3825 | : 0.06 |
| fragment_397.3525 | : 0.04 |
| loss_104.0725     | : 0.01 |
| fragment_294.2075 | : 0.01 |
| loss_82.0775      | : 0.01 |
| loss_166.1725     | : 0.01 |
| loss_176.1925     | : 0.01 |
| fragment_364.3225 | : 0.01 |

euphorbia\_motif\_64.m2m

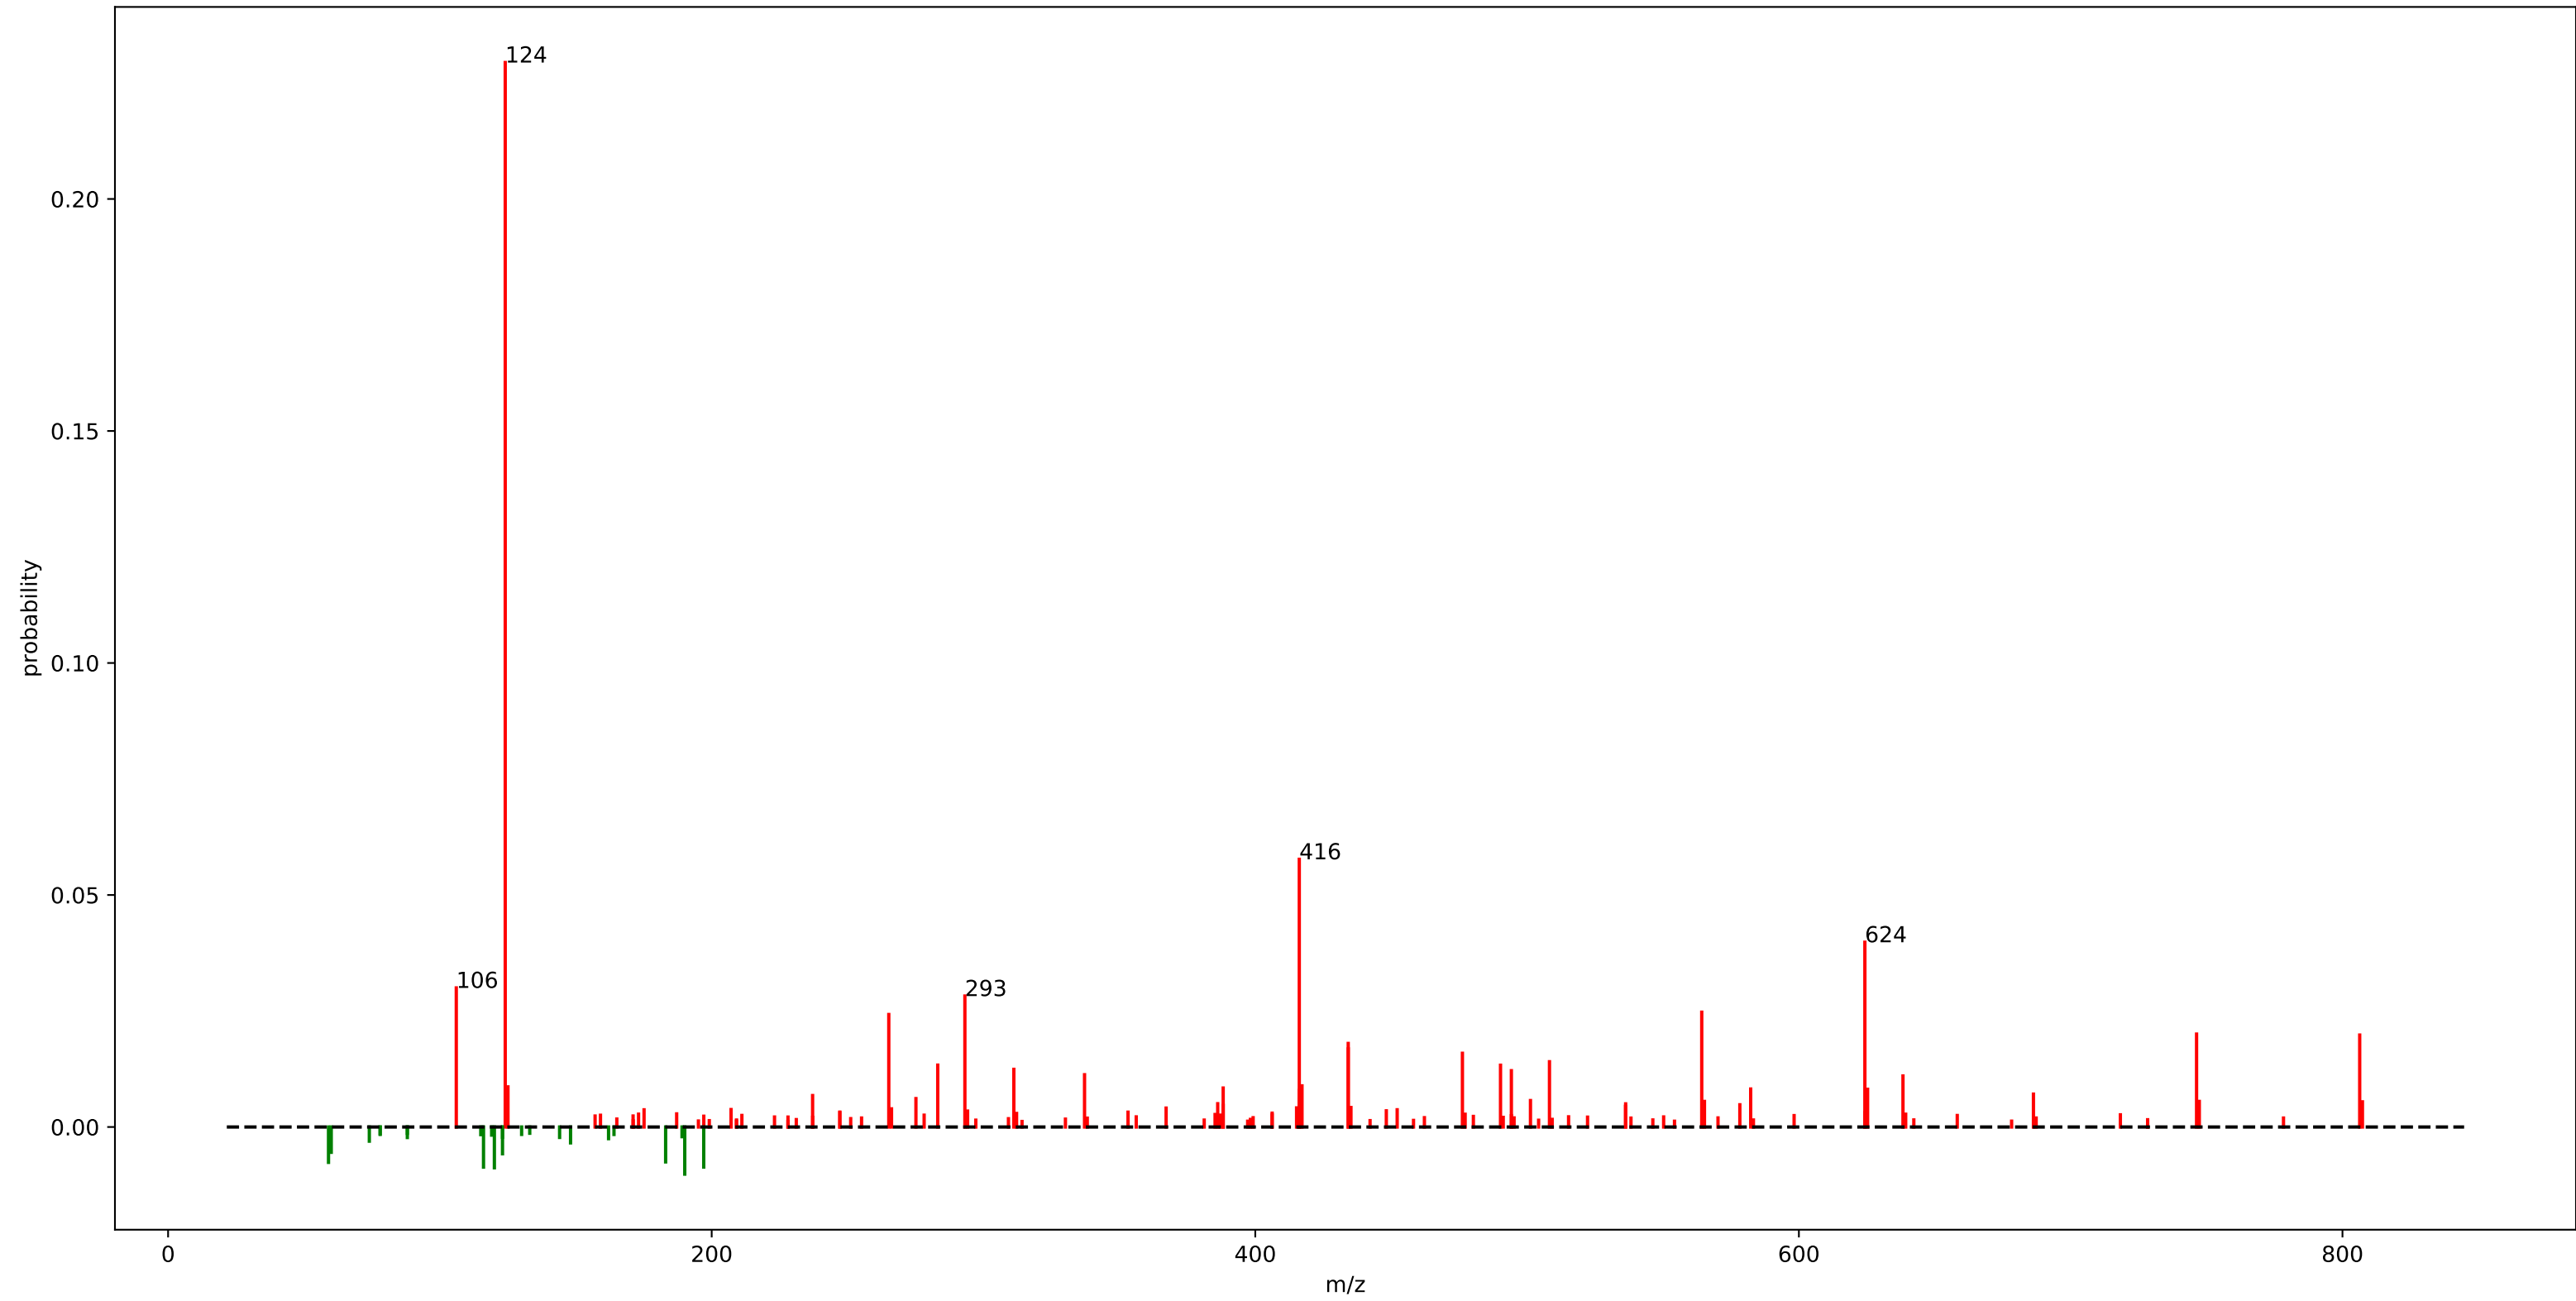

# euphorbia\_motif\_64.m2m

|                   |        |                   |        |                   |        |
|-------------------|--------|-------------------|--------|-------------------|--------|
| fragment_124.0375 | : 0.23 | fragment_417.1875 | : 0.01 | fragment_807.3425 | : 0.01 |
| fragment_416.1875 | : 0.06 | loss_120.0425     | : 0.01 | fragment_386.1725 | : 0.01 |
| fragment_624.2775 | : 0.04 | loss_116.0475     | : 0.01 |                   |        |
| fragment_106.0275 | : 0.03 | fragment_125.0425 | : 0.01 |                   |        |
| fragment_293.1525 | : 0.03 | loss_197.0675     | : 0.01 |                   |        |
| fragment_564.2575 | : 0.02 | fragment_388.1875 | : 0.01 |                   |        |
| fragment_265.1575 | : 0.02 | fragment_582.2675 | : 0.01 |                   |        |
| fragment_746.3175 | : 0.02 | fragment_625.2825 | : 0.01 |                   |        |
| fragment_806.3375 | : 0.02 | fragment_416.1825 | : 0.01 |                   |        |
| fragment_434.1925 | : 0.02 | loss_59.0175      | : 0.01 |                   |        |
| fragment_434.1975 | : 0.02 | loss_183.0525     | : 0.01 |                   |        |
| fragment_476.2075 | : 0.02 | fragment_686.2975 | : 0.01 |                   |        |
| fragment_508.2325 | : 0.01 | fragment_237.1275 | : 0.01 |                   |        |
| fragment_283.1675 | : 0.01 | fragment_275.1425 | : 0.01 |                   |        |
| fragment_490.2225 | : 0.01 | fragment_416.1925 | : 0.01 |                   |        |
| fragment_311.1625 | : 0.01 | loss_123.0325     | : 0.01 |                   |        |
| fragment_494.2175 | : 0.01 | fragment_501.2425 | : 0.01 |                   |        |
| fragment_337.1775 | : 0.01 | fragment_747.3225 | : 0.01 |                   |        |
| fragment_638.2975 | : 0.01 | fragment_565.2625 | : 0.01 |                   |        |
| loss_190.0875     | : 0.01 | loss_60.0225      | : 0.01 |                   |        |

motif\_411

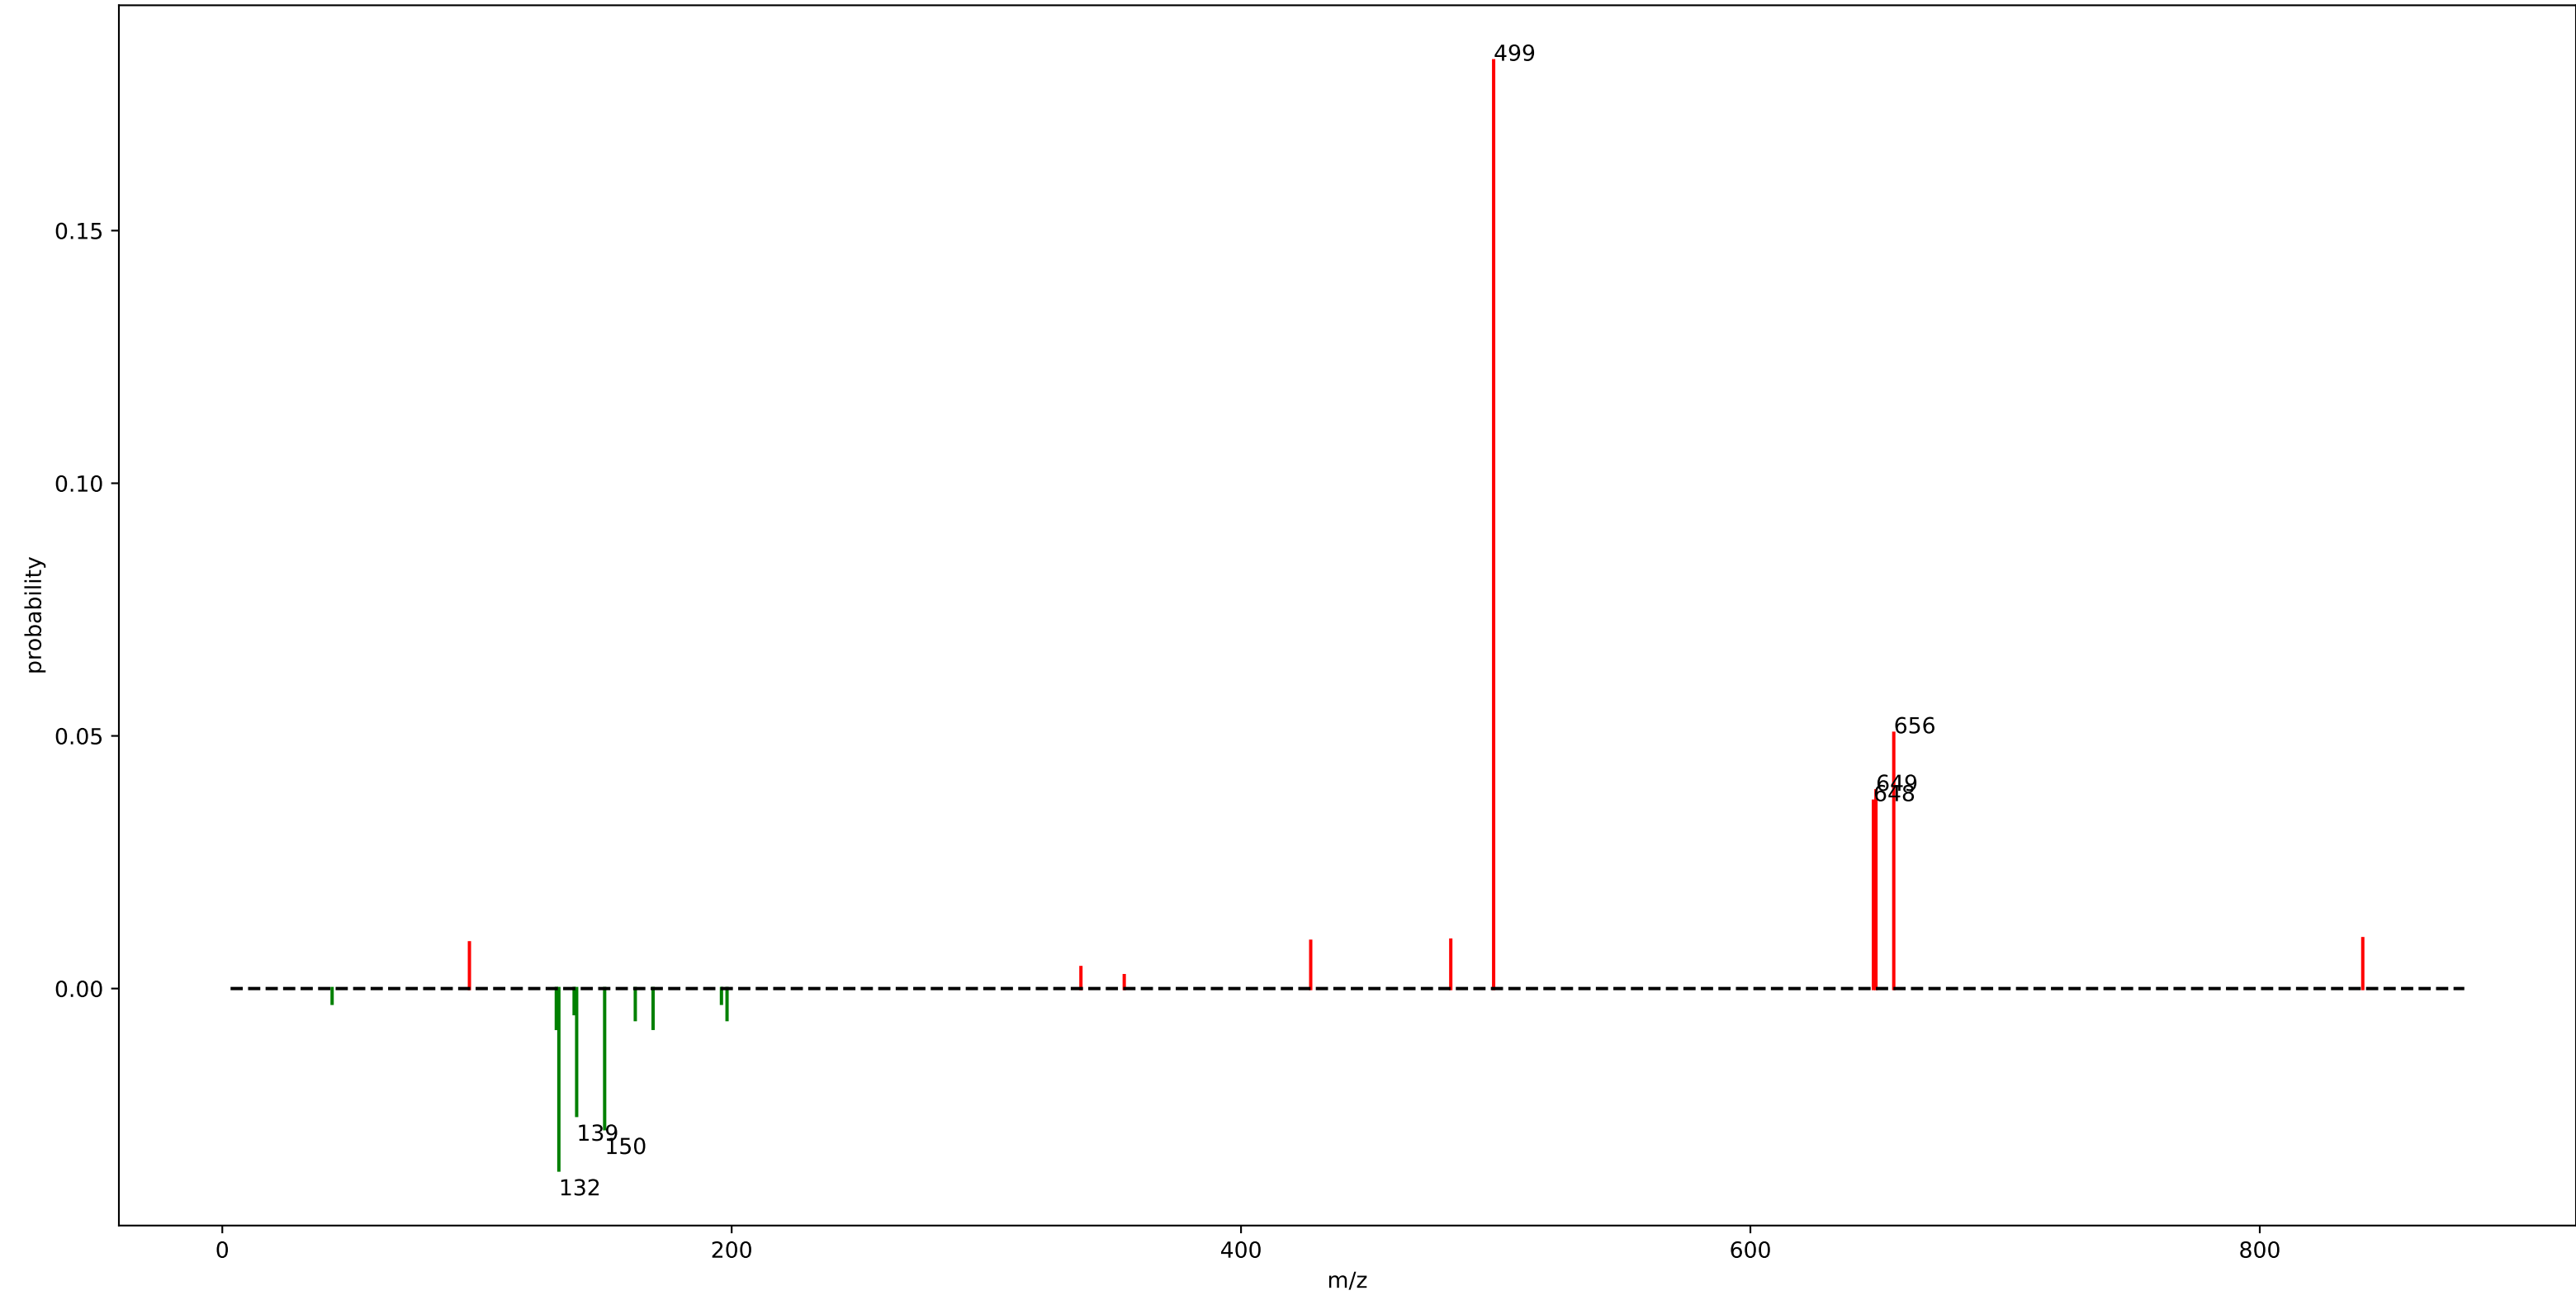

## motif\_411

|                   |        |
|-------------------|--------|
| fragment_499.1825 | : 0.18 |
| fragment_656.2925 | : 0.05 |
| fragment_649.3025 | : 0.04 |
| fragment_648.2975 | : 0.04 |
| loss_132.1475     | : 0.04 |
| loss_150.1275     | : 0.03 |
| loss_139.1375     | : 0.03 |
| fragment_840.4475 | : 0.01 |
| fragment_482.3575 | : 0.01 |
| fragment_427.3575 | : 0.01 |
| fragment_97.0275  | : 0.01 |
| loss_131.1425     | : 0.01 |
| loss_169.1475     | : 0.01 |
| loss_198.1775     | : 0.01 |
| loss_162.1575     | : 0.01 |



motif\_416

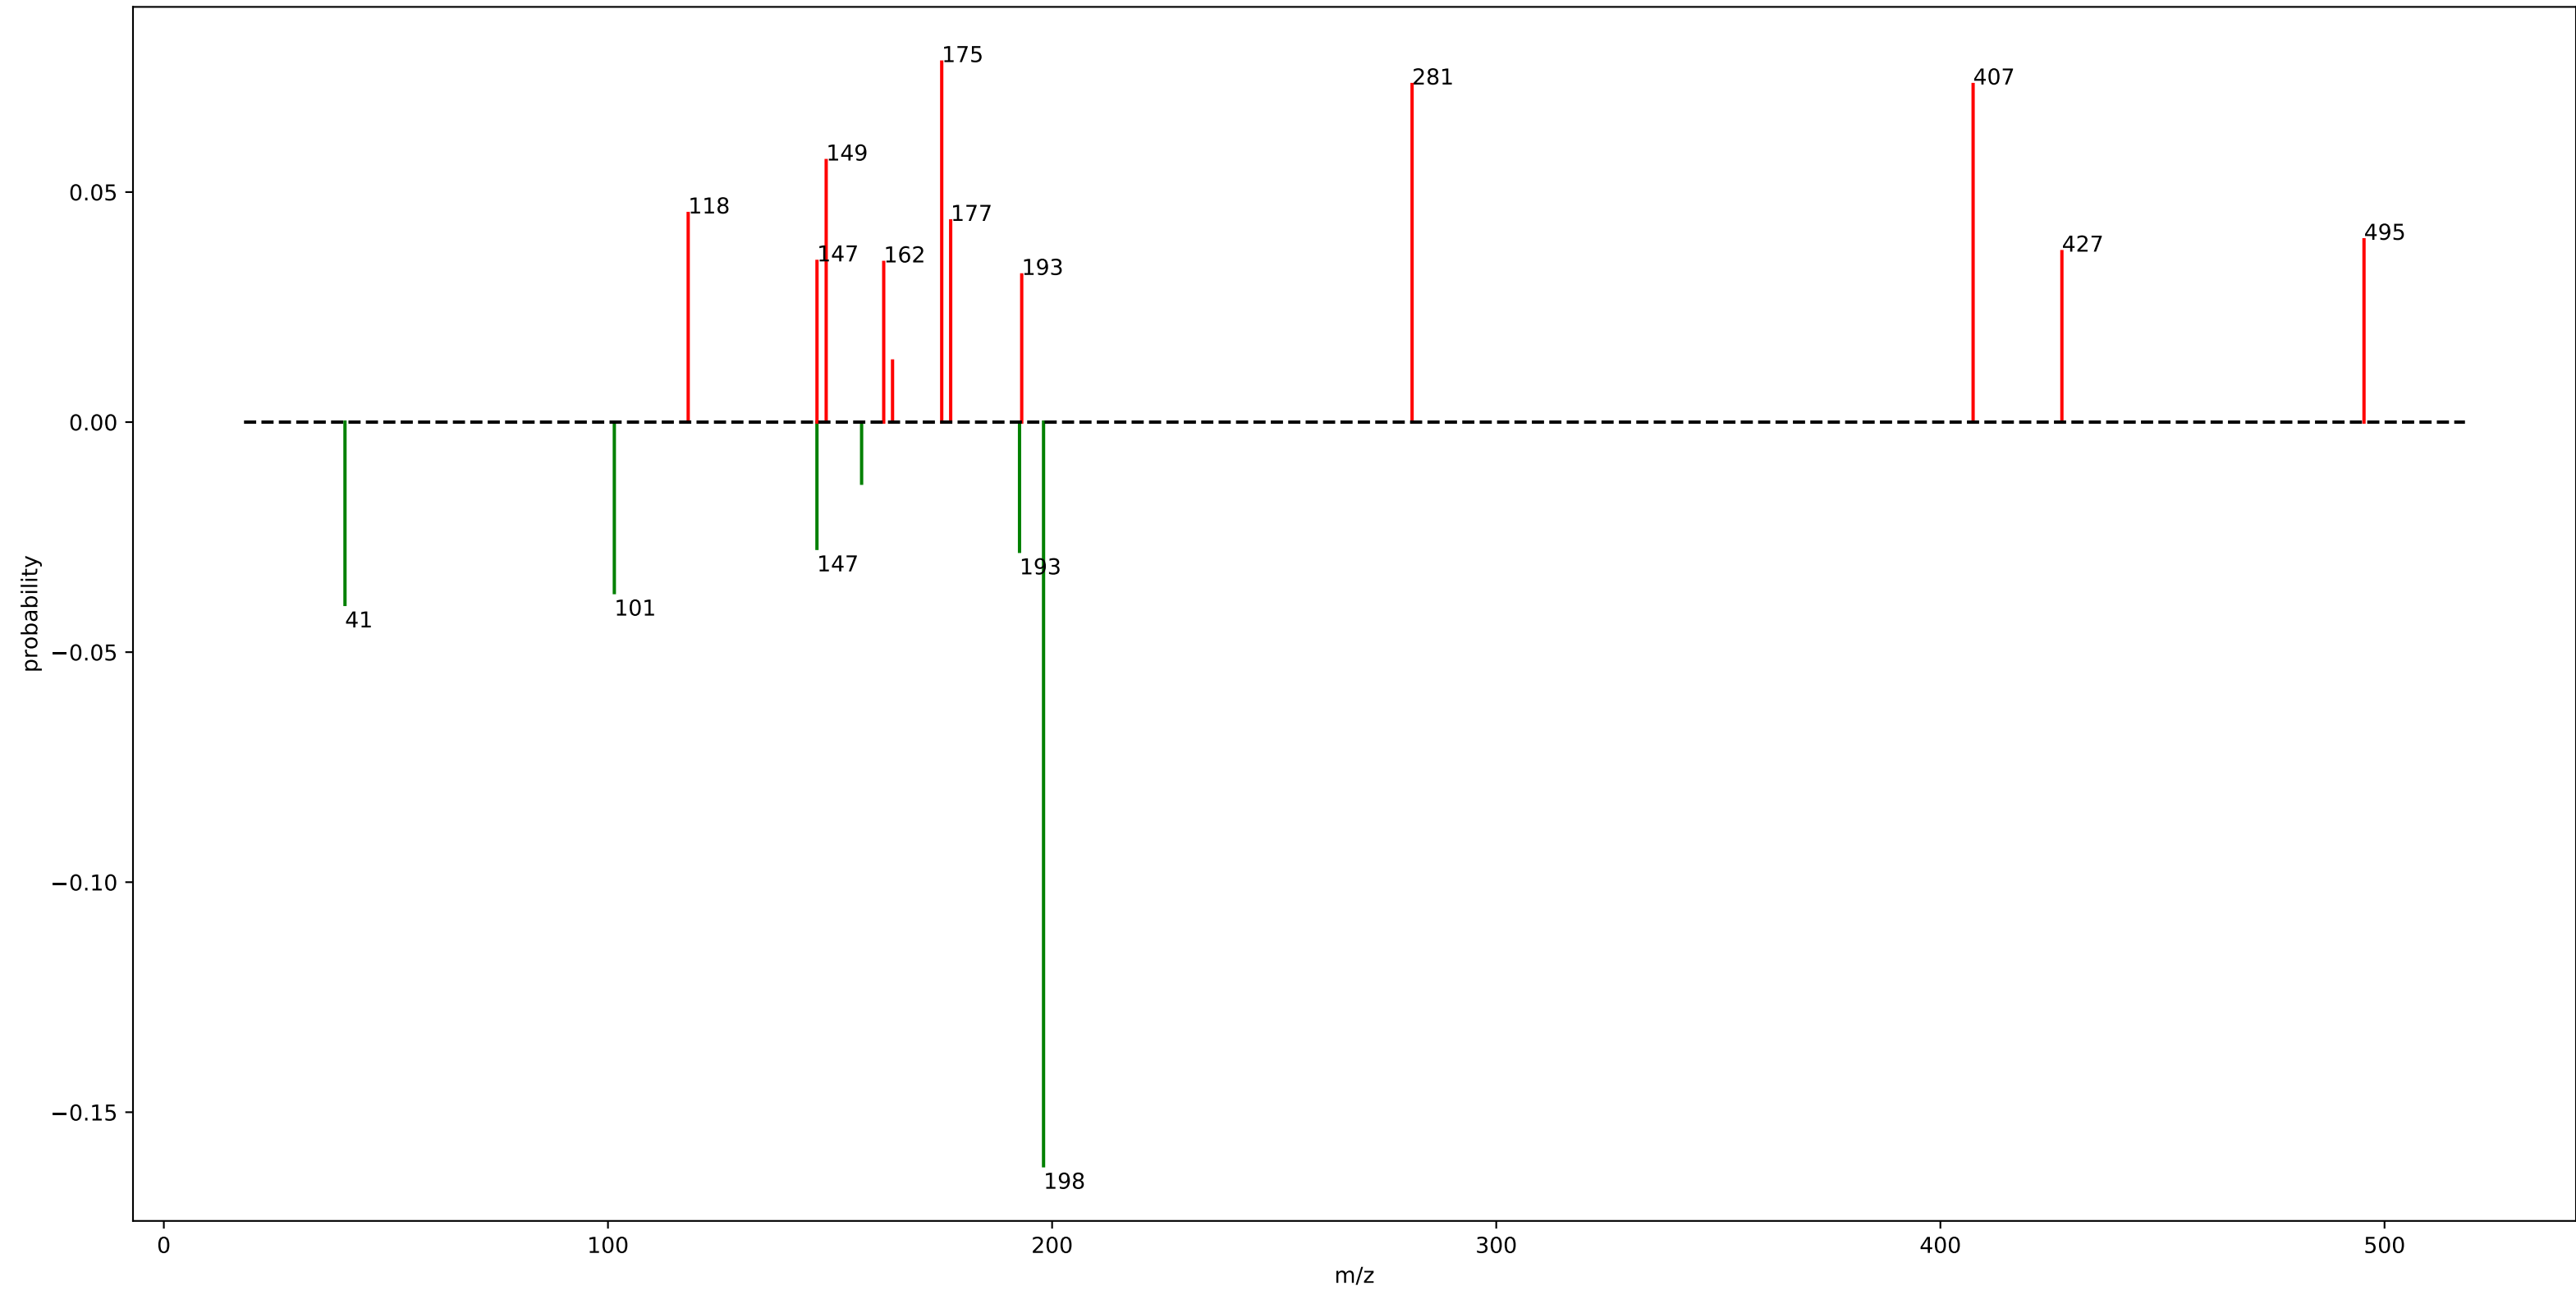

## motif\_416

|                   |        |
|-------------------|--------|
| loss_198.0725     | : 0.16 |
| fragment_175.1475 | : 0.08 |
| fragment_281.0475 | : 0.07 |
| fragment_407.3675 | : 0.07 |
| fragment_149.1325 | : 0.06 |
| fragment_118.0625 | : 0.05 |
| fragment_177.1625 | : 0.04 |
| fragment_495.3775 | : 0.04 |
| loss_40.7875      | : 0.04 |
| loss_101.4325     | : 0.04 |
| fragment_427.3575 | : 0.04 |
| fragment_147.0625 | : 0.03 |
| fragment_162.0875 | : 0.03 |
| fragment_193.1575 | : 0.03 |
| loss_192.6625     | : 0.03 |
| loss_147.0525     | : 0.03 |
| loss_157.1075     | : 0.01 |
| fragment_164.0725 | : 0.01 |

motif\_417

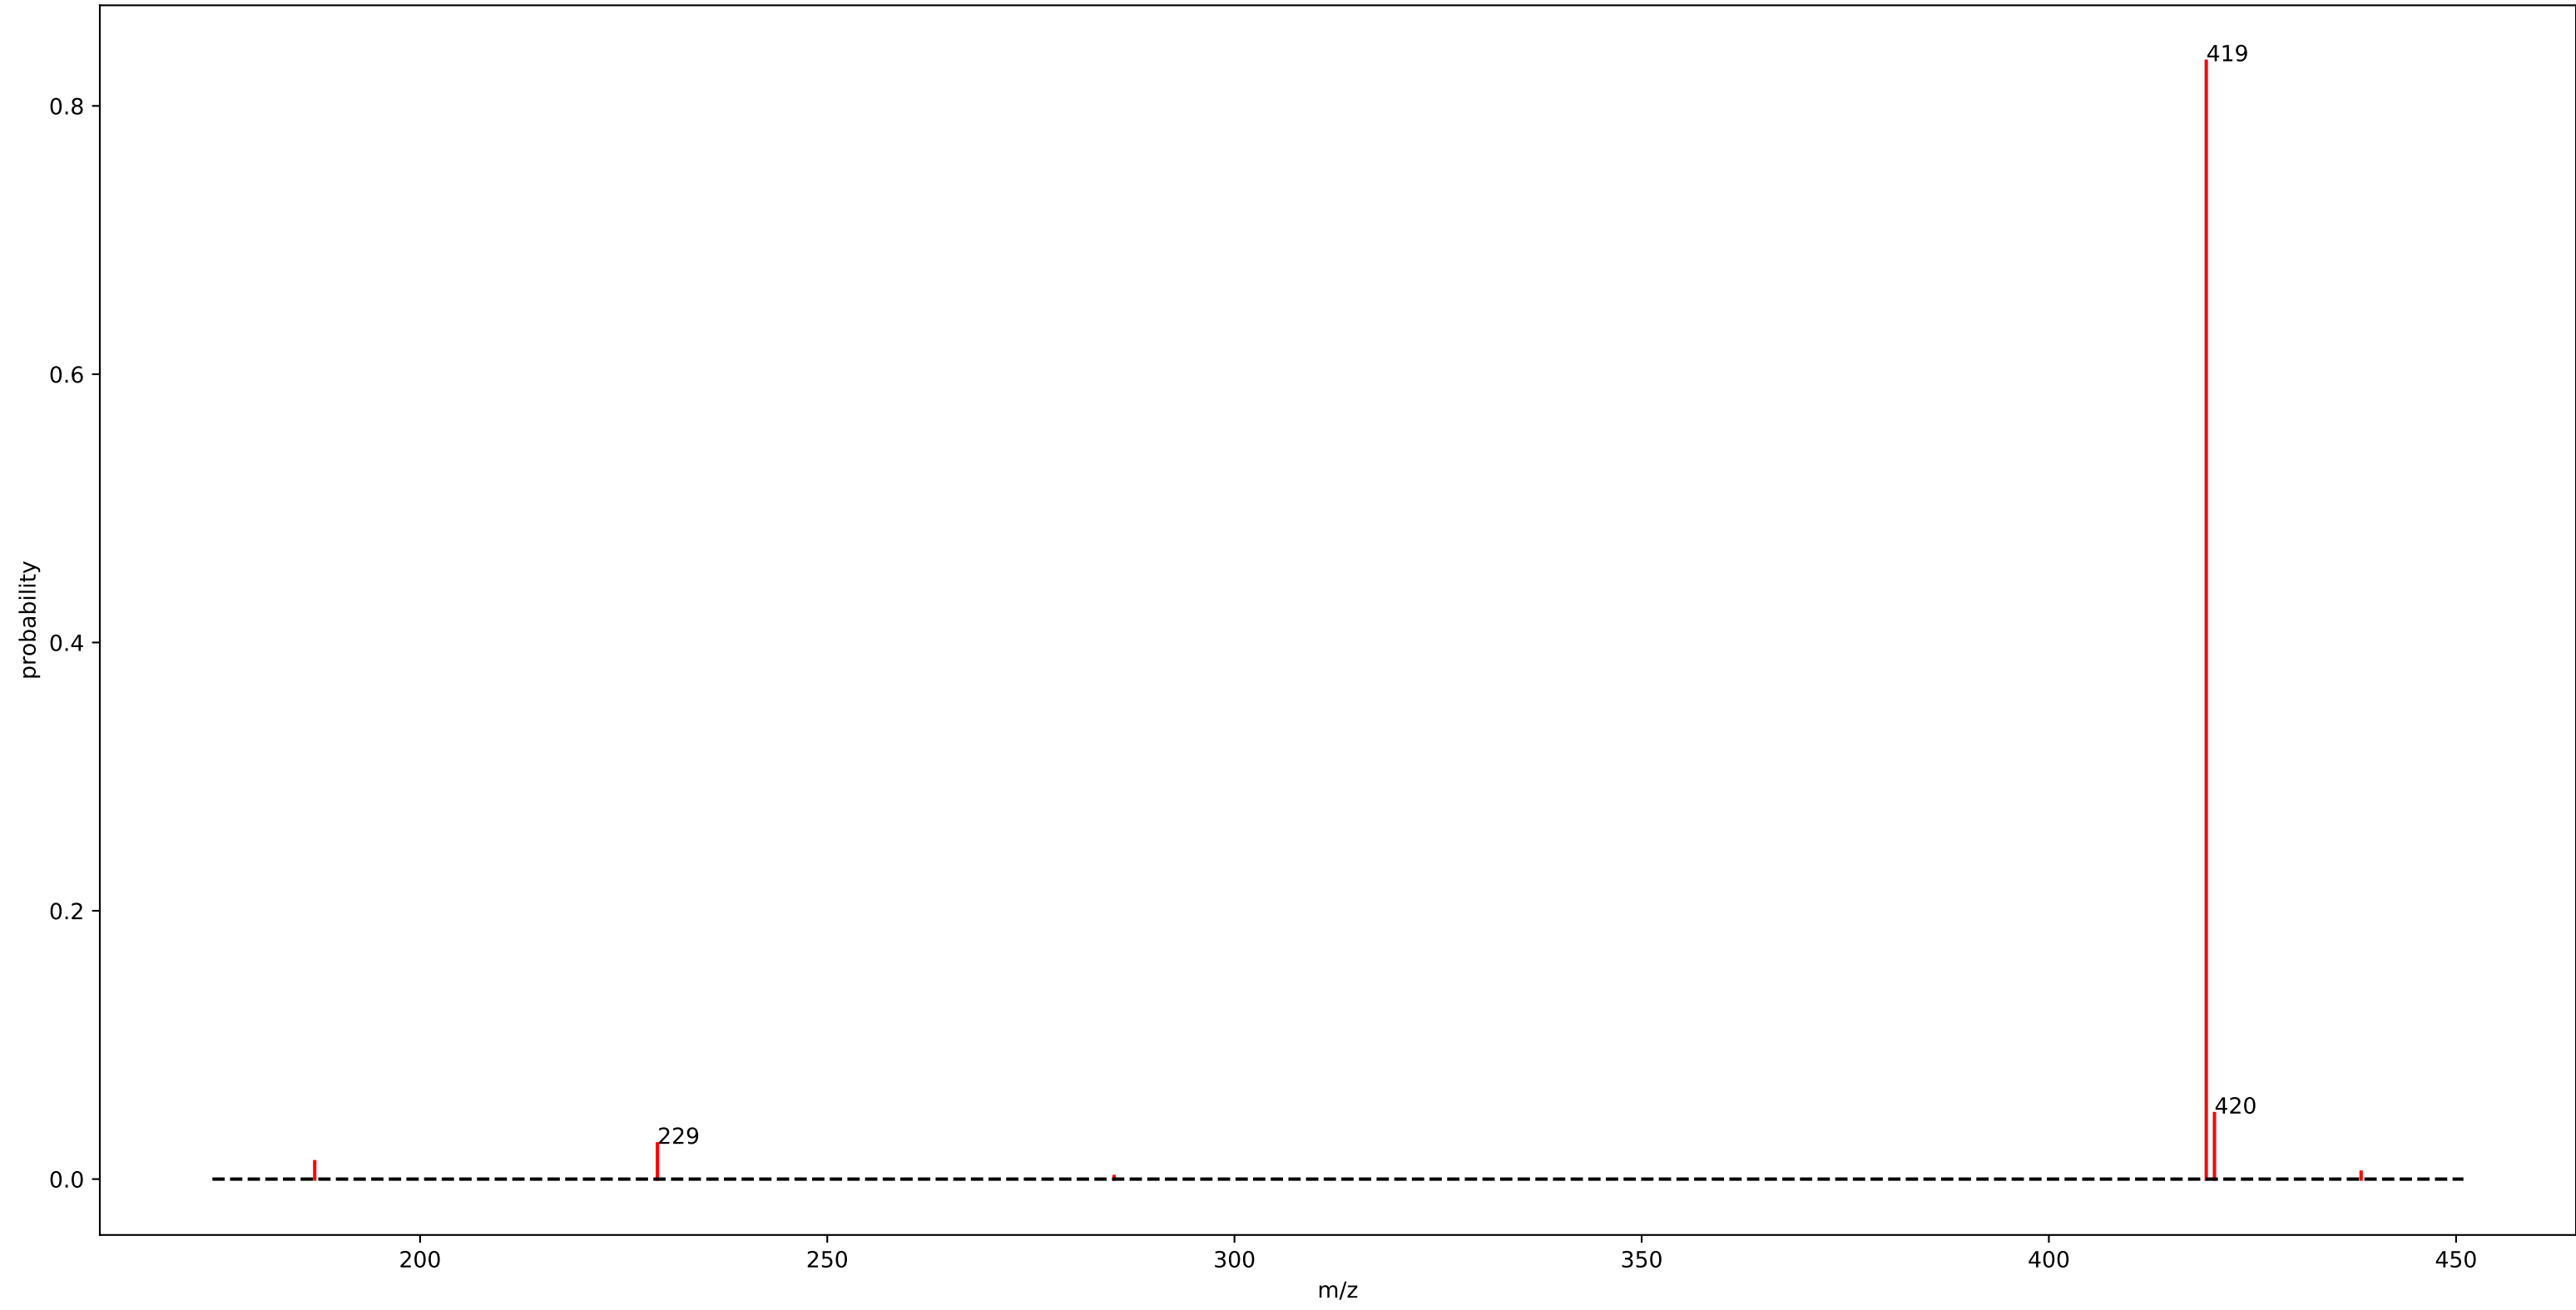

## motif\_417

|                   |        |
|-------------------|--------|
| fragment_419.3275 | : 0.83 |
| fragment_420.3325 | : 0.05 |
| fragment_229.1425 | : 0.03 |
| fragment_187.0625 | : 0.01 |
| fragment_438.3425 | : 0.01 |

motif\_414

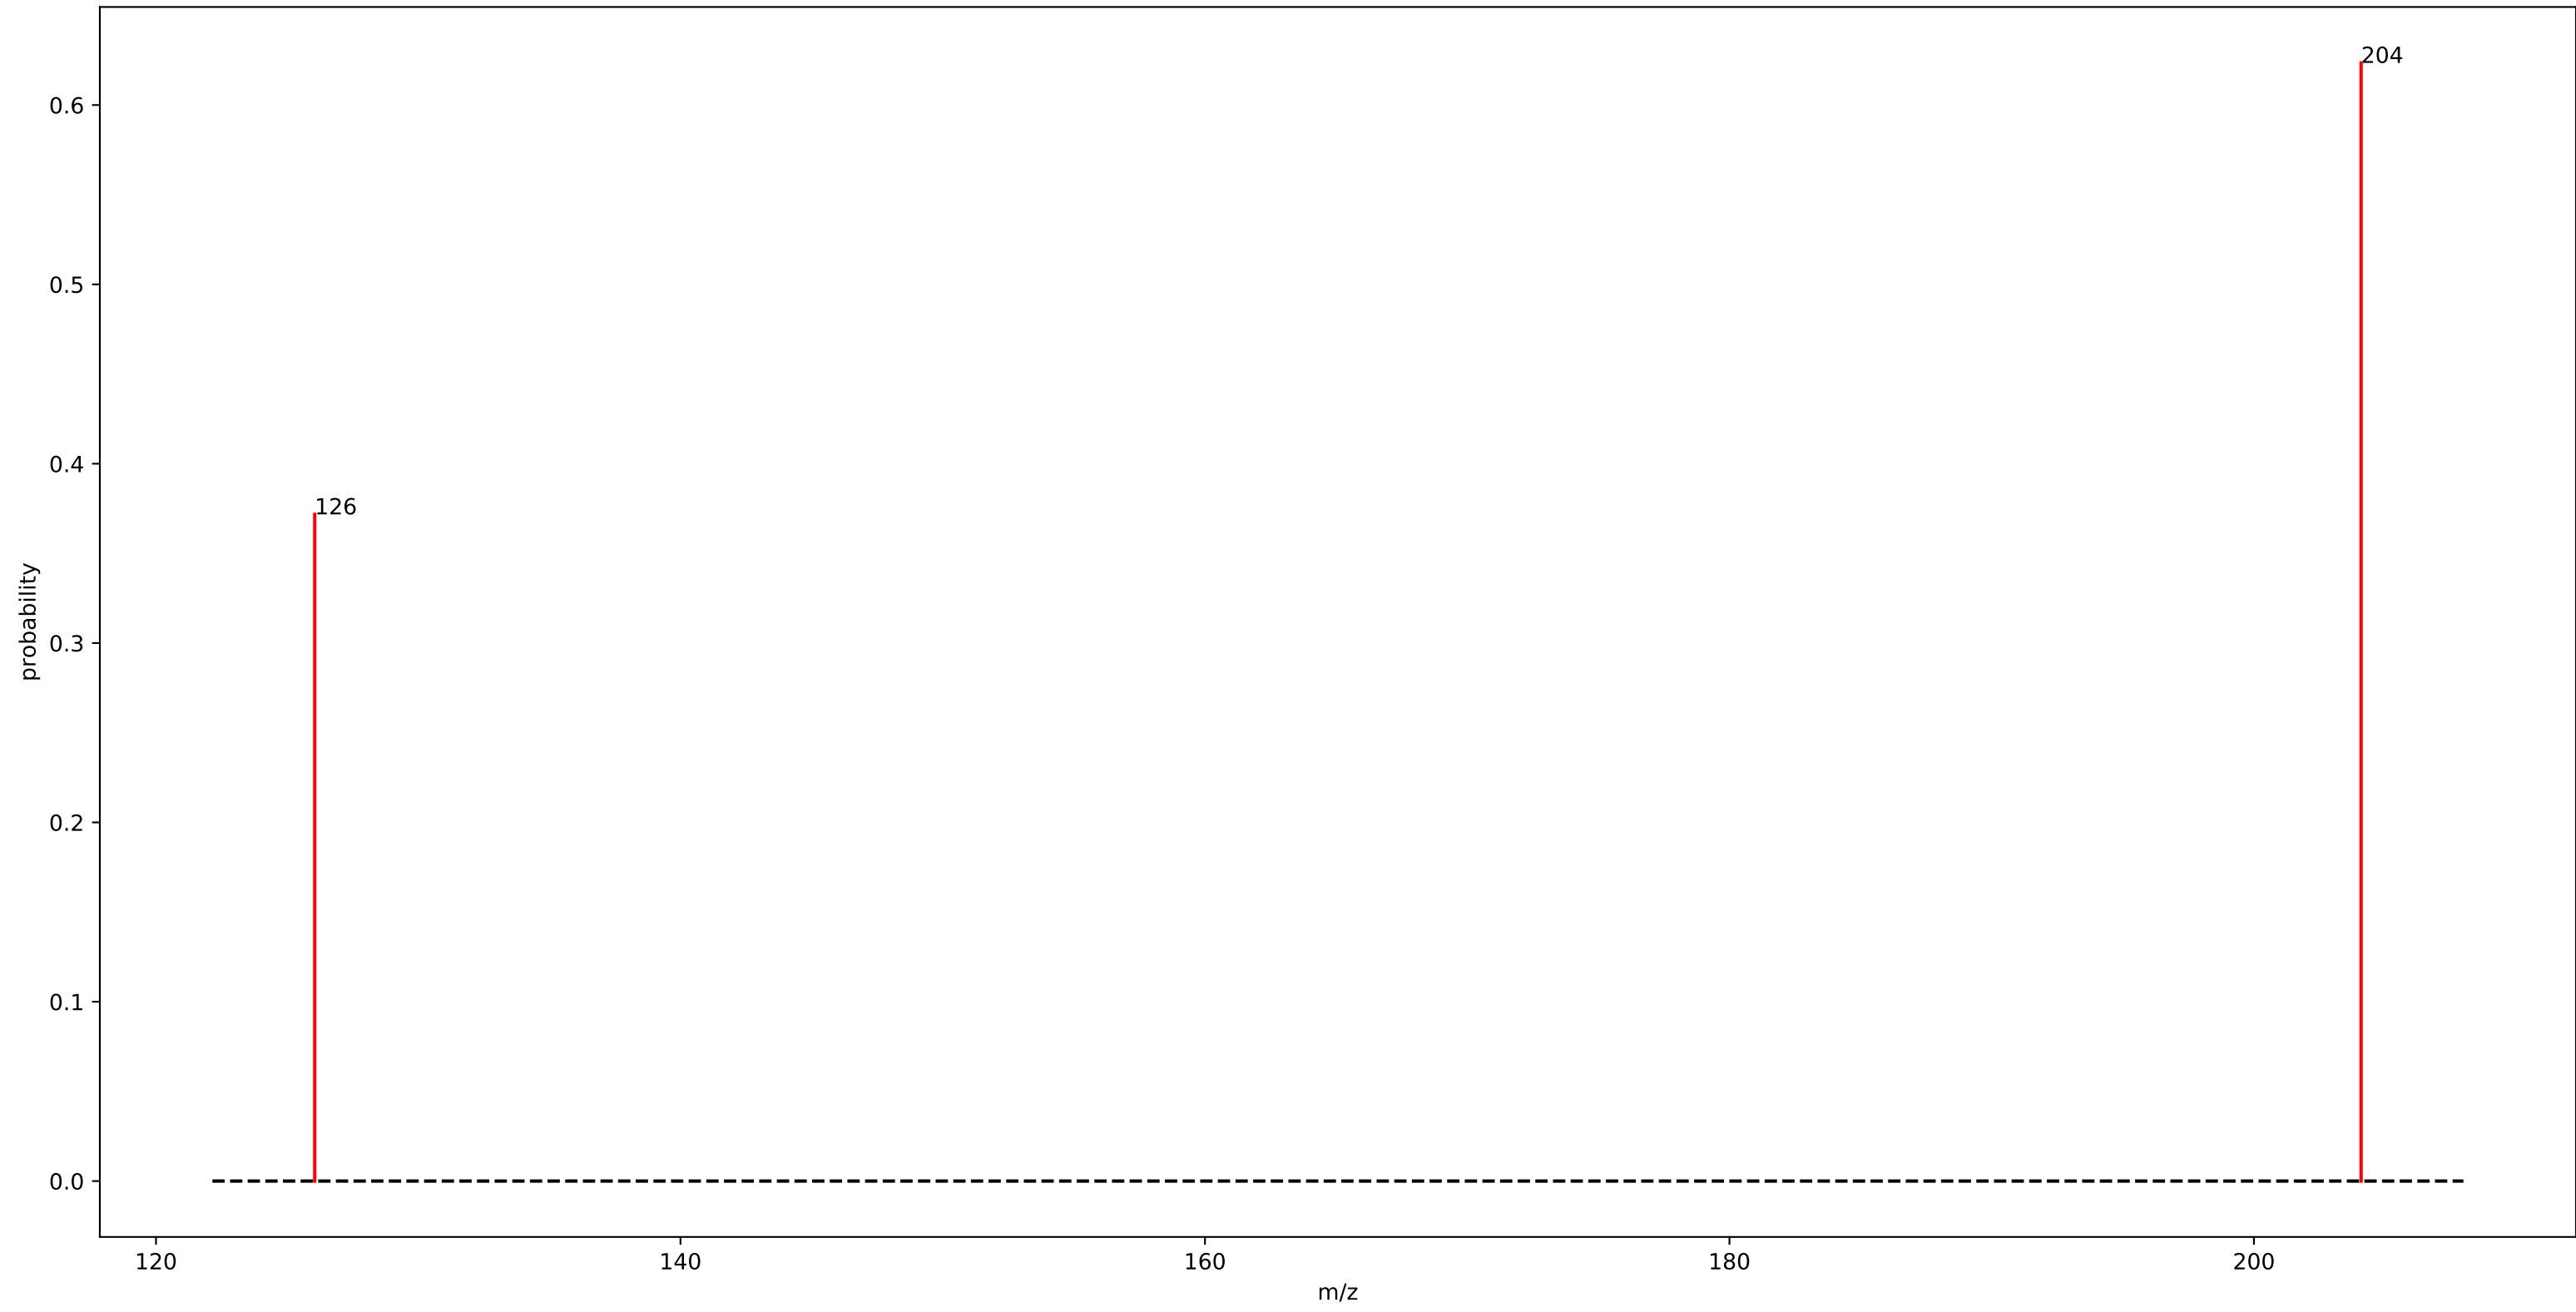

## motif\_414

fragment\_204.0875 : 0.62  
fragment\_126.0525 : 0.37

motif\_415

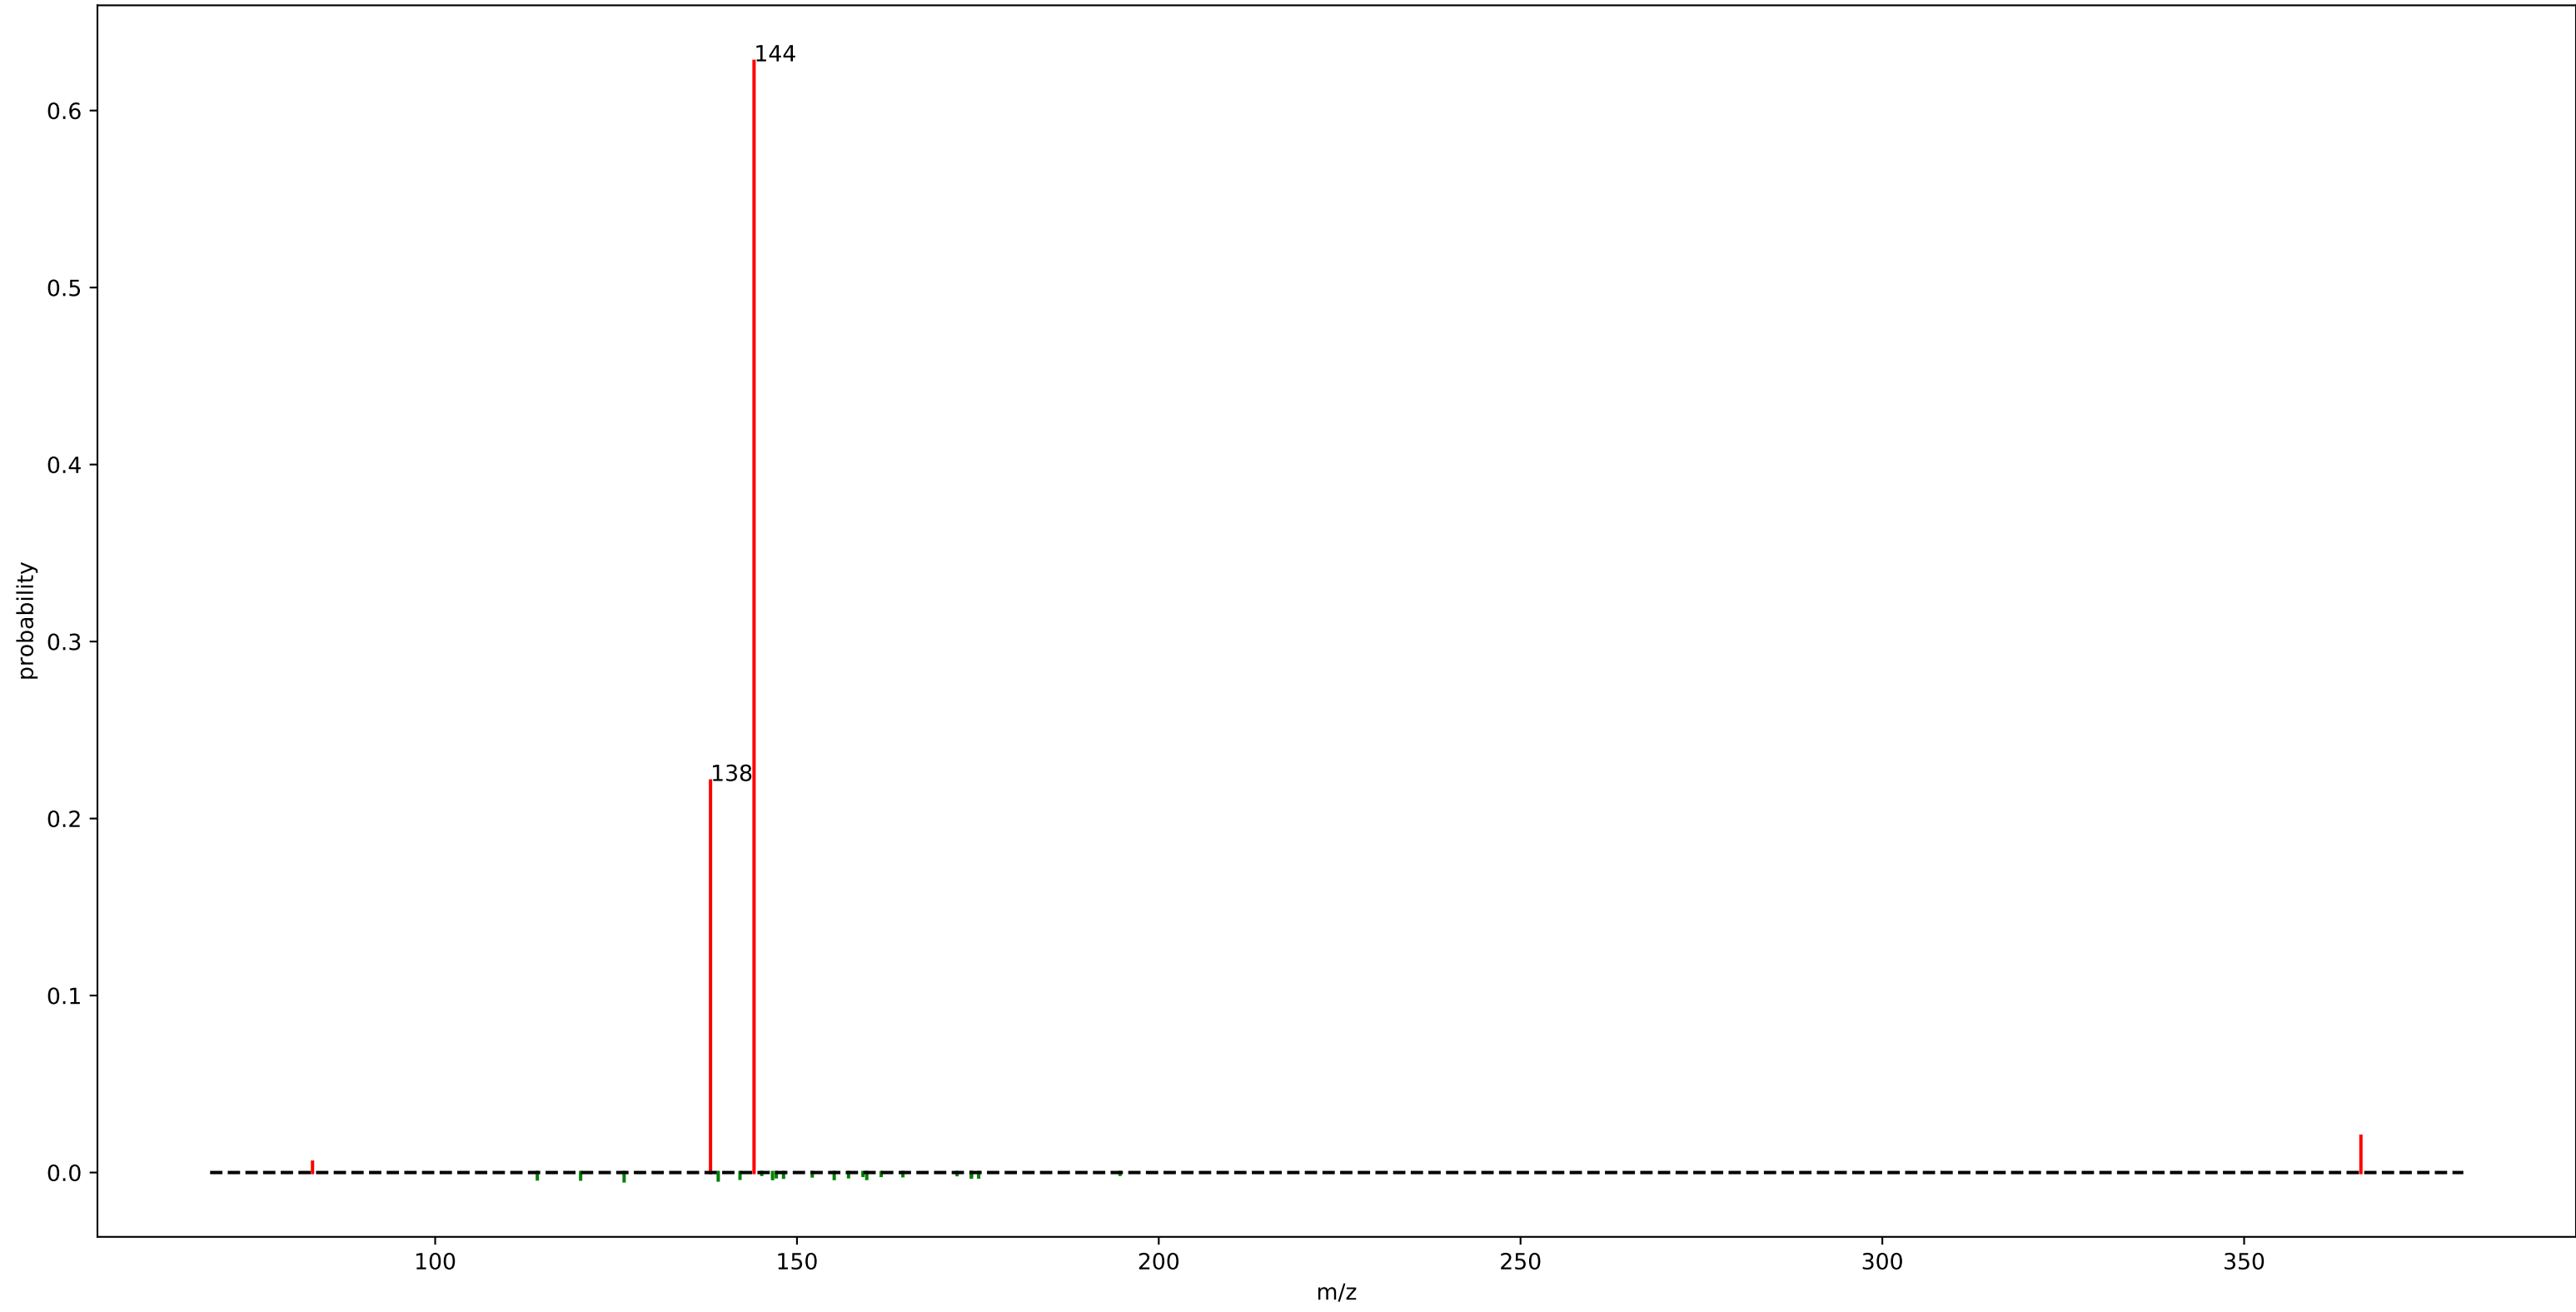

## motif\_415

|                   |        |
|-------------------|--------|
| fragment_144.0675 | : 0.63 |
| fragment_138.0525 | : 0.22 |
| fragment_366.1425 | : 0.02 |
| fragment_83.0475  | : 0.01 |



gnps\_motif\_51.m2m

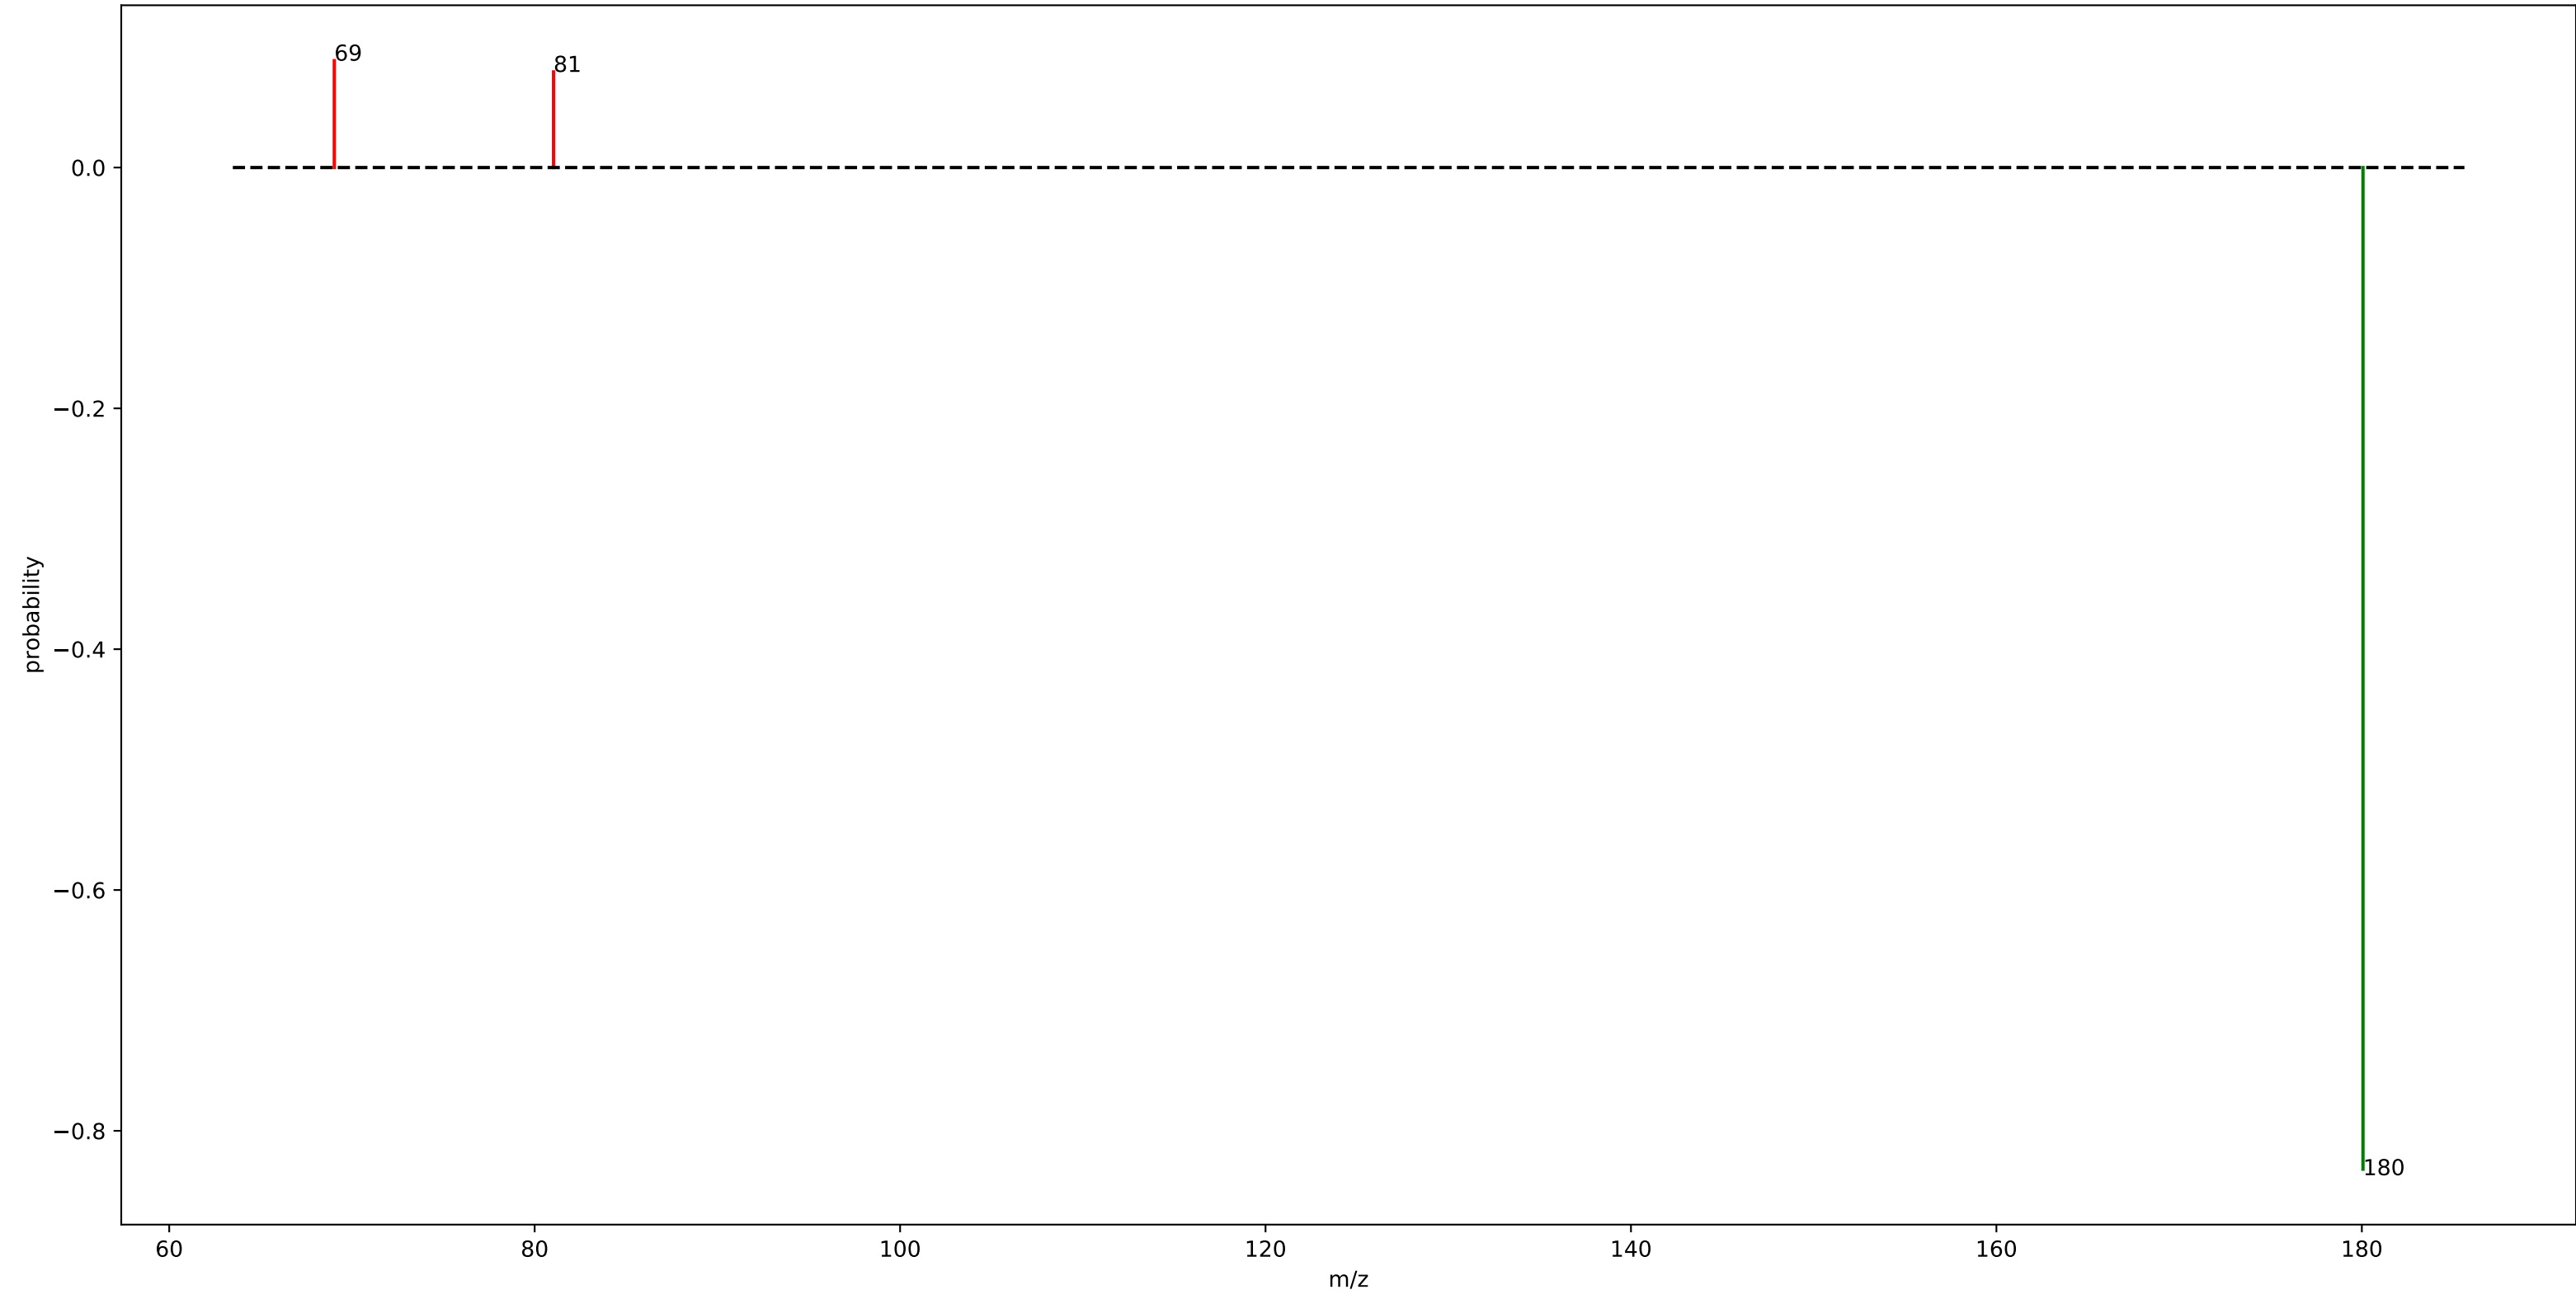

# gnps\_motif\_51.m2m

|                  |        |
|------------------|--------|
| loss_180.0625    | : 0.83 |
| fragment_69.0325 | : 0.09 |
| fragment_81.0325 | : 0.08 |

rhabdus\_motif\_151.m2m

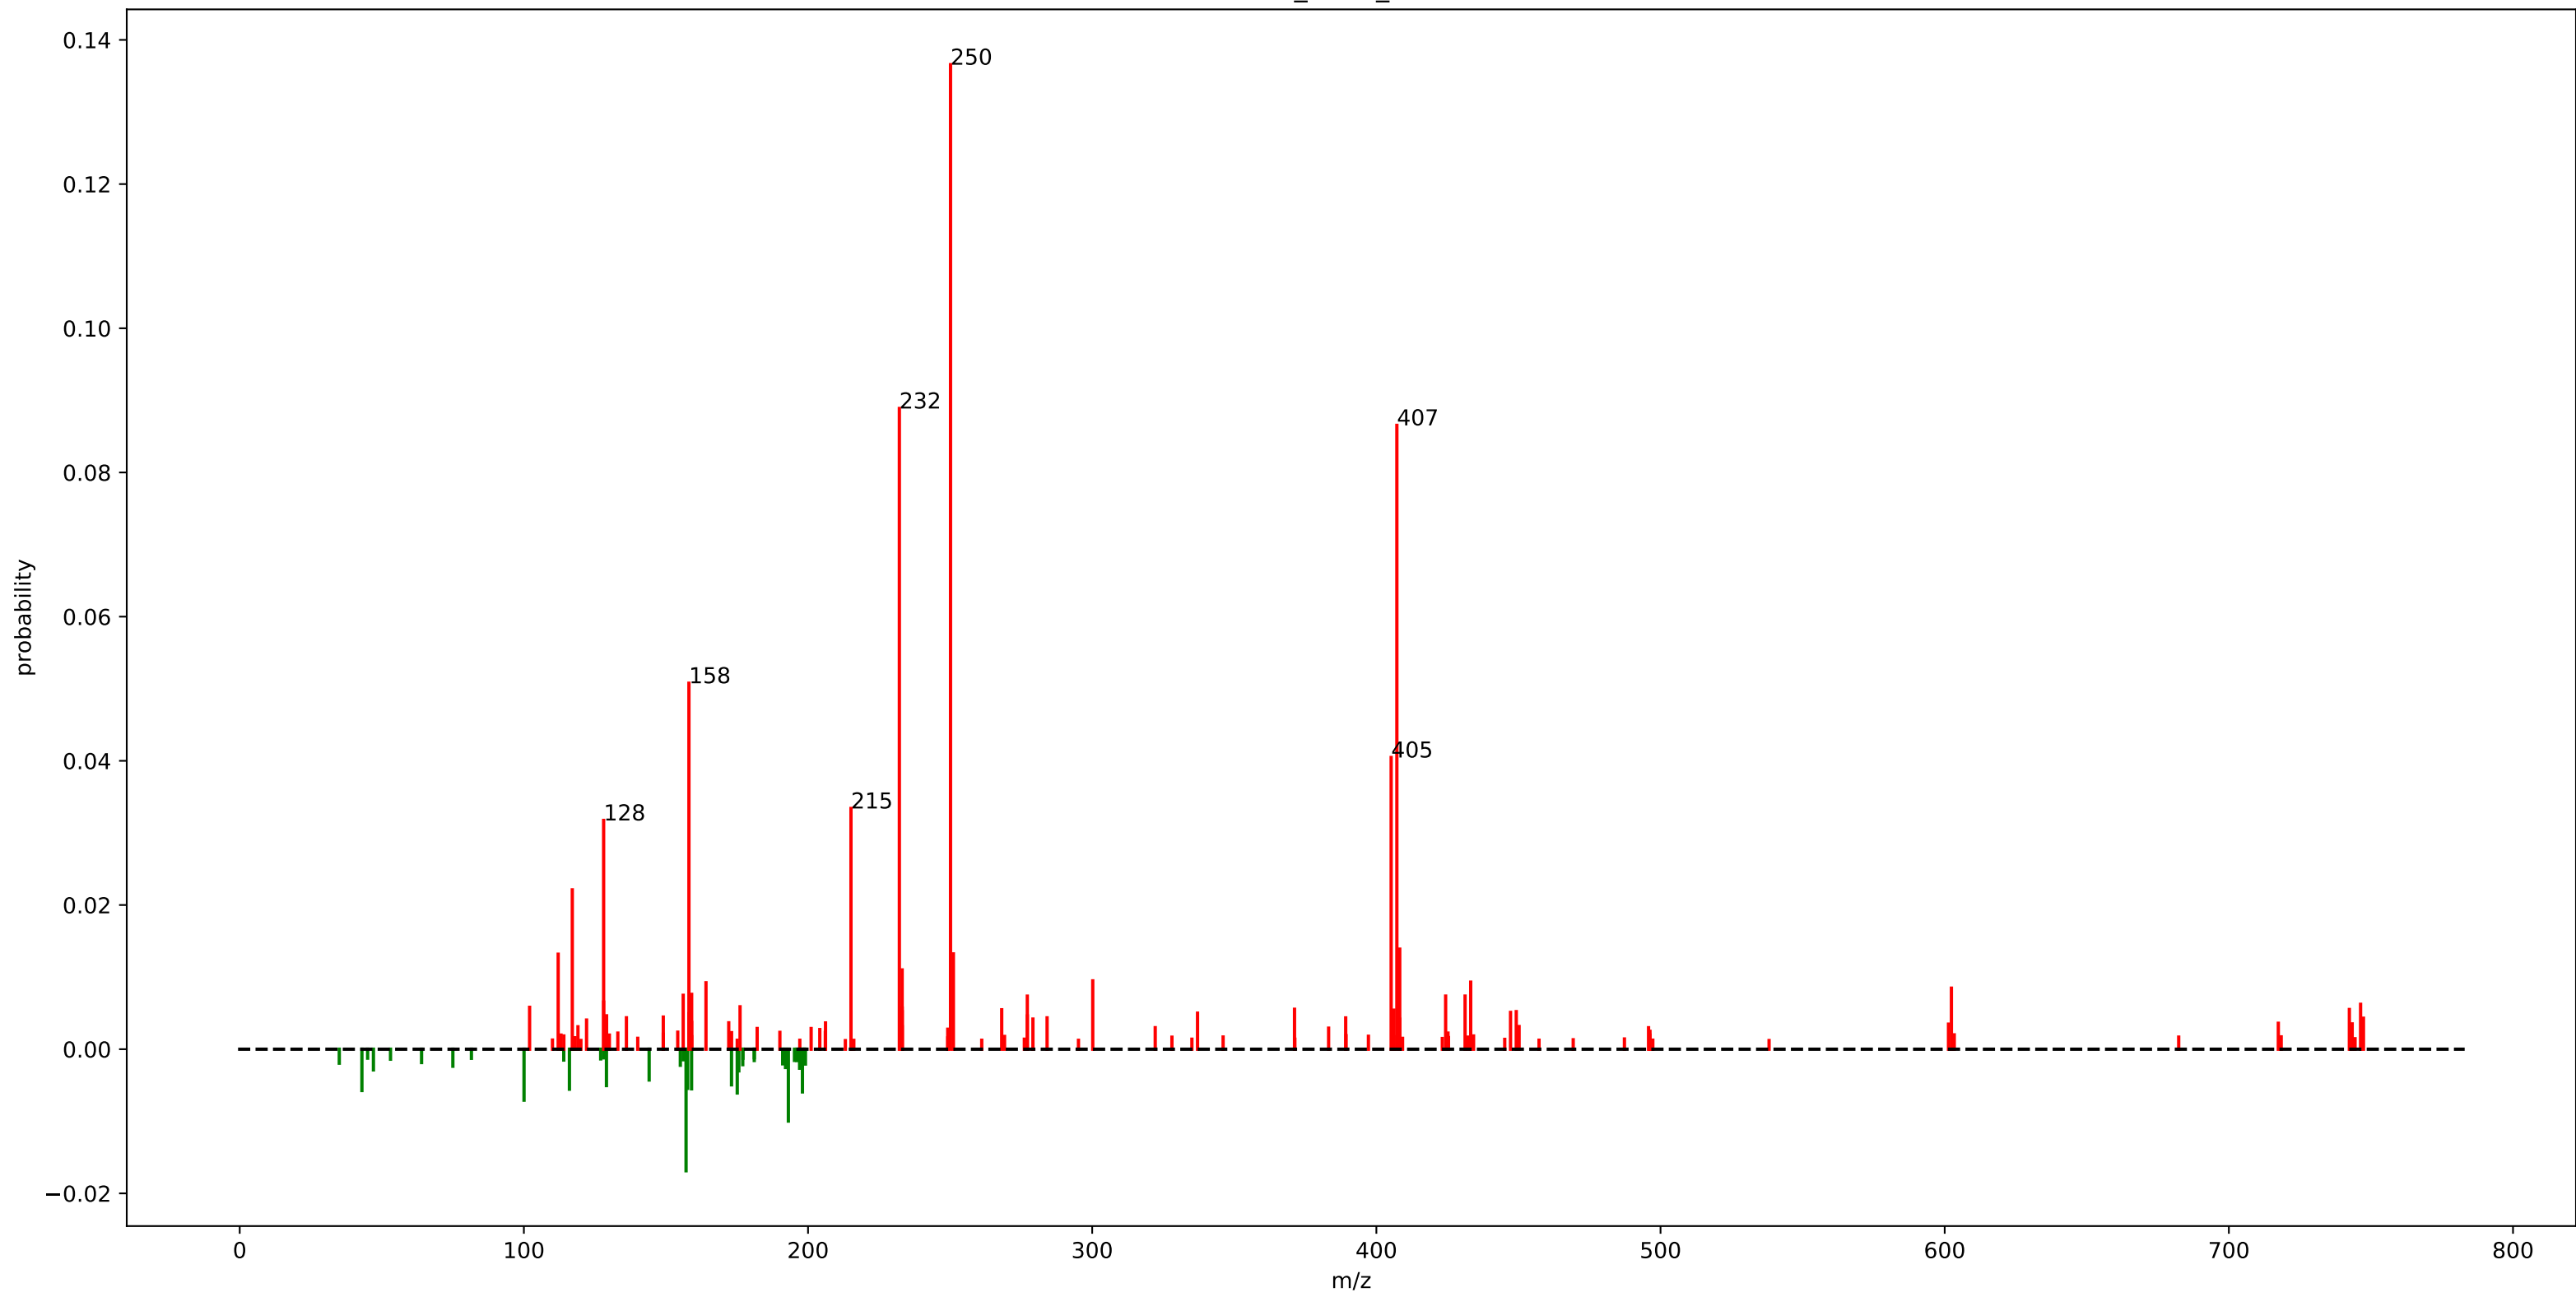

# rhabdus\_motif\_151.m2m

|                   |        |                   |        |                   |        |
|-------------------|--------|-------------------|--------|-------------------|--------|
| fragment_250.1425 | : 0.14 | fragment_431.2175 | : 0.01 | fragment_233.1325 | : 0.01 |
| fragment_232.1325 | : 0.09 | fragment_424.3775 | : 0.01 | fragment_215.1175 | : 0.01 |
| fragment_407.2175 | : 0.09 | fragment_277.1625 | : 0.01 | fragment_447.2125 | : 0.01 |
| fragment_158.0825 | : 0.05 | loss_100.0525     | : 0.01 | loss_129.0575     | : 0.01 |
| fragment_405.2025 | : 0.04 | fragment_128.0725 | : 0.01 |                   |        |
| fragment_215.1075 | : 0.03 | fragment_746.3575 | : 0.01 |                   |        |
| fragment_128.0675 | : 0.03 | loss_175.0875     | : 0.01 |                   |        |
| fragment_117.0375 | : 0.02 | loss_198.0325     | : 0.01 |                   |        |
| loss_157.0725     | : 0.02 | fragment_176.0725 | : 0.01 |                   |        |
| fragment_408.2225 | : 0.01 | fragment_102.0125 | : 0.01 |                   |        |
| fragment_251.1475 | : 0.01 | loss_43.0025      | : 0.01 |                   |        |
| fragment_112.0725 | : 0.01 | fragment_233.1275 | : 0.01 |                   |        |
| fragment_233.1225 | : 0.01 | loss_116.0275     | : 0.01 |                   |        |
| loss_193.0775     | : 0.01 | fragment_371.1975 | : 0.01 |                   |        |
| fragment_300.1925 | : 0.01 | fragment_742.4025 | : 0.01 |                   |        |
| fragment_433.1975 | : 0.01 | loss_159.0175     | : 0.01 |                   |        |
| fragment_164.0825 | : 0.01 | fragment_268.1525 | : 0.01 |                   |        |
| fragment_602.3625 | : 0.01 | loss_157.6375     | : 0.01 |                   |        |
| fragment_159.0475 | : 0.01 | fragment_406.2025 | : 0.01 |                   |        |
| fragment_156.0675 | : 0.01 | fragment_449.2275 | : 0.01 |                   |        |

rhamn\_motif\_191.m2m

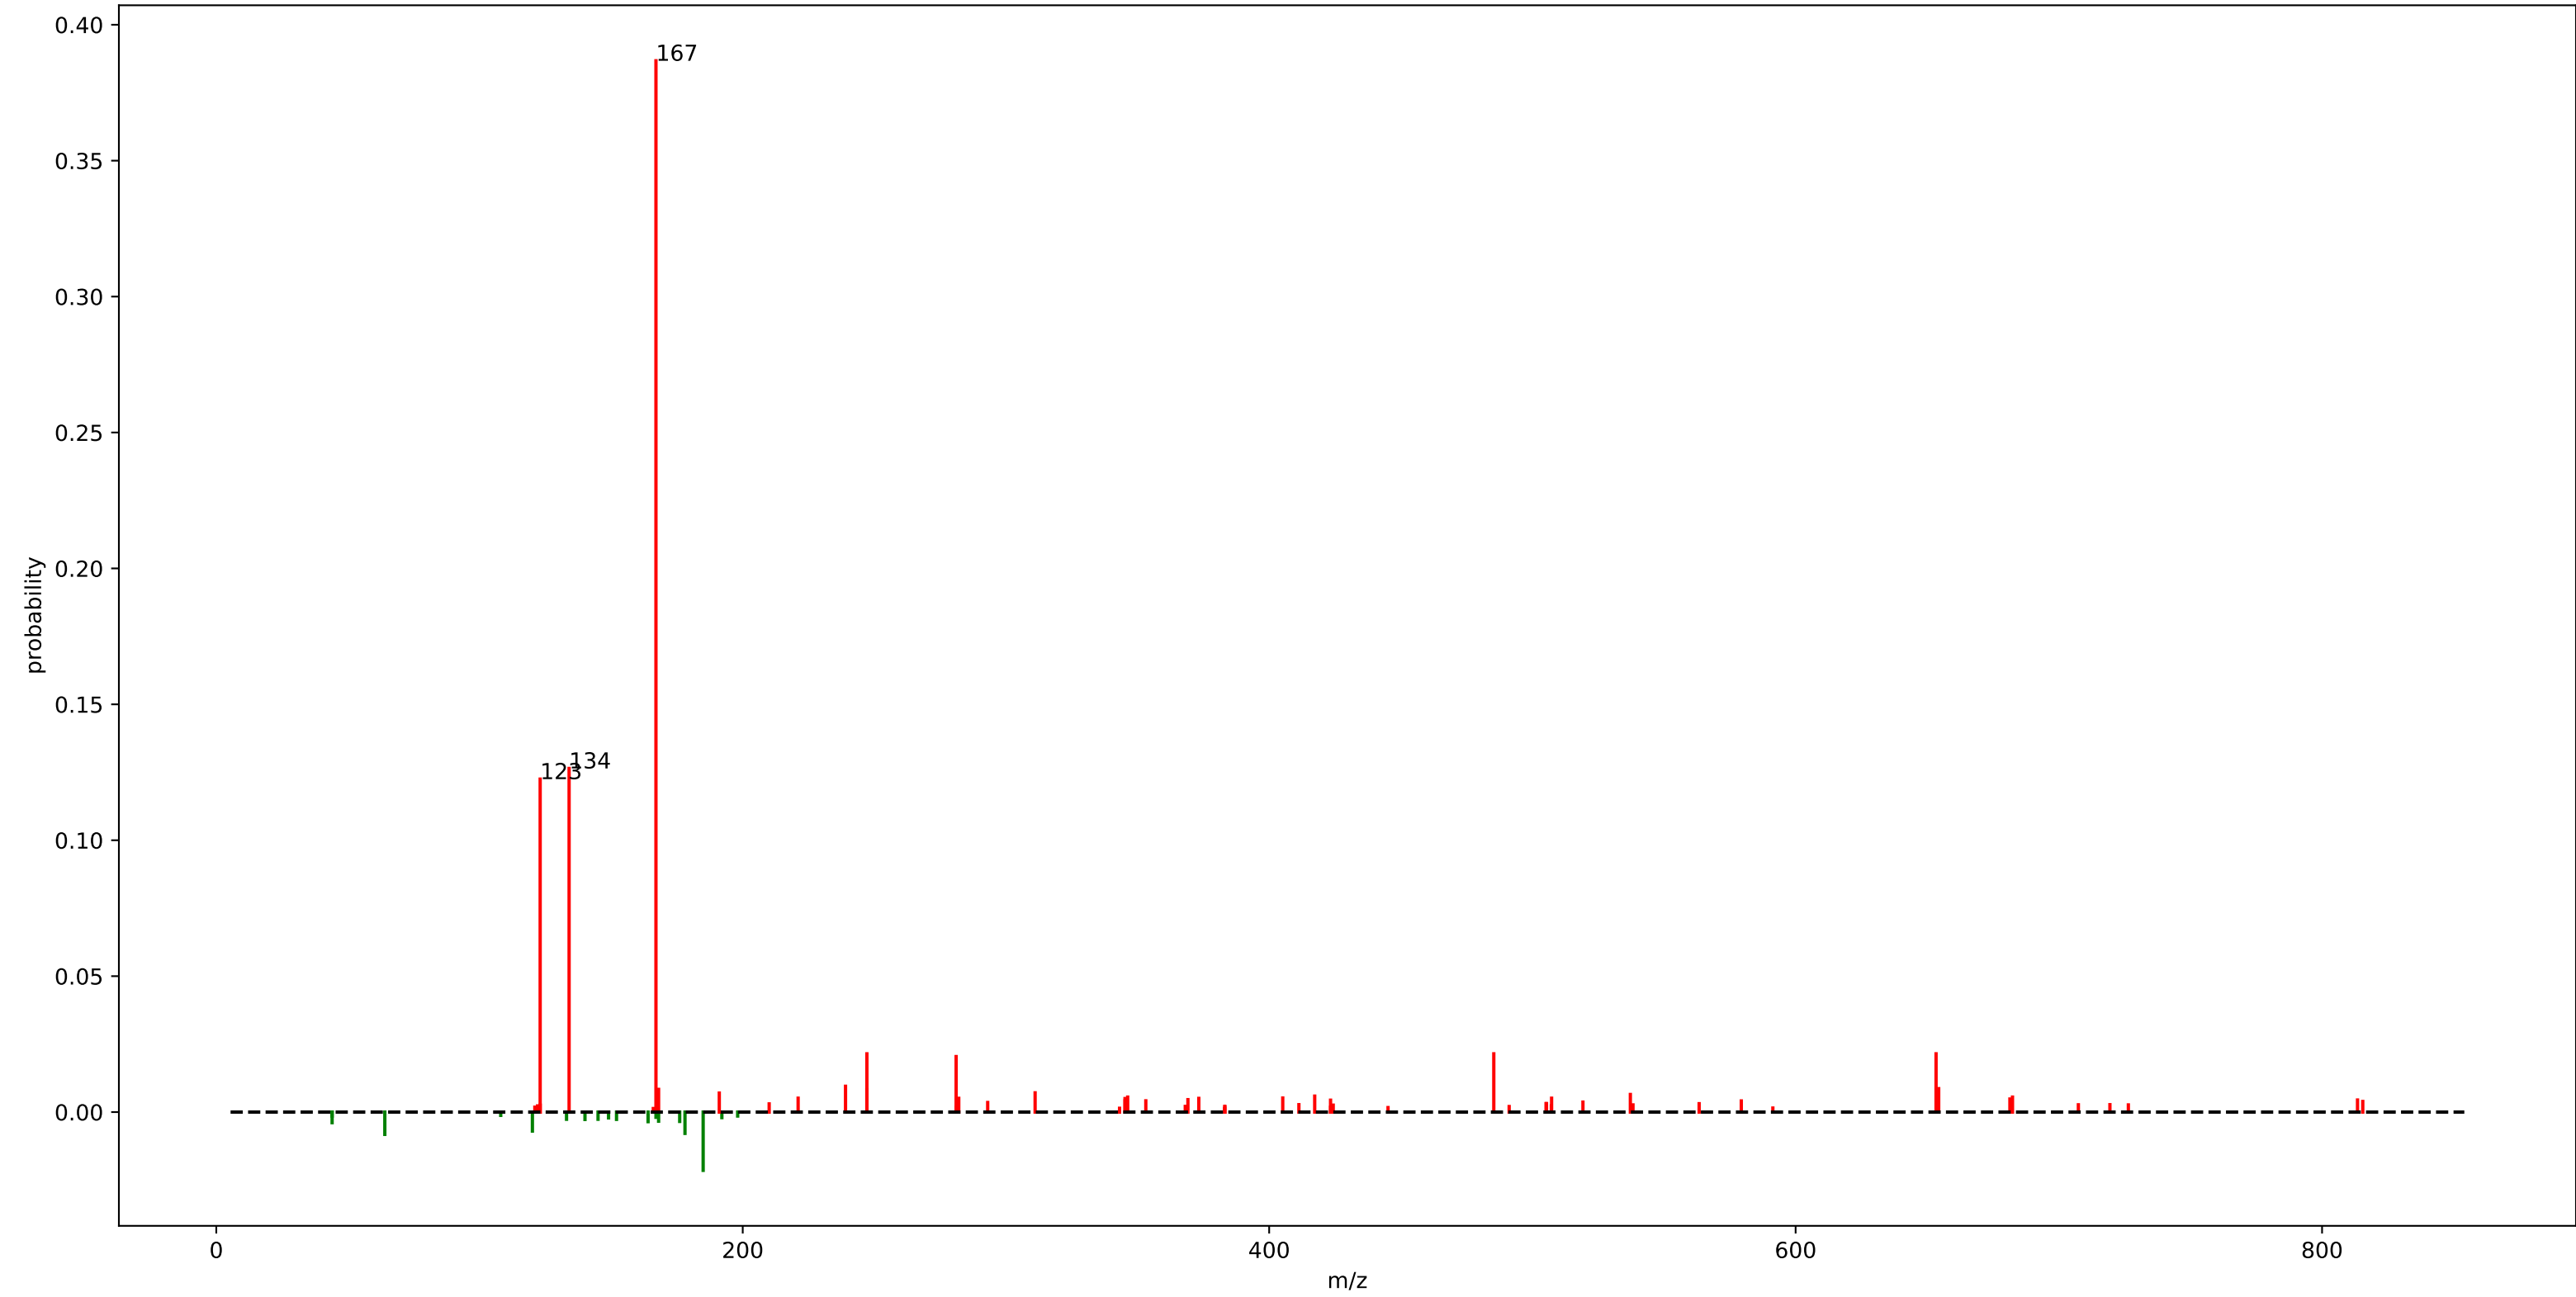

# rhamn\_motif\_191.m2m

|                   |        |                   |        |
|-------------------|--------|-------------------|--------|
| fragment_167.0325 | : 0.39 | fragment_346.2425 | : 0.01 |
| fragment_134.0375 | : 0.13 | fragment_405.1575 | : 0.01 |
| fragment_123.0425 | : 0.12 | fragment_221.0425 | : 0.01 |
| loss_184.9625     | : 0.02 | fragment_507.2925 | : 0.01 |
| fragment_485.3325 | : 0.02 | fragment_282.0725 | : 0.01 |
| fragment_653.3525 | : 0.02 | fragment_373.2675 | : 0.01 |
| fragment_247.1675 | : 0.02 |                   |        |
| fragment_281.0675 | : 0.02 |                   |        |
| fragment_239.0525 | : 0.01 |                   |        |
| fragment_654.3525 | : 0.01 |                   |        |
| fragment_168.0375 | : 0.01 |                   |        |
| loss_64.0275      | : 0.01 |                   |        |
| fragment_247.1625 | : 0.01 |                   |        |
| loss_178.0625     | : 0.01 |                   |        |
| fragment_311.0775 | : 0.01 |                   |        |
| loss_120.0925     | : 0.01 |                   |        |
| fragment_191.0925 | : 0.01 |                   |        |
| fragment_537.2125 | : 0.01 |                   |        |
| fragment_417.2975 | : 0.01 |                   |        |
| fragment_682.3925 | : 0.01 |                   |        |

StrepSalini\_motif\_213.m2m

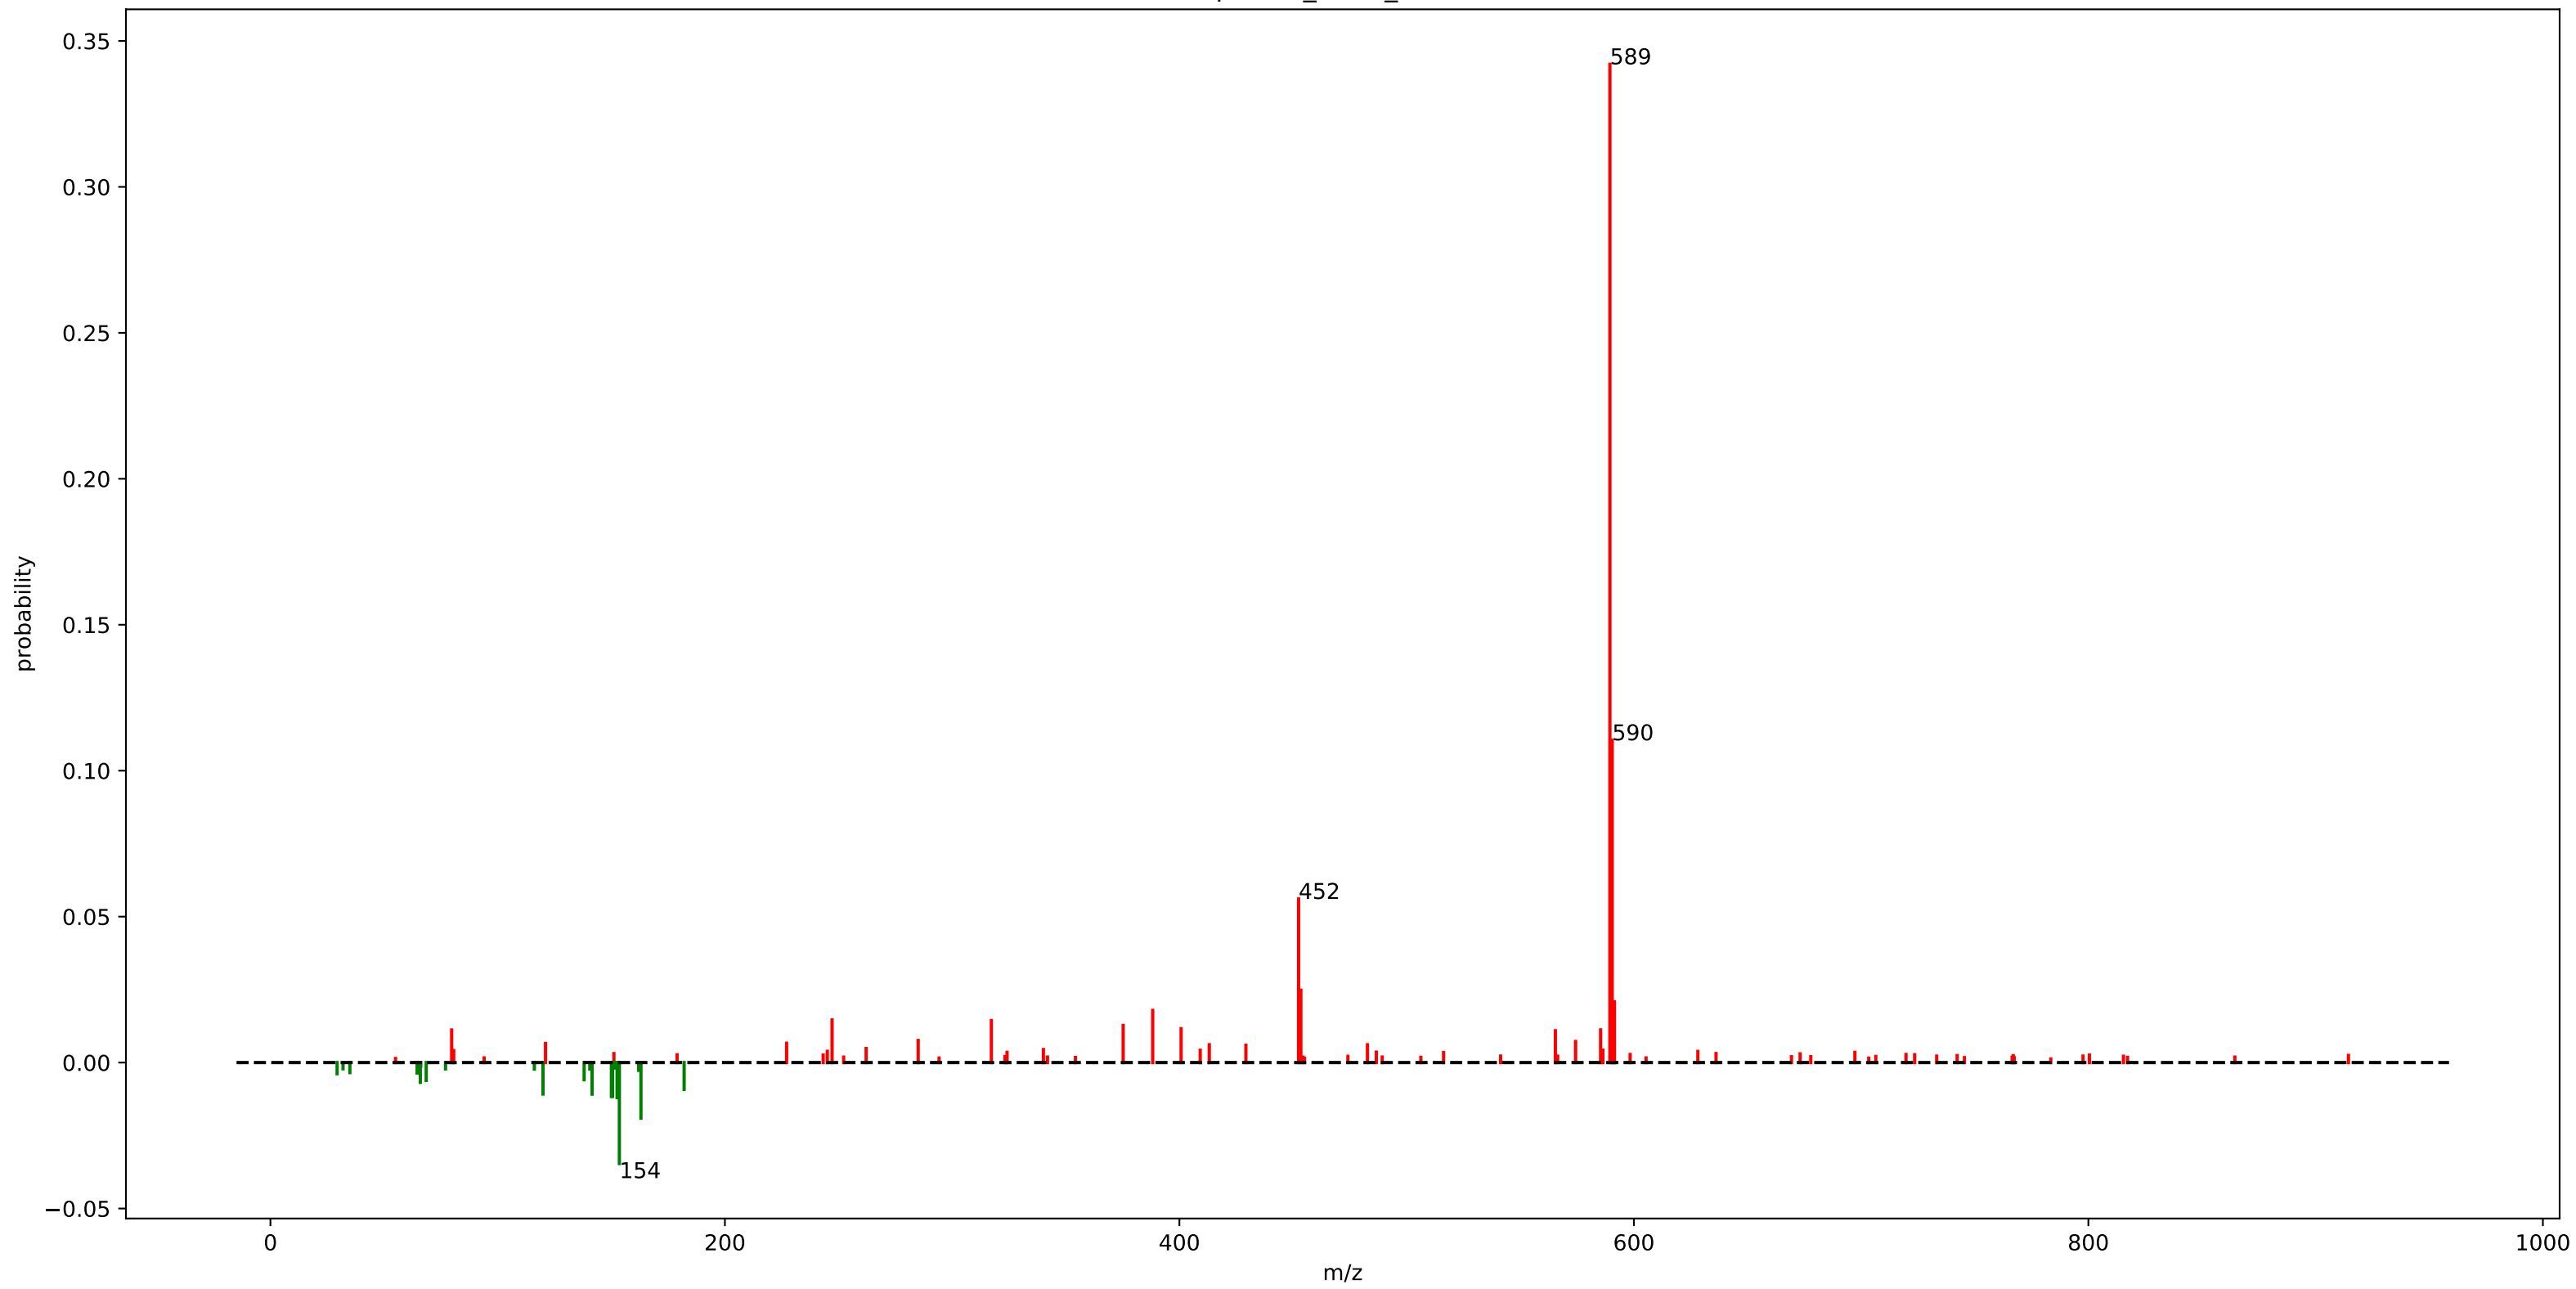

## StrepSalini\_motif\_213.m2m

|                   |        |                   |        |
|-------------------|--------|-------------------|--------|
| fragment_589.4500 | : 0.34 | loss_182.0500     | : 0.01 |
| fragment_590.4500 | : 0.11 | fragment_285.0500 | : 0.01 |
| fragment_452.4500 | : 0.06 | fragment_574.3500 | : 0.01 |
| loss_153.5500     | : 0.03 | loss_65.9500      | : 0.01 |
| fragment_453.4500 | : 0.02 | fragment_227.1500 | : 0.01 |
| fragment_591.4500 | : 0.02 | fragment_121.0525 | : 0.01 |
| loss_163.0500     | : 0.02 | fragment_413.1500 | : 0.01 |
| fragment_388.2500 | : 0.02 | loss_68.5500      | : 0.01 |
| fragment_247.1525 | : 0.01 | fragment_482.7500 | : 0.01 |
| fragment_317.2500 | : 0.01 | fragment_429.2500 | : 0.01 |
| fragment_375.2500 | : 0.01 | loss_138.0525     | : 0.01 |
| loss_152.5500     | : 0.01 |                   |        |
| fragment_400.7500 | : 0.01 |                   |        |
| loss_150.5500     | : 0.01 |                   |        |
| loss_150.0525     | : 0.01 |                   |        |
| fragment_585.3500 | : 0.01 |                   |        |
| fragment_79.7500  | : 0.01 |                   |        |
| fragment_565.4500 | : 0.01 |                   |        |
| loss_141.5500     | : 0.01 |                   |        |
| loss_119.9500     | : 0.01 |                   |        |



euphorbia\_motif\_75.m2m

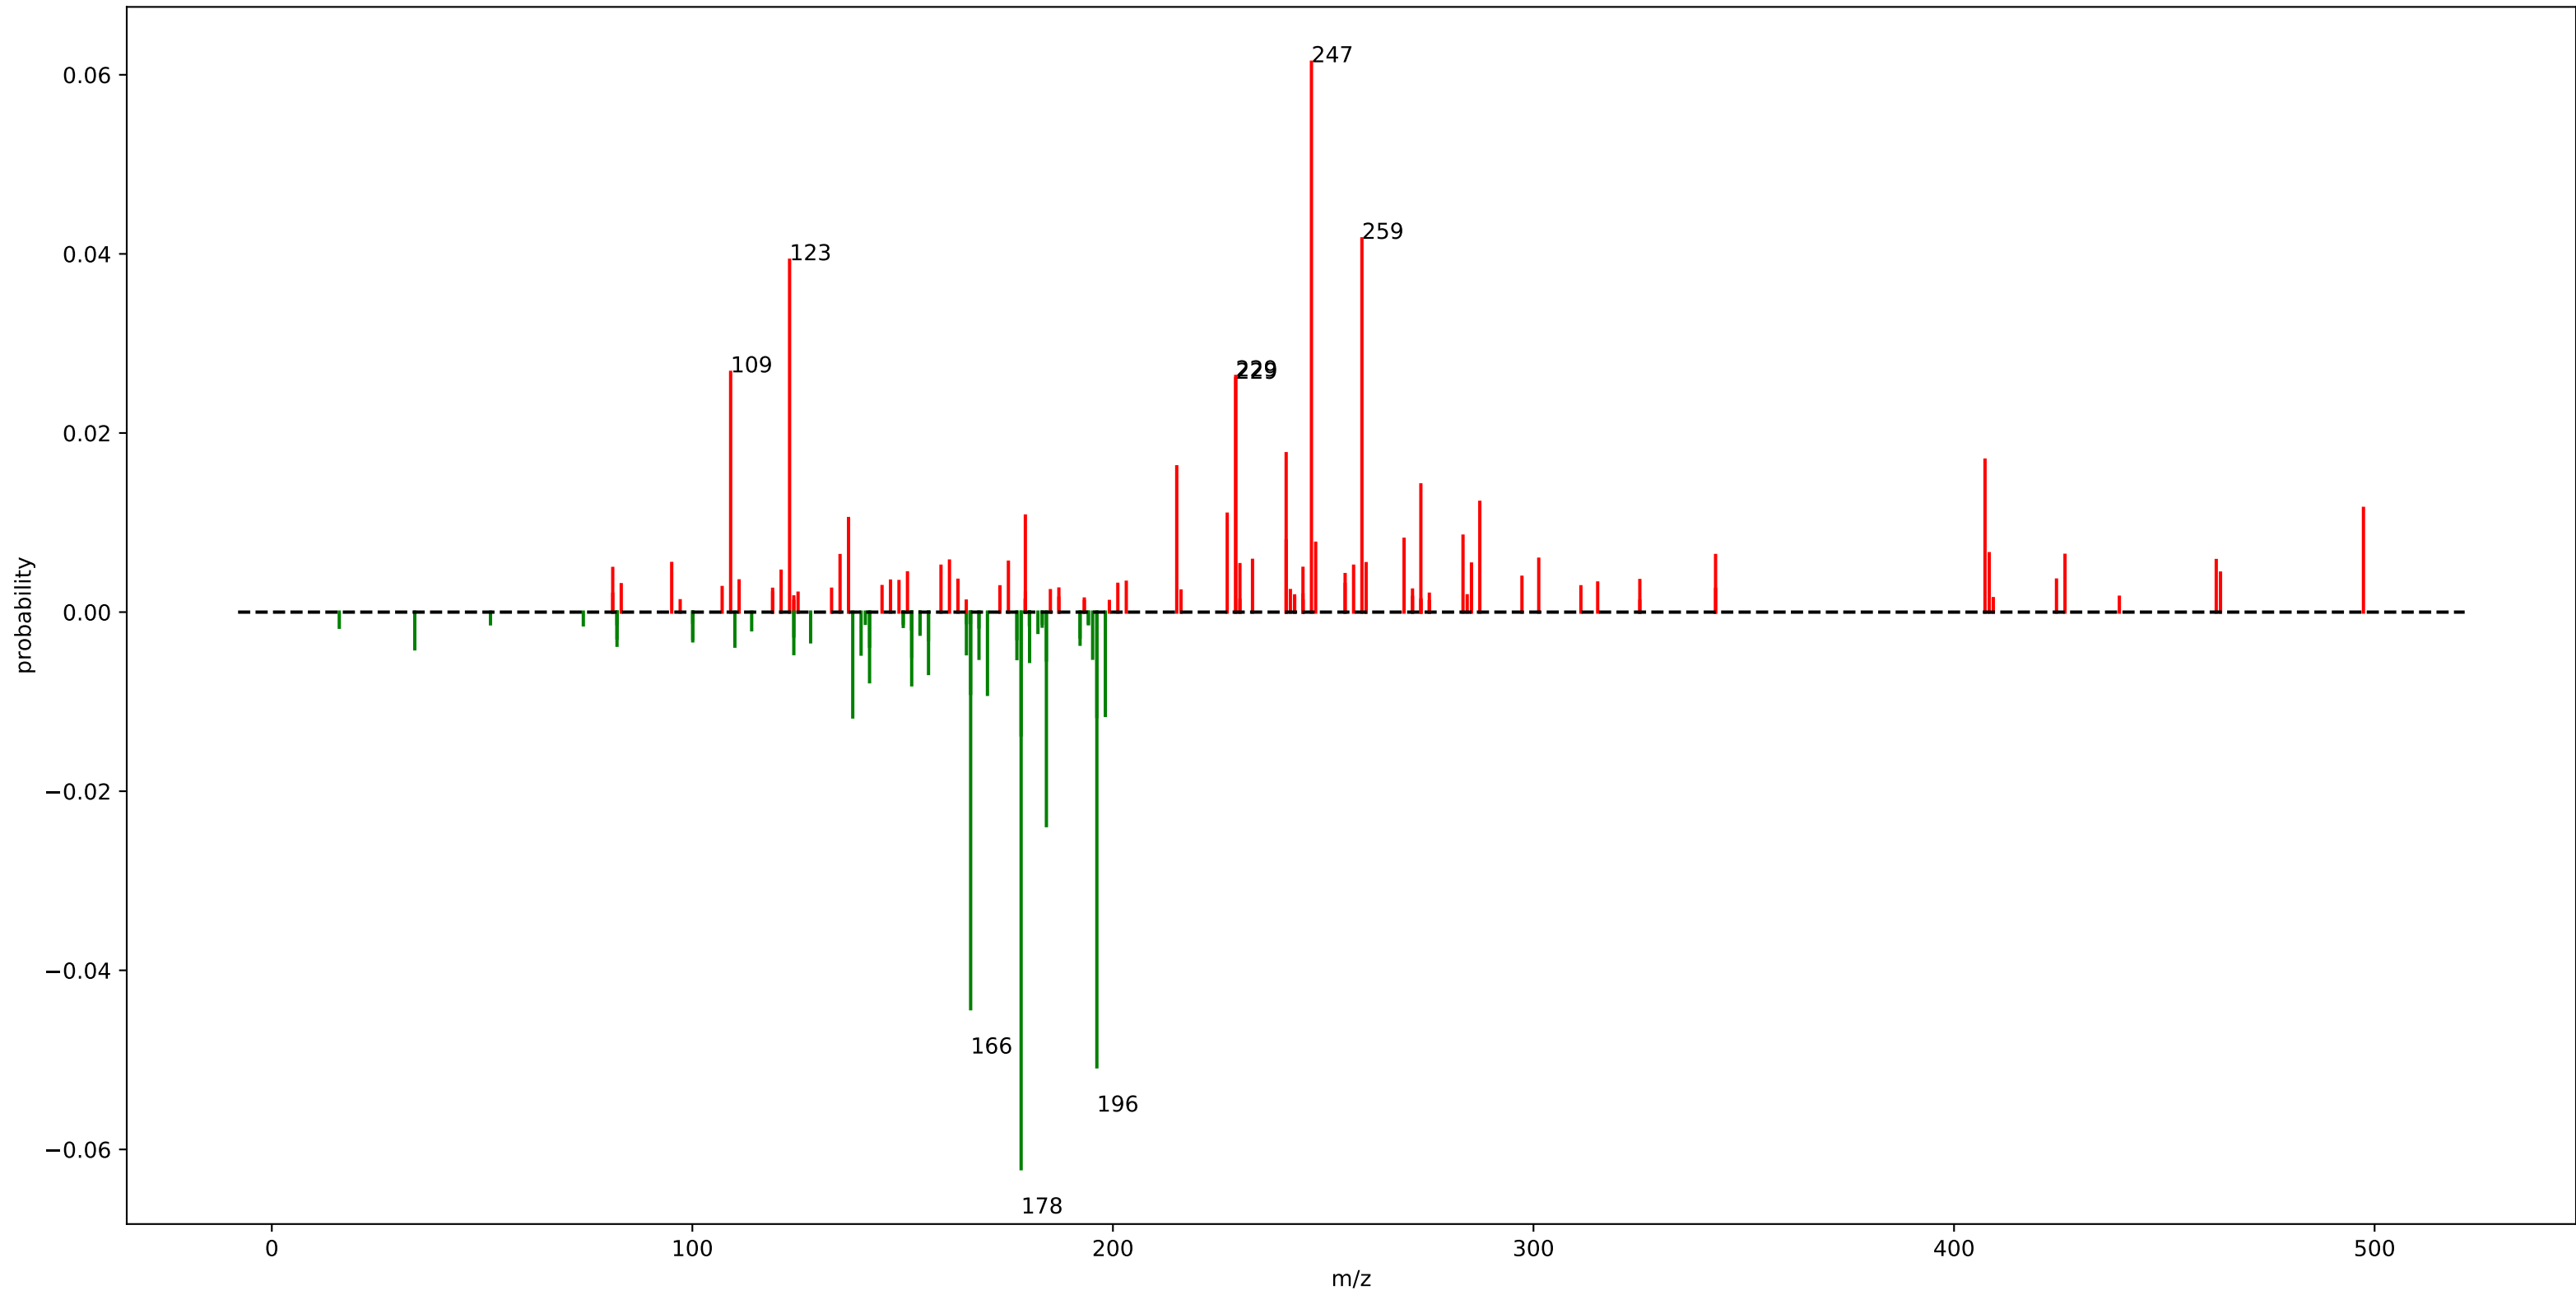

# euphorbia\_motif\_75.m2m

|                   |        |                   |        |                   |        |
|-------------------|--------|-------------------|--------|-------------------|--------|
| loss_178.1725     | : 0.06 | fragment_227.1775 | : 0.01 | fragment_175.1475 | : 0.01 |
| fragment_247.2075 | : 0.06 | fragment_179.1775 | : 0.01 | loss_180.1875     | : 0.01 |
| loss_196.1825     | : 0.05 | fragment_137.1325 | : 0.01 | fragment_95.0875  | : 0.01 |
| loss_166.1725     | : 0.04 | loss_170.1675     | : 0.01 | fragment_260.2075 | : 0.01 |
| fragment_259.2075 | : 0.04 | loss_166.1675     | : 0.01 | fragment_285.2575 | : 0.01 |
| fragment_123.1175 | : 0.04 | fragment_283.2425 | : 0.01 | loss_184.1775     | : 0.01 |
| fragment_109.1025 | : 0.03 | fragment_269.2275 | : 0.01 | fragment_230.1975 | : 0.01 |
| fragment_229.1925 | : 0.03 | loss_152.1525     | : 0.01 | loss_177.1675     | : 0.01 |
| fragment_229.1975 | : 0.03 | fragment_241.1975 | : 0.01 | loss_168.1525     | : 0.01 |
| loss_184.1825     | : 0.02 | loss_142.1325     | : 0.01 | loss_195.1775     | : 0.01 |
| fragment_241.1925 | : 0.02 | fragment_248.2075 | : 0.01 | fragment_257.2275 | : 0.01 |
| fragment_407.3675 | : 0.02 | loss_156.1525     | : 0.01 | fragment_159.1175 | : 0.01 |
| fragment_215.1775 | : 0.02 | fragment_408.3725 | : 0.01 |                   |        |
| fragment_273.2225 | : 0.01 | fragment_426.3825 | : 0.01 |                   |        |
| loss_178.1675     | : 0.01 | fragment_343.2975 | : 0.01 |                   |        |
| fragment_287.2375 | : 0.01 | fragment_135.1175 | : 0.01 |                   |        |
| loss_138.1375     | : 0.01 | fragment_301.2525 | : 0.01 |                   |        |
| loss_196.1775     | : 0.01 | fragment_233.1925 | : 0.01 |                   |        |
| fragment_497.3525 | : 0.01 | fragment_462.3475 | : 0.01 |                   |        |
| loss_198.1975     | : 0.01 | fragment_161.1325 | : 0.01 |                   |        |

gnps\_motif\_61.m2m

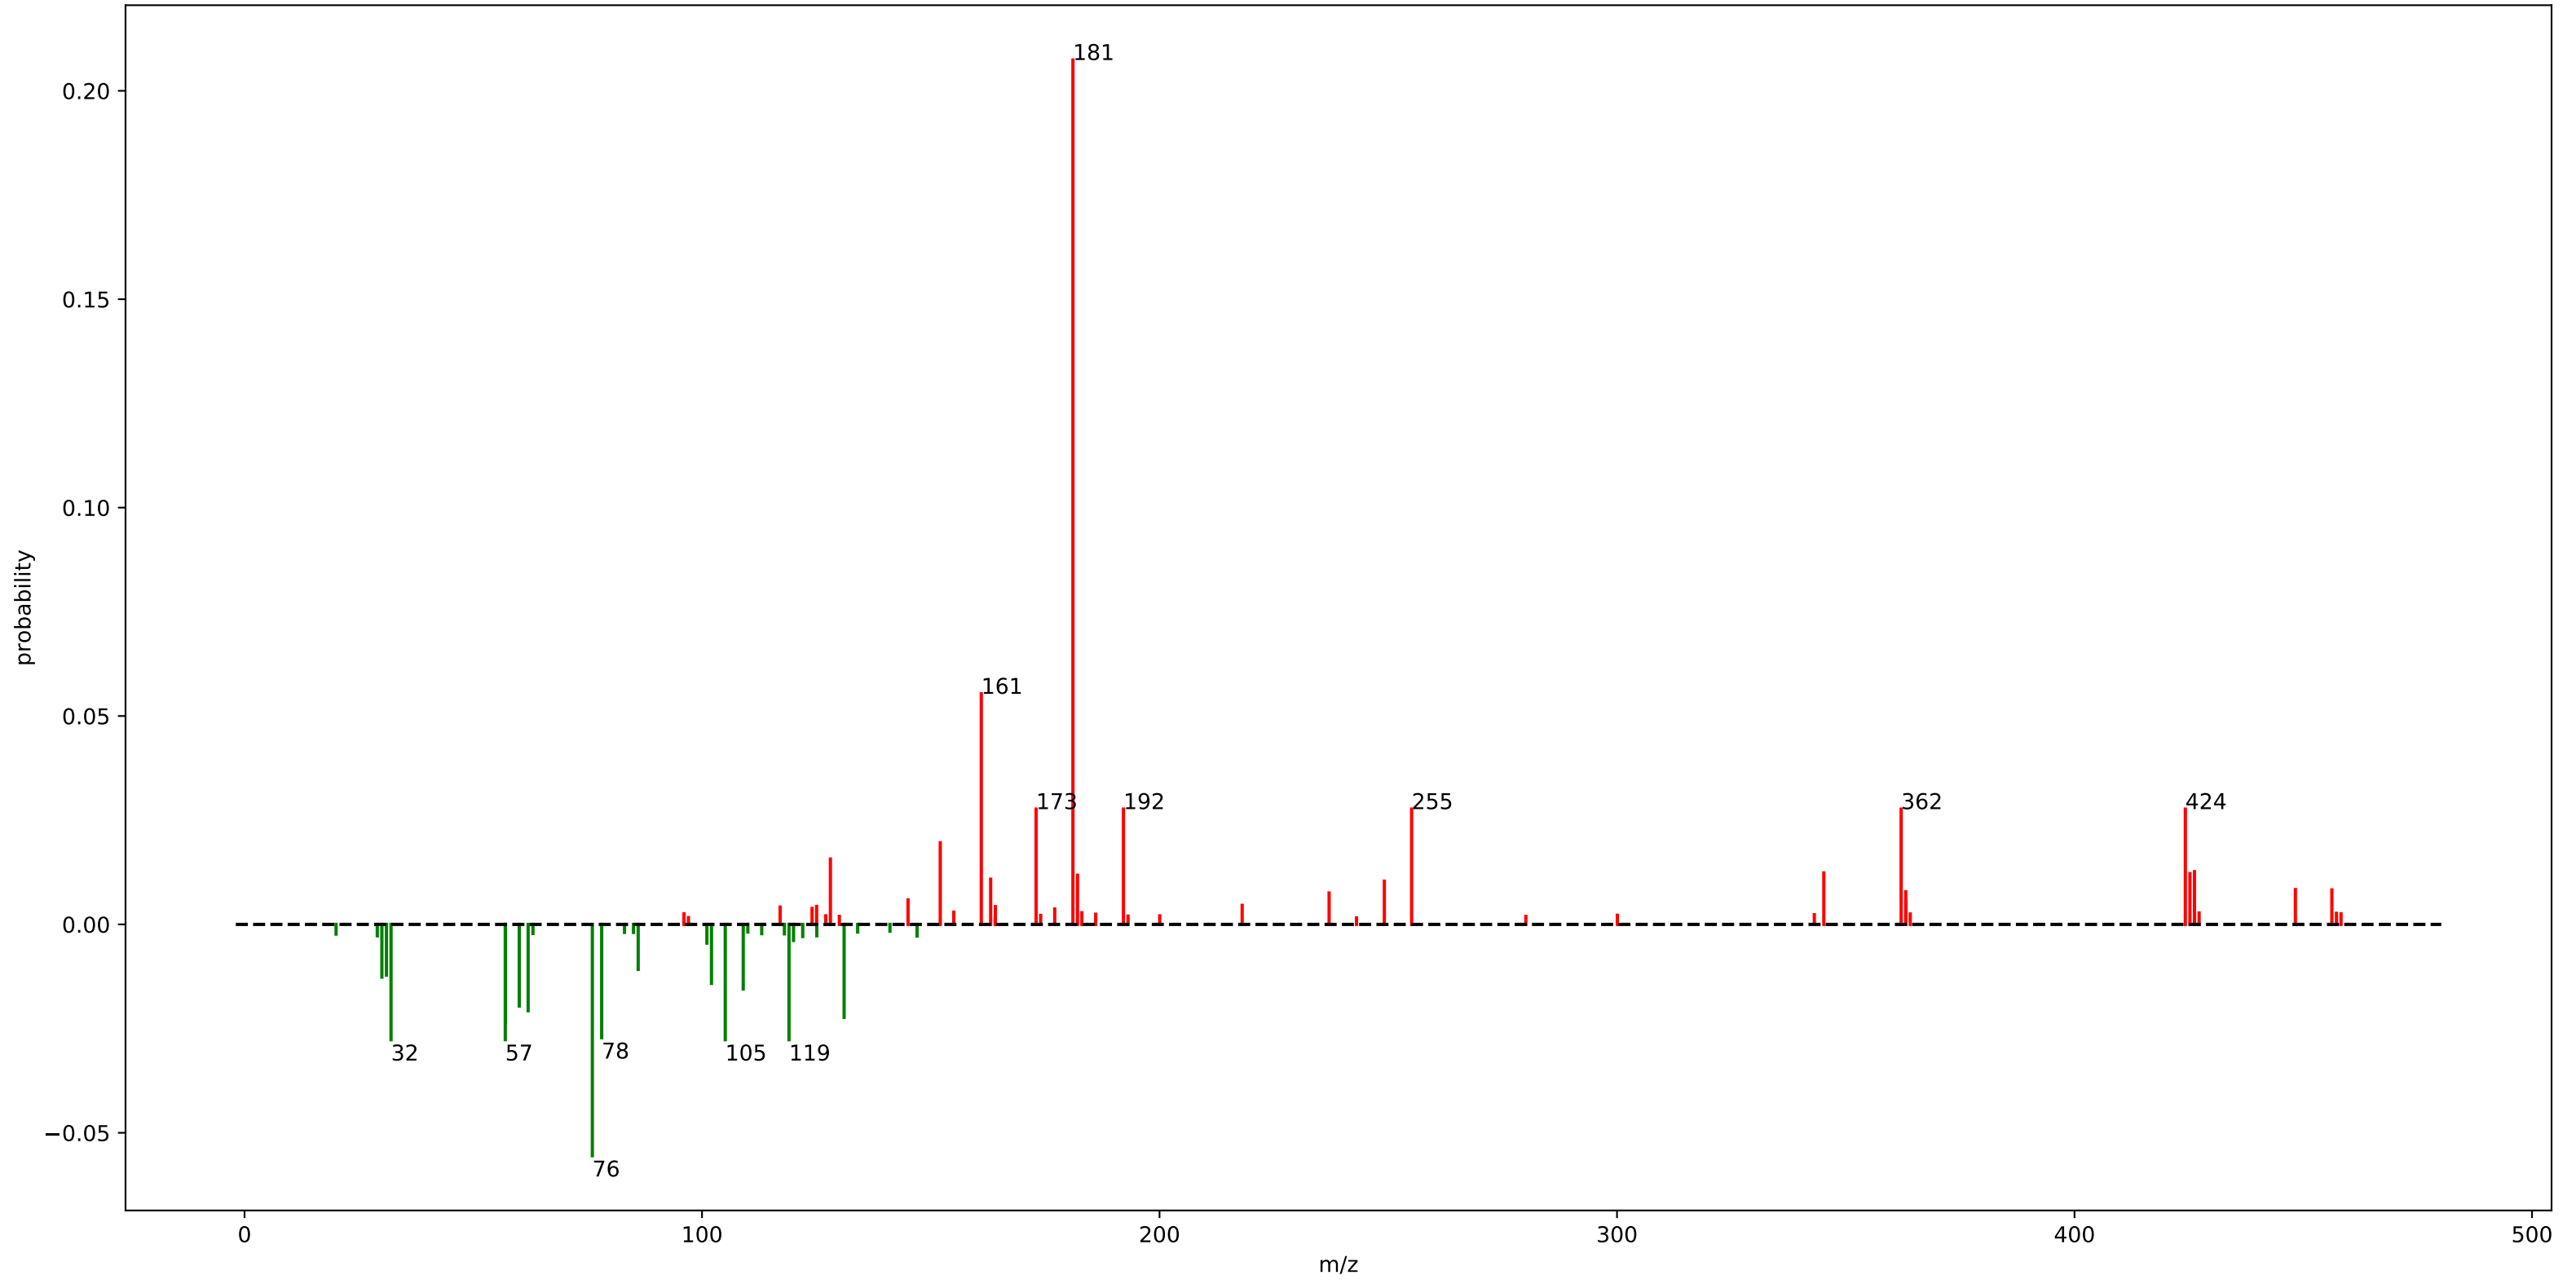

# gnps\_motif\_61.m2m

|                   |        |                   |        |
|-------------------|--------|-------------------|--------|
| fragment_181.0725 | : 0.21 | loss_102.0675     | : 0.01 |
| loss_76.0275      | : 0.06 | fragment_426.2225 | : 0.01 |
| fragment_161.0425 | : 0.06 | loss_30.0275      | : 0.01 |
| loss_119.0125     | : 0.03 | fragment_345.2025 | : 0.01 |
| loss_32.0225      | : 0.03 | fragment_425.2275 | : 0.01 |
| fragment_424.2225 | : 0.03 | loss_31.0225      | : 0.01 |
| fragment_362.1075 | : 0.03 | fragment_182.0725 | : 0.01 |
| loss_105.0775     | : 0.03 | fragment_163.0875 | : 0.01 |
| fragment_173.0225 | : 0.03 | loss_86.0475      | : 0.01 |
| fragment_255.1075 | : 0.03 | fragment_249.1375 | : 0.01 |
| fragment_192.1125 | : 0.03 | fragment_448.2775 | : 0.01 |
| loss_56.9975      | : 0.03 | fragment_456.2525 | : 0.01 |
| loss_78.0675      | : 0.03 | fragment_363.1075 | : 0.01 |
| loss_57.0225      | : 0.02 | fragment_237.0675 | : 0.01 |
| loss_131.0575     | : 0.02 | fragment_145.0275 | : 0.01 |
| loss_61.9925      | : 0.02 | fragment_363.1325 | : 0.01 |
| loss_60.0525      | : 0.02 |                   |        |
| fragment_152.0725 | : 0.02 |                   |        |
| fragment_128.0625 | : 0.02 |                   |        |
| loss_109.0075     | : 0.02 |                   |        |

urine\_mass2motif\_232.m2m

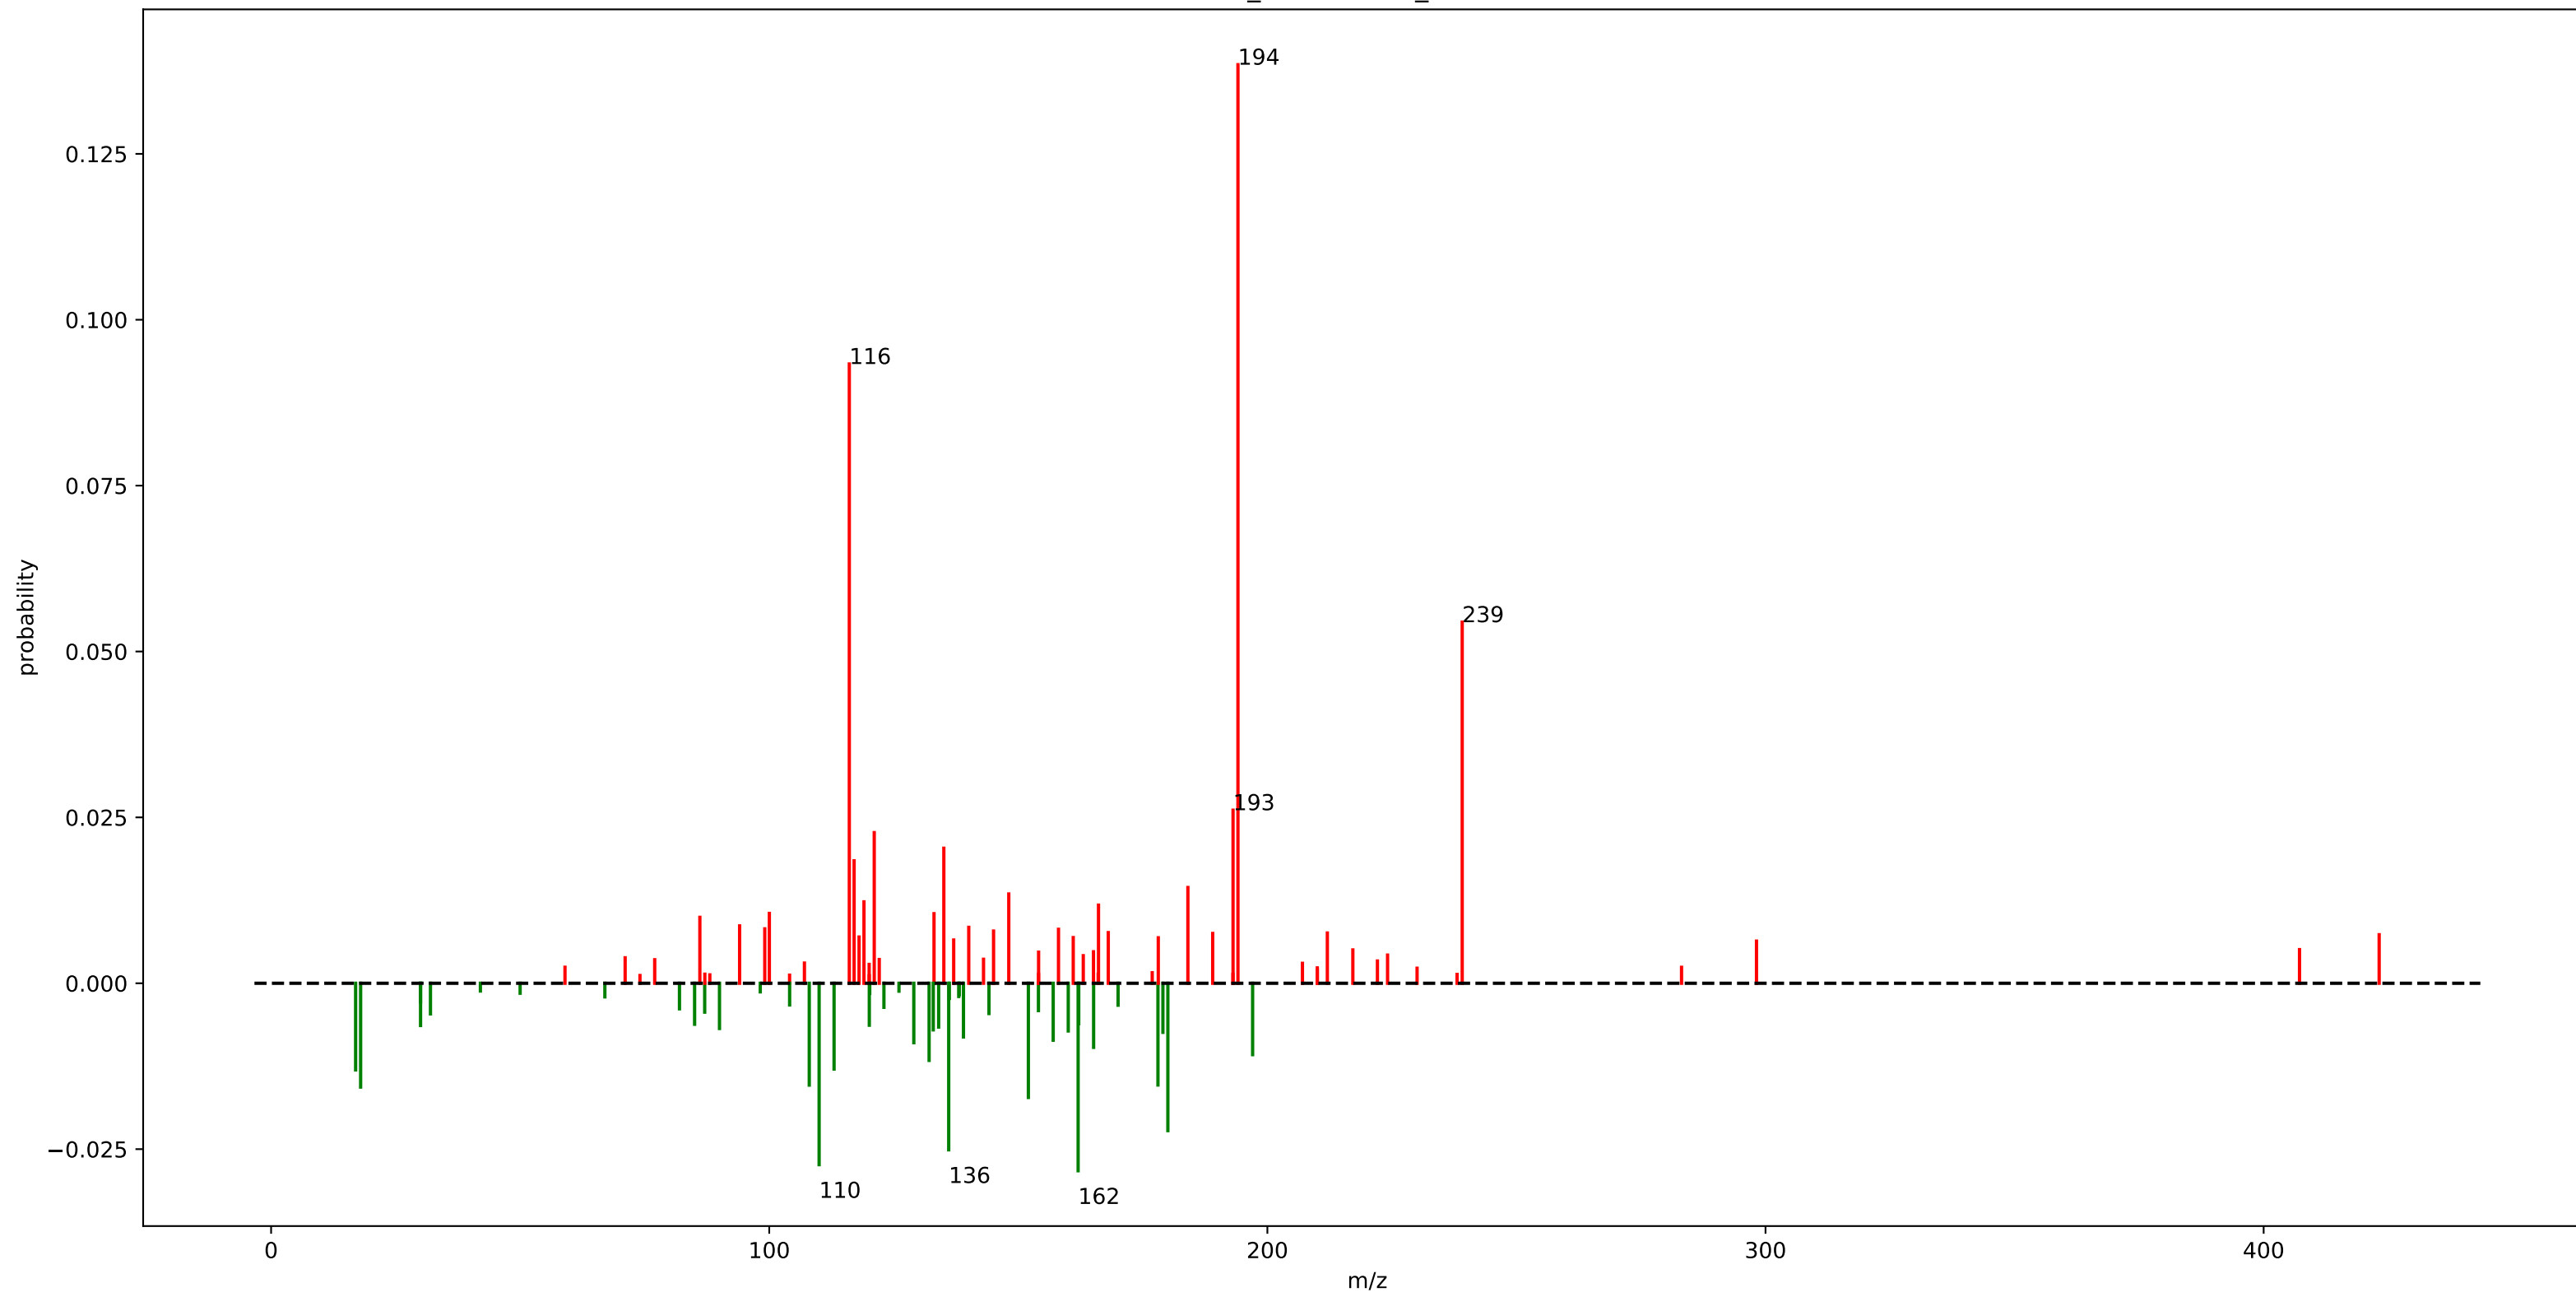

# urine\_mass2motif\_232.m2m

|                   |        |                   |        |                   |        |
|-------------------|--------|-------------------|--------|-------------------|--------|
| fragment_194.0925 | : 0.14 | fragment_166.0975 | : 0.01 | loss_160.0275     | : 0.01 |
| fragment_116.0725 | : 0.09 | loss_132.0925     | : 0.01 | loss_132.9275     | : 0.01 |
| fragment_239.1125 | : 0.05 | loss_197.0375     | : 0.01 | fragment_118.0325 | : 0.01 |
| loss_162.0075     | : 0.03 | fragment_100.0225 | : 0.01 | fragment_161.0275 | : 0.01 |
| loss_110.0125     | : 0.03 | fragment_133.0775 | : 0.01 | fragment_178.0975 | : 0.01 |
| fragment_193.1075 | : 0.03 | fragment_86.0725  | : 0.01 | loss_90.0125      | : 0.01 |
| loss_136.0275     | : 0.03 | loss_165.1175     | : 0.01 | loss_134.0075     | : 0.01 |
| fragment_121.0775 | : 0.02 | loss_129.0225     | : 0.01 | fragment_137.0275 | : 0.01 |
| loss_180.0225     | : 0.02 | fragment_94.0525  | : 0.01 | loss_30.0025      | : 0.01 |
| fragment_135.0475 | : 0.02 | loss_157.0025     | : 0.01 | fragment_298.1875 | : 0.01 |
| fragment_117.0375 | : 0.02 | fragment_140.0525 | : 0.01 | loss_120.0875     | : 0.01 |
| loss_152.0175     | : 0.02 | fragment_99.1025  | : 0.01 | loss_85.0175      | : 0.01 |
| loss_17.9725      | : 0.02 | fragment_158.0675 | : 0.01 | loss_162.1275     | : 0.01 |
| loss_108.0325     | : 0.02 | loss_138.9925     | : 0.01 | fragment_407.1975 | : 0.01 |
| loss_178.0325     | : 0.02 | fragment_145.0325 | : 0.01 | fragment_217.1575 | : 0.01 |
| fragment_184.0425 | : 0.01 | fragment_168.0625 | : 0.01 |                   |        |
| fragment_148.0875 | : 0.01 | fragment_212.0375 | : 0.01 |                   |        |
| loss_16.9675      | : 0.01 | fragment_189.0225 | : 0.01 |                   |        |
| loss_113.0125     | : 0.01 | loss_179.0275     | : 0.01 |                   |        |
| fragment_119.0175 | : 0.01 | fragment_423.1875 | : 0.01 |                   |        |

euphorbia\_motif\_92.m2m

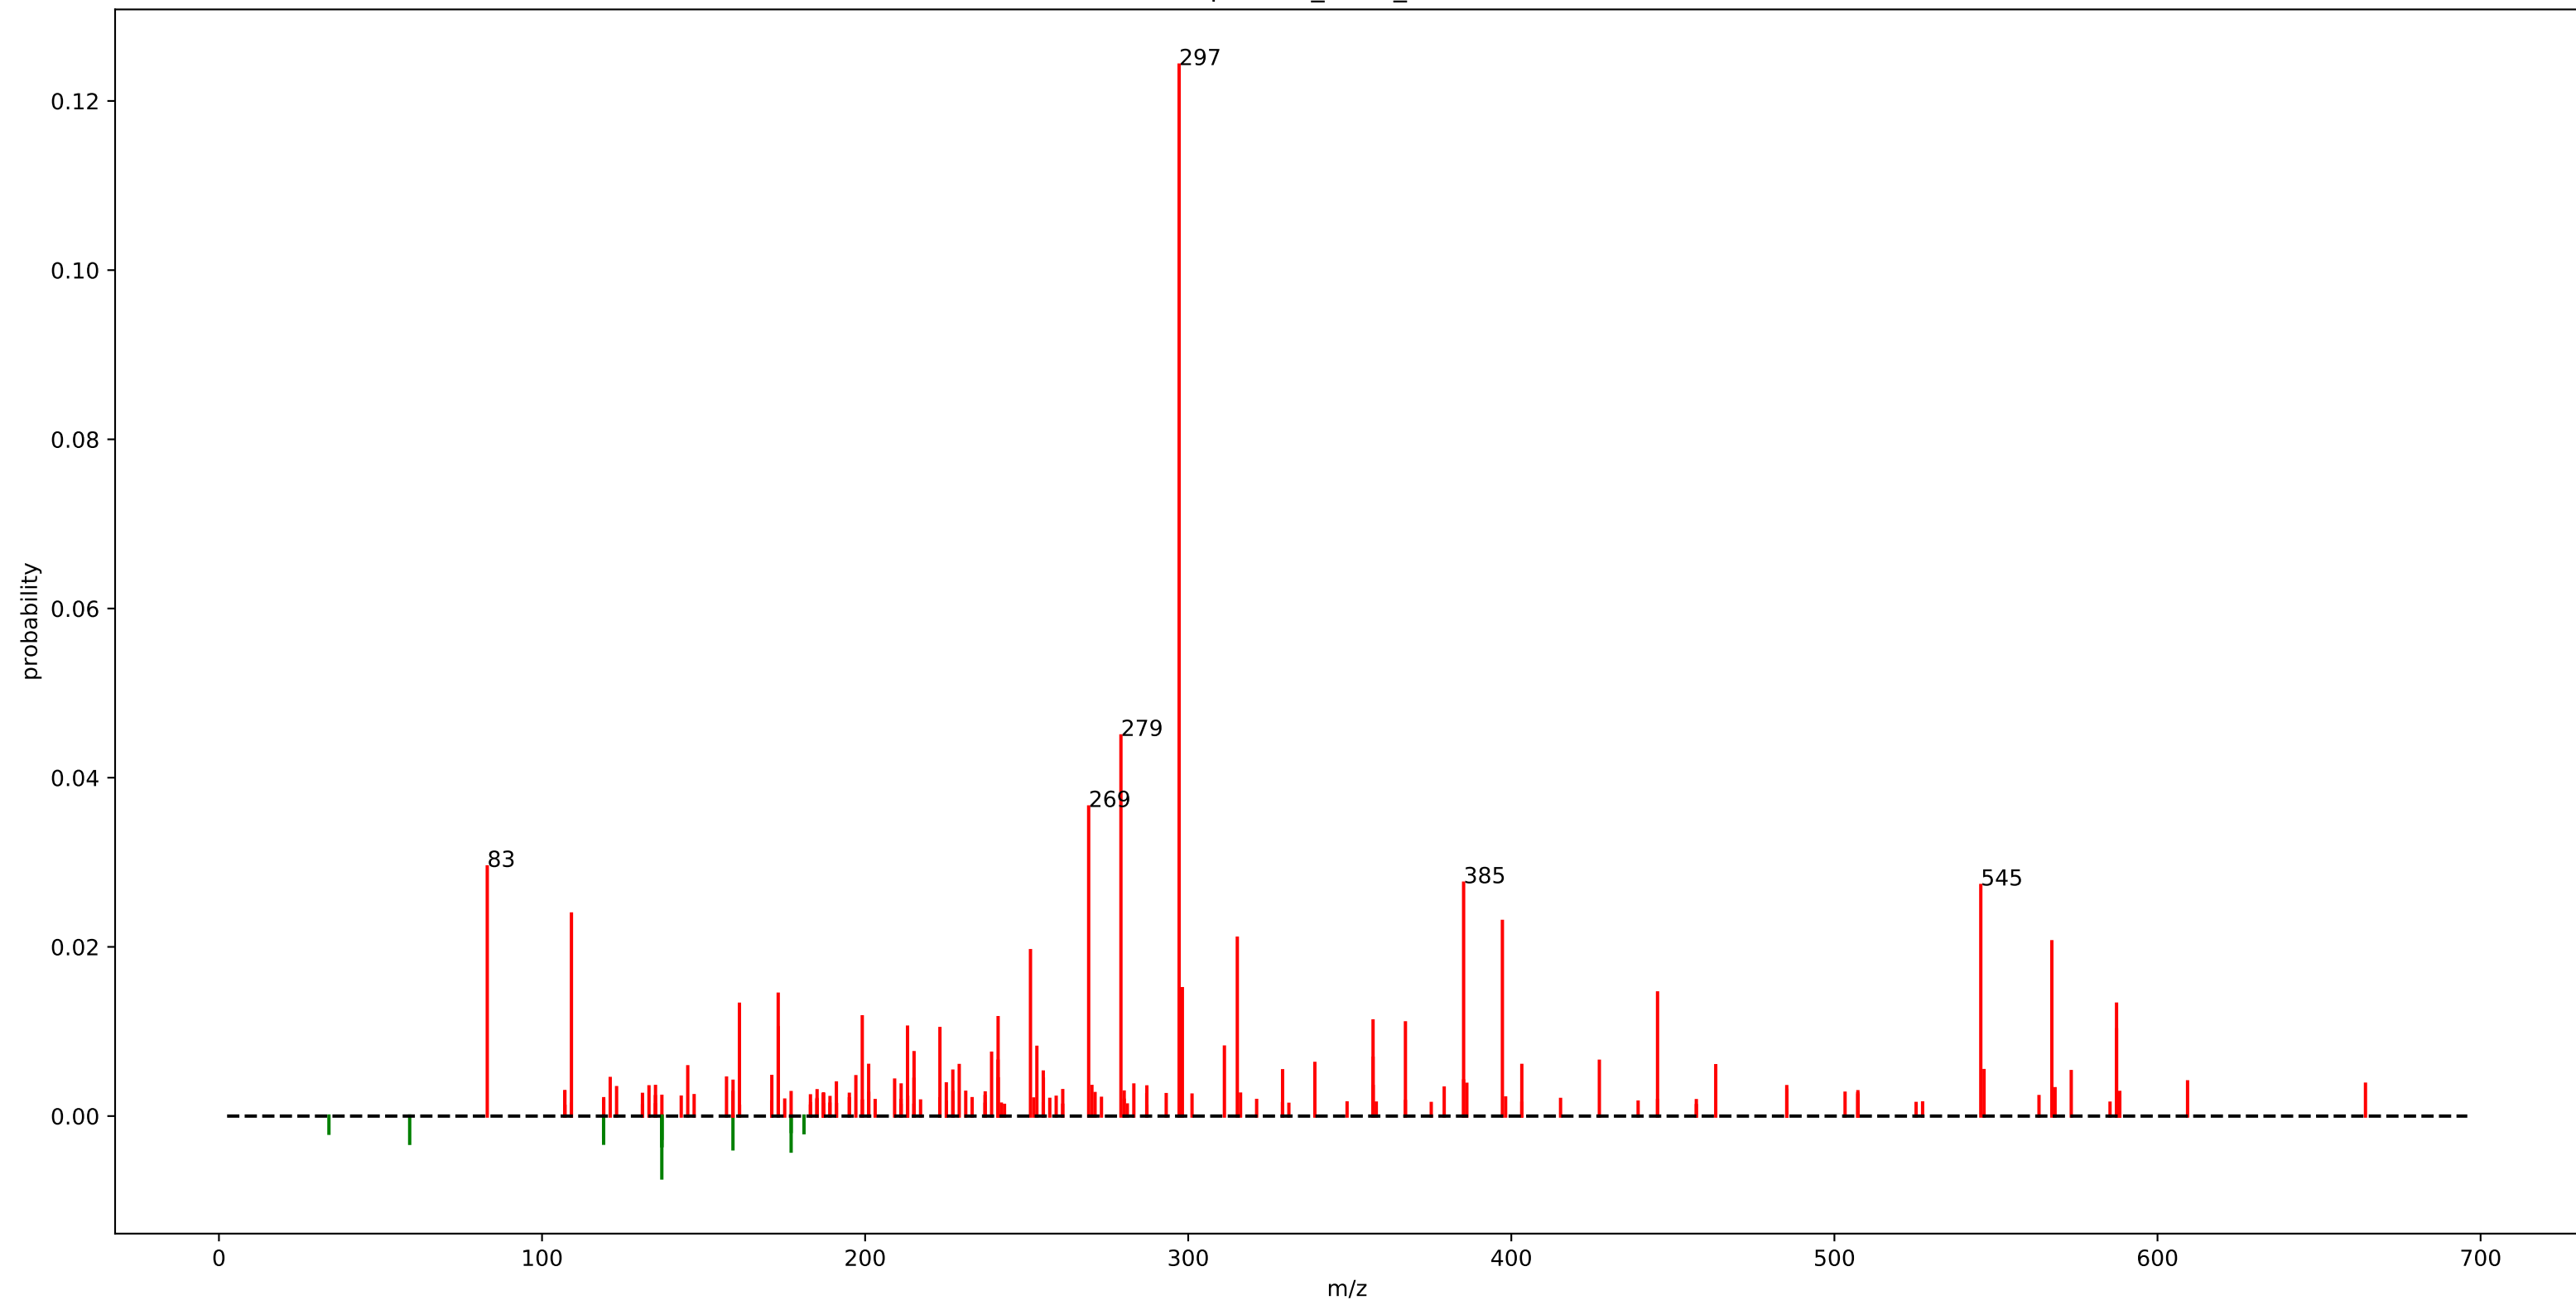

## euphorbia\_motif\_92.m2m

|                   |        |                   |        |                   |        |
|-------------------|--------|-------------------|--------|-------------------|--------|
| fragment_297.1825 | : 0.12 | fragment_213.1275 | : 0.01 | fragment_227.1425 | : 0.01 |
| fragment_279.1725 | : 0.04 | fragment_173.1325 | : 0.01 | fragment_573.3025 | : 0.01 |
| fragment_269.1875 | : 0.04 | fragment_223.1475 | : 0.01 | fragment_255.1375 | : 0.01 |
| fragment_83.0475  | : 0.03 | fragment_587.3175 | : 0.01 |                   |        |
| fragment_385.2375 | : 0.03 | fragment_311.1975 | : 0.01 |                   |        |
| fragment_545.3075 | : 0.03 | fragment_253.1575 | : 0.01 |                   |        |
| fragment_109.1025 | : 0.02 | fragment_215.1425 | : 0.01 |                   |        |
| fragment_397.2375 | : 0.02 | fragment_239.1425 | : 0.01 |                   |        |
| fragment_315.1925 | : 0.02 | loss_137.0725     | : 0.01 |                   |        |
| fragment_567.2925 | : 0.02 | fragment_357.2025 | : 0.01 |                   |        |
| fragment_251.1775 | : 0.02 | fragment_241.1225 | : 0.01 |                   |        |
| fragment_298.1875 | : 0.02 | fragment_427.2475 | : 0.01 |                   |        |
| fragment_445.2575 | : 0.01 | fragment_339.1925 | : 0.01 |                   |        |
| fragment_173.0975 | : 0.01 | fragment_201.0925 | : 0.01 |                   |        |
| fragment_587.3225 | : 0.01 | fragment_403.2475 | : 0.01 |                   |        |
| fragment_161.0975 | : 0.01 | fragment_229.1225 | : 0.01 |                   |        |
| fragment_199.1125 | : 0.01 | fragment_463.2675 | : 0.01 |                   |        |
| fragment_241.1575 | : 0.01 | fragment_145.1025 | : 0.01 |                   |        |
| fragment_357.2075 | : 0.01 | fragment_546.3125 | : 0.01 |                   |        |
| fragment_367.2275 | : 0.01 | fragment_329.2075 | : 0.01 |                   |        |



urine\_mass2motif\_180.m2m

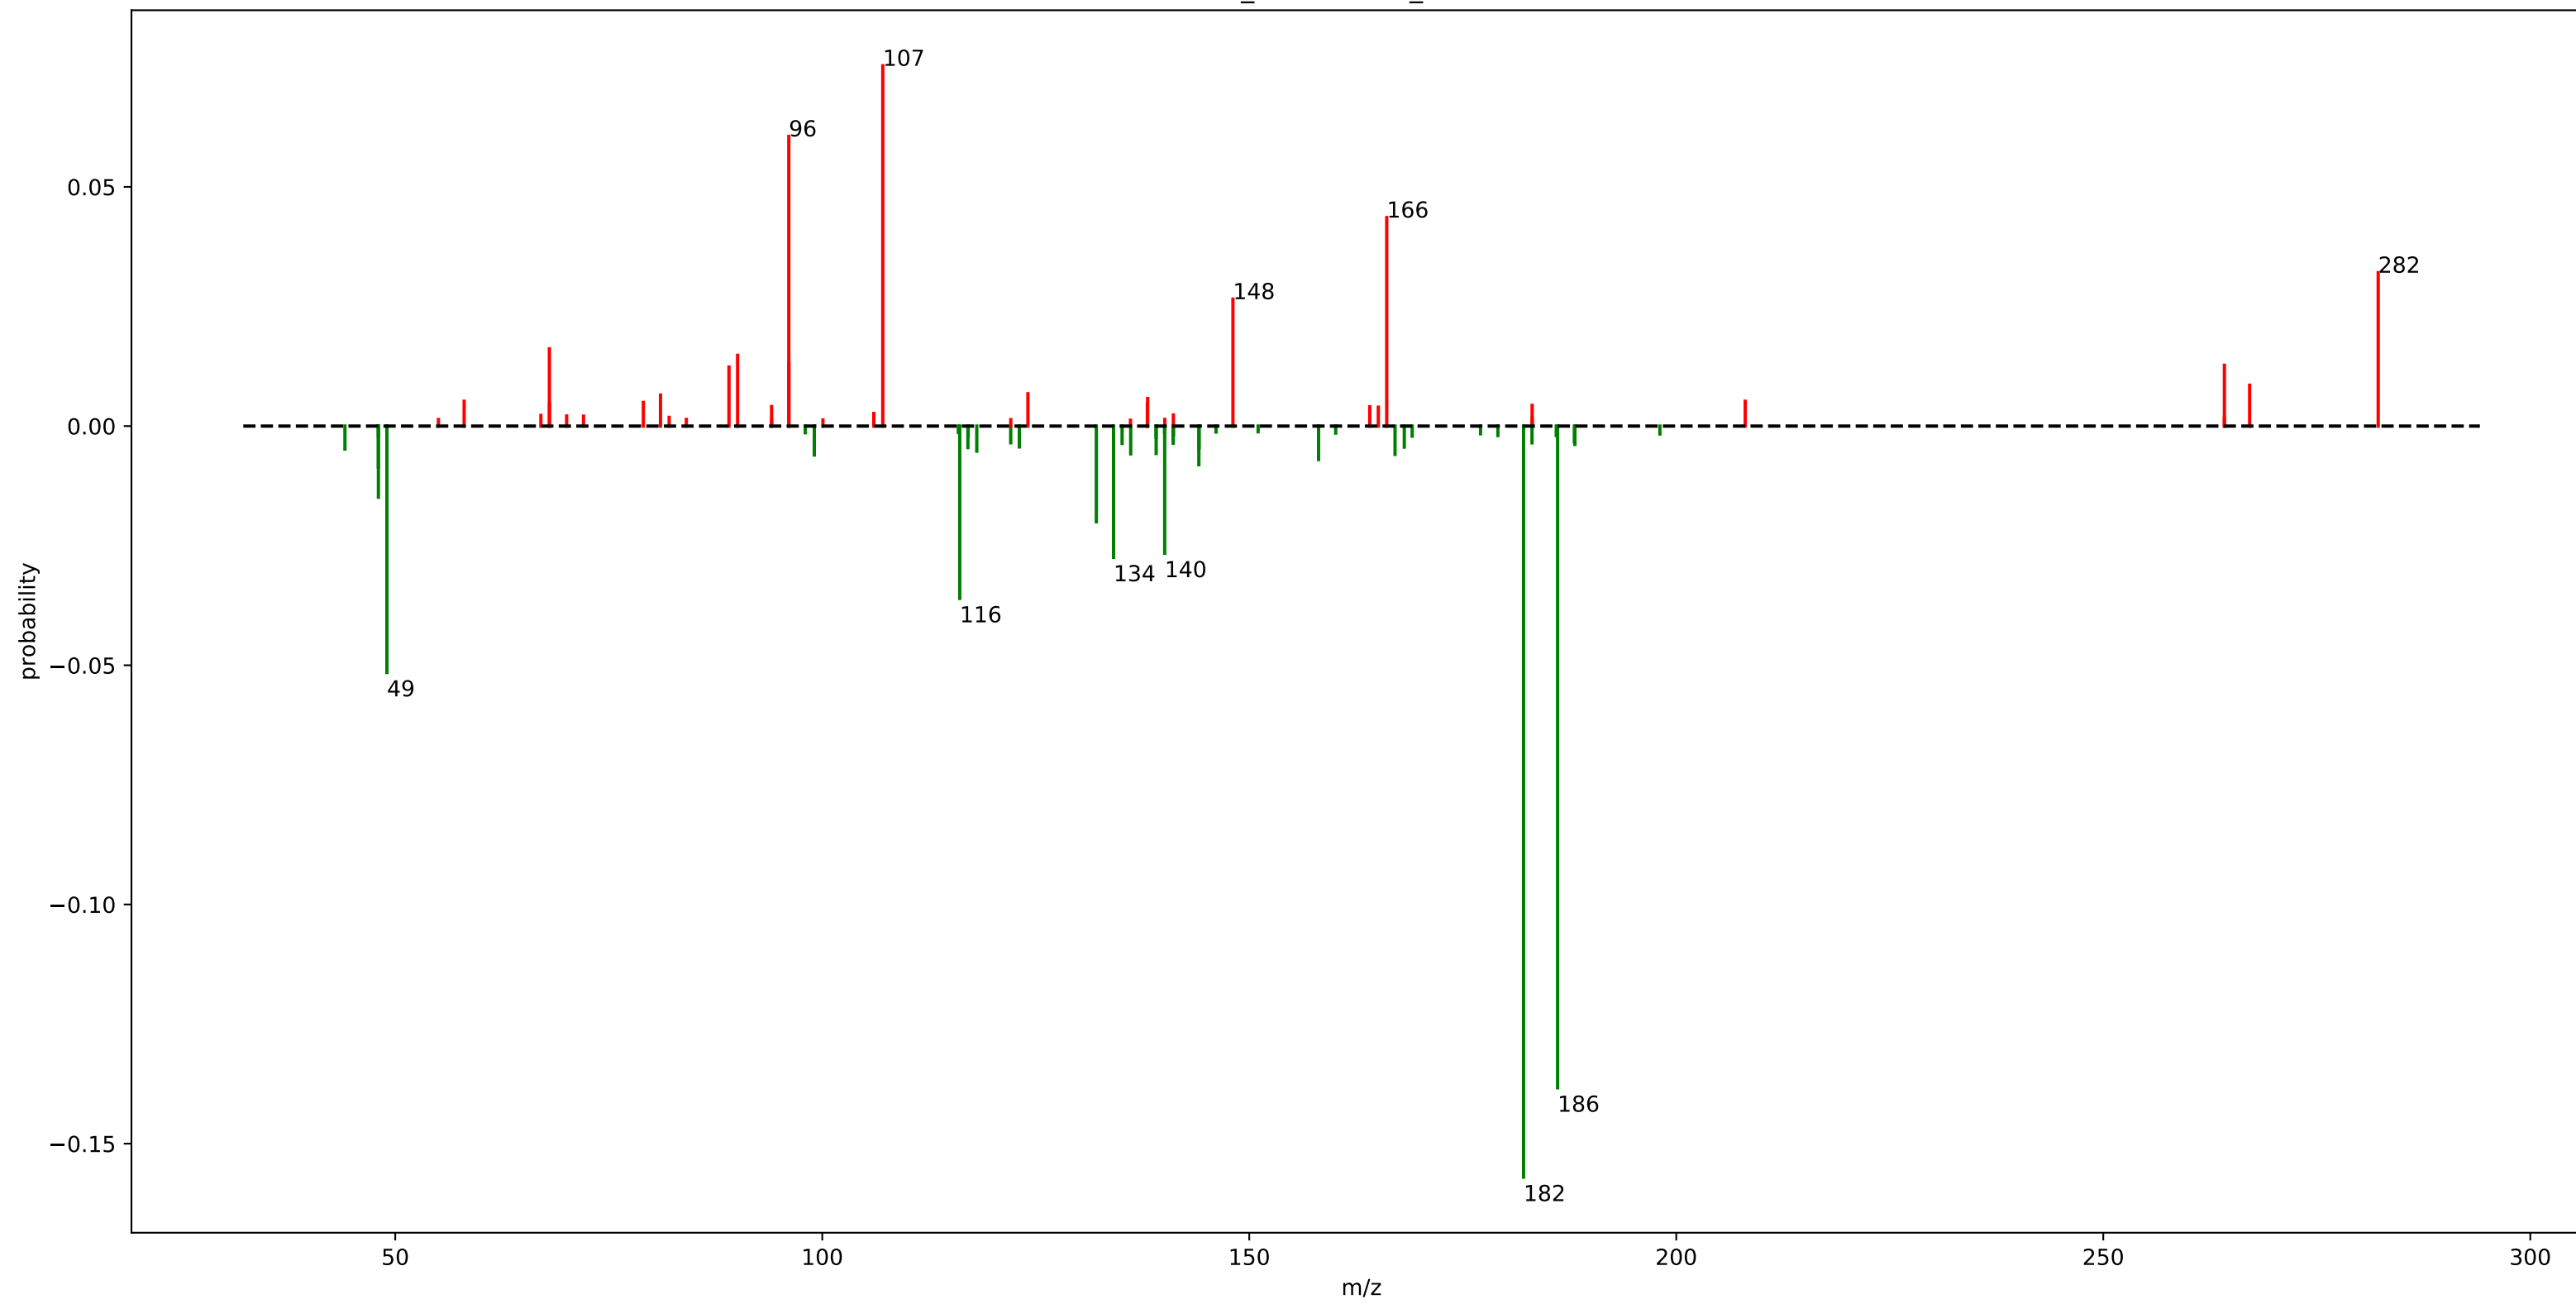

## urine\_mass2motif\_180.m2m

|                   |        |                   |        |
|-------------------|--------|-------------------|--------|
| loss_182.1175     | : 0.16 | loss_144.0975     | : 0.01 |
| loss_186.1025     | : 0.14 | loss_158.1175     | : 0.01 |
| fragment_107.0875 | : 0.08 | fragment_124.0825 | : 0.01 |
| fragment_96.0825  | : 0.06 | fragment_81.0575  | : 0.01 |
| loss_49.0225      | : 0.05 | loss_99.0675      | : 0.01 |
| fragment_166.0975 | : 0.04 | loss_167.0675     | : 0.01 |
| loss_116.0975     | : 0.04 | loss_136.1175     | : 0.01 |
| fragment_282.1925 | : 0.03 | fragment_138.1025 | : 0.01 |
| loss_134.1075     | : 0.03 | loss_139.0975     | : 0.01 |
| loss_140.0975     | : 0.03 | loss_118.0925     | : 0.01 |
| fragment_148.0875 | : 0.03 | fragment_208.0725 | : 0.01 |
| loss_132.0925     | : 0.02 | fragment_58.0675  | : 0.01 |
| fragment_68.0475  | : 0.02 |                   |        |
| loss_48.0275      | : 0.01 |                   |        |
| fragment_90.0875  | : 0.01 |                   |        |
| fragment_96.0875  | : 0.01 |                   |        |
| fragment_264.1825 | : 0.01 |                   |        |
| fragment_89.0775  | : 0.01 |                   |        |
| loss_48.0175      | : 0.01 |                   |        |
| fragment_267.1375 | : 0.01 |                   |        |

gnps\_motif\_11.m2m

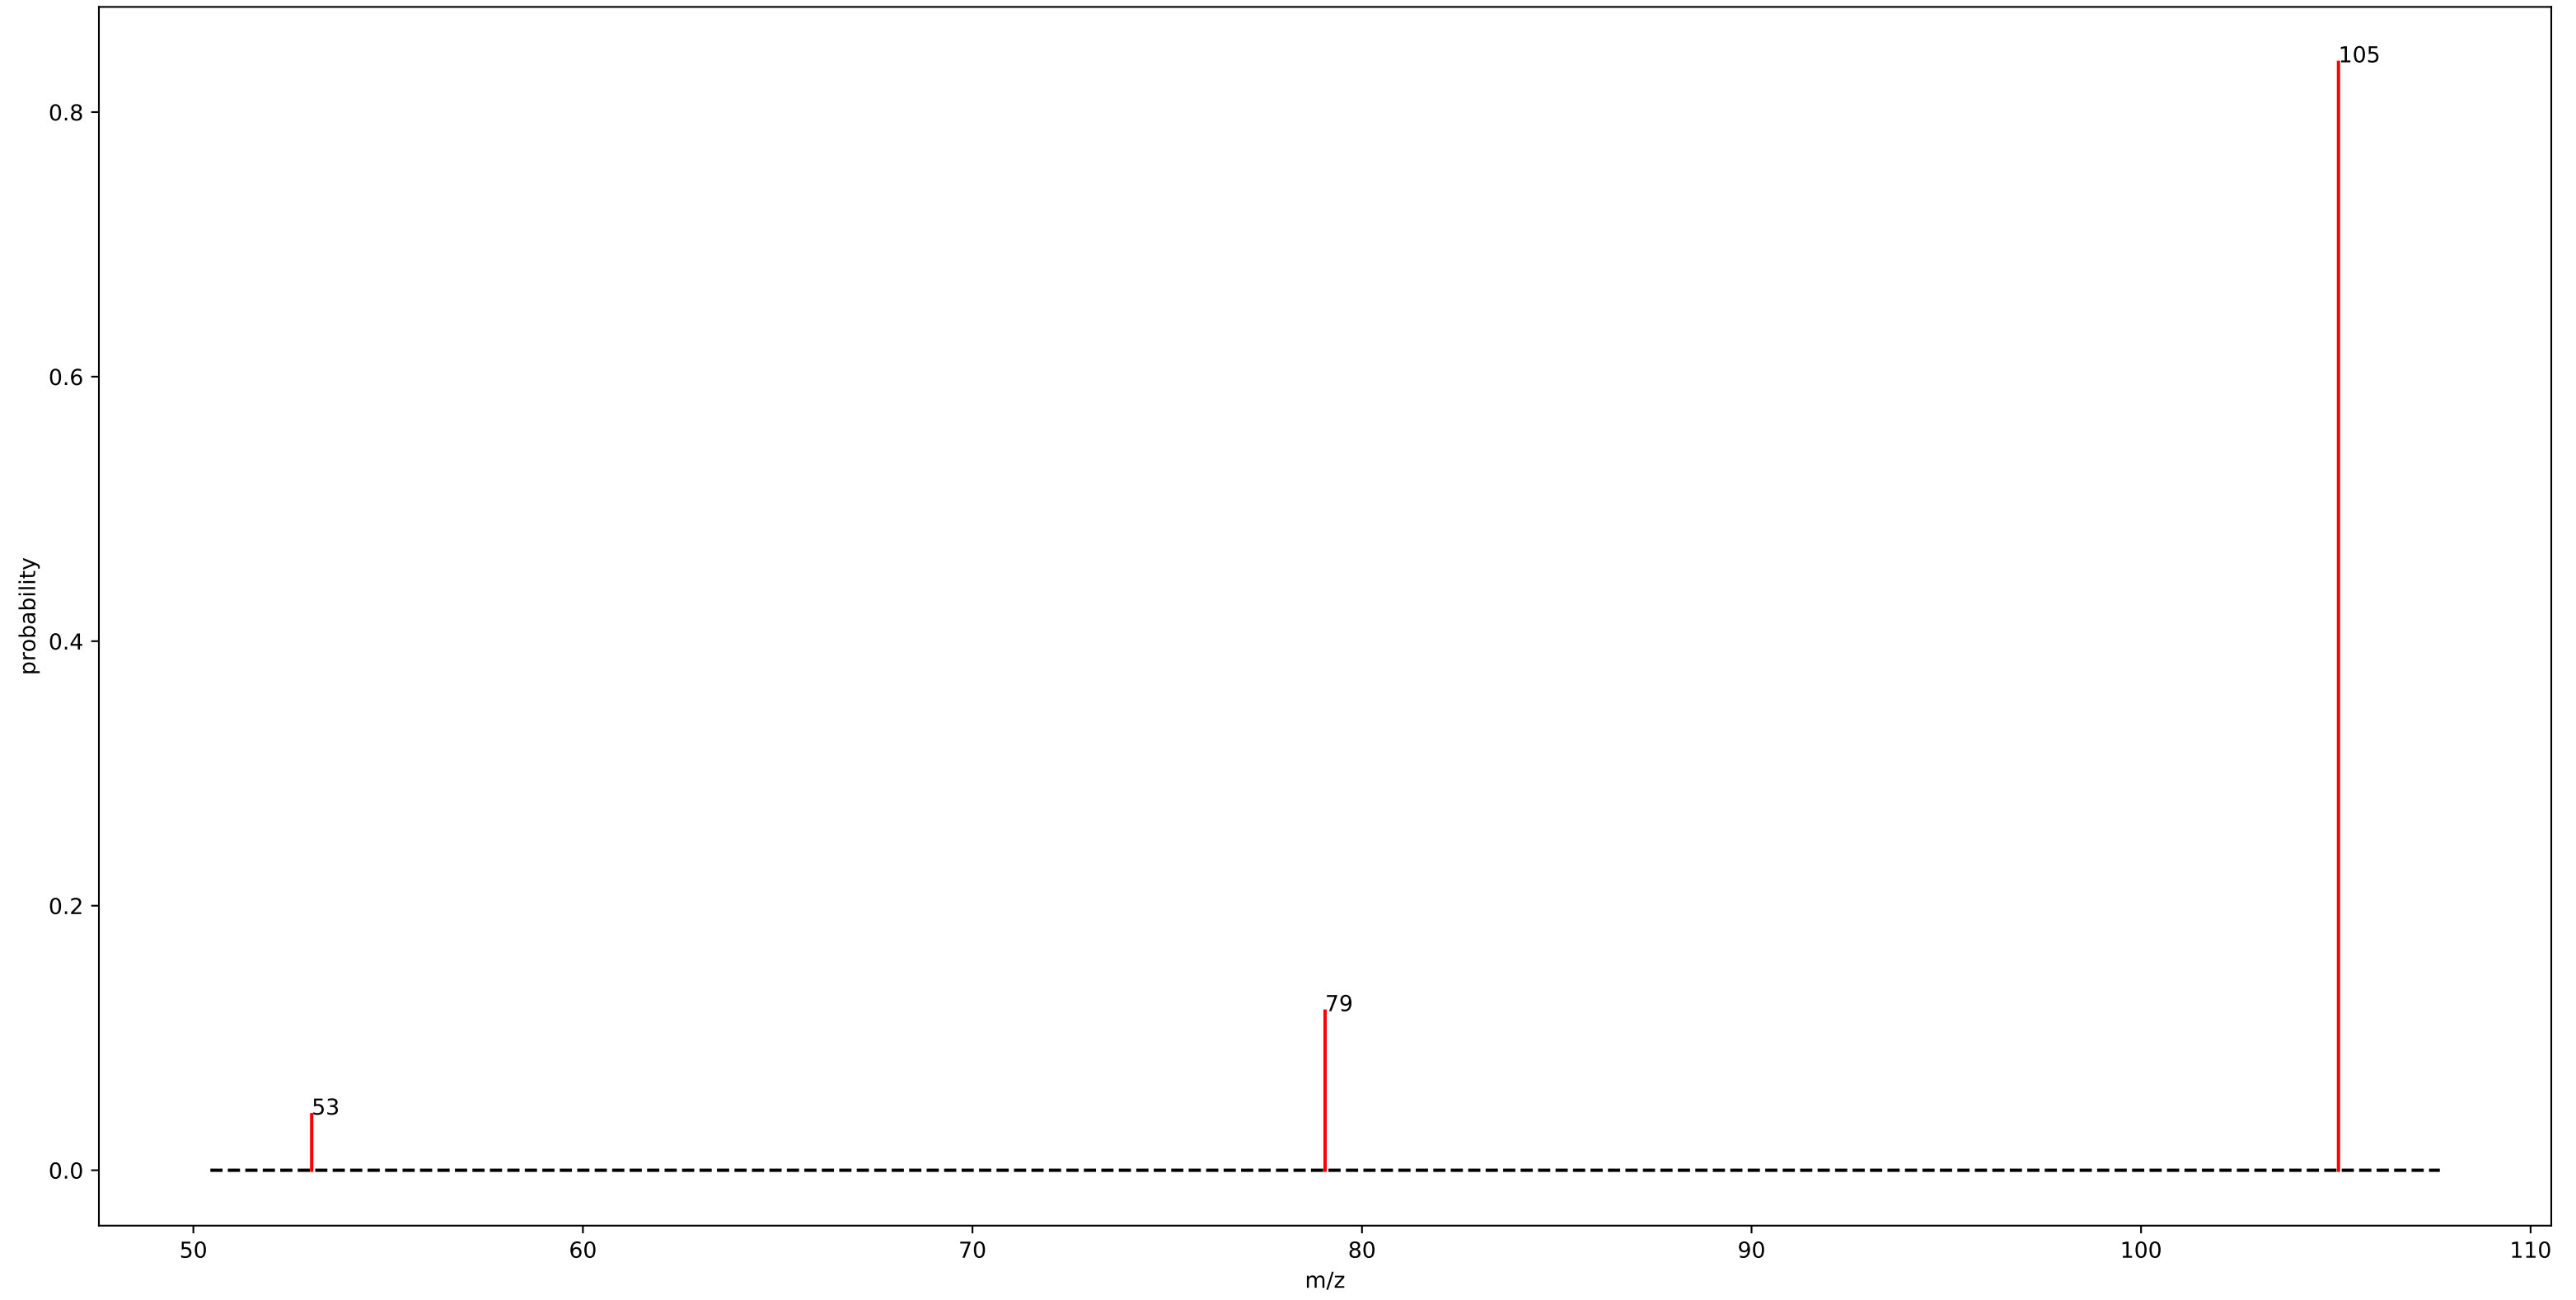

## gnps\_motif\_11.m2m

|                   |        |
|-------------------|--------|
| fragment_105.0675 | : 0.84 |
| fragment_79.0525  | : 0.12 |
| fragment_53.0375  | : 0.04 |

rhabdus\_motif\_51.m2m

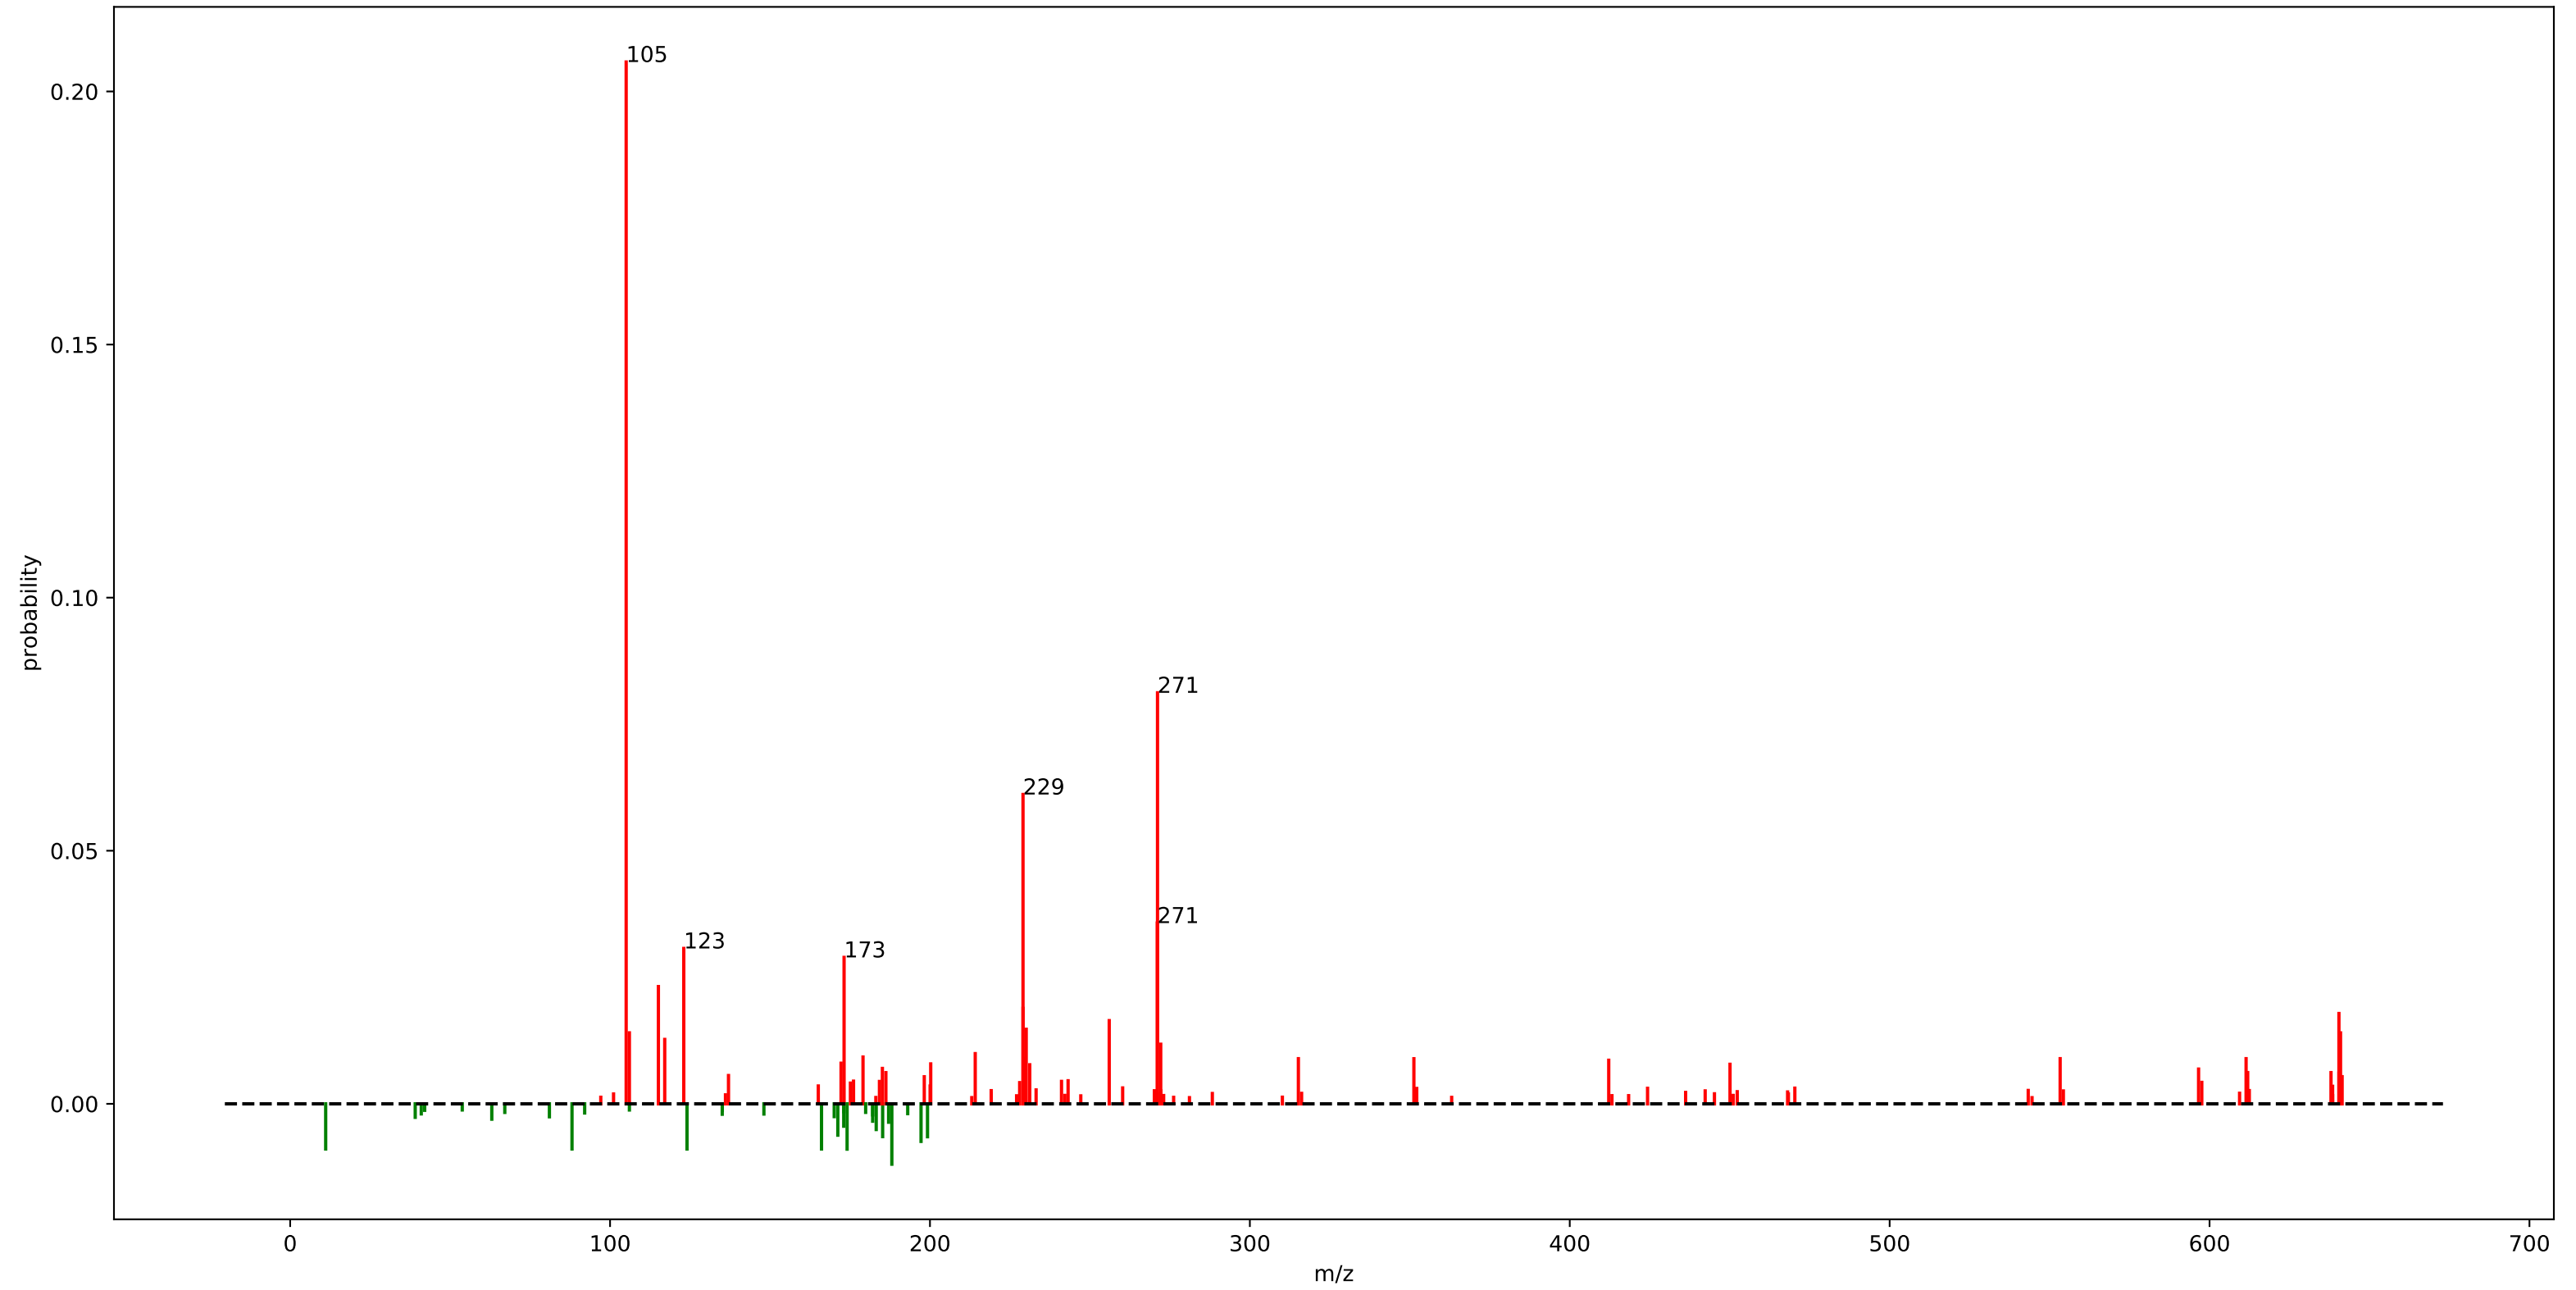

# rhabdus\_motif\_51.m2m

|                   |        |                   |        |                   |        |
|-------------------|--------|-------------------|--------|-------------------|--------|
| fragment_105.0325 | : 0.21 | loss_166.1025     | : 0.01 | fragment_637.9675 | : 0.01 |
| fragment_271.1325 | : 0.08 | loss_11.1025      | : 0.01 | fragment_186.2225 | : 0.01 |
| fragment_229.0875 | : 0.06 | loss_124.0525     | : 0.01 | fragment_640.4525 | : 0.01 |
| fragment_271.0575 | : 0.04 | fragment_553.2975 | : 0.01 | fragment_137.0225 | : 0.01 |
| fragment_123.0425 | : 0.03 | fragment_611.4225 | : 0.01 | fragment_641.4475 | : 0.01 |
| fragment_173.1525 | : 0.03 | fragment_315.1675 | : 0.01 | fragment_198.2225 | : 0.01 |
| fragment_115.1075 | : 0.02 | loss_88.1025      | : 0.01 | loss_183.1975     | : 0.01 |
| fragment_229.0975 | : 0.02 | fragment_351.2775 | : 0.01 |                   |        |
| fragment_640.4475 | : 0.02 | fragment_412.1875 | : 0.01 |                   |        |
| fragment_256.0375 | : 0.02 | fragment_172.2075 | : 0.01 |                   |        |
| fragment_230.0875 | : 0.01 | fragment_200.2375 | : 0.01 |                   |        |
| fragment_106.0375 | : 0.01 | fragment_450.0975 | : 0.01 |                   |        |
| fragment_640.9475 | : 0.01 | fragment_231.1975 | : 0.01 |                   |        |
| fragment_117.0875 | : 0.01 | loss_197.2125     | : 0.01 |                   |        |
| loss_188.0825     | : 0.01 | fragment_185.1325 | : 0.01 |                   |        |
| fragment_272.1375 | : 0.01 | fragment_596.5725 | : 0.01 |                   |        |
| fragment_214.1525 | : 0.01 | loss_199.2325     | : 0.01 |                   |        |
| fragment_179.0725 | : 0.01 | loss_185.2125     | : 0.01 |                   |        |
| loss_174.0975     | : 0.01 | loss_171.1975     | : 0.01 |                   |        |
| fragment_229.1625 | : 0.01 | fragment_611.9275 | : 0.01 |                   |        |

motif\_481

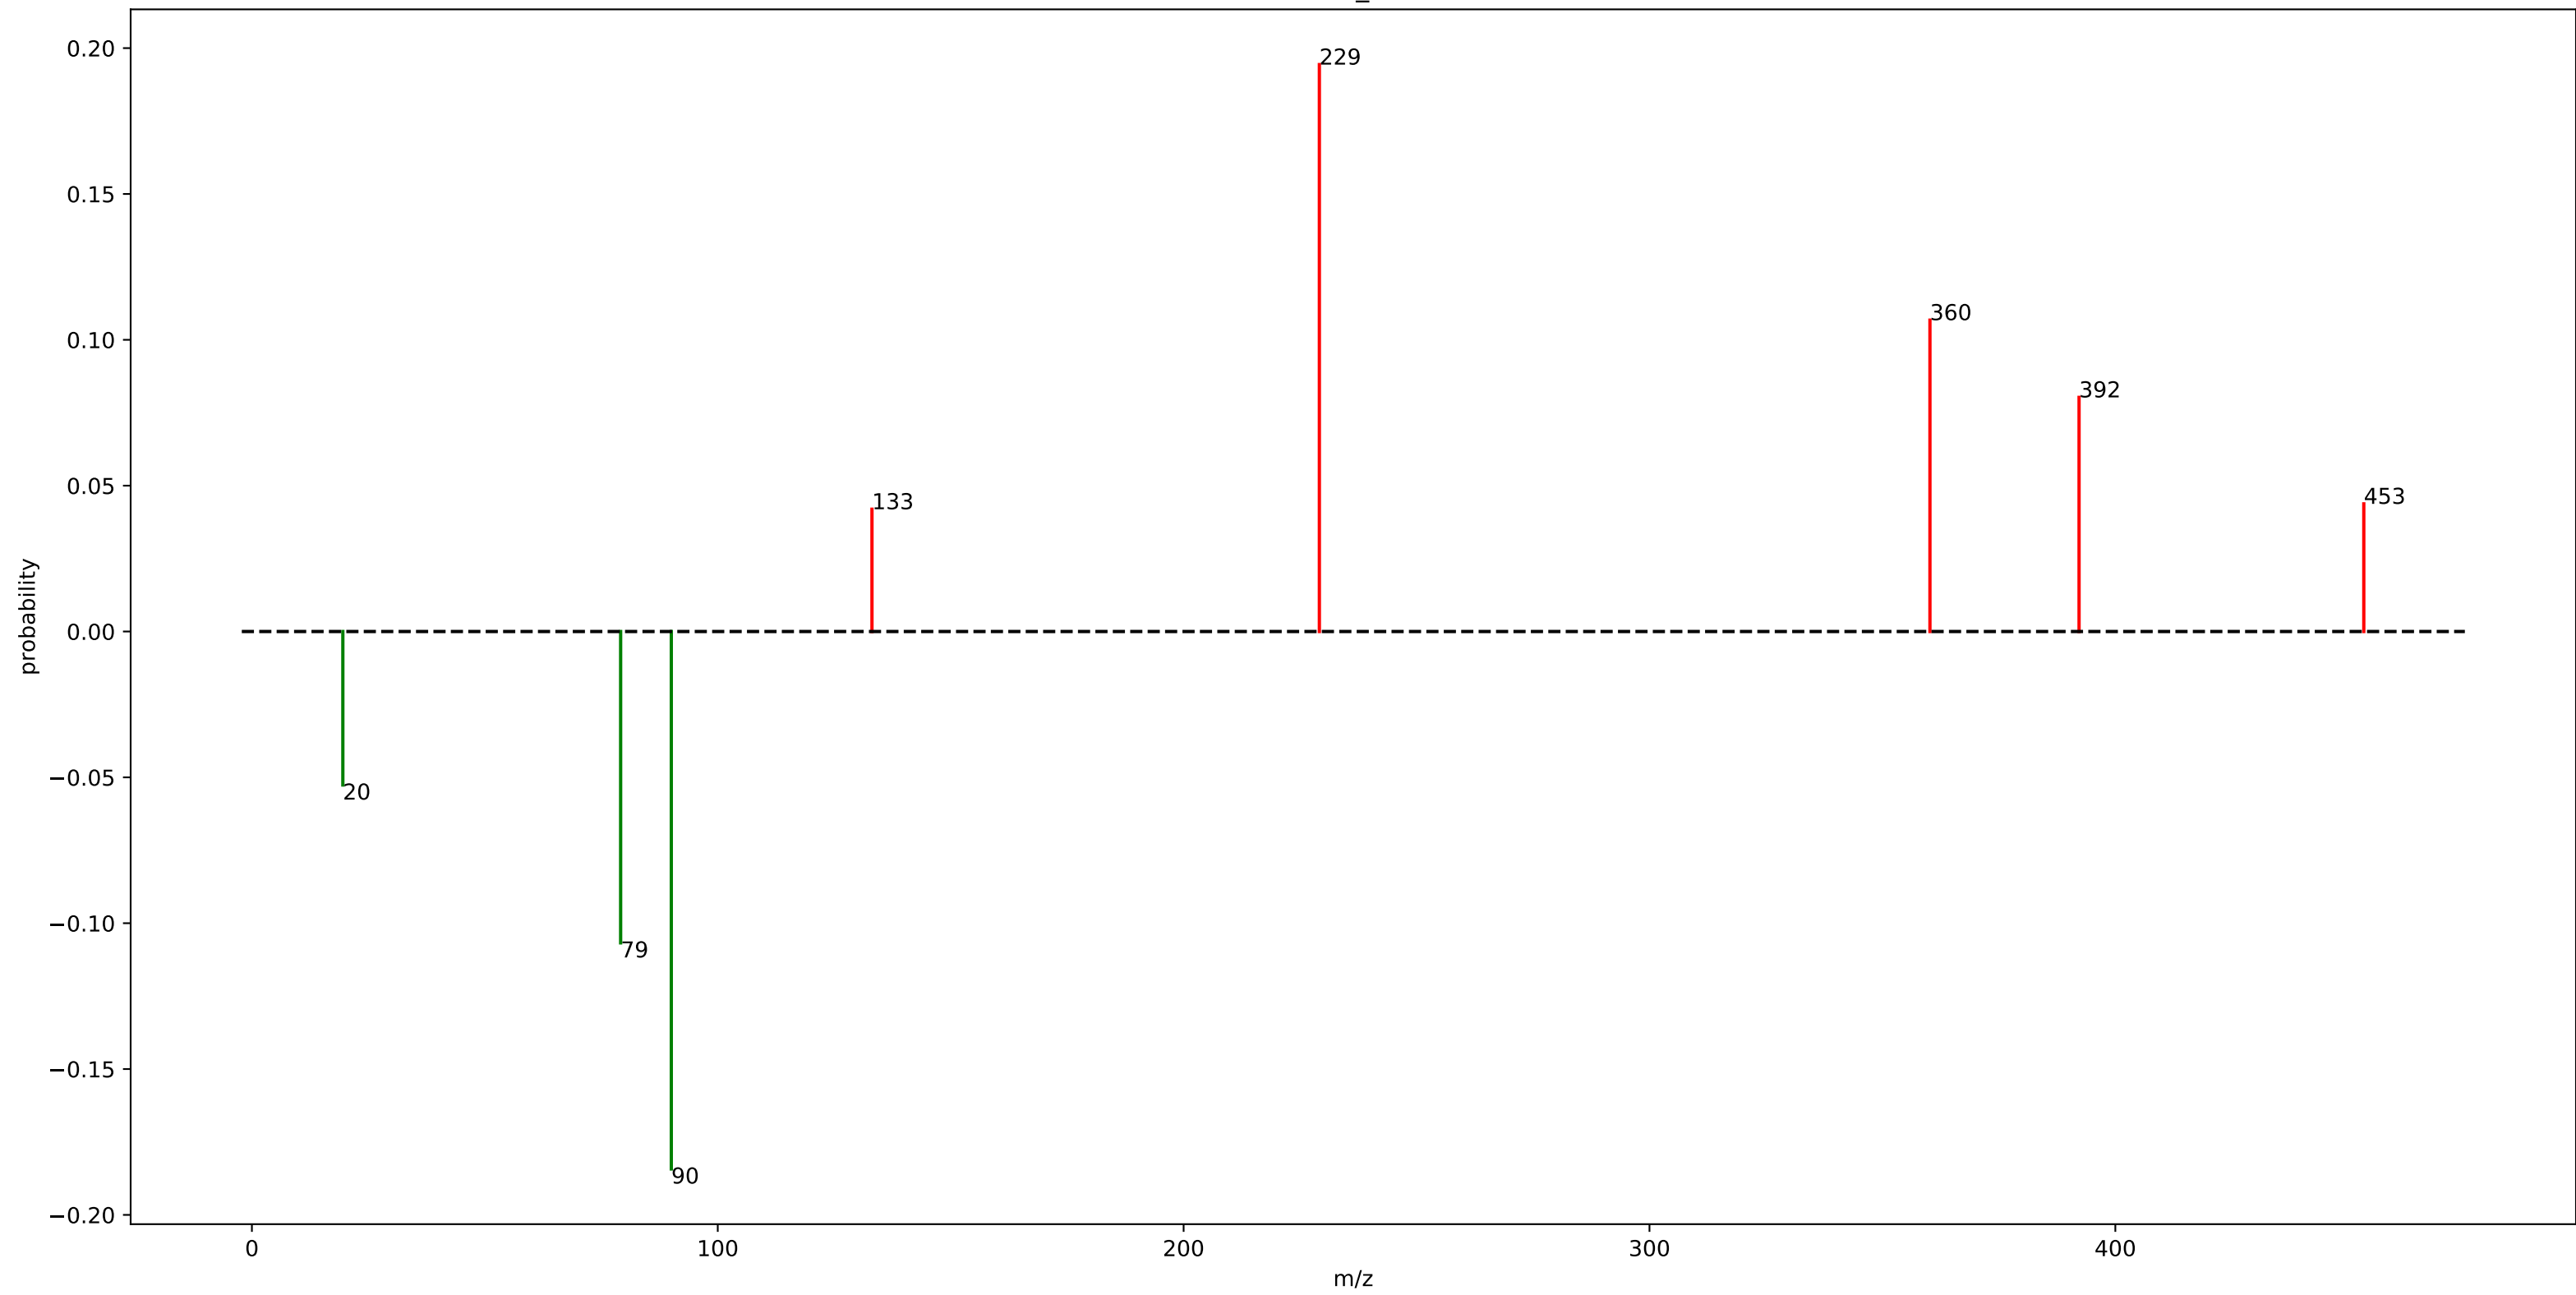

## motif\_481

|                   |        |
|-------------------|--------|
| fragment_229.1375 | : 0.19 |
| loss_90.0275      | : 0.18 |
| fragment_360.2025 | : 0.11 |
| loss_79.1525      | : 0.11 |
| fragment_392.2125 | : 0.08 |
| loss_19.5225      | : 0.05 |
| fragment_453.3325 | : 0.04 |
| fragment_133.1025 | : 0.04 |



motif\_480

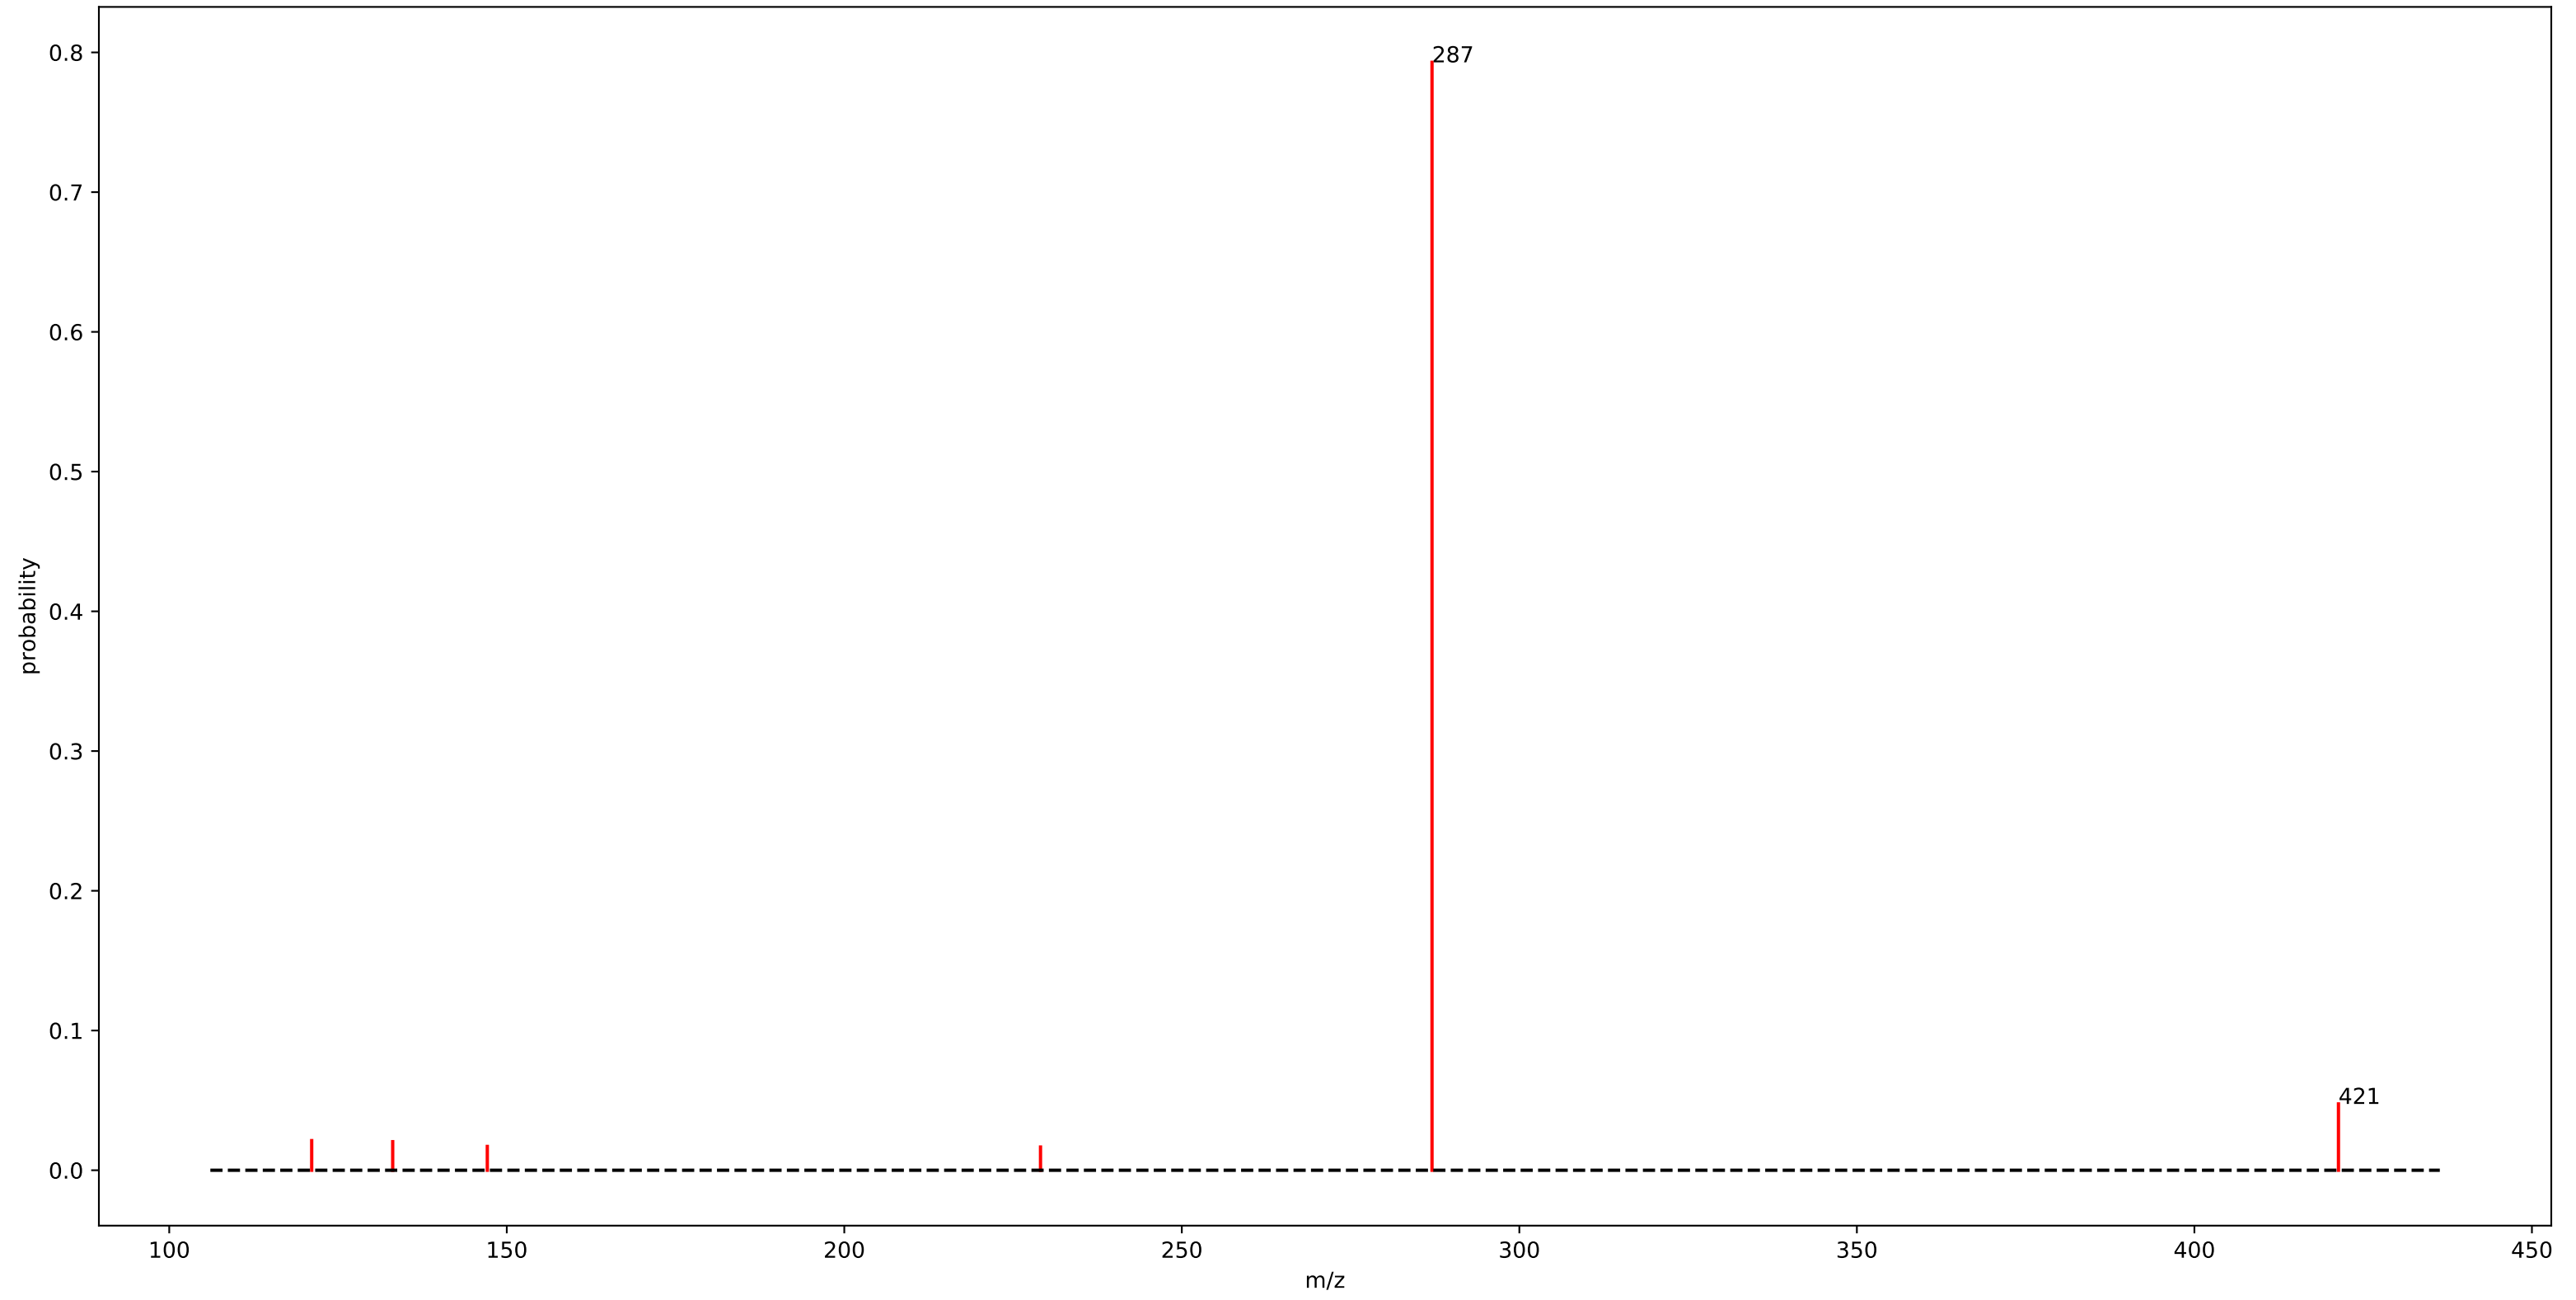

## motif\_480

|                   |        |
|-------------------|--------|
| fragment_287.0625 | : 0.79 |
| fragment_421.3425 | : 0.05 |
| fragment_121.1025 | : 0.02 |
| fragment_133.1025 | : 0.02 |
| fragment_147.1175 | : 0.02 |
| fragment_229.0675 | : 0.02 |

motif\_483

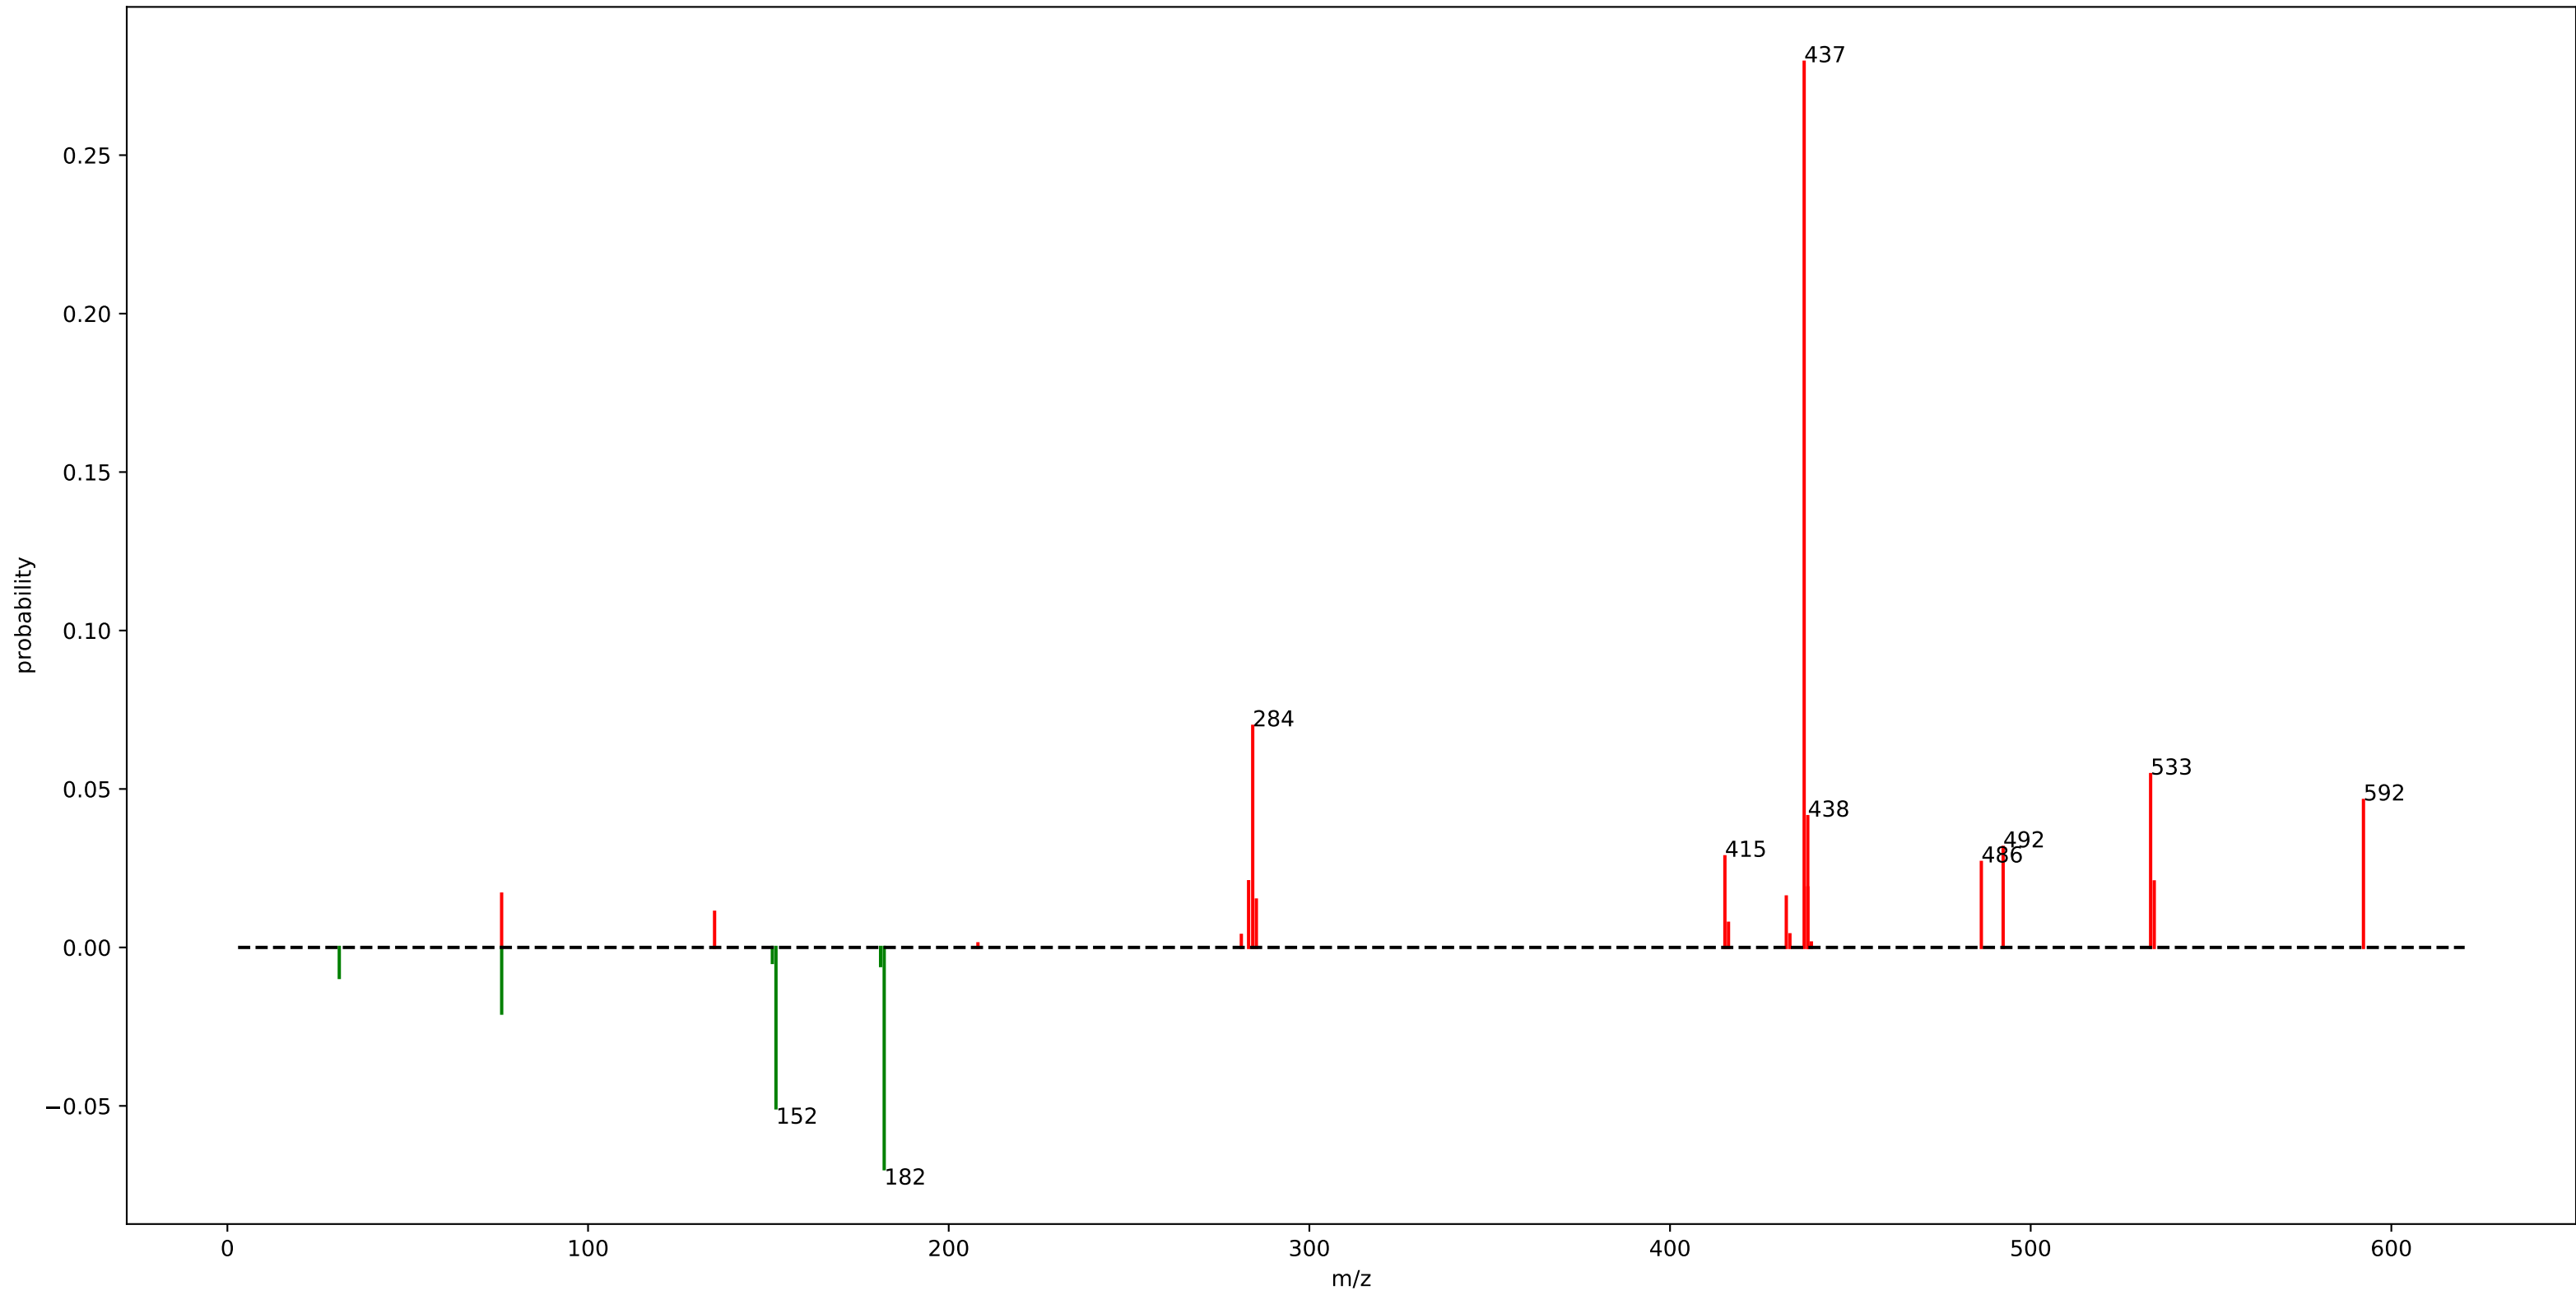

## motif\_483

|                   |        |               |        |
|-------------------|--------|---------------|--------|
| fragment_437.1925 | : 0.28 | loss_181.1125 | : 0.01 |
| loss_182.1125     | : 0.07 |               |        |
| fragment_284.2925 | : 0.07 |               |        |
| fragment_533.2525 | : 0.05 |               |        |
| loss_152.1025     | : 0.05 |               |        |
| fragment_592.2675 | : 0.05 |               |        |
| fragment_438.1975 | : 0.04 |               |        |
| fragment_492.3625 | : 0.03 |               |        |
| fragment_415.2125 | : 0.03 |               |        |
| fragment_486.3175 | : 0.03 |               |        |
| fragment_283.1475 | : 0.02 |               |        |
| loss_76.0525      | : 0.02 |               |        |
| fragment_534.2575 | : 0.02 |               |        |
| fragment_438.2025 | : 0.02 |               |        |
| fragment_76.0375  | : 0.02 |               |        |
| fragment_432.2375 | : 0.02 |               |        |
| fragment_285.2975 | : 0.01 |               |        |
| fragment_135.0825 | : 0.01 |               |        |
| loss_31.0225      | : 0.01 |               |        |
| fragment_416.2125 | : 0.01 |               |        |

motif\_482

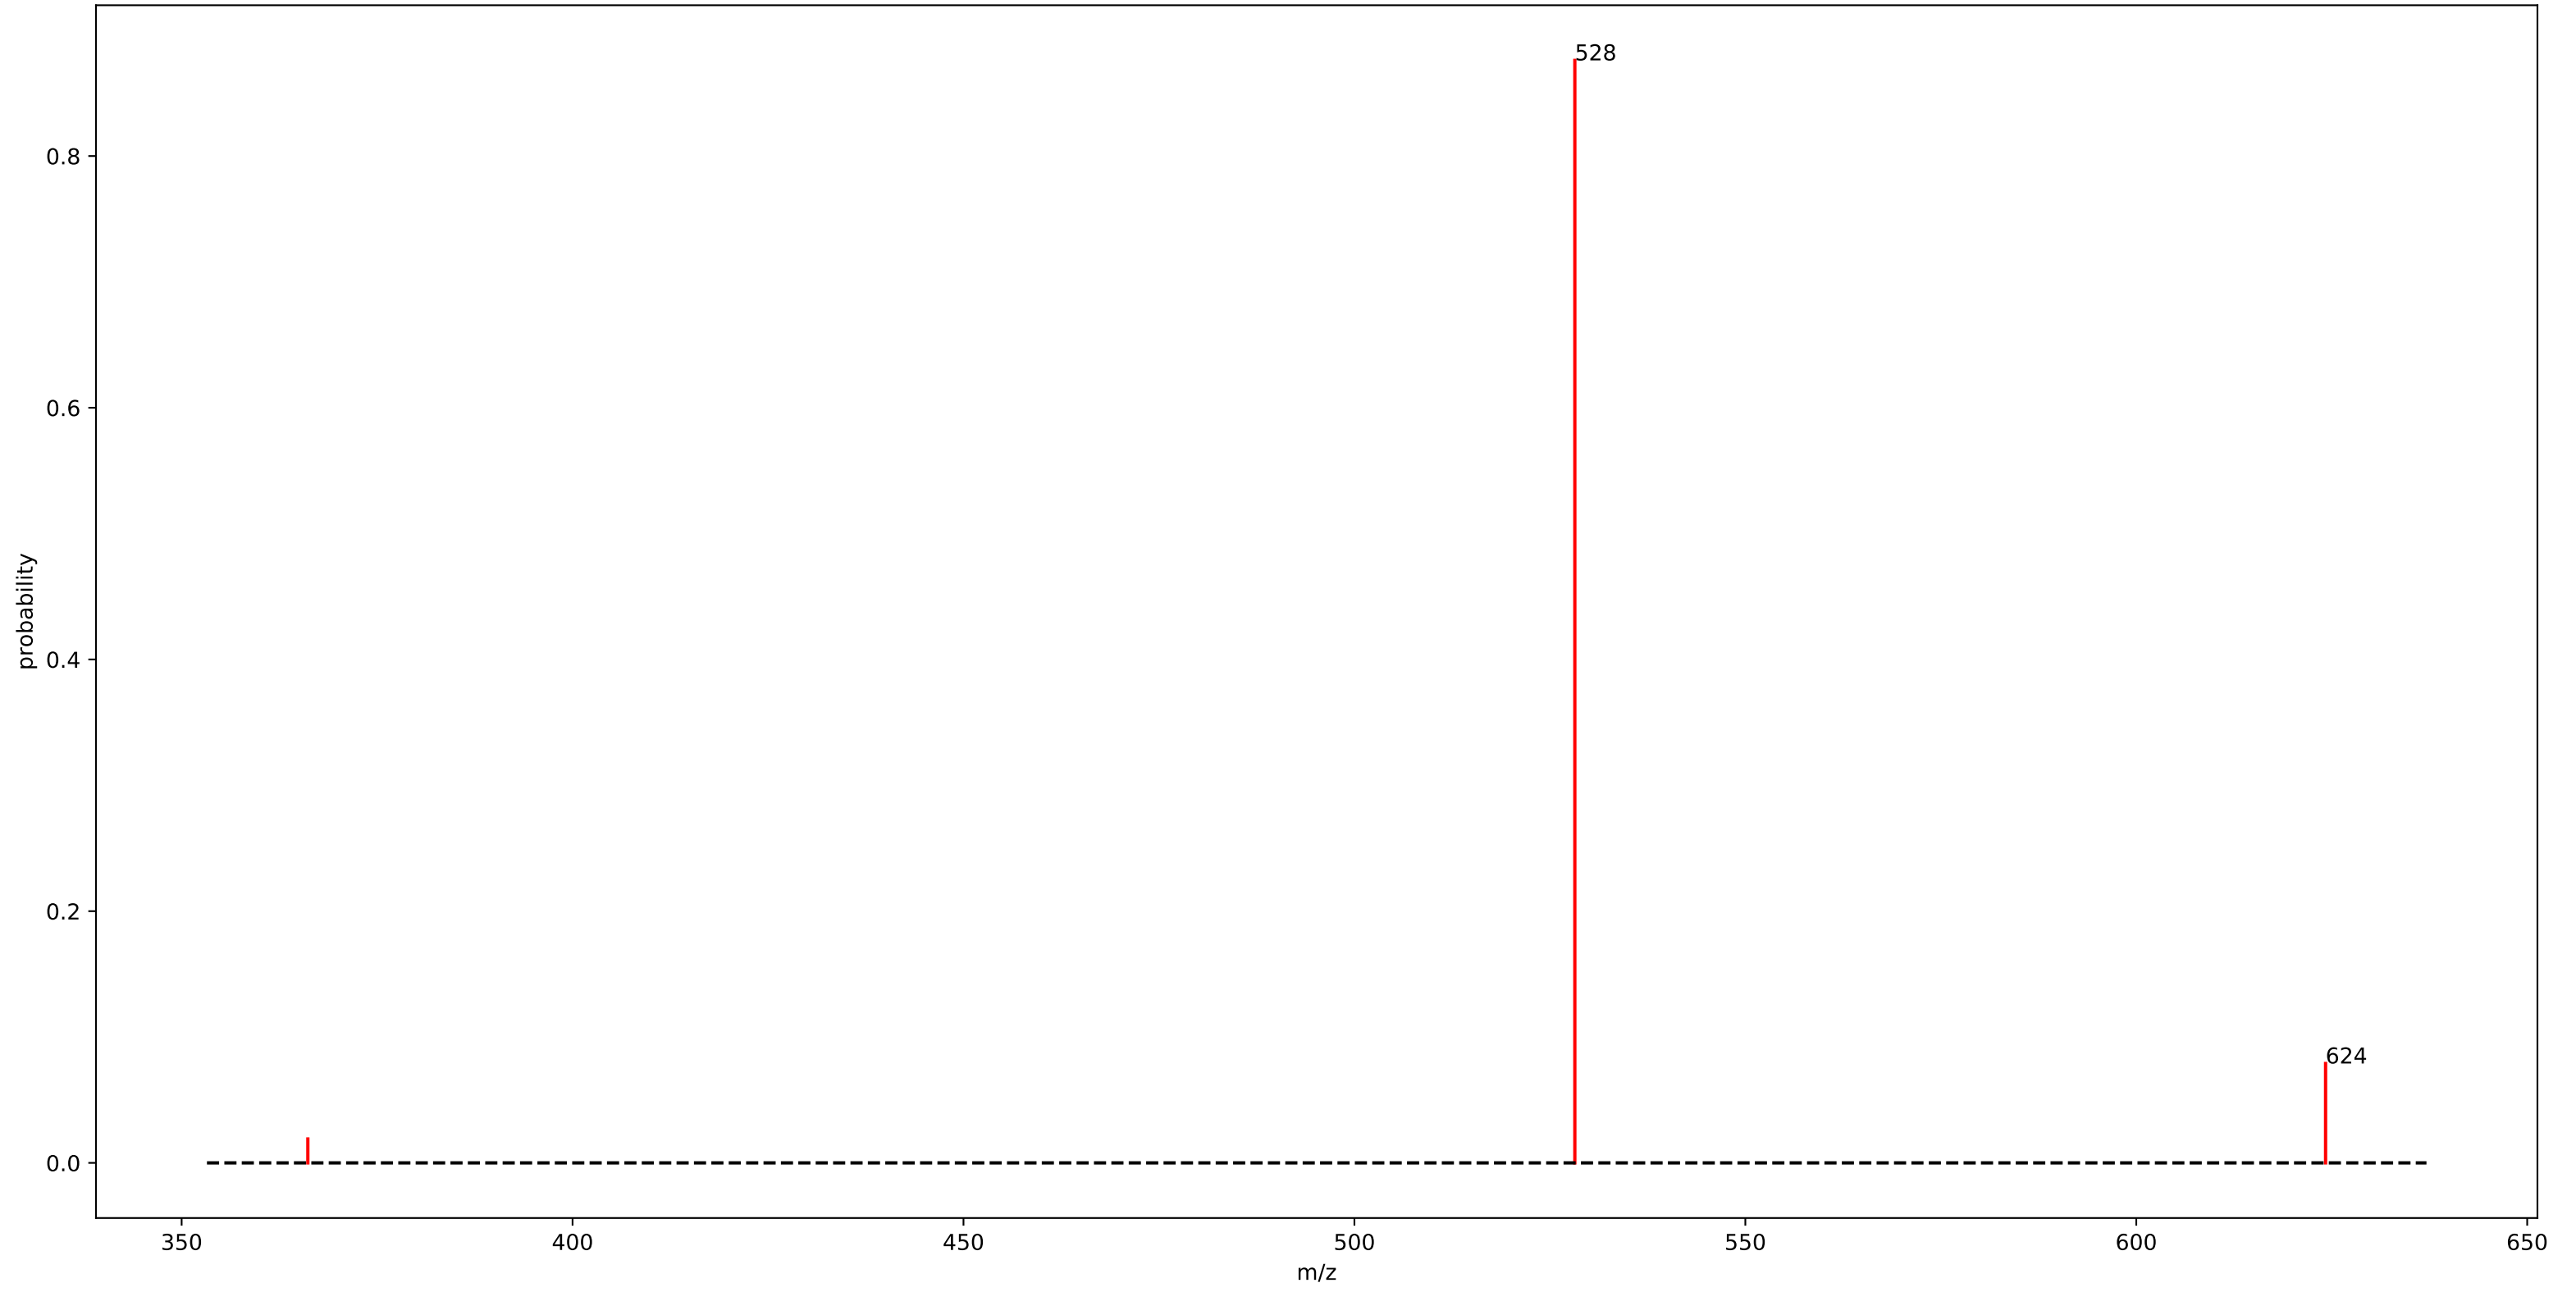

## motif\_482

|                   |        |
|-------------------|--------|
| fragment_528.1925 | : 0.88 |
| fragment_624.2125 | : 0.08 |
| fragment_366.1425 | : 0.02 |

motif\_485

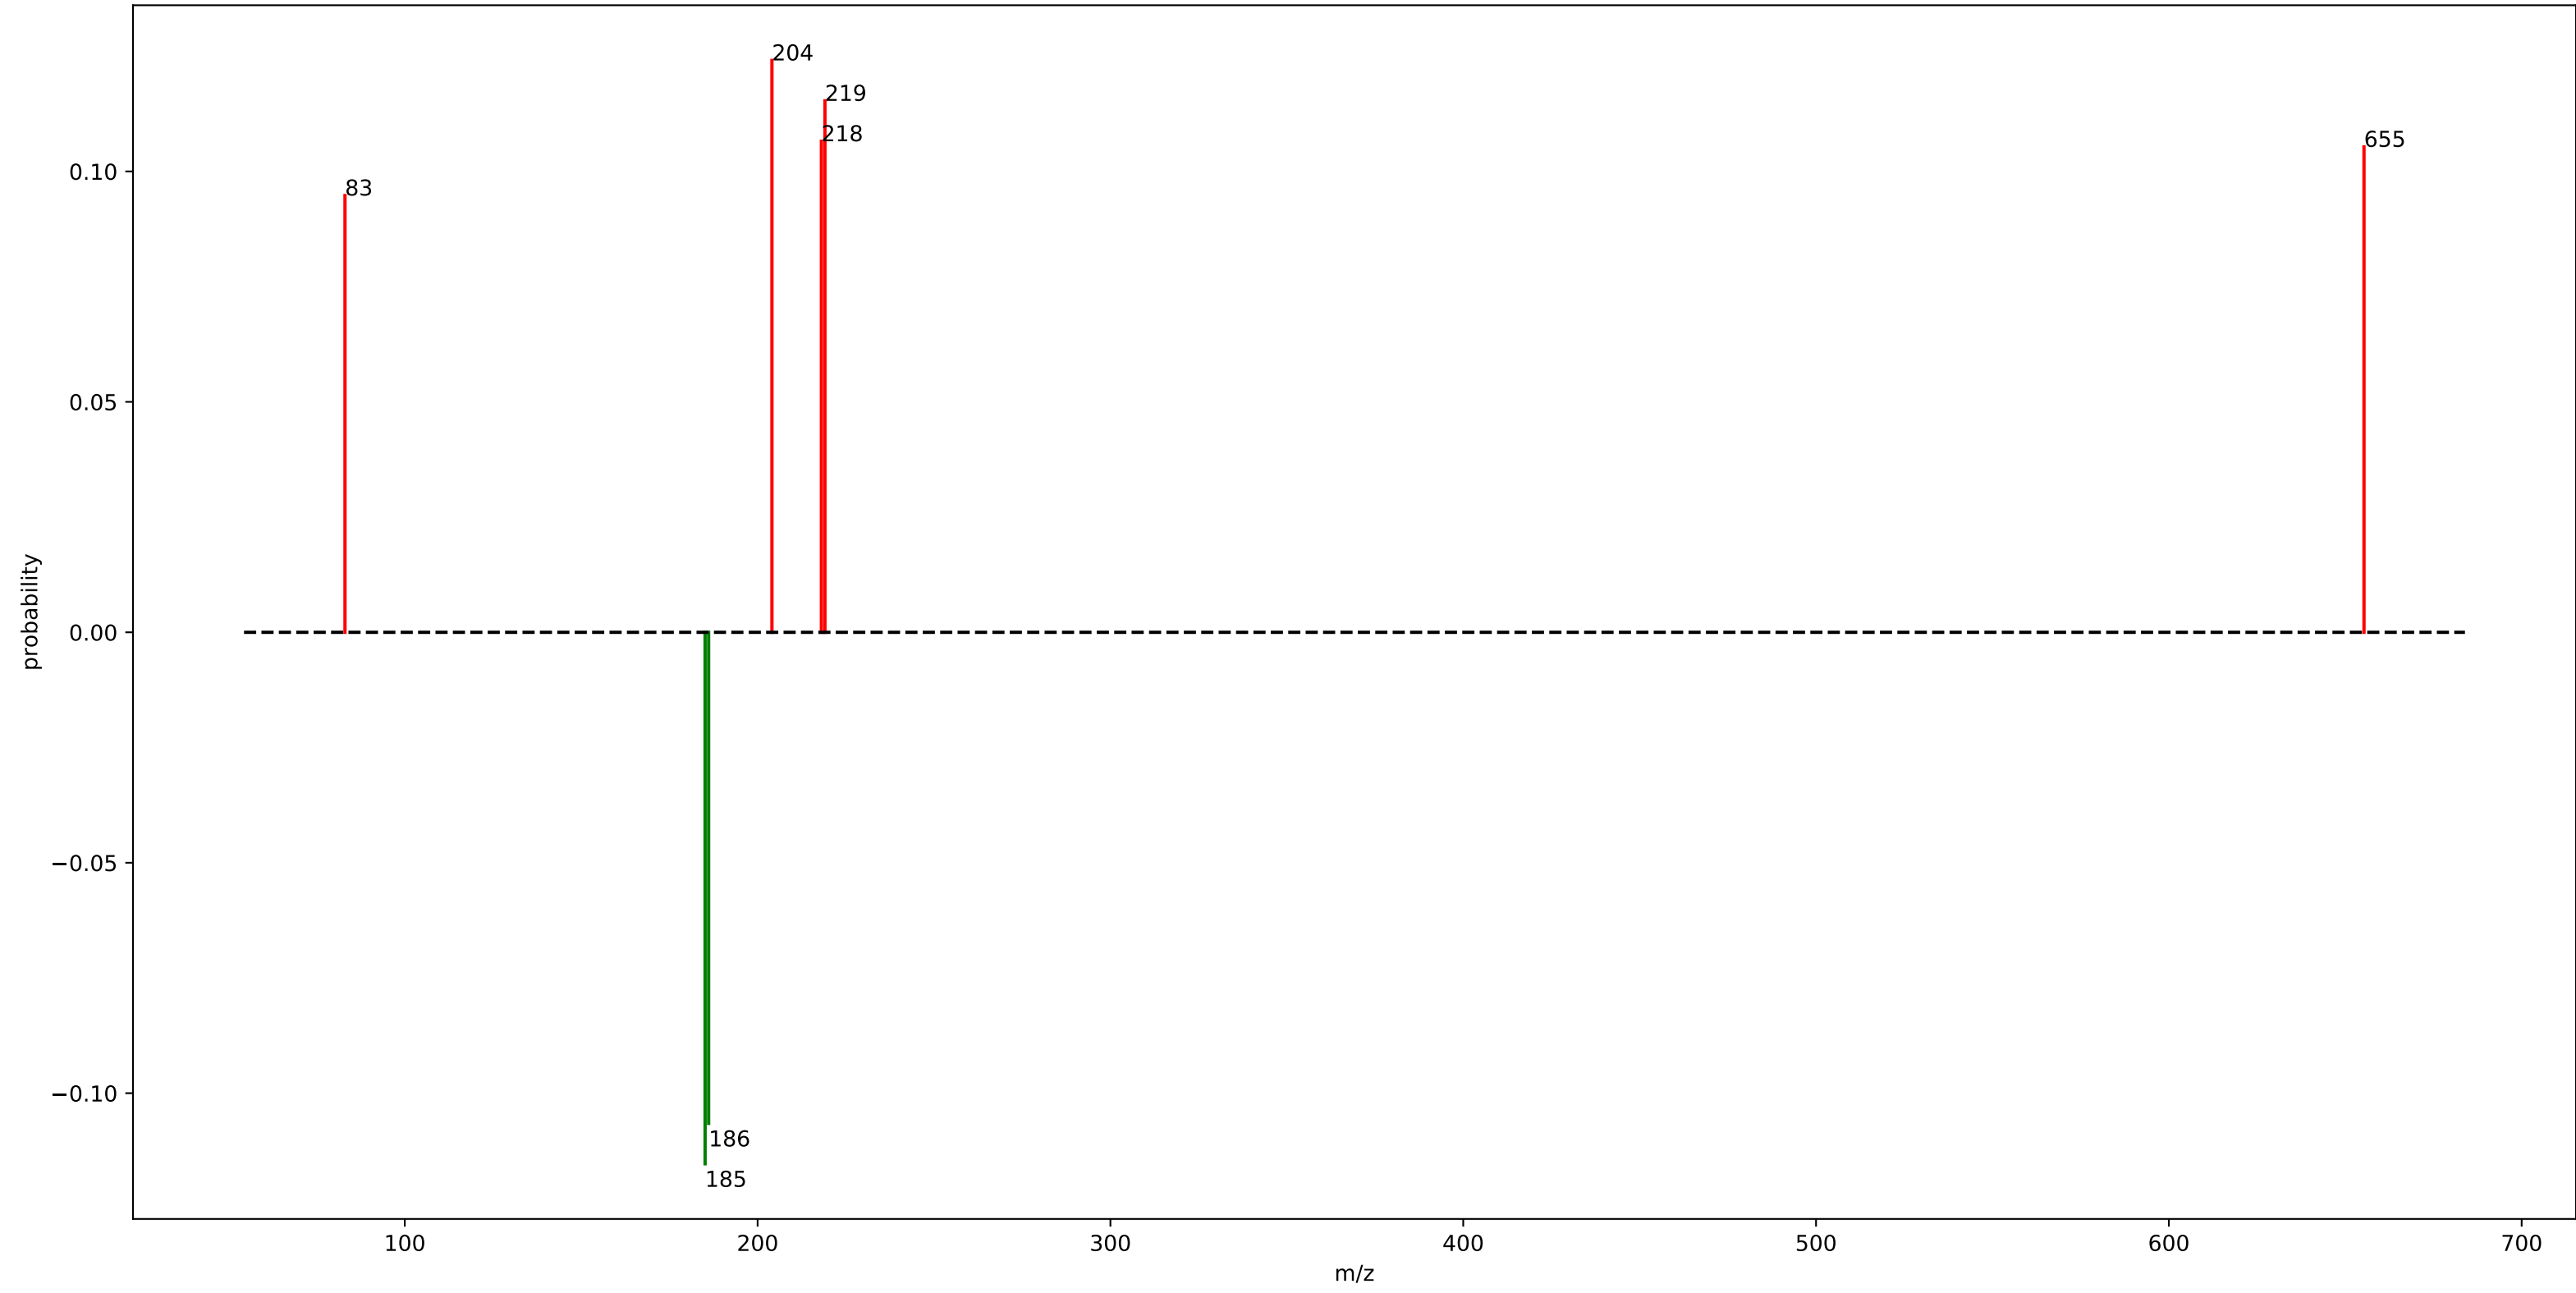

## motif\_485

|                   |        |
|-------------------|--------|
| fragment_204.0625 | : 0.12 |
| fragment_219.0875 | : 0.12 |
| loss_185.1175     | : 0.12 |
| fragment_218.0825 | : 0.11 |
| loss_186.1225     | : 0.11 |
| fragment_655.3125 | : 0.11 |
| fragment_83.0475  | : 0.09 |



gnps\_motif\_10.m2m

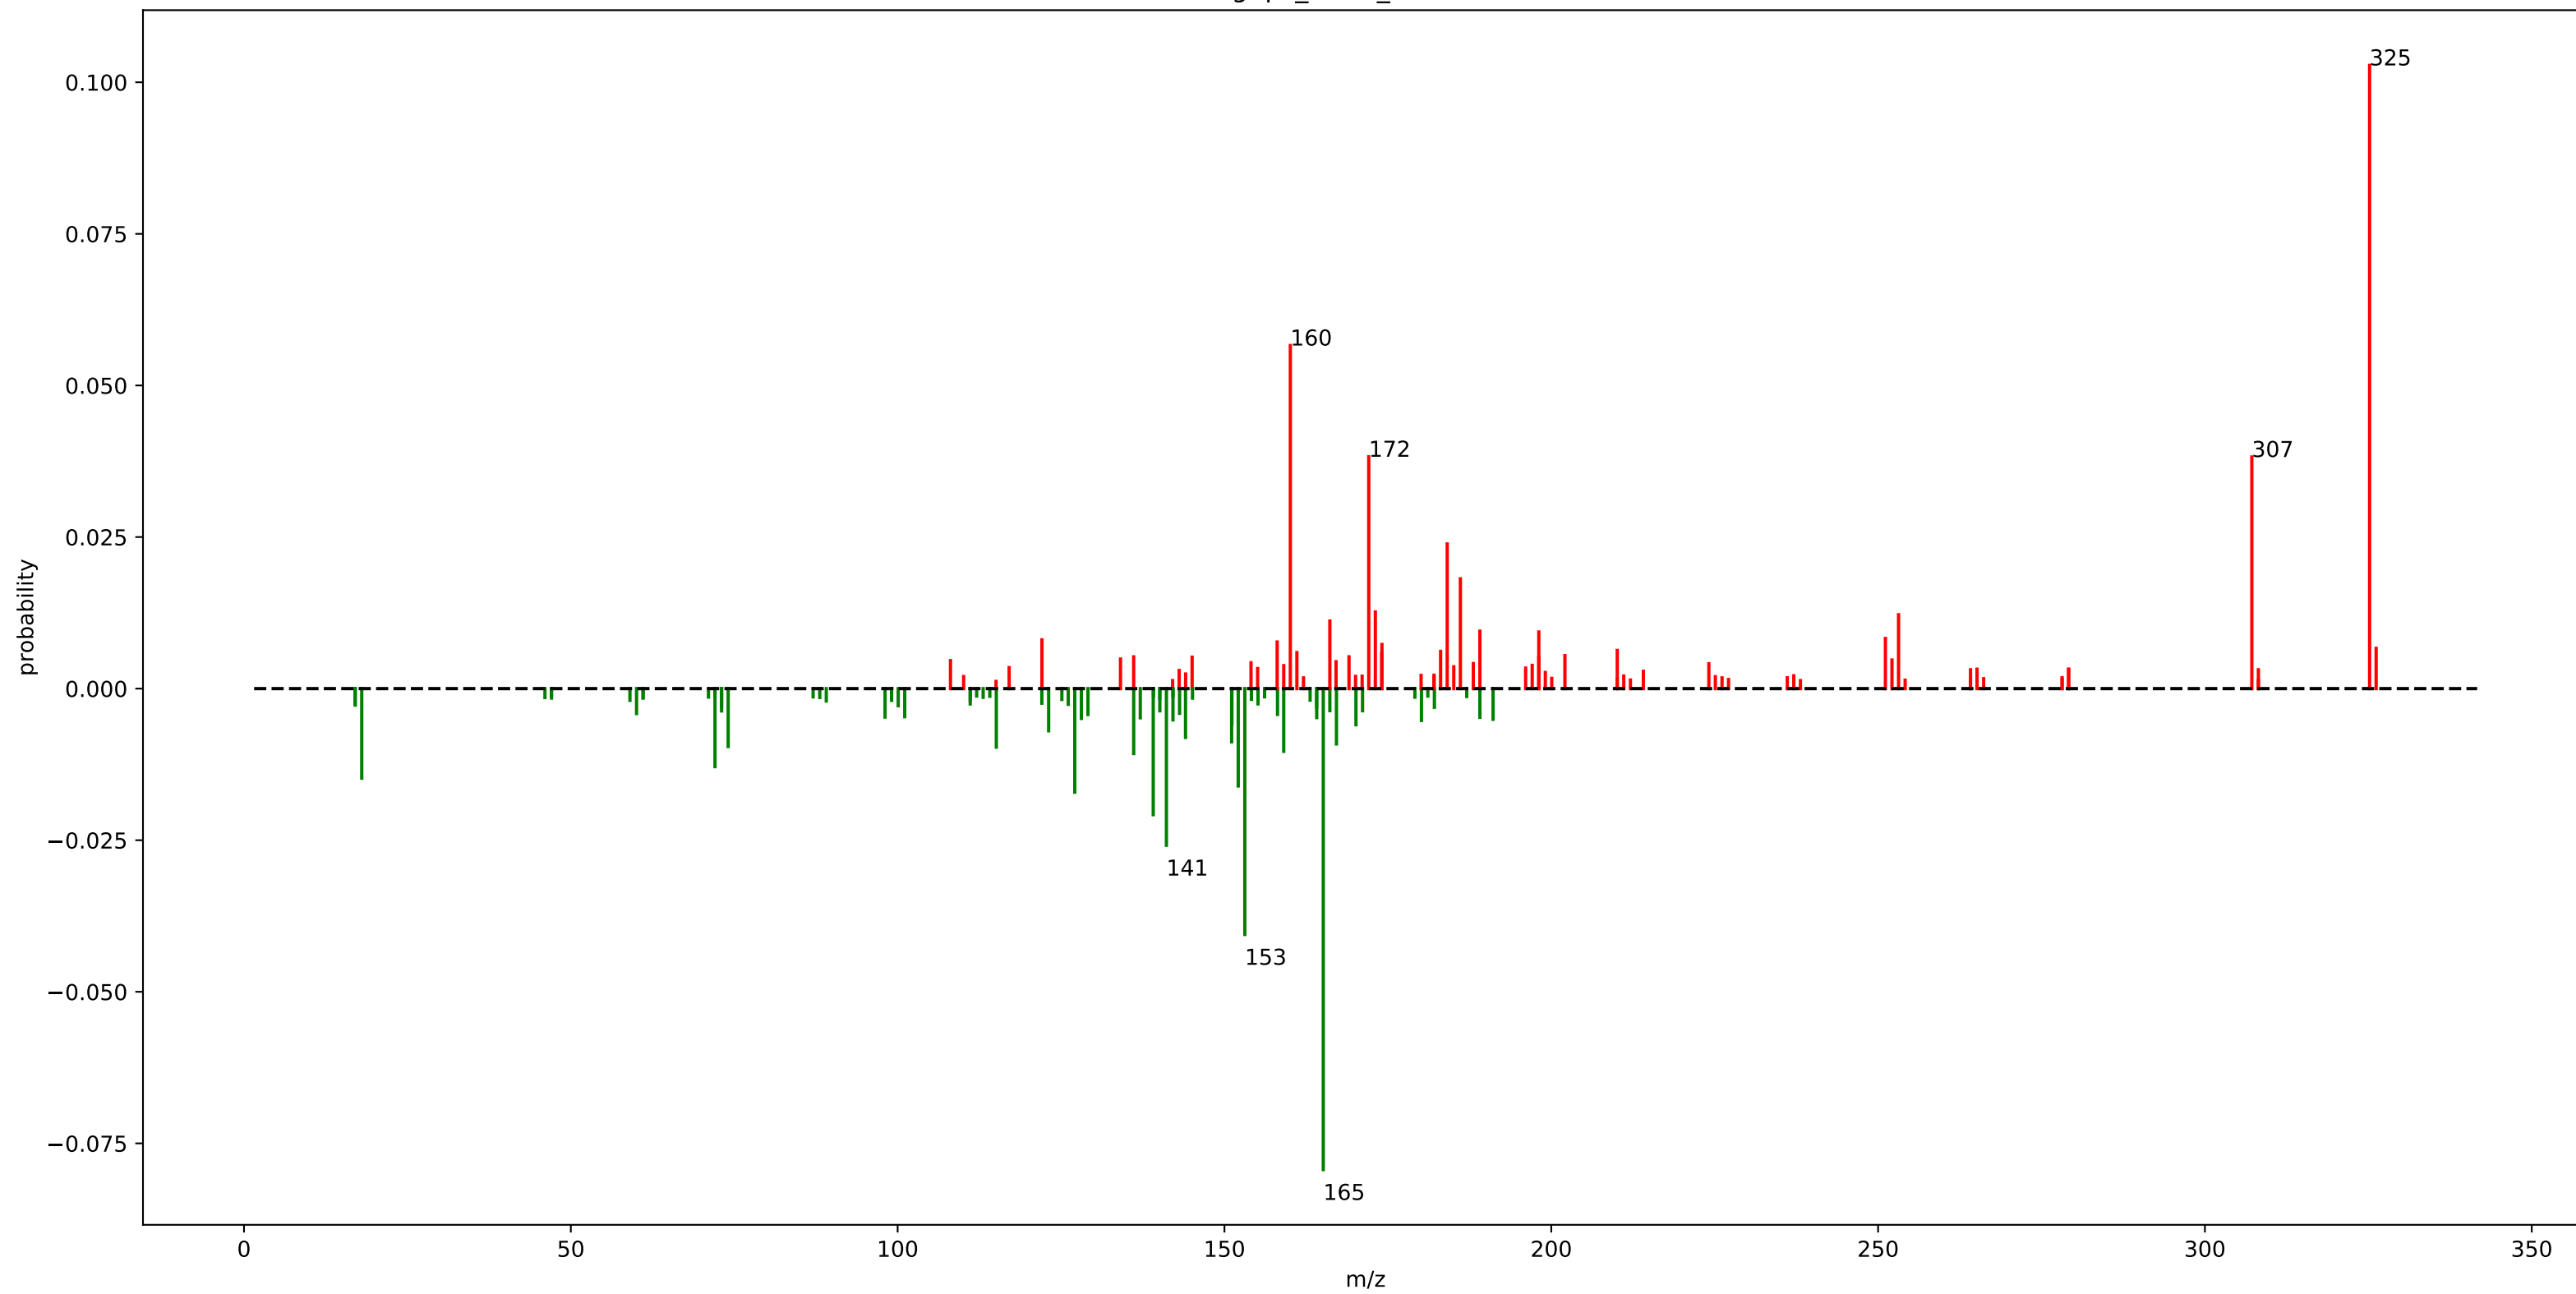

# gnps\_motif\_10.m2m

|                   |        |                   |        |                   |        |
|-------------------|--------|-------------------|--------|-------------------|--------|
| fragment_325.1925 | : 0.10 | loss_74.0725      | : 0.01 | fragment_169.0525 | : 0.01 |
| loss_165.1175     | : 0.08 | fragment_189.0775 | : 0.01 | fragment_136.1125 | : 0.01 |
| fragment_160.0775 | : 0.06 | fragment_198.0925 | : 0.01 | fragment_145.0525 | : 0.01 |
| loss_153.1175     | : 0.04 | loss_167.1325     | : 0.01 | loss_142.1225     | : 0.01 |
| fragment_172.0775 | : 0.04 | loss_151.0975     | : 0.01 | fragment_198.0875 | : 0.01 |
| fragment_307.1775 | : 0.04 | fragment_251.1175 | : 0.01 | loss_191.0925     | : 0.01 |
| loss_141.1175     | : 0.03 | fragment_122.0775 | : 0.01 |                   |        |
| fragment_184.0775 | : 0.02 | loss_144.0425     | : 0.01 |                   |        |
| loss_139.1025     | : 0.02 | fragment_158.0625 | : 0.01 |                   |        |
| fragment_186.0925 | : 0.02 | fragment_174.0925 | : 0.01 |                   |        |
| loss_127.0975     | : 0.02 | loss_123.1025     | : 0.01 |                   |        |
| loss_152.1075     | : 0.02 | fragment_326.1925 | : 0.01 |                   |        |
| loss_18.0125      | : 0.01 | fragment_210.0925 | : 0.01 |                   |        |
| loss_72.0575      | : 0.01 | fragment_183.0675 | : 0.01 |                   |        |
| fragment_173.0825 | : 0.01 | loss_170.1175     | : 0.01 |                   |        |
| fragment_253.1325 | : 0.01 | fragment_161.0825 | : 0.01 |                   |        |
| fragment_166.1225 | : 0.01 | fragment_174.0525 | : 0.01 |                   |        |
| loss_136.1125     | : 0.01 | loss_151.1375     | : 0.01 |                   |        |
| loss_159.0675     | : 0.01 | fragment_202.0875 | : 0.01 |                   |        |
| loss_115.0975     | : 0.01 | loss_180.1375     | : 0.01 |                   |        |

motif\_487

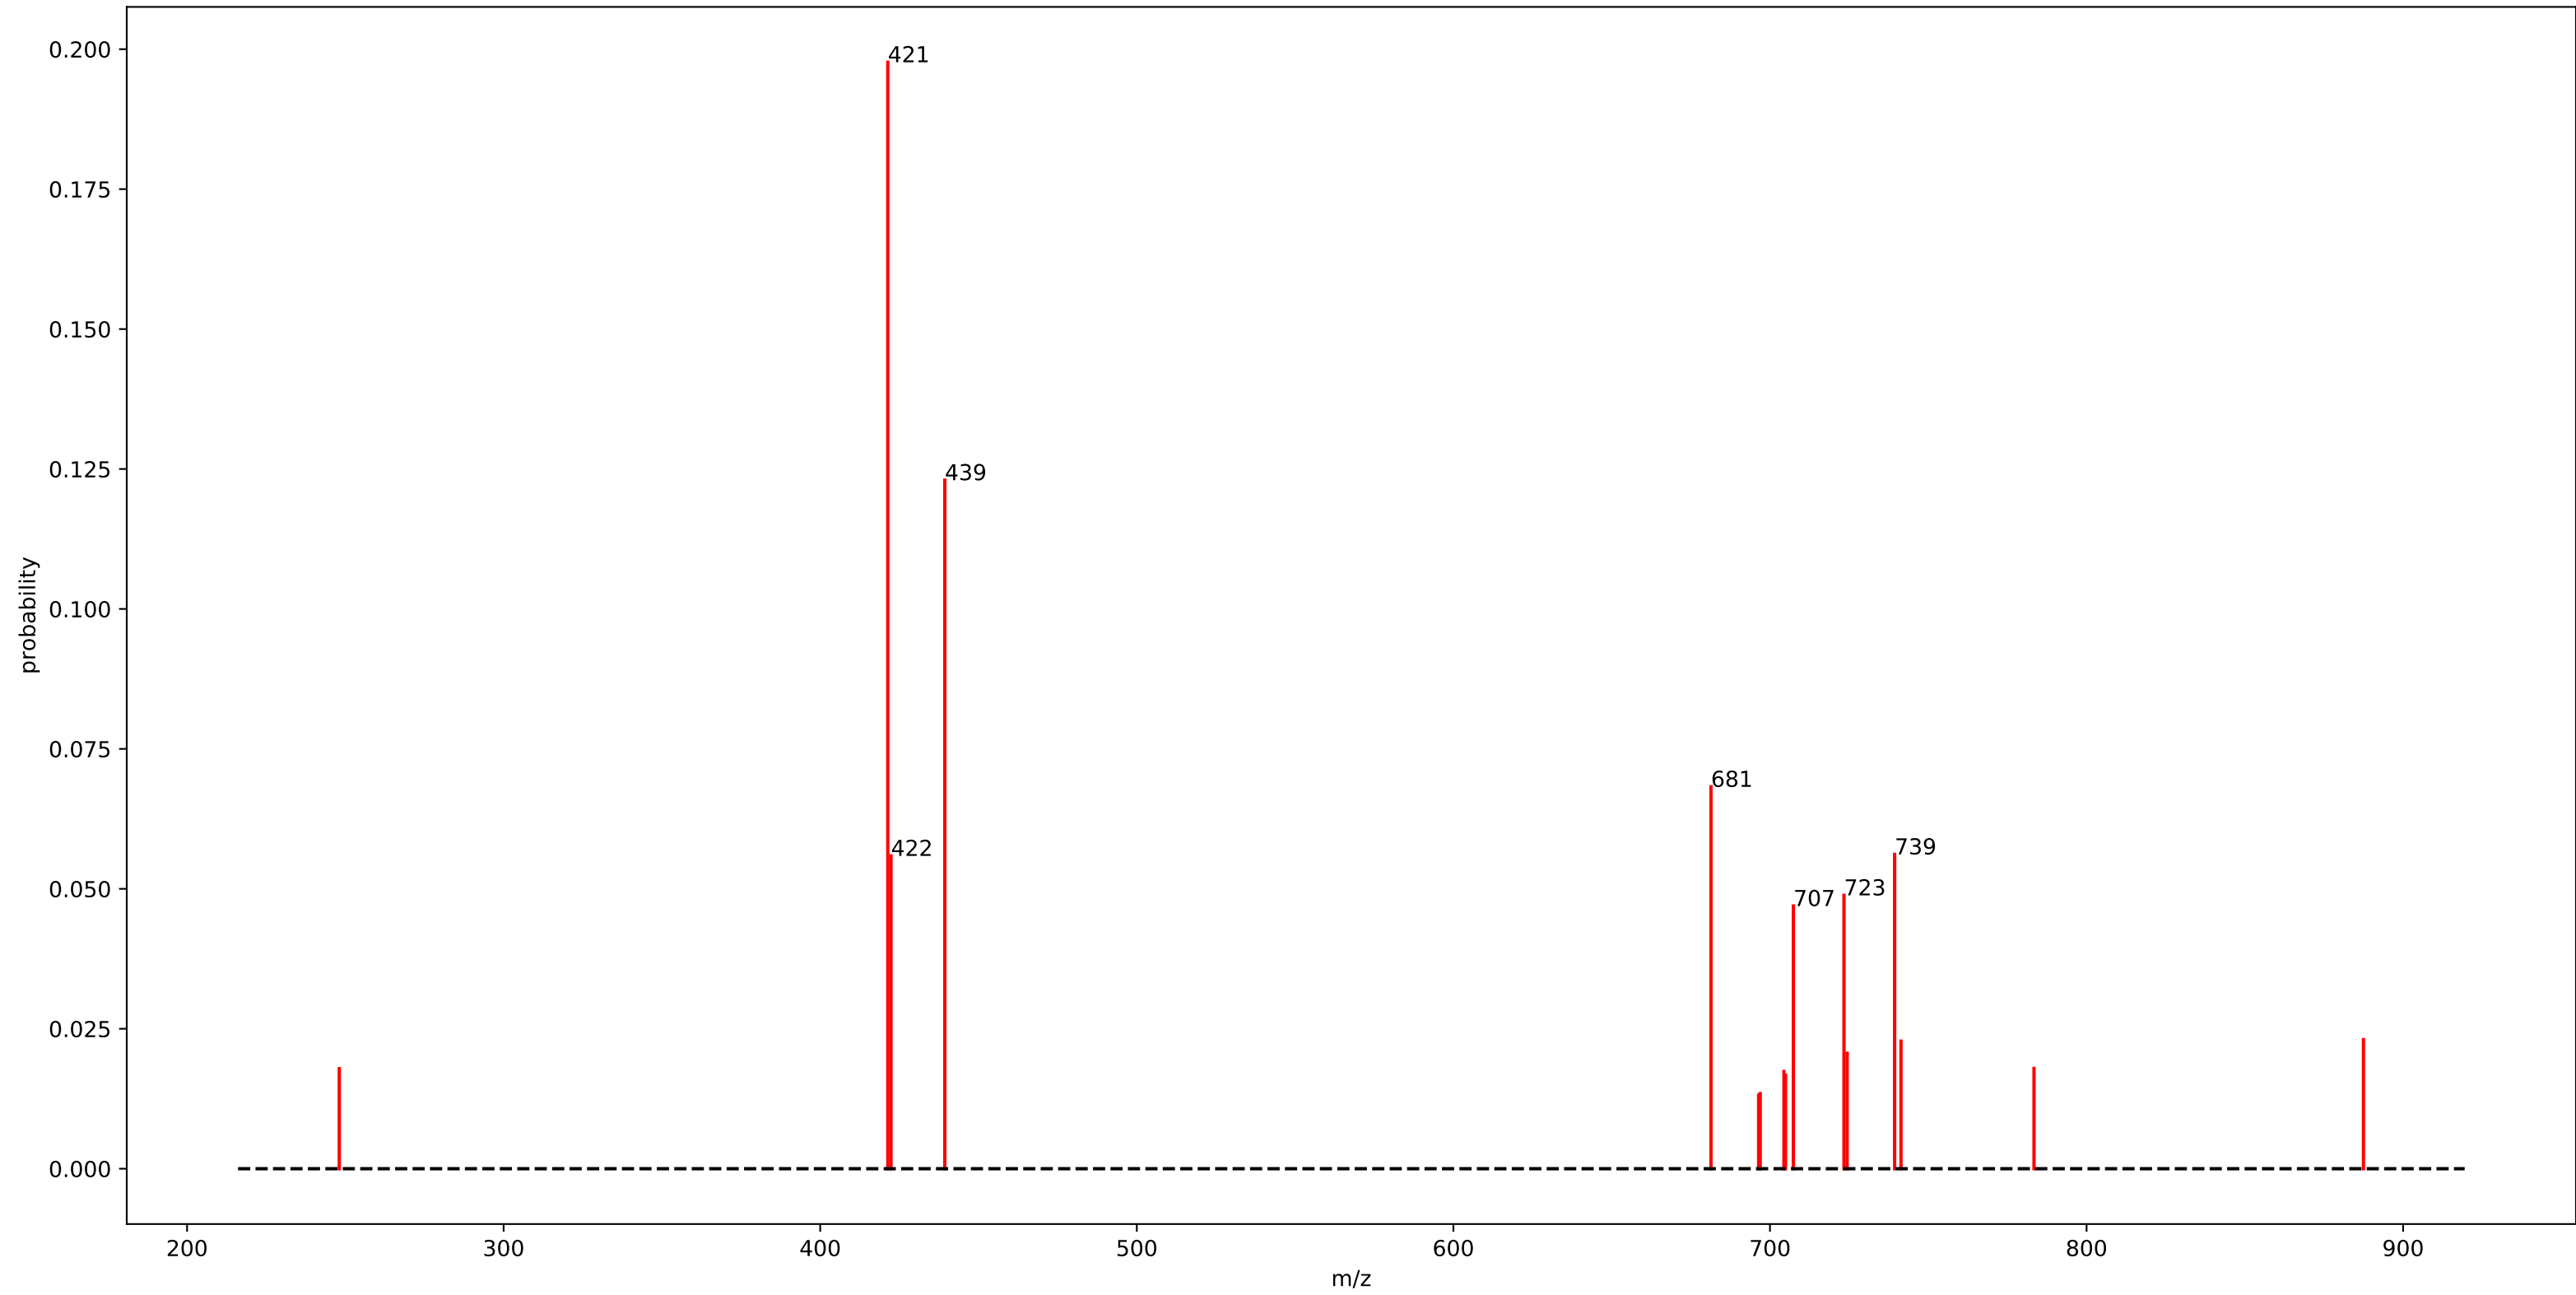

## motif\_487

|                   |        |
|-------------------|--------|
| fragment_421.3475 | : 0.20 |
| fragment_439.3575 | : 0.12 |
| fragment_681.3675 | : 0.07 |
| fragment_739.3775 | : 0.06 |
| fragment_422.3475 | : 0.06 |
| fragment_723.3775 | : 0.05 |
| fragment_707.4025 | : 0.05 |
| fragment_887.4675 | : 0.02 |
| fragment_741.3875 | : 0.02 |
| fragment_724.3825 | : 0.02 |
| fragment_783.4025 | : 0.02 |
| fragment_248.0825 | : 0.02 |
| fragment_704.4075 | : 0.02 |
| fragment_704.9075 | : 0.02 |
| fragment_696.9175 | : 0.01 |
| fragment_696.4175 | : 0.01 |

motif\_486

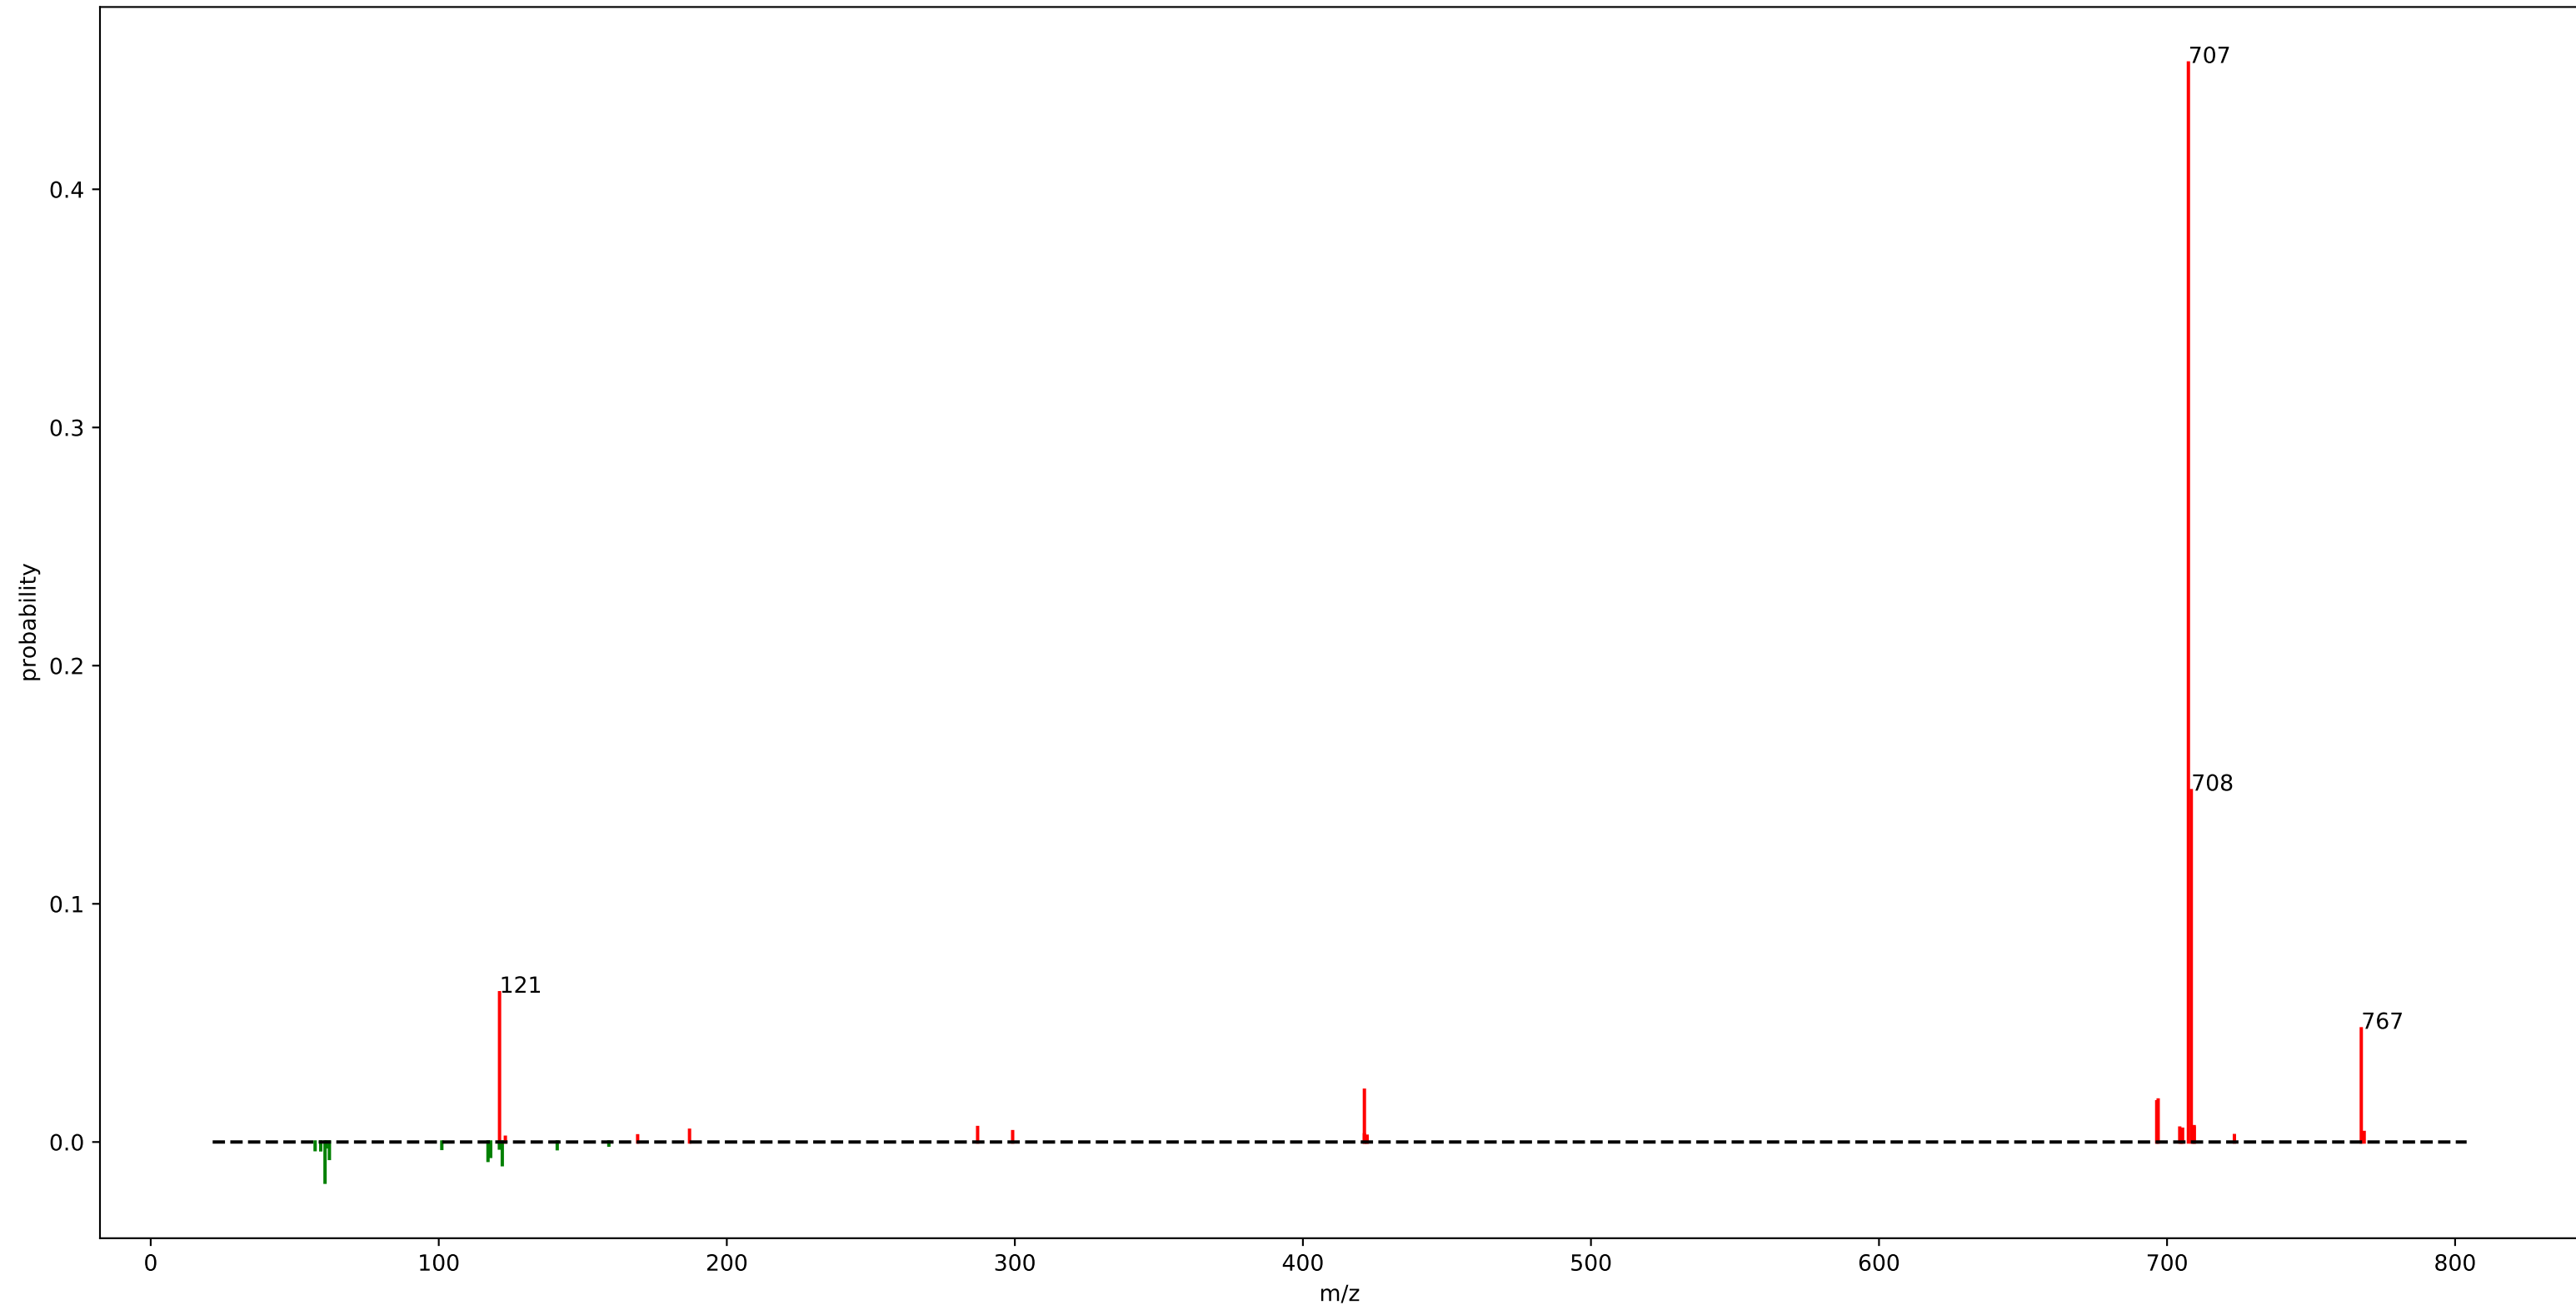

## motif\_486

|                   |        |
|-------------------|--------|
| fragment_707.4125 | : 0.45 |
| fragment_708.4175 | : 0.15 |
| fragment_121.1025 | : 0.06 |
| fragment_767.4325 | : 0.05 |
| fragment_421.3475 | : 0.02 |
| fragment_696.9175 | : 0.02 |
| loss_60.5175      | : 0.02 |
| fragment_696.4175 | : 0.02 |
| loss_122.0525     | : 0.01 |
| loss_117.0975     | : 0.01 |
| loss_62.0325      | : 0.01 |
| fragment_709.4225 | : 0.01 |
| fragment_287.0725 | : 0.01 |
| loss_118.0275     | : 0.01 |
| fragment_709.4175 | : 0.01 |
| fragment_704.4075 | : 0.01 |
| fragment_705.3975 | : 0.01 |

motif\_489

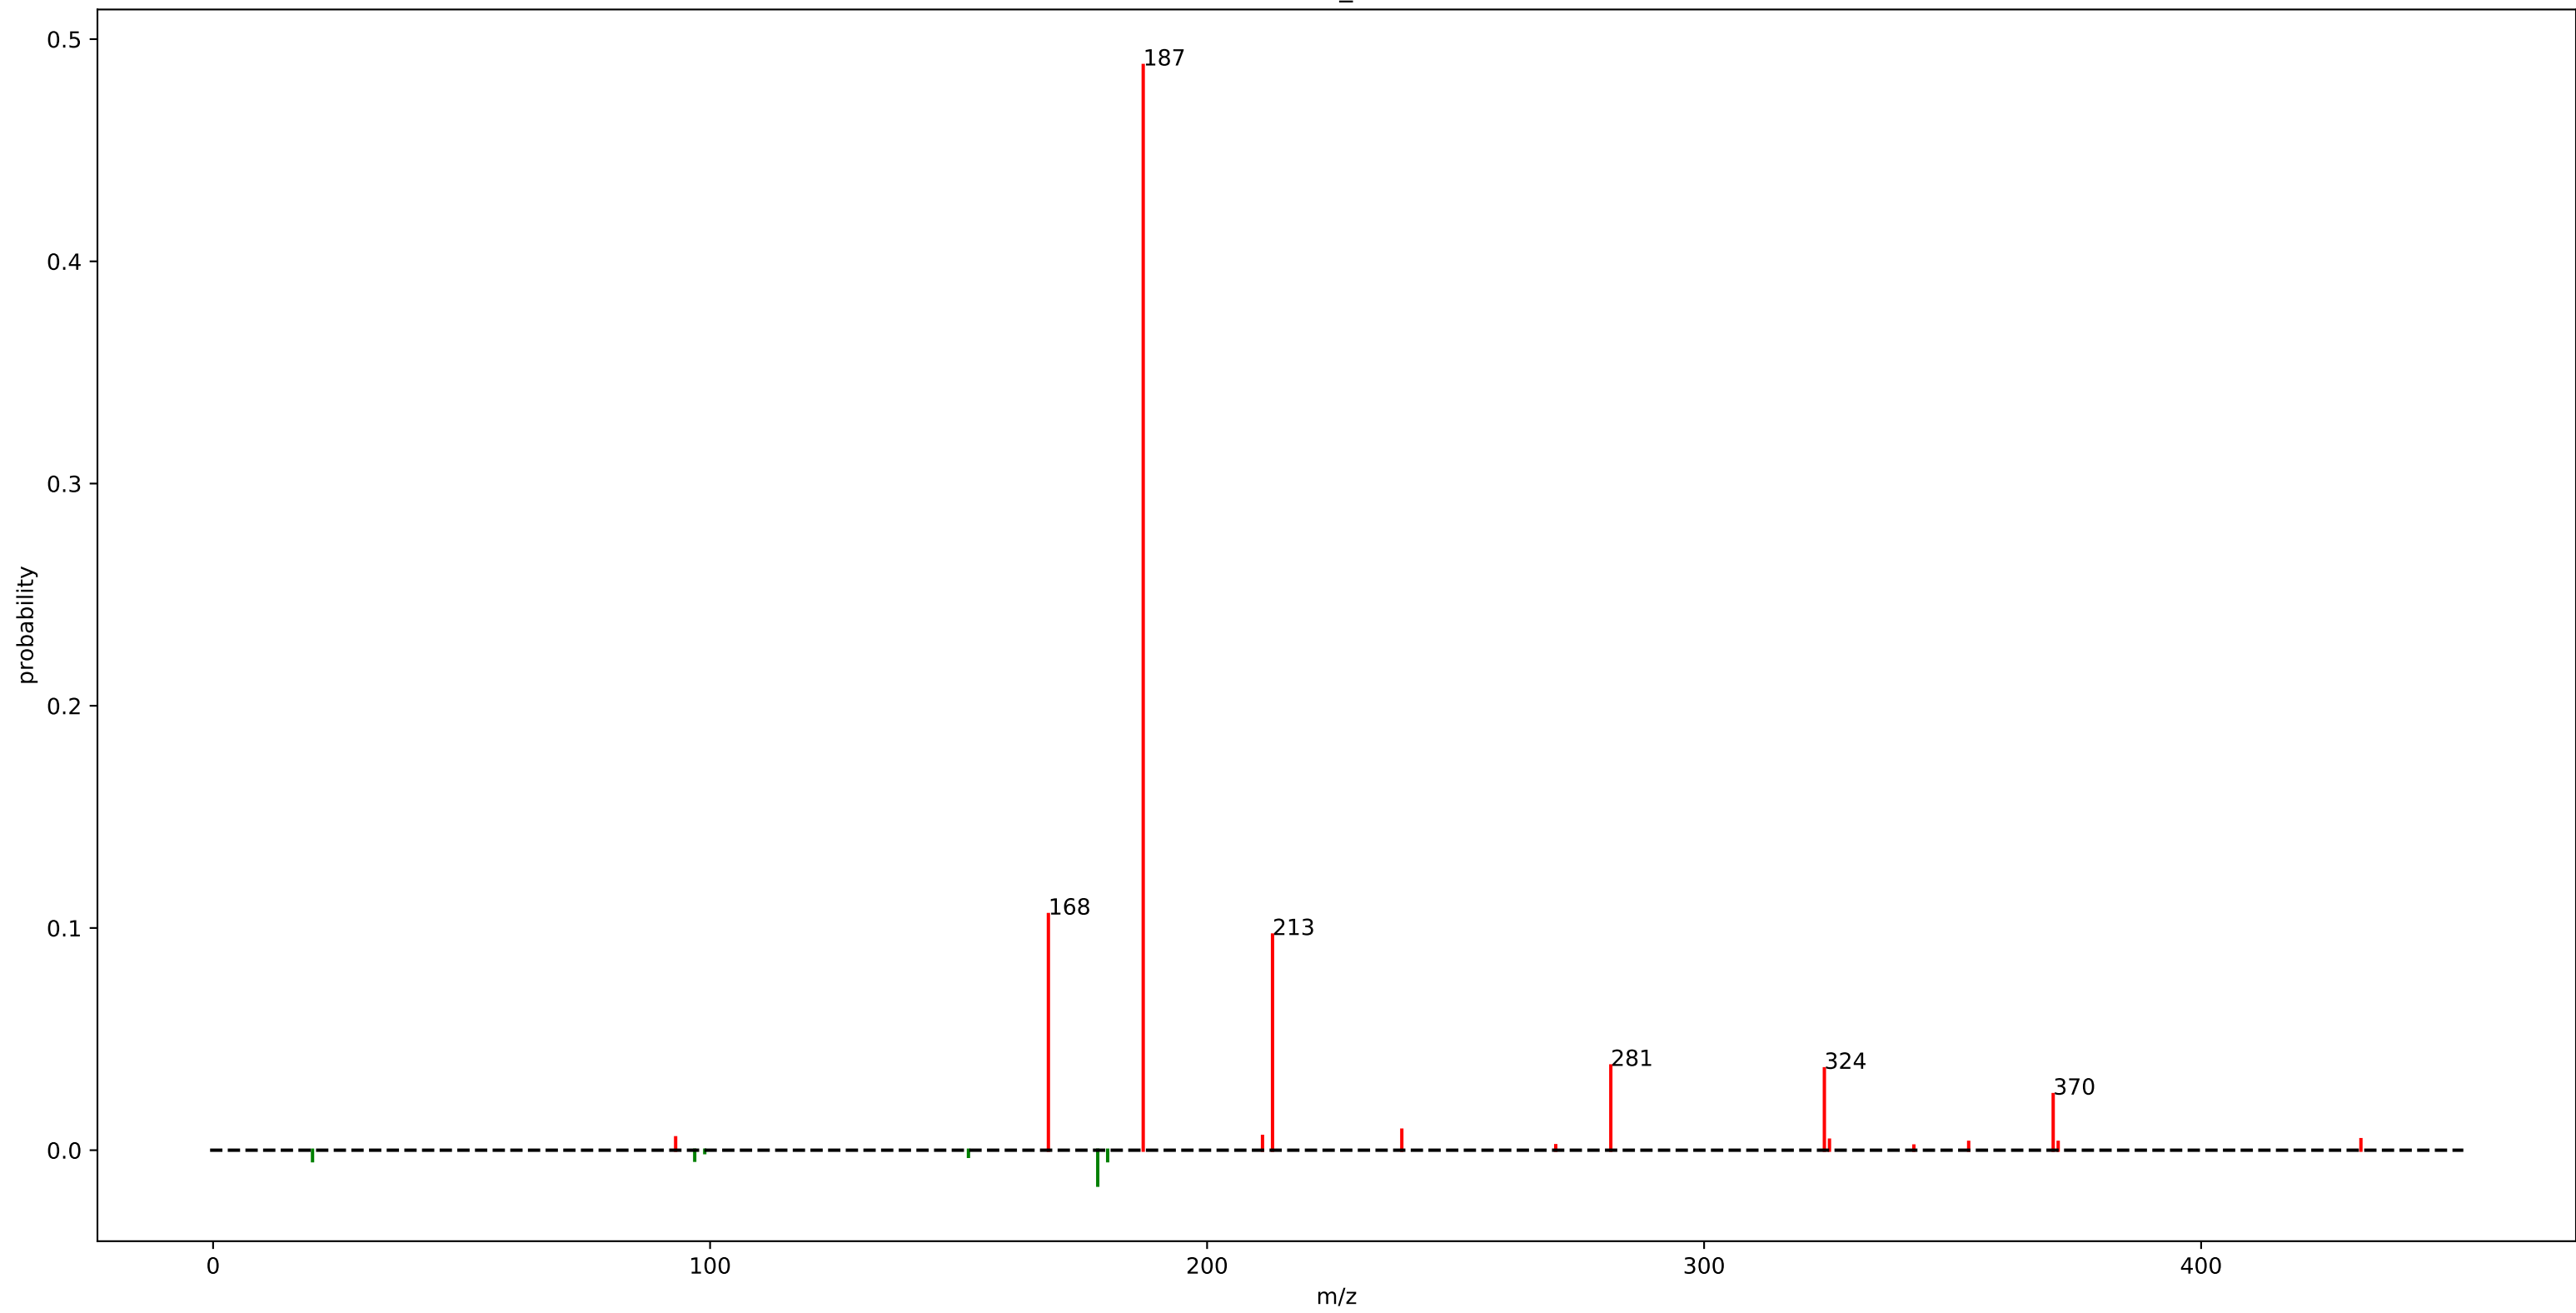

## motif\_489

|                   |        |
|-------------------|--------|
| fragment_187.1475 | : 0.49 |
| fragment_168.0675 | : 0.11 |
| fragment_213.1625 | : 0.10 |
| fragment_281.2275 | : 0.04 |
| fragment_324.1975 | : 0.04 |
| fragment_370.2375 | : 0.03 |
| loss_177.9975     | : 0.02 |
| fragment_239.1775 | : 0.01 |
| fragment_211.1475 | : 0.01 |
| fragment_93.0675  | : 0.01 |



motif\_488

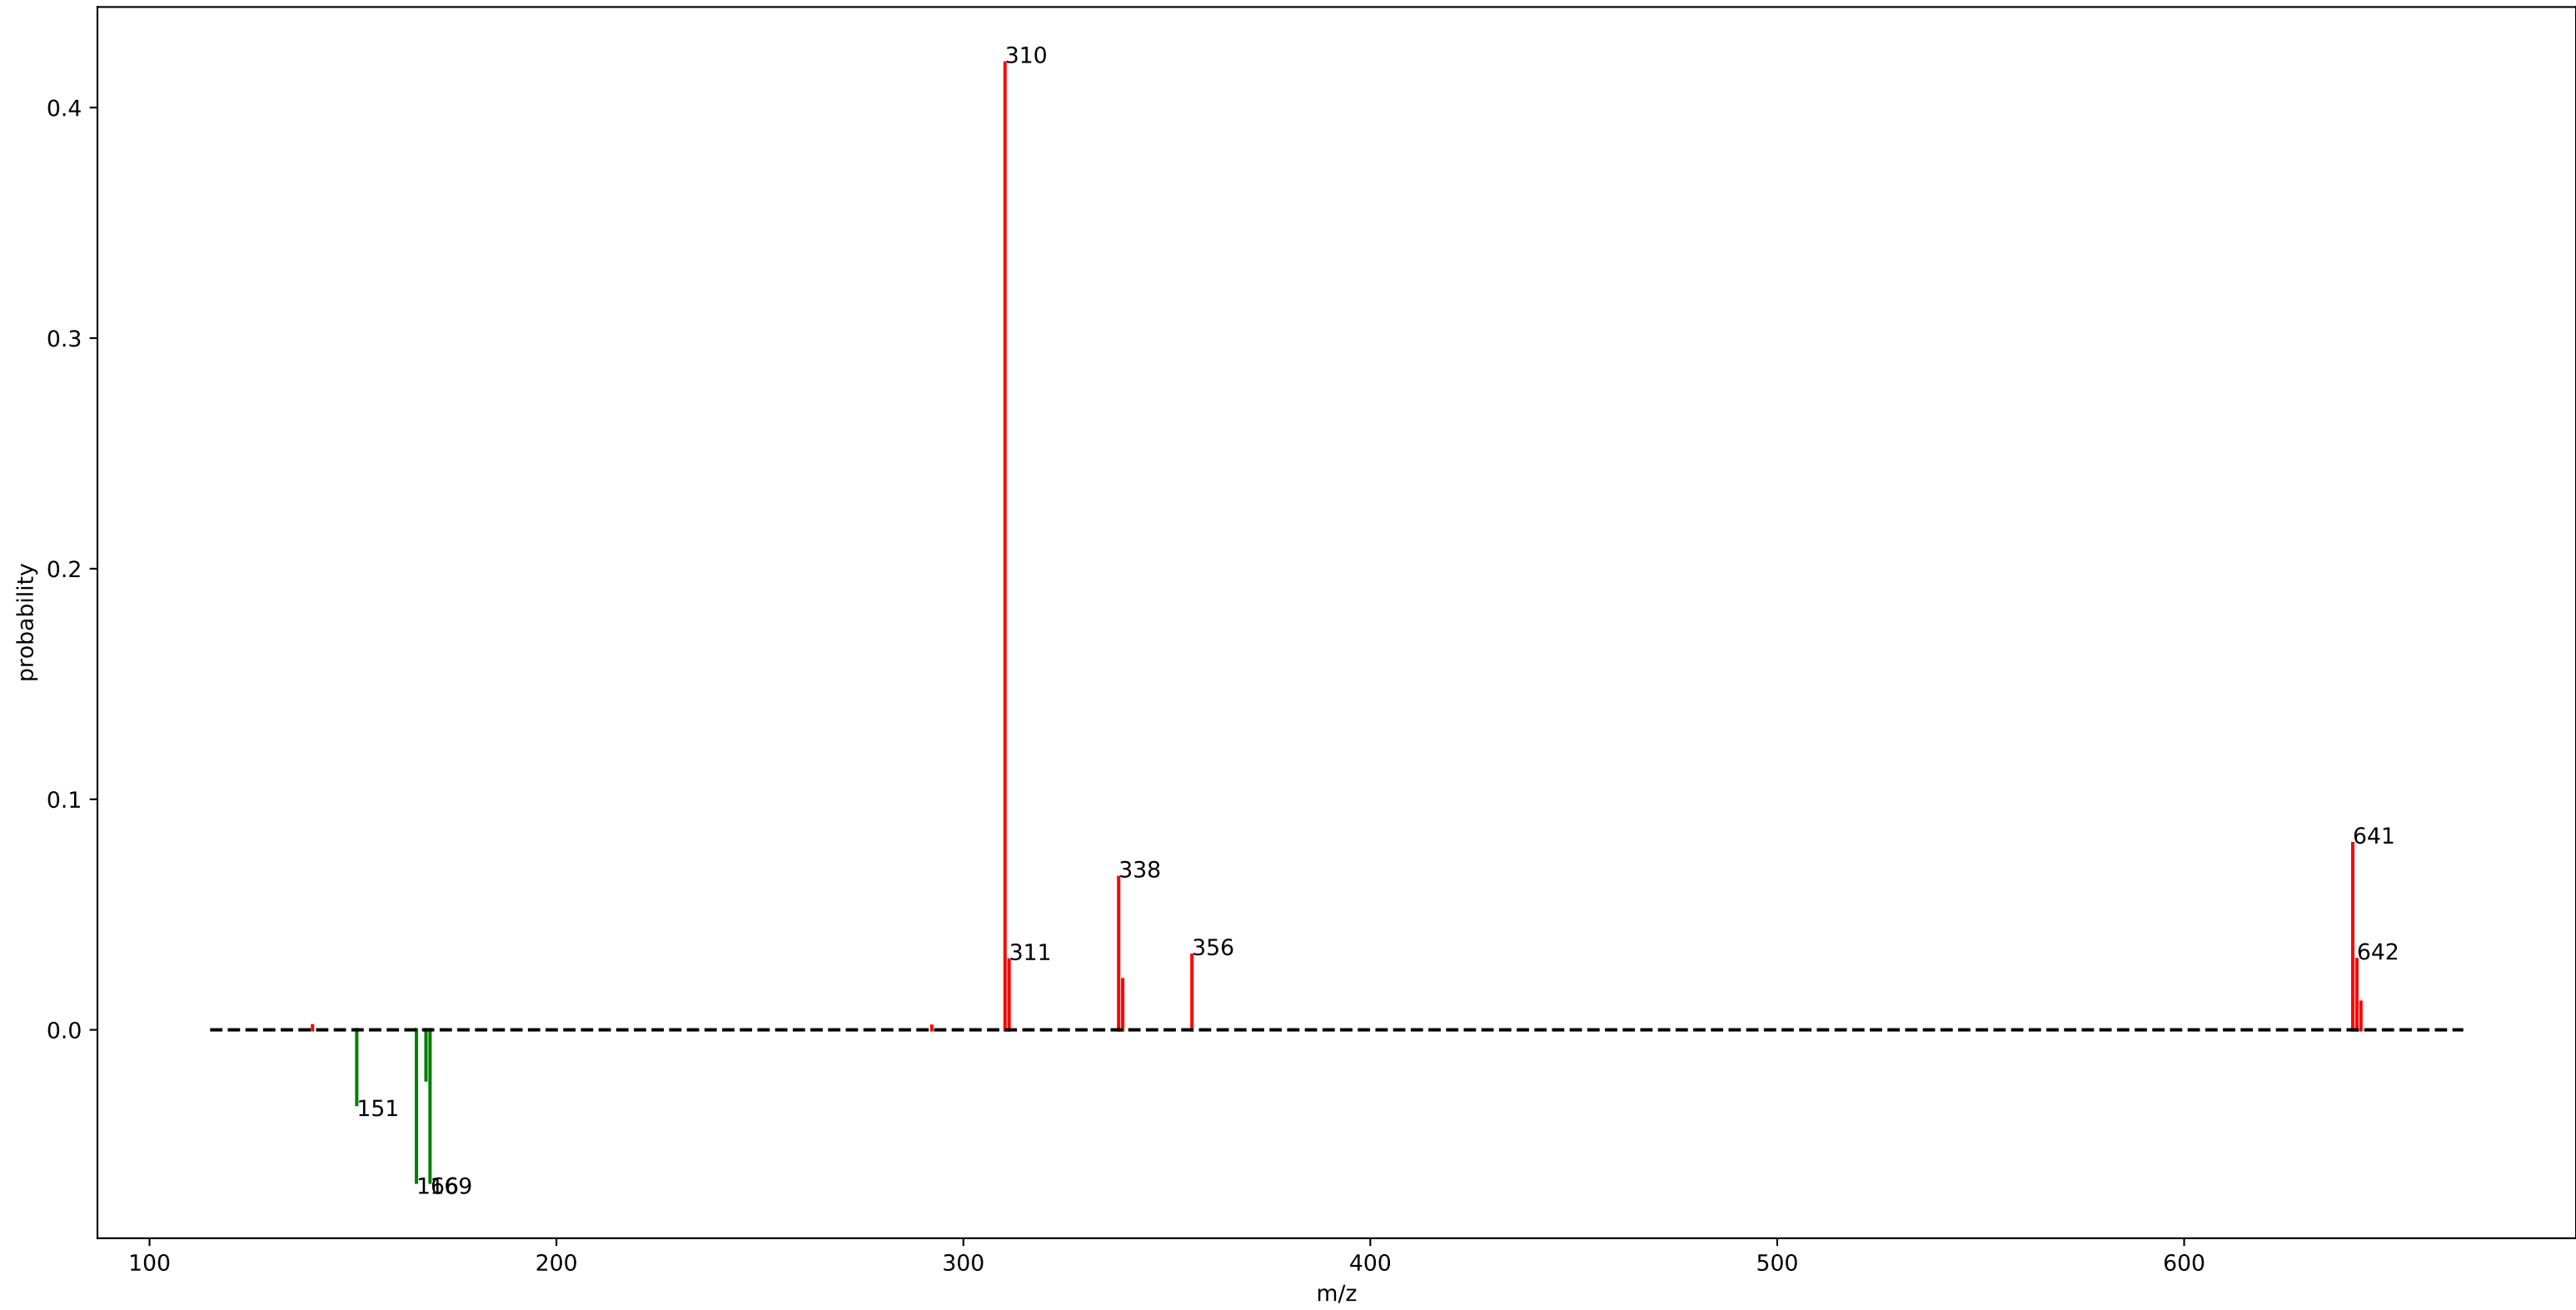

## motif\_488

|                   |        |
|-------------------|--------|
| fragment_310.2375 | : 0.42 |
| fragment_641.4375 | : 0.08 |
| fragment_338.1625 | : 0.07 |
| loss_165.5975     | : 0.07 |
| loss_168.9375     | : 0.07 |
| loss_150.9275     | : 0.03 |
| fragment_356.1725 | : 0.03 |
| fragment_642.4375 | : 0.03 |
| fragment_311.2375 | : 0.03 |
| fragment_339.1625 | : 0.02 |
| loss_167.9375     | : 0.02 |
| fragment_643.4375 | : 0.01 |

rhabdus\_motif\_140.m2m

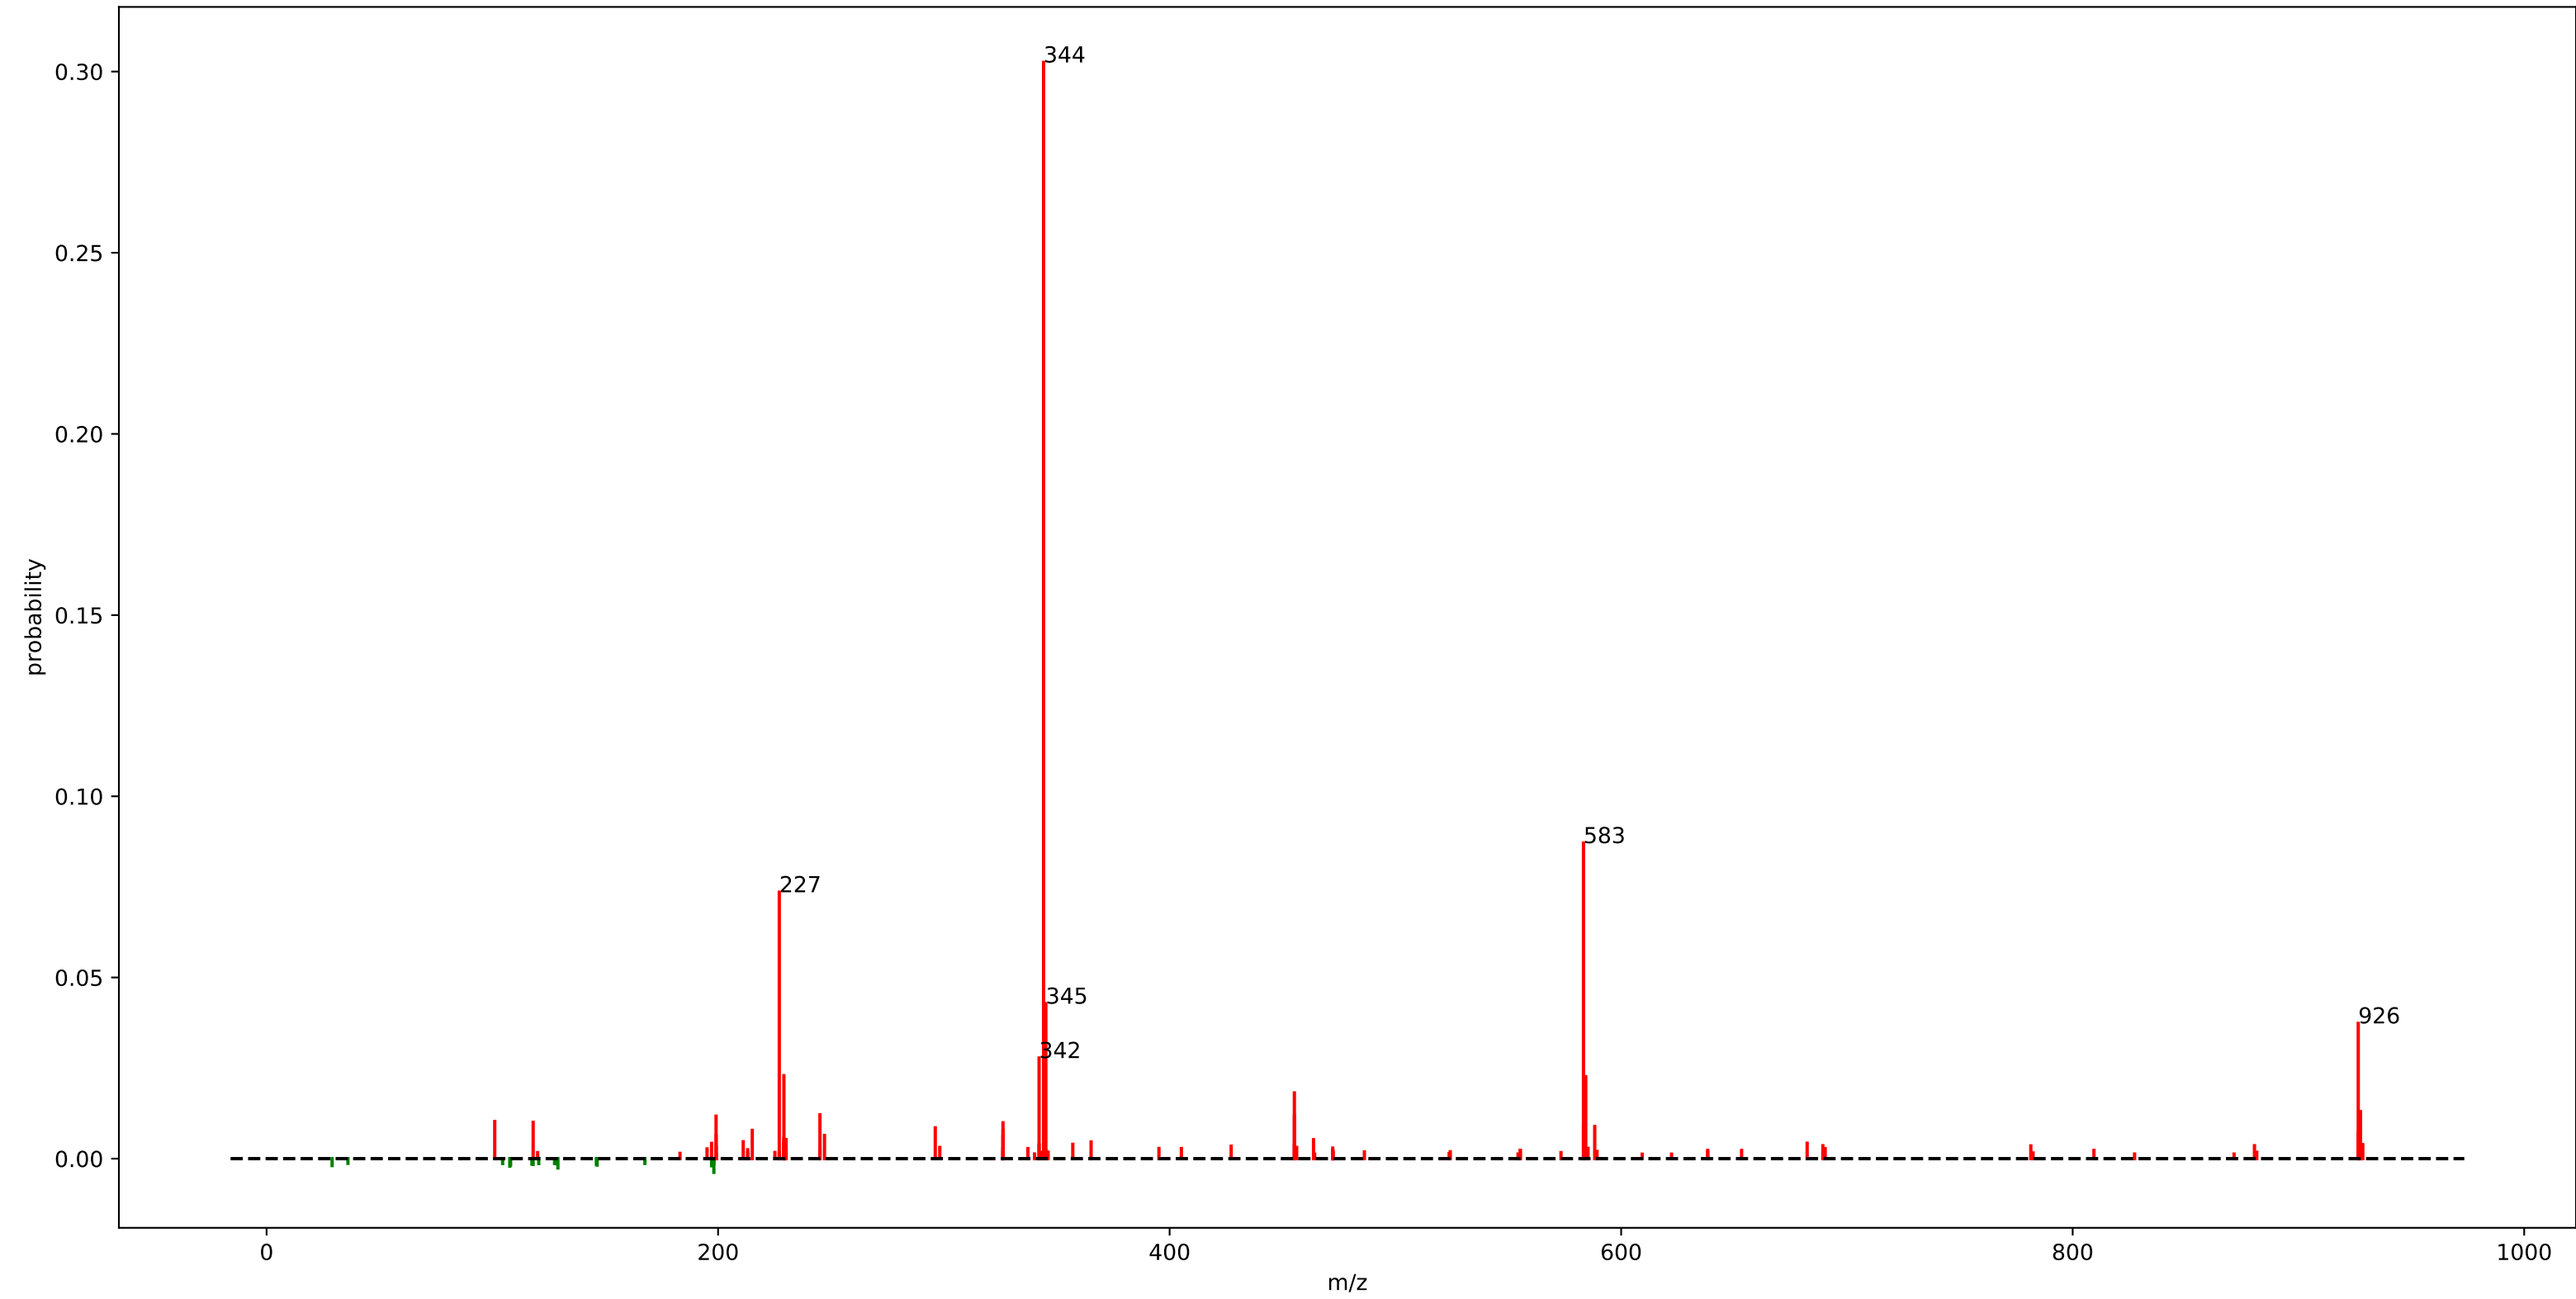

## rhabdus\_motif\_140.m2m

|                   |        |                   |        |
|-------------------|--------|-------------------|--------|
| fragment_344.1825 | : 0.30 | fragment_927.5025 | : 0.01 |
| fragment_583.3225 | : 0.09 | fragment_326.2025 | : 0.01 |
| fragment_227.1025 | : 0.07 | fragment_926.4925 | : 0.01 |
| fragment_345.1825 | : 0.04 | fragment_247.1275 | : 0.01 |
| fragment_926.4975 | : 0.04 | fragment_199.1125 | : 0.01 |
| fragment_342.1825 | : 0.03 | fragment_326.1925 | : 0.01 |
| fragment_229.1475 | : 0.02 | fragment_229.1375 | : 0.01 |
| fragment_584.3275 | : 0.02 | fragment_230.1175 | : 0.01 |
| fragment_455.2625 | : 0.02 | fragment_463.7525 | : 0.01 |
| fragment_927.4975 | : 0.01 |                   |        |
| fragment_245.1175 | : 0.01 |                   |        |
| fragment_455.2675 | : 0.01 |                   |        |
| fragment_199.1075 | : 0.01 |                   |        |
| fragment_101.0675 | : 0.01 |                   |        |
| fragment_118.0825 | : 0.01 |                   |        |
| fragment_326.1975 | : 0.01 |                   |        |
| fragment_583.3275 | : 0.01 |                   |        |
| fragment_588.3025 | : 0.01 |                   |        |
| fragment_296.1975 | : 0.01 |                   |        |
| fragment_215.1375 | : 0.01 |                   |        |

rhamn\_motif\_165.m2m

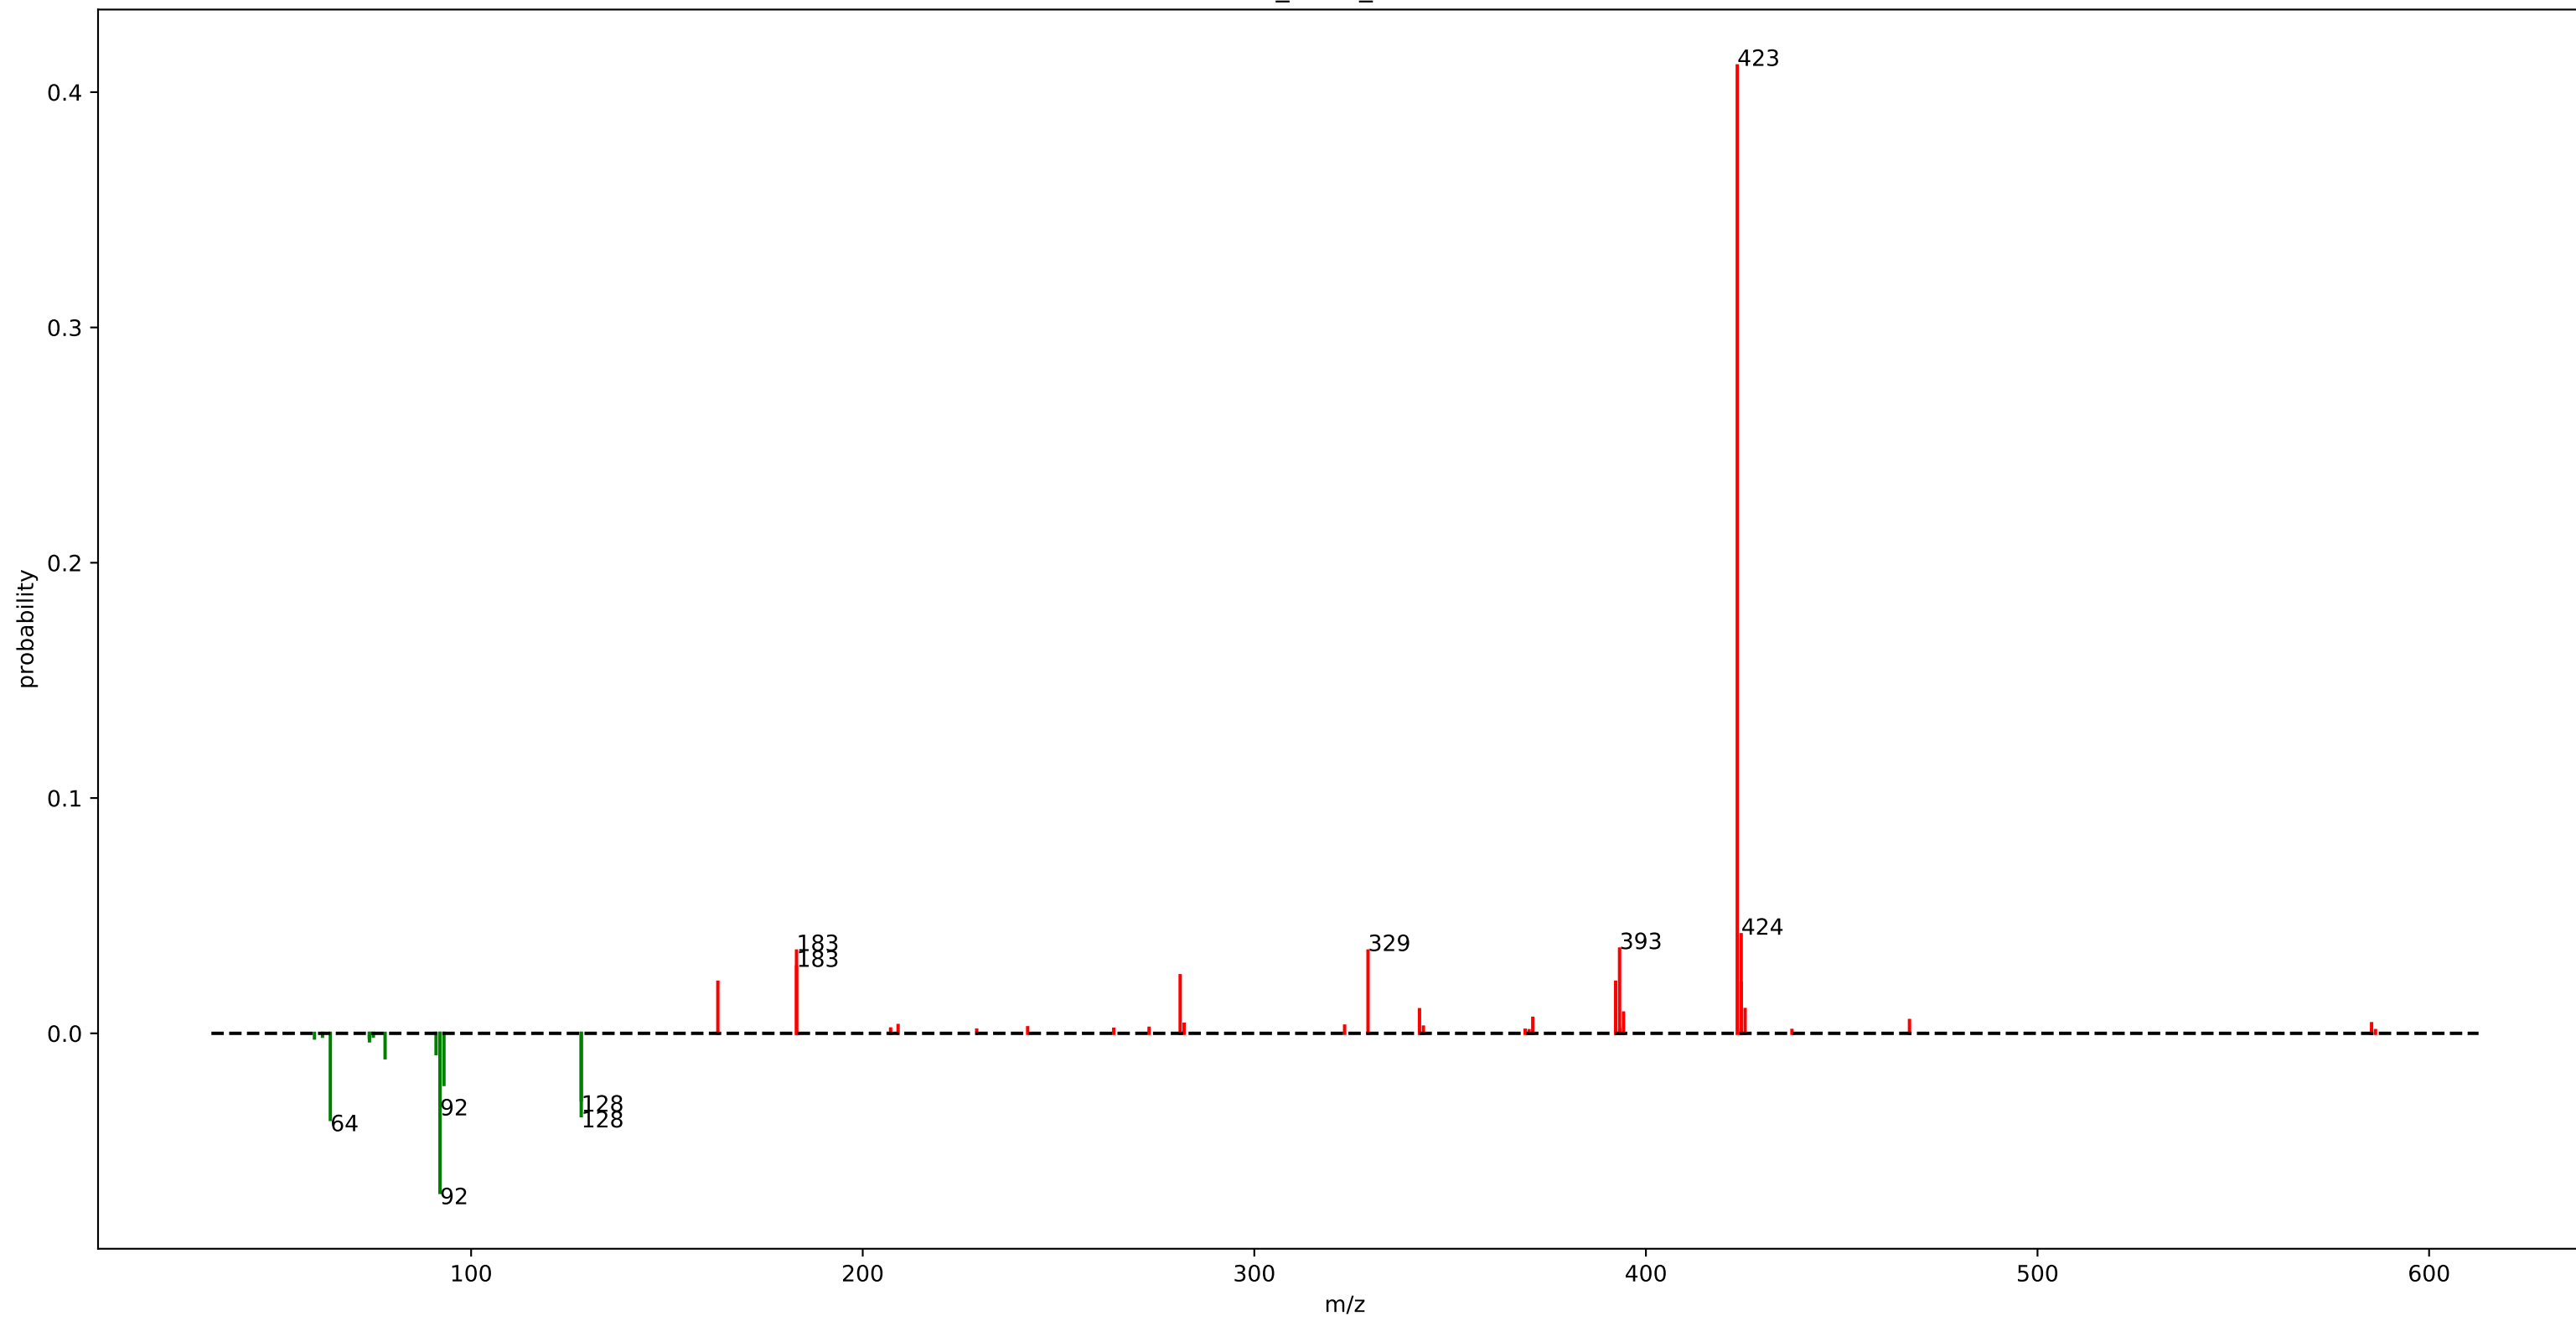

## rhamn\_motif\_165.m2m

|                   |        |                   |        |
|-------------------|--------|-------------------|--------|
| fragment_423.3275 | : 0.41 | fragment_394.2825 | : 0.01 |
| loss_92.0475      | : 0.07 | fragment_371.1025 | : 0.01 |
| fragment_424.3275 | : 0.04 | fragment_467.3125 | : 0.01 |
| loss_64.0475      | : 0.04 |                   |        |
| fragment_393.2775 | : 0.04 |                   |        |
| fragment_329.0375 | : 0.03 |                   |        |
| fragment_183.0975 | : 0.03 |                   |        |
| loss_128.1225     | : 0.03 |                   |        |
| loss_92.0425      | : 0.03 |                   |        |
| fragment_183.1075 | : 0.03 |                   |        |
| loss_128.1175     | : 0.03 |                   |        |
| fragment_281.0675 | : 0.02 |                   |        |
| fragment_392.2675 | : 0.02 |                   |        |
| loss_93.0575      | : 0.02 |                   |        |
| fragment_163.0075 | : 0.02 |                   |        |
| fragment_424.3375 | : 0.02 |                   |        |
| loss_78.0325      | : 0.01 |                   |        |
| fragment_425.3325 | : 0.01 |                   |        |
| fragment_342.1825 | : 0.01 |                   |        |
| loss_91.0475      | : 0.01 |                   |        |

urine\_mass2motif\_175.m2m

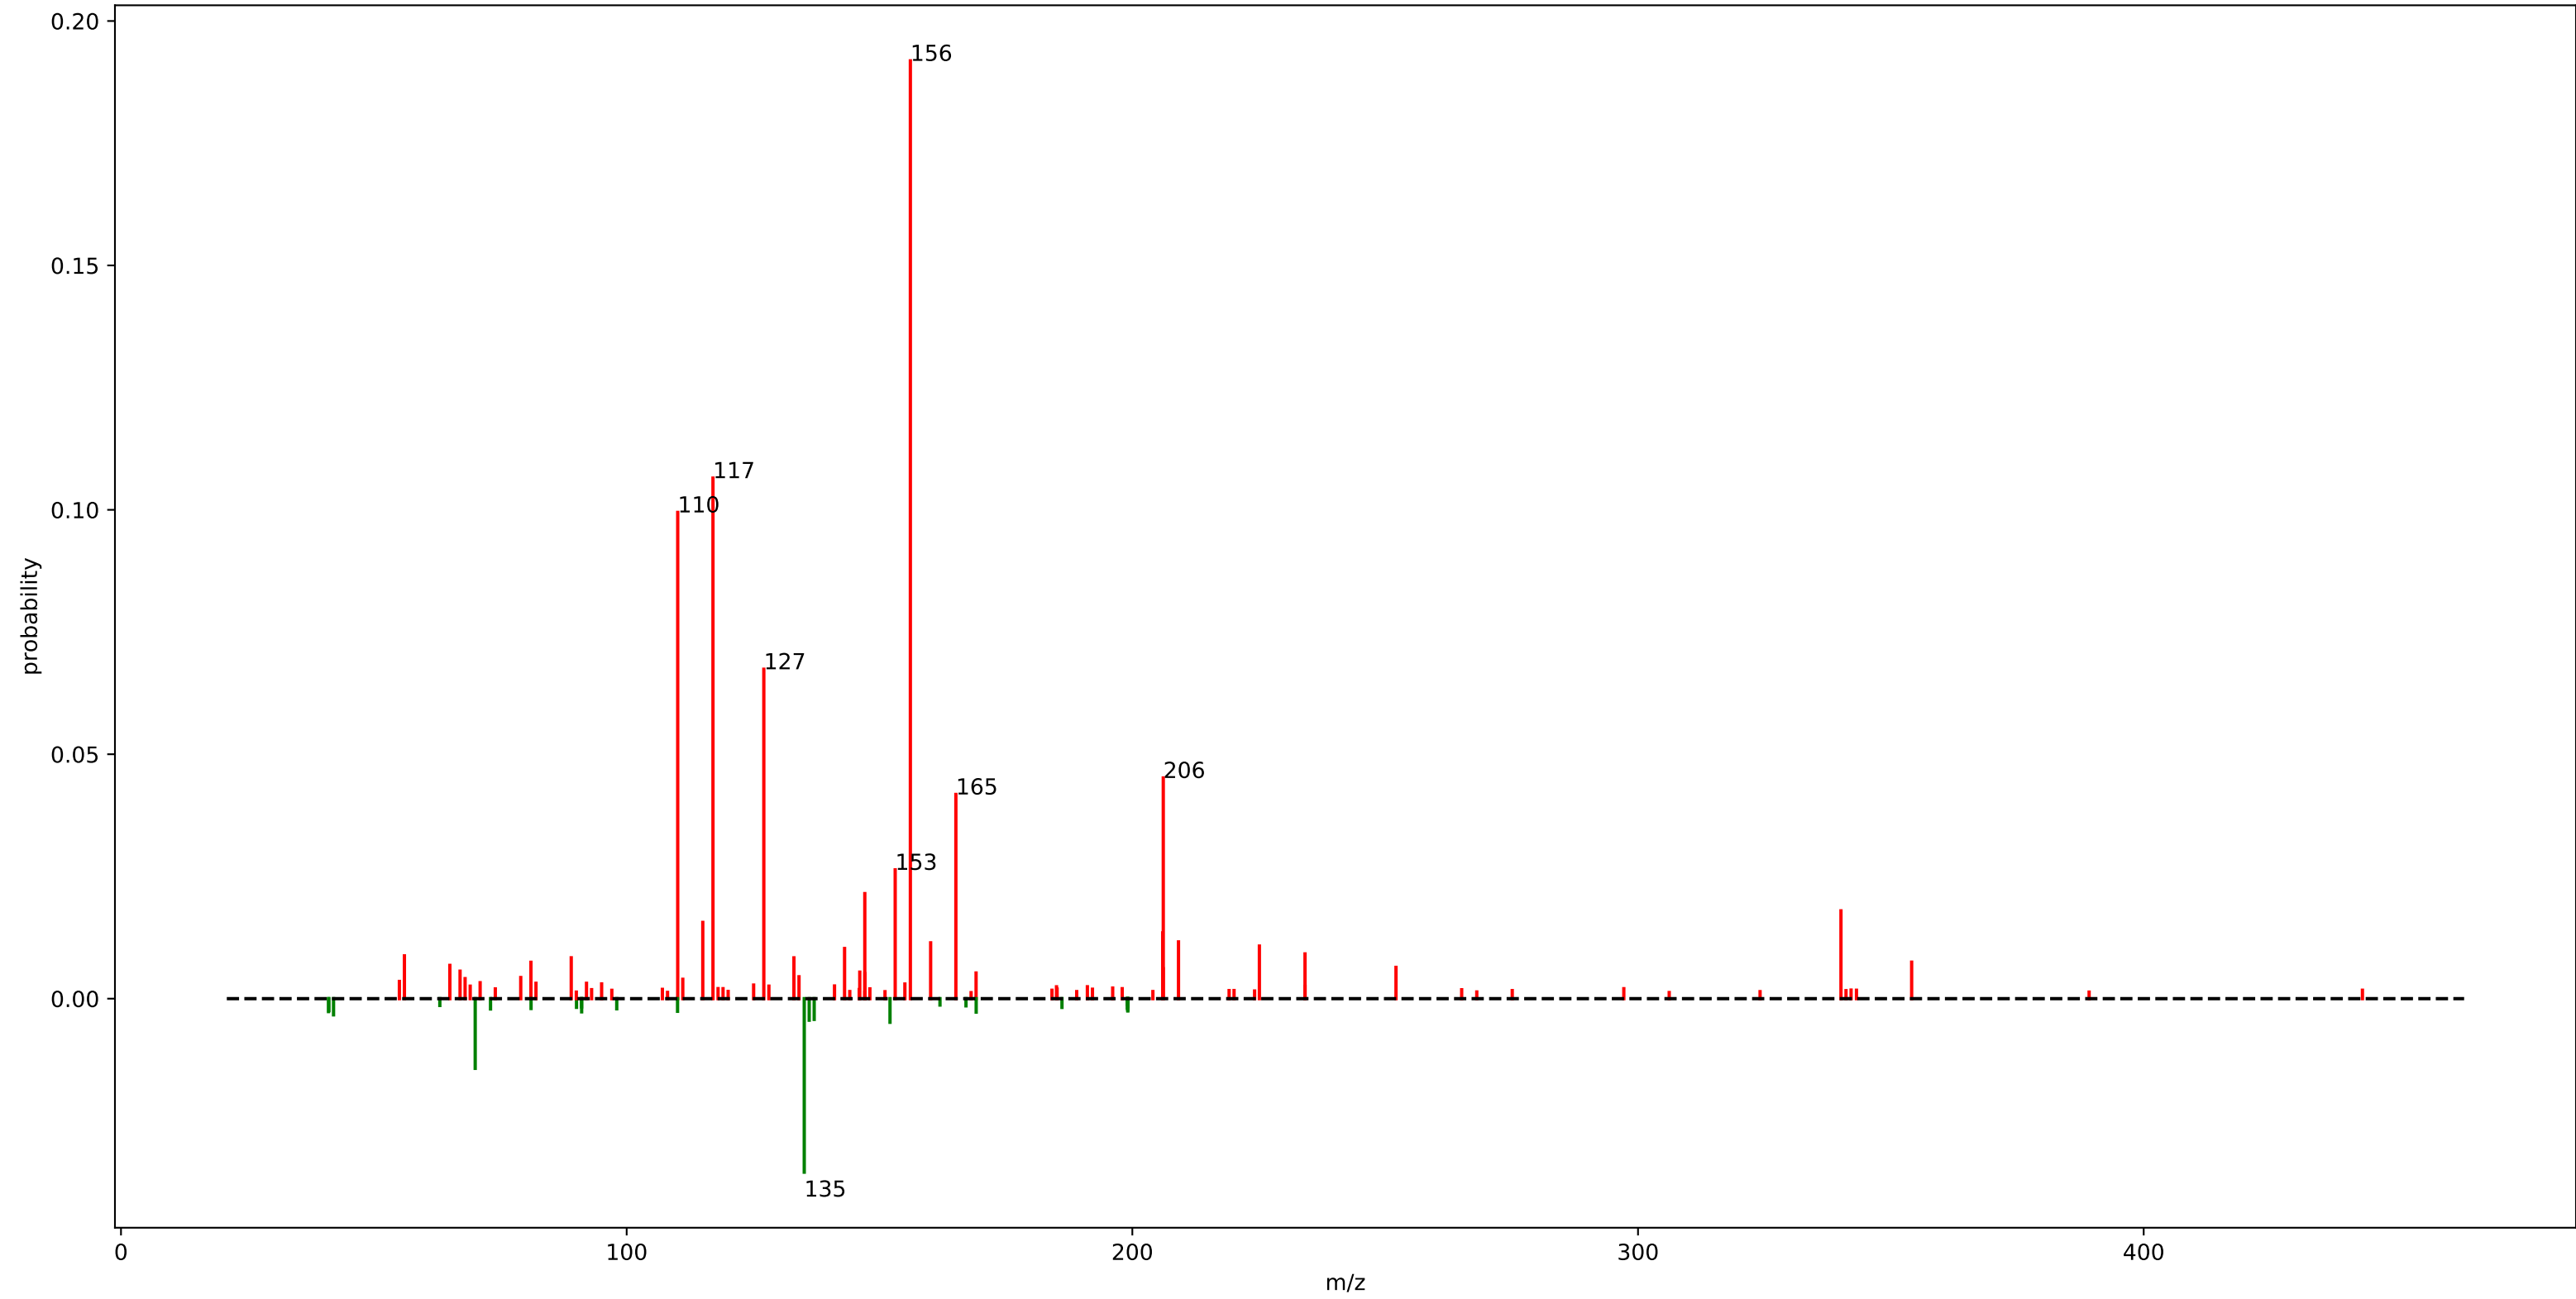

# urine\_mass2motif\_175.m2m

|                   |        |                   |        |
|-------------------|--------|-------------------|--------|
| fragment_156.1025 | : 0.19 | fragment_133.0775 | : 0.01 |
| fragment_117.0675 | : 0.11 | fragment_354.1125 | : 0.01 |
| fragment_110.0975 | : 0.10 | fragment_81.0675  | : 0.01 |
| fragment_127.1225 | : 0.07 | fragment_65.0375  | : 0.01 |
| fragment_206.1175 | : 0.05 | fragment_252.1375 | : 0.01 |
| fragment_165.1025 | : 0.04 | fragment_206.1125 | : 0.01 |
| loss_135.1175     | : 0.04 | fragment_67.0525  | : 0.01 |
| fragment_153.1025 | : 0.03 | fragment_146.0975 | : 0.01 |
| fragment_147.0925 | : 0.02 | fragment_169.0975 | : 0.01 |
| fragment_340.1325 | : 0.02 | fragment_147.1125 | : 0.01 |
| fragment_115.0525 | : 0.02 |                   |        |
| loss_70.0475      | : 0.01 |                   |        |
| fragment_206.0025 | : 0.01 |                   |        |
| fragment_209.1275 | : 0.01 |                   |        |
| fragment_160.1125 | : 0.01 |                   |        |
| fragment_225.1225 | : 0.01 |                   |        |
| fragment_143.0925 | : 0.01 |                   |        |
| fragment_234.1475 | : 0.01 |                   |        |
| fragment_56.0475  | : 0.01 |                   |        |
| fragment_89.0375  | : 0.01 |                   |        |



urine\_mass2motif\_115.m2m

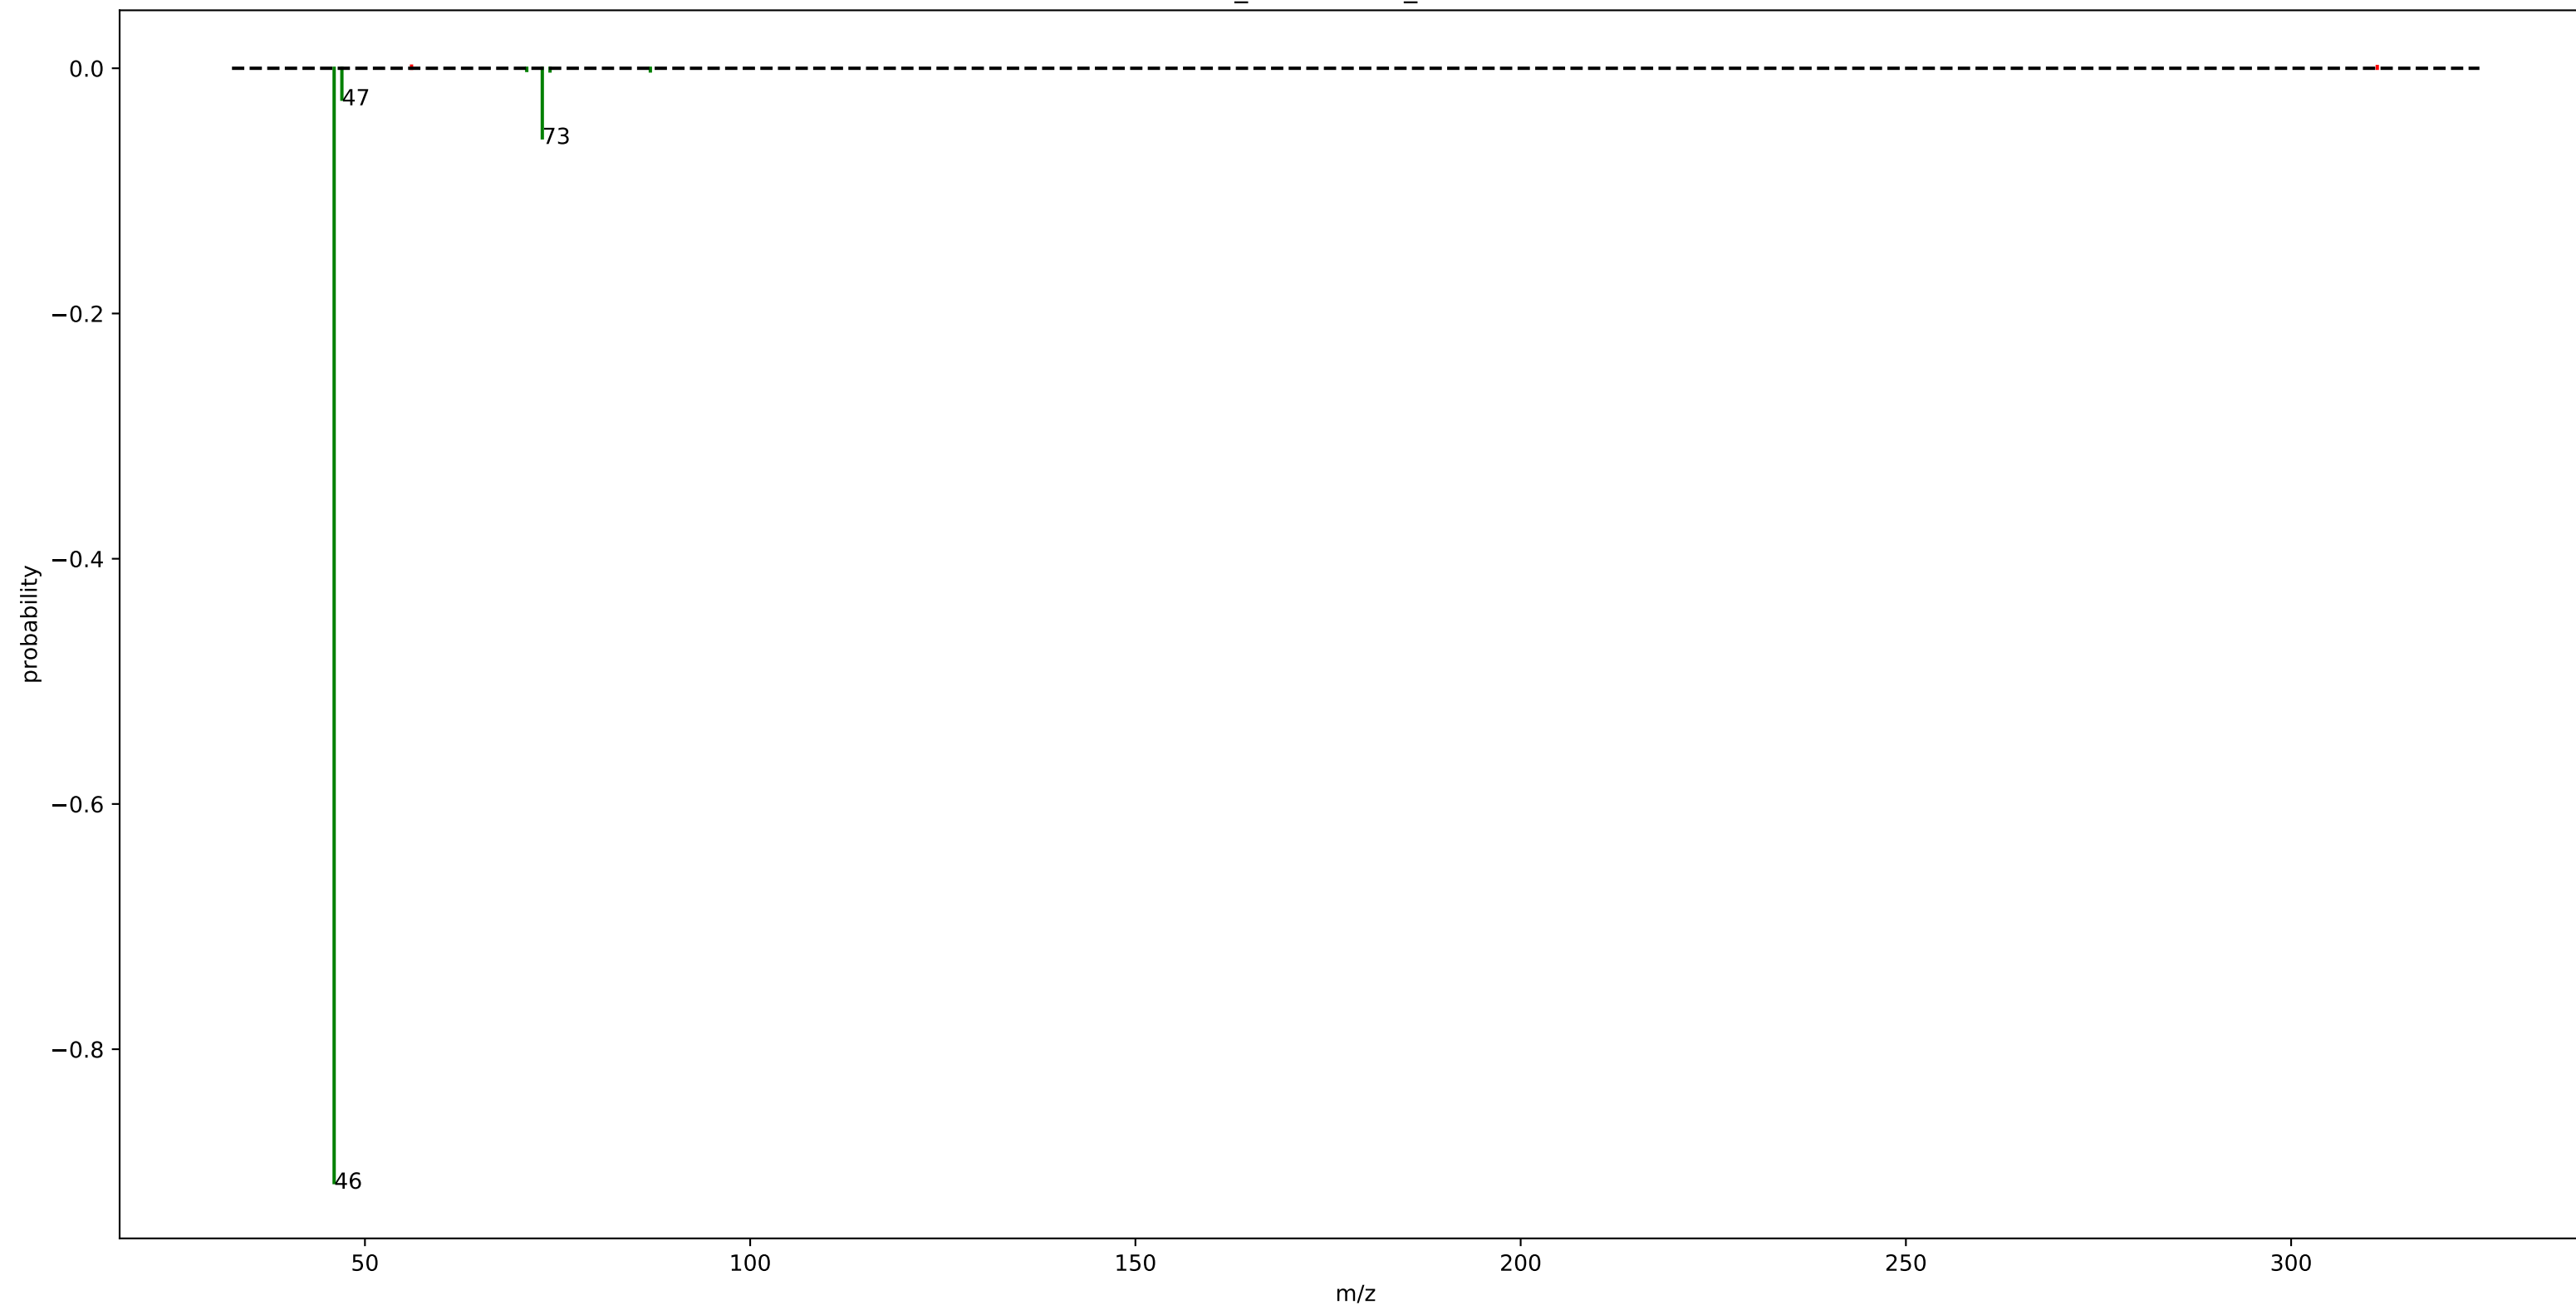

# urine\_mass2motif\_115.m2m

|              |        |
|--------------|--------|
| loss_46.0025 | : 0.91 |
| loss_73.0175 | : 0.06 |
| loss_47.0075 | : 0.03 |

rhabdus\_motif\_249.m2m

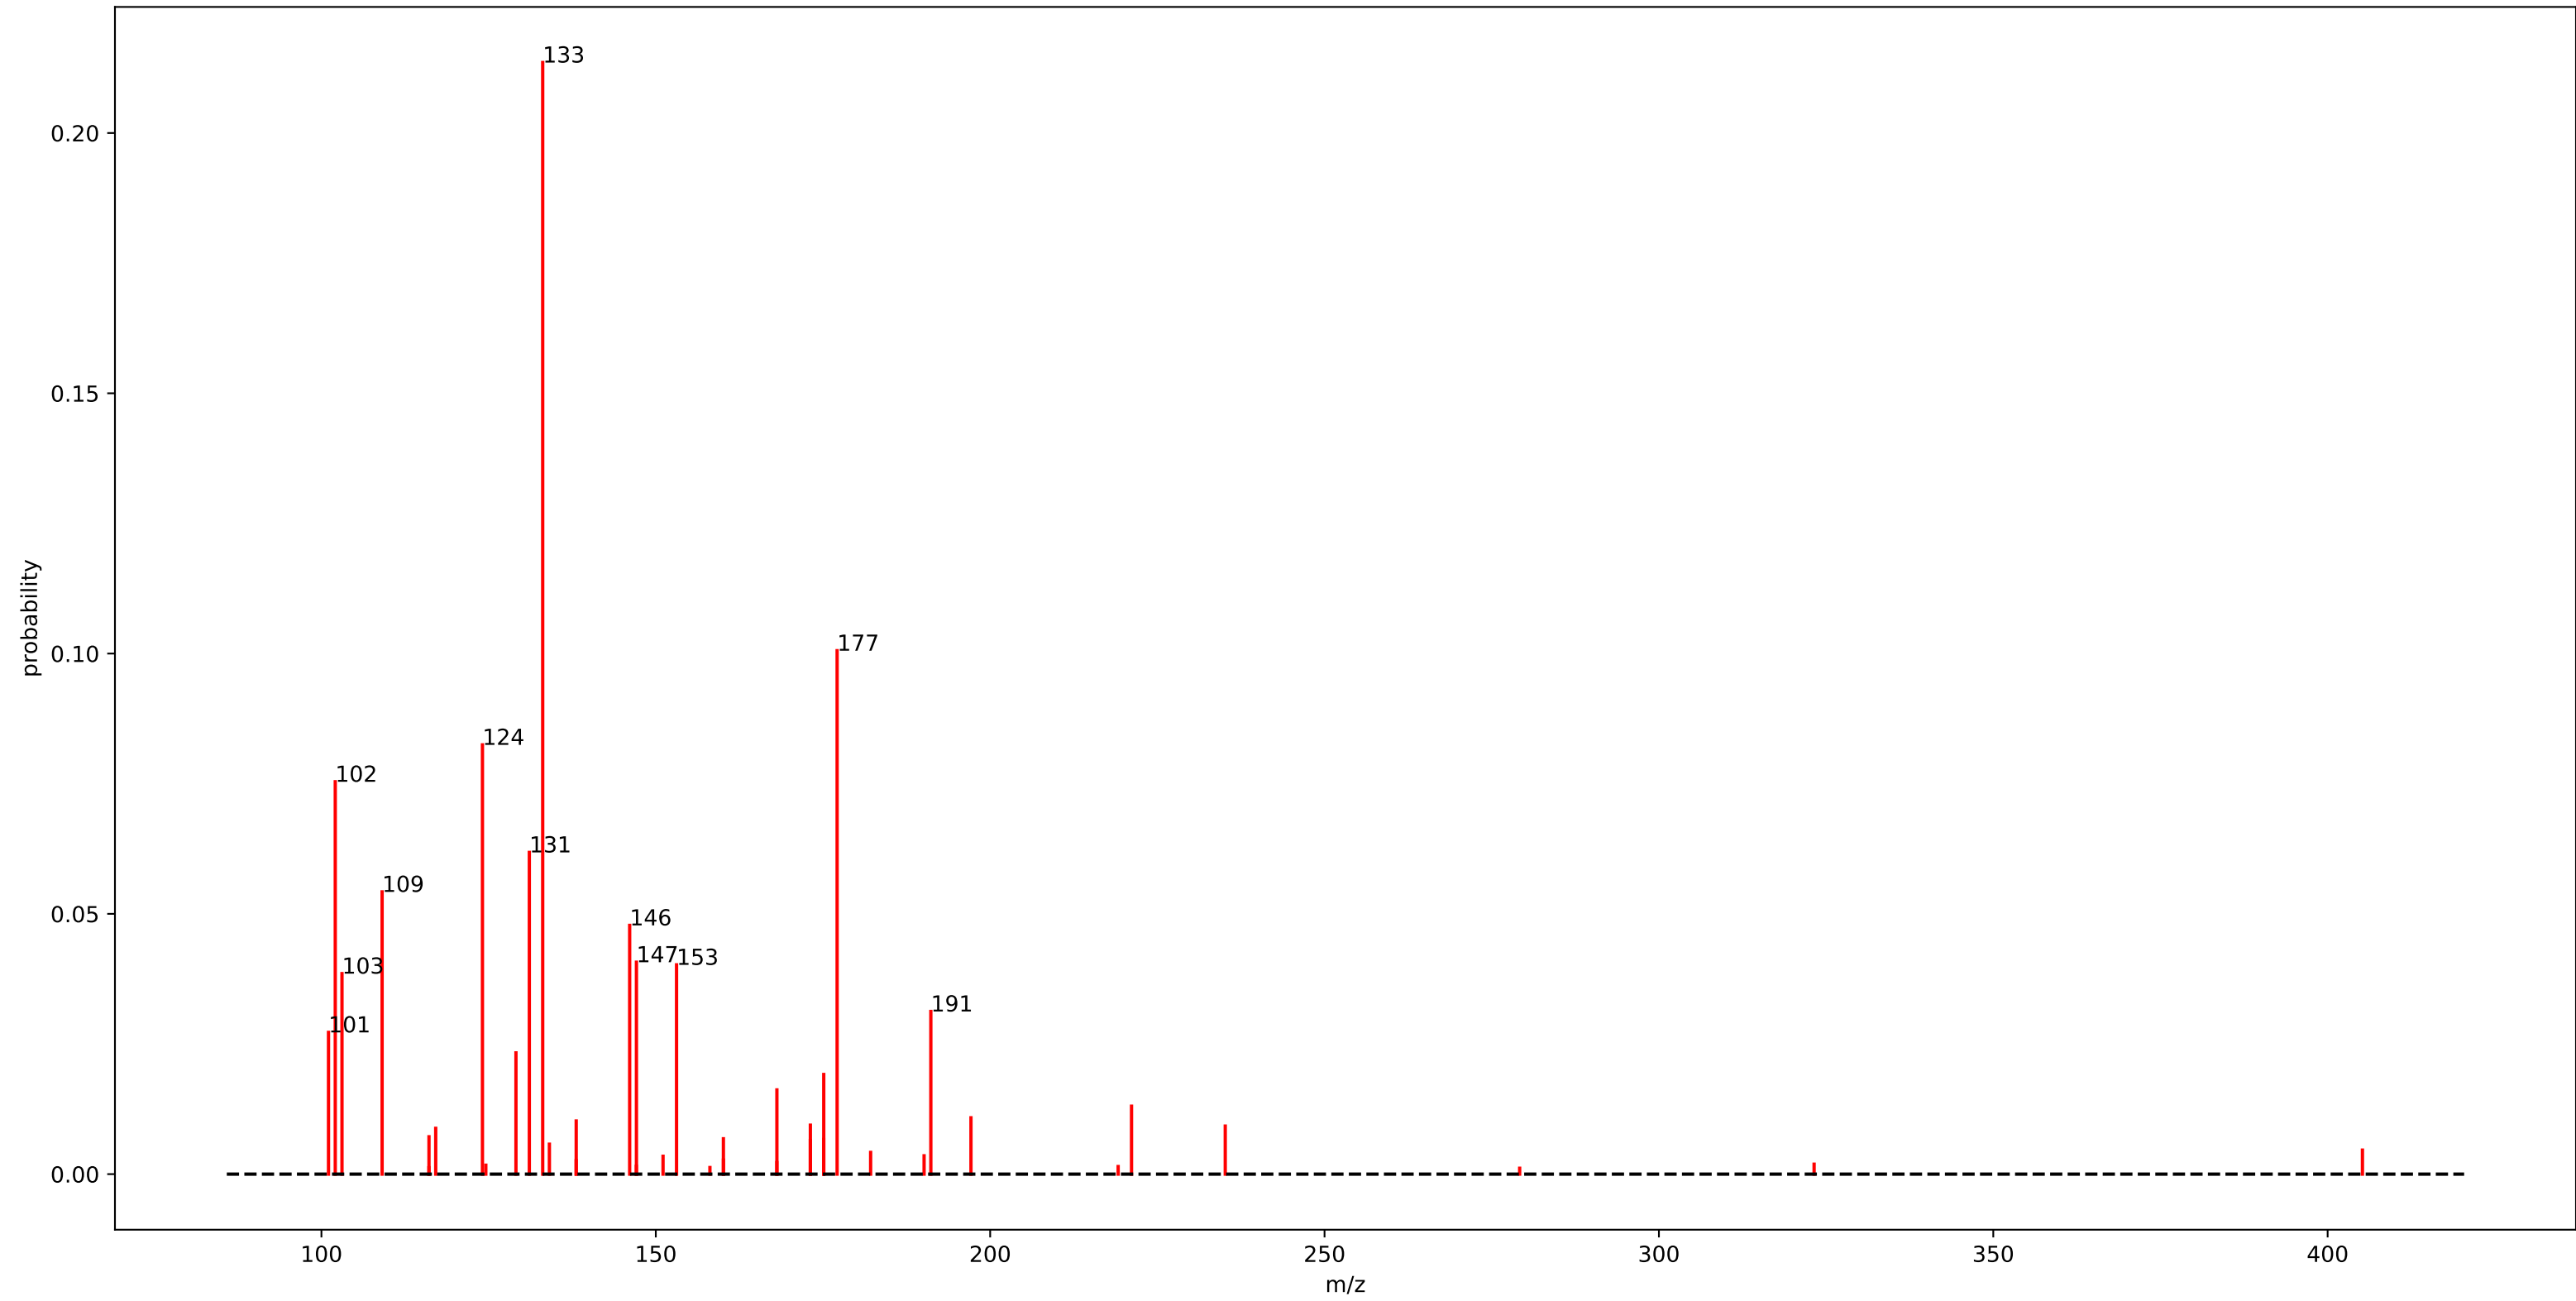

## rhabdus\_motif\_249.m2m

|                   |        |                   |        |
|-------------------|--------|-------------------|--------|
| fragment_133.0875 | : 0.21 | fragment_117.0875 | : 0.01 |
| fragment_177.1125 | : 0.10 | fragment_116.0825 | : 0.01 |
| fragment_124.0775 | : 0.08 | fragment_160.1075 | : 0.01 |
| fragment_102.0675 | : 0.08 | fragment_175.1075 | : 0.01 |
| fragment_131.0875 | : 0.06 | fragment_173.1075 | : 0.01 |
| fragment_109.0725 | : 0.05 | fragment_134.0875 | : 0.01 |
| fragment_146.0925 | : 0.05 |                   |        |
| fragment_147.1025 | : 0.04 |                   |        |
| fragment_153.1025 | : 0.04 |                   |        |
| fragment_103.0725 | : 0.04 |                   |        |
| fragment_191.1275 | : 0.03 |                   |        |
| fragment_101.0575 | : 0.03 |                   |        |
| fragment_129.0875 | : 0.02 |                   |        |
| fragment_175.1125 | : 0.02 |                   |        |
| fragment_168.1075 | : 0.02 |                   |        |
| fragment_221.1375 | : 0.01 |                   |        |
| fragment_197.1275 | : 0.01 |                   |        |
| fragment_138.0975 | : 0.01 |                   |        |
| fragment_173.1125 | : 0.01 |                   |        |
| fragment_235.1525 | : 0.01 |                   |        |

urine\_mass2motif\_64.m2m

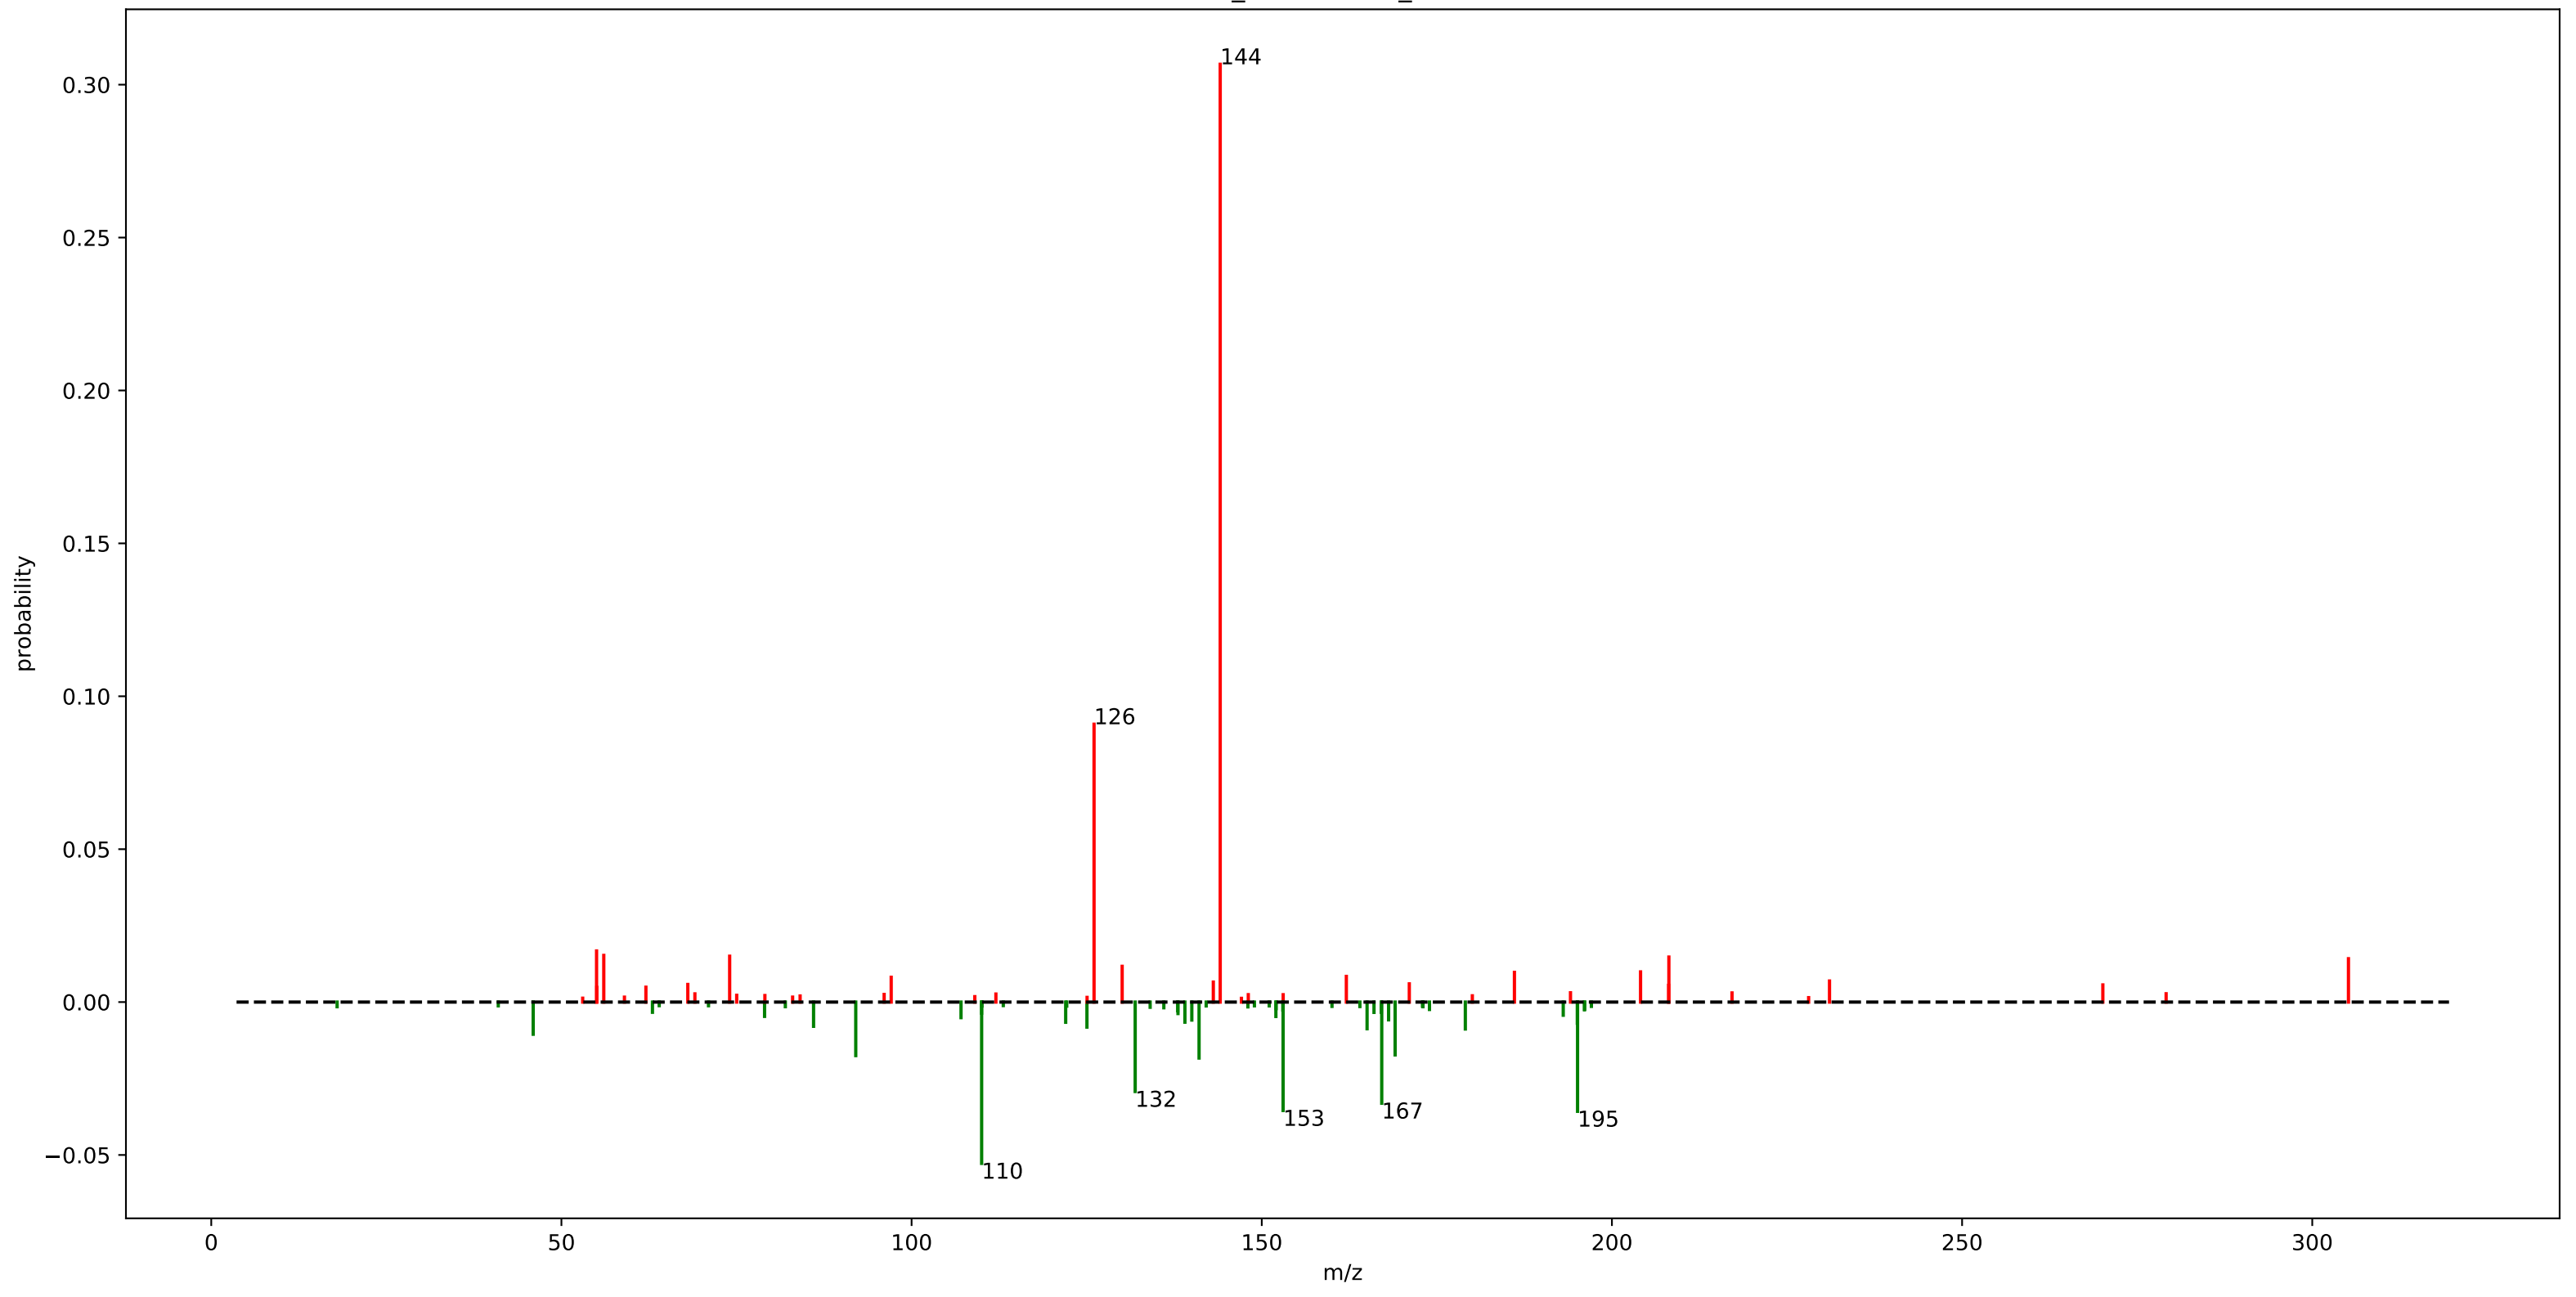

# urine\_mass2motif\_64.m2m

|                   |        |                   |        |
|-------------------|--------|-------------------|--------|
| fragment_144.0675 | : 0.31 | loss_165.0375     | : 0.01 |
| fragment_126.0525 | : 0.09 | fragment_162.0775 | : 0.01 |
| loss_110.0025     | : 0.05 | loss_125.0375     | : 0.01 |
| loss_195.0925     | : 0.04 | fragment_97.0875  | : 0.01 |
| loss_153.0475     | : 0.04 | loss_86.0025      | : 0.01 |
| loss_167.1325     | : 0.03 | loss_195.0575     | : 0.01 |
| loss_131.9275     | : 0.03 | fragment_231.0675 | : 0.01 |
| loss_141.0475     | : 0.02 | loss_122.0025     | : 0.01 |
| loss_92.0275      | : 0.02 | loss_139.0275     | : 0.01 |
| loss_169.0425     | : 0.02 | fragment_143.0825 | : 0.01 |
| fragment_55.0175  | : 0.02 | fragment_171.0675 | : 0.01 |
| fragment_56.0475  | : 0.02 | loss_140.0125     | : 0.01 |
| fragment_74.0225  | : 0.01 | loss_168.1125     | : 0.01 |
| fragment_208.1325 | : 0.01 | fragment_68.0475  | : 0.01 |
| fragment_305.1675 | : 0.01 | fragment_270.0975 | : 0.01 |
| fragment_130.0675 | : 0.01 | fragment_208.0975 | : 0.01 |
| loss_45.9675      | : 0.01 | loss_107.0575     | : 0.01 |
| fragment_204.0875 | : 0.01 |                   |        |
| fragment_186.0775 | : 0.01 |                   |        |
| loss_179.0675     | : 0.01 |                   |        |

gnps\_motif\_25.m2m

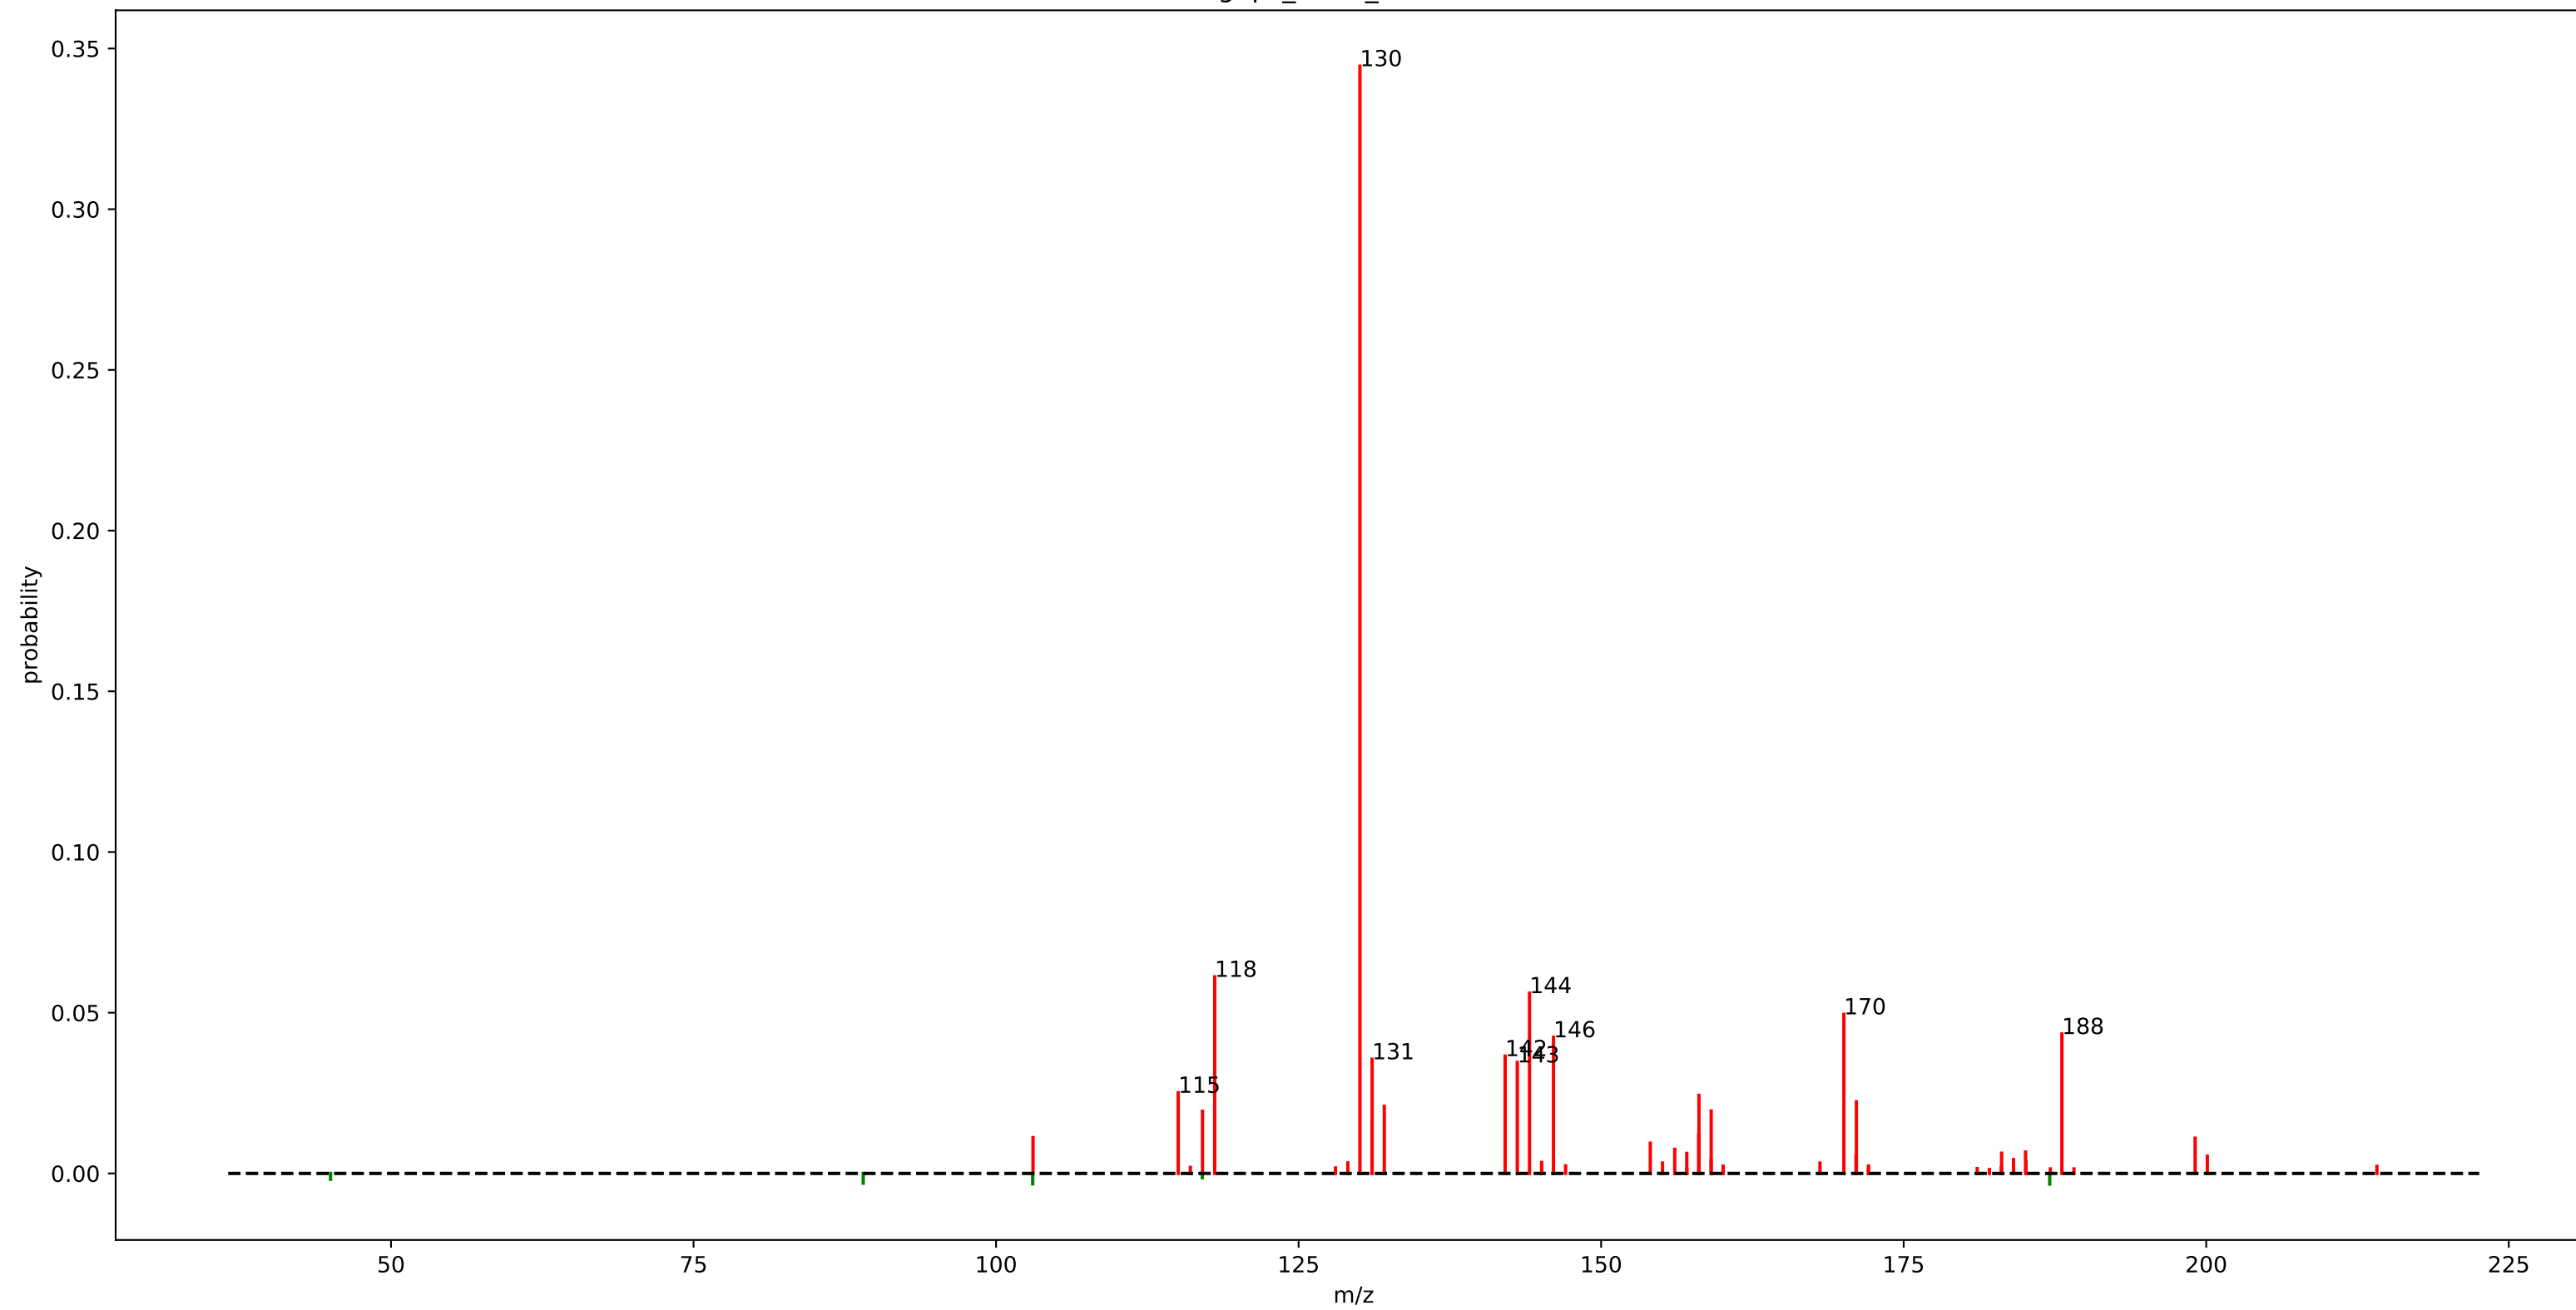

## gnps\_motif\_25.m2m

|                   |        |                   |        |
|-------------------|--------|-------------------|--------|
| fragment_130.0675 | : 0.34 | fragment_156.0825 | : 0.01 |
| fragment_118.0675 | : 0.06 | fragment_185.0725 | : 0.01 |
| fragment_144.0825 | : 0.06 | fragment_183.0925 | : 0.01 |
| fragment_170.0575 | : 0.05 | fragment_157.0775 | : 0.01 |
| fragment_188.0725 | : 0.04 | fragment_171.0625 | : 0.01 |
| fragment_146.0625 | : 0.04 | fragment_200.0925 | : 0.01 |
| fragment_142.0675 | : 0.04 |                   |        |
| fragment_131.0725 | : 0.04 |                   |        |
| fragment_143.0725 | : 0.03 |                   |        |
| fragment_115.0525 | : 0.03 |                   |        |
| fragment_158.0825 | : 0.02 |                   |        |
| fragment_171.0925 | : 0.02 |                   |        |
| fragment_132.0825 | : 0.02 |                   |        |
| fragment_159.0925 | : 0.02 |                   |        |
| fragment_117.0575 | : 0.02 |                   |        |
| fragment_131.0675 | : 0.02 |                   |        |
| fragment_158.0625 | : 0.01 |                   |        |
| fragment_103.0525 | : 0.01 |                   |        |
| fragment_199.0875 | : 0.01 |                   |        |
| fragment_154.0625 | : 0.01 |                   |        |



rhamn\_motif\_48.m2m

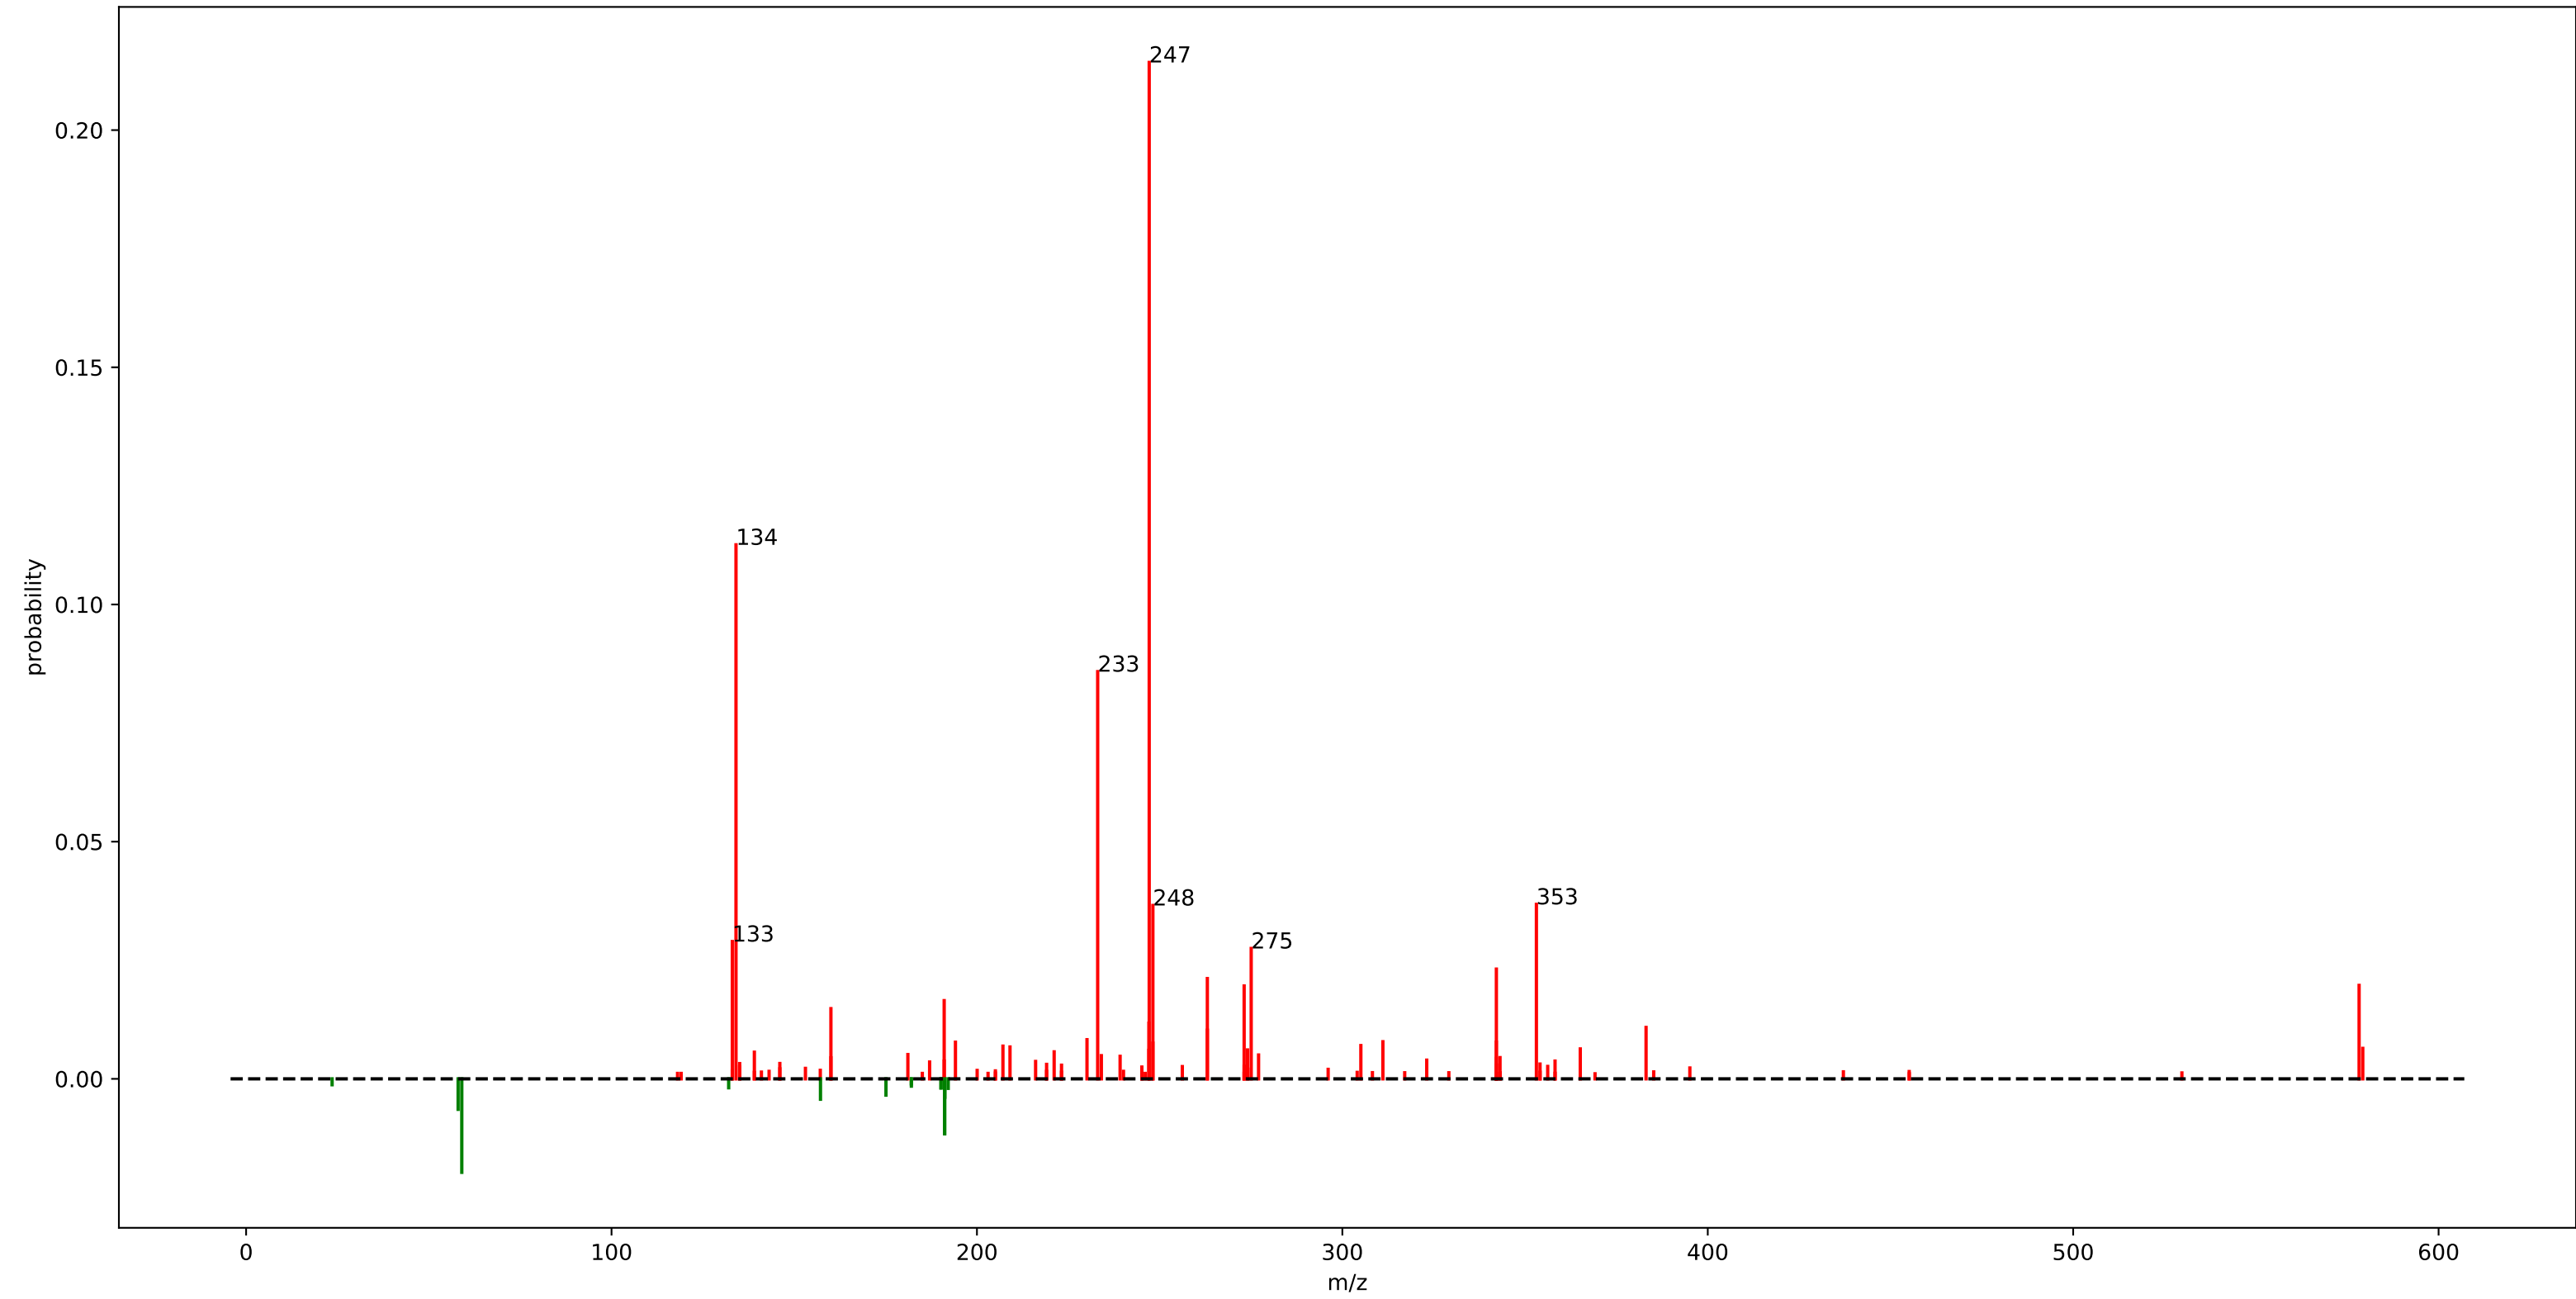

# rhamn\_motif\_48.m2m

|                   |        |                   |        |
|-------------------|--------|-------------------|--------|
| fragment_247.1425 | : 0.21 | fragment_311.0925 | : 0.01 |
| fragment_134.0625 | : 0.11 | fragment_342.1375 | : 0.01 |
| fragment_233.0425 | : 0.09 | fragment_194.1175 | : 0.01 |
| fragment_353.1025 | : 0.04 | fragment_248.1525 | : 0.01 |
| fragment_248.1475 | : 0.04 | fragment_305.0625 | : 0.01 |
| fragment_133.0525 | : 0.03 | fragment_207.1125 | : 0.01 |
| fragment_275.0525 | : 0.03 | fragment_209.0475 | : 0.01 |
| fragment_342.1475 | : 0.02 | loss_58.0175      | : 0.01 |
| fragment_263.0525 | : 0.02 | fragment_579.2525 | : 0.01 |
| loss_59.0225      | : 0.02 | fragment_365.1075 | : 0.01 |
| fragment_578.2475 | : 0.02 | fragment_274.0475 | : 0.01 |
| fragment_273.1225 | : 0.02 | fragment_247.0575 | : 0.01 |
| fragment_191.0325 | : 0.02 | fragment_221.1275 | : 0.01 |
| fragment_160.0375 | : 0.01 | fragment_139.0875 | : 0.01 |
| fragment_247.0625 | : 0.01 | fragment_181.0975 | : 0.01 |
| loss_191.1675     | : 0.01 | fragment_277.0725 | : 0.01 |
| loss_191.1625     | : 0.01 |                   |        |
| fragment_383.1125 | : 0.01 |                   |        |
| fragment_263.0575 | : 0.01 |                   |        |
| fragment_230.1175 | : 0.01 |                   |        |

urine\_mass2motif\_57.m2m

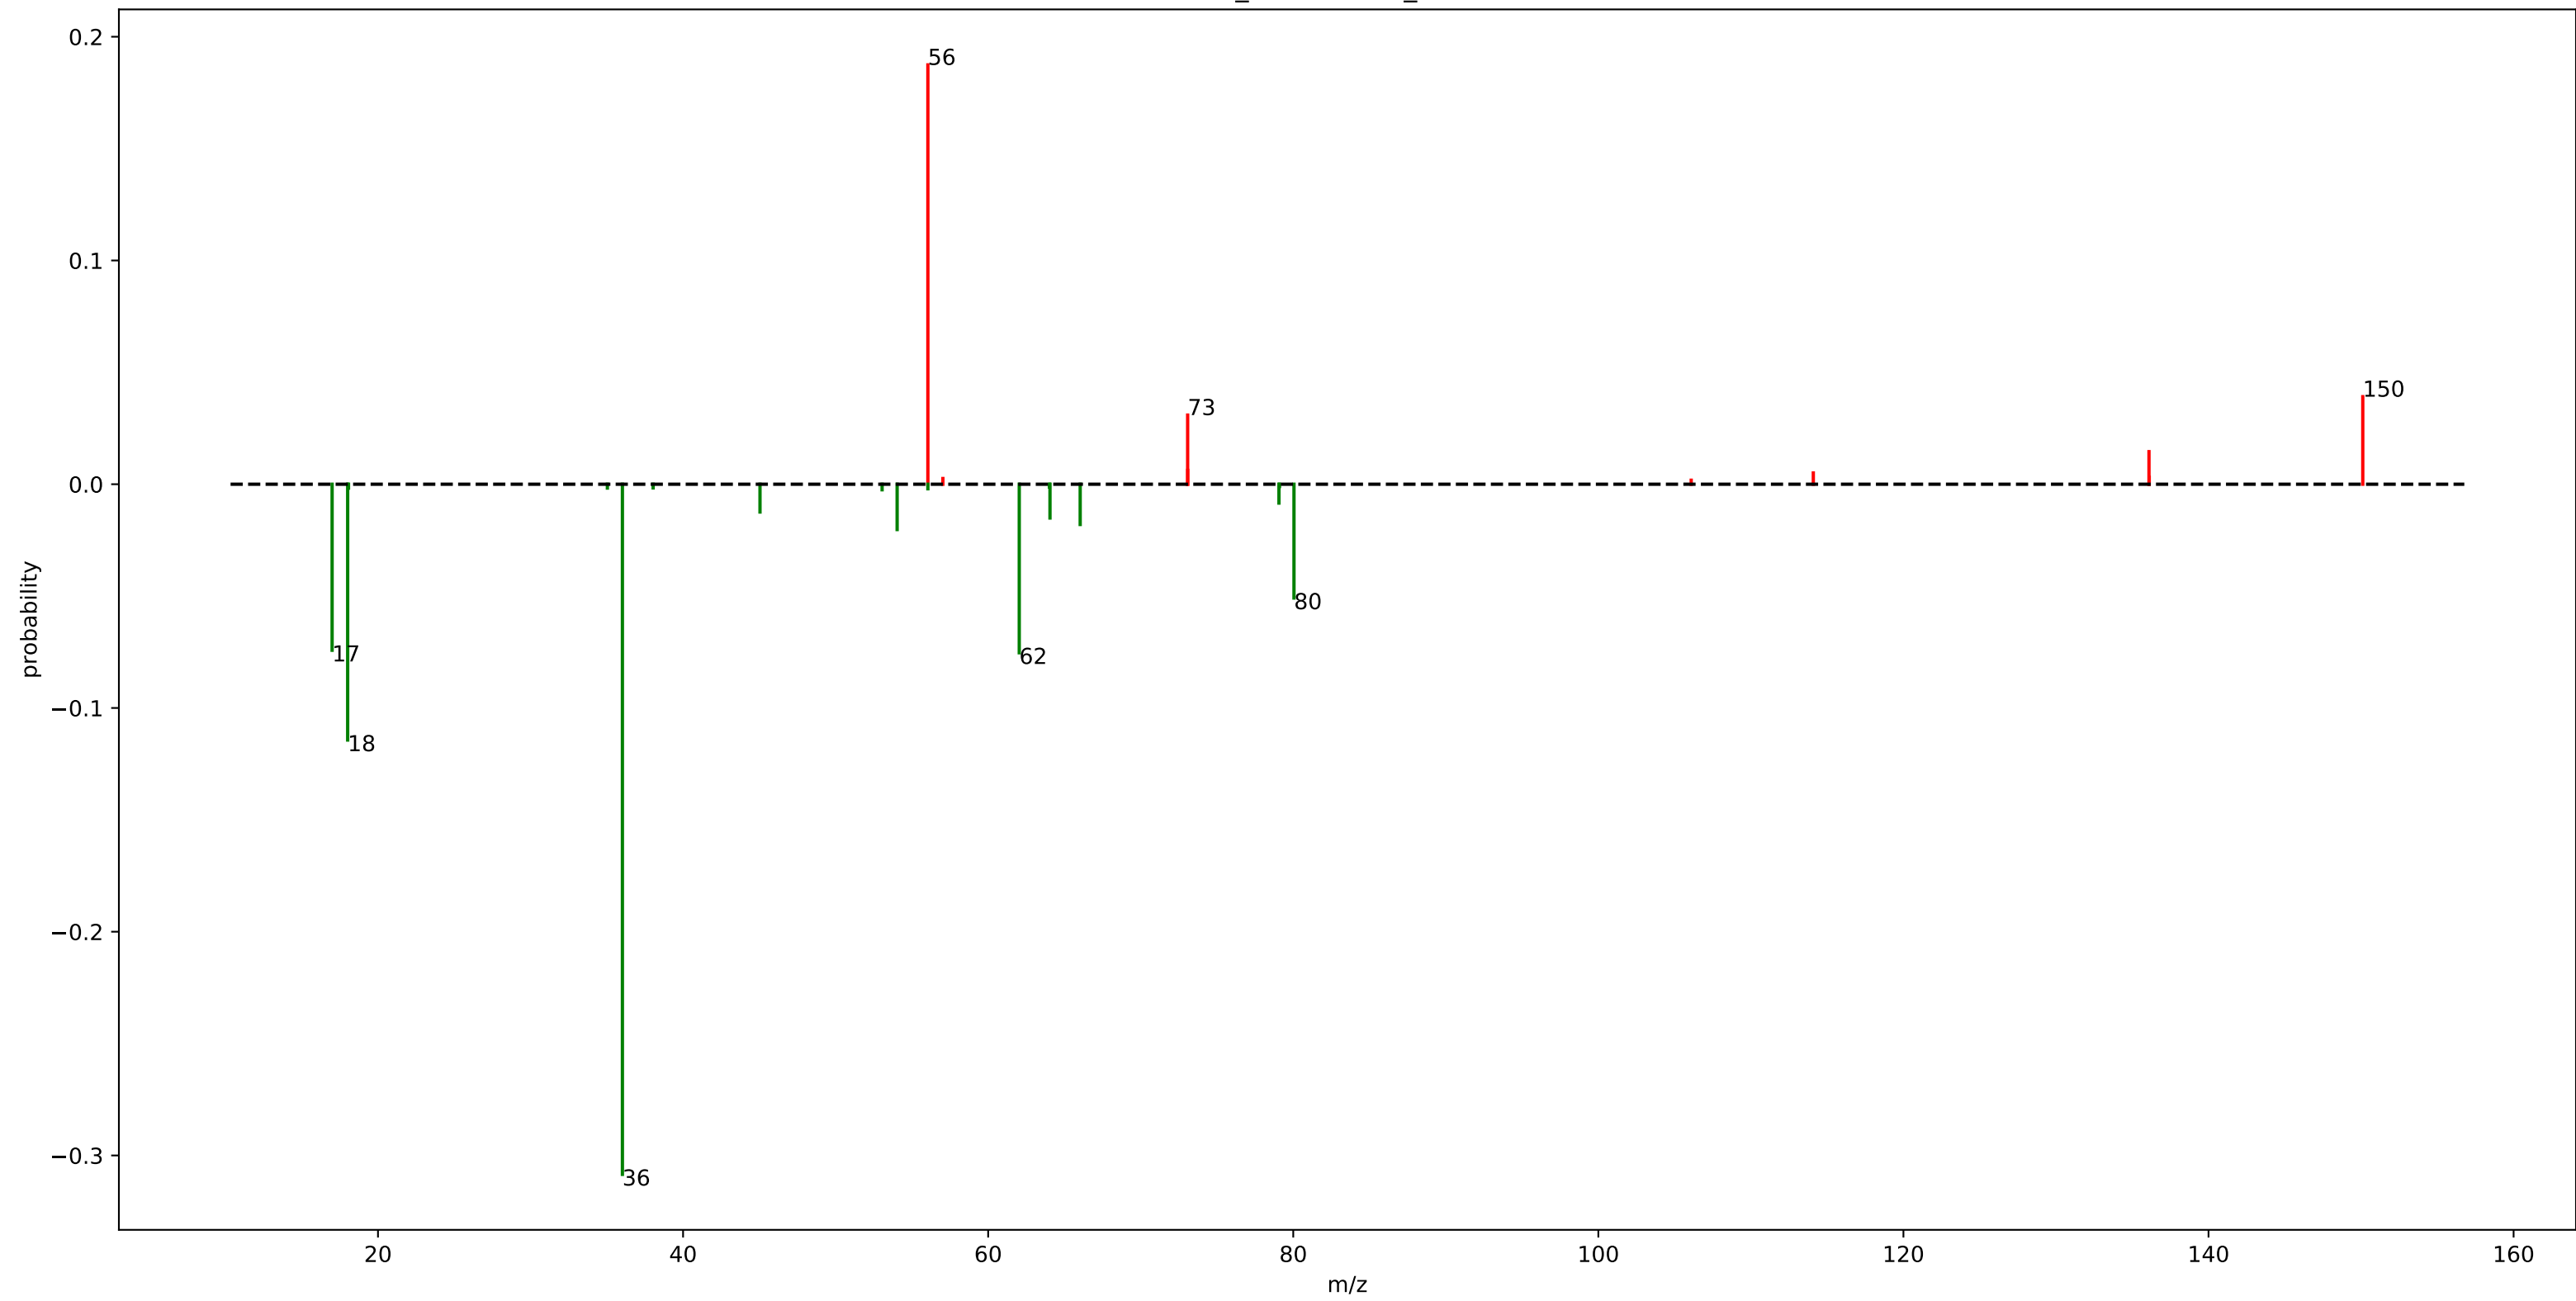

## urine\_mass2motif\_57.m2m

|                   |        |
|-------------------|--------|
| loss_36.0225      | : 0.31 |
| fragment_56.0475  | : 0.19 |
| loss_18.0125      | : 0.11 |
| loss_62.0375      | : 0.08 |
| loss_16.9925      | : 0.07 |
| loss_80.0475      | : 0.05 |
| fragment_150.1125 | : 0.04 |
| fragment_73.0775  | : 0.03 |
| loss_54.0325      | : 0.02 |
| loss_66.0325      | : 0.02 |
| loss_64.0525      | : 0.02 |
| fragment_136.0975 | : 0.01 |
| loss_45.0425      | : 0.01 |
| loss_79.0625      | : 0.01 |
| fragment_73.0825  | : 0.01 |
| fragment_114.0925 | : 0.01 |

urine\_mass2motif\_163.m2m

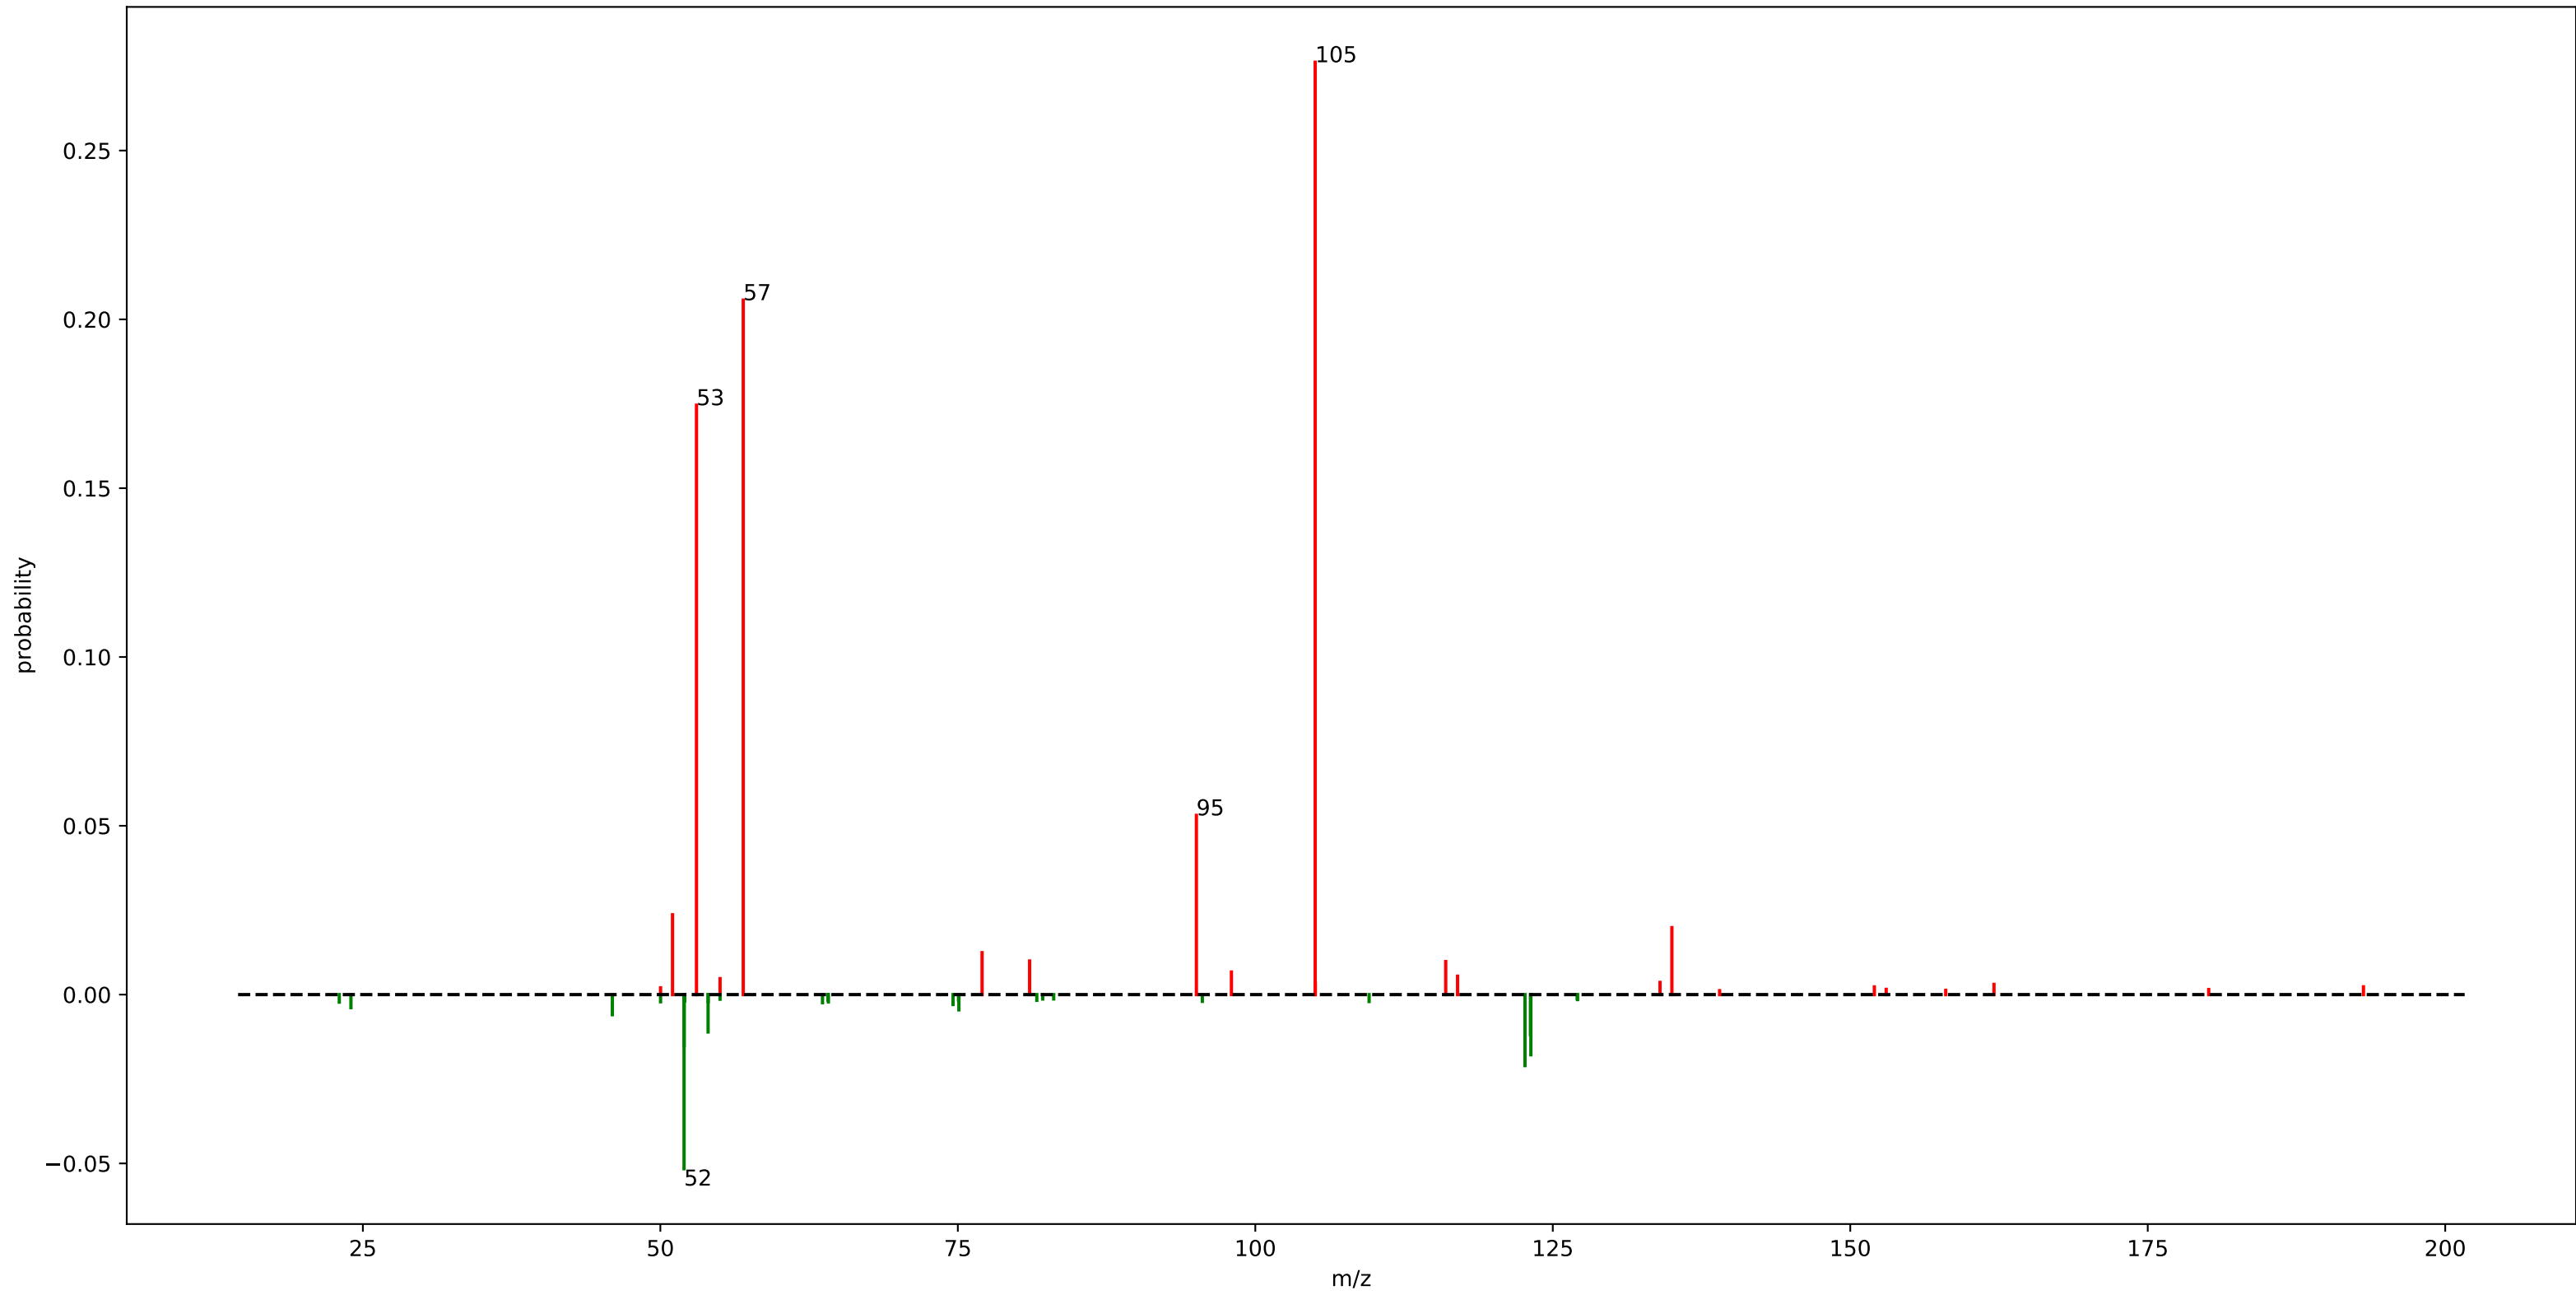

## urine\_mass2motif\_163.m2m

|                   |        |
|-------------------|--------|
| fragment_105.0325 | : 0.28 |
| fragment_56.9675  | : 0.21 |
| fragment_53.0375  | : 0.17 |
| fragment_95.0475  | : 0.05 |
| loss_51.9925      | : 0.05 |
| fragment_51.0225  | : 0.02 |
| loss_122.6625     | : 0.02 |
| fragment_135.0075 | : 0.02 |
| loss_123.1575     | : 0.02 |
| loss_52.0025      | : 0.02 |
| fragment_77.0375  | : 0.01 |
| loss_123.1225     | : 0.01 |
| loss_54.0125      | : 0.01 |
| fragment_81.0325  | : 0.01 |
| fragment_116.0025 | : 0.01 |
| fragment_97.9925  | : 0.01 |
| loss_45.9675      | : 0.01 |
| fragment_116.9975 | : 0.01 |

StrepSalini\_motif\_196.m2m

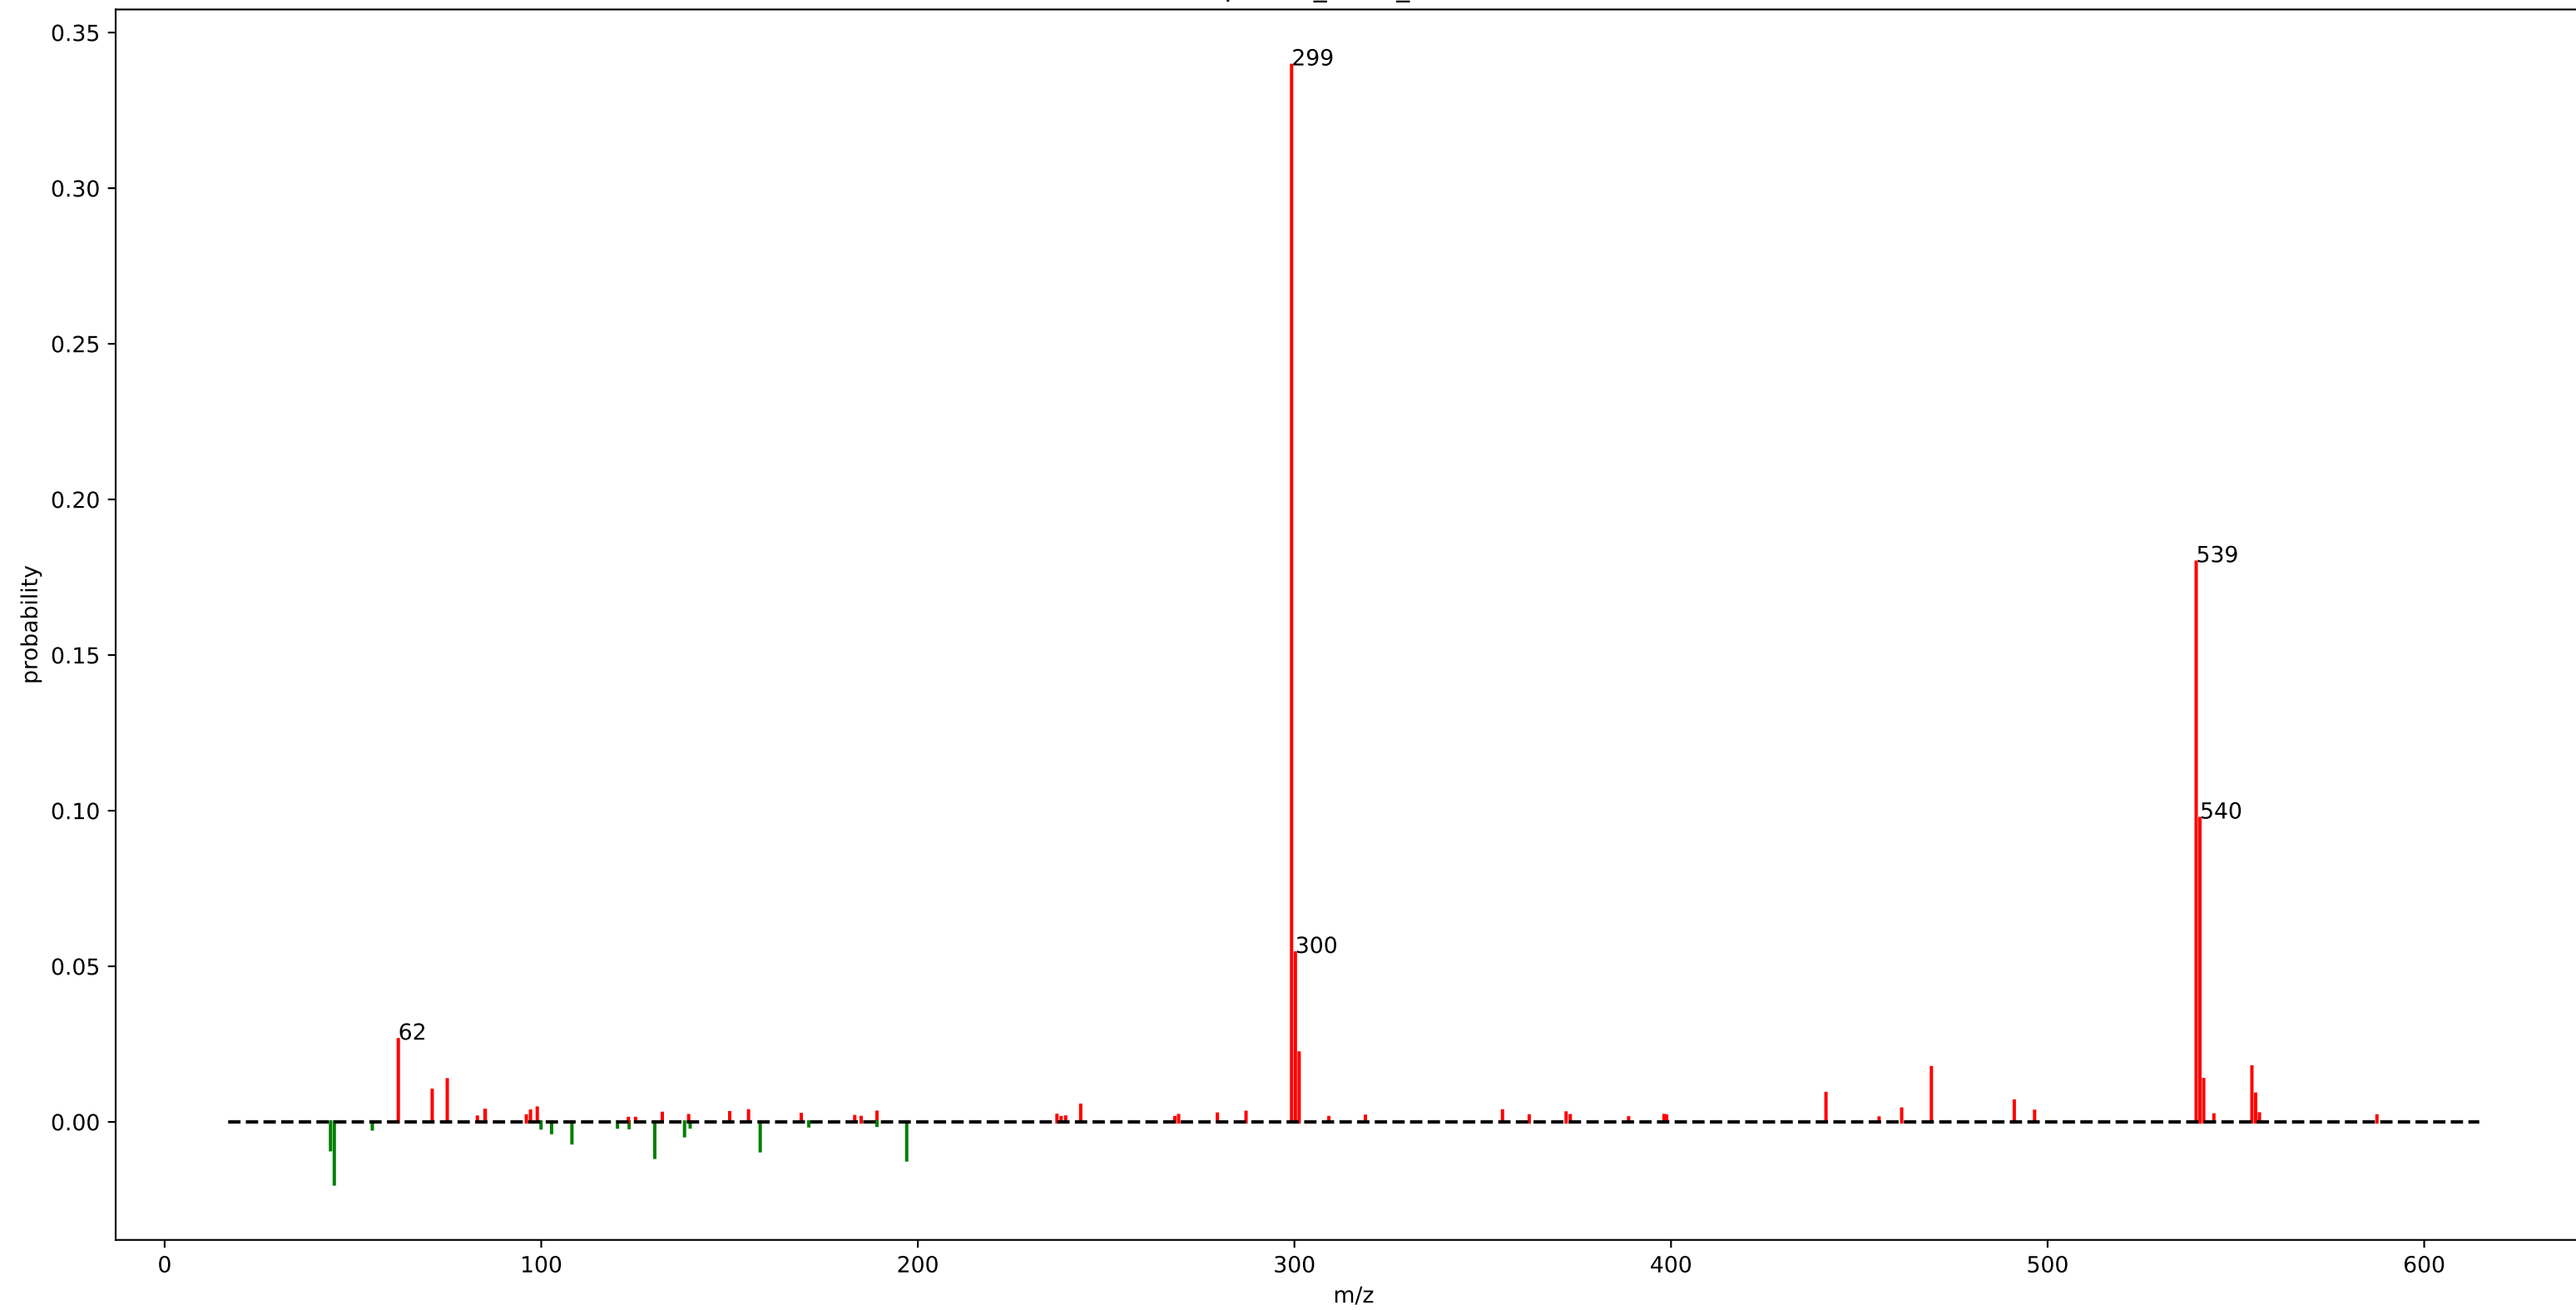

# StrepSalini\_motif\_196.m2m

|                   |        |                   |        |
|-------------------|--------|-------------------|--------|
| fragment_299.2500 | : 0.34 | fragment_243.2500 | : 0.01 |
| fragment_539.4500 | : 0.18 |                   |        |
| fragment_540.4500 | : 0.10 |                   |        |
| fragment_300.2500 | : 0.05 |                   |        |
| fragment_62.0500  | : 0.03 |                   |        |
| fragment_301.2525 | : 0.02 |                   |        |
| loss_45.0500      | : 0.02 |                   |        |
| fragment_554.2500 | : 0.02 |                   |        |
| fragment_469.1500 | : 0.02 |                   |        |
| fragment_541.4500 | : 0.01 |                   |        |
| fragment_75.0500  | : 0.01 |                   |        |
| loss_197.0500     | : 0.01 |                   |        |
| loss_130.1500     | : 0.01 |                   |        |
| fragment_71.0500  | : 0.01 |                   |        |
| loss_158.1500     | : 0.01 |                   |        |
| fragment_441.1500 | : 0.01 |                   |        |
| fragment_555.2500 | : 0.01 |                   |        |
| loss_44.0500      | : 0.01 |                   |        |
| loss_108.1525     | : 0.01 |                   |        |
| fragment_491.1500 | : 0.01 |                   |        |



StrepSalini\_motif\_205.m2m

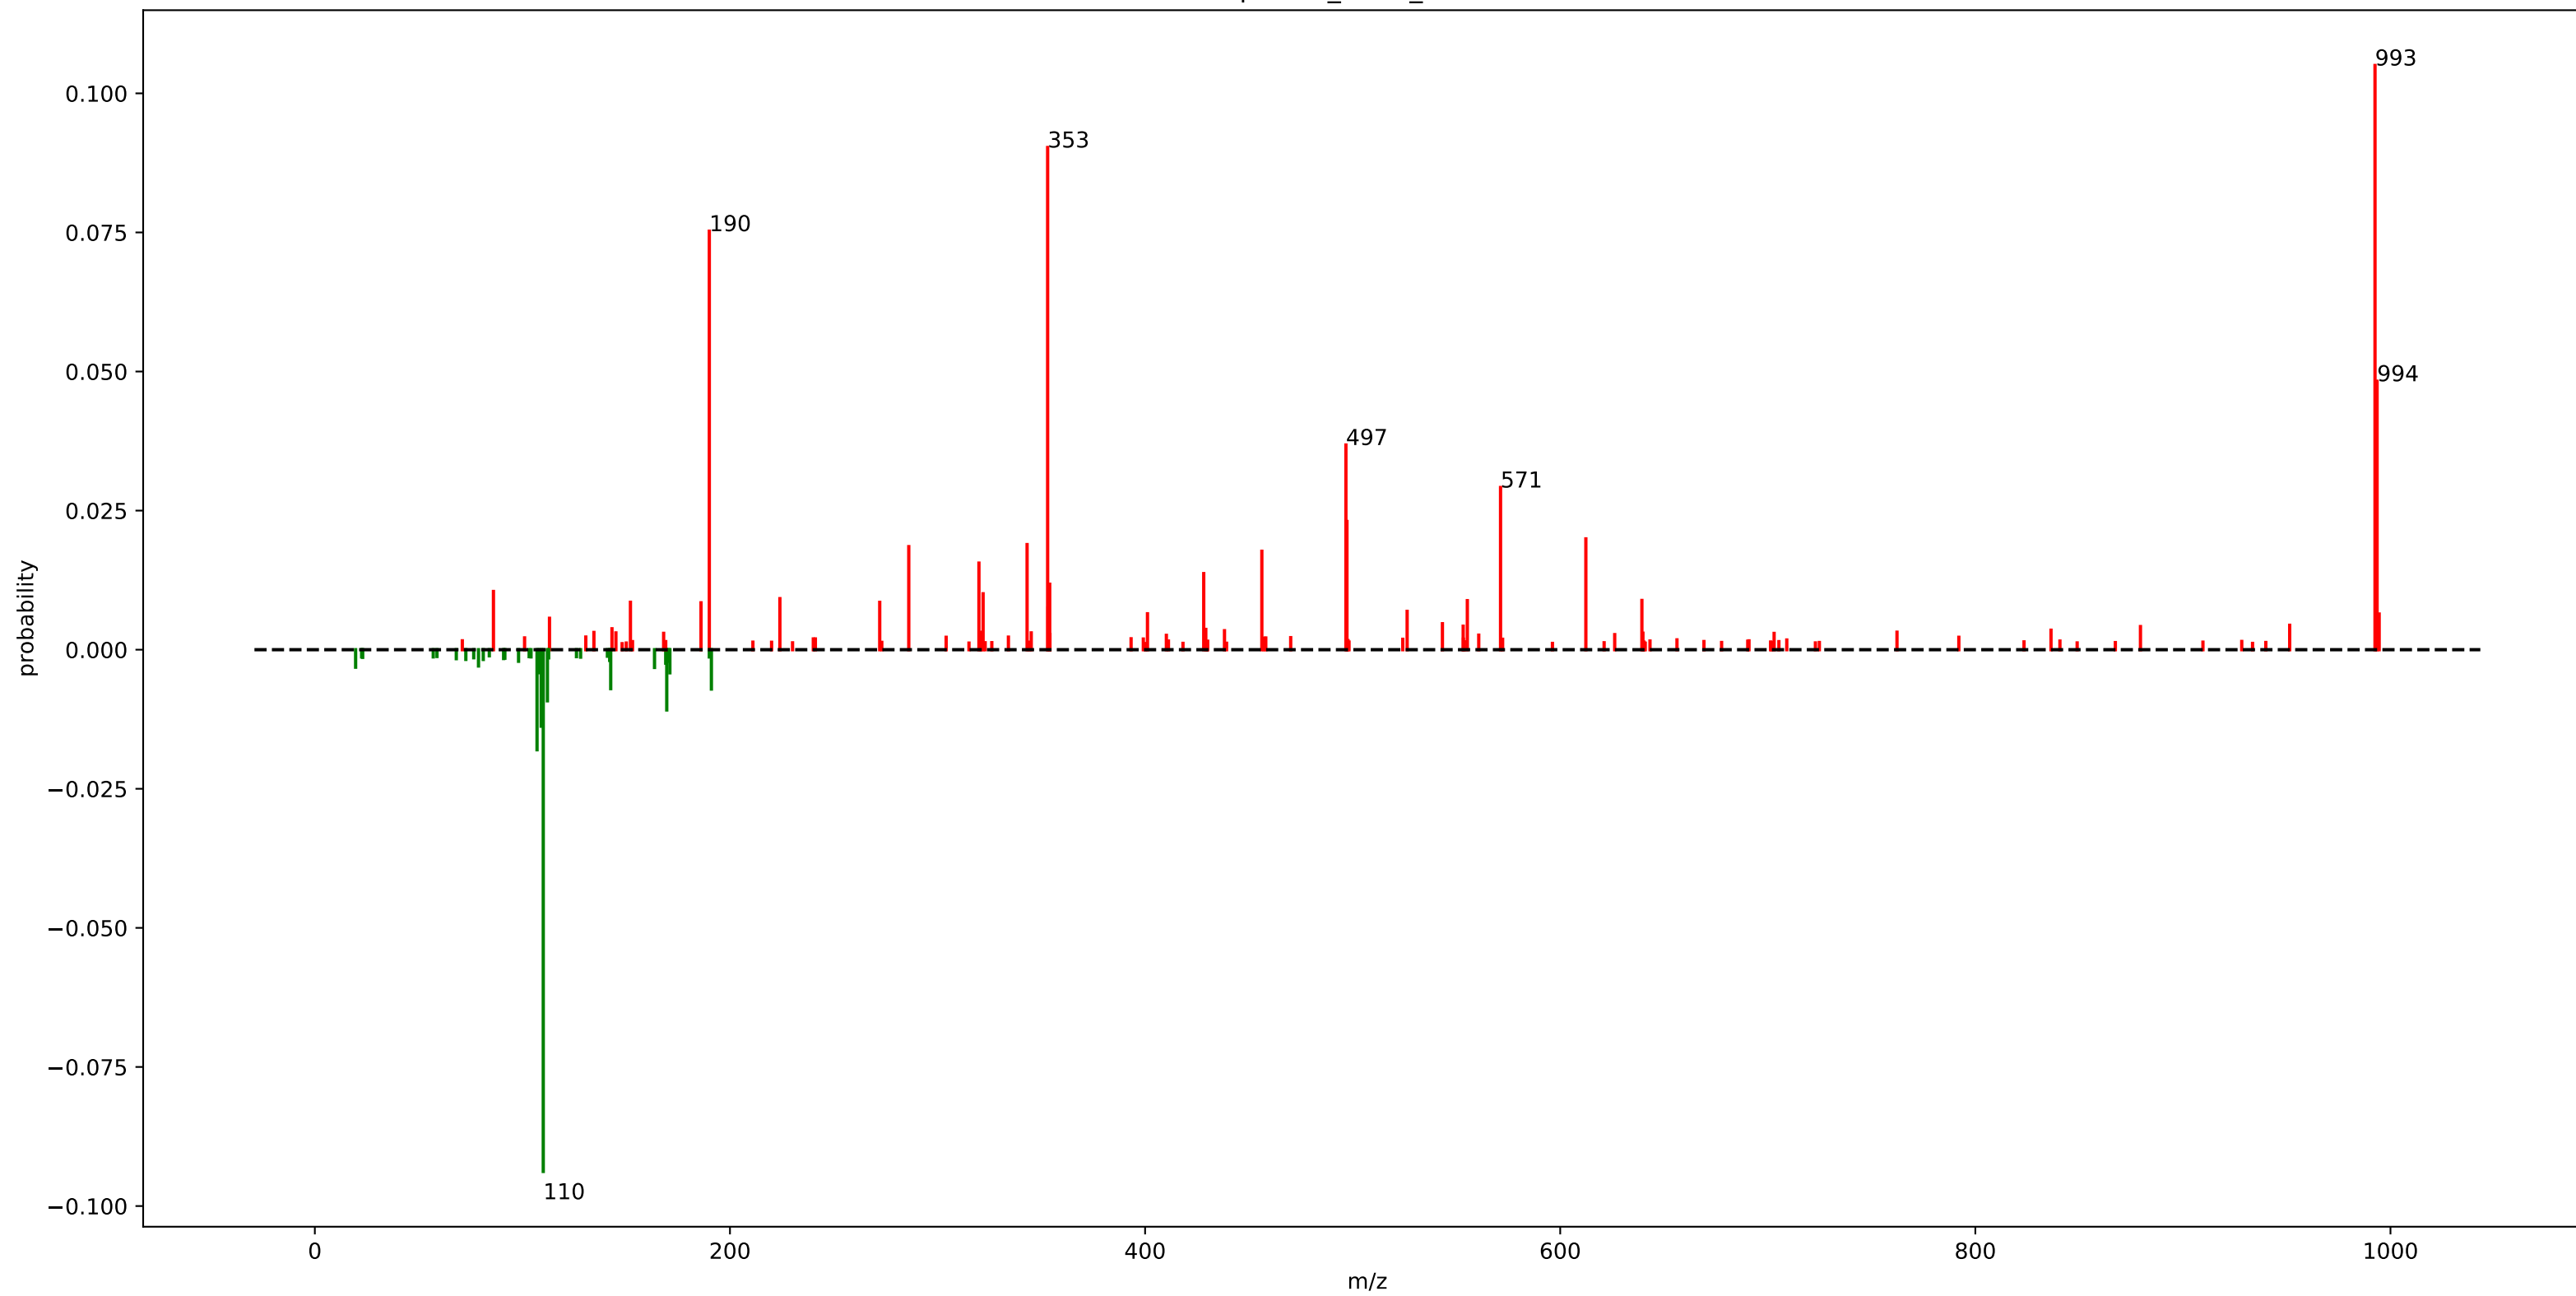

# StrepSalini\_motif\_205.m2m

|                   |        |                   |        |
|-------------------|--------|-------------------|--------|
| fragment_992.5500 | : 0.11 | loss_112.0500     | : 0.01 |
| loss_110.0500     | : 0.09 | fragment_224.0500 | : 0.01 |
| fragment_353.0500 | : 0.09 | fragment_639.3500 | : 0.01 |
| fragment_190.0500 | : 0.08 | fragment_555.2500 | : 0.01 |
| fragment_993.5500 | : 0.05 | fragment_152.0500 | : 0.01 |
| fragment_496.7500 | : 0.04 | fragment_272.1500 | : 0.01 |
| fragment_571.2500 | : 0.03 | fragment_186.0500 | : 0.01 |
| fragment_497.2500 | : 0.02 | fragment_353.2500 | : 0.01 |
| fragment_612.3500 | : 0.02 | loss_191.0500     | : 0.01 |
| fragment_343.1500 | : 0.02 | loss_142.5500     | : 0.01 |
| fragment_286.1500 | : 0.02 | fragment_526.2500 | : 0.01 |
| loss_107.0500     | : 0.02 | fragment_401.1500 | : 0.01 |
| fragment_456.2500 | : 0.02 | fragment_994.5500 | : 0.01 |
| fragment_319.9500 | : 0.02 | fragment_113.0500 | : 0.01 |
| loss_109.0525     | : 0.01 |                   |        |
| fragment_428.2500 | : 0.01 |                   |        |
| fragment_354.0500 | : 0.01 |                   |        |
| loss_169.5500     | : 0.01 |                   |        |
| fragment_86.0500  | : 0.01 |                   |        |
| fragment_321.9500 | : 0.01 |                   |        |

gnps\_motif\_4.m2m

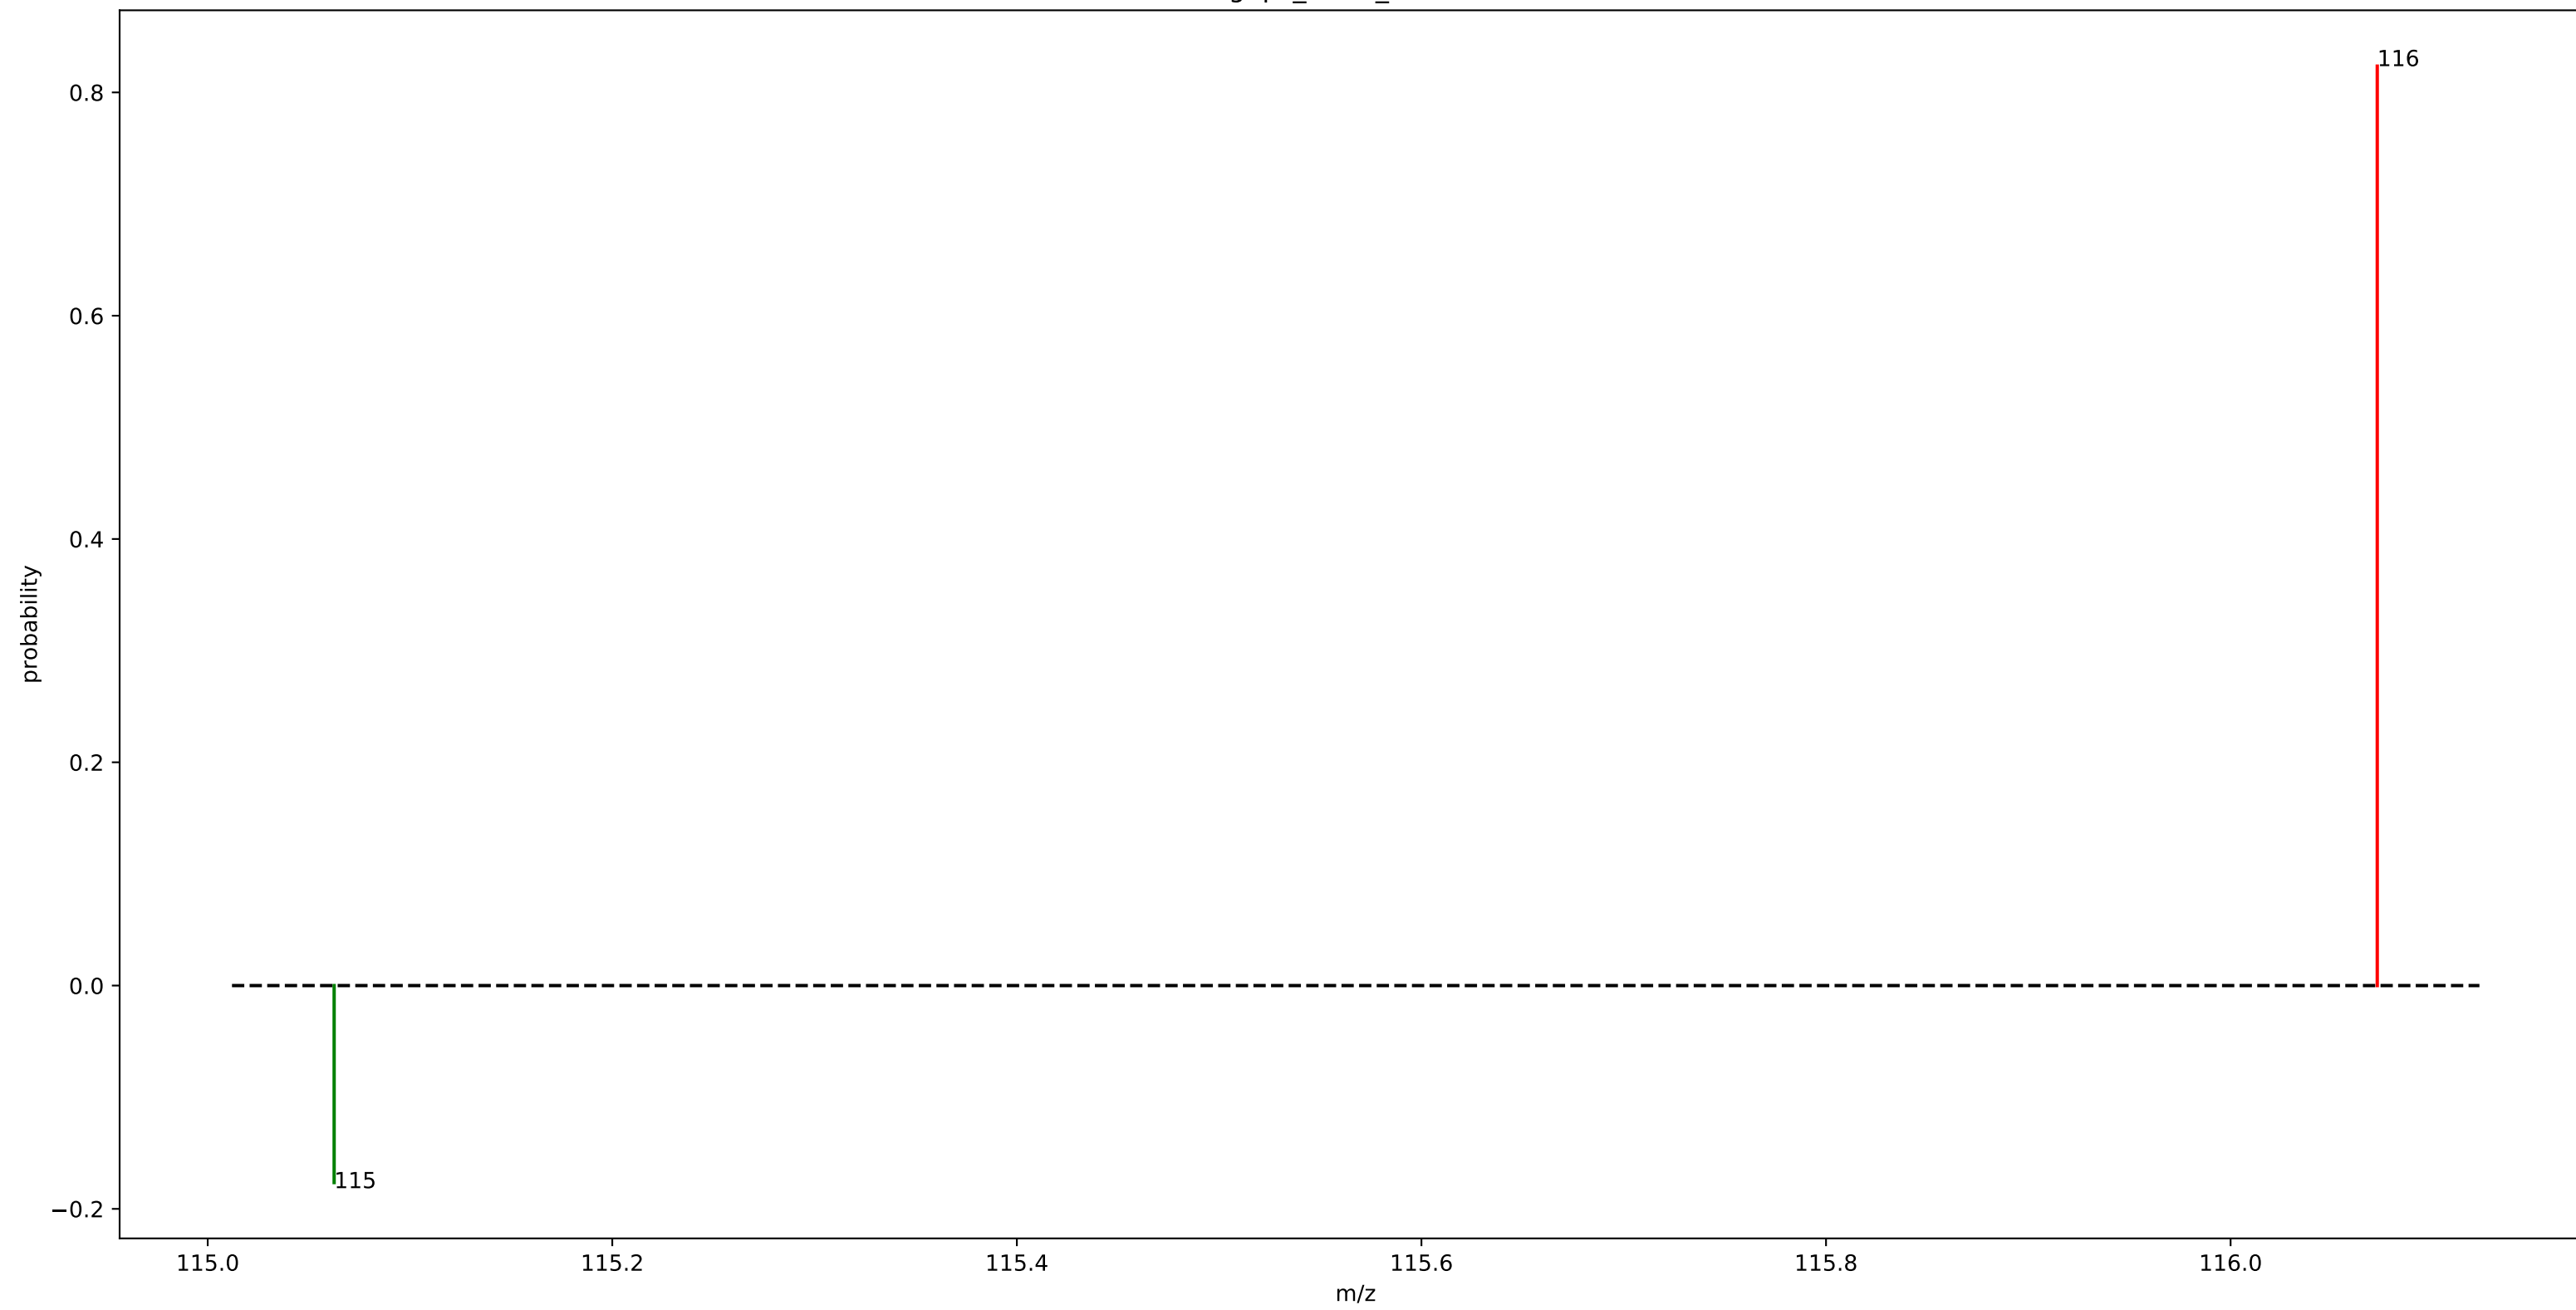

# gnps\_motif\_4.m2m

fragment\_116.0725 : 0.82  
loss\_115.0625 : 0.18

urine\_mass2motif\_248.m2m

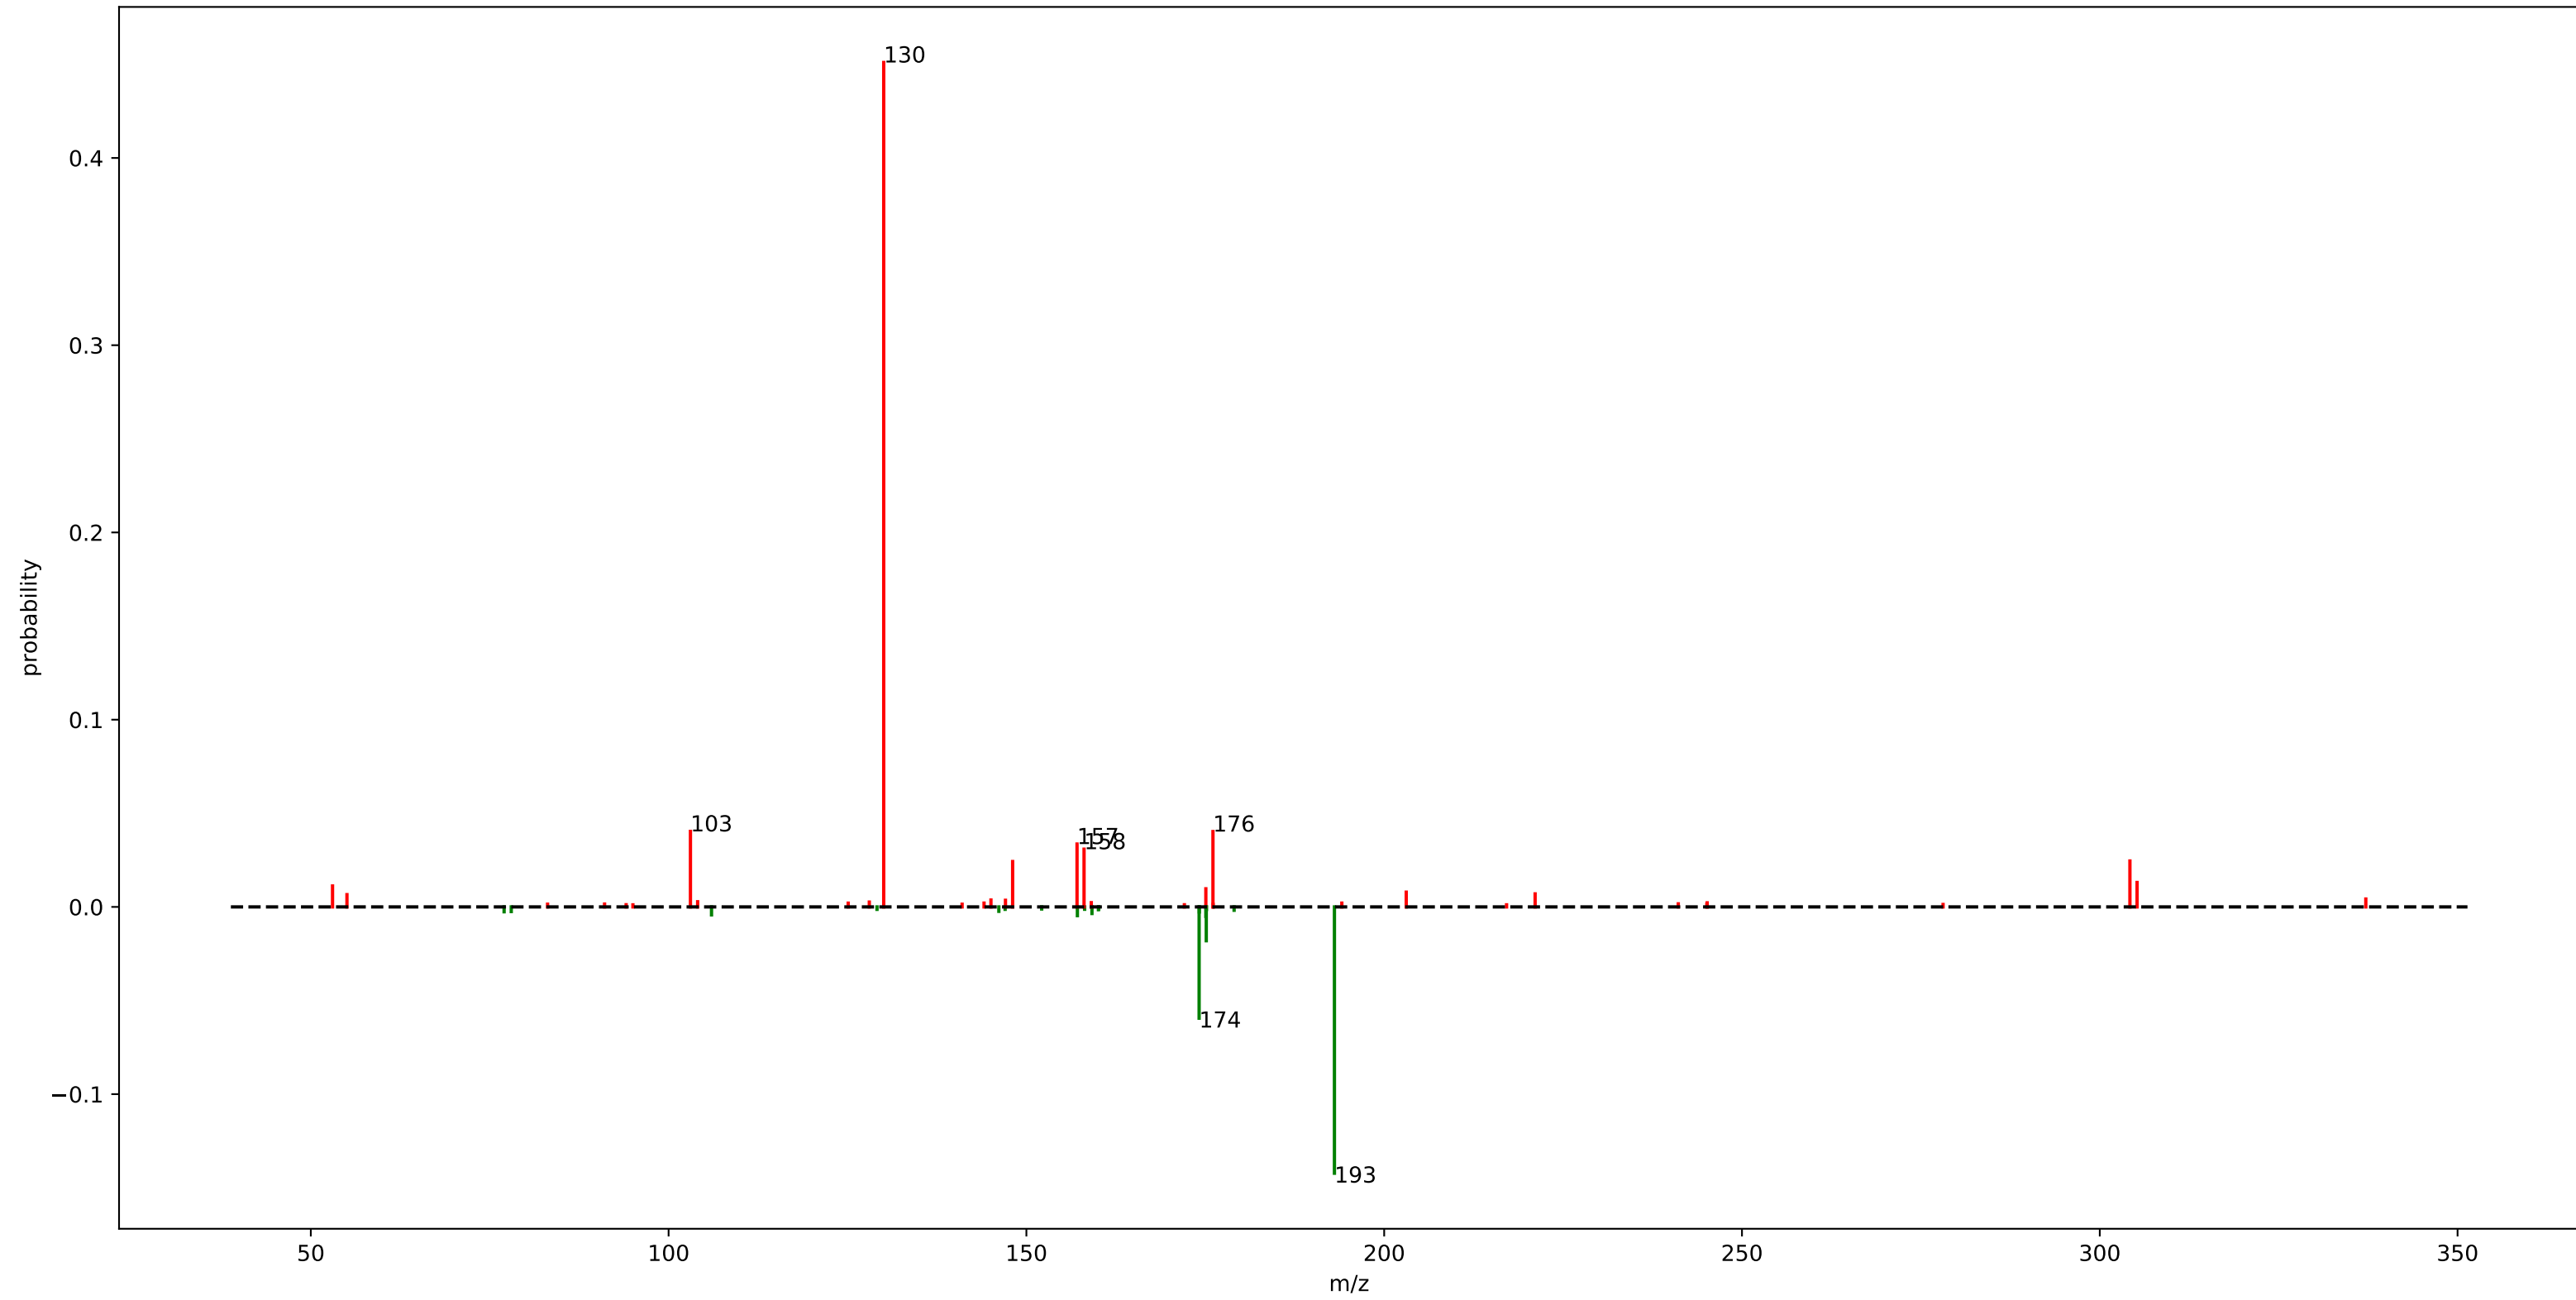

## urine\_mass2motif\_248.m2m

|                   |        |
|-------------------|--------|
| fragment_130.0625 | : 0.45 |
| loss_193.0475     | : 0.14 |
| loss_174.1375     | : 0.06 |
| fragment_103.0525 | : 0.04 |
| fragment_176.0725 | : 0.04 |
| fragment_157.0775 | : 0.03 |
| fragment_158.0575 | : 0.03 |
| fragment_304.2125 | : 0.02 |
| fragment_148.0775 | : 0.02 |
| loss_175.1375     | : 0.02 |
| fragment_305.2125 | : 0.01 |
| fragment_53.0375  | : 0.01 |
| fragment_175.0775 | : 0.01 |
| fragment_203.0825 | : 0.01 |
| fragment_221.0925 | : 0.01 |
| fragment_55.0525  | : 0.01 |
| loss_175.0775     | : 0.01 |

urine\_mass2motif\_241.m2m

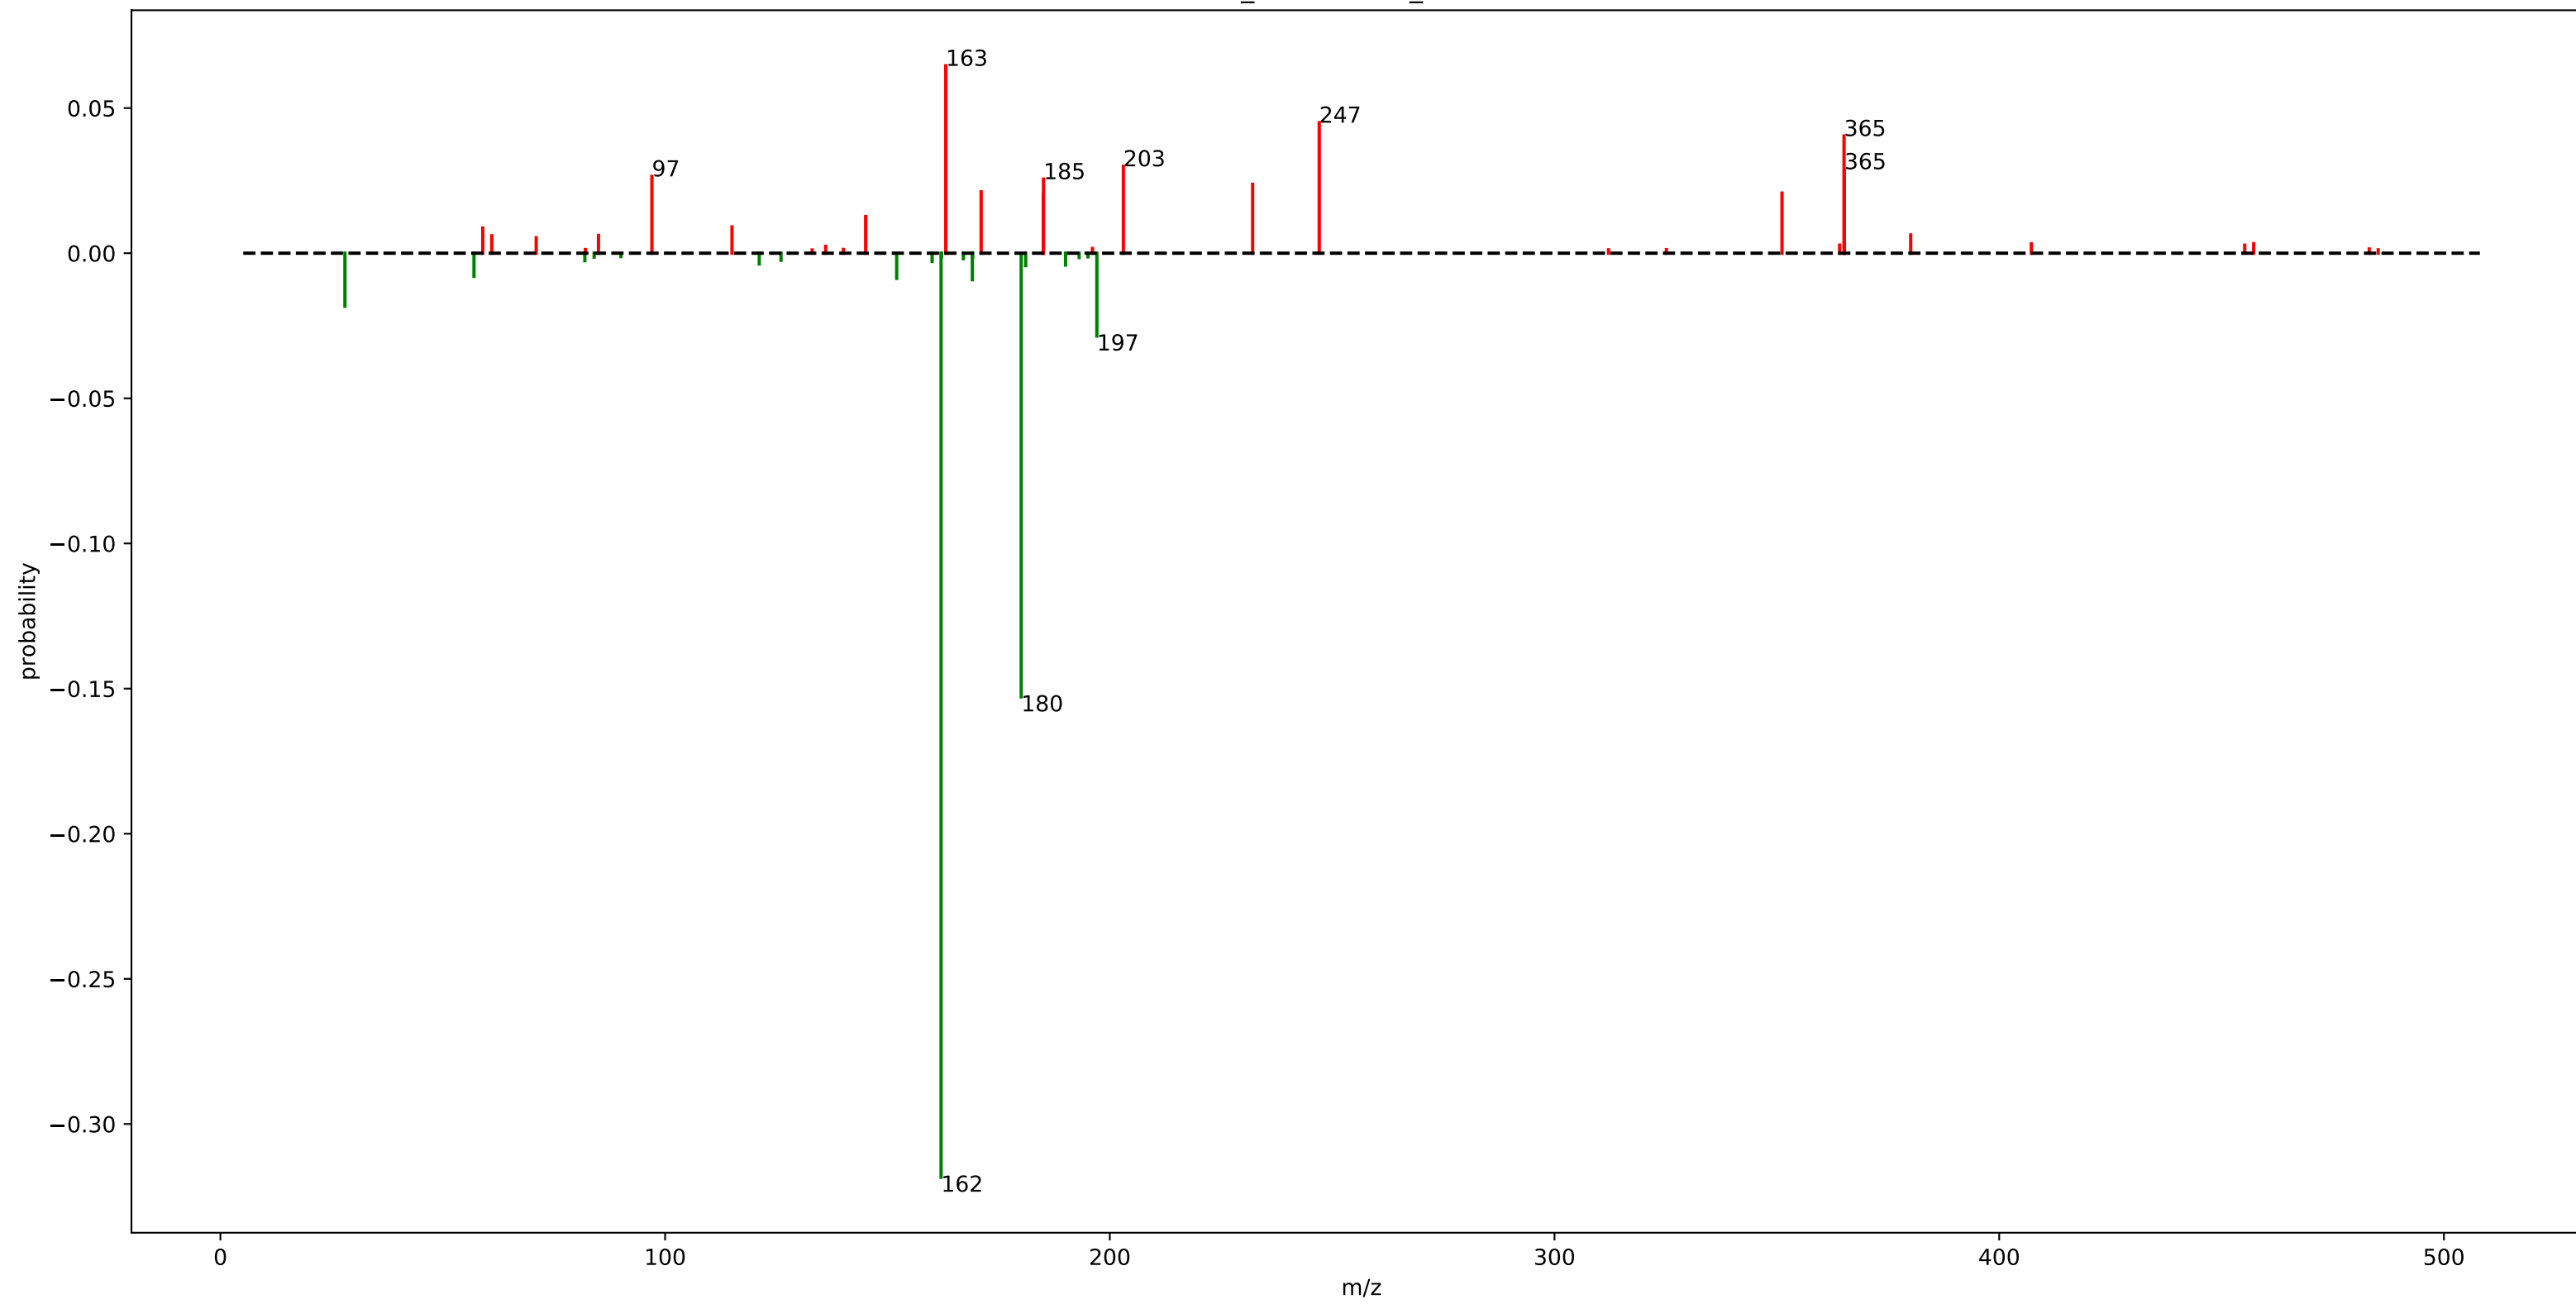

# urine\_mass2motif\_241.m2m

|                   |        |                   |        |
|-------------------|--------|-------------------|--------|
| loss_162.0575     | : 0.32 | loss_57.0225      | : 0.01 |
| loss_180.0775     | : 0.15 | fragment_380.0925 | : 0.01 |
| fragment_163.1125 | : 0.06 | fragment_85.0125  | : 0.01 |
| fragment_247.0925 | : 0.04 | fragment_61.0275  | : 0.01 |
| fragment_365.1075 | : 0.04 | fragment_71.0125  | : 0.01 |
| fragment_203.0525 | : 0.03 |                   |        |
| fragment_365.1725 | : 0.03 |                   |        |
| loss_197.0925     | : 0.03 |                   |        |
| fragment_97.0275  | : 0.03 |                   |        |
| fragment_185.0825 | : 0.03 |                   |        |
| fragment_232.1175 | : 0.02 |                   |        |
| fragment_171.0675 | : 0.02 |                   |        |
| fragment_351.1575 | : 0.02 |                   |        |
| fragment_185.0425 | : 0.02 |                   |        |
| loss_28.0025      | : 0.02 |                   |        |
| fragment_145.0975 | : 0.01 |                   |        |
| loss_169.0925     | : 0.01 |                   |        |
| fragment_115.0375 | : 0.01 |                   |        |
| fragment_58.9975  | : 0.01 |                   |        |
| loss_152.0775     | : 0.01 |                   |        |



urine\_mass2motif\_97.m2m

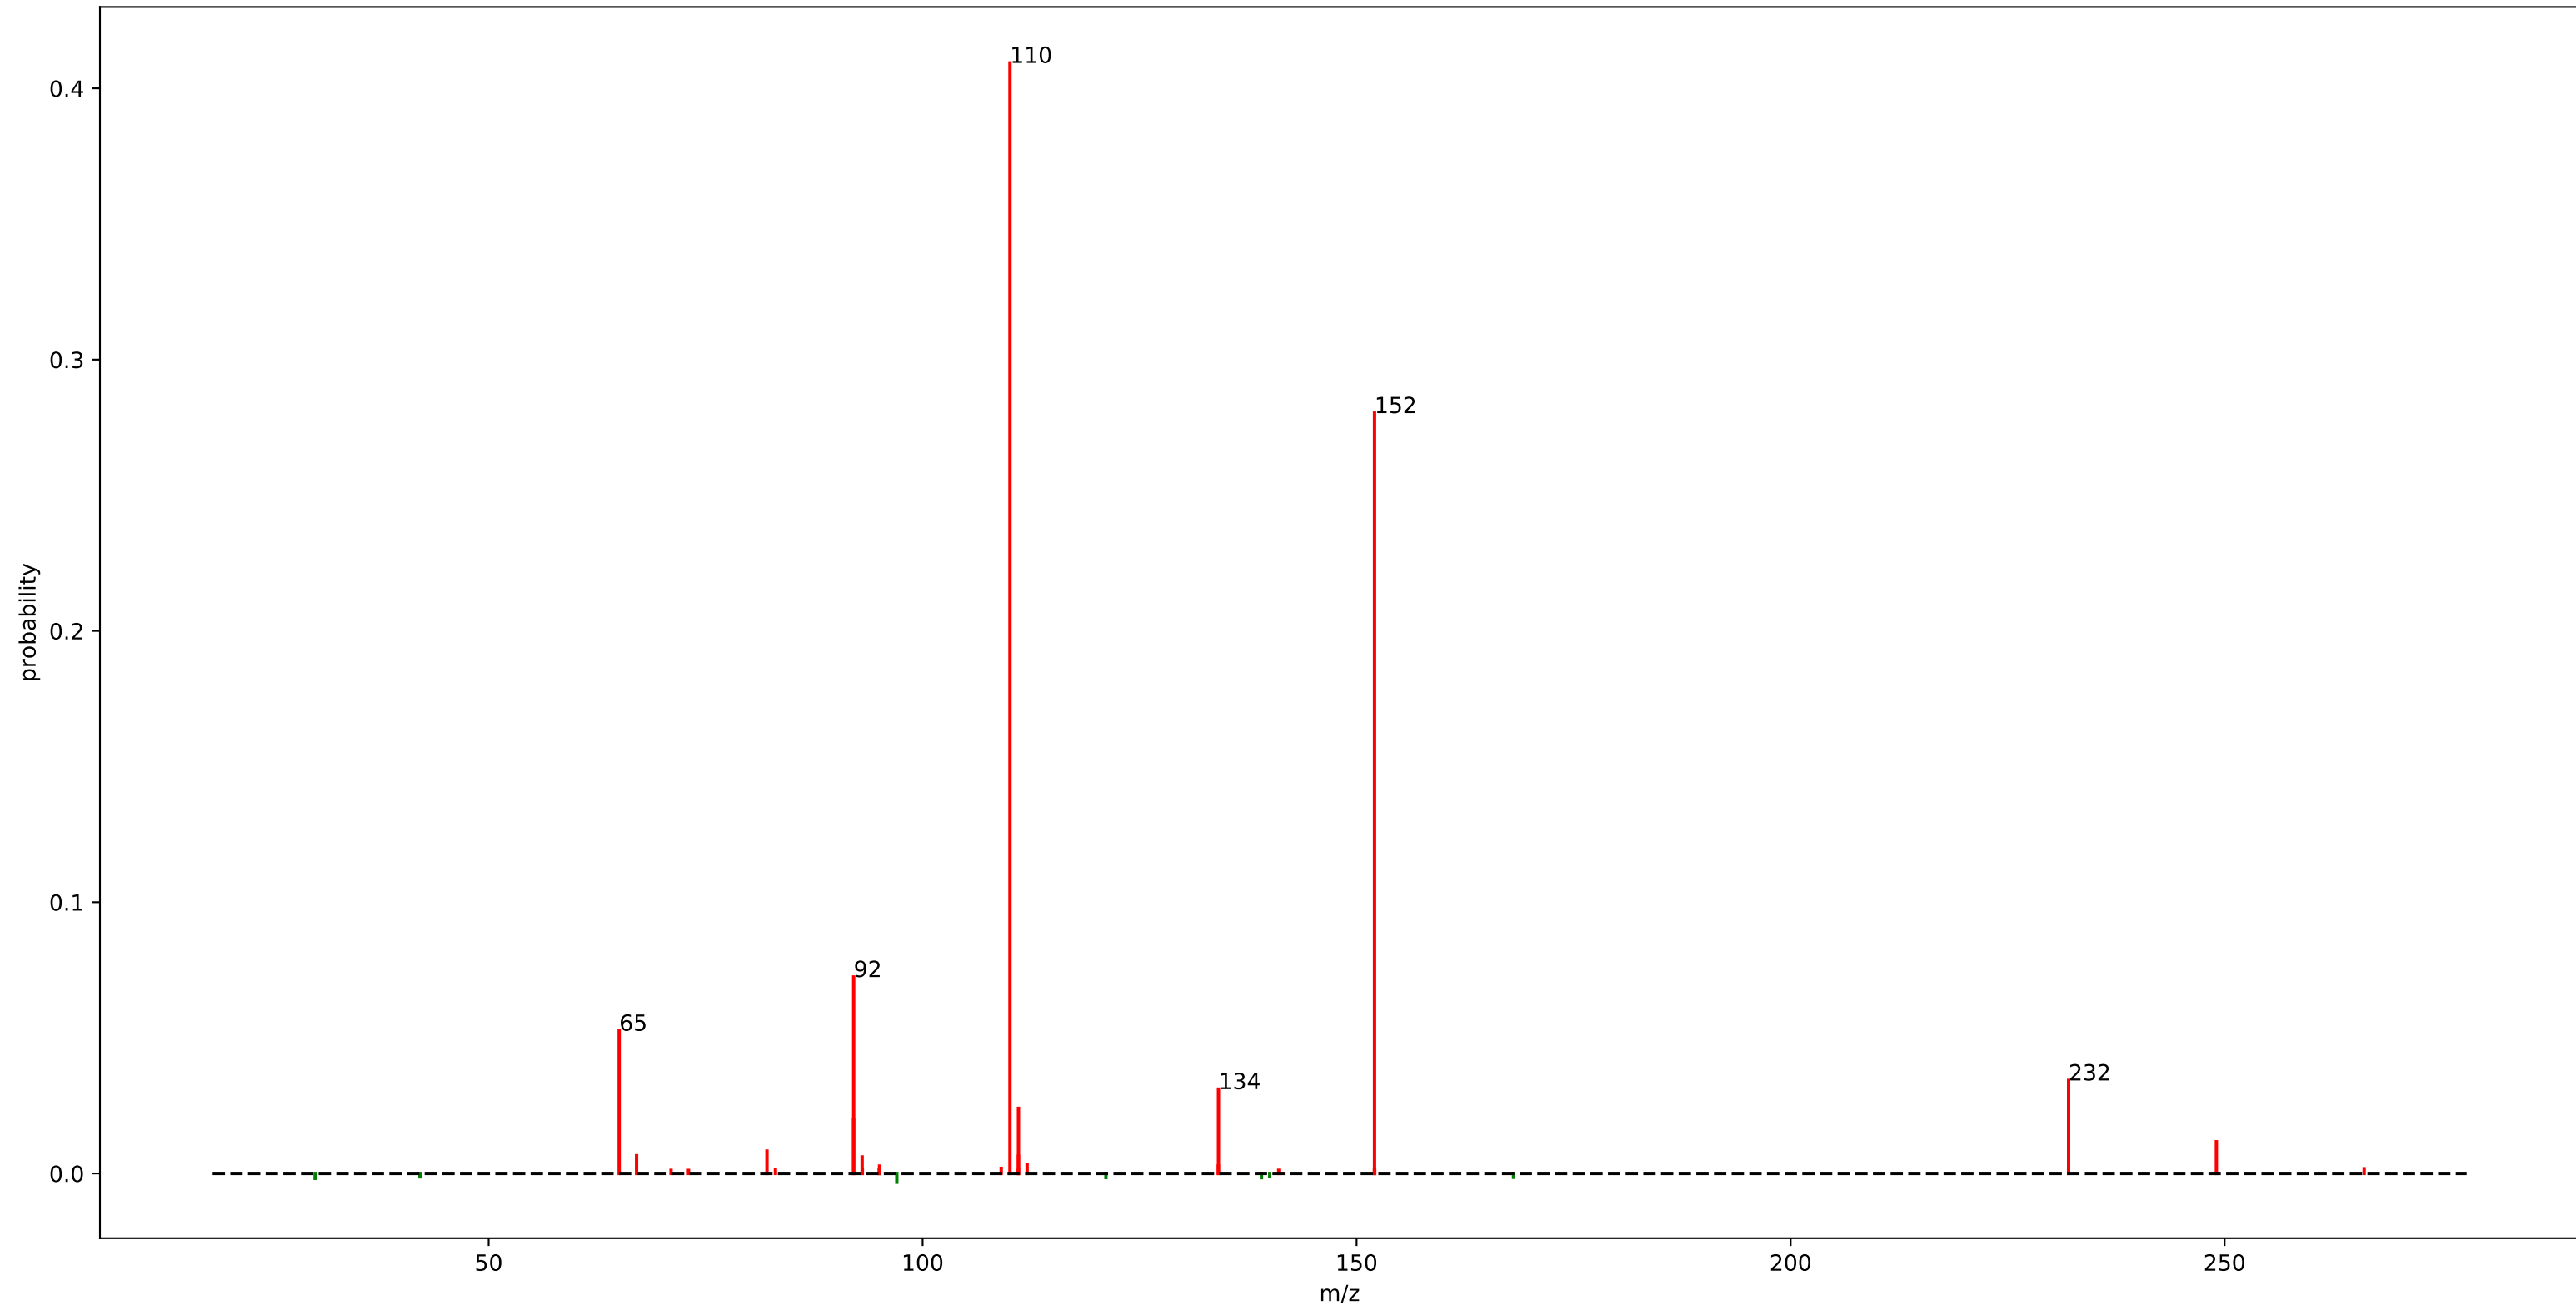

## urine\_mass2motif\_97.m2m

|                   |        |
|-------------------|--------|
| fragment_110.0625 | : 0.41 |
| fragment_152.0675 | : 0.28 |
| fragment_92.0575  | : 0.07 |
| fragment_65.0375  | : 0.05 |
| fragment_232.0275 | : 0.03 |
| fragment_134.0825 | : 0.03 |
| fragment_111.0425 | : 0.02 |
| fragment_92.0475  | : 0.02 |
| fragment_249.0525 | : 0.01 |
| fragment_82.0675  | : 0.01 |
| fragment_67.0425  | : 0.01 |
| fragment_111.0375 | : 0.01 |
| fragment_93.0325  | : 0.01 |

urine\_mass2motif\_240.m2m

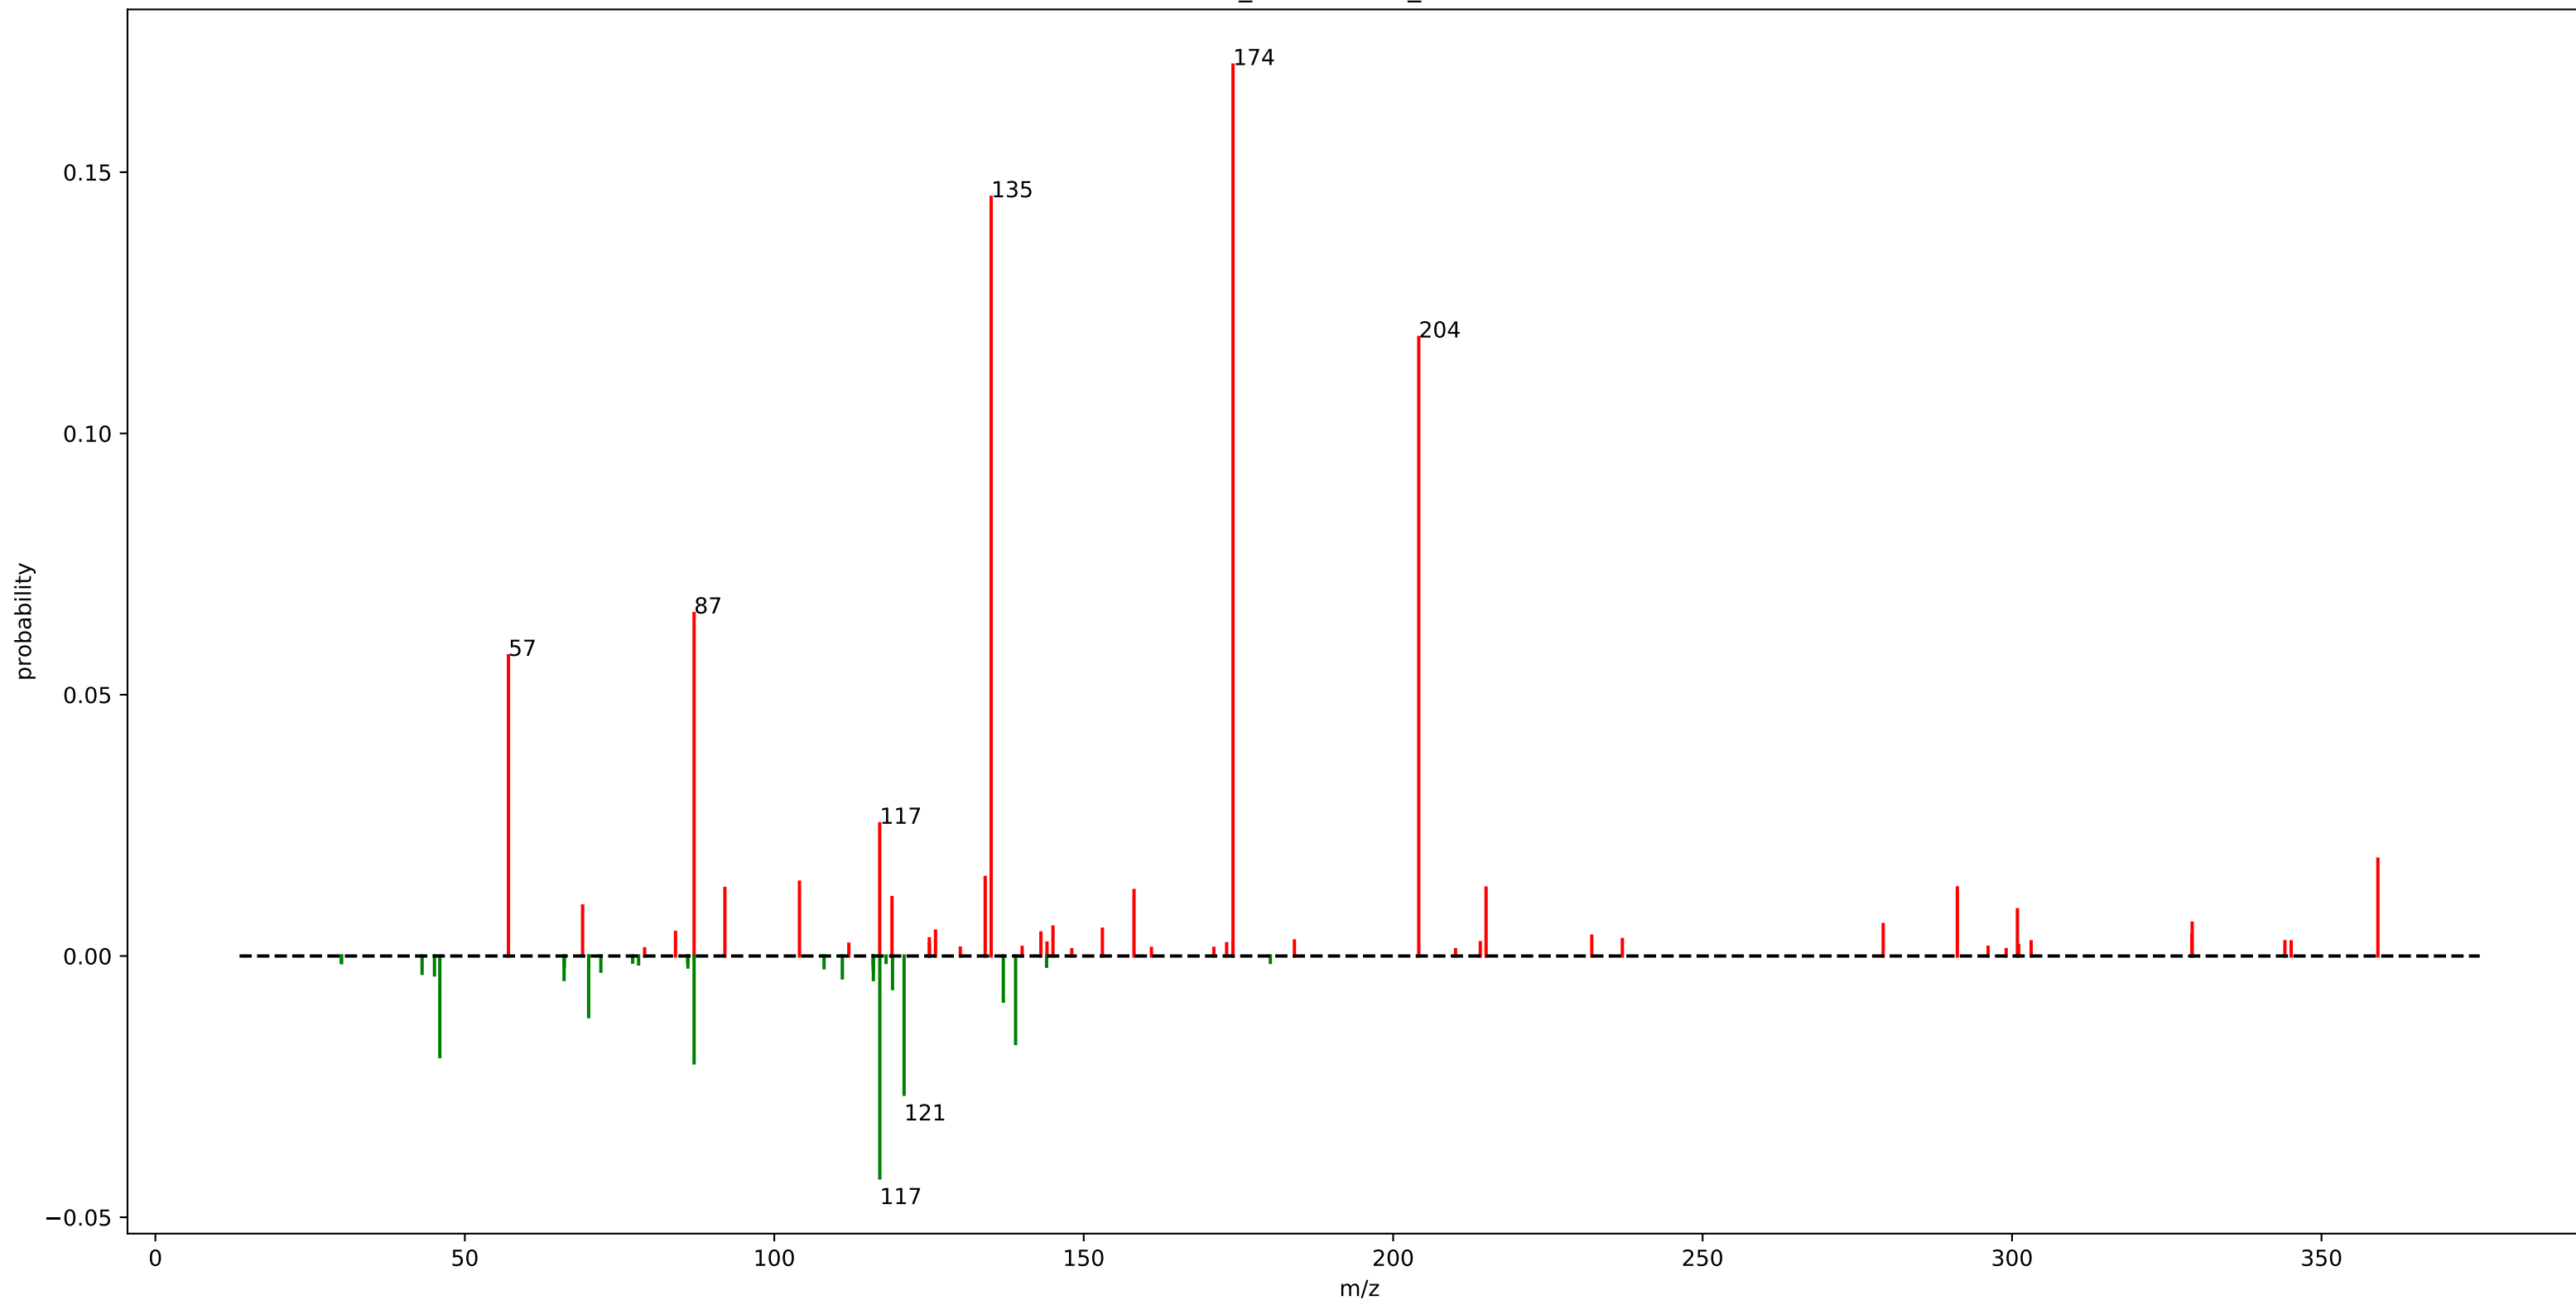

# urine\_mass2motif\_240.m2m

|                   |        |                   |        |
|-------------------|--------|-------------------|--------|
| fragment_174.1225 | : 0.17 | fragment_69.0325  | : 0.01 |
| fragment_135.0475 | : 0.15 | fragment_300.8675 | : 0.01 |
| fragment_204.1375 | : 0.12 | loss_137.0125     | : 0.01 |
| fragment_87.0425  | : 0.07 | fragment_329.1025 | : 0.01 |
| fragment_57.0475  | : 0.06 | loss_119.1075     | : 0.01 |
| loss_117.0525     | : 0.04 | fragment_279.1775 | : 0.01 |
| loss_120.9775     | : 0.03 | fragment_145.0325 | : 0.01 |
| fragment_117.0375 | : 0.03 | fragment_153.0175 | : 0.01 |
| loss_87.0425      | : 0.02 |                   |        |
| loss_45.9575      | : 0.02 |                   |        |
| fragment_359.1125 | : 0.02 |                   |        |
| loss_138.9925     | : 0.02 |                   |        |
| fragment_134.0825 | : 0.02 |                   |        |
| fragment_104.0725 | : 0.01 |                   |        |
| fragment_291.1625 | : 0.01 |                   |        |
| fragment_215.0125 | : 0.01 |                   |        |
| fragment_92.0225  | : 0.01 |                   |        |
| fragment_158.1275 | : 0.01 |                   |        |
| loss_70.0075      | : 0.01 |                   |        |
| fragment_119.0175 | : 0.01 |                   |        |

urine\_mass2motif\_29.m2m

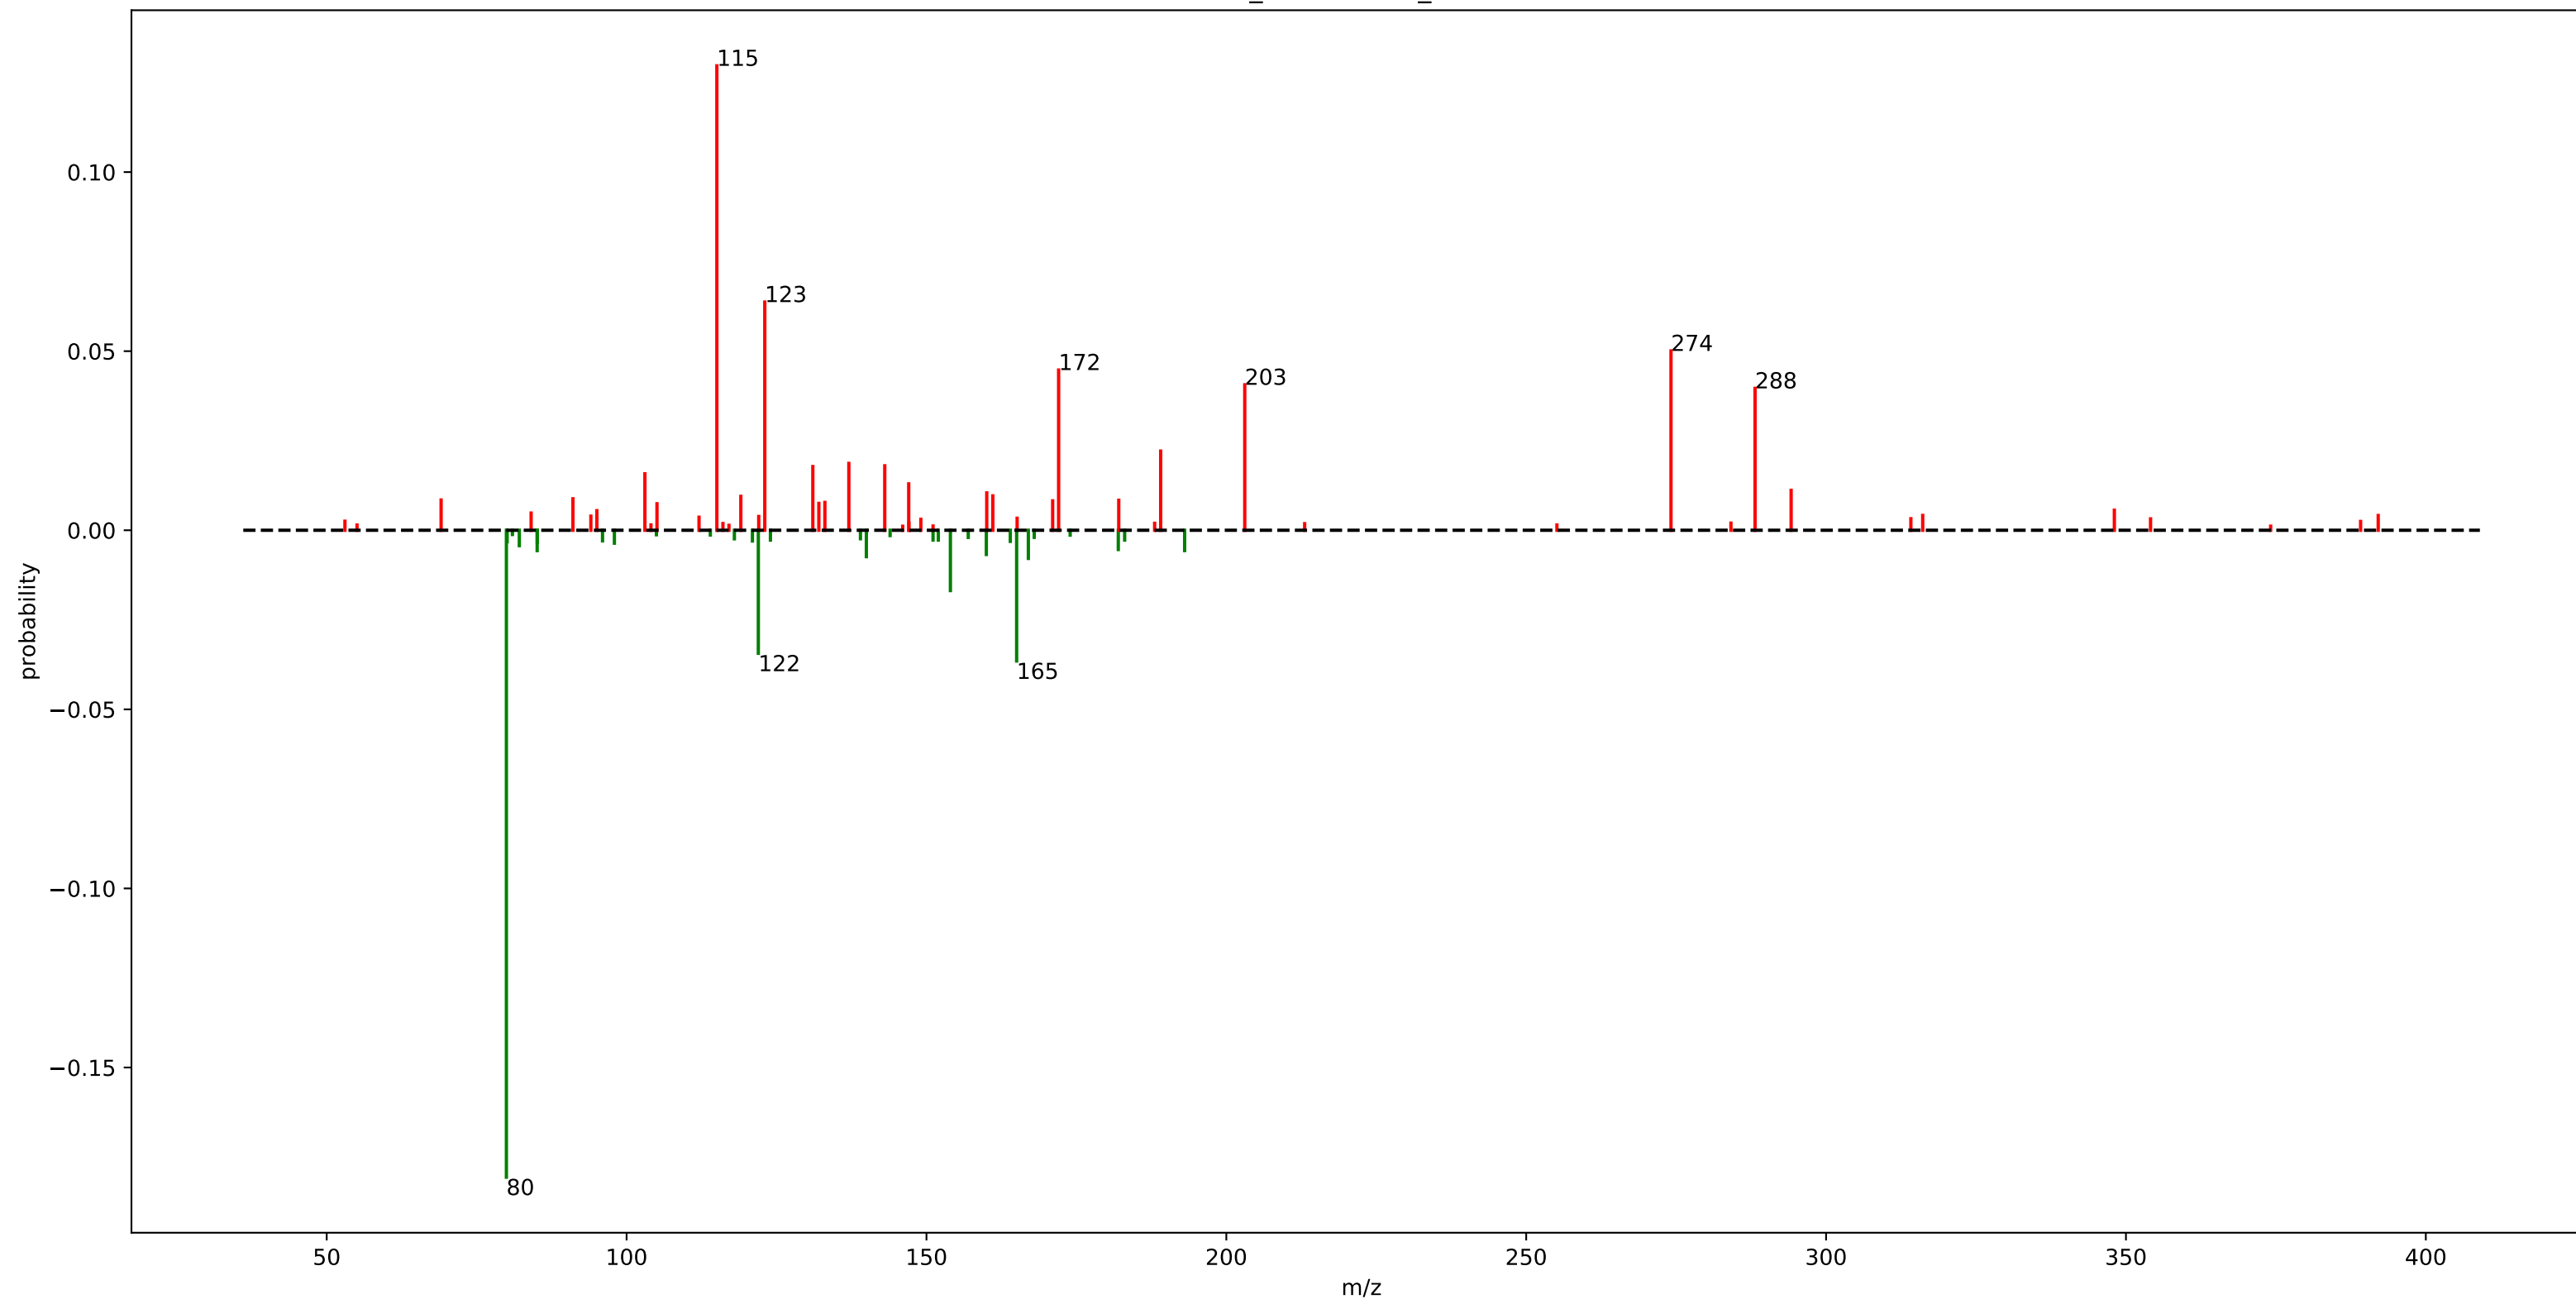

# urine\_mass2motif\_29.m2m

|                   |        |                   |        |
|-------------------|--------|-------------------|--------|
| loss_79.9575      | : 0.18 | fragment_91.0525  | : 0.01 |
| fragment_115.0525 | : 0.13 | fragment_69.0725  | : 0.01 |
| fragment_123.0425 | : 0.06 | fragment_182.0625 | : 0.01 |
| fragment_274.1425 | : 0.05 | fragment_171.0425 | : 0.01 |
| fragment_172.0375 | : 0.04 | loss_166.9875     | : 0.01 |
| fragment_203.0725 | : 0.04 | fragment_133.0625 | : 0.01 |
| fragment_288.1575 | : 0.04 | fragment_132.0575 | : 0.01 |
| loss_165.0375     | : 0.04 | fragment_105.0675 | : 0.01 |
| loss_121.9675     | : 0.03 | loss_139.9775     | : 0.01 |
| fragment_189.0525 | : 0.02 | loss_159.9825     | : 0.01 |
| fragment_137.0575 | : 0.02 | loss_85.0875      | : 0.01 |
| fragment_143.0475 | : 0.02 | loss_193.0475     | : 0.01 |
| fragment_131.0525 | : 0.02 | fragment_348.0675 | : 0.01 |
| loss_153.9925     | : 0.02 | fragment_95.0475  | : 0.01 |
| fragment_103.0525 | : 0.02 | loss_181.9875     | : 0.01 |
| fragment_147.0425 | : 0.01 |                   |        |
| fragment_294.1725 | : 0.01 |                   |        |
| fragment_160.0525 | : 0.01 |                   |        |
| fragment_161.0625 | : 0.01 |                   |        |
| fragment_119.0475 | : 0.01 |                   |        |

motif\_422

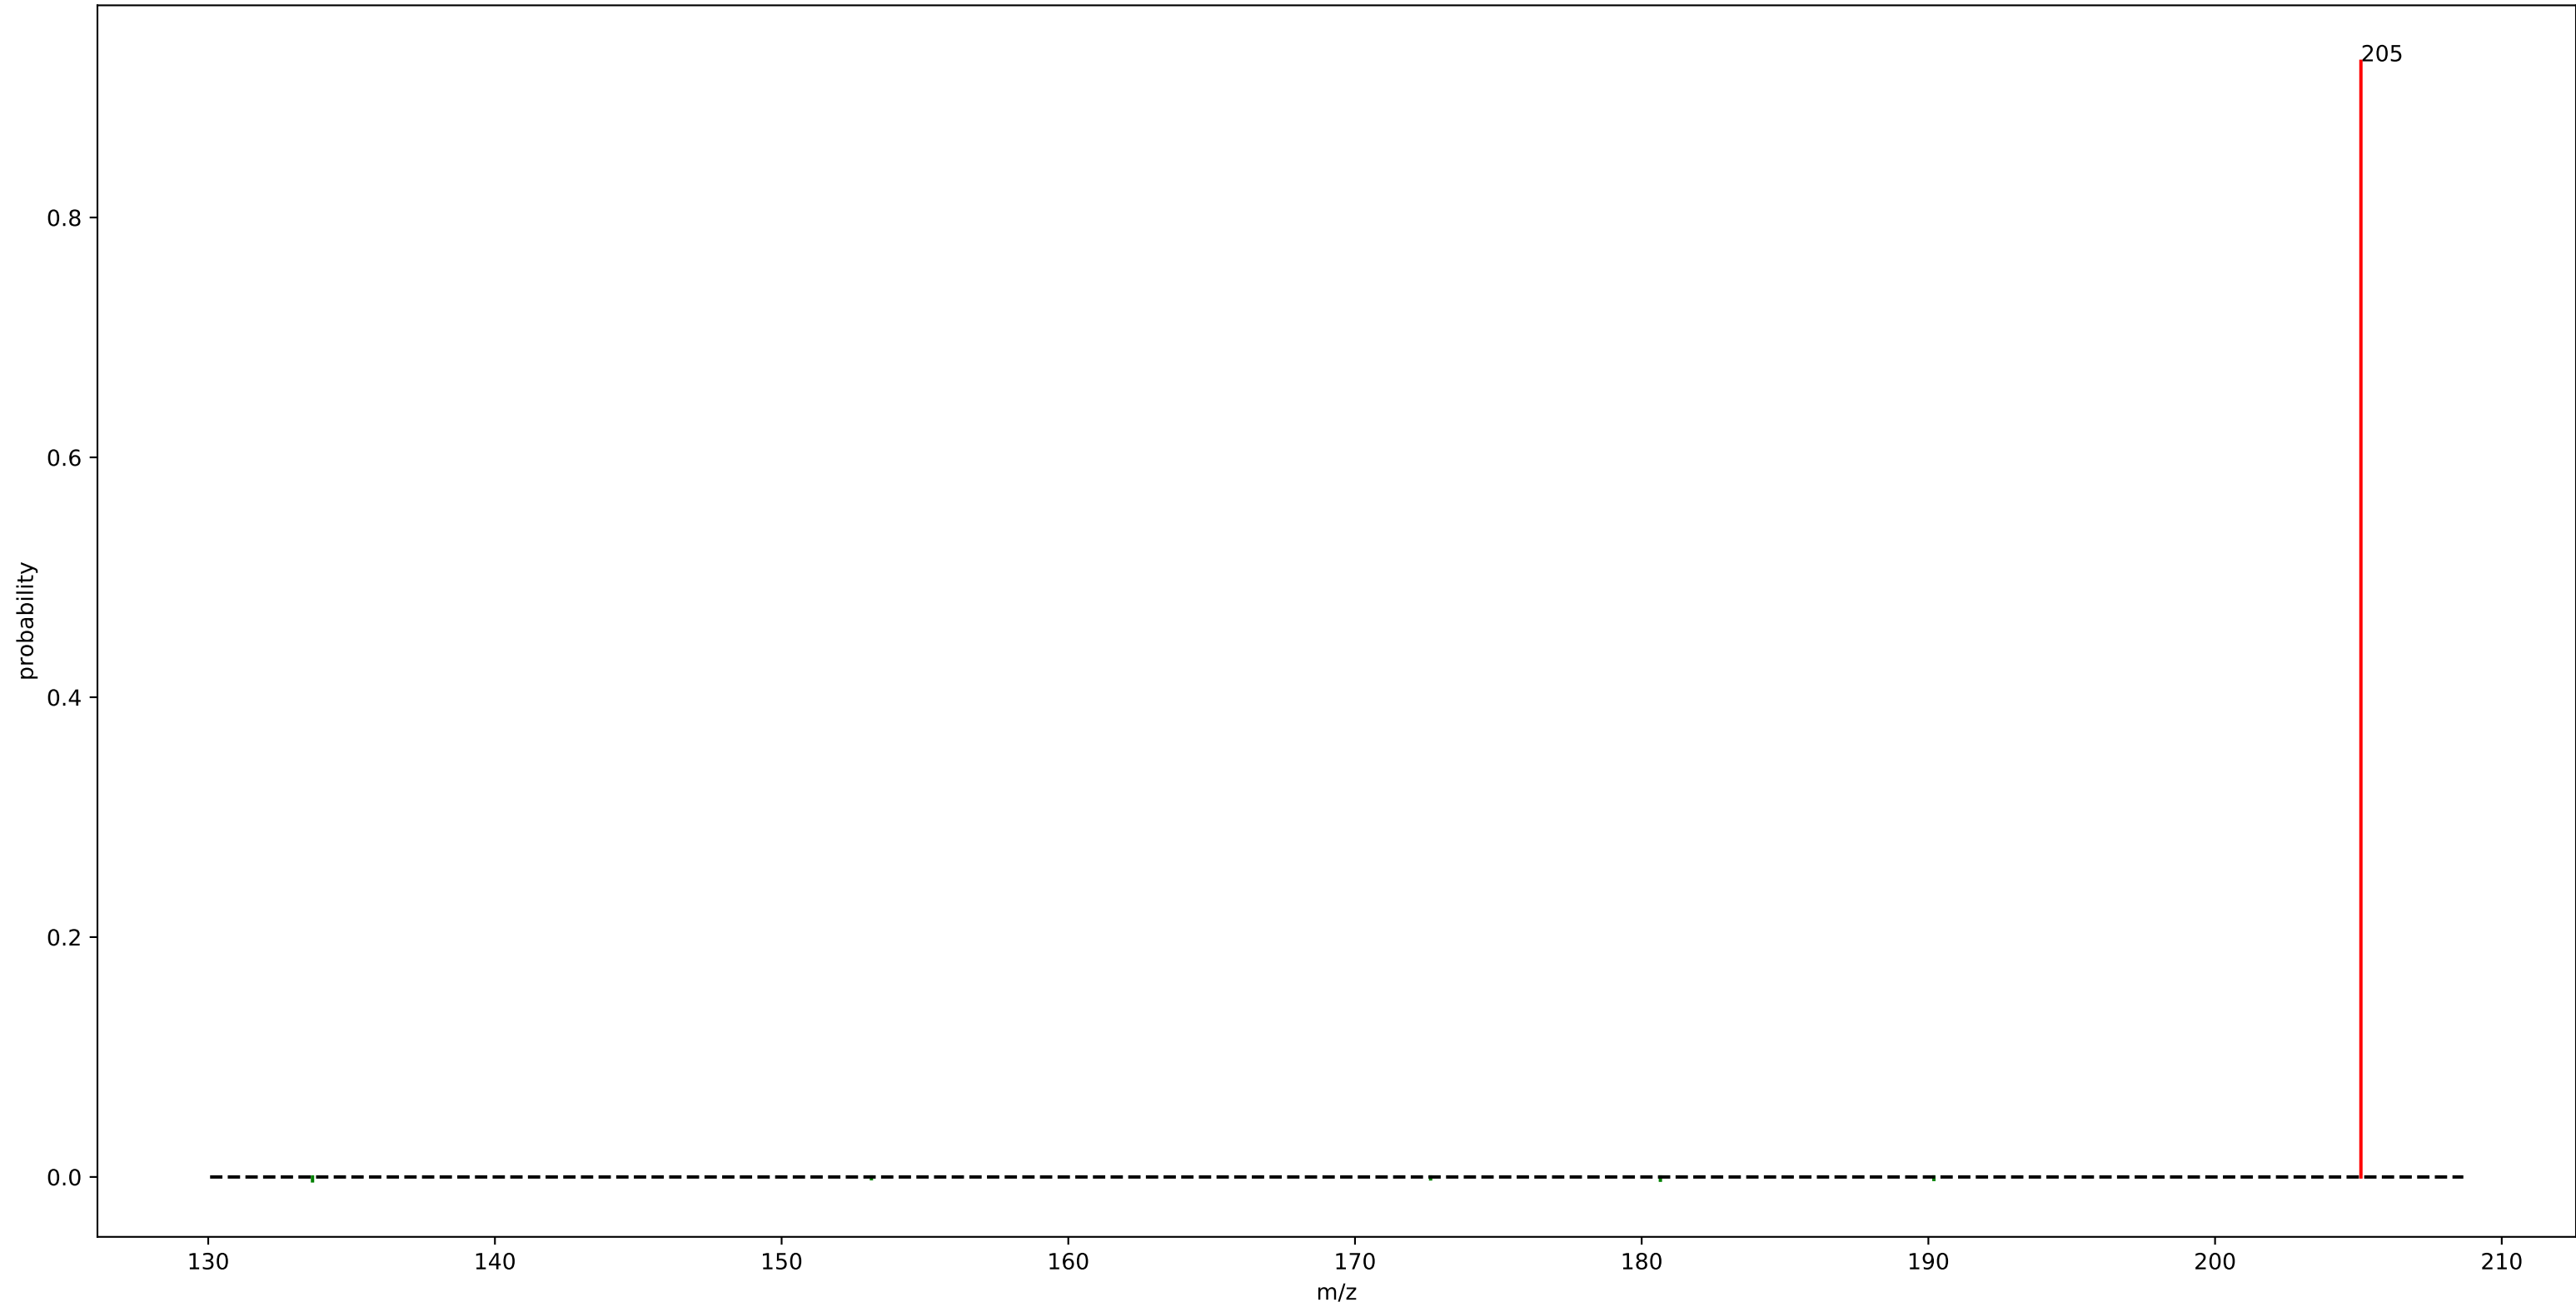

## motif\_422

fragment\_205.0875 : 0.93



gnps\_motif\_35.m2m

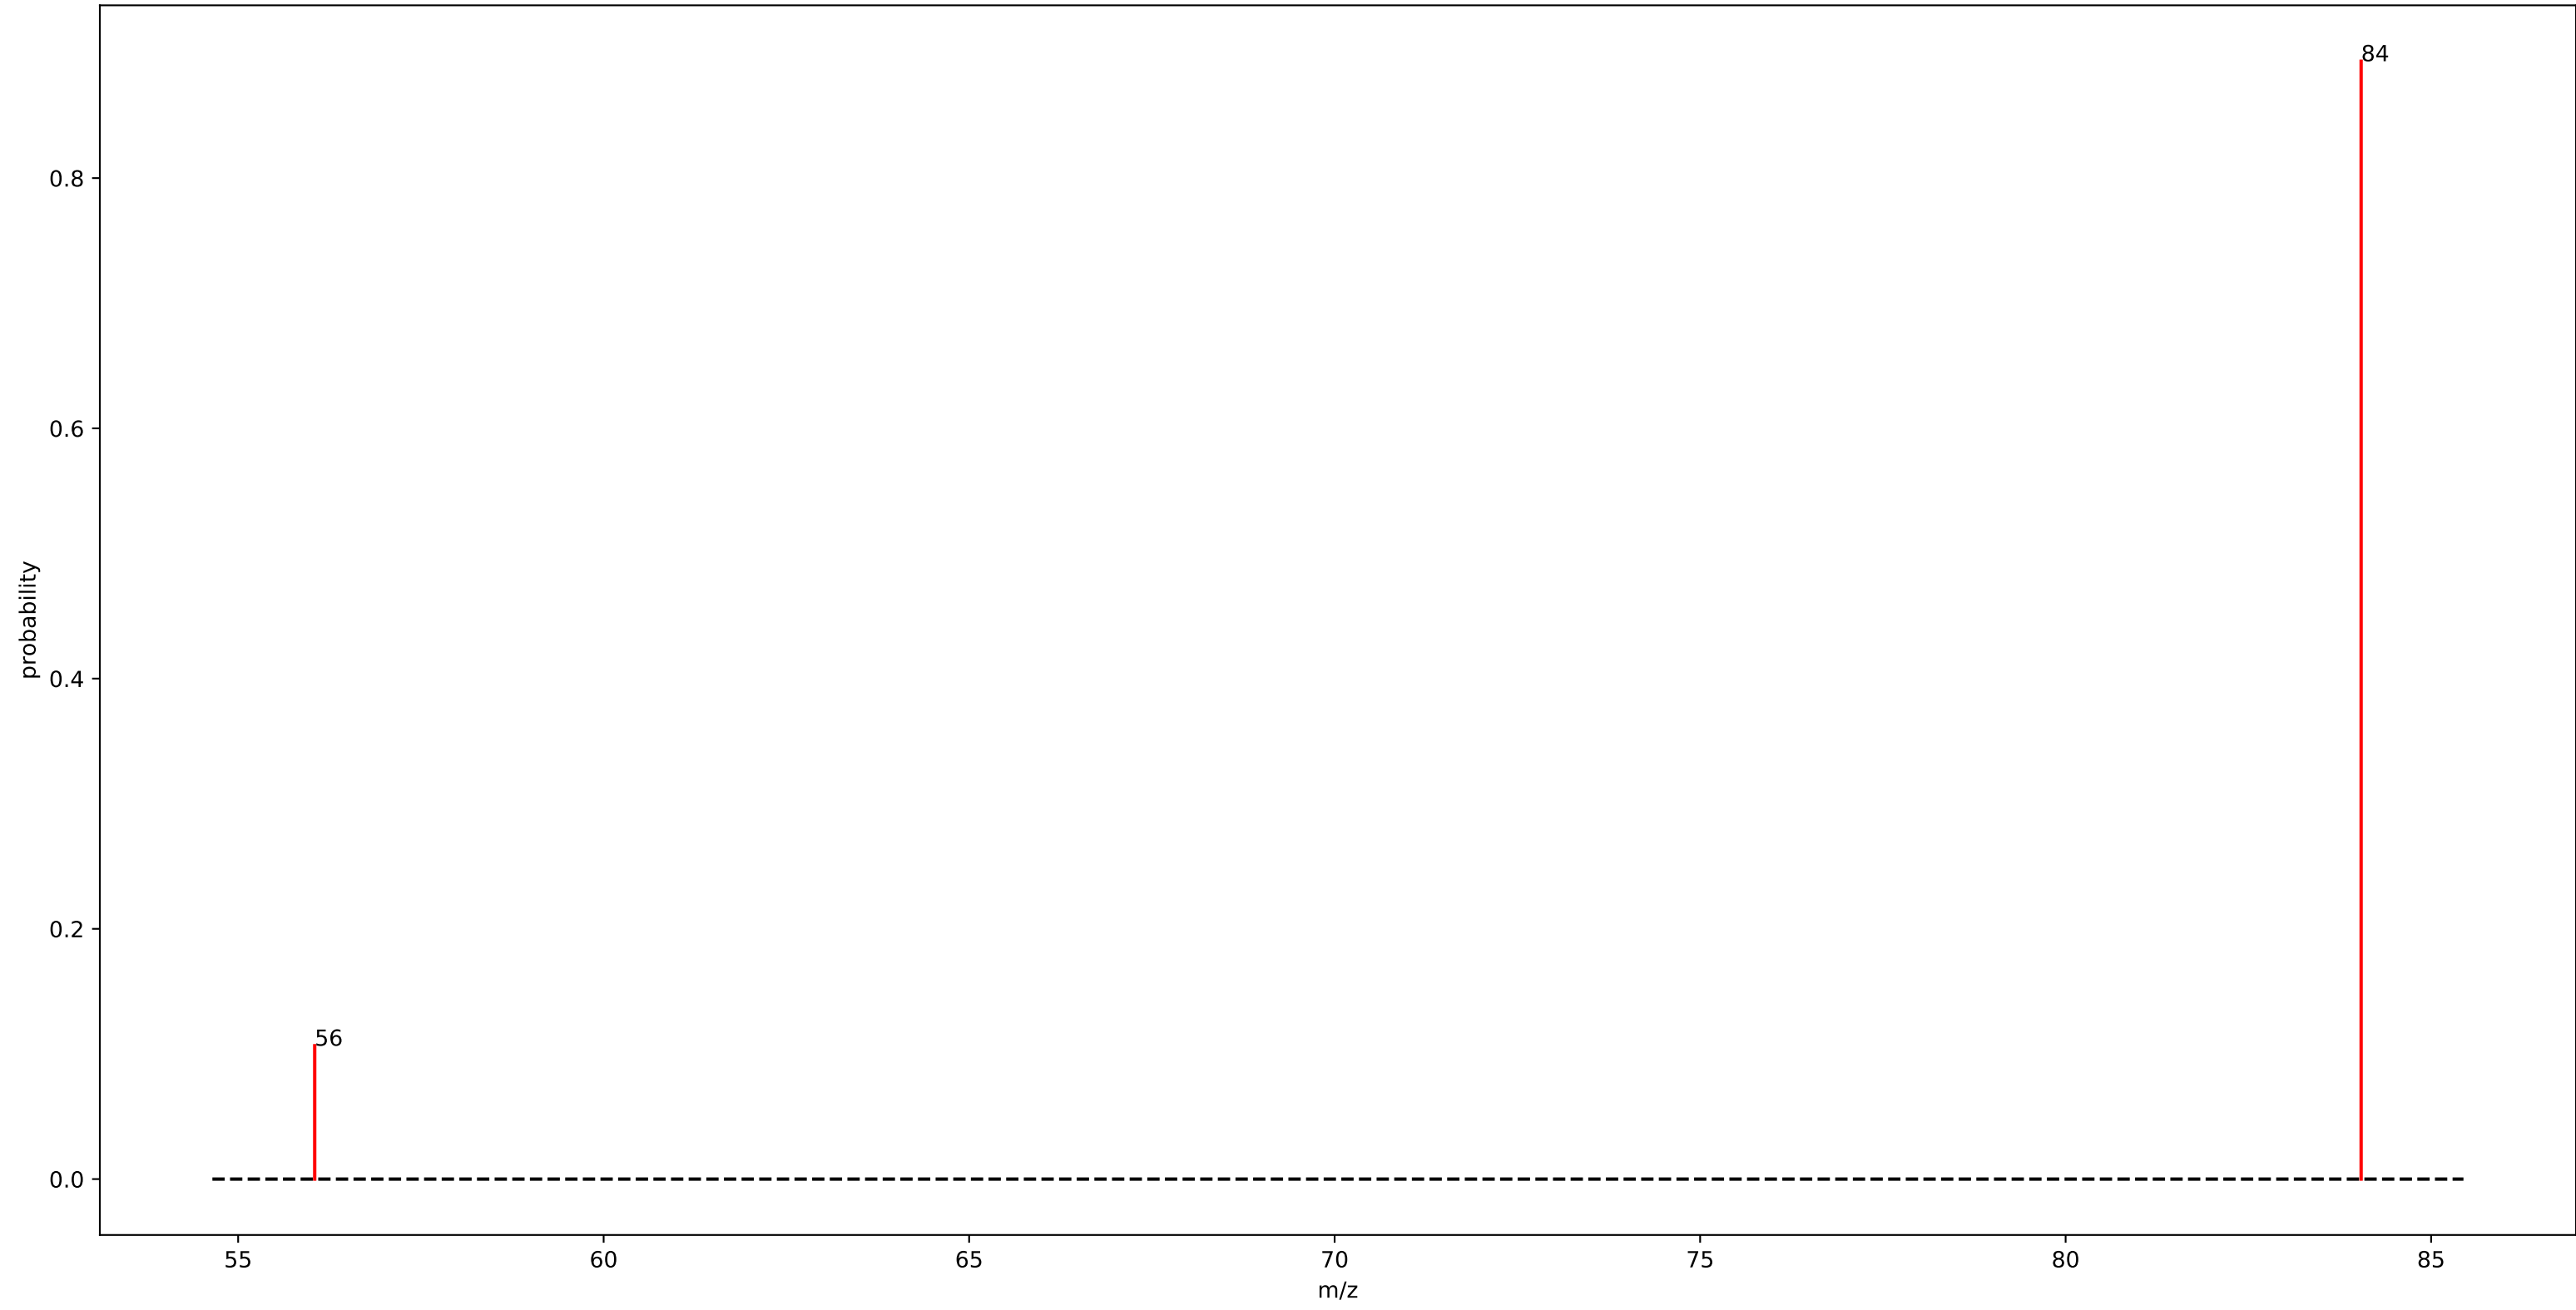

## gnps\_motif\_35.m2m

fragment\_84.0425 : 0.89  
fragment\_56.0475 : 0.11

StrepSalini\_motif\_289.m2m

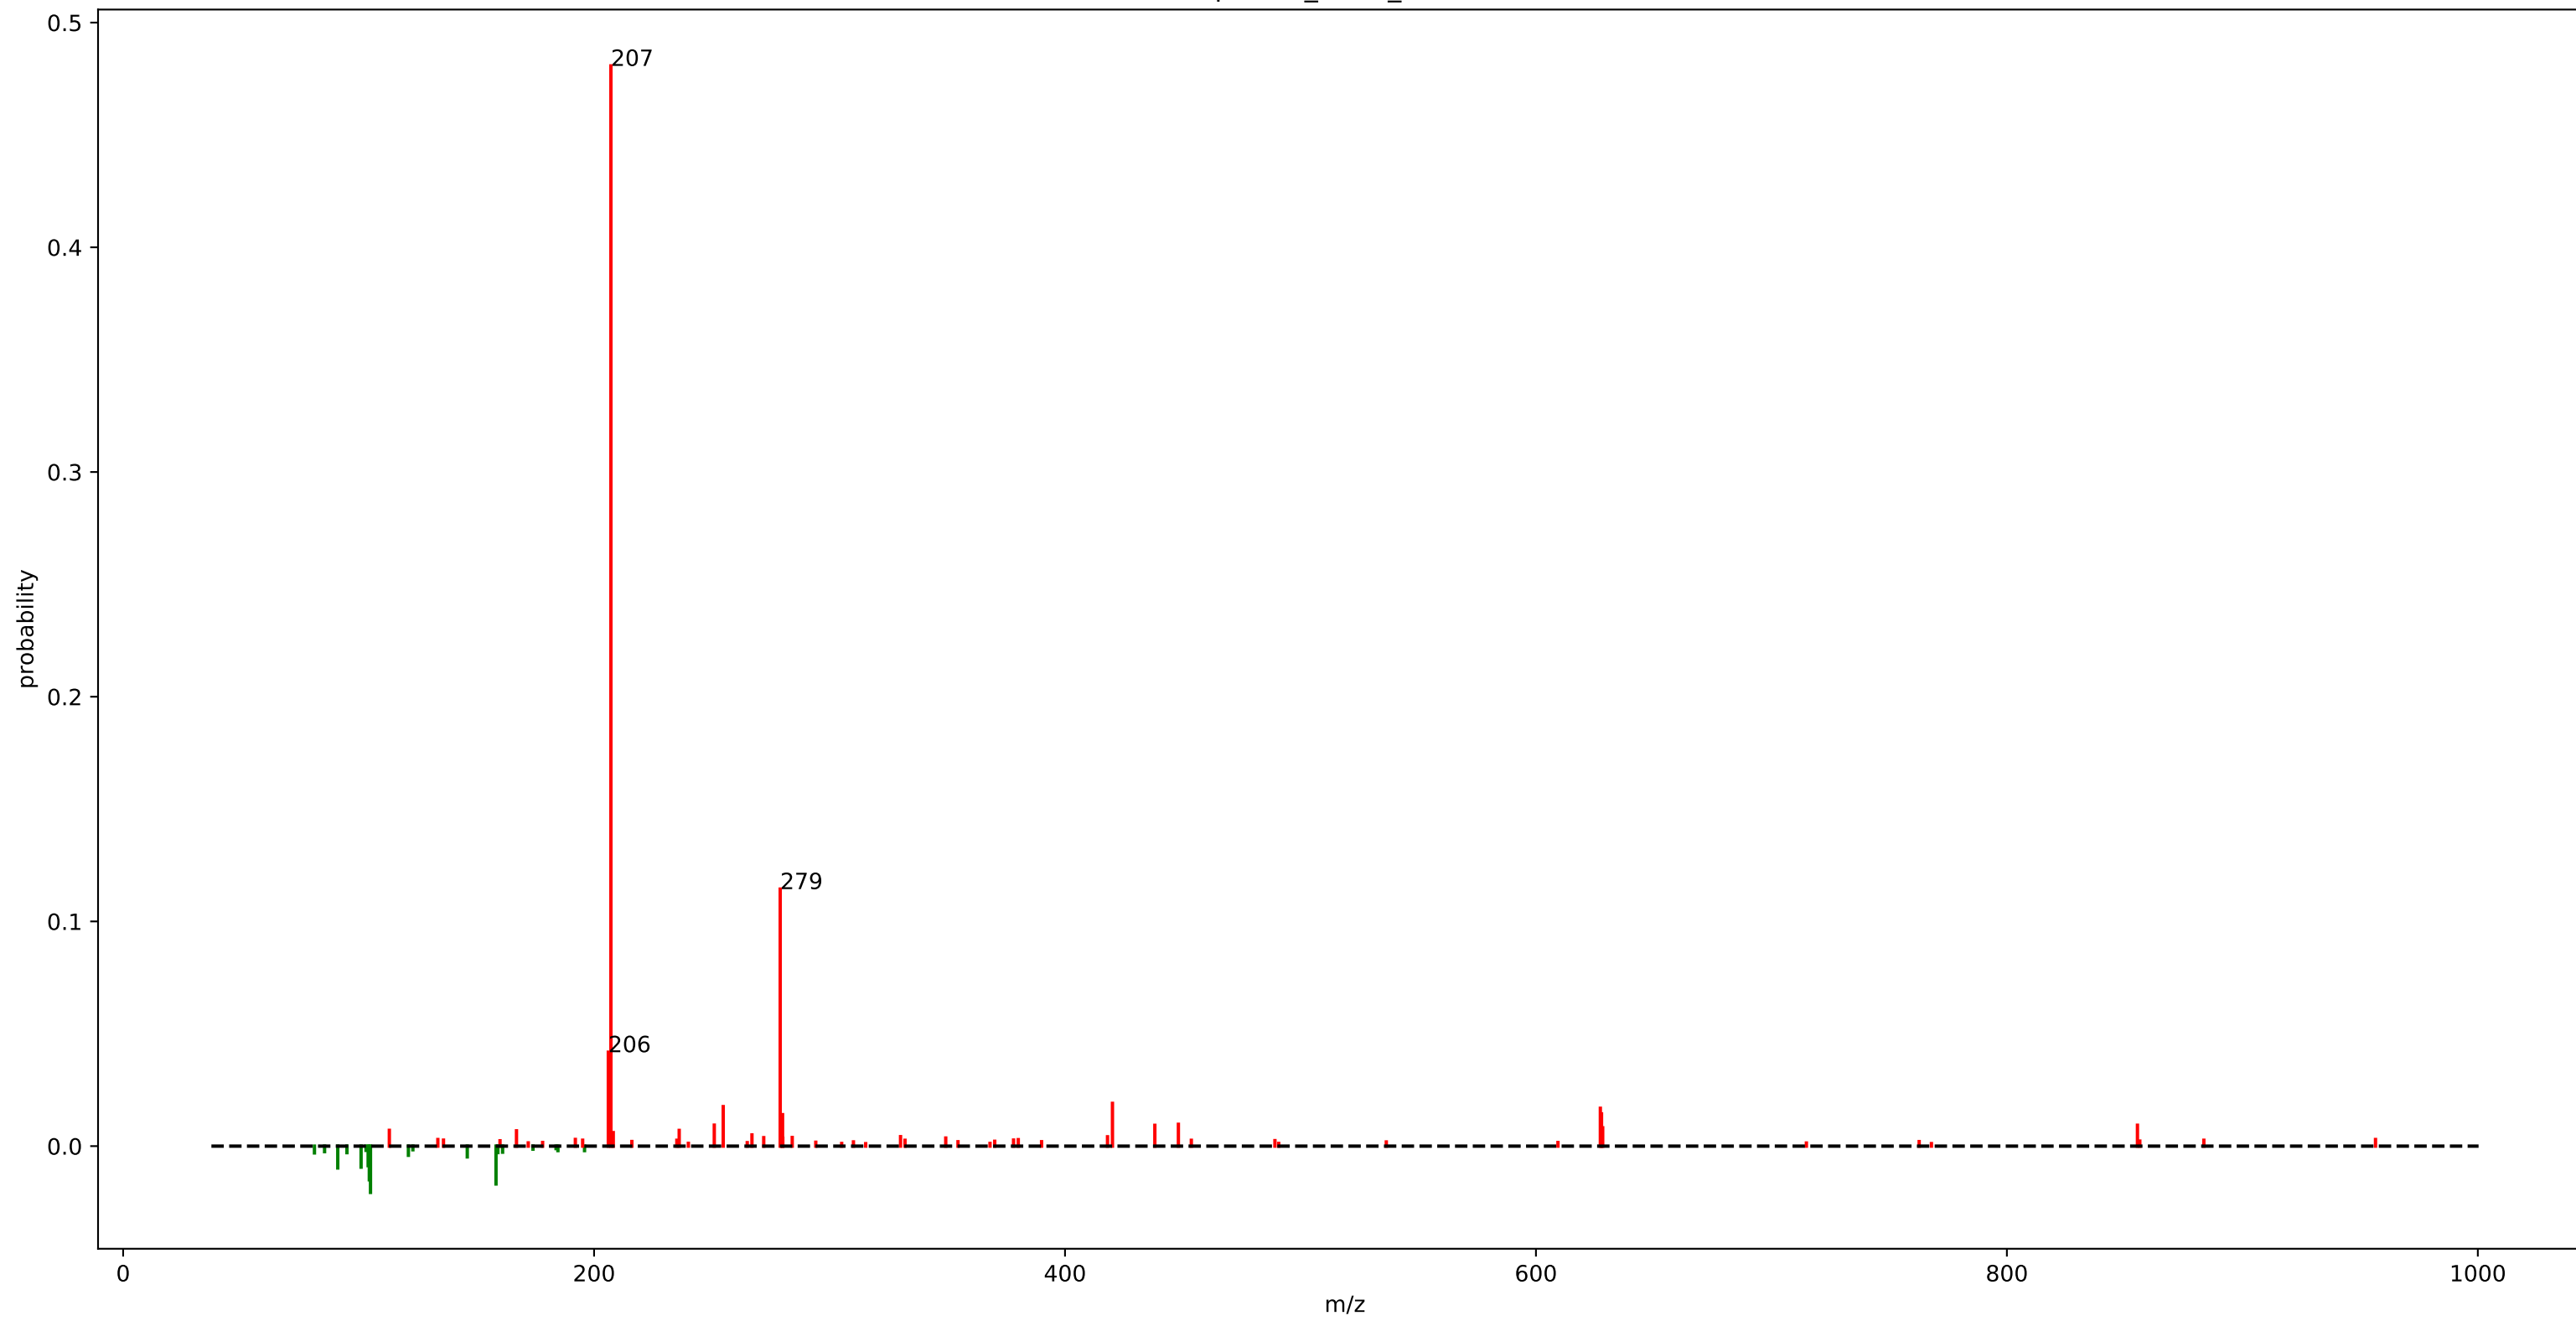

## StrepSalini\_motif\_289.m2m

|                   |        |                   |        |
|-------------------|--------|-------------------|--------|
| fragment_207.1500 | : 0.48 | fragment_236.1500 | : 0.01 |
| fragment_279.0500 | : 0.11 | fragment_167.0500 | : 0.01 |
| fragment_206.0500 | : 0.04 | fragment_208.1500 | : 0.01 |
| loss_105.0500     | : 0.02 |                   |        |
| fragment_420.1500 | : 0.02 |                   |        |
| fragment_254.8500 | : 0.02 |                   |        |
| loss_158.3500     | : 0.02 |                   |        |
| fragment_627.3500 | : 0.02 |                   |        |
| loss_104.5500     | : 0.01 |                   |        |
| fragment_627.8500 | : 0.01 |                   |        |
| fragment_280.0500 | : 0.01 |                   |        |
| loss_91.1500      | : 0.01 |                   |        |
| fragment_448.1500 | : 0.01 |                   |        |
| loss_101.0500     | : 0.01 |                   |        |
| fragment_251.0500 | : 0.01 |                   |        |
| fragment_855.4500 | : 0.01 |                   |        |
| fragment_438.1500 | : 0.01 |                   |        |
| loss_104.0500     | : 0.01 |                   |        |
| fragment_628.3500 | : 0.01 |                   |        |
| fragment_113.0500 | : 0.01 |                   |        |

urine\_mass2motif\_128.m2m

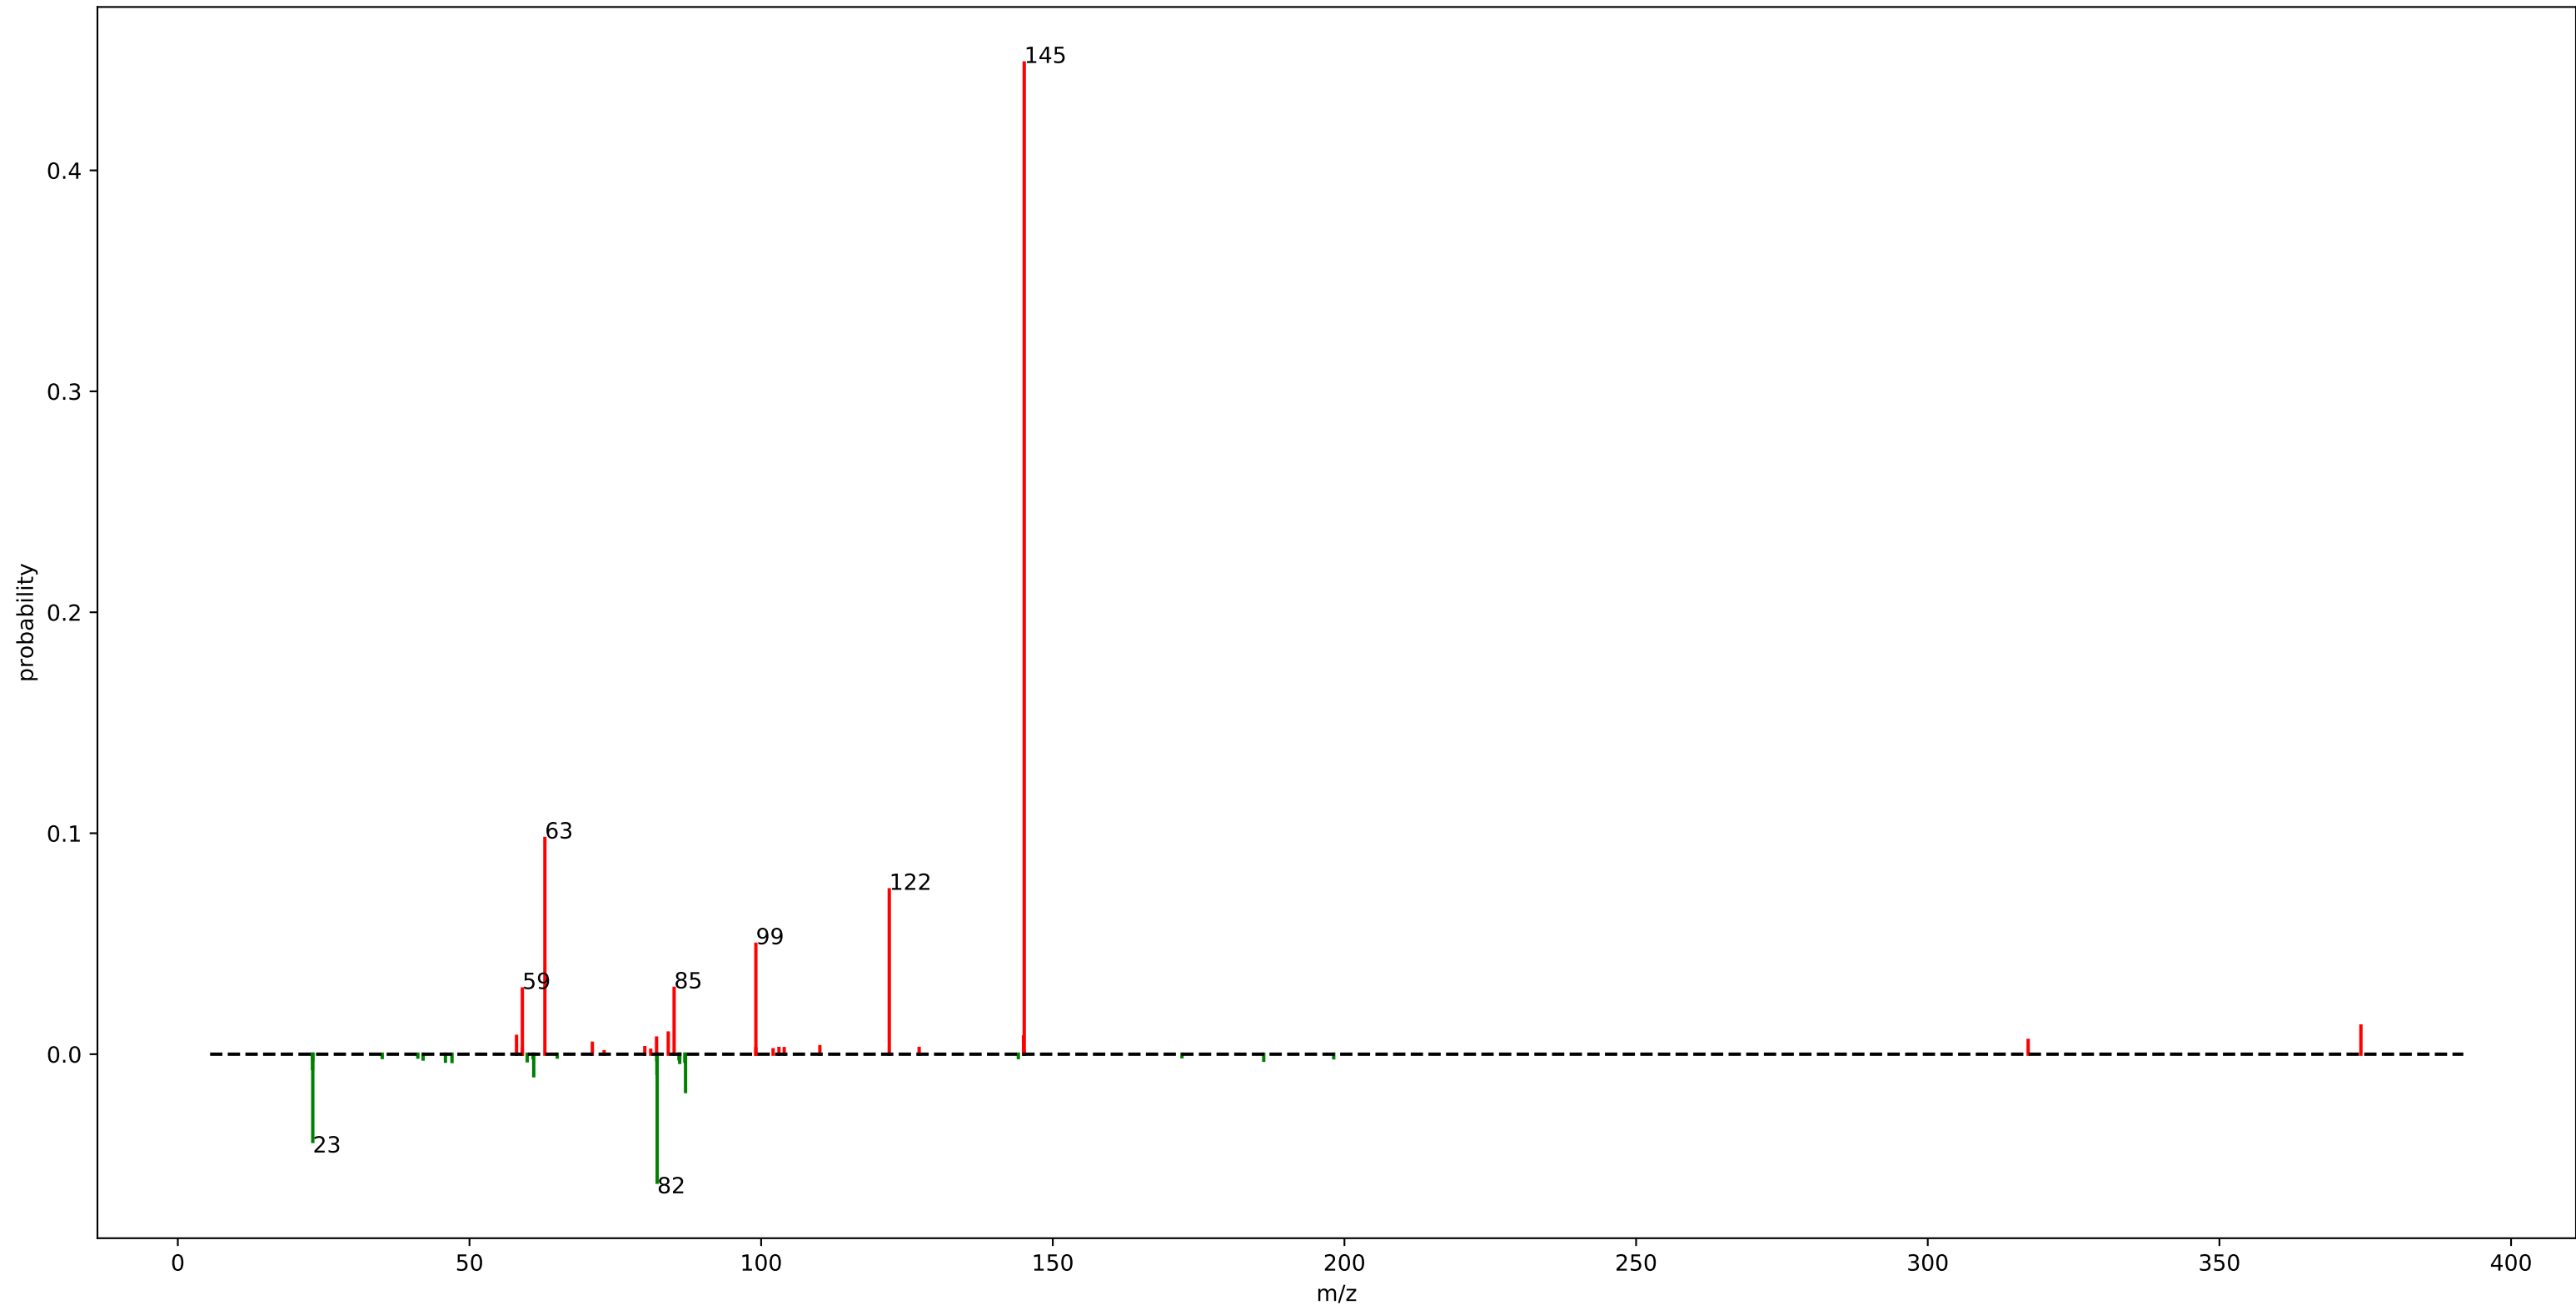

## urine\_mass2motif\_128.m2m

|                   |        |
|-------------------|--------|
| fragment_145.1025 | : 0.45 |
| fragment_62.9275  | : 0.10 |
| fragment_121.9675 | : 0.07 |
| loss_82.1775      | : 0.06 |
| fragment_99.0975  | : 0.05 |
| loss_23.1375      | : 0.04 |
| fragment_85.0825  | : 0.03 |
| fragment_59.0675  | : 0.03 |
| loss_87.0425      | : 0.02 |
| fragment_374.2575 | : 0.01 |
| loss_61.0175      | : 0.01 |
| fragment_84.0825  | : 0.01 |
| loss_82.1325      | : 0.01 |
| fragment_58.0675  | : 0.01 |
| fragment_144.9825 | : 0.01 |
| fragment_82.0725  | : 0.01 |
| loss_82.1675      | : 0.01 |
| loss_23.0925      | : 0.01 |
| fragment_317.2125 | : 0.01 |

gnps\_motif\_44.m2m

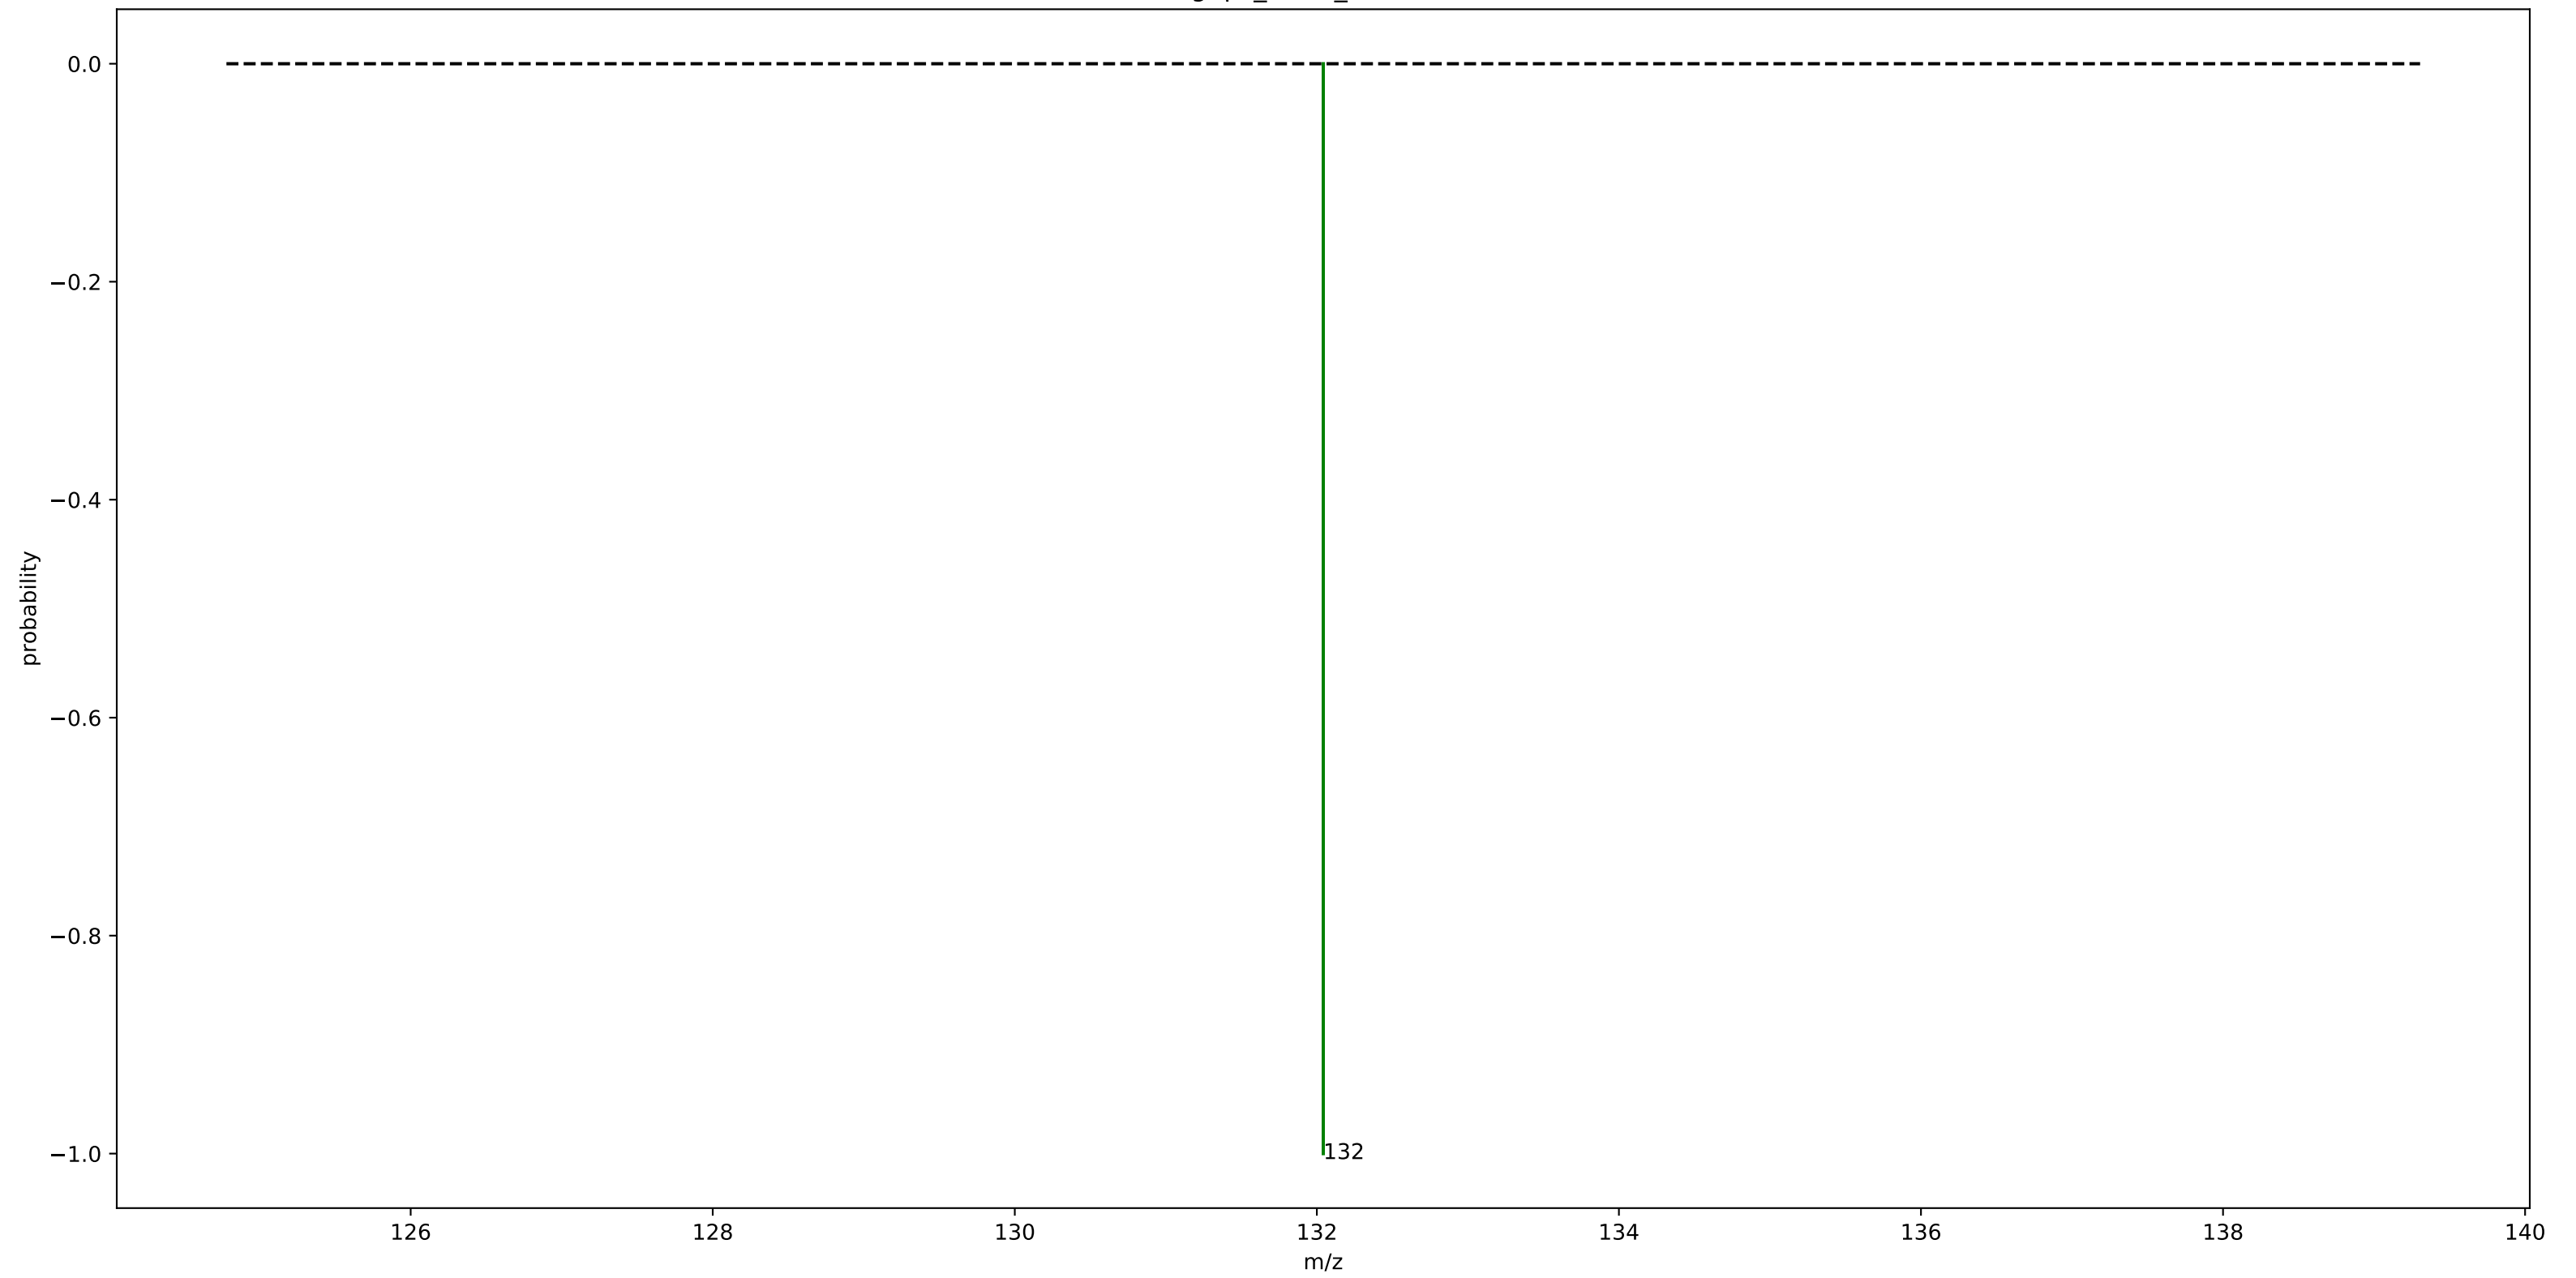

gnps\_motif\_44.m2m

loss\_132.0425 : 1.00



StrepSalini\_motif\_270.m2m

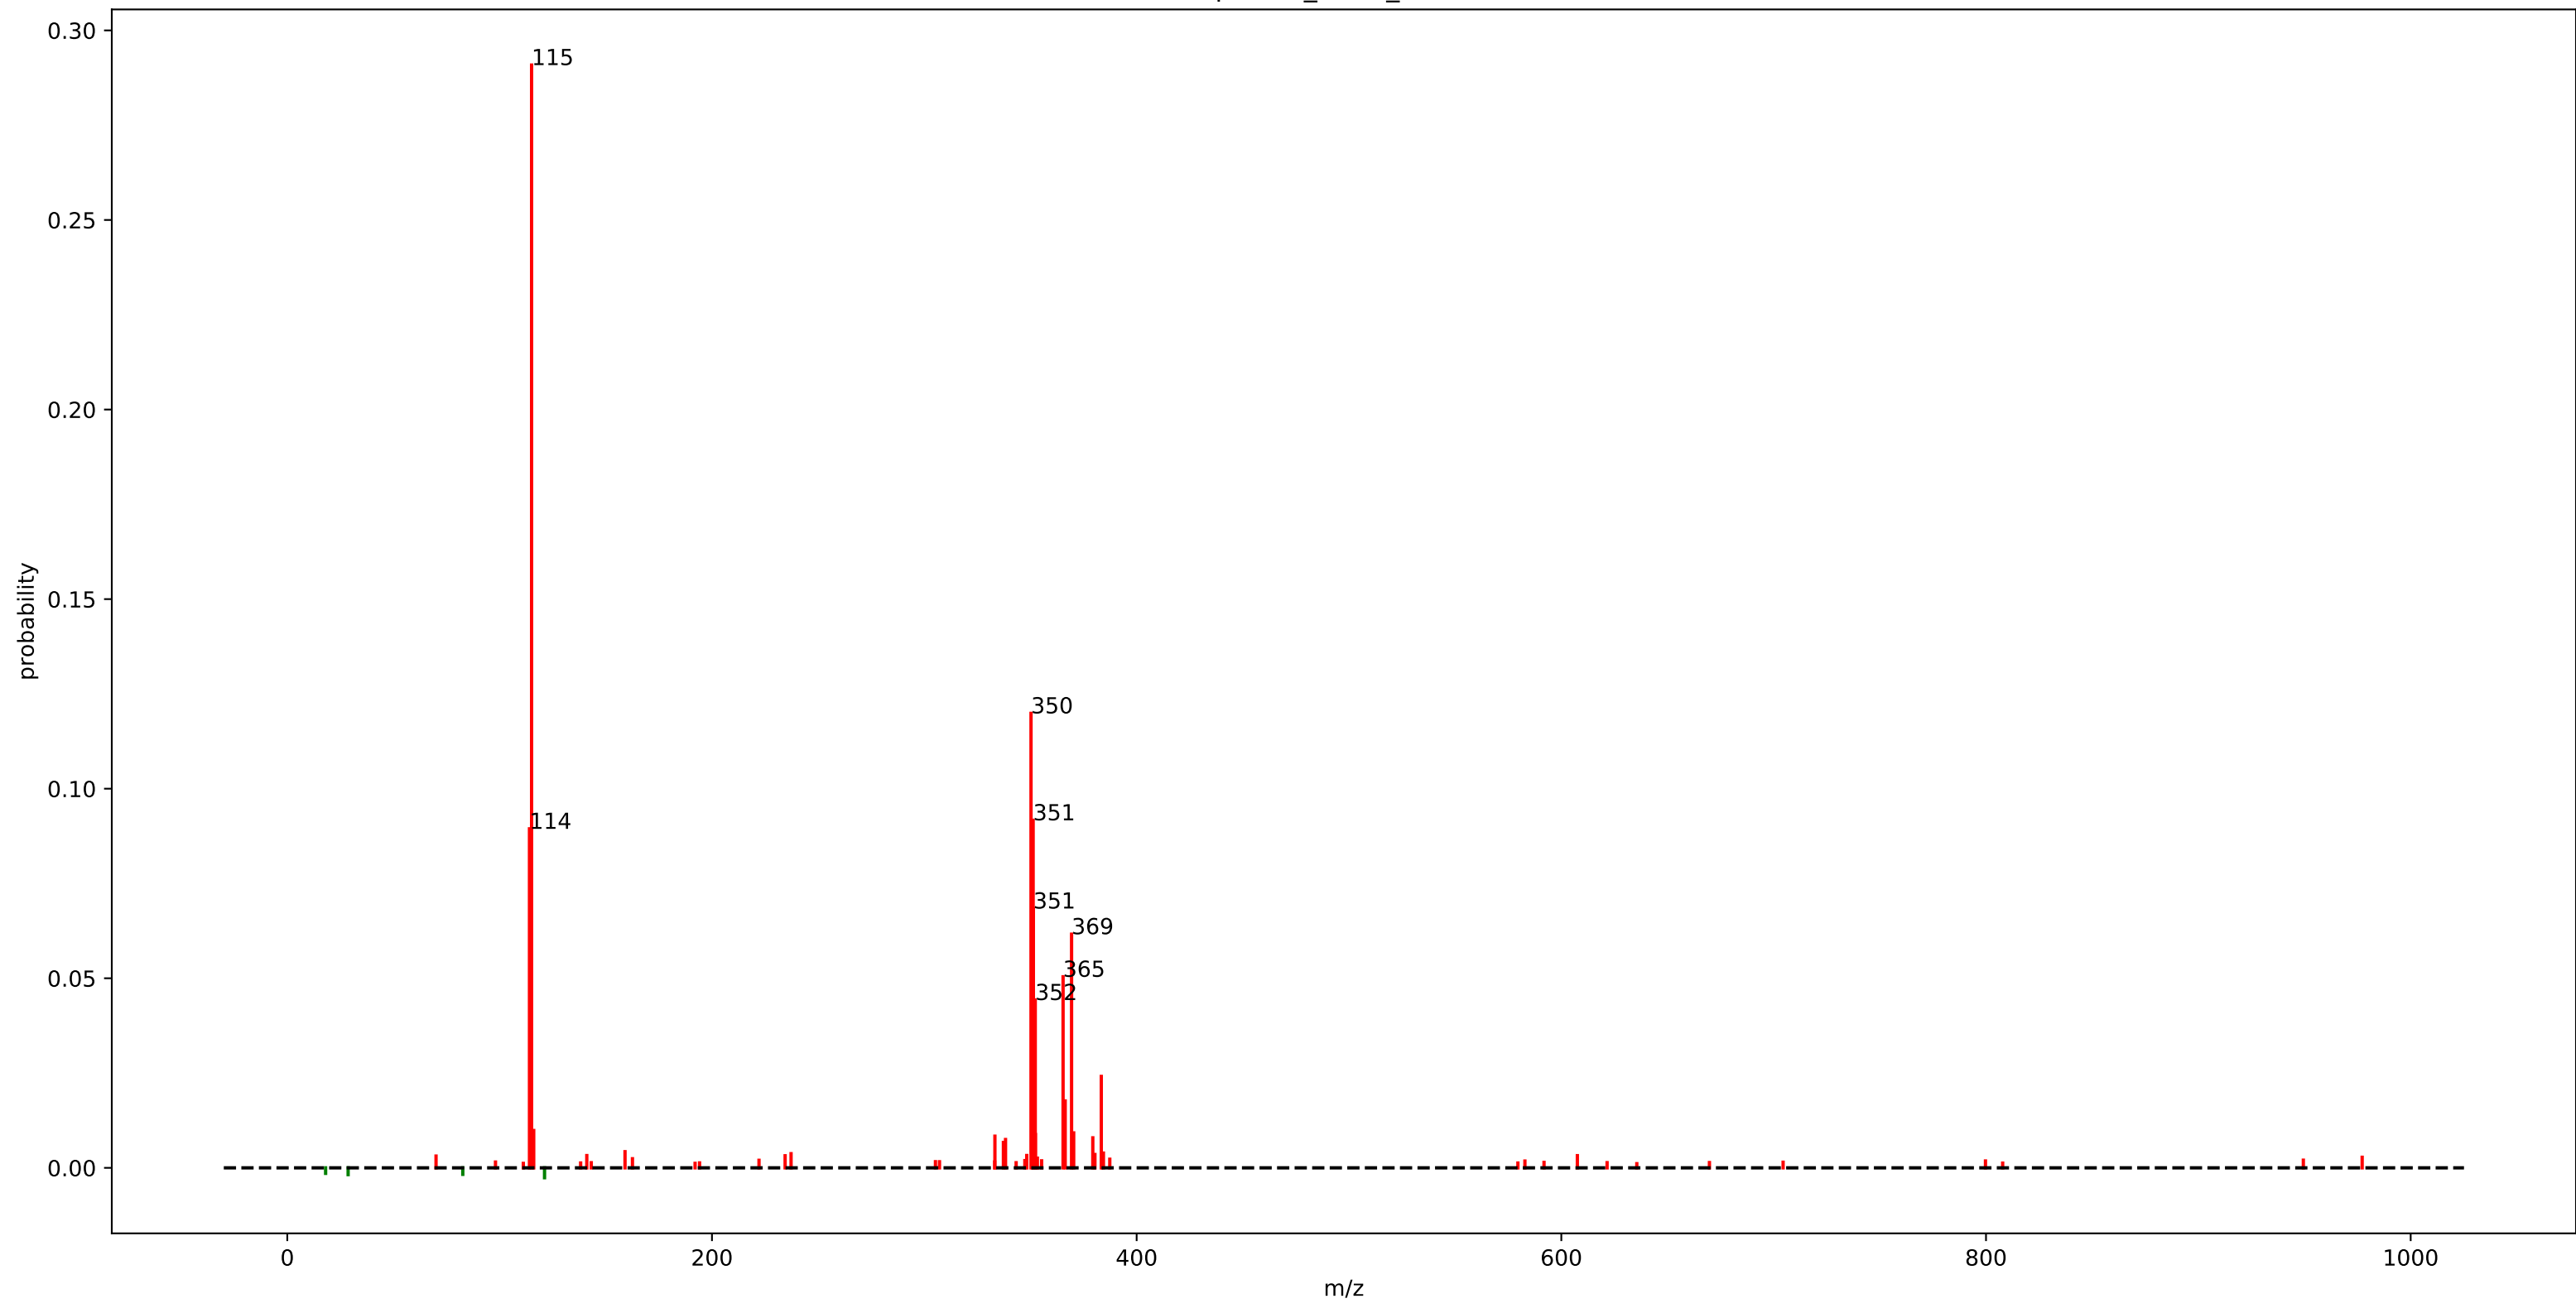

## StrepSalini\_motif\_270.m2m

|                   |        |
|-------------------|--------|
| fragment_115.0500 | : 0.29 |
| fragment_350.2525 | : 0.12 |
| fragment_351.2500 | : 0.09 |
| fragment_114.0525 | : 0.09 |
| fragment_351.3500 | : 0.07 |
| fragment_369.3500 | : 0.06 |
| fragment_365.3500 | : 0.05 |
| fragment_352.2500 | : 0.04 |
| fragment_383.3500 | : 0.02 |
| fragment_366.3500 | : 0.02 |
| fragment_116.0525 | : 0.01 |
| fragment_370.3500 | : 0.01 |
| fragment_352.3500 | : 0.01 |
| fragment_333.2500 | : 0.01 |
| fragment_379.3500 | : 0.01 |
| fragment_338.2500 | : 0.01 |
| fragment_337.2525 | : 0.01 |

euphorbia\_motif\_345.m2m

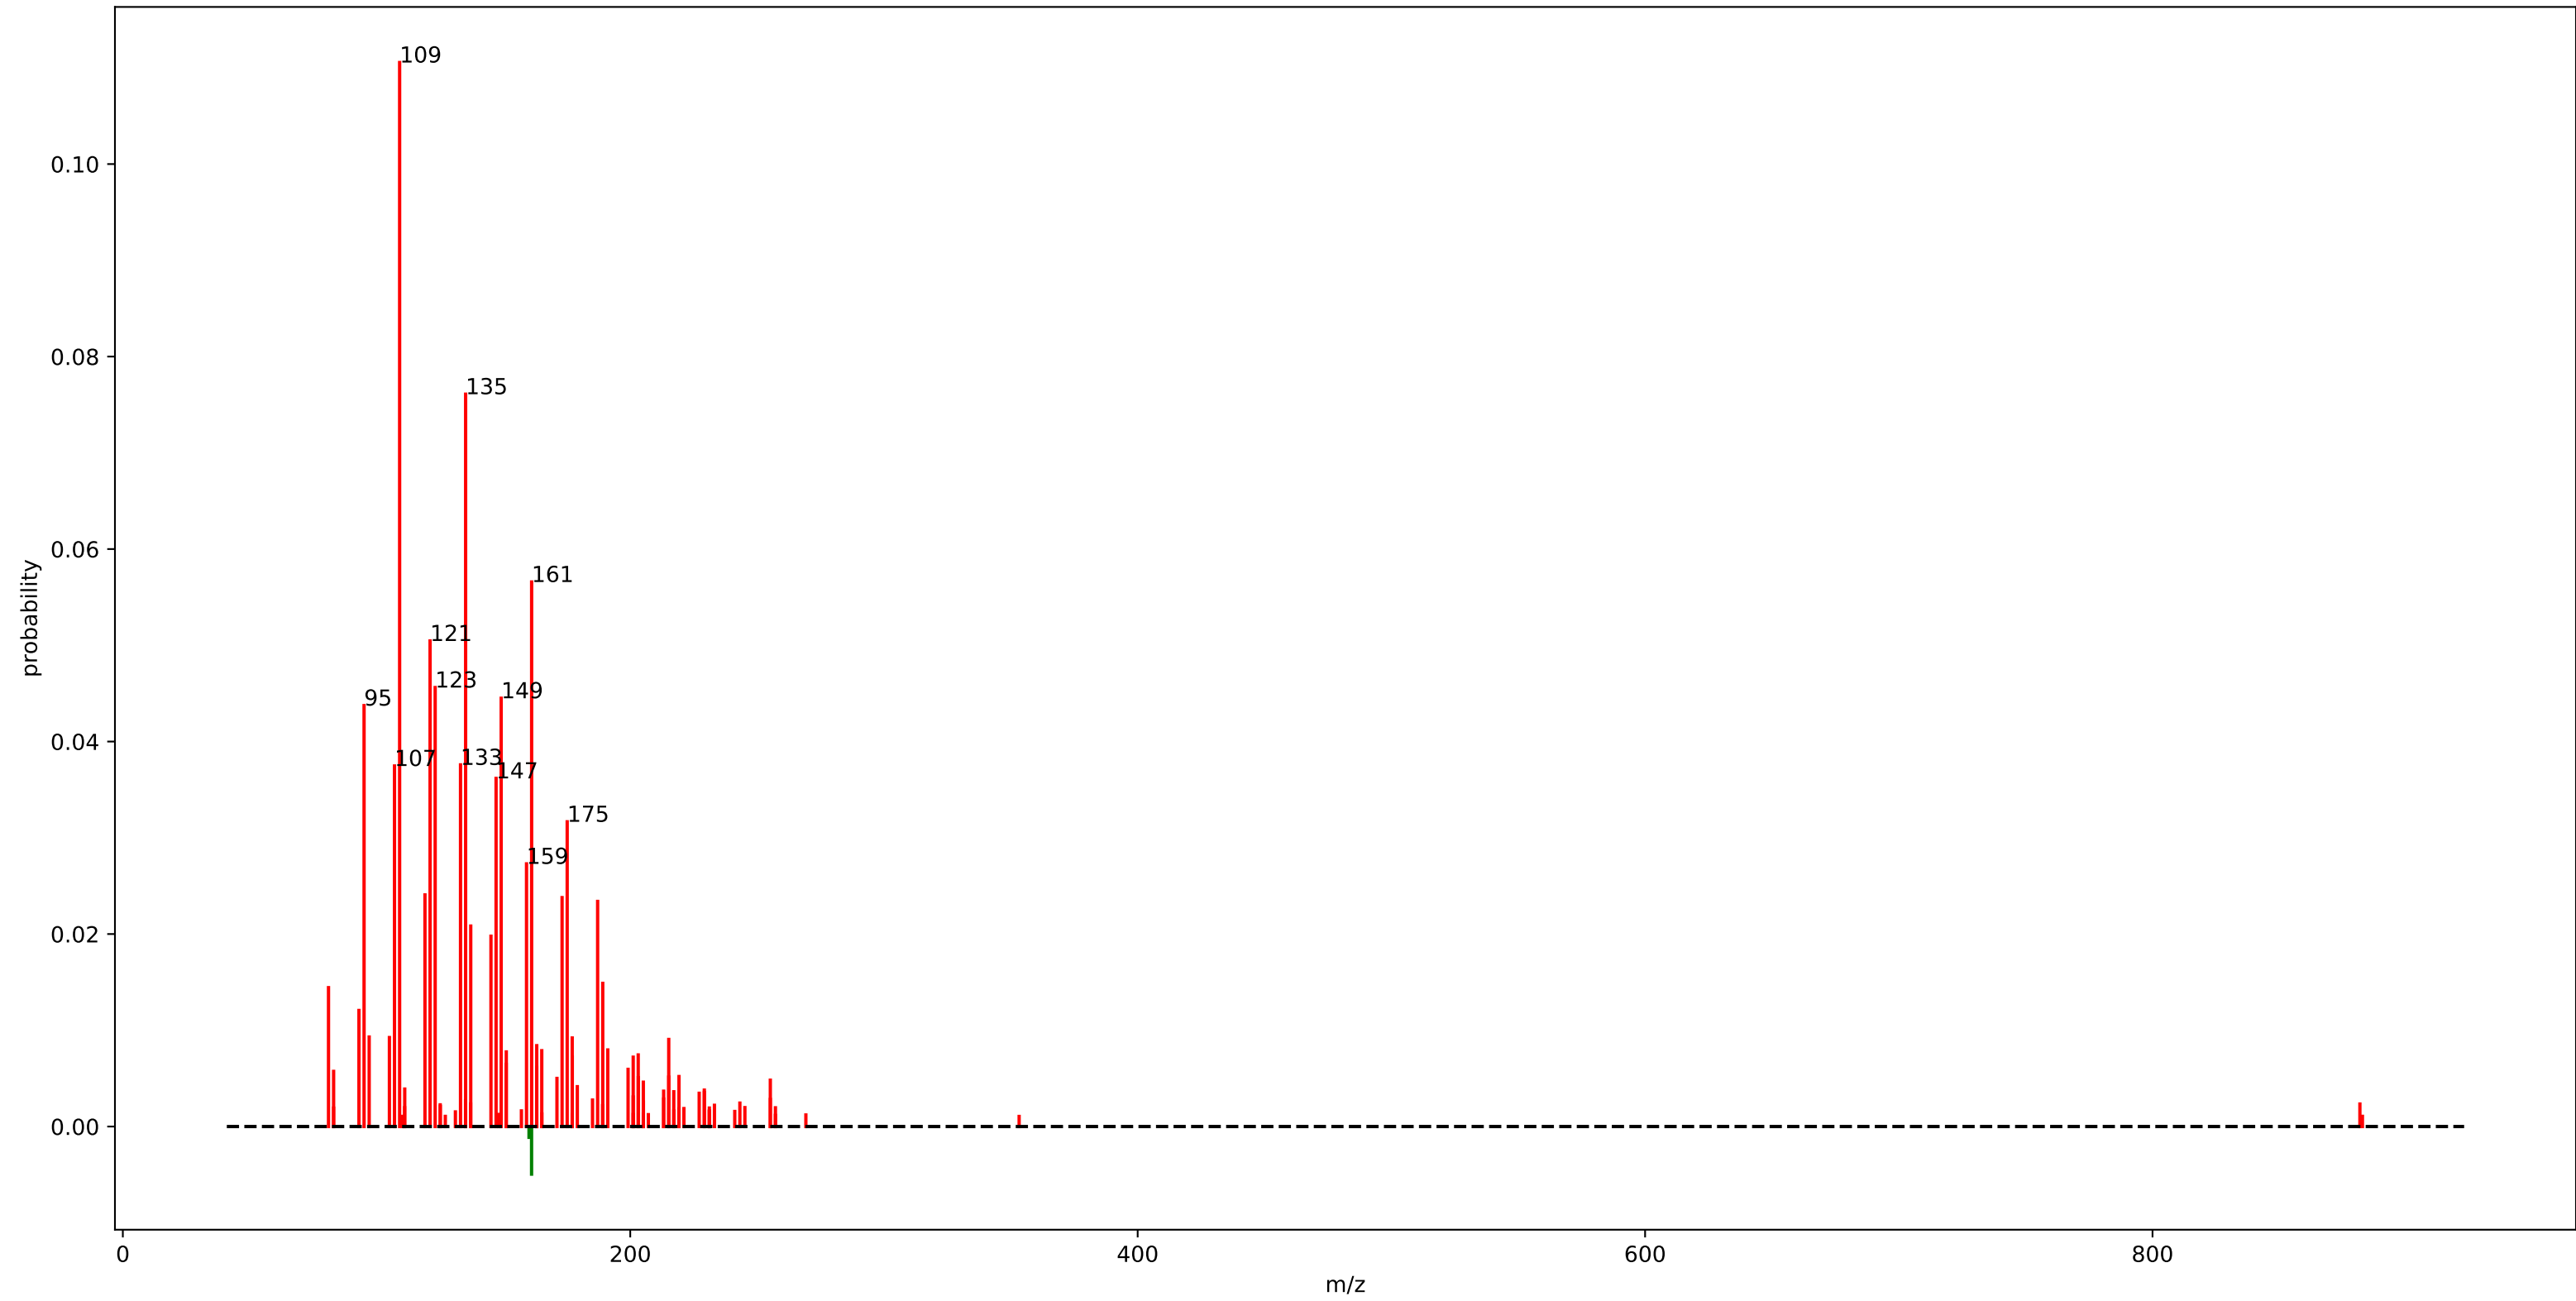

# euphorbia\_motif\_345.m2m

|                   |        |                   |        |
|-------------------|--------|-------------------|--------|
| fragment_109.0975 | : 0.11 | fragment_97.0975  | : 0.01 |
| fragment_135.1125 | : 0.08 | fragment_105.0675 | : 0.01 |
| fragment_161.1275 | : 0.06 | fragment_177.1225 | : 0.01 |
| fragment_121.0975 | : 0.05 | fragment_215.1725 | : 0.01 |
| fragment_123.1125 | : 0.05 | fragment_163.1425 | : 0.01 |
| fragment_149.1275 | : 0.04 | fragment_191.1375 | : 0.01 |
| fragment_95.0825  | : 0.04 | fragment_165.1225 | : 0.01 |
| fragment_133.0975 | : 0.04 | fragment_151.1425 | : 0.01 |
| fragment_107.0825 | : 0.04 | fragment_203.1375 | : 0.01 |
| fragment_147.1125 | : 0.04 | fragment_177.1575 | : 0.01 |
| fragment_175.1425 | : 0.03 | fragment_201.1625 | : 0.01 |
| fragment_159.1125 | : 0.03 | fragment_151.1075 | : 0.01 |
| fragment_119.0825 | : 0.02 | fragment_163.1475 | : 0.01 |
| fragment_173.1275 | : 0.02 | fragment_199.1425 | : 0.01 |
| fragment_187.1425 | : 0.02 | fragment_83.0825  | : 0.01 |
| fragment_137.1275 | : 0.02 | fragment_219.2075 | : 0.01 |
| fragment_145.0975 | : 0.02 | fragment_215.1775 | : 0.01 |
| fragment_189.1575 | : 0.01 | fragment_203.1725 | : 0.01 |
| fragment_81.0675  | : 0.01 |                   |        |
| fragment_93.0675  | : 0.01 |                   |        |

euphorbia\_motif\_328.m2m

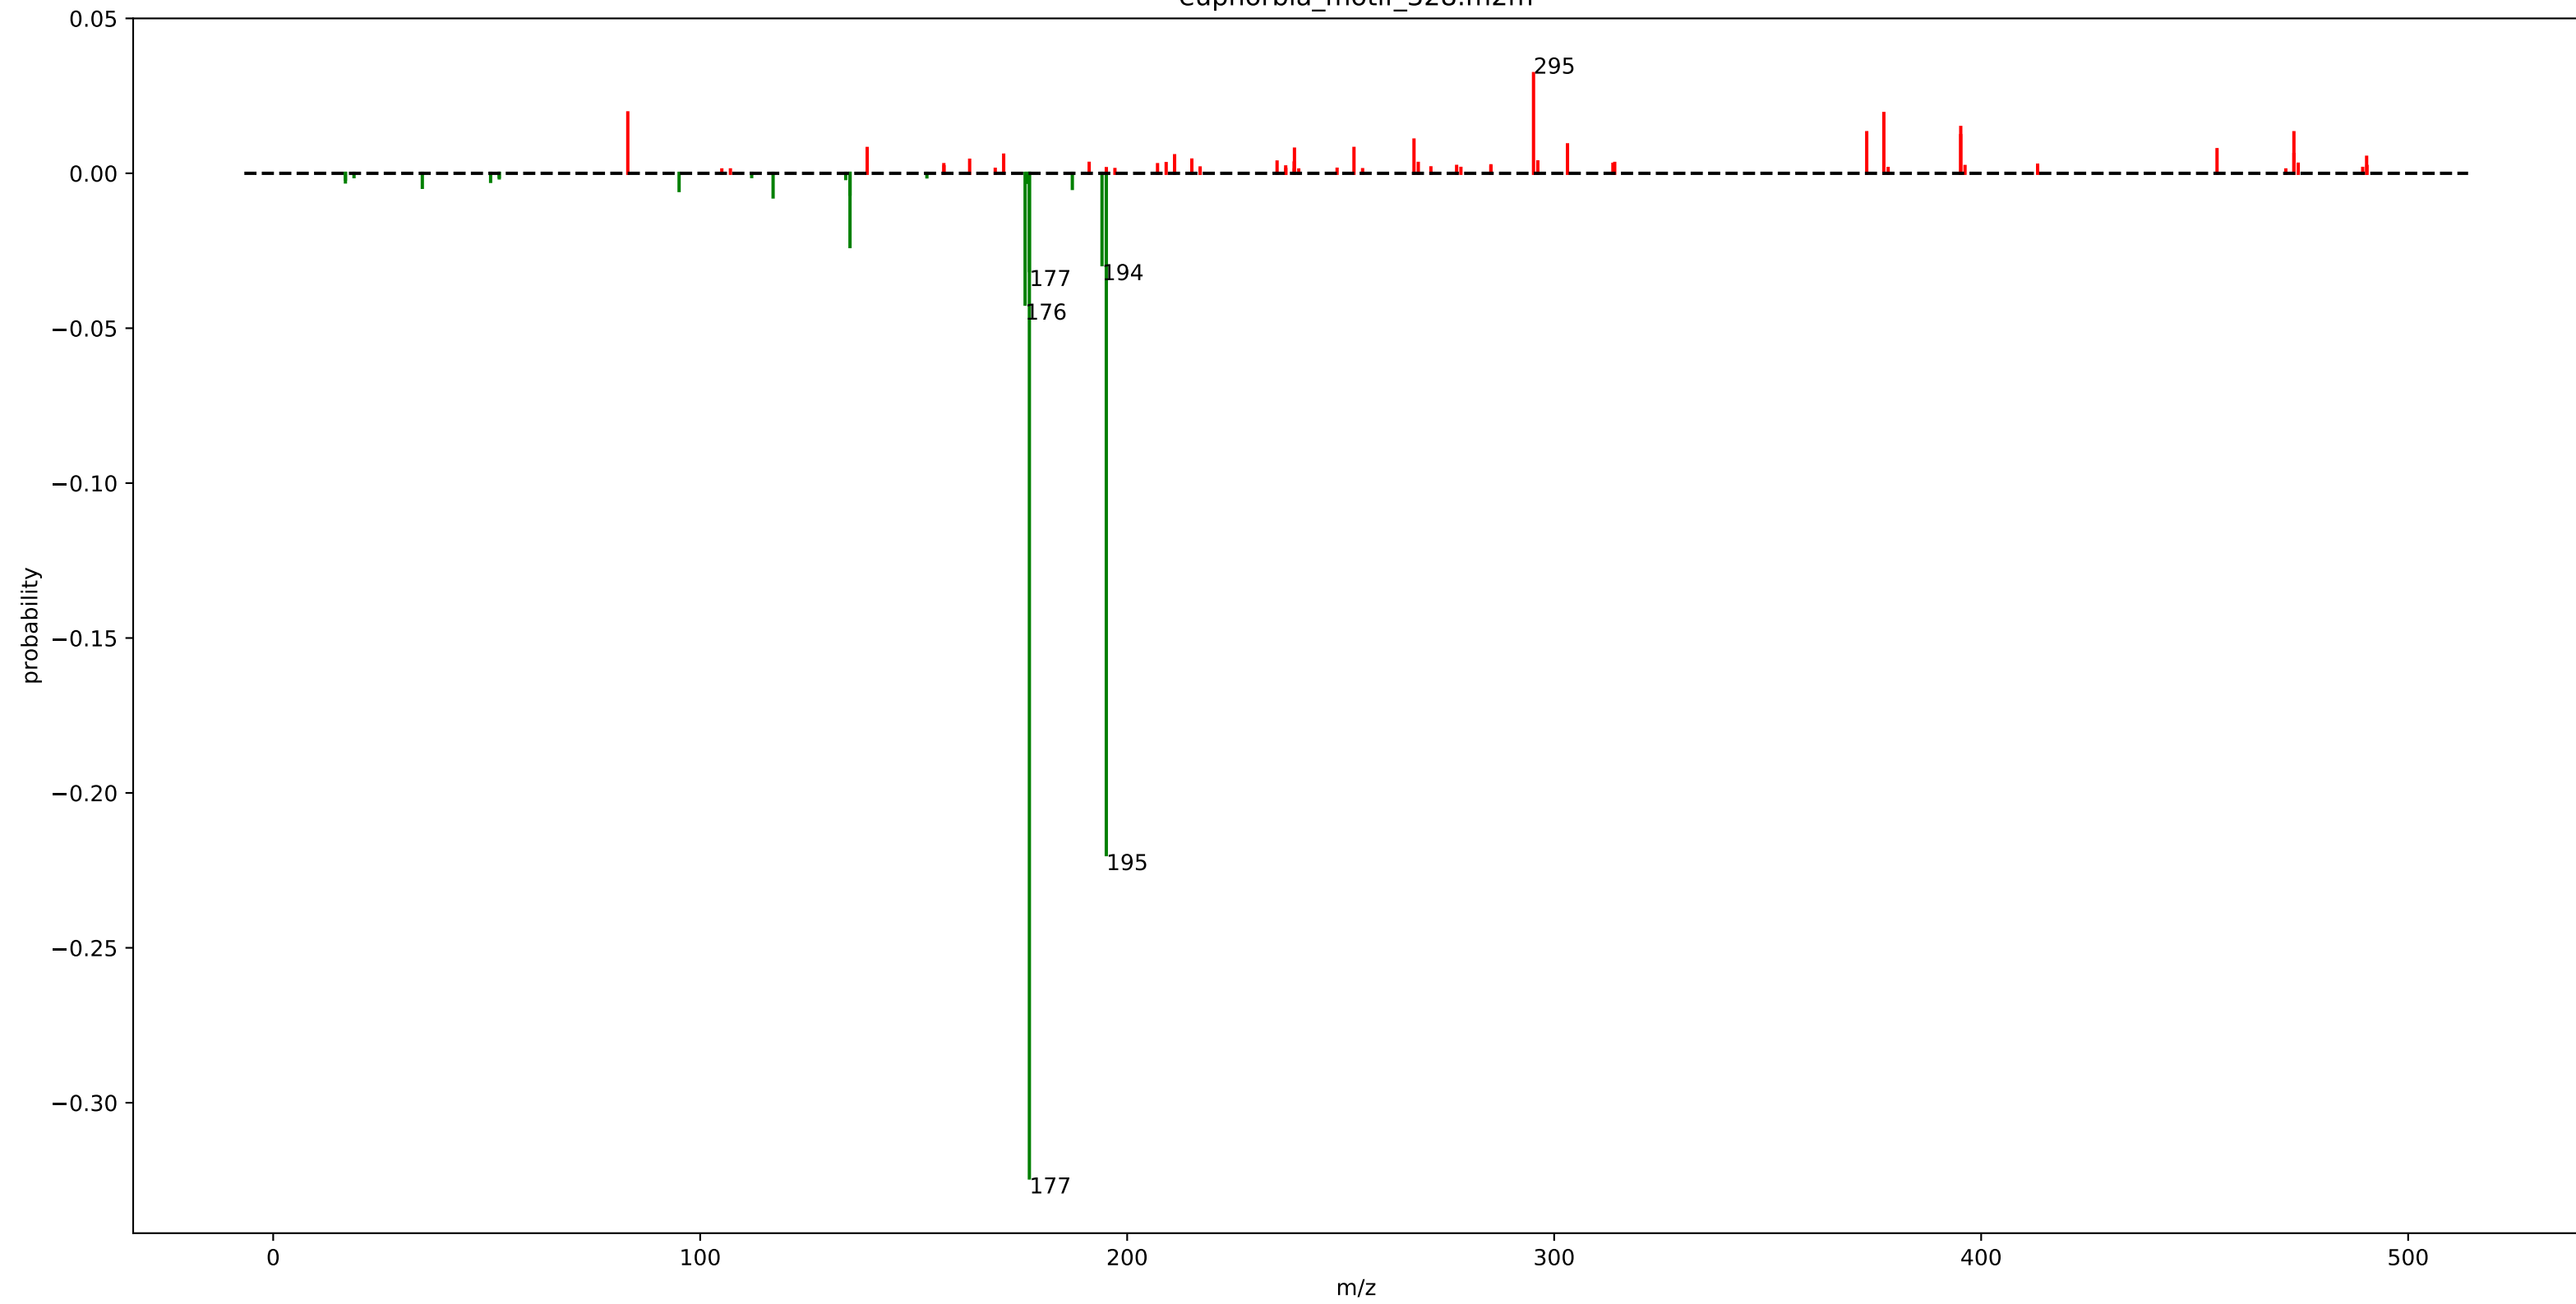

# euphorbia\_motif\_328.m2m

|                   |        |                   |        |
|-------------------|--------|-------------------|--------|
| loss_177.0975     | : 0.32 | loss_135.0925     | : 0.01 |
| loss_195.1125     | : 0.22 | fragment_473.2525 | : 0.01 |
| loss_176.0975     | : 0.04 | fragment_171.0775 | : 0.01 |
| fragment_295.1675 | : 0.03 | fragment_211.1075 | : 0.01 |
| loss_177.1025     | : 0.03 | loss_95.0625      | : 0.01 |
| loss_194.1075     | : 0.03 | fragment_490.2775 | : 0.01 |
| loss_135.0875     | : 0.02 |                   |        |
| fragment_83.0475  | : 0.02 |                   |        |
| fragment_377.2125 | : 0.02 |                   |        |
| fragment_395.2225 | : 0.01 |                   |        |
| fragment_373.2025 | : 0.01 |                   |        |
| fragment_473.2475 | : 0.01 |                   |        |
| fragment_395.2175 | : 0.01 |                   |        |
| fragment_267.1725 | : 0.01 |                   |        |
| fragment_303.1225 | : 0.01 |                   |        |
| fragment_253.1175 | : 0.01 |                   |        |
| fragment_139.1125 | : 0.01 |                   |        |
| fragment_239.1775 | : 0.01 |                   |        |
| loss_117.0775     | : 0.01 |                   |        |
| fragment_455.2425 | : 0.01 |                   |        |

motif\_538

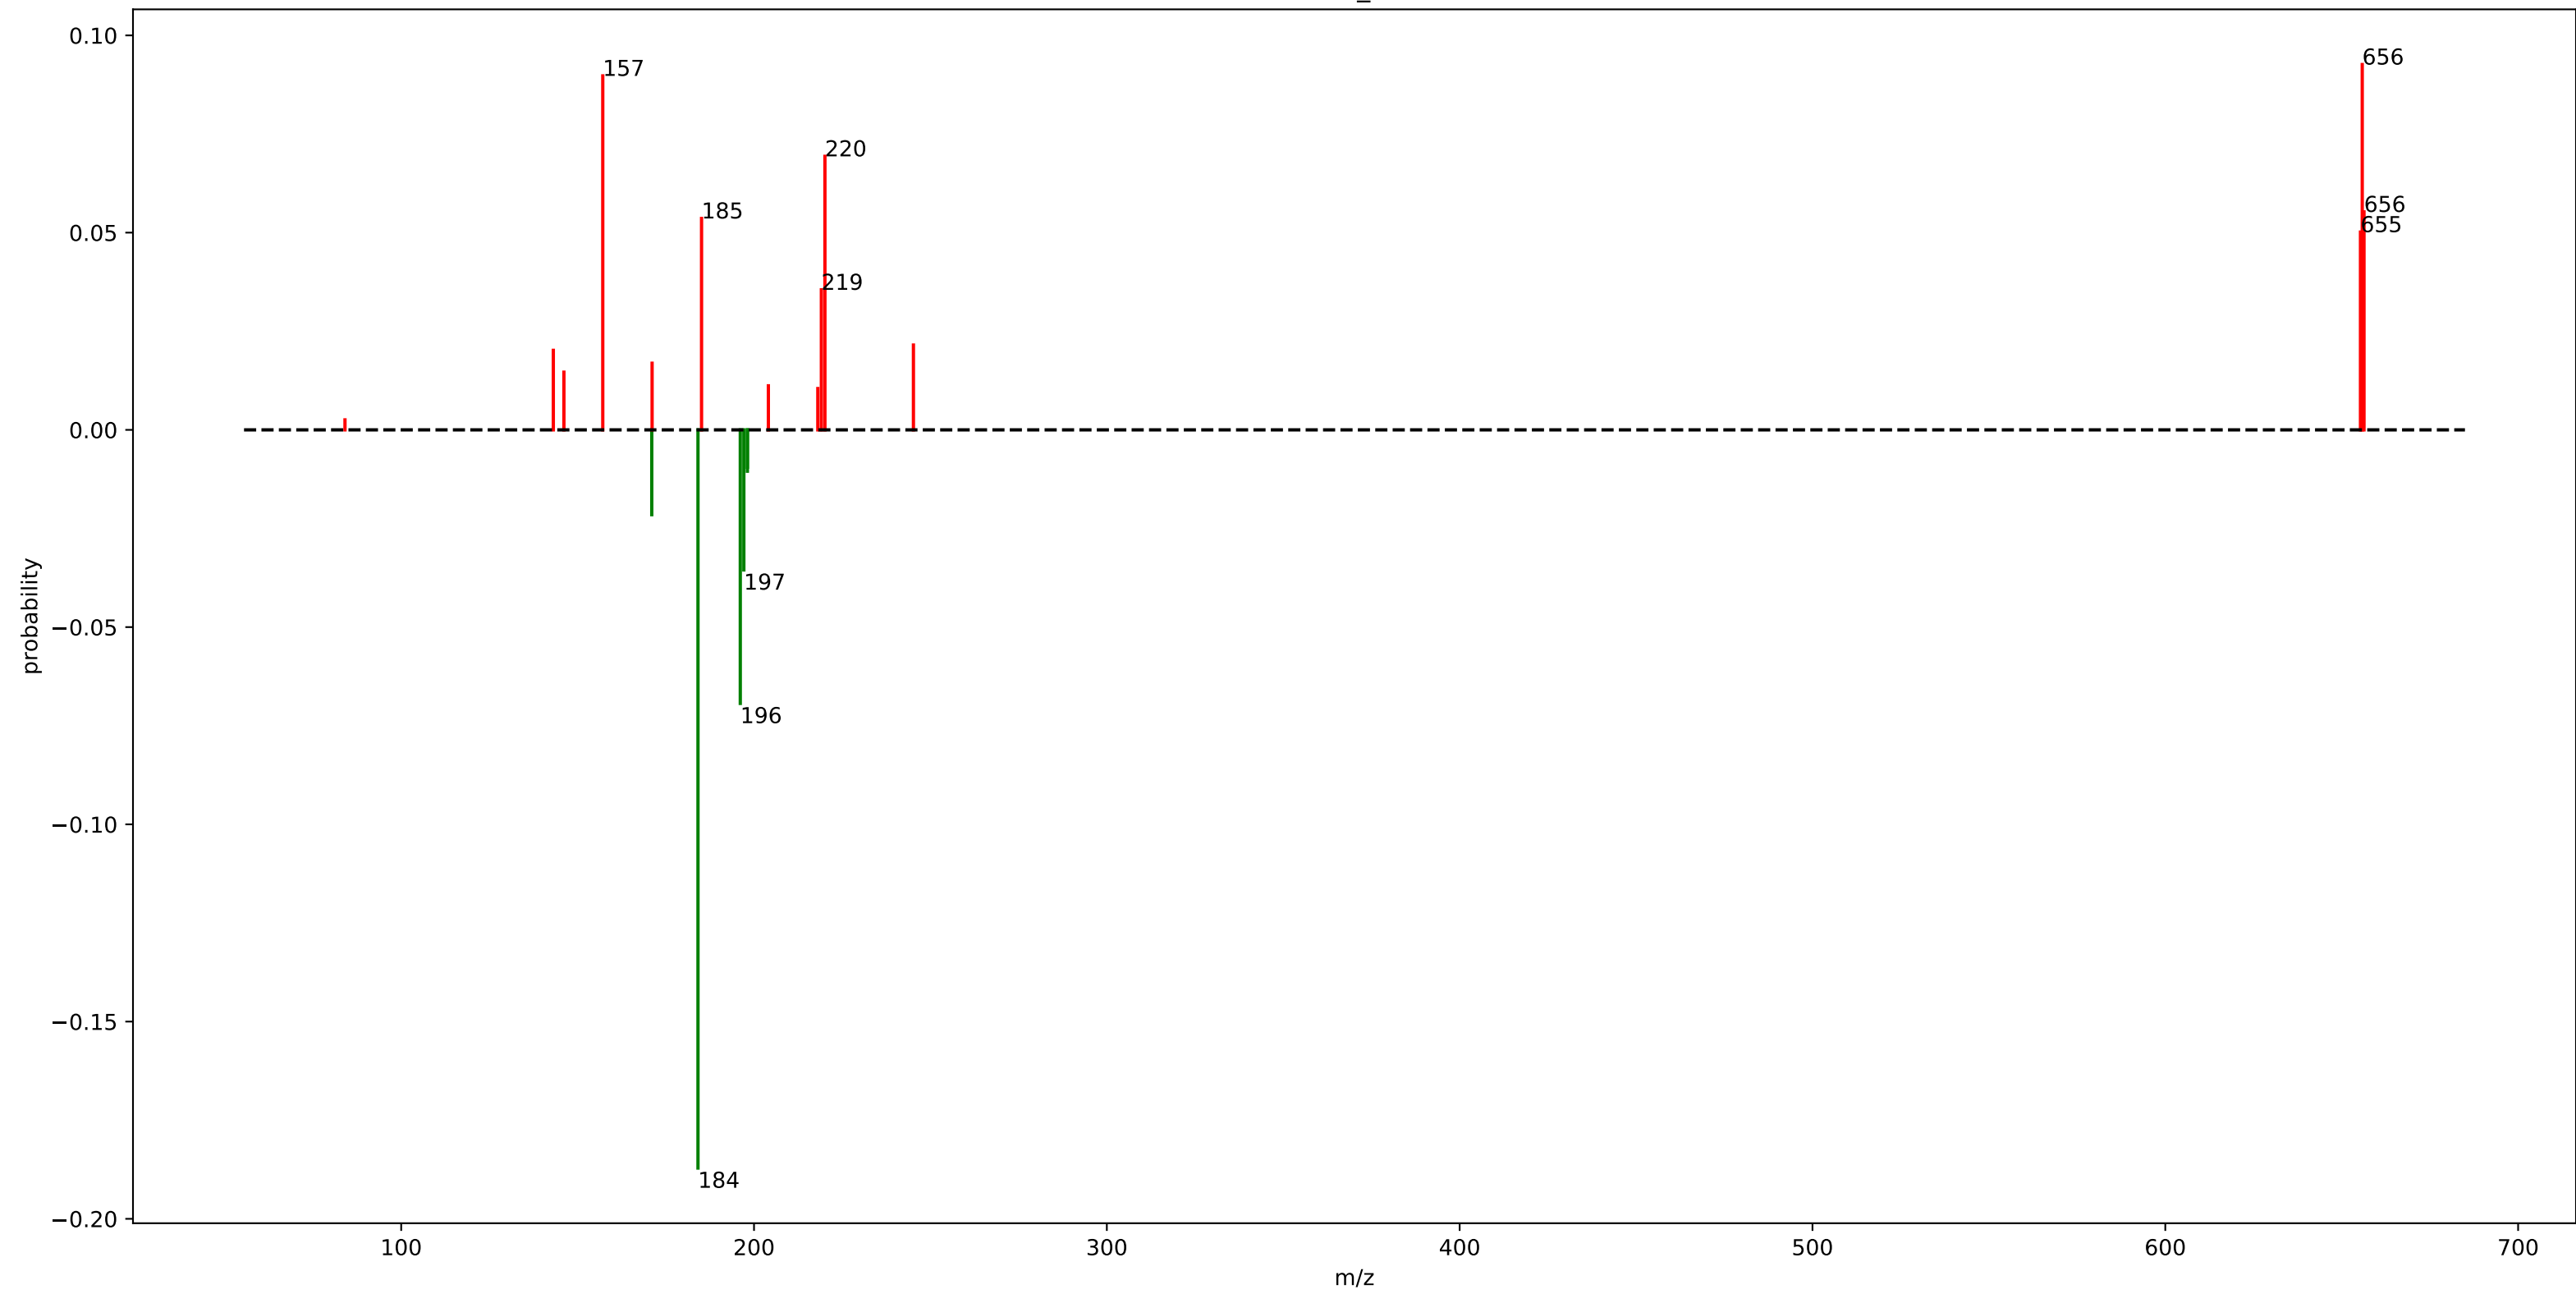

## motif\_538

|                   |        |
|-------------------|--------|
| loss_184.1175     | : 0.19 |
| fragment_655.8175 | : 0.09 |
| fragment_157.1325 | : 0.09 |
| loss_196.1075     | : 0.07 |
| fragment_220.0975 | : 0.07 |
| fragment_656.3175 | : 0.06 |
| fragment_185.1275 | : 0.05 |
| fragment_655.3175 | : 0.05 |
| fragment_219.0875 | : 0.04 |
| loss_197.1175     | : 0.04 |
| fragment_245.1825 | : 0.02 |
| loss_171.0175     | : 0.02 |
| fragment_143.1175 | : 0.02 |
| fragment_171.1125 | : 0.02 |
| fragment_146.1175 | : 0.01 |
| fragment_204.0675 | : 0.01 |
| loss_198.1225     | : 0.01 |
| fragment_218.0825 | : 0.01 |
| loss_198.1375     | : 0.01 |



urine\_mass2motif\_52.m2m

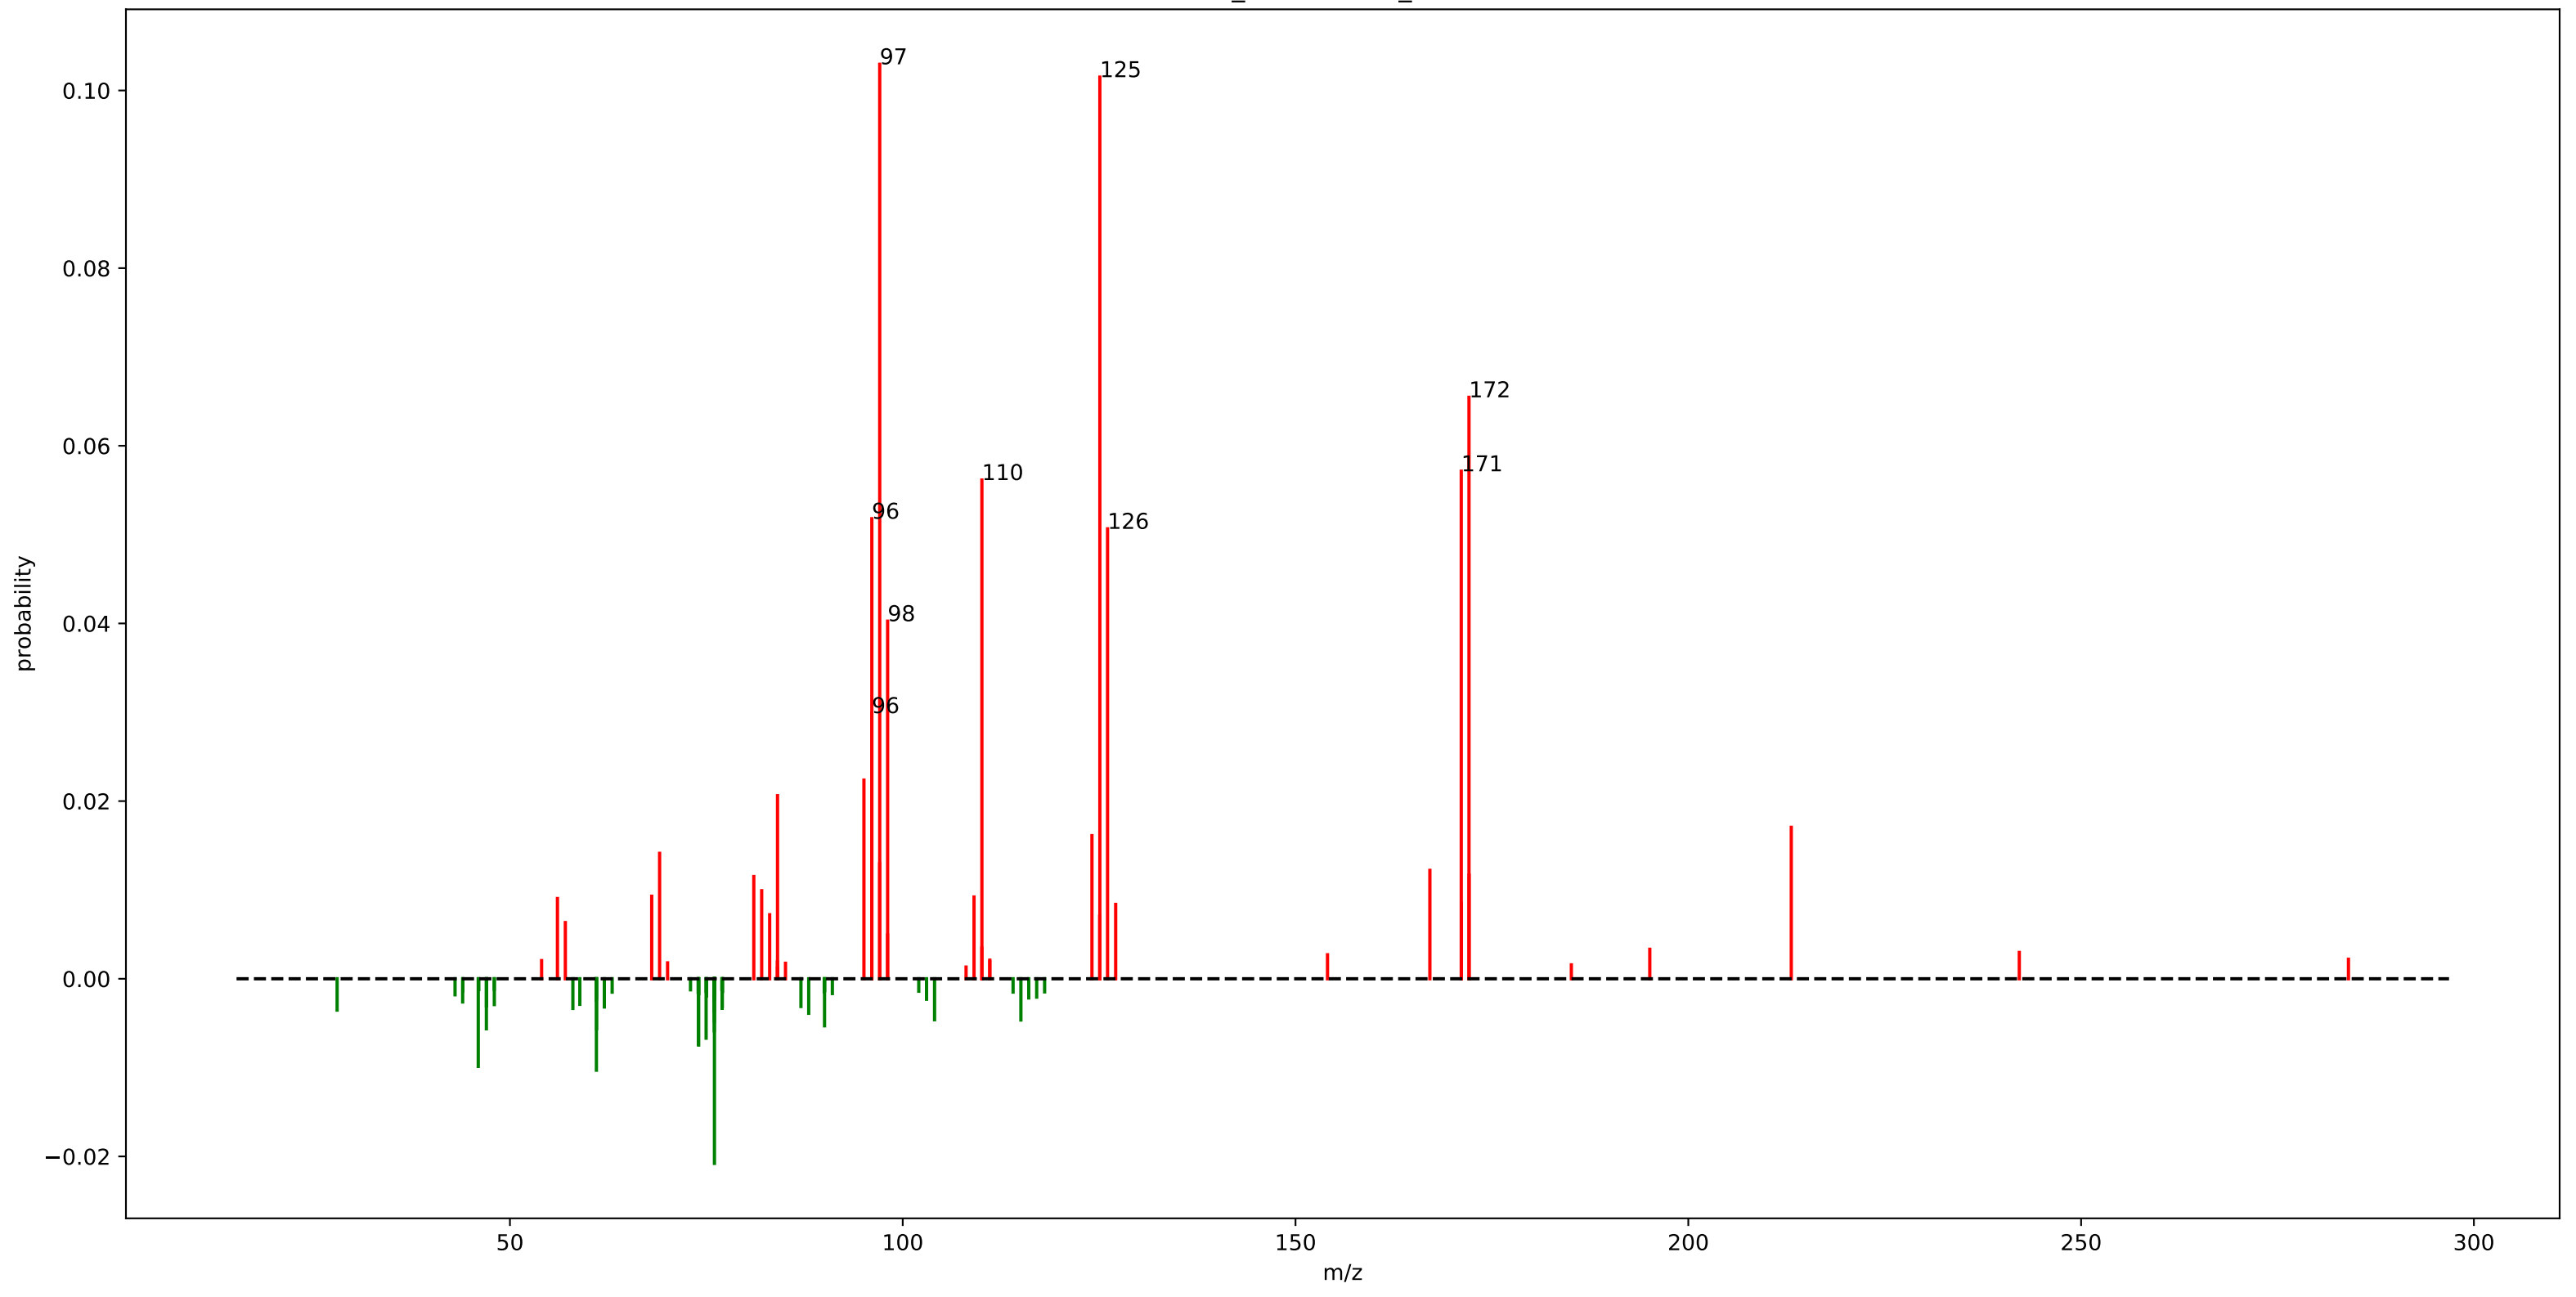

# urine\_mass2motif\_52.m2m

|                   |        |                   |        |
|-------------------|--------|-------------------|--------|
| fragment_97.0725  | : 0.10 | fragment_82.0475  | : 0.01 |
| fragment_125.0925 | : 0.10 | loss_45.9675      | : 0.01 |
| fragment_172.0825 | : 0.07 | fragment_68.0475  | : 0.01 |
| fragment_171.0975 | : 0.06 | fragment_109.0775 | : 0.01 |
| fragment_110.0775 | : 0.06 | fragment_56.0475  | : 0.01 |
| fragment_96.0675  | : 0.05 | fragment_171.1125 | : 0.01 |
| fragment_126.0725 | : 0.05 | fragment_127.1075 | : 0.01 |
| fragment_98.0775  | : 0.04 | loss_74.0225      | : 0.01 |
| fragment_96.0625  | : 0.03 | loss_73.9925      | : 0.01 |
| fragment_95.0625  | : 0.02 | fragment_83.0625  | : 0.01 |
| loss_76.0325      | : 0.02 | fragment_125.0725 | : 0.01 |
| fragment_84.0625  | : 0.02 | loss_74.9725      | : 0.01 |
| fragment_213.1075 | : 0.02 | fragment_57.0525  | : 0.01 |
| fragment_124.0875 | : 0.02 | loss_76.0075      | : 0.01 |
| fragment_69.0525  | : 0.01 | loss_47.0025      | : 0.01 |
| fragment_97.0625  | : 0.01 | loss_61.0325      | : 0.01 |
| fragment_167.1025 | : 0.01 | loss_90.0475      | : 0.01 |
| fragment_172.0975 | : 0.01 |                   |        |
| fragment_81.0425  | : 0.01 |                   |        |
| loss_61.0075      | : 0.01 |                   |        |

urine\_mass2motif\_32.m2m

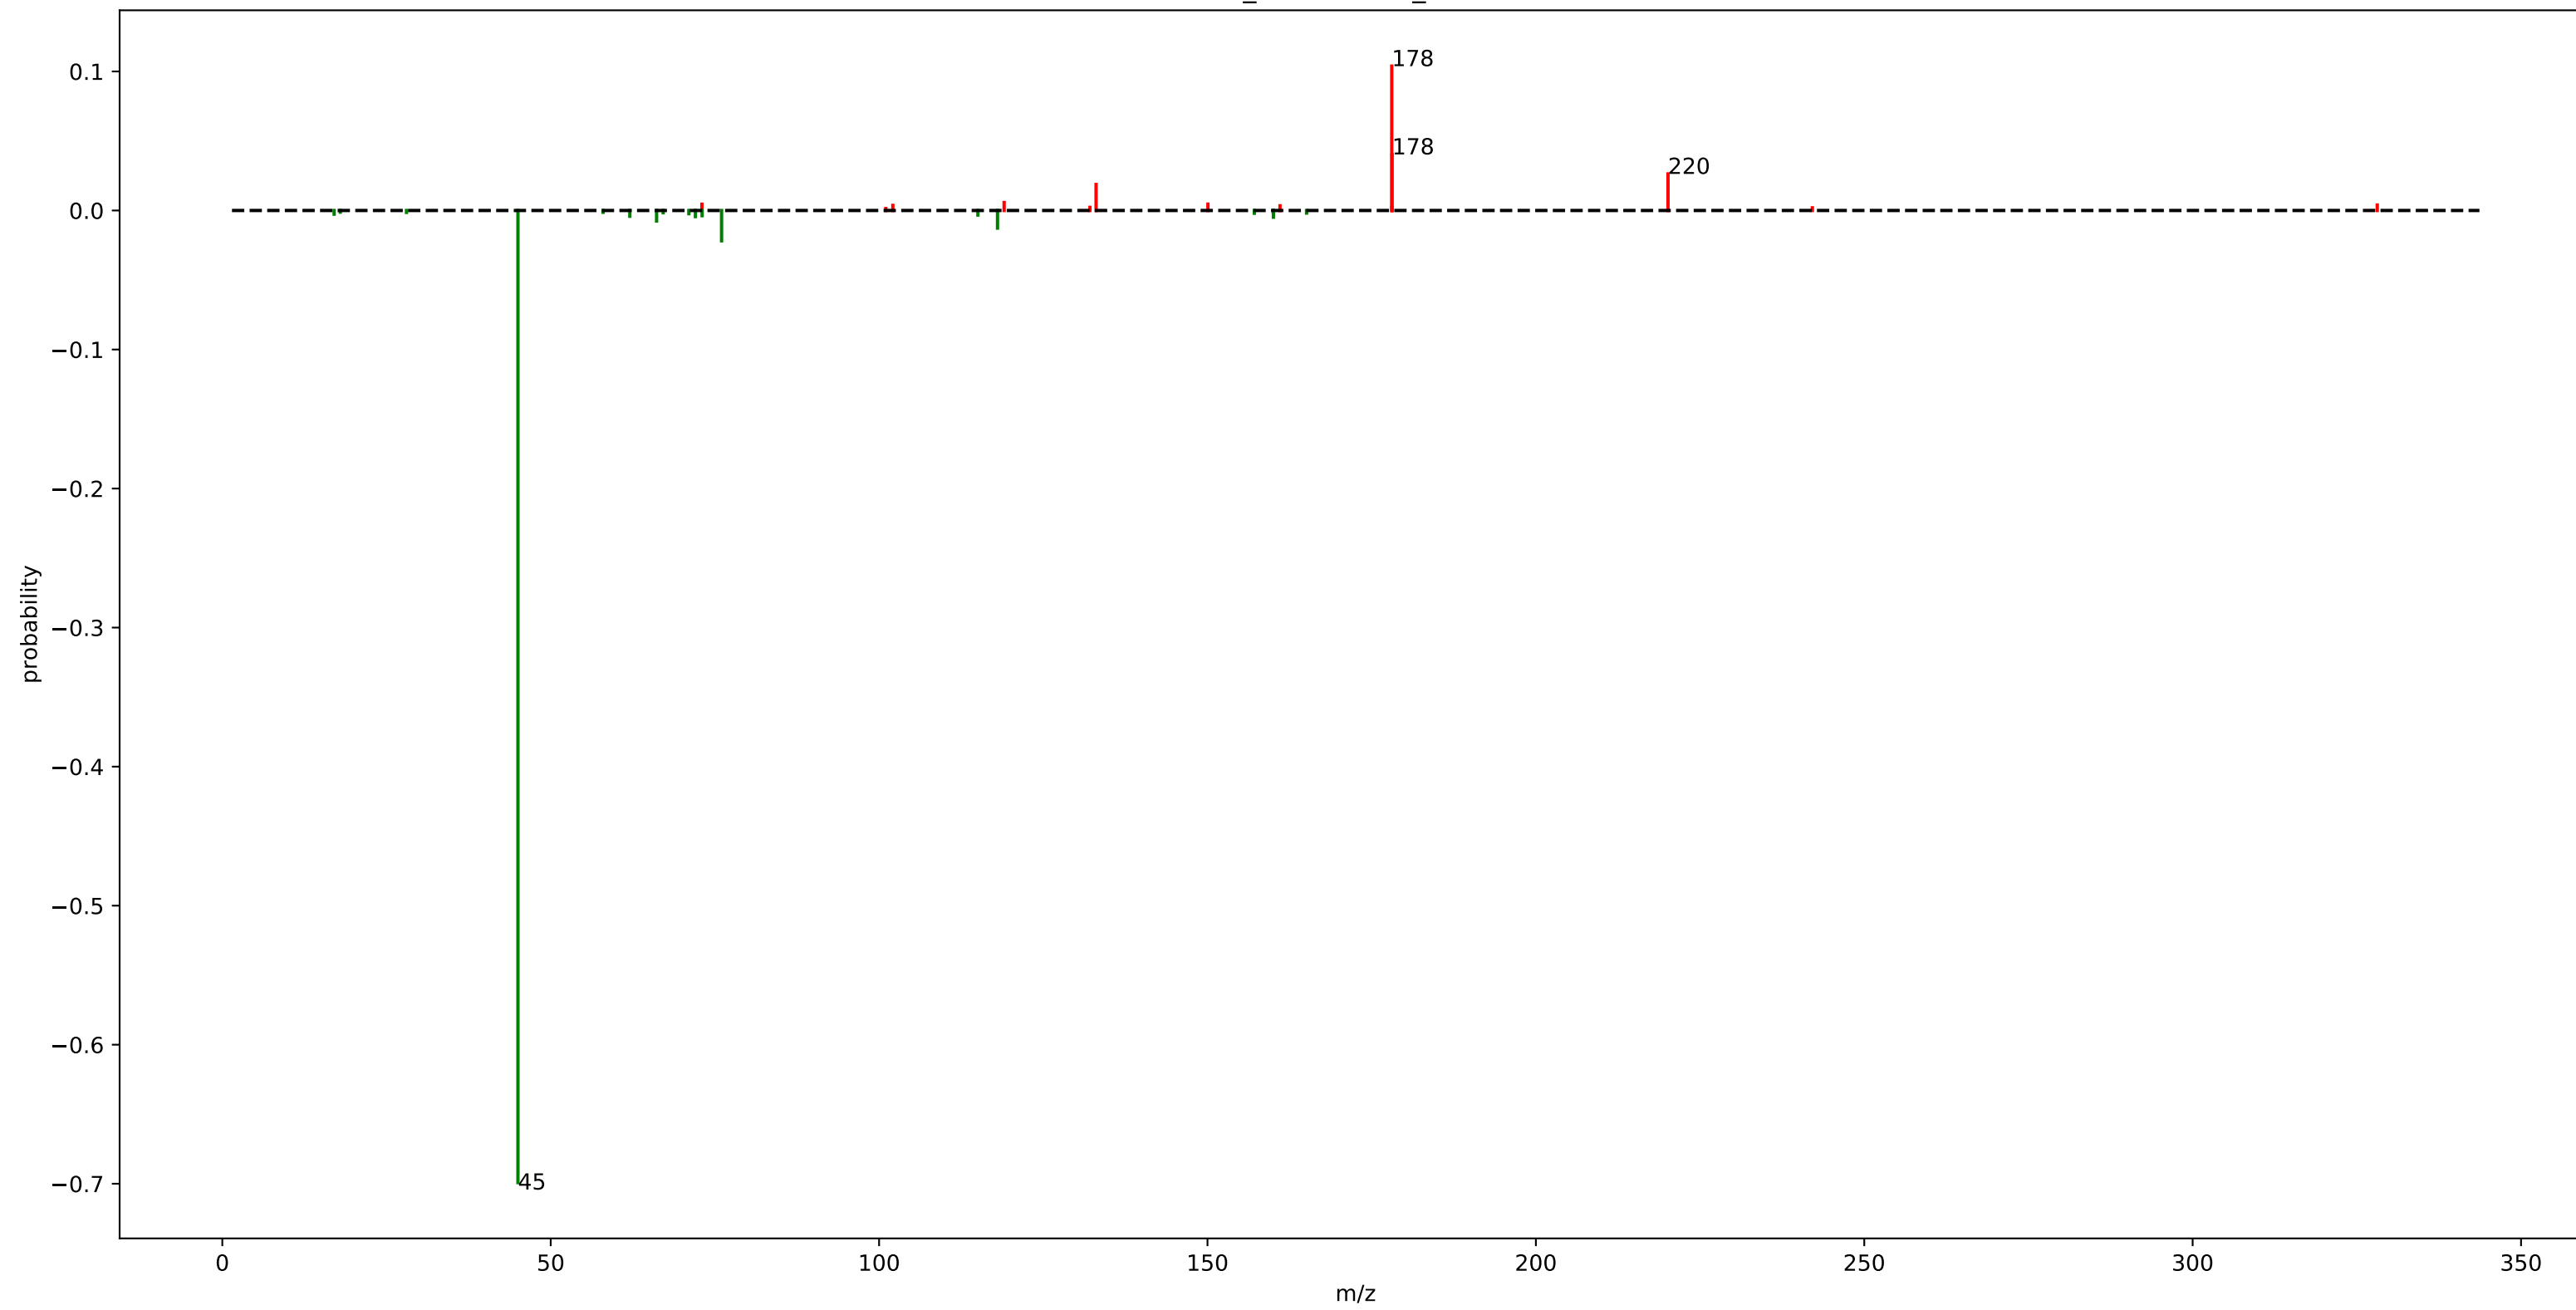

## urine\_mass2motif\_32.m2m

|                   |        |
|-------------------|--------|
| loss_45.0125      | : 0.70 |
| fragment_178.0575 | : 0.10 |
| fragment_178.1075 | : 0.04 |
| fragment_220.1175 | : 0.03 |
| loss_76.0175      | : 0.02 |
| fragment_133.0375 | : 0.02 |
| loss_118.0325     | : 0.01 |
| loss_66.1225      | : 0.01 |
| fragment_119.0375 | : 0.01 |

motif\_457

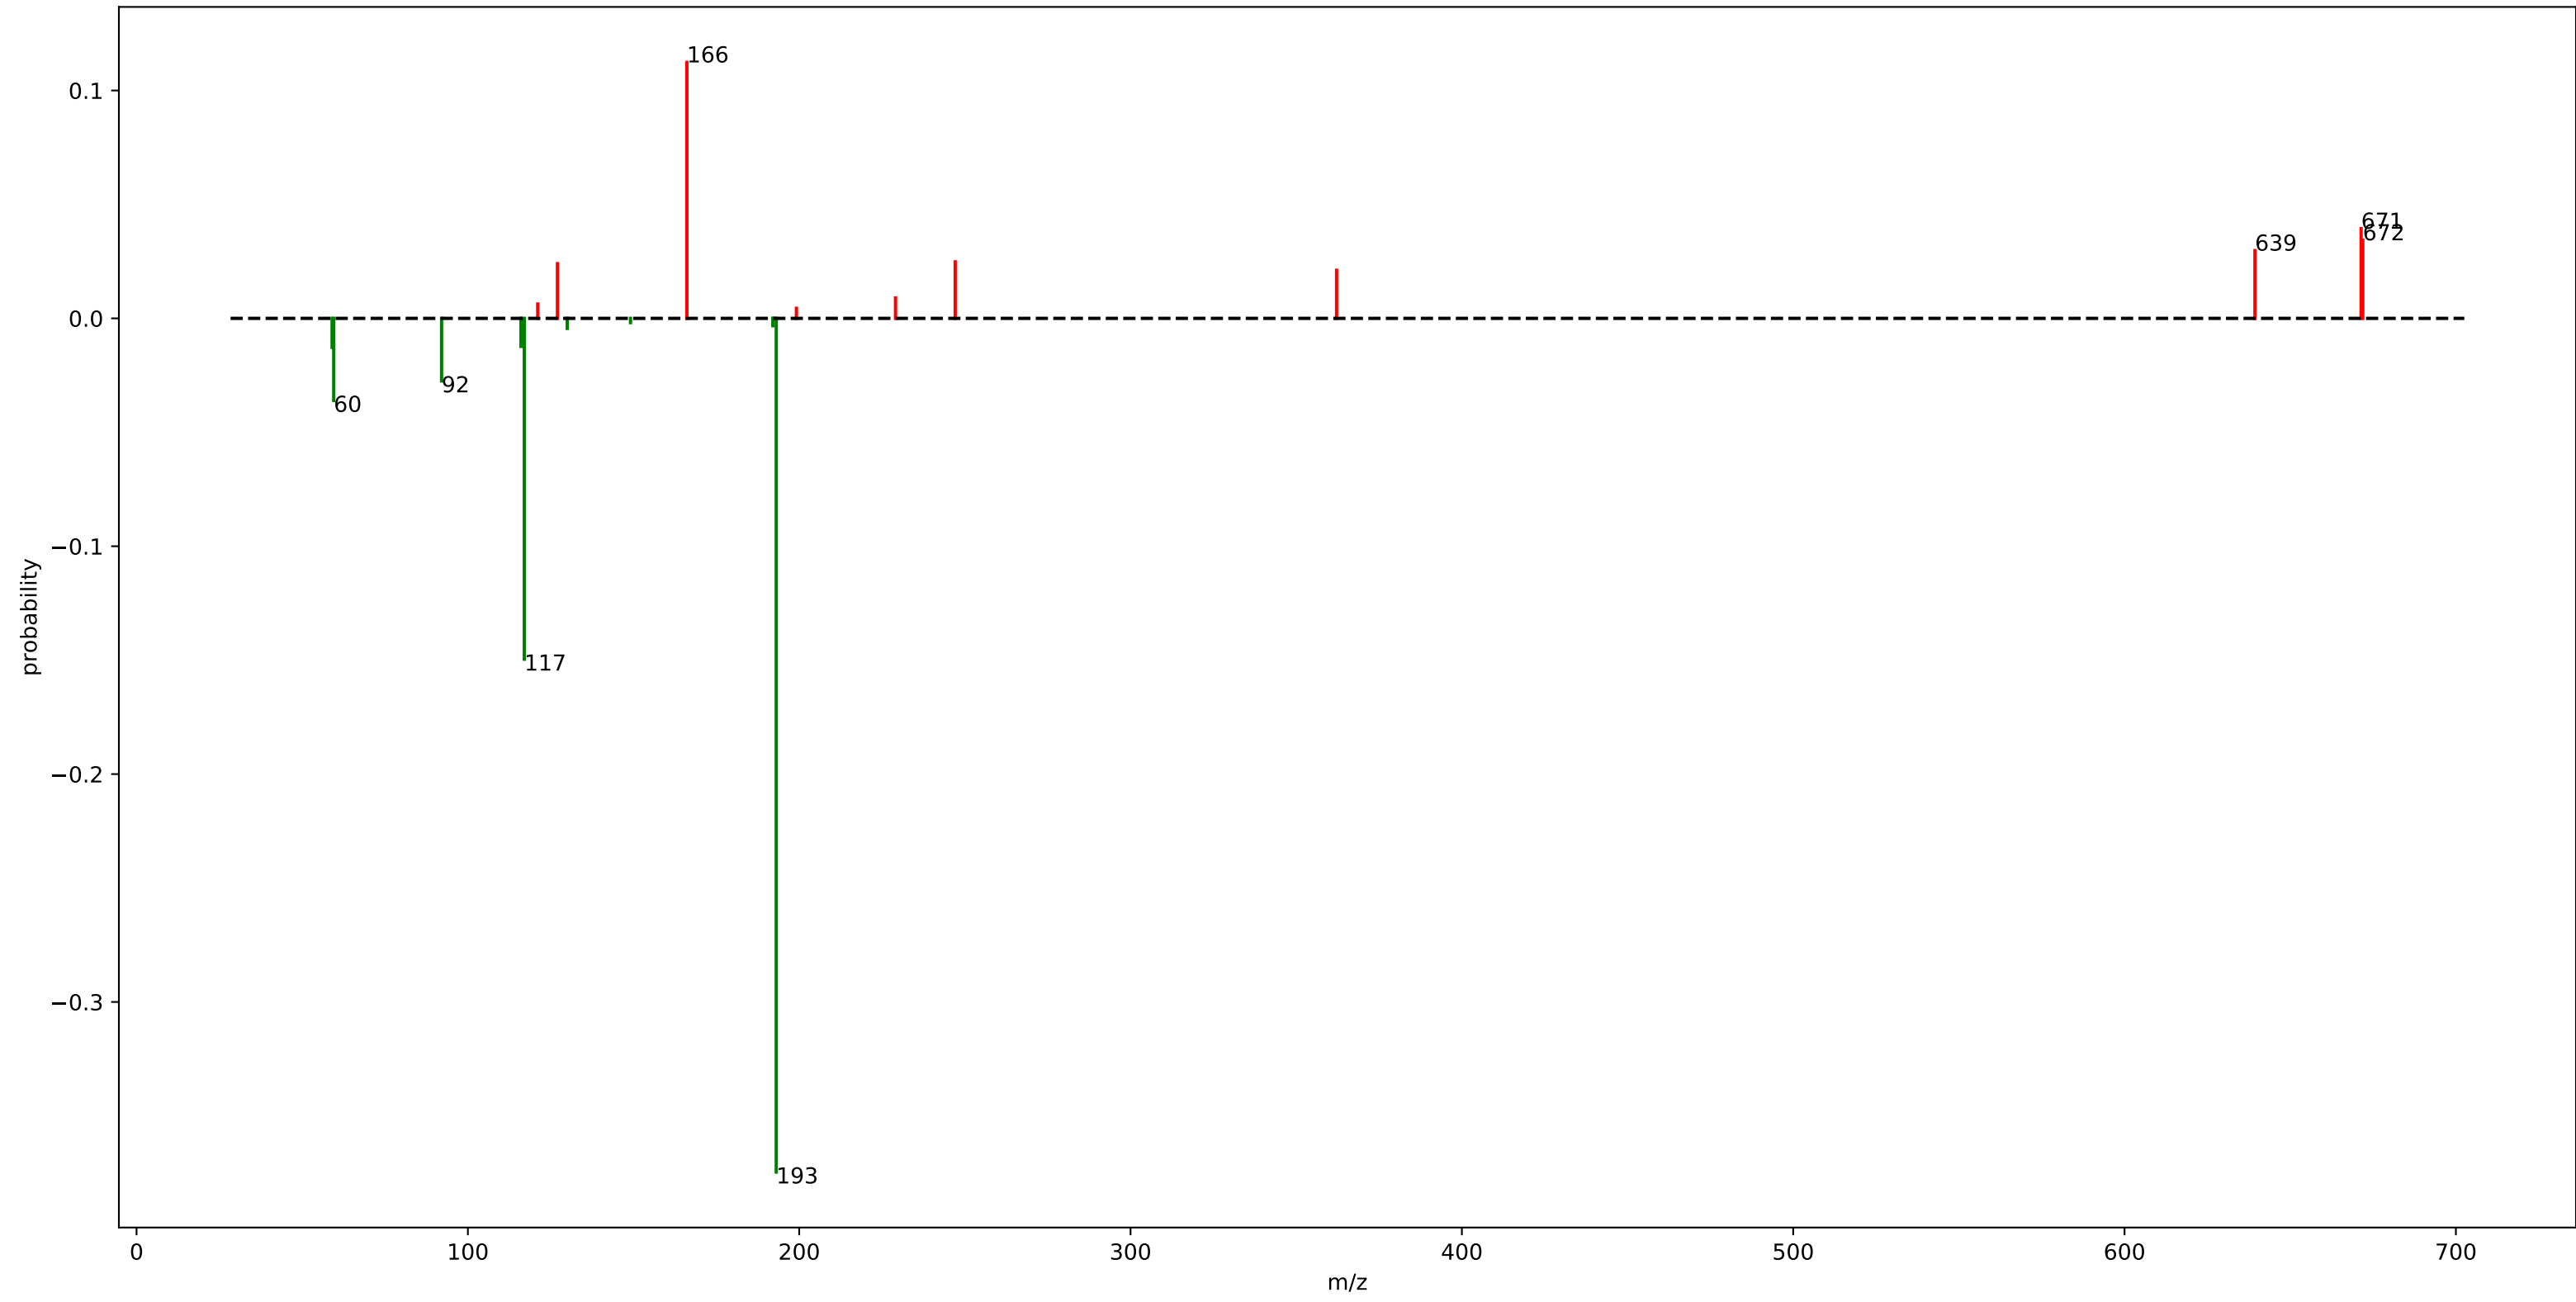

## motif\_457

|                   |        |
|-------------------|--------|
| loss_193.0725     | : 0.37 |
| loss_117.0275     | : 0.15 |
| fragment_166.0875 | : 0.11 |
| fragment_671.4025 | : 0.04 |
| loss_59.5125      | : 0.04 |
| fragment_671.9025 | : 0.03 |
| fragment_639.3575 | : 0.03 |
| loss_92.0625      | : 0.03 |
| fragment_247.0775 | : 0.02 |
| fragment_127.0375 | : 0.02 |
| fragment_362.1925 | : 0.02 |
| loss_59.0225      | : 0.01 |
| loss_116.0275     | : 0.01 |
| fragment_229.0675 | : 0.01 |
| fragment_121.0825 | : 0.01 |

StrepSalini\_motif\_250.m2m

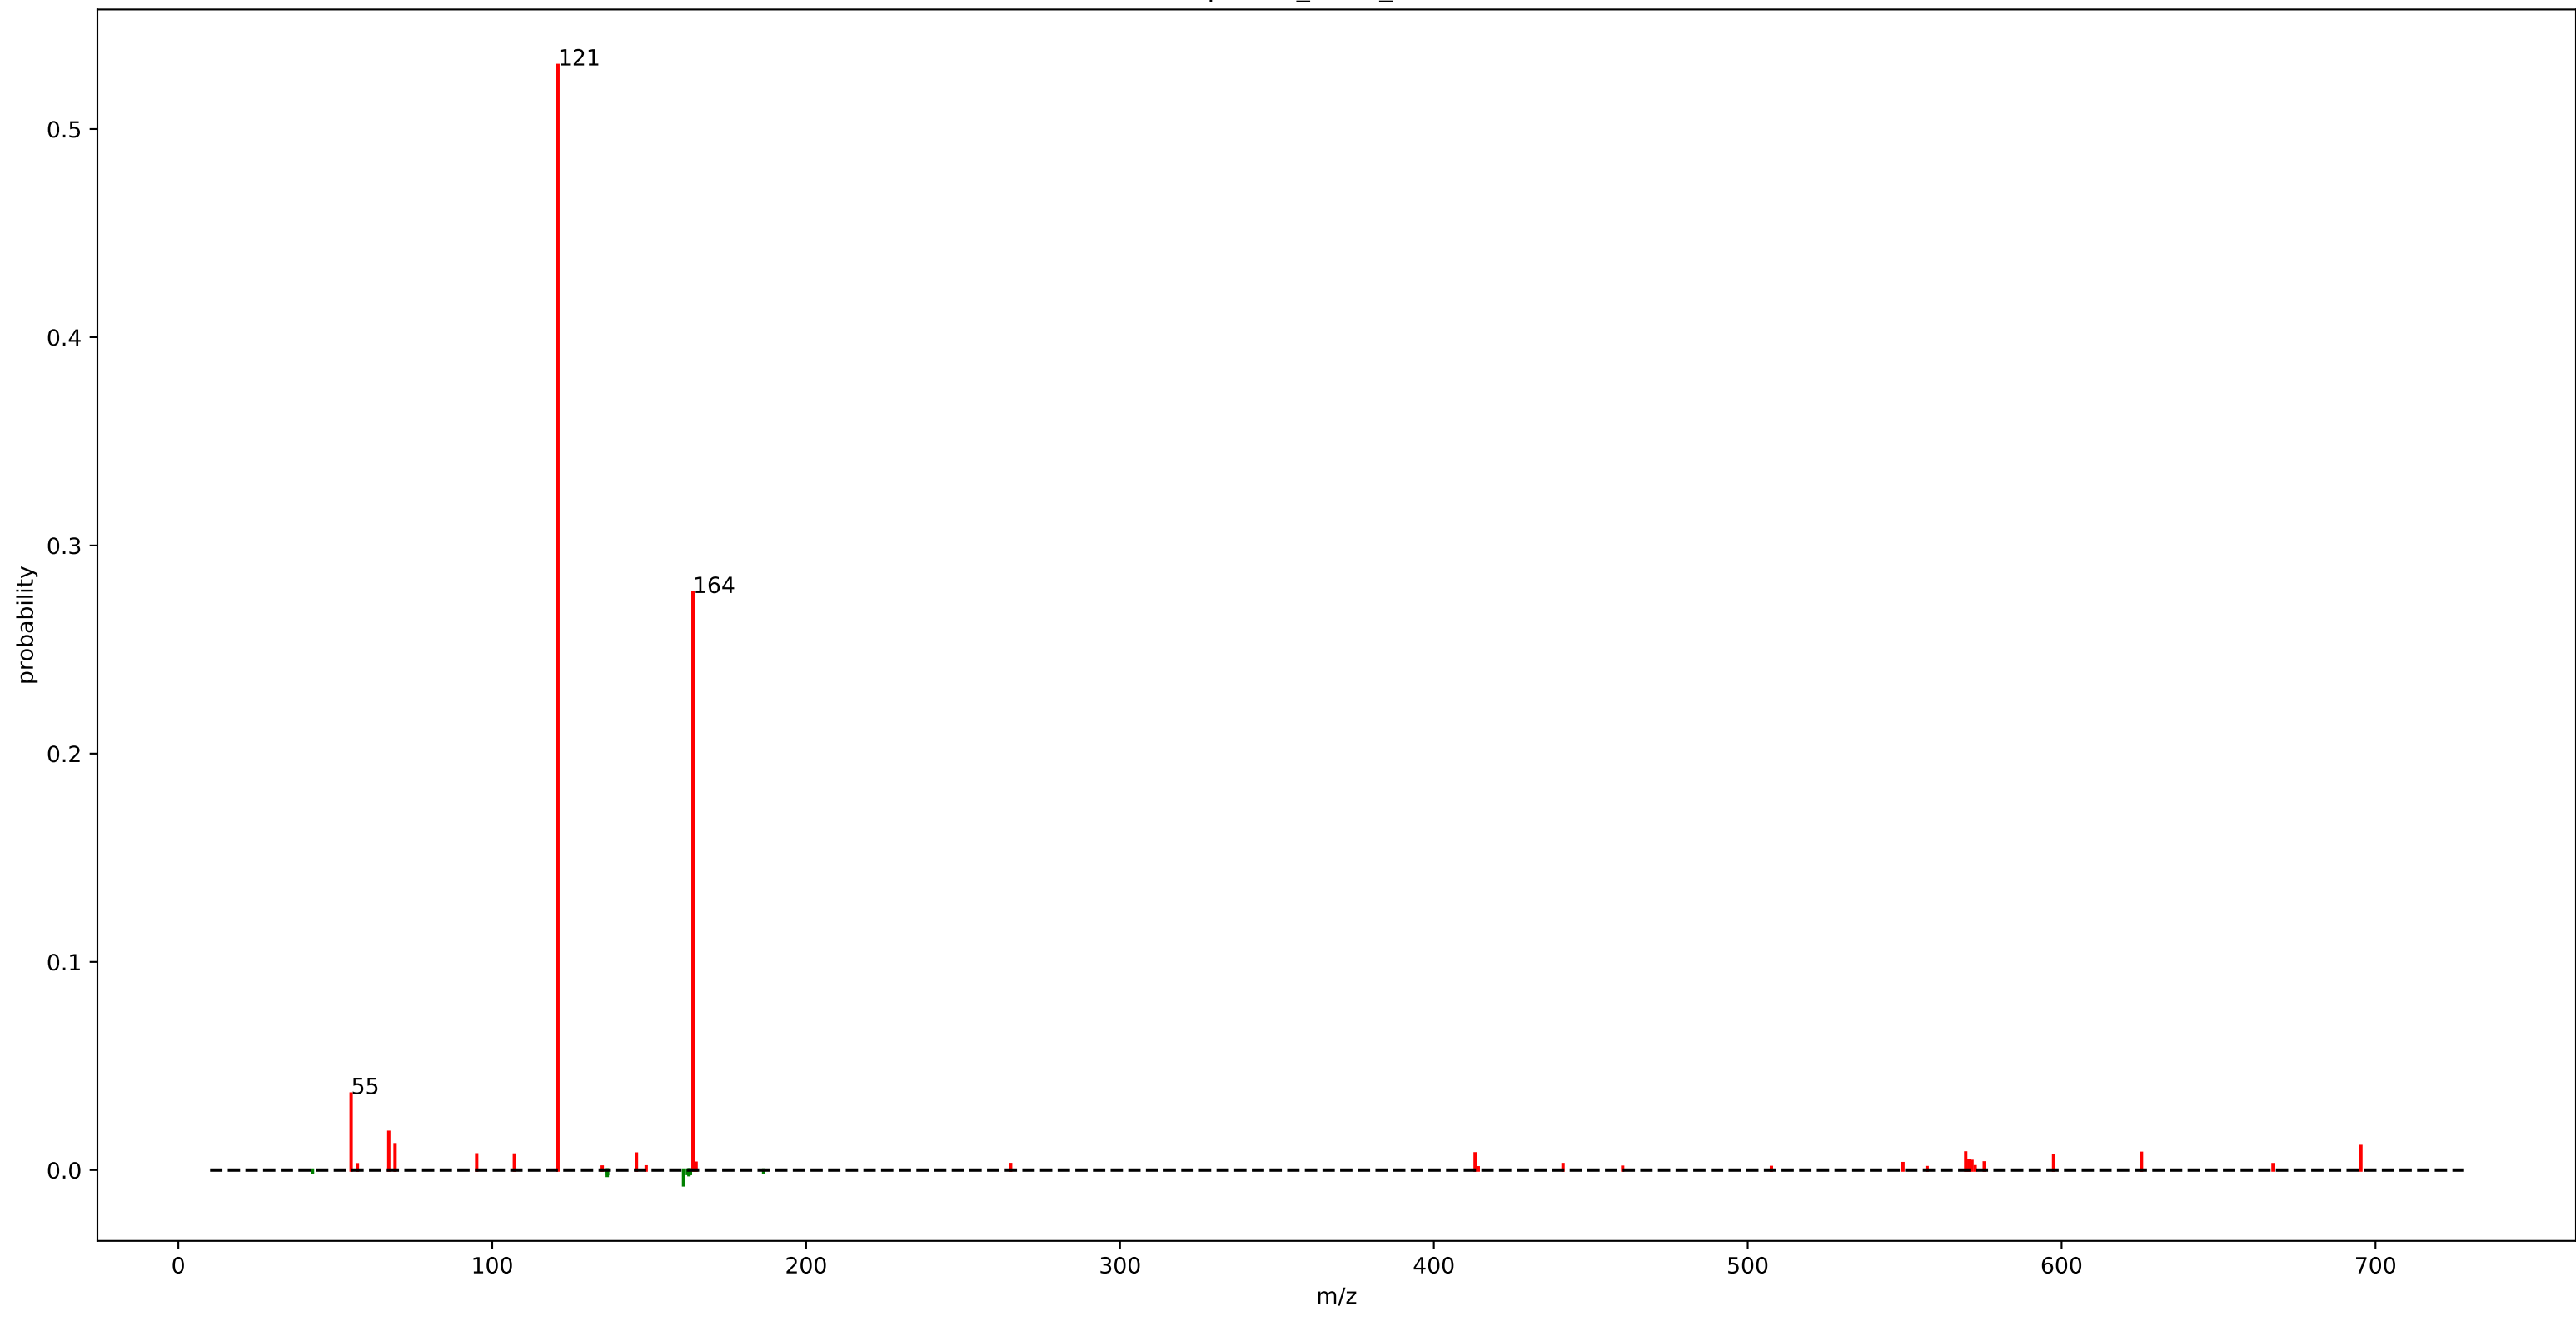

## StrepSalini\_motif\_250.m2m

|                   |        |
|-------------------|--------|
| fragment_120.9500 | : 0.53 |
| fragment_163.9500 | : 0.28 |
| fragment_55.0500  | : 0.04 |
| fragment_67.0500  | : 0.02 |
| fragment_69.0500  | : 0.01 |
| fragment_695.3500 | : 0.01 |
| fragment_569.4500 | : 0.01 |
| fragment_625.4500 | : 0.01 |
| fragment_413.1500 | : 0.01 |
| fragment_145.9500 | : 0.01 |
| fragment_95.0500  | : 0.01 |
| fragment_107.0500 | : 0.01 |
| loss_160.9500     | : 0.01 |
| fragment_597.4500 | : 0.01 |



urine\_mass2motif\_224.m2m

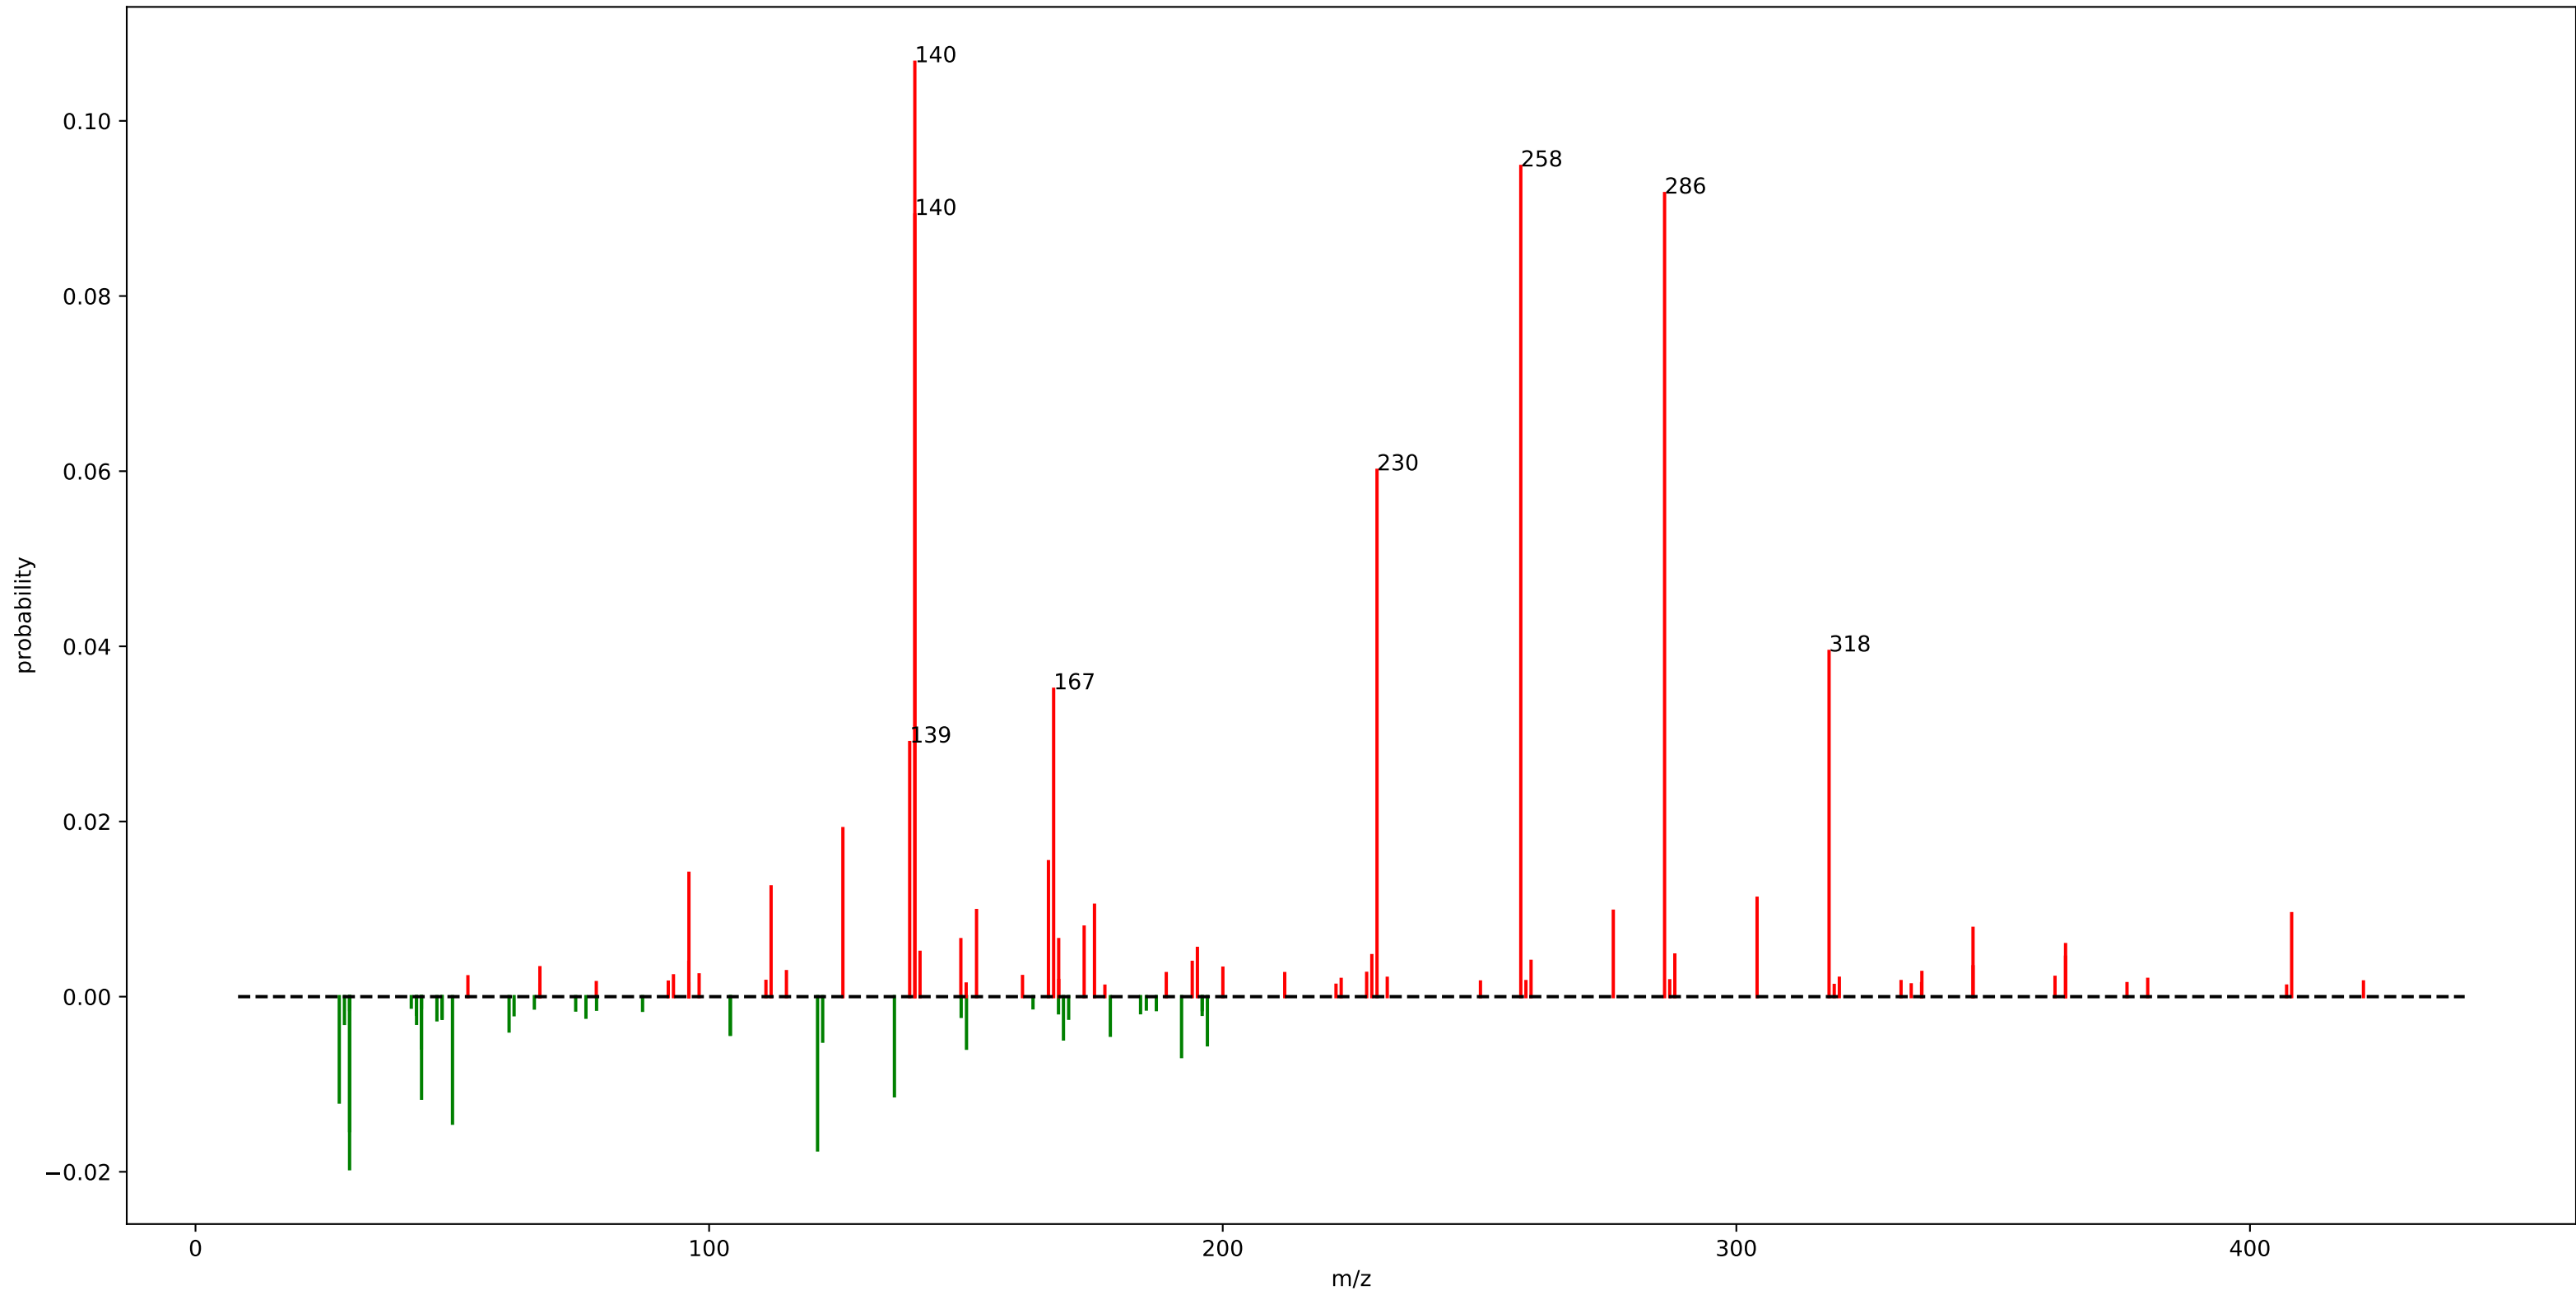

# urine\_mass2motif\_224.m2m

|                   |        |                   |        |
|-------------------|--------|-------------------|--------|
| fragment_140.0525 | : 0.11 | fragment_175.0325 | : 0.01 |
| fragment_258.0325 | : 0.09 | fragment_152.0675 | : 0.01 |
| fragment_286.0275 | : 0.09 | fragment_276.0425 | : 0.01 |
| fragment_140.0625 | : 0.09 | fragment_408.1175 | : 0.01 |
| fragment_230.0375 | : 0.06 | fragment_173.0175 | : 0.01 |
| fragment_318.0525 | : 0.04 | fragment_346.0825 | : 0.01 |
| fragment_167.0775 | : 0.04 | loss_191.9825     | : 0.01 |
| fragment_139.0525 | : 0.03 | fragment_168.0625 | : 0.01 |
| loss_29.9975      | : 0.02 | fragment_149.0125 | : 0.01 |
| fragment_126.0475 | : 0.02 | fragment_364.0975 | : 0.01 |
| loss_121.1125     | : 0.02 | loss_150.1125     | : 0.01 |
| fragment_166.0675 | : 0.02 | loss_43.9875      | : 0.01 |
| loss_30.0025      | : 0.02 | fragment_195.0675 | : 0.01 |
| loss_50.0375      | : 0.01 | loss_197.0125     | : 0.01 |
| fragment_96.0675  | : 0.01 | loss_122.1125     | : 0.01 |
| fragment_112.0675 | : 0.01 | fragment_141.0625 | : 0.01 |
| loss_27.9925      | : 0.01 |                   |        |
| loss_44.0125      | : 0.01 |                   |        |
| loss_136.0775     | : 0.01 |                   |        |
| fragment_304.0375 | : 0.01 |                   |        |

urine\_mass2motif\_56.m2m

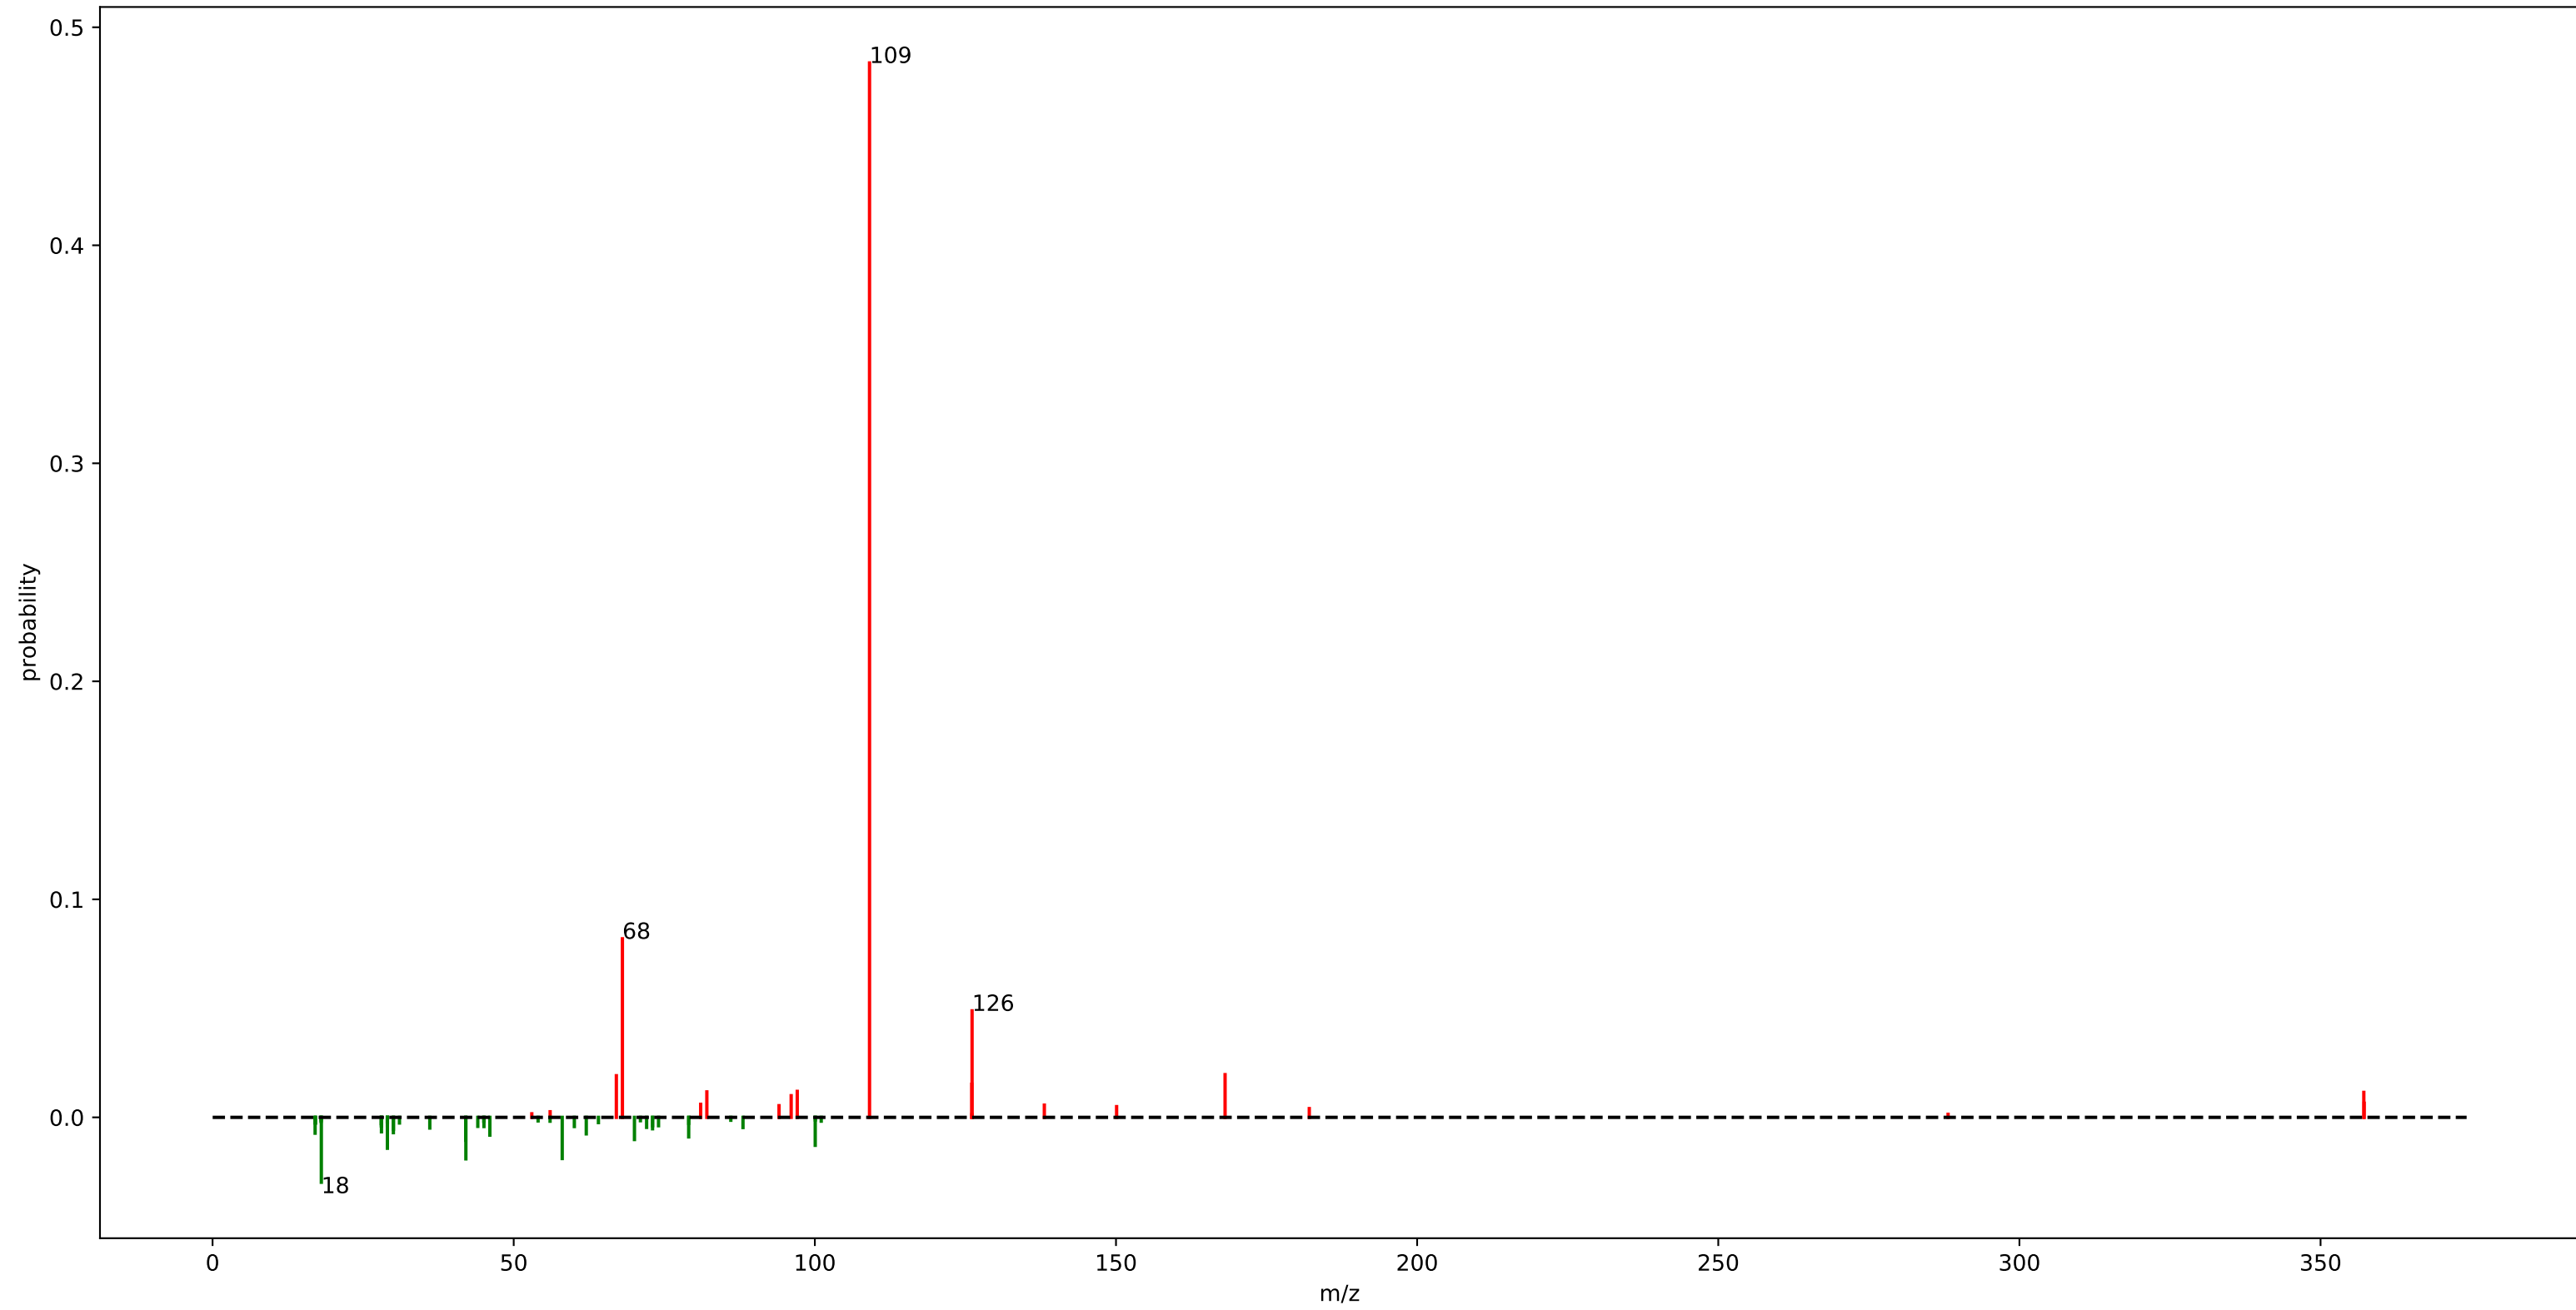

## urine\_mass2motif\_56.m2m

|                   |        |                   |        |
|-------------------|--------|-------------------|--------|
| fragment_109.0775 | : 0.48 | loss_17.0275      | : 0.01 |
| fragment_68.0475  | : 0.08 | loss_30.0225      | : 0.01 |
| fragment_126.1025 | : 0.05 | loss_28.0425      | : 0.01 |
| loss_18.0575      | : 0.03 | fragment_357.2425 | : 0.01 |
| fragment_168.1125 | : 0.02 | fragment_81.0425  | : 0.01 |
| fragment_67.0425  | : 0.02 | fragment_138.1025 | : 0.01 |
| loss_42.0575      | : 0.02 | loss_30.0325      | : 0.01 |
| loss_58.0525      | : 0.02 | fragment_94.0525  | : 0.01 |
| fragment_126.0525 | : 0.02 | loss_73.0525      | : 0.01 |
| loss_29.0275      | : 0.01 |                   |        |
| loss_100.0625     | : 0.01 |                   |        |
| fragment_97.0775  | : 0.01 |                   |        |
| fragment_82.0675  | : 0.01 |                   |        |
| fragment_357.1825 | : 0.01 |                   |        |
| loss_42.0325      | : 0.01 |                   |        |
| loss_70.0475      | : 0.01 |                   |        |
| fragment_96.0675  | : 0.01 |                   |        |
| loss_79.0525      | : 0.01 |                   |        |
| loss_46.0375      | : 0.01 |                   |        |
| loss_62.0475      | : 0.01 |                   |        |

euphorbia\_motif\_421.m2m

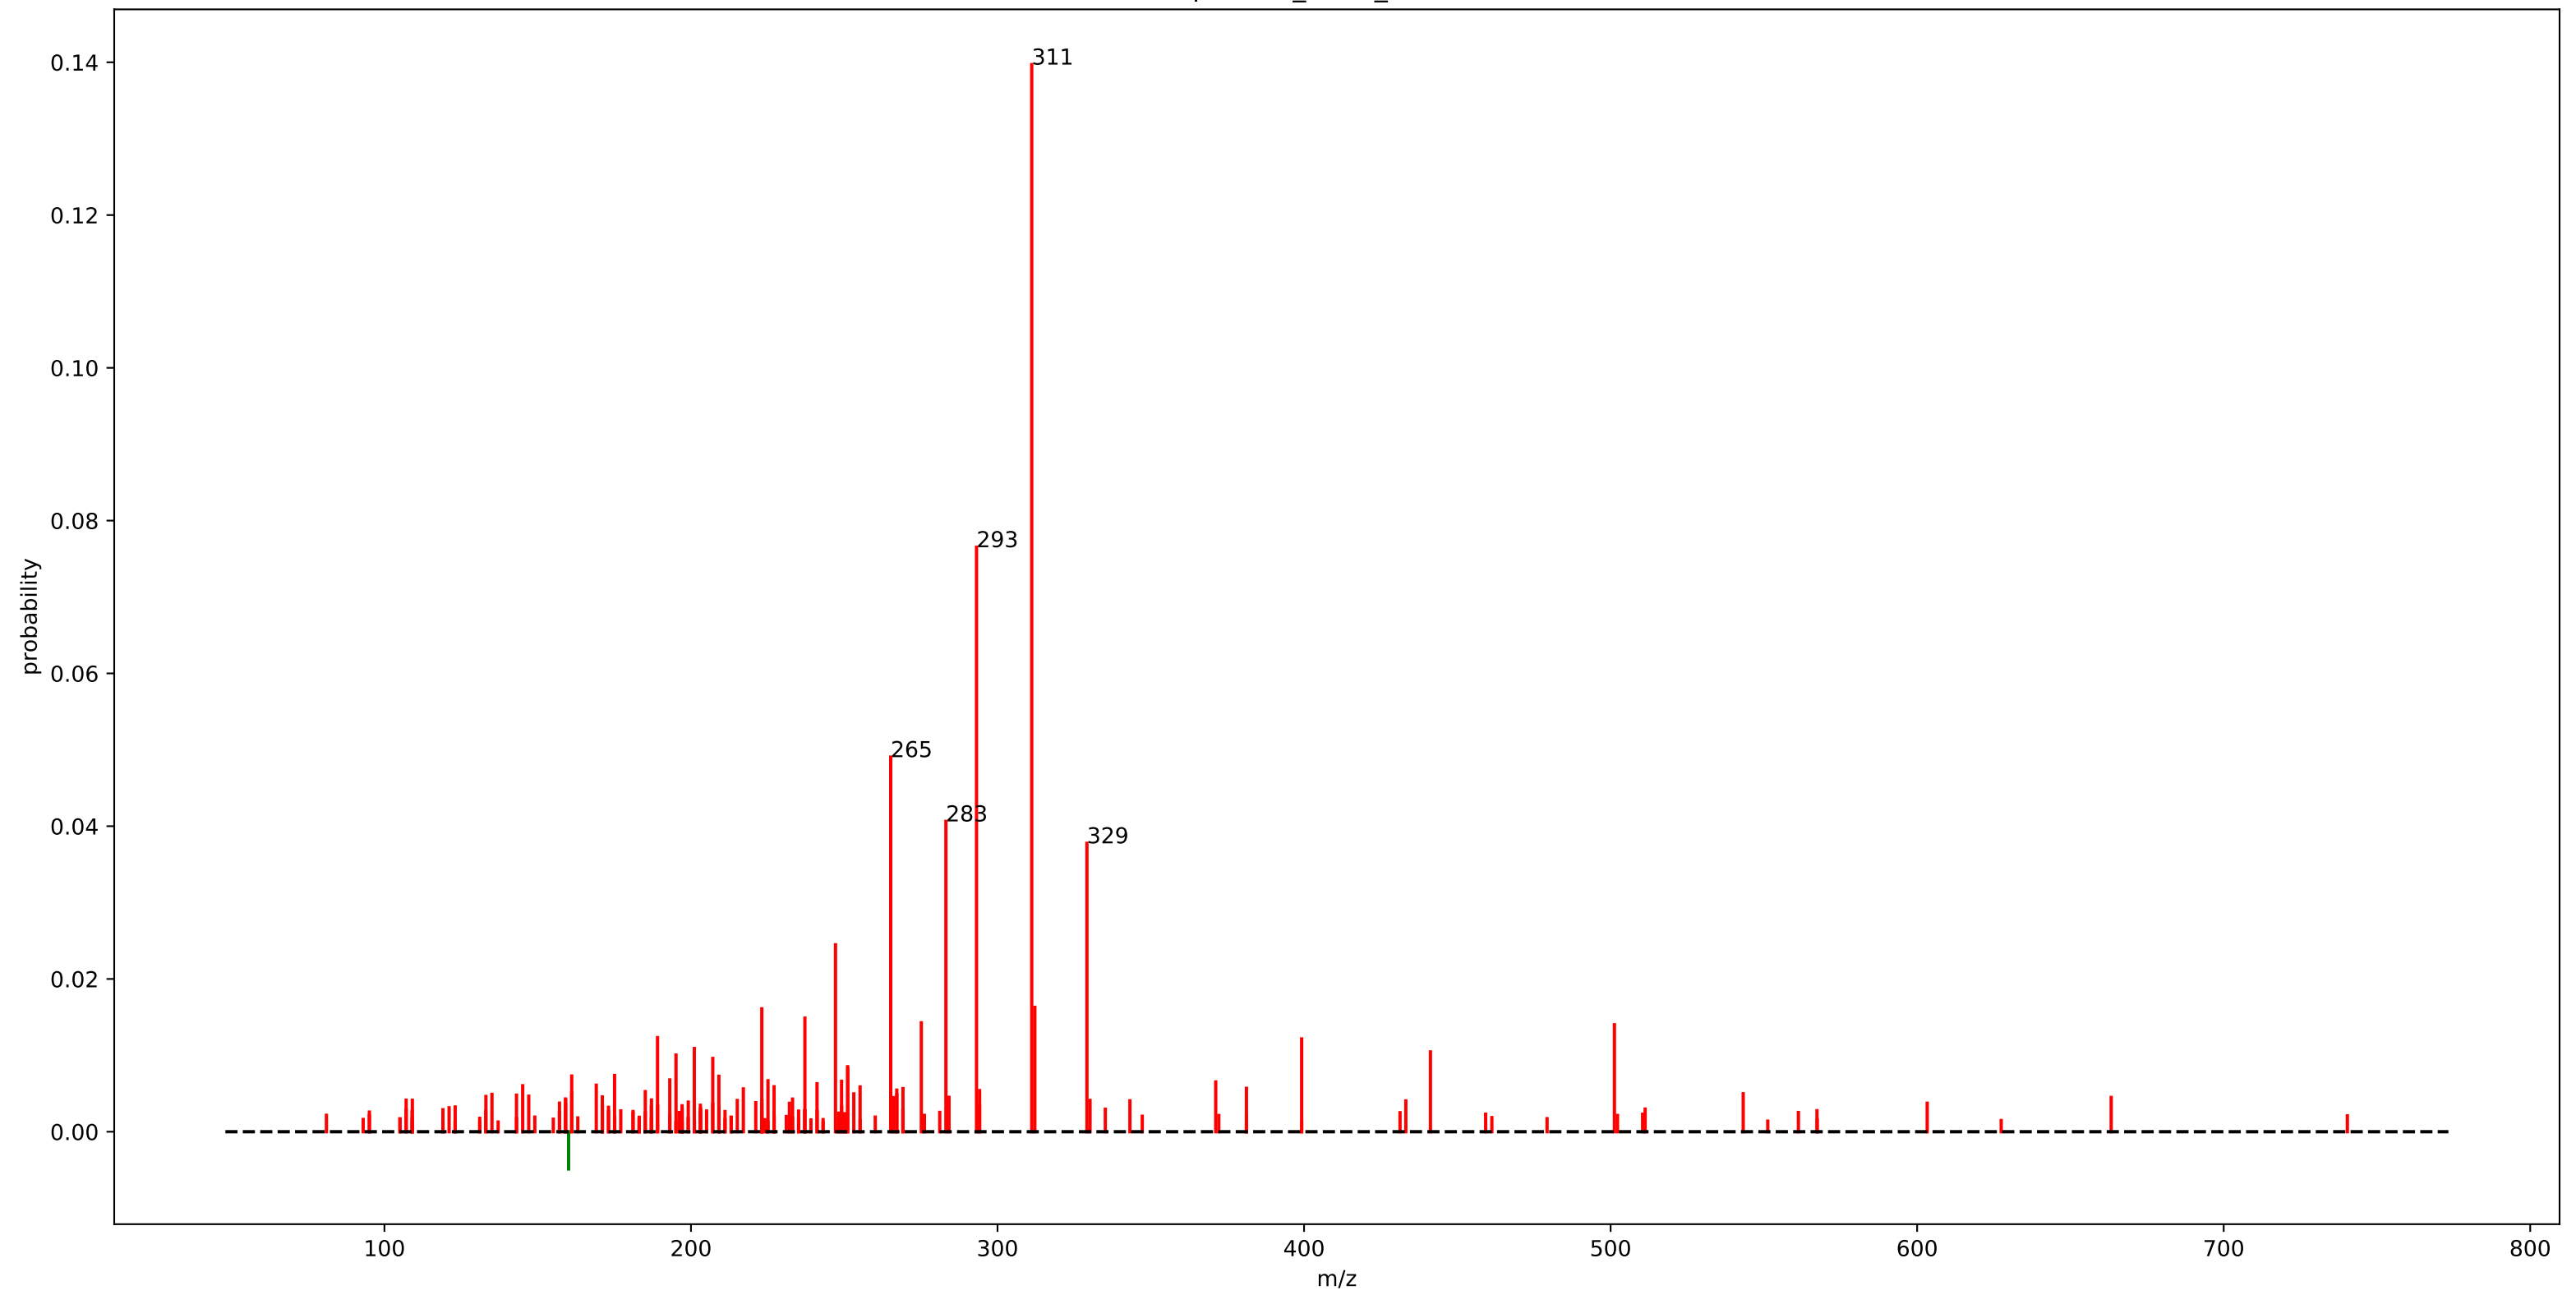

# euphorbia\_motif\_421.m2m

|                   |        |                   |        |
|-------------------|--------|-------------------|--------|
| fragment_311.1625 | : 0.14 | fragment_161.0925 | : 0.01 |
| fragment_293.1525 | : 0.08 | fragment_209.0975 | : 0.01 |
| fragment_265.1575 | : 0.05 | fragment_193.0875 | : 0.01 |
| fragment_283.1675 | : 0.04 | fragment_225.1225 | : 0.01 |
| fragment_329.1725 | : 0.04 | fragment_249.1275 | : 0.01 |
| fragment_247.1475 | : 0.02 | fragment_371.1825 | : 0.01 |
| fragment_312.1675 | : 0.02 | fragment_241.1225 | : 0.01 |
| fragment_223.1075 | : 0.02 | fragment_169.1025 | : 0.01 |
| fragment_237.1625 | : 0.01 | fragment_145.1025 | : 0.01 |
| fragment_275.1425 | : 0.01 | fragment_227.1075 | : 0.01 |
| fragment_501.2475 | : 0.01 | fragment_255.1725 | : 0.01 |
| fragment_189.0925 | : 0.01 | fragment_381.2025 | : 0.01 |
| fragment_399.2175 | : 0.01 | fragment_269.1525 | : 0.01 |
| fragment_201.0875 | : 0.01 | fragment_217.0875 | : 0.01 |
| fragment_441.2275 | : 0.01 | fragment_267.1325 | : 0.01 |
| fragment_195.1175 | : 0.01 | fragment_294.1575 | : 0.01 |
| fragment_207.1075 | : 0.01 | fragment_185.0975 | : 0.01 |
| fragment_251.1075 | : 0.01 | fragment_161.0975 | : 0.01 |
| fragment_251.1425 | : 0.01 |                   |        |
| fragment_175.0725 | : 0.01 |                   |        |

urine\_mass2motif\_152.m2m

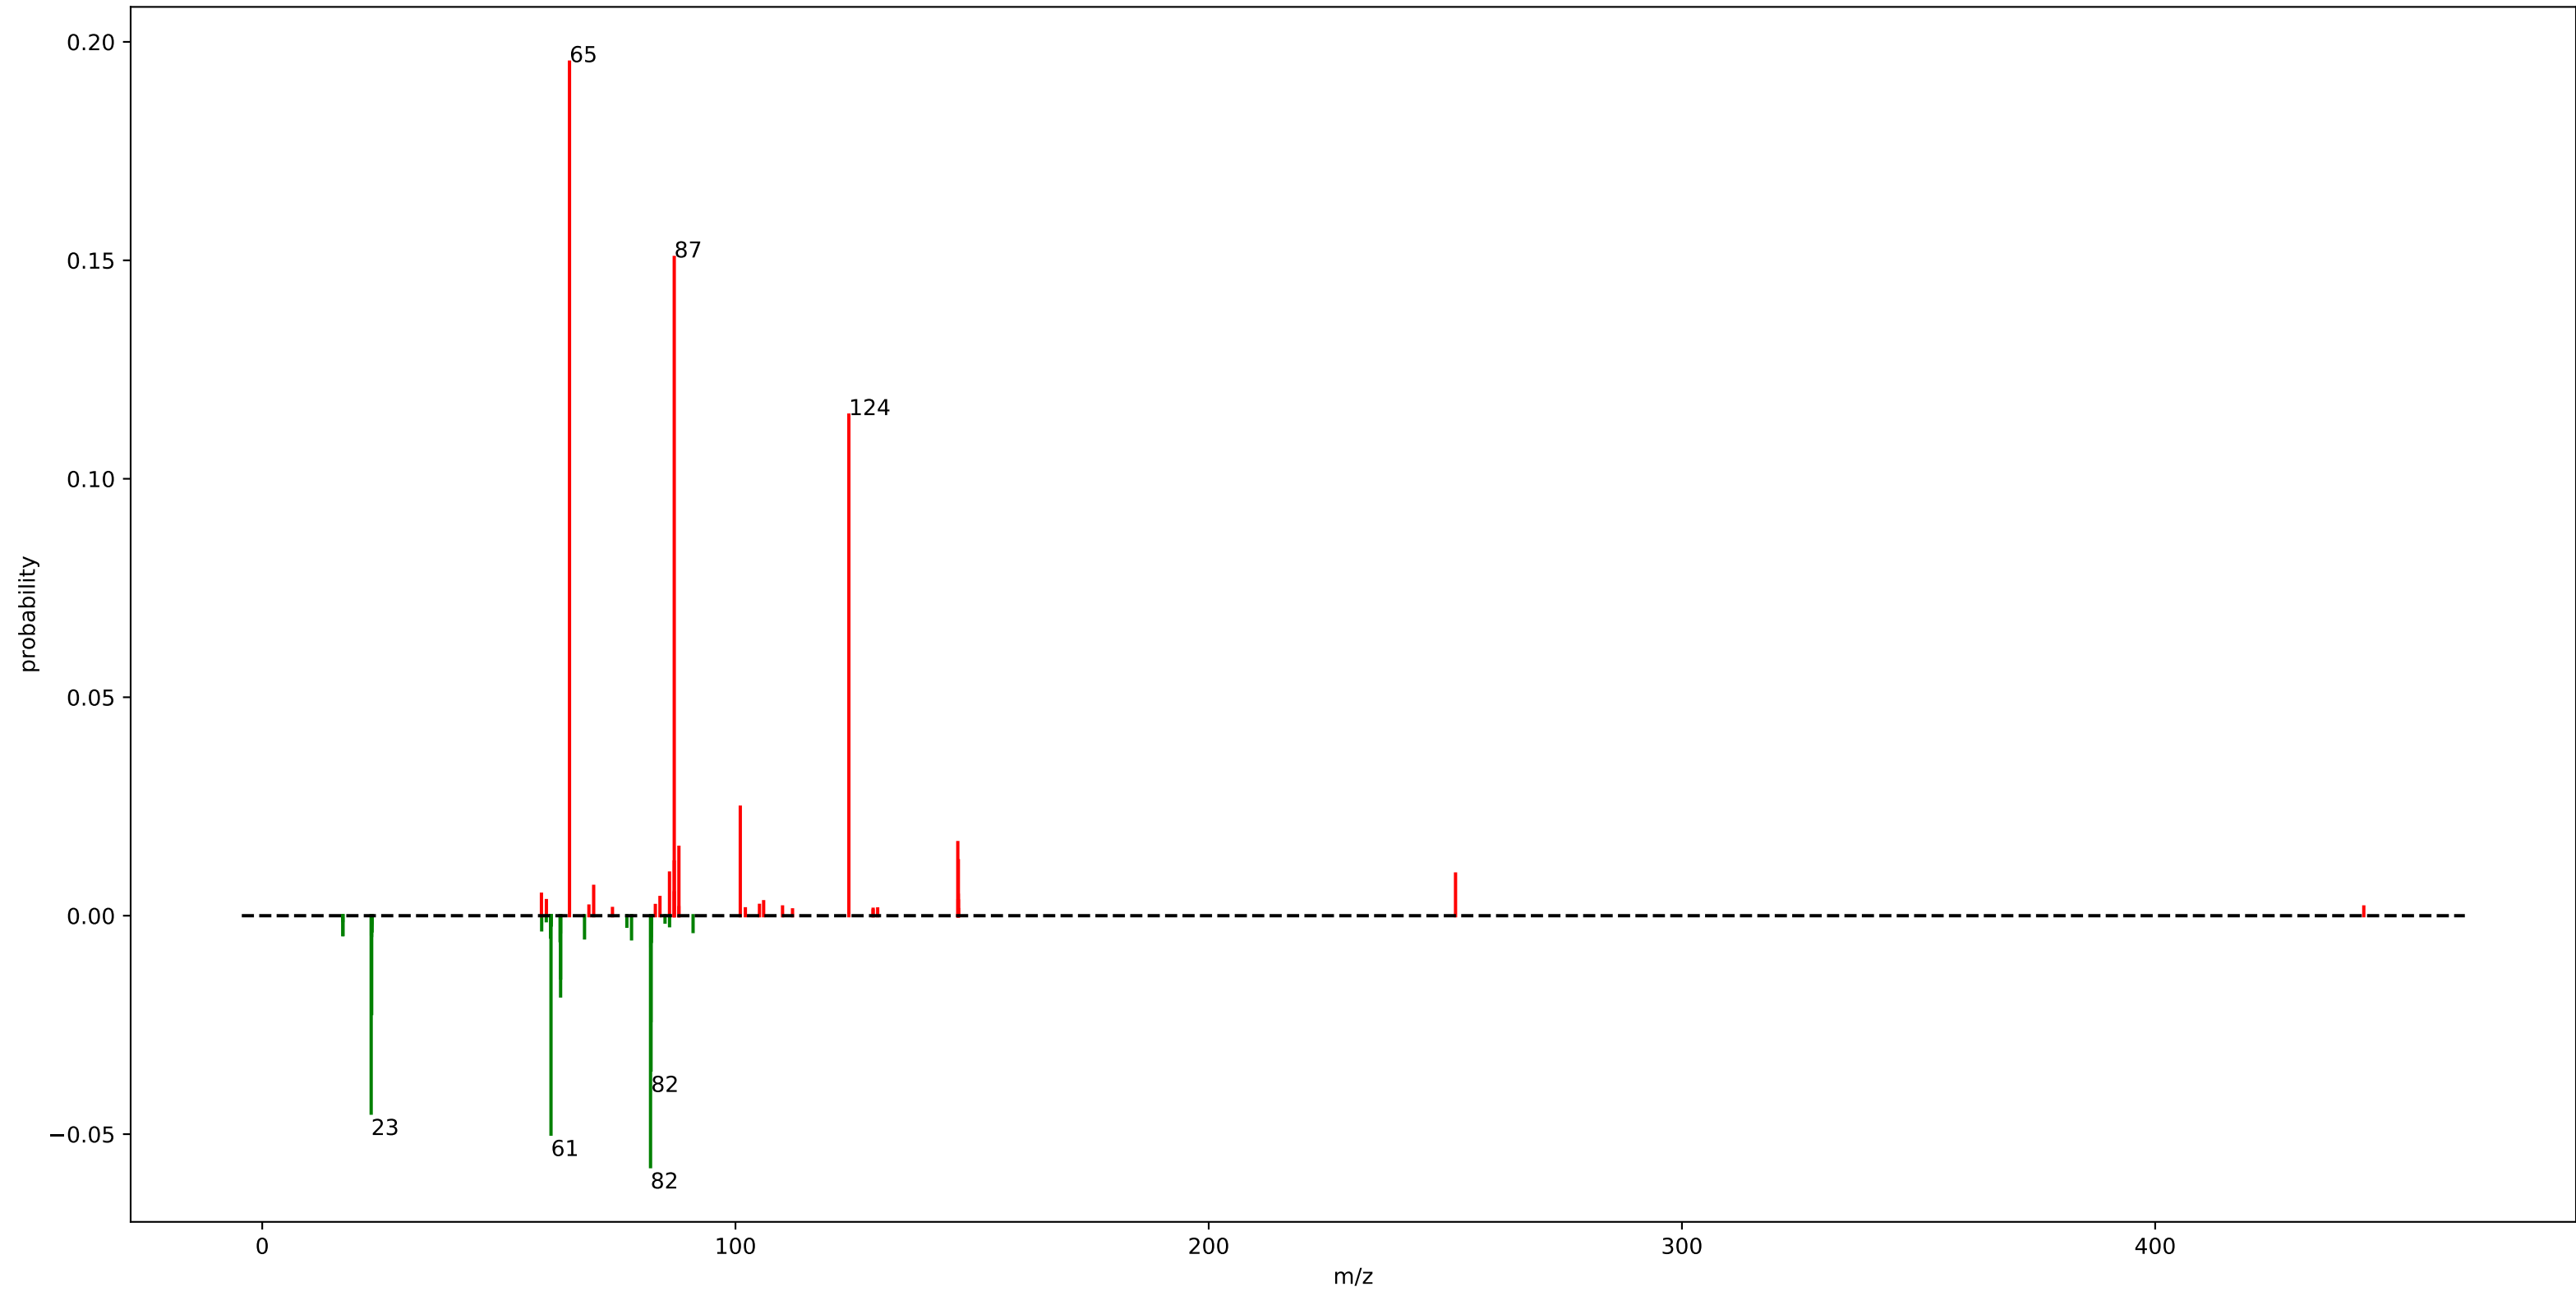

# urine\_mass2motif\_152.m2m

|                   |        |                  |        |
|-------------------|--------|------------------|--------|
| fragment_64.9275  | : 0.20 | loss_82.2225     | : 0.01 |
| fragment_87.0625  | : 0.15 | loss_82.1375     | : 0.01 |
| fragment_123.9625 | : 0.11 | loss_62.9375     | : 0.01 |
| loss_82.0525      | : 0.06 | loss_78.0375     | : 0.01 |
| loss_61.0175      | : 0.05 | fragment_87.0425 | : 0.01 |
| loss_23.0175      | : 0.05 | loss_68.1025     | : 0.01 |
| loss_82.1575      | : 0.04 |                  |        |
| fragment_101.0175 | : 0.02 |                  |        |
| loss_82.1475      | : 0.02 |                  |        |
| loss_23.1225      | : 0.02 |                  |        |
| loss_63.0475      | : 0.02 |                  |        |
| fragment_146.9825 | : 0.02 |                  |        |
| fragment_88.0475  | : 0.02 |                  |        |
| loss_63.0525      | : 0.01 |                  |        |
| fragment_147.0975 | : 0.01 |                  |        |
| fragment_87.0575  | : 0.01 |                  |        |
| fragment_86.0575  | : 0.01 |                  |        |
| fragment_252.1575 | : 0.01 |                  |        |
| loss_82.0975      | : 0.01 |                  |        |
| fragment_70.0375  | : 0.01 |                  |        |



urine\_mass2motif\_104.m2m

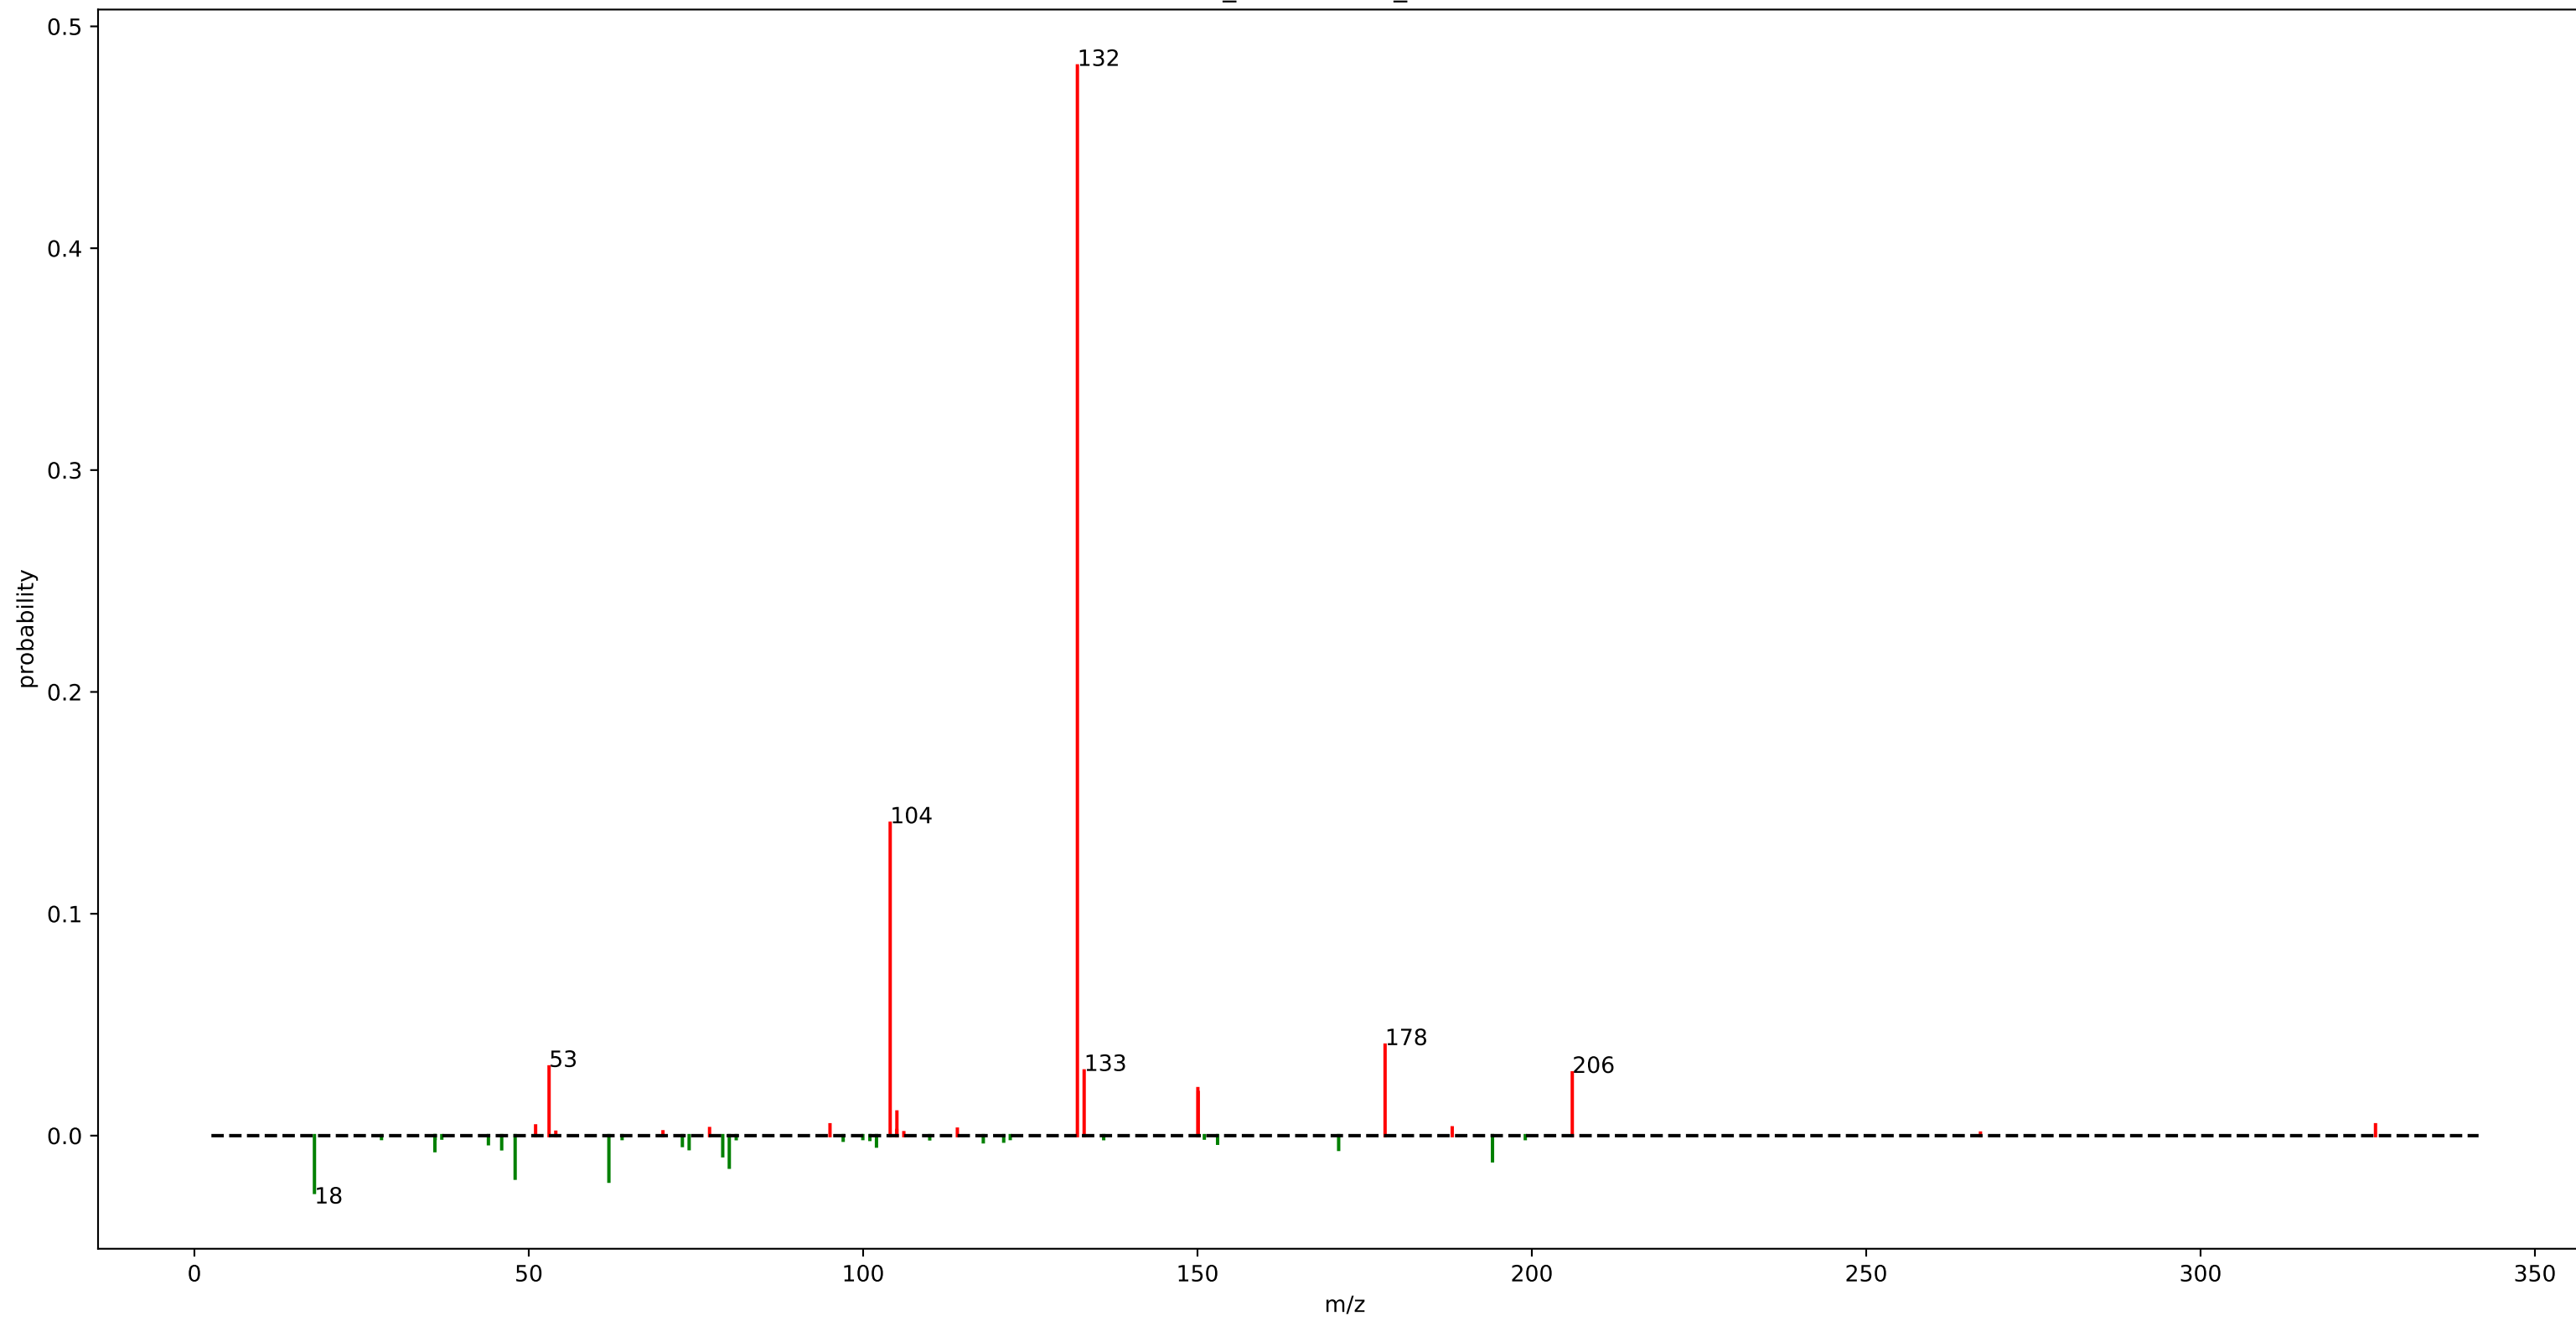

## urine\_mass2motif\_104.m2m

|                   |        |
|-------------------|--------|
| fragment_132.0425 | : 0.48 |
| fragment_104.0475 | : 0.14 |
| fragment_178.0525 | : 0.04 |
| fragment_53.0375  | : 0.03 |
| fragment_133.0525 | : 0.03 |
| fragment_206.0475 | : 0.03 |
| loss_17.9525      | : 0.03 |
| fragment_150.0575 | : 0.02 |
| loss_61.9825      | : 0.02 |
| fragment_150.1125 | : 0.02 |
| loss_47.9625      | : 0.02 |
| loss_79.9875      | : 0.01 |
| loss_194.1175     | : 0.01 |
| fragment_105.0525 | : 0.01 |
| loss_79.0075      | : 0.01 |
| loss_35.9625      | : 0.01 |
| loss_171.1125     | : 0.01 |
| loss_45.9525      | : 0.01 |
| loss_73.9825      | : 0.01 |

motif\_453

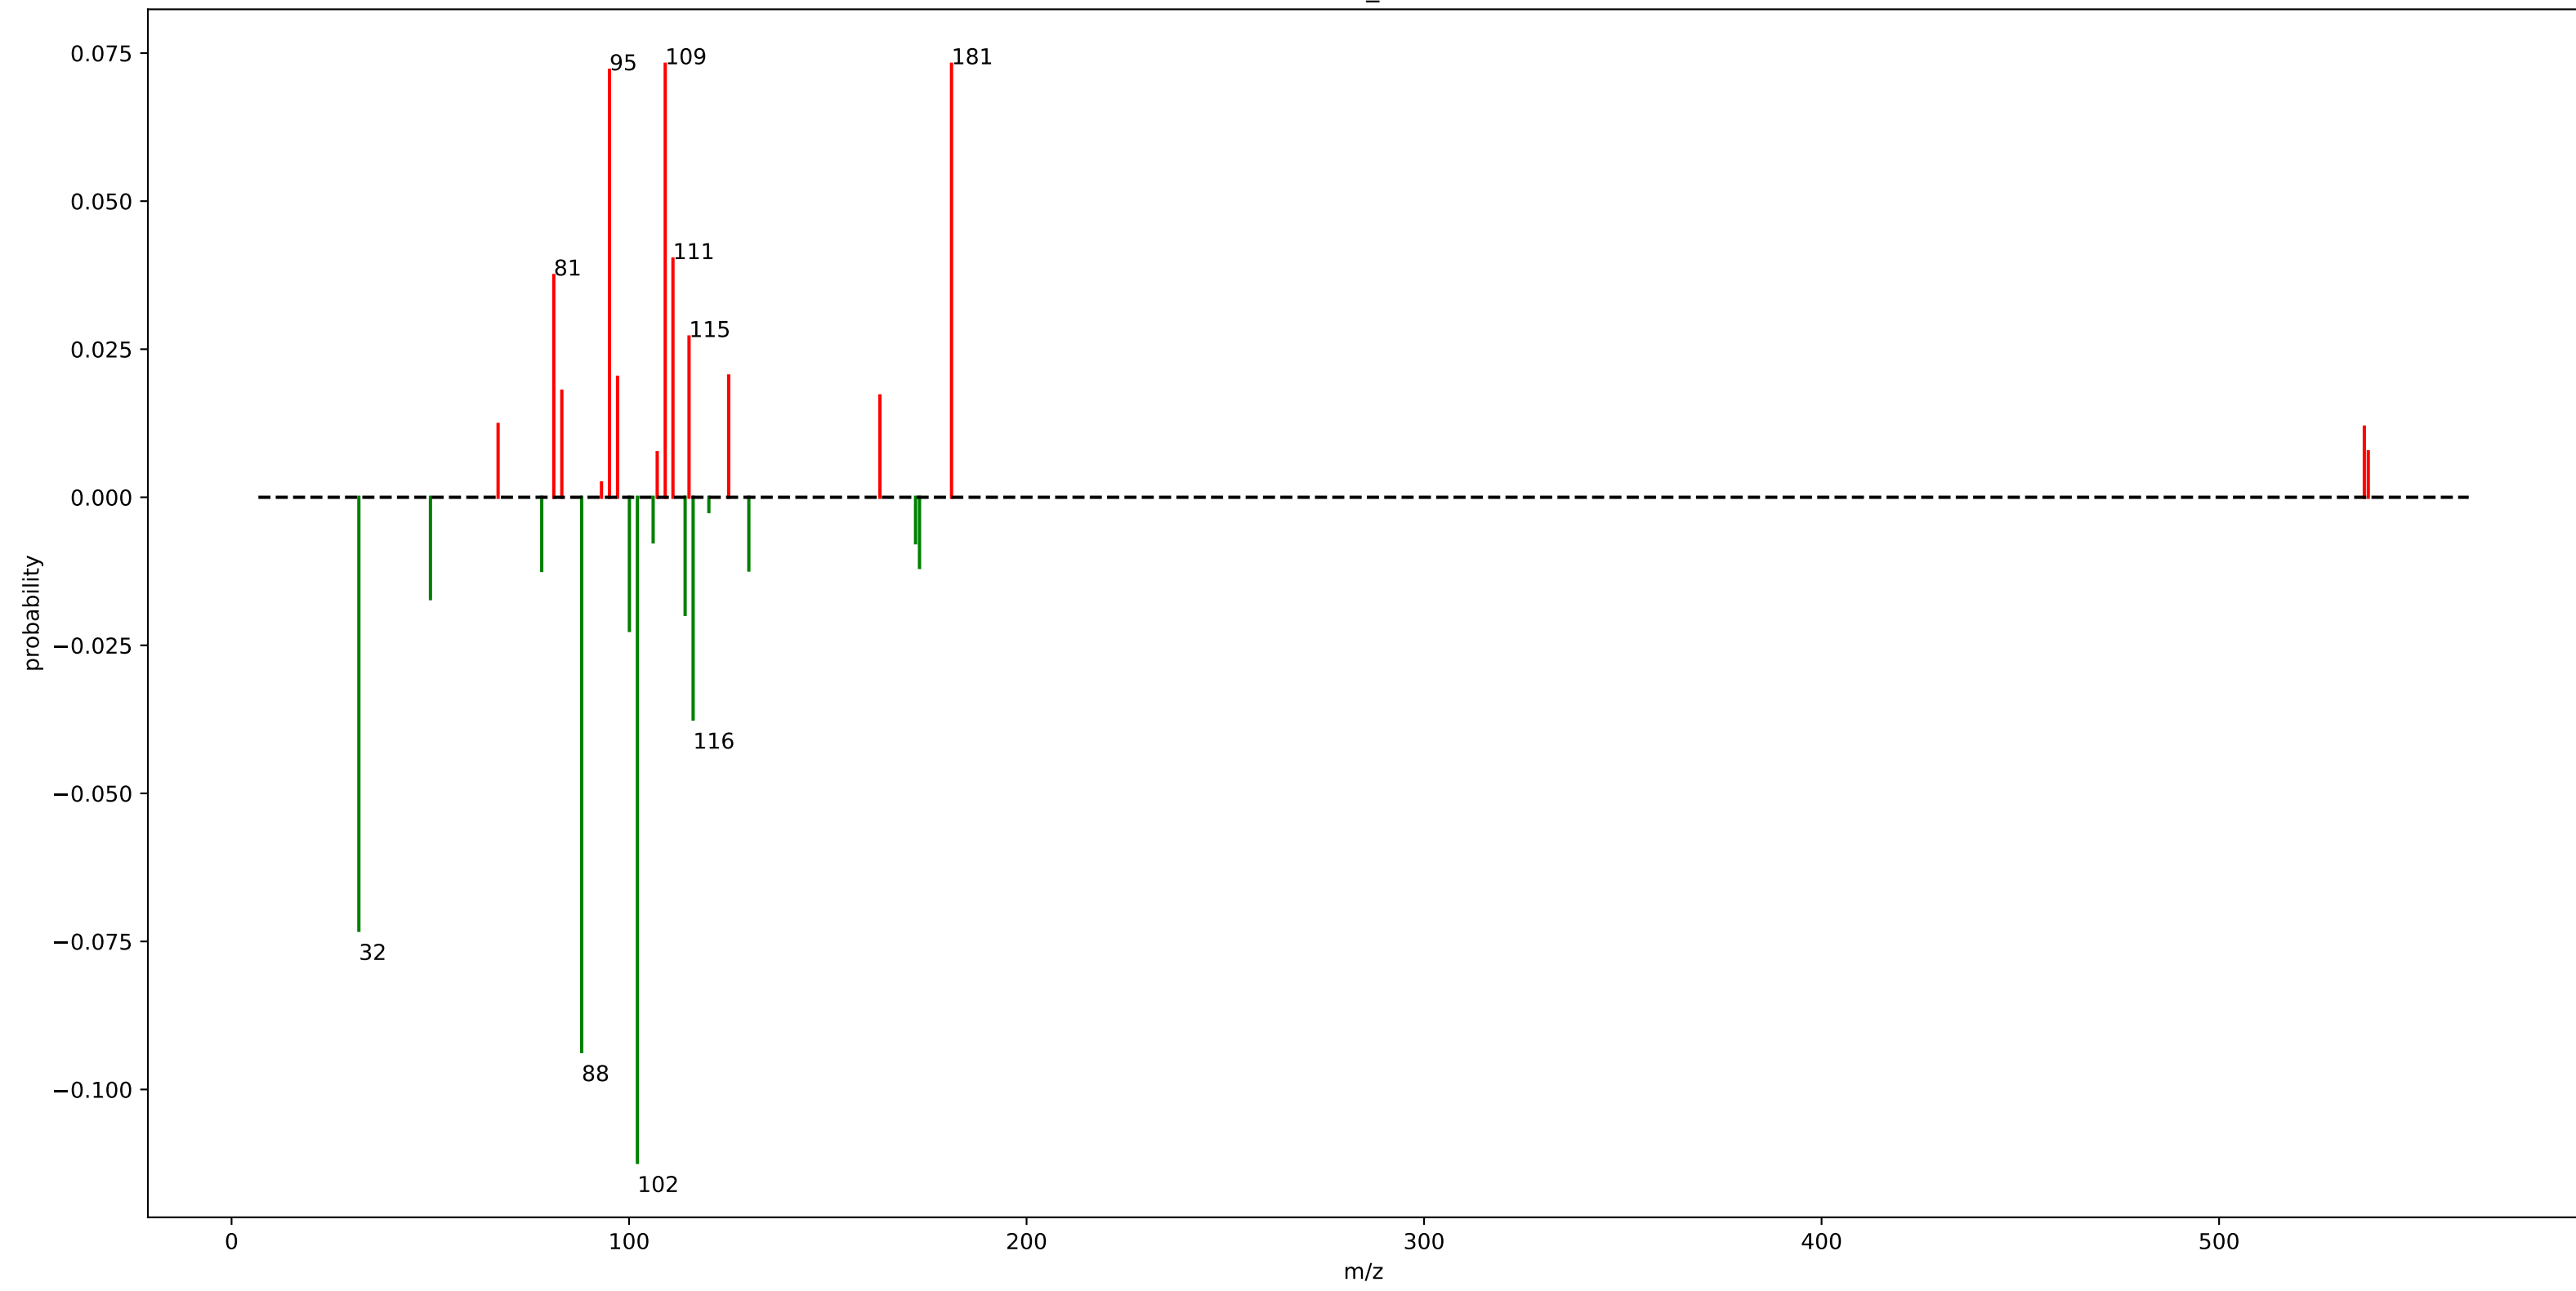

# motif\_453

|                   |        |                   |        |
|-------------------|--------|-------------------|--------|
| loss_102.1025     | : 0.11 | loss_173.0675     | : 0.01 |
| loss_88.0875      | : 0.09 | fragment_536.5375 | : 0.01 |
| fragment_109.0975 | : 0.07 | loss_172.0775     | : 0.01 |
| loss_32.0275      | : 0.07 | fragment_537.5325 | : 0.01 |
| fragment_181.1225 | : 0.07 | loss_106.0625     | : 0.01 |
| fragment_95.0825  | : 0.07 | fragment_107.0825 | : 0.01 |
| fragment_111.0425 | : 0.04 |                   |        |
| loss_116.1175     | : 0.04 |                   |        |
| fragment_81.0675  | : 0.04 |                   |        |
| fragment_115.0875 | : 0.03 |                   |        |
| loss_100.0875     | : 0.02 |                   |        |
| fragment_125.0575 | : 0.02 |                   |        |
| fragment_97.1025  | : 0.02 |                   |        |
| loss_114.1025     | : 0.02 |                   |        |
| fragment_83.0825  | : 0.02 |                   |        |
| fragment_163.1125 | : 0.02 |                   |        |
| loss_50.0375      | : 0.02 |                   |        |
| loss_78.0325      | : 0.01 |                   |        |
| fragment_67.0525  | : 0.01 |                   |        |
| loss_130.1325     | : 0.01 |                   |        |

urine\_mass2motif\_111.m2m

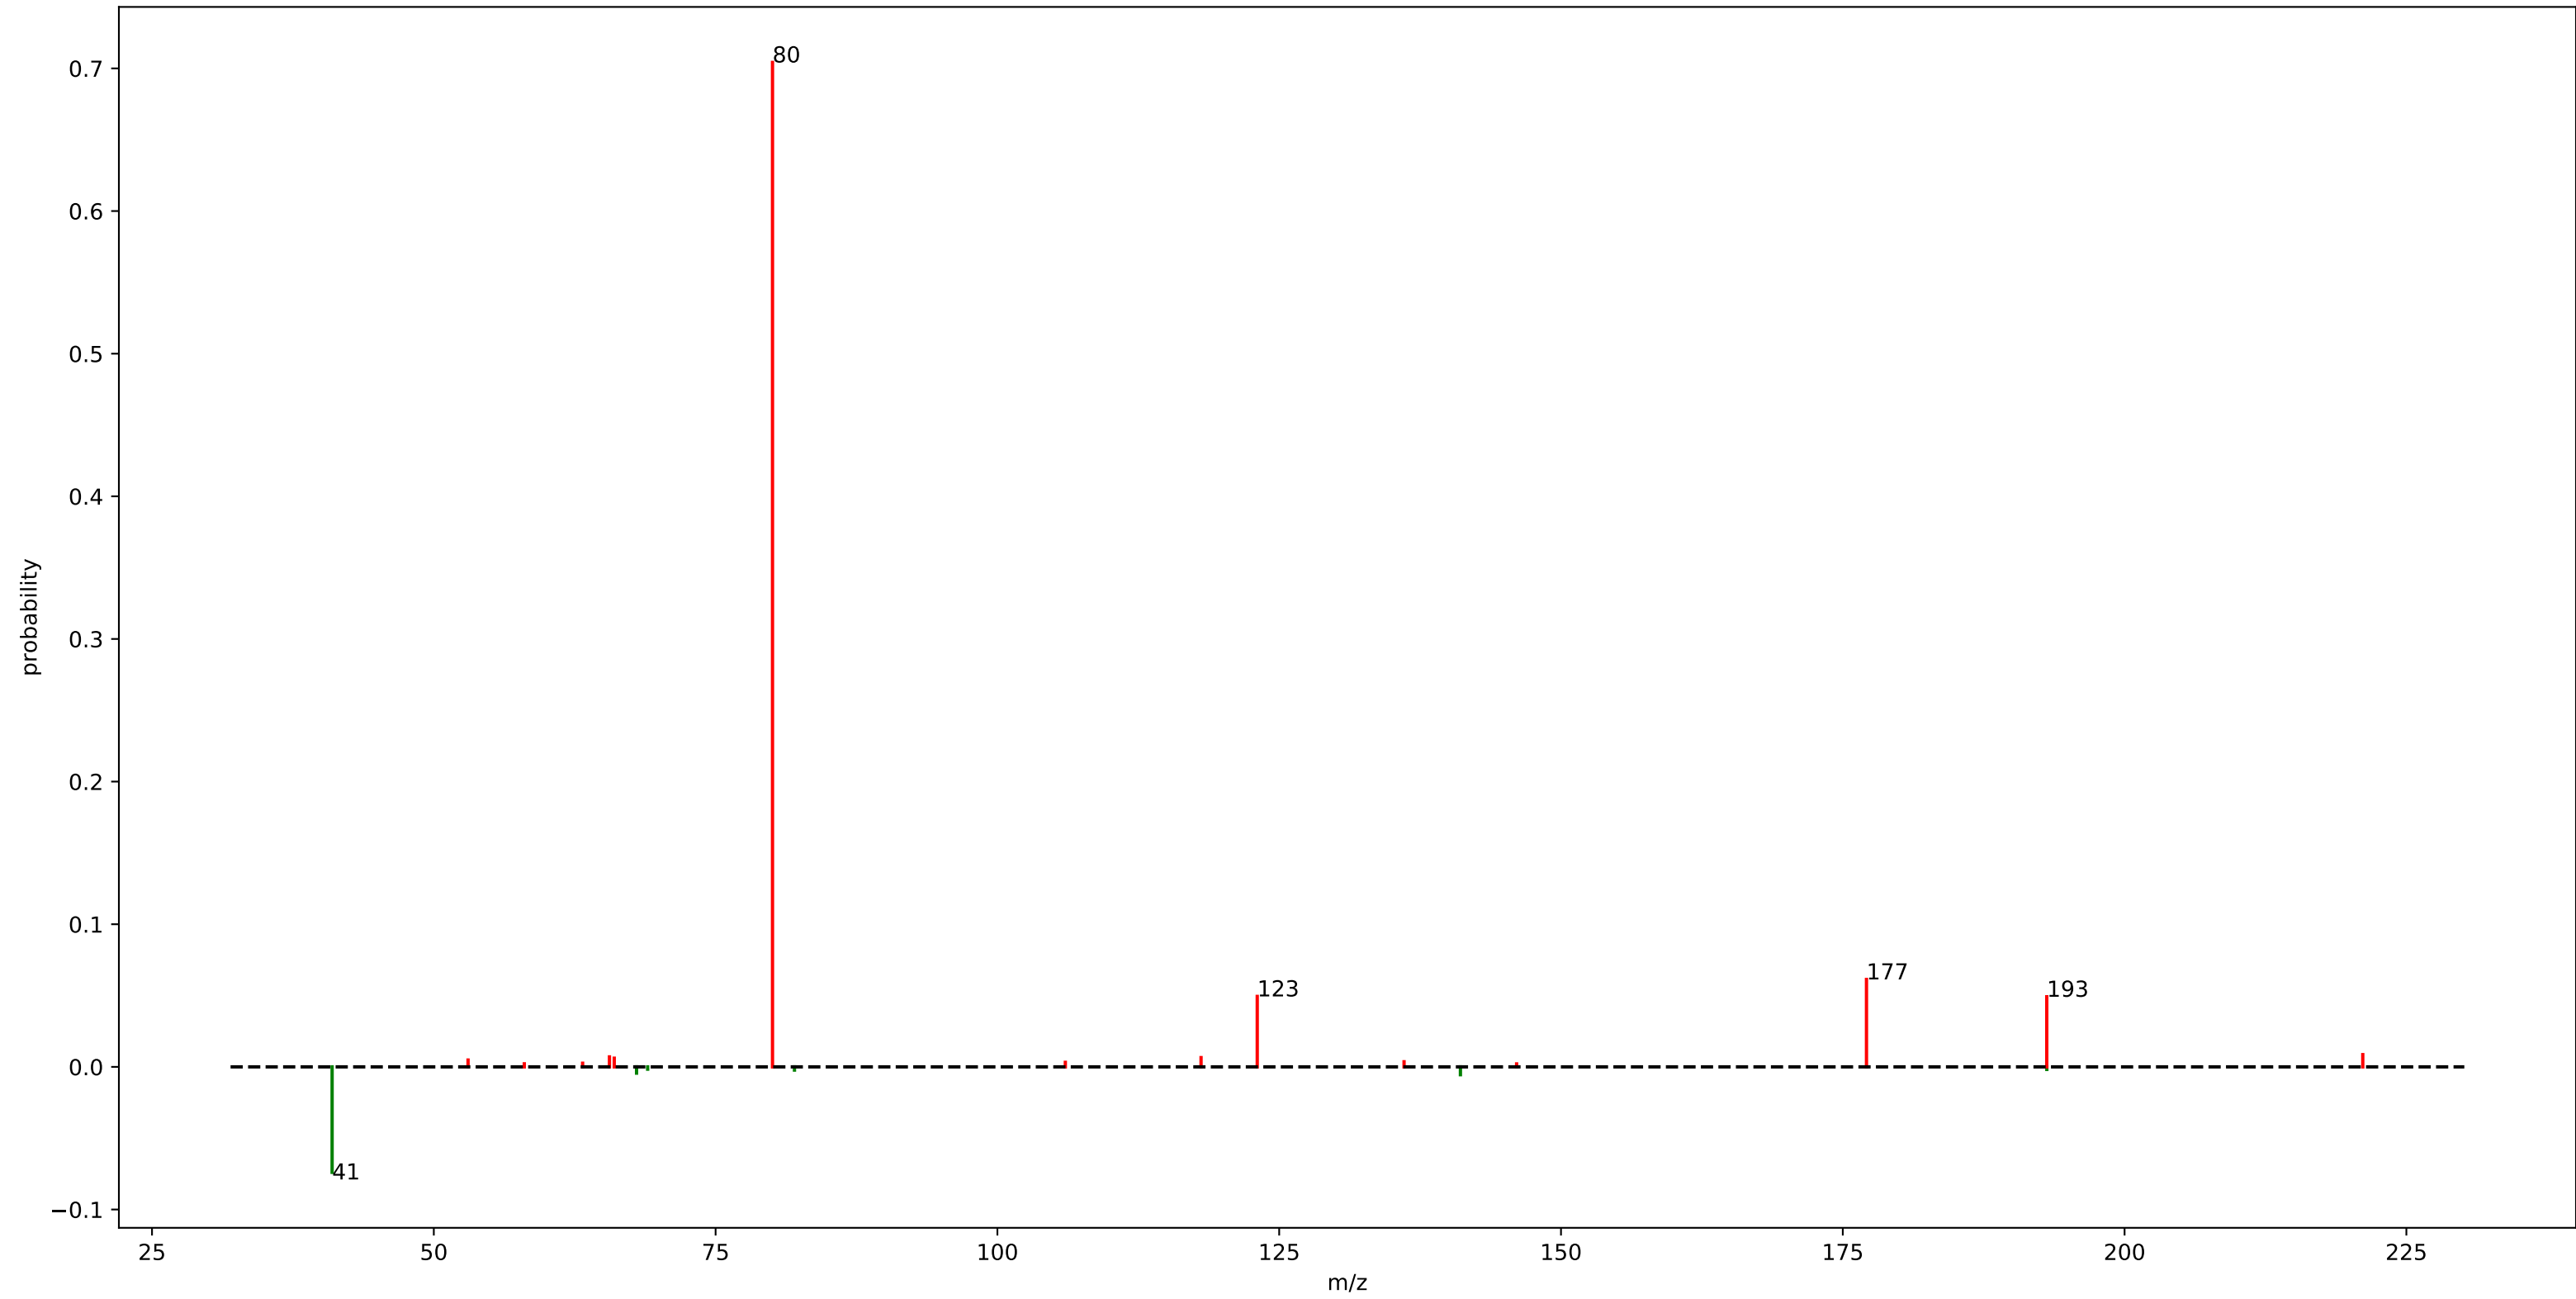

## urine\_mass2motif\_111.m2m

|                   |        |
|-------------------|--------|
| fragment_80.0475  | : 0.70 |
| loss_40.9775      | : 0.07 |
| fragment_177.1025 | : 0.06 |
| fragment_123.0525 | : 0.05 |
| fragment_193.0975 | : 0.05 |
| fragment_221.1325 | : 0.01 |
| fragment_65.5825  | : 0.01 |
| fragment_118.0675 | : 0.01 |
| fragment_66.0075  | : 0.01 |
| loss_141.0775     | : 0.01 |

motif\_519

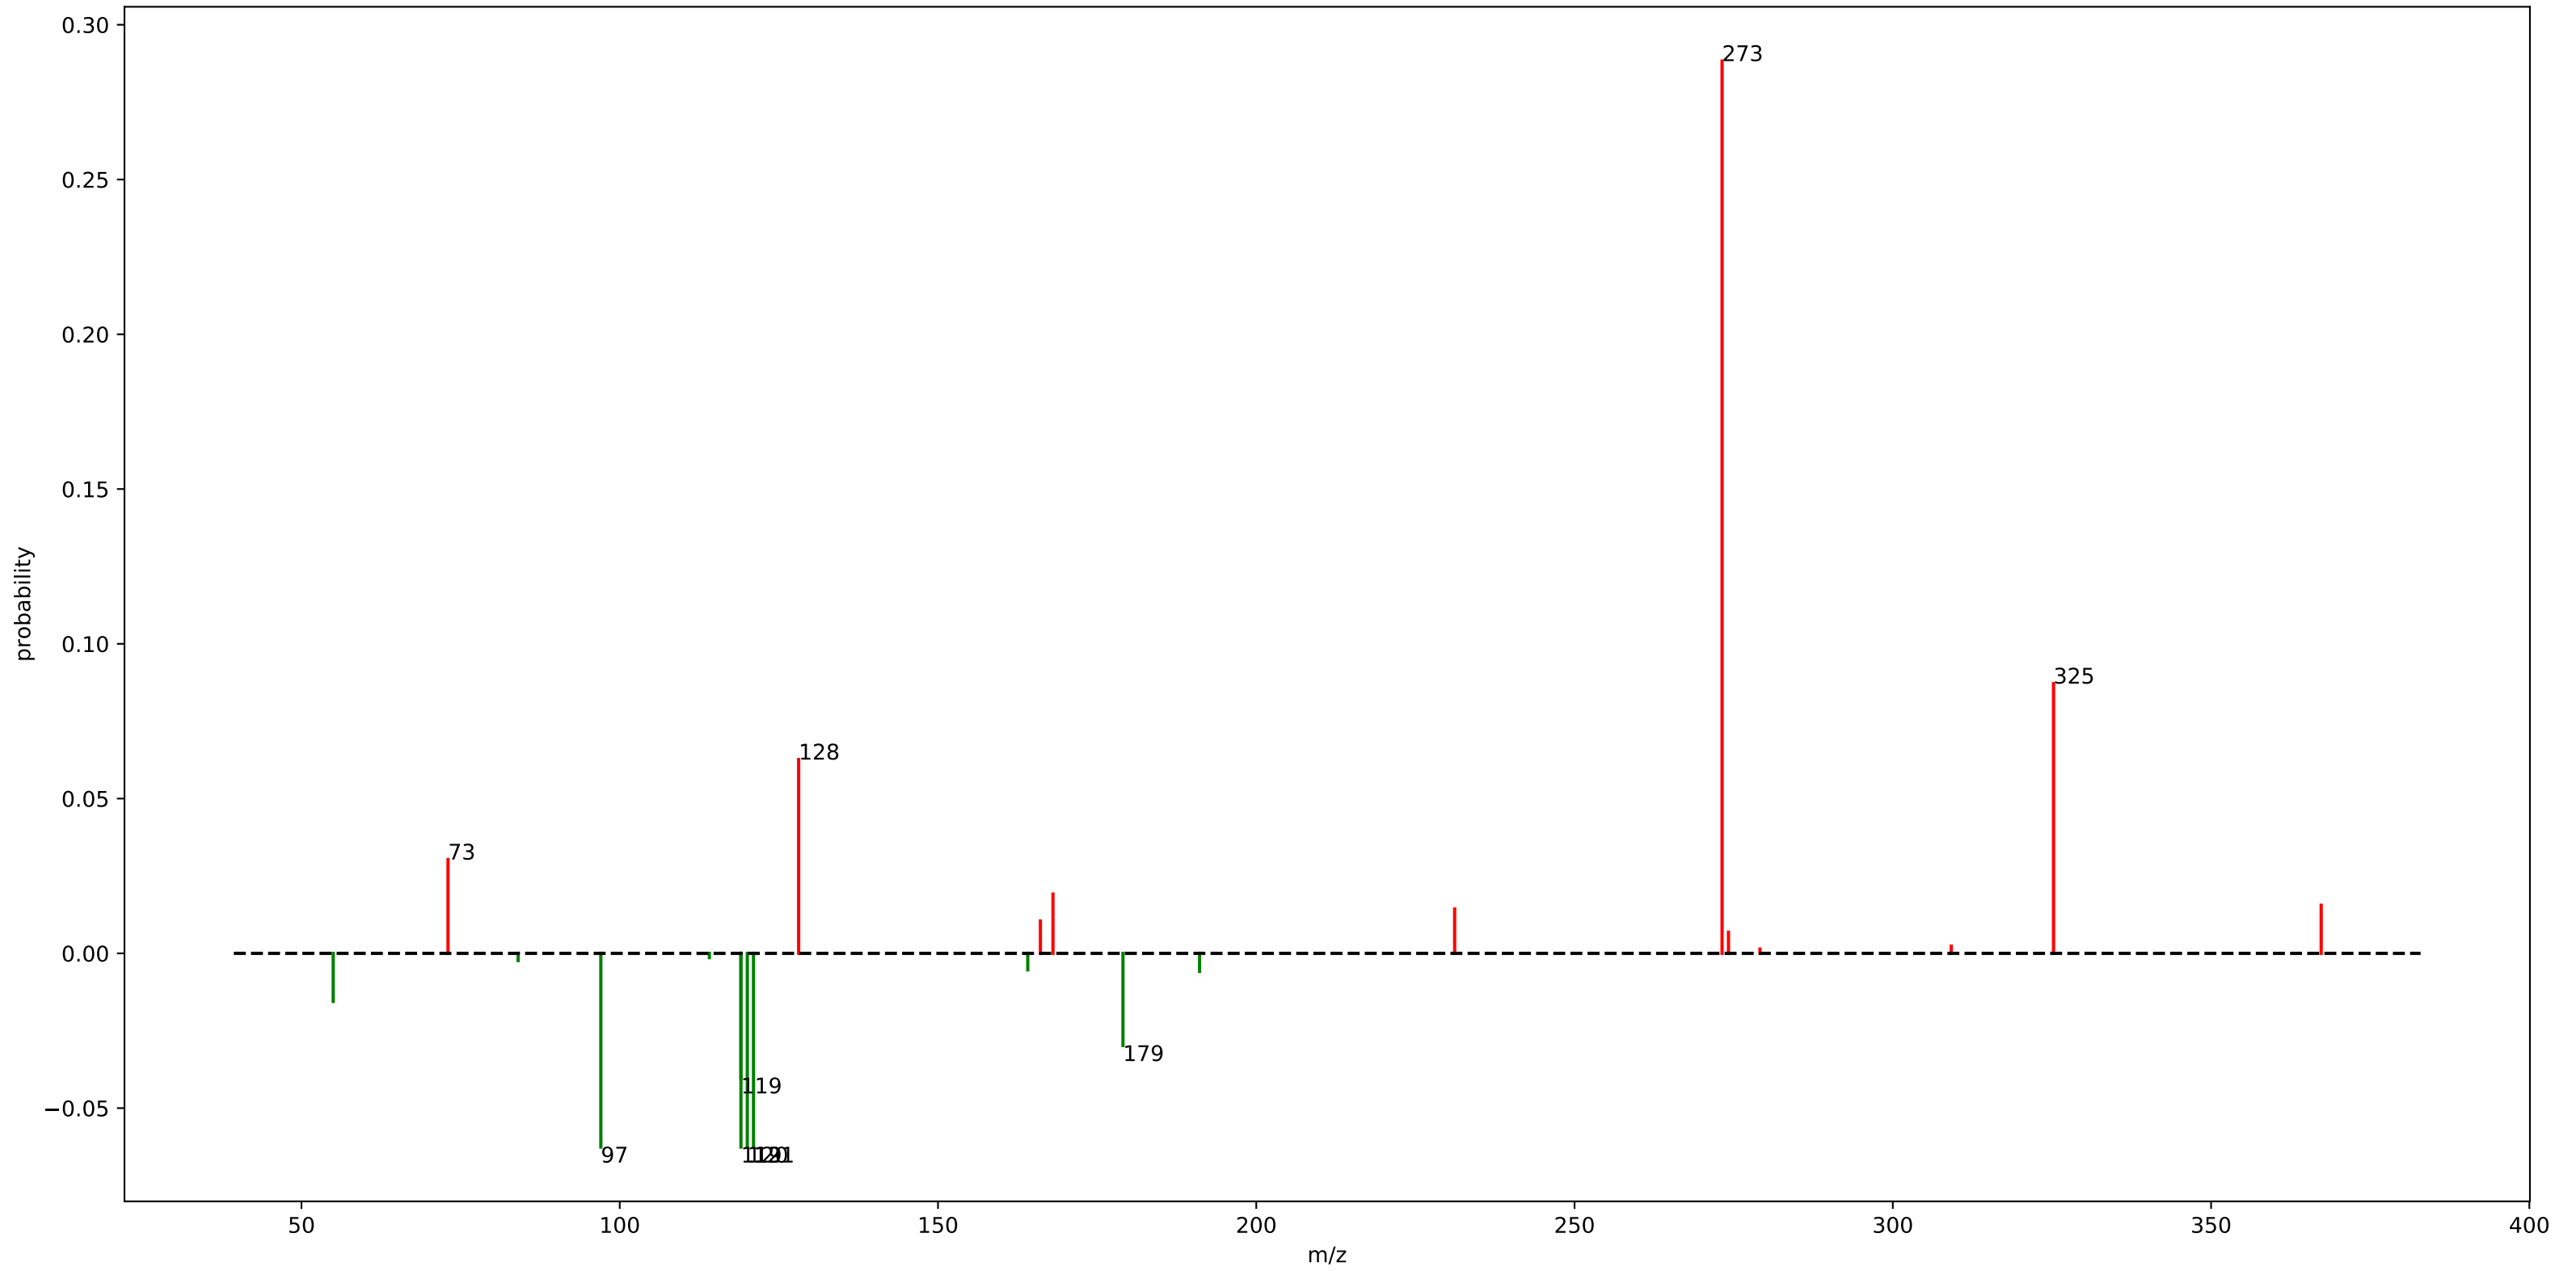

## motif\_519

|                   |        |
|-------------------|--------|
| fragment_273.1775 | : 0.29 |
| fragment_325.2525 | : 0.09 |
| fragment_128.1075 | : 0.06 |
| loss_121.0175     | : 0.06 |
| loss_119.0425     | : 0.06 |
| loss_97.0325      | : 0.06 |
| loss_120.0425     | : 0.06 |
| loss_119.0375     | : 0.04 |
| fragment_73.0275  | : 0.03 |
| loss_179.0575     | : 0.03 |
| fragment_168.0625 | : 0.02 |
| loss_54.9875      | : 0.02 |
| fragment_367.2975 | : 0.02 |
| fragment_231.1675 | : 0.01 |
| fragment_166.0875 | : 0.01 |
| fragment_274.1825 | : 0.01 |
| loss_191.0925     | : 0.01 |
| loss_164.1025     | : 0.01 |



rhamn\_motif\_87.m2m

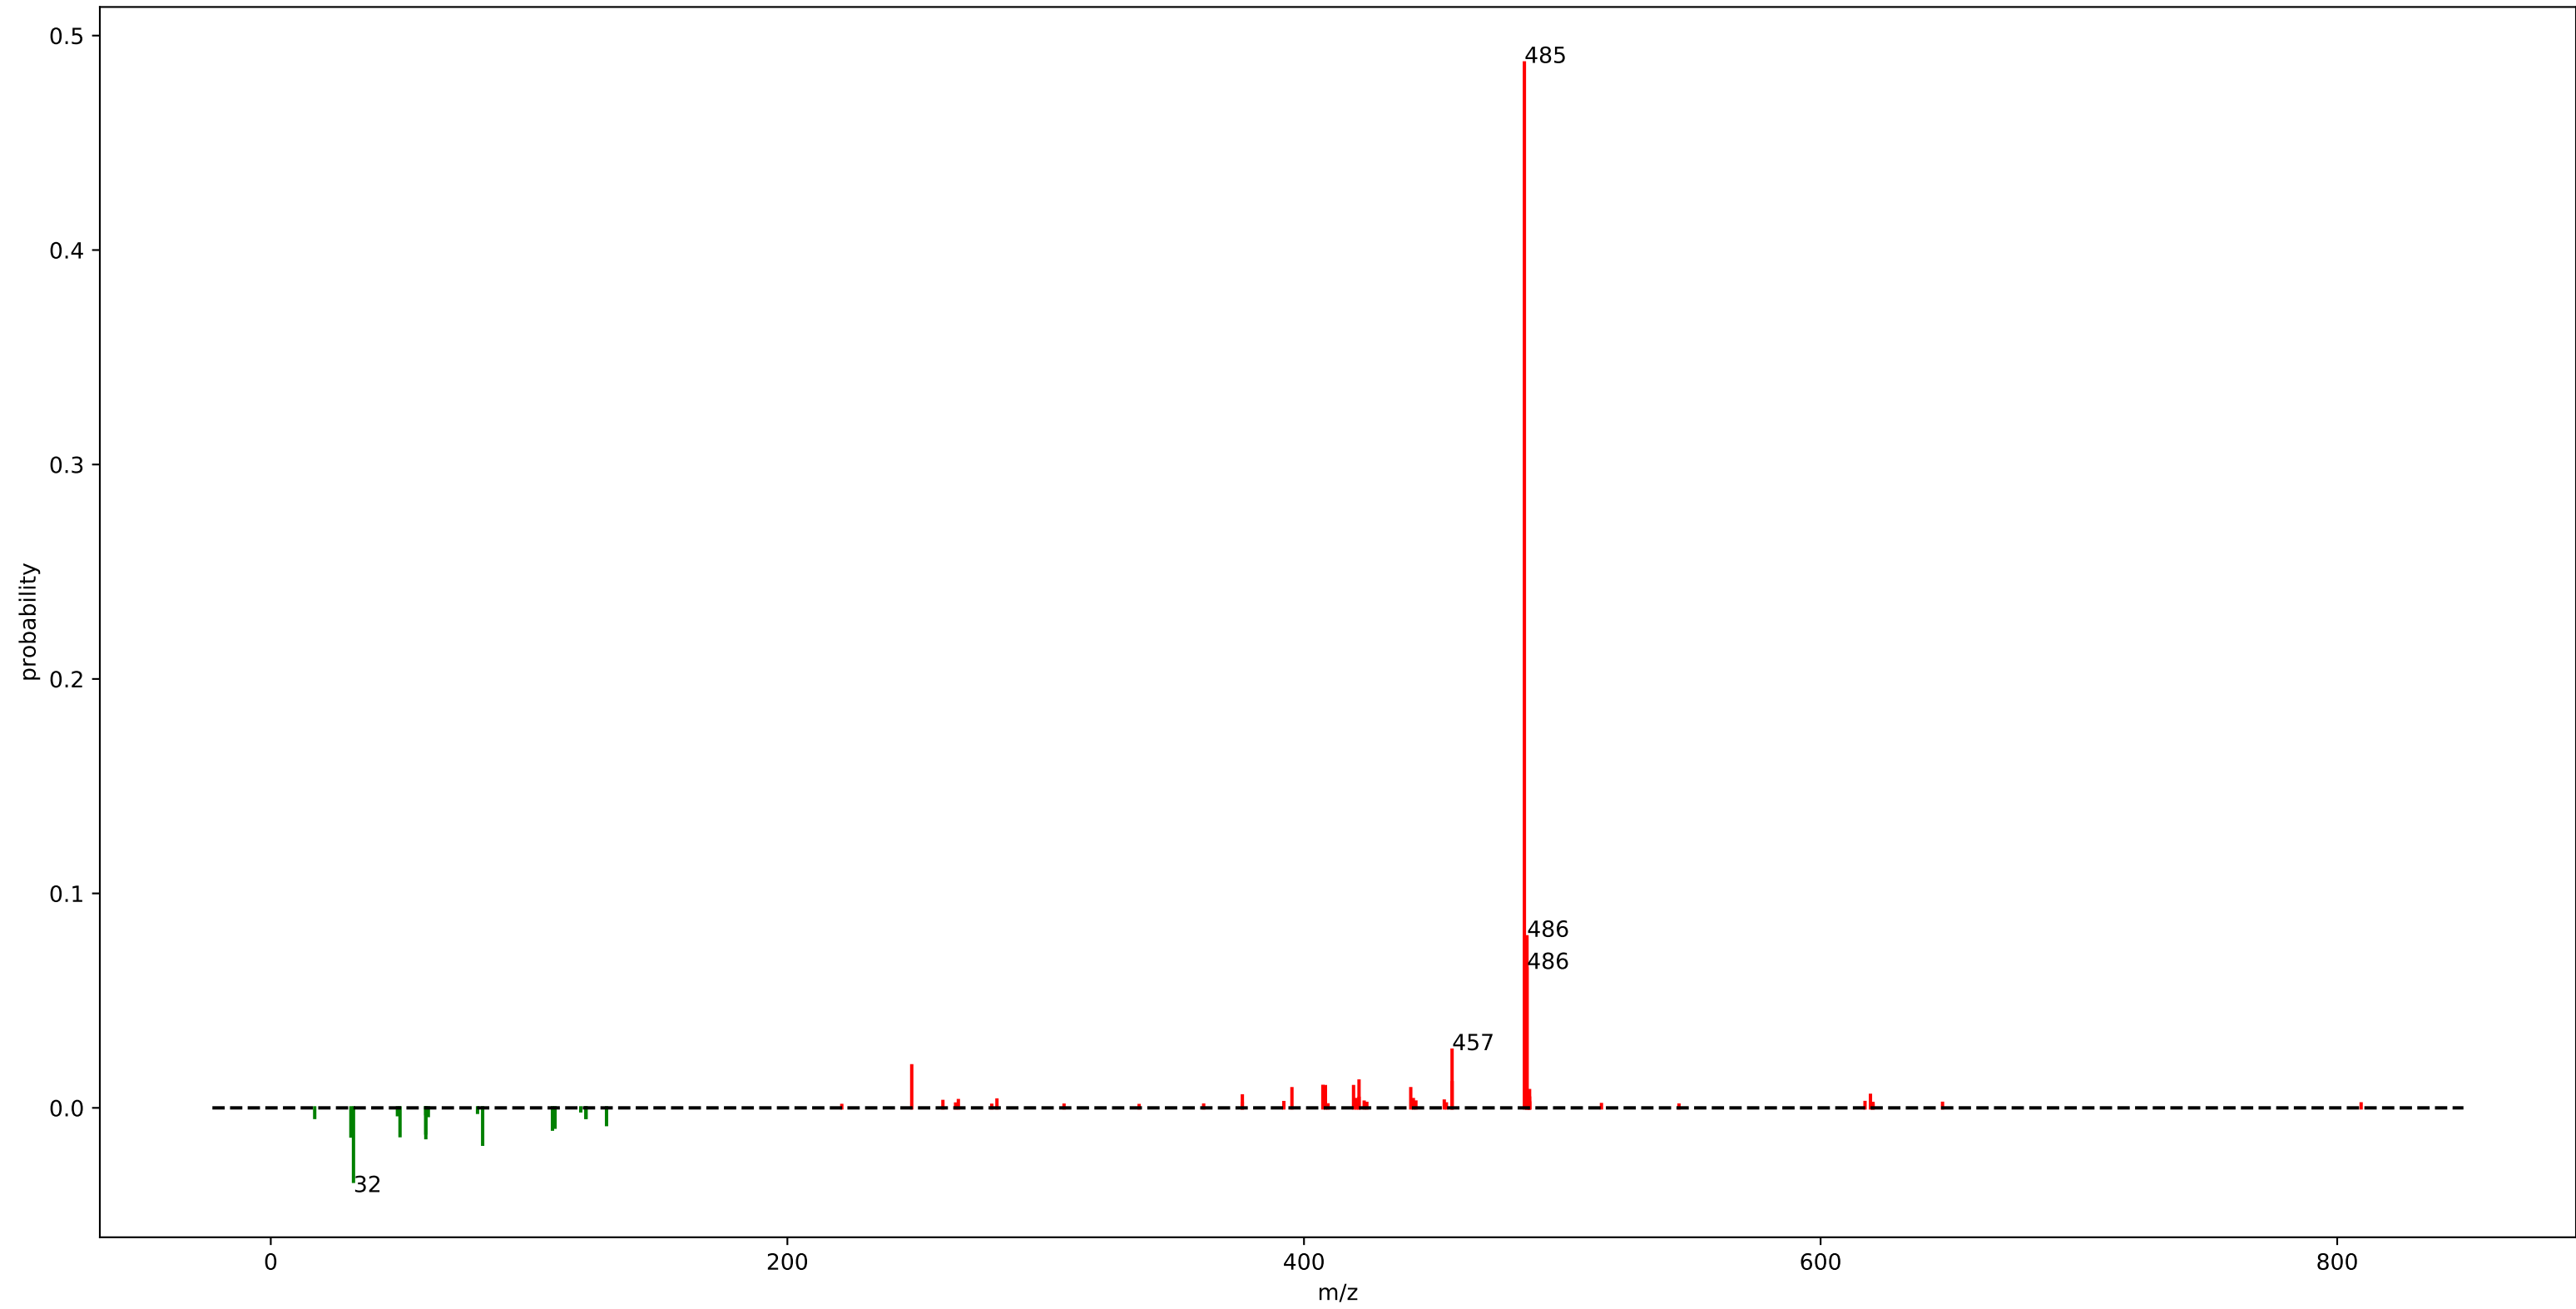

# rhamn\_motif\_87.m2m

|                   |        |                   |        |
|-------------------|--------|-------------------|--------|
| fragment_485.3275 | : 0.49 | fragment_487.3325 | : 0.01 |
| fragment_486.3325 | : 0.08 | loss_129.9875     | : 0.01 |
| fragment_486.3275 | : 0.06 | fragment_619.3025 | : 0.01 |
| loss_32.0225      | : 0.03 | fragment_376.1375 | : 0.01 |
| fragment_457.3275 | : 0.03 |                   |        |
| fragment_248.1425 | : 0.02 |                   |        |
| loss_82.0275      | : 0.02 |                   |        |
| loss_60.0275      | : 0.01 |                   |        |
| loss_31.0175      | : 0.01 |                   |        |
| loss_50.0375      | : 0.01 |                   |        |
| fragment_421.3075 | : 0.01 |                   |        |
| loss_60.0075      | : 0.01 |                   |        |
| fragment_457.3425 | : 0.01 |                   |        |
| fragment_407.3025 | : 0.01 |                   |        |
| fragment_419.1825 | : 0.01 |                   |        |
| loss_109.0525     | : 0.01 |                   |        |
| fragment_408.3025 | : 0.01 |                   |        |
| loss_110.0525     | : 0.01 |                   |        |
| fragment_441.3325 | : 0.01 |                   |        |
| fragment_395.3325 | : 0.01 |                   |        |

urine\_mass2motif\_47.m2m

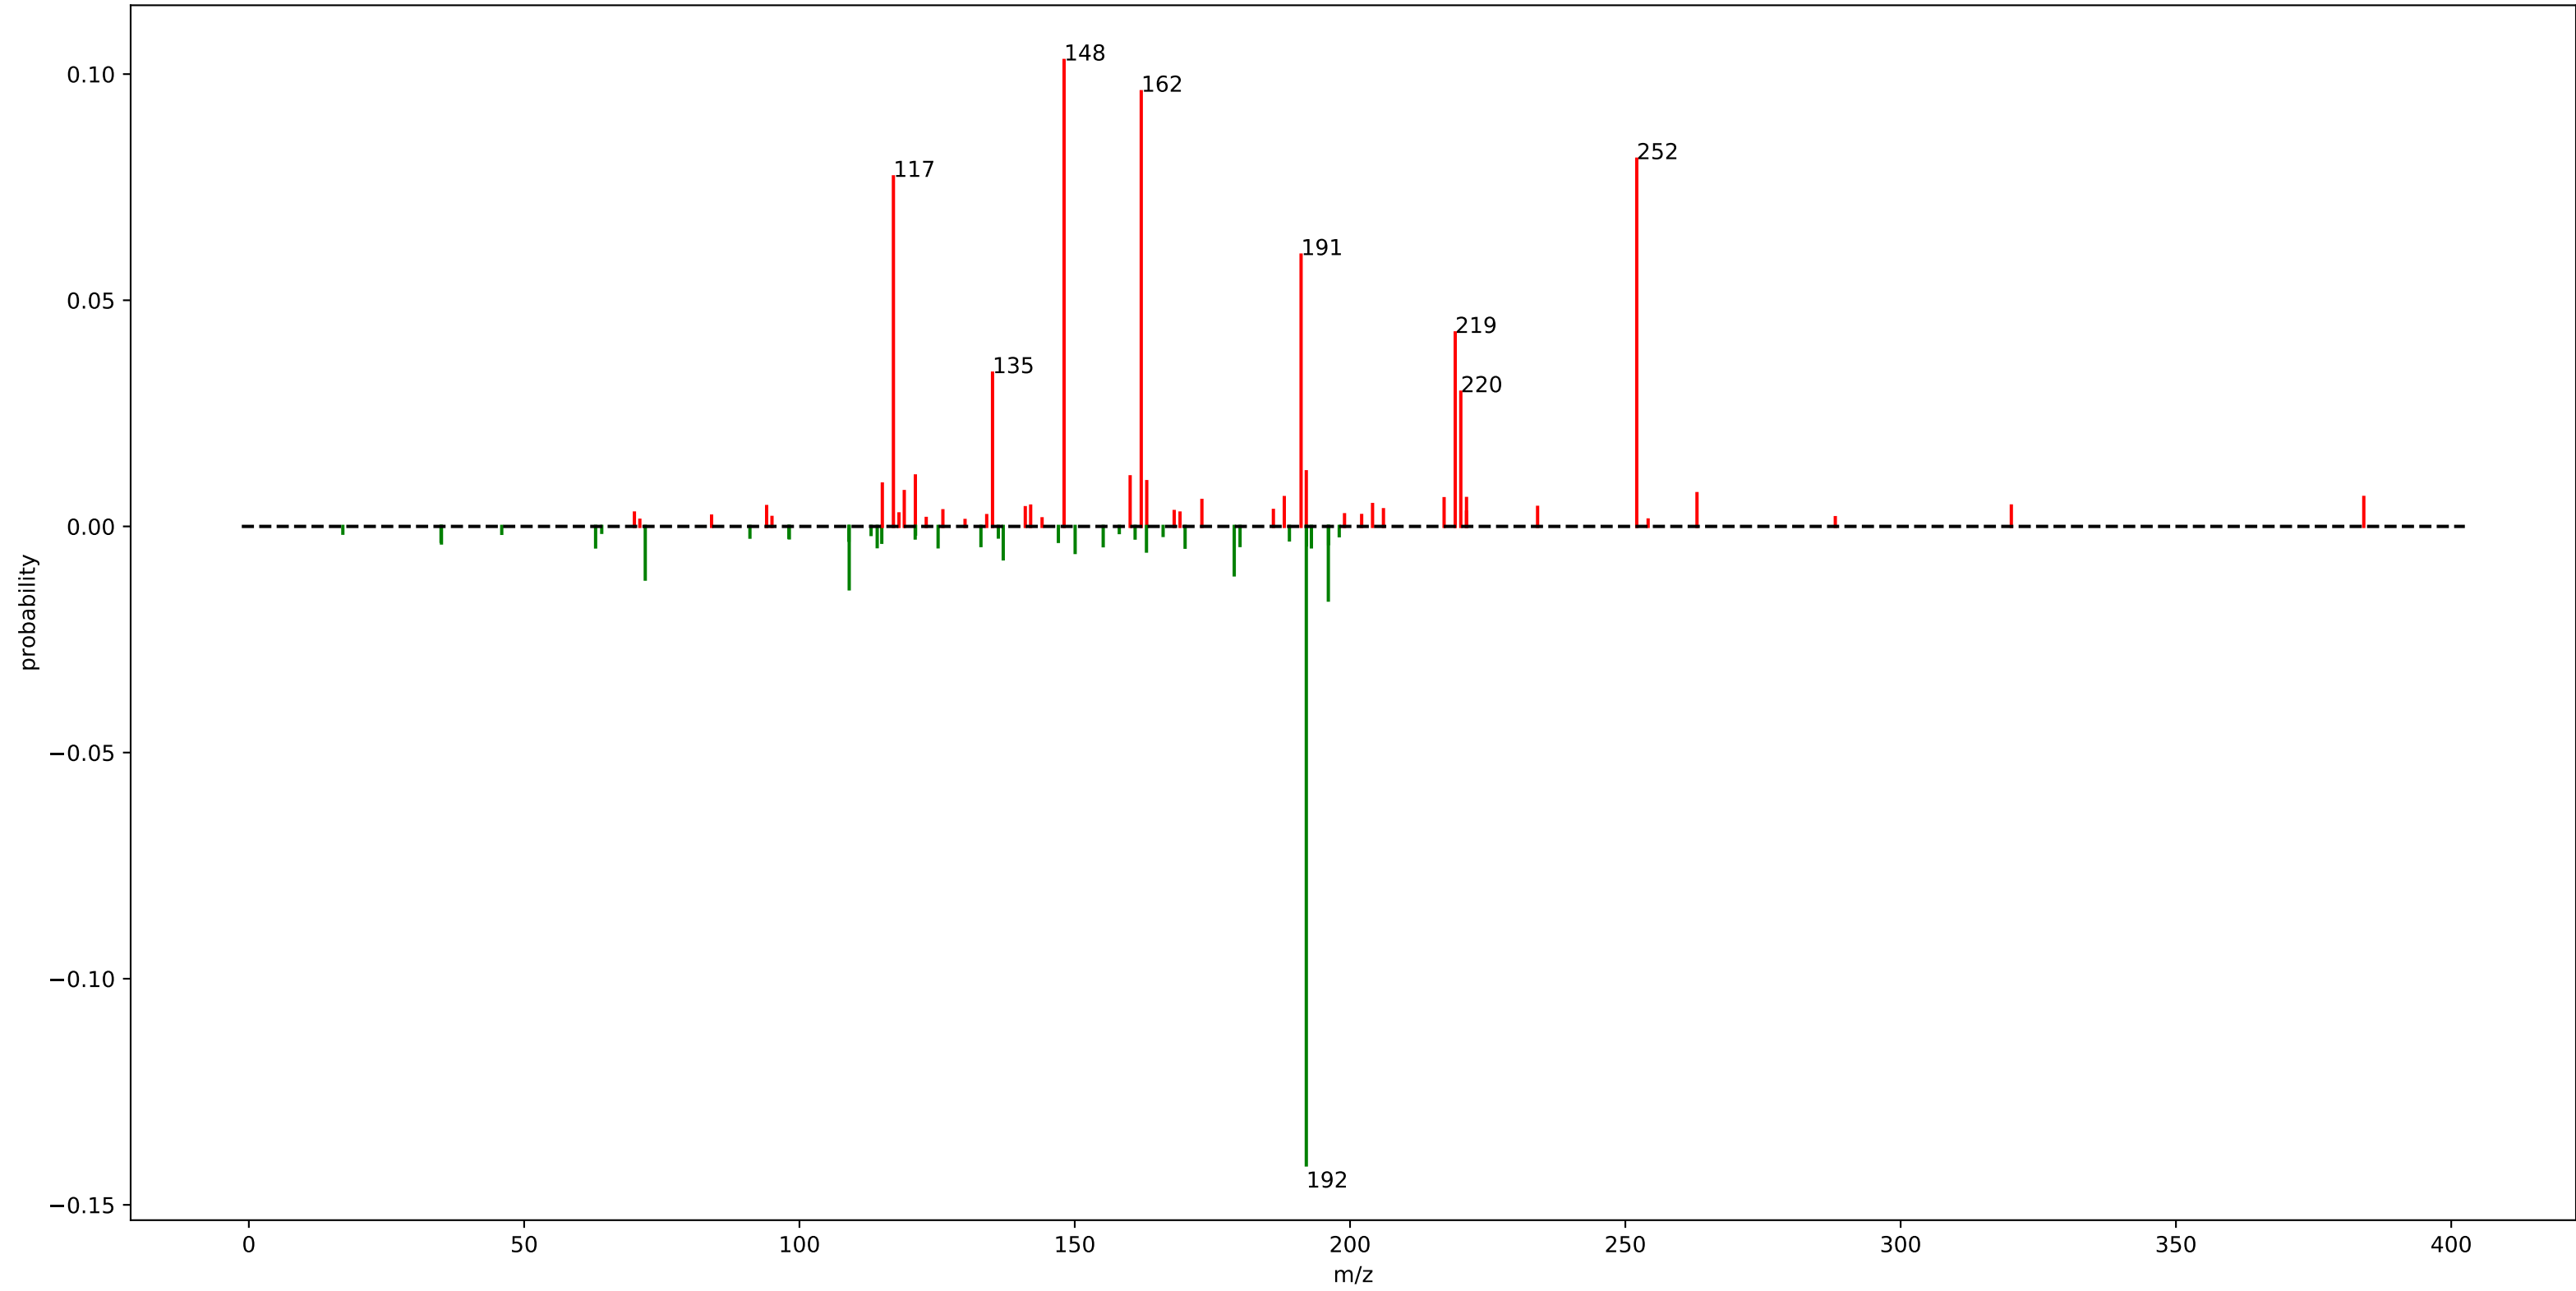

# urine\_mass2motif\_47.m2m

|                   |        |                   |        |
|-------------------|--------|-------------------|--------|
| loss_192.0575     | : 0.14 | loss_137.0125     | : 0.01 |
| fragment_148.0625 | : 0.10 | fragment_384.1175 | : 0.01 |
| fragment_162.0775 | : 0.10 | fragment_188.0575 | : 0.01 |
| fragment_252.0725 | : 0.08 | fragment_221.1525 | : 0.01 |
| fragment_117.0675 | : 0.08 | fragment_217.0825 | : 0.01 |
| fragment_191.1075 | : 0.06 | loss_150.0725     | : 0.01 |
| fragment_219.1025 | : 0.04 | fragment_173.0925 | : 0.01 |
| fragment_135.0675 | : 0.03 | loss_163.0275     | : 0.01 |
| fragment_220.1175 | : 0.03 |                   |        |
| loss_196.0575     | : 0.02 |                   |        |
| loss_109.0375     | : 0.01 |                   |        |
| fragment_192.0525 | : 0.01 |                   |        |
| loss_71.9975      | : 0.01 |                   |        |
| fragment_121.0525 | : 0.01 |                   |        |
| fragment_160.0625 | : 0.01 |                   |        |
| loss_178.9675     | : 0.01 |                   |        |
| fragment_163.0775 | : 0.01 |                   |        |
| fragment_115.0525 | : 0.01 |                   |        |
| fragment_119.0375 | : 0.01 |                   |        |
| fragment_263.0125 | : 0.01 |                   |        |

motif\_518

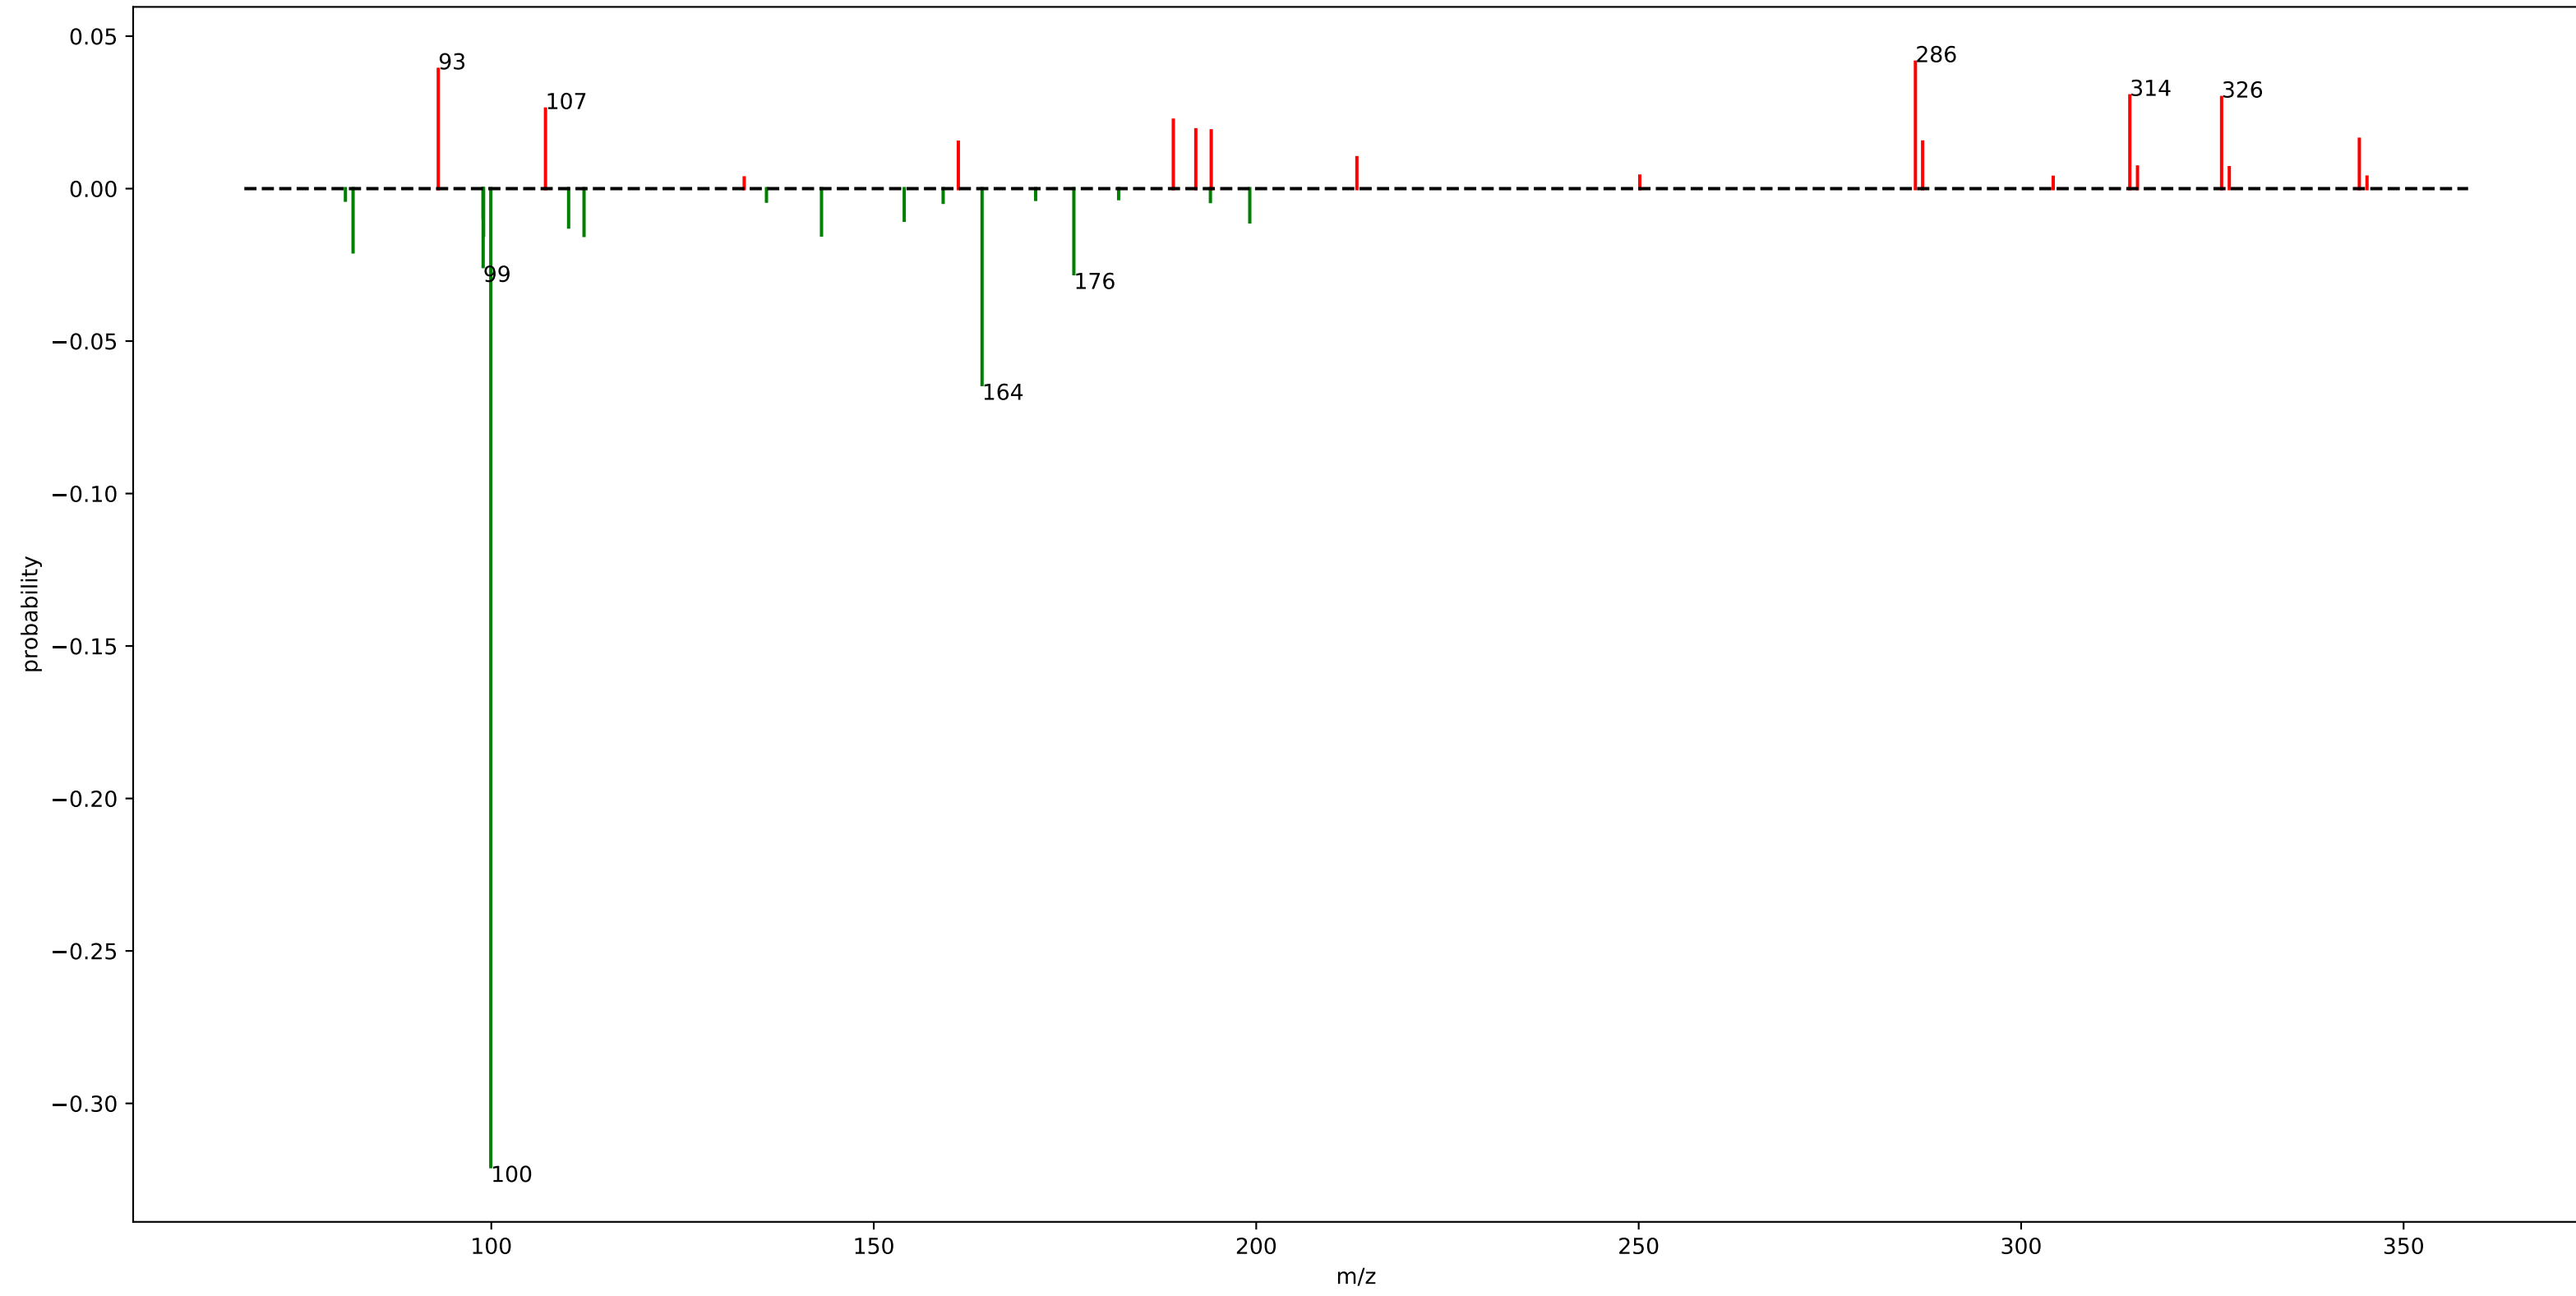

## motif\_518

|                   |        |                   |        |
|-------------------|--------|-------------------|--------|
| loss_99.9325      | : 0.32 | loss_199.1575     | : 0.01 |
| loss_164.1575     | : 0.06 | loss_153.9825     | : 0.01 |
| fragment_286.1775 | : 0.04 | fragment_213.1625 | : 0.01 |
| fragment_93.0675  | : 0.04 | loss_98.9275      | : 0.01 |
| fragment_314.2075 | : 0.03 | fragment_315.2125 | : 0.01 |
| fragment_326.2075 | : 0.03 | fragment_327.2125 | : 0.01 |
| loss_176.1575     | : 0.03 |                   |        |
| fragment_107.0825 | : 0.03 |                   |        |
| loss_98.9325      | : 0.03 |                   |        |
| fragment_189.1625 | : 0.02 |                   |        |
| loss_81.9275      | : 0.02 |                   |        |
| fragment_192.1025 | : 0.02 |                   |        |
| fragment_194.1175 | : 0.02 |                   |        |
| fragment_344.2125 | : 0.02 |                   |        |
| loss_112.1225     | : 0.02 |                   |        |
| loss_98.9875      | : 0.02 |                   |        |
| fragment_287.1225 | : 0.02 |                   |        |
| fragment_161.0575 | : 0.02 |                   |        |
| loss_143.1675     | : 0.02 |                   |        |
| loss_110.1075     | : 0.01 |                   |        |

rhamn\_motif\_164.m2m

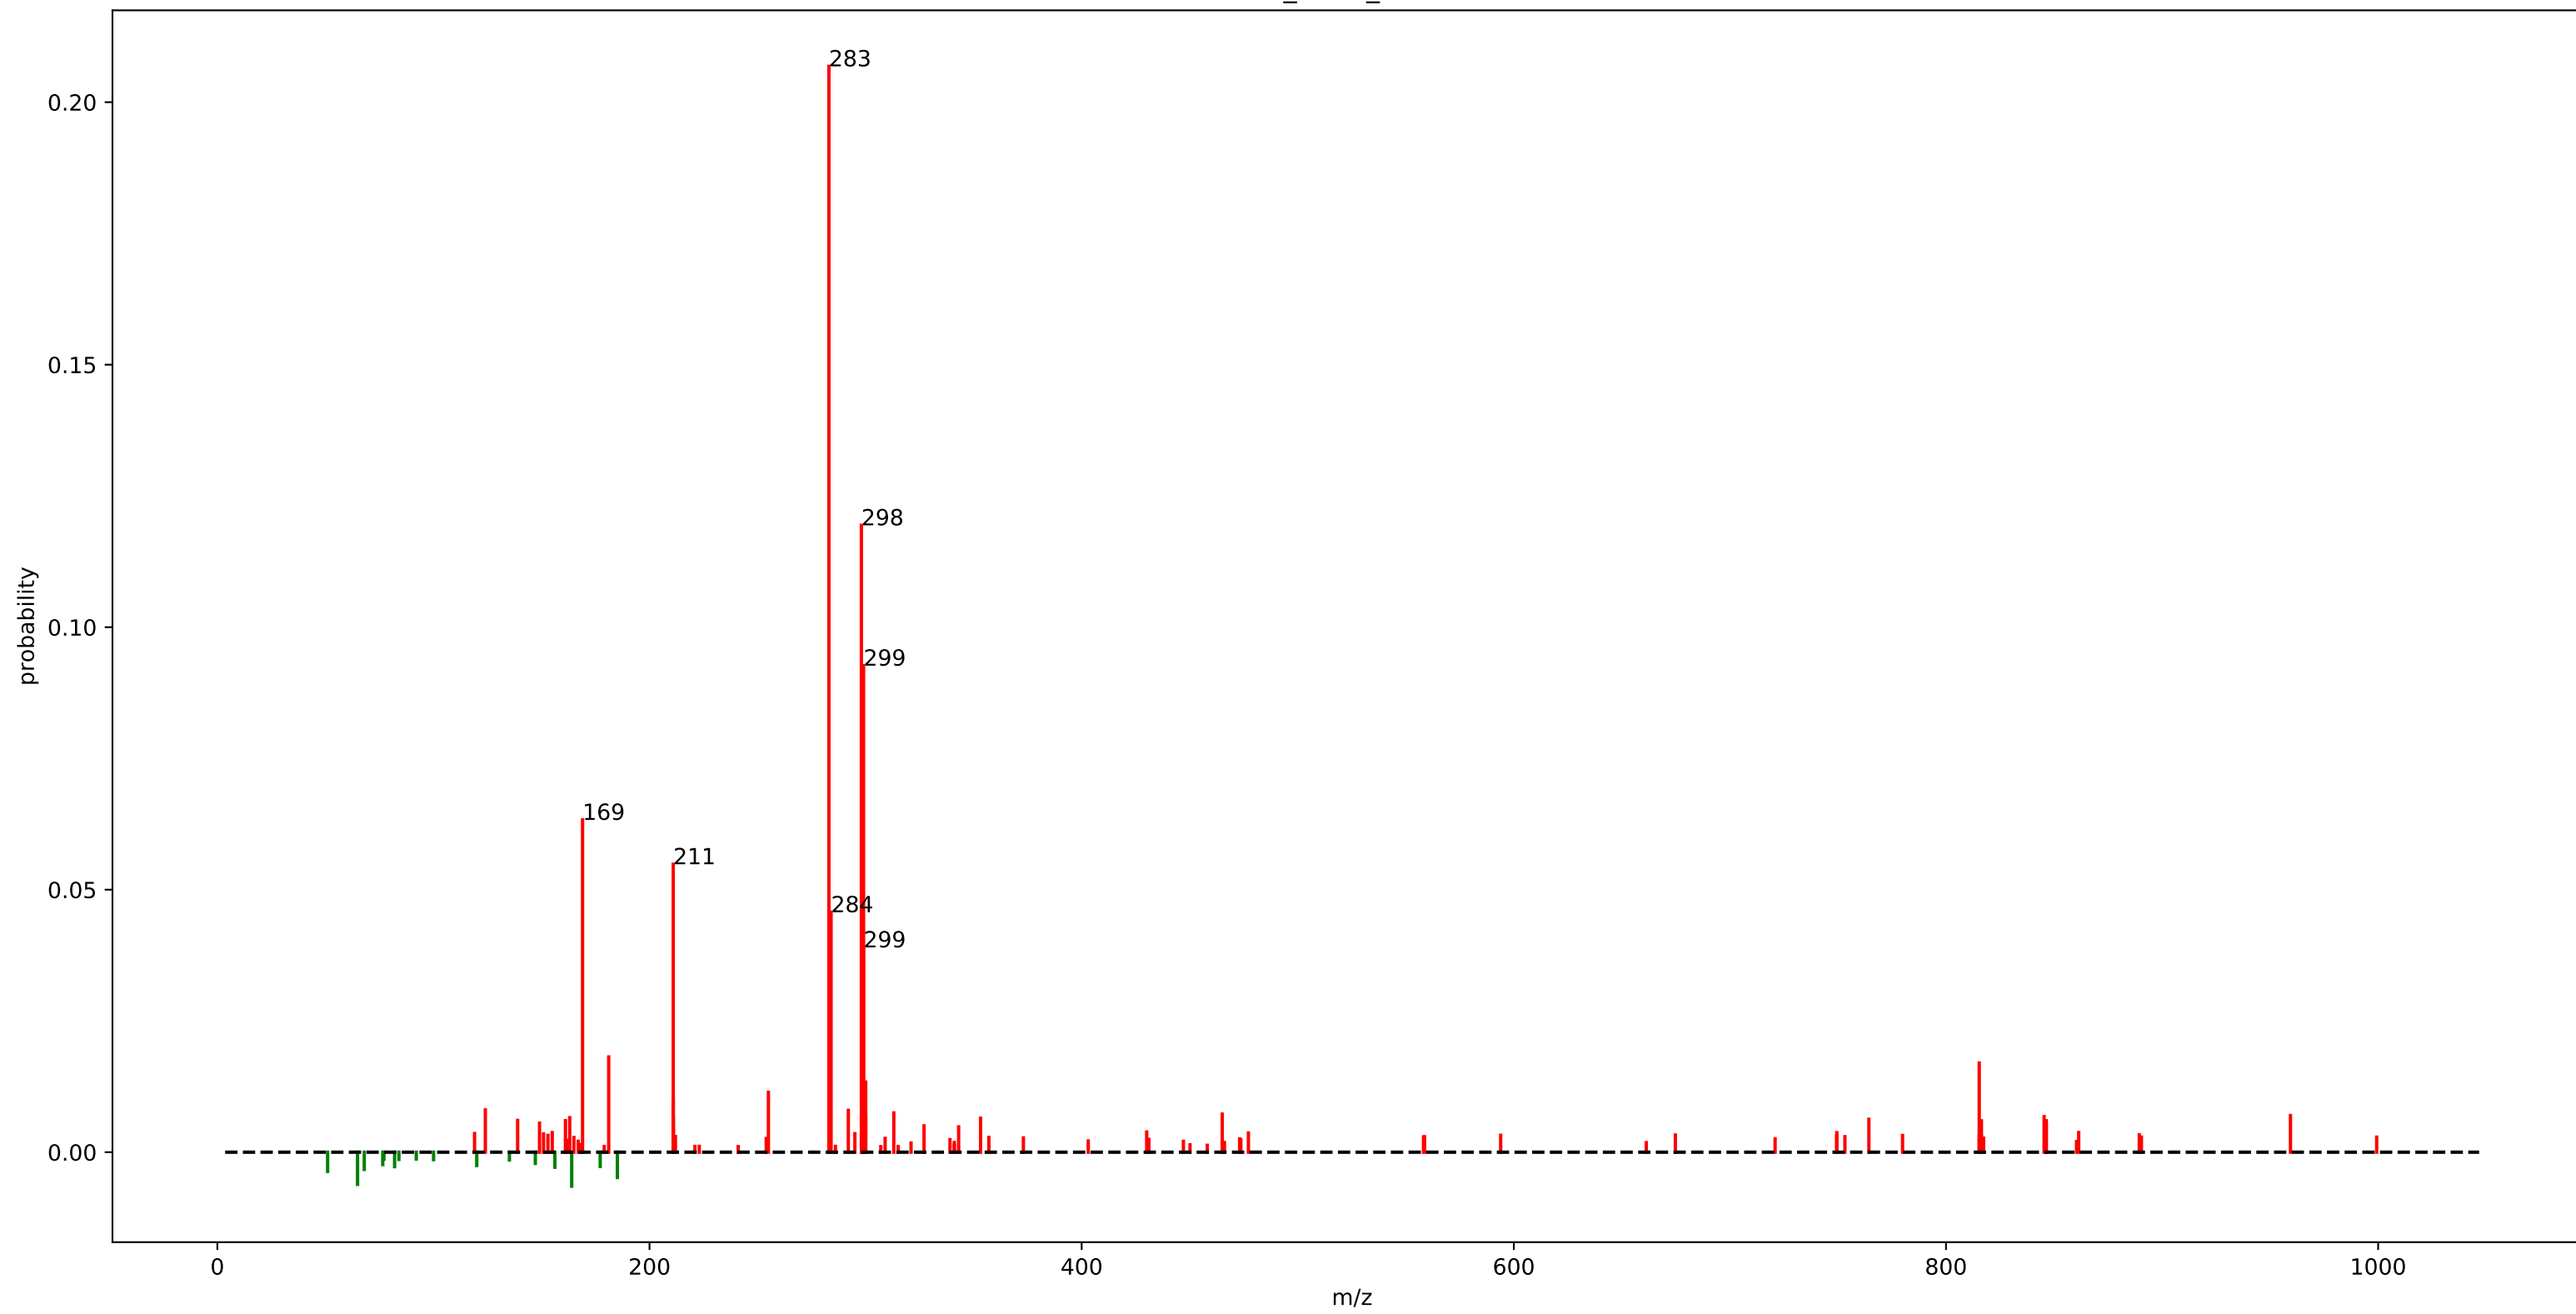

## rhamn\_motif\_164.m2m

|                   |        |                   |        |
|-------------------|--------|-------------------|--------|
| fragment_283.0225 | : 0.21 | fragment_163.0775 | : 0.01 |
| fragment_298.0475 | : 0.12 | fragment_353.2125 | : 0.01 |
| fragment_299.0575 | : 0.09 | loss_163.9925     | : 0.01 |
| fragment_169.0175 | : 0.06 | fragment_764.3175 | : 0.01 |
| fragment_210.9875 | : 0.05 | loss_64.8825      | : 0.01 |
| fragment_284.0275 | : 0.05 | fragment_138.9675 | : 0.01 |
| fragment_299.0525 | : 0.04 | fragment_161.0975 | : 0.01 |
| fragment_181.1175 | : 0.02 | fragment_846.3975 | : 0.01 |
| fragment_815.3775 | : 0.02 | fragment_816.4075 | : 0.01 |
| fragment_300.0575 | : 0.01 | fragment_149.1025 | : 0.01 |
| fragment_255.0275 | : 0.01 | fragment_846.4275 | : 0.01 |
| fragment_210.9975 | : 0.01 | fragment_327.0525 | : 0.01 |
| fragment_124.0225 | : 0.01 |                   |        |
| fragment_292.0175 | : 0.01 |                   |        |
| fragment_313.0575 | : 0.01 |                   |        |
| fragment_465.0725 | : 0.01 |                   |        |
| fragment_959.4225 | : 0.01 |                   |        |
| fragment_300.0625 | : 0.01 |                   |        |
| fragment_845.4075 | : 0.01 |                   |        |
| fragment_211.0225 | : 0.01 |                   |        |



gnps\_motif\_23.m2m

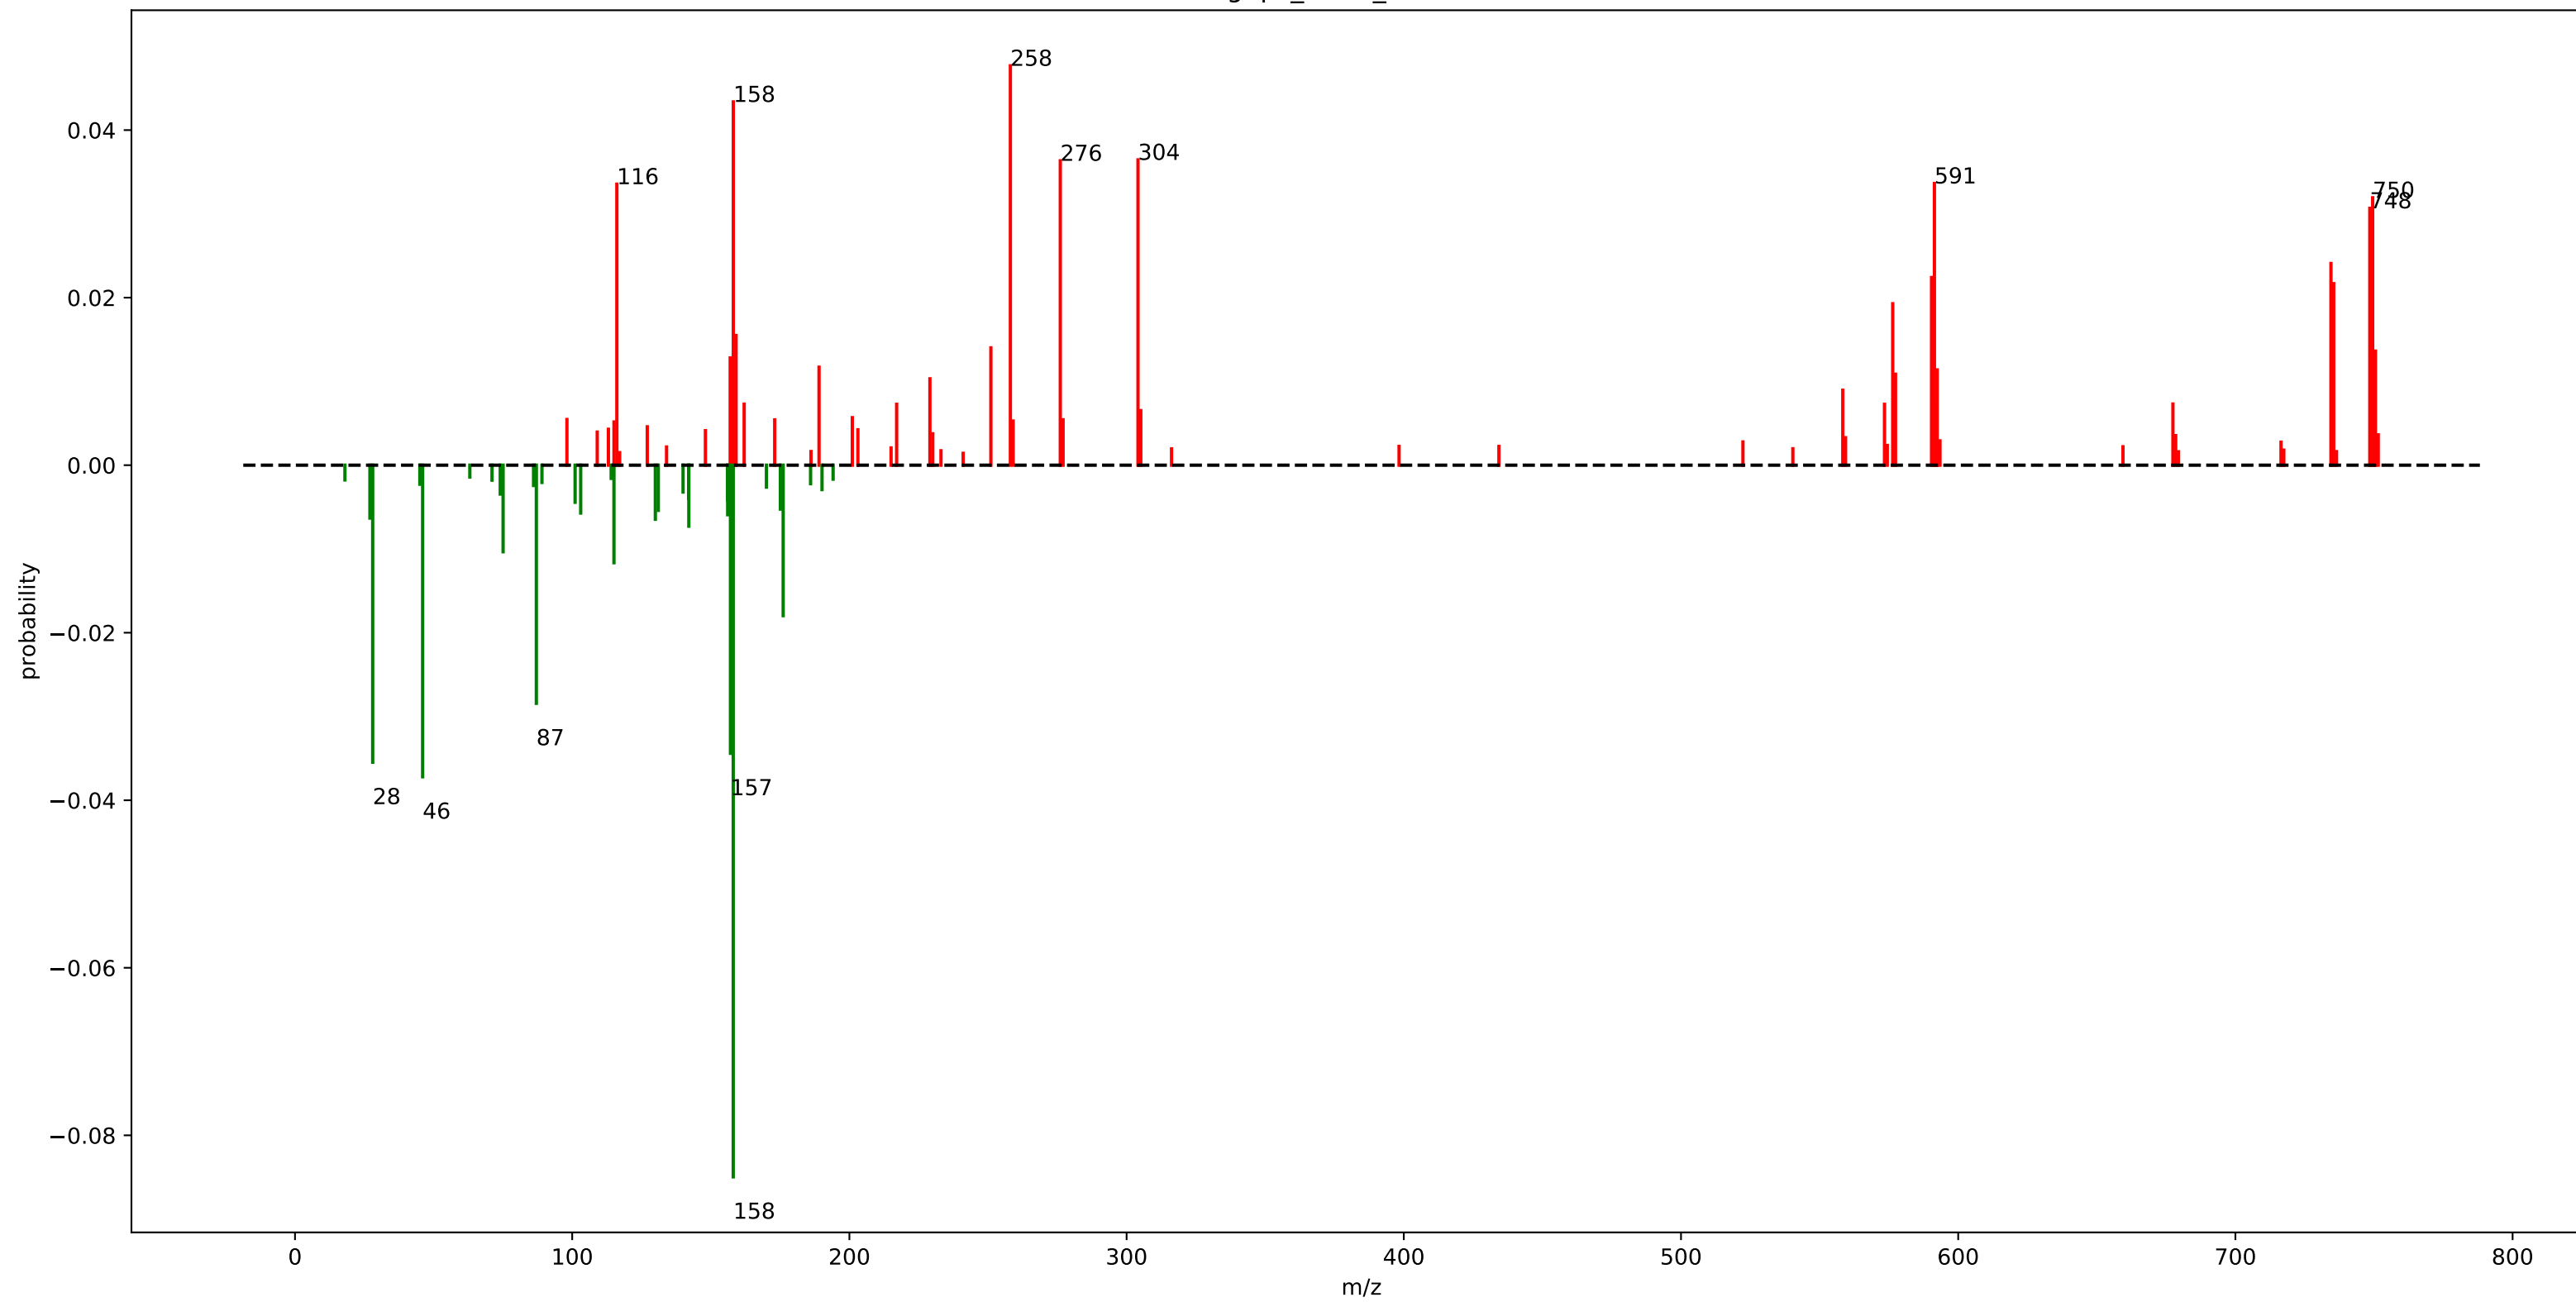

# gnps\_motif\_23.m2m

|                   |        |                   |        |                   |        |
|-------------------|--------|-------------------|--------|-------------------|--------|
| loss_158.0925     | : 0.08 | fragment_750.5225 | : 0.01 | loss_103.0625     | : 0.01 |
| fragment_258.0675 | : 0.05 | fragment_156.9975 | : 0.01 | fragment_201.0475 | : 0.01 |
| fragment_158.1175 | : 0.04 | fragment_749.4875 | : 0.01 | fragment_98.0975  | : 0.01 |
| loss_46.0425      | : 0.04 | fragment_189.0475 | : 0.01 | fragment_277.0825 | : 0.01 |
| fragment_304.1075 | : 0.04 | loss_115.0625     | : 0.01 | fragment_173.0525 | : 0.01 |
| fragment_276.0775 | : 0.04 | fragment_592.4225 | : 0.01 | loss_131.0575     | : 0.01 |
| loss_28.0275      | : 0.04 | fragment_577.3775 | : 0.01 | fragment_259.0725 | : 0.01 |
| loss_157.0925     | : 0.03 | loss_75.0675      | : 0.01 | loss_175.0975     | : 0.01 |
| fragment_591.4175 | : 0.03 | fragment_229.0425 | : 0.01 | fragment_115.0775 | : 0.01 |
| fragment_116.1075 | : 0.03 | fragment_558.3625 | : 0.01 |                   |        |
| fragment_749.5175 | : 0.03 | fragment_591.3925 | : 0.01 |                   |        |
| fragment_748.4875 | : 0.03 | fragment_677.4575 | : 0.01 |                   |        |
| loss_87.0675      | : 0.03 | fragment_162.0375 | : 0.01 |                   |        |
| fragment_734.4675 | : 0.02 | loss_142.0725     | : 0.01 |                   |        |
| fragment_590.3875 | : 0.02 | fragment_217.0425 | : 0.01 |                   |        |
| fragment_735.4725 | : 0.02 | fragment_573.4125 | : 0.01 |                   |        |
| fragment_576.3775 | : 0.02 | fragment_305.1125 | : 0.01 |                   |        |
| loss_176.1075     | : 0.02 | loss_129.9925     | : 0.01 |                   |        |
| fragment_159.1175 | : 0.02 | loss_27.0275      | : 0.01 |                   |        |
| fragment_251.0375 | : 0.01 | loss_156.0875     | : 0.01 |                   |        |

motif\_456

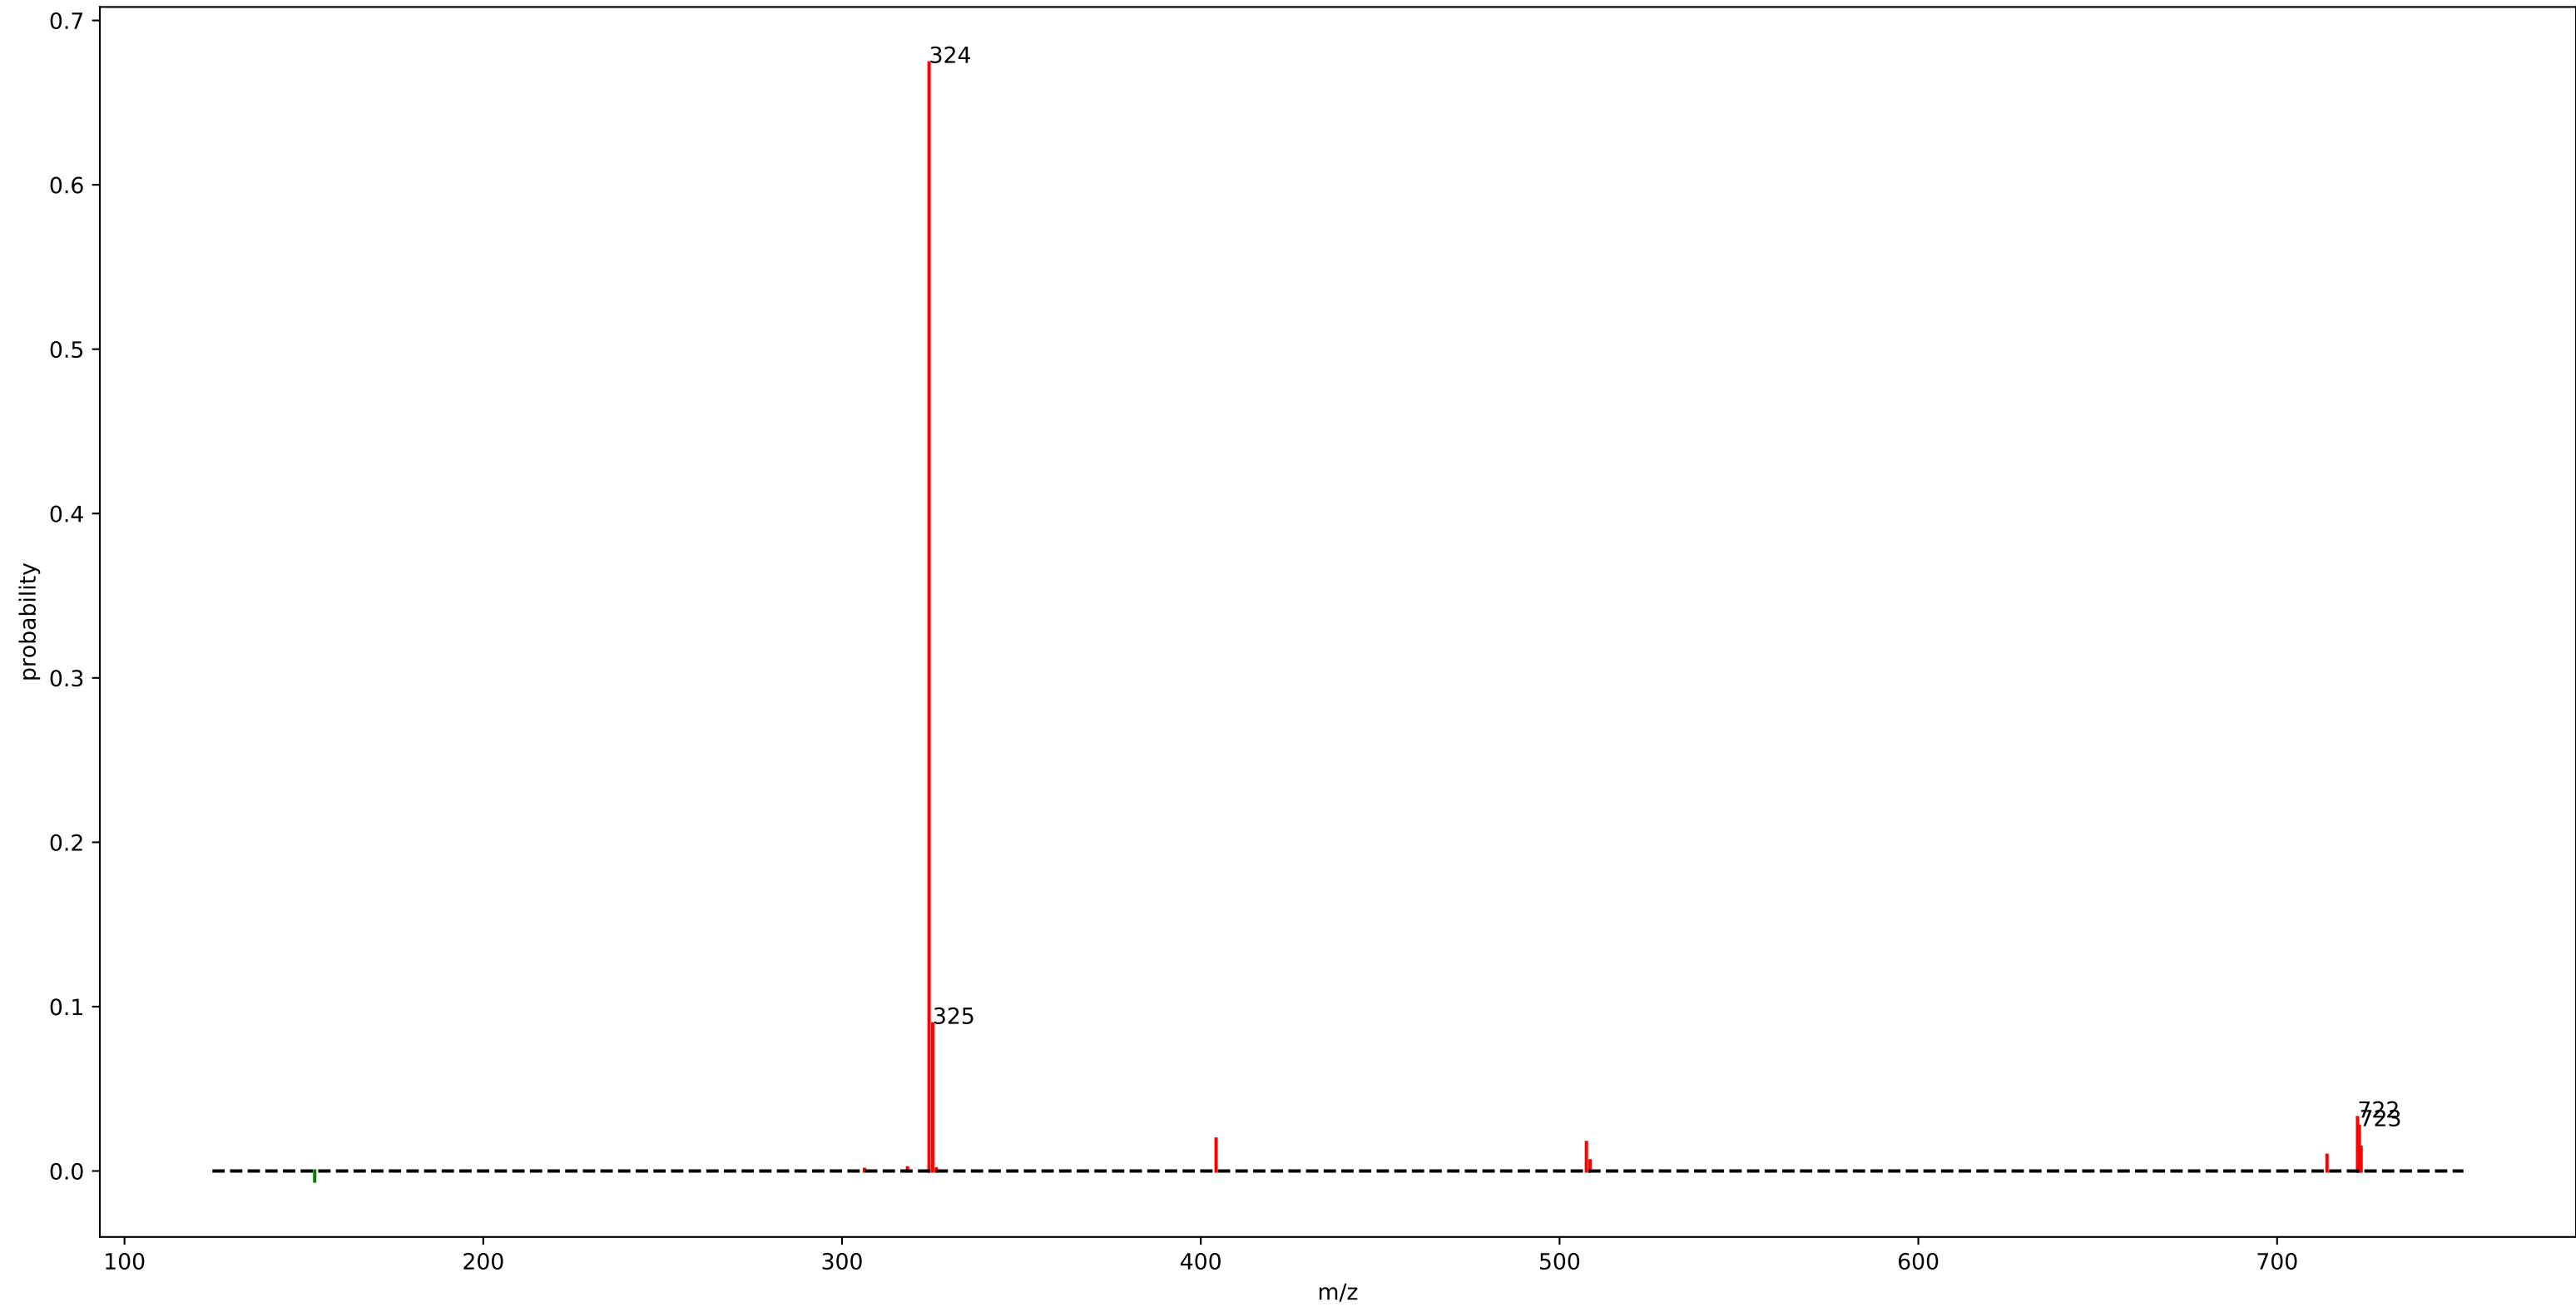

## motif\_456

|                   |        |
|-------------------|--------|
| fragment_324.2525 | : 0.67 |
| fragment_325.2575 | : 0.09 |
| fragment_722.4175 | : 0.03 |
| fragment_722.9175 | : 0.03 |
| fragment_404.2575 | : 0.02 |
| fragment_507.4775 | : 0.02 |
| fragment_723.4225 | : 0.01 |
| fragment_713.9125 | : 0.01 |
| fragment_508.4825 | : 0.01 |
| loss_153.0175     | : 0.01 |

euphorbia\_motif\_260.m2m

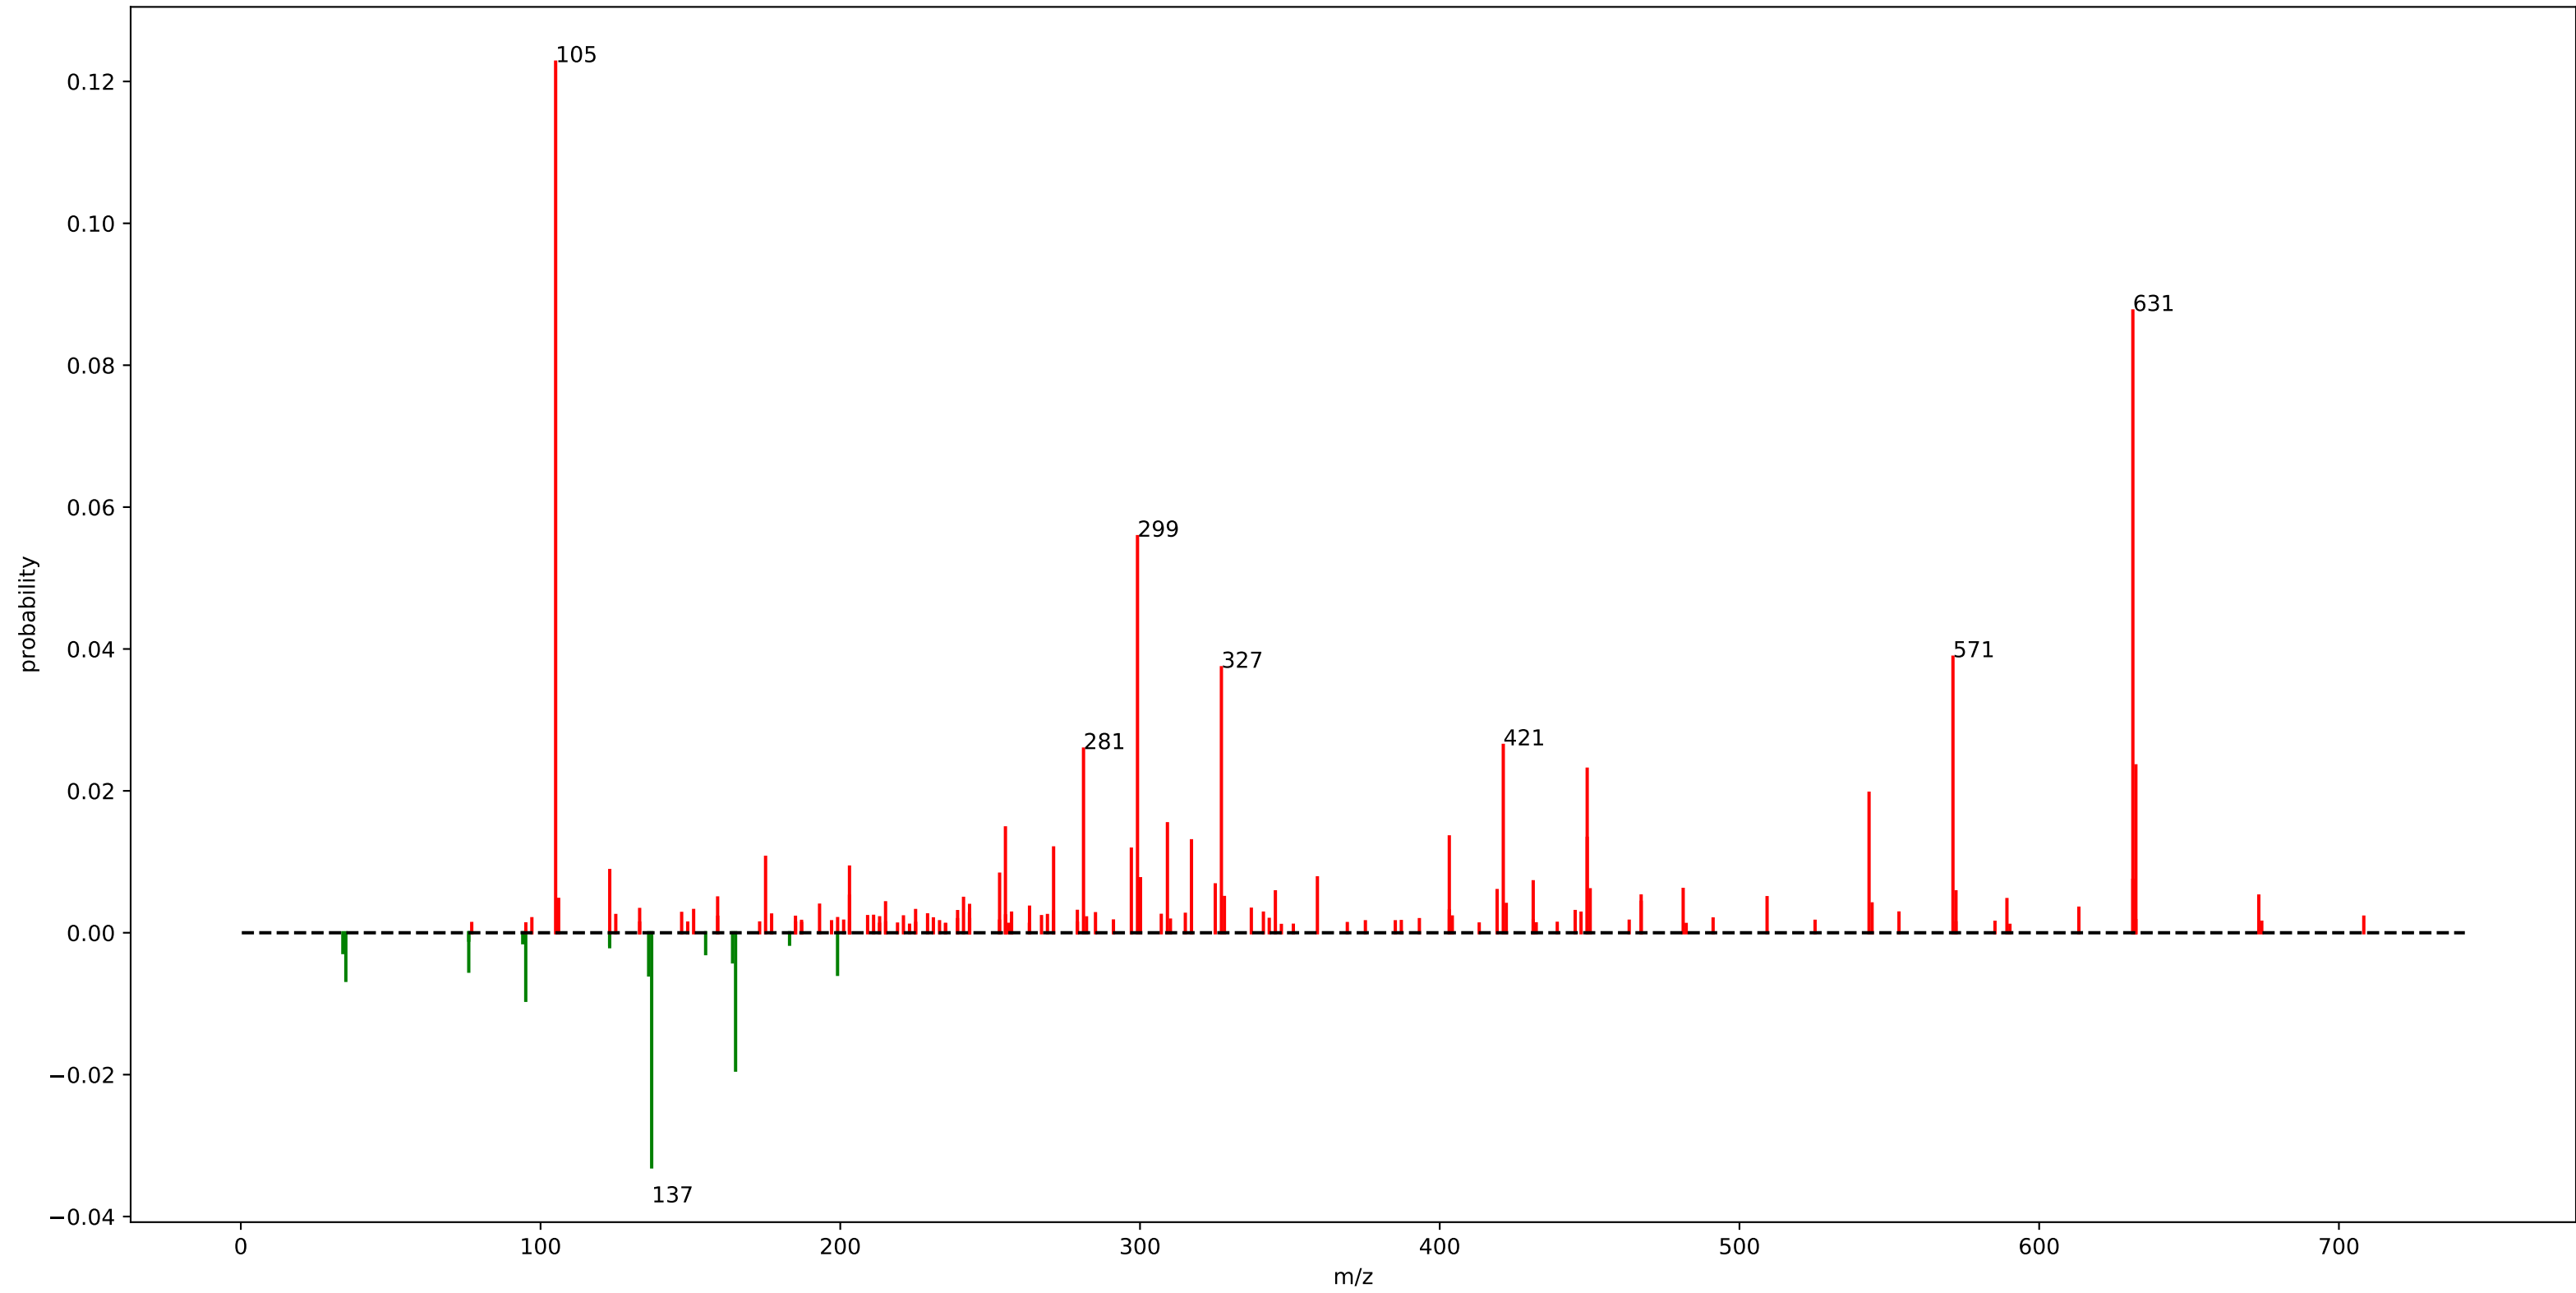

# euphorbia\_motif\_260.m2m

|                   |        |                   |        |                   |        |
|-------------------|--------|-------------------|--------|-------------------|--------|
| fragment_105.0325 | : 0.12 | loss_95.0625      | : 0.01 | fragment_203.0675 | : 0.01 |
| fragment_631.2575 | : 0.09 | fragment_203.0725 | : 0.01 |                   |        |
| fragment_299.1625 | : 0.06 | fragment_123.0825 | : 0.01 |                   |        |
| fragment_571.2325 | : 0.04 | fragment_253.1575 | : 0.01 |                   |        |
| fragment_327.1575 | : 0.04 | fragment_359.1825 | : 0.01 |                   |        |
| loss_137.0725     | : 0.03 | fragment_300.1675 | : 0.01 |                   |        |
| fragment_421.2025 | : 0.03 | fragment_631.2525 | : 0.01 |                   |        |
| fragment_281.1525 | : 0.03 | fragment_431.1875 | : 0.01 |                   |        |
| fragment_632.2575 | : 0.02 | fragment_325.1075 | : 0.01 |                   |        |
| fragment_449.1975 | : 0.02 | loss_35.0375      | : 0.01 |                   |        |
| fragment_543.2375 | : 0.02 | fragment_481.2225 | : 0.01 |                   |        |
| loss_165.0675     | : 0.02 | fragment_450.1975 | : 0.01 |                   |        |
| fragment_309.1475 | : 0.02 | loss_136.0675     | : 0.01 |                   |        |
| fragment_255.1025 | : 0.01 | fragment_419.1475 | : 0.01 |                   |        |
| fragment_403.1925 | : 0.01 | loss_199.0875     | : 0.01 |                   |        |
| fragment_449.1925 | : 0.01 | fragment_572.2375 | : 0.01 |                   |        |
| fragment_317.1725 | : 0.01 | fragment_345.1675 | : 0.01 |                   |        |
| fragment_271.1675 | : 0.01 | loss_76.0475      | : 0.01 |                   |        |
| fragment_297.1125 | : 0.01 | fragment_467.2025 | : 0.01 |                   |        |
| fragment_175.0775 | : 0.01 | fragment_673.2675 | : 0.01 |                   |        |

motif\_454

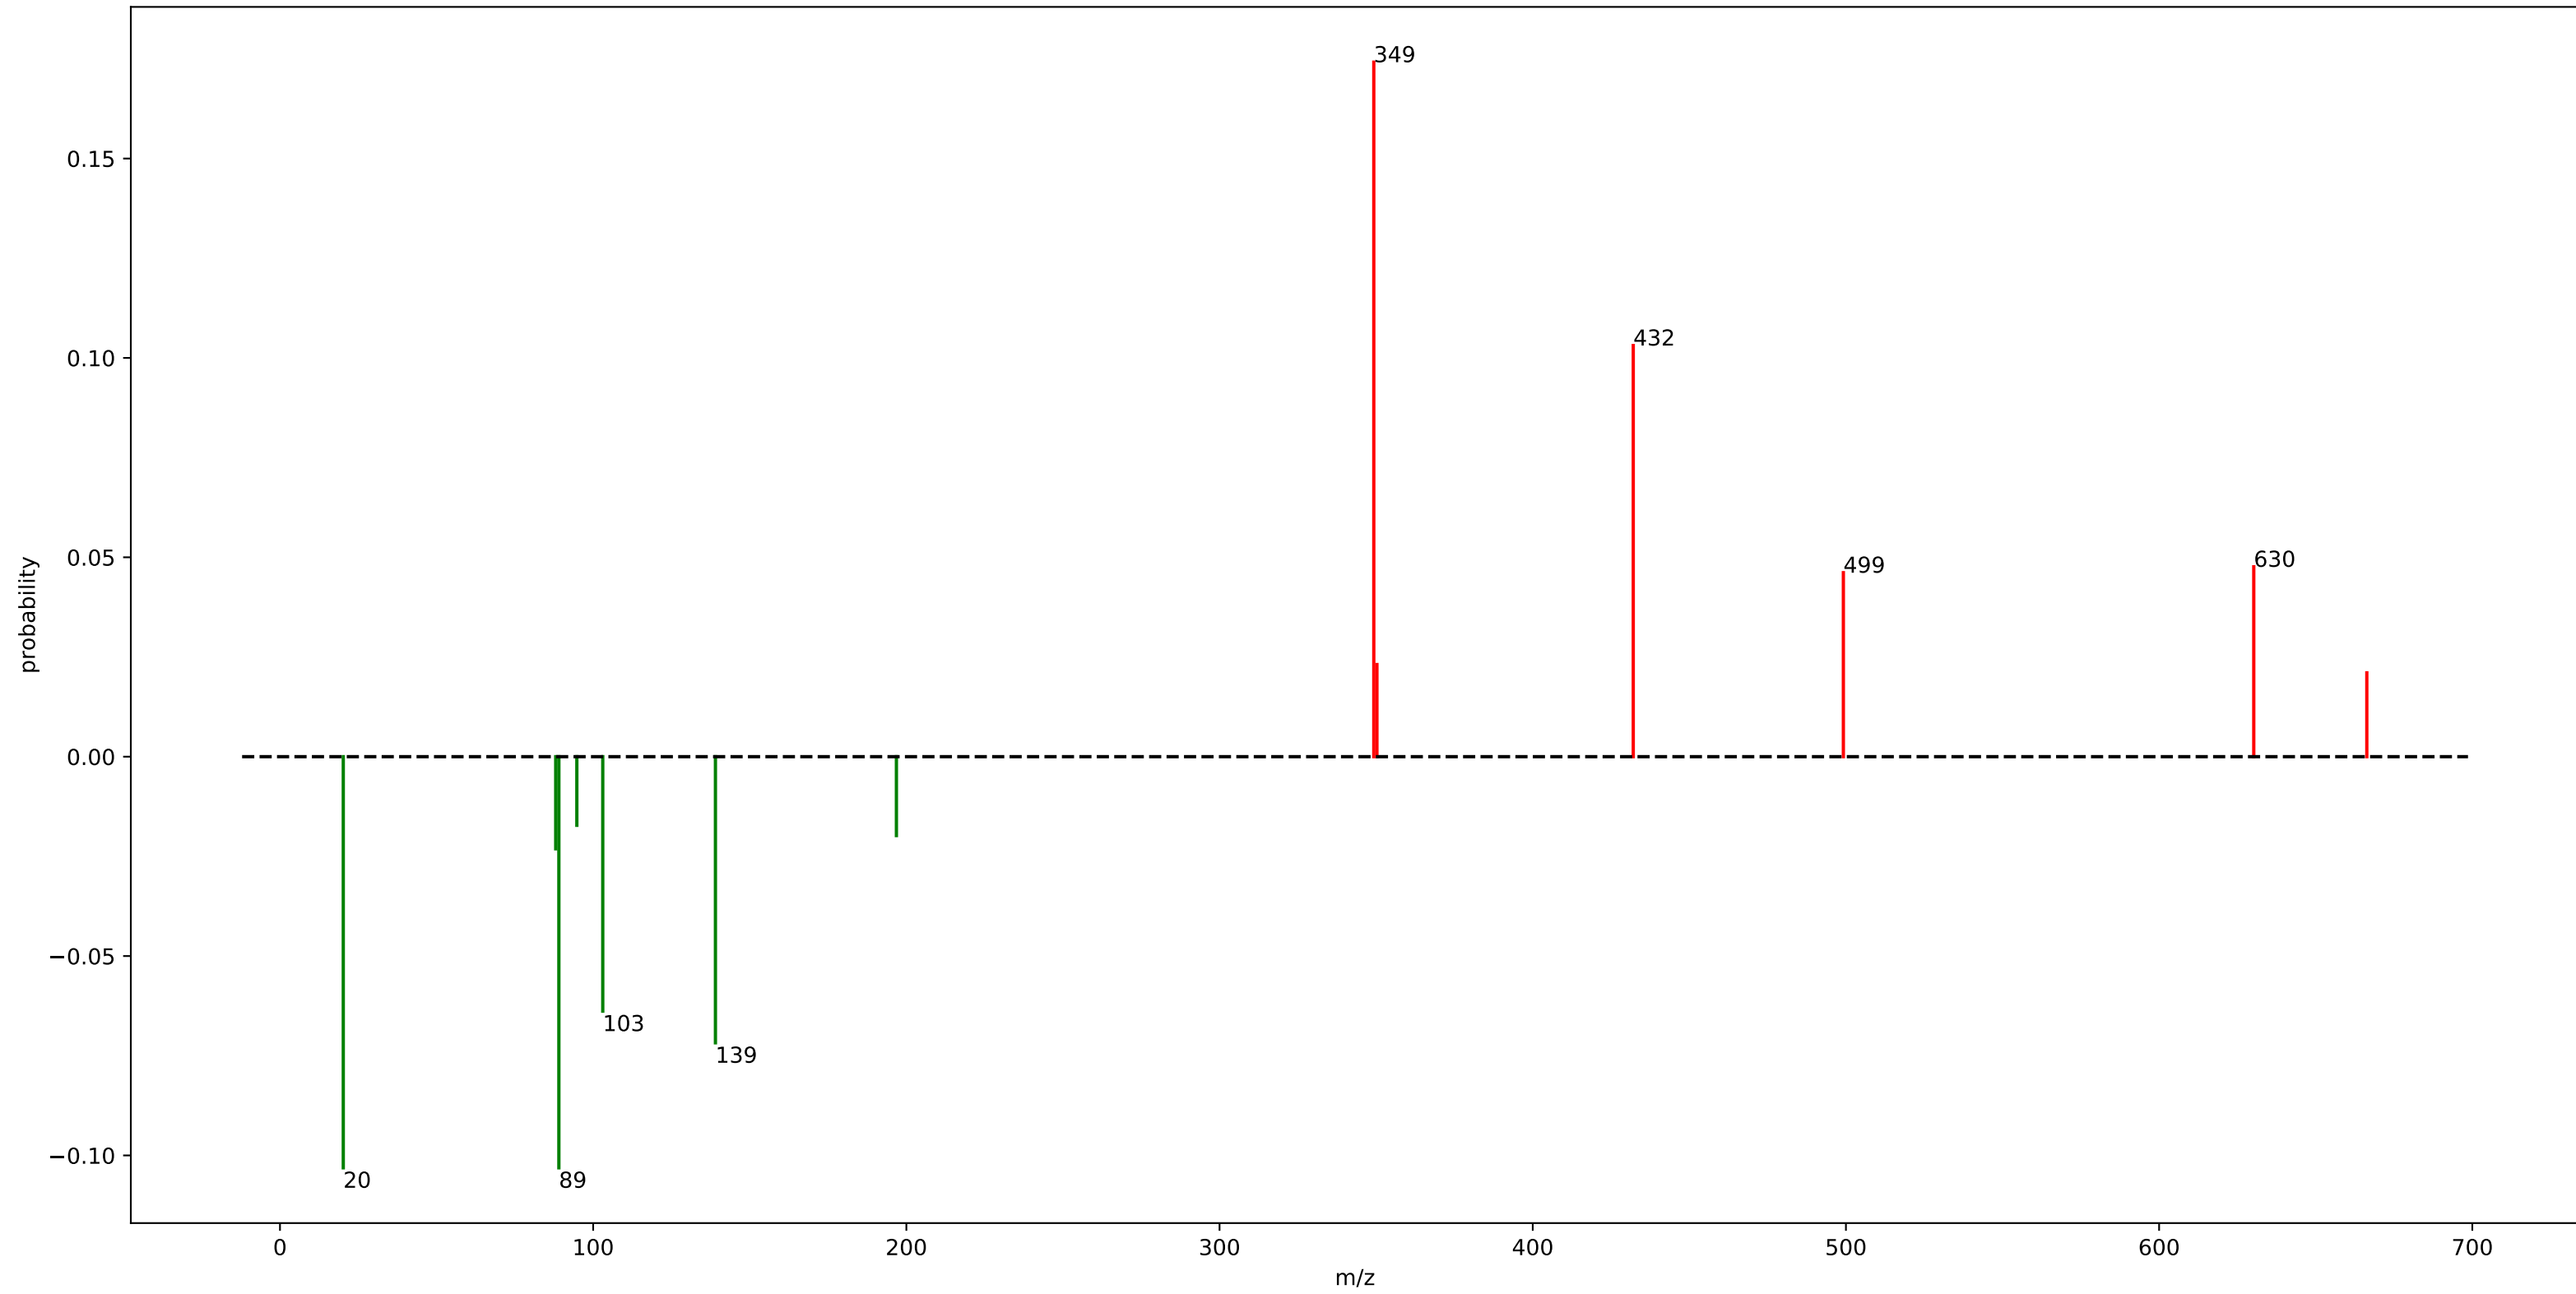

## motif\_454

|                   |        |
|-------------------|--------|
| fragment_349.2475 | : 0.17 |
| loss_89.0475      | : 0.10 |
| fragment_432.0975 | : 0.10 |
| loss_20.2125      | : 0.10 |
| loss_139.0375     | : 0.07 |
| loss_103.0625     | : 0.06 |
| fragment_630.2225 | : 0.05 |
| fragment_499.1825 | : 0.05 |
| fragment_350.2525 | : 0.02 |
| loss_88.0425      | : 0.02 |
| fragment_666.3175 | : 0.02 |
| loss_196.8225     | : 0.02 |
| loss_94.7875      | : 0.02 |



motif\_455

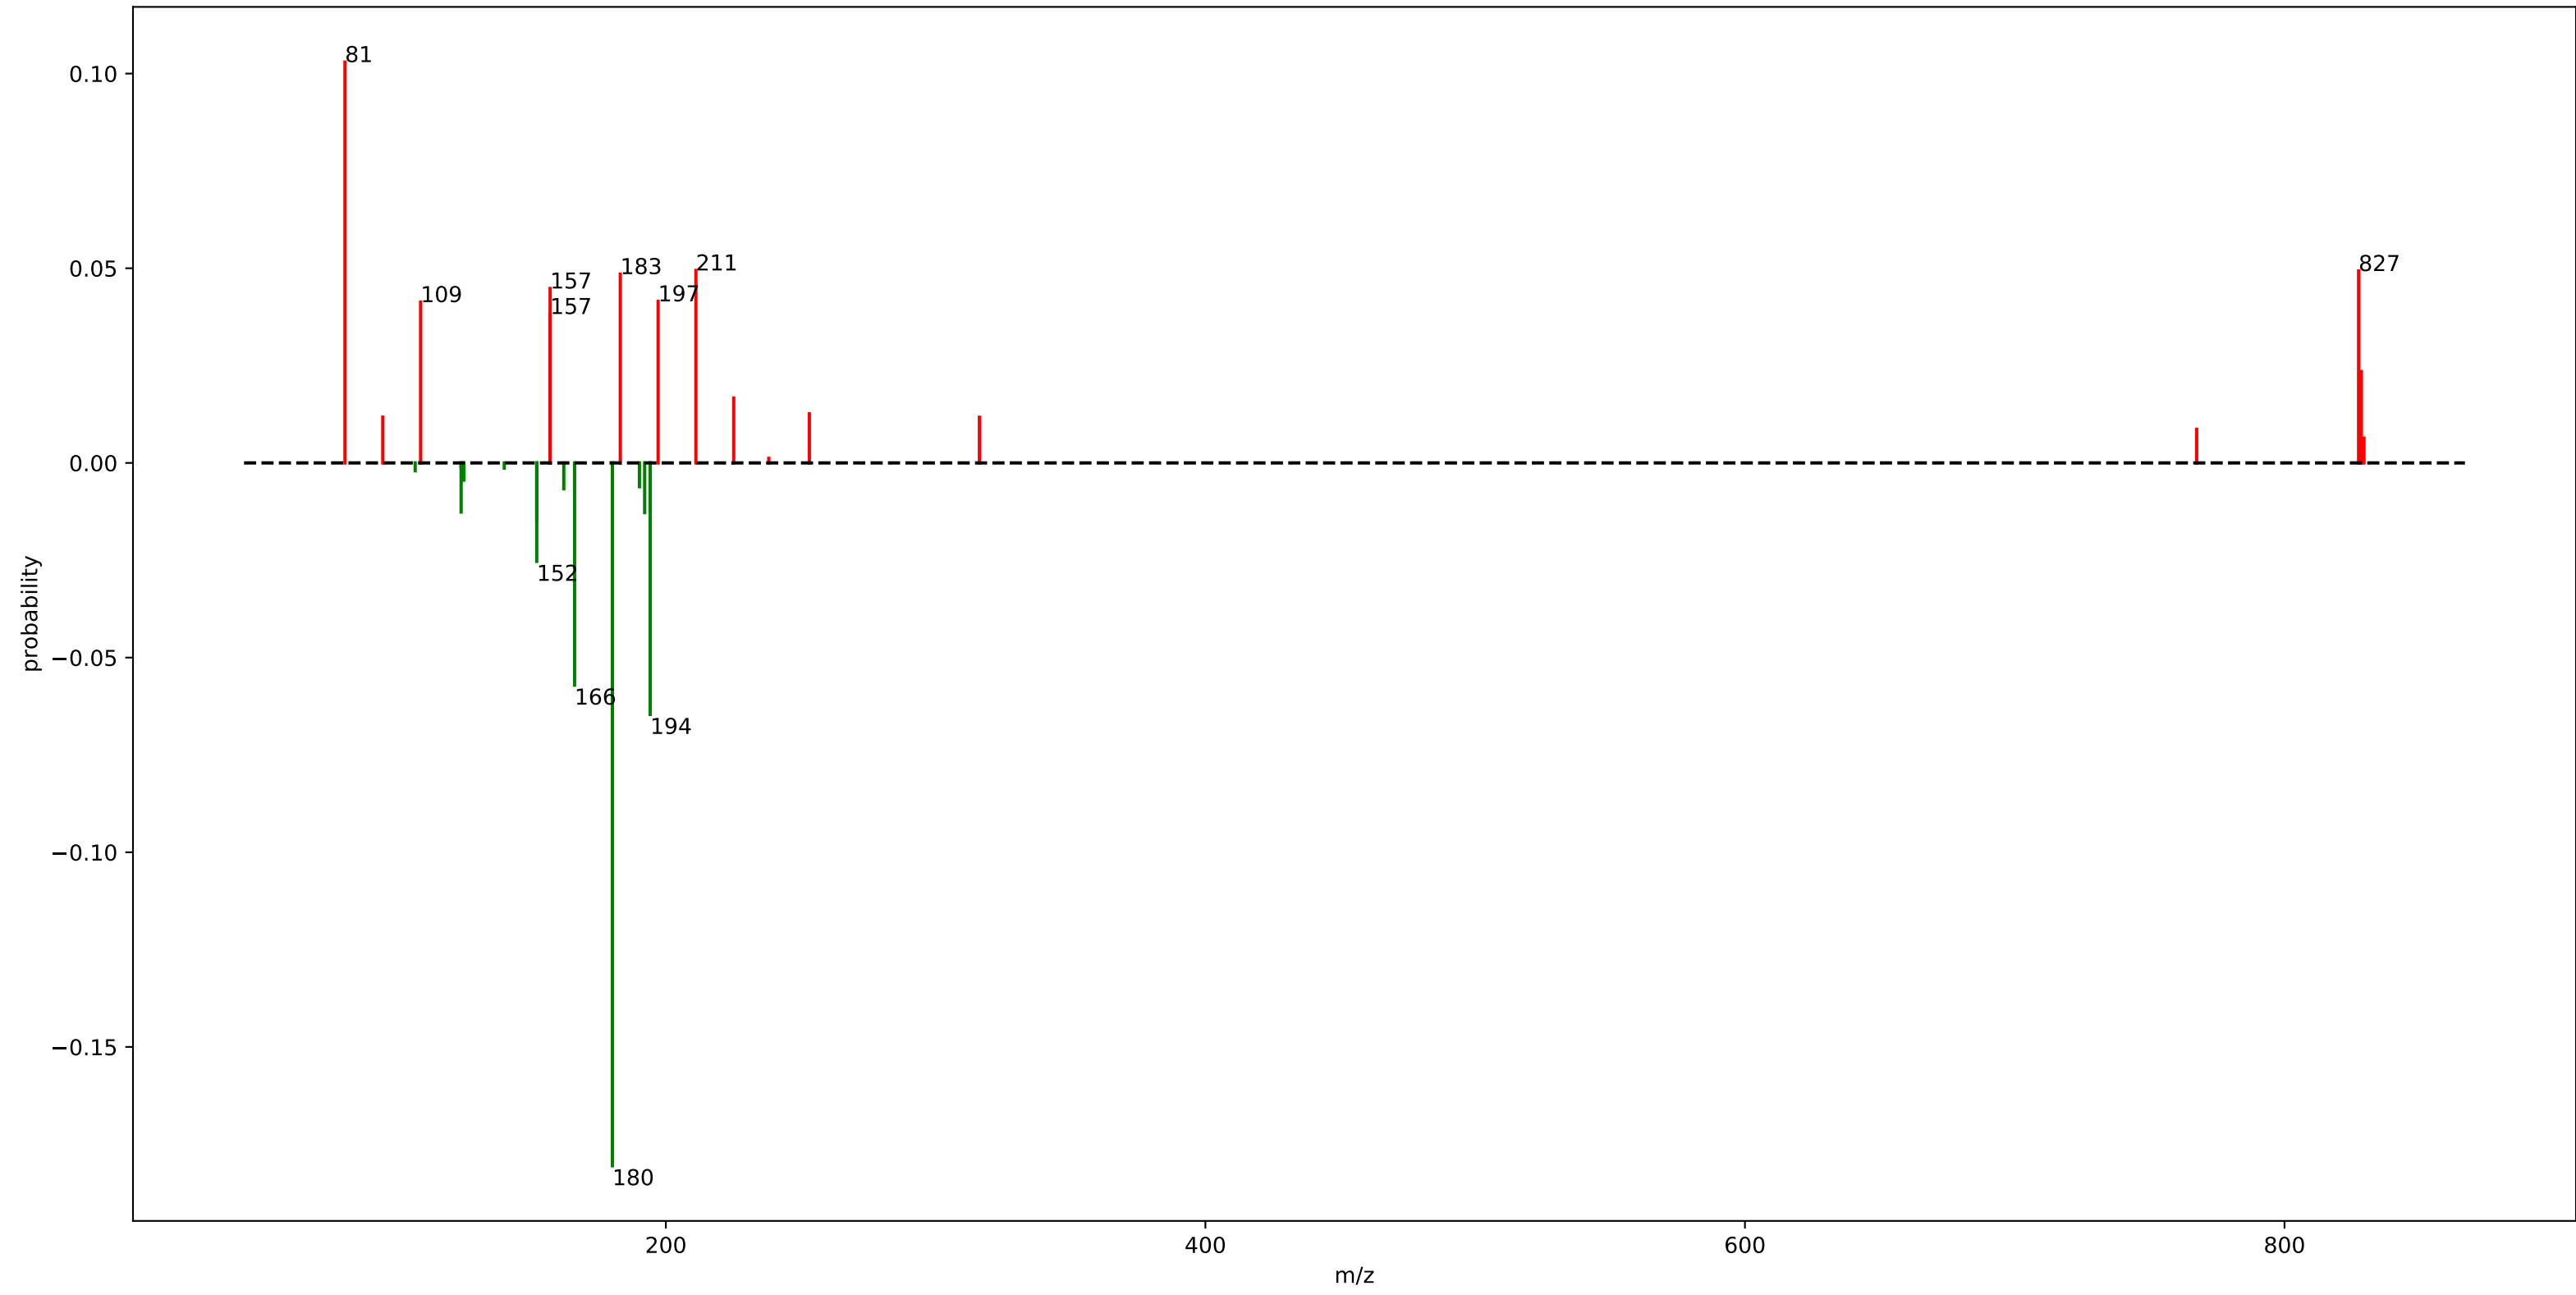

## motif\_455

|                   |        |                   |        |
|-------------------|--------|-------------------|--------|
| loss_180.1875     | : 0.18 | fragment_316.2275 | : 0.01 |
| fragment_81.0675  | : 0.10 | fragment_767.4325 | : 0.01 |
| loss_194.2025     | : 0.06 | loss_162.1725     | : 0.01 |
| loss_166.1725     | : 0.06 | fragment_829.4625 | : 0.01 |
| fragment_211.1475 | : 0.05 | loss_190.2075     | : 0.01 |
| fragment_827.4575 | : 0.05 |                   |        |
| fragment_183.1175 | : 0.05 |                   |        |
| fragment_157.1025 | : 0.04 |                   |        |
| fragment_197.1325 | : 0.04 |                   |        |
| fragment_109.0975 | : 0.04 |                   |        |
| fragment_157.0975 | : 0.04 |                   |        |
| loss_152.1525     | : 0.03 |                   |        |
| fragment_828.4575 | : 0.02 |                   |        |
| fragment_225.1625 | : 0.02 |                   |        |
| loss_152.1575     | : 0.01 |                   |        |
| loss_192.1475     | : 0.01 |                   |        |
| fragment_253.1925 | : 0.01 |                   |        |
| loss_124.1225     | : 0.01 |                   |        |
| loss_194.1875     | : 0.01 |                   |        |
| fragment_95.0825  | : 0.01 |                   |        |

motif\_452

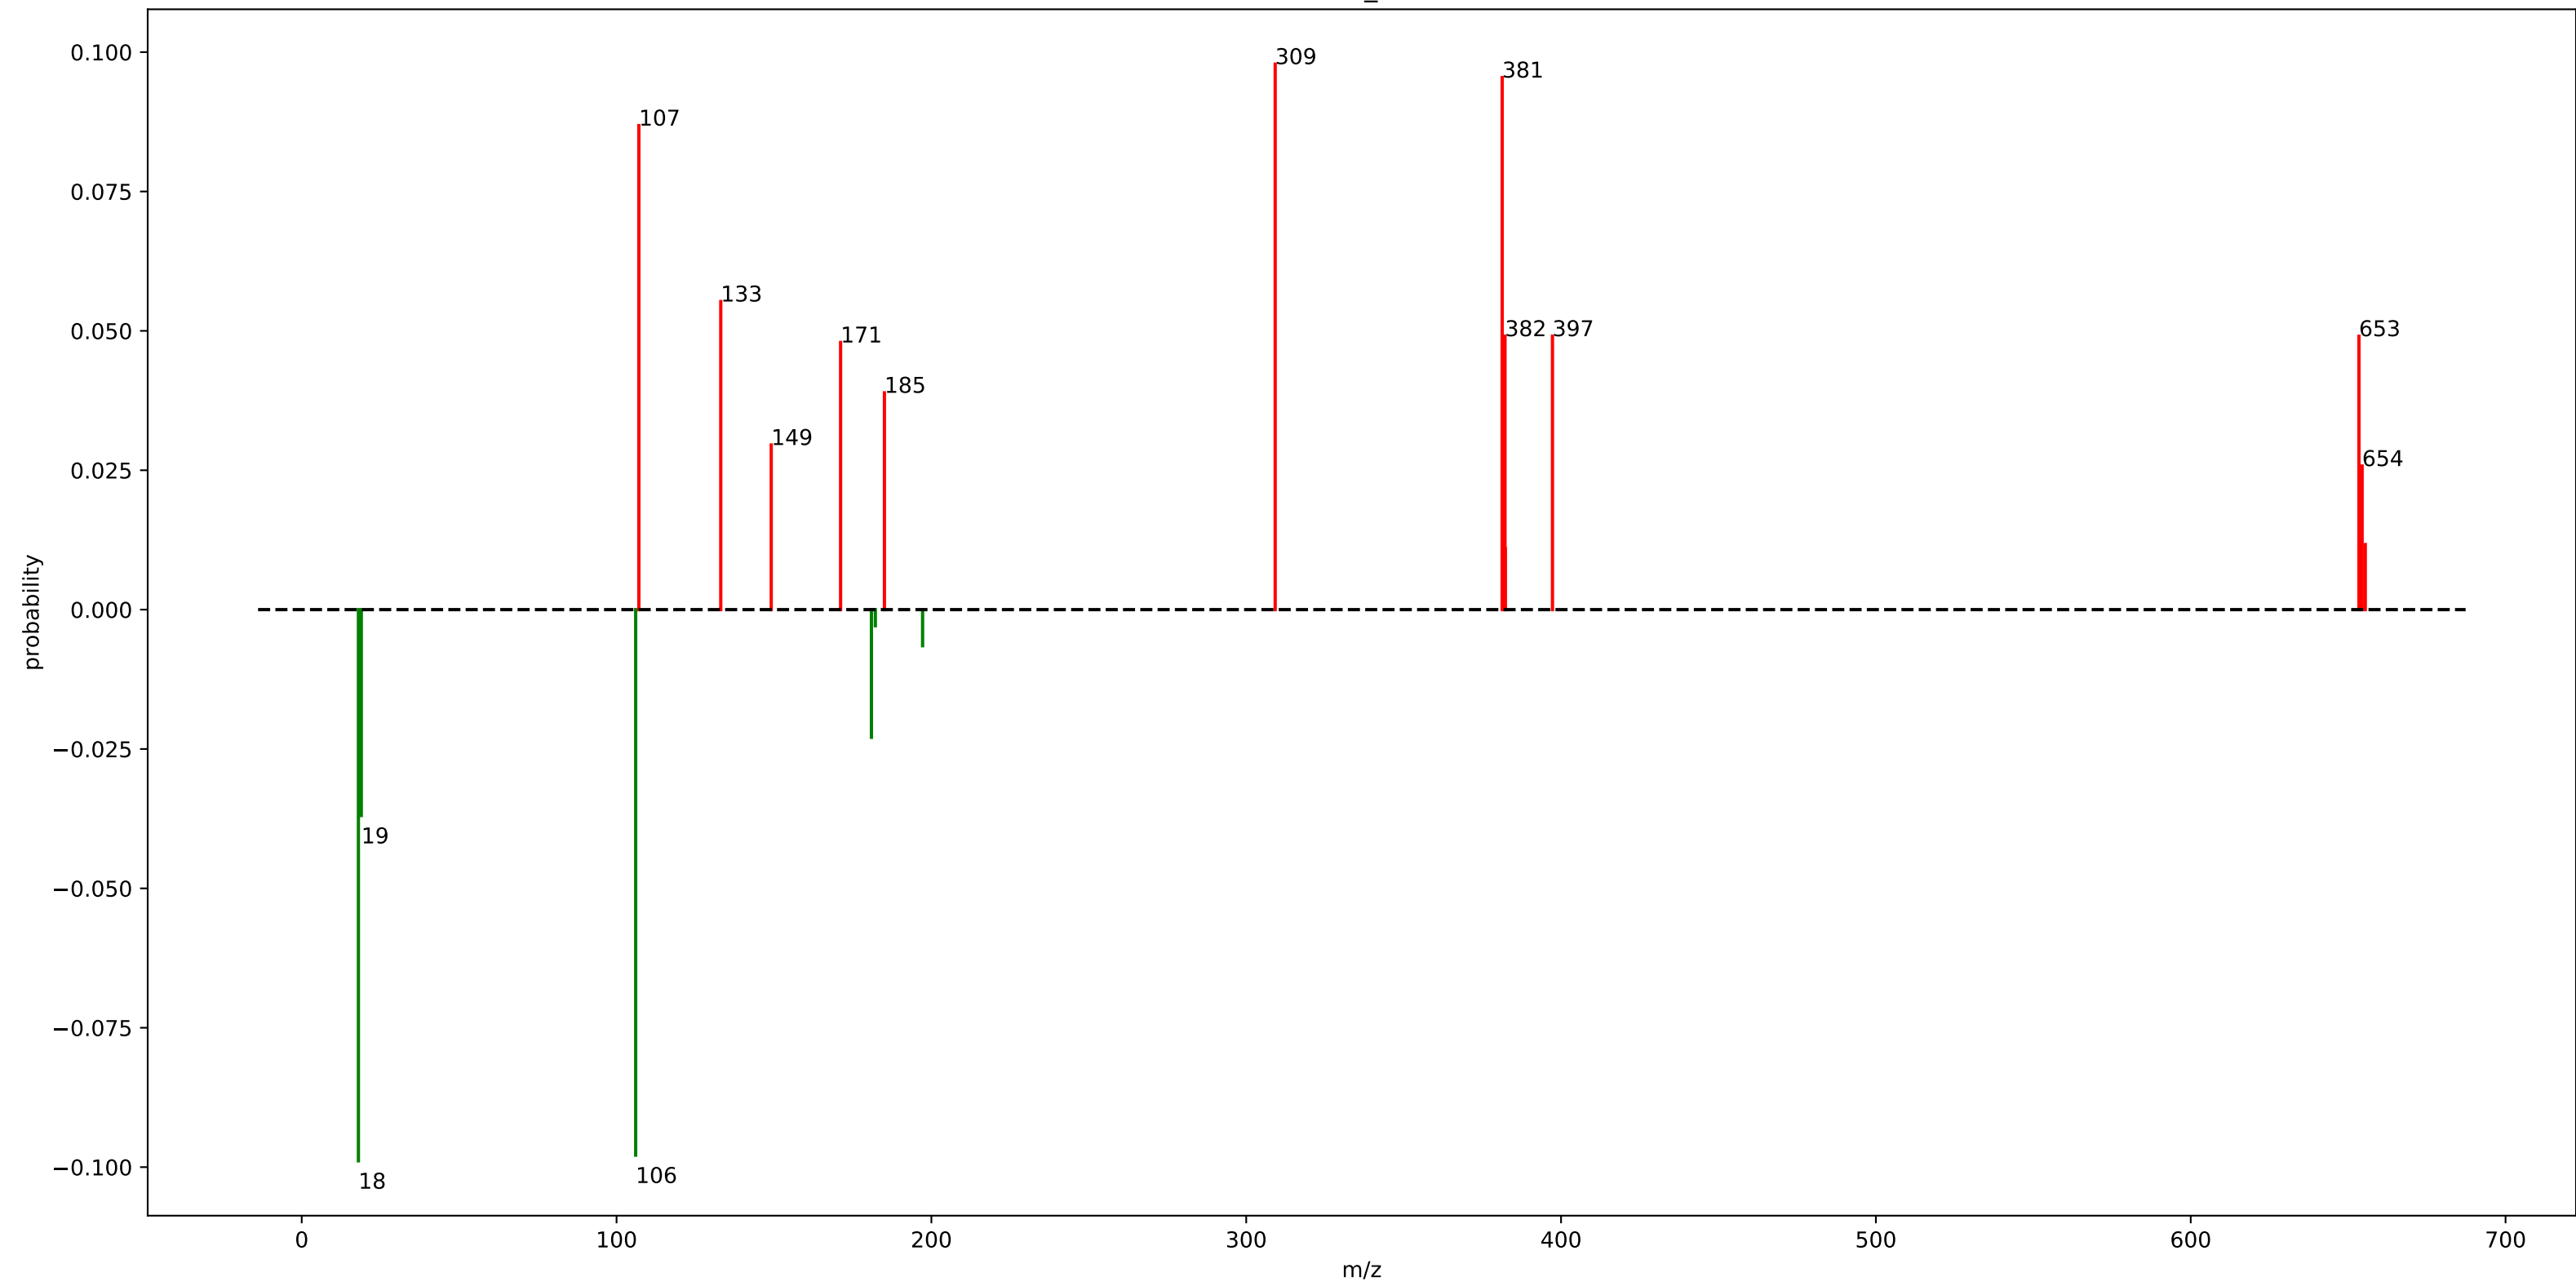

## motif\_452

|                   |        |
|-------------------|--------|
| loss_18.0075      | : 0.10 |
| loss_106.0775     | : 0.10 |
| fragment_309.2025 | : 0.10 |
| fragment_381.2975 | : 0.10 |
| fragment_107.0825 | : 0.09 |
| fragment_133.1025 | : 0.06 |
| fragment_397.2725 | : 0.05 |
| fragment_653.4375 | : 0.05 |
| fragment_382.1975 | : 0.05 |
| fragment_171.1625 | : 0.05 |
| fragment_185.0825 | : 0.04 |
| loss_18.9275      | : 0.04 |
| fragment_149.1325 | : 0.03 |
| fragment_654.4425 | : 0.03 |
| loss_180.9525     | : 0.02 |
| fragment_655.4425 | : 0.01 |
| fragment_382.3025 | : 0.01 |
| loss_197.2075     | : 0.01 |

urine\_mass2motif\_186.m2m

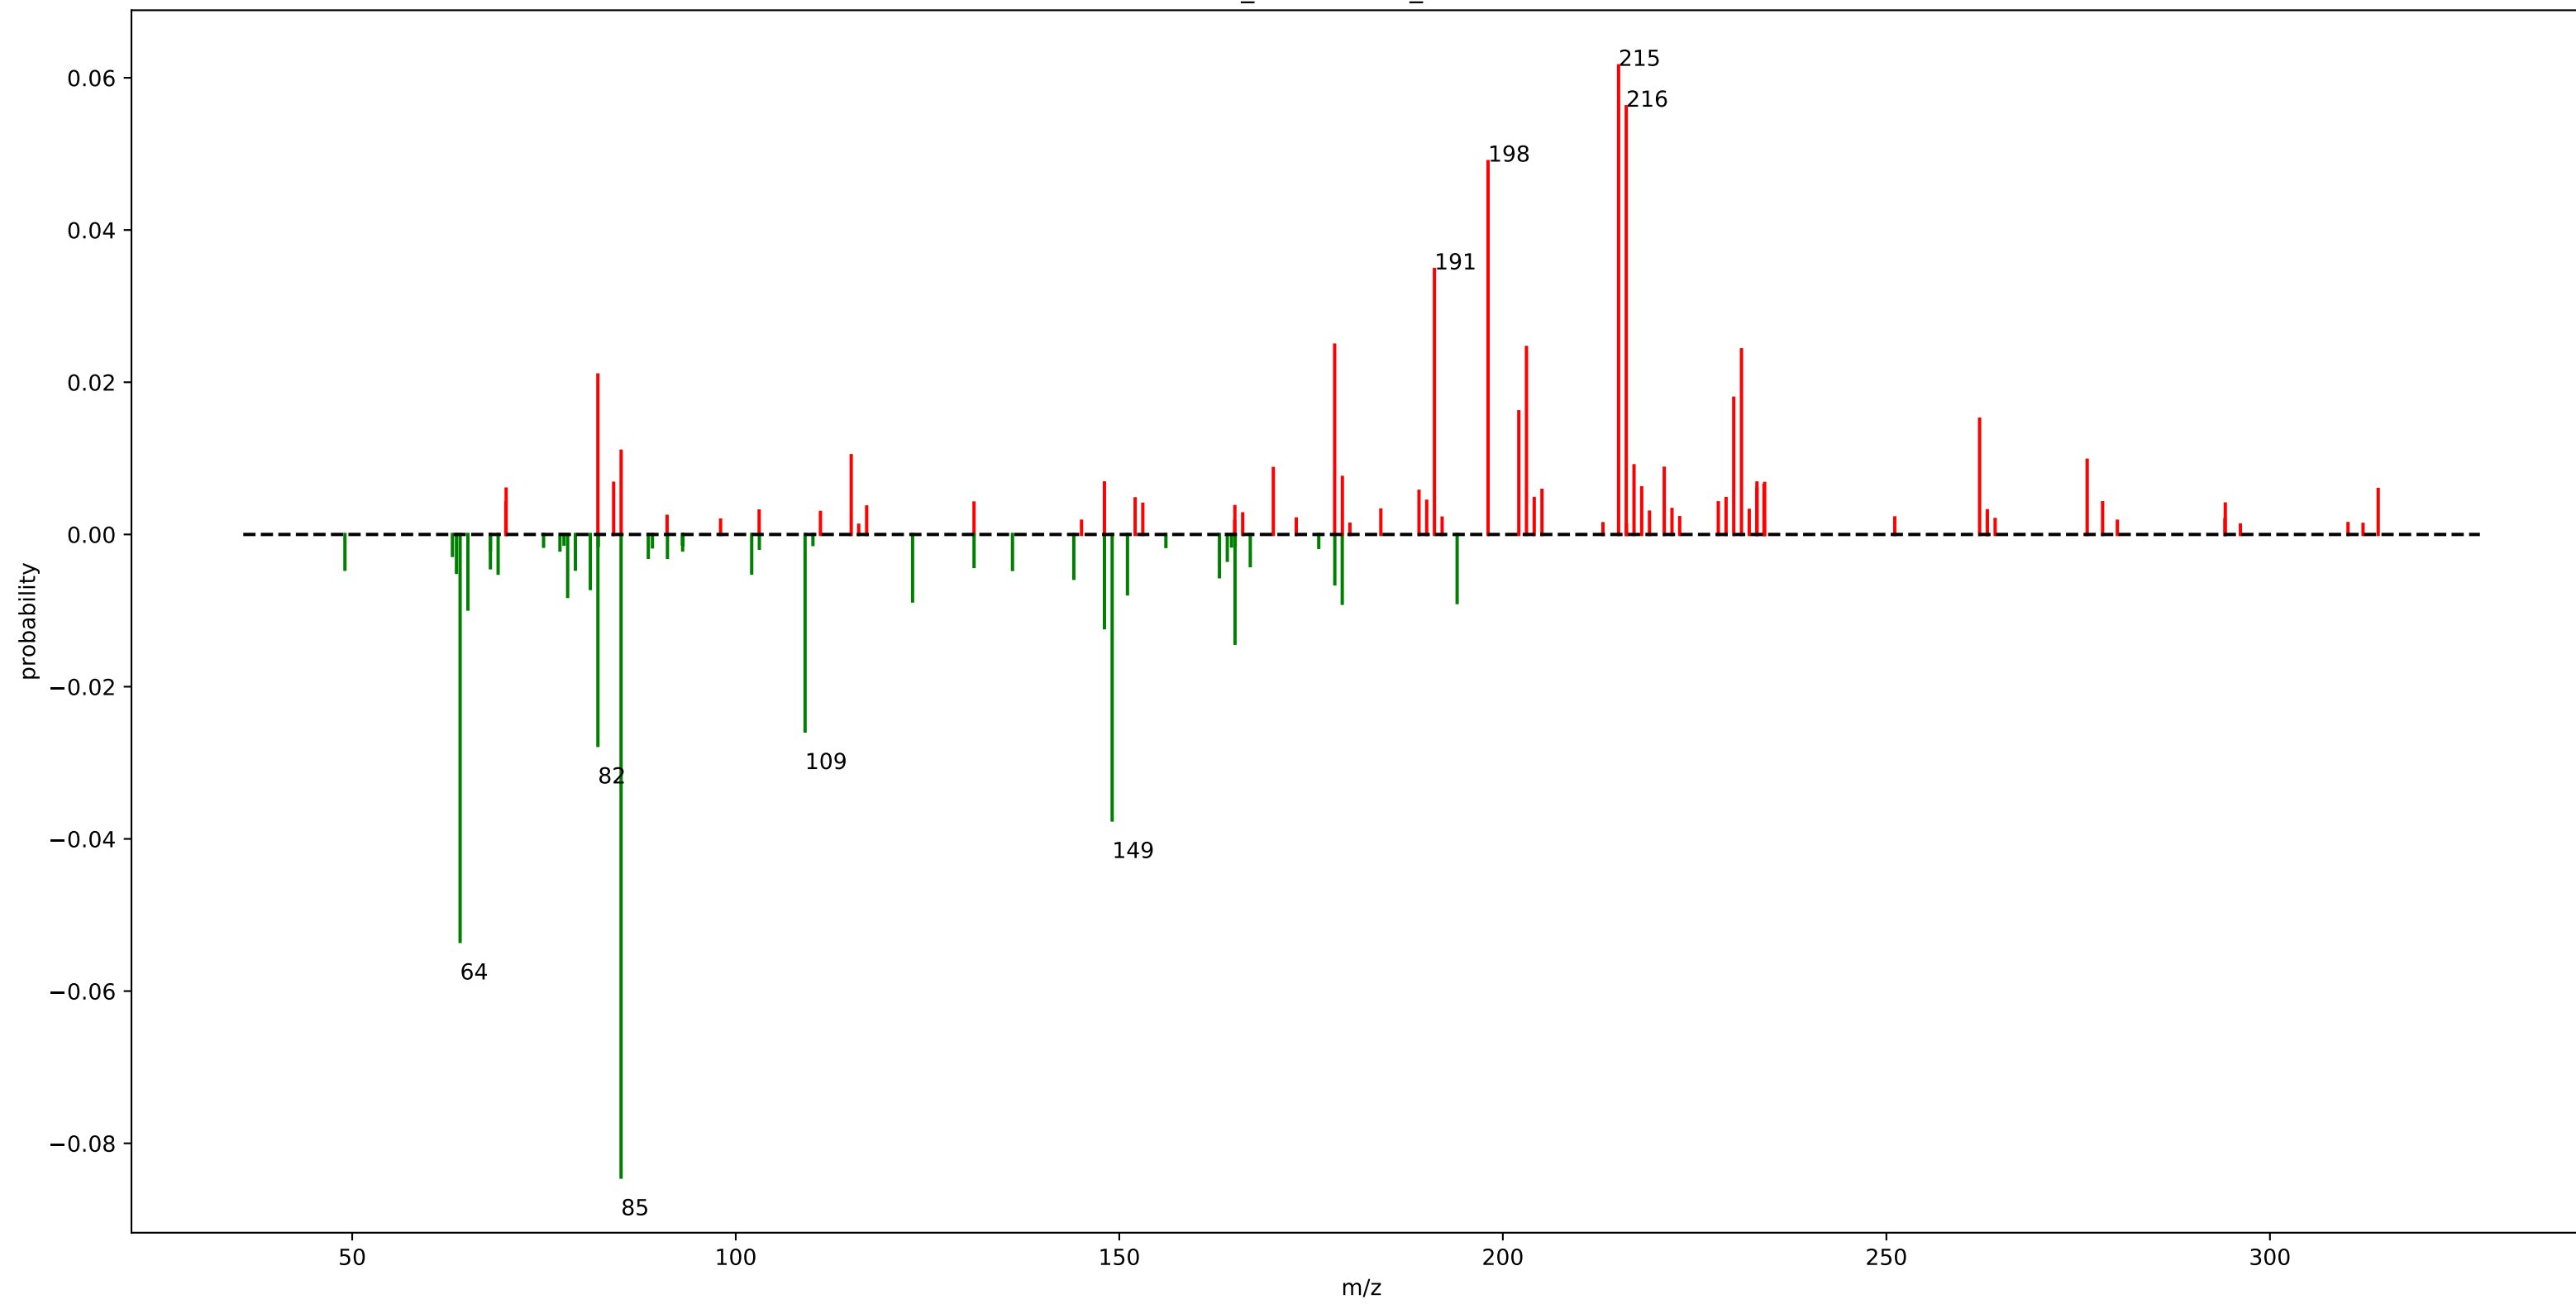

# urine\_mass2motif\_186.m2m

|                   |        |                   |        |                   |        |
|-------------------|--------|-------------------|--------|-------------------|--------|
| loss_85.0525      | : 0.08 | loss_65.0825      | : 0.01 | fragment_70.0675  | : 0.01 |
| fragment_215.0875 | : 0.06 | fragment_276.1775 | : 0.01 | fragment_314.1175 | : 0.01 |
| fragment_216.0875 | : 0.06 | loss_179.0675     | : 0.01 | fragment_205.1025 | : 0.01 |
| loss_64.0675      | : 0.05 | fragment_217.1025 | : 0.01 | loss_144.0725     | : 0.01 |
| fragment_198.0775 | : 0.05 | loss_194.0425     | : 0.01 | fragment_189.0725 | : 0.01 |
| loss_149.0725     | : 0.04 | loss_123.0525     | : 0.01 | loss_163.0575     | : 0.01 |
| fragment_191.0825 | : 0.03 | fragment_221.0425 | : 0.01 | loss_69.0225      | : 0.01 |
| loss_82.0325      | : 0.03 | fragment_170.0825 | : 0.01 | loss_102.0775     | : 0.01 |
| loss_109.0375     | : 0.03 | loss_78.0875      | : 0.01 |                   |        |
| fragment_178.0775 | : 0.02 | loss_151.0675     | : 0.01 |                   |        |
| fragment_203.0825 | : 0.02 | fragment_179.0825 | : 0.01 |                   |        |
| fragment_231.1125 | : 0.02 | loss_81.0425      | : 0.01 |                   |        |
| fragment_82.0275  | : 0.02 | fragment_148.0625 | : 0.01 |                   |        |
| fragment_230.1025 | : 0.02 | fragment_233.1275 | : 0.01 |                   |        |
| fragment_202.0825 | : 0.02 | fragment_84.0825  | : 0.01 |                   |        |
| fragment_262.1575 | : 0.02 | fragment_234.1325 | : 0.01 |                   |        |
| loss_165.0875     | : 0.01 | loss_178.0975     | : 0.01 |                   |        |
| loss_148.0675     | : 0.01 | fragment_234.0475 | : 0.01 |                   |        |
| fragment_85.0575  | : 0.01 | fragment_218.1025 | : 0.01 |                   |        |
| fragment_115.0525 | : 0.01 | fragment_233.1225 | : 0.01 |                   |        |

motif\_450

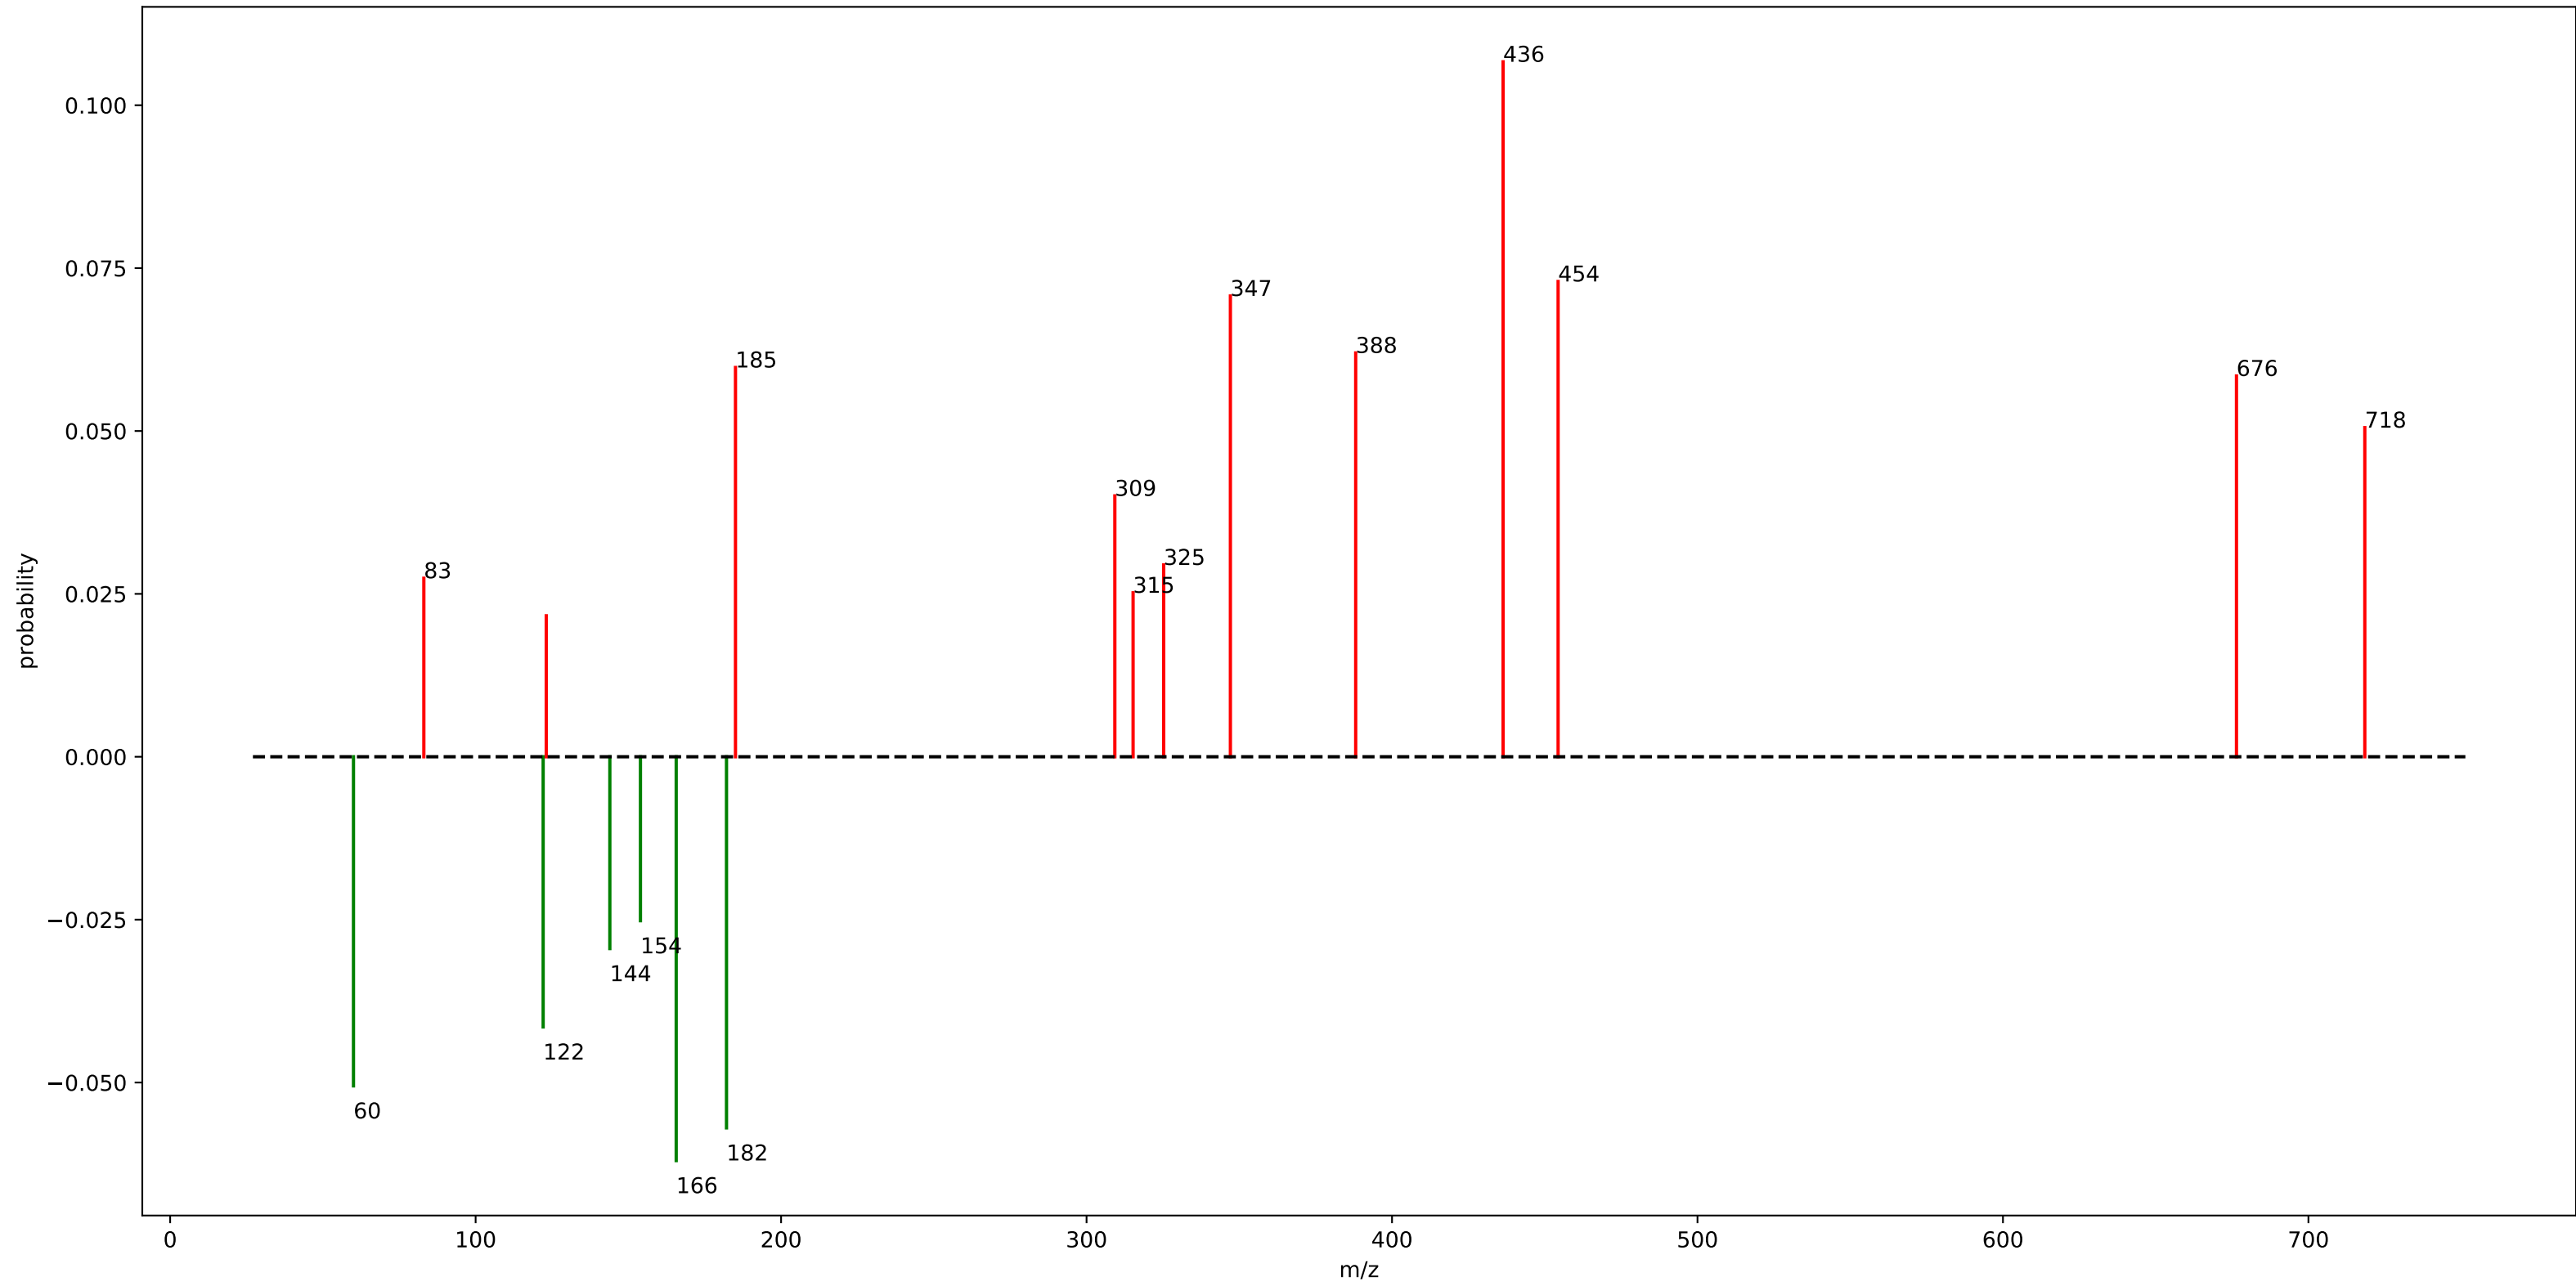

## motif\_450

|                   |        |
|-------------------|--------|
| fragment_436.3575 | : 0.11 |
| fragment_454.3675 | : 0.07 |
| fragment_347.0825 | : 0.07 |
| loss_165.6625     | : 0.06 |
| fragment_388.1075 | : 0.06 |
| fragment_185.0675 | : 0.06 |
| fragment_676.4425 | : 0.06 |
| loss_182.1275     | : 0.06 |
| fragment_718.4575 | : 0.05 |
| loss_60.0125      | : 0.05 |
| loss_122.1075     | : 0.04 |
| fragment_309.2575 | : 0.04 |
| loss_143.9375     | : 0.03 |
| fragment_325.2525 | : 0.03 |
| fragment_83.0475  | : 0.03 |
| loss_153.9575     | : 0.03 |
| fragment_315.2325 | : 0.03 |
| fragment_123.1175 | : 0.02 |



motif\_451

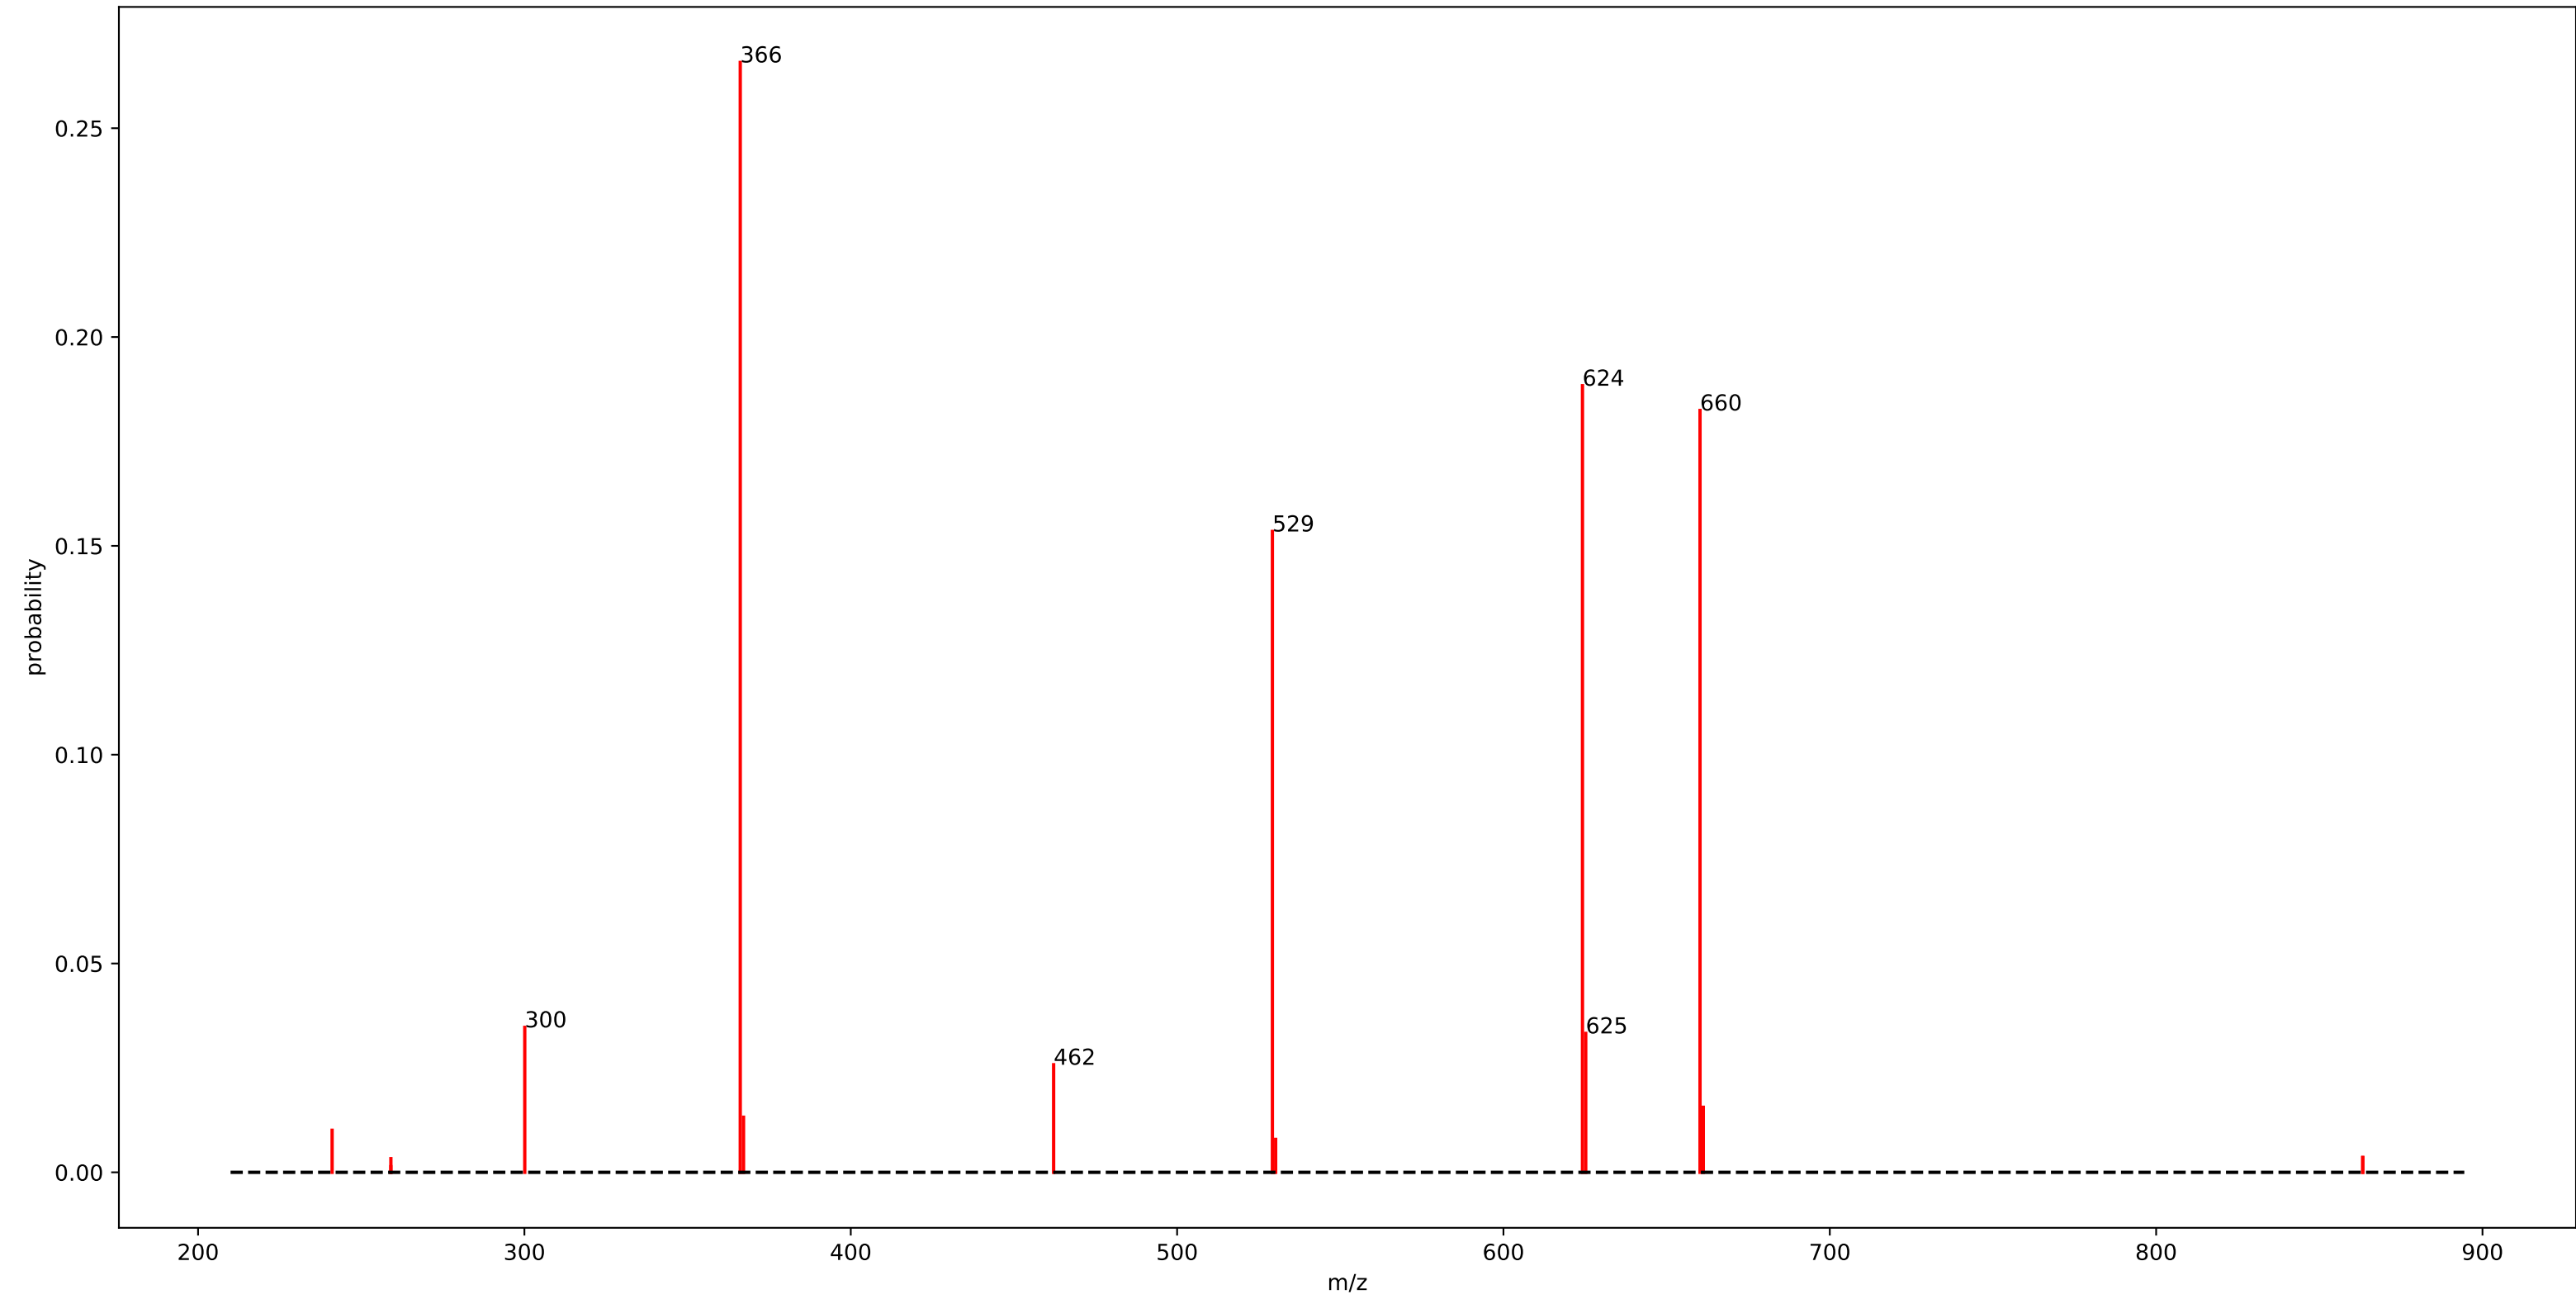

## motif\_451

|                   |        |
|-------------------|--------|
| fragment_366.1375 | : 0.27 |
| fragment_624.2125 | : 0.19 |
| fragment_660.2325 | : 0.18 |
| fragment_529.1975 | : 0.15 |
| fragment_300.1075 | : 0.03 |
| fragment_625.2175 | : 0.03 |
| fragment_462.1625 | : 0.03 |
| fragment_661.2375 | : 0.02 |
| fragment_367.1425 | : 0.01 |
| fragment_241.0725 | : 0.01 |
| fragment_530.1975 | : 0.01 |

motif\_517

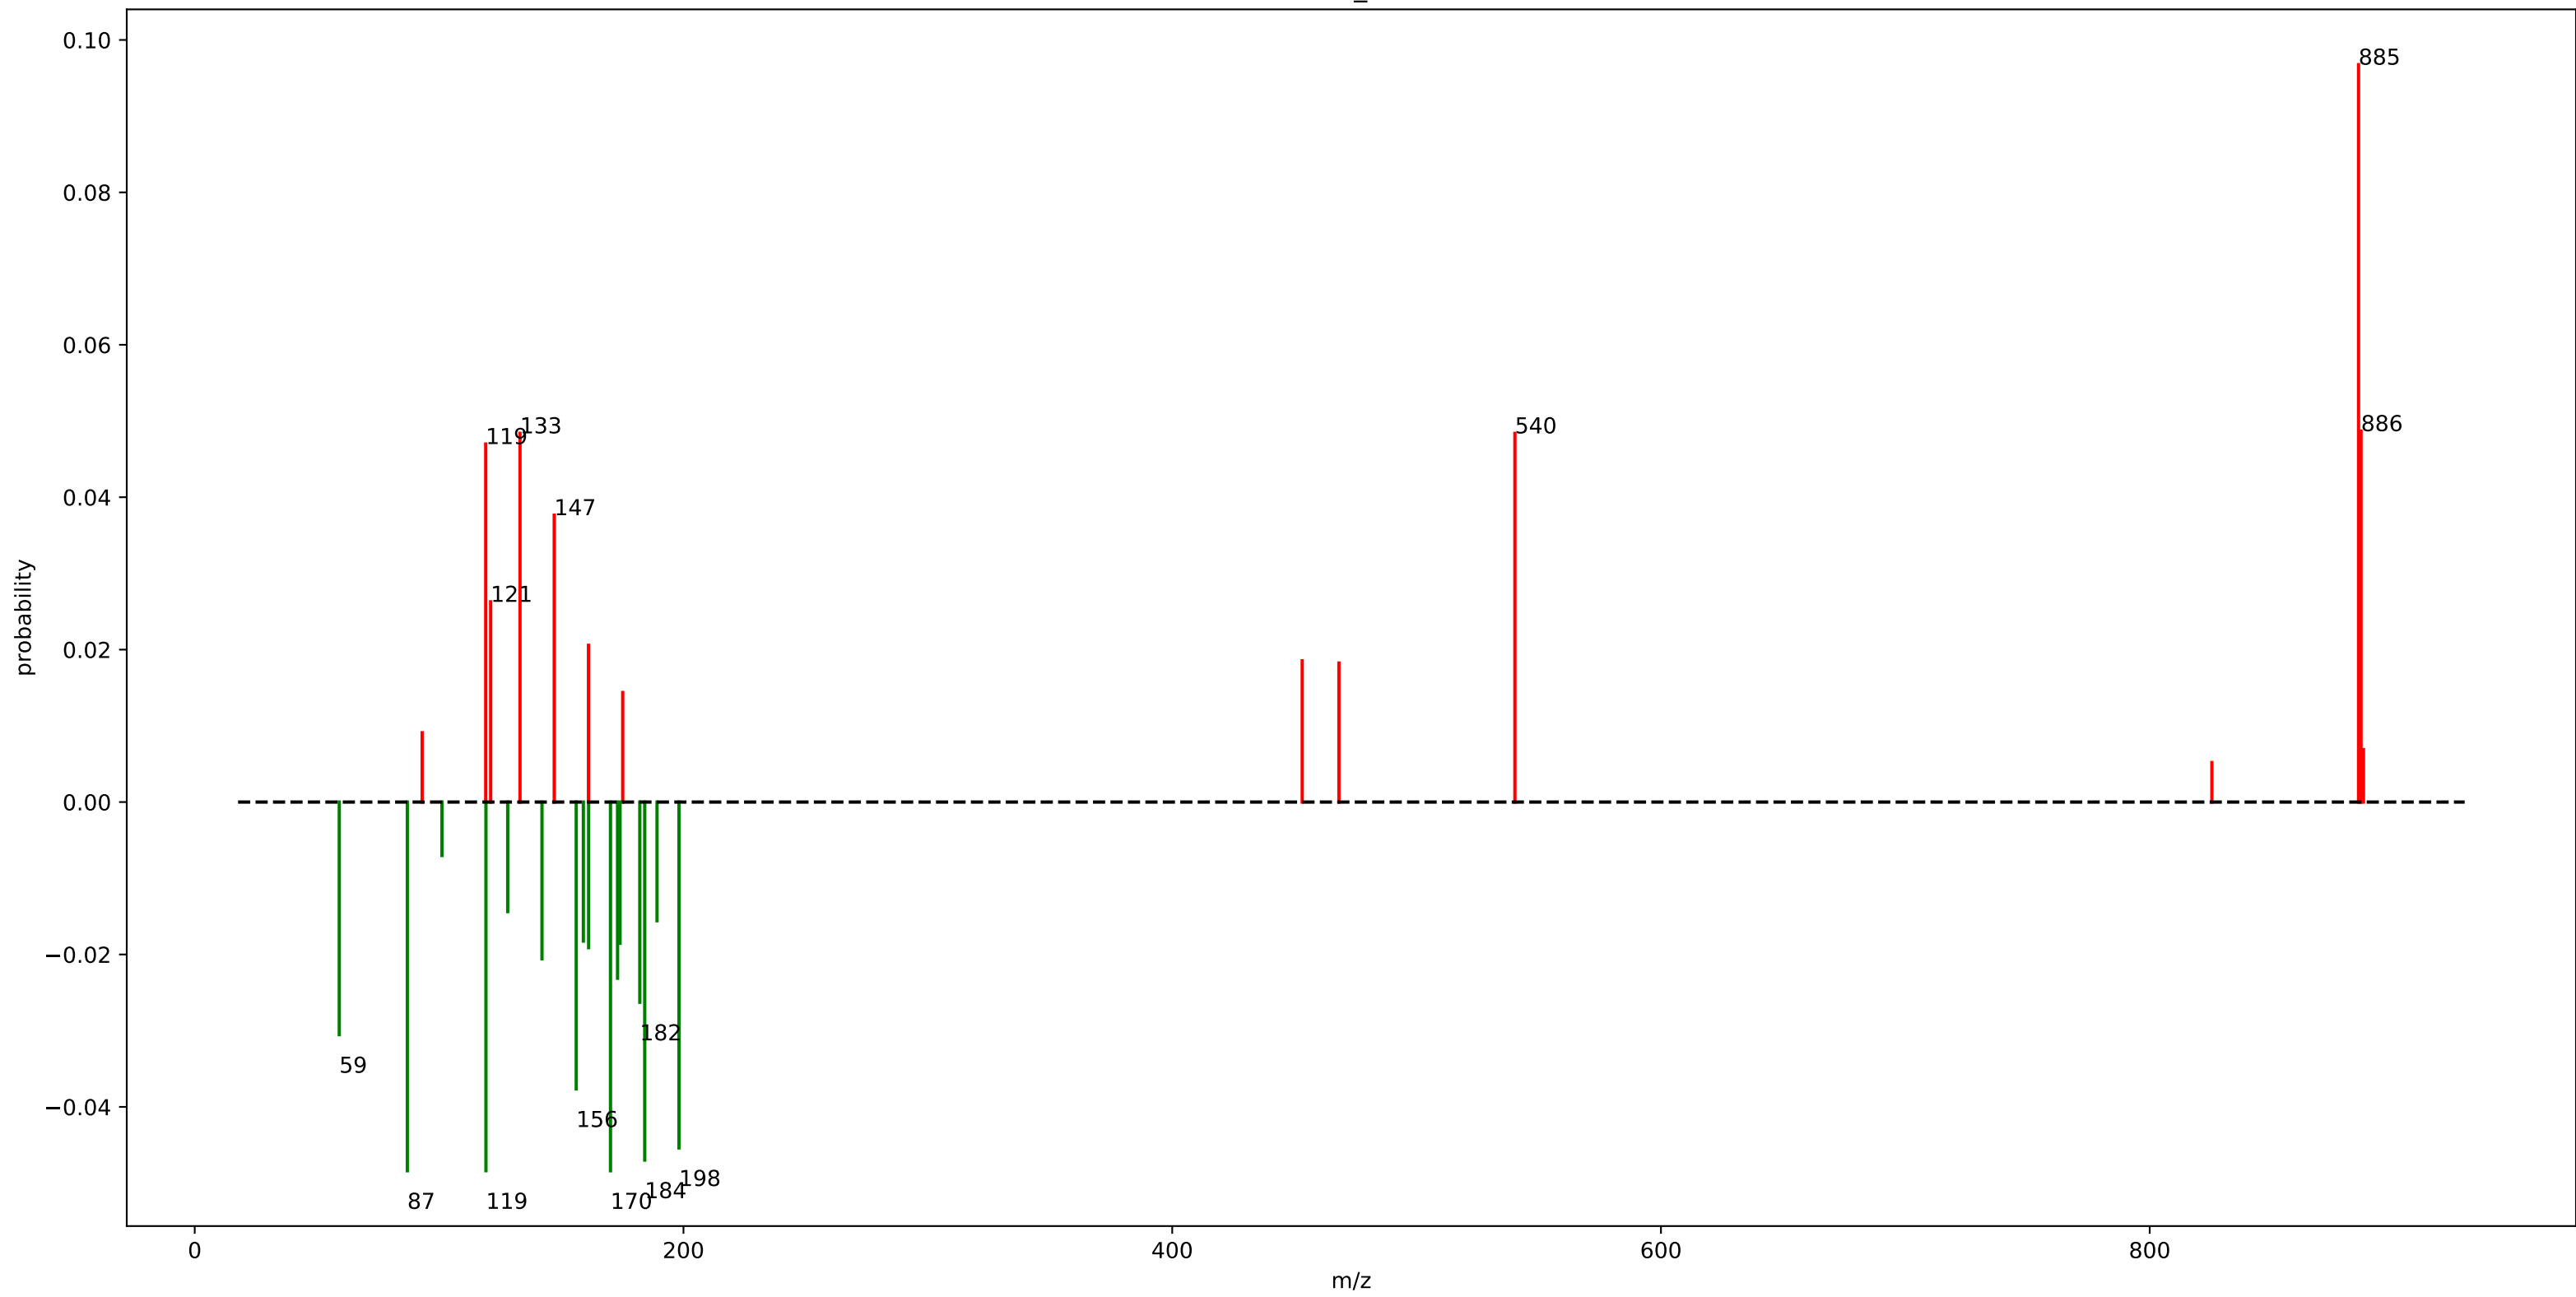

# motif\_517

|                   |        |                   |        |
|-------------------|--------|-------------------|--------|
| fragment_885.4625 | : 0.10 | loss_174.0475     | : 0.02 |
| fragment_886.4675 | : 0.05 | fragment_468.2175 | : 0.02 |
| fragment_133.1025 | : 0.05 | loss_159.0275     | : 0.02 |
| loss_170.1325     | : 0.05 | loss_189.1825     | : 0.02 |
| loss_87.0025      | : 0.05 | loss_128.0825     | : 0.01 |
| fragment_540.2375 | : 0.05 | fragment_175.1475 | : 0.01 |
| loss_119.1725     | : 0.05 | fragment_93.0675  | : 0.01 |
| fragment_119.0825 | : 0.05 | loss_101.1625     | : 0.01 |
| loss_184.1475     | : 0.05 | fragment_887.4675 | : 0.01 |
| loss_198.1625     | : 0.05 | fragment_825.4425 | : 0.01 |
| fragment_147.1175 | : 0.04 |                   |        |
| loss_156.1125     | : 0.04 |                   |        |
| loss_59.1525      | : 0.03 |                   |        |
| fragment_121.1025 | : 0.03 |                   |        |
| loss_182.1275     | : 0.03 |                   |        |
| loss_173.0275     | : 0.02 |                   |        |
| loss_142.0975     | : 0.02 |                   |        |
| fragment_161.1325 | : 0.02 |                   |        |
| loss_161.1875     | : 0.02 |                   |        |
| fragment_453.1925 | : 0.02 |                   |        |

motif\_516

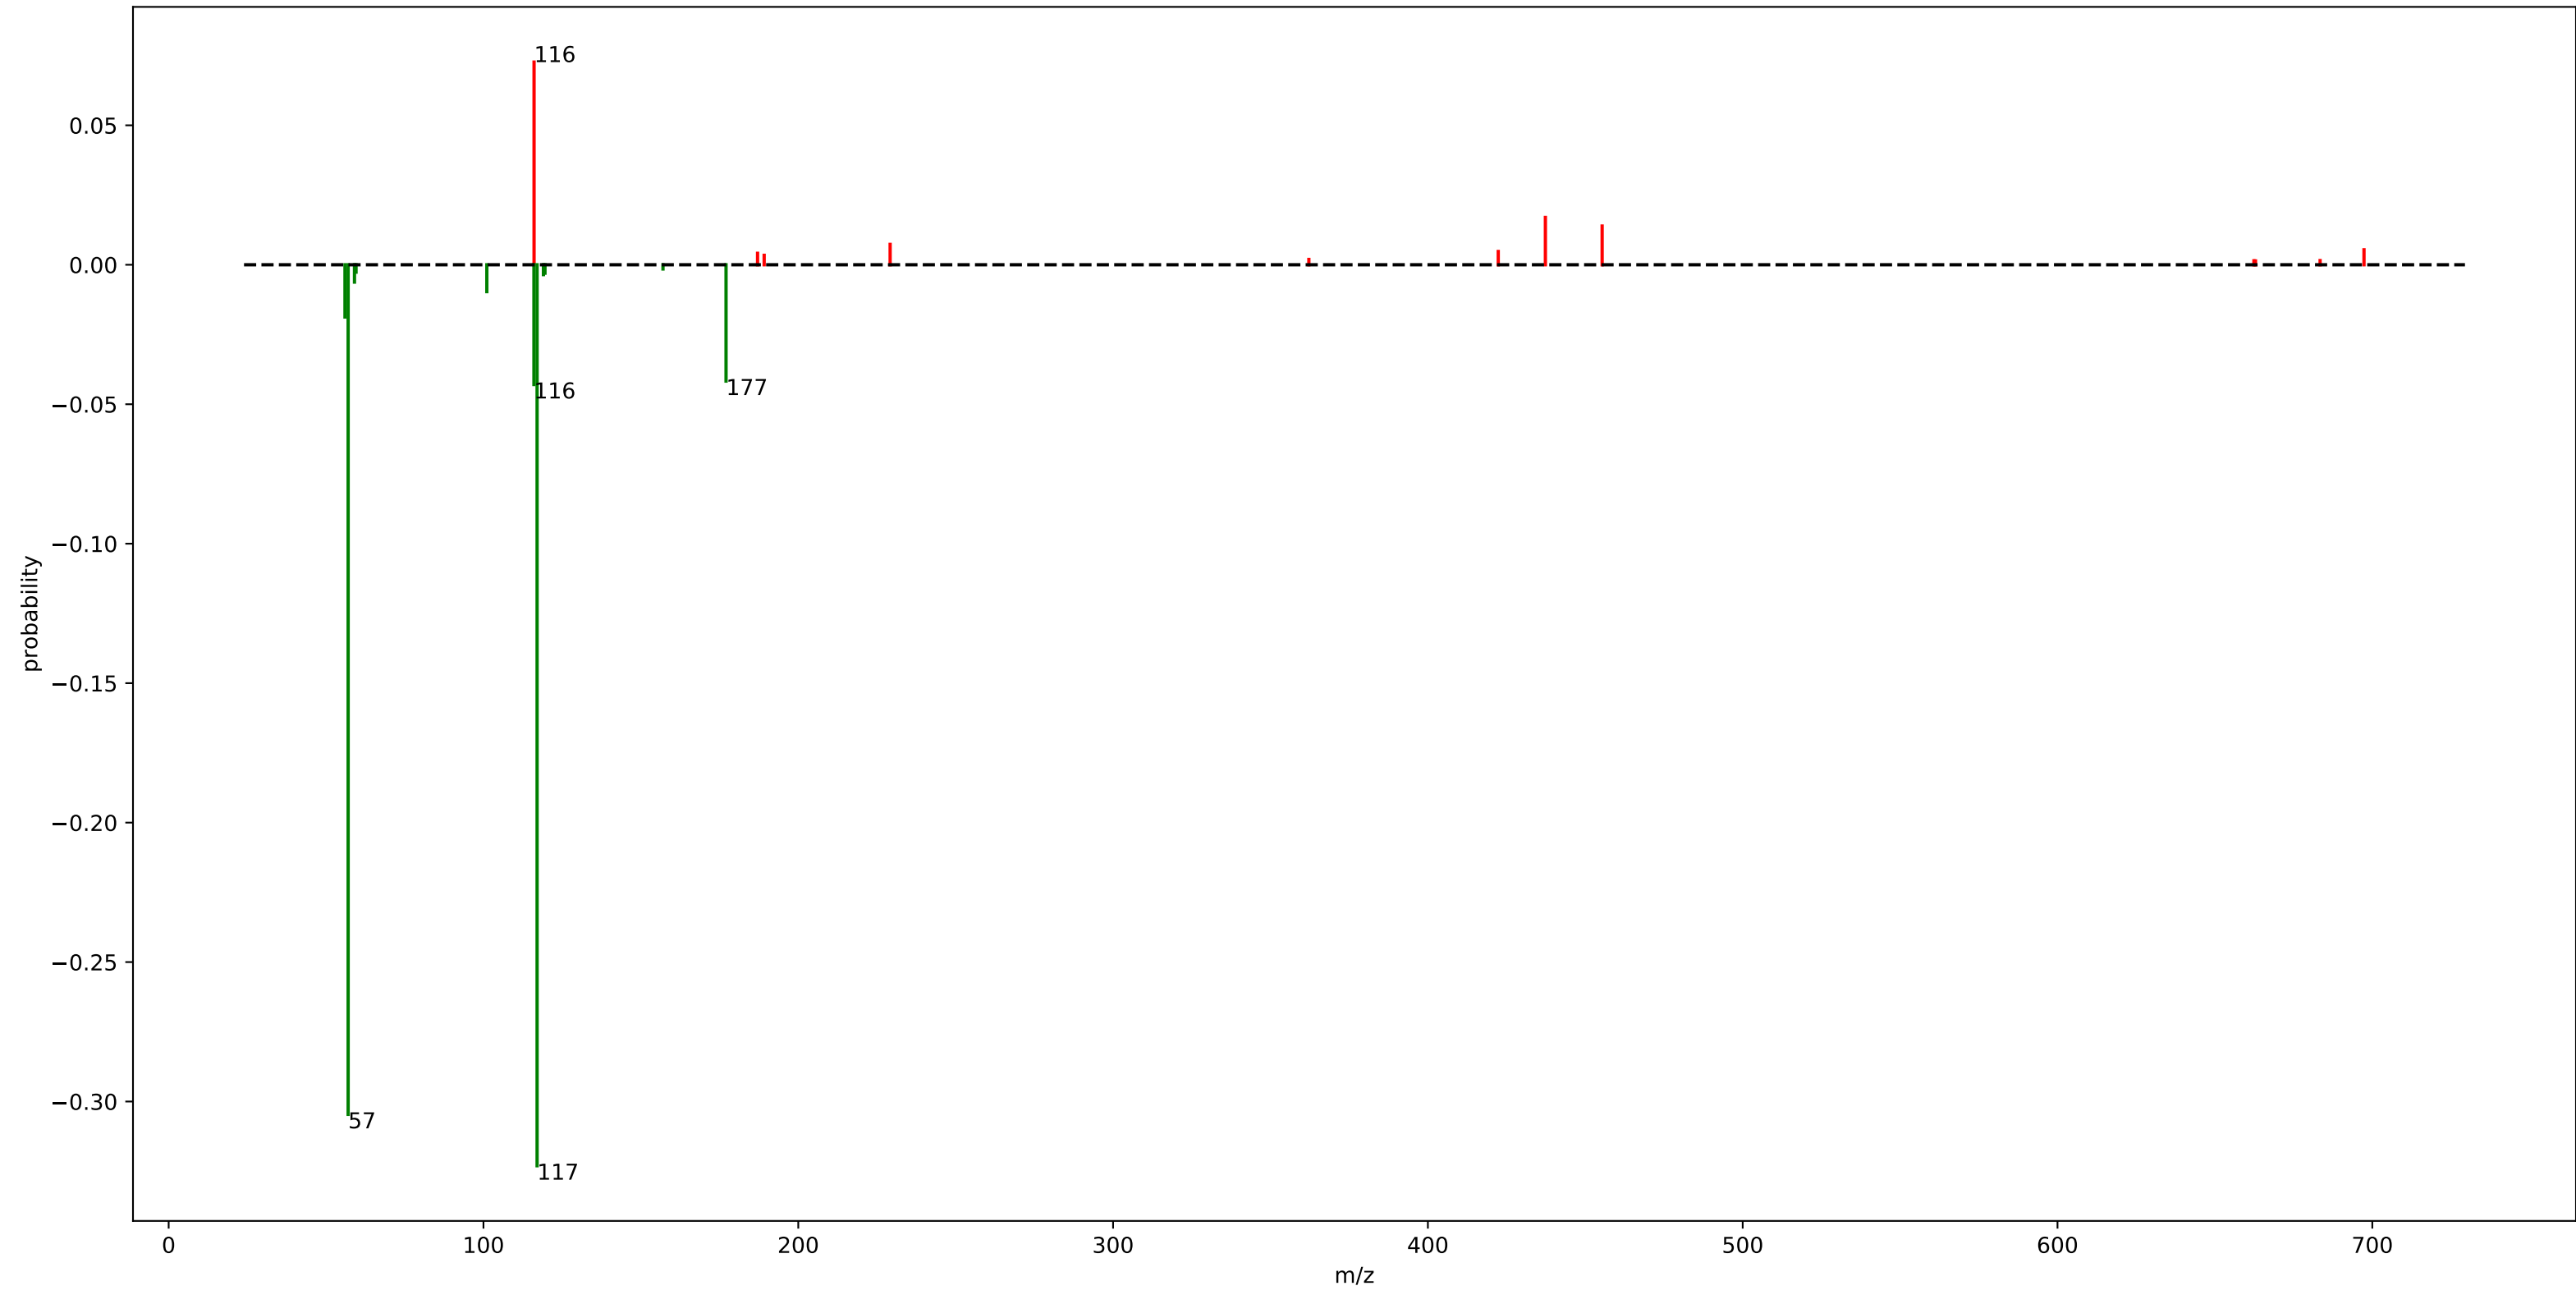

## motif\_516

|                   |        |
|-------------------|--------|
| loss_117.0325     | : 0.32 |
| loss_57.0125      | : 0.30 |
| fragment_116.0675 | : 0.07 |
| loss_116.0275     | : 0.04 |
| loss_177.0525     | : 0.04 |
| loss_56.0075      | : 0.02 |
| fragment_437.3225 | : 0.02 |
| fragment_455.3525 | : 0.01 |
| loss_101.0675     | : 0.01 |
| fragment_229.1775 | : 0.01 |
| loss_59.0225      | : 0.01 |
| fragment_697.3625 | : 0.01 |

motif\_515

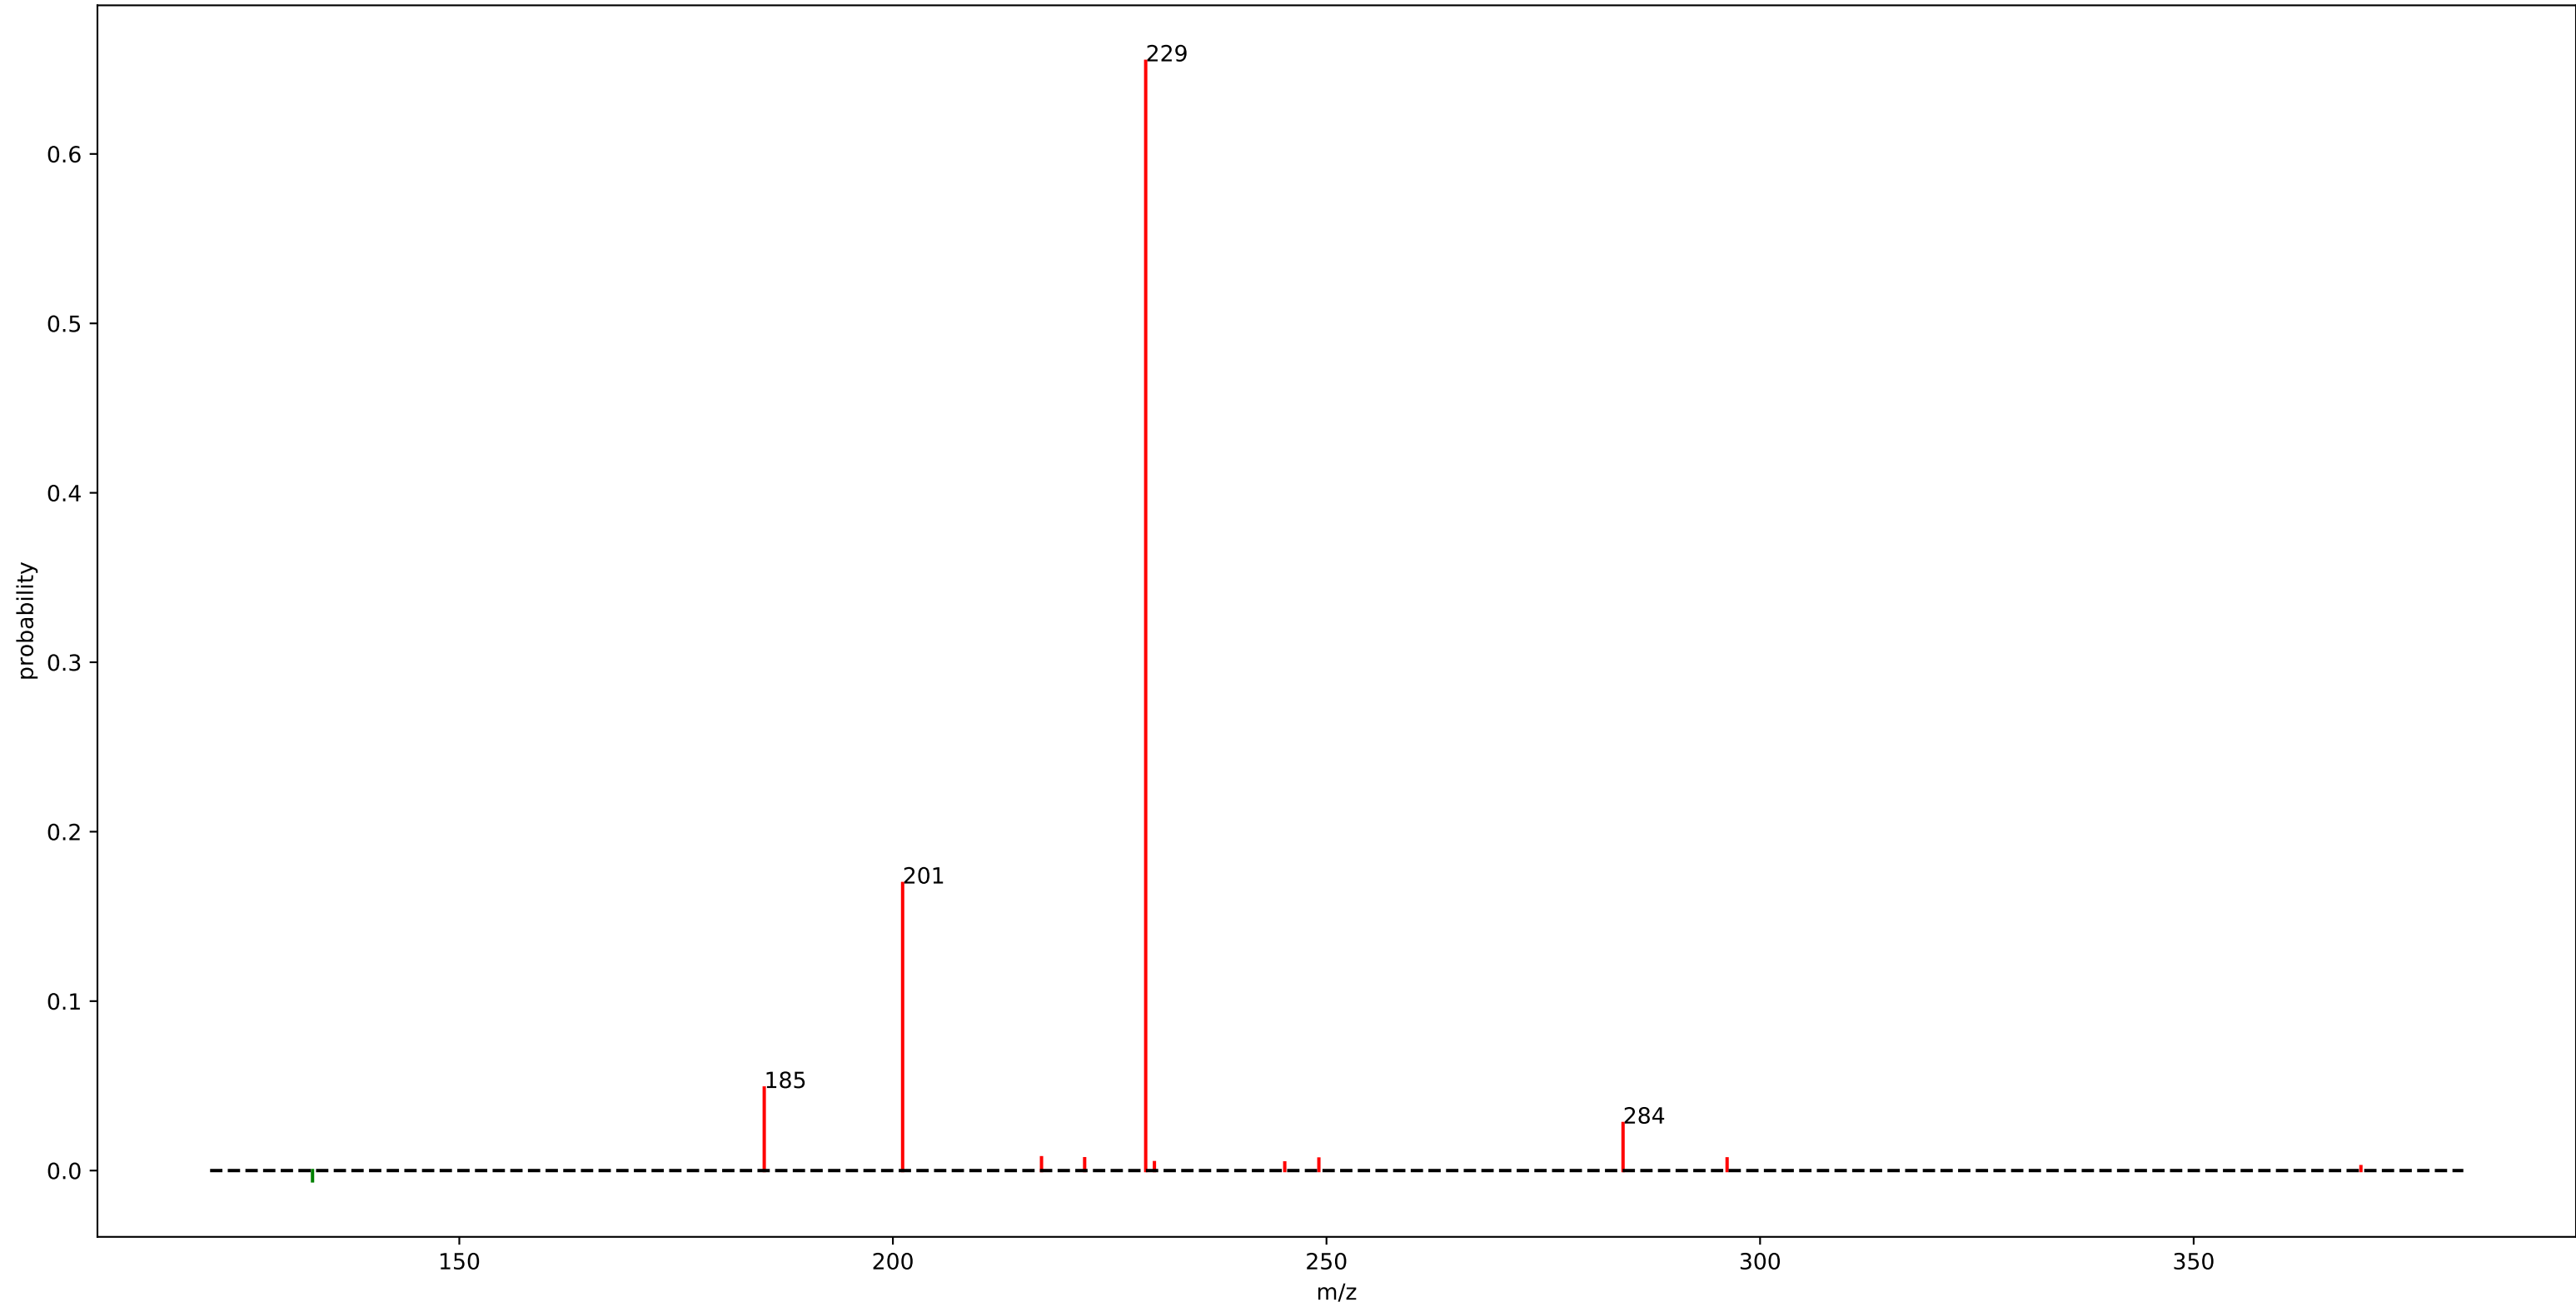

## motif\_515

|                   |        |
|-------------------|--------|
| fragment_229.1525 | : 0.65 |
| fragment_201.1225 | : 0.17 |
| fragment_185.1625 | : 0.05 |
| fragment_284.1975 | : 0.03 |
| fragment_217.1375 | : 0.01 |
| fragment_222.1125 | : 0.01 |
| fragment_296.1975 | : 0.01 |
| fragment_249.1225 | : 0.01 |
| loss_133.0725     | : 0.01 |



motif\_514

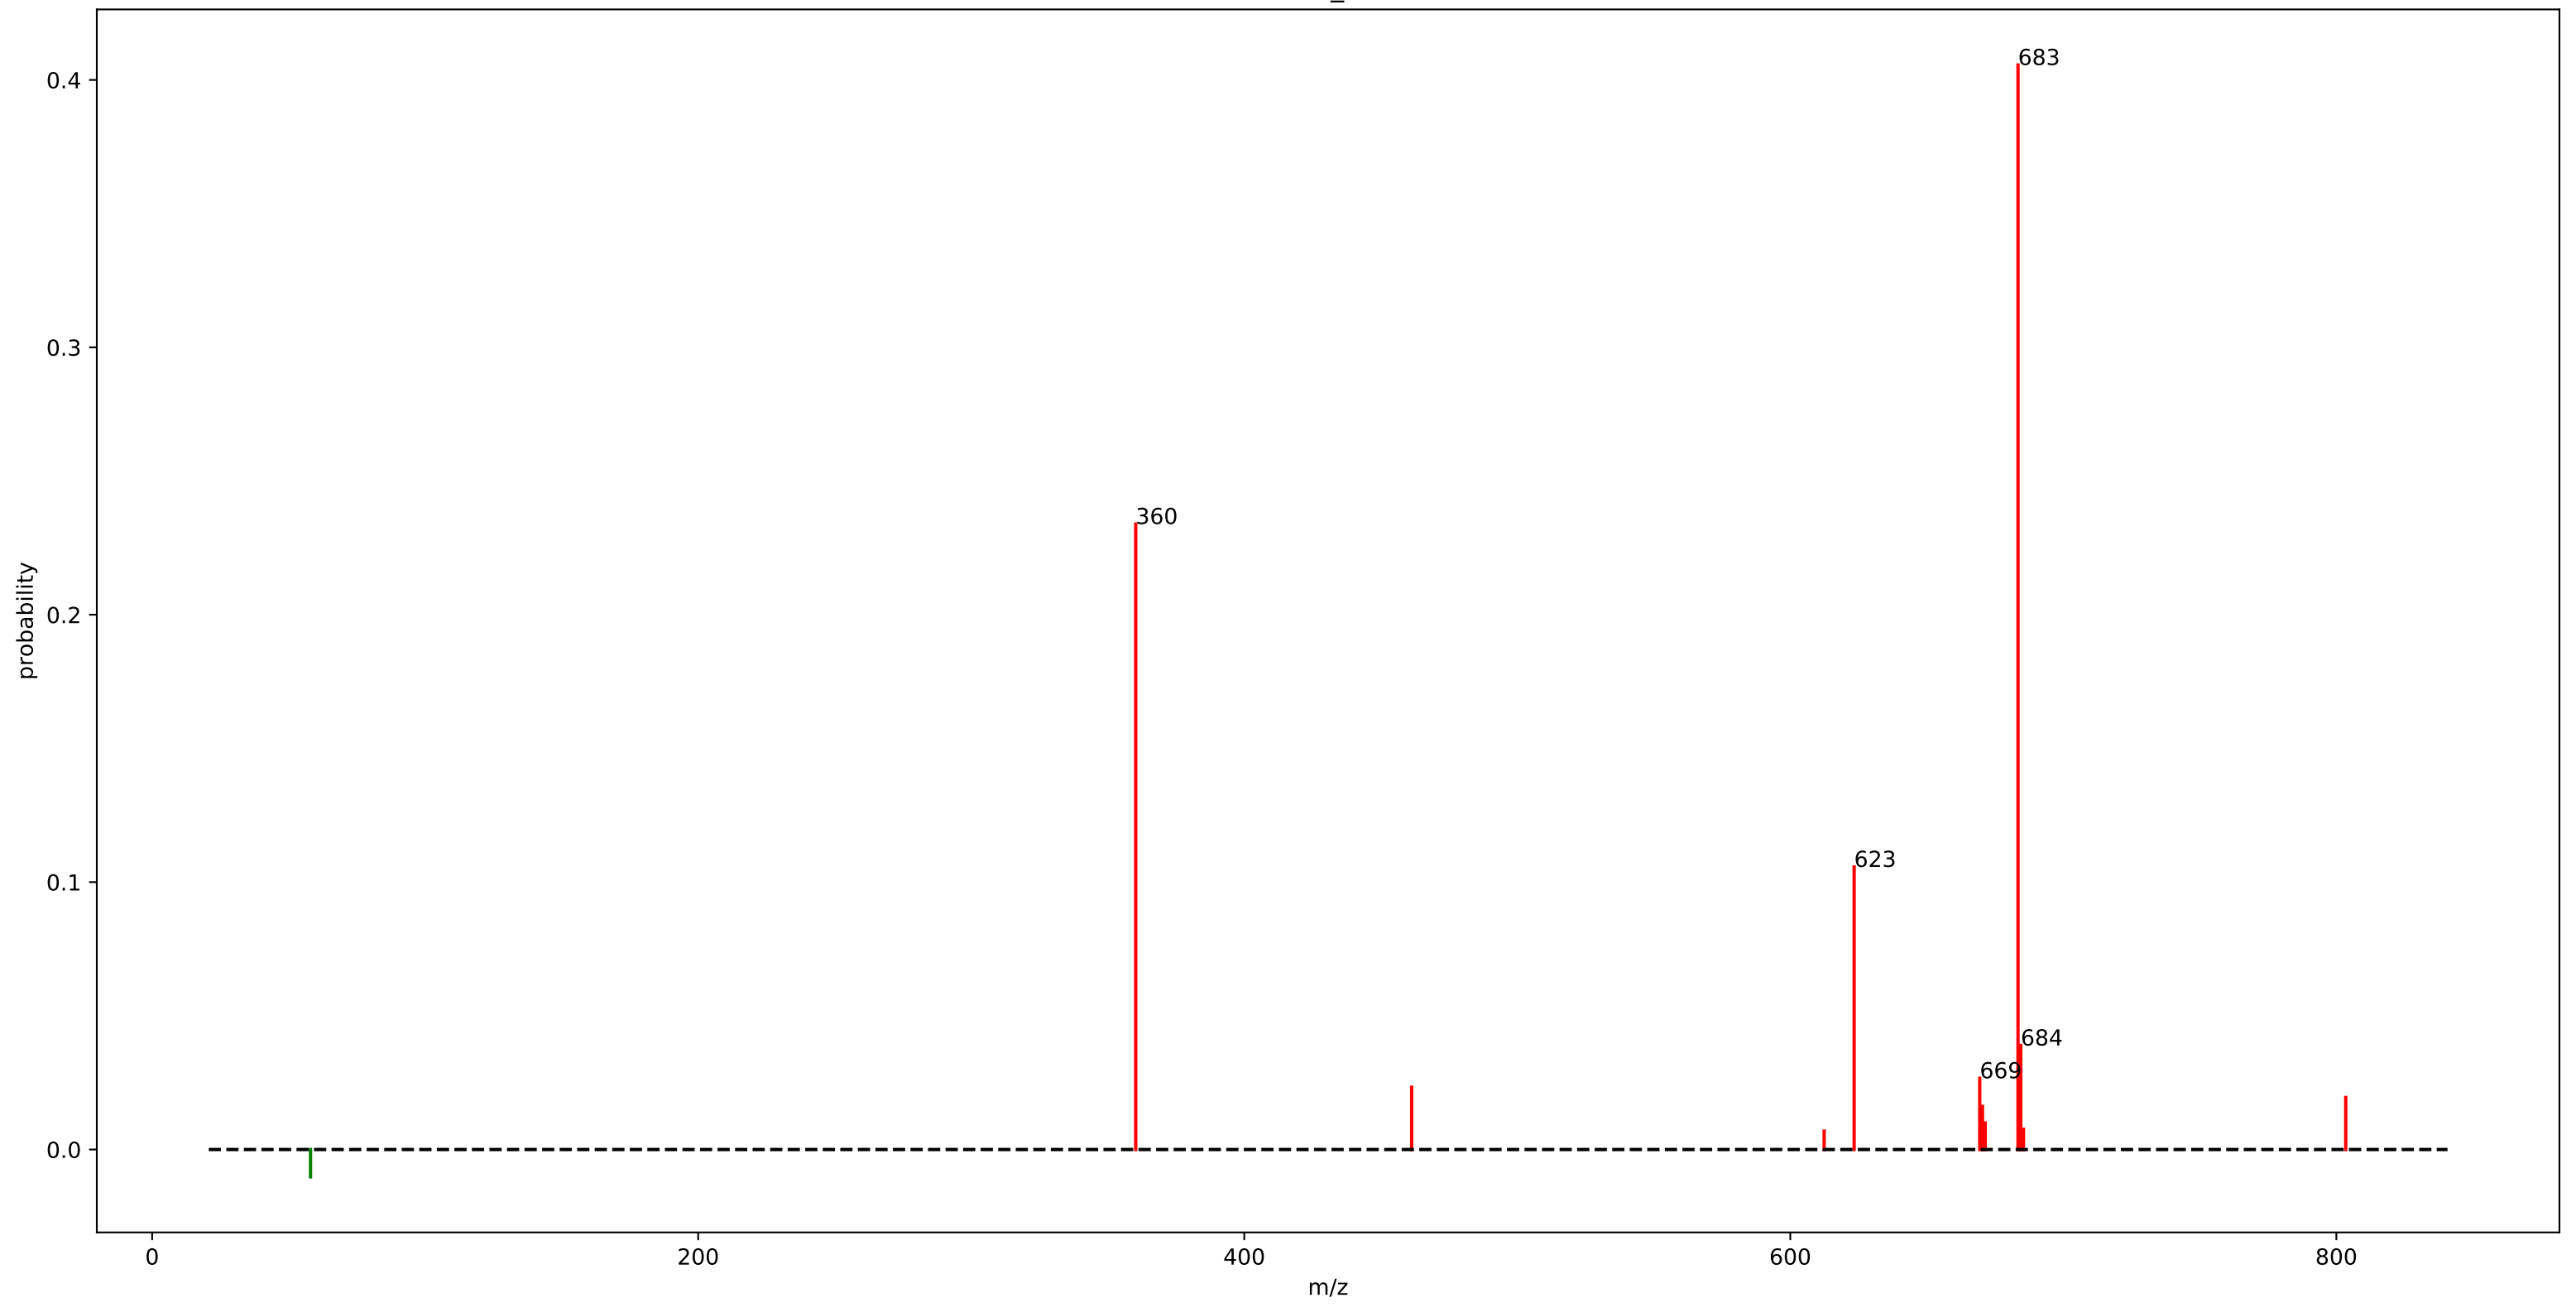

## motif\_514

|                   |        |
|-------------------|--------|
| fragment_683.4025 | : 0.41 |
| fragment_360.2525 | : 0.23 |
| fragment_623.3775 | : 0.11 |
| fragment_684.4025 | : 0.04 |
| fragment_669.3875 | : 0.03 |
| fragment_461.3275 | : 0.02 |
| fragment_803.4425 | : 0.02 |
| fragment_670.3875 | : 0.02 |
| loss_58.0075      | : 0.01 |
| fragment_671.3975 | : 0.01 |
| fragment_685.4025 | : 0.01 |
| fragment_612.3925 | : 0.01 |

motif\_513

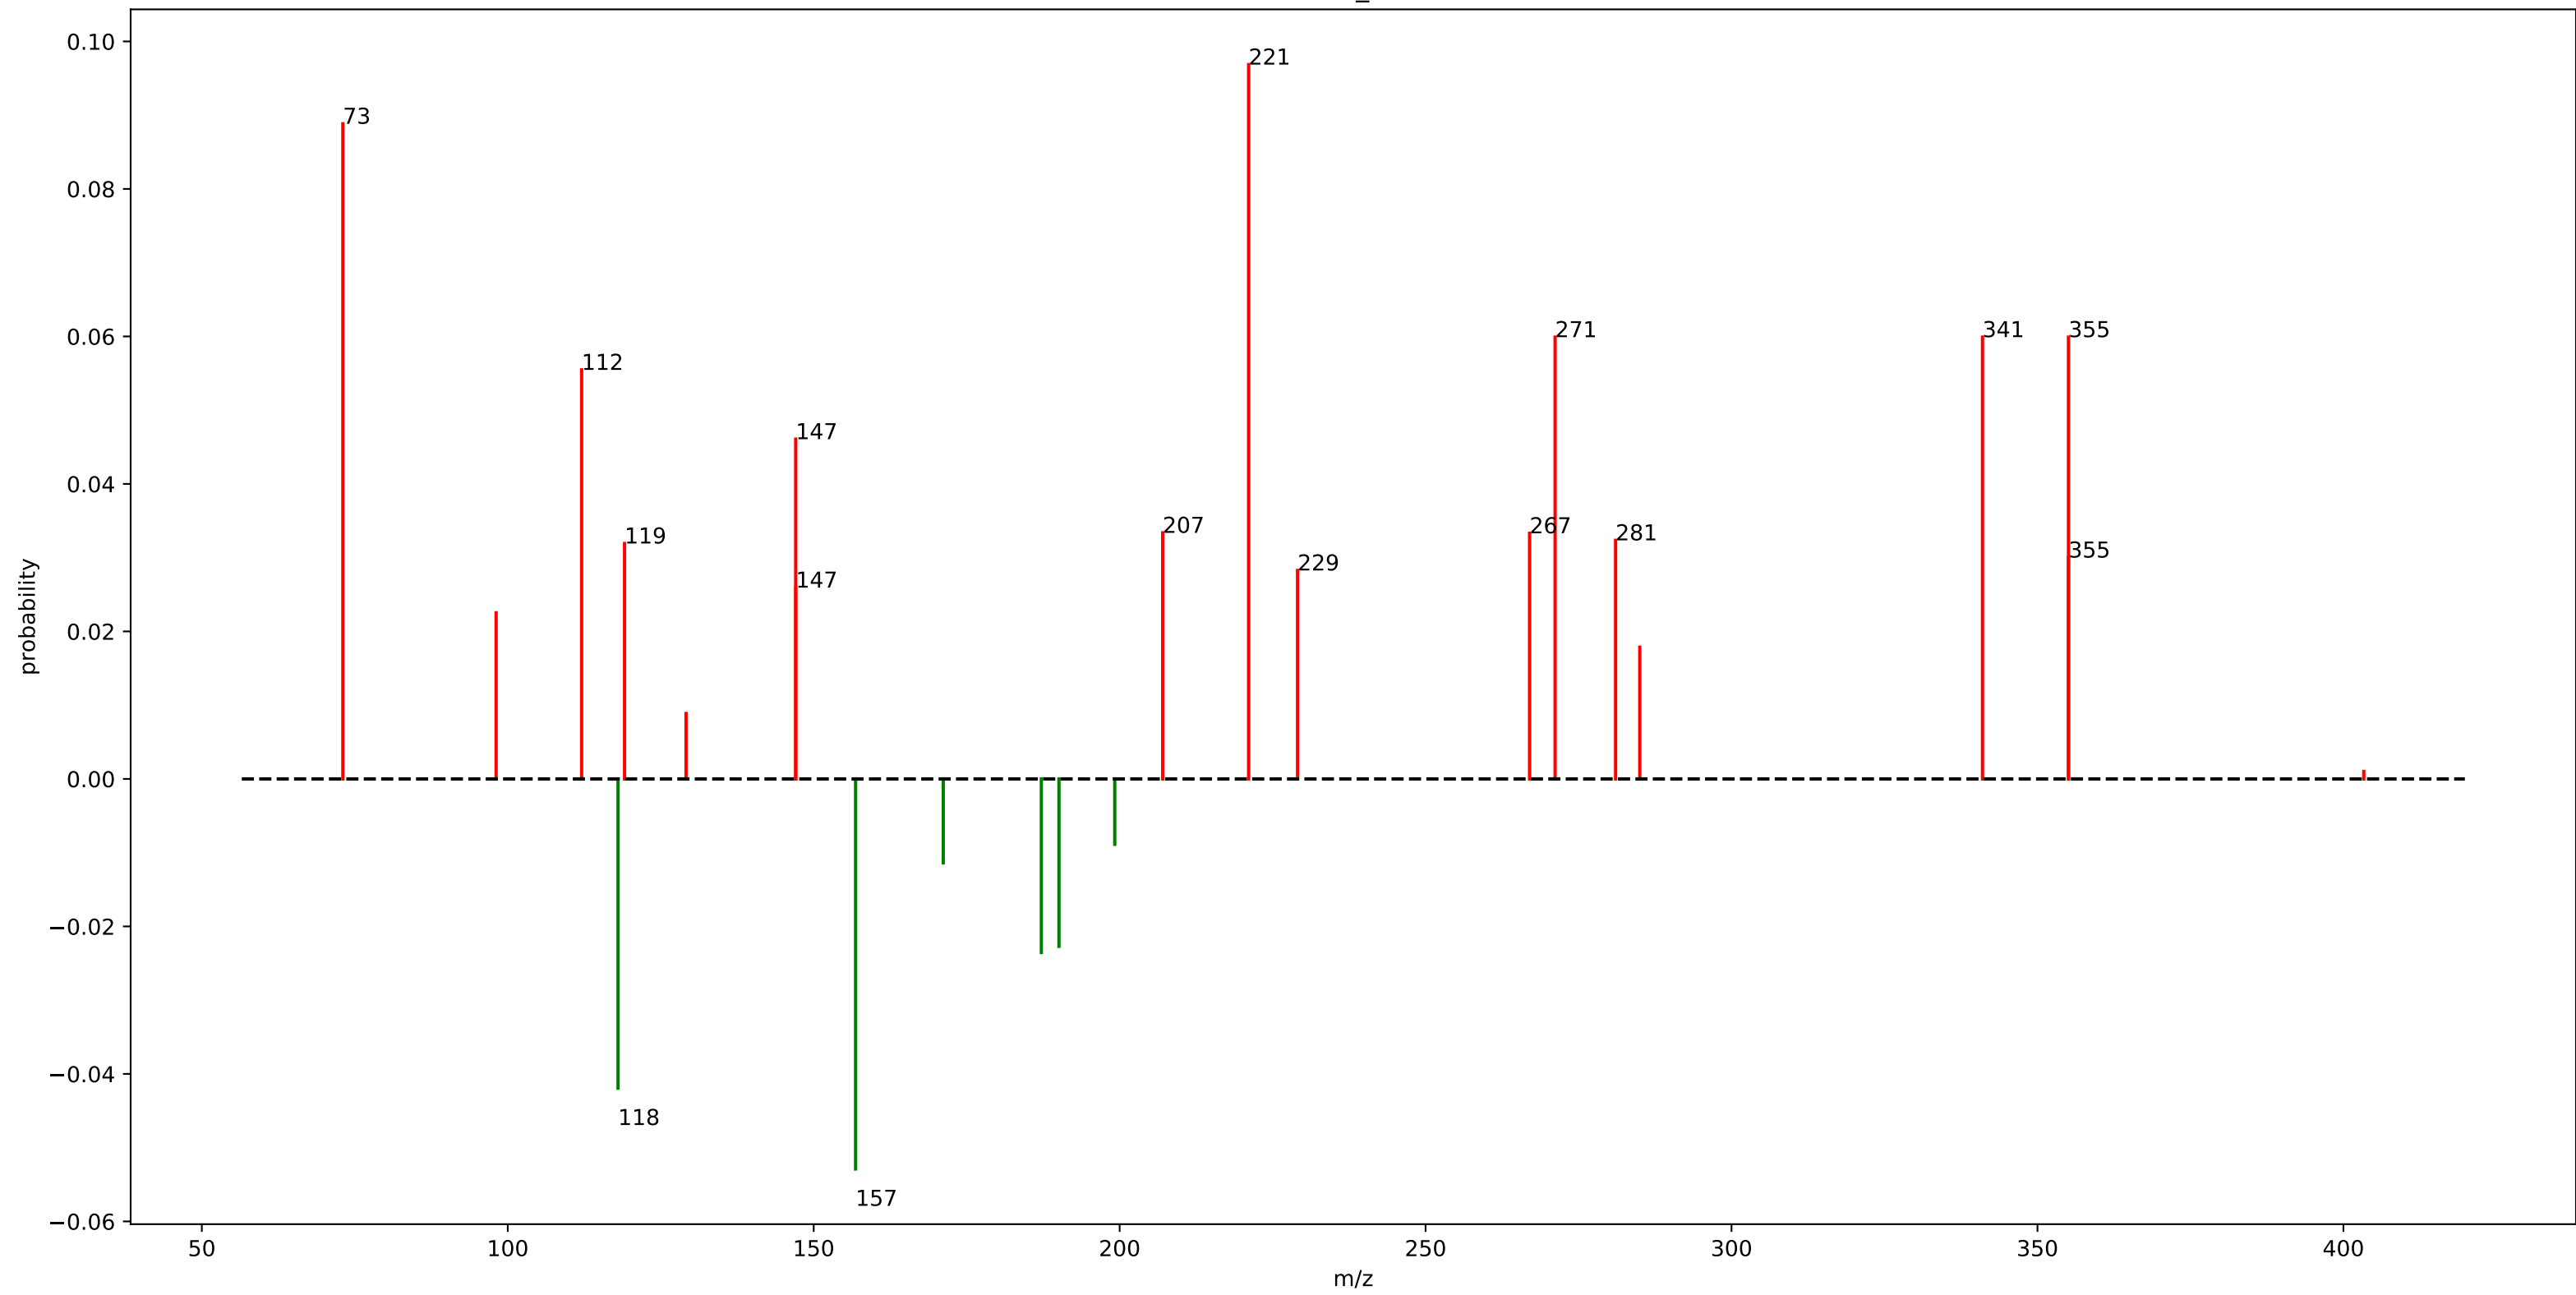

## motif\_513

|                   |        |                   |        |
|-------------------|--------|-------------------|--------|
| fragment_221.0825 | : 0.10 | loss_171.1725     | : 0.01 |
| fragment_73.0475  | : 0.09 | loss_199.2025     | : 0.01 |
| fragment_355.0675 | : 0.06 | fragment_129.1375 | : 0.01 |
| fragment_341.0175 | : 0.06 |                   |        |
| fragment_271.1675 | : 0.06 |                   |        |
| fragment_112.0725 | : 0.06 |                   |        |
| loss_156.8425     | : 0.05 |                   |        |
| fragment_147.0625 | : 0.05 |                   |        |
| loss_118.0225     | : 0.04 |                   |        |
| fragment_207.0325 | : 0.03 |                   |        |
| fragment_266.9975 | : 0.03 |                   |        |
| fragment_281.0525 | : 0.03 |                   |        |
| fragment_119.0875 | : 0.03 |                   |        |
| fragment_355.0725 | : 0.03 |                   |        |
| fragment_229.0775 | : 0.03 |                   |        |
| fragment_147.0675 | : 0.03 |                   |        |
| loss_187.2025     | : 0.02 |                   |        |
| loss_190.0825     | : 0.02 |                   |        |
| fragment_98.0975  | : 0.02 |                   |        |
| fragment_285.0075 | : 0.02 |                   |        |

motif\_512

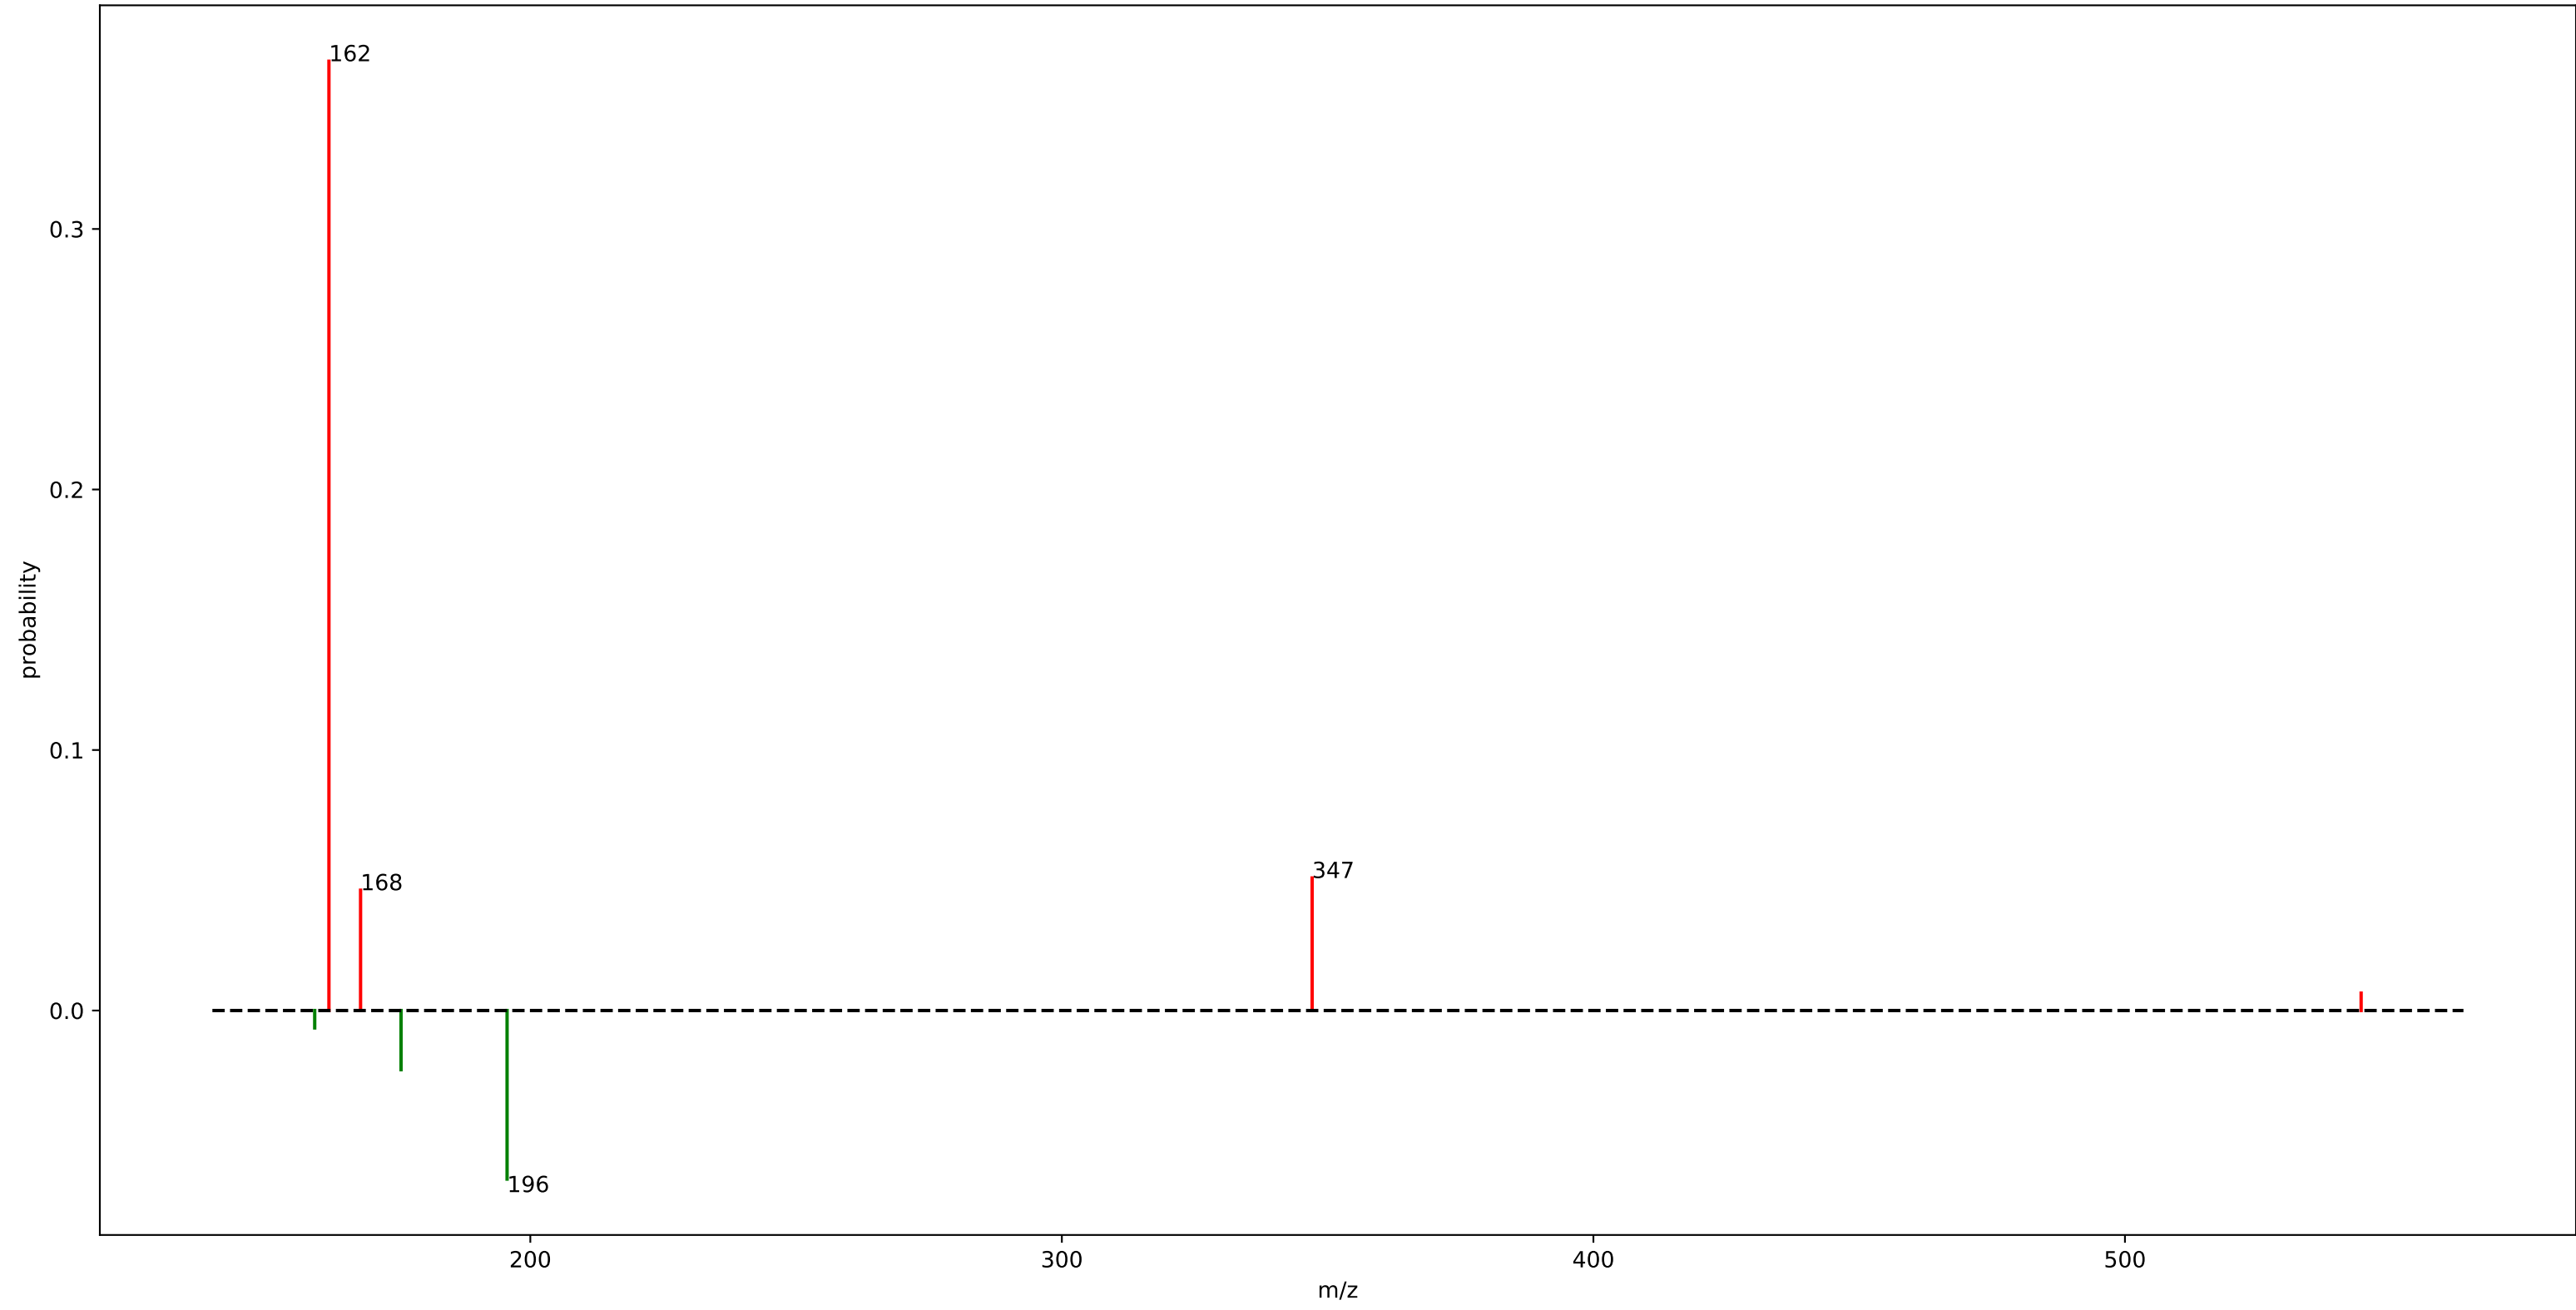

## motif\_512

|                   |        |
|-------------------|--------|
| fragment_162.1125 | : 0.36 |
| loss_195.6275     | : 0.06 |
| fragment_347.0825 | : 0.05 |
| fragment_168.0625 | : 0.05 |
| loss_175.6775     | : 0.02 |
| fragment_544.4325 | : 0.01 |
| loss_159.4375     | : 0.01 |

euphorbia\_motif\_362.m2m

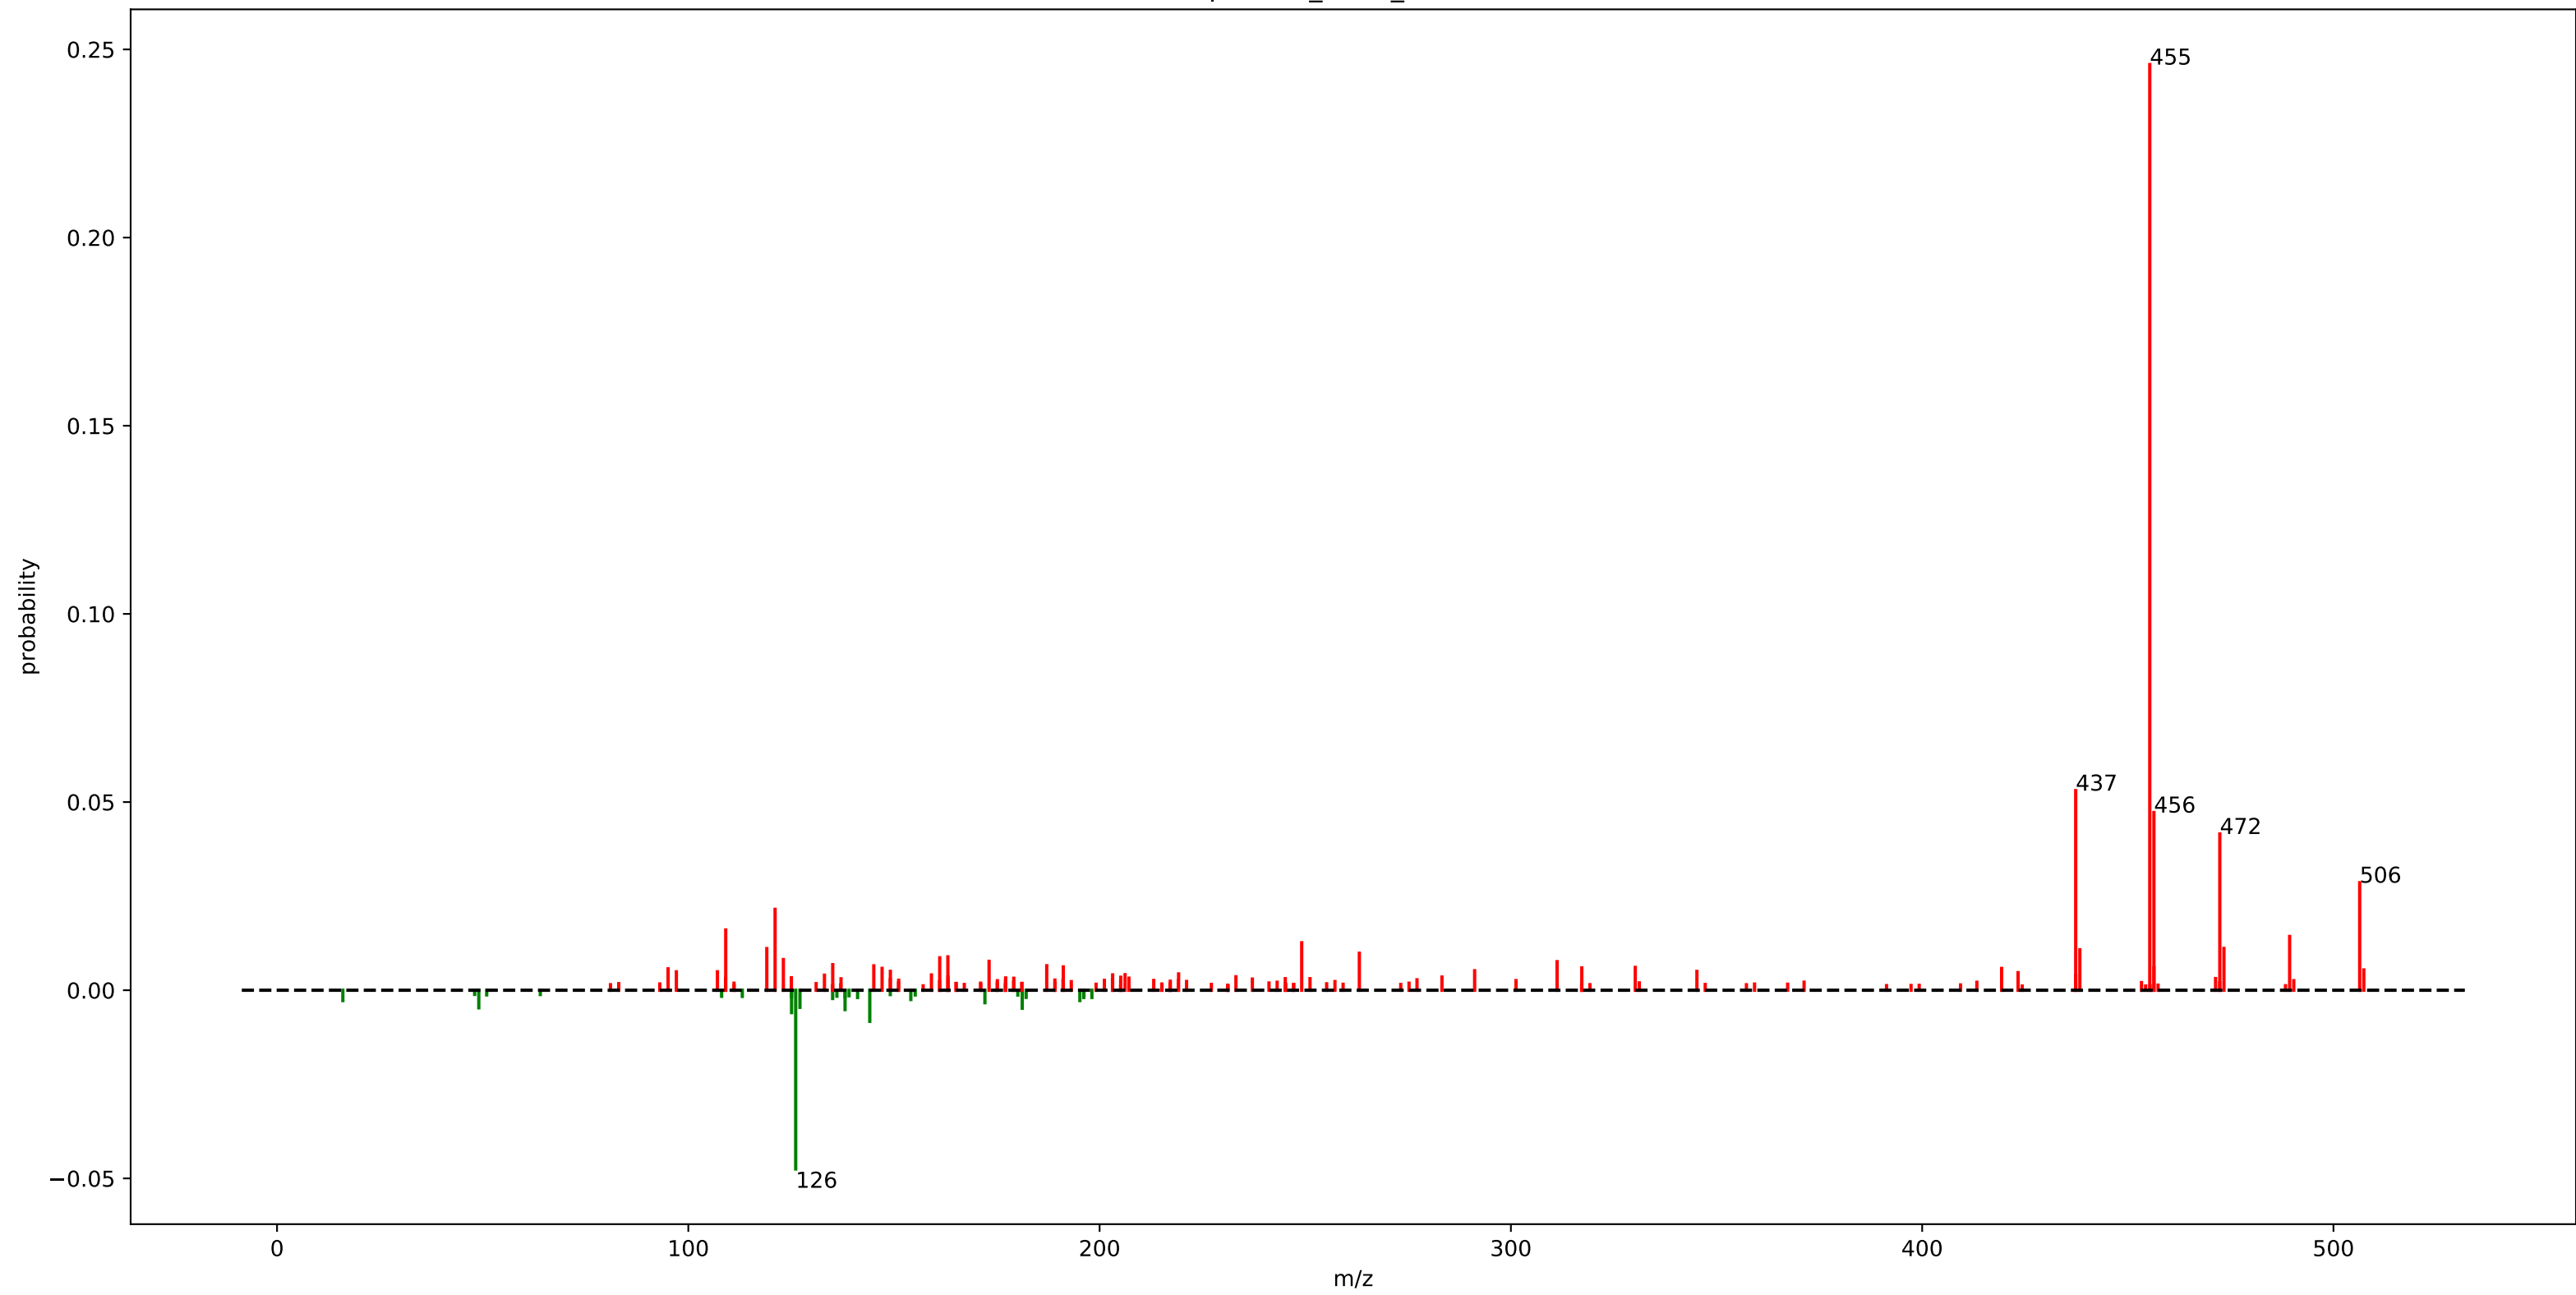

# euphorbia\_motif\_362.m2m

|                   |        |                   |        |
|-------------------|--------|-------------------|--------|
| fragment_455.3425 | : 0.25 | fragment_135.1125 | : 0.01 |
| fragment_437.3325 | : 0.05 | fragment_187.1475 | : 0.01 |
| loss_126.1075     | : 0.05 | fragment_145.0975 | : 0.01 |
| fragment_456.3475 | : 0.05 | fragment_191.1725 | : 0.01 |
| fragment_472.3675 | : 0.04 | fragment_330.2425 | : 0.01 |
| fragment_506.3775 | : 0.03 | fragment_456.3525 | : 0.01 |
| fragment_121.0975 | : 0.02 | loss_125.1075     | : 0.01 |
| fragment_109.0975 | : 0.02 | fragment_317.2425 | : 0.01 |
| fragment_489.3475 | : 0.01 | fragment_147.1125 | : 0.01 |
| fragment_249.1425 | : 0.01 | fragment_419.3225 | : 0.01 |
| fragment_473.3725 | : 0.01 | fragment_95.0825  | : 0.01 |
| fragment_119.0825 | : 0.01 | fragment_507.3775 | : 0.01 |
| fragment_438.3375 | : 0.01 | fragment_291.1875 | : 0.01 |
| fragment_263.1575 | : 0.01 | loss_138.1075     | : 0.01 |
| fragment_163.1075 | : 0.01 | fragment_149.1275 | : 0.01 |
| fragment_161.1275 | : 0.01 |                   |        |
| loss_144.1175     | : 0.01 |                   |        |
| fragment_123.1125 | : 0.01 |                   |        |
| fragment_173.1275 | : 0.01 |                   |        |
| fragment_311.2325 | : 0.01 |                   |        |



gnps\_motif\_70.m2m

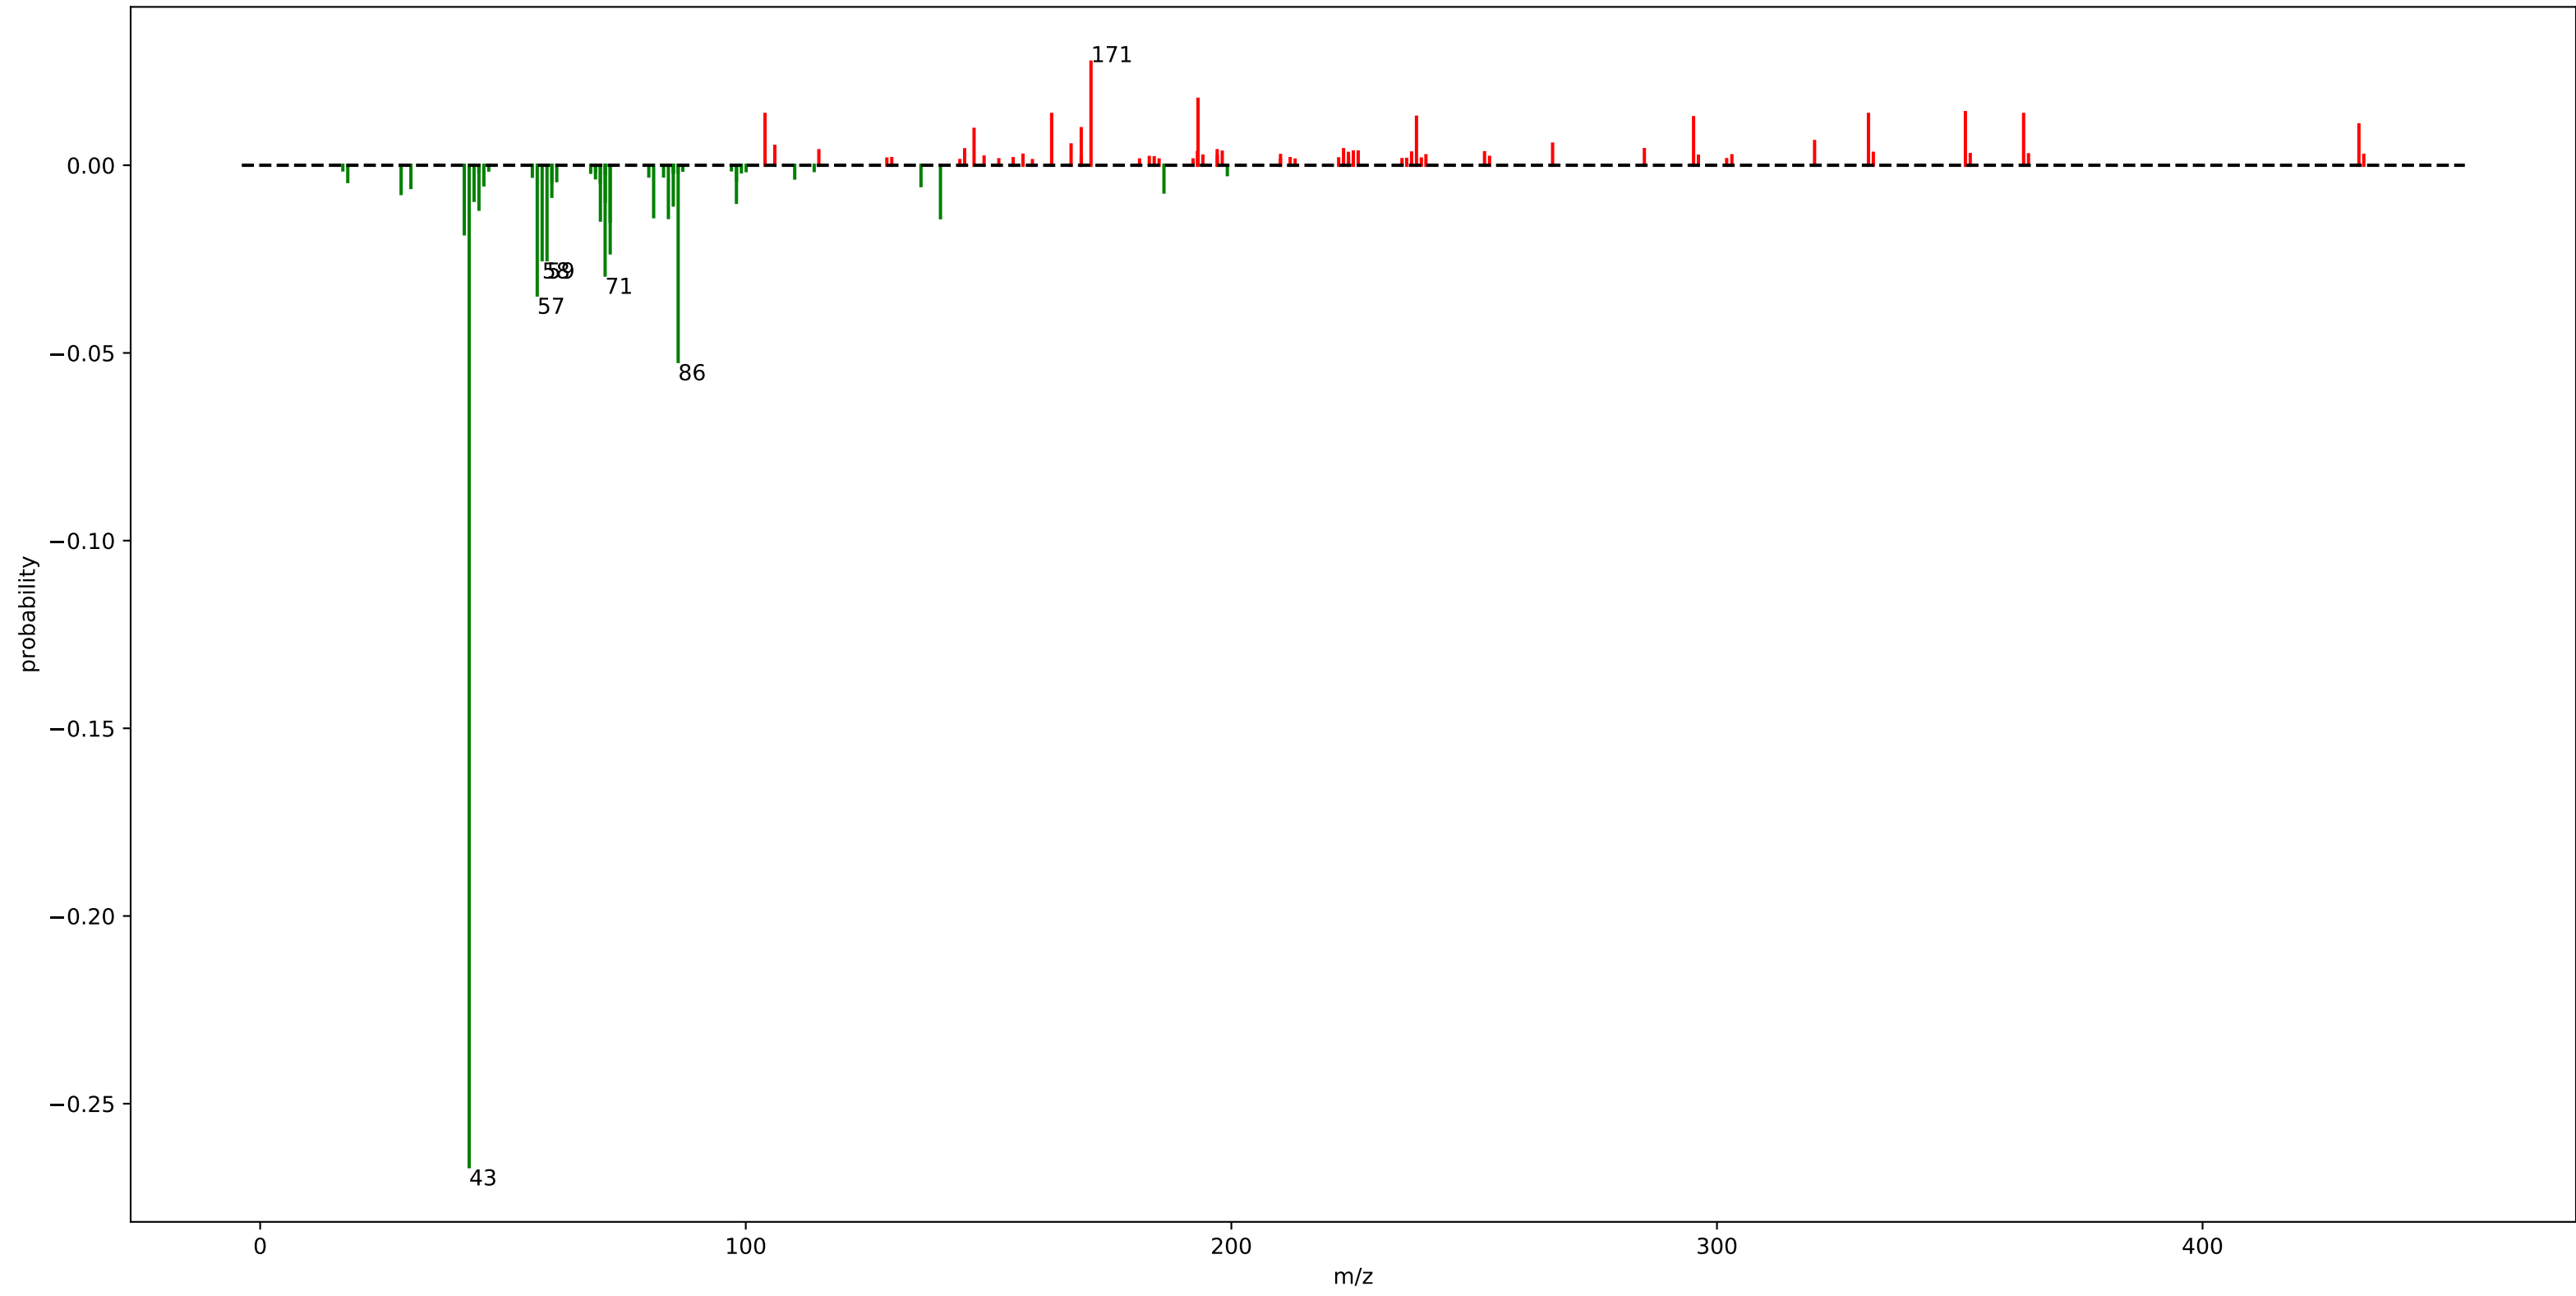

# gnps\_motif\_70.m2m

|                   |        |                   |        |
|-------------------|--------|-------------------|--------|
| loss_43.0425      | : 0.27 | fragment_238.1225 | : 0.01 |
| loss_86.0825      | : 0.05 | fragment_295.1825 | : 0.01 |
| loss_57.0575      | : 0.03 | loss_45.0575      | : 0.01 |
| loss_71.0375      | : 0.03 | fragment_432.1975 | : 0.01 |
| fragment_171.0925 | : 0.03 | loss_85.0775      | : 0.01 |
| loss_59.0725      | : 0.03 | loss_98.0825      | : 0.01 |
| loss_58.0675      | : 0.03 | fragment_169.0875 | : 0.01 |
| loss_72.0825      | : 0.02 | fragment_147.0125 | : 0.01 |
| loss_42.0375      | : 0.02 | loss_71.0725      | : 0.01 |
| fragment_193.1325 | : 0.02 | loss_44.0525      | : 0.01 |
| loss_72.0675      | : 0.01 | loss_60.0675      | : 0.01 |
| loss_70.0675      | : 0.01 | loss_29.0275      | : 0.01 |
| fragment_351.1625 | : 0.01 | loss_186.1175     | : 0.01 |
| loss_140.0975     | : 0.01 | fragment_320.1025 | : 0.01 |
| loss_84.0675      | : 0.01 | loss_31.0425      | : 0.01 |
| loss_81.0325      | : 0.01 | fragment_266.1525 | : 0.01 |
| fragment_331.1975 | : 0.01 | fragment_166.9975 | : 0.01 |
| fragment_103.9675 | : 0.01 | loss_136.0875     | : 0.01 |
| fragment_162.9925 | : 0.01 | loss_46.0675      | : 0.01 |
| fragment_363.1475 | : 0.01 | fragment_105.9825 | : 0.01 |

rhabdus\_motif\_250.m2m

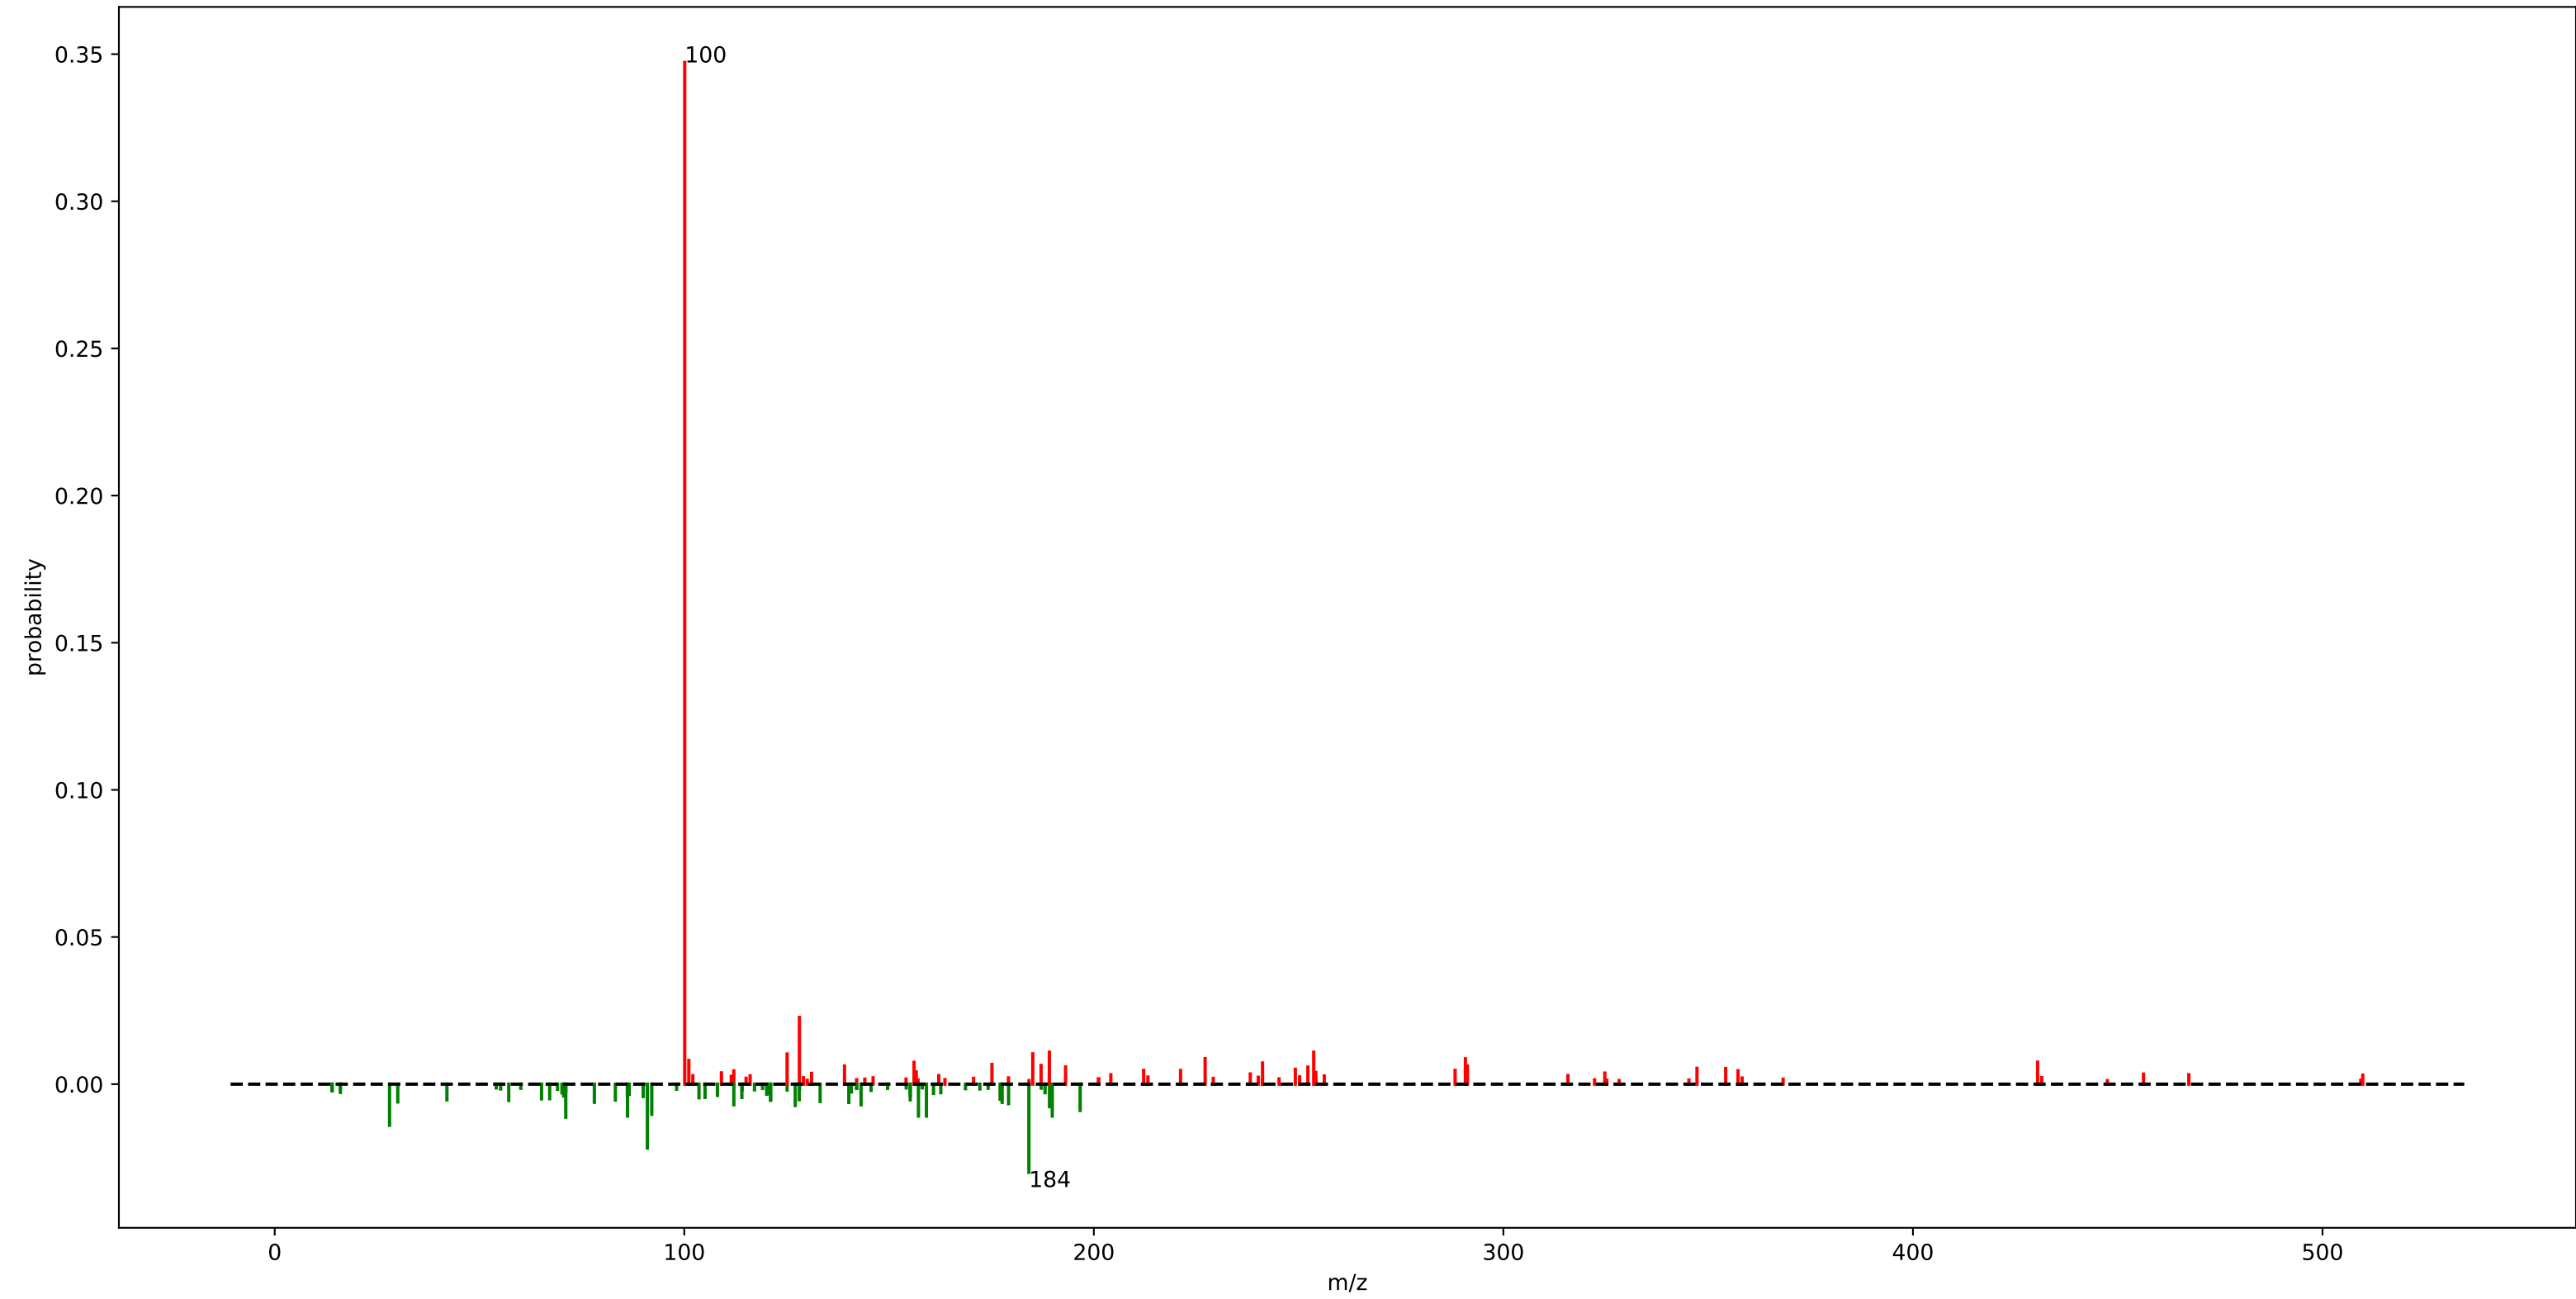

# rhabdus\_motif\_250.m2m

|                   |        |                   |        |                   |        |
|-------------------|--------|-------------------|--------|-------------------|--------|
| fragment_100.1125 | : 0.35 | fragment_430.4375 | : 0.01 | loss_83.1725      | : 0.01 |
| loss_184.1475     | : 0.03 | fragment_156.1025 | : 0.01 | fragment_347.2675 | : 0.01 |
| fragment_128.1075 | : 0.02 | loss_127.0975     | : 0.01 | loss_42.0475      | : 0.01 |
| loss_90.9825      | : 0.02 | fragment_241.1925 | : 0.01 | loss_155.1675     | : 0.01 |
| loss_28.0325      | : 0.01 | loss_143.1675     | : 0.01 | fragment_354.2725 | : 0.01 |
| loss_71.0675      | : 0.01 | loss_112.1025     | : 0.01 | loss_128.0775     | : 0.01 |
| fragment_253.6925 | : 0.01 | fragment_175.1225 | : 0.01 | loss_121.0875     | : 0.01 |
| fragment_189.1375 | : 0.01 | loss_179.1875     | : 0.01 | loss_177.1125     | : 0.01 |
| loss_189.8525     | : 0.01 | fragment_187.1225 | : 0.01 | fragment_249.1975 | : 0.01 |
| loss_157.1825     | : 0.01 | loss_140.1775     | : 0.01 | loss_65.1525      | : 0.01 |
| loss_159.1225     | : 0.01 | loss_177.6125     | : 0.01 |                   |        |
| loss_86.1375      | : 0.01 | fragment_291.2275 | : 0.01 |                   |        |
| fragment_185.0925 | : 0.01 | fragment_139.1225 | : 0.01 |                   |        |
| fragment_125.1075 | : 0.01 | loss_78.0475      | : 0.01 |                   |        |
| loss_92.0625      | : 0.01 | loss_30.0475      | : 0.01 |                   |        |
| loss_196.6575     | : 0.01 | loss_133.1725     | : 0.01 |                   |        |
| fragment_227.1725 | : 0.01 | fragment_193.1025 | : 0.01 |                   |        |
| fragment_290.7275 | : 0.01 | fragment_252.2575 | : 0.01 |                   |        |
| fragment_101.1125 | : 0.01 | loss_57.1375      | : 0.01 |                   |        |
| loss_189.1725     | : 0.01 | loss_121.0675     | : 0.01 |                   |        |

motif\_458

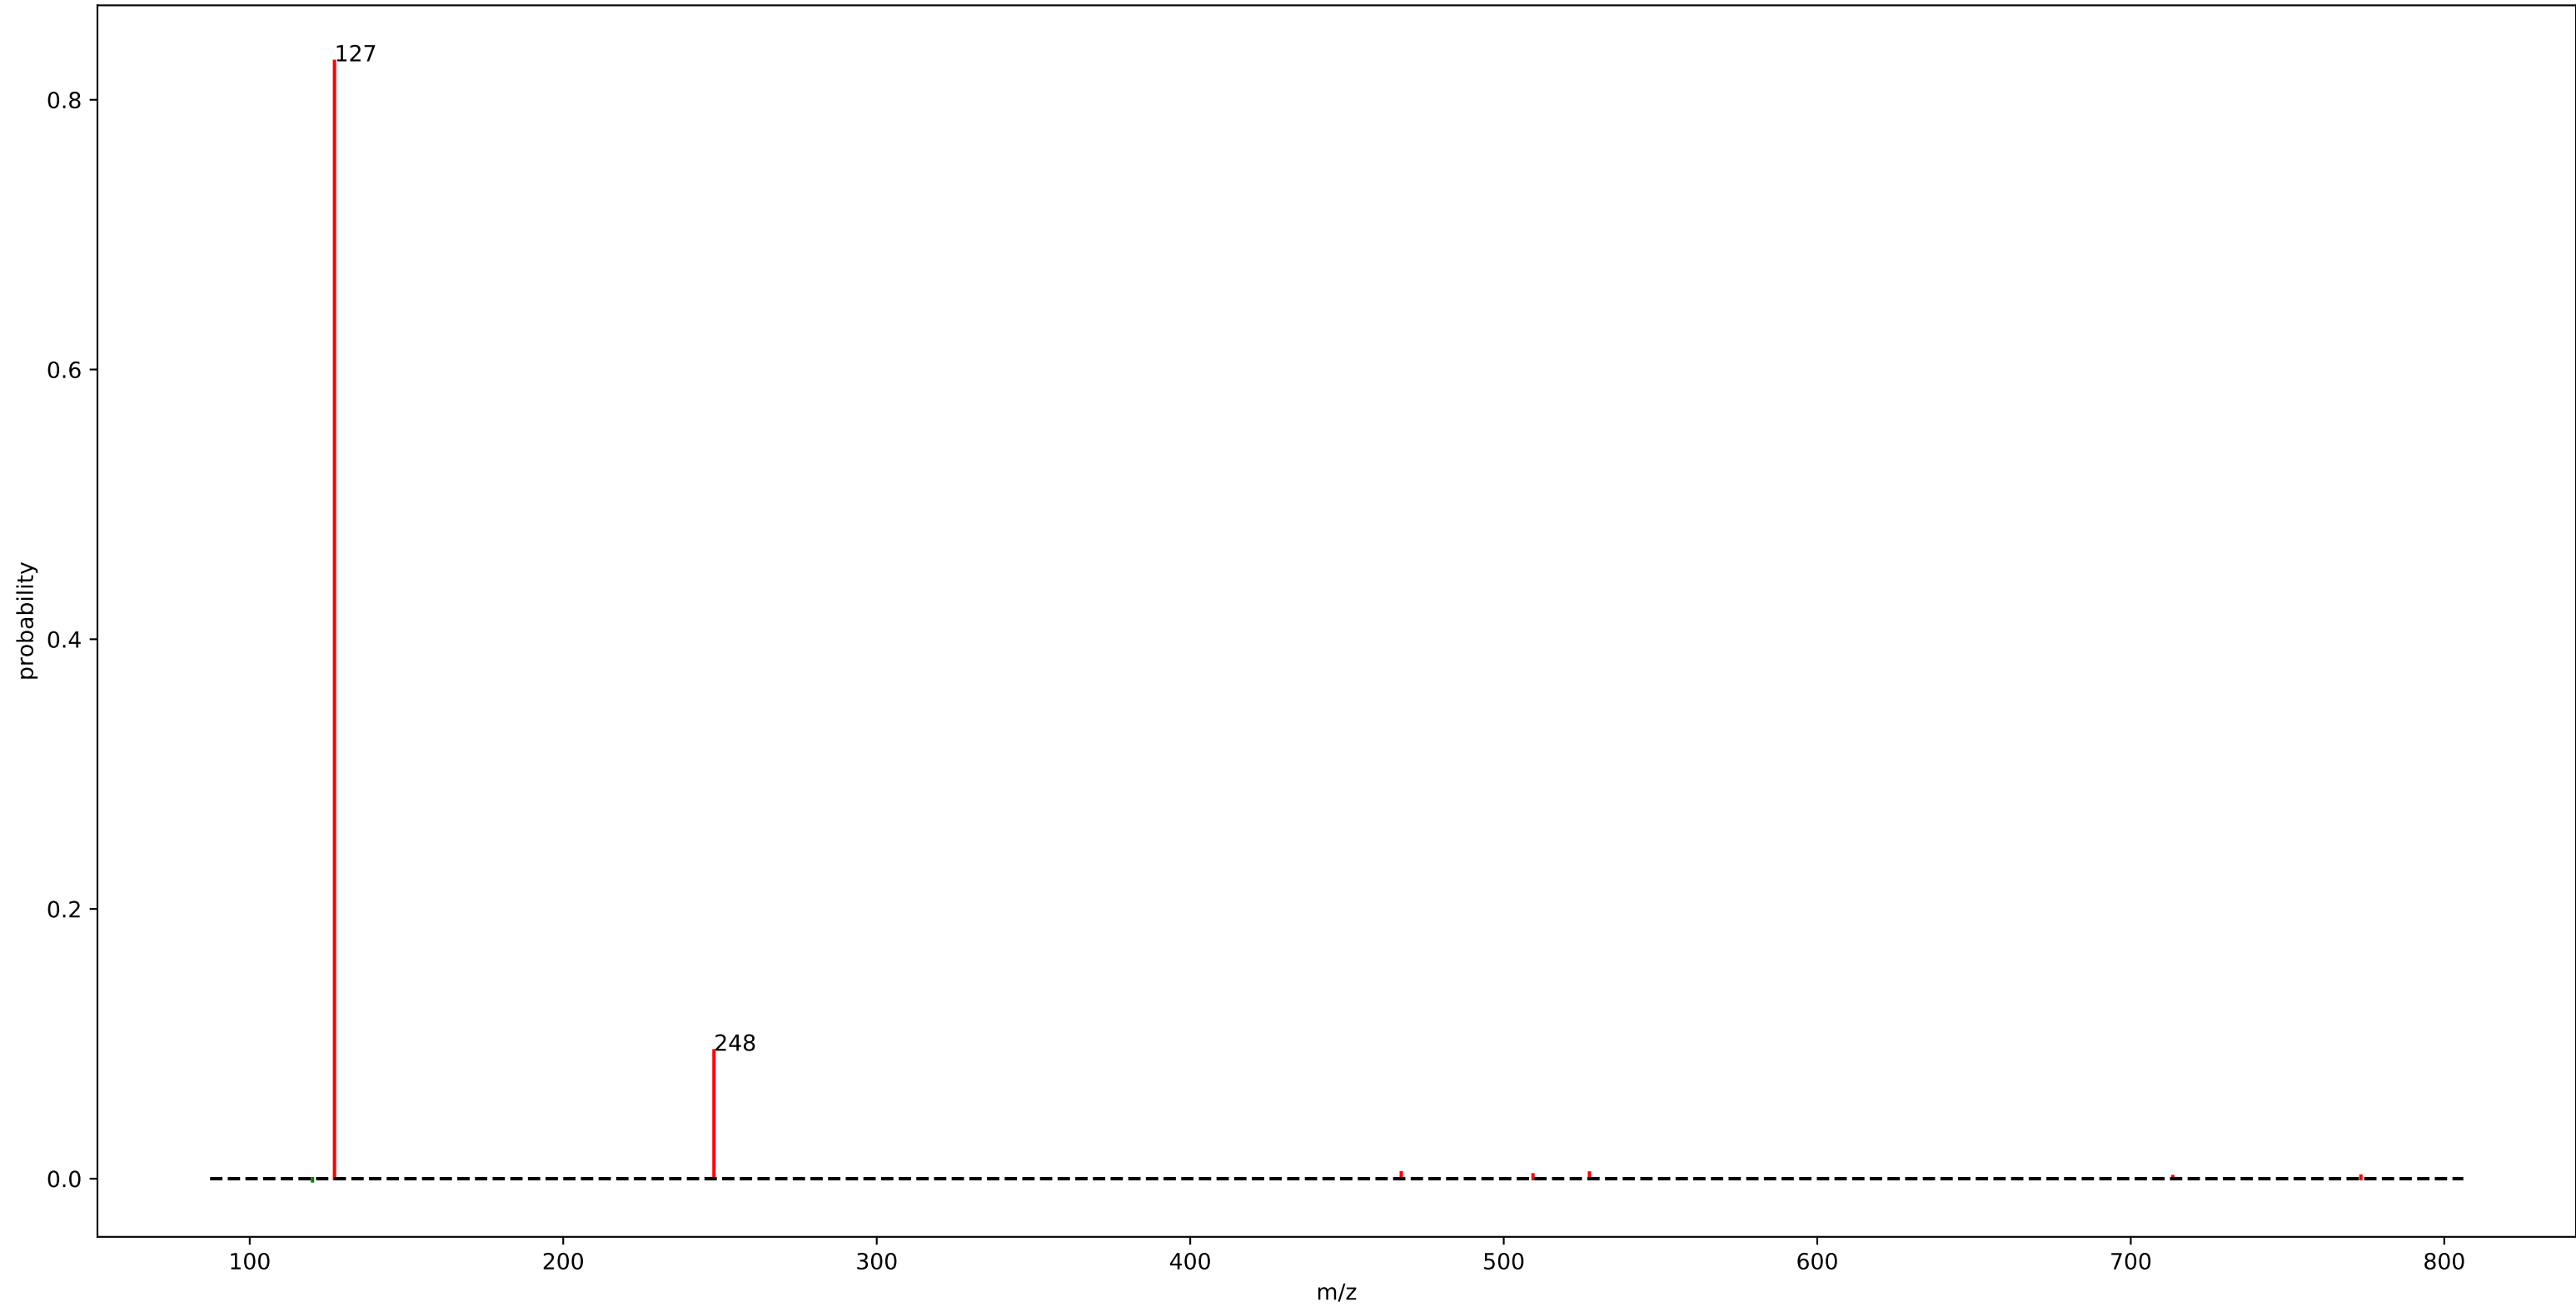

## motif\_458

fragment\_127.0375 : 0.83  
fragment\_248.0825 : 0.09

StrepSalini\_motif\_223.m2m

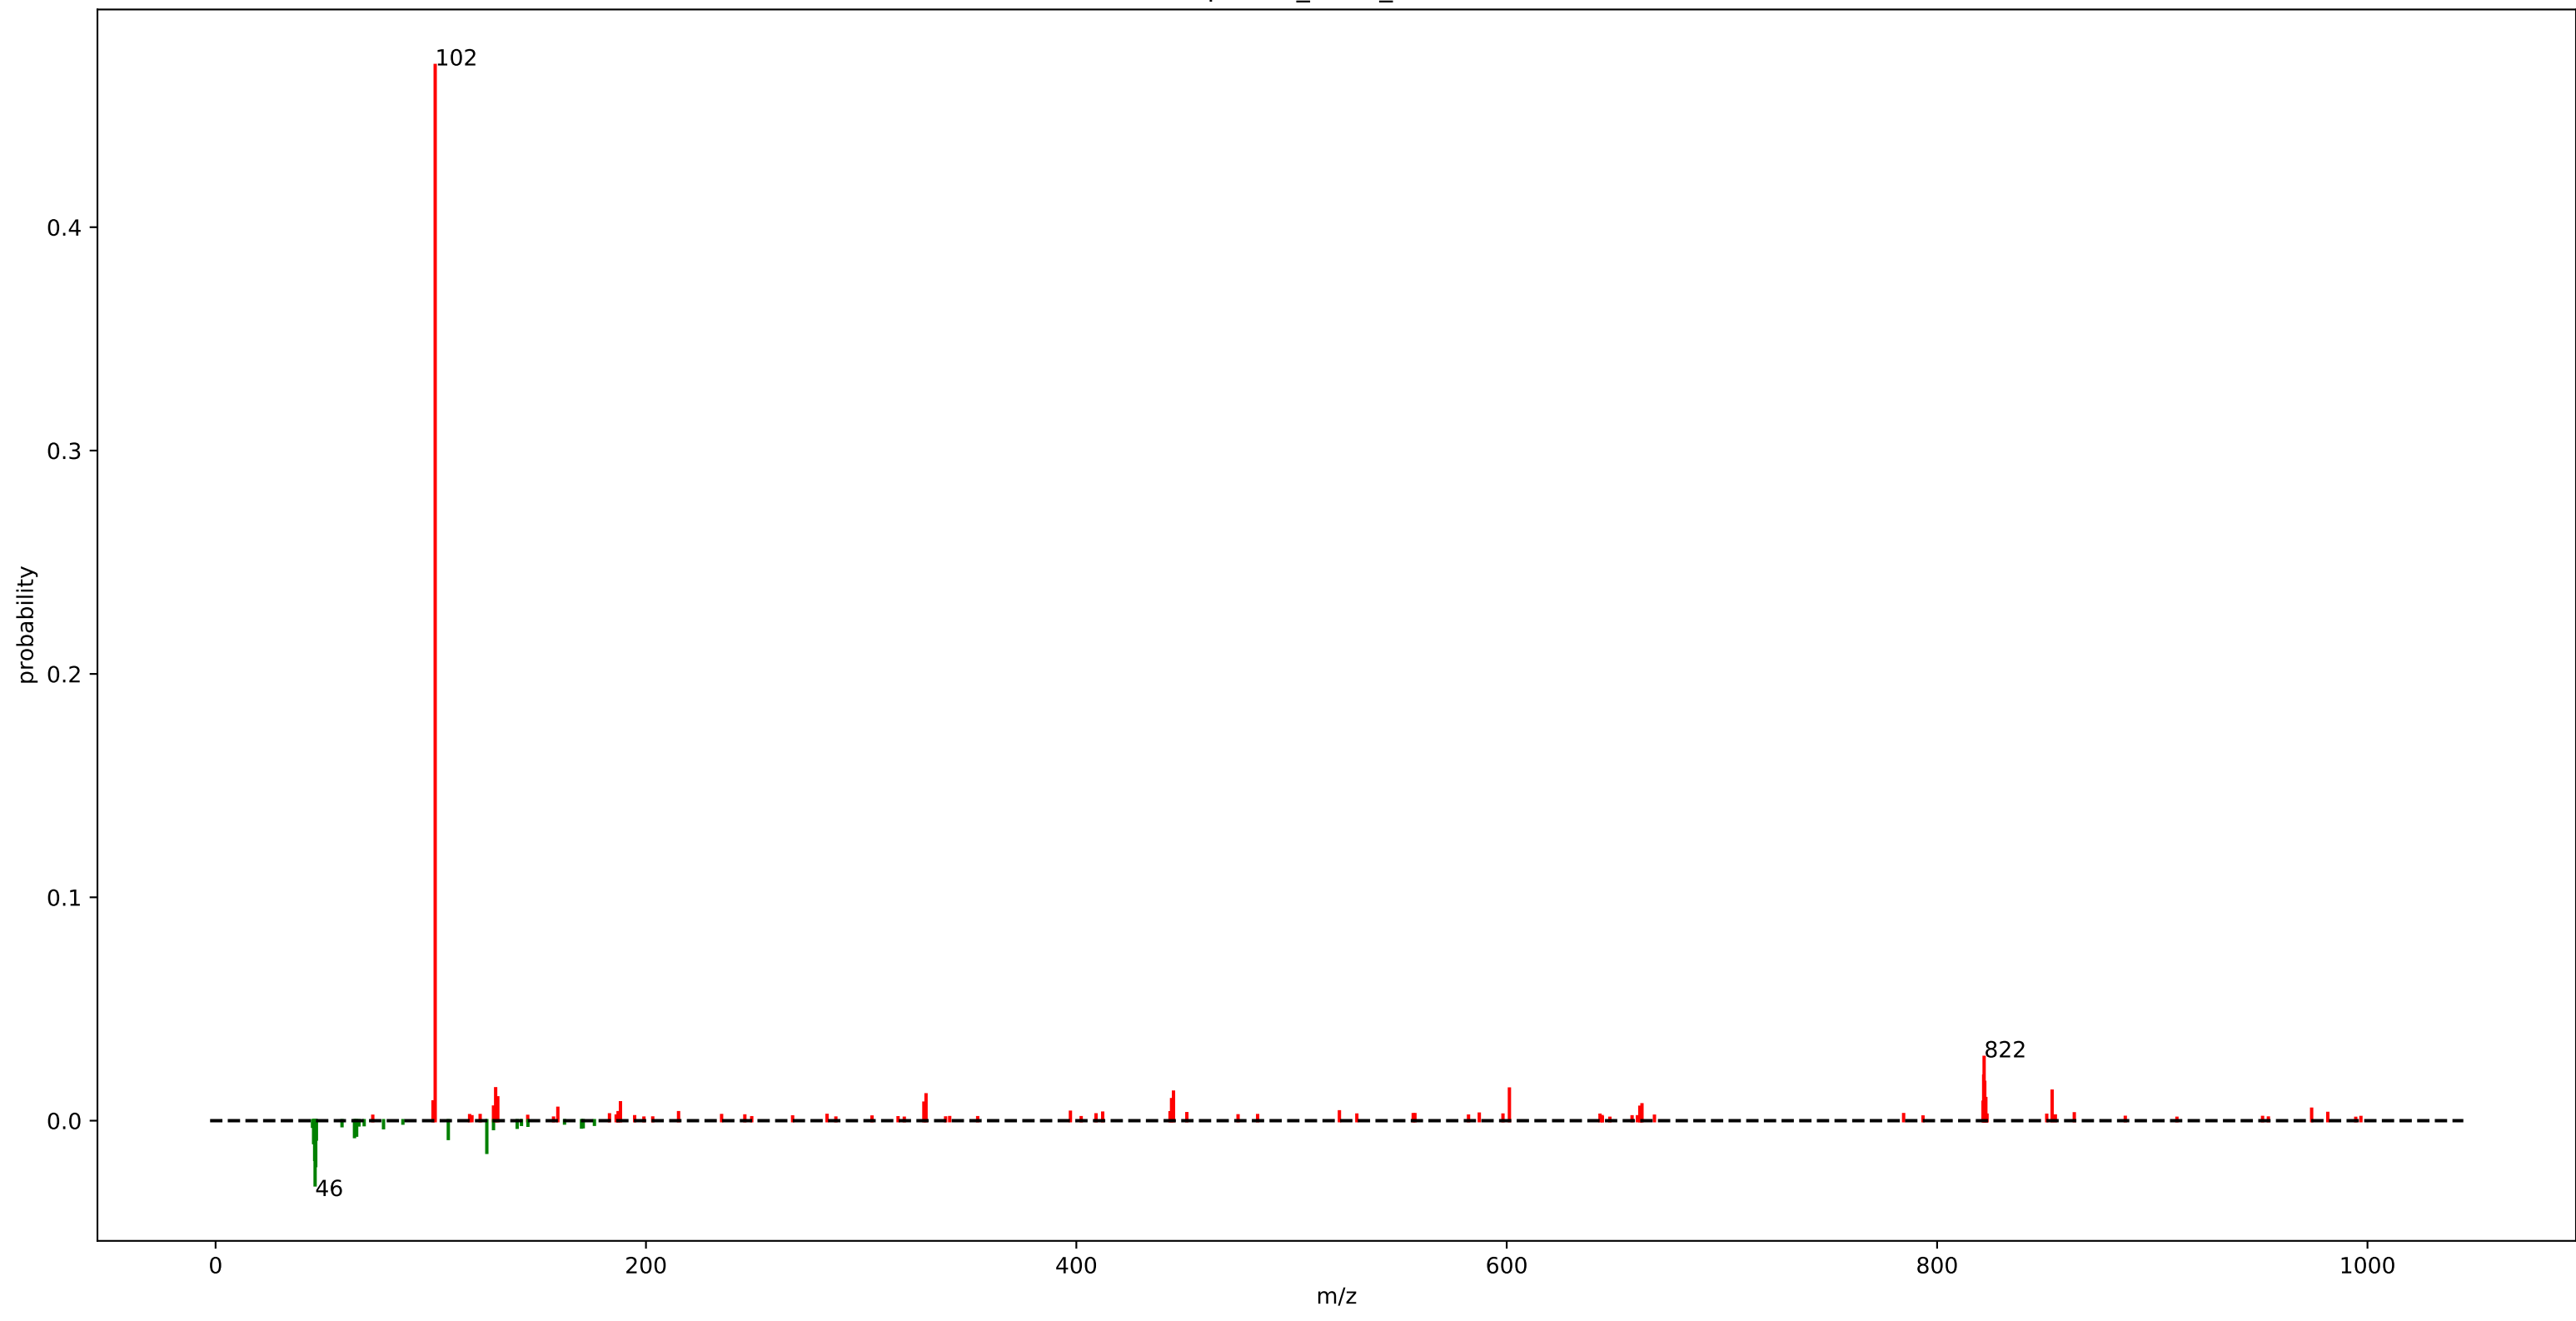

# StrepSalini\_motif\_223.m2m

|                   |        |                   |        |
|-------------------|--------|-------------------|--------|
| fragment_102.0525 | : 0.47 | fragment_821.3500 | : 0.01 |
| loss_46.2500      | : 0.03 | loss_46.8500      | : 0.01 |
| fragment_821.8500 | : 0.03 | fragment_188.1500 | : 0.01 |
| loss_46.5500      | : 0.02 | loss_108.1525     | : 0.01 |
| fragment_821.6500 | : 0.02 | fragment_329.1500 | : 0.01 |
| loss_46.0500      | : 0.02 | fragment_662.8500 | : 0.01 |
| fragment_822.1500 | : 0.02 | loss_64.5500      | : 0.01 |
| fragment_130.1500 | : 0.01 | loss_65.5500      | : 0.01 |
| fragment_601.2500 | : 0.01 | fragment_129.1500 | : 0.01 |
| loss_126.0500     | : 0.01 | fragment_661.8500 | : 0.01 |
| fragment_853.4500 | : 0.01 | fragment_159.0500 | : 0.01 |
| fragment_445.1500 | : 0.01 | fragment_974.0500 | : 0.01 |
| fragment_330.1500 | : 0.01 |                   |        |
| fragment_131.1500 | : 0.01 |                   |        |
| fragment_822.6500 | : 0.01 |                   |        |
| fragment_822.3500 | : 0.01 |                   |        |
| loss_45.5500      | : 0.01 |                   |        |
| loss_45.7500      | : 0.01 |                   |        |
| fragment_444.2500 | : 0.01 |                   |        |
| fragment_101.0500 | : 0.01 |                   |        |



euphorbia\_motif\_299.m2m

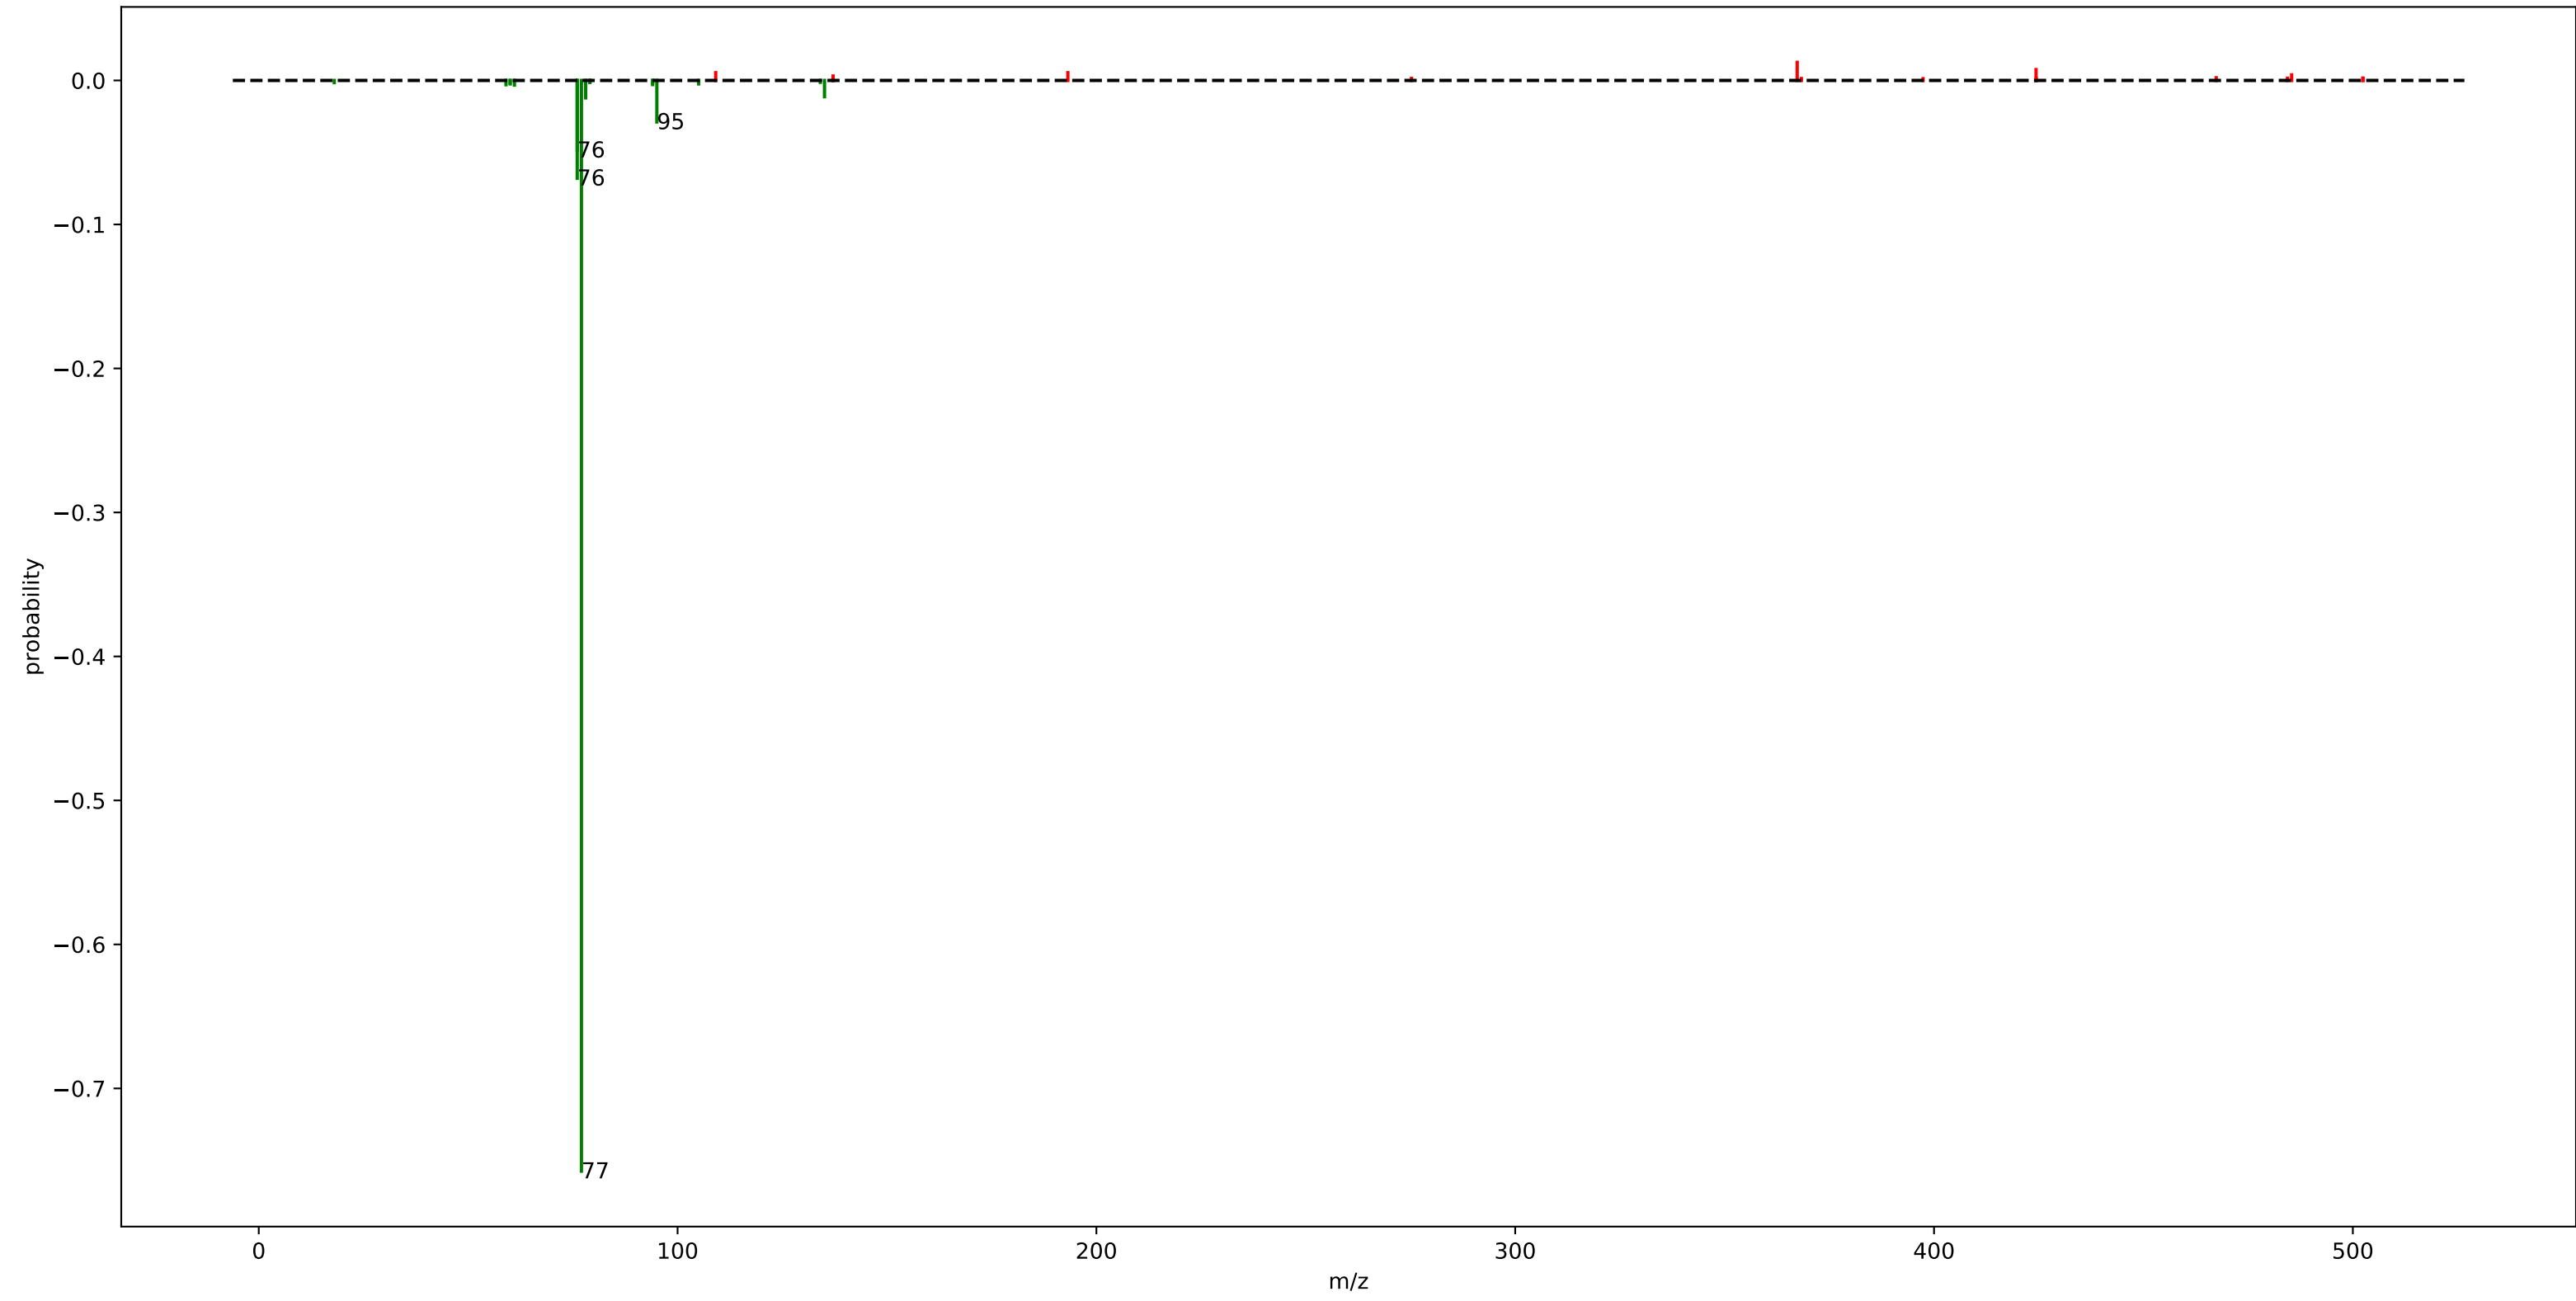

## euphorbia\_motif\_299.m2m

|                   |        |
|-------------------|--------|
| loss_77.0425      | : 0.76 |
| loss_76.0375      | : 0.07 |
| loss_76.0425      | : 0.05 |
| loss_95.0525      | : 0.03 |
| fragment_367.3325 | : 0.01 |
| loss_78.0525      | : 0.01 |
| loss_135.0825     | : 0.01 |
| fragment_424.3625 | : 0.01 |
| fragment_109.1025 | : 0.01 |
| fragment_193.1925 | : 0.01 |

motif\_459

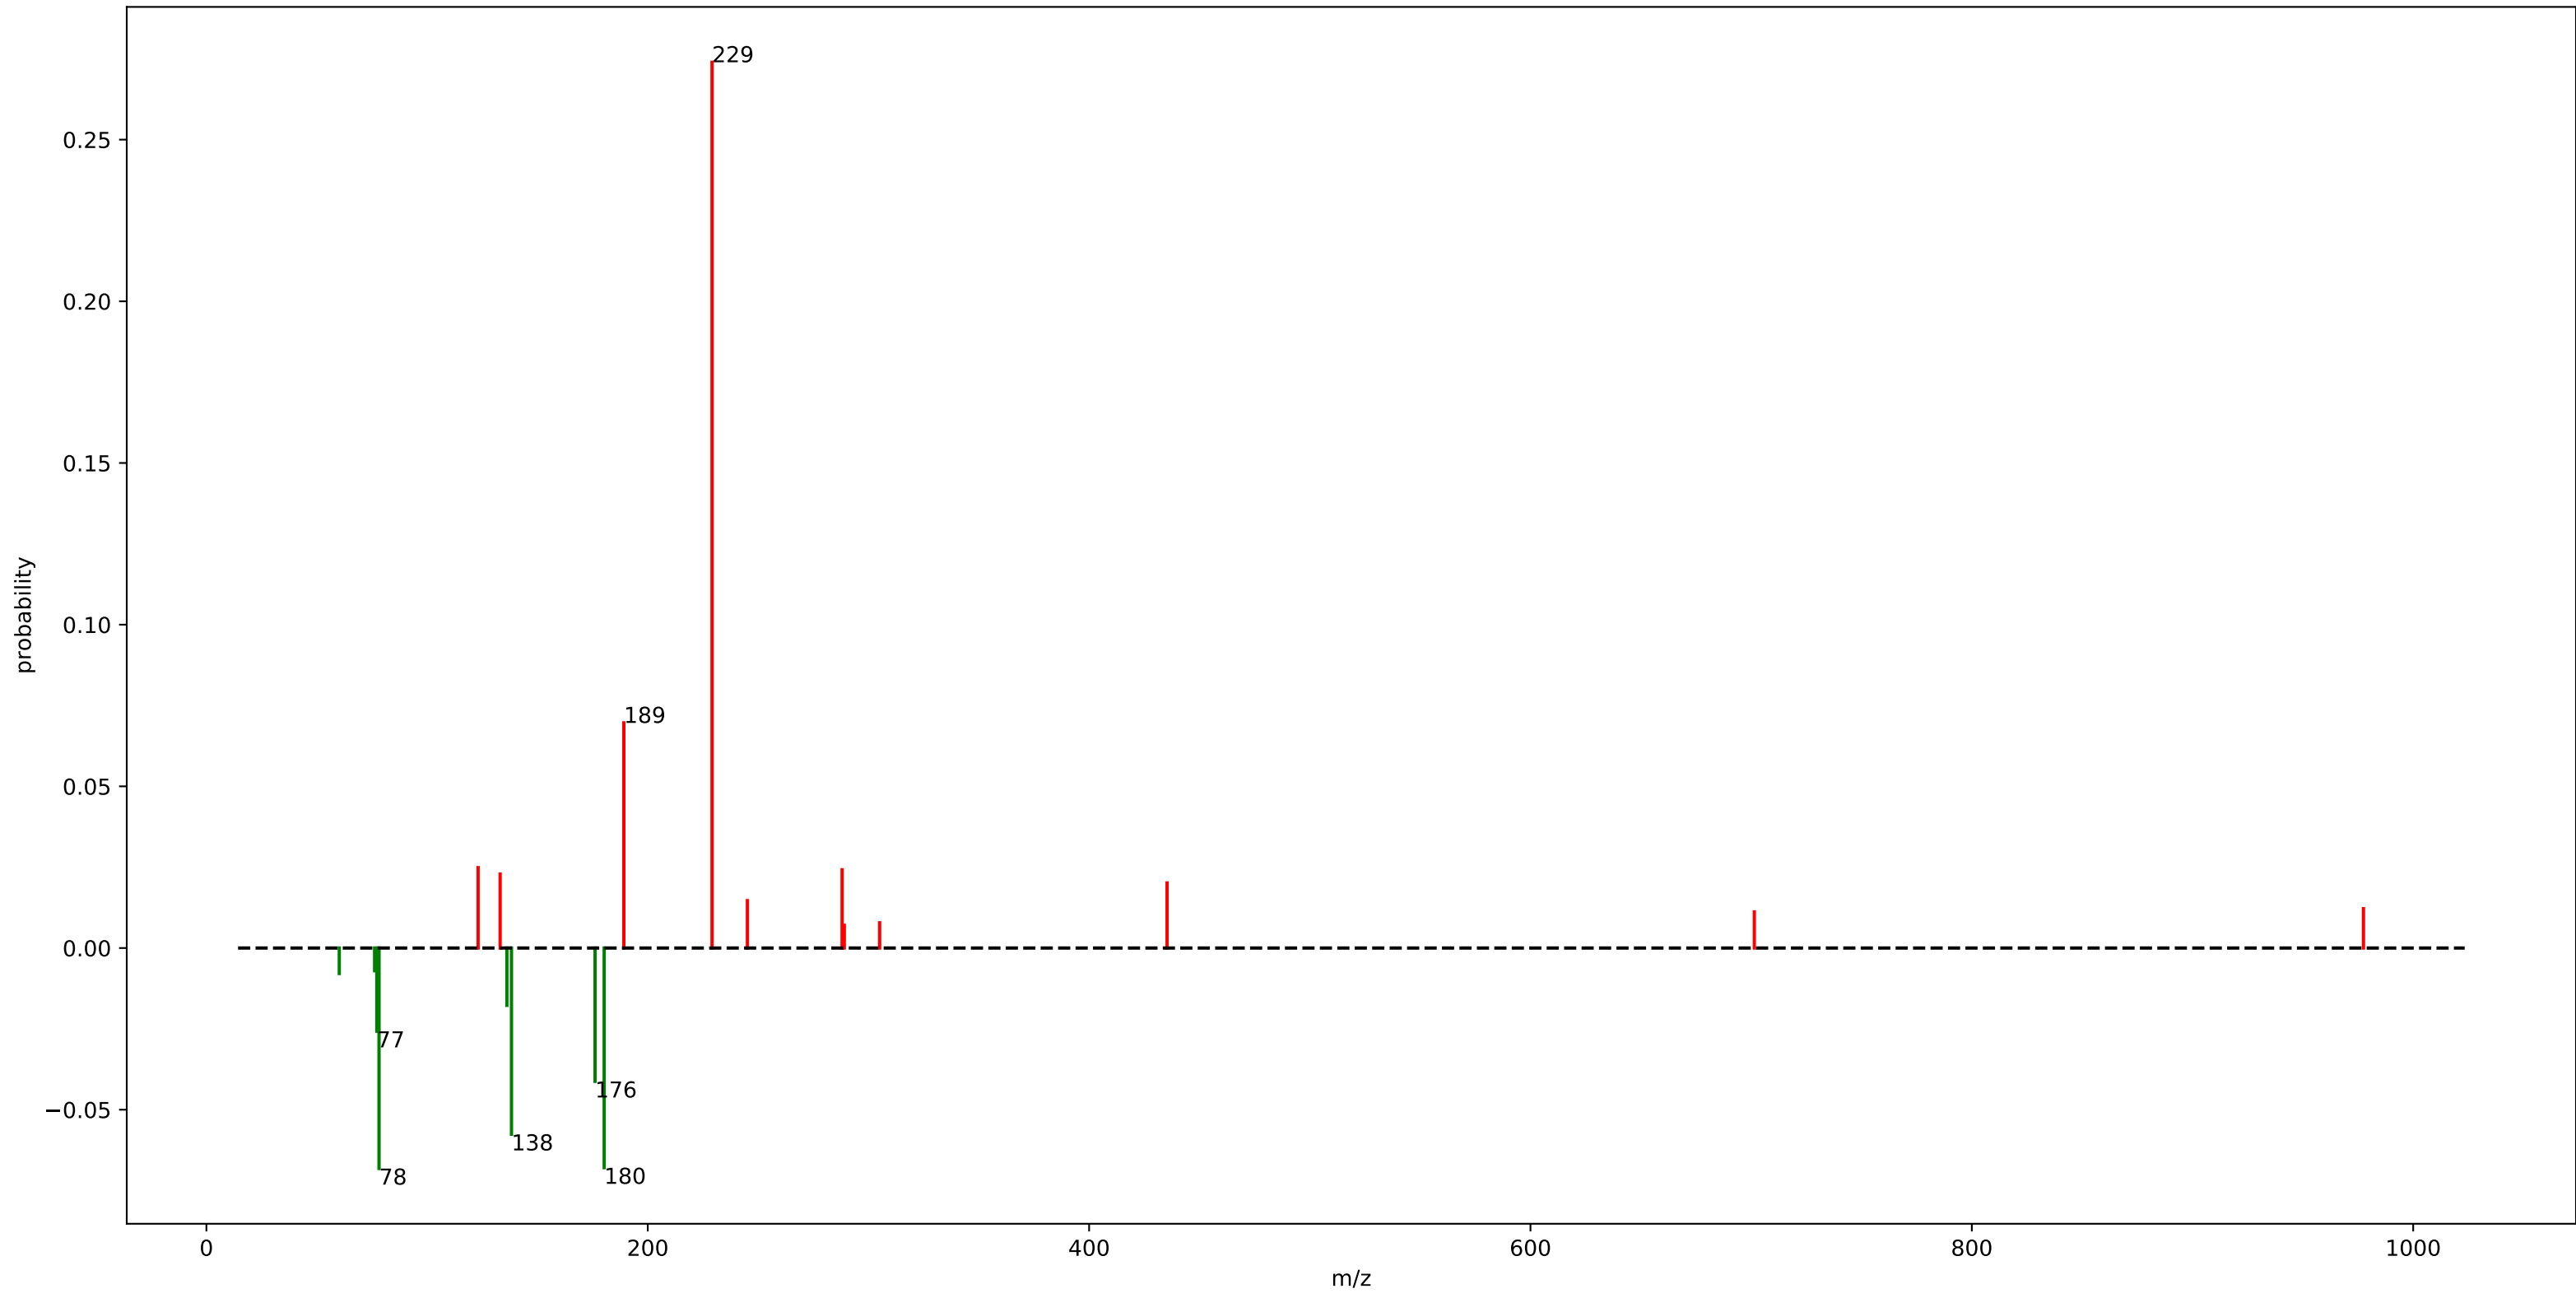

## motif\_459

|                   |        |
|-------------------|--------|
| fragment_229.1275 | : 0.27 |
| fragment_189.1625 | : 0.07 |
| loss_78.2225      | : 0.07 |
| loss_180.2525     | : 0.07 |
| loss_138.2425     | : 0.06 |
| loss_176.1175     | : 0.04 |
| loss_77.2175      | : 0.03 |
| fragment_123.1175 | : 0.02 |
| fragment_288.0625 | : 0.02 |
| fragment_133.1025 | : 0.02 |
| fragment_435.3275 | : 0.02 |
| loss_136.1575     | : 0.02 |
| fragment_245.1525 | : 0.01 |
| fragment_977.4625 | : 0.01 |
| fragment_701.4275 | : 0.01 |
| loss_60.2125      | : 0.01 |
| fragment_305.0725 | : 0.01 |
| loss_76.2225      | : 0.01 |
| fragment_289.0575 | : 0.01 |

motif\_461

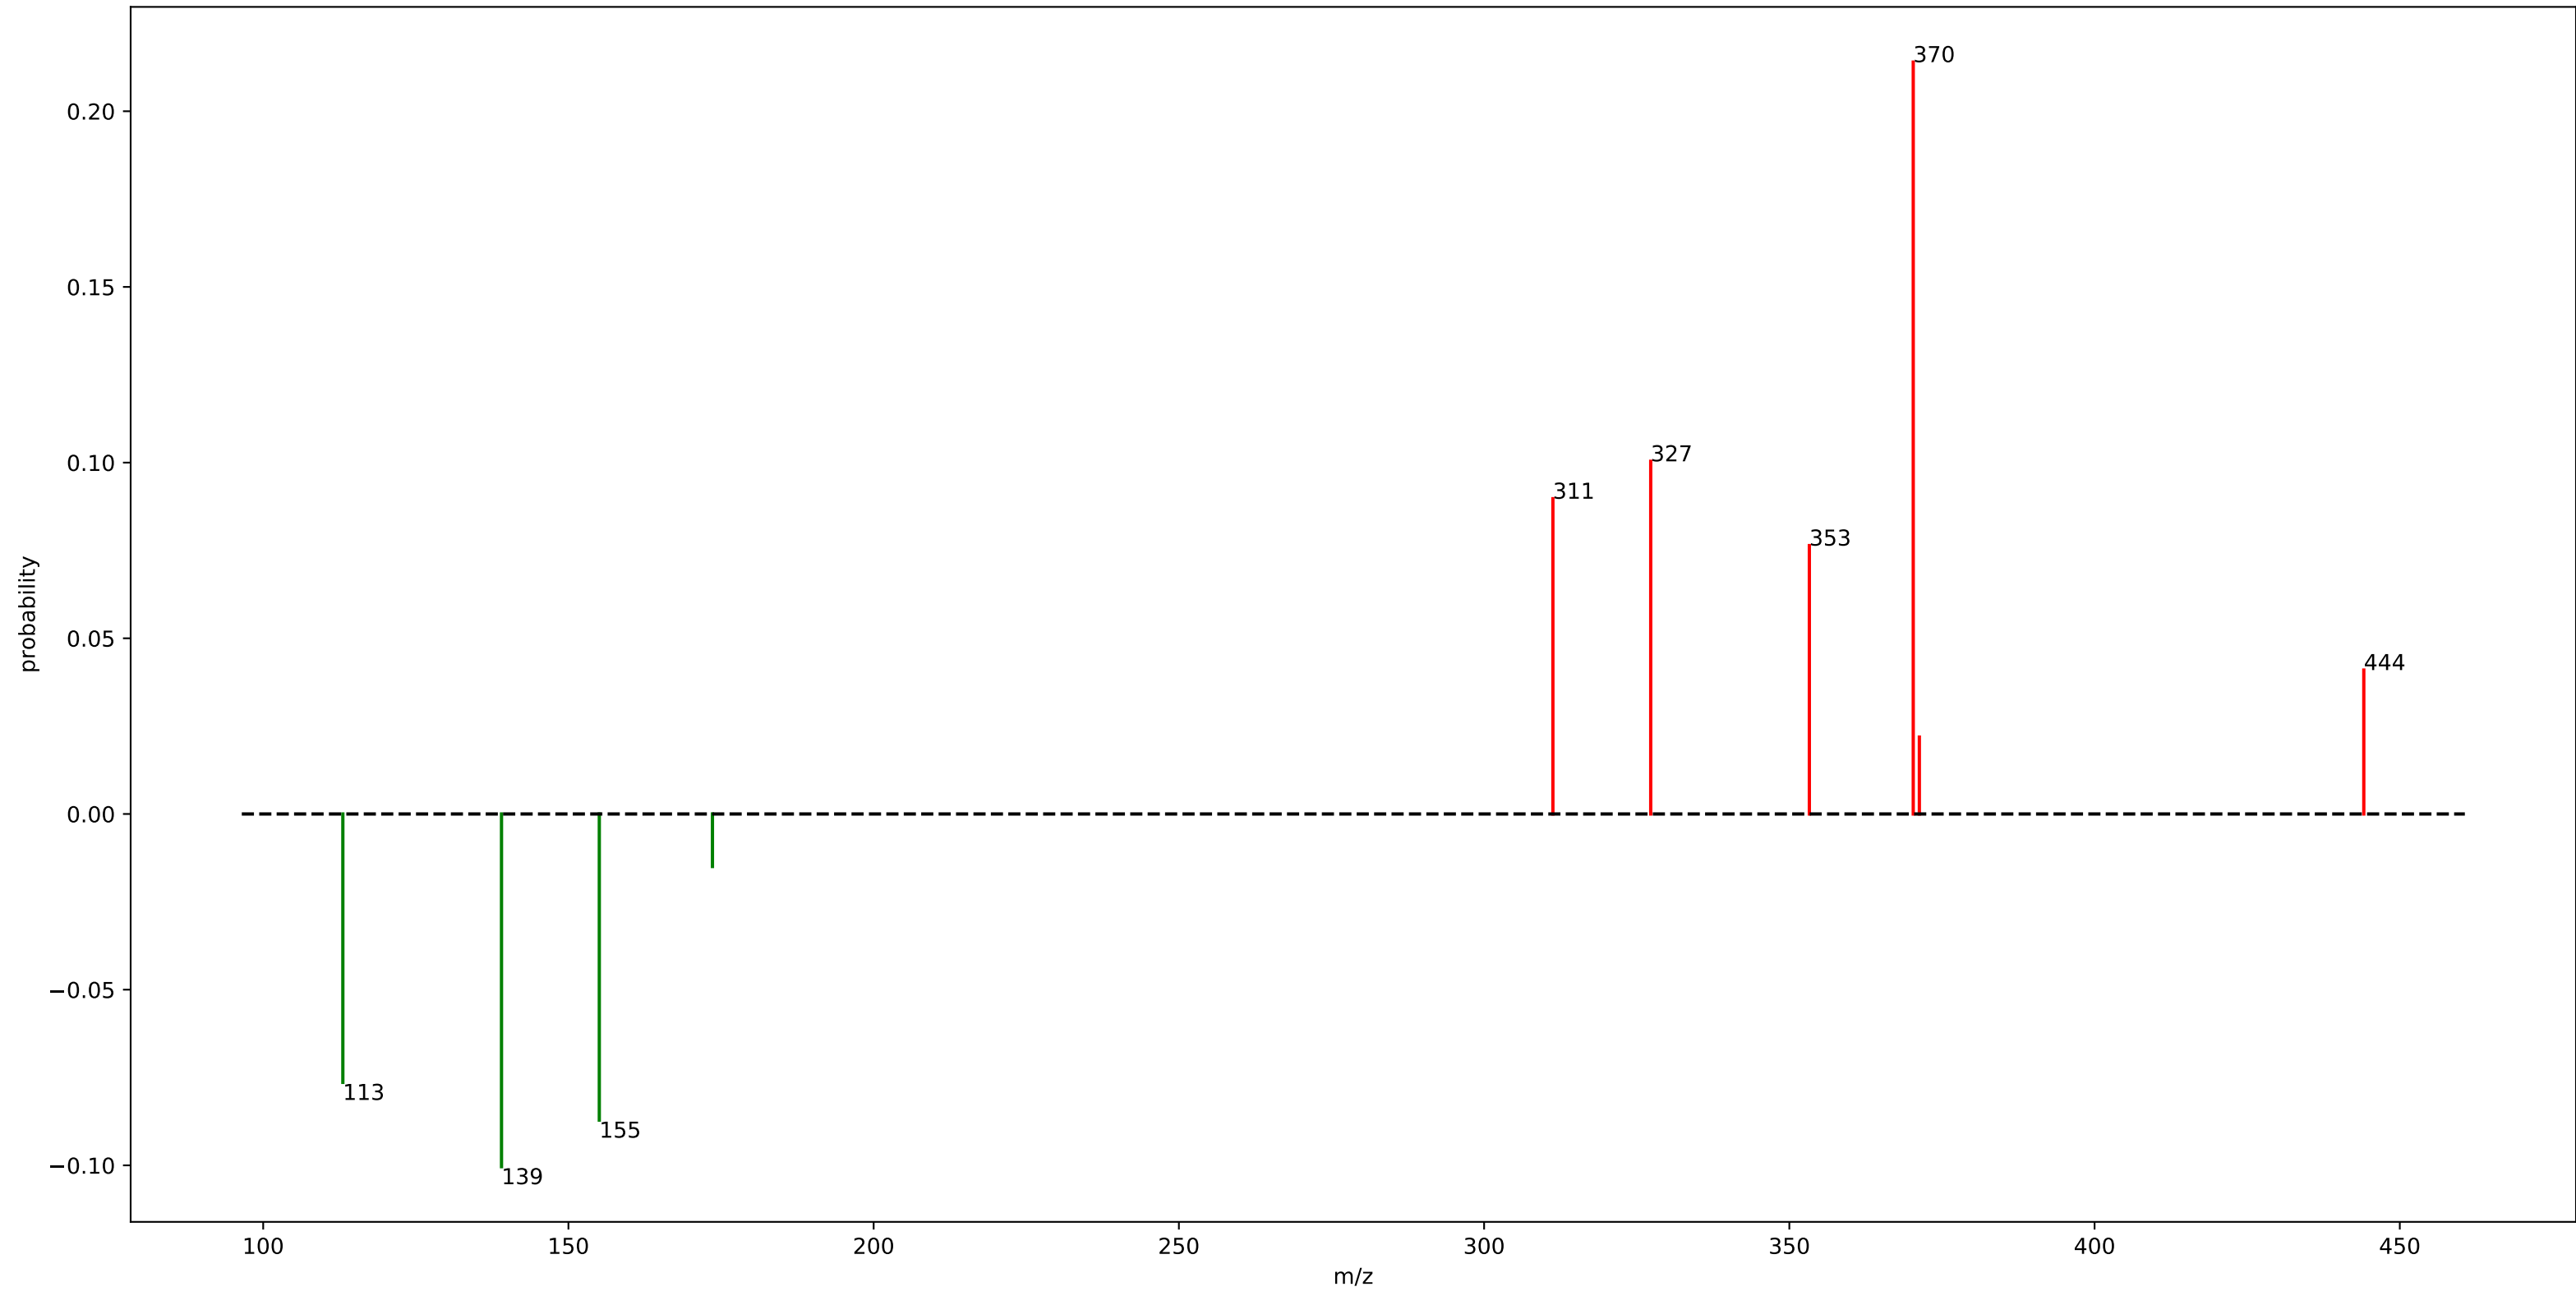

## motif\_461

|                   |        |
|-------------------|--------|
| fragment_370.2975 | : 0.21 |
| fragment_327.2925 | : 0.10 |
| loss_139.0375     | : 0.10 |
| fragment_311.2675 | : 0.09 |
| loss_155.0575     | : 0.09 |
| fragment_353.2775 | : 0.08 |
| loss_113.0475     | : 0.08 |
| fragment_444.1025 | : 0.04 |
| fragment_371.2975 | : 0.02 |
| loss_173.5925     | : 0.01 |

motif\_564

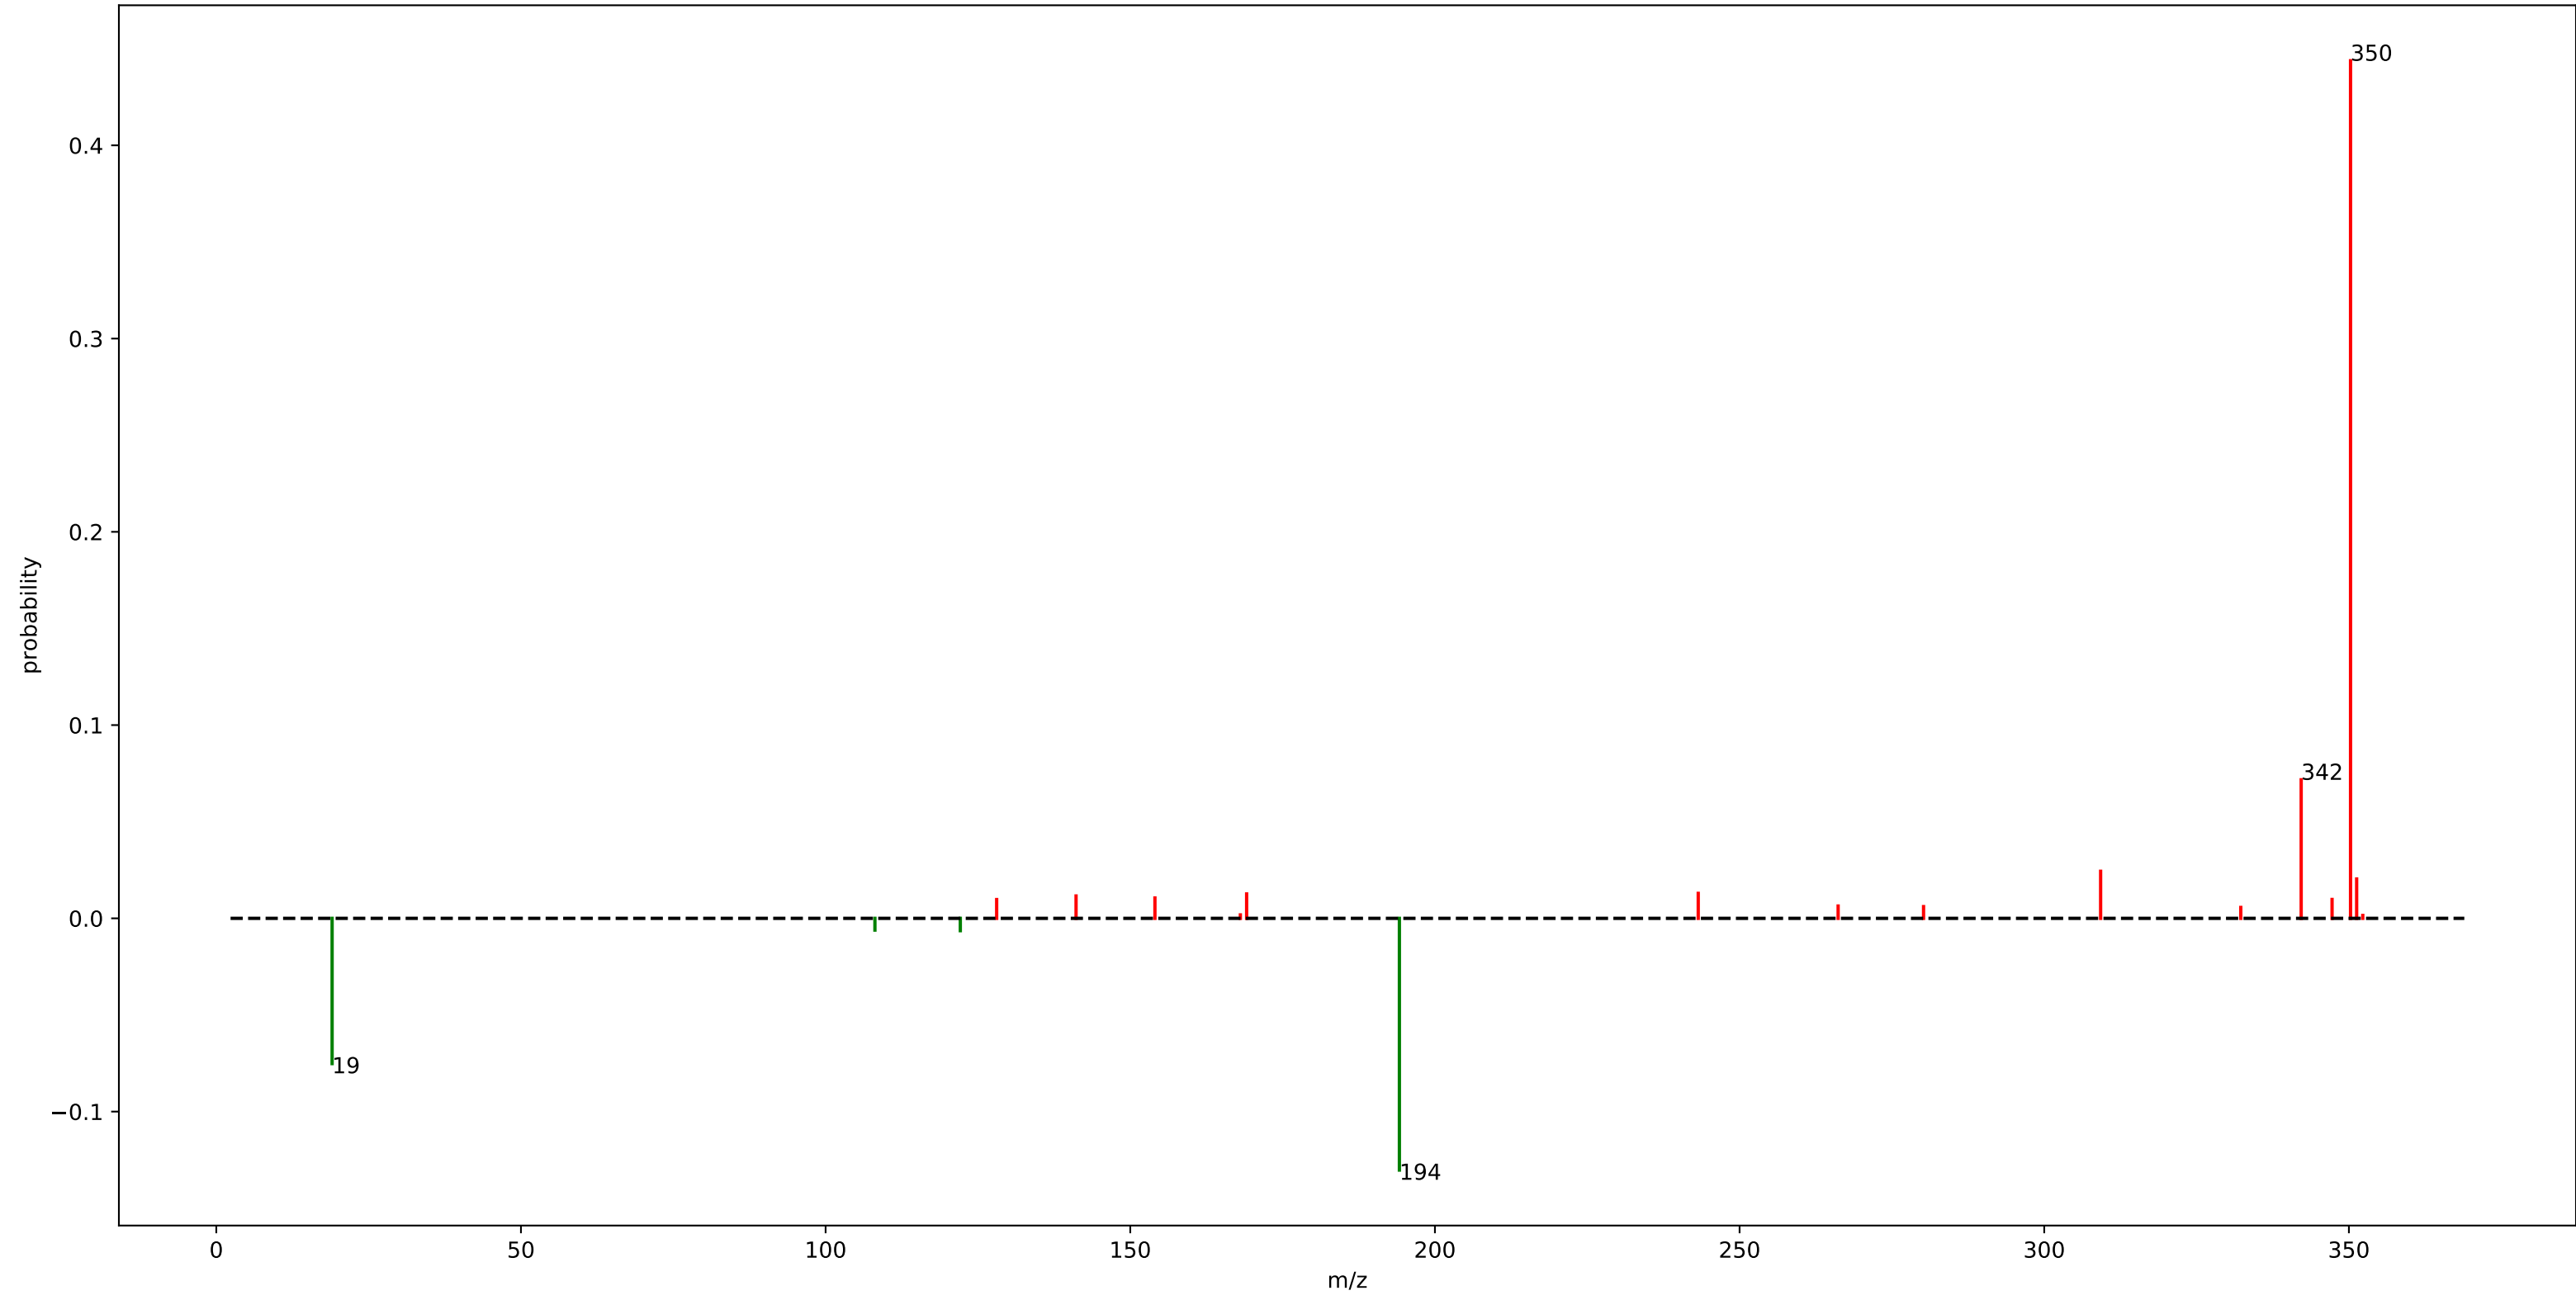

## motif\_564

|                   |        |
|-------------------|--------|
| fragment_350.2675 | : 0.44 |
| loss_194.1675     | : 0.13 |
| loss_19.0075      | : 0.08 |
| fragment_342.1675 | : 0.07 |
| fragment_309.2525 | : 0.02 |
| fragment_351.2725 | : 0.02 |
| fragment_243.2125 | : 0.01 |
| fragment_169.0975 | : 0.01 |
| fragment_141.1025 | : 0.01 |
| fragment_154.0475 | : 0.01 |
| fragment_347.2375 | : 0.01 |
| fragment_128.0725 | : 0.01 |
| loss_122.1075     | : 0.01 |
| fragment_266.1725 | : 0.01 |
| loss_108.0925     | : 0.01 |
| fragment_280.1925 | : 0.01 |
| fragment_332.2575 | : 0.01 |



urine\_mass2motif\_134.m2m

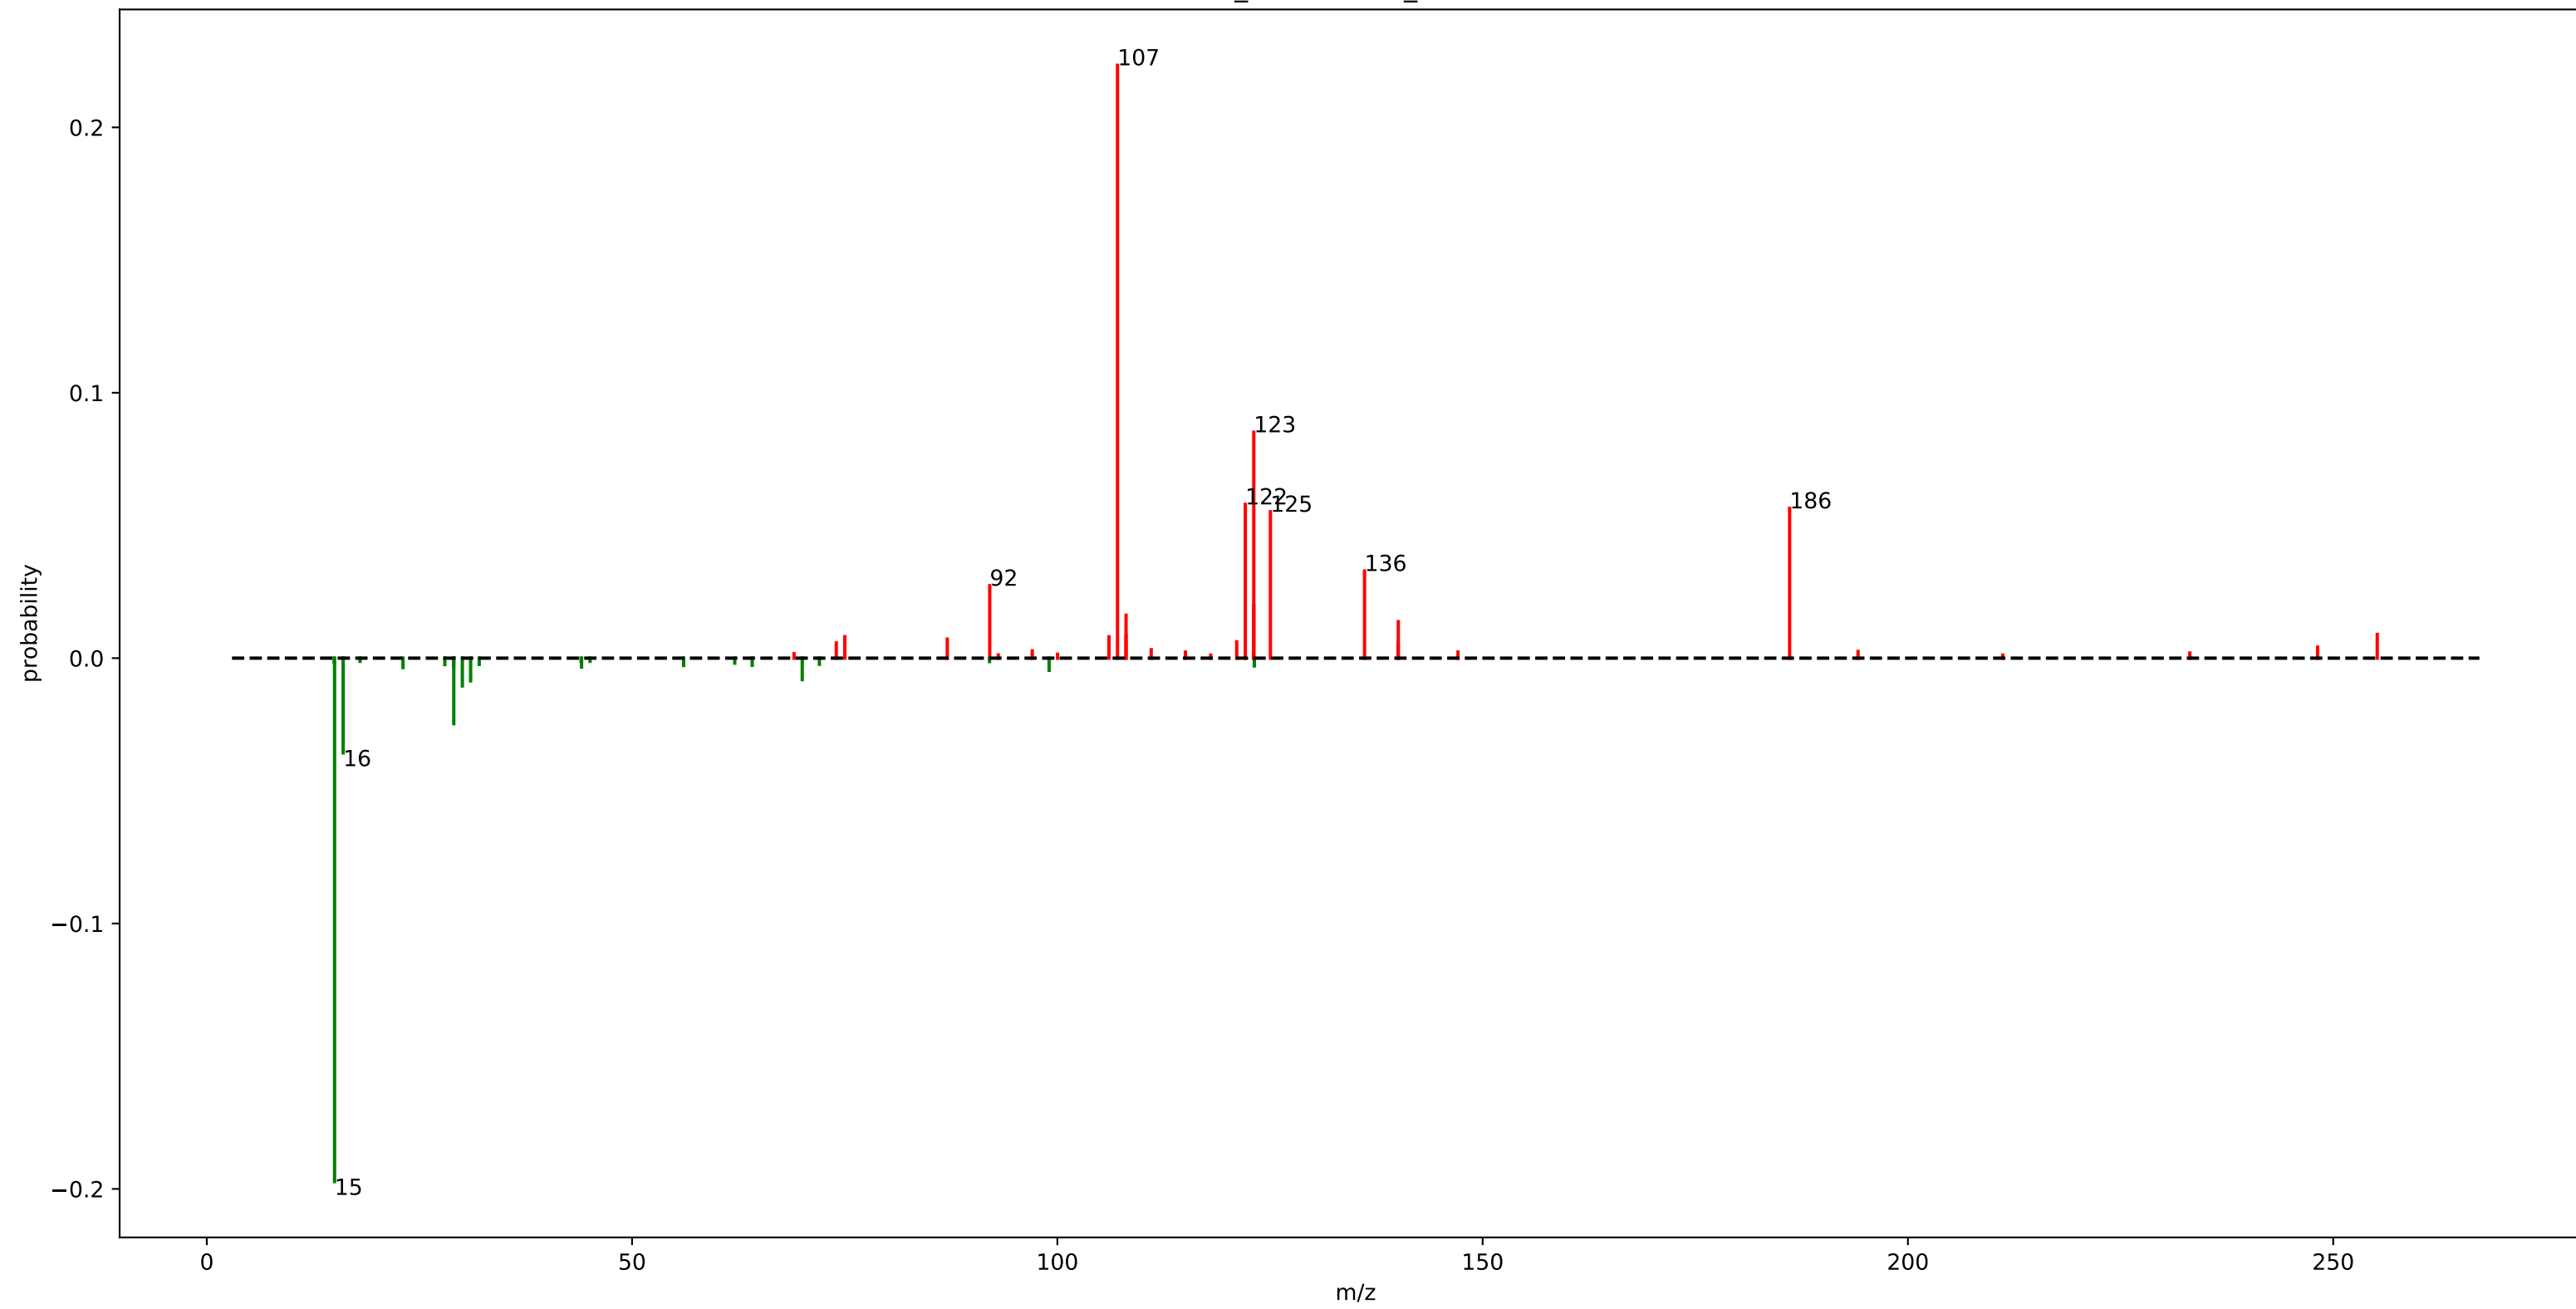

# urine\_mass2motif\_134.m2m

|                   |        |                   |        |
|-------------------|--------|-------------------|--------|
| fragment_107.0725 | : 0.22 | fragment_87.0575  | : 0.01 |
| loss_15.0225      | : 0.20 | fragment_121.0875 | : 0.01 |
| fragment_123.0925 | : 0.09 | fragment_74.0075  | : 0.01 |
| fragment_122.0975 | : 0.06 | fragment_140.0725 | : 0.01 |
| fragment_186.0875 | : 0.06 |                   |        |
| fragment_125.0475 | : 0.06 |                   |        |
| loss_16.0325      | : 0.04 |                   |        |
| fragment_136.1125 | : 0.03 |                   |        |
| fragment_92.0475  | : 0.03 |                   |        |
| loss_29.0375      | : 0.02 |                   |        |
| fragment_123.0975 | : 0.02 |                   |        |
| fragment_108.0775 | : 0.02 |                   |        |
| fragment_140.0825 | : 0.01 |                   |        |
| loss_30.0475      | : 0.01 |                   |        |
| fragment_255.1775 | : 0.01 |                   |        |
| loss_31.0175      | : 0.01 |                   |        |
| fragment_108.0675 | : 0.01 |                   |        |
| loss_70.0075      | : 0.01 |                   |        |
| fragment_75.0125  | : 0.01 |                   |        |
| fragment_106.0675 | : 0.01 |                   |        |

rhamn\_motif\_148.m2m

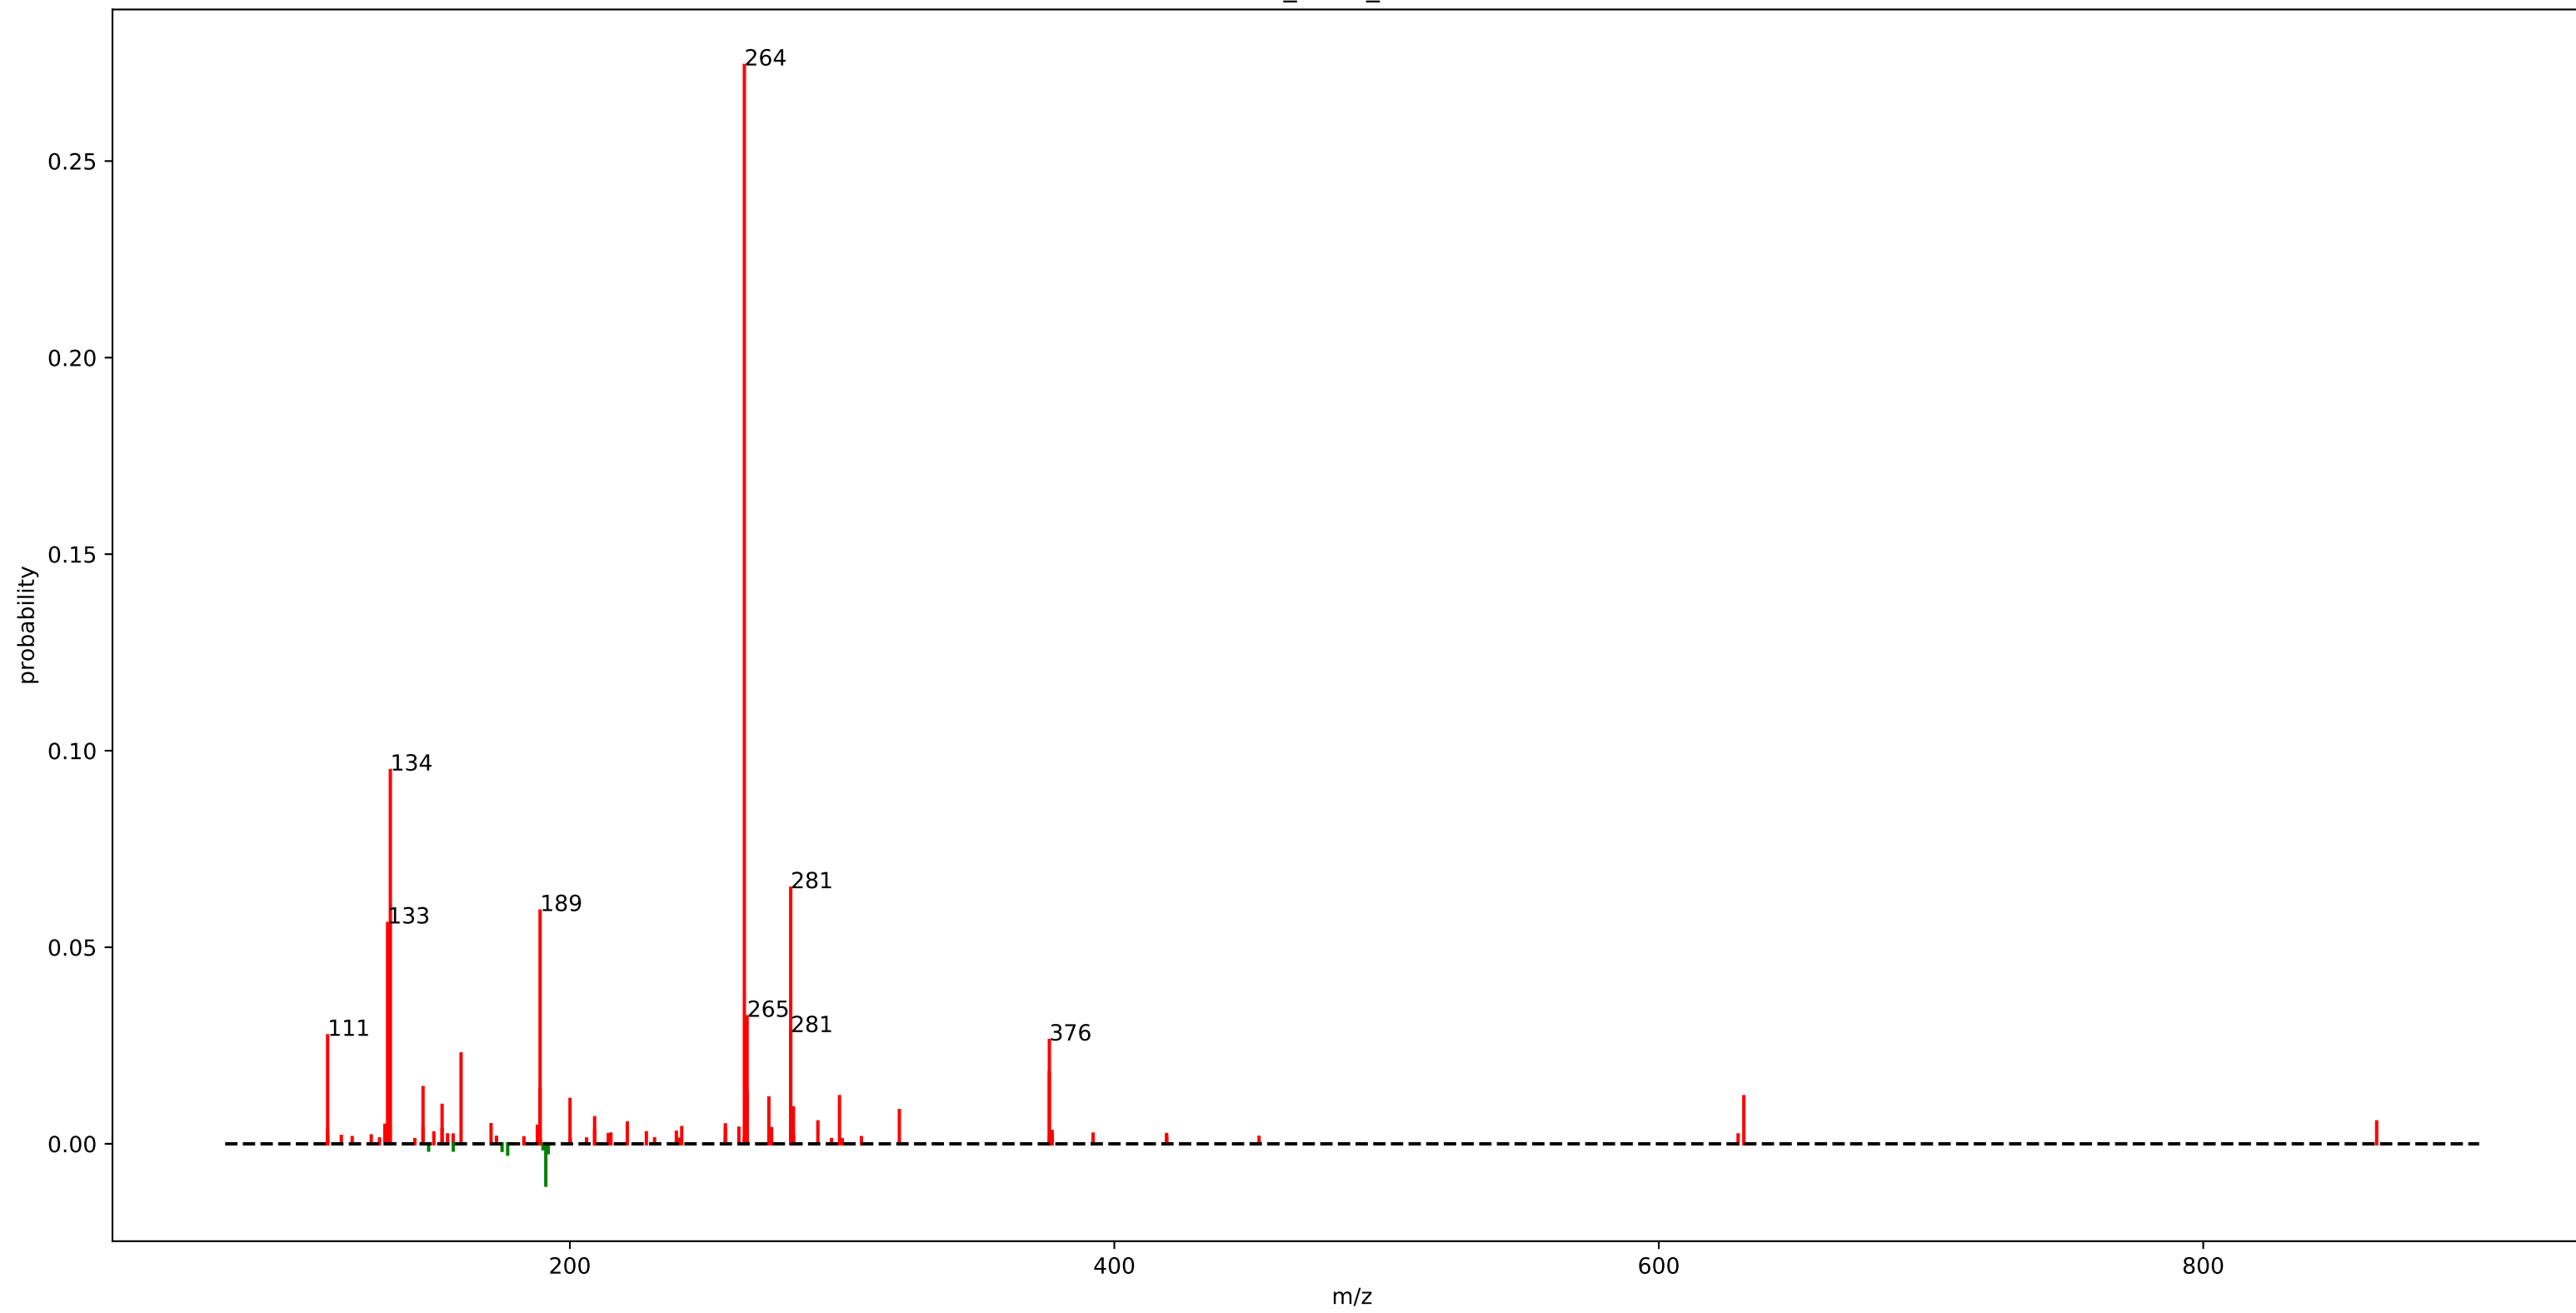

## rhamn\_motif\_148.m2m

|                   |        |                   |        |
|-------------------|--------|-------------------|--------|
| fragment_264.1025 | : 0.27 | fragment_282.1325 | : 0.01 |
| fragment_134.0625 | : 0.09 | fragment_321.0325 | : 0.01 |
| fragment_281.1275 | : 0.07 | fragment_209.0975 | : 0.01 |
| fragment_189.0675 | : 0.06 | fragment_863.7075 | : 0.01 |
| fragment_133.0525 | : 0.06 | fragment_291.1125 | : 0.01 |
| fragment_265.1075 | : 0.03 | fragment_221.0975 | : 0.01 |
| fragment_281.1325 | : 0.03 |                   |        |
| fragment_111.0175 | : 0.03 |                   |        |
| fragment_376.1325 | : 0.03 |                   |        |
| fragment_160.0375 | : 0.02 |                   |        |
| fragment_376.1275 | : 0.02 |                   |        |
| fragment_146.0625 | : 0.01 |                   |        |
| fragment_189.0625 | : 0.01 |                   |        |
| fragment_265.1025 | : 0.01 |                   |        |
| fragment_299.0525 | : 0.01 |                   |        |
| fragment_631.2425 | : 0.01 |                   |        |
| fragment_273.1025 | : 0.01 |                   |        |
| fragment_200.0575 | : 0.01 |                   |        |
| loss_191.1675     | : 0.01 |                   |        |
| fragment_153.0675 | : 0.01 |                   |        |

urine\_mass2motif\_100.m2m

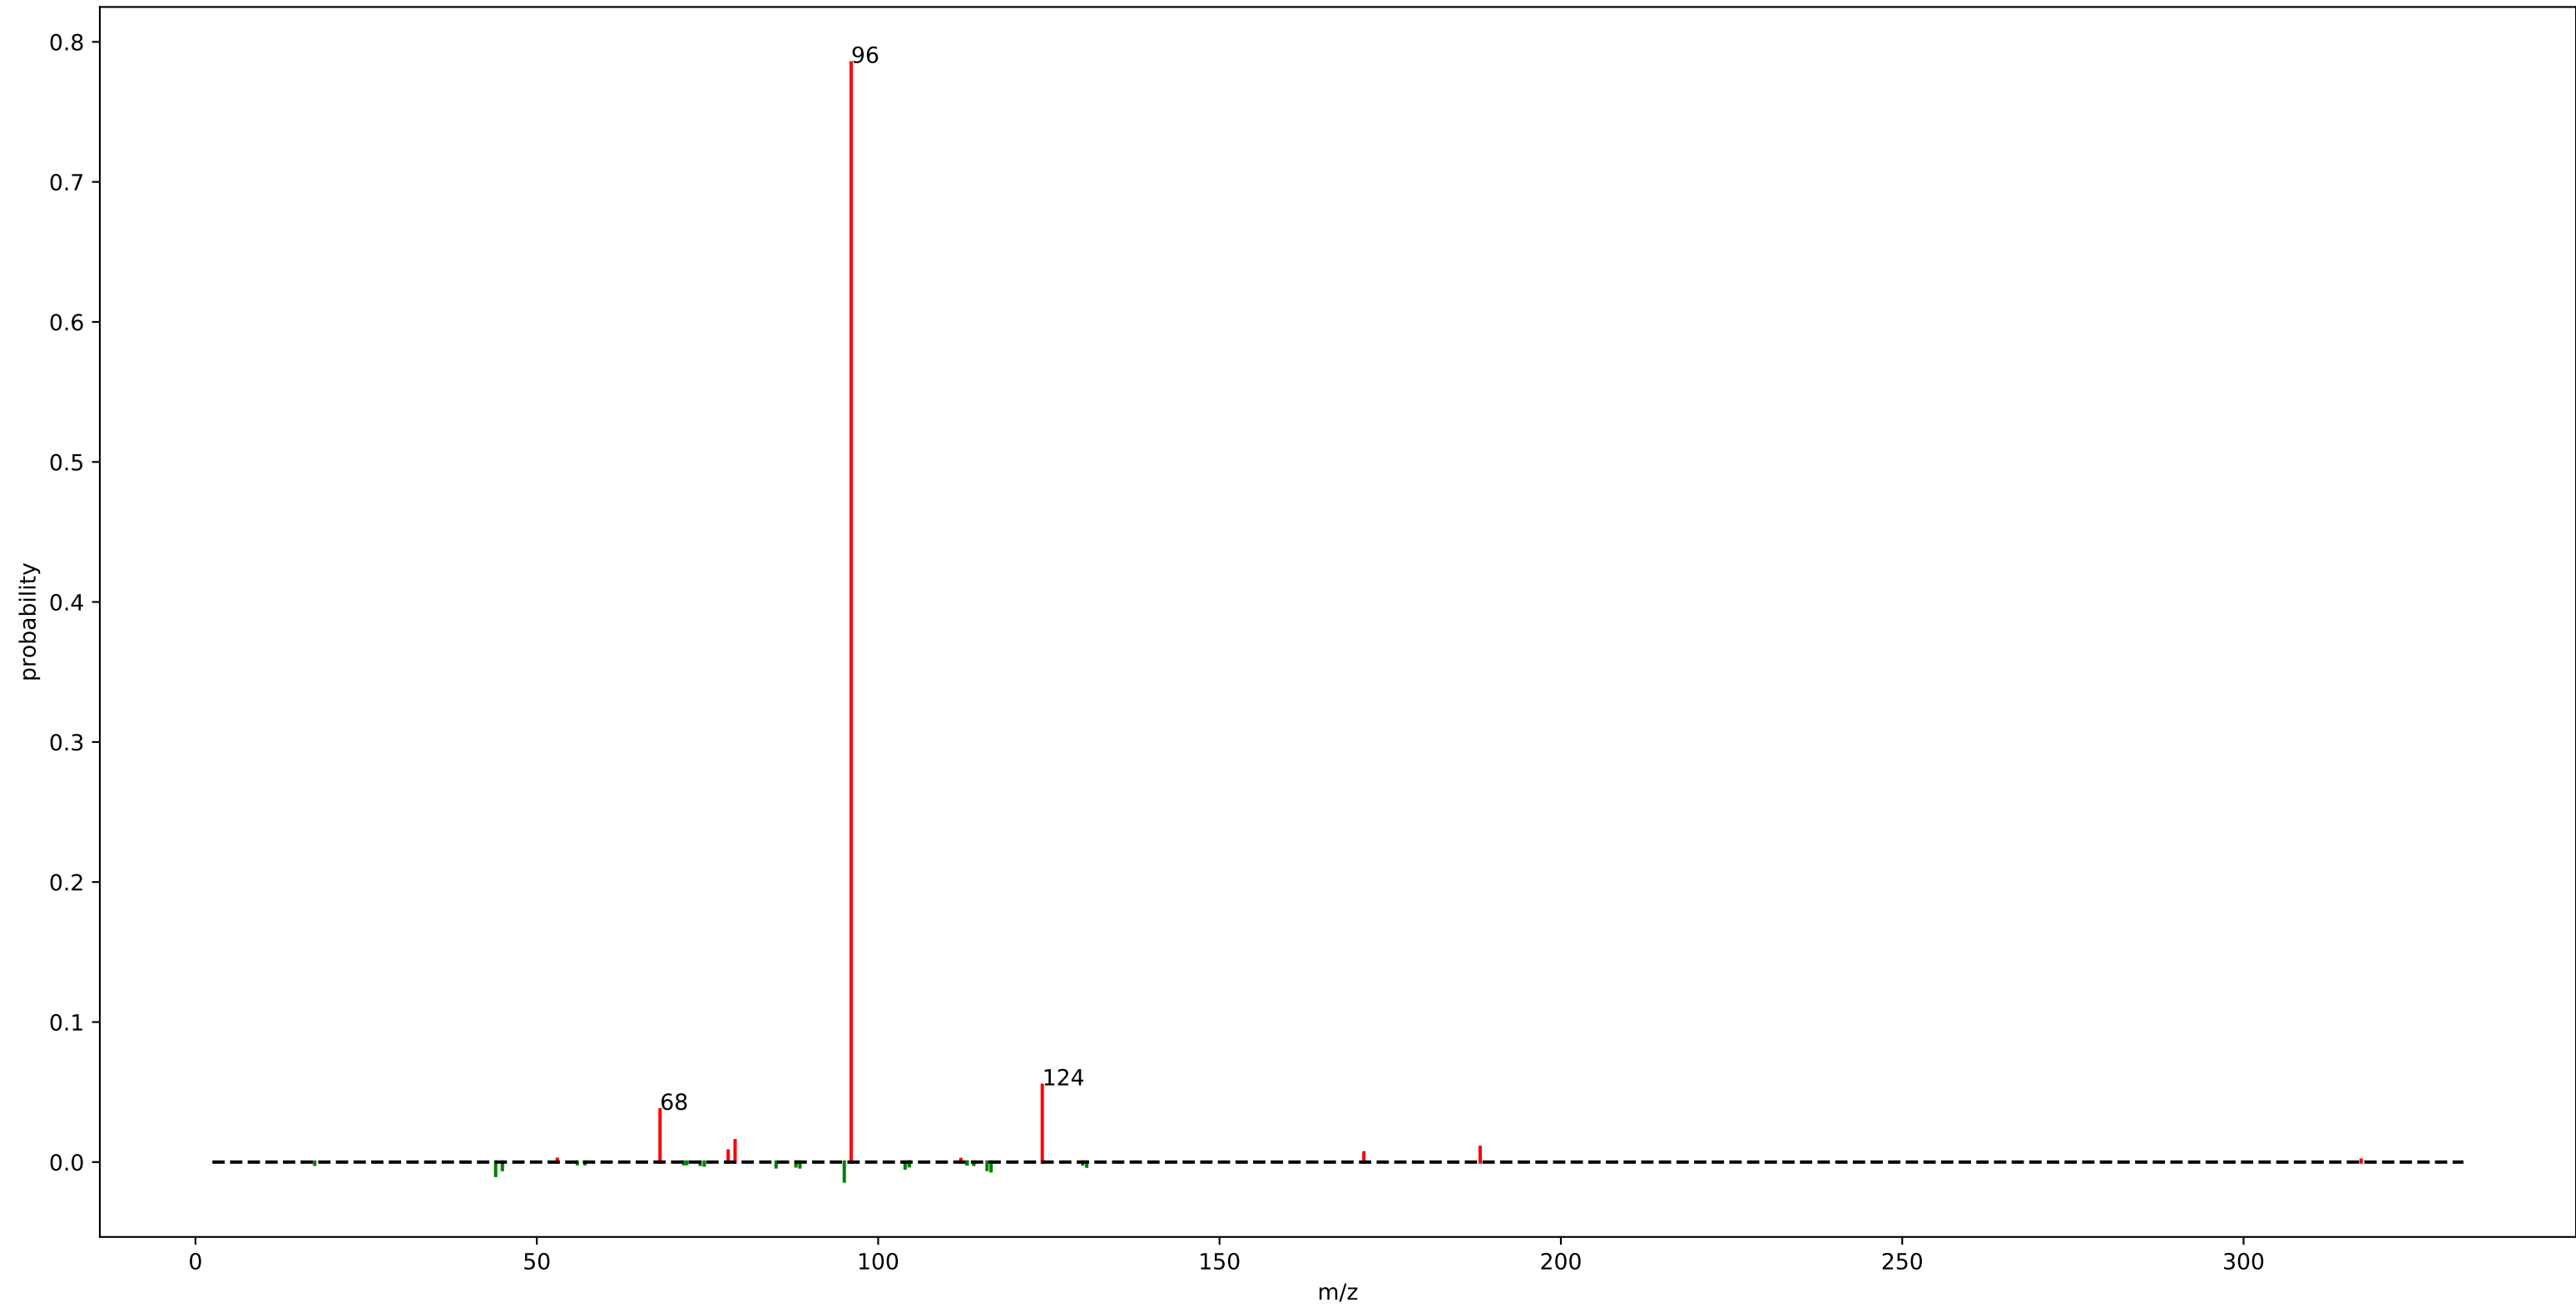

## urine\_mass2motif\_100.m2m

|                   |        |
|-------------------|--------|
| fragment_96.0425  | : 0.78 |
| fragment_124.0375 | : 0.05 |
| fragment_68.0475  | : 0.04 |
| fragment_79.0425  | : 0.02 |
| loss_95.0375      | : 0.01 |
| fragment_188.1775 | : 0.01 |
| loss_43.9725      | : 0.01 |
| fragment_78.0325  | : 0.01 |
| fragment_171.1475 | : 0.01 |
| loss_116.5375     | : 0.01 |
| loss_44.9575      | : 0.01 |
| loss_115.9475     | : 0.01 |

gnps\_motif\_0.m2m

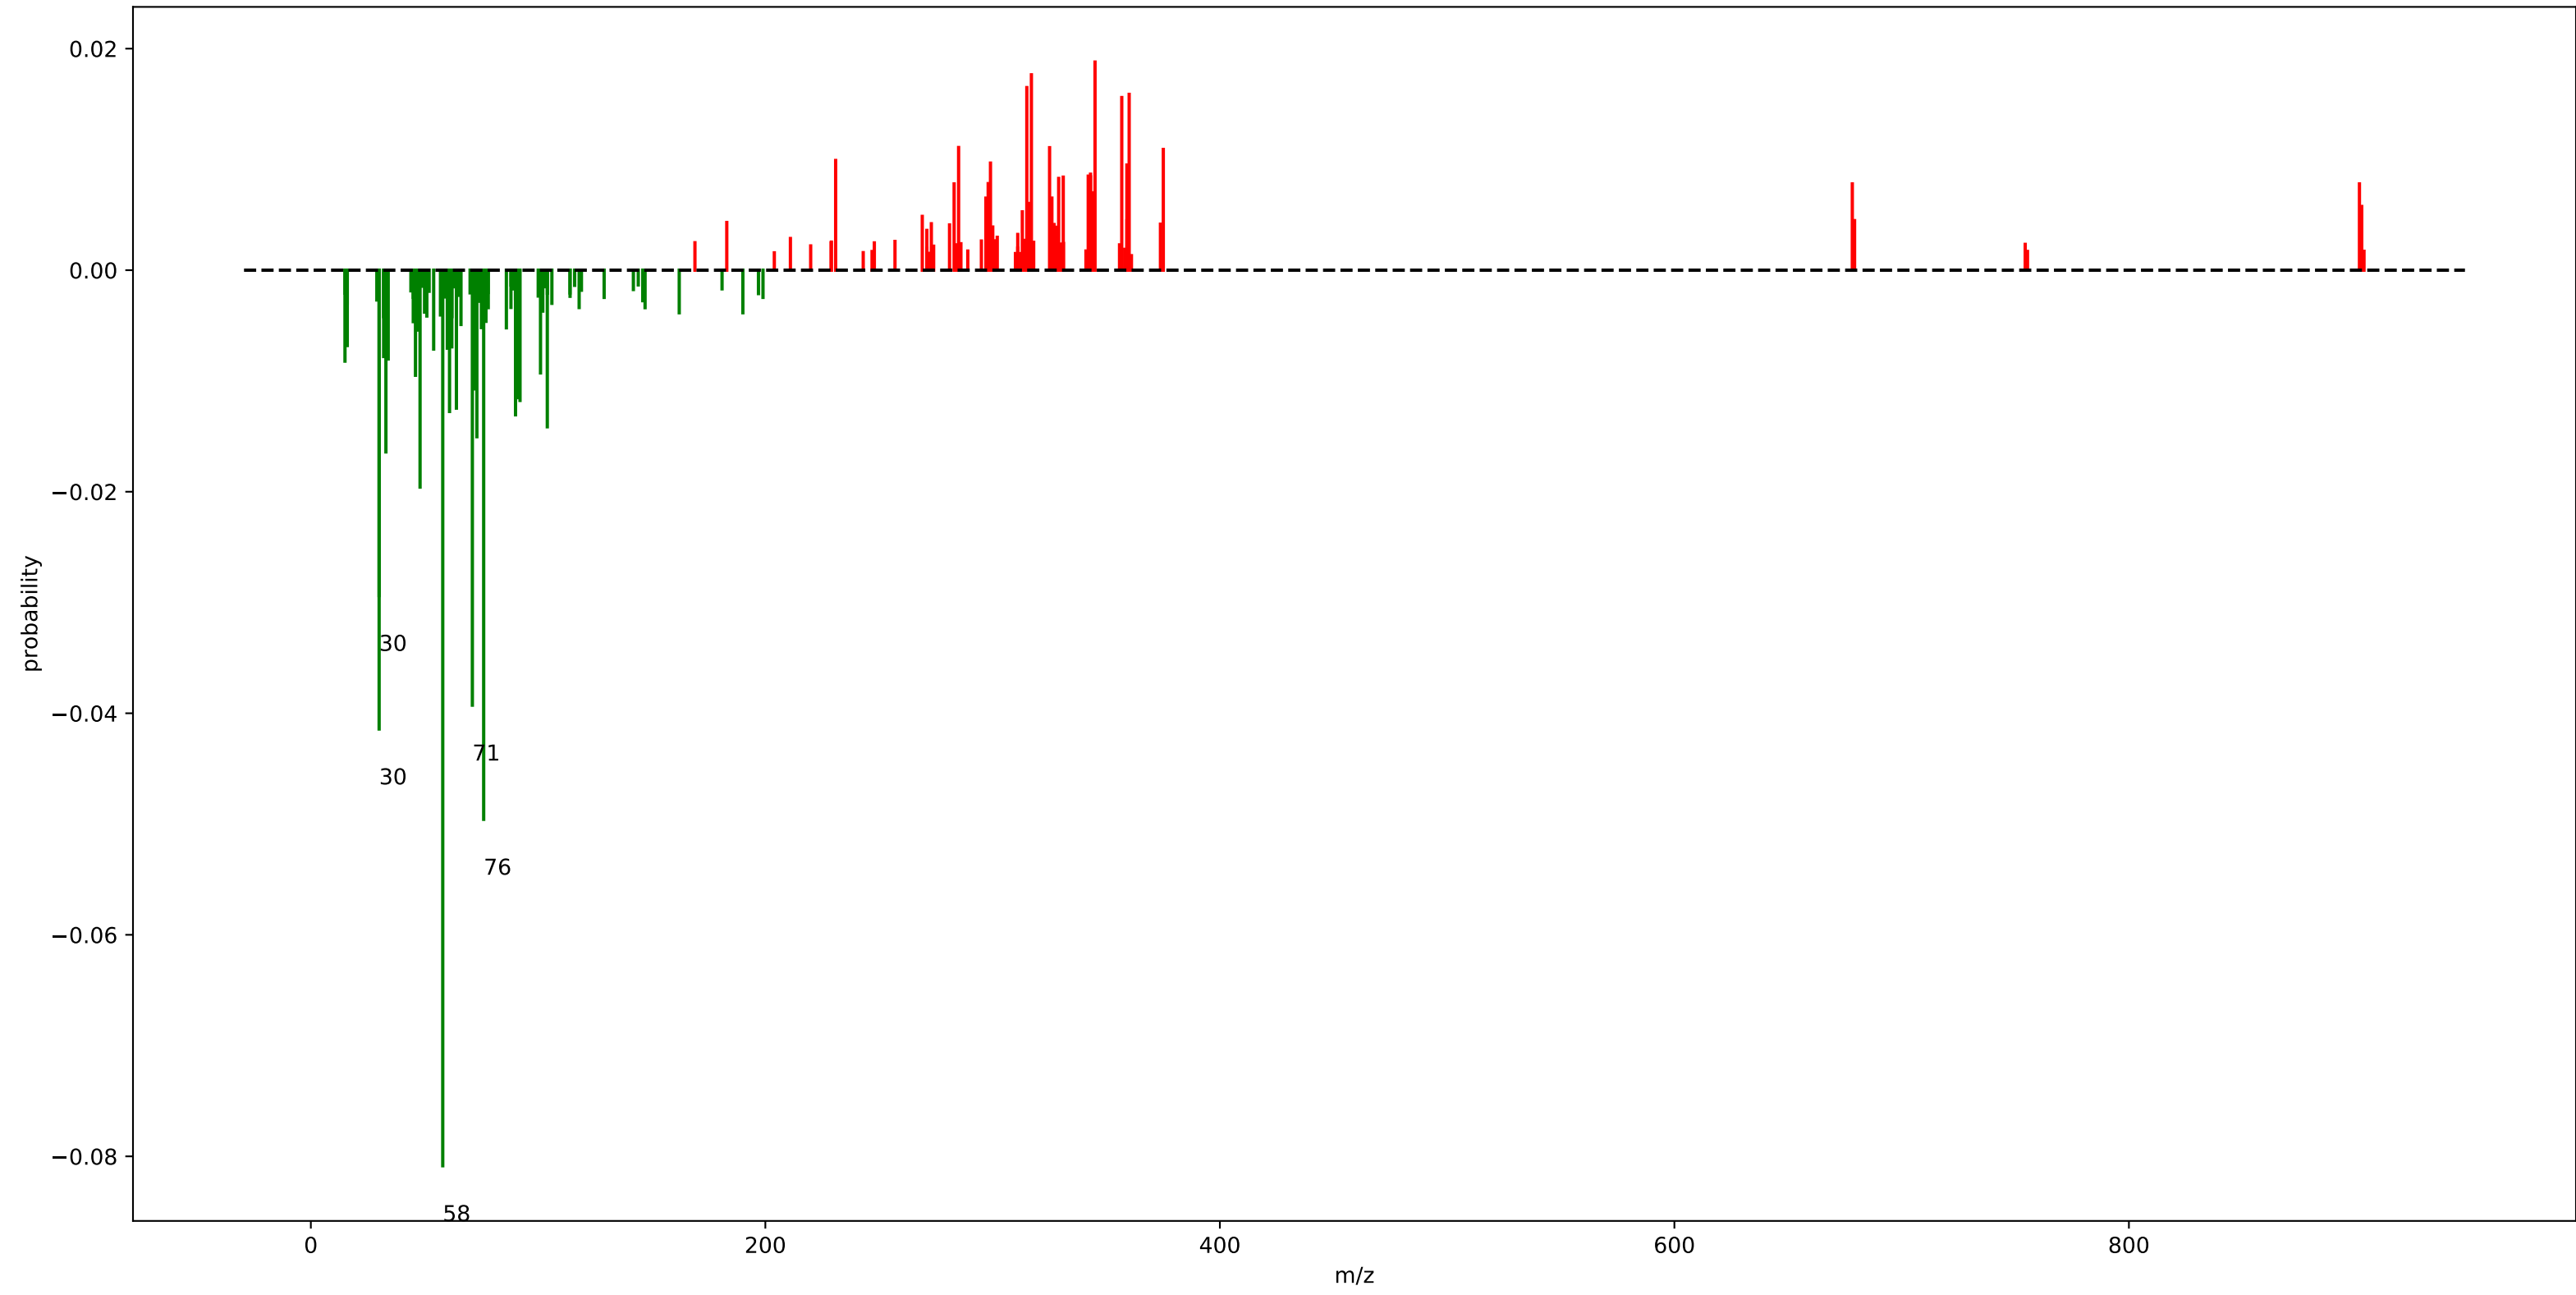

# gnps\_motif\_0.m2m

|                   |        |                   |        |                   |        |
|-------------------|--------|-------------------|--------|-------------------|--------|
| loss_58.0425      | : 0.08 | fragment_325.0675 | : 0.01 | loss_54.0475      | : 0.01 |
| loss_76.0525      | : 0.05 | fragment_375.1075 | : 0.01 | loss_60.0575      | : 0.01 |
| loss_30.0475      | : 0.04 | loss_72.0575      | : 0.01 | fragment_344.0875 | : 0.01 |
| loss_71.0725      | : 0.04 | fragment_230.9325 | : 0.01 | loss_62.0375      | : 0.01 |
| loss_30.0425      | : 0.03 | fragment_299.0575 | : 0.01 | loss_16.0325      | : 0.01 |
| loss_48.0575      | : 0.02 | fragment_359.0775 | : 0.01 | fragment_326.0775 | : 0.01 |
| fragment_345.0625 | : 0.02 | loss_46.0425      | : 0.01 | fragment_297.0425 | : 0.01 |
| fragment_317.0675 | : 0.02 | loss_101.0625     | : 0.01 | fragment_316.0575 | : 0.01 |
| fragment_315.0525 | : 0.02 | fragment_343.0825 | : 0.01 | fragment_902.4475 | : 0.01 |
| loss_33.0325      | : 0.02 | fragment_342.0725 | : 0.01 | loss_47.0525      | : 0.01 |
| fragment_360.0875 | : 0.02 | fragment_343.0775 | : 0.01 | fragment_313.0675 | : 0.01 |
| fragment_356.8275 | : 0.02 | fragment_331.0825 | : 0.01 | loss_86.0375      | : 0.01 |
| loss_73.0625      | : 0.02 | fragment_329.0675 | : 0.01 | fragment_297.0775 | : 0.01 |
| loss_104.0475     | : 0.01 | loss_15.0225      | : 0.01 | loss_75.0475      | : 0.01 |
| loss_90.0675      | : 0.01 | loss_34.0425      | : 0.01 |                   |        |
| loss_61.0275      | : 0.01 | fragment_298.0475 | : 0.01 |                   |        |
| loss_64.0525      | : 0.01 | fragment_678.2875 | : 0.01 |                   |        |
| loss_92.0475      | : 0.01 | loss_32.0375      | : 0.01 |                   |        |
| loss_91.0775      | : 0.01 | fragment_901.4425 | : 0.01 |                   |        |
| fragment_285.0375 | : 0.01 | fragment_283.0625 | : 0.01 |                   |        |



mb\_motif\_150.m2m

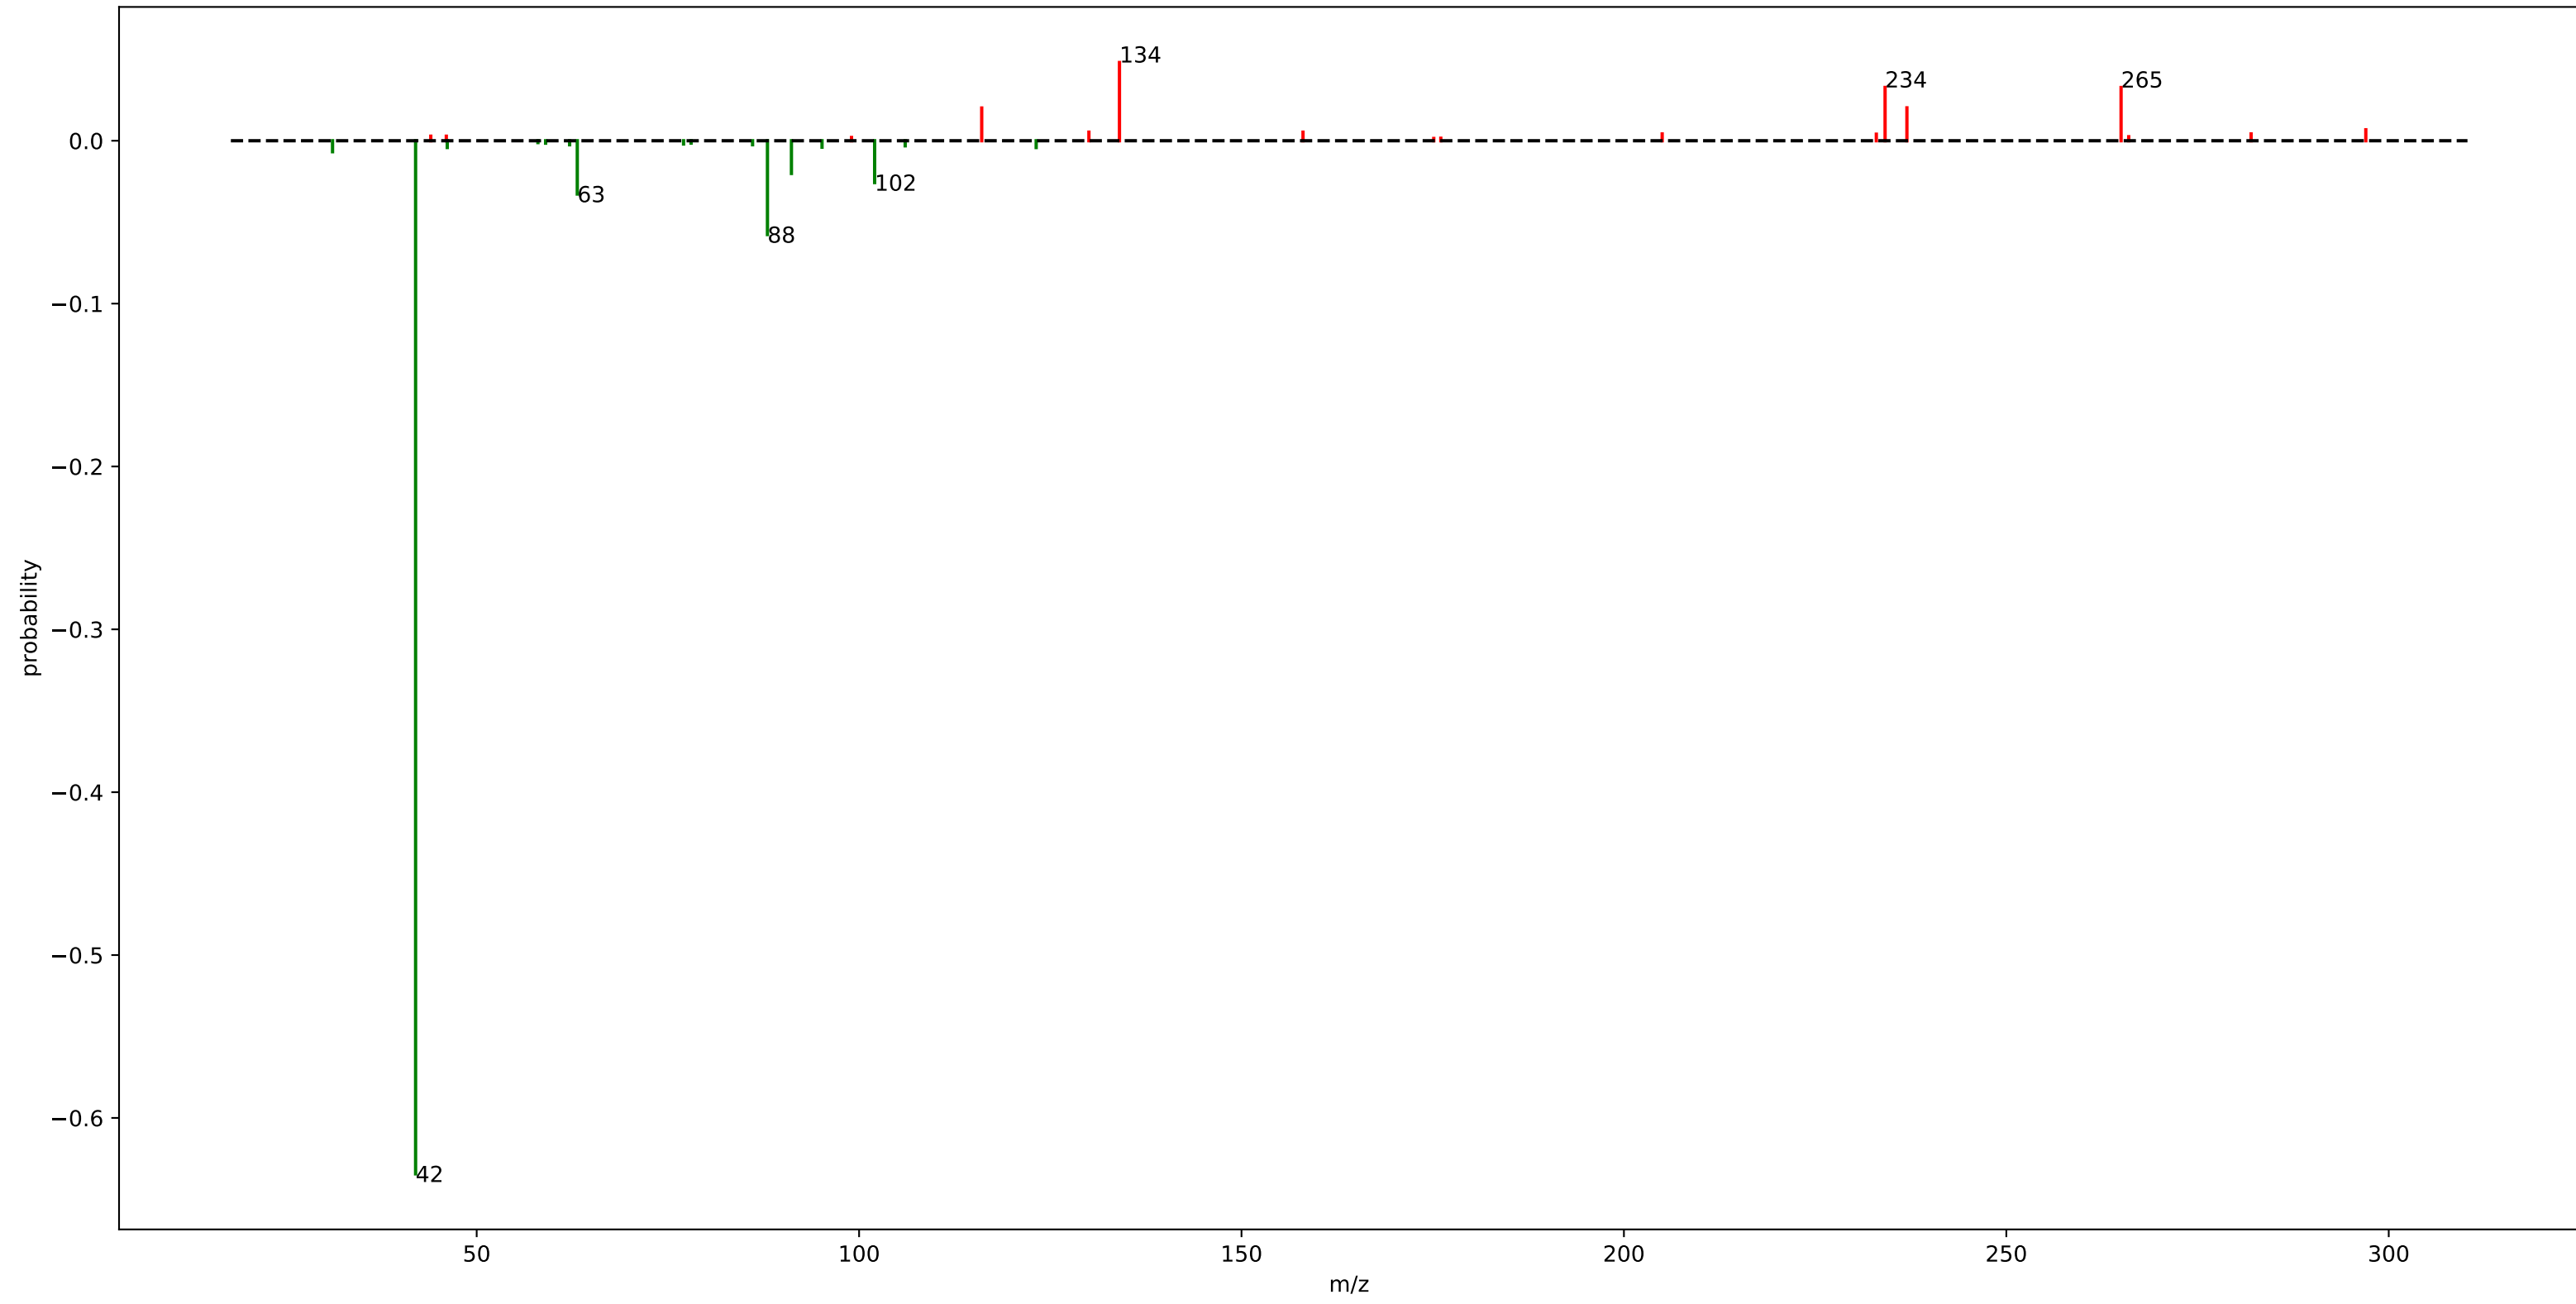

## mb\_motif\_150.m2m

|                   |        |
|-------------------|--------|
| loss_42.0125      | : 0.63 |
| loss_88.0175      | : 0.06 |
| fragment_134.0425 | : 0.05 |
| fragment_234.1475 | : 0.03 |
| loss_63.1525      | : 0.03 |
| fragment_265.0025 | : 0.03 |
| loss_102.0325     | : 0.03 |
| fragment_237.0025 | : 0.02 |
| fragment_116.0325 | : 0.02 |
| loss_91.1525      | : 0.02 |
| loss_31.1525      | : 0.01 |
| fragment_297.0025 | : 0.01 |
| fragment_130.0475 | : 0.01 |
| fragment_158.0425 | : 0.01 |

motif\_466

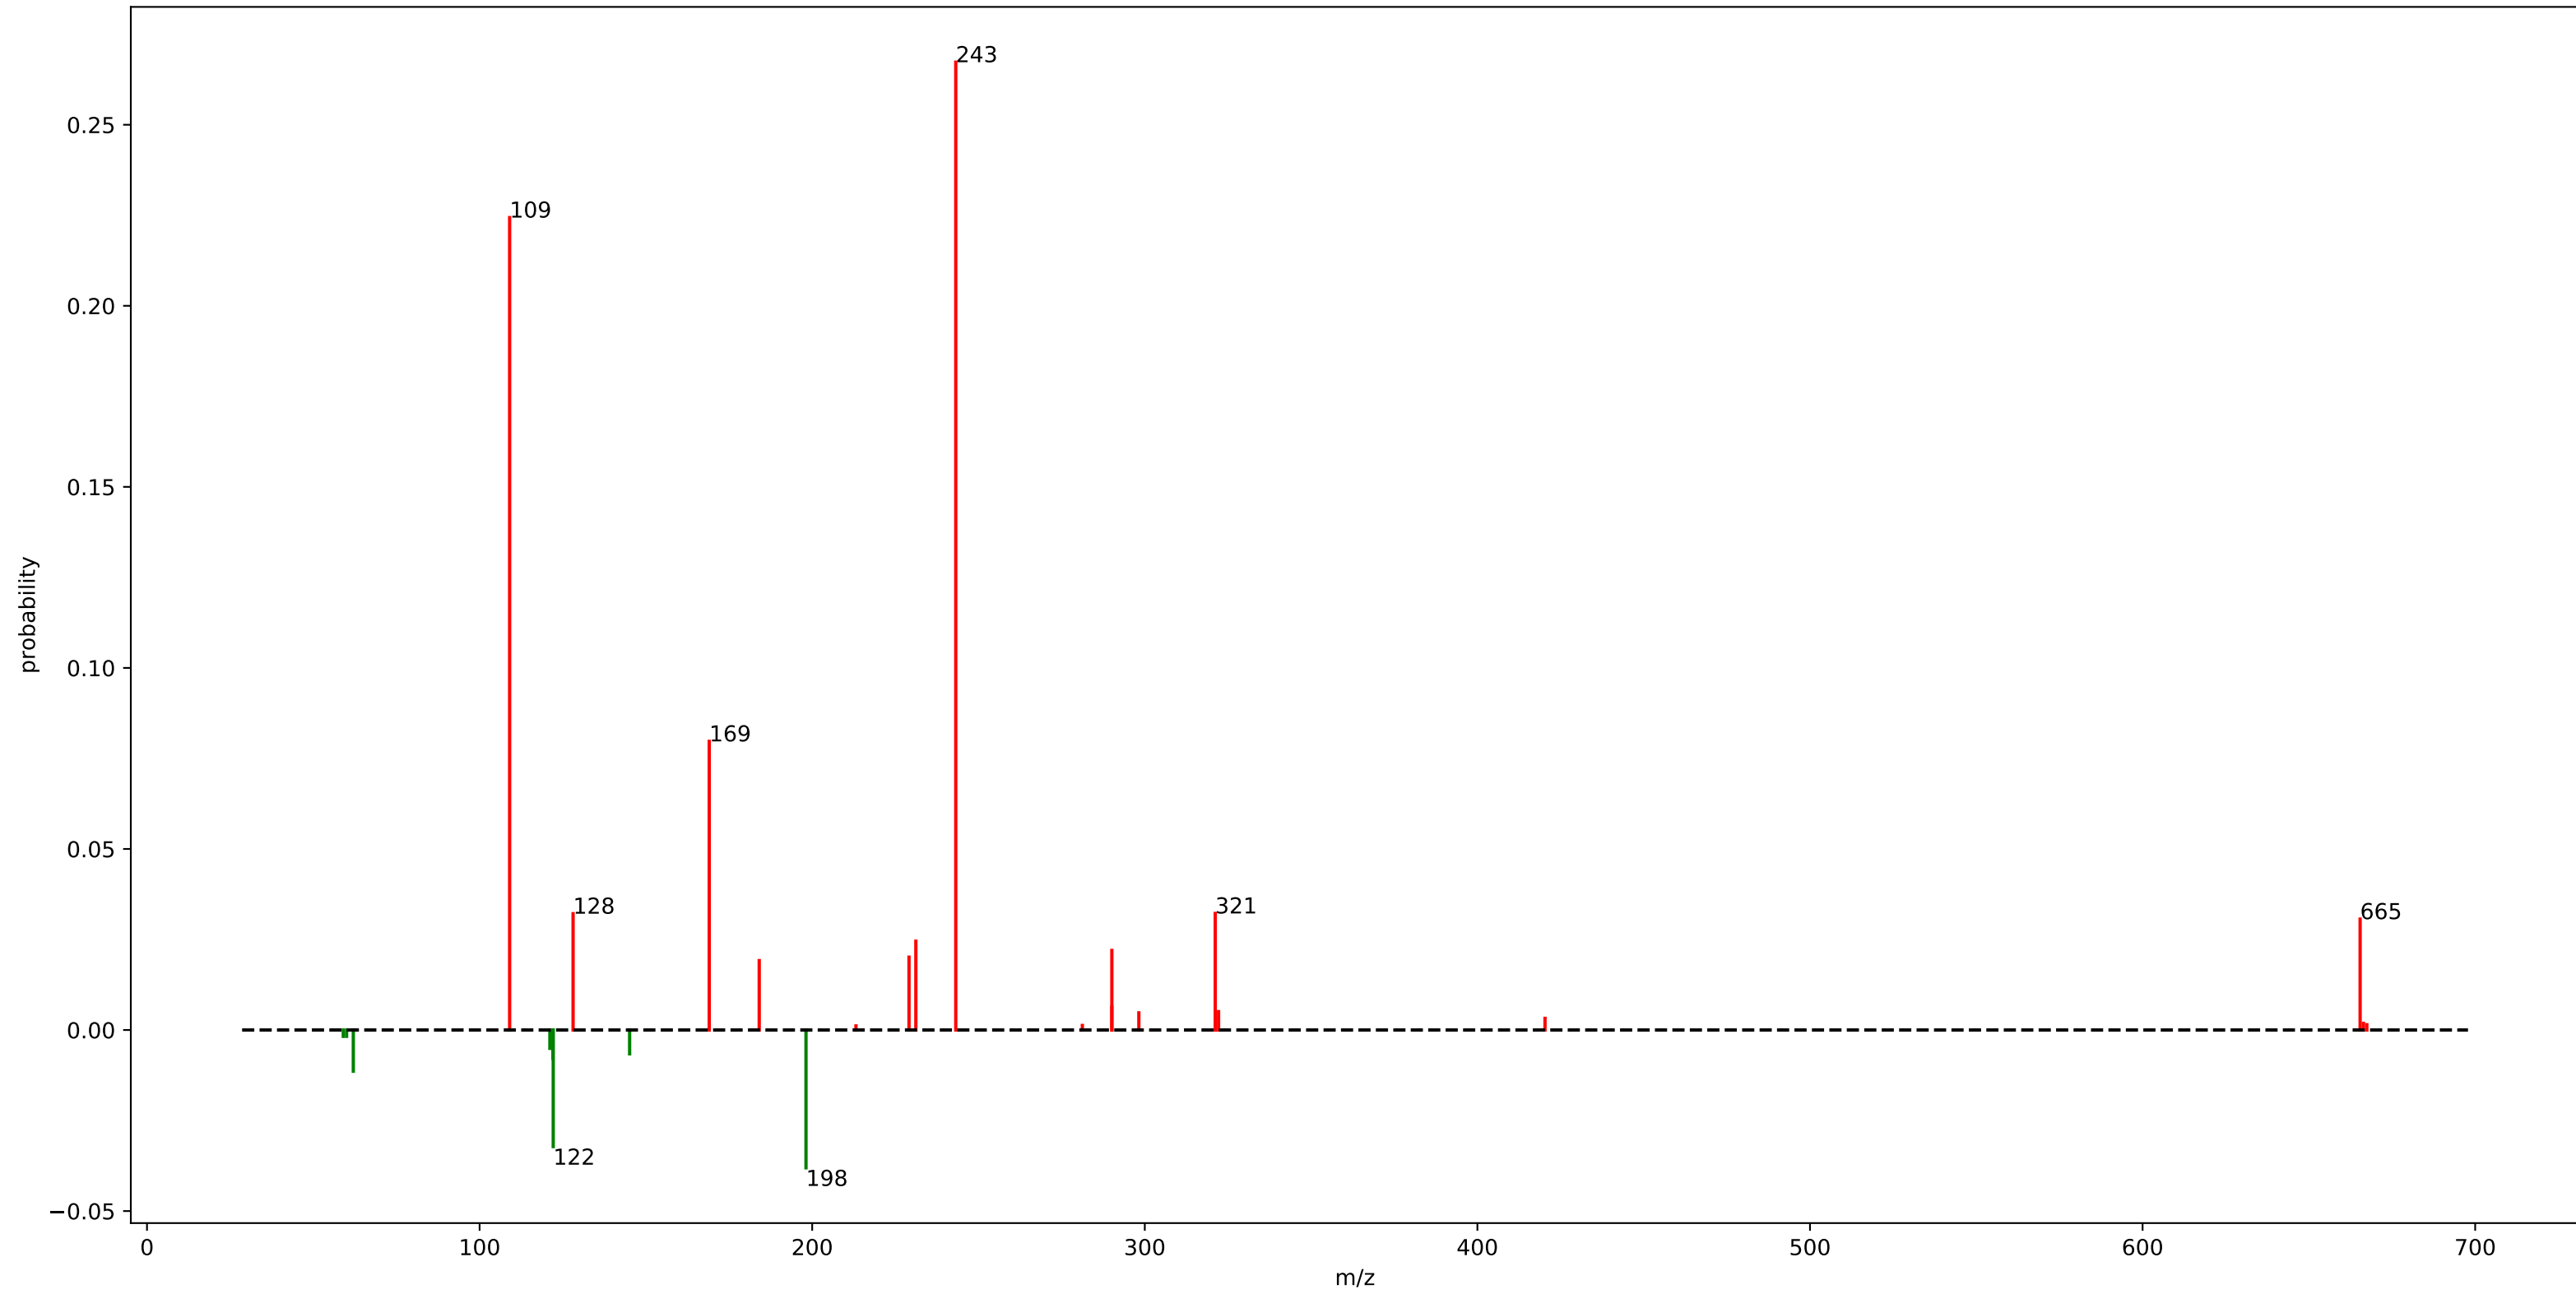

## motif\_466

|                   |        |
|-------------------|--------|
| fragment_243.1675 | : 0.27 |
| fragment_109.0325 | : 0.22 |
| fragment_169.0475 | : 0.08 |
| loss_198.1375     | : 0.04 |
| fragment_321.1825 | : 0.03 |
| loss_122.1375     | : 0.03 |
| fragment_128.1075 | : 0.03 |
| fragment_665.4025 | : 0.03 |
| fragment_231.1675 | : 0.02 |
| fragment_290.0975 | : 0.02 |
| fragment_229.1075 | : 0.02 |
| fragment_184.0725 | : 0.02 |
| loss_62.0325      | : 0.01 |
| loss_122.0575     | : 0.01 |
| loss_145.1075     | : 0.01 |
| fragment_290.0925 | : 0.01 |
| fragment_322.1825 | : 0.01 |
| loss_121.1375     | : 0.01 |

motif\_609



motif\_609

motif\_608

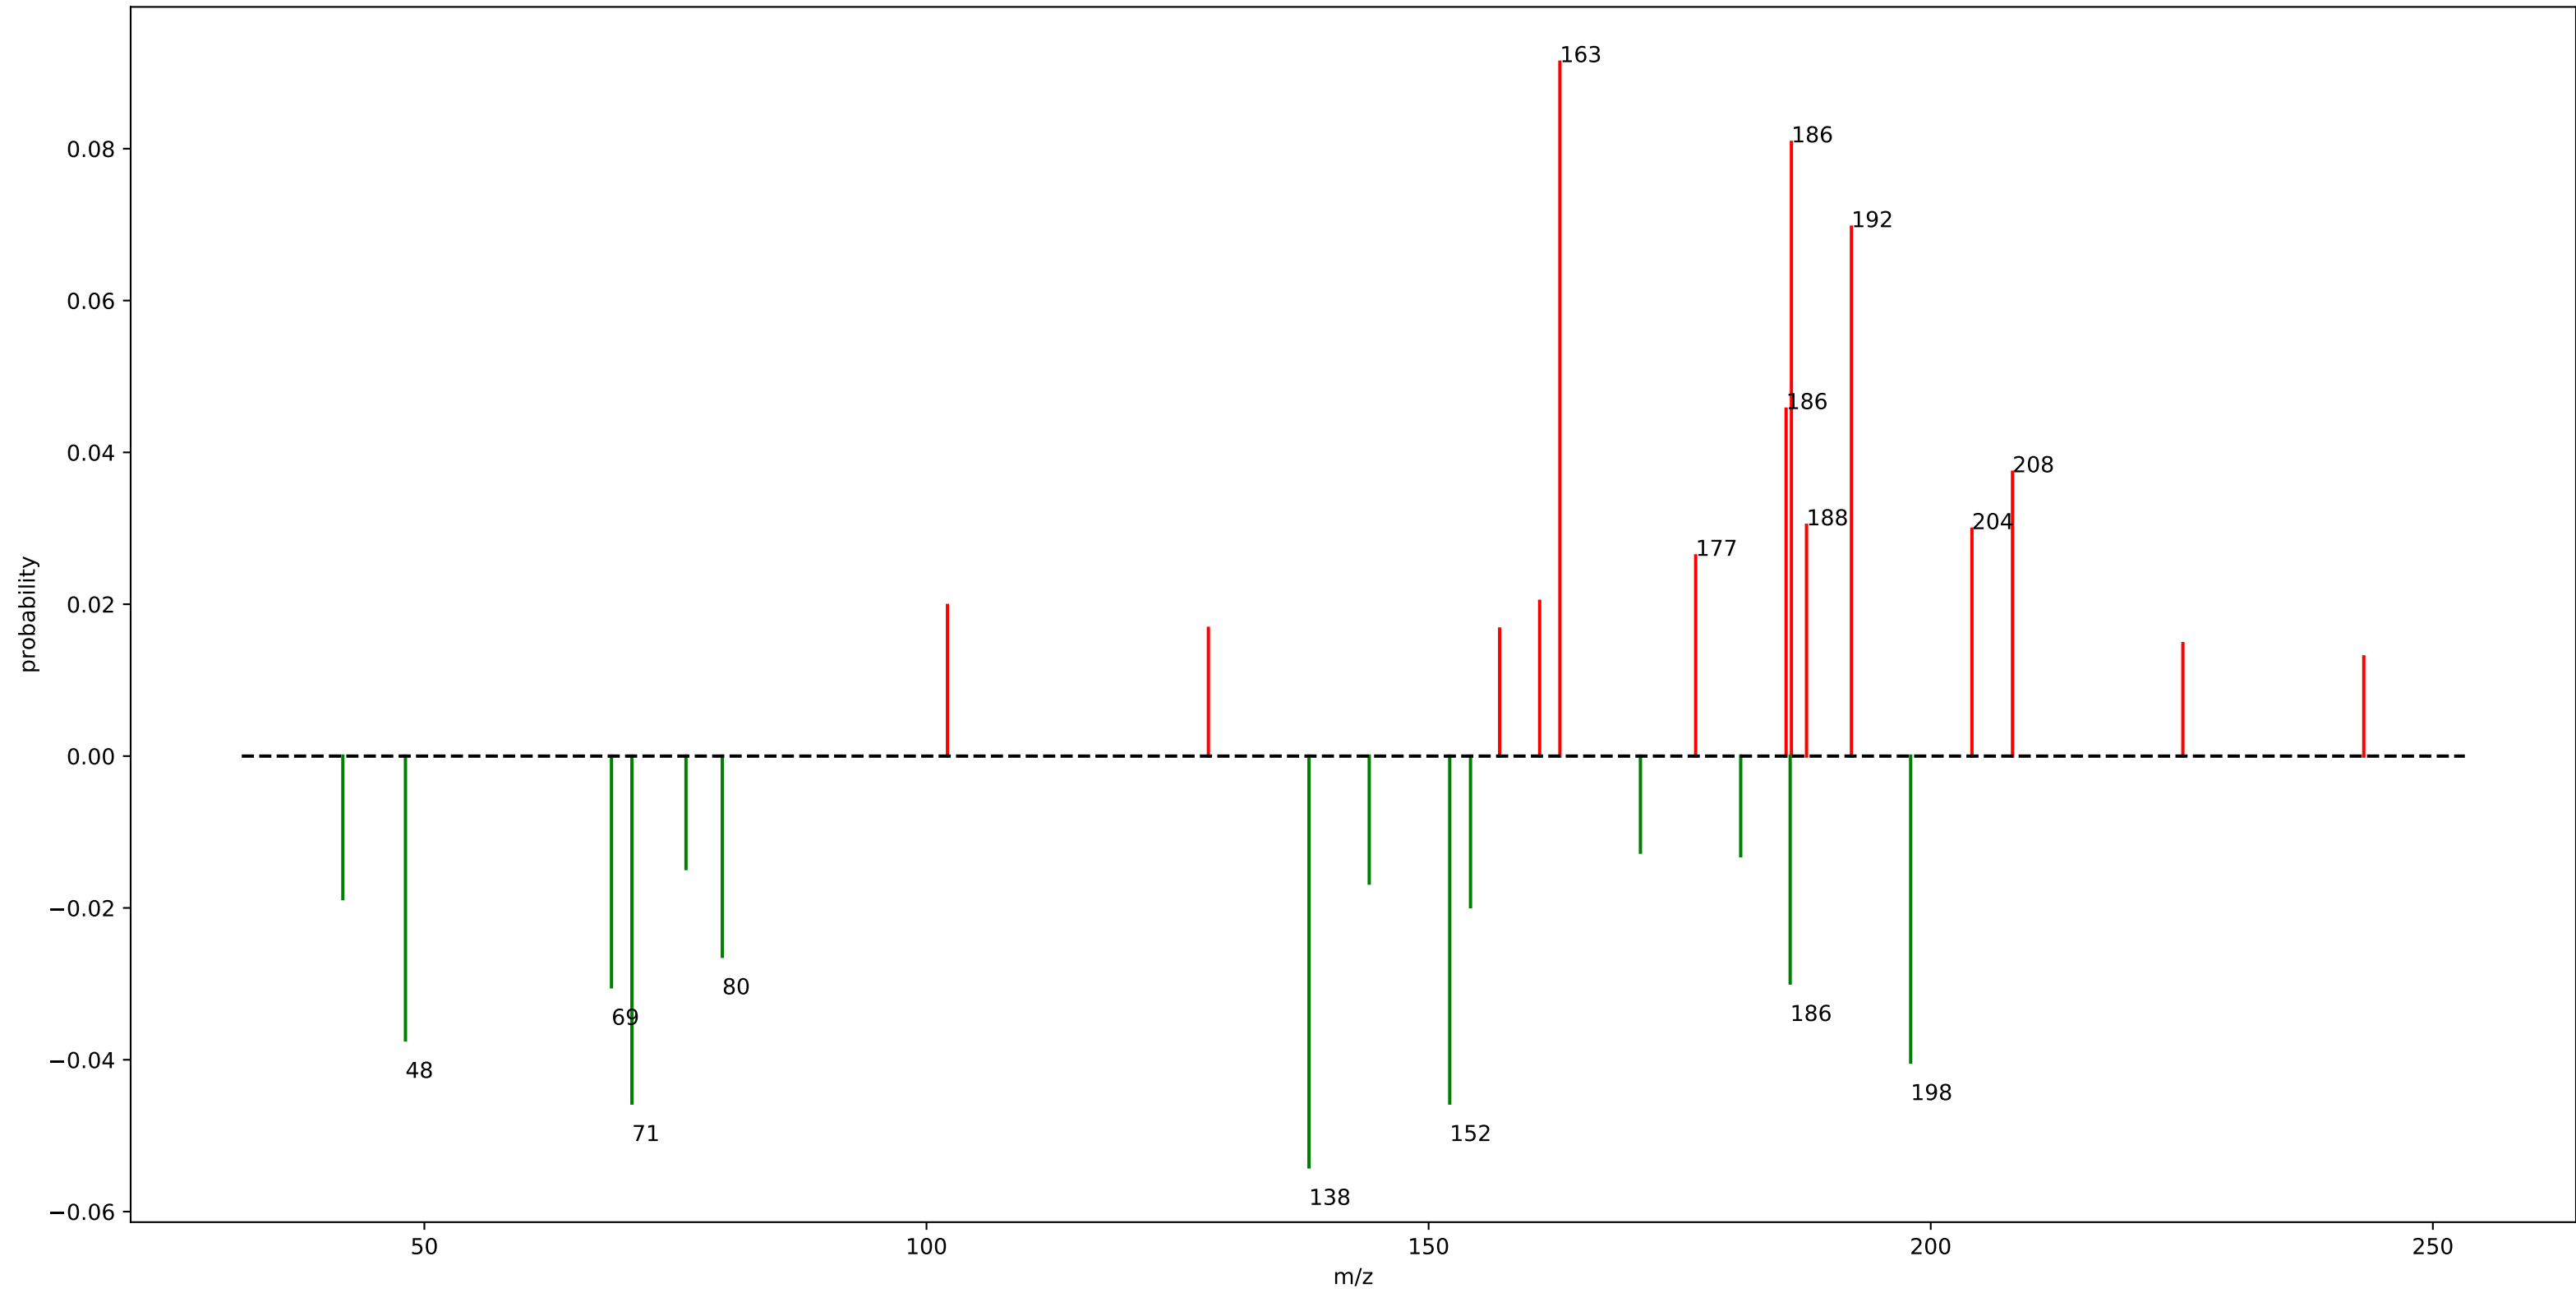

## motif\_608

|                   |        |                   |        |
|-------------------|--------|-------------------|--------|
| fragment_163.0725 | : 0.09 | fragment_128.0725 | : 0.02 |
| fragment_186.1275 | : 0.08 | fragment_157.0725 | : 0.02 |
| fragment_192.1025 | : 0.07 | loss_144.0875     | : 0.02 |
| loss_138.0875     | : 0.05 | fragment_225.1075 | : 0.01 |
| fragment_185.5975 | : 0.05 | loss_76.0525      | : 0.01 |
| loss_70.6675      | : 0.05 | loss_181.0775     | : 0.01 |
| loss_152.1025     | : 0.05 | fragment_243.1225 | : 0.01 |
| loss_198.0025     | : 0.04 | loss_171.0925     | : 0.01 |
| fragment_208.1425 | : 0.04 |                   |        |
| loss_48.1175      | : 0.04 |                   |        |
| loss_68.6325      | : 0.03 |                   |        |
| fragment_187.6325 | : 0.03 |                   |        |
| loss_186.0025     | : 0.03 |                   |        |
| fragment_204.1025 | : 0.03 |                   |        |
| loss_79.6675      | : 0.03 |                   |        |
| fragment_176.5925 | : 0.03 |                   |        |
| fragment_161.0575 | : 0.02 |                   |        |
| loss_154.1725     | : 0.02 |                   |        |
| fragment_102.0875 | : 0.02 |                   |        |
| loss_41.8825      | : 0.02 |                   |        |



euphorbia\_motif\_427.m2m

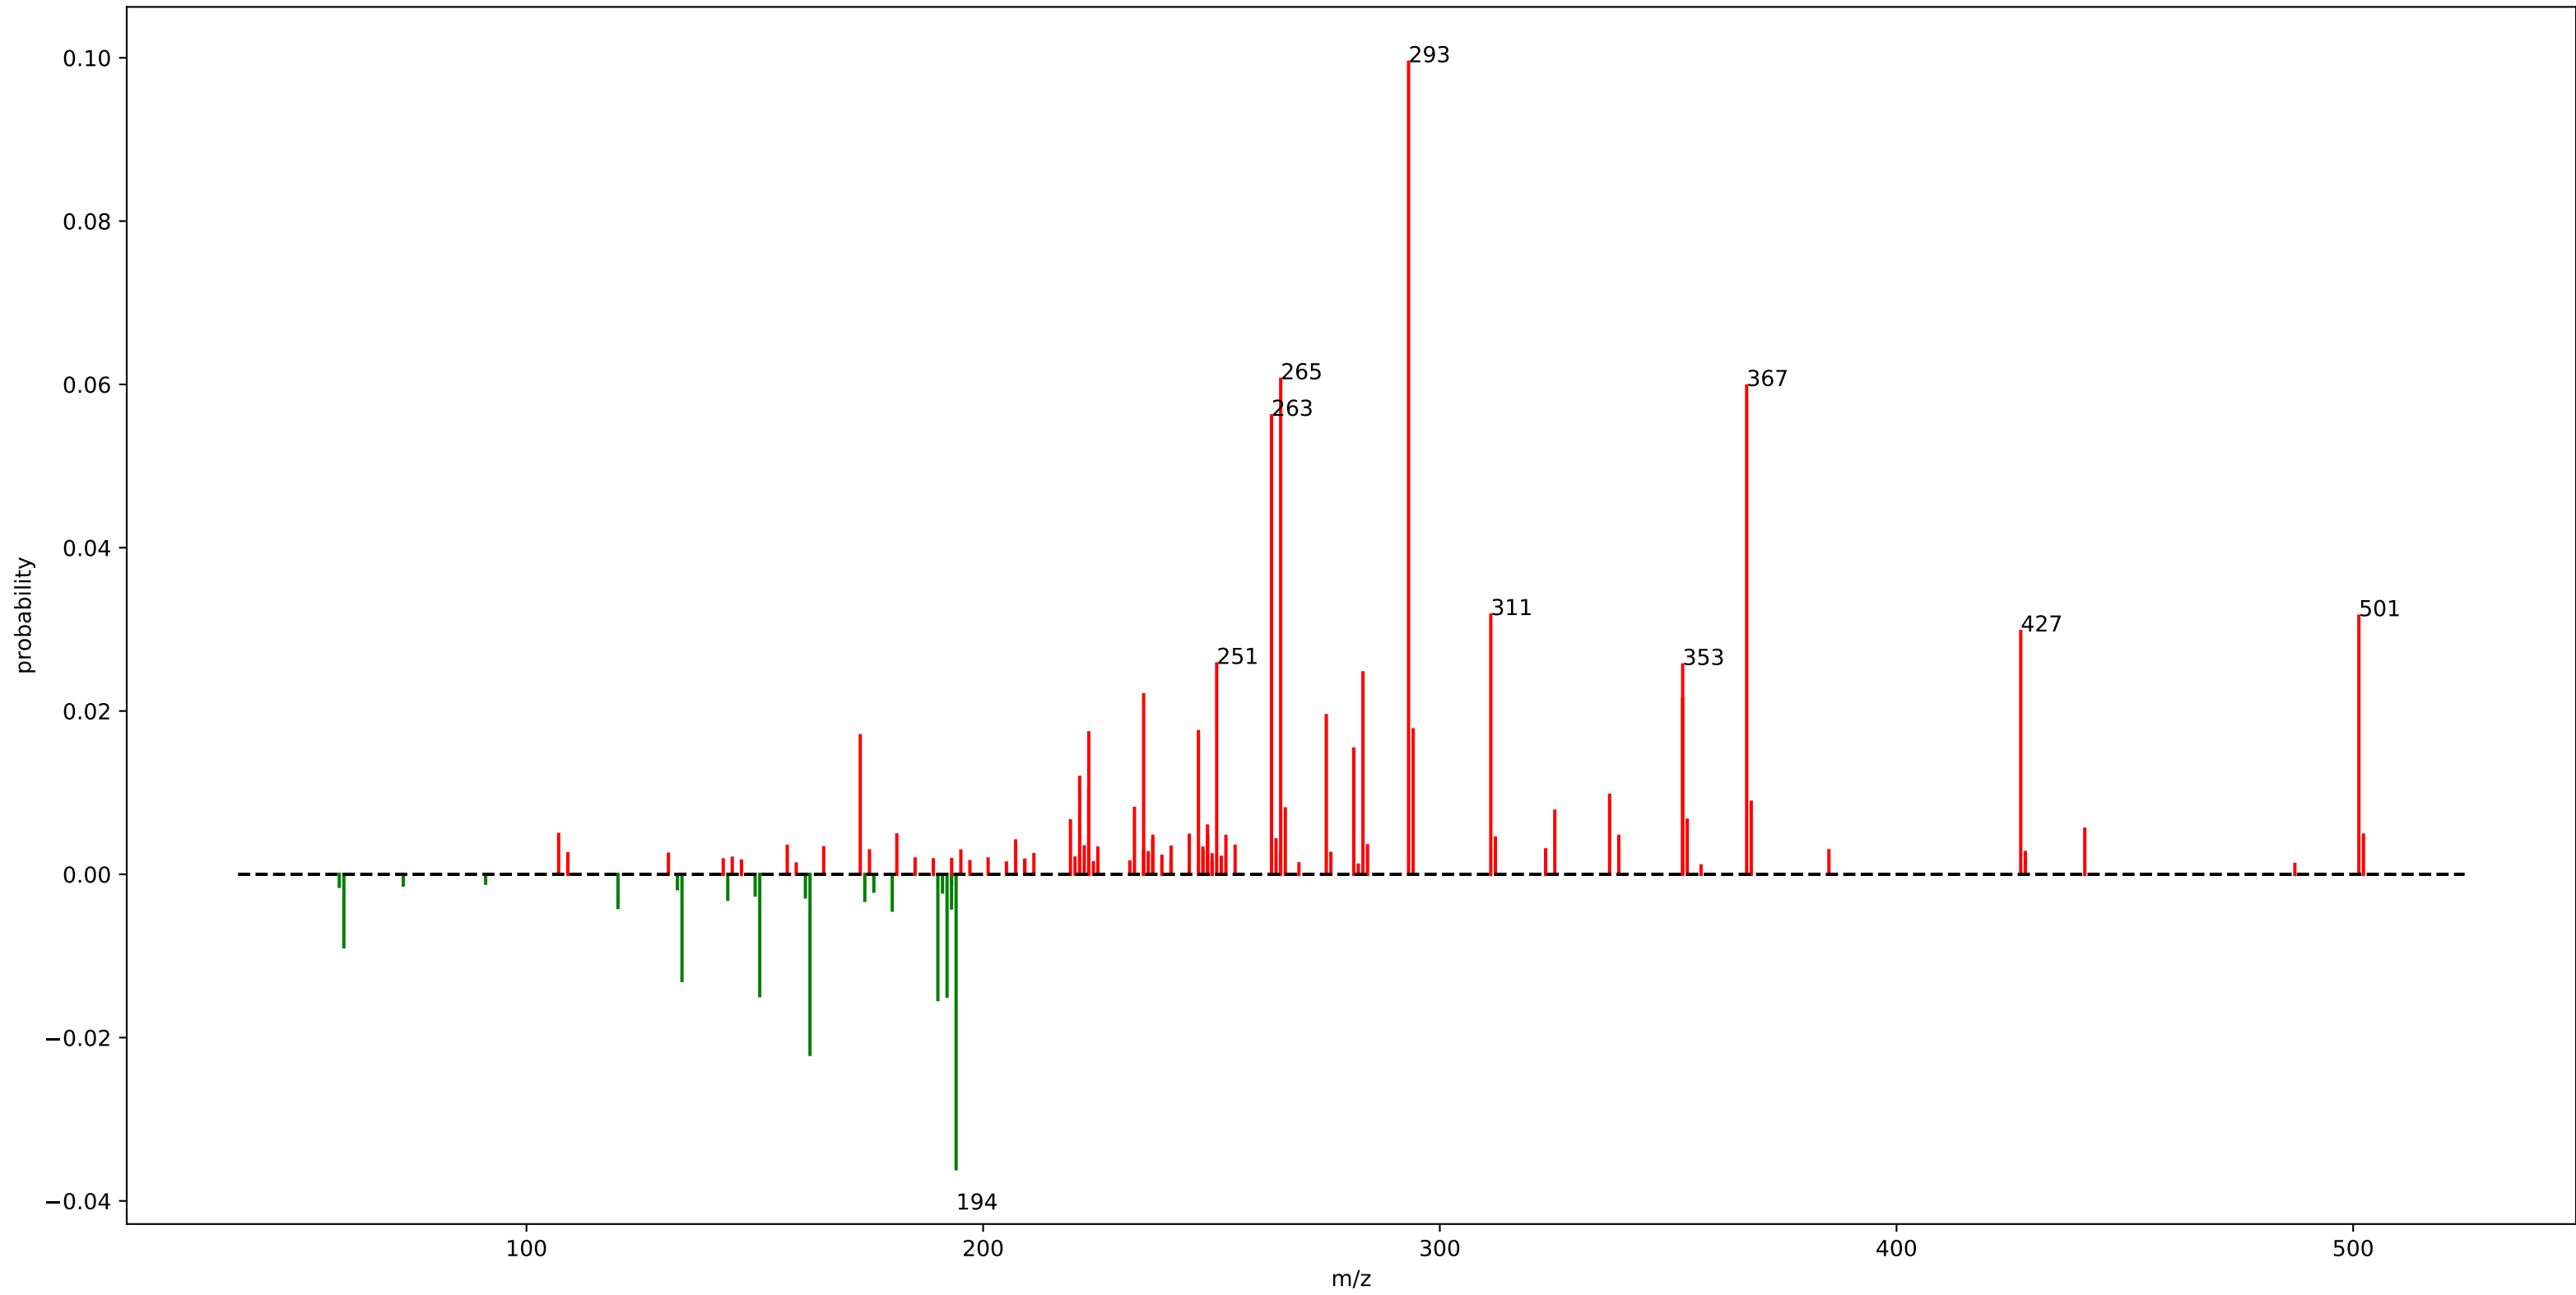

# euphorbia\_motif\_427.m2m

|                   |        |                   |        |
|-------------------|--------|-------------------|--------|
| fragment_293.1575 | : 0.10 | loss_190.0825     | : 0.02 |
| fragment_265.1575 | : 0.06 | loss_192.0975     | : 0.01 |
| fragment_367.1925 | : 0.06 | loss_151.0825     | : 0.01 |
| fragment_263.1425 | : 0.06 | loss_134.0575     | : 0.01 |
| loss_194.0775     | : 0.04 | fragment_221.1325 | : 0.01 |
| fragment_311.1625 | : 0.03 | fragment_223.1125 | : 0.01 |
| fragment_501.2475 | : 0.03 | fragment_337.1775 | : 0.01 |
| fragment_427.2125 | : 0.03 | loss_60.0175      | : 0.01 |
| fragment_251.1425 | : 0.03 | fragment_368.1925 | : 0.01 |
| fragment_353.1775 | : 0.03 | fragment_233.1325 | : 0.01 |
| fragment_283.1675 | : 0.02 | fragment_266.1625 | : 0.01 |
| loss_162.0875     | : 0.02 | fragment_325.1825 | : 0.01 |
| fragment_235.1475 | : 0.02 | fragment_354.1775 | : 0.01 |
| fragment_353.1725 | : 0.02 | fragment_219.1175 | : 0.01 |
| fragment_275.1425 | : 0.02 | fragment_249.1275 | : 0.01 |
| fragment_294.1575 | : 0.02 | fragment_441.2275 | : 0.01 |
| fragment_247.1475 | : 0.02 |                   |        |
| fragment_223.1475 | : 0.02 |                   |        |
| fragment_173.0975 | : 0.02 |                   |        |
| fragment_281.1525 | : 0.02 |                   |        |

urine\_mass2motif\_43.m2m

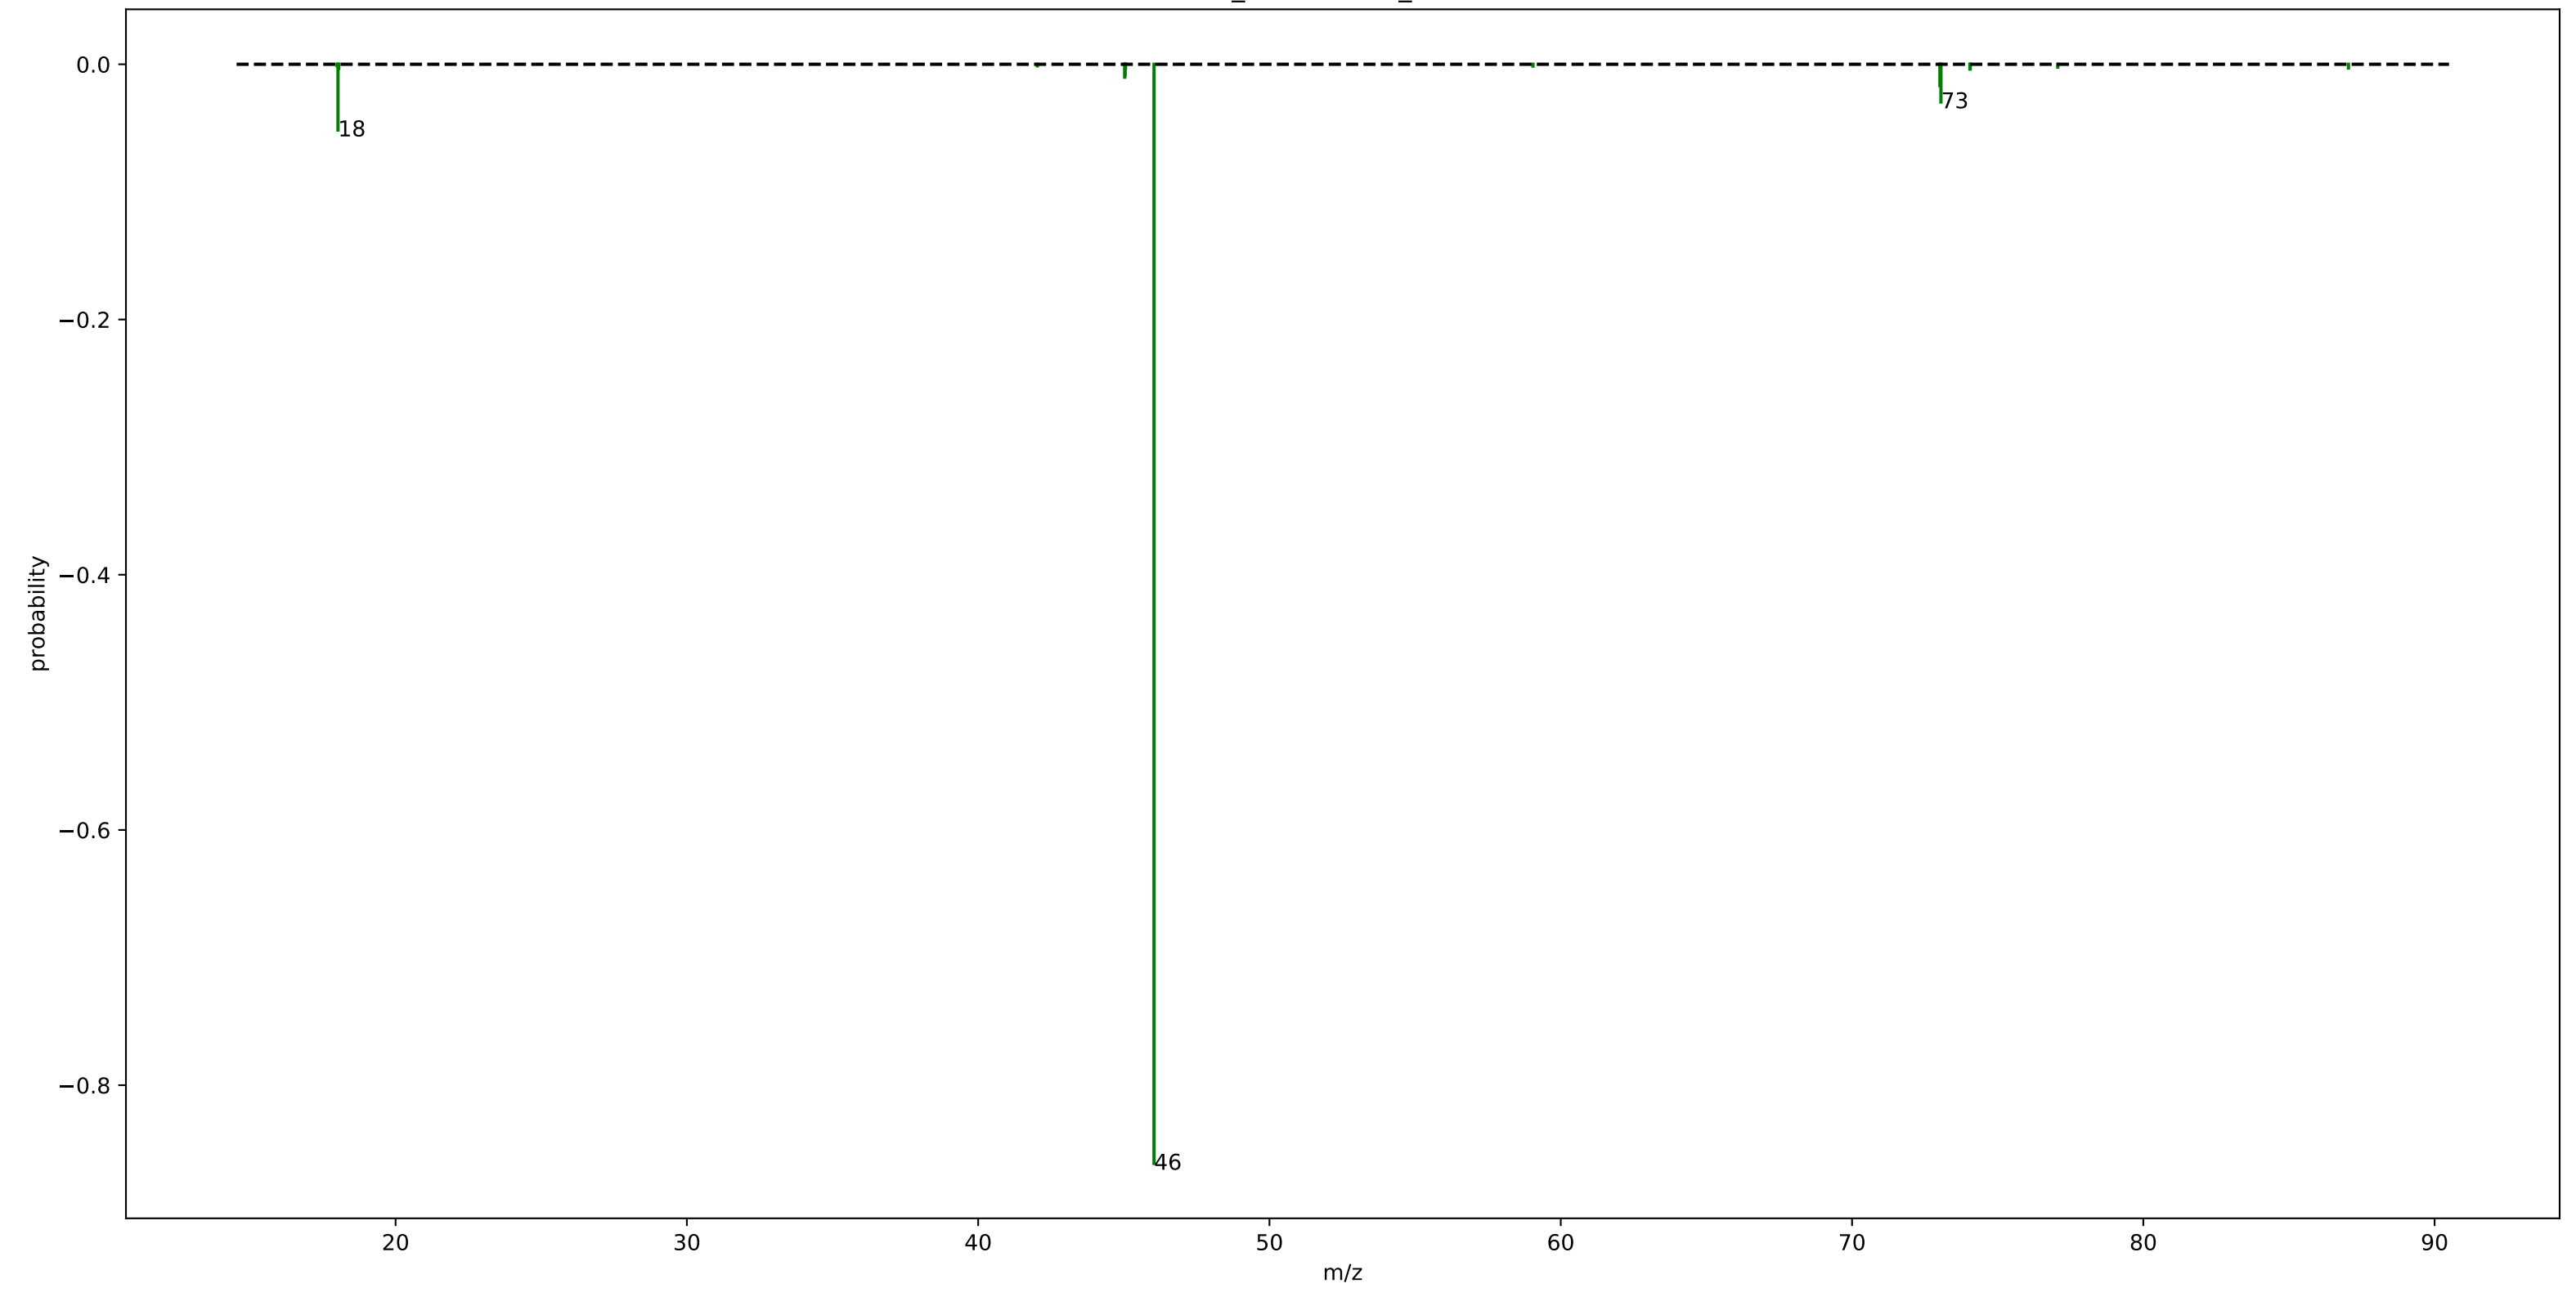

## urine\_mass2motif\_43.m2m

|              |        |
|--------------|--------|
| loss_46.0375 | : 0.86 |
| loss_18.0225 | : 0.05 |
| loss_73.0525 | : 0.03 |
| loss_73.0175 | : 0.02 |
| loss_45.0325 | : 0.01 |
| loss_45.0425 | : 0.01 |

motif\_603

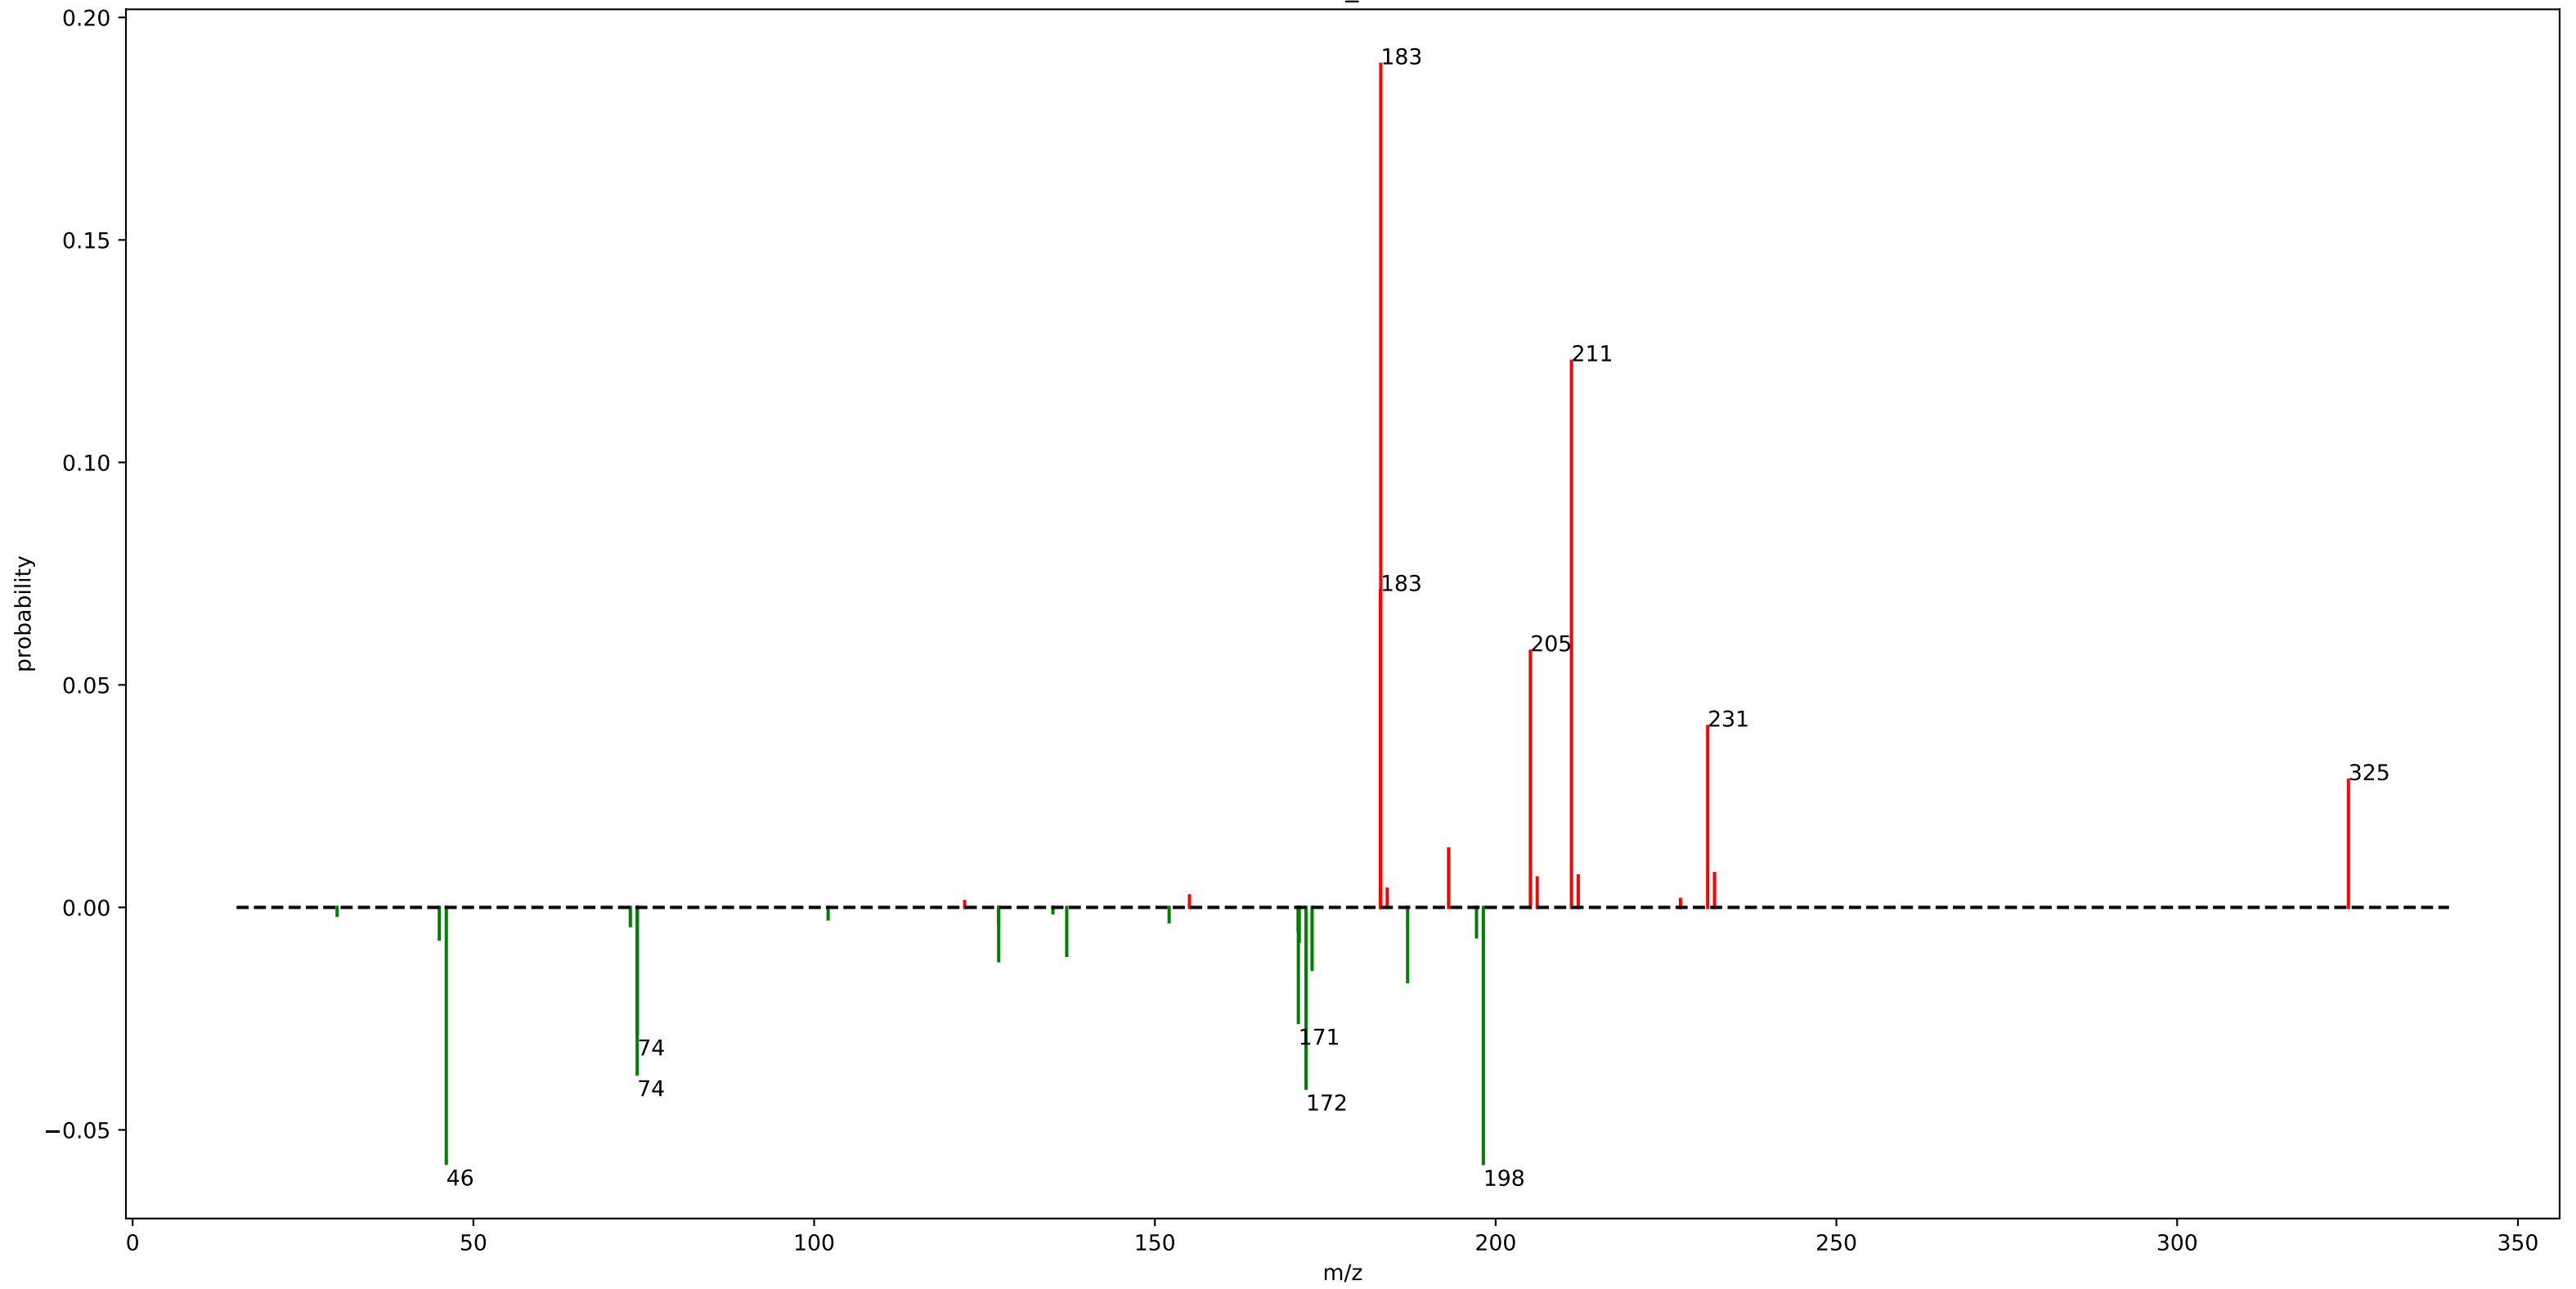

## motif\_603

|                   |        |                   |        |
|-------------------|--------|-------------------|--------|
| fragment_183.1475 | : 0.19 | loss_45.0025      | : 0.01 |
| fragment_211.1225 | : 0.12 | loss_197.1925     | : 0.01 |
| fragment_183.0925 | : 0.07 | fragment_206.0975 | : 0.01 |
| loss_198.1975     | : 0.06 | loss_171.0325     | : 0.01 |
| fragment_205.0975 | : 0.06 |                   |        |
| loss_46.0275      | : 0.06 |                   |        |
| loss_172.1775     | : 0.04 |                   |        |
| fragment_231.1125 | : 0.04 |                   |        |
| loss_74.0375      | : 0.04 |                   |        |
| fragment_325.1375 | : 0.03 |                   |        |
| loss_74.0575      | : 0.03 |                   |        |
| loss_171.0525     | : 0.03 |                   |        |
| loss_187.0825     | : 0.02 |                   |        |
| loss_173.0675     | : 0.01 |                   |        |
| fragment_193.0975 | : 0.01 |                   |        |
| loss_127.0825     | : 0.01 |                   |        |
| loss_137.0675     | : 0.01 |                   |        |
| loss_171.1775     | : 0.01 |                   |        |
| fragment_232.1175 | : 0.01 |                   |        |
| fragment_212.1275 | : 0.01 |                   |        |

motif\_602

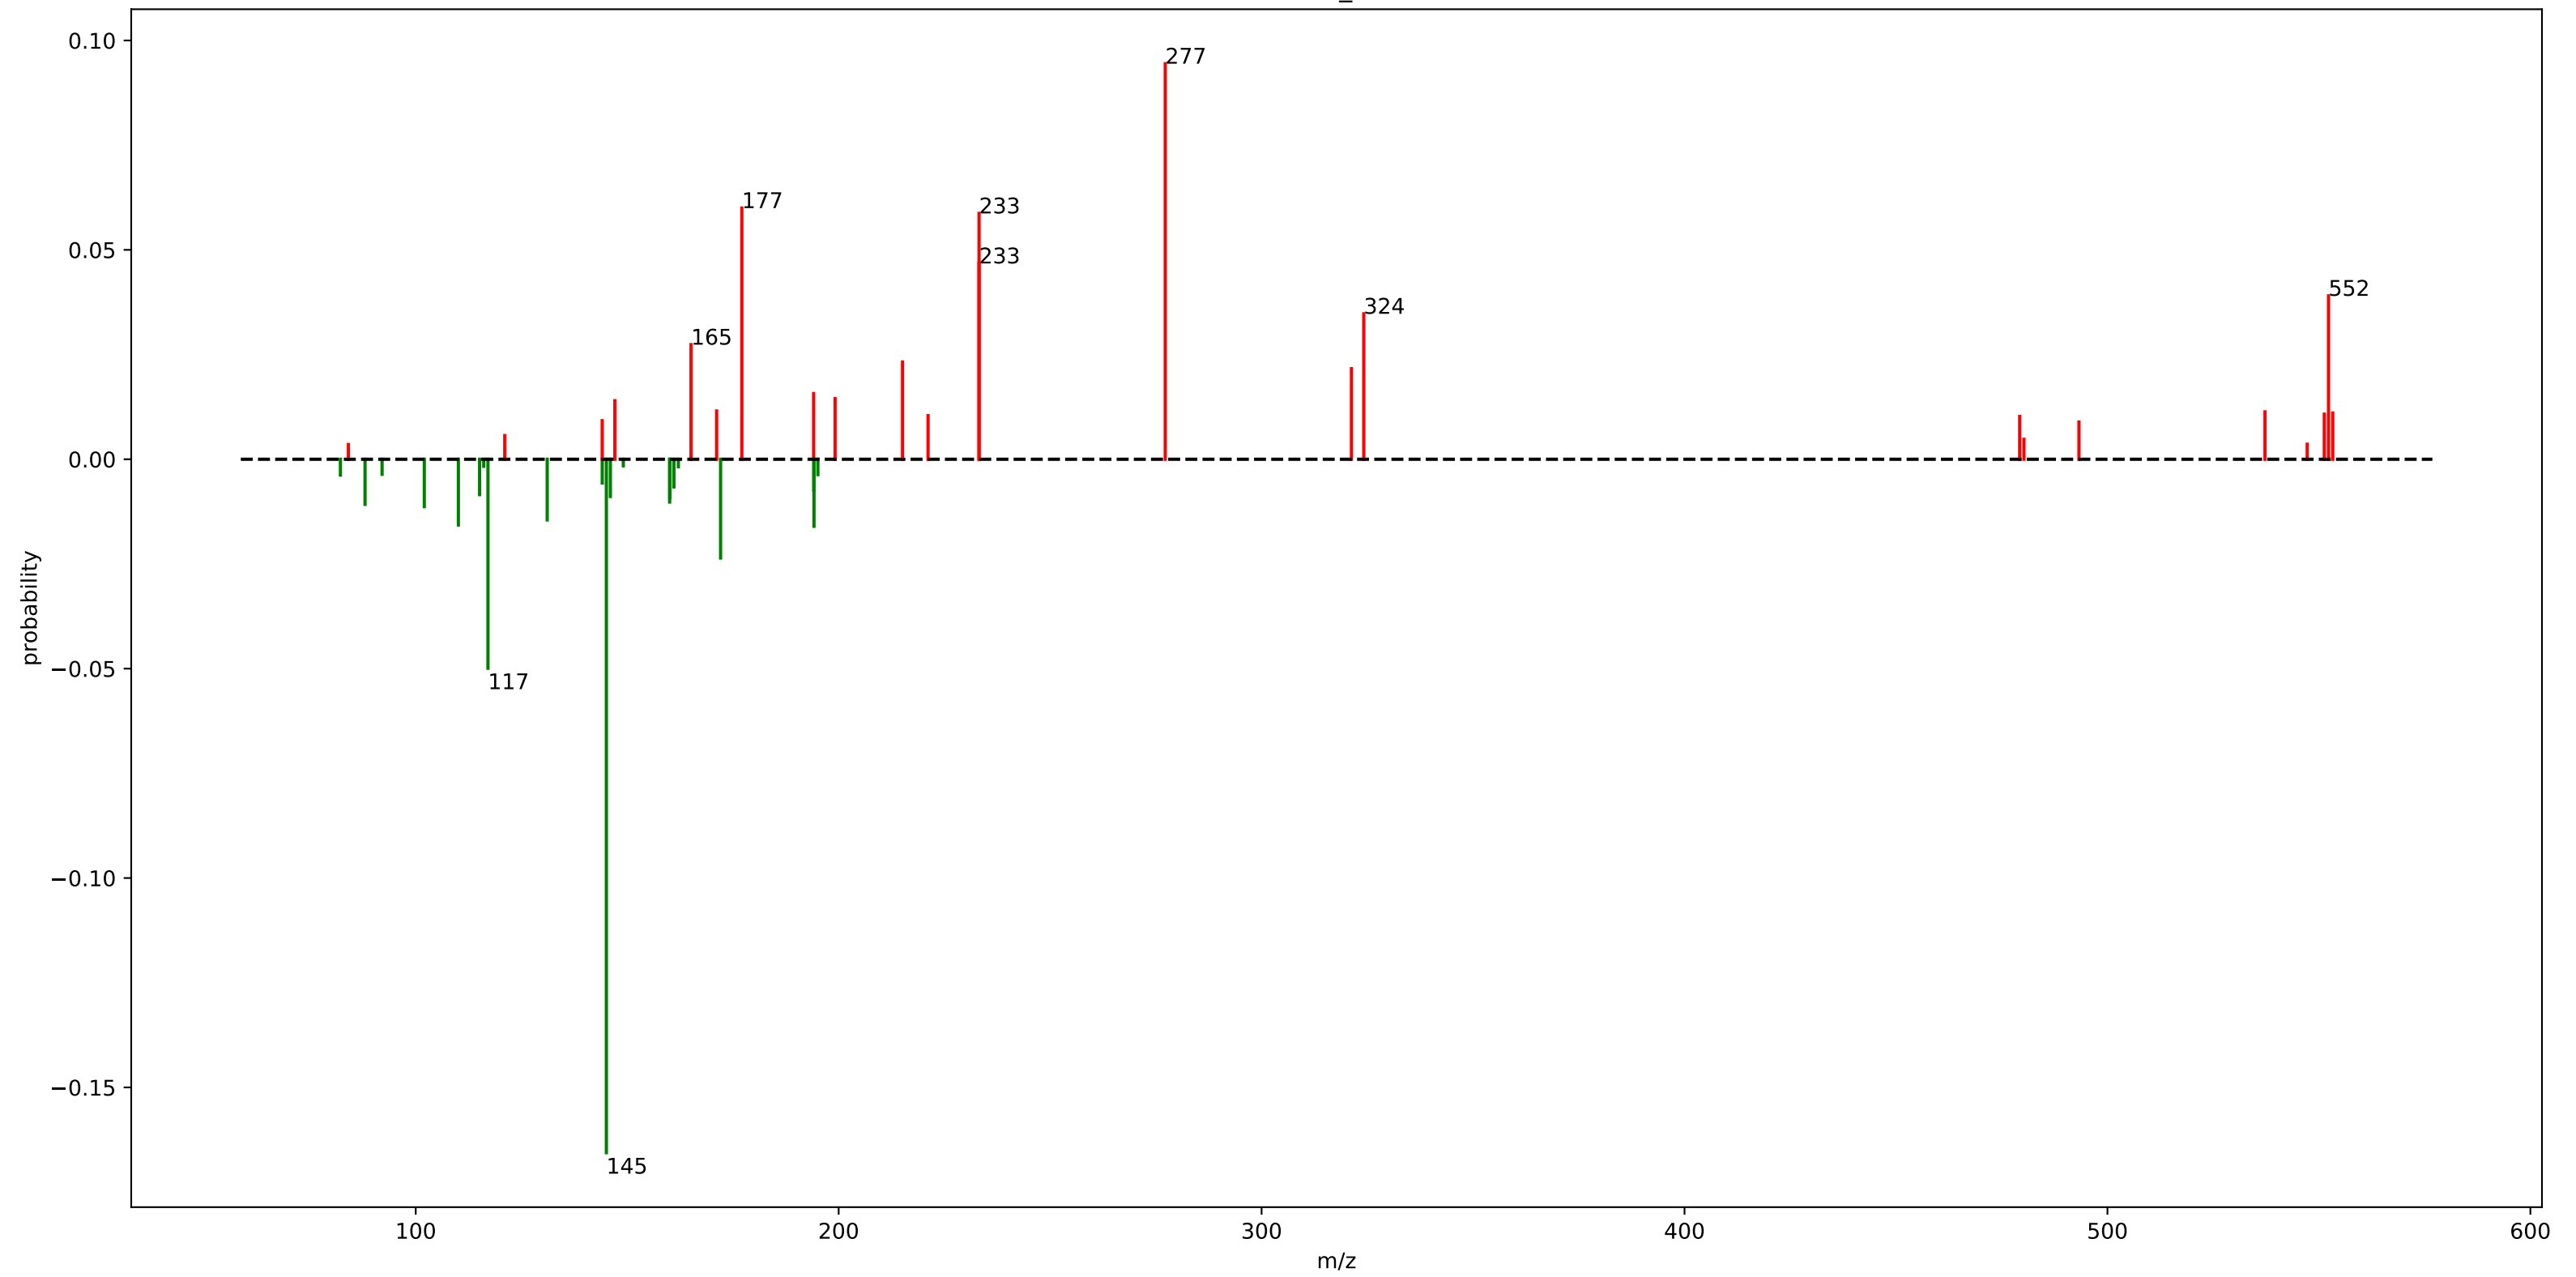

## motif\_602

|                   |        |                   |        |
|-------------------|--------|-------------------|--------|
| loss_145.0725     | : 0.17 | loss_102.0275     | : 0.01 |
| fragment_277.2175 | : 0.09 | fragment_553.2775 | : 0.01 |
| fragment_177.1125 | : 0.06 | fragment_551.2675 | : 0.01 |
| fragment_233.1925 | : 0.06 | loss_88.0125      | : 0.01 |
| loss_117.0775     | : 0.05 | fragment_221.1375 | : 0.01 |
| fragment_233.1875 | : 0.05 | fragment_479.2425 | : 0.01 |
| fragment_552.2725 | : 0.04 | loss_160.0325     | : 0.01 |
| fragment_324.1575 | : 0.03 | fragment_144.0875 | : 0.01 |
| fragment_165.0875 | : 0.03 | loss_160.0775     | : 0.01 |
| loss_172.0825     | : 0.02 | fragment_493.2625 | : 0.01 |
| fragment_215.1025 | : 0.02 | loss_146.0175     | : 0.01 |
| fragment_321.2425 | : 0.02 | loss_115.0975     | : 0.01 |
| loss_194.1625     | : 0.02 | loss_194.1125     | : 0.01 |
| fragment_194.0825 | : 0.02 | loss_161.0475     | : 0.01 |
| loss_110.0825     | : 0.02 | loss_144.1025     | : 0.01 |
| loss_131.0875     | : 0.01 | fragment_121.0525 | : 0.01 |
| fragment_199.1475 | : 0.01 |                   |        |
| fragment_147.0825 | : 0.01 |                   |        |
| fragment_171.1475 | : 0.01 |                   |        |
| fragment_537.2525 | : 0.01 |                   |        |



motif\_601

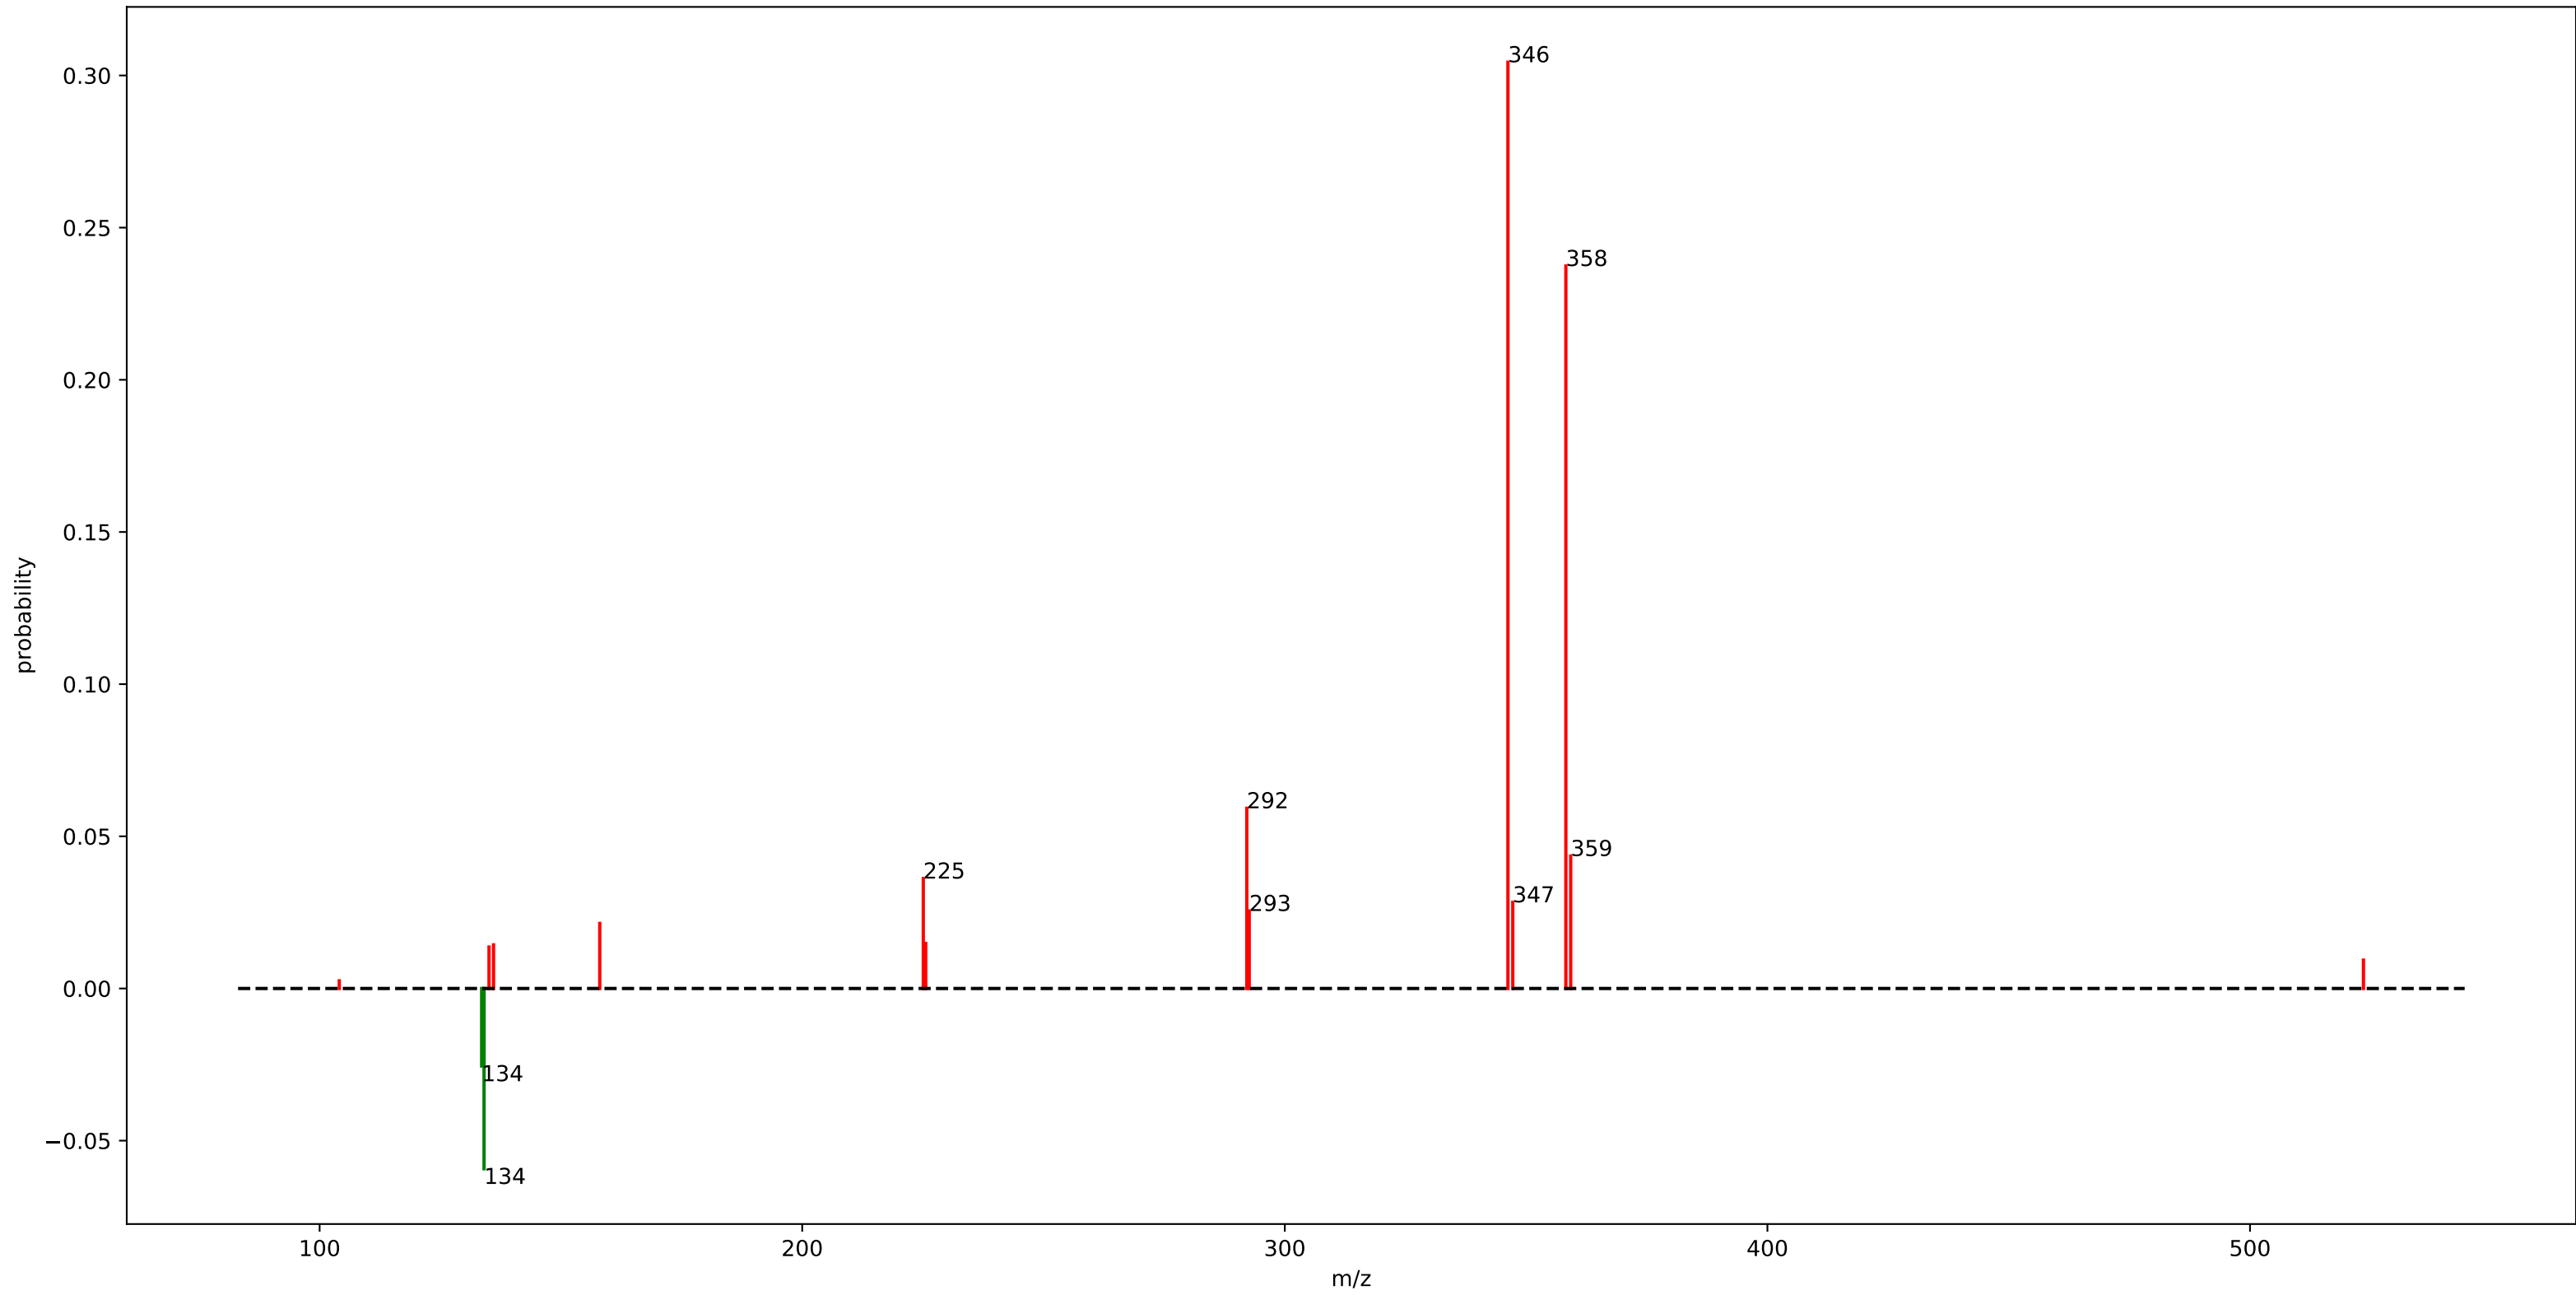

## motif\_601

|                   |        |
|-------------------|--------|
| fragment_346.2325 | : 0.30 |
| fragment_358.2325 | : 0.24 |
| fragment_292.1225 | : 0.06 |
| loss_134.0725     | : 0.06 |
| fragment_359.2375 | : 0.04 |
| fragment_225.0875 | : 0.04 |
| fragment_347.2375 | : 0.03 |
| fragment_292.6225 | : 0.03 |
| loss_133.5725     | : 0.03 |
| fragment_158.0475 | : 0.02 |
| fragment_225.5875 | : 0.01 |
| fragment_136.0375 | : 0.01 |
| fragment_135.1025 | : 0.01 |
| fragment_523.5075 | : 0.01 |

motif\_464

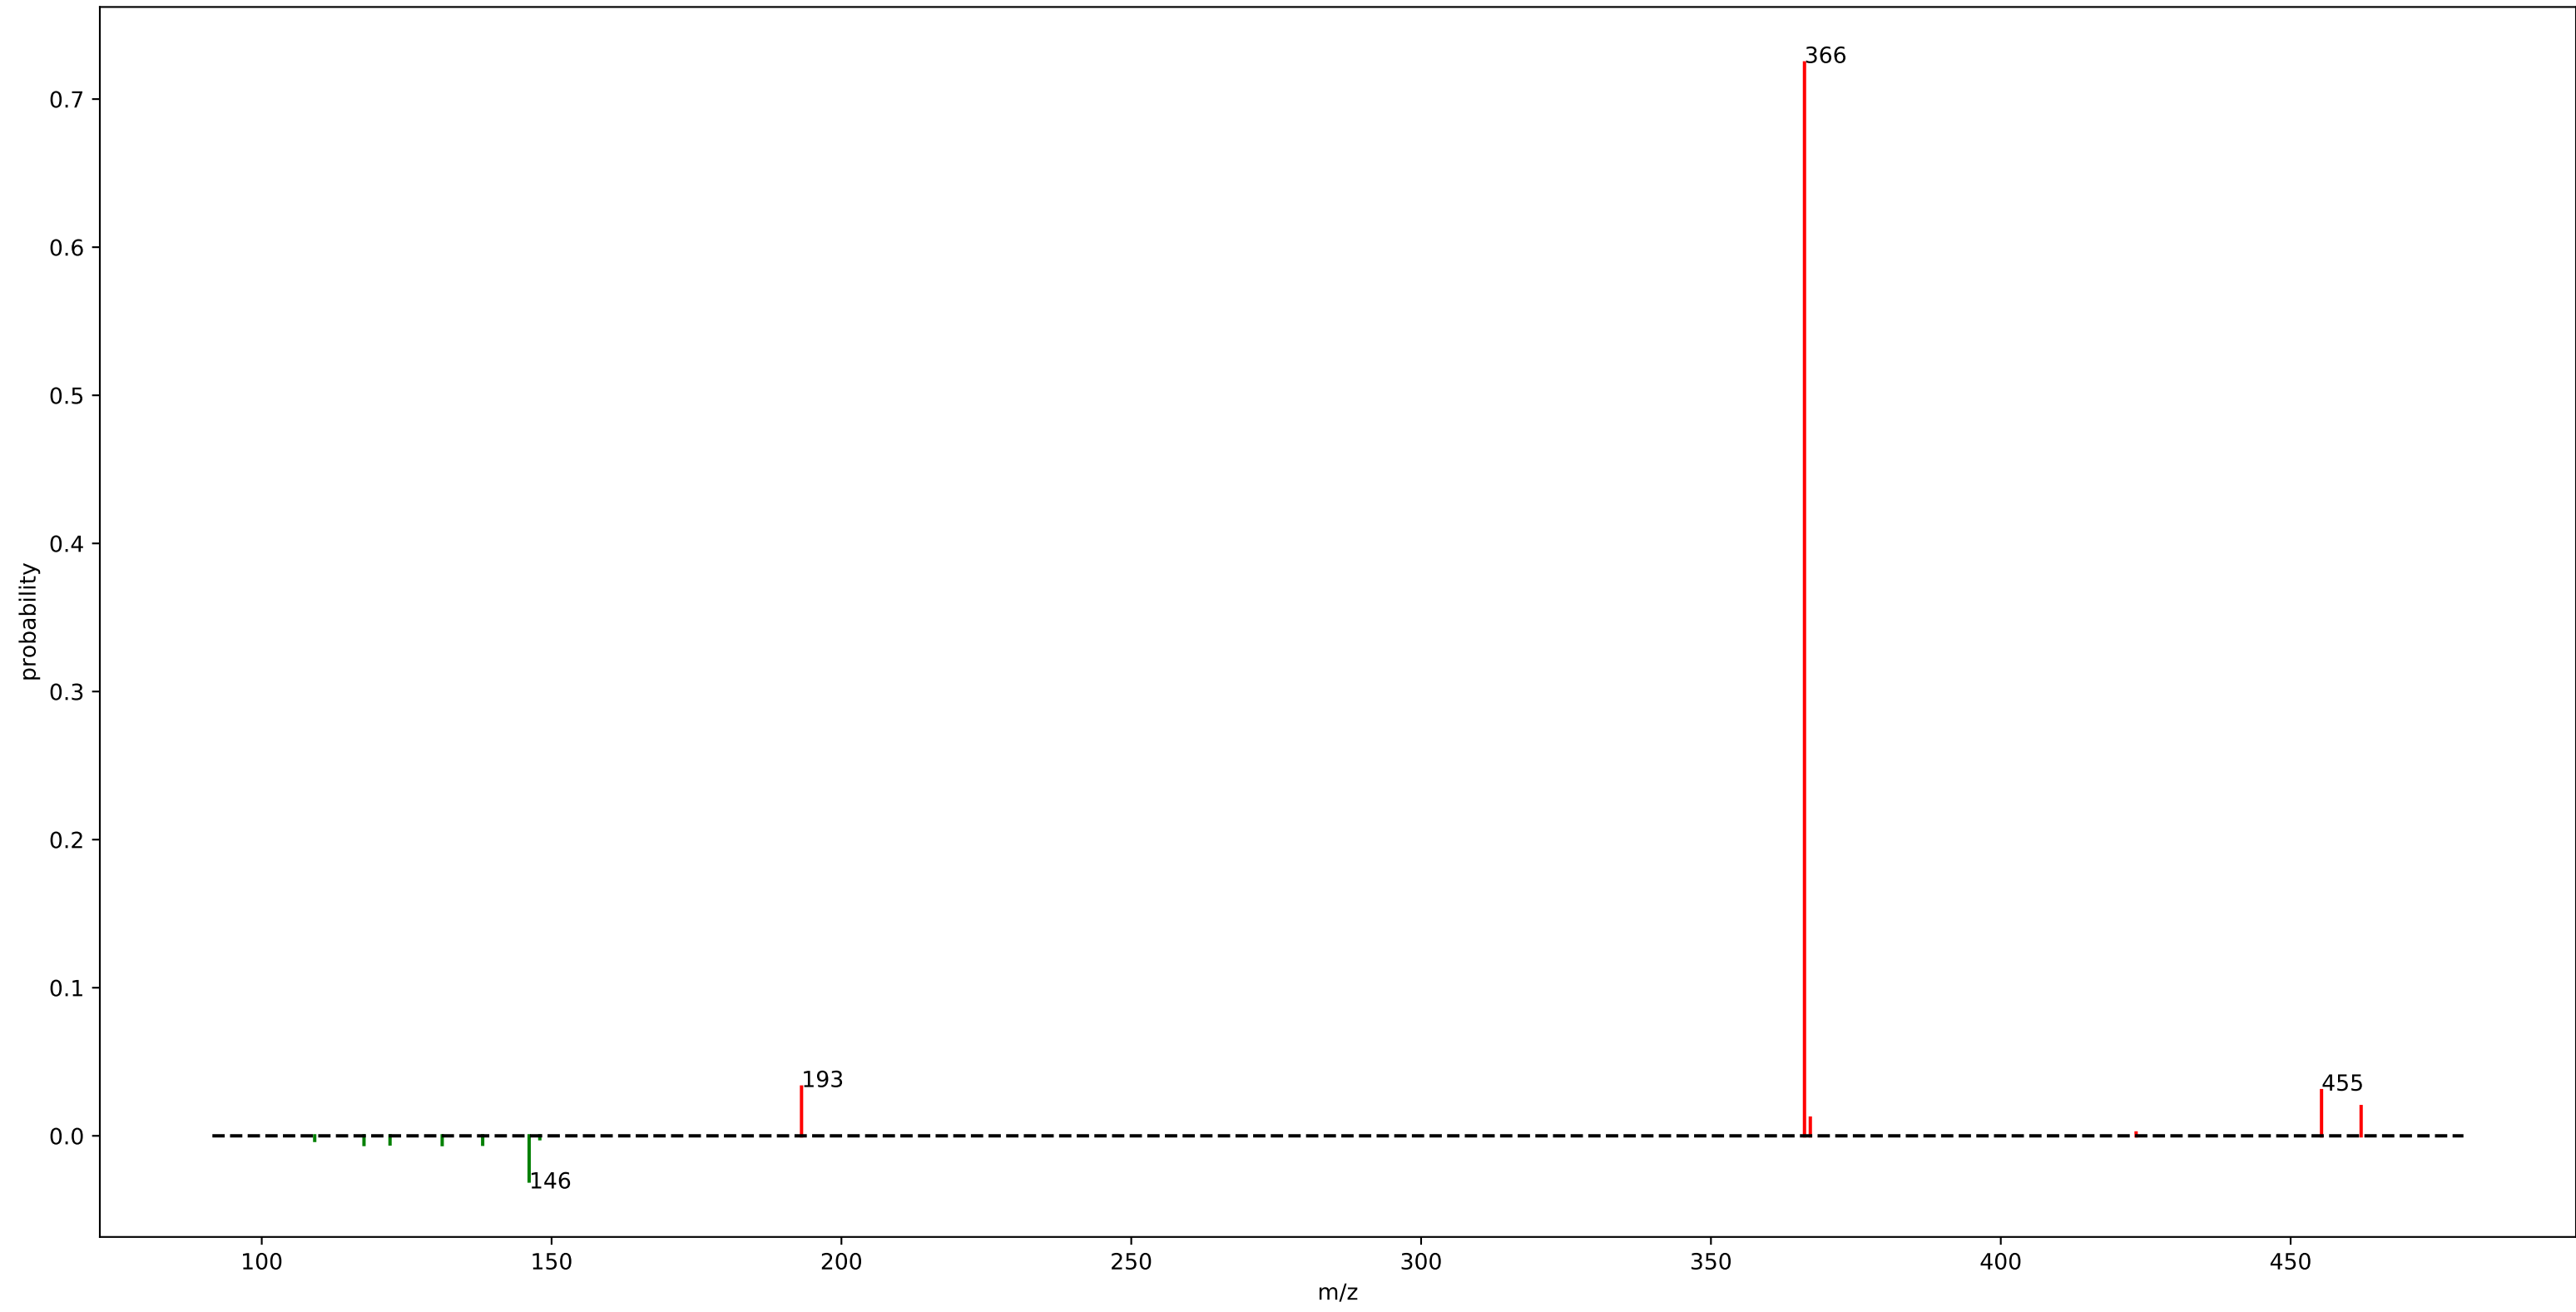

## motif\_464

|                   |        |
|-------------------|--------|
| fragment_366.1375 | : 0.72 |
| fragment_193.1175 | : 0.03 |
| loss_146.1275     | : 0.03 |
| fragment_455.3325 | : 0.03 |
| fragment_462.1625 | : 0.02 |
| fragment_367.1425 | : 0.01 |
| loss_131.1275     | : 0.01 |
| loss_117.6375     | : 0.01 |
| loss_138.1125     | : 0.01 |
| loss_122.1275     | : 0.01 |

motif\_607

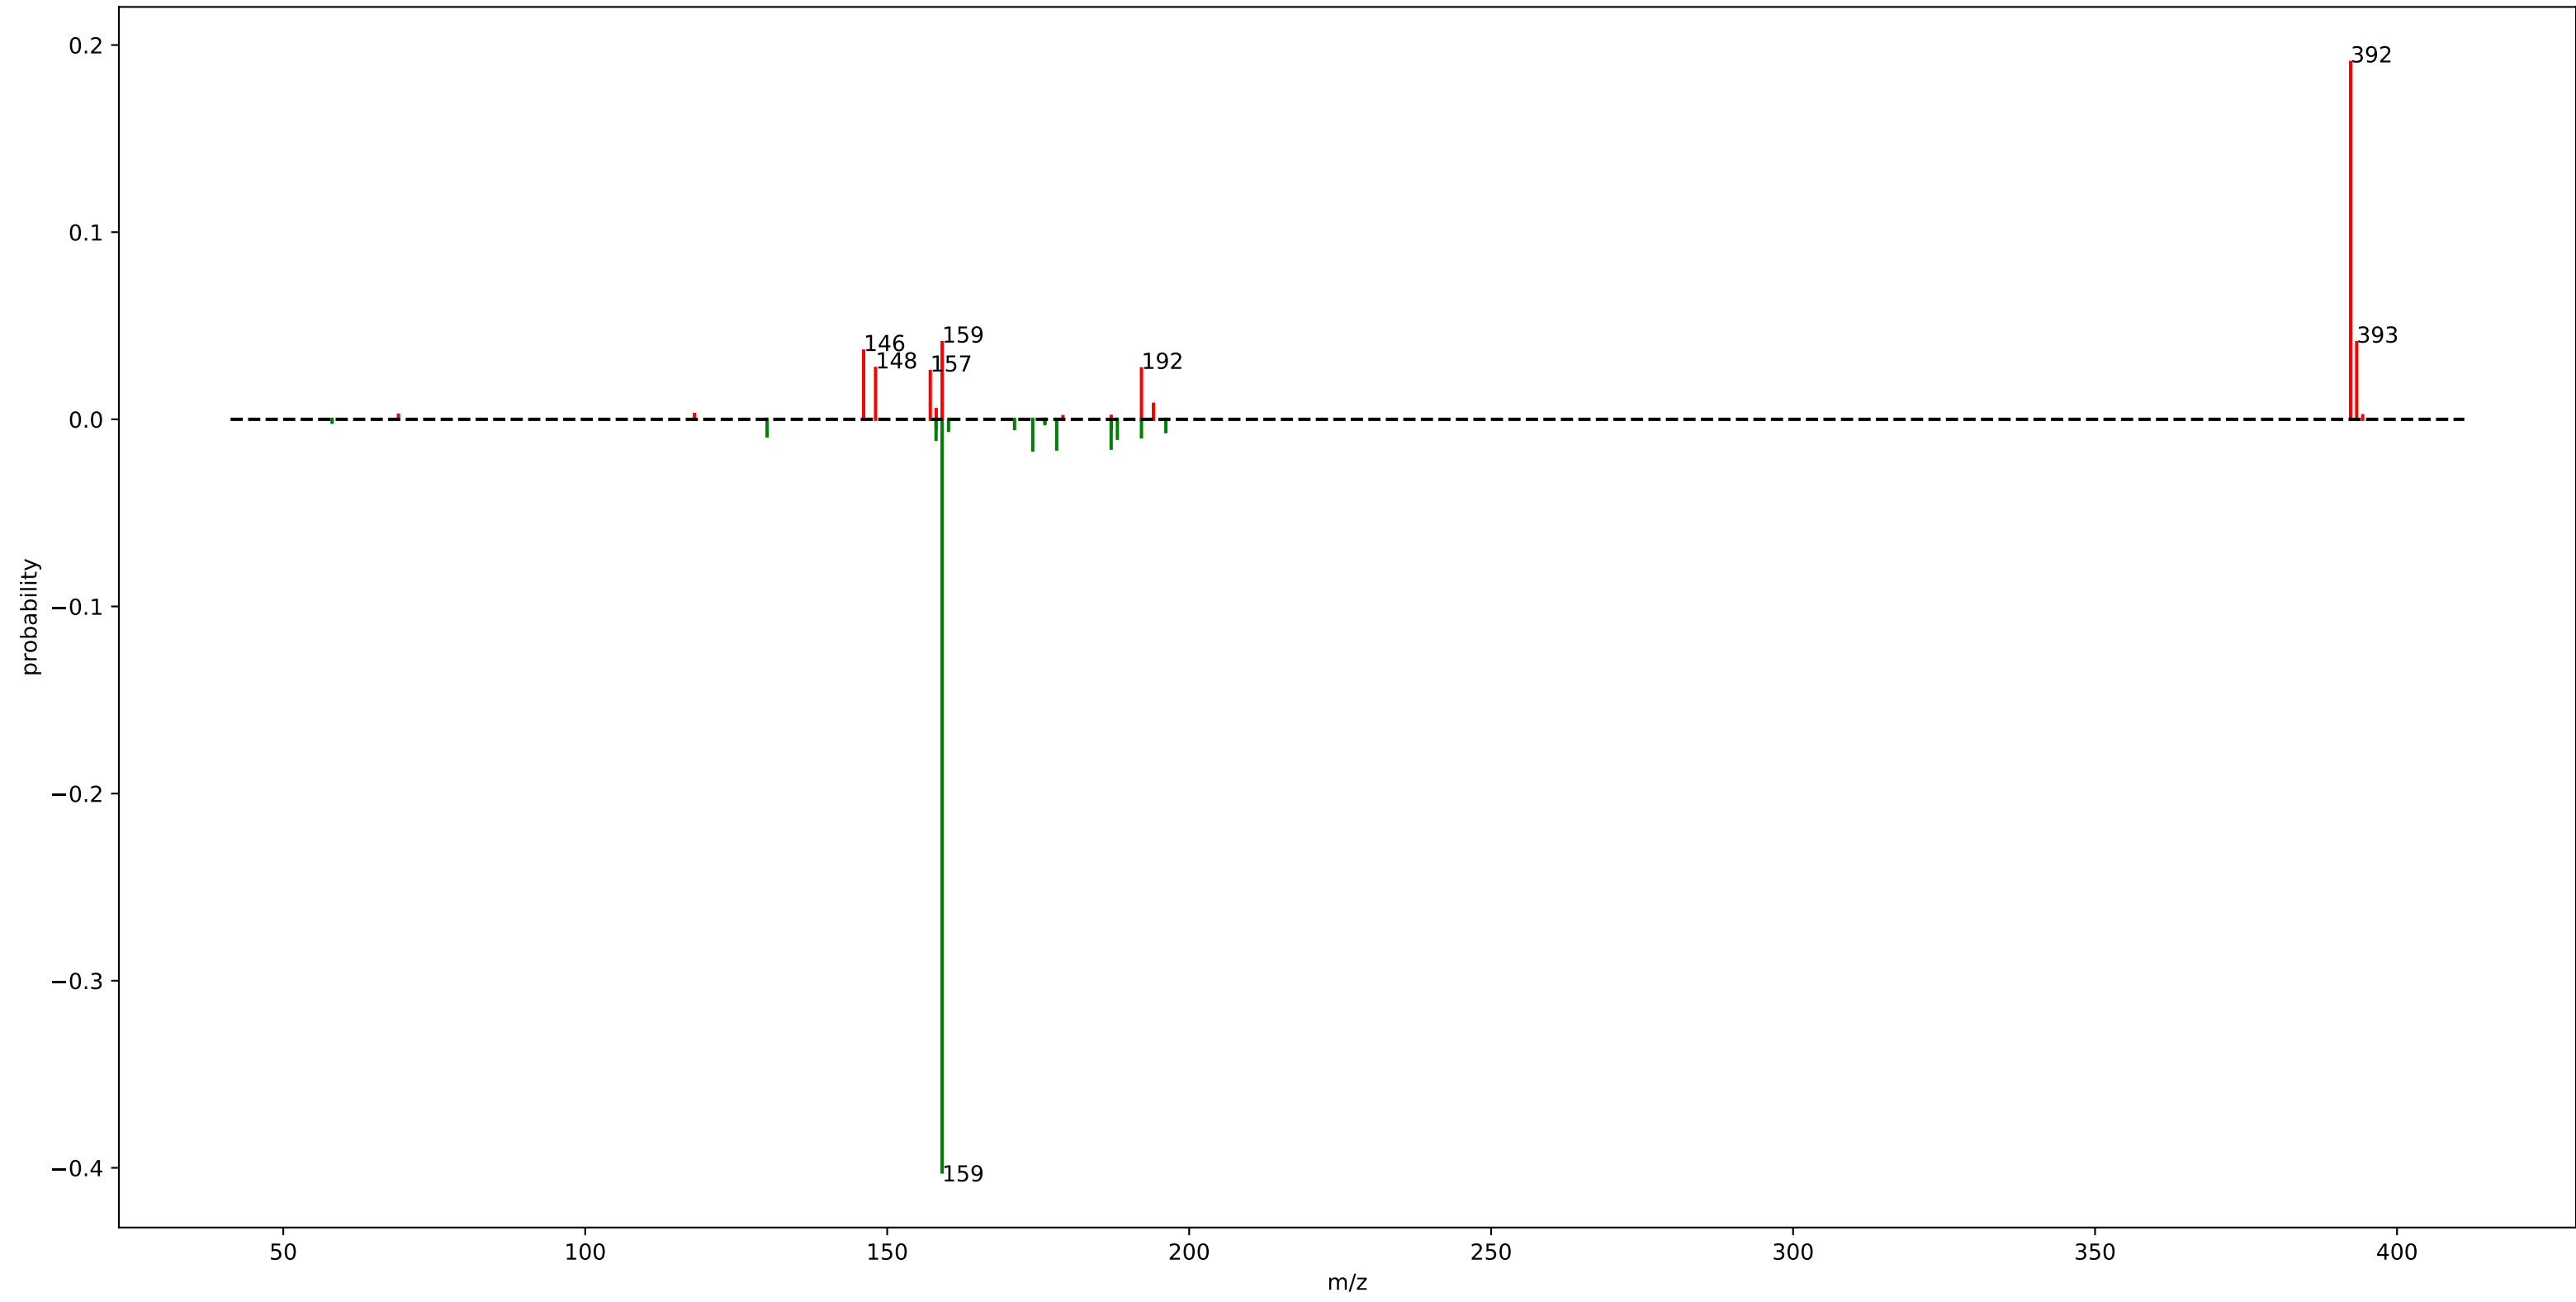

## motif\_607

|                   |        |
|-------------------|--------|
| loss_159.0875     | : 0.40 |
| fragment_392.3125 | : 0.19 |
| fragment_159.0925 | : 0.04 |
| fragment_393.3175 | : 0.04 |
| fragment_146.0975 | : 0.04 |
| fragment_148.0725 | : 0.03 |
| fragment_192.1025 | : 0.03 |
| fragment_157.1325 | : 0.03 |
| loss_174.0975     | : 0.02 |
| loss_178.0625     | : 0.02 |
| loss_187.0825     | : 0.02 |
| loss_158.0875     | : 0.01 |
| loss_188.1125     | : 0.01 |
| loss_192.0975     | : 0.01 |
| loss_130.1075     | : 0.01 |
| fragment_194.0825 | : 0.01 |
| loss_196.1375     | : 0.01 |
| loss_160.1575     | : 0.01 |
| fragment_158.1175 | : 0.01 |
| loss_187.1175     | : 0.01 |

euphorbia\_motif\_435.m2m

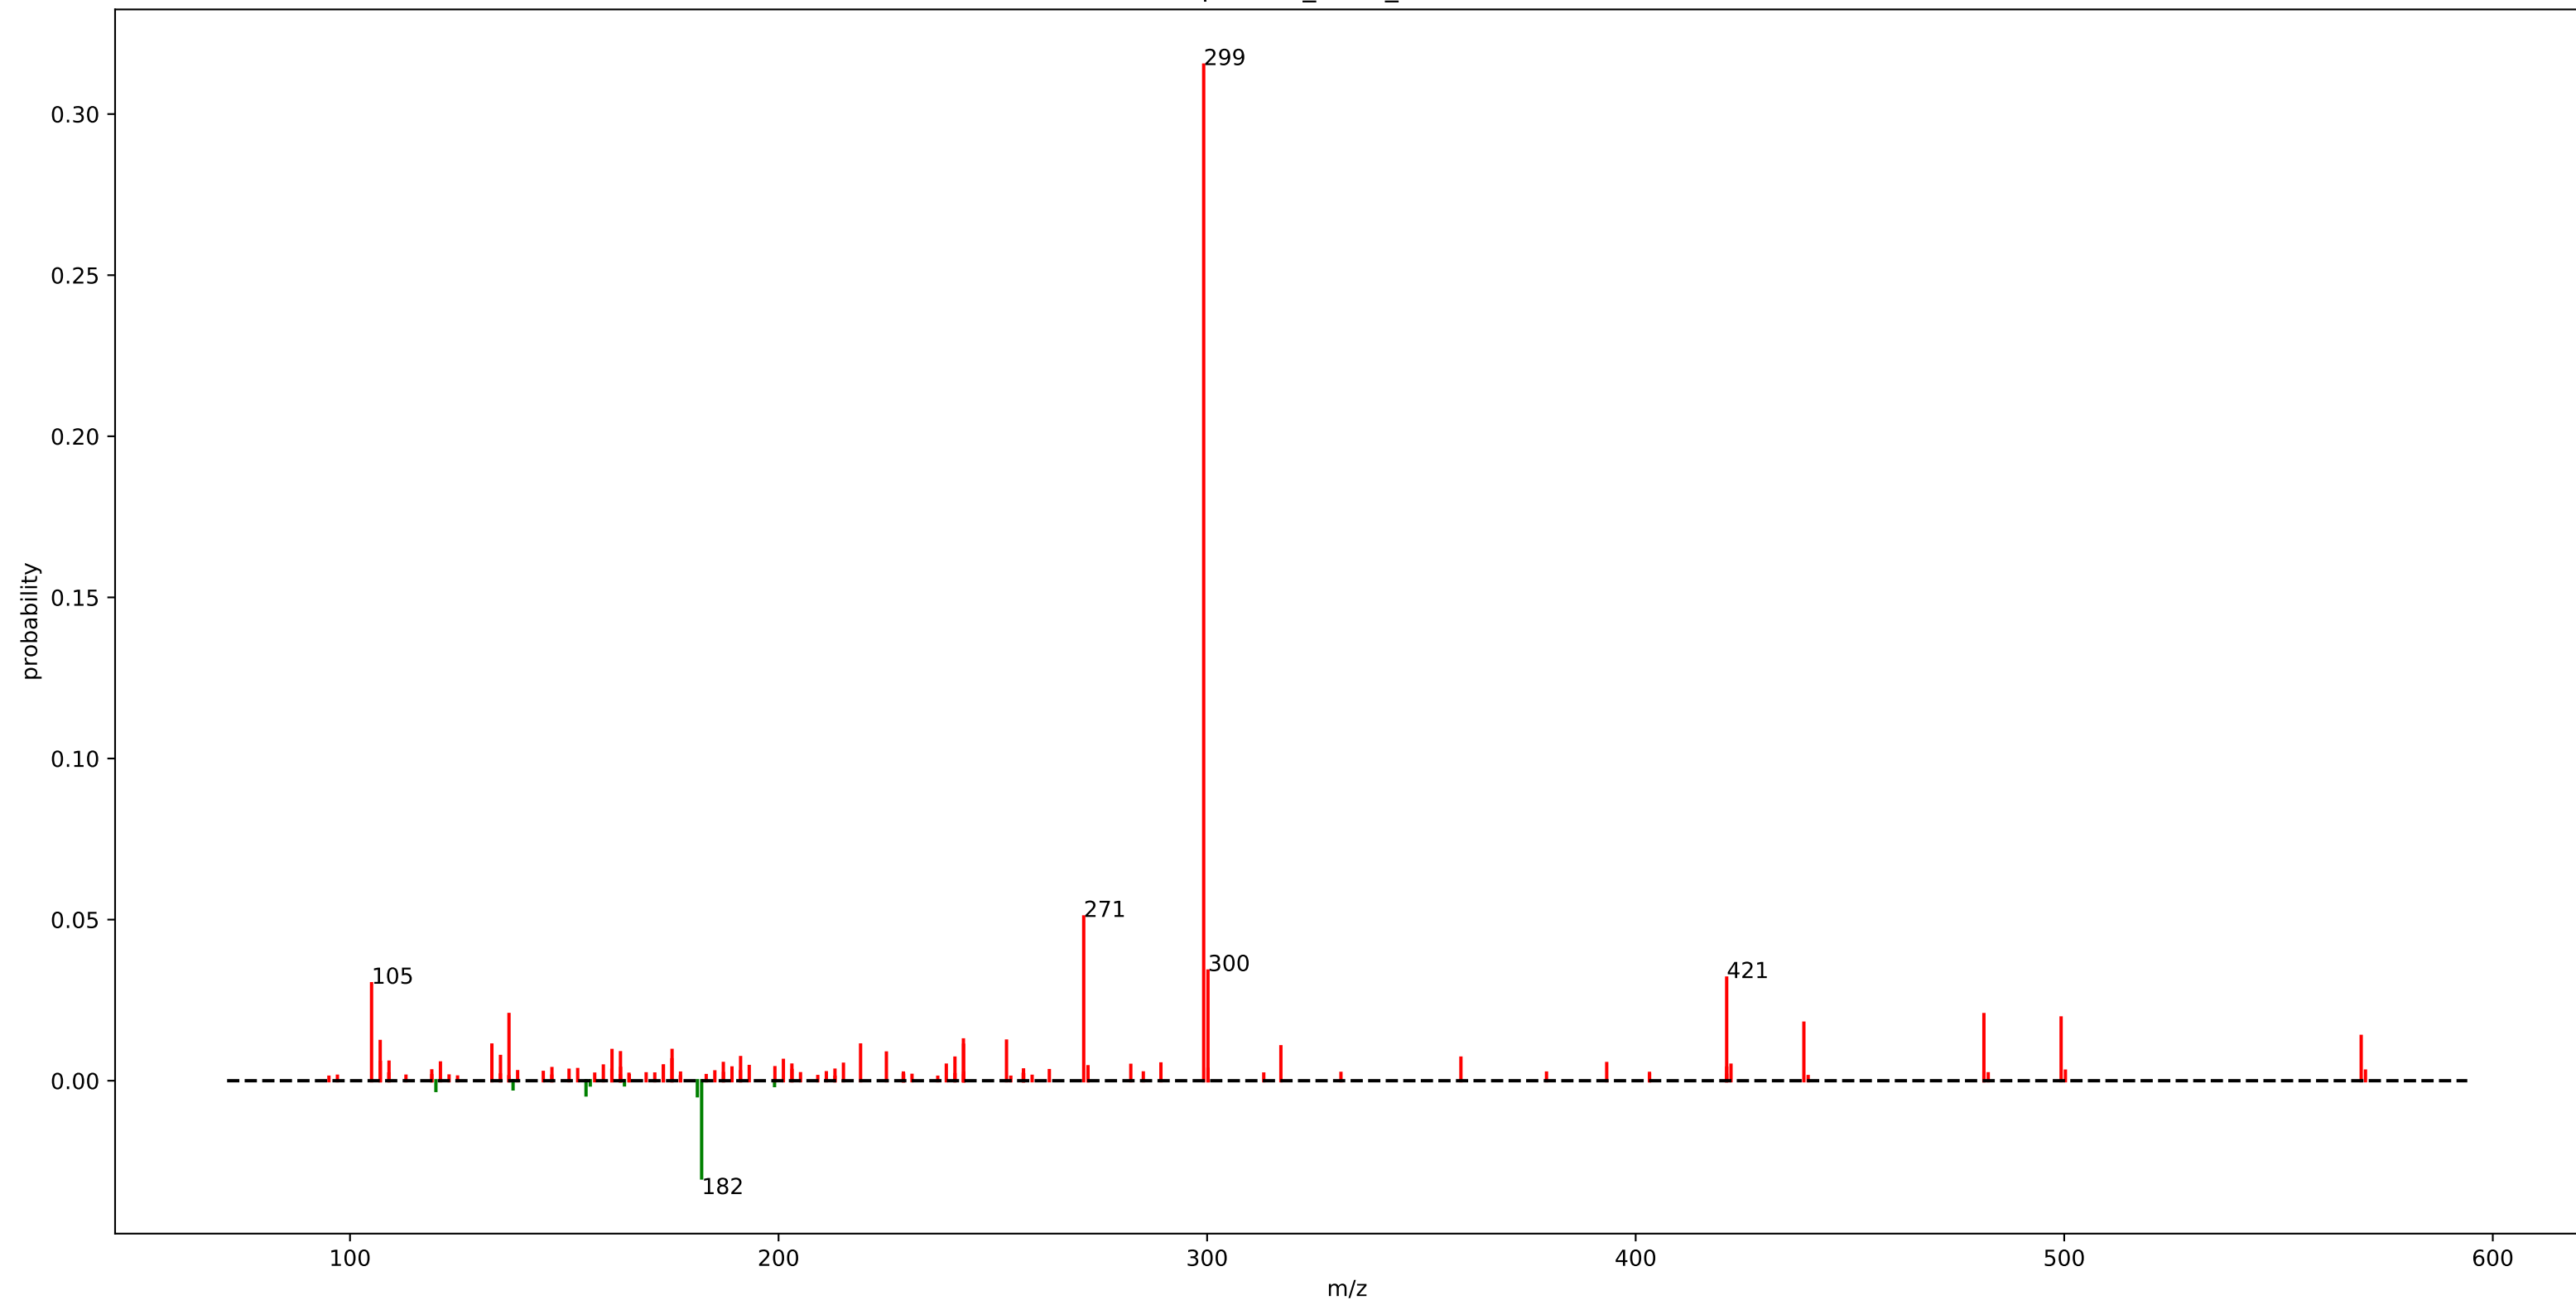

# euphorbia\_motif\_435.m2m

|                   |        |                   |        |
|-------------------|--------|-------------------|--------|
| fragment_299.2025 | : 0.32 | fragment_163.1125 | : 0.01 |
| fragment_271.2075 | : 0.05 | fragment_225.1625 | : 0.01 |
| fragment_300.2025 | : 0.03 | fragment_135.1175 | : 0.01 |
| fragment_421.2375 | : 0.03 | fragment_191.1425 | : 0.01 |
| loss_182.0525     | : 0.03 | fragment_359.2225 | : 0.01 |
| fragment_105.0325 | : 0.03 | fragment_241.1575 | : 0.01 |
| fragment_137.0975 | : 0.02 | fragment_175.1125 | : 0.01 |
| fragment_481.2575 | : 0.02 | fragment_201.1275 | : 0.01 |
| fragment_499.2725 | : 0.02 | fragment_109.1025 | : 0.01 |
| fragment_439.2475 | : 0.02 | fragment_107.0875 | : 0.01 |
| fragment_569.2925 | : 0.01 | fragment_121.1025 | : 0.01 |
| fragment_243.1375 | : 0.01 | fragment_187.1125 | : 0.01 |
| fragment_253.1925 | : 0.01 | fragment_393.2425 | : 0.01 |
| fragment_107.0475 | : 0.01 | fragment_289.2175 | : 0.01 |
| fragment_219.1375 | : 0.01 | fragment_215.1425 | : 0.01 |
| fragment_133.1025 | : 0.01 |                   |        |
| fragment_243.1725 | : 0.01 |                   |        |
| fragment_317.2125 | : 0.01 |                   |        |
| fragment_175.1475 | : 0.01 |                   |        |
| fragment_161.1325 | : 0.01 |                   |        |



urine\_mass2motif\_65.m2m

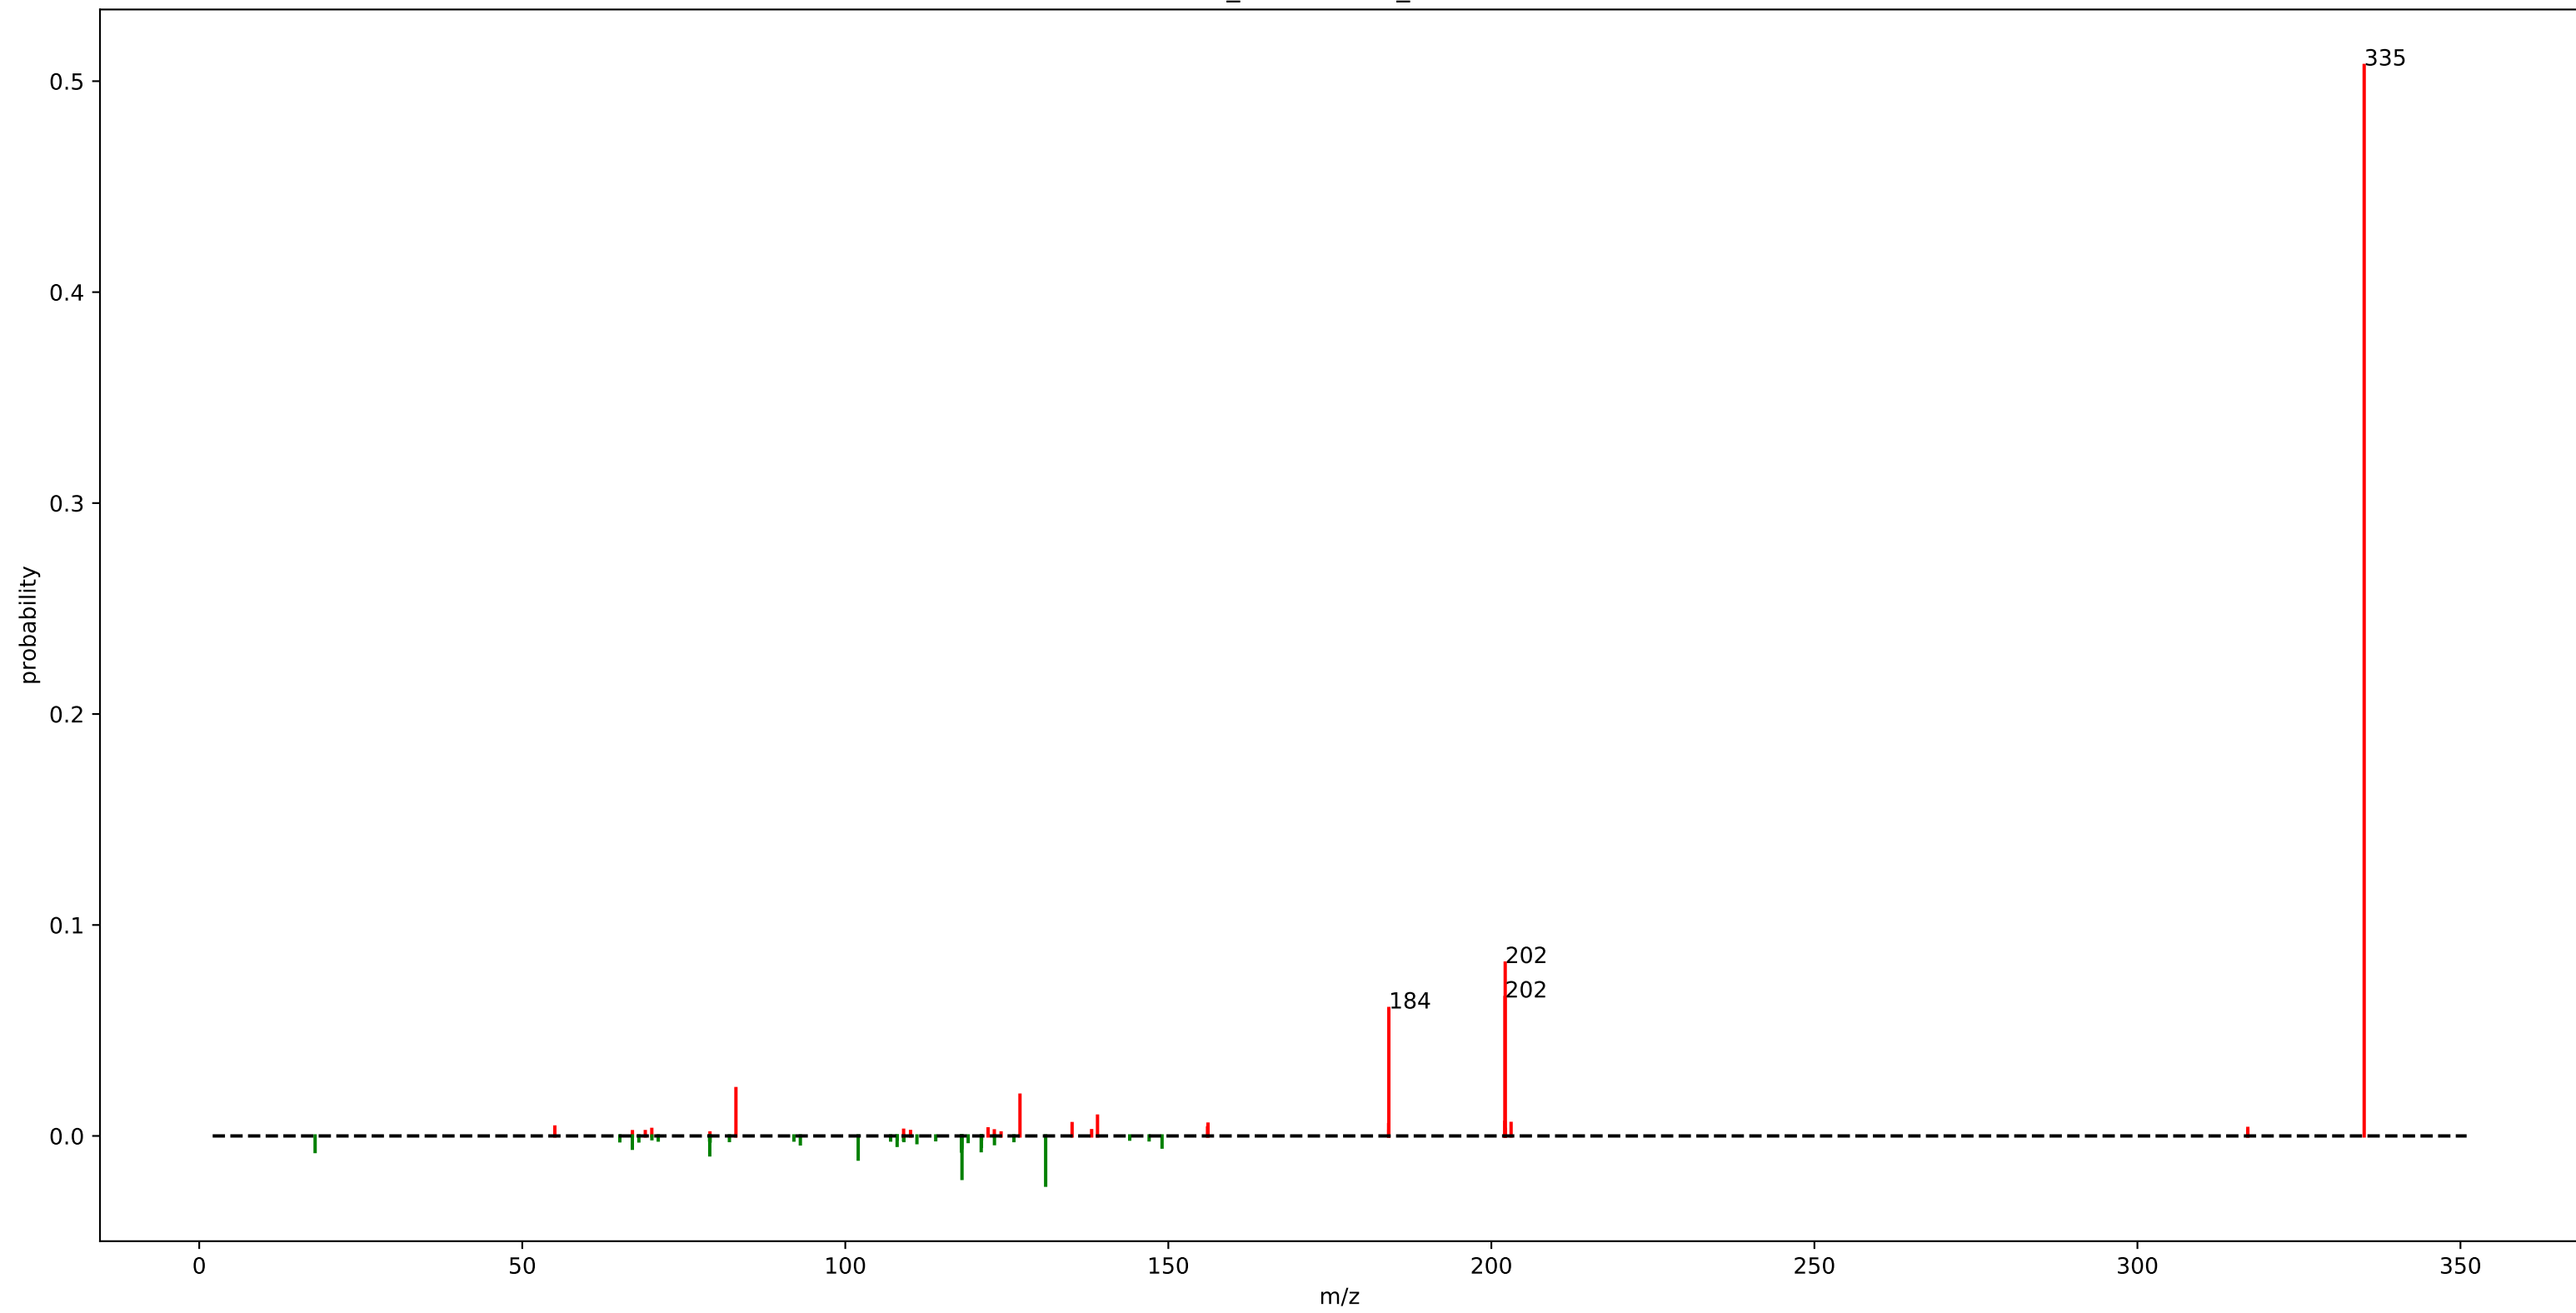

# urine\_mass2motif\_65.m2m

|                   |        |                   |        |
|-------------------|--------|-------------------|--------|
| fragment_335.0975 | : 0.51 | fragment_184.0975 | : 0.01 |
| fragment_202.1425 | : 0.08 | loss_149.0275     | : 0.01 |
| fragment_202.1075 | : 0.07 |                   |        |
| fragment_184.1325 | : 0.06 |                   |        |
| loss_131.0125     | : 0.02 |                   |        |
| fragment_83.0725  | : 0.02 |                   |        |
| loss_118.0625     | : 0.02 |                   |        |
| fragment_127.0375 | : 0.02 |                   |        |
| loss_101.9975     | : 0.01 |                   |        |
| fragment_139.0375 | : 0.01 |                   |        |
| loss_79.0225      | : 0.01 |                   |        |
| loss_17.9375      | : 0.01 |                   |        |
| loss_117.9875     | : 0.01 |                   |        |
| loss_121.0375     | : 0.01 |                   |        |
| fragment_202.0825 | : 0.01 |                   |        |
| fragment_203.0525 | : 0.01 |                   |        |
| fragment_135.1025 | : 0.01 |                   |        |
| loss_67.0375      | : 0.01 |                   |        |
| loss_118.0325     | : 0.01 |                   |        |
| fragment_156.1375 | : 0.01 |                   |        |

urine\_mass2motif\_221.m2m

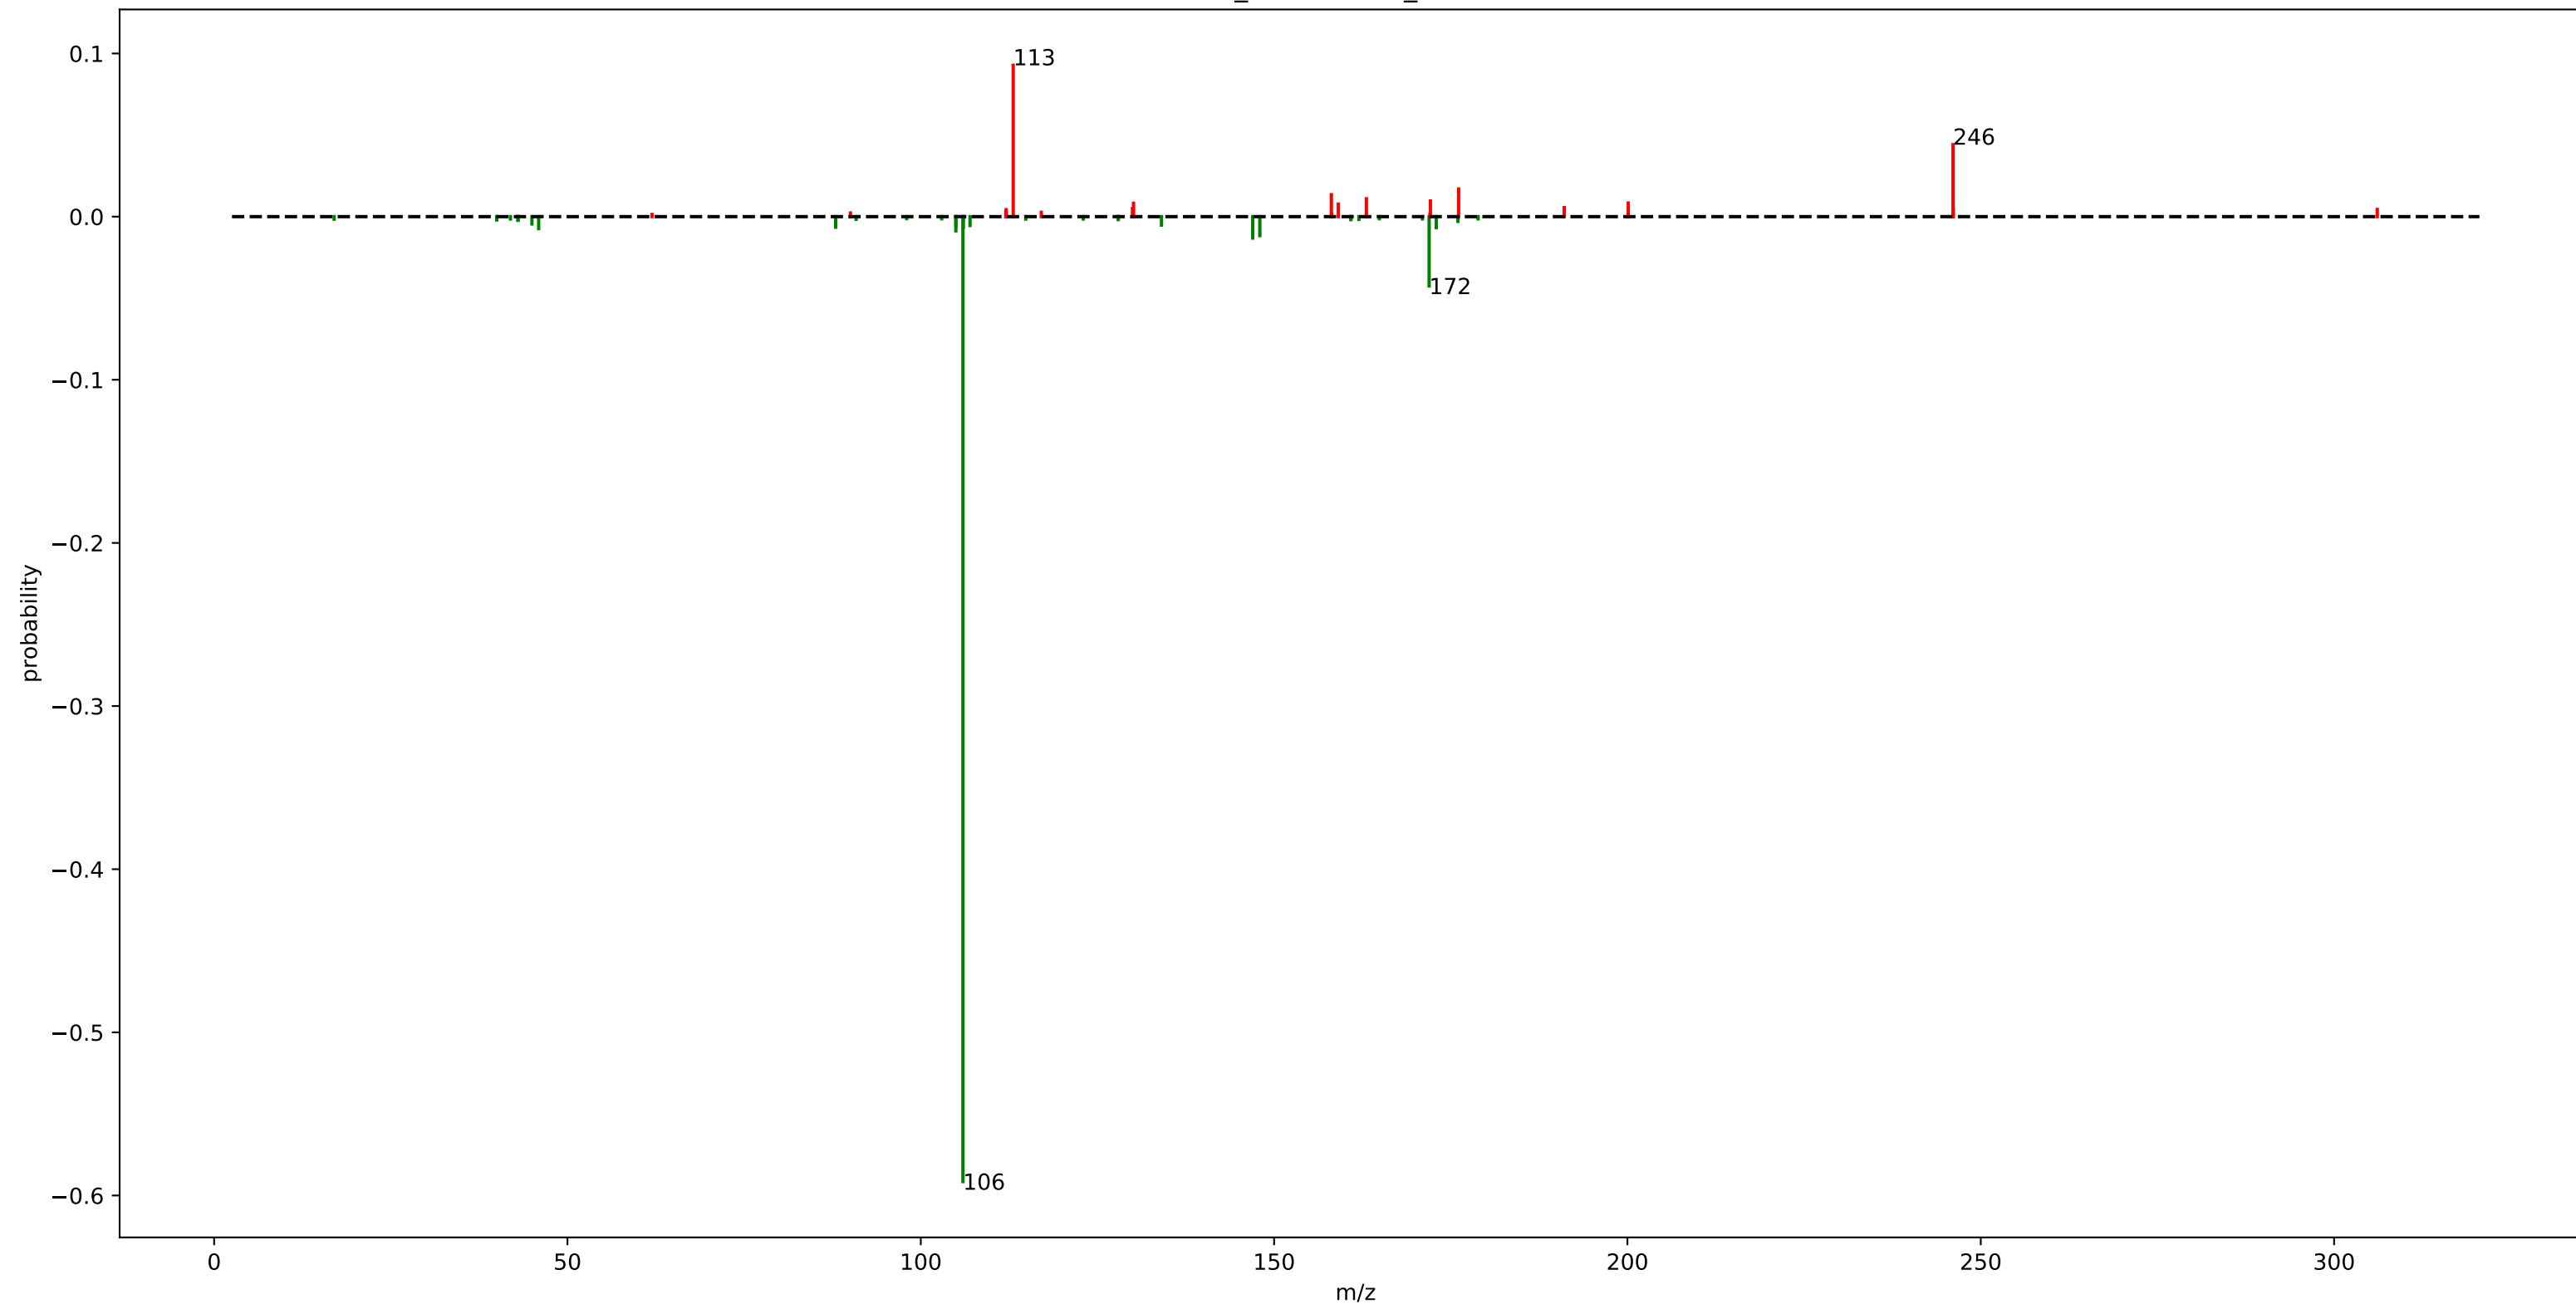

## urine\_mass2motif\_221.m2m

|                   |        |               |        |
|-------------------|--------|---------------|--------|
| loss_105.9675     | : 0.59 | loss_106.9675 | : 0.01 |
| fragment_113.0775 | : 0.09 | loss_134.0625 | : 0.01 |
| fragment_246.0775 | : 0.04 |               |        |
| loss_171.9375     | : 0.04 |               |        |
| fragment_176.1125 | : 0.02 |               |        |
| fragment_158.1025 | : 0.01 |               |        |
| loss_146.9725     | : 0.01 |               |        |
| loss_147.9775     | : 0.01 |               |        |
| fragment_163.0575 | : 0.01 |               |        |
| fragment_172.1175 | : 0.01 |               |        |
| loss_104.9625     | : 0.01 |               |        |
| fragment_200.1125 | : 0.01 |               |        |
| fragment_130.1075 | : 0.01 |               |        |
| fragment_159.0825 | : 0.01 |               |        |
| loss_45.9225      | : 0.01 |               |        |
| loss_172.9425     | : 0.01 |               |        |
| loss_106.0175     | : 0.01 |               |        |
| loss_87.9525      | : 0.01 |               |        |
| fragment_191.0525 | : 0.01 |               |        |
| loss_104.9725     | : 0.01 |               |        |

rhabdus\_motif\_281.m2m

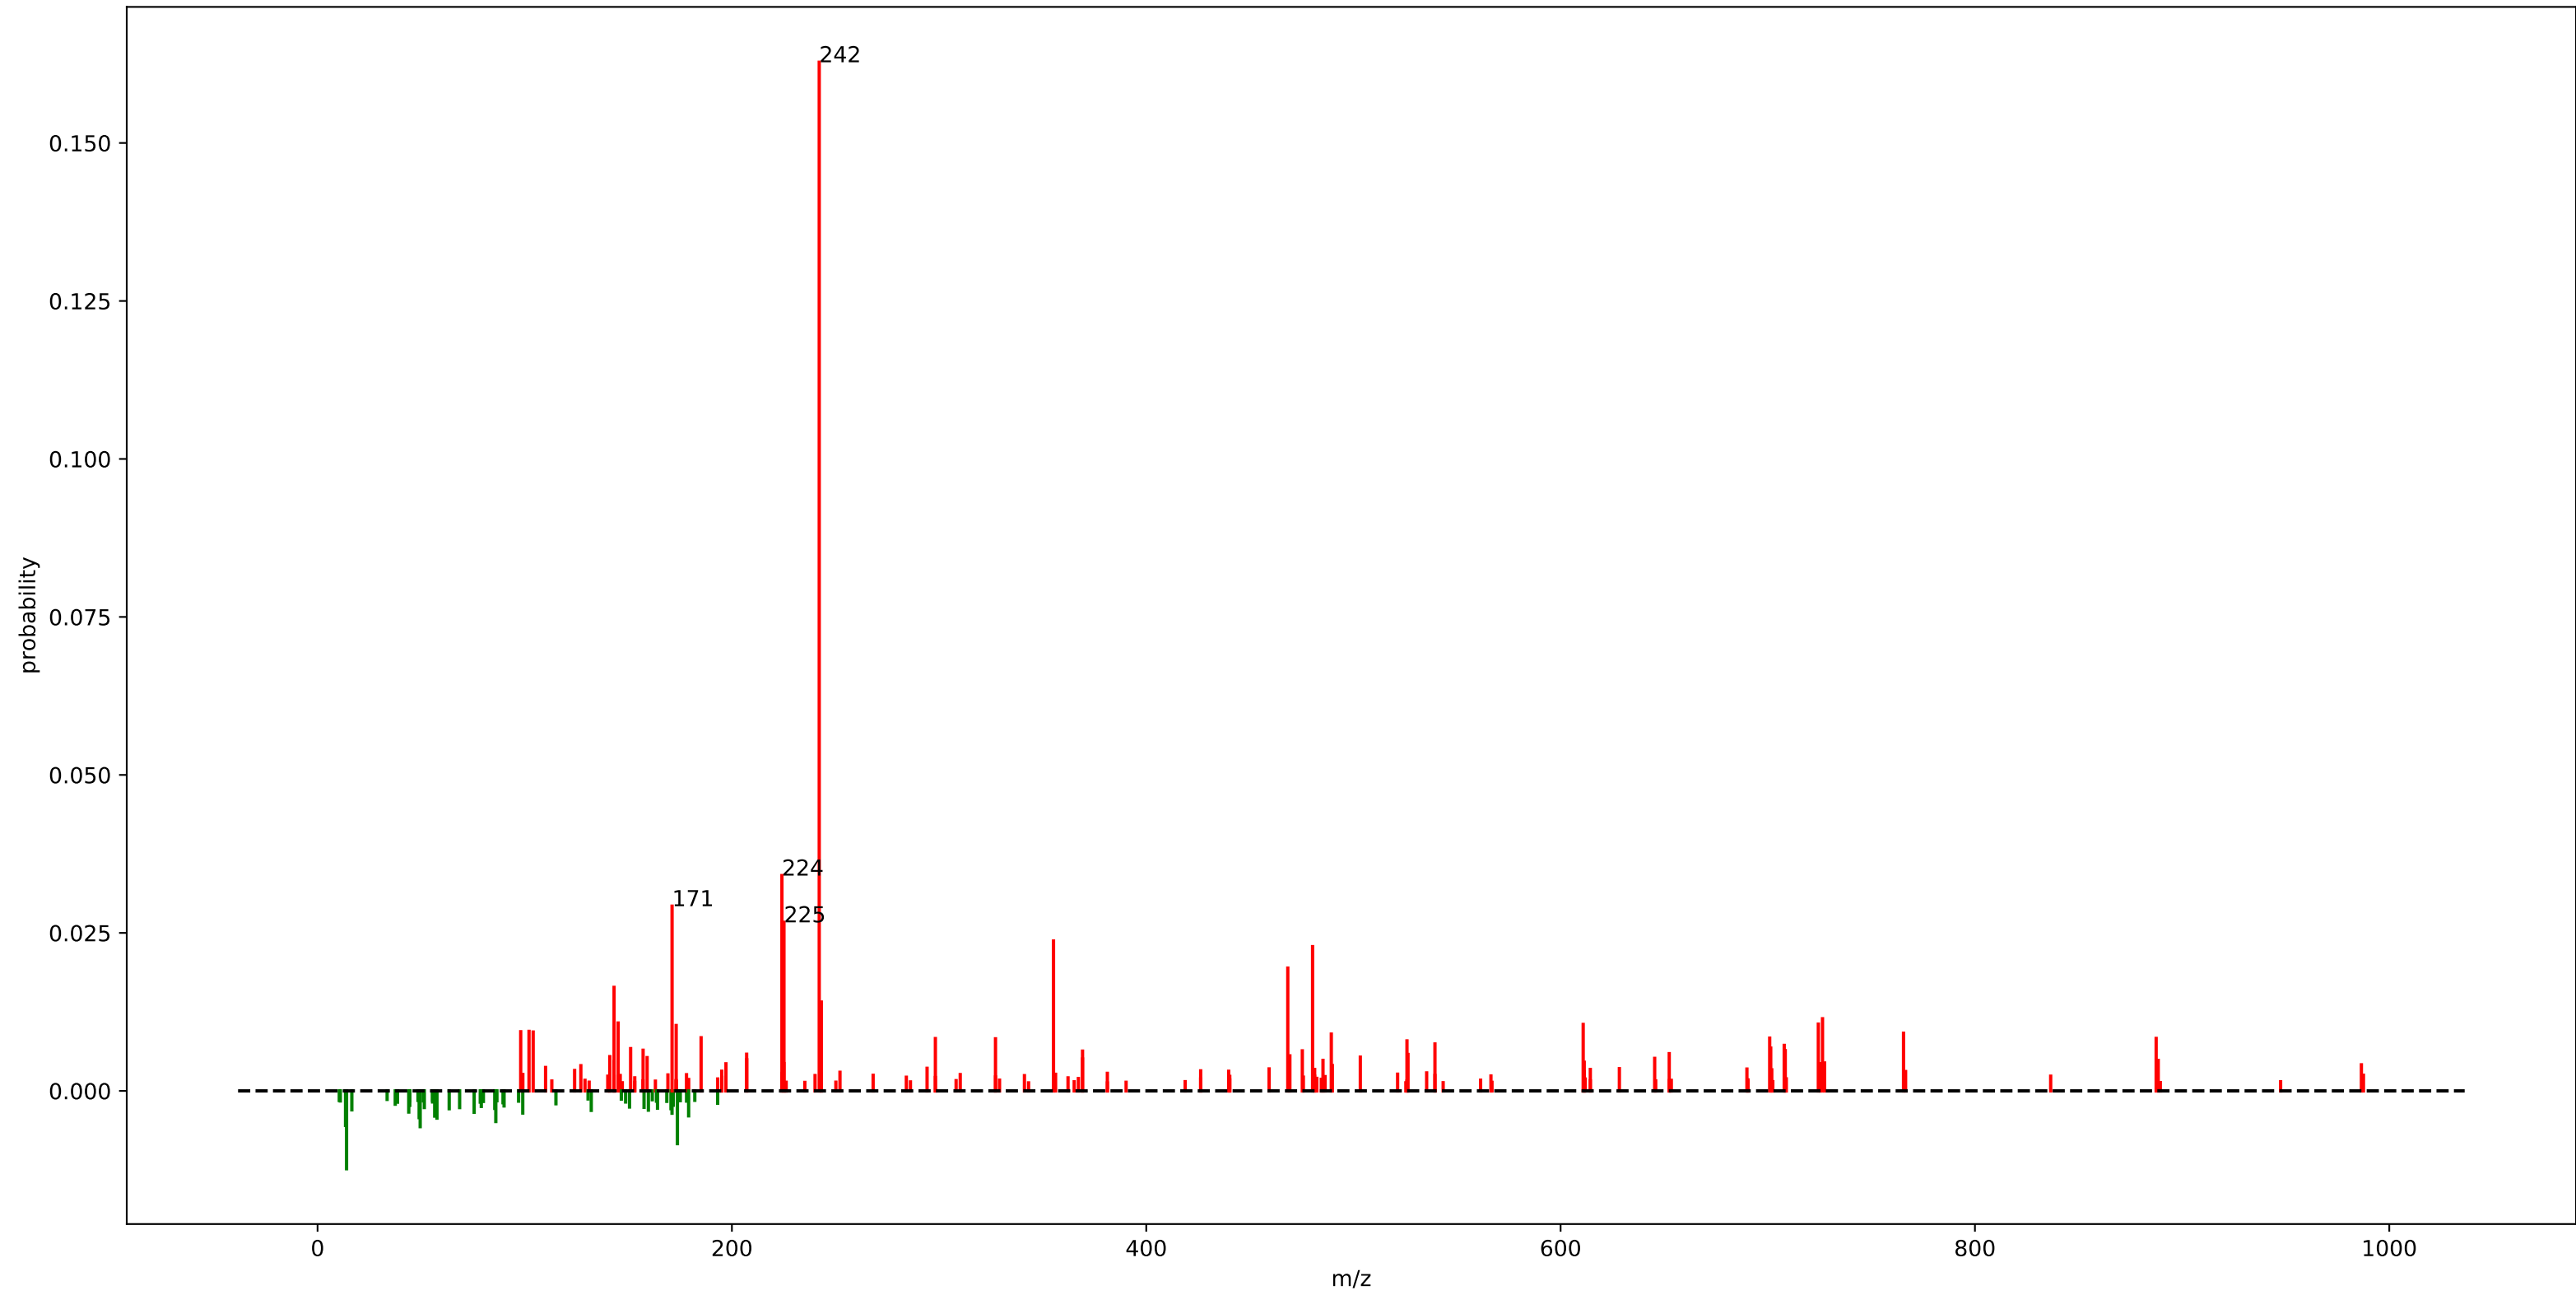

# rhabdus\_motif\_281.m2m

|                   |        |                   |        |                   |        |
|-------------------|--------|-------------------|--------|-------------------|--------|
| fragment_242.1475 | : 0.16 | fragment_185.1275 | : 0.01 | loss_13.4975      | : 0.01 |
| fragment_224.1375 | : 0.03 | fragment_700.9275 | : 0.01 | fragment_141.0675 | : 0.01 |
| fragment_171.1125 | : 0.03 | loss_173.6975     | : 0.01 | fragment_503.3225 | : 0.01 |
| fragment_225.1225 | : 0.03 | fragment_887.4675 | : 0.01 | fragment_159.0775 | : 0.01 |
| fragment_355.2325 | : 0.02 | fragment_298.2125 | : 0.01 | fragment_645.4125 | : 0.01 |
| fragment_480.2825 | : 0.02 | fragment_327.2325 | : 0.01 | fragment_369.2475 | : 0.01 |
| fragment_468.3175 | : 0.02 | fragment_525.8475 | : 0.01 |                   |        |
| fragment_143.1175 | : 0.02 | fragment_539.3525 | : 0.01 |                   |        |
| fragment_243.1525 | : 0.01 | fragment_707.9375 | : 0.01 |                   |        |
| loss_13.9975      | : 0.01 | fragment_701.4325 | : 0.01 |                   |        |
| fragment_726.4275 | : 0.01 | fragment_151.1125 | : 0.01 |                   |        |
| fragment_145.0975 | : 0.01 | fragment_157.1325 | : 0.01 |                   |        |
| fragment_724.4025 | : 0.01 | fragment_708.4425 | : 0.01 |                   |        |
| fragment_610.9025 | : 0.01 | fragment_475.3275 | : 0.01 |                   |        |
| fragment_173.0975 | : 0.01 | fragment_369.2525 | : 0.01 |                   |        |
| fragment_102.0675 | : 0.01 | fragment_652.4375 | : 0.01 |                   |        |
| fragment_98.0575  | : 0.01 | fragment_207.1125 | : 0.01 |                   |        |
| fragment_104.0675 | : 0.01 | fragment_526.3475 | : 0.01 |                   |        |
| fragment_765.5225 | : 0.01 | loss_49.5325      | : 0.01 |                   |        |
| fragment_489.3225 | : 0.01 | fragment_469.3225 | : 0.01 |                   |        |

rhabdus\_motif\_265.m2m

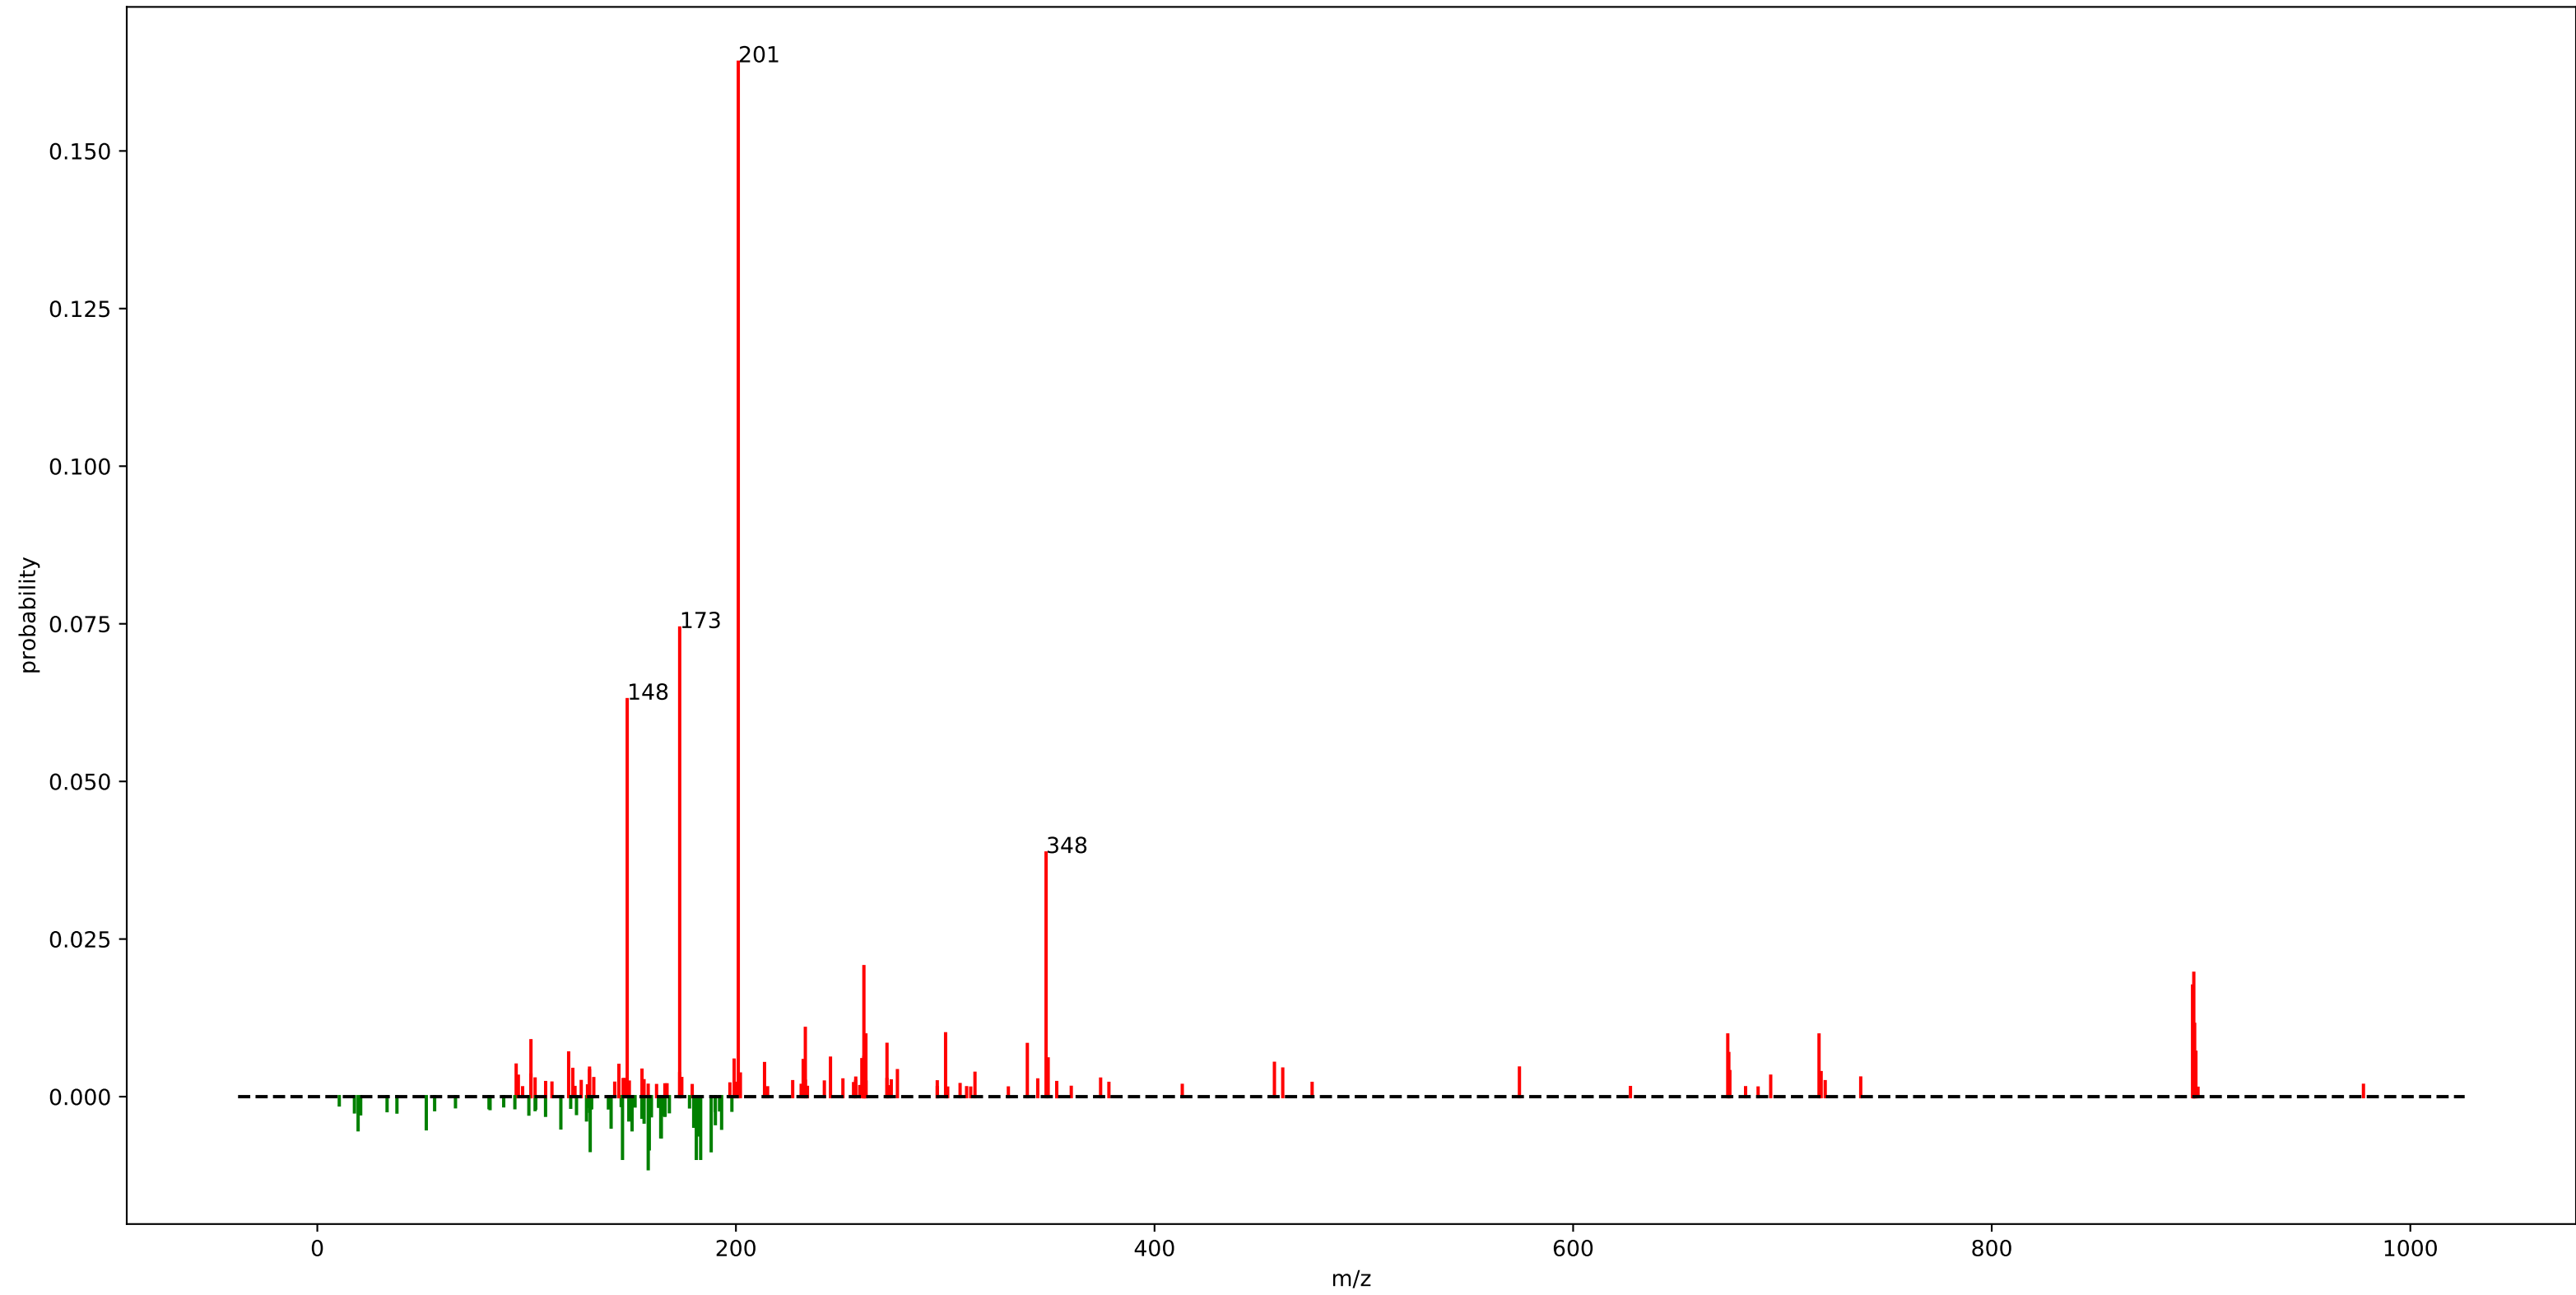

# rhabdus\_motif\_265.m2m

|                   |        |                   |        |                   |        |
|-------------------|--------|-------------------|--------|-------------------|--------|
| fragment_201.1225 | : 0.16 | loss_188.1775     | : 0.01 | loss_19.4875      | : 0.01 |
| fragment_173.1275 | : 0.07 | loss_130.3775     | : 0.01 | loss_52.0575      | : 0.01 |
| fragment_148.0575 | : 0.06 | fragment_272.1775 | : 0.01 | fragment_261.1475 | : 0.01 |
| fragment_348.1775 | : 0.04 | fragment_339.2275 | : 0.01 | loss_193.1575     | : 0.01 |
| fragment_261.1425 | : 0.02 | loss_158.6025     | : 0.01 | fragment_95.0025  | : 0.01 |
| fragment_896.5425 | : 0.02 | fragment_897.5475 | : 0.01 |                   |        |
| fragment_895.9475 | : 0.02 | fragment_120.0775 | : 0.01 |                   |        |
| fragment_896.9525 | : 0.01 | fragment_674.3875 | : 0.01 |                   |        |
| loss_158.0975     | : 0.01 | loss_164.3625     | : 0.01 |                   |        |
| fragment_233.1625 | : 0.01 | loss_164.0725     | : 0.01 |                   |        |
| fragment_300.1725 | : 0.01 | fragment_261.1575 | : 0.01 |                   |        |
| fragment_896.4525 | : 0.01 | fragment_245.1775 | : 0.01 |                   |        |
| fragment_896.4475 | : 0.01 | loss_182.1725     | : 0.01 |                   |        |
| fragment_673.8825 | : 0.01 | fragment_349.1775 | : 0.01 |                   |        |
| fragment_262.0975 | : 0.01 | fragment_260.1675 | : 0.01 |                   |        |
| loss_181.0675     | : 0.01 | fragment_199.1525 | : 0.01 |                   |        |
| loss_145.8125     | : 0.01 | fragment_232.1375 | : 0.01 |                   |        |
| loss_183.1525     | : 0.01 | fragment_457.2825 | : 0.01 |                   |        |
| fragment_717.4875 | : 0.01 | loss_150.3725     | : 0.01 |                   |        |
| fragment_102.0575 | : 0.01 | fragment_213.6675 | : 0.01 |                   |        |



StrepSalini\_motif\_20.m2m

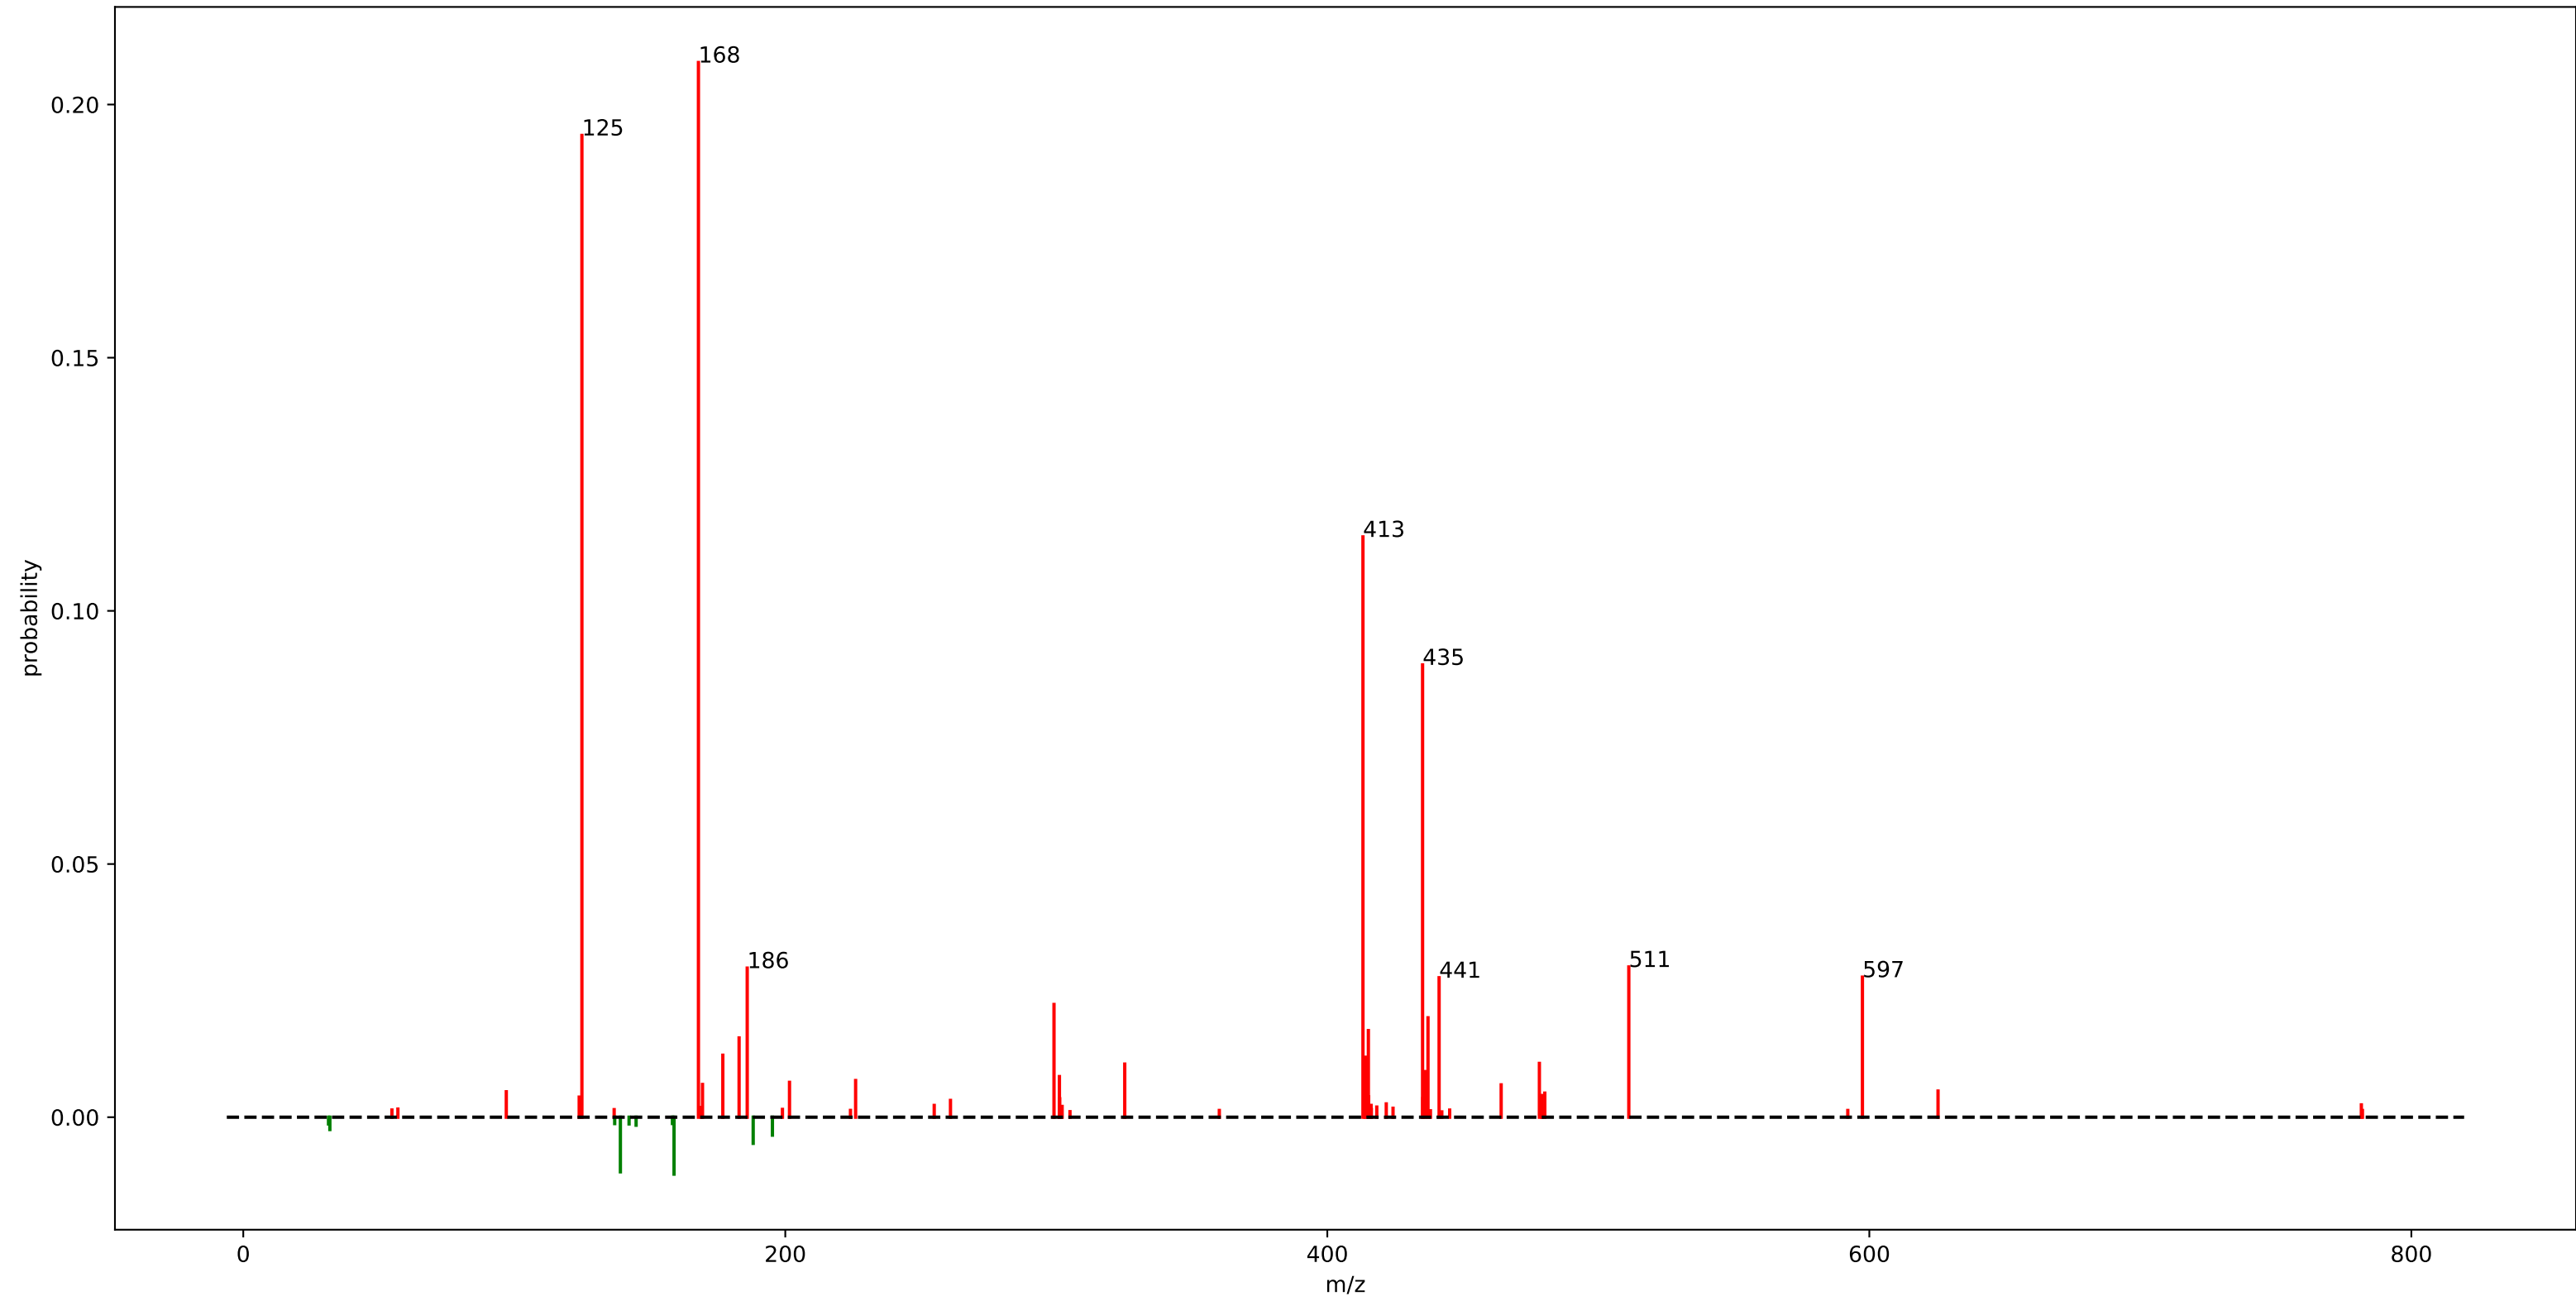

## StrepSalini\_motif\_20.m2m

|                   |        |                   |        |
|-------------------|--------|-------------------|--------|
| fragment_167.9500 | : 0.21 | fragment_225.9500 | : 0.01 |
| fragment_124.9500 | : 0.19 | fragment_201.5500 | : 0.01 |
| fragment_413.1500 | : 0.11 | fragment_169.4500 | : 0.01 |
| fragment_435.1500 | : 0.09 | fragment_464.1500 | : 0.01 |
| fragment_511.2500 | : 0.03 | loss_188.1500     | : 0.01 |
| fragment_185.9500 | : 0.03 | fragment_625.3500 | : 0.01 |
| fragment_597.4500 | : 0.03 | fragment_97.0500  | : 0.01 |
| fragment_441.2500 | : 0.03 |                   |        |
| fragment_299.1500 | : 0.02 |                   |        |
| fragment_437.1500 | : 0.02 |                   |        |
| fragment_415.1500 | : 0.02 |                   |        |
| fragment_182.9500 | : 0.02 |                   |        |
| fragment_176.9500 | : 0.01 |                   |        |
| fragment_414.1500 | : 0.01 |                   |        |
| loss_158.9500     | : 0.01 |                   |        |
| loss_139.1525     | : 0.01 |                   |        |
| fragment_478.2500 | : 0.01 |                   |        |
| fragment_325.2525 | : 0.01 |                   |        |
| fragment_436.1500 | : 0.01 |                   |        |
| fragment_301.1500 | : 0.01 |                   |        |

urine\_mass2motif\_273.m2m

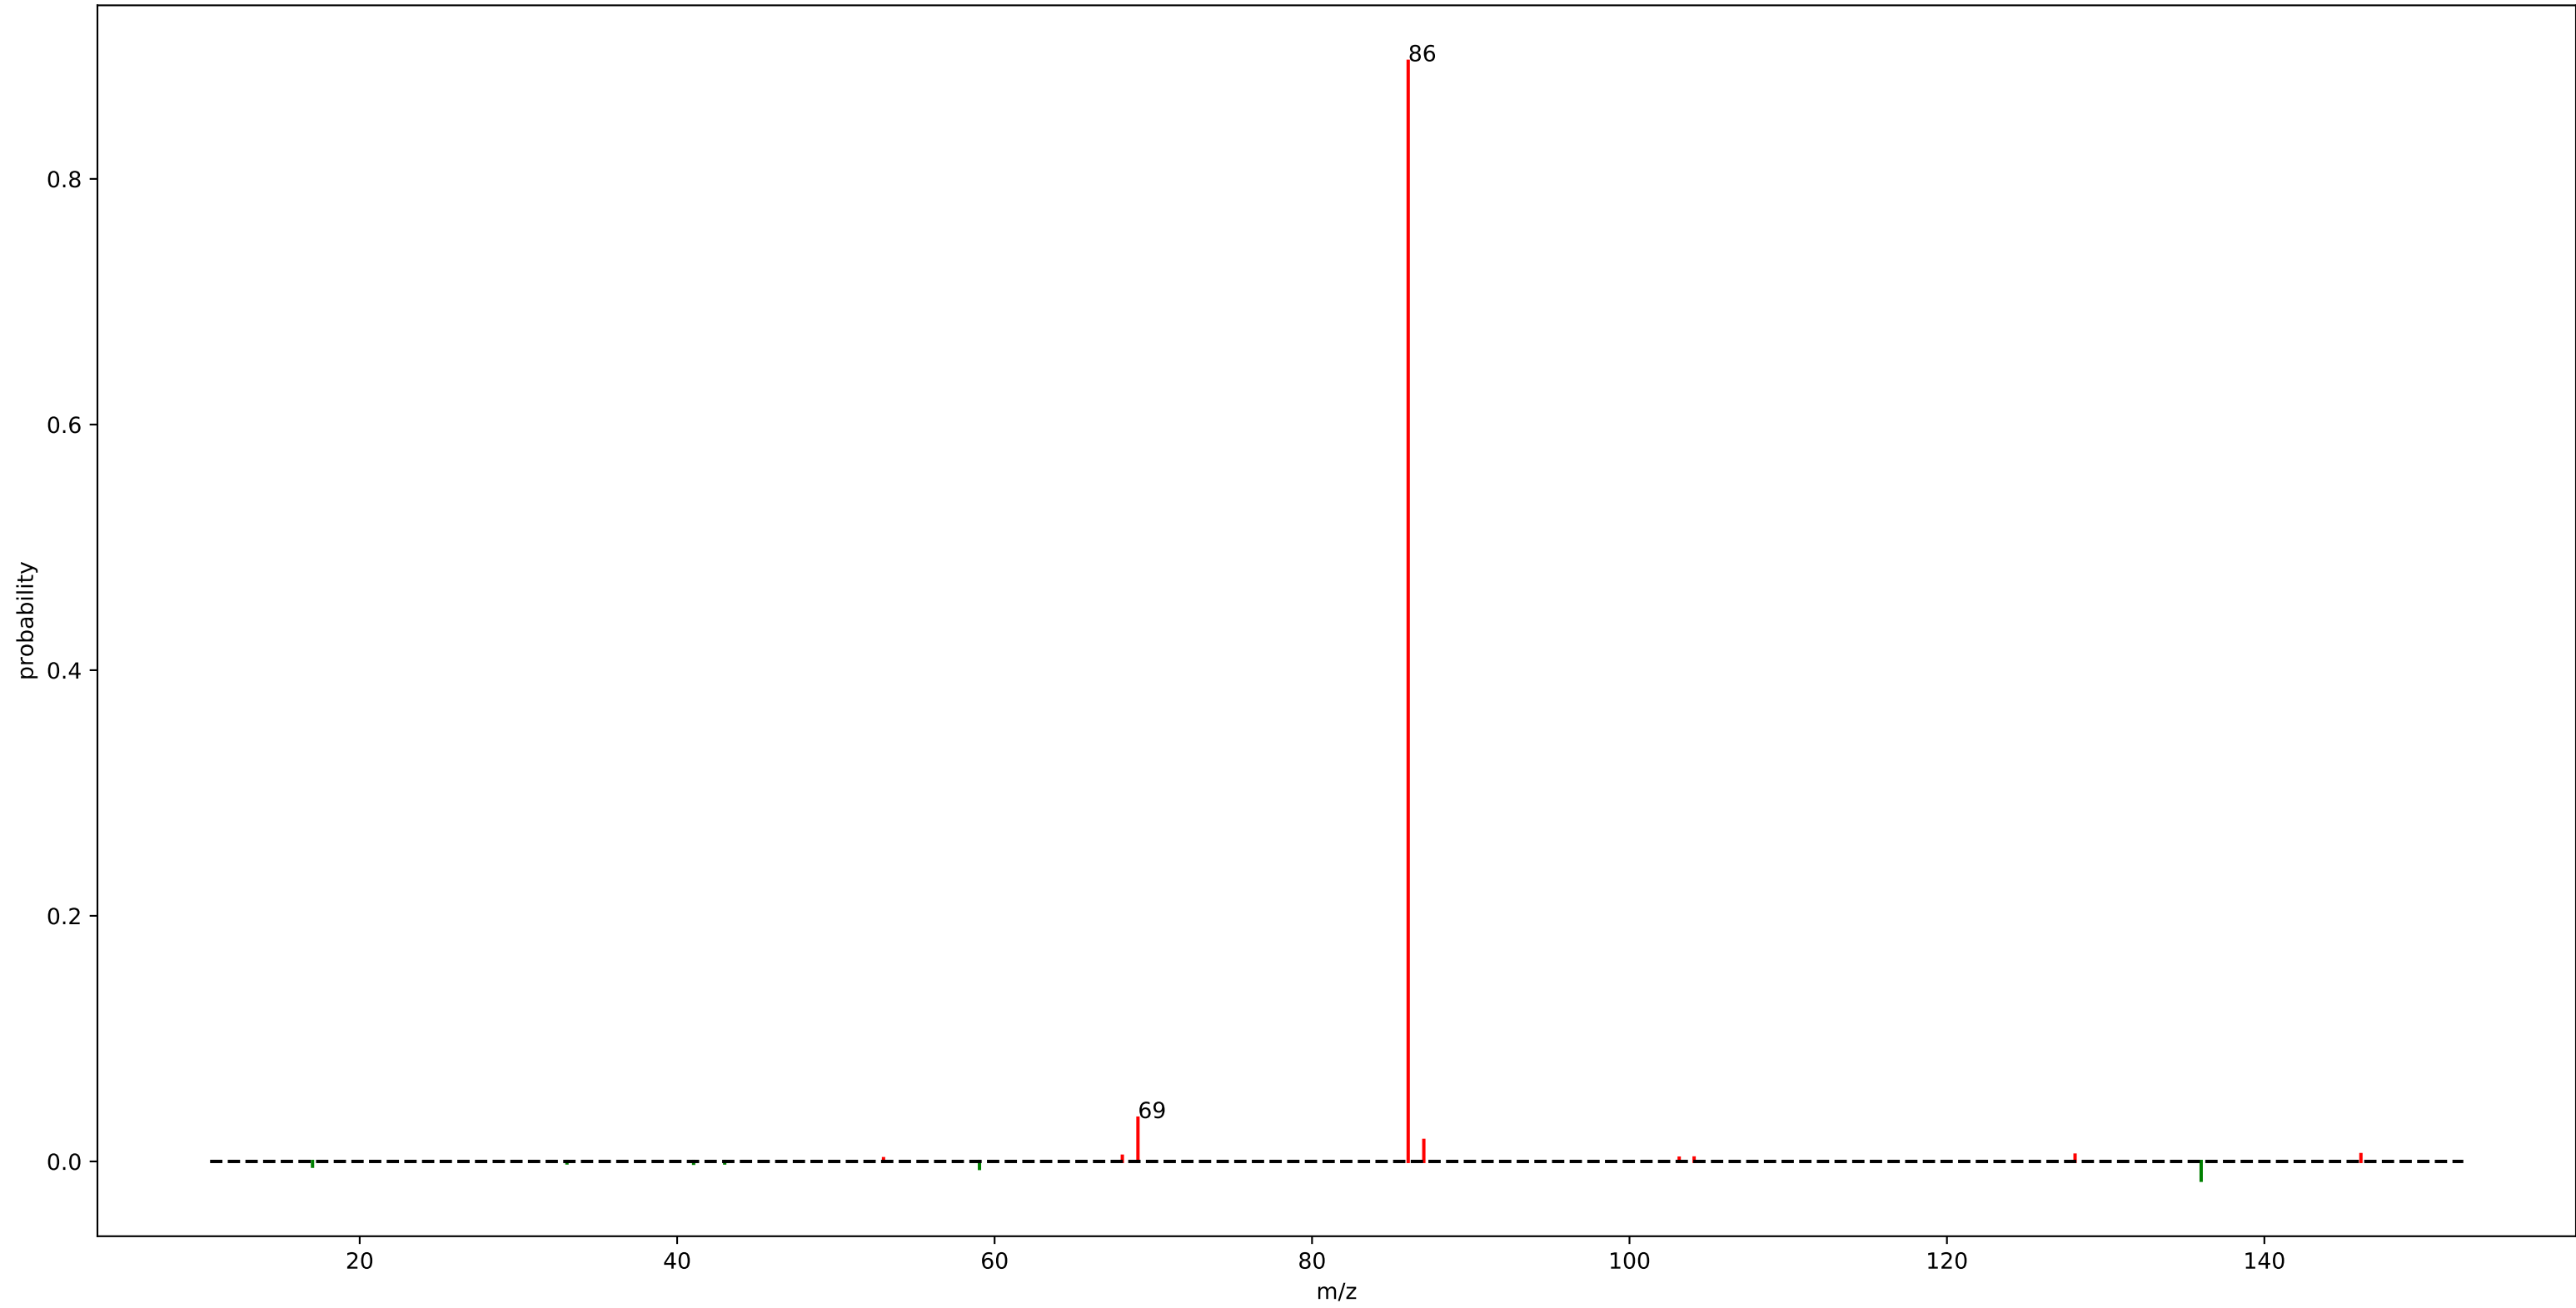

## urine\_mass2motif\_273.m2m

|                   |        |
|-------------------|--------|
| fragment_86.0575  | : 0.90 |
| fragment_69.0325  | : 0.04 |
| fragment_87.0425  | : 0.02 |
| loss_136.0175     | : 0.02 |
| loss_59.0475      | : 0.01 |
| fragment_146.0825 | : 0.01 |
| fragment_128.0725 | : 0.01 |

gnps\_motif\_15.m2m

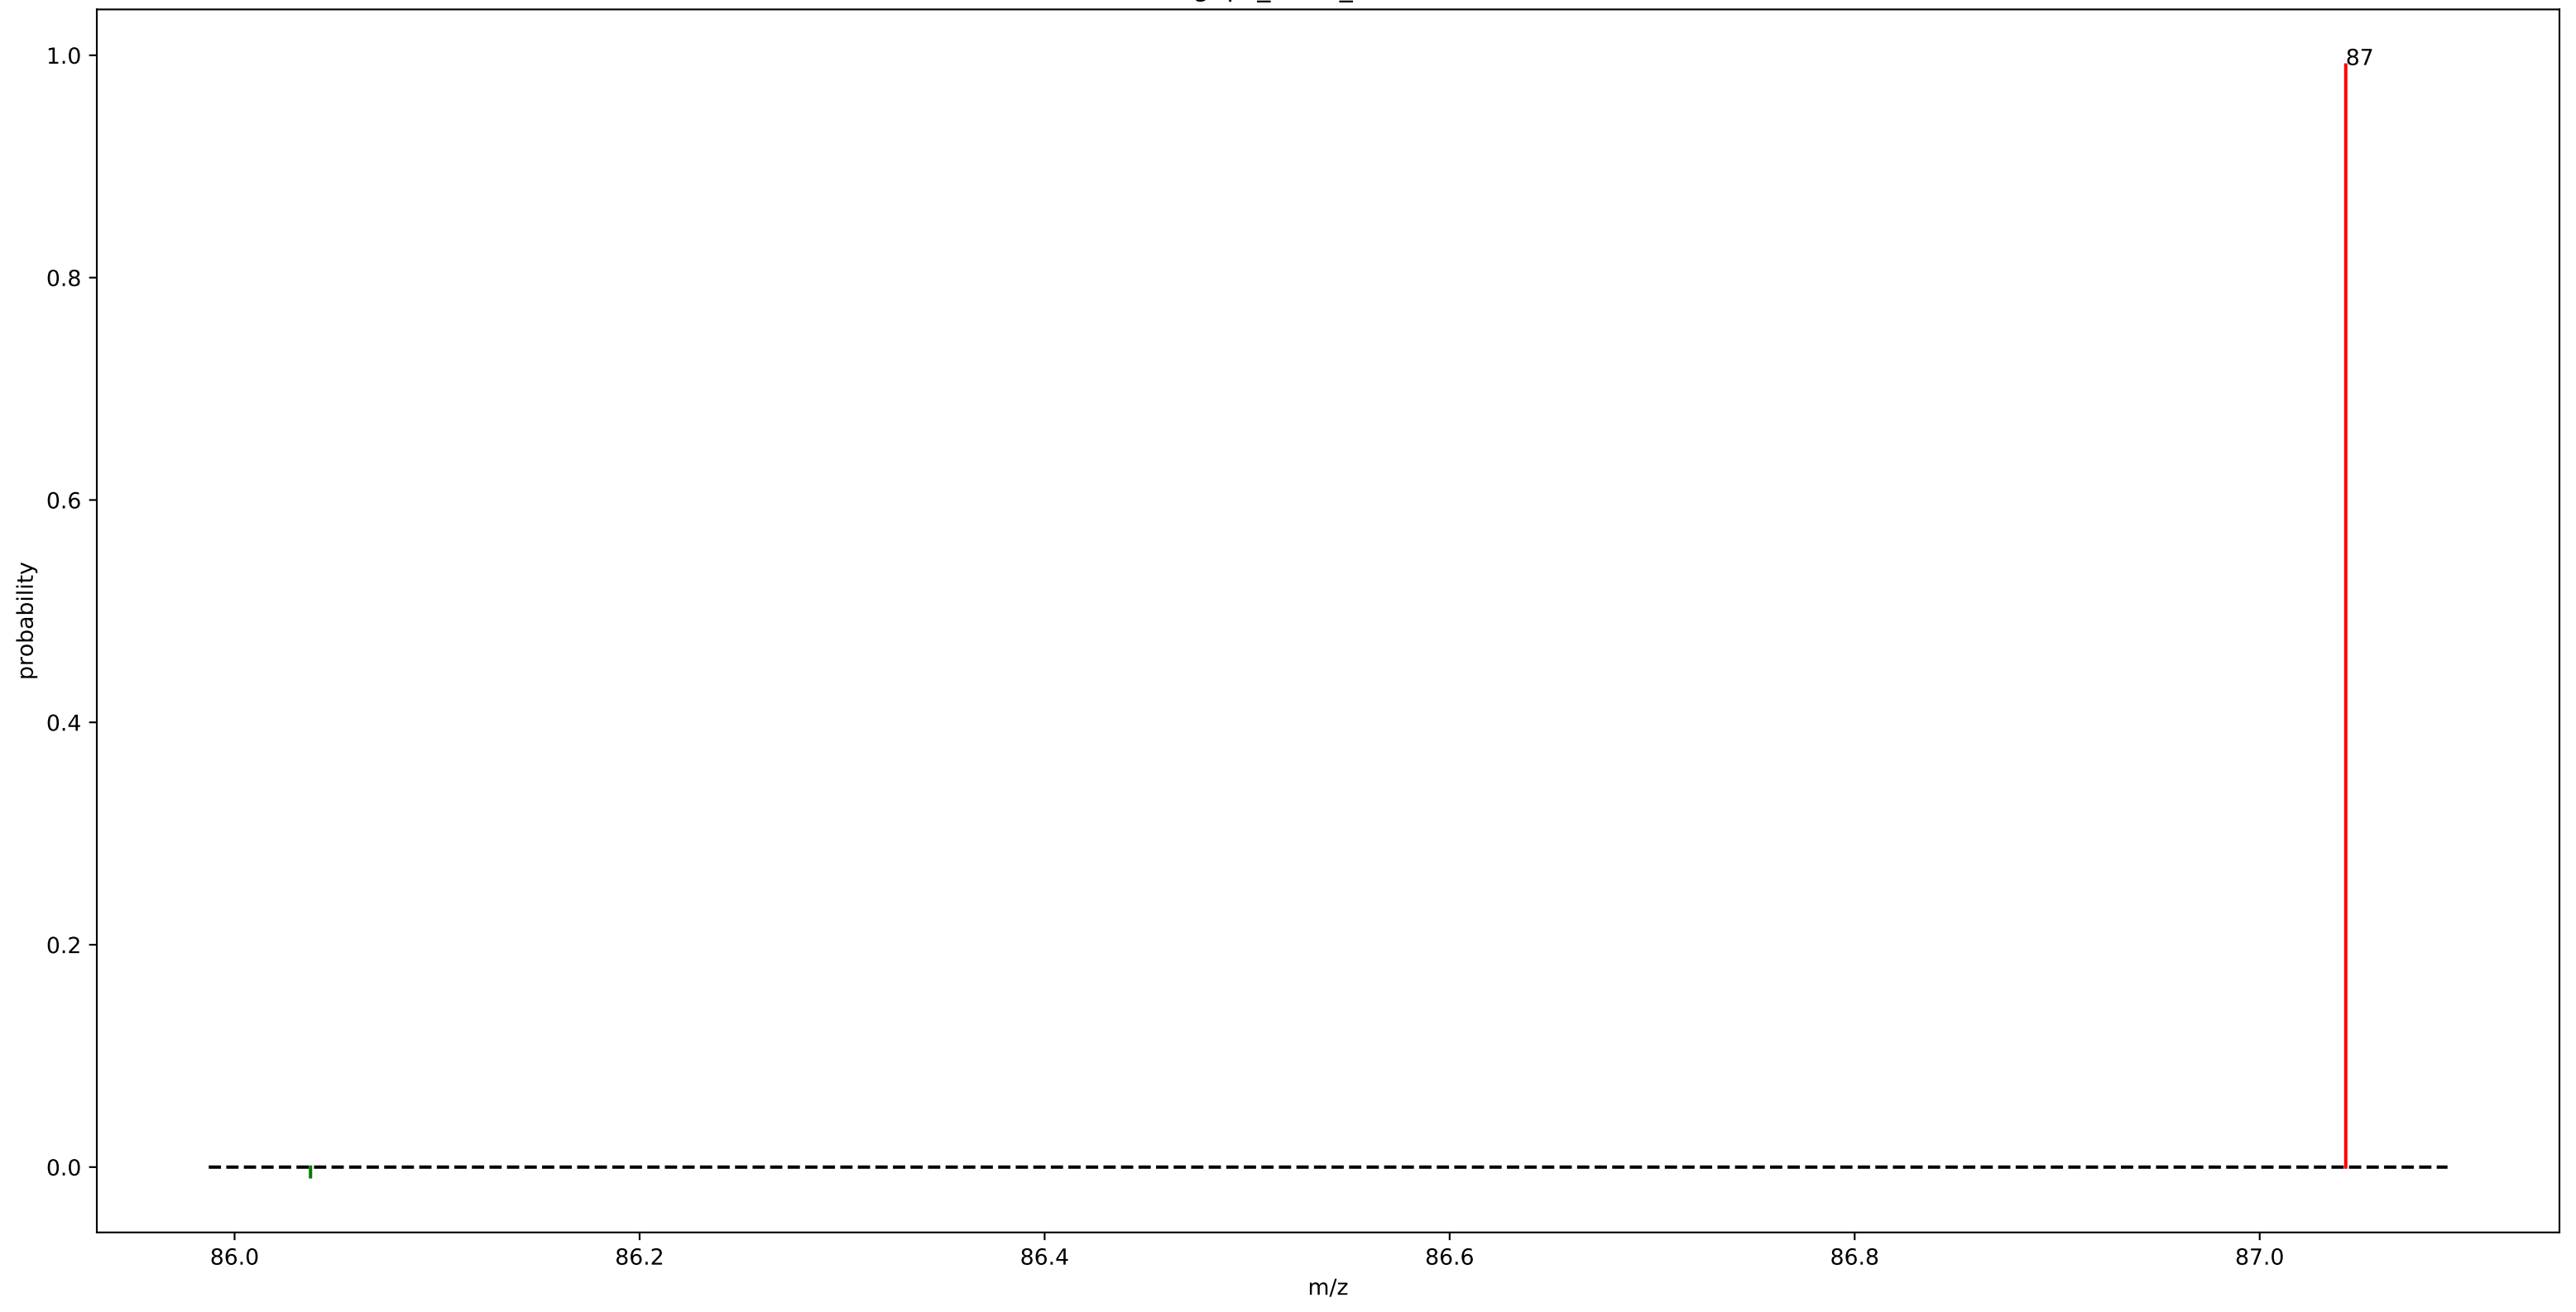

# gnps\_motif\_15.m2m

fragment\_87.0425 : 0.99  
loss\_86.0375 : 0.01

rhabdus\_motif\_221.m2m

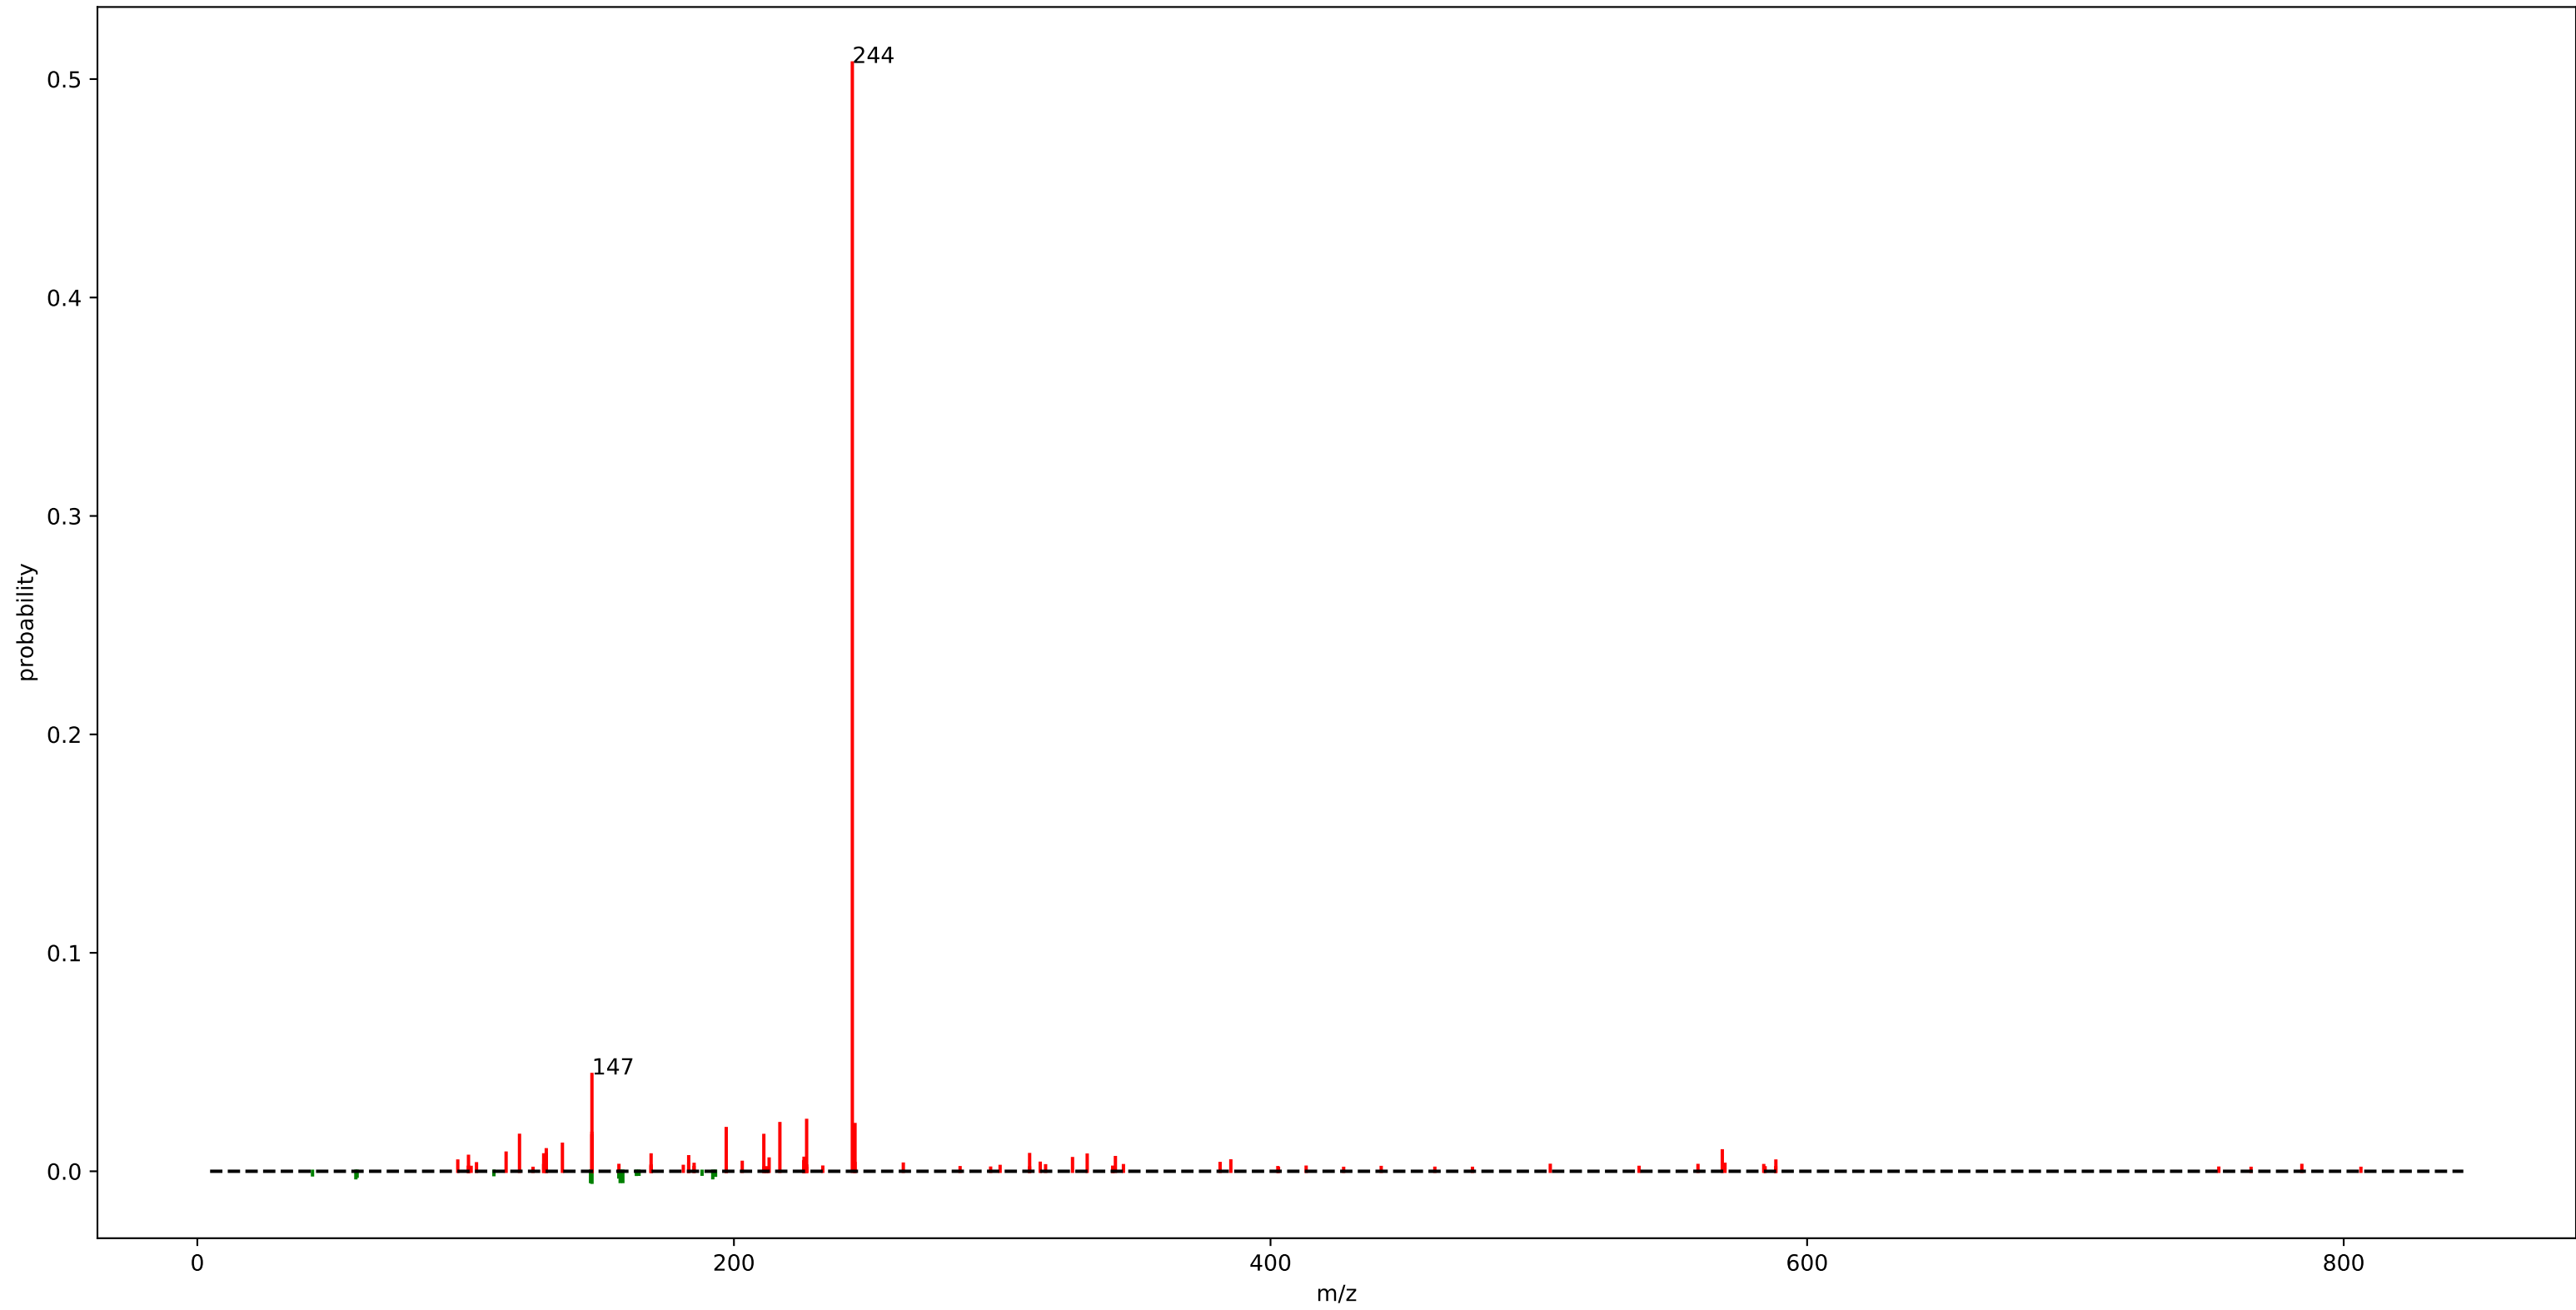

## rhabdus\_motif\_221.m2m

|                   |        |                   |        |
|-------------------|--------|-------------------|--------|
| fragment_244.1325 | : 0.51 | fragment_183.1425 | : 0.01 |
| fragment_147.0775 | : 0.04 | fragment_342.1825 | : 0.01 |
| fragment_227.1025 | : 0.02 | fragment_226.1275 | : 0.01 |
| fragment_217.1275 | : 0.02 | fragment_326.2025 | : 0.01 |
| fragment_245.1325 | : 0.02 | fragment_213.1175 | : 0.01 |
| fragment_197.1275 | : 0.02 | loss_147.0975     | : 0.01 |
| fragment_147.0725 | : 0.02 |                   |        |
| fragment_120.0775 | : 0.02 |                   |        |
| fragment_211.1425 | : 0.02 |                   |        |
| fragment_147.0825 | : 0.02 |                   |        |
| fragment_136.0725 | : 0.01 |                   |        |
| fragment_130.0575 | : 0.01 |                   |        |
| fragment_568.3825 | : 0.01 |                   |        |
| fragment_115.0825 | : 0.01 |                   |        |
| fragment_130.0525 | : 0.01 |                   |        |
| fragment_310.2125 | : 0.01 |                   |        |
| fragment_129.1025 | : 0.01 |                   |        |
| fragment_169.1275 | : 0.01 |                   |        |
| fragment_331.6725 | : 0.01 |                   |        |
| fragment_101.0675 | : 0.01 |                   |        |



urine\_mass2motif\_159.m2m

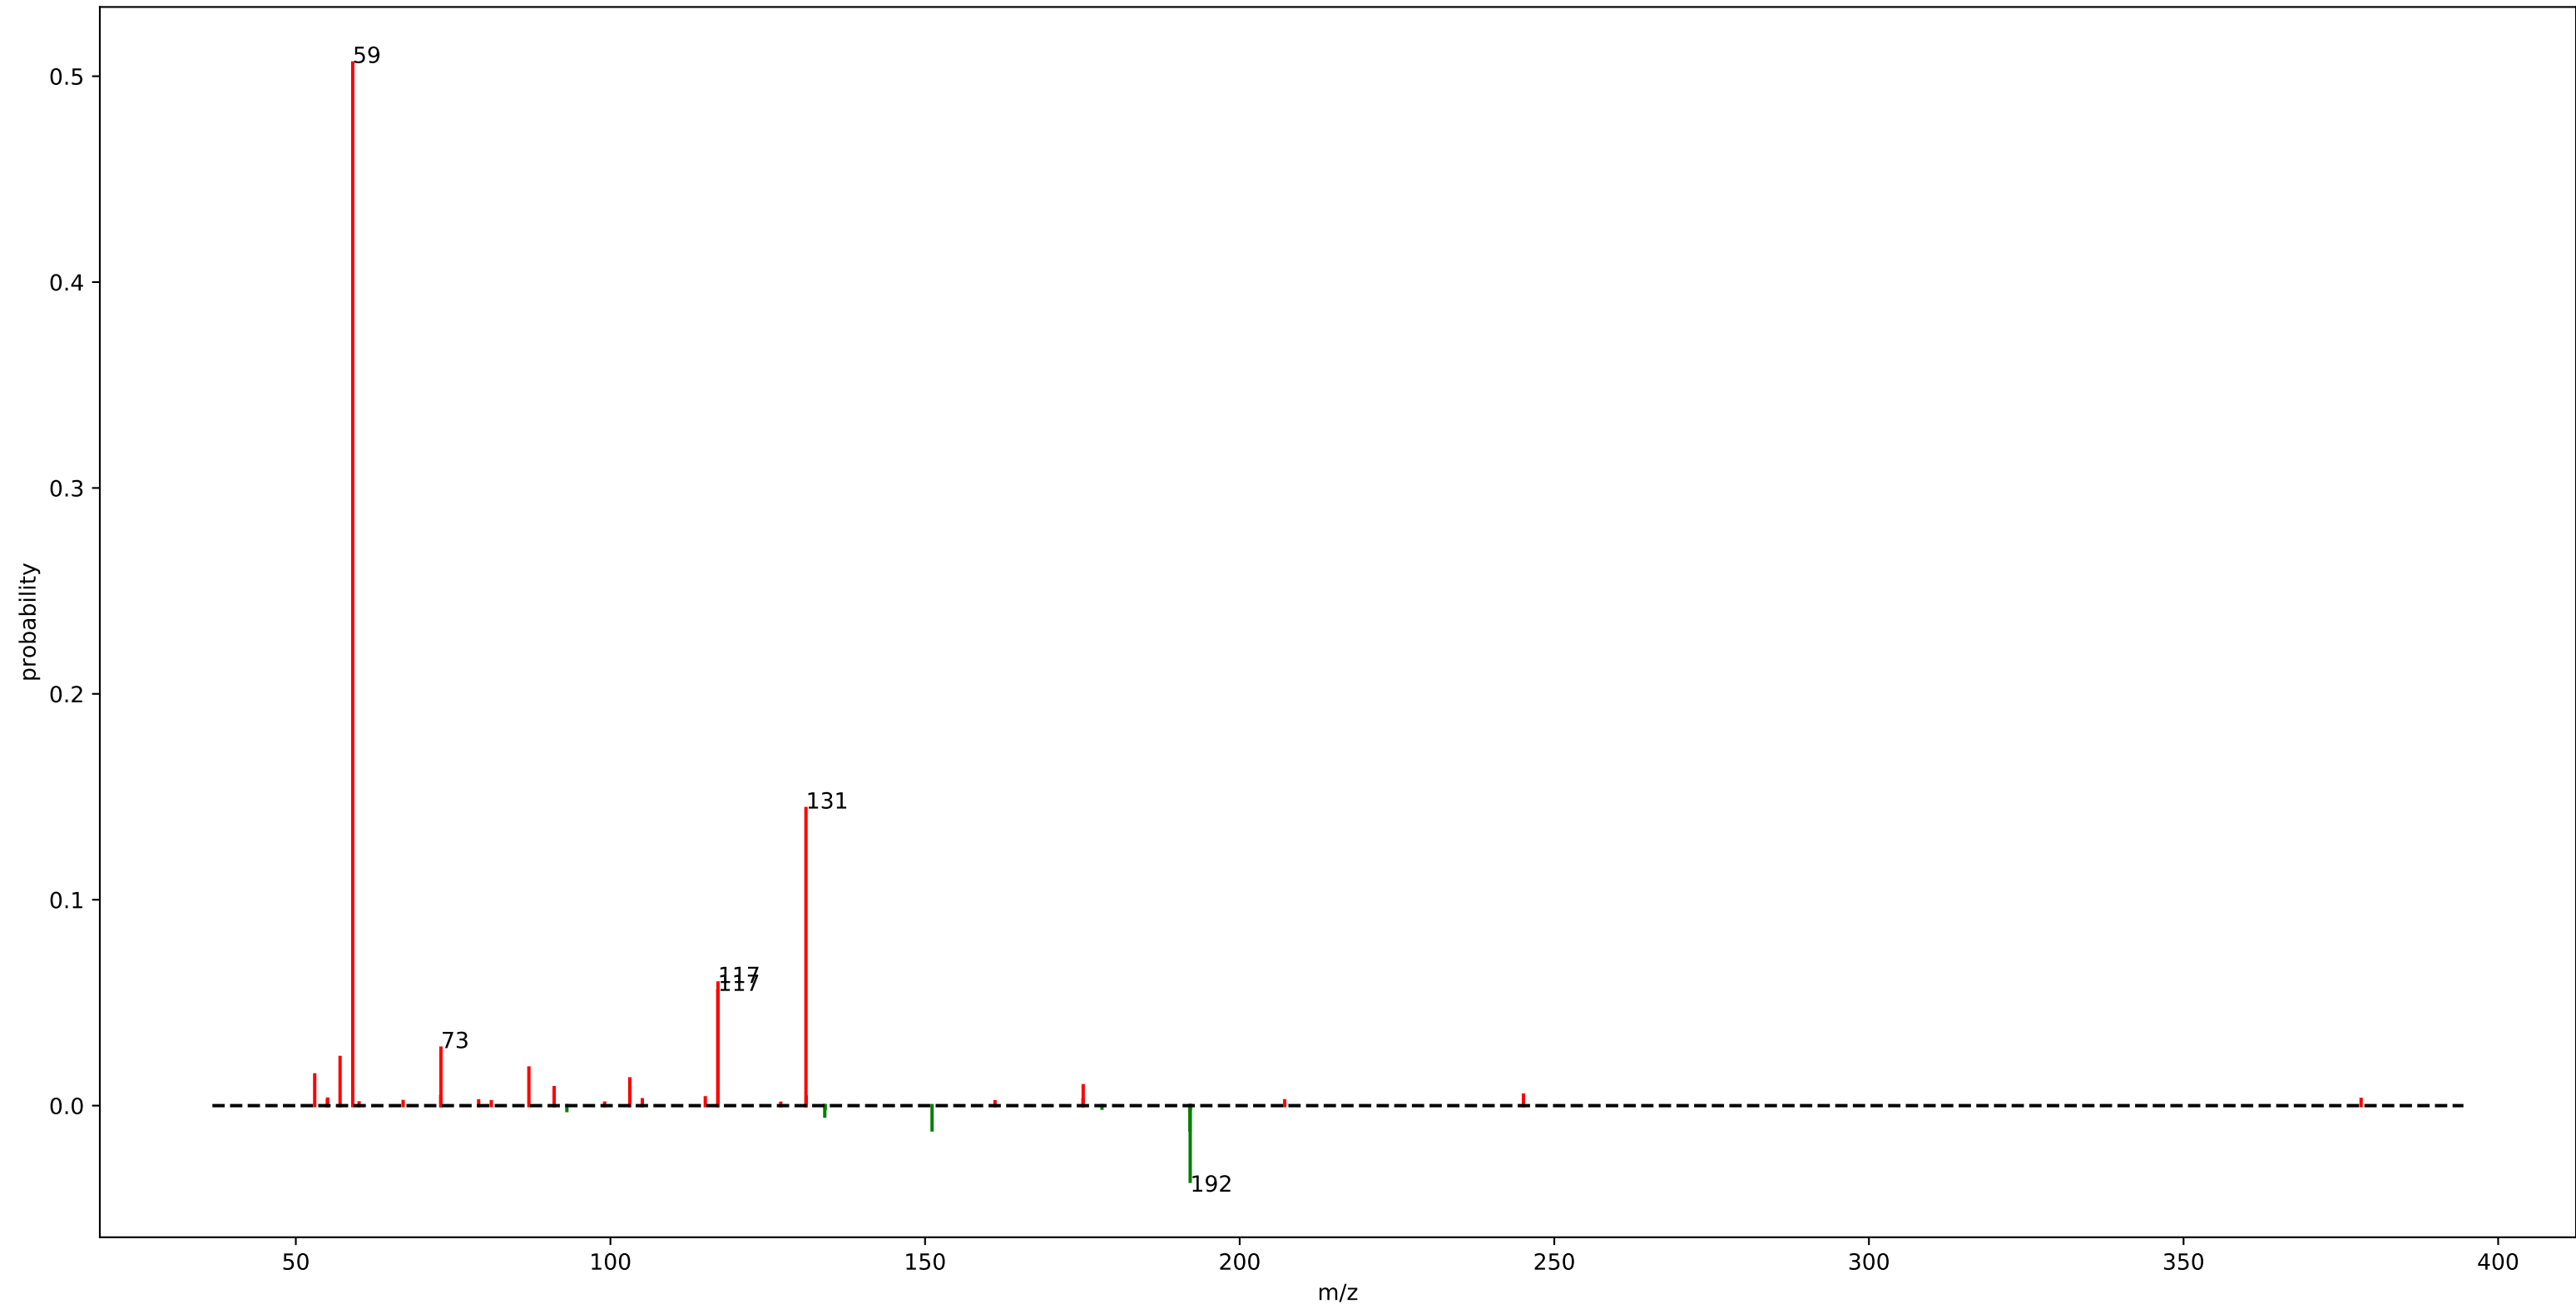

## urine\_mass2motif\_159.m2m

|                   |        |
|-------------------|--------|
| fragment_59.0475  | : 0.51 |
| fragment_131.0725 | : 0.14 |
| fragment_117.0925 | : 0.06 |
| fragment_117.0575 | : 0.06 |
| loss_192.1375     | : 0.04 |
| fragment_73.0625  | : 0.03 |
| fragment_57.0325  | : 0.02 |
| fragment_87.0425  | : 0.02 |
| fragment_53.0025  | : 0.01 |
| fragment_103.0775 | : 0.01 |
| loss_192.0925     | : 0.01 |
| loss_151.1125     | : 0.01 |
| fragment_175.1325 | : 0.01 |
| fragment_91.0525  | : 0.01 |
| fragment_245.0975 | : 0.01 |
| loss_134.0625     | : 0.01 |

rhabdus\_motif\_285.m2m

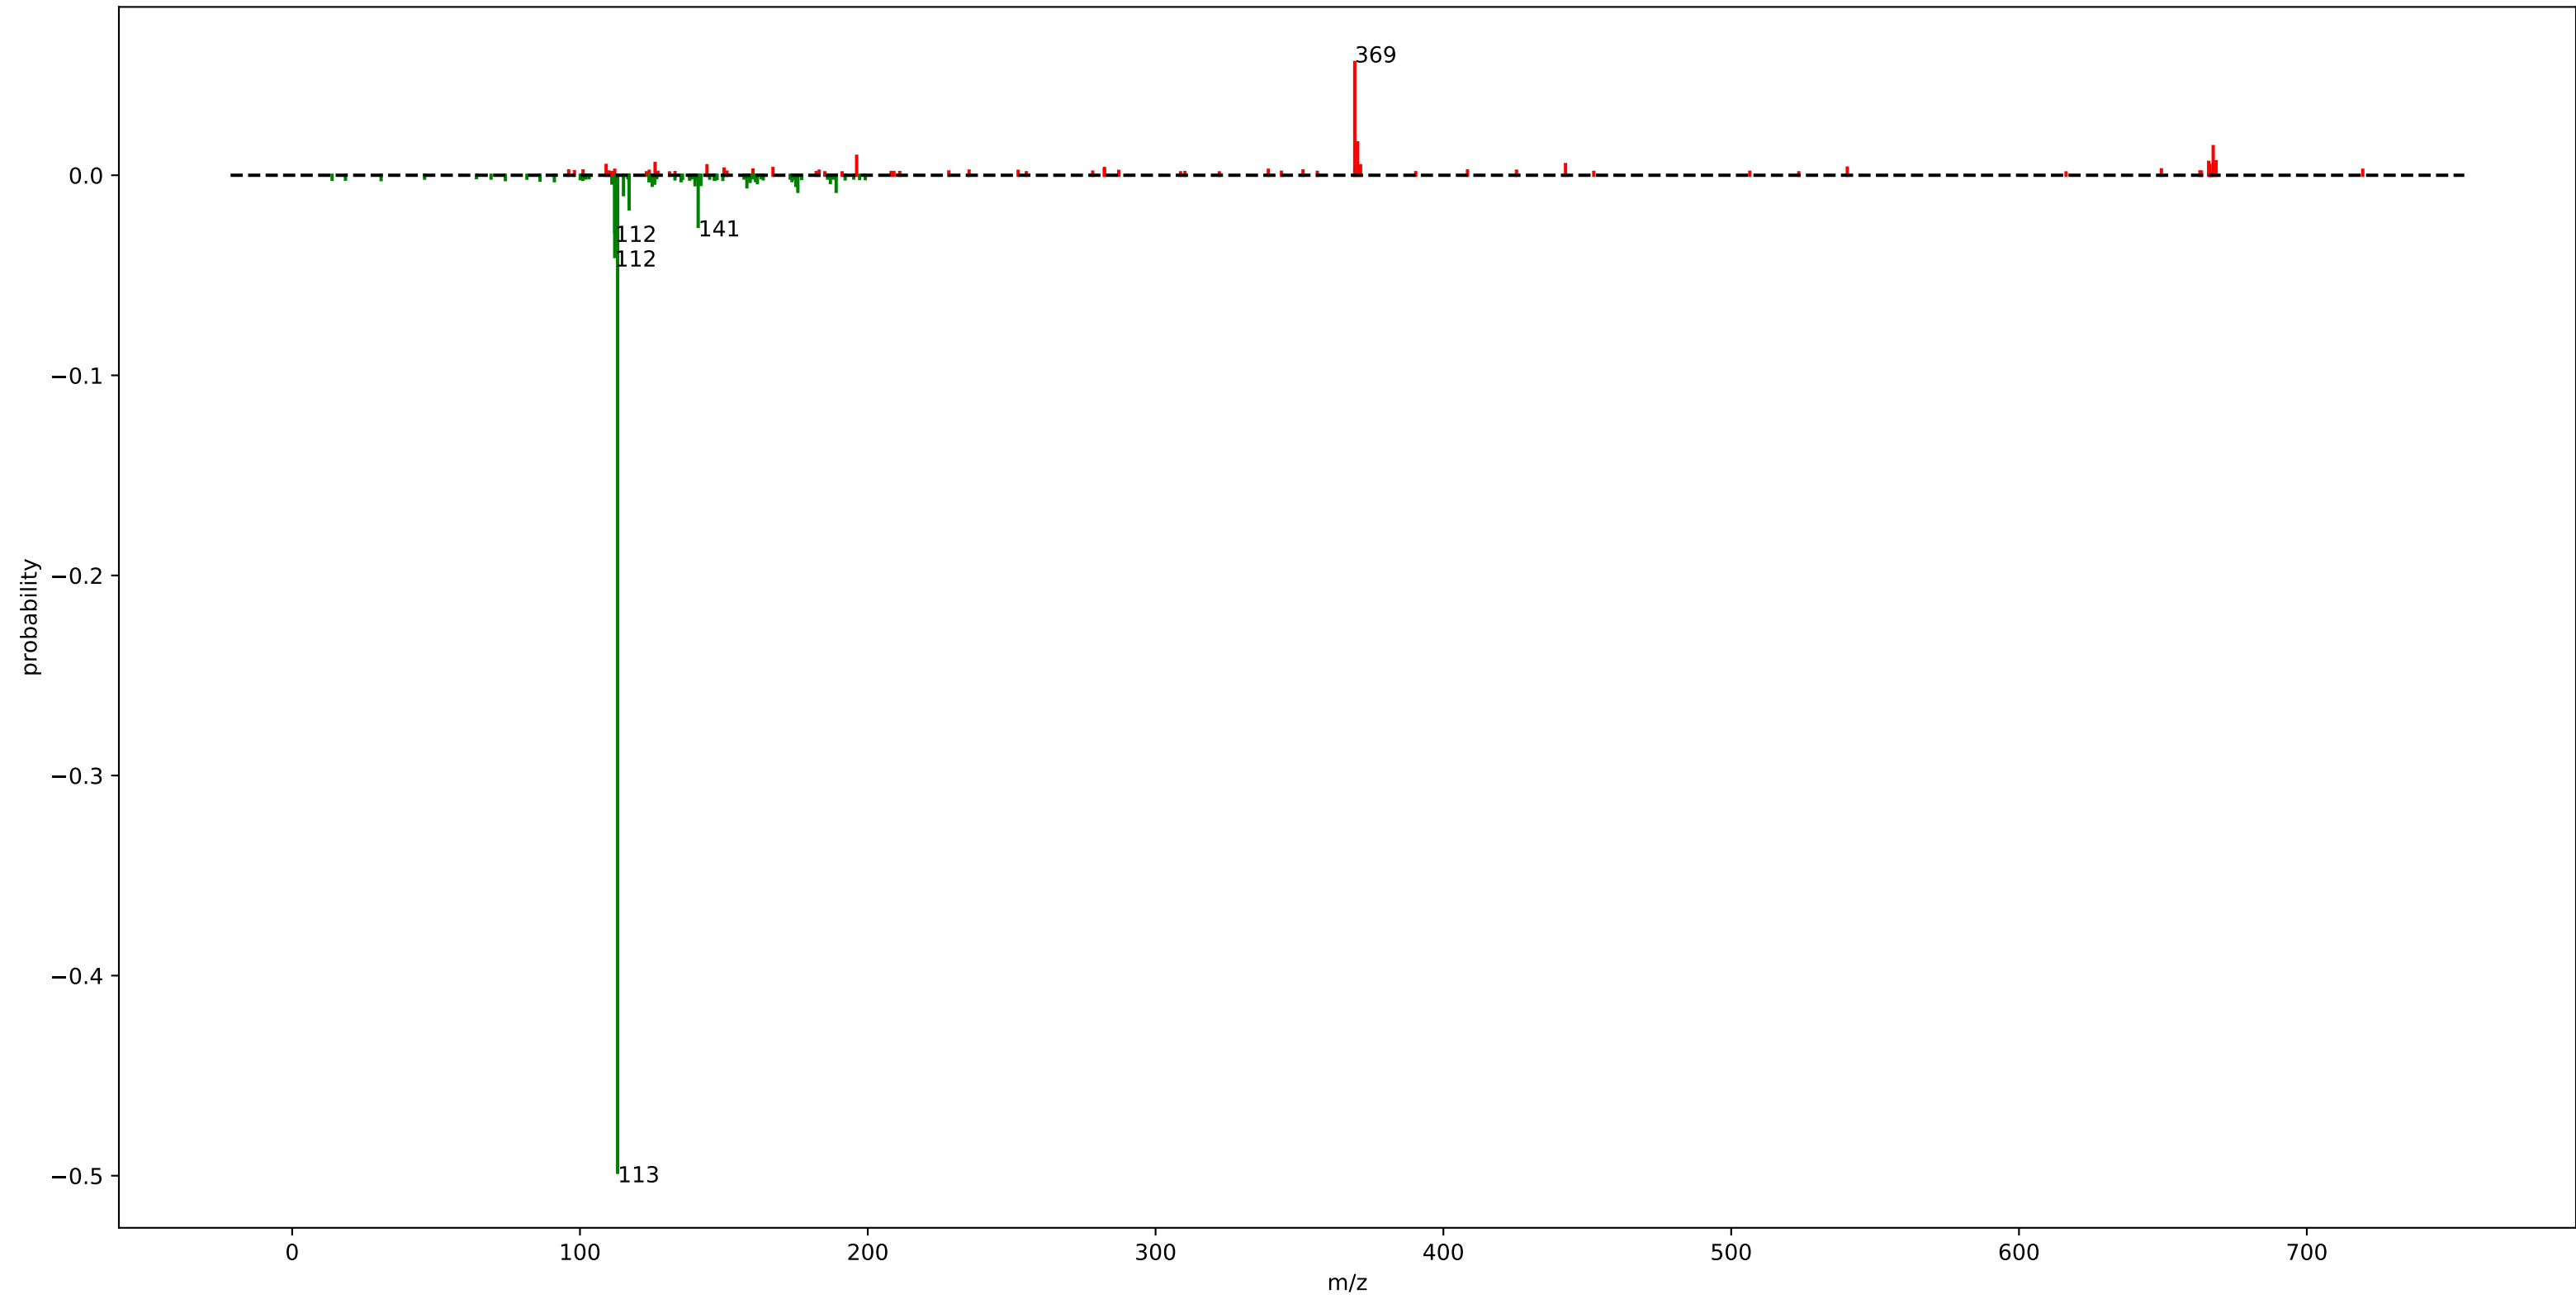

## rhabdus\_motif\_285.m2m

|                   |        |
|-------------------|--------|
| loss_113.0825     | : 0.50 |
| fragment_369.2125 | : 0.06 |
| loss_112.0775     | : 0.04 |
| loss_112.0825     | : 0.03 |
| loss_141.0775     | : 0.03 |
| loss_117.0775     | : 0.02 |
| fragment_370.2175 | : 0.02 |
| fragment_667.4775 | : 0.01 |
| loss_115.1175     | : 0.01 |
| fragment_196.1325 | : 0.01 |
| loss_189.0225     | : 0.01 |
| loss_175.7125     | : 0.01 |
| fragment_668.4825 | : 0.01 |
| fragment_665.8925 | : 0.01 |
| fragment_126.0975 | : 0.01 |
| loss_158.0025     | : 0.01 |
| fragment_442.4375 | : 0.01 |
| loss_175.0075     | : 0.01 |
| loss_125.1025     | : 0.01 |

euphorbia\_motif\_180.m2m

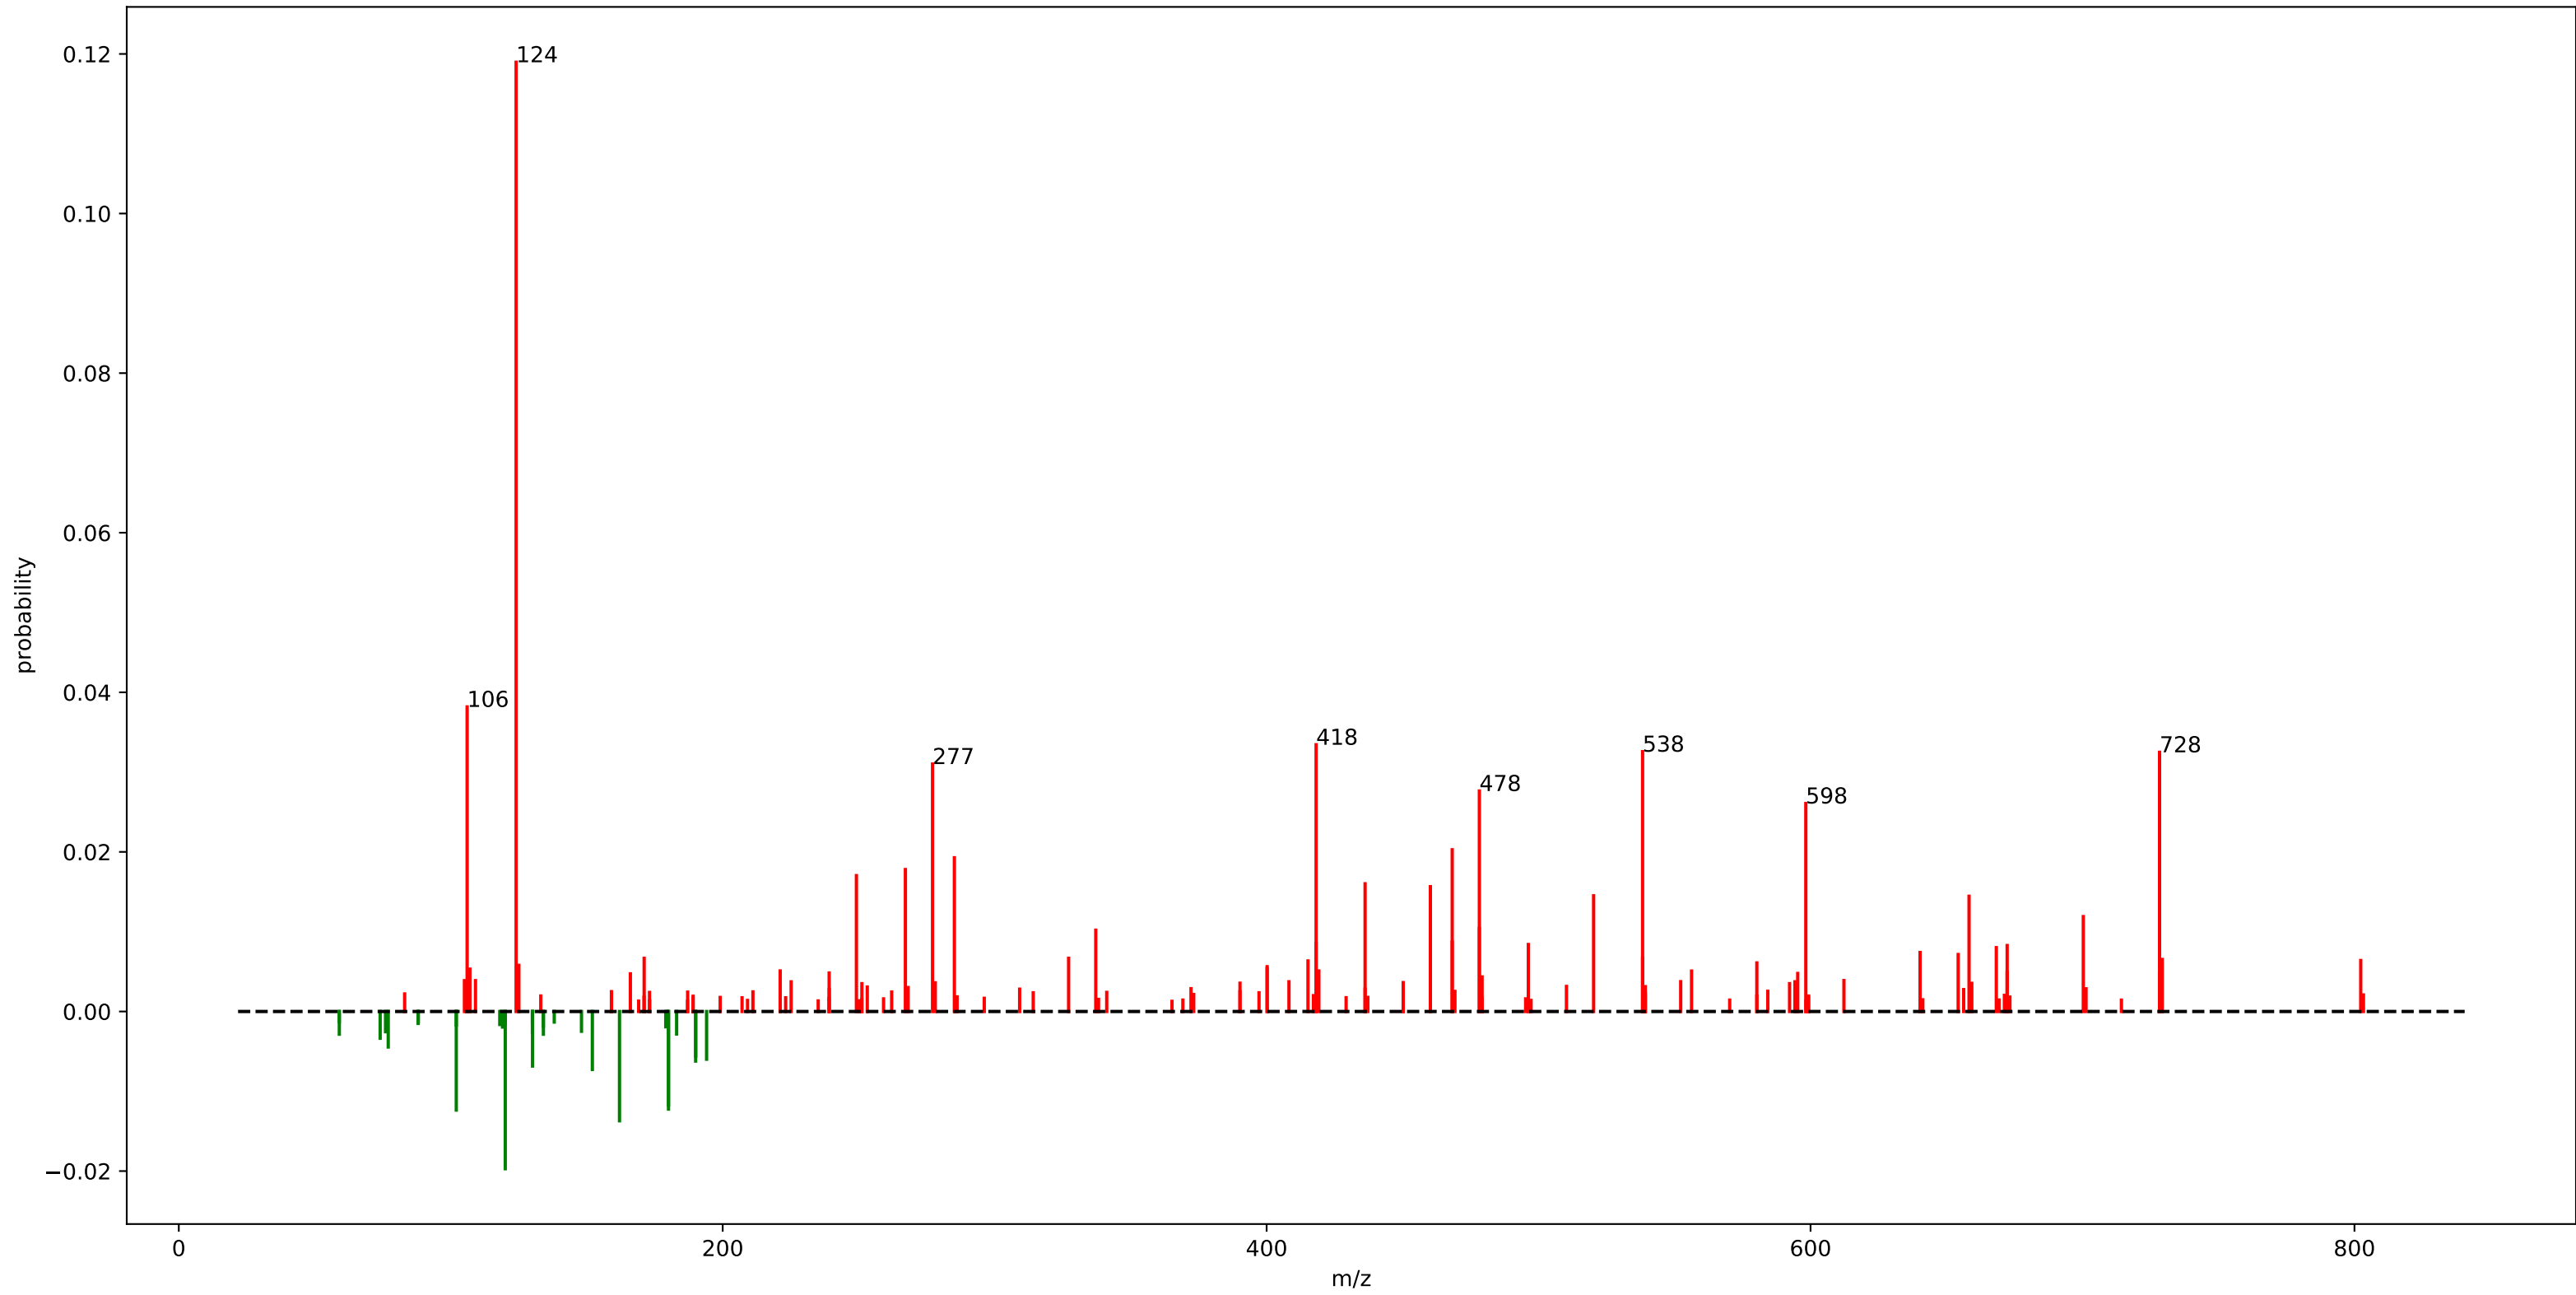

# euphorbia\_motif\_180.m2m

|                   |        |                   |        |                   |        |
|-------------------|--------|-------------------|--------|-------------------|--------|
| fragment_124.0375 | : 0.12 | fragment_700.2925 | : 0.01 | fragment_580.2525 | : 0.01 |
| fragment_106.0275 | : 0.04 | loss_180.0625     | : 0.01 | loss_194.0775     | : 0.01 |
| fragment_418.1975 | : 0.03 | fragment_478.2175 | : 0.01 | fragment_125.0425 | : 0.01 |
| fragment_538.2425 | : 0.03 | fragment_337.1775 | : 0.01 | fragment_400.1925 | : 0.01 |
| fragment_728.3325 | : 0.03 | fragment_468.2325 | : 0.01 | loss_190.0825     | : 0.01 |
| fragment_277.1575 | : 0.03 | fragment_418.2025 | : 0.01 | fragment_400.1875 | : 0.01 |
| fragment_478.2225 | : 0.03 | fragment_496.2325 | : 0.01 | fragment_107.0475 | : 0.01 |
| fragment_598.2625 | : 0.03 | fragment_672.2975 | : 0.01 | fragment_221.1325 | : 0.01 |
| fragment_468.2375 | : 0.02 | fragment_668.3075 | : 0.01 | fragment_419.2025 | : 0.01 |
| loss_120.0425     | : 0.02 | fragment_640.2725 | : 0.01 | fragment_556.2525 | : 0.01 |
| fragment_285.1825 | : 0.02 | loss_152.0675     | : 0.01 |                   |        |
| fragment_267.1725 | : 0.02 | fragment_654.2875 | : 0.01 |                   |        |
| fragment_249.1625 | : 0.02 | loss_130.0675     | : 0.01 |                   |        |
| fragment_436.2075 | : 0.02 | fragment_538.2375 | : 0.01 |                   |        |
| fragment_460.2125 | : 0.02 | fragment_327.1925 | : 0.01 |                   |        |
| fragment_520.2325 | : 0.01 | fragment_171.1175 | : 0.01 |                   |        |
| fragment_658.2825 | : 0.01 | fragment_729.3325 | : 0.01 |                   |        |
| loss_162.0525     | : 0.01 | fragment_802.3075 | : 0.01 |                   |        |
| loss_102.0325     | : 0.01 | fragment_415.2075 | : 0.01 |                   |        |
| loss_180.0675     | : 0.01 | loss_190.0475     | : 0.01 |                   |        |

gnps\_motif\_14.m2m

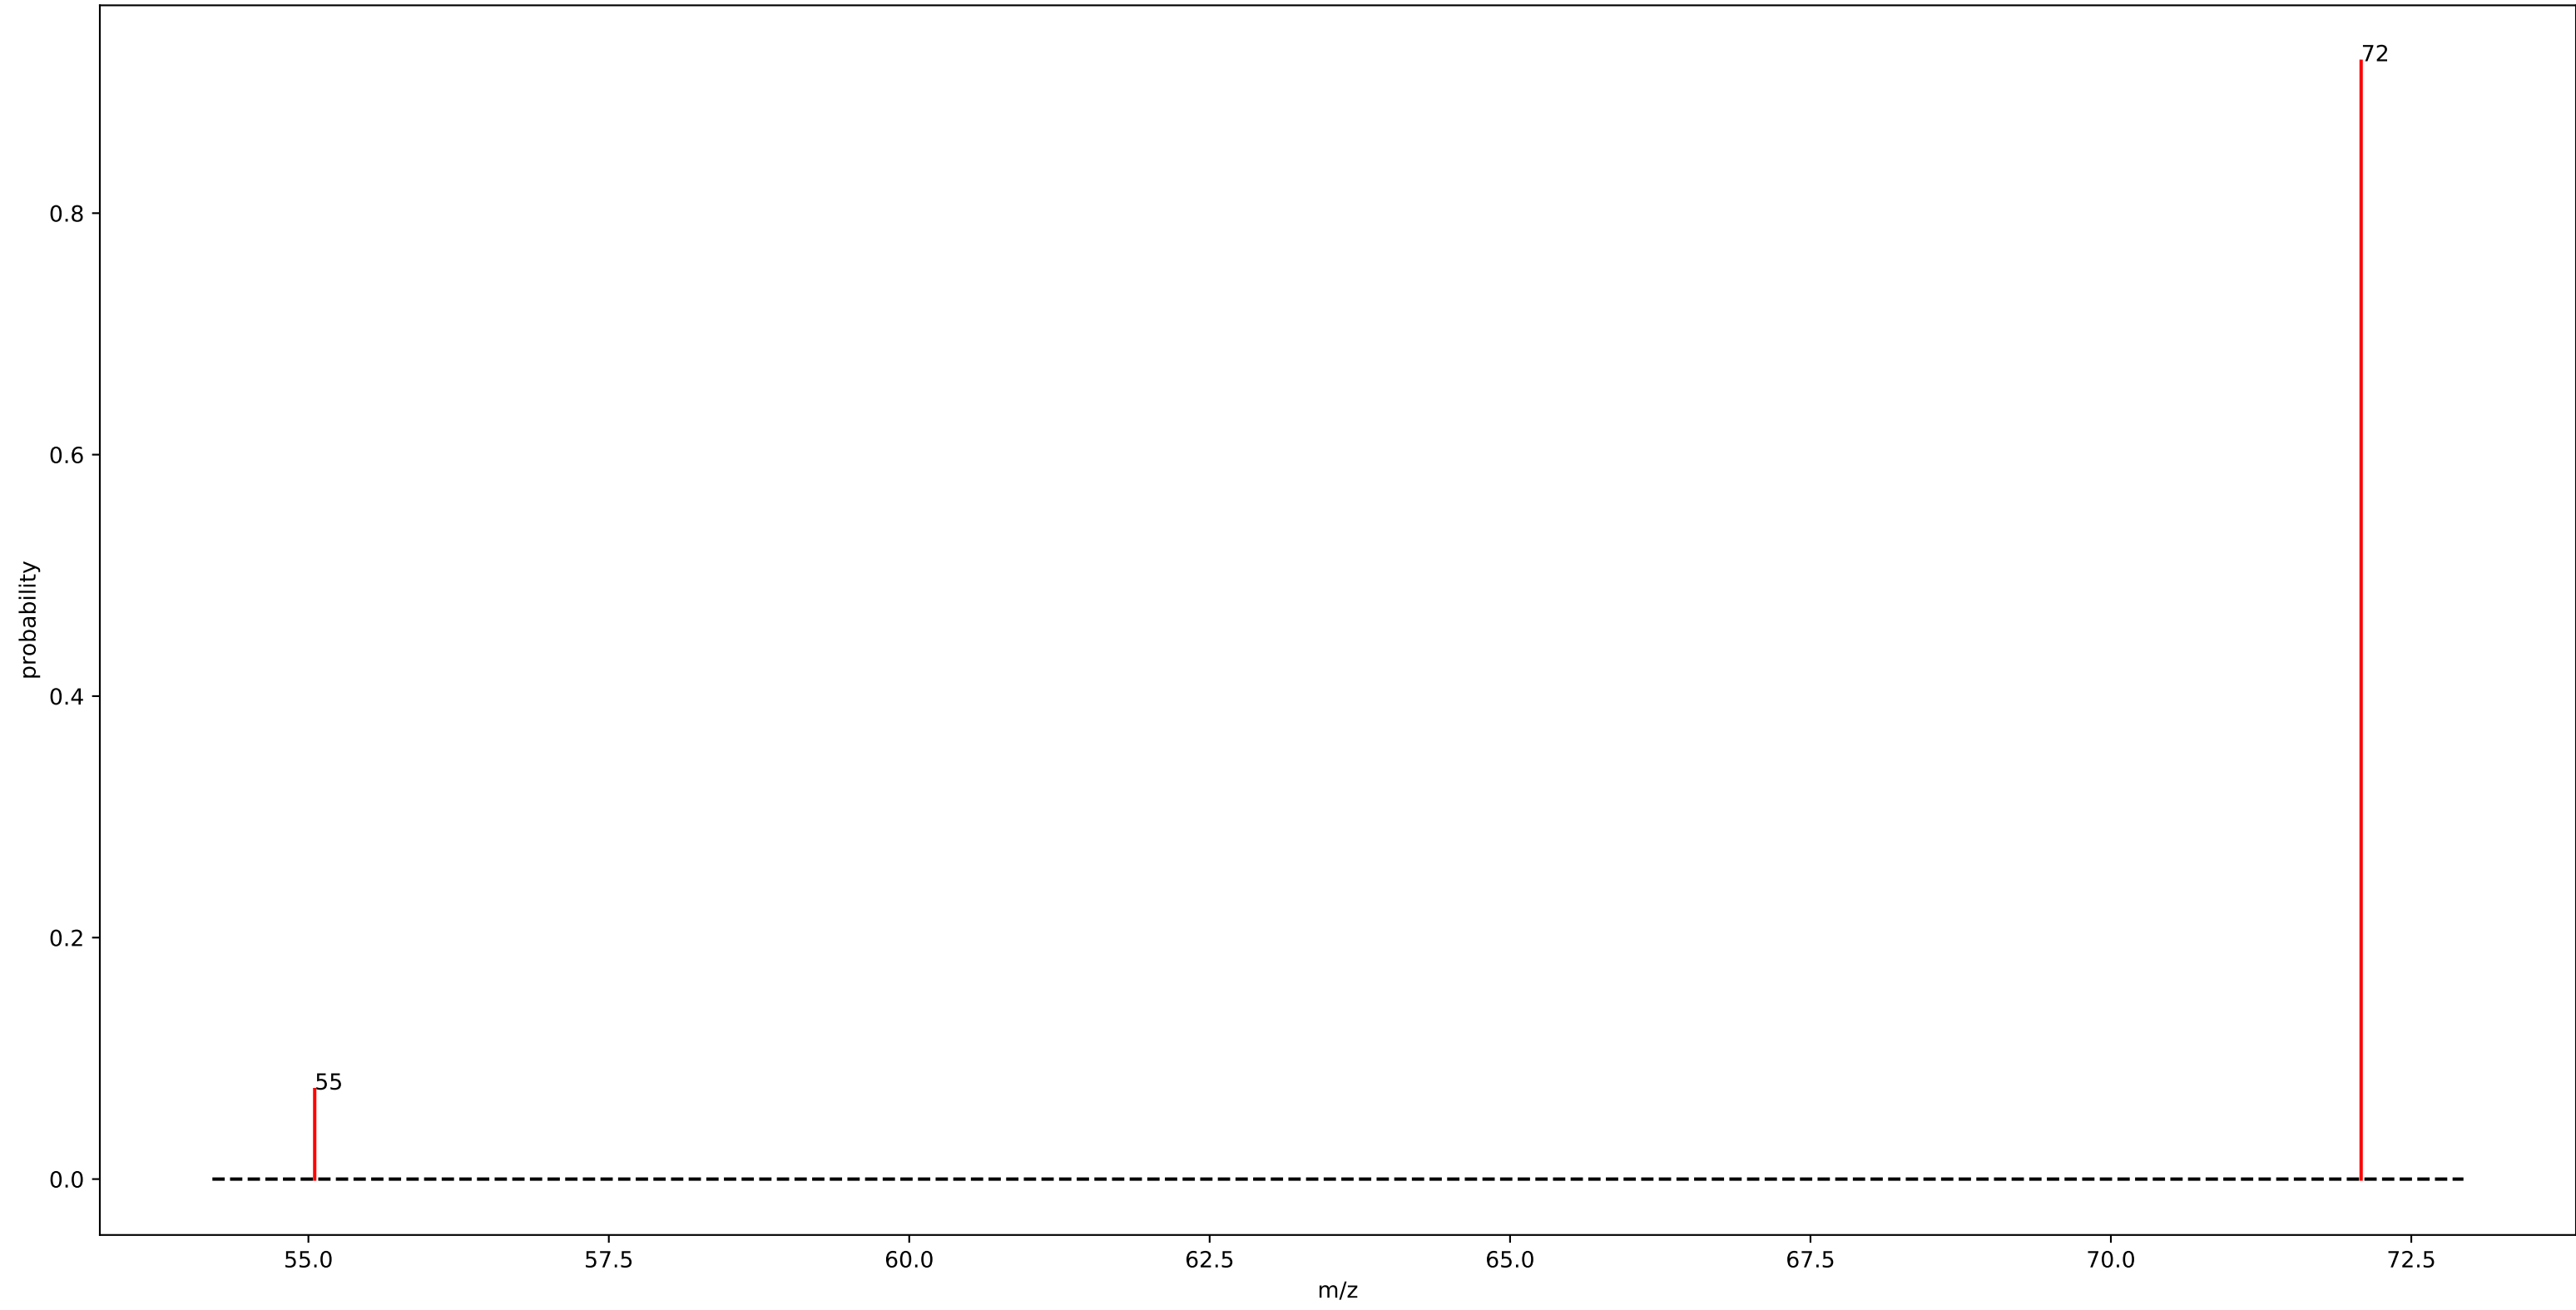

# gnps\_motif\_14.m2m

fragment\_72.0825 : 0.93  
fragment\_55.0525 : 0.07



urine\_mass2motif\_247.m2m

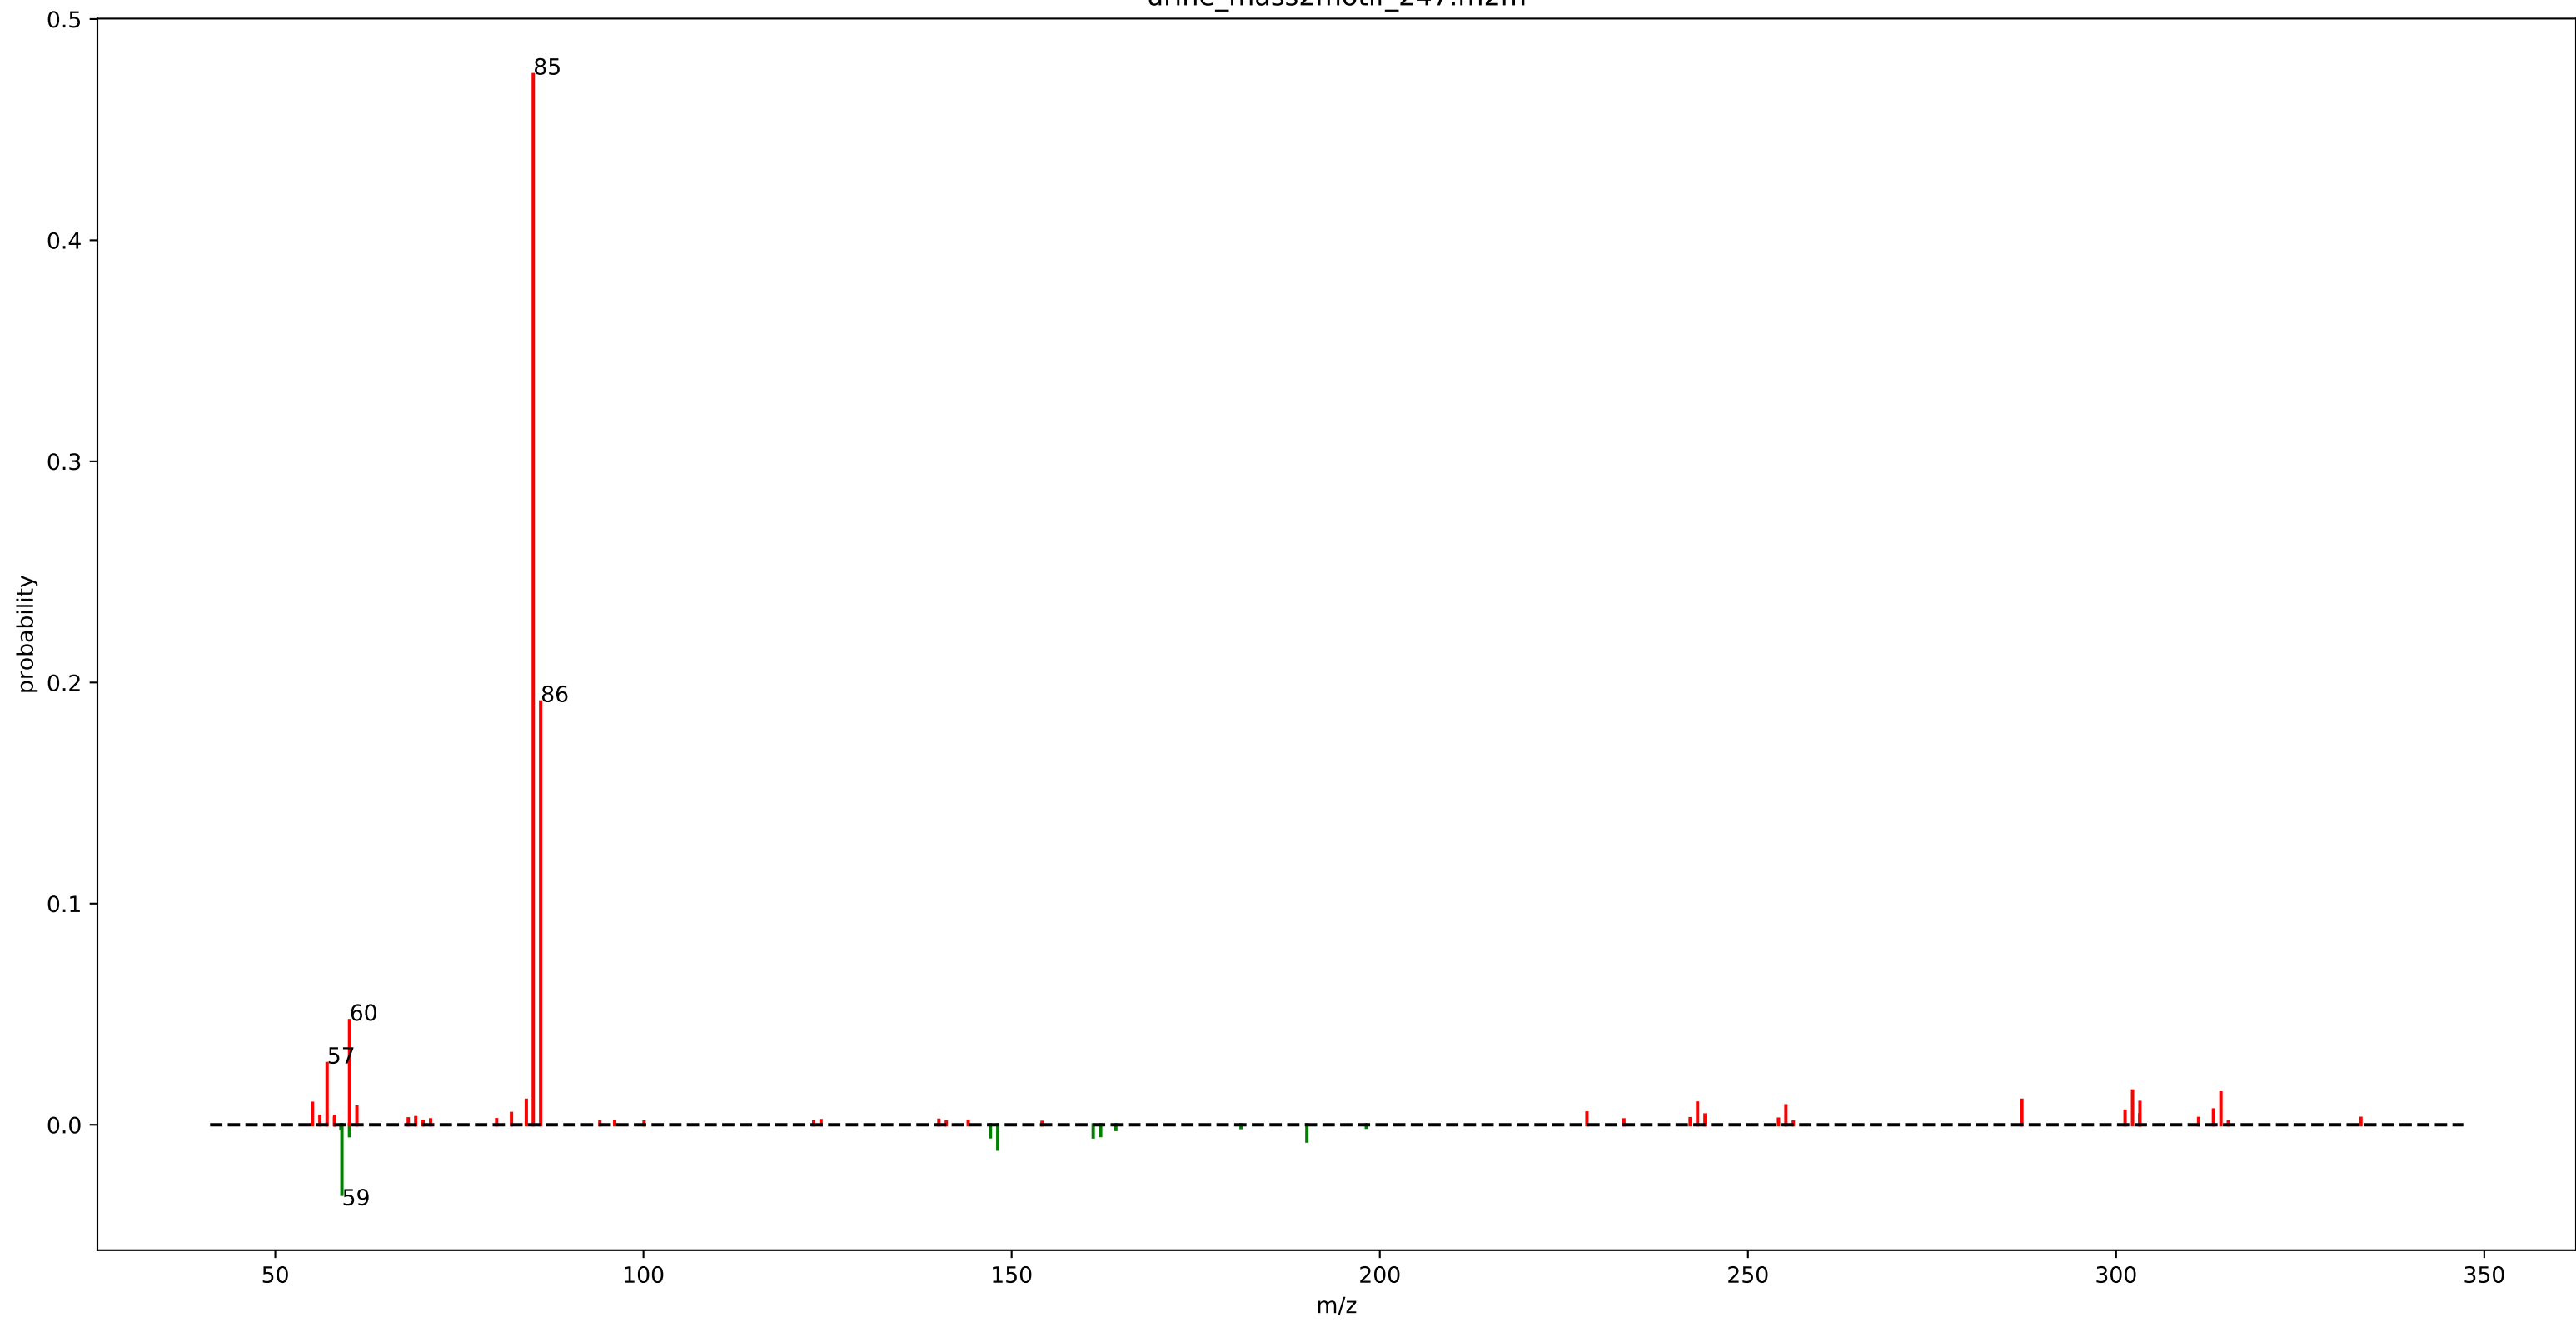

# urine\_mass2motif\_247.m2m

|                   |        |                   |        |
|-------------------|--------|-------------------|--------|
| fragment_85.0275  | : 0.47 | fragment_228.1325 | : 0.01 |
| fragment_86.0325  | : 0.19 | fragment_82.0725  | : 0.01 |
| fragment_60.0825  | : 0.05 |                   |        |
| loss_59.0475      | : 0.03 |                   |        |
| fragment_57.0325  | : 0.03 |                   |        |
| fragment_302.2325 | : 0.02 |                   |        |
| fragment_314.2325 | : 0.01 |                   |        |
| fragment_287.2025 | : 0.01 |                   |        |
| fragment_84.0825  | : 0.01 |                   |        |
| loss_148.1225     | : 0.01 |                   |        |
| fragment_303.2375 | : 0.01 |                   |        |
| fragment_243.1575 | : 0.01 |                   |        |
| fragment_55.0525  | : 0.01 |                   |        |
| fragment_255.1575 | : 0.01 |                   |        |
| fragment_61.0825  | : 0.01 |                   |        |
| loss_190.0975     | : 0.01 |                   |        |
| fragment_313.2175 | : 0.01 |                   |        |
| fragment_301.2175 | : 0.01 |                   |        |
| loss_161.0825     | : 0.01 |                   |        |
| loss_147.1225     | : 0.01 |                   |        |

urine\_mass2motif\_237.m2m

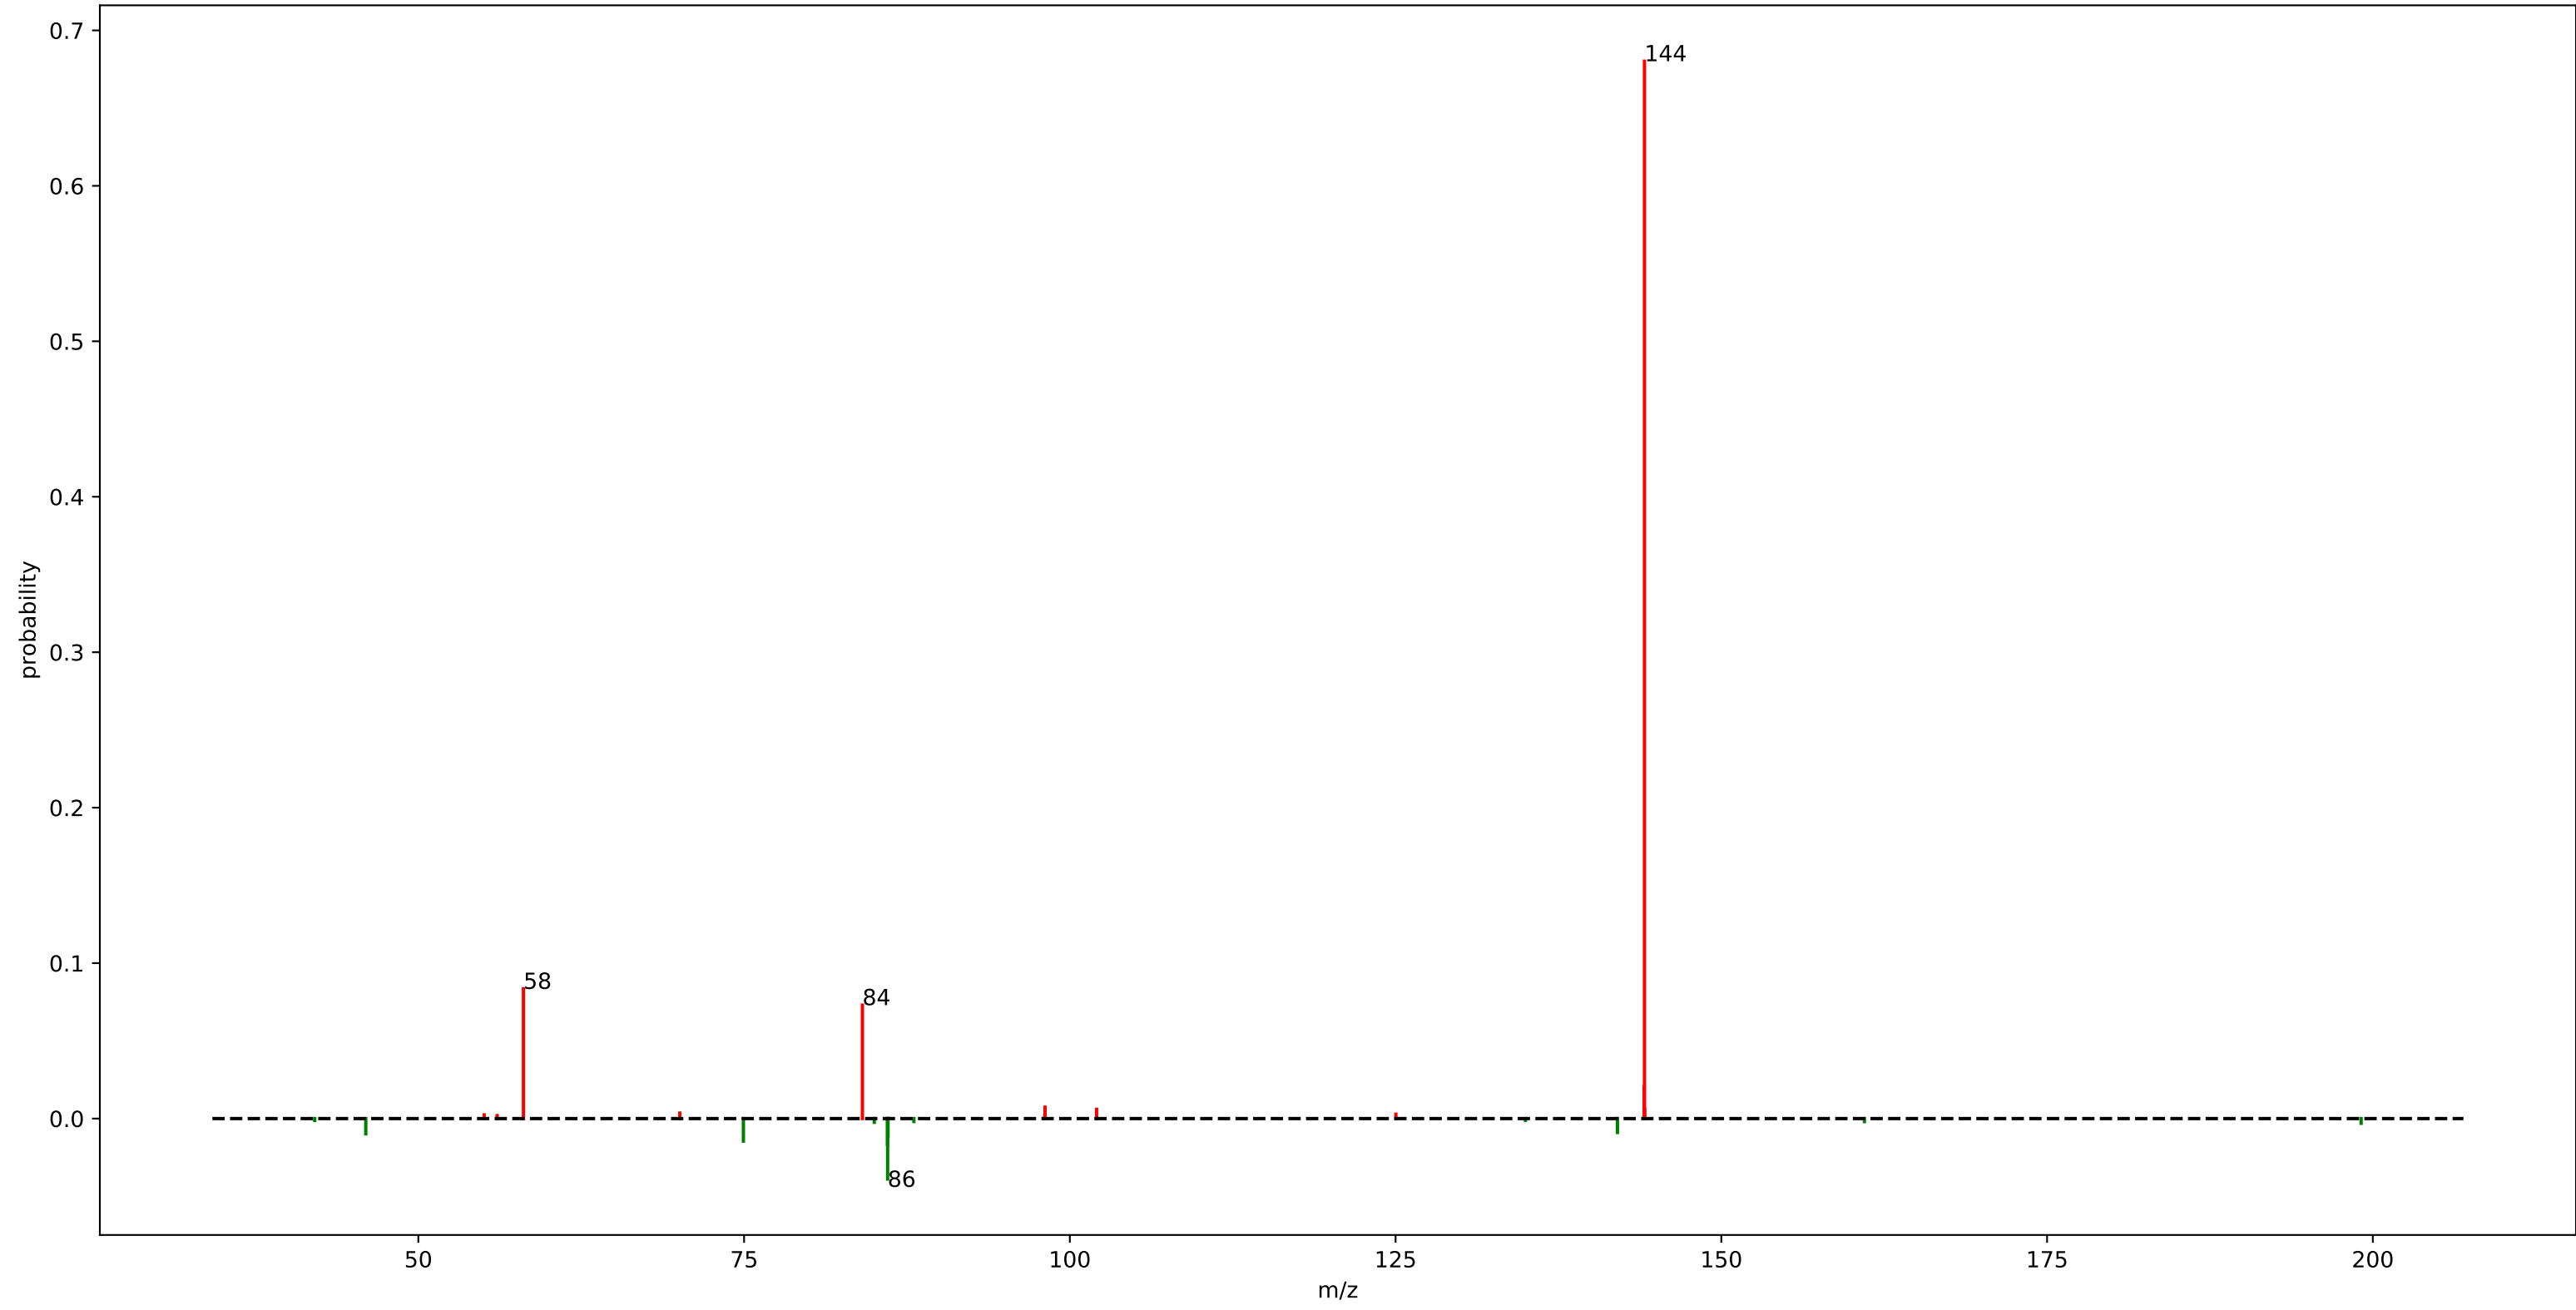

## urine\_mass2motif\_237.m2m

|                   |        |
|-------------------|--------|
| fragment_144.1025 | : 0.68 |
| fragment_58.0675  | : 0.08 |
| fragment_84.0825  | : 0.07 |
| loss_86.0175      | : 0.04 |
| fragment_144.0825 | : 0.02 |
| loss_86.0025      | : 0.02 |
| loss_74.9475      | : 0.01 |
| loss_86.0475      | : 0.01 |
| loss_45.9675      | : 0.01 |
| loss_142.0275     | : 0.01 |
| fragment_98.0975  | : 0.01 |
| fragment_102.0525 | : 0.01 |
| fragment_144.1225 | : 0.01 |

motif\_563

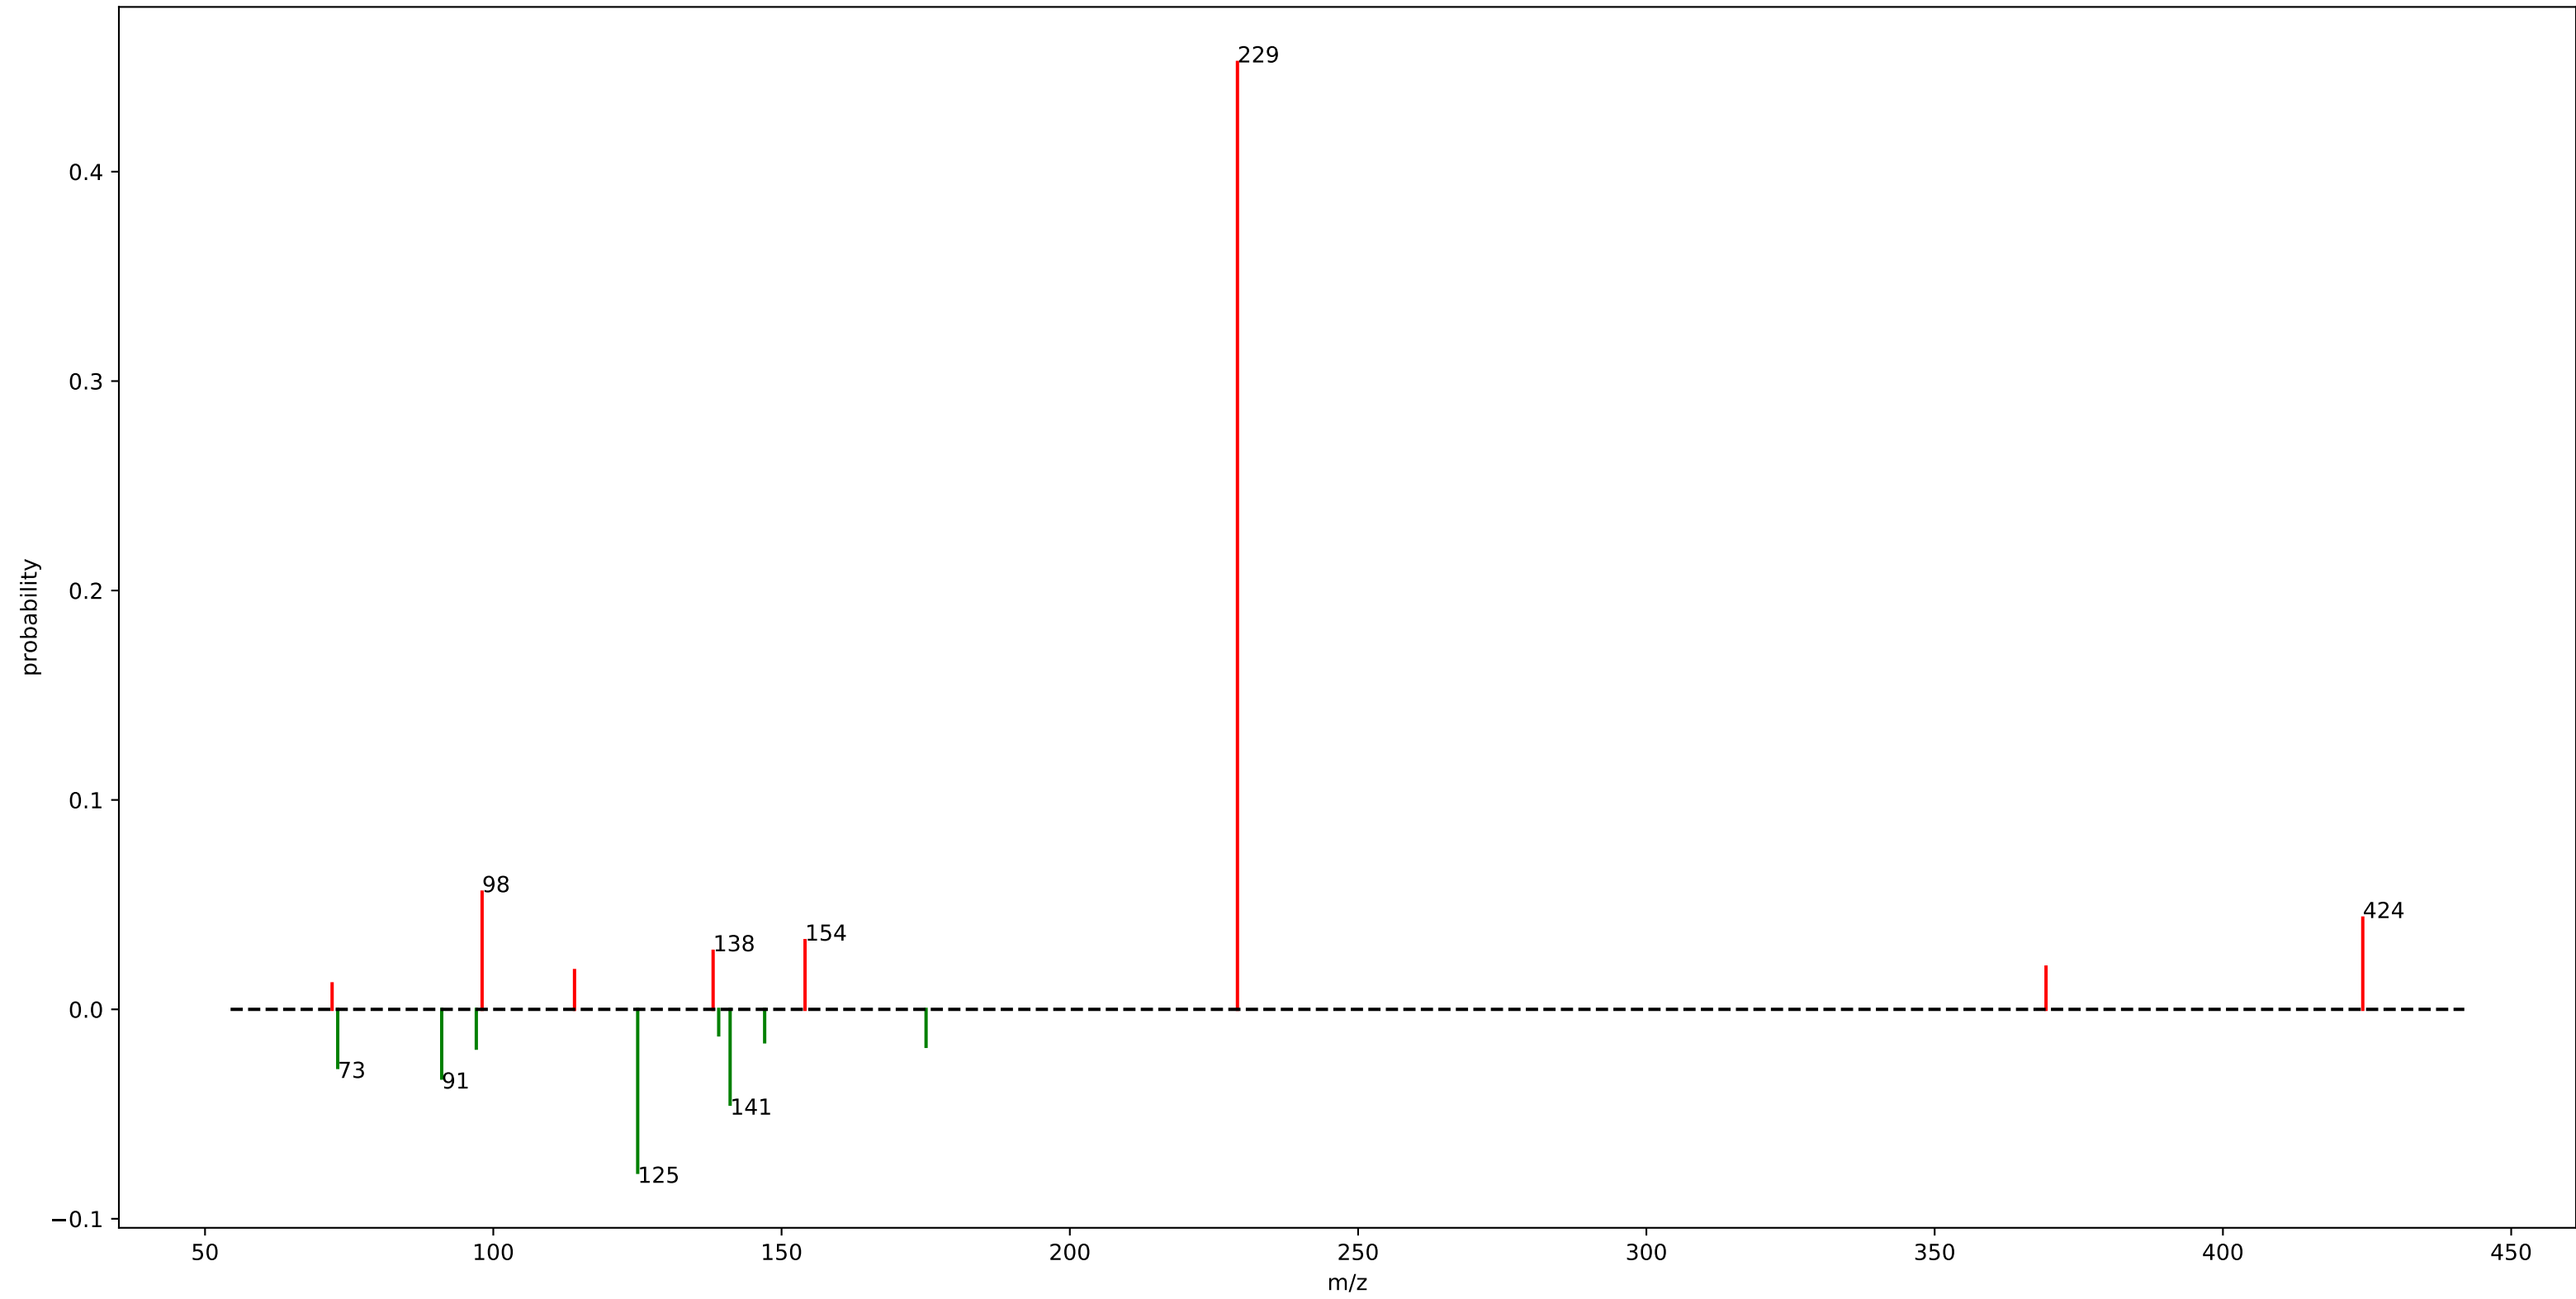

## motif\_563

|                   |        |
|-------------------|--------|
| fragment_229.0725 | : 0.45 |
| loss_125.0475     | : 0.08 |
| fragment_98.0575  | : 0.06 |
| loss_141.0775     | : 0.05 |
| fragment_424.2575 | : 0.04 |
| fragment_154.0725 | : 0.03 |
| loss_91.0525      | : 0.03 |
| fragment_138.1275 | : 0.03 |
| loss_73.0175      | : 0.03 |
| fragment_369.3175 | : 0.02 |
| fragment_114.0875 | : 0.02 |
| loss_97.0525      | : 0.02 |
| loss_175.0625     | : 0.02 |
| loss_147.0675     | : 0.02 |
| loss_139.0975     | : 0.01 |
| fragment_72.0425  | : 0.01 |

motif\_649

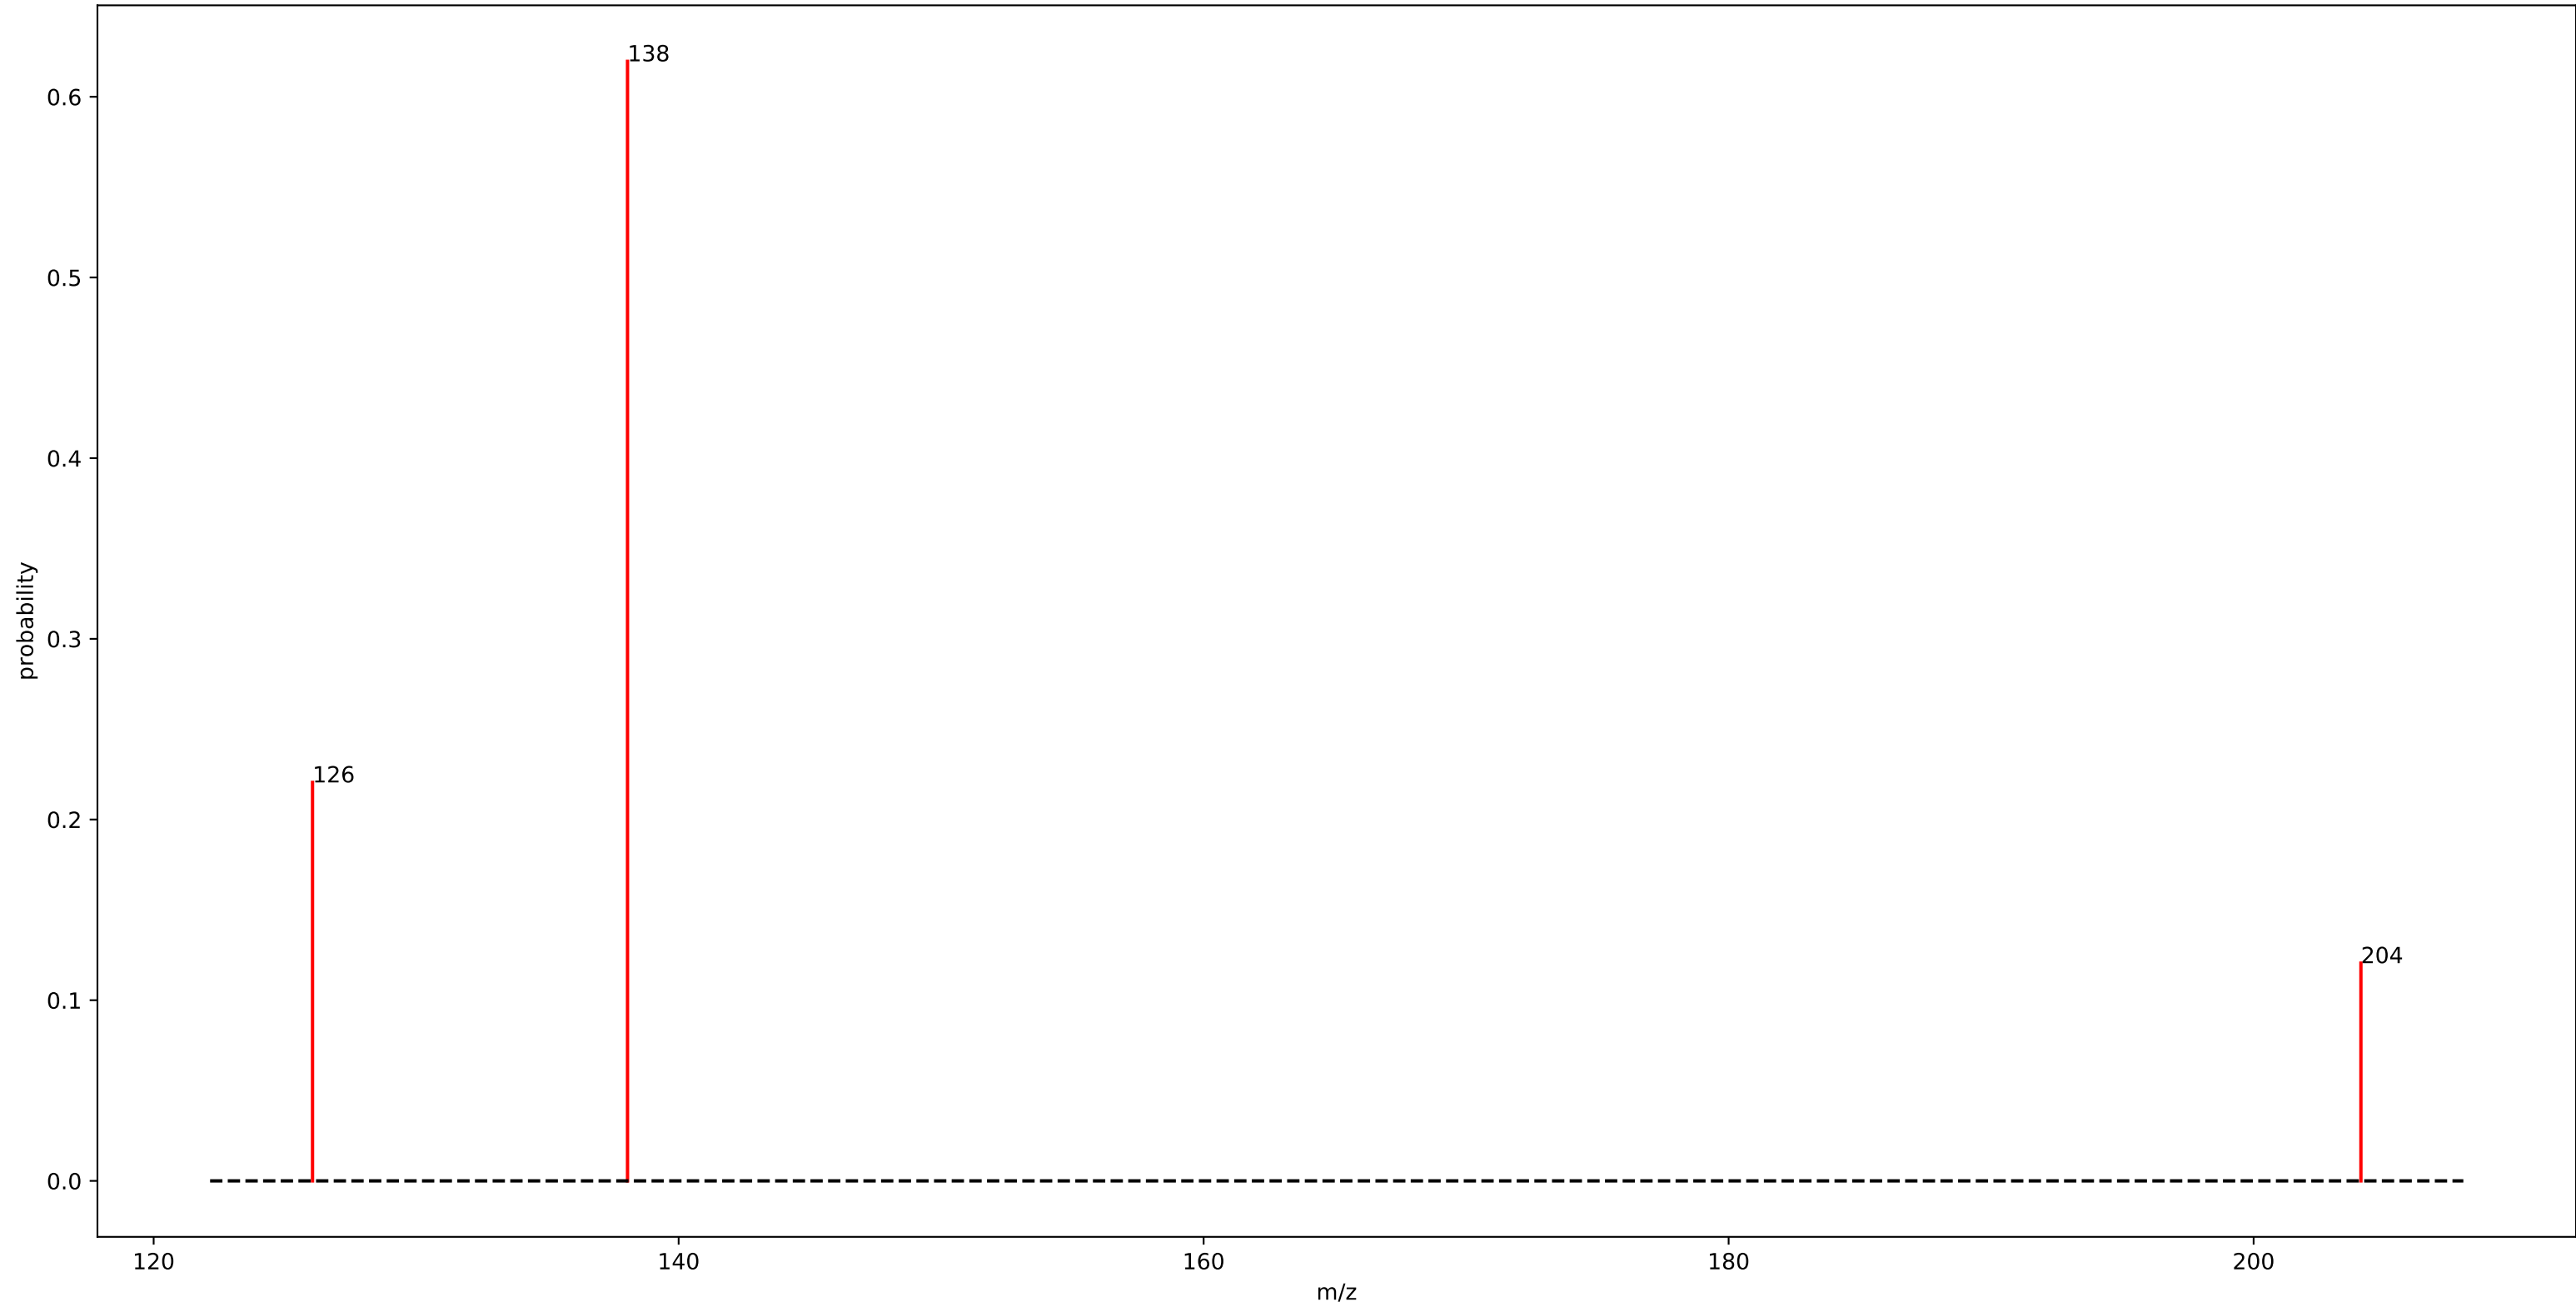

## motif\_649

|                   |        |
|-------------------|--------|
| fragment_138.0525 | : 0.62 |
| fragment_126.0525 | : 0.22 |
| fragment_204.0875 | : 0.12 |



rhabdus\_motif\_50.m2m

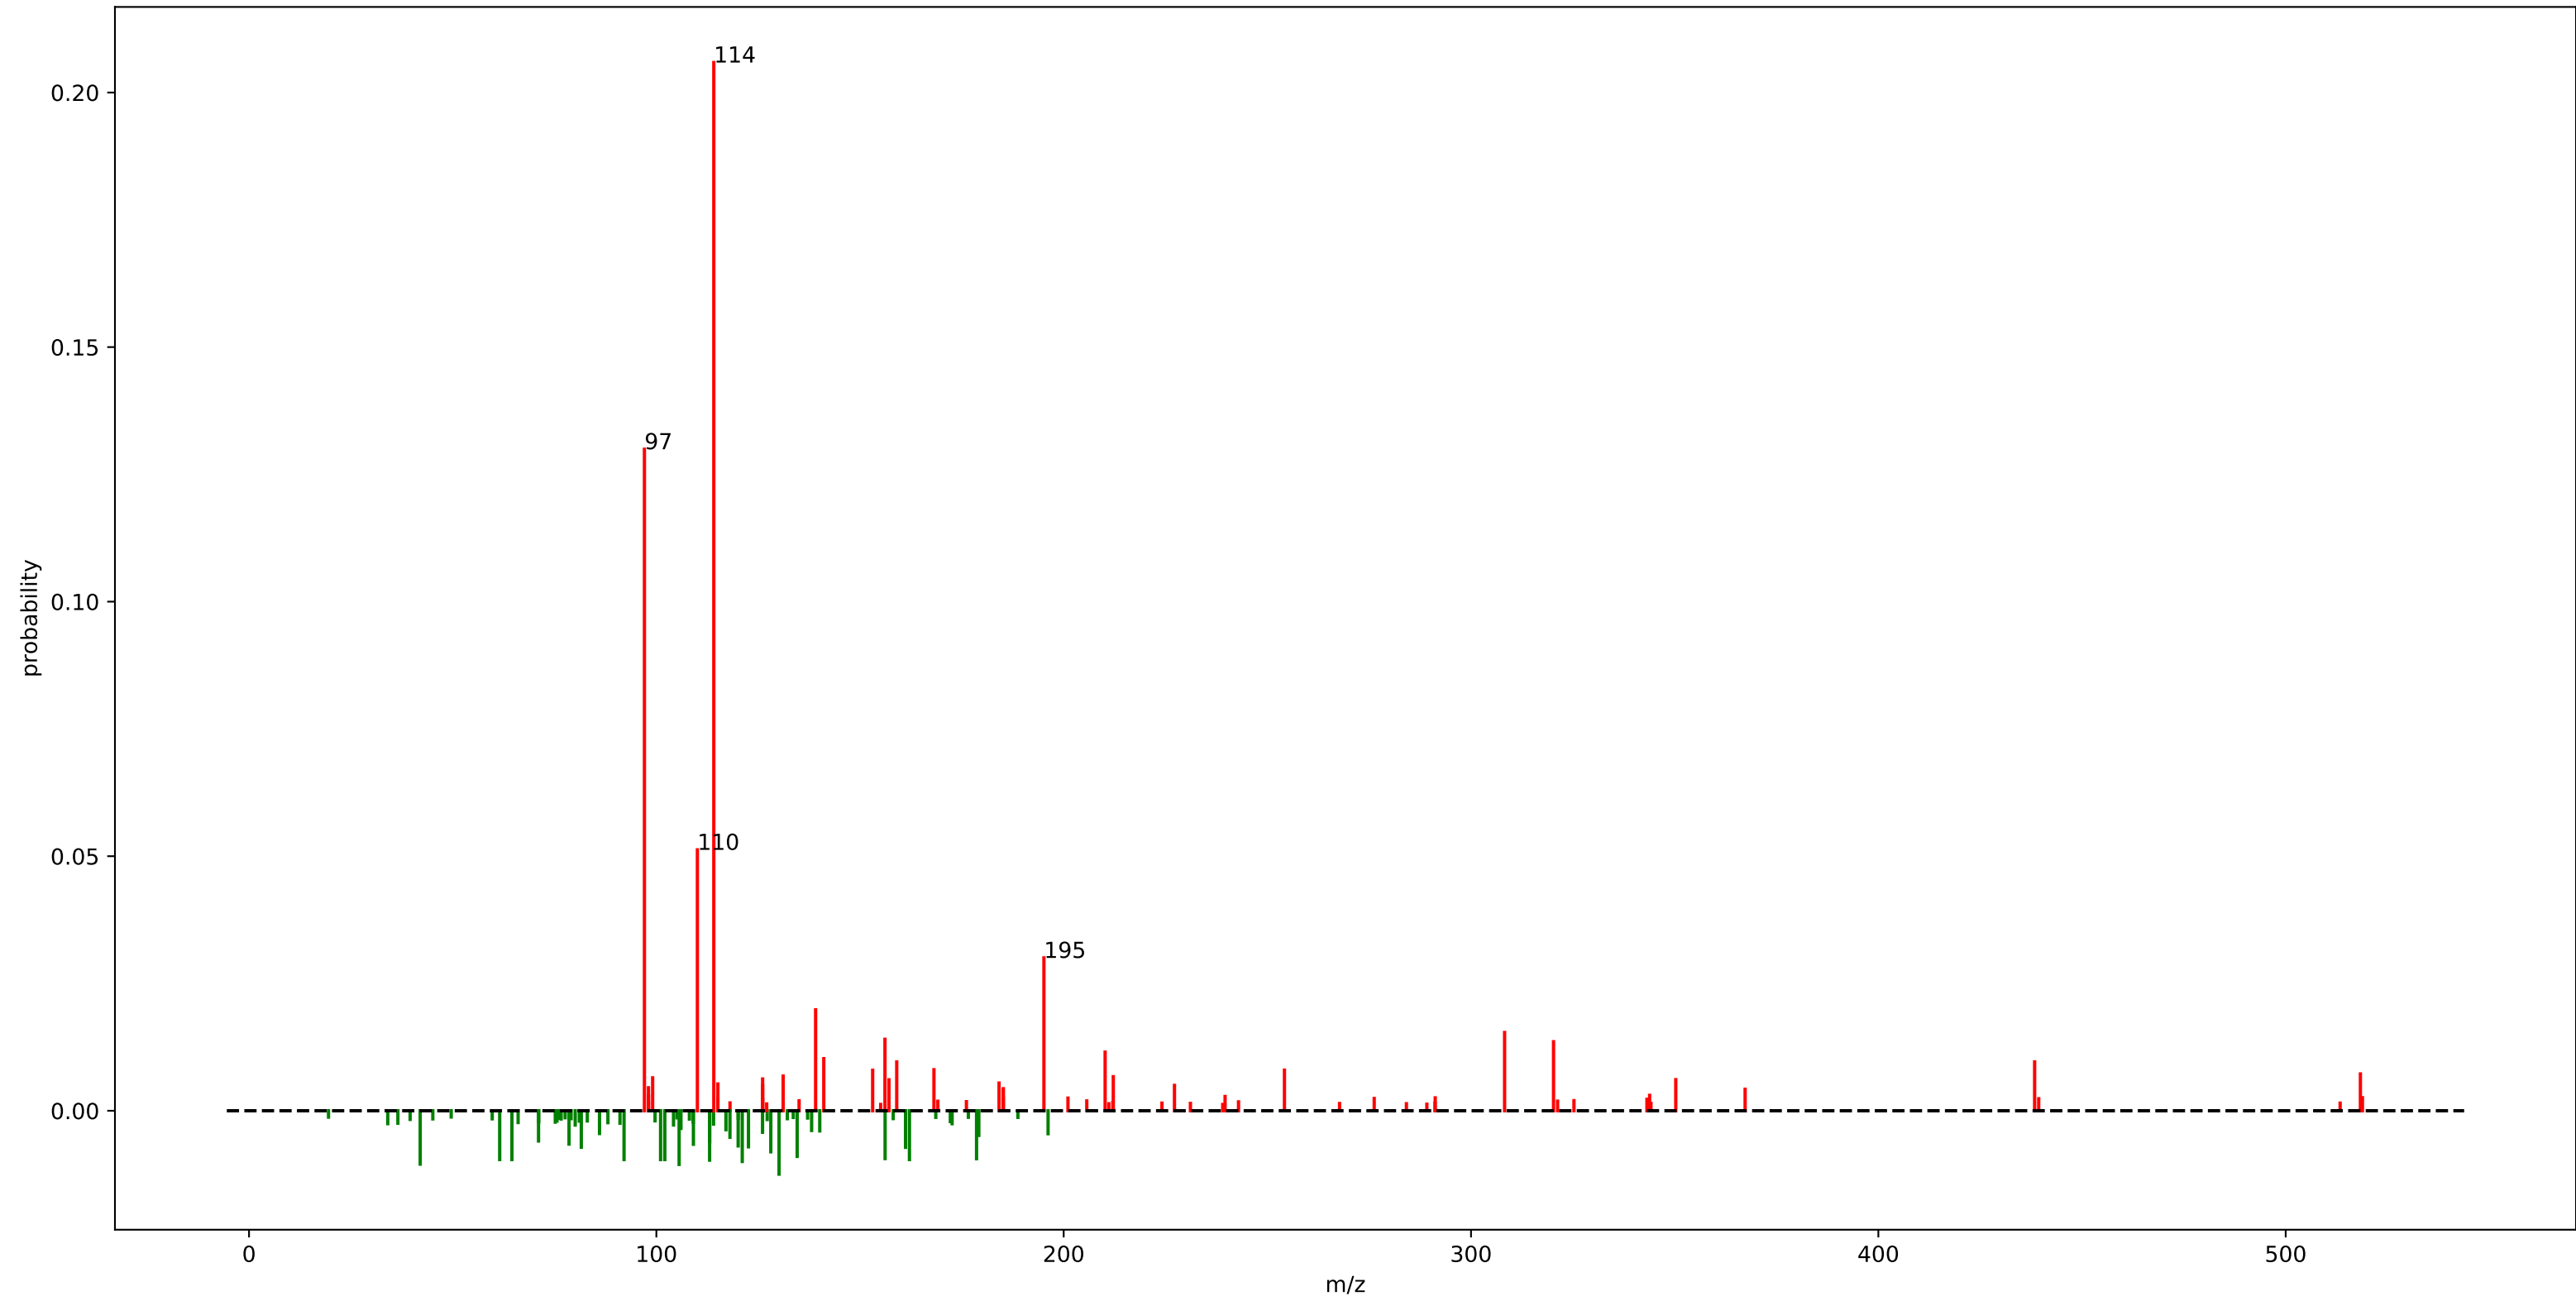

# rhabdus\_motif\_50.m2m

|                   |        |                   |        |                   |        |
|-------------------|--------|-------------------|--------|-------------------|--------|
| fragment_114.1025 | : 0.21 | loss_102.0725     | : 0.01 | fragment_126.0875 | : 0.01 |
| fragment_97.0725  | : 0.13 | loss_101.0375     | : 0.01 | fragment_350.2675 | : 0.01 |
| fragment_110.0725 | : 0.05 | fragment_159.0125 | : 0.01 | loss_113.0925     | : 0.01 |
| fragment_195.1475 | : 0.03 | loss_178.6075     | : 0.01 | fragment_157.0975 | : 0.01 |
| fragment_139.0975 | : 0.02 | loss_156.1575     | : 0.01 | loss_71.0725      | : 0.01 |
| fragment_308.2425 | : 0.02 | loss_134.5675     | : 0.01 | fragment_184.1325 | : 0.01 |
| fragment_156.1225 | : 0.01 | loss_128.0975     | : 0.01 | fragment_115.1025 | : 0.01 |
| fragment_320.2575 | : 0.01 | fragment_168.1475 | : 0.01 | loss_118.0675     | : 0.01 |
| loss_130.1225     | : 0.01 | fragment_254.1975 | : 0.01 |                   |        |
| fragment_210.1725 | : 0.01 | fragment_153.1025 | : 0.01 |                   |        |
| loss_105.5875     | : 0.01 | fragment_518.3425 | : 0.01 |                   |        |
| loss_42.0225      | : 0.01 | loss_161.1775     | : 0.01 |                   |        |
| fragment_141.1025 | : 0.01 | loss_81.5725      | : 0.01 |                   |        |
| loss_121.0875     | : 0.01 | loss_122.6125     | : 0.01 |                   |        |
| loss_113.0725     | : 0.01 | loss_120.0825     | : 0.01 |                   |        |
| loss_61.5375      | : 0.01 | fragment_131.1275 | : 0.01 |                   |        |
| loss_64.5425      | : 0.01 | fragment_212.1775 | : 0.01 |                   |        |
| loss_92.0675      | : 0.01 | loss_109.0975     | : 0.01 |                   |        |
| fragment_438.3675 | : 0.01 | loss_78.5625      | : 0.01 |                   |        |
| loss_162.1325     | : 0.01 | fragment_99.0875  | : 0.01 |                   |        |

euphorbia\_motif\_308.m2m

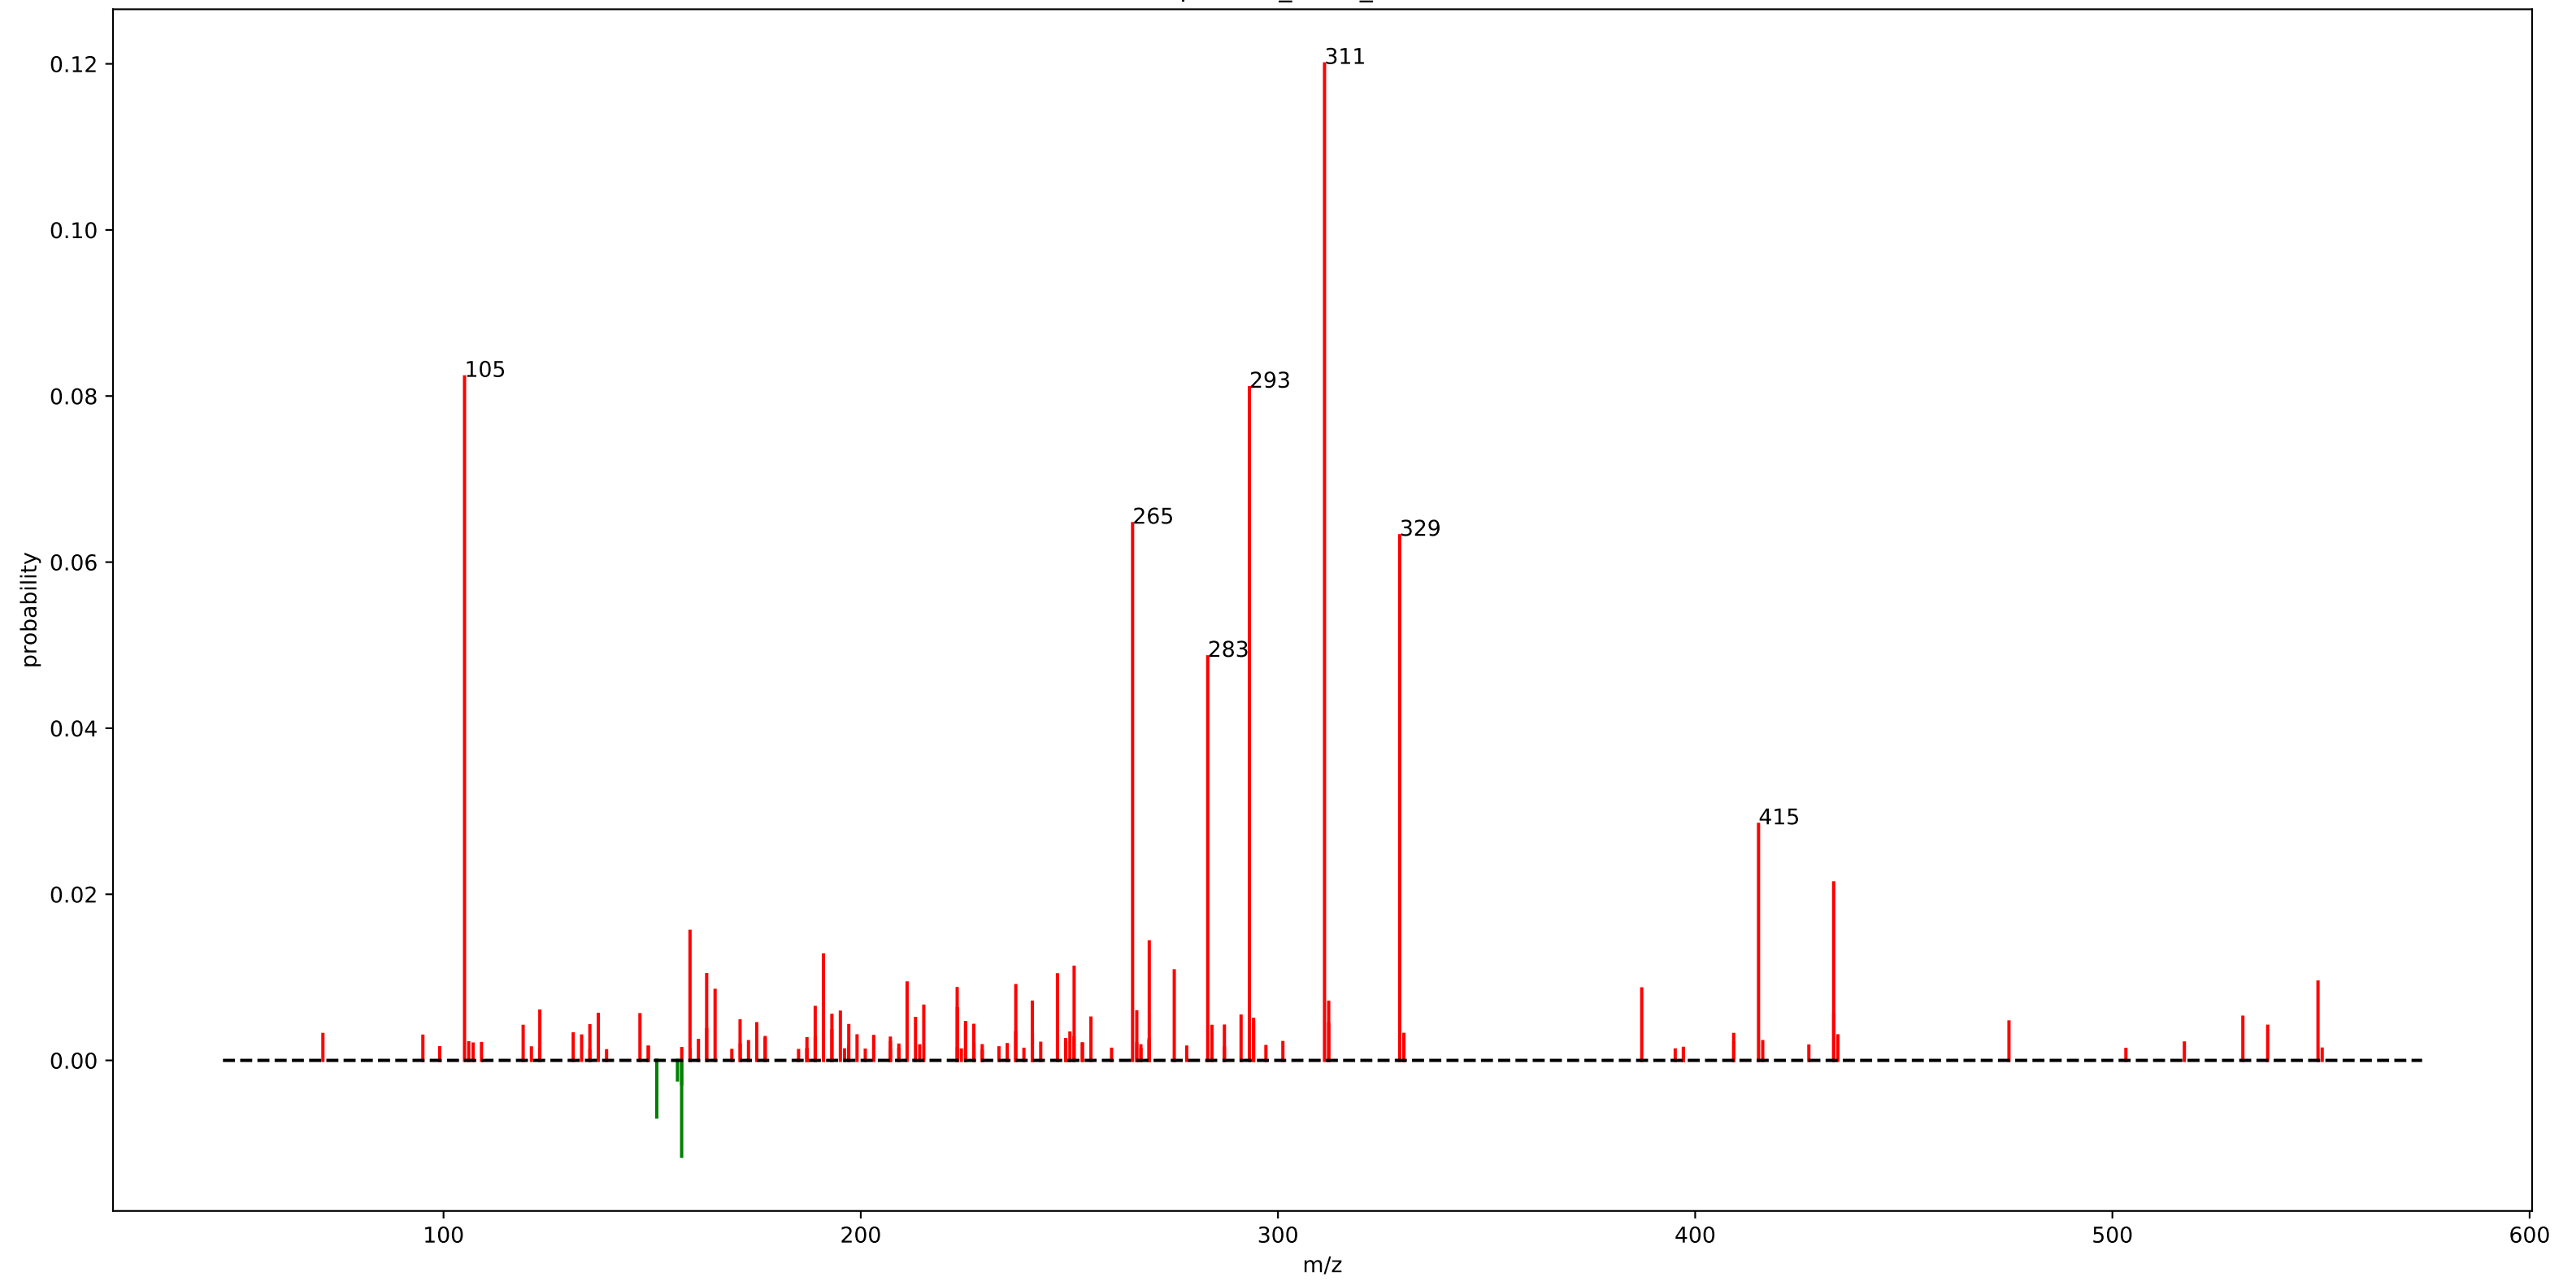

# euphorbia\_motif\_308.m2m

|                   |        |                   |        |
|-------------------|--------|-------------------|--------|
| fragment_311.1625 | : 0.12 | fragment_387.1925 | : 0.01 |
| fragment_105.0325 | : 0.08 | fragment_165.0875 | : 0.01 |
| fragment_293.1525 | : 0.08 | fragment_241.1225 | : 0.01 |
| fragment_265.1575 | : 0.06 | fragment_312.1625 | : 0.01 |
| fragment_329.1725 | : 0.06 | loss_151.1175     | : 0.01 |
| fragment_283.1675 | : 0.05 | fragment_215.1075 | : 0.01 |
| fragment_415.1875 | : 0.03 | fragment_189.0875 | : 0.01 |
| fragment_433.1975 | : 0.02 | fragment_223.1475 | : 0.01 |
| fragment_159.0775 | : 0.02 | fragment_123.0775 | : 0.01 |
| fragment_269.1525 | : 0.01 | fragment_266.1625 | : 0.01 |
| fragment_191.0675 | : 0.01 | fragment_195.1175 | : 0.01 |
| loss_157.0725     | : 0.01 | fragment_137.0975 | : 0.01 |
| fragment_251.1425 | : 0.01 | fragment_433.2025 | : 0.01 |
| fragment_275.1425 | : 0.01 | fragment_147.0775 | : 0.01 |
| fragment_163.0725 | : 0.01 | fragment_193.0825 | : 0.01 |
| fragment_247.1475 | : 0.01 | fragment_291.1575 | : 0.01 |
| fragment_549.2825 | : 0.01 | fragment_531.2725 | : 0.01 |
| fragment_211.1125 | : 0.01 | fragment_255.1725 | : 0.01 |
| fragment_237.1625 | : 0.01 | fragment_213.1275 | : 0.01 |
| fragment_223.1125 | : 0.01 |                   |        |

motif\_648

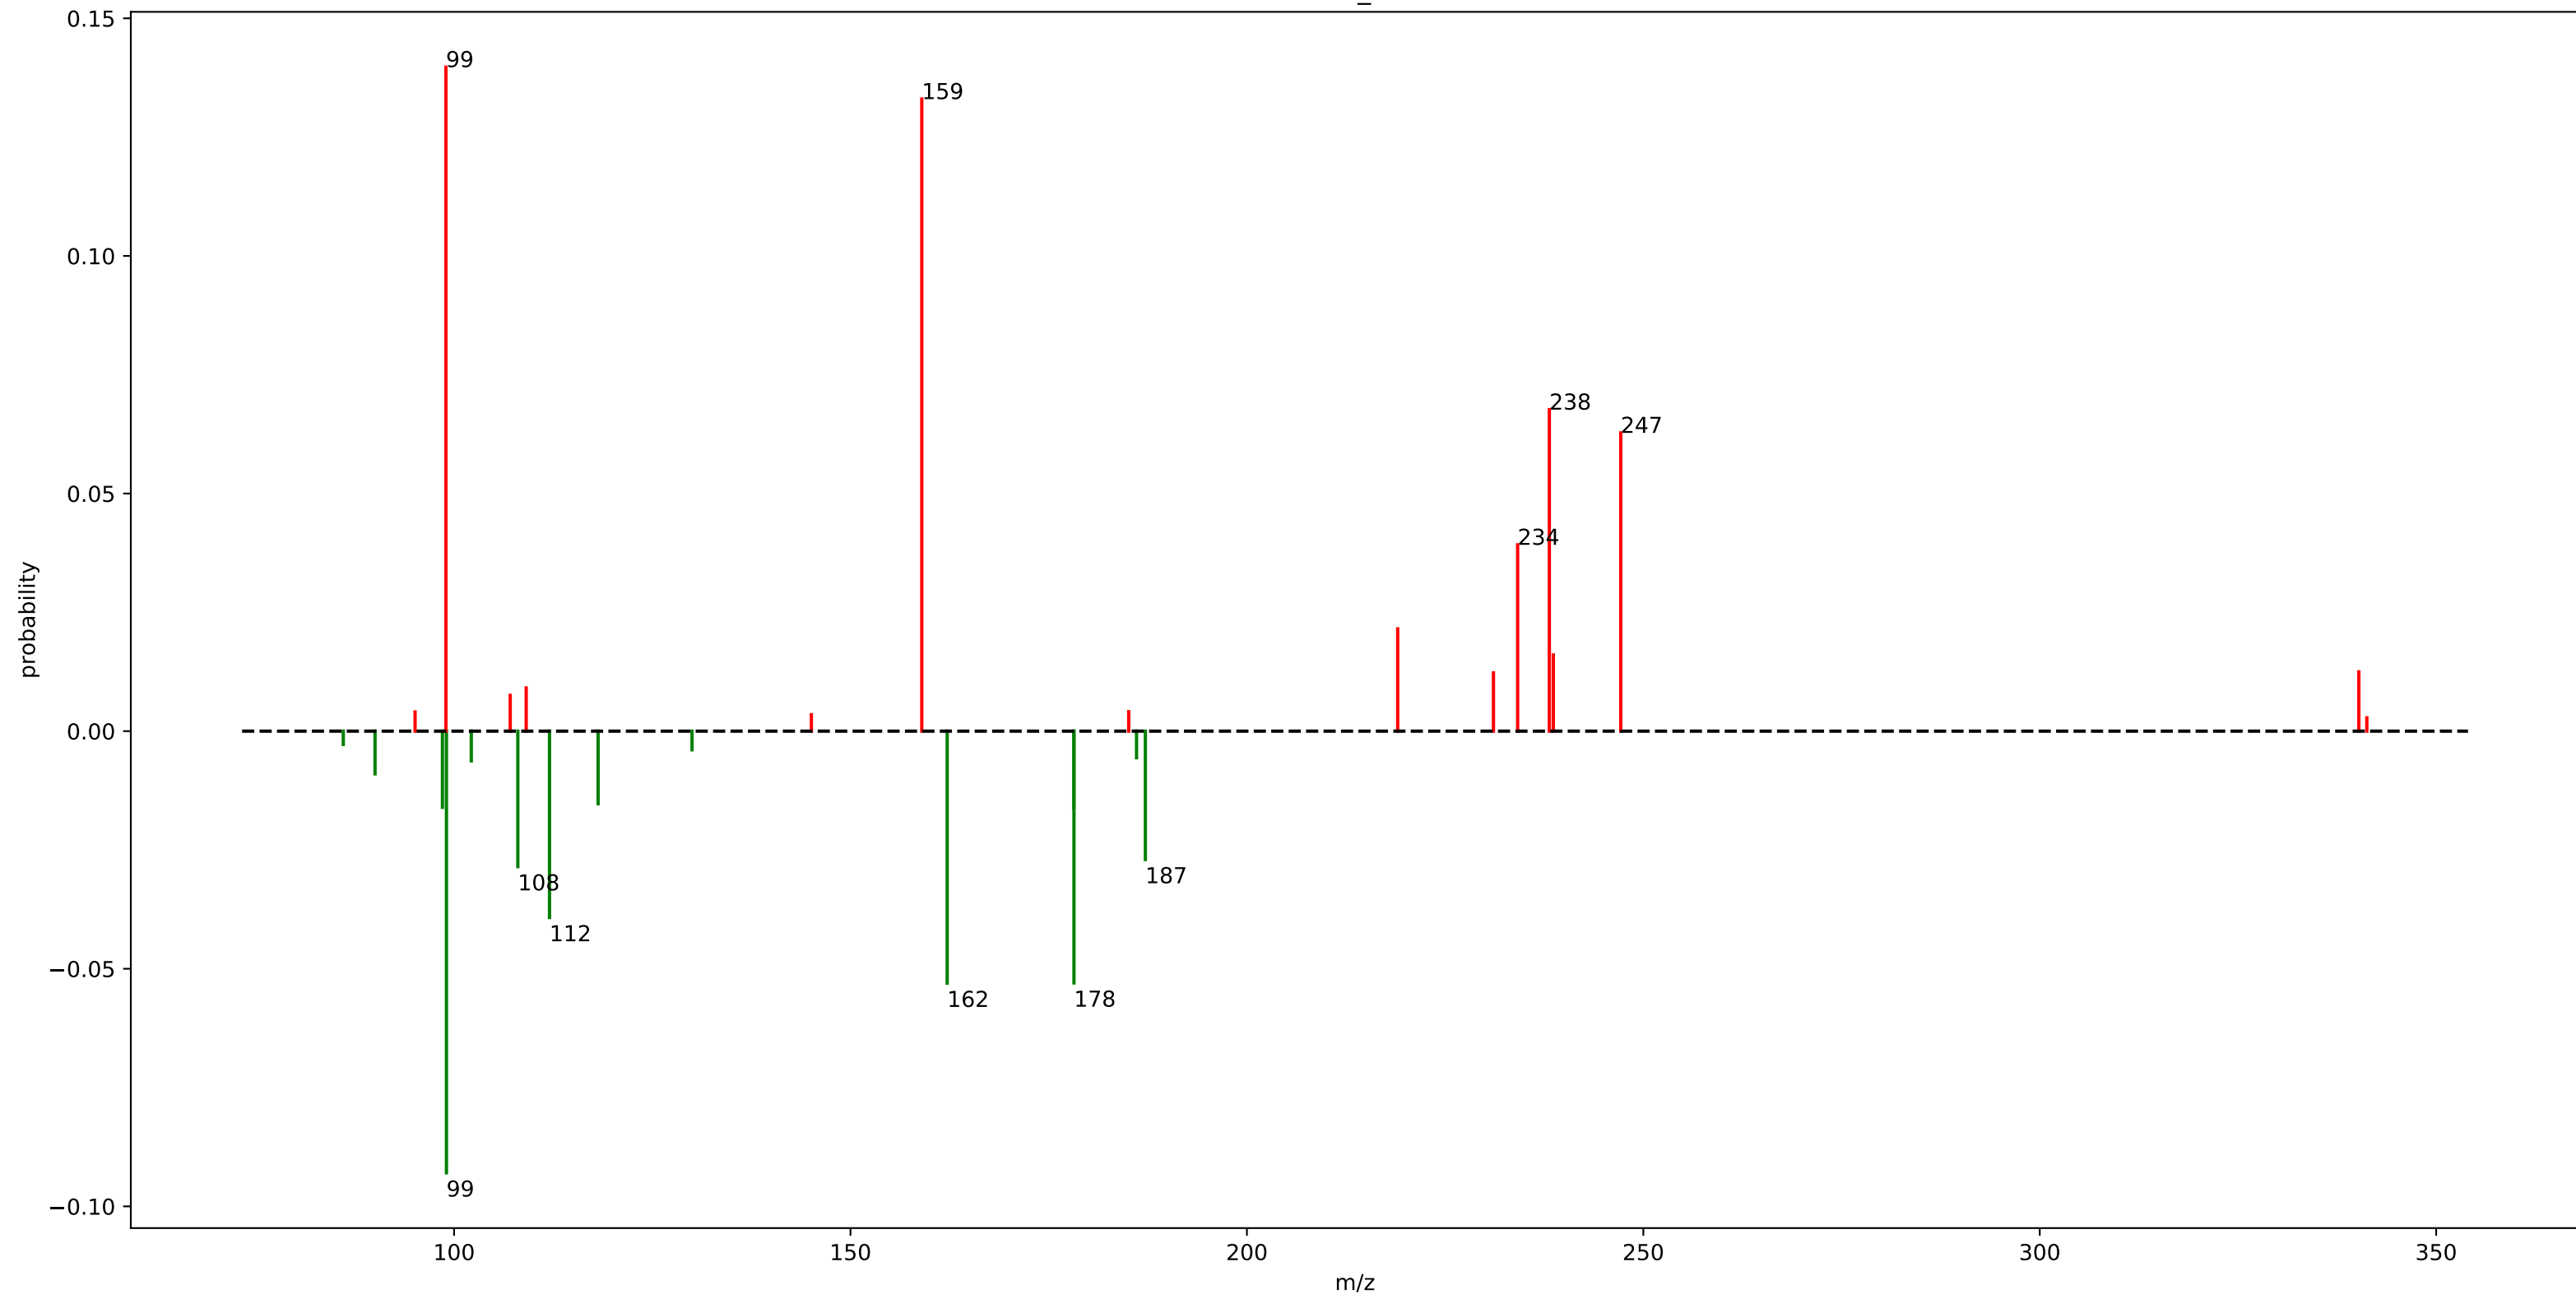

## motif\_648

|                   |        |                   |        |
|-------------------|--------|-------------------|--------|
| fragment_98.9725  | : 0.14 | fragment_107.0825 | : 0.01 |
| fragment_158.9925 | : 0.13 | loss_102.1725     | : 0.01 |
| loss_99.0375      | : 0.09 | loss_186.0775     | : 0.01 |
| fragment_238.1475 | : 0.07 |                   |        |
| fragment_247.1525 | : 0.06 |                   |        |
| loss_162.1975     | : 0.05 |                   |        |
| loss_178.1875     | : 0.05 |                   |        |
| fragment_234.1475 | : 0.04 |                   |        |
| loss_112.0375     | : 0.04 |                   |        |
| loss_108.0425     | : 0.03 |                   |        |
| loss_187.1925     | : 0.03 |                   |        |
| fragment_219.0175 | : 0.02 |                   |        |
| loss_178.1725     | : 0.02 |                   |        |
| loss_98.5325      | : 0.02 |                   |        |
| fragment_238.6475 | : 0.02 |                   |        |
| loss_118.1675     | : 0.02 |                   |        |
| fragment_340.2475 | : 0.01 |                   |        |
| fragment_231.0975 | : 0.01 |                   |        |
| fragment_109.0975 | : 0.01 |                   |        |
| loss_90.0325      | : 0.01 |                   |        |

motif\_559

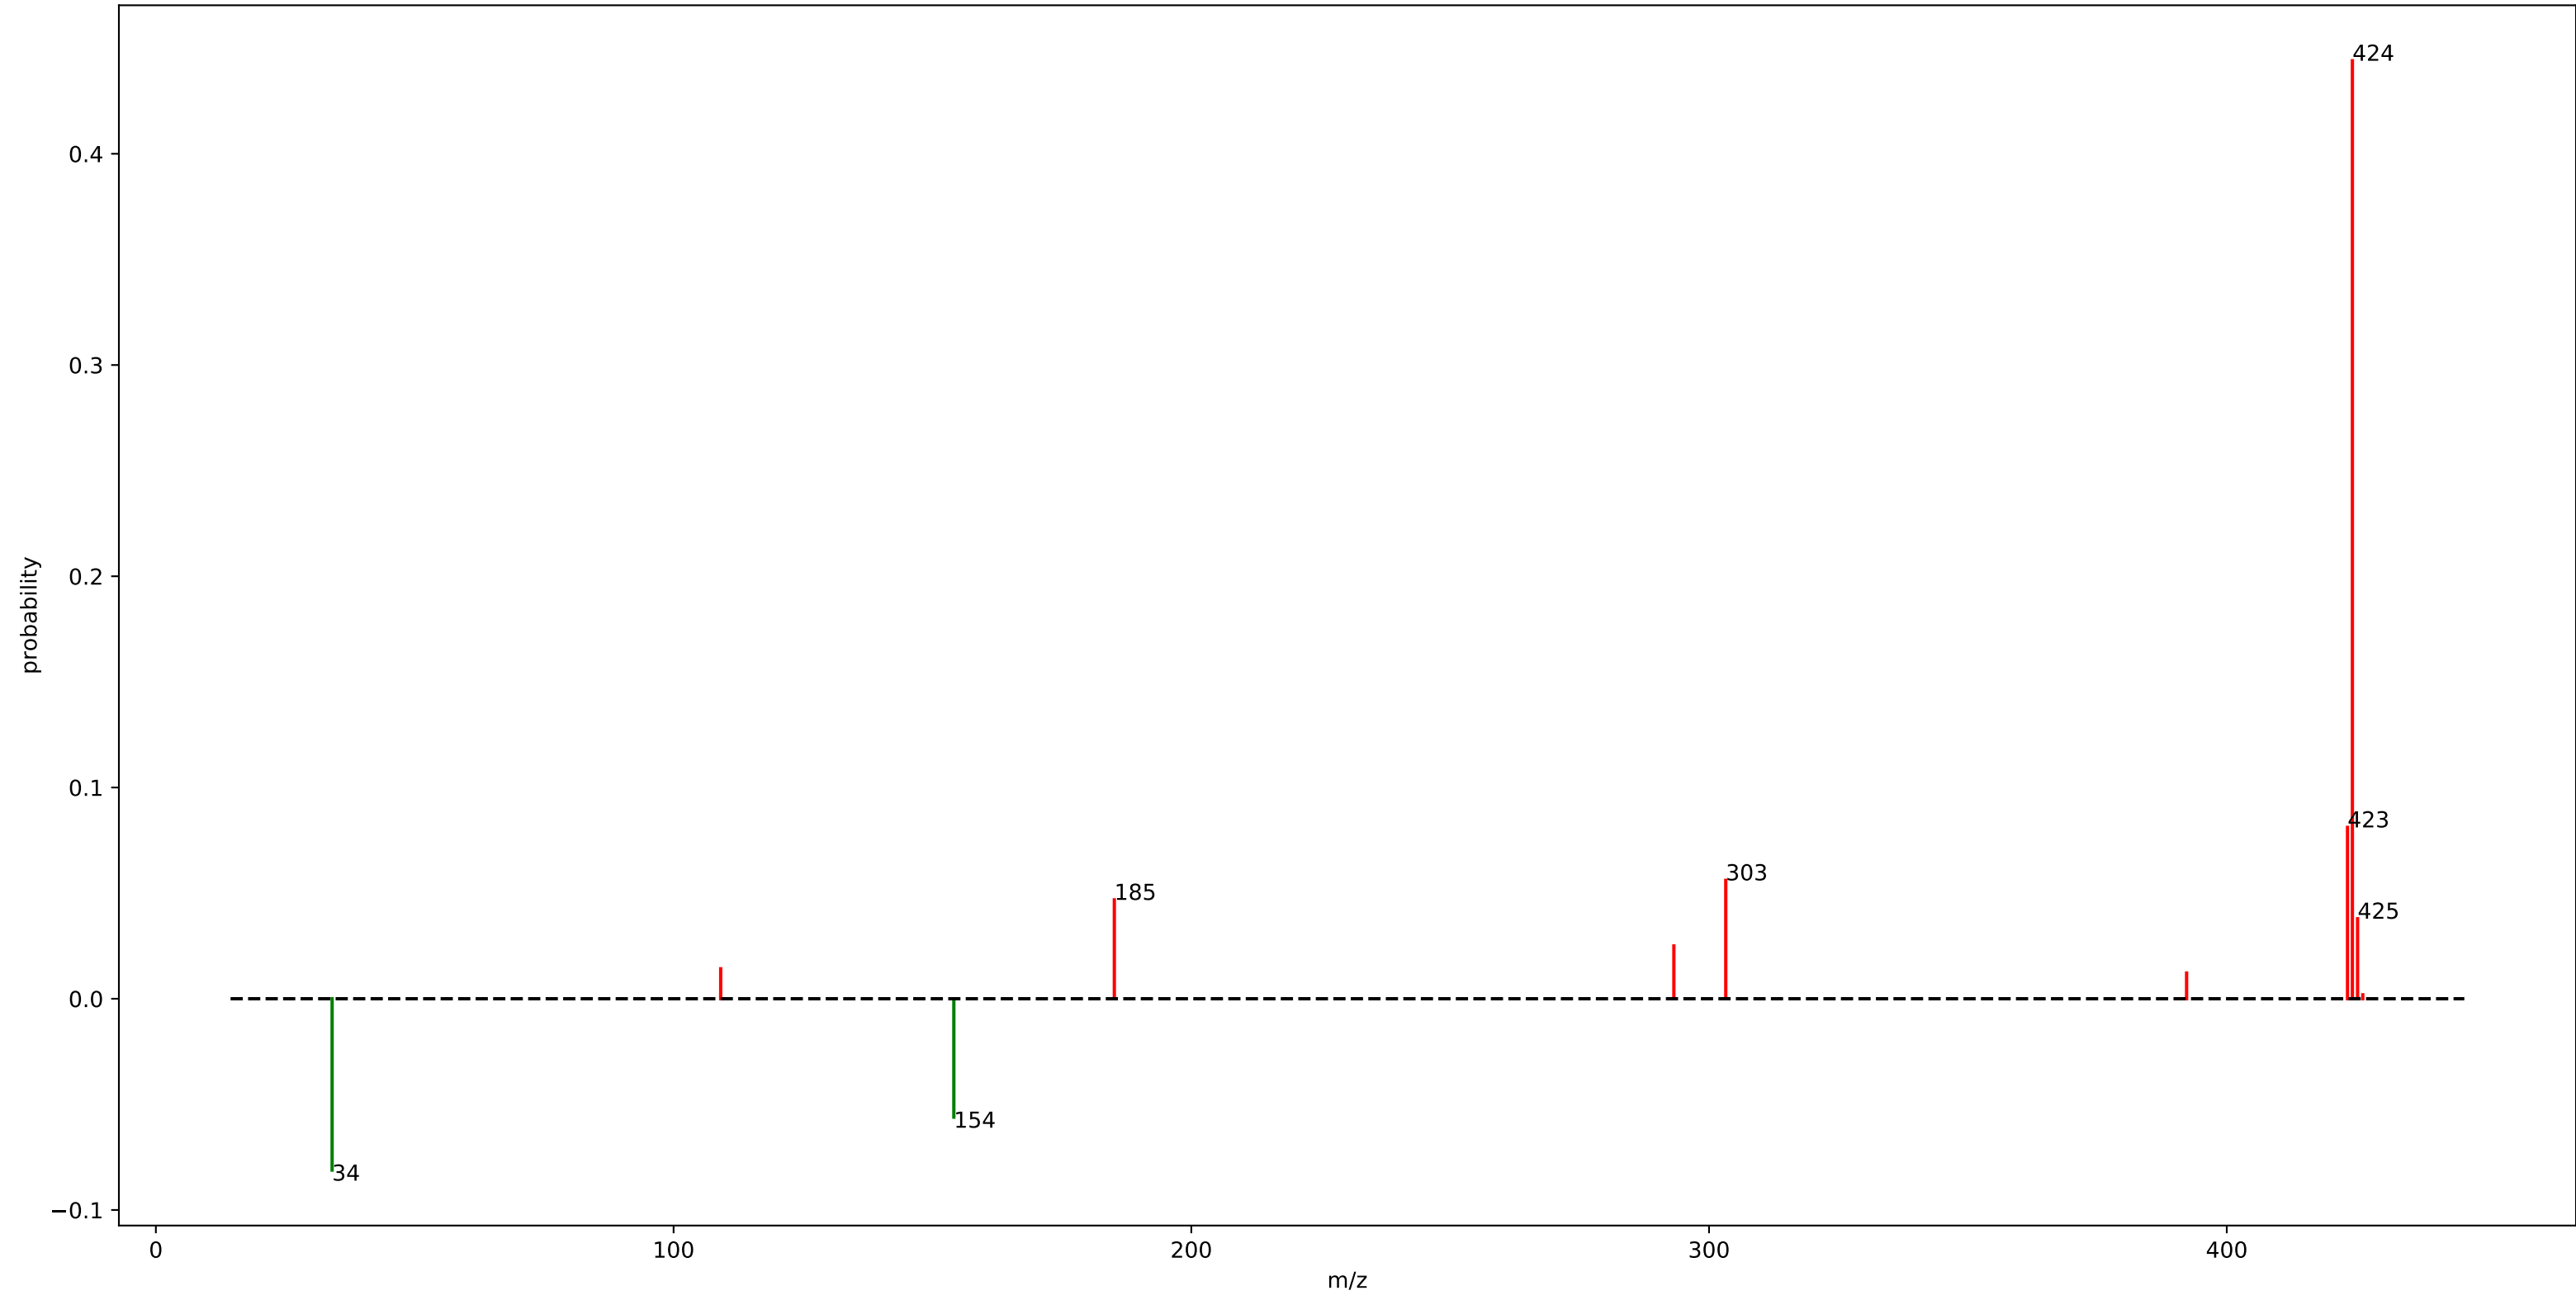

## motif\_559

|                   |        |
|-------------------|--------|
| fragment_424.2675 | : 0.44 |
| loss_34.0425      | : 0.08 |
| fragment_423.3225 | : 0.08 |
| fragment_303.2325 | : 0.06 |
| loss_154.1325     | : 0.06 |
| fragment_185.1325 | : 0.05 |
| fragment_425.2675 | : 0.04 |
| fragment_293.2075 | : 0.02 |
| fragment_109.0975 | : 0.01 |
| fragment_392.2425 | : 0.01 |



euphorbia\_motif\_135.m2m

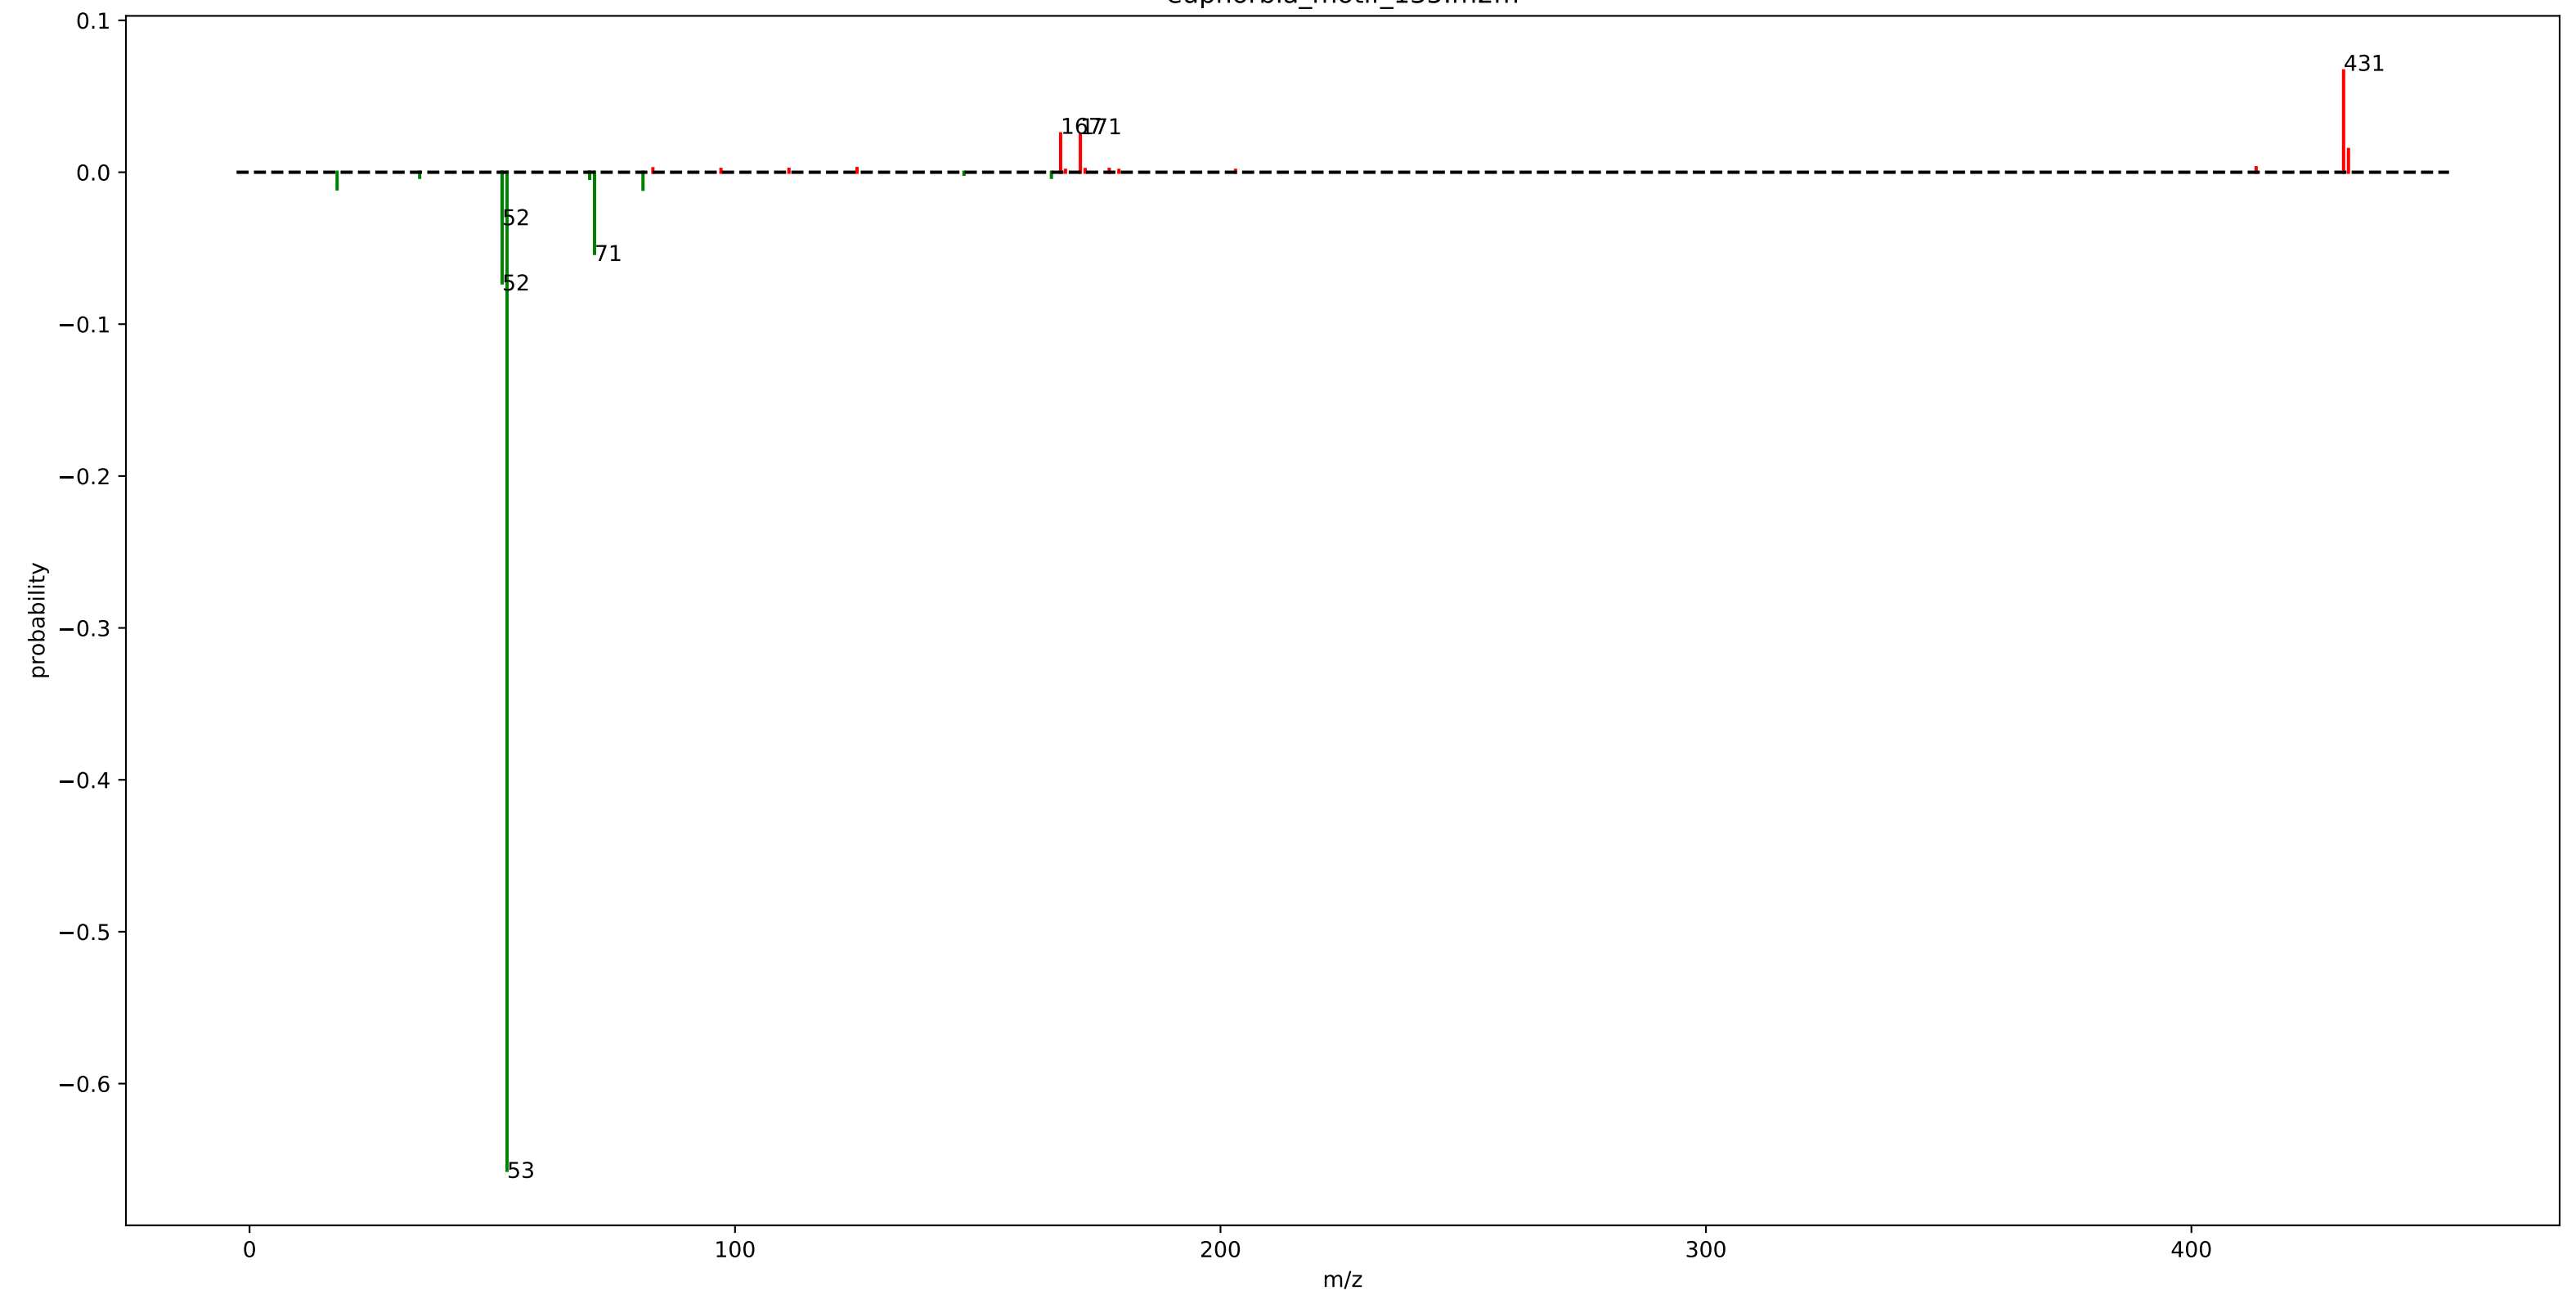

## euphorbia\_motif\_135.m2m

|                   |        |
|-------------------|--------|
| loss_53.0475      | : 0.66 |
| loss_52.0425      | : 0.07 |
| fragment_431.3475 | : 0.07 |
| loss_71.0575      | : 0.05 |
| loss_52.0475      | : 0.03 |
| fragment_167.0675 | : 0.03 |
| fragment_171.1375 | : 0.03 |
| fragment_432.3475 | : 0.02 |
| loss_81.0425      | : 0.01 |
| loss_18.0375      | : 0.01 |

urine\_mass2motif\_122.m2m

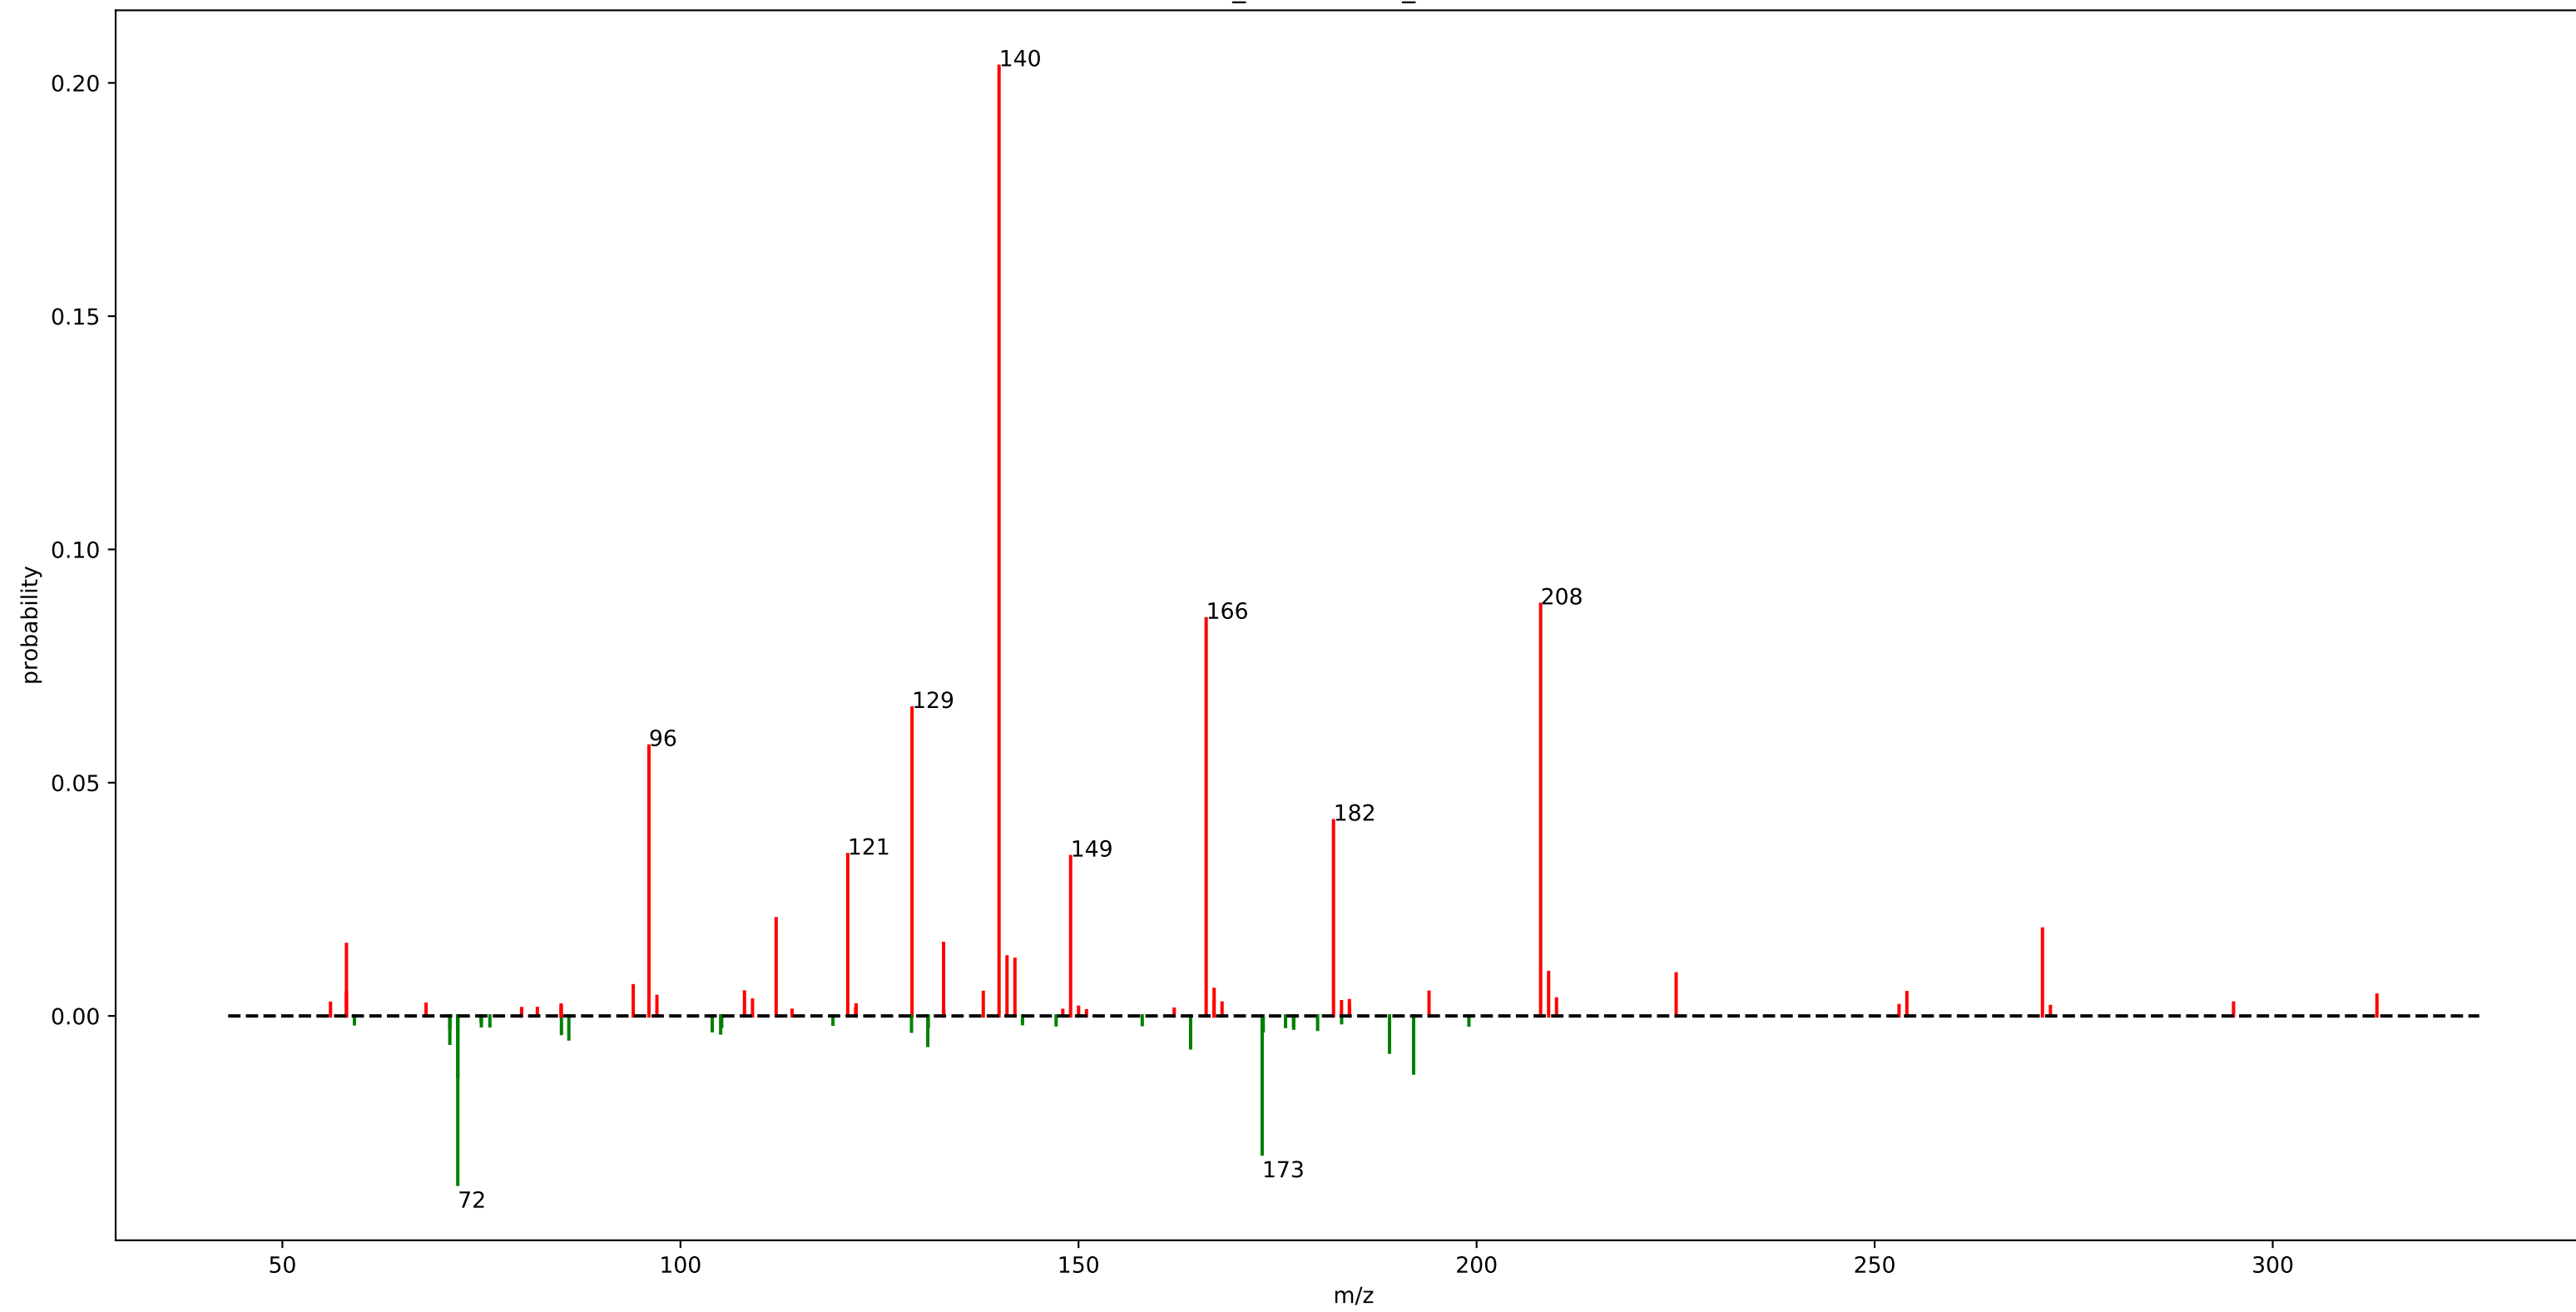

# urine\_mass2motif\_122.m2m

|                   |        |                   |        |
|-------------------|--------|-------------------|--------|
| fragment_140.0175 | : 0.20 | loss_189.0625     | : 0.01 |
| fragment_208.0425 | : 0.09 | loss_164.0825     | : 0.01 |
| fragment_166.0325 | : 0.09 | fragment_94.0675  | : 0.01 |
| fragment_129.0875 | : 0.07 | loss_131.0675     | : 0.01 |
| fragment_96.0425  | : 0.06 | loss_71.0325      | : 0.01 |
| fragment_182.0275 | : 0.04 | fragment_167.0325 | : 0.01 |
| loss_72.0325      | : 0.04 | fragment_108.0425 | : 0.01 |
| fragment_121.0125 | : 0.03 | fragment_194.0275 | : 0.01 |
| fragment_149.0075 | : 0.03 | fragment_138.0375 | : 0.01 |
| loss_173.0675     | : 0.03 | fragment_254.0475 | : 0.01 |
| fragment_112.0225 | : 0.02 |                   |        |
| fragment_271.0775 | : 0.02 |                   |        |
| fragment_133.0525 | : 0.02 |                   |        |
| fragment_58.0475  | : 0.02 |                   |        |
| loss_72.0425      | : 0.01 |                   |        |
| fragment_141.0175 | : 0.01 |                   |        |
| loss_192.0925     | : 0.01 |                   |        |
| fragment_142.0125 | : 0.01 |                   |        |
| fragment_209.0475 | : 0.01 |                   |        |
| fragment_225.0675 | : 0.01 |                   |        |

StrepSalini\_motif\_161.m2m

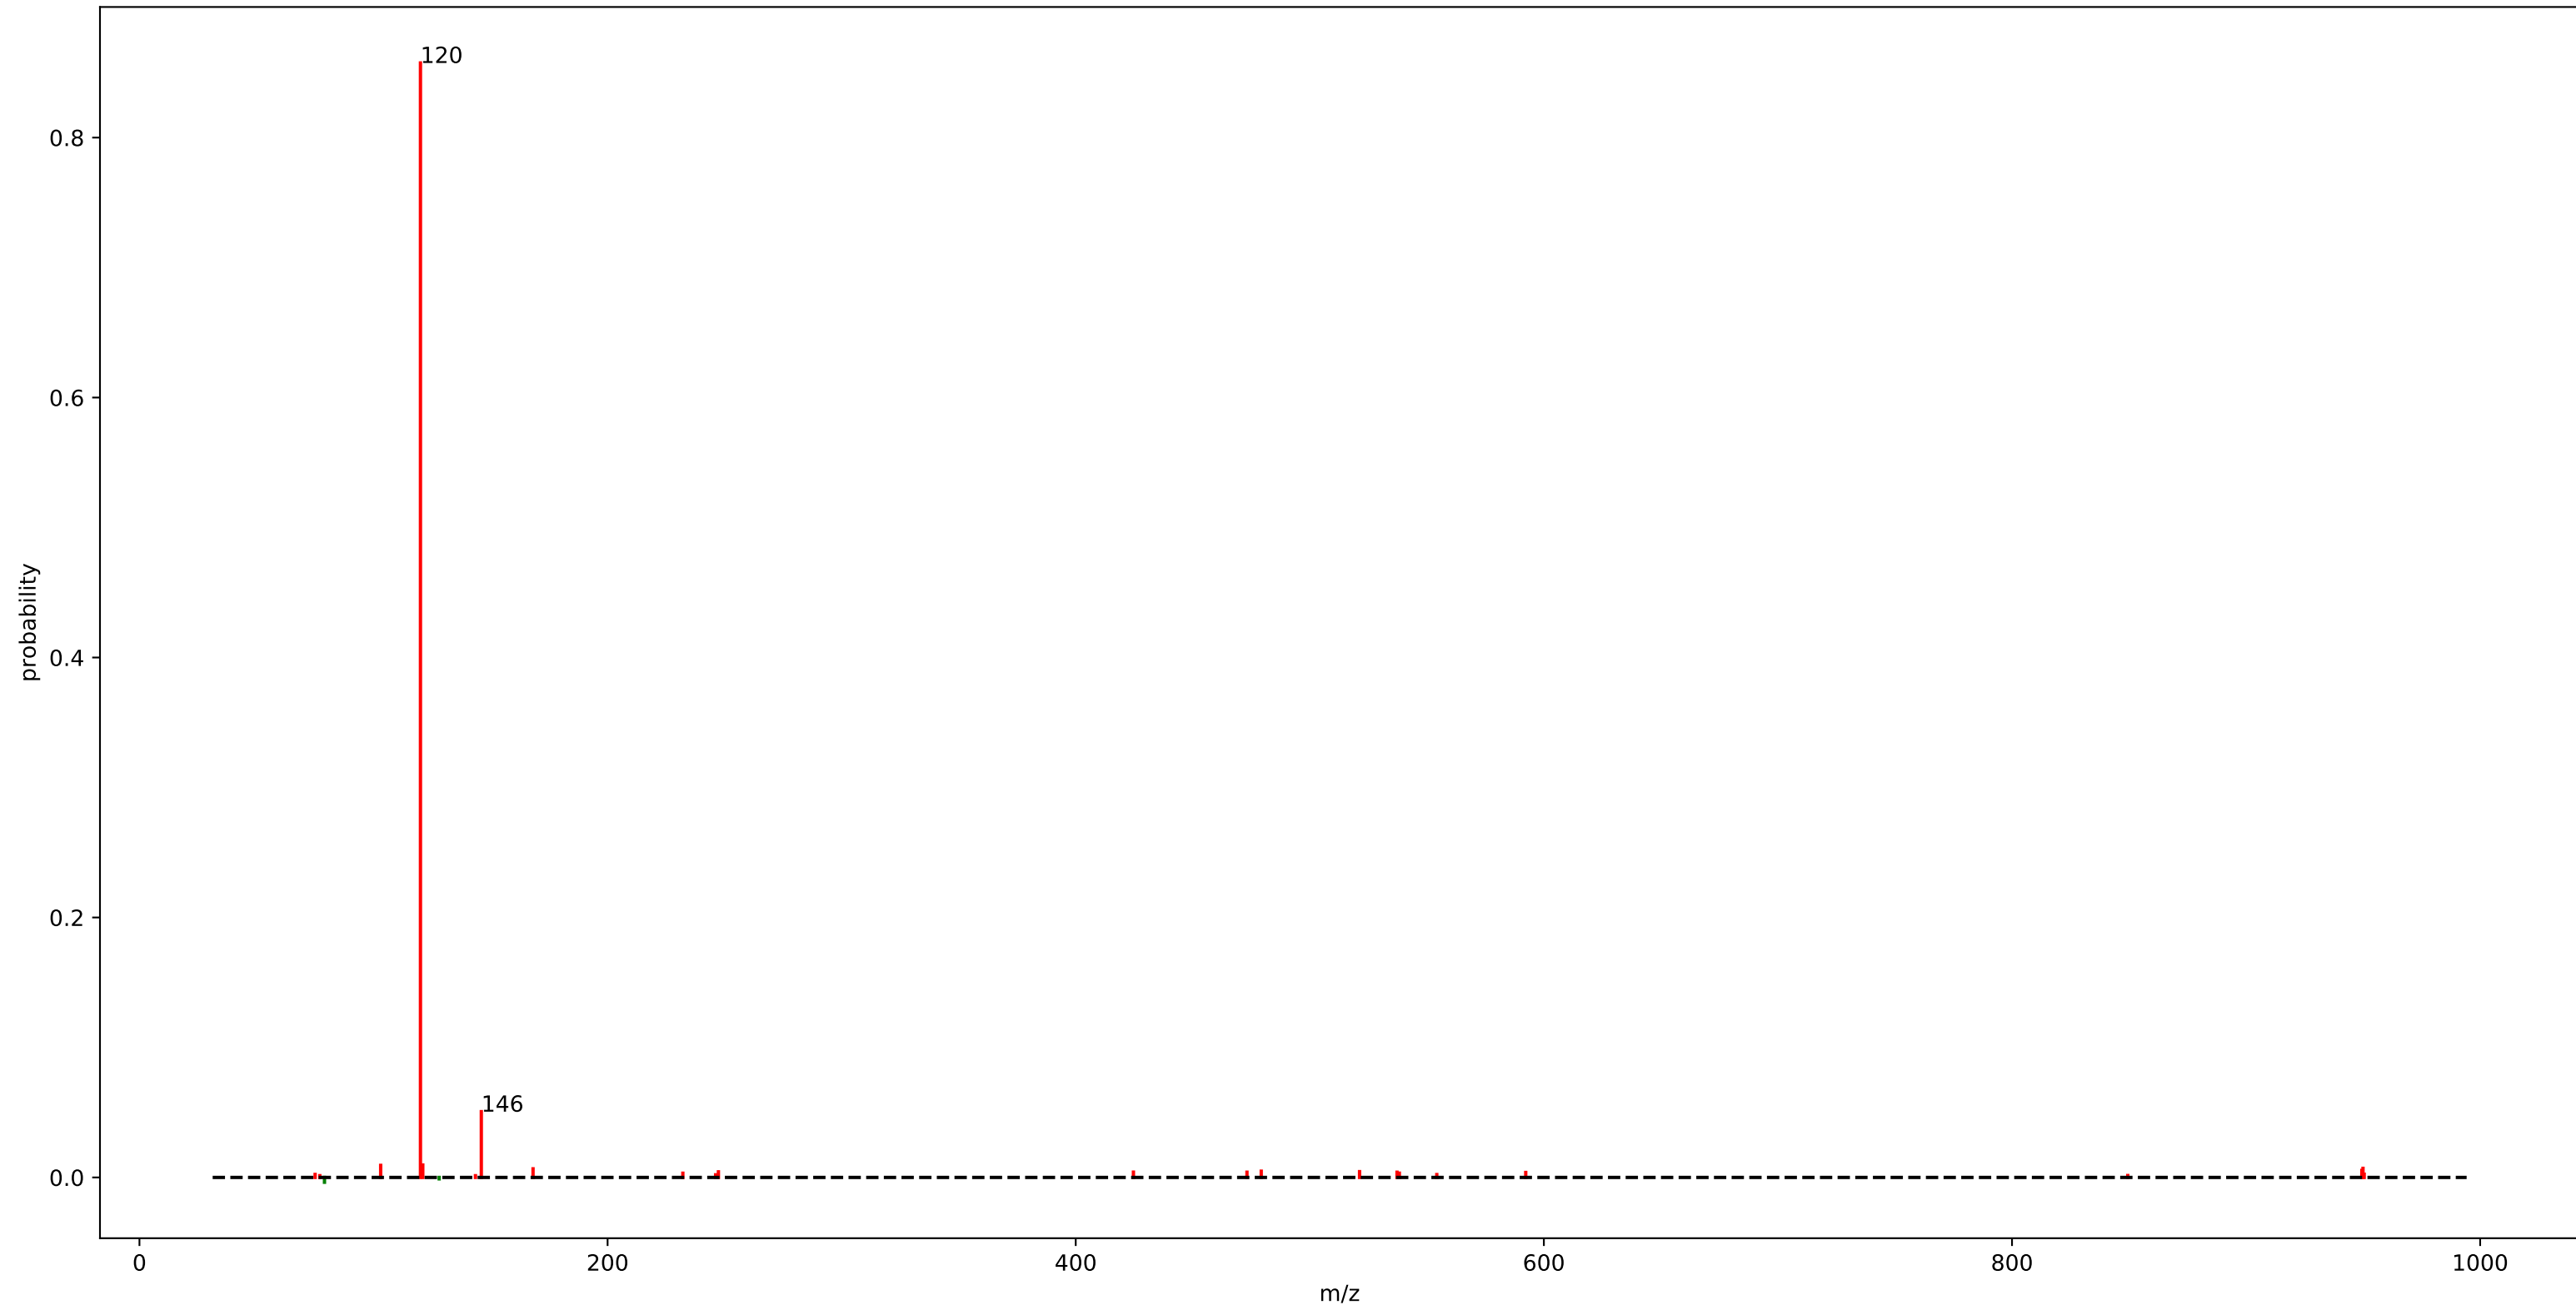

## StrepSalini\_motif\_161.m2m

|                   |        |
|-------------------|--------|
| fragment_120.0500 | : 0.86 |
| fragment_146.0500 | : 0.05 |
| fragment_121.0525 | : 0.01 |
| fragment_103.0525 | : 0.01 |
| fragment_949.9500 | : 0.01 |
| fragment_168.1500 | : 0.01 |
| fragment_949.4500 | : 0.01 |

urine\_mass2motif\_192.m2m

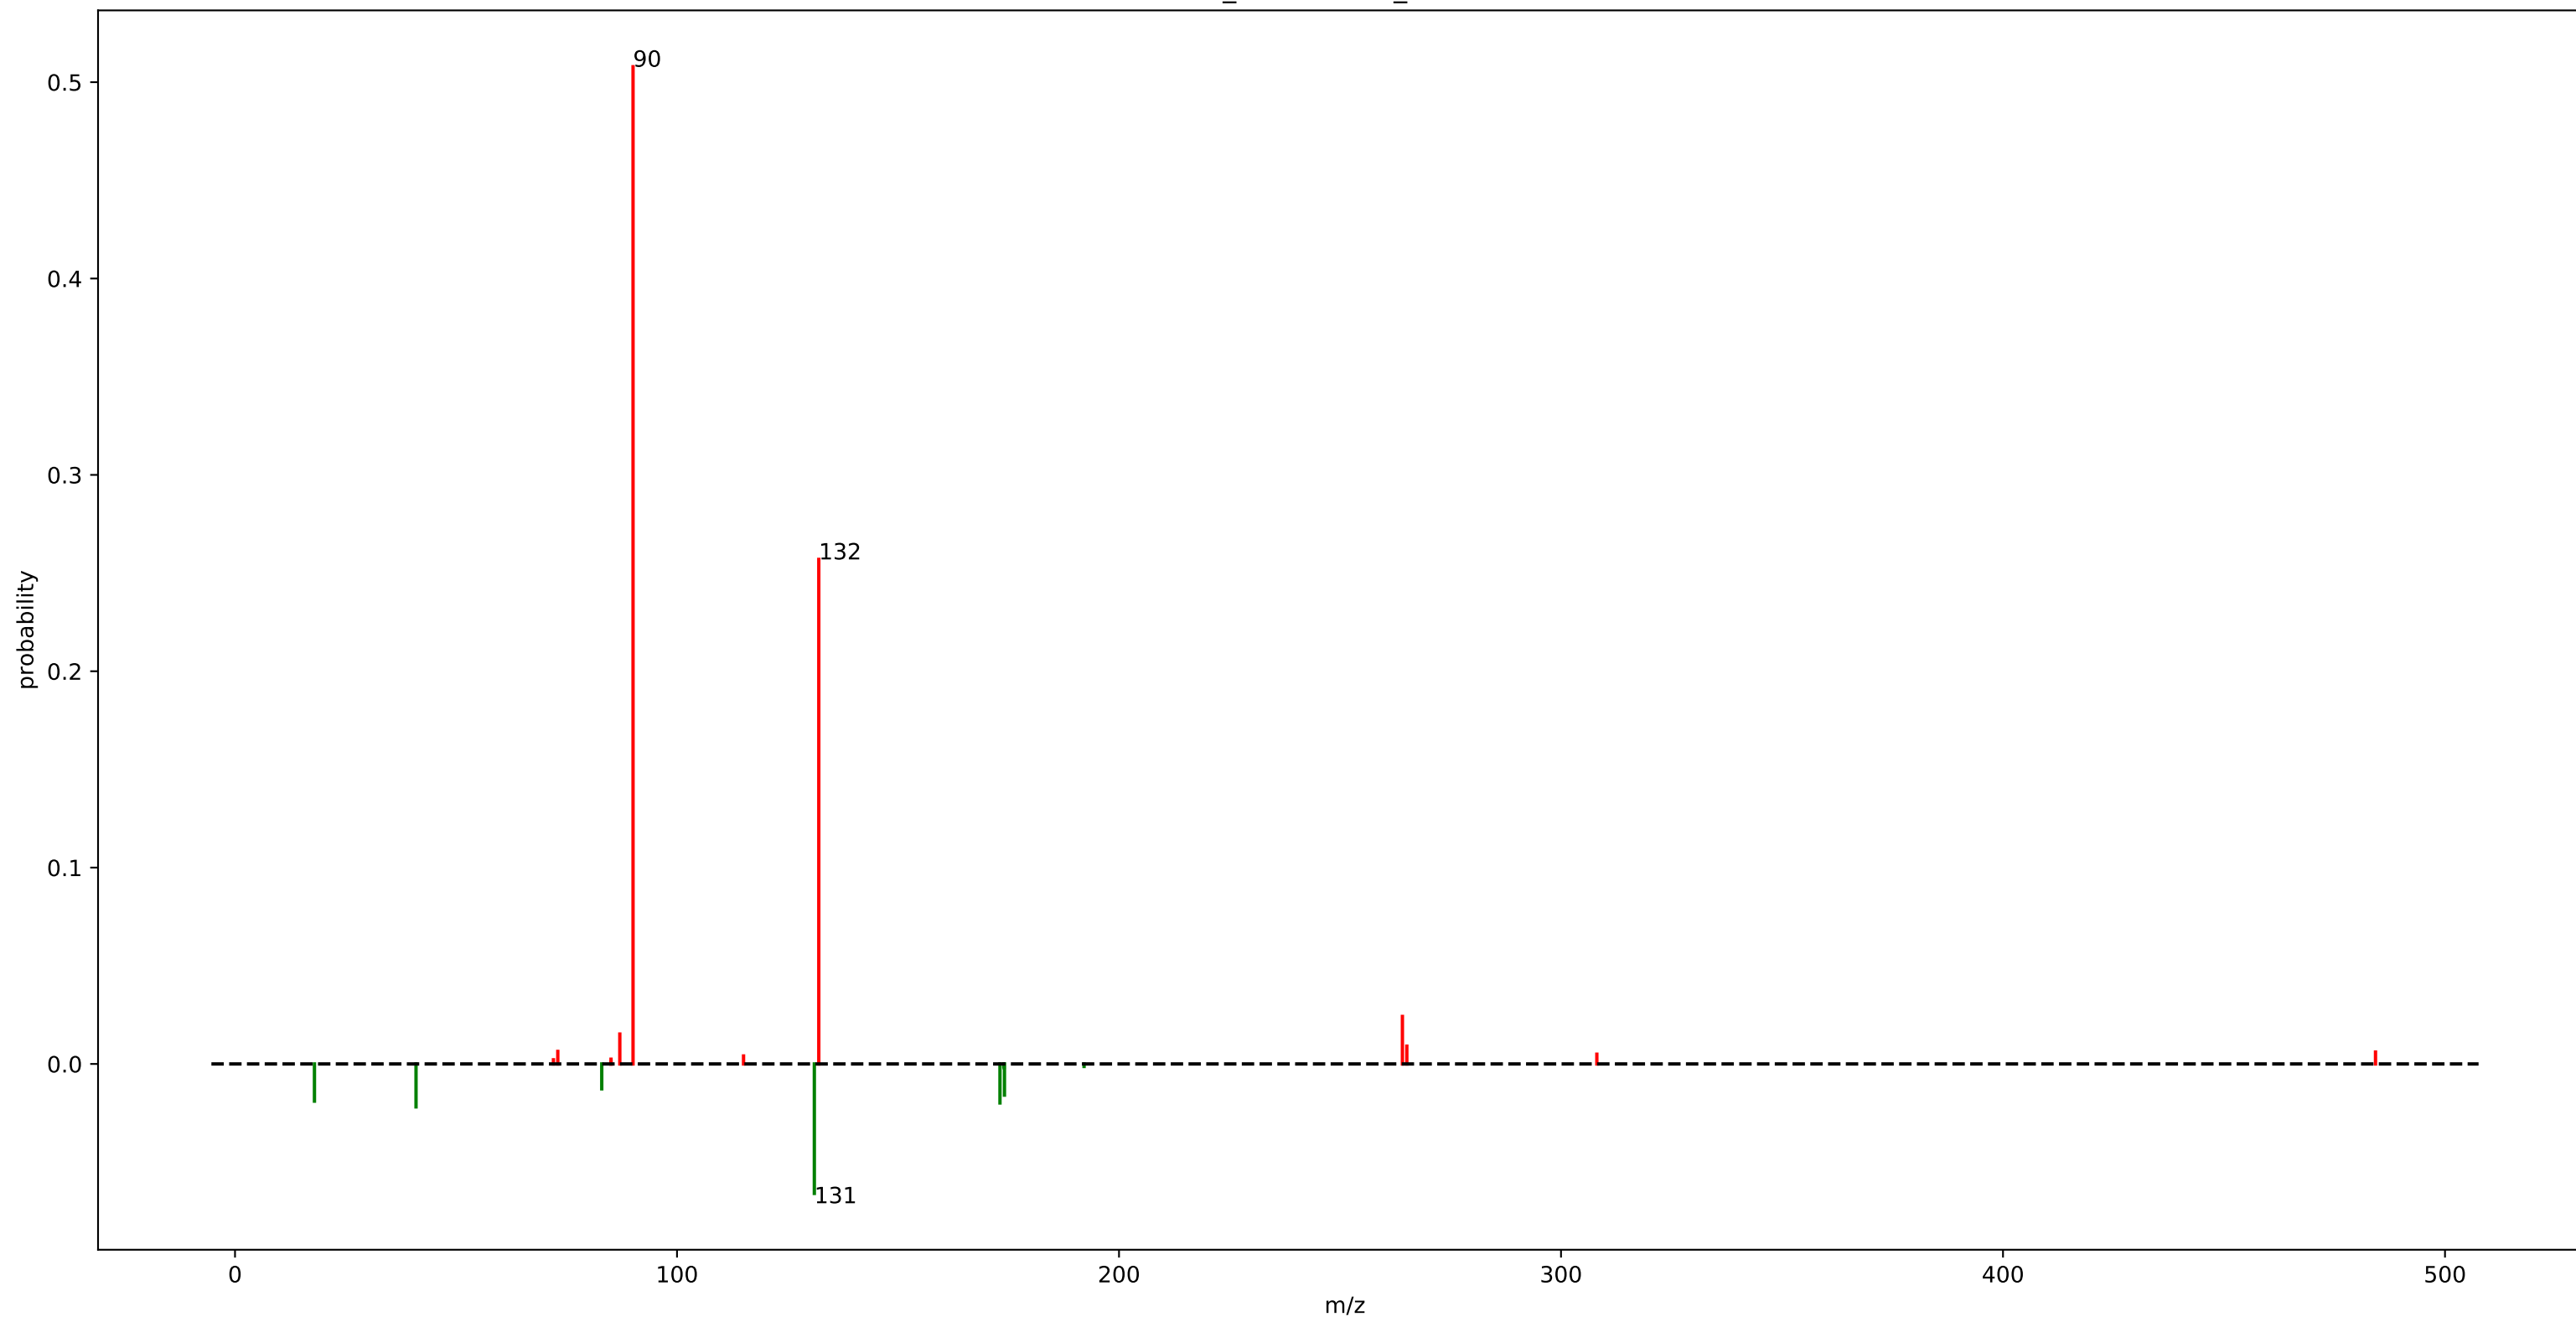

## urine\_mass2motif\_192.m2m

|                   |        |
|-------------------|--------|
| fragment_90.0525  | : 0.51 |
| fragment_132.0775 | : 0.26 |
| loss_131.0675     | : 0.07 |
| fragment_264.1175 | : 0.02 |
| loss_40.9525      | : 0.02 |
| loss_173.0675     | : 0.02 |
| loss_17.9725      | : 0.02 |
| loss_174.0825     | : 0.02 |
| fragment_87.0575  | : 0.02 |
| loss_82.9725      | : 0.01 |
| fragment_265.1175 | : 0.01 |
| fragment_73.0275  | : 0.01 |
| fragment_484.2775 | : 0.01 |



euphorbia\_motif\_0.m2m

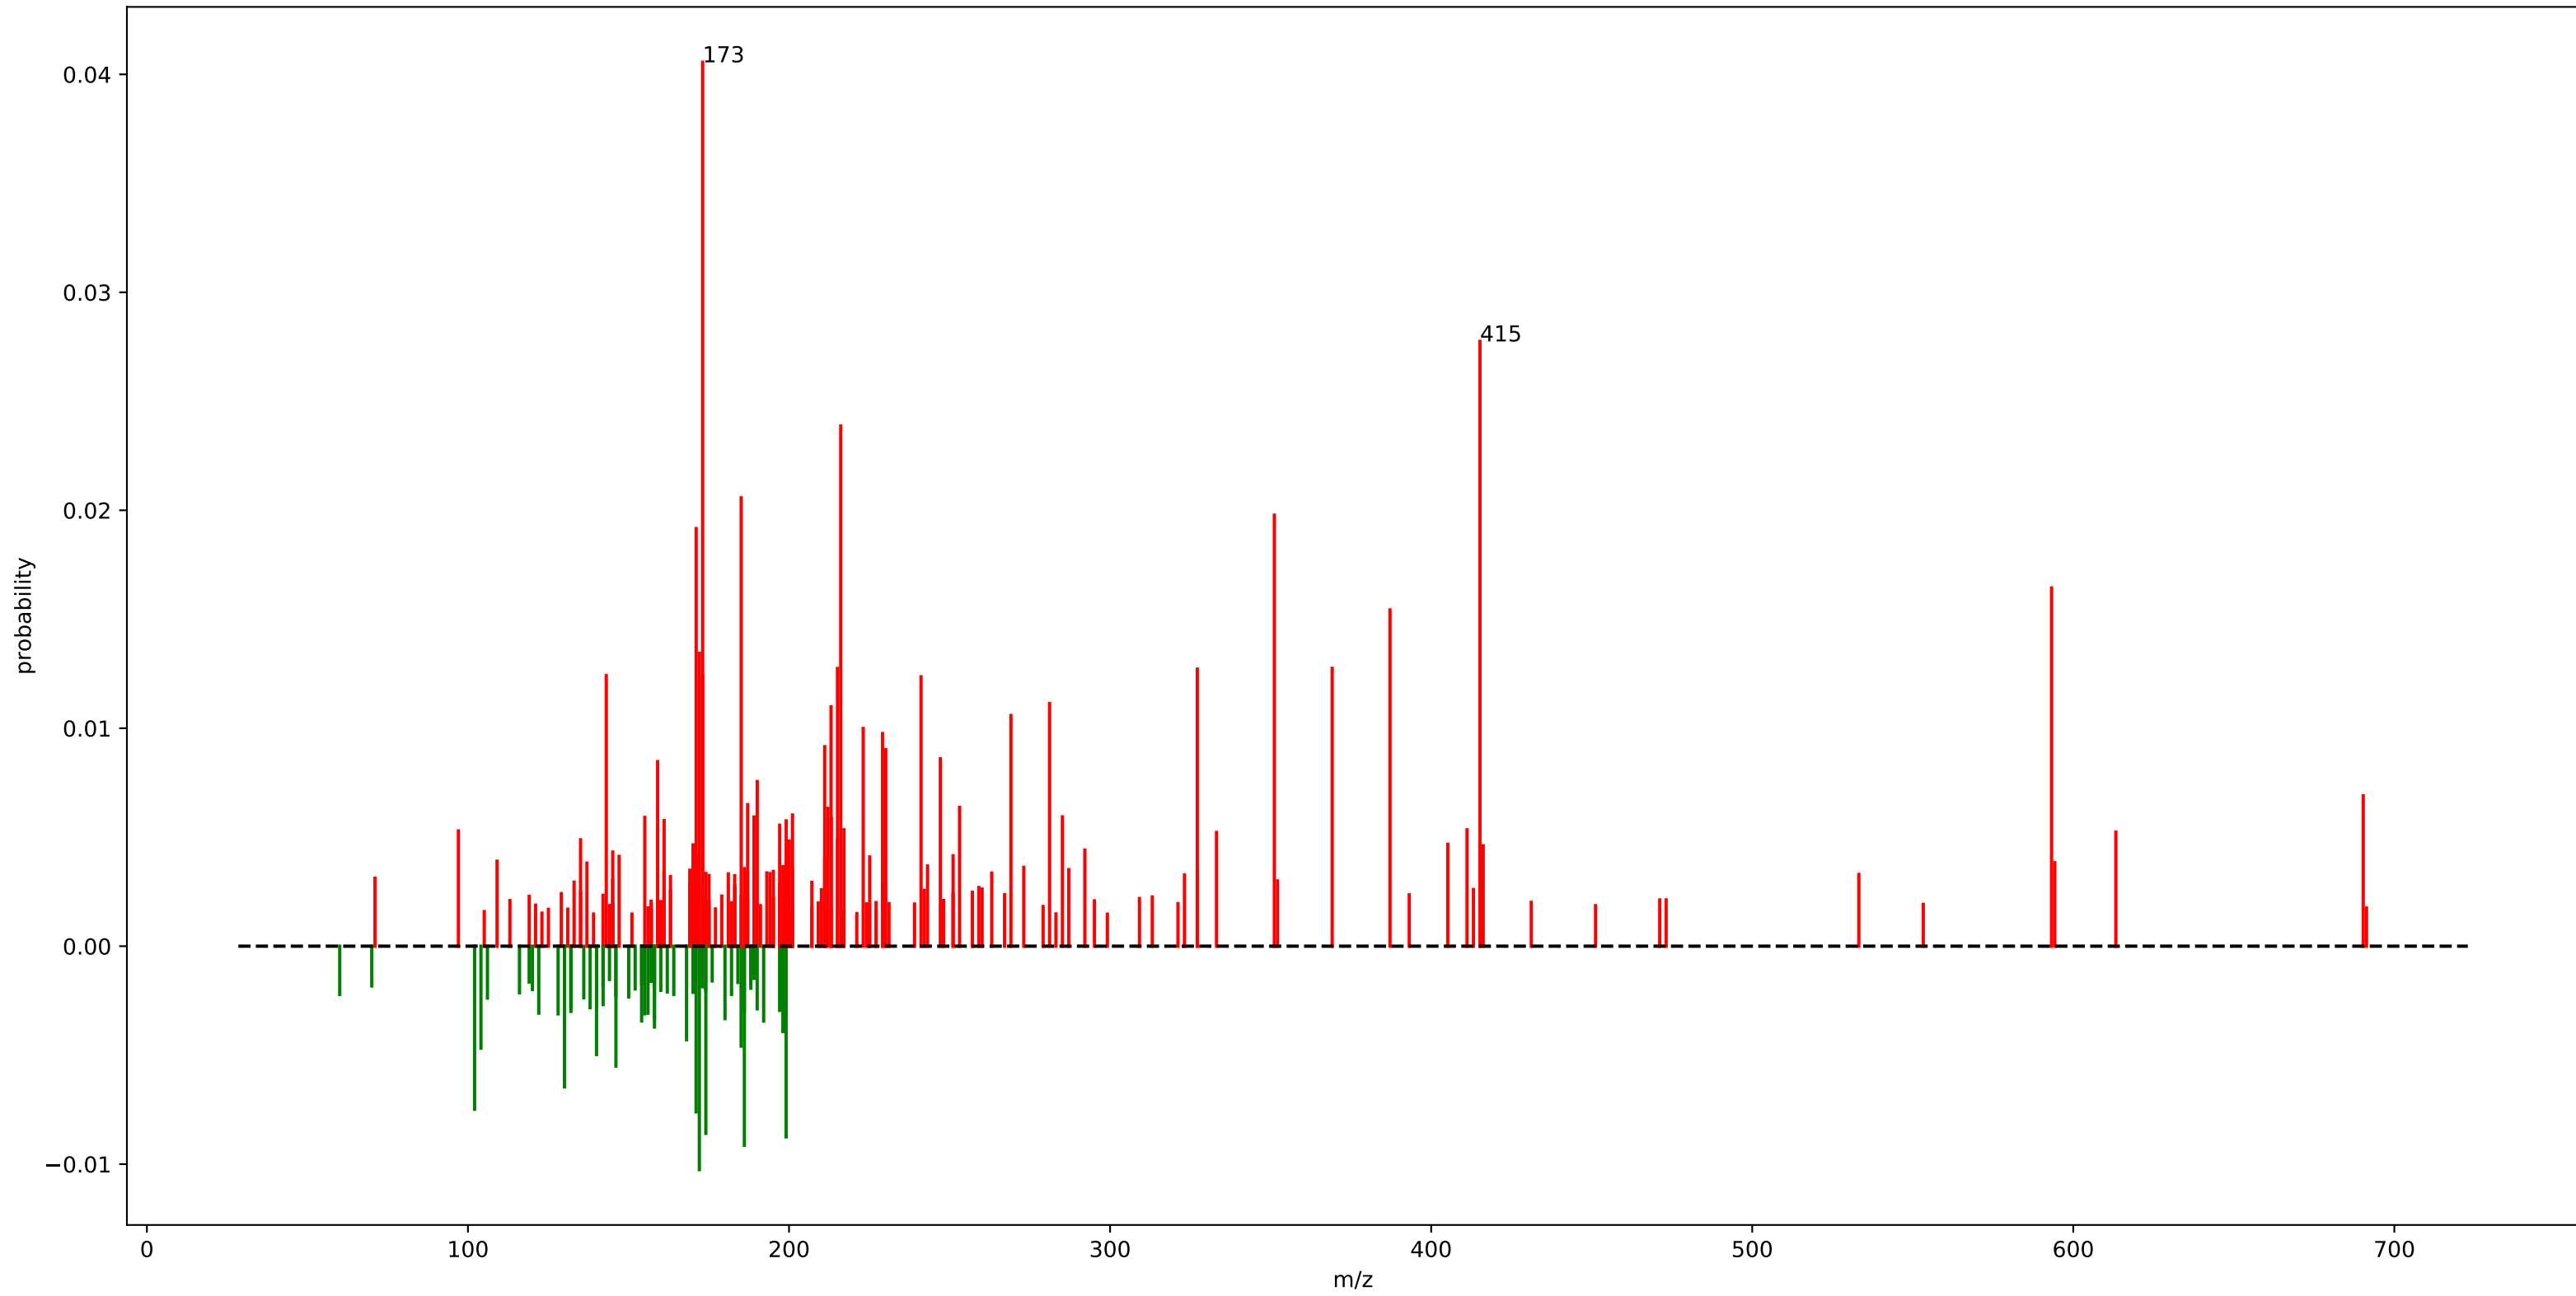

# euphorbia\_motif\_0.m2m

|                   |        |                   |        |                   |        |
|-------------------|--------|-------------------|--------|-------------------|--------|
| fragment_173.0975 | : 0.04 | fragment_229.1225 | : 0.01 | fragment_213.1275 | : 0.01 |
| fragment_415.2075 | : 0.03 | fragment_211.1125 | : 0.01 | fragment_161.0975 | : 0.01 |
| fragment_216.1125 | : 0.02 | loss_186.0925     | : 0.01 | fragment_199.1125 | : 0.01 |
| fragment_185.0975 | : 0.02 | fragment_230.1275 | : 0.01 | fragment_197.0975 | : 0.01 |
| fragment_351.1625 | : 0.02 | loss_199.0975     | : 0.01 | loss_146.0925     | : 0.01 |
| fragment_171.0775 | : 0.02 | fragment_247.1325 | : 0.01 | fragment_159.0775 | : 0.01 |
| fragment_593.2375 | : 0.02 | loss_174.0875     | : 0.01 | fragment_217.1175 | : 0.01 |
| fragment_387.1775 | : 0.02 | fragment_159.0825 | : 0.01 | fragment_411.1825 | : 0.01 |
| fragment_172.0875 | : 0.01 | loss_171.0625     | : 0.01 | fragment_97.0275  | : 0.01 |
| fragment_369.1725 | : 0.01 | fragment_190.0975 | : 0.01 | fragment_613.2625 | : 0.01 |
| fragment_215.1075 | : 0.01 | loss_102.0675     | : 0.01 | fragment_333.1525 | : 0.01 |
| fragment_327.1575 | : 0.01 | fragment_690.3075 | : 0.01 |                   |        |
| fragment_143.0825 | : 0.01 | fragment_187.1125 | : 0.01 |                   |        |
| fragment_173.0925 | : 0.01 | loss_130.0625     | : 0.01 |                   |        |
| fragment_241.1225 | : 0.01 | fragment_253.1225 | : 0.01 |                   |        |
| fragment_281.1575 | : 0.01 | fragment_212.1175 | : 0.01 |                   |        |
| fragment_213.0925 | : 0.01 | fragment_201.0925 | : 0.01 |                   |        |
| fragment_269.1175 | : 0.01 | fragment_285.1475 | : 0.01 |                   |        |
| loss_172.0725     | : 0.01 | fragment_189.0875 | : 0.01 |                   |        |
| fragment_223.1075 | : 0.01 | fragment_155.0825 | : 0.01 |                   |        |

gnps\_motif\_54.m2m

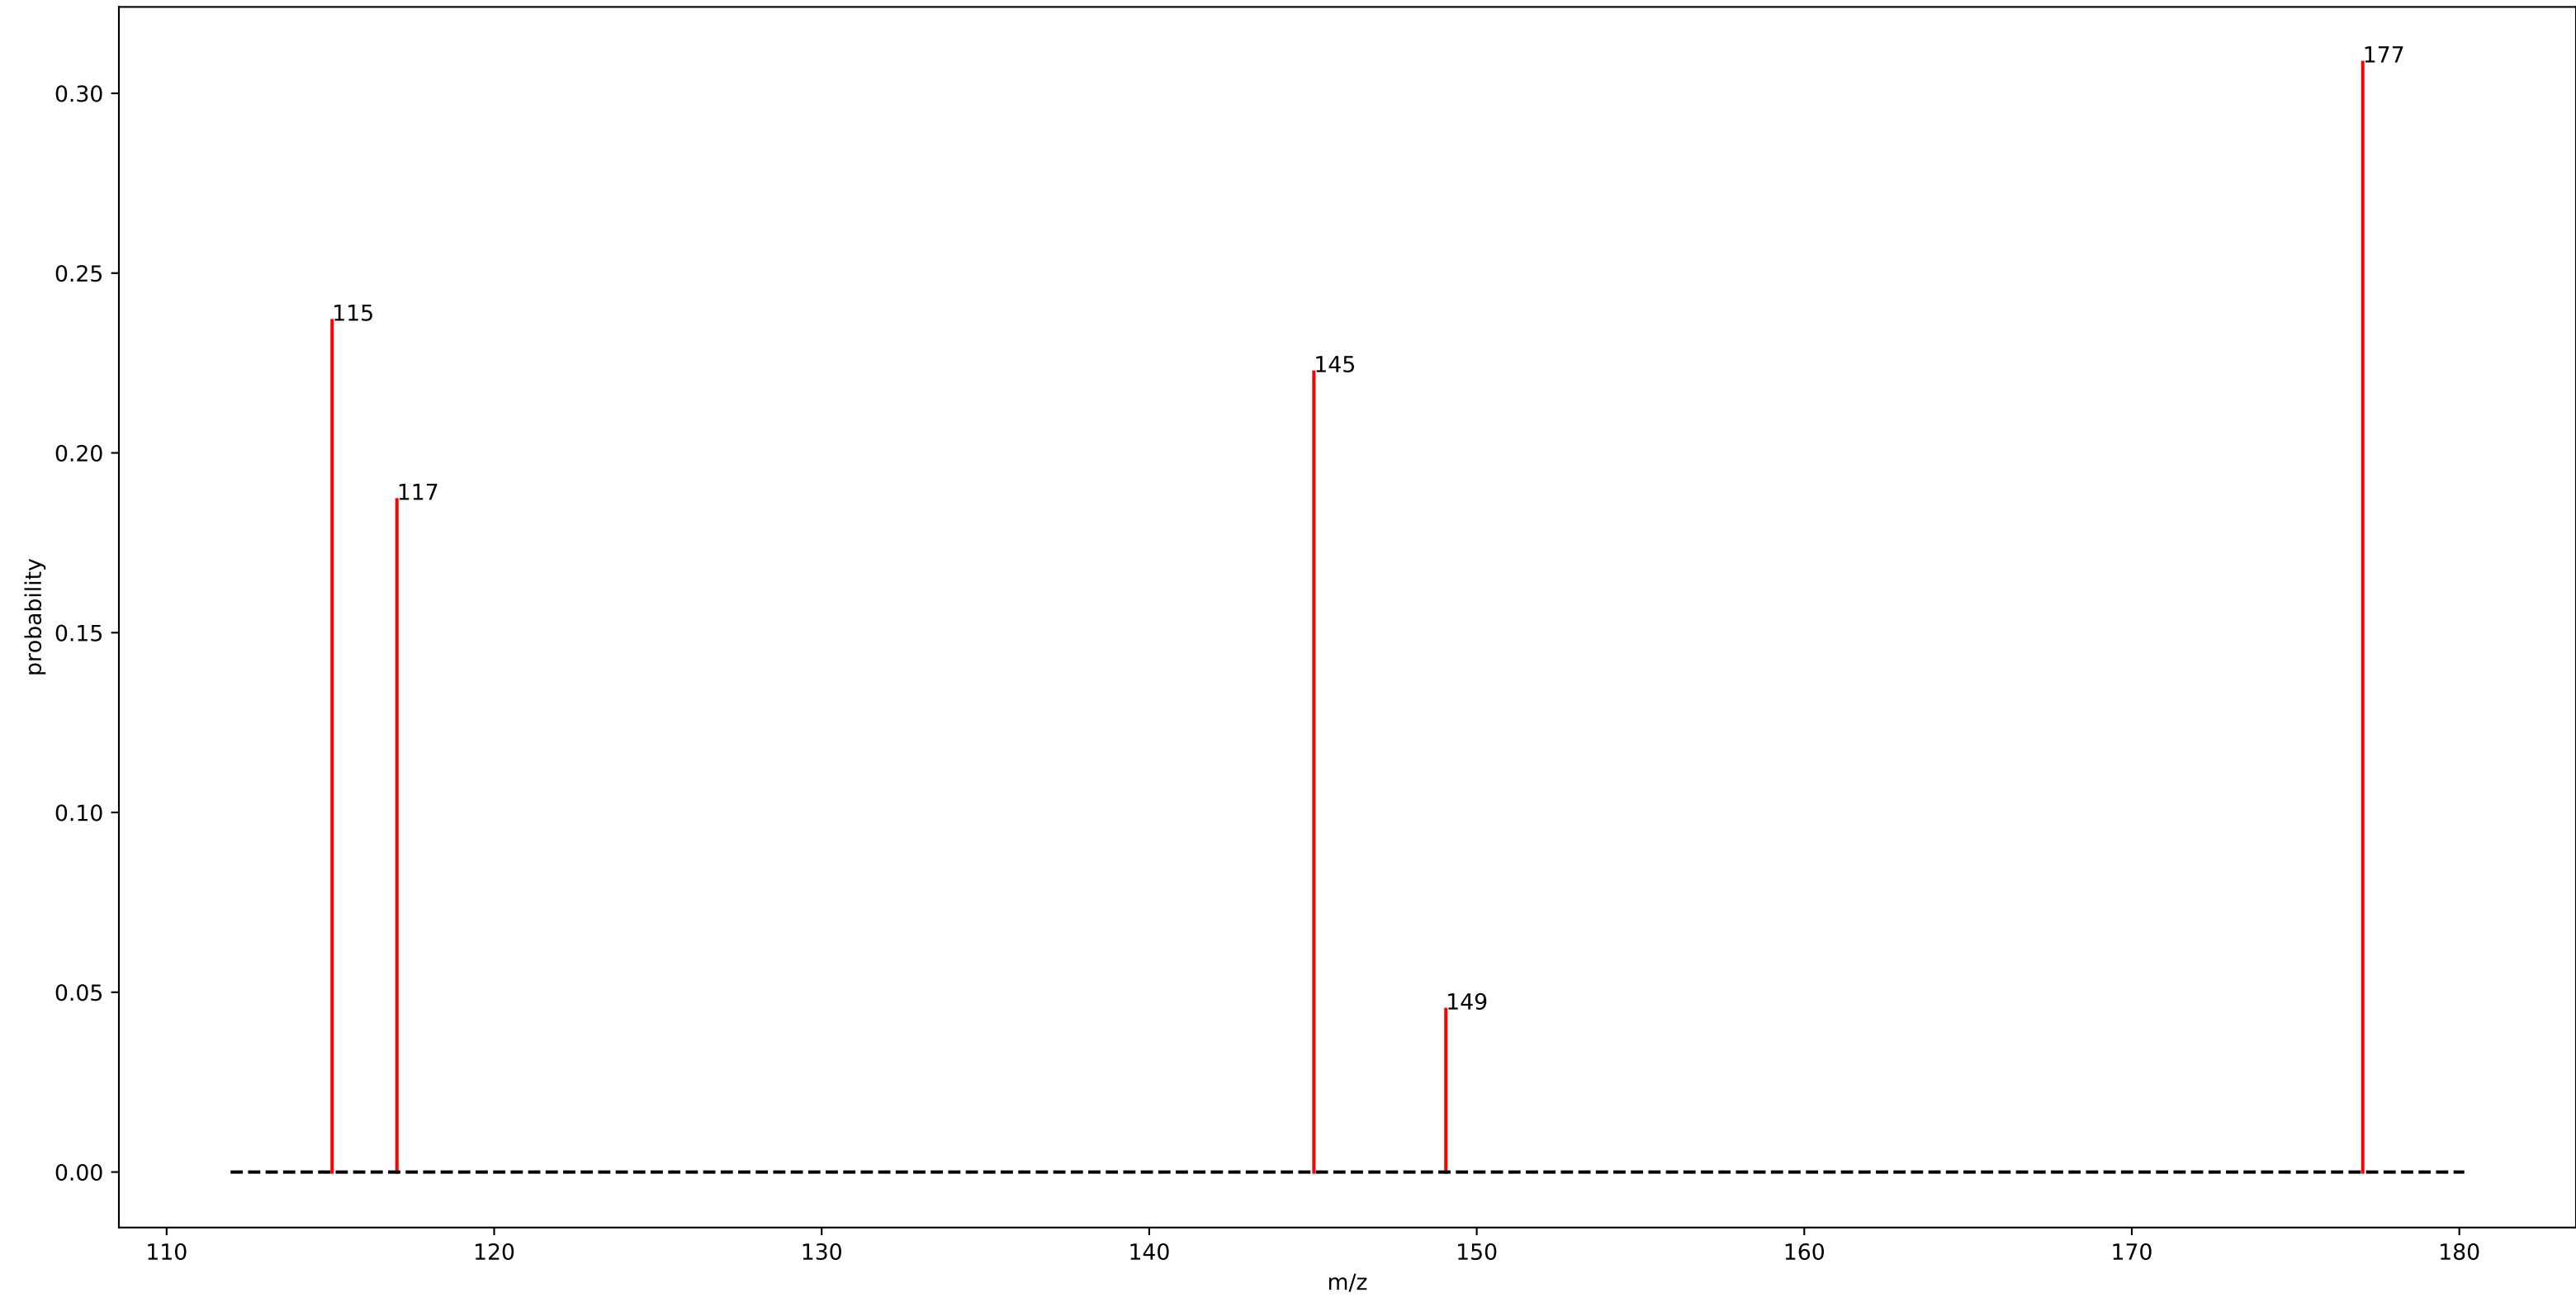

## gnps\_motif\_54.m2m

|                   |        |
|-------------------|--------|
| fragment_177.0525 | : 0.31 |
| fragment_115.0525 | : 0.24 |
| fragment_145.0275 | : 0.22 |
| fragment_117.0325 | : 0.19 |
| fragment_149.0575 | : 0.05 |

euphorbia\_motif\_265.m2m

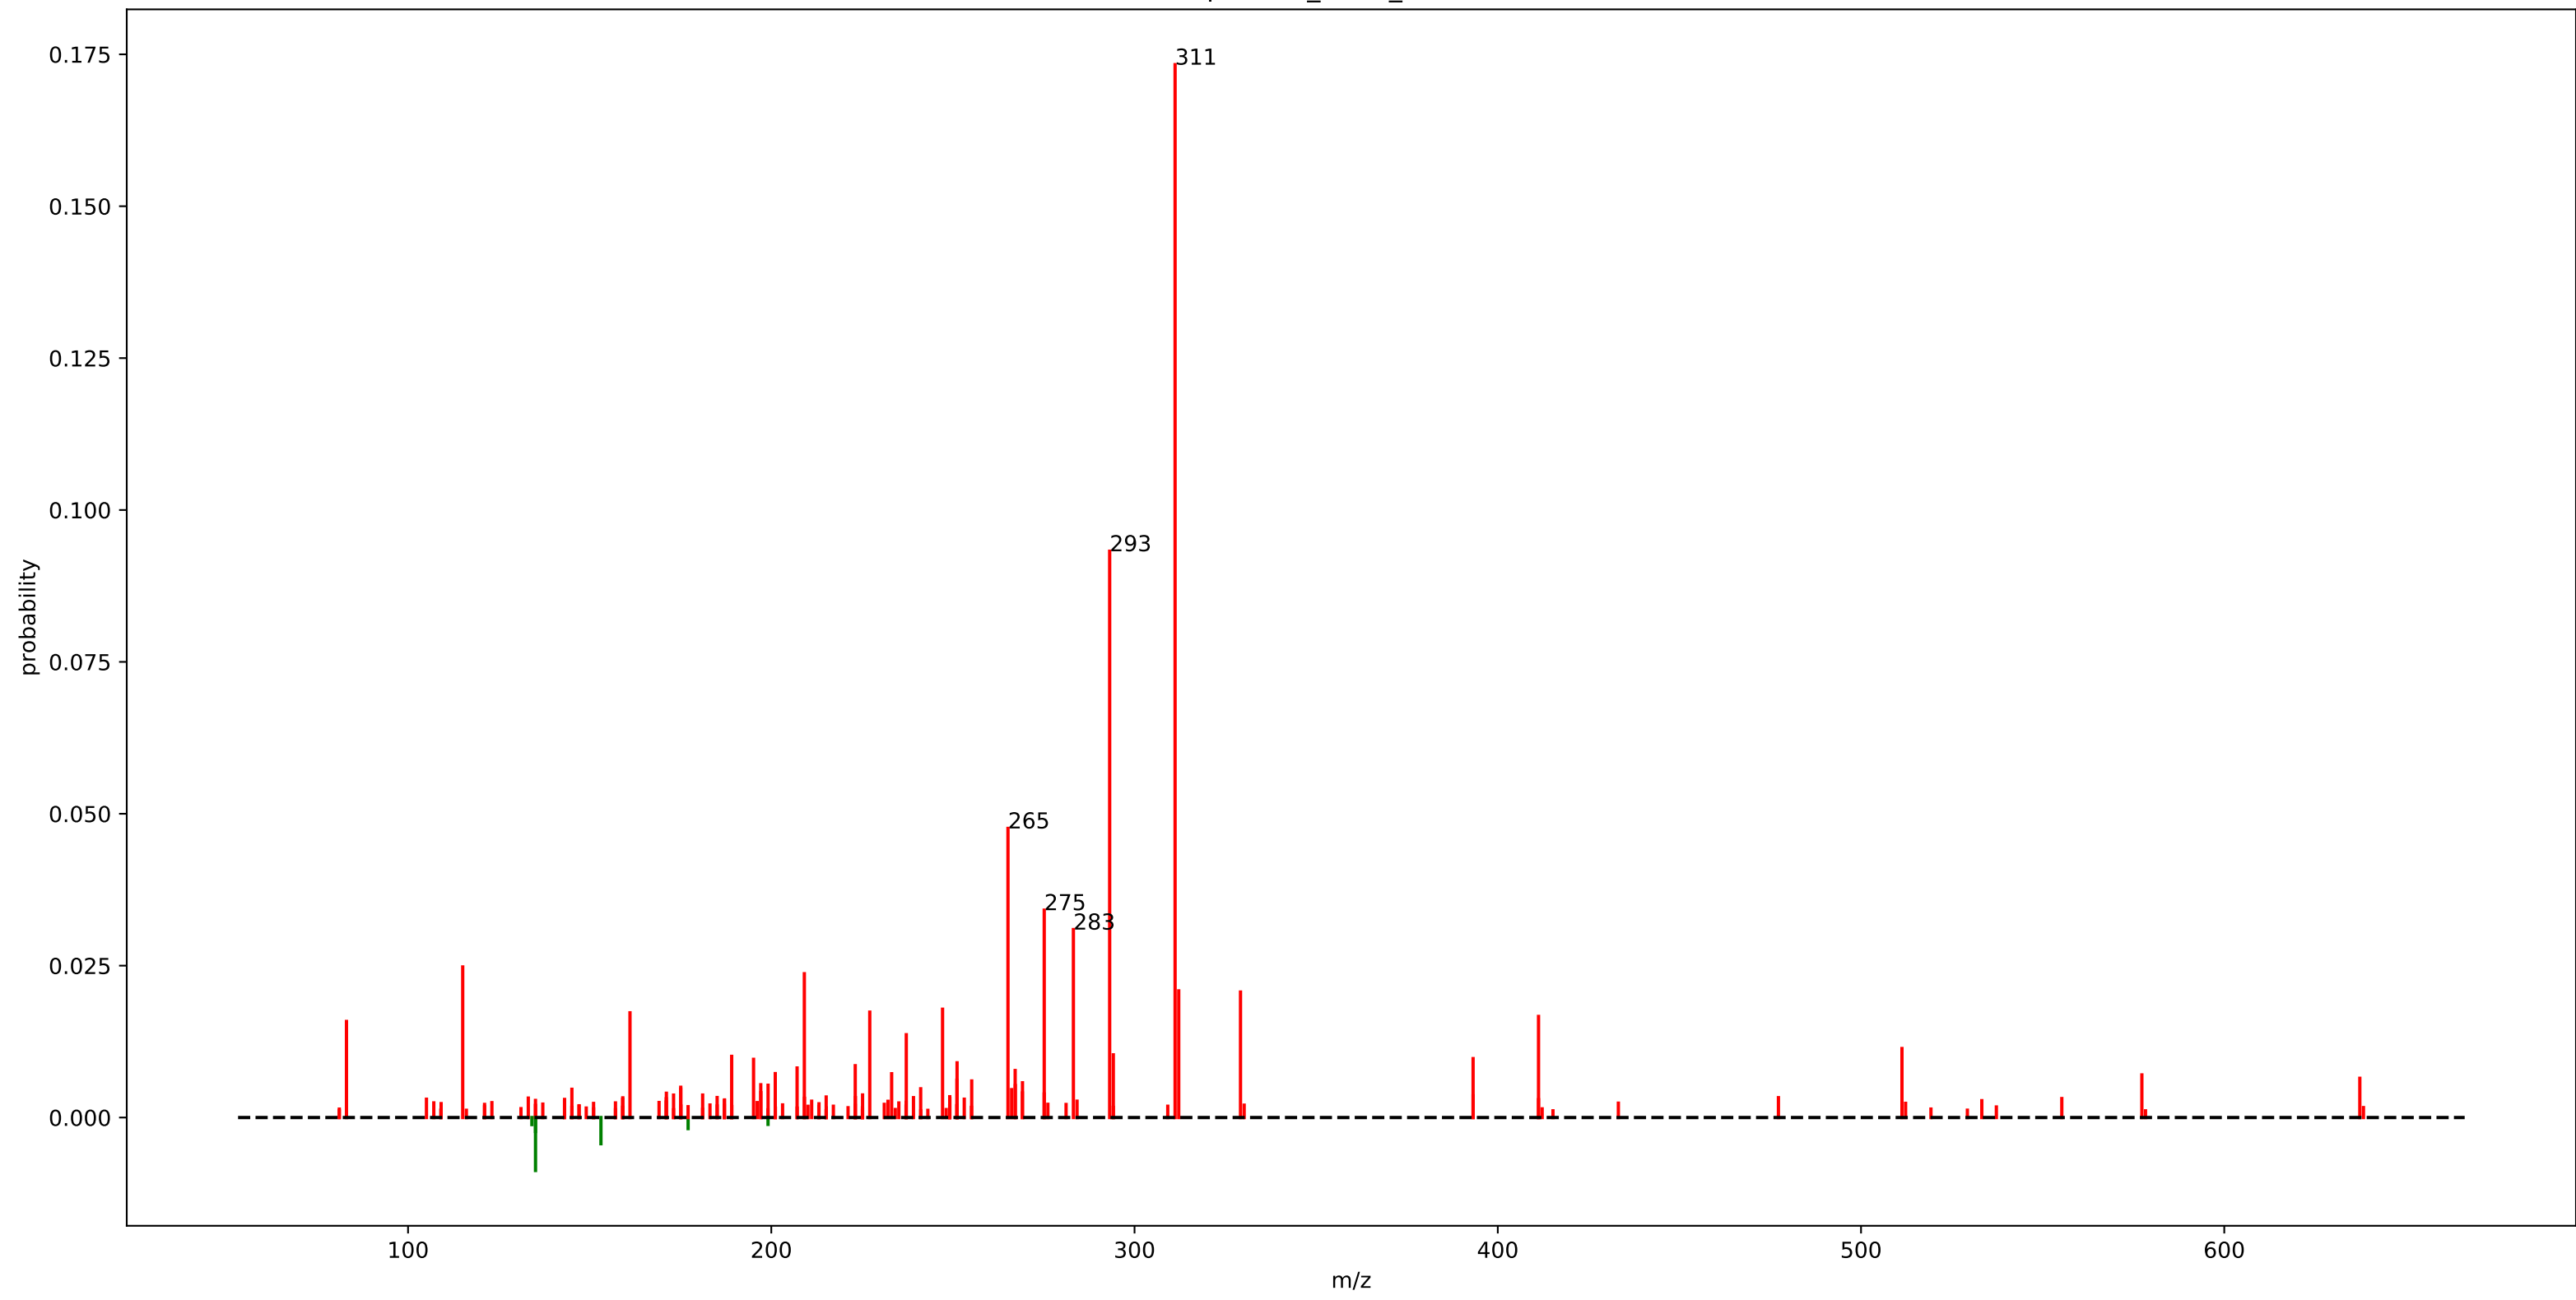

# euphorbia\_motif\_265.m2m

|                   |        |                   |        |
|-------------------|--------|-------------------|--------|
| fragment_311.1625 | : 0.17 | fragment_251.1425 | : 0.01 |
| fragment_293.1525 | : 0.09 | loss_135.0925     | : 0.01 |
| fragment_265.1575 | : 0.05 | fragment_223.1125 | : 0.01 |
| fragment_275.1375 | : 0.03 | fragment_207.1025 | : 0.01 |
| fragment_283.1675 | : 0.03 | fragment_267.1375 | : 0.01 |
| fragment_115.0525 | : 0.02 | fragment_201.0925 | : 0.01 |
| fragment_209.0975 | : 0.02 | fragment_233.1325 | : 0.01 |
| fragment_312.1675 | : 0.02 | fragment_577.3125 | : 0.01 |
| fragment_329.1725 | : 0.02 | fragment_637.3175 | : 0.01 |
| fragment_247.1475 | : 0.02 | fragment_251.1075 | : 0.01 |
| fragment_227.1075 | : 0.02 | fragment_255.1725 | : 0.01 |
| fragment_161.0975 | : 0.02 | fragment_269.1525 | : 0.01 |
| fragment_411.2175 | : 0.02 | fragment_197.0975 | : 0.01 |
| fragment_83.0475  | : 0.02 | fragment_199.1125 | : 0.01 |
| fragment_237.1625 | : 0.01 | fragment_267.1725 | : 0.01 |
| fragment_511.2675 | : 0.01 |                   |        |
| fragment_294.1575 | : 0.01 |                   |        |
| fragment_189.0925 | : 0.01 |                   |        |
| fragment_393.2025 | : 0.01 |                   |        |
| fragment_195.1175 | : 0.01 |                   |        |

motif\_494

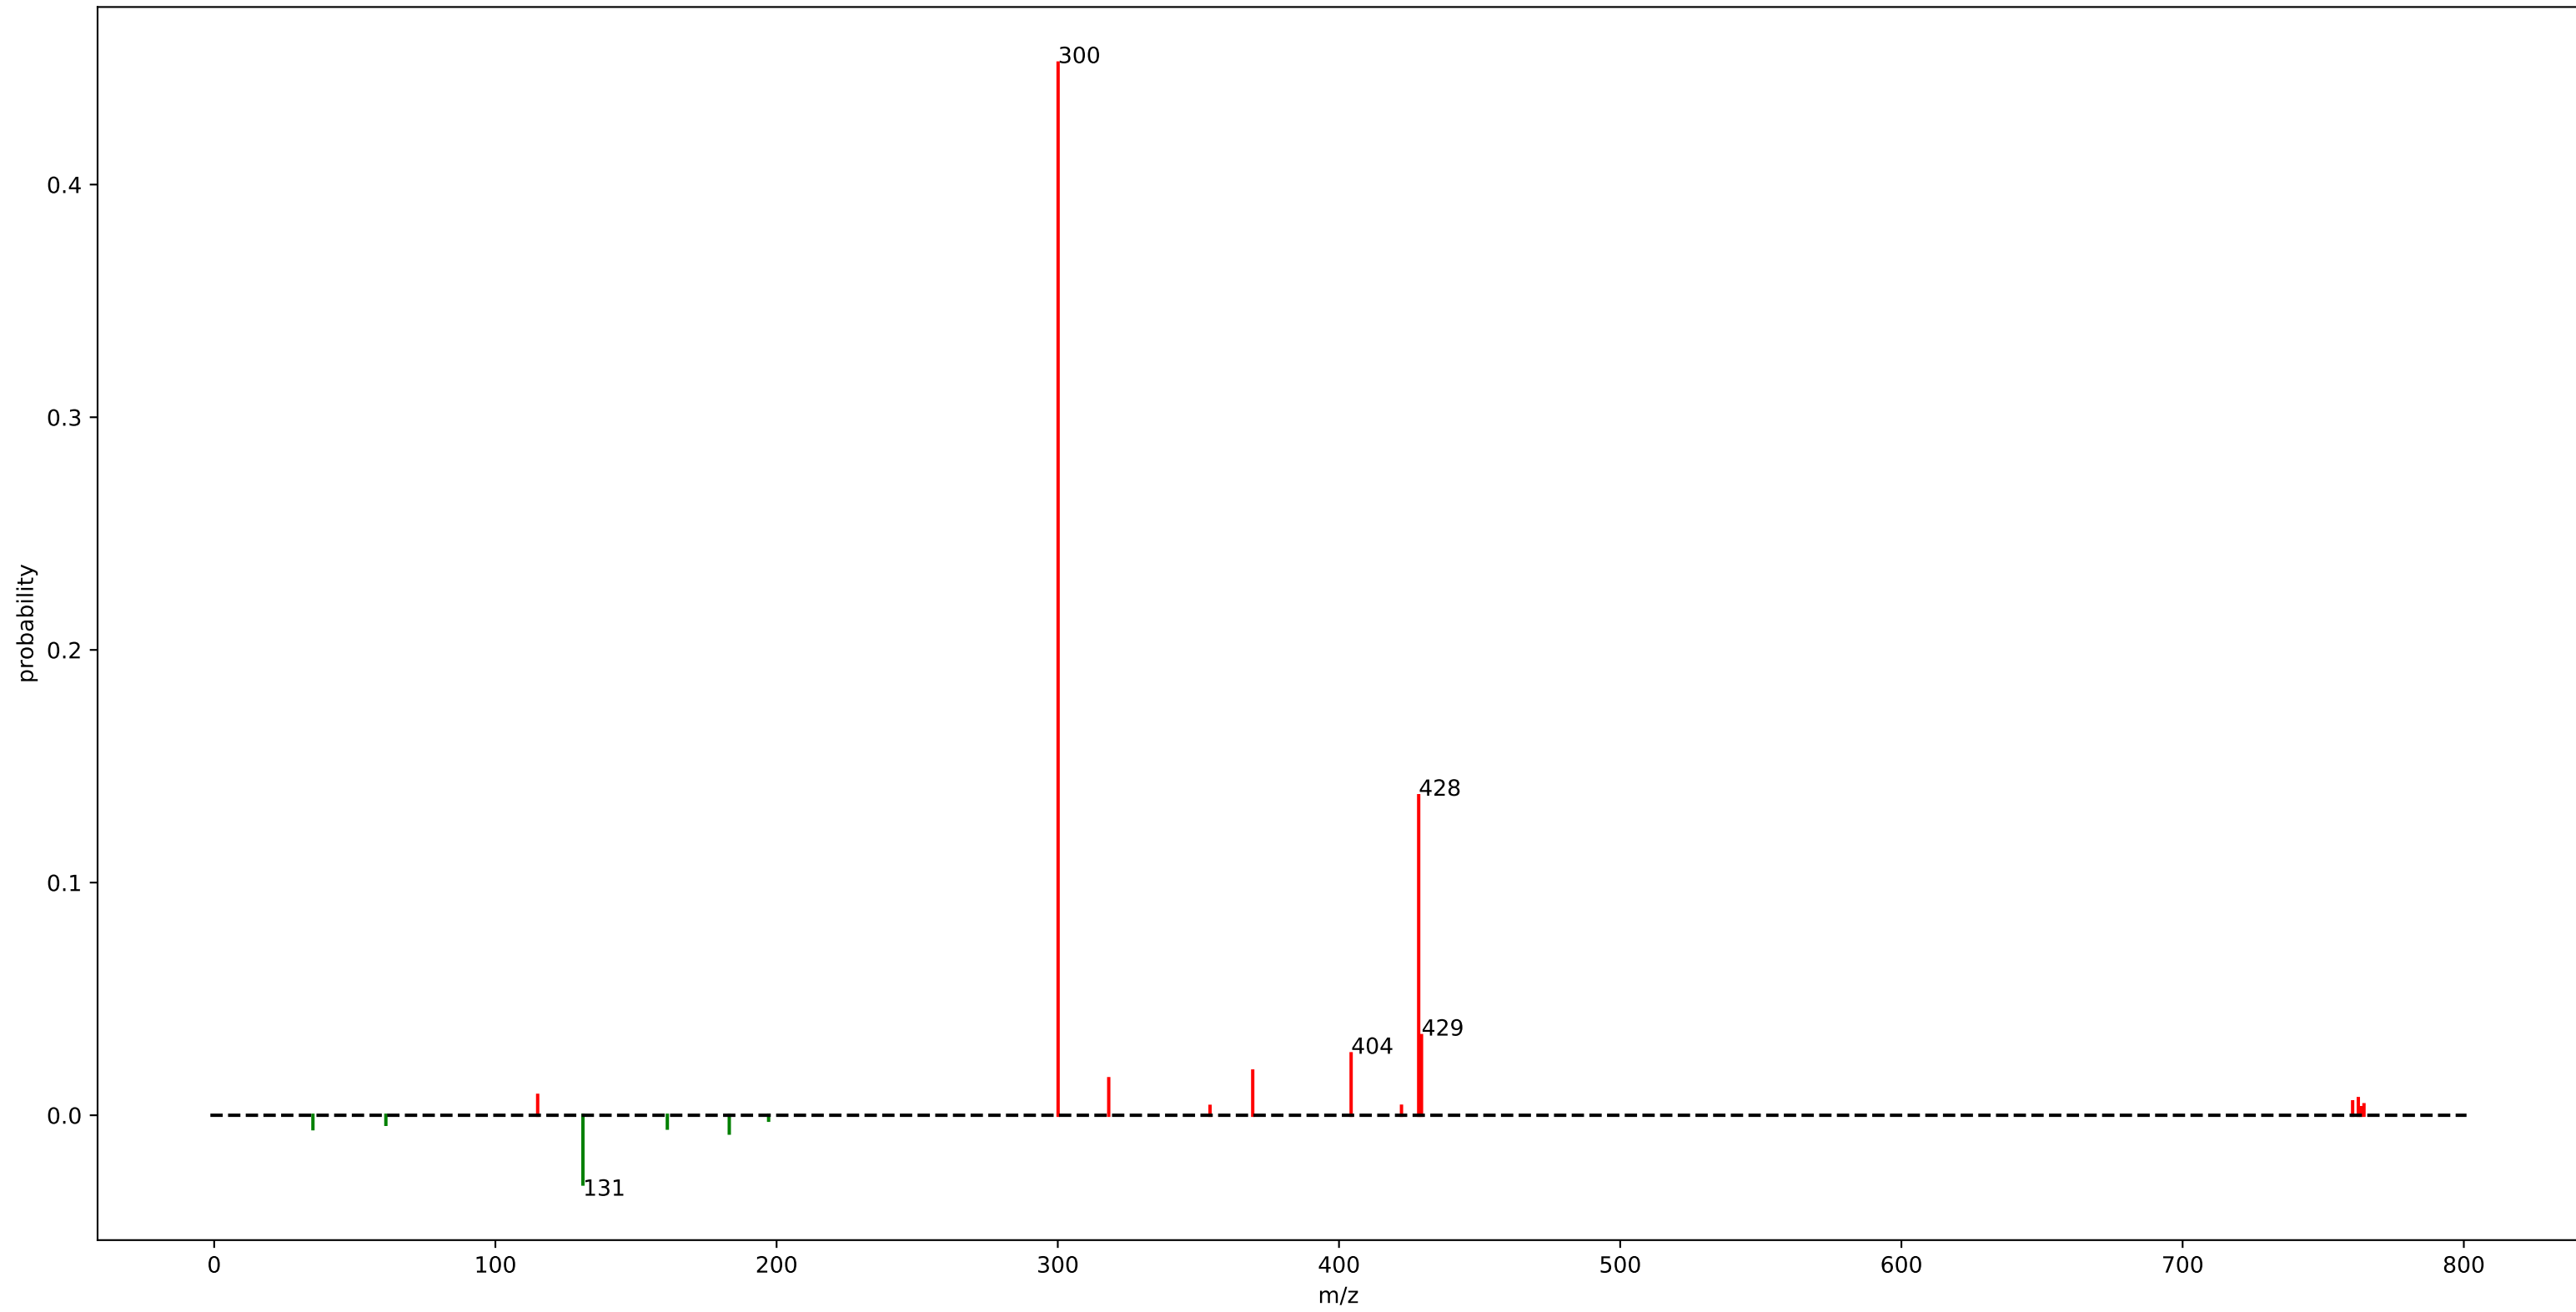

## motif\_494

|                   |        |
|-------------------|--------|
| fragment_300.1075 | : 0.45 |
| fragment_428.3375 | : 0.14 |
| fragment_429.3425 | : 0.03 |
| loss_131.1375     | : 0.03 |
| fragment_404.3125 | : 0.03 |
| fragment_369.3225 | : 0.02 |
| fragment_318.1175 | : 0.02 |
| fragment_115.0375 | : 0.01 |
| loss_183.1725     | : 0.01 |
| fragment_762.4775 | : 0.01 |
| loss_35.1175      | : 0.01 |
| fragment_760.4625 | : 0.01 |
| loss_161.1475     | : 0.01 |



gnps\_motif\_38.m2m

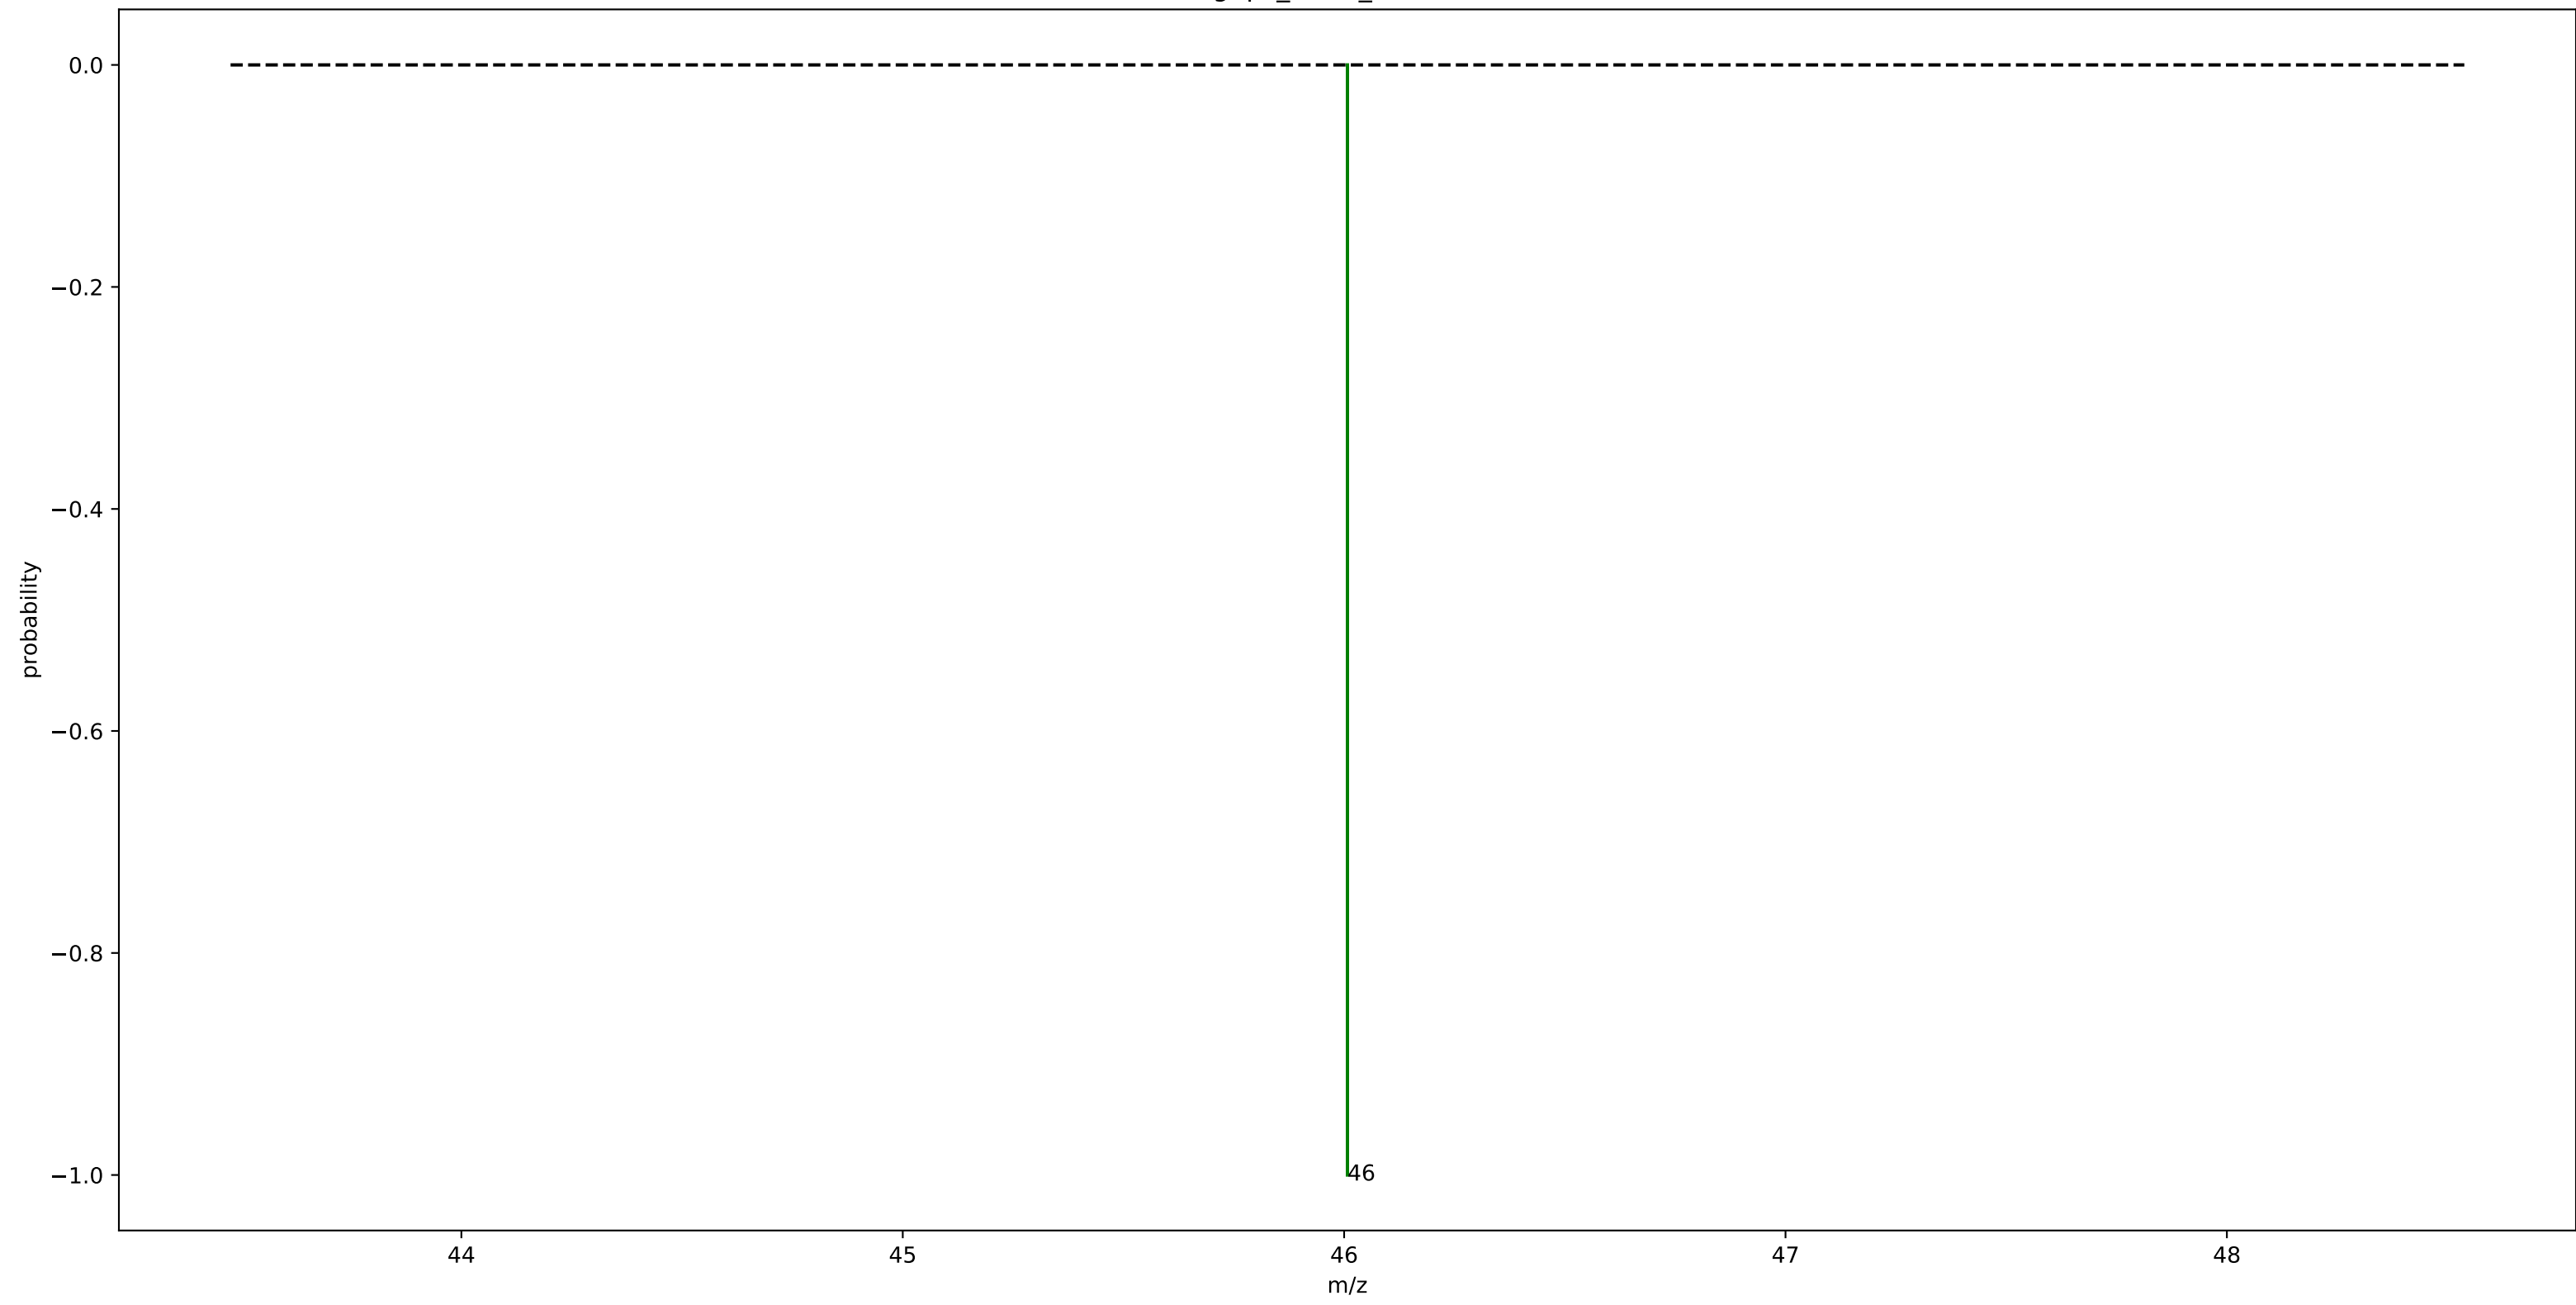

# gnps\_motif\_38.m2m

loss\_46.0075 : 1.00

euphorbia\_motif\_333.m2m

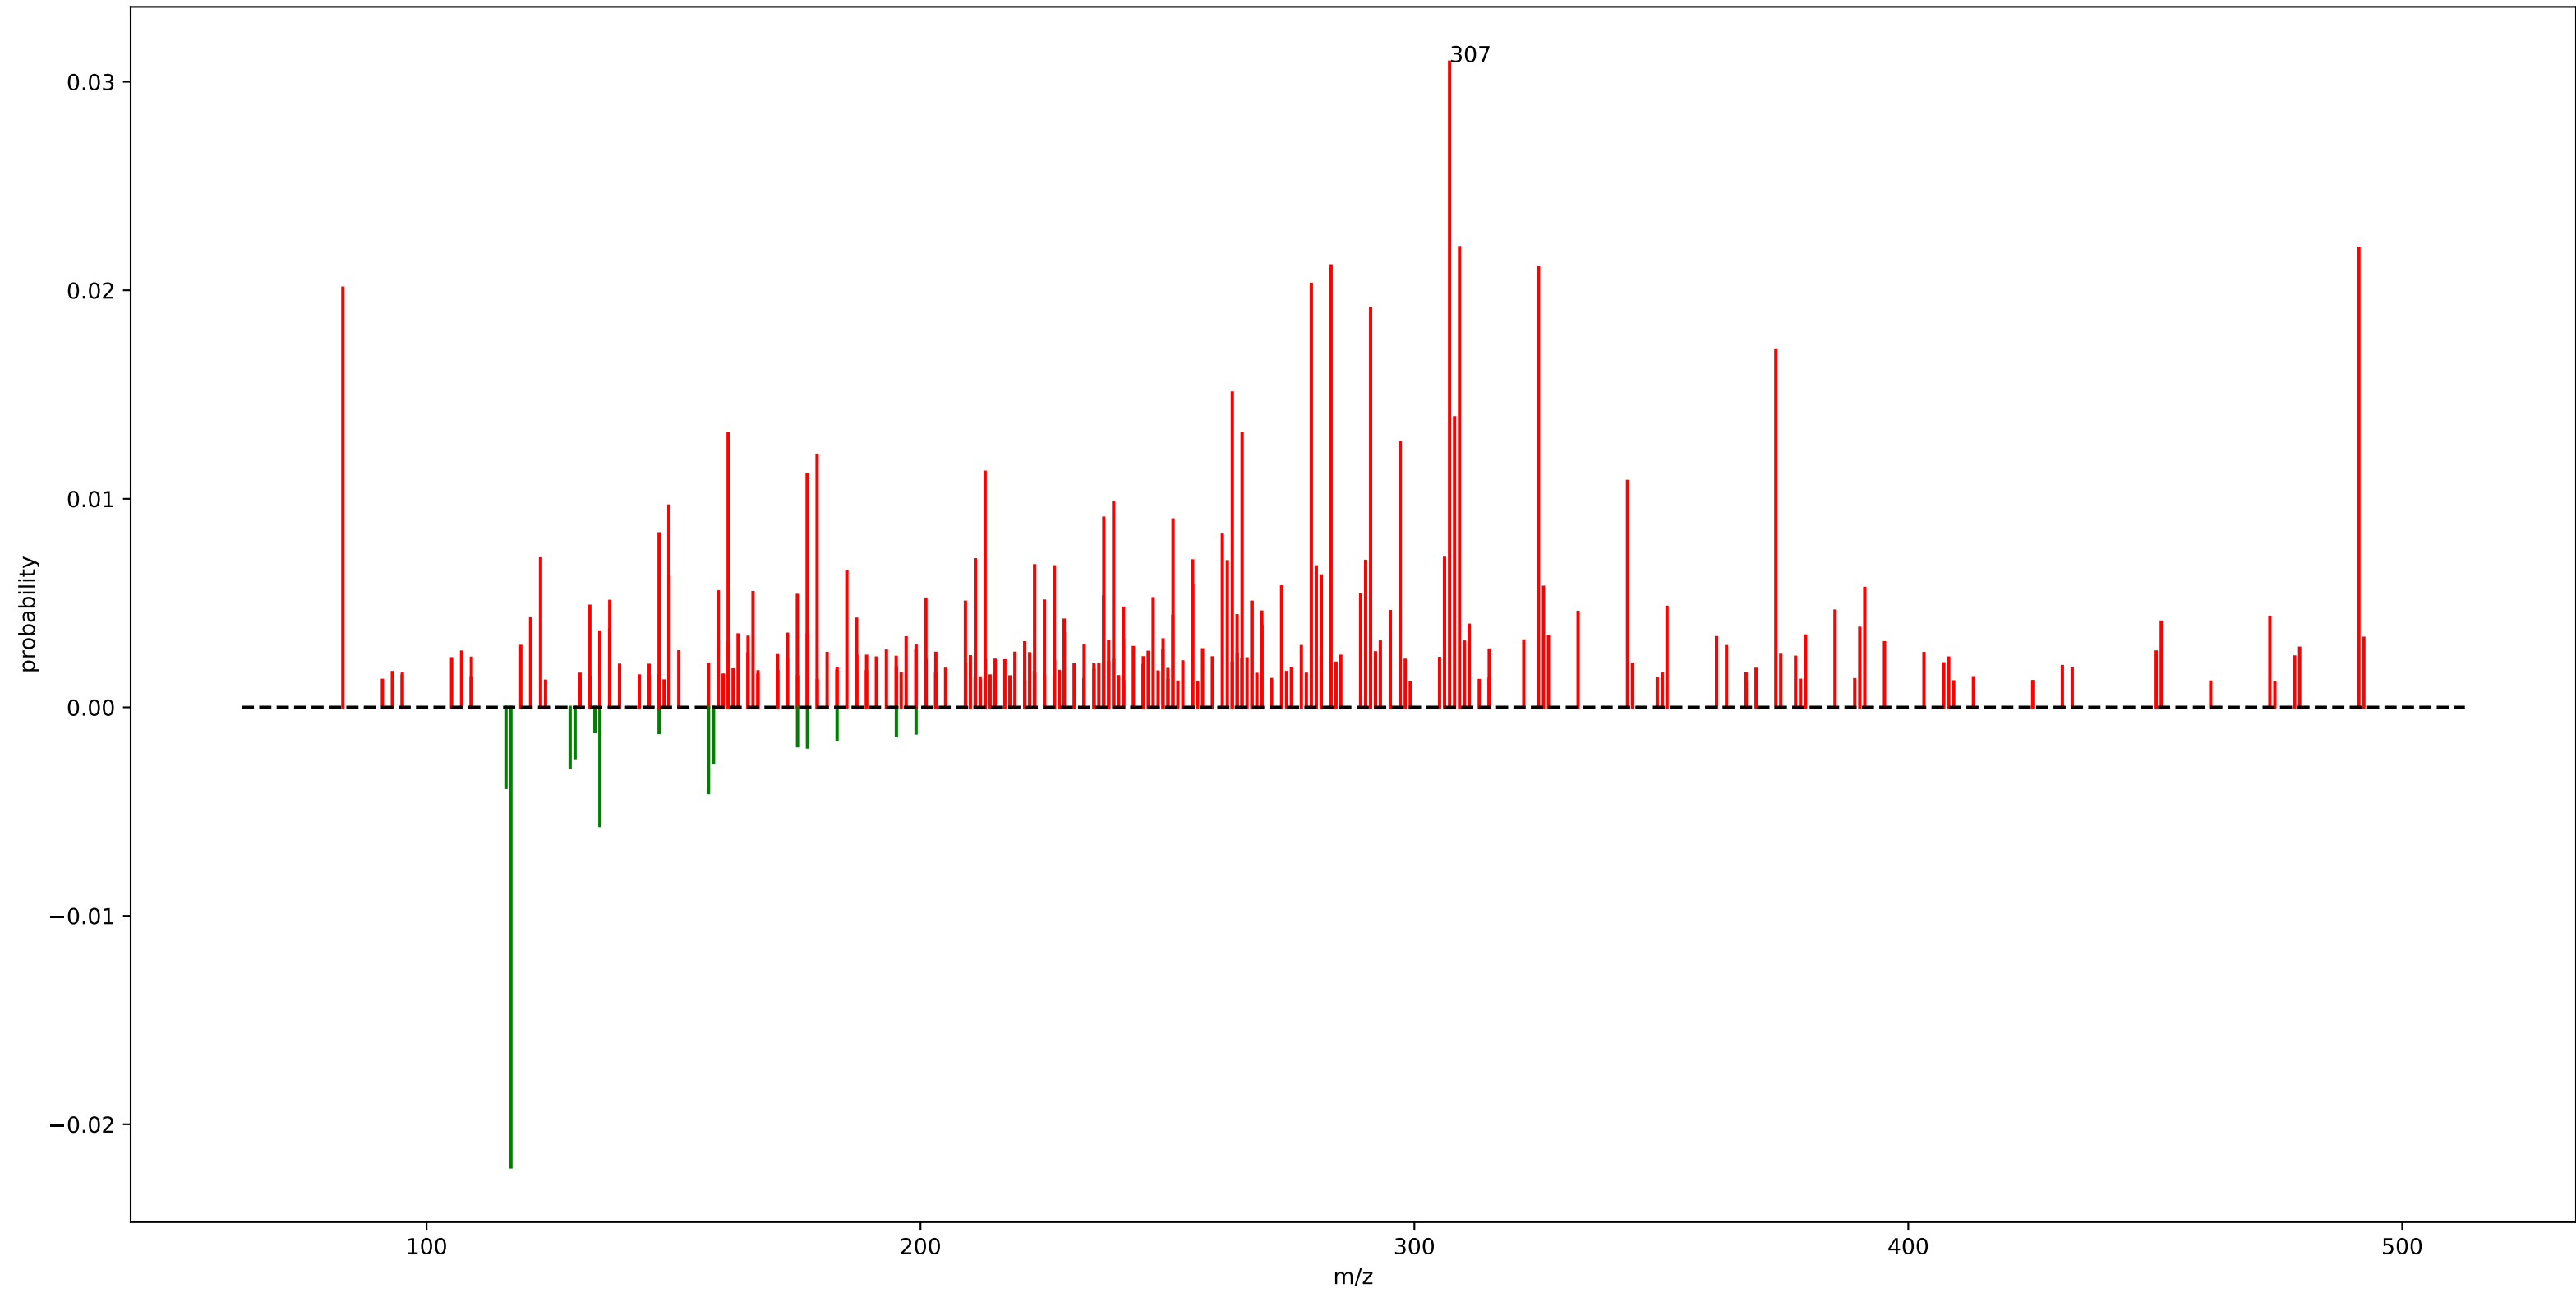

# euphorbia\_motif\_333.m2m

|                   |        |                   |        |                   |        |
|-------------------|--------|-------------------|--------|-------------------|--------|
| fragment_307.1275 | : 0.03 | fragment_149.0575 | : 0.01 | fragment_391.1875 | : 0.01 |
| fragment_309.1475 | : 0.02 | fragment_237.1225 | : 0.01 | loss_135.0925     | : 0.01 |
| loss_117.0775     | : 0.02 | fragment_251.1425 | : 0.01 | fragment_159.0775 | : 0.01 |
| fragment_491.2275 | : 0.02 | fragment_147.0775 | : 0.01 | fragment_166.0975 | : 0.01 |
| fragment_283.1325 | : 0.02 | fragment_261.1225 | : 0.01 | fragment_289.1175 | : 0.01 |
| fragment_325.1425 | : 0.02 | fragment_306.1075 | : 0.01 | fragment_175.0725 | : 0.01 |
| fragment_279.1375 | : 0.02 | fragment_123.0775 | : 0.01 | fragment_237.0875 | : 0.01 |
| fragment_83.0475  | : 0.02 | fragment_211.1125 | : 0.01 | fragment_247.1075 | : 0.01 |
| fragment_291.1375 | : 0.02 | fragment_255.0975 | : 0.01 | fragment_201.0875 | : 0.01 |
| fragment_373.1775 | : 0.02 | fragment_290.1275 | : 0.01 | fragment_225.0875 | : 0.01 |
| fragment_263.1425 | : 0.02 | fragment_262.1325 | : 0.01 | fragment_137.0925 | : 0.01 |
| fragment_308.1375 | : 0.01 | fragment_223.1075 | : 0.01 | fragment_209.0925 | : 0.01 |
| fragment_265.1225 | : 0.01 | fragment_227.1025 | : 0.01 | fragment_267.1025 | : 0.01 |
| fragment_161.0575 | : 0.01 | fragment_280.1425 | : 0.01 | fragment_267.1325 | : 0.01 |
| fragment_297.1475 | : 0.01 | fragment_185.0925 | : 0.01 |                   |        |
| fragment_179.0675 | : 0.01 | fragment_281.1525 | : 0.01 |                   |        |
| fragment_213.0875 | : 0.01 | fragment_149.0925 | : 0.01 |                   |        |
| fragment_177.0525 | : 0.01 | fragment_255.1325 | : 0.01 |                   |        |
| fragment_343.1525 | : 0.01 | fragment_273.1175 | : 0.01 |                   |        |
| fragment_239.1075 | : 0.01 | fragment_326.1475 | : 0.01 |                   |        |

motif\_641

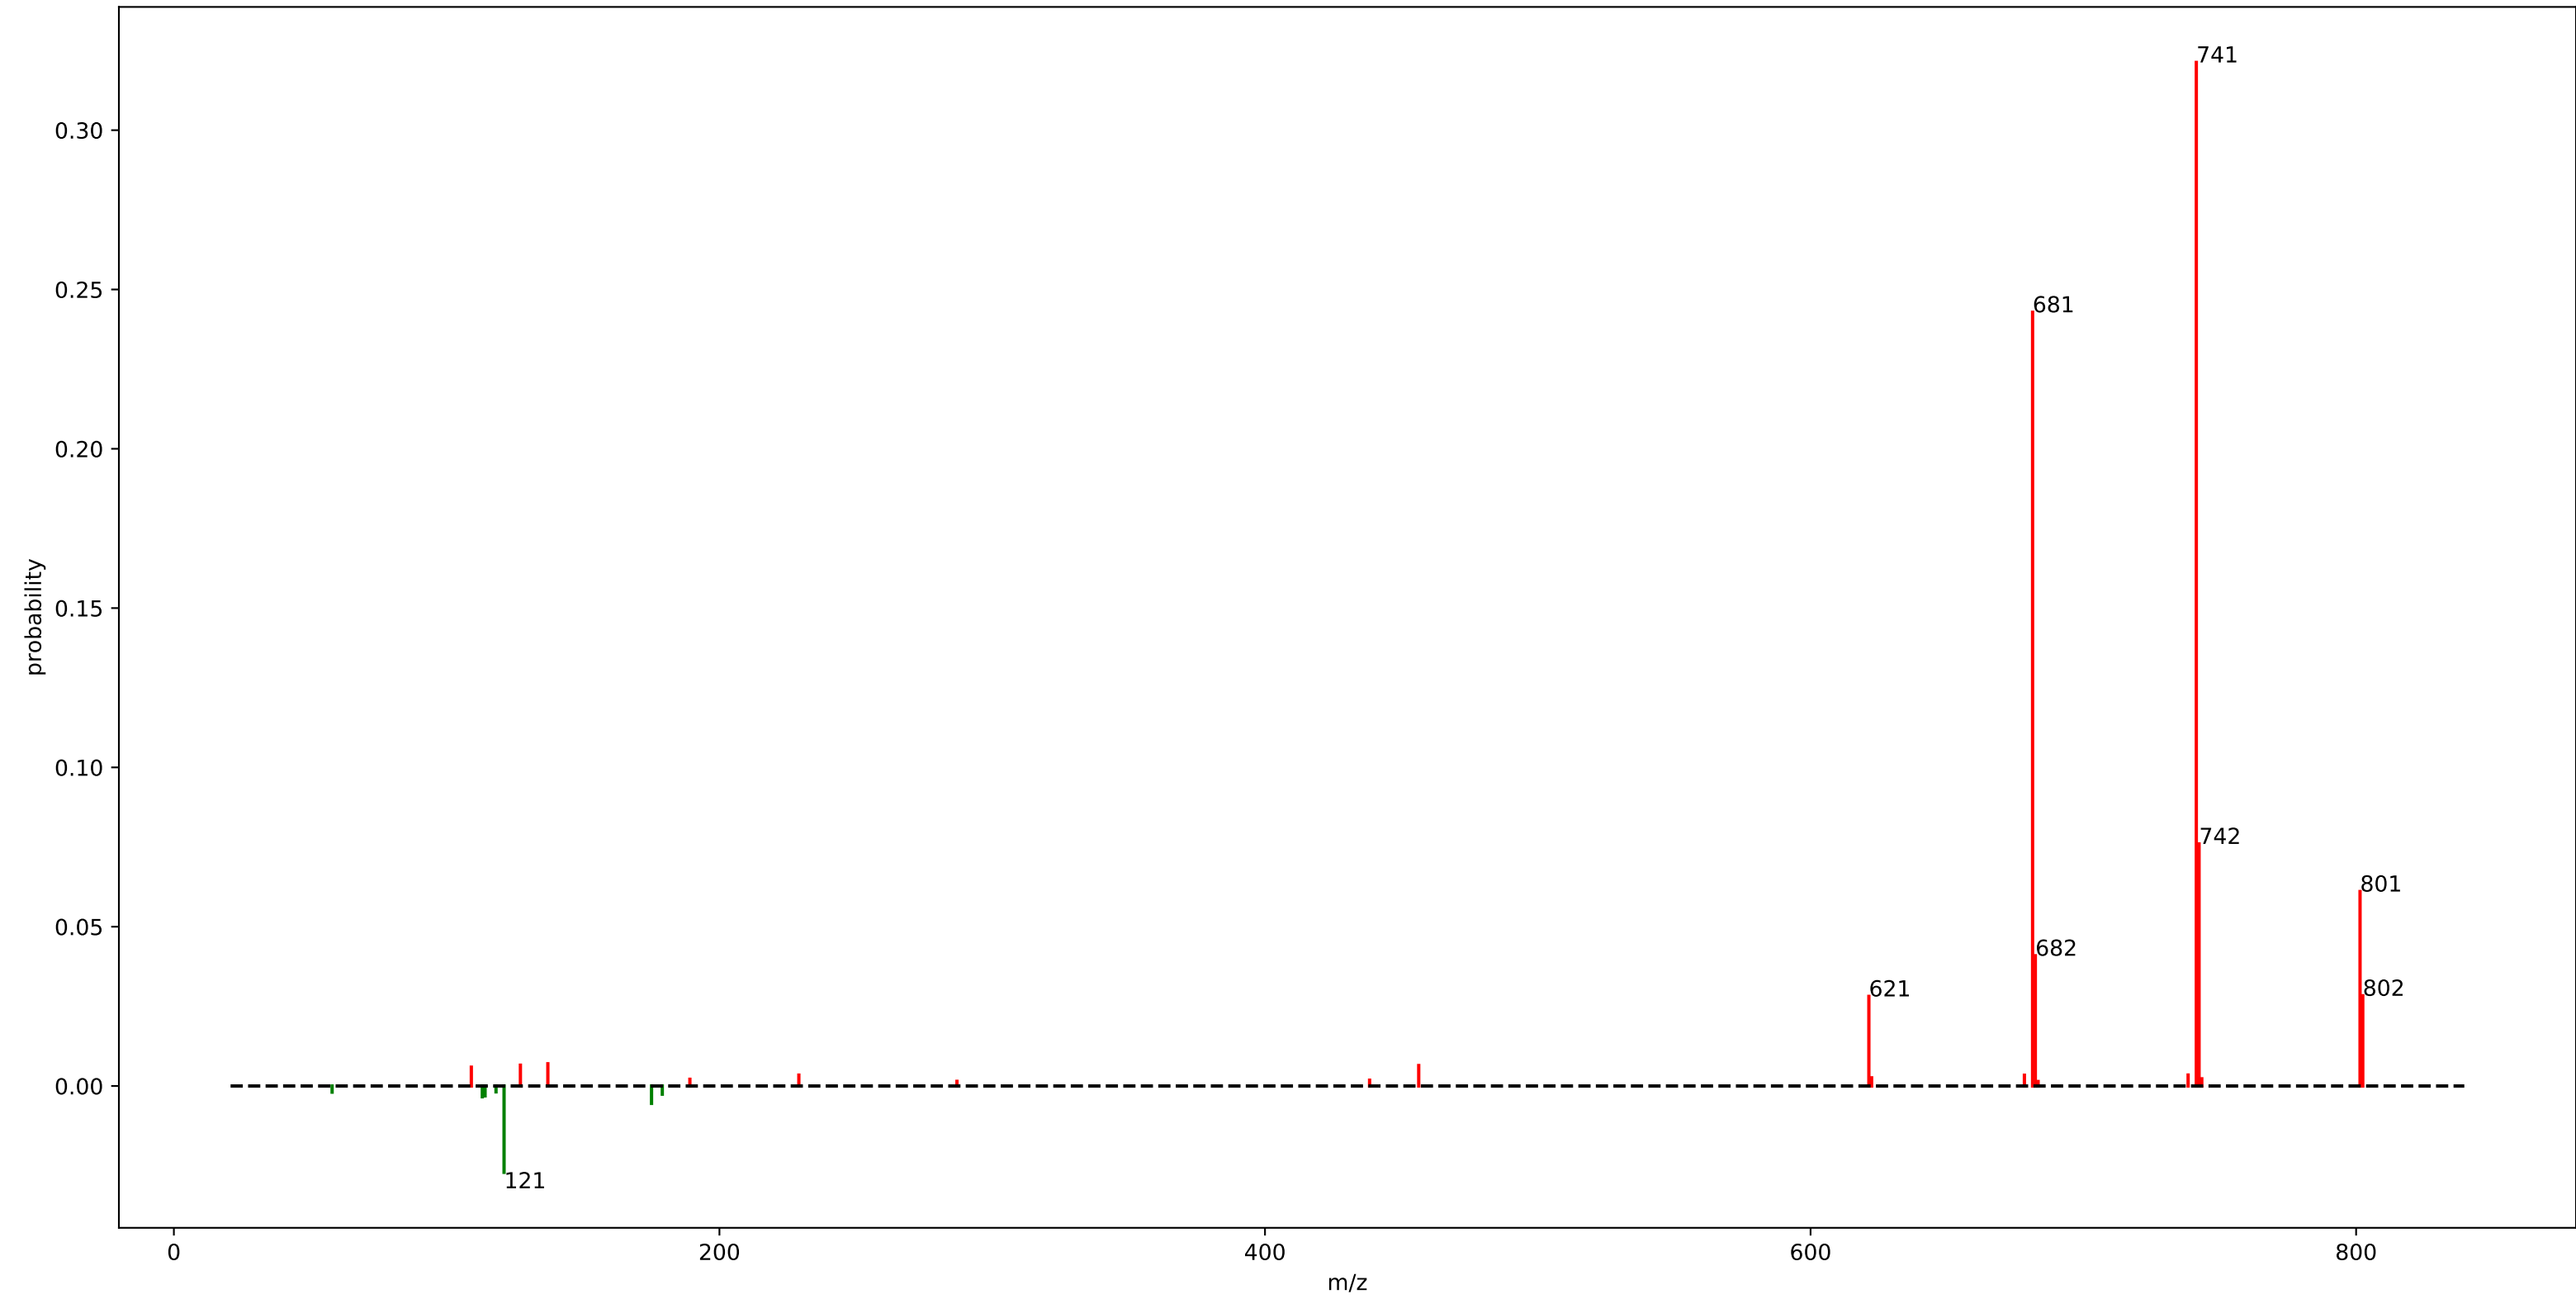

## motif\_641

|                   |        |
|-------------------|--------|
| fragment_741.4175 | : 0.32 |
| fragment_681.3975 | : 0.24 |
| fragment_742.4225 | : 0.08 |
| fragment_801.4425 | : 0.06 |
| fragment_682.4025 | : 0.04 |
| fragment_802.4425 | : 0.03 |
| fragment_621.3775 | : 0.03 |
| loss_121.0425     | : 0.03 |
| fragment_137.0975 | : 0.01 |
| fragment_127.0375 | : 0.01 |
| fragment_456.3575 | : 0.01 |
| fragment_109.0425 | : 0.01 |
| loss_175.1075     | : 0.01 |

motif\_640

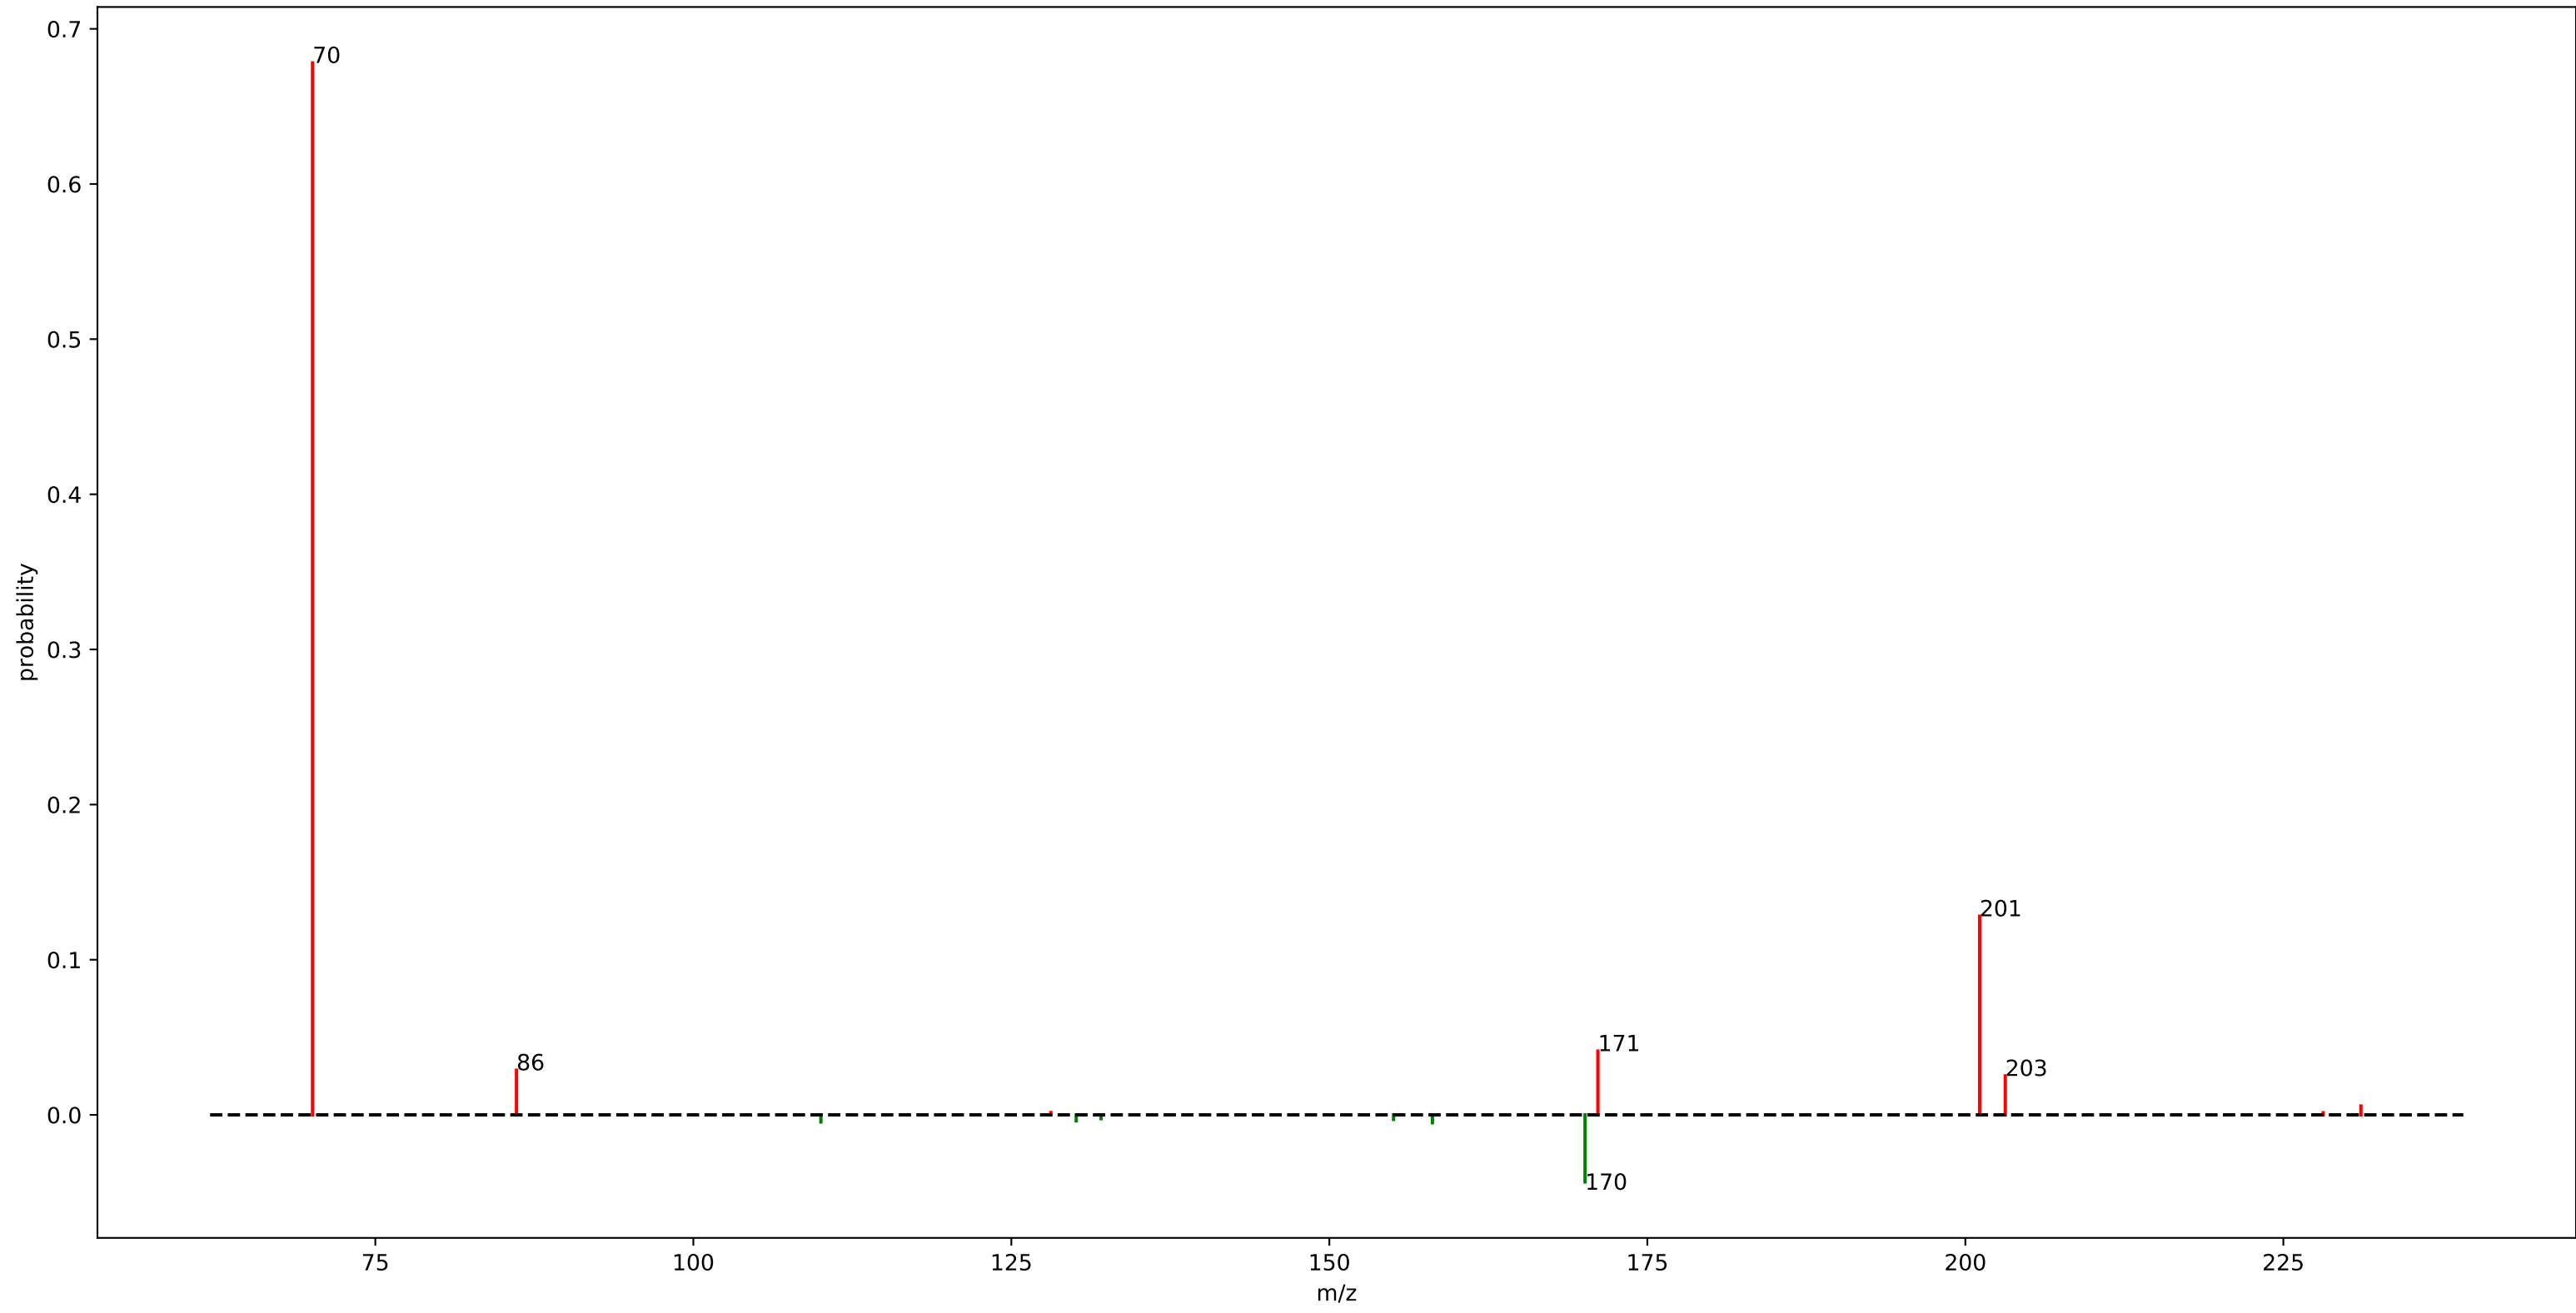

## motif\_640

|                   |        |
|-------------------|--------|
| fragment_70.0625  | : 0.68 |
| fragment_201.1225 | : 0.13 |
| loss_170.1025     | : 0.04 |
| fragment_171.1125 | : 0.04 |
| fragment_86.0975  | : 0.03 |
| fragment_203.1375 | : 0.03 |
| fragment_231.0975 | : 0.01 |
| loss_158.1025     | : 0.01 |



rhabdus\_motif\_84.m2m

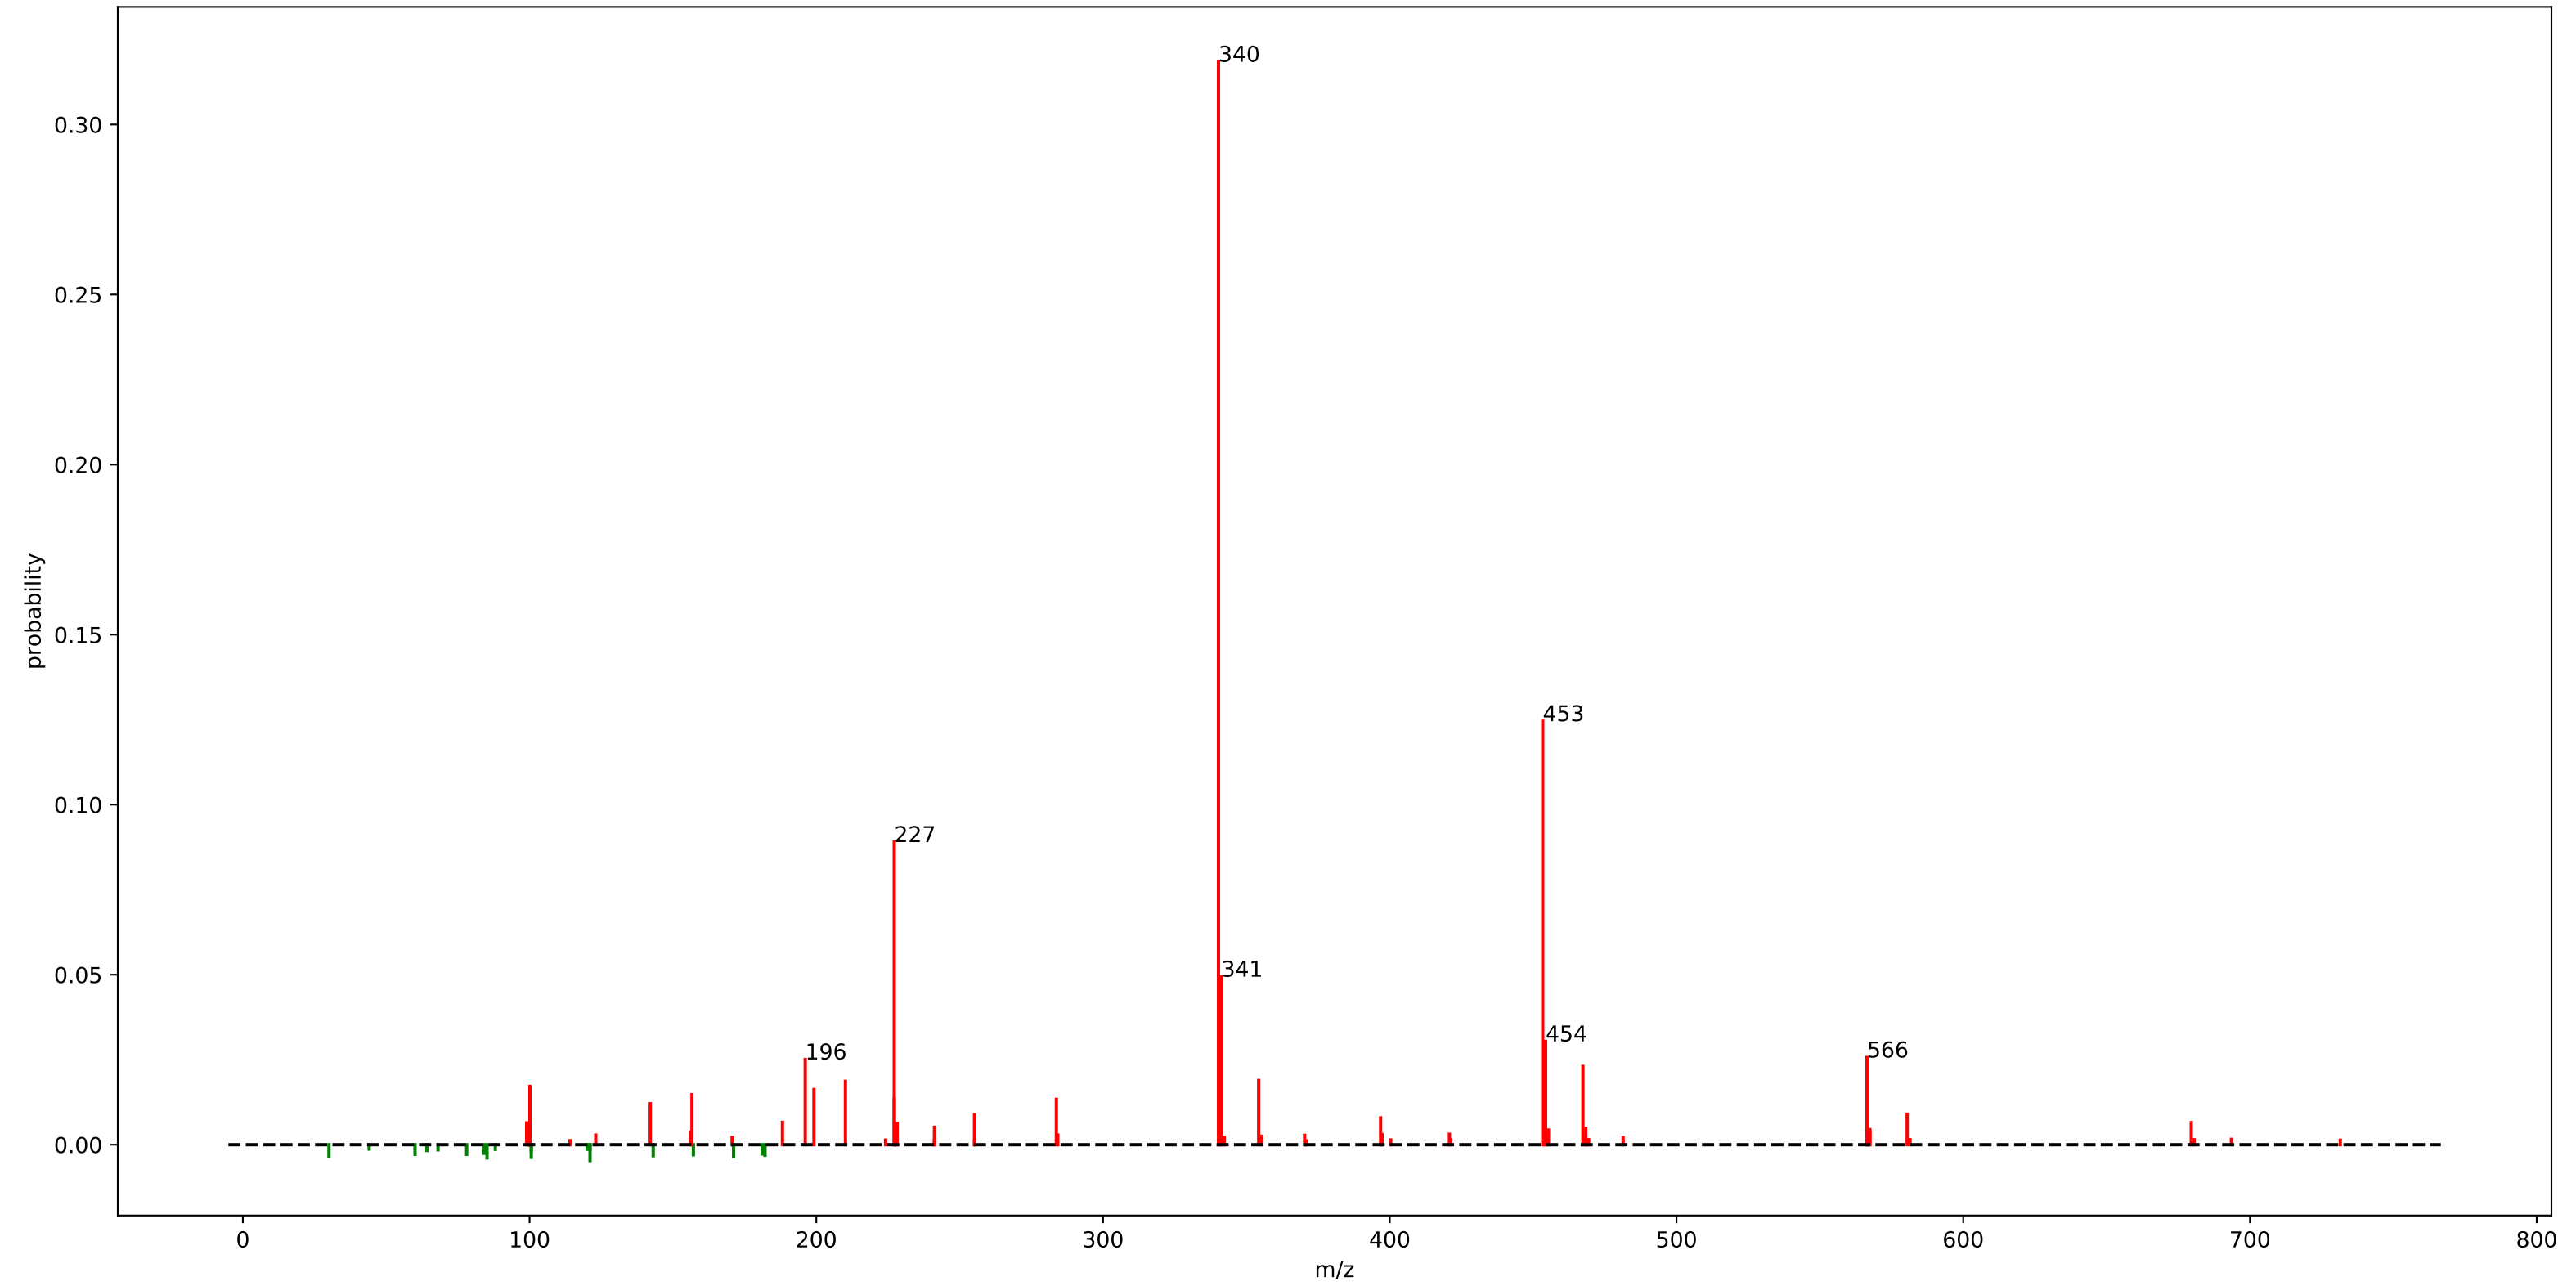

## rhabdus\_motif\_84.m2m

|                   |        |                   |        |
|-------------------|--------|-------------------|--------|
| fragment_340.2575 | : 0.32 | fragment_679.5125 | : 0.01 |
| fragment_453.3425 | : 0.12 | fragment_98.9825  | : 0.01 |
| fragment_227.1775 | : 0.09 | fragment_228.1775 | : 0.01 |
| fragment_341.2625 | : 0.05 | fragment_241.1925 | : 0.01 |
| fragment_454.3475 | : 0.03 |                   |        |
| fragment_566.4275 | : 0.03 |                   |        |
| fragment_196.1325 | : 0.03 |                   |        |
| fragment_467.3575 | : 0.02 |                   |        |
| fragment_354.2725 | : 0.02 |                   |        |
| fragment_210.1475 | : 0.02 |                   |        |
| fragment_100.1125 | : 0.02 |                   |        |
| fragment_199.1775 | : 0.02 |                   |        |
| fragment_156.6325 | : 0.01 |                   |        |
| fragment_227.1725 | : 0.01 |                   |        |
| fragment_283.7175 | : 0.01 |                   |        |
| fragment_142.0875 | : 0.01 |                   |        |
| fragment_580.4425 | : 0.01 |                   |        |
| fragment_255.1675 | : 0.01 |                   |        |
| fragment_396.8025 | : 0.01 |                   |        |
| fragment_188.1775 | : 0.01 |                   |        |

motif\_551

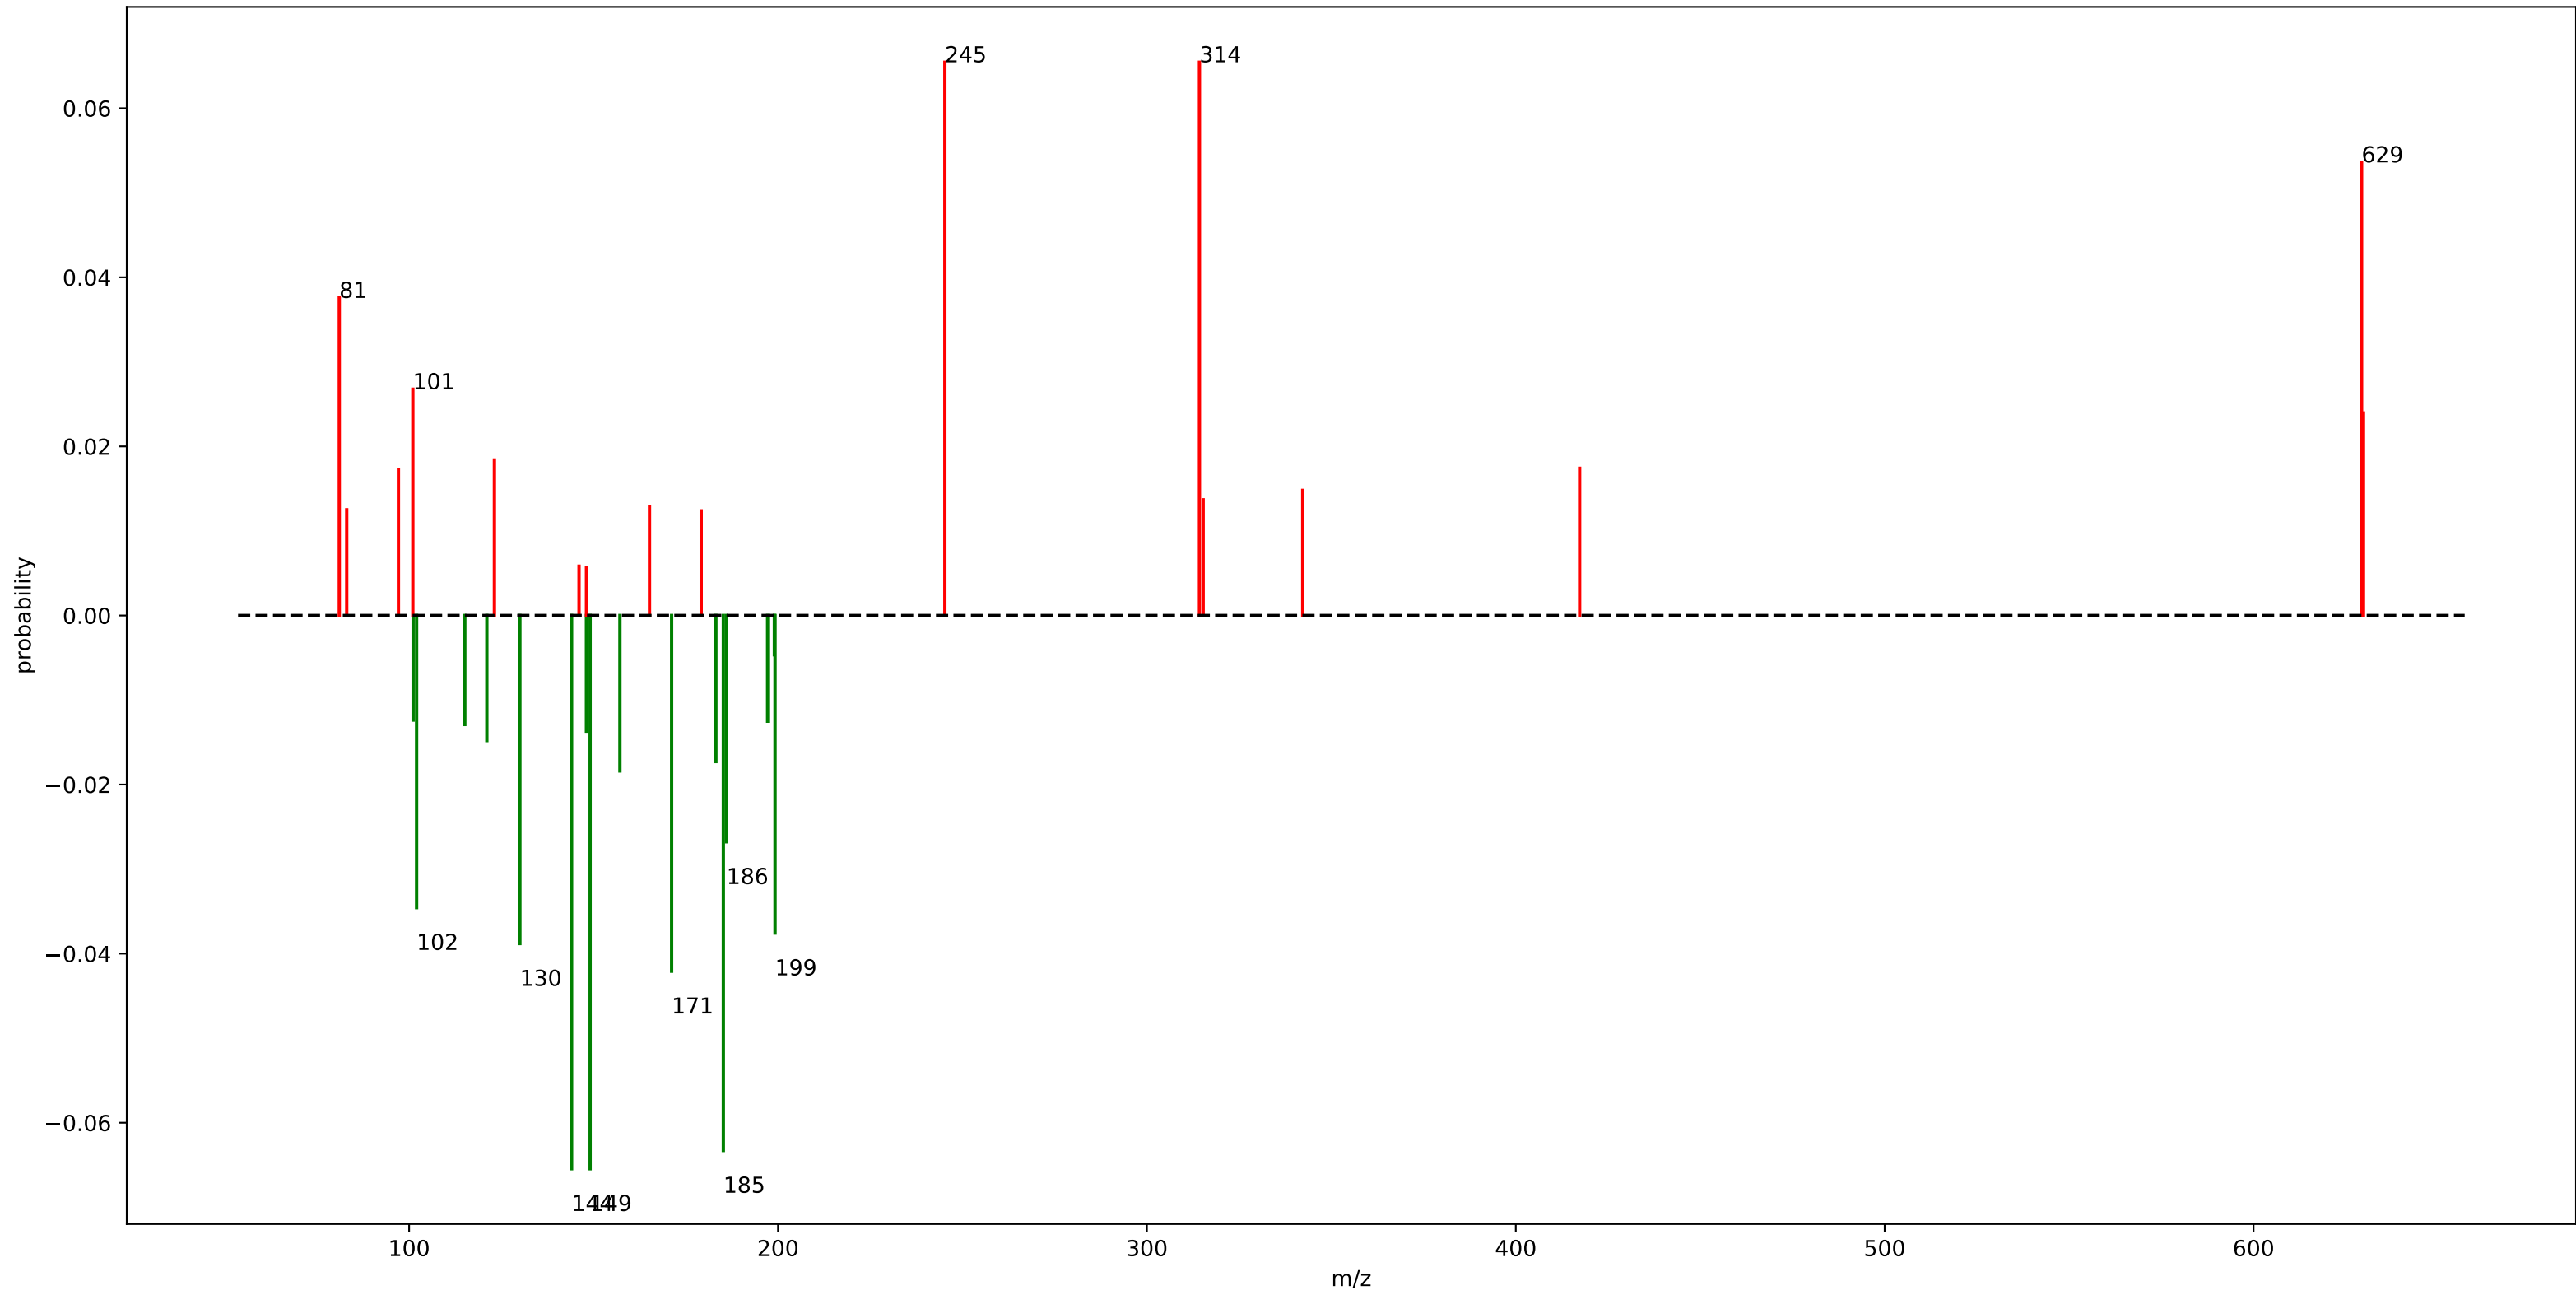

## motif\_551

|                   |        |                   |        |
|-------------------|--------|-------------------|--------|
| loss_149.0675     | : 0.07 | fragment_342.2425 | : 0.01 |
| fragment_314.2475 | : 0.07 | loss_148.0625     | : 0.01 |
| fragment_245.2275 | : 0.07 | fragment_315.2525 | : 0.01 |
| loss_144.0425     | : 0.07 | loss_115.0975     | : 0.01 |
| loss_185.1775     | : 0.06 | fragment_165.1625 | : 0.01 |
| fragment_629.2875 | : 0.05 | loss_197.1775     | : 0.01 |
| loss_171.1575     | : 0.04 | fragment_83.0825  | : 0.01 |
| loss_130.0275     | : 0.04 | loss_101.0825     | : 0.01 |
| loss_199.1925     | : 0.04 | fragment_179.1775 | : 0.01 |
| fragment_81.0675  | : 0.04 | fragment_146.0575 | : 0.01 |
| loss_102.0275     | : 0.03 | fragment_148.0725 | : 0.01 |
| loss_186.0525     | : 0.03 |                   |        |
| fragment_101.0075 | : 0.03 |                   |        |
| fragment_629.7925 | : 0.02 |                   |        |
| loss_157.1425     | : 0.02 |                   |        |
| fragment_123.1175 | : 0.02 |                   |        |
| fragment_417.3125 | : 0.02 |                   |        |
| loss_183.1575     | : 0.02 |                   |        |
| fragment_97.1025  | : 0.02 |                   |        |
| loss_121.0725     | : 0.01 |                   |        |

motif\_550

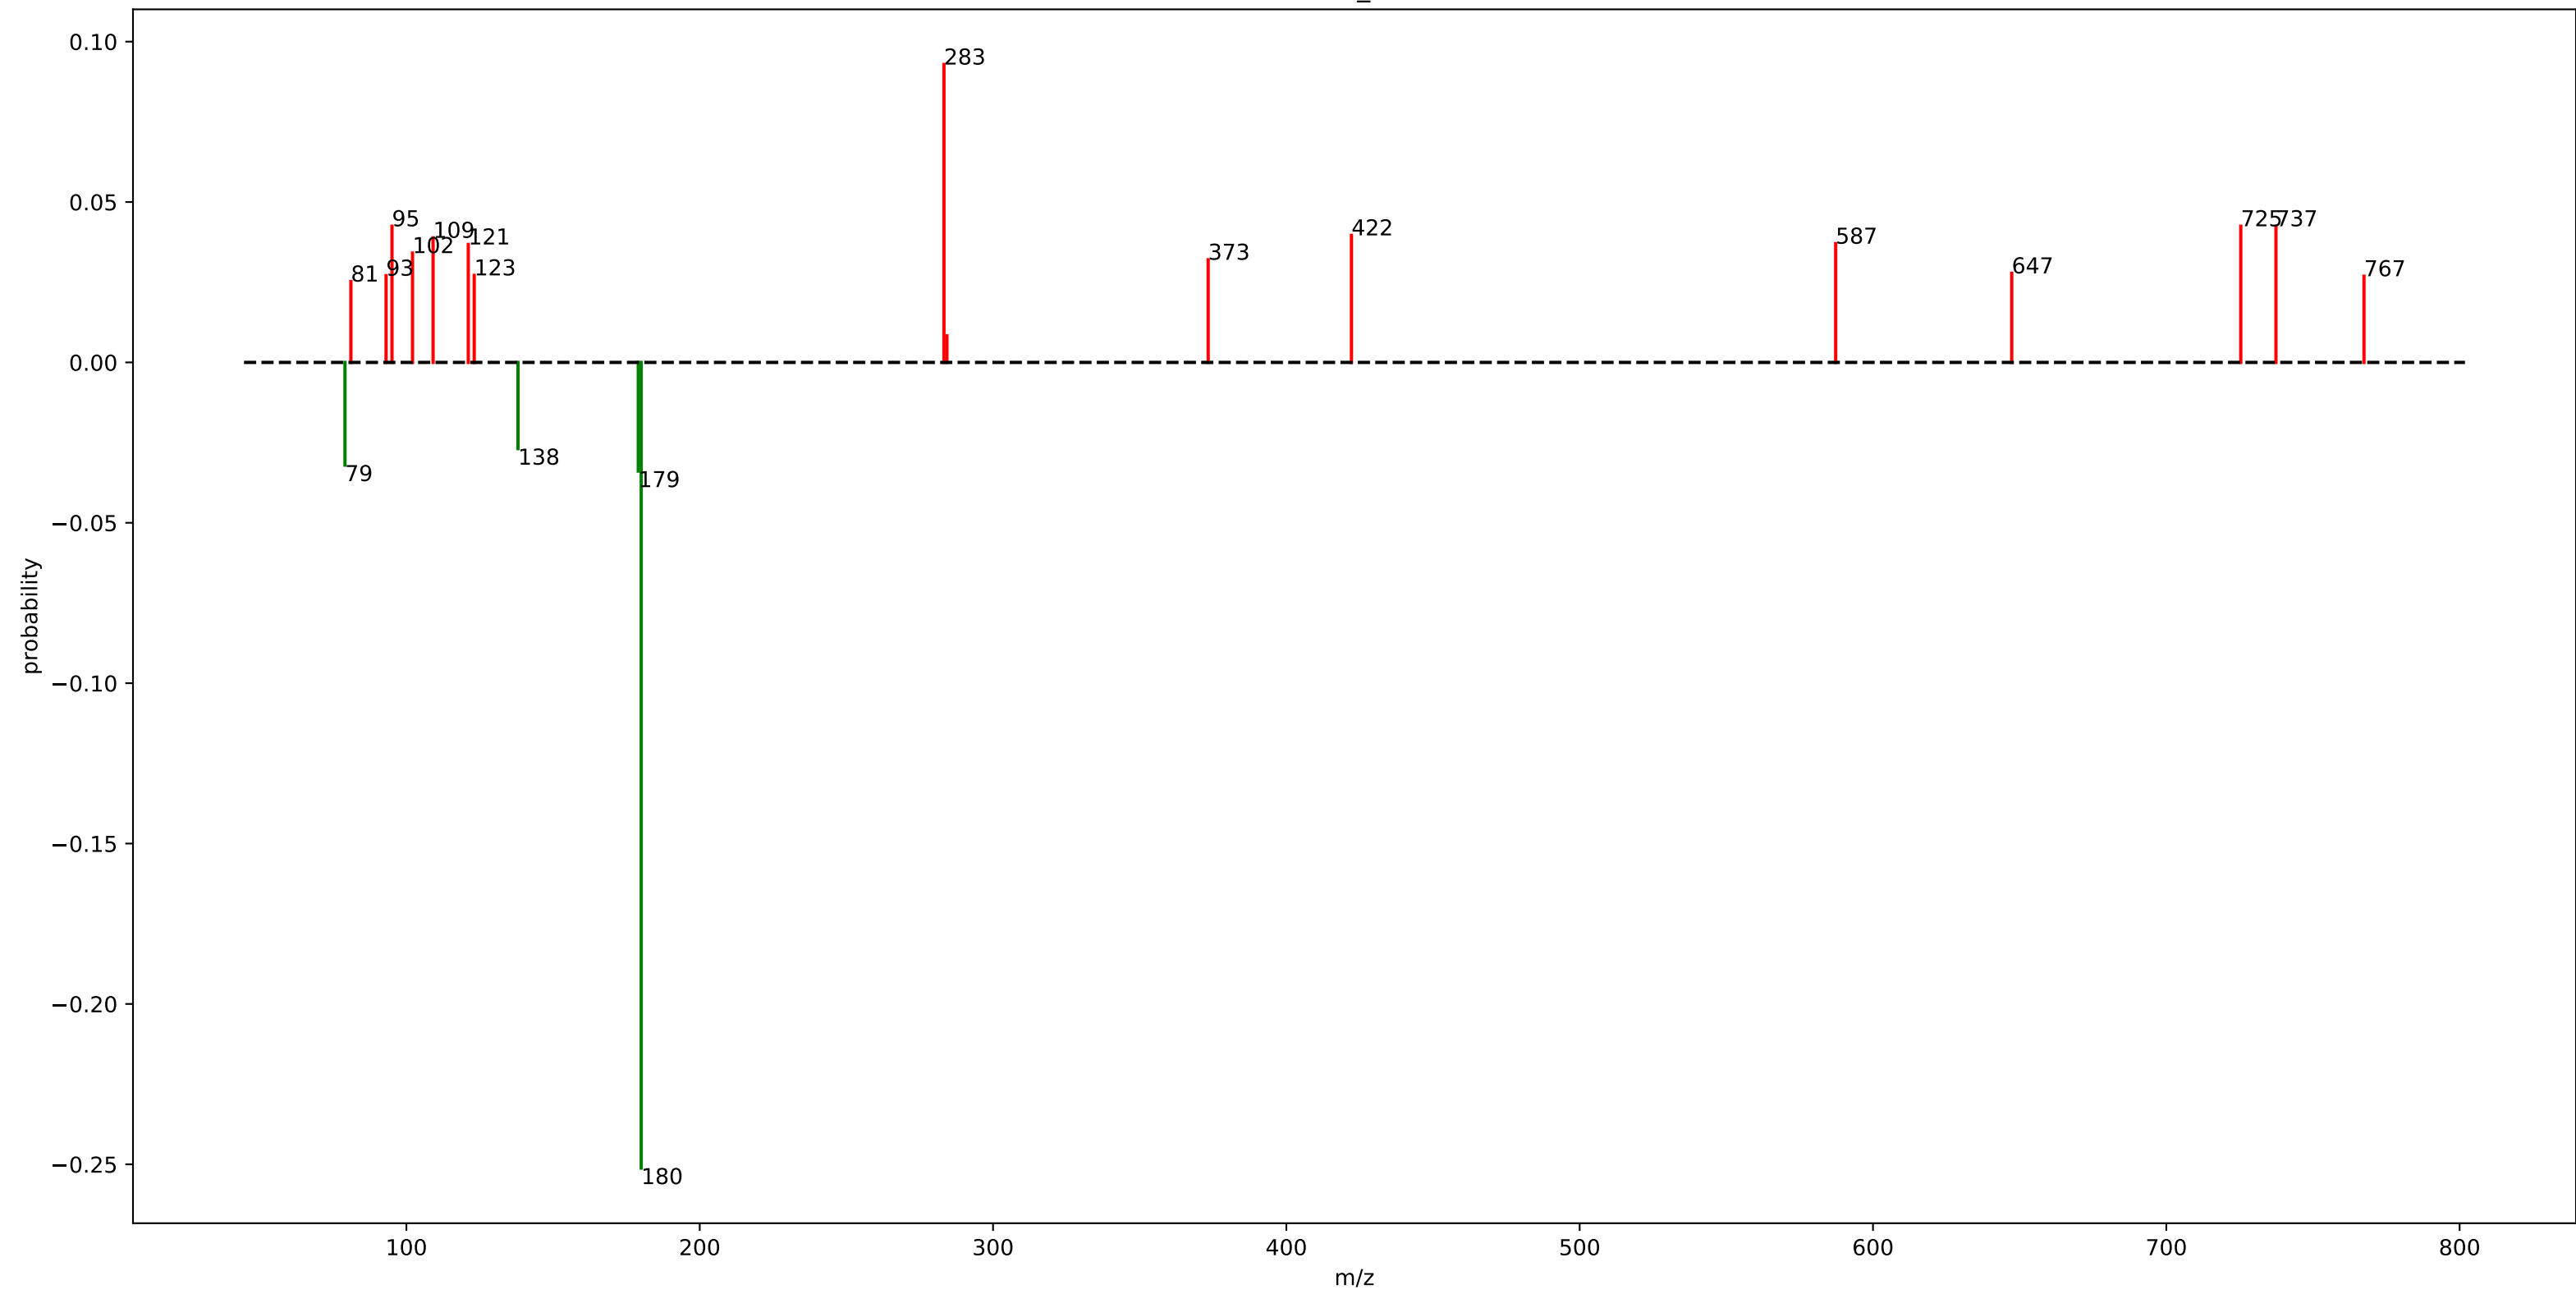

## motif\_550

|                   |        |
|-------------------|--------|
| loss_180.0575     | : 0.25 |
| fragment_283.2625 | : 0.09 |
| fragment_95.0825  | : 0.04 |
| fragment_725.3875 | : 0.04 |
| fragment_737.3875 | : 0.04 |
| fragment_422.1925 | : 0.04 |
| fragment_109.0975 | : 0.04 |
| fragment_587.2825 | : 0.04 |
| fragment_121.1025 | : 0.04 |
| fragment_102.0925 | : 0.03 |
| loss_179.0575     | : 0.03 |
| loss_79.0625      | : 0.03 |
| fragment_373.3475 | : 0.03 |
| fragment_647.3025 | : 0.03 |
| fragment_123.1175 | : 0.03 |
| fragment_93.0725  | : 0.03 |
| fragment_767.3975 | : 0.03 |
| loss_138.0475     | : 0.03 |
| fragment_81.0725  | : 0.03 |
| fragment_284.2675 | : 0.01 |

urine\_mass2motif\_187.m2m

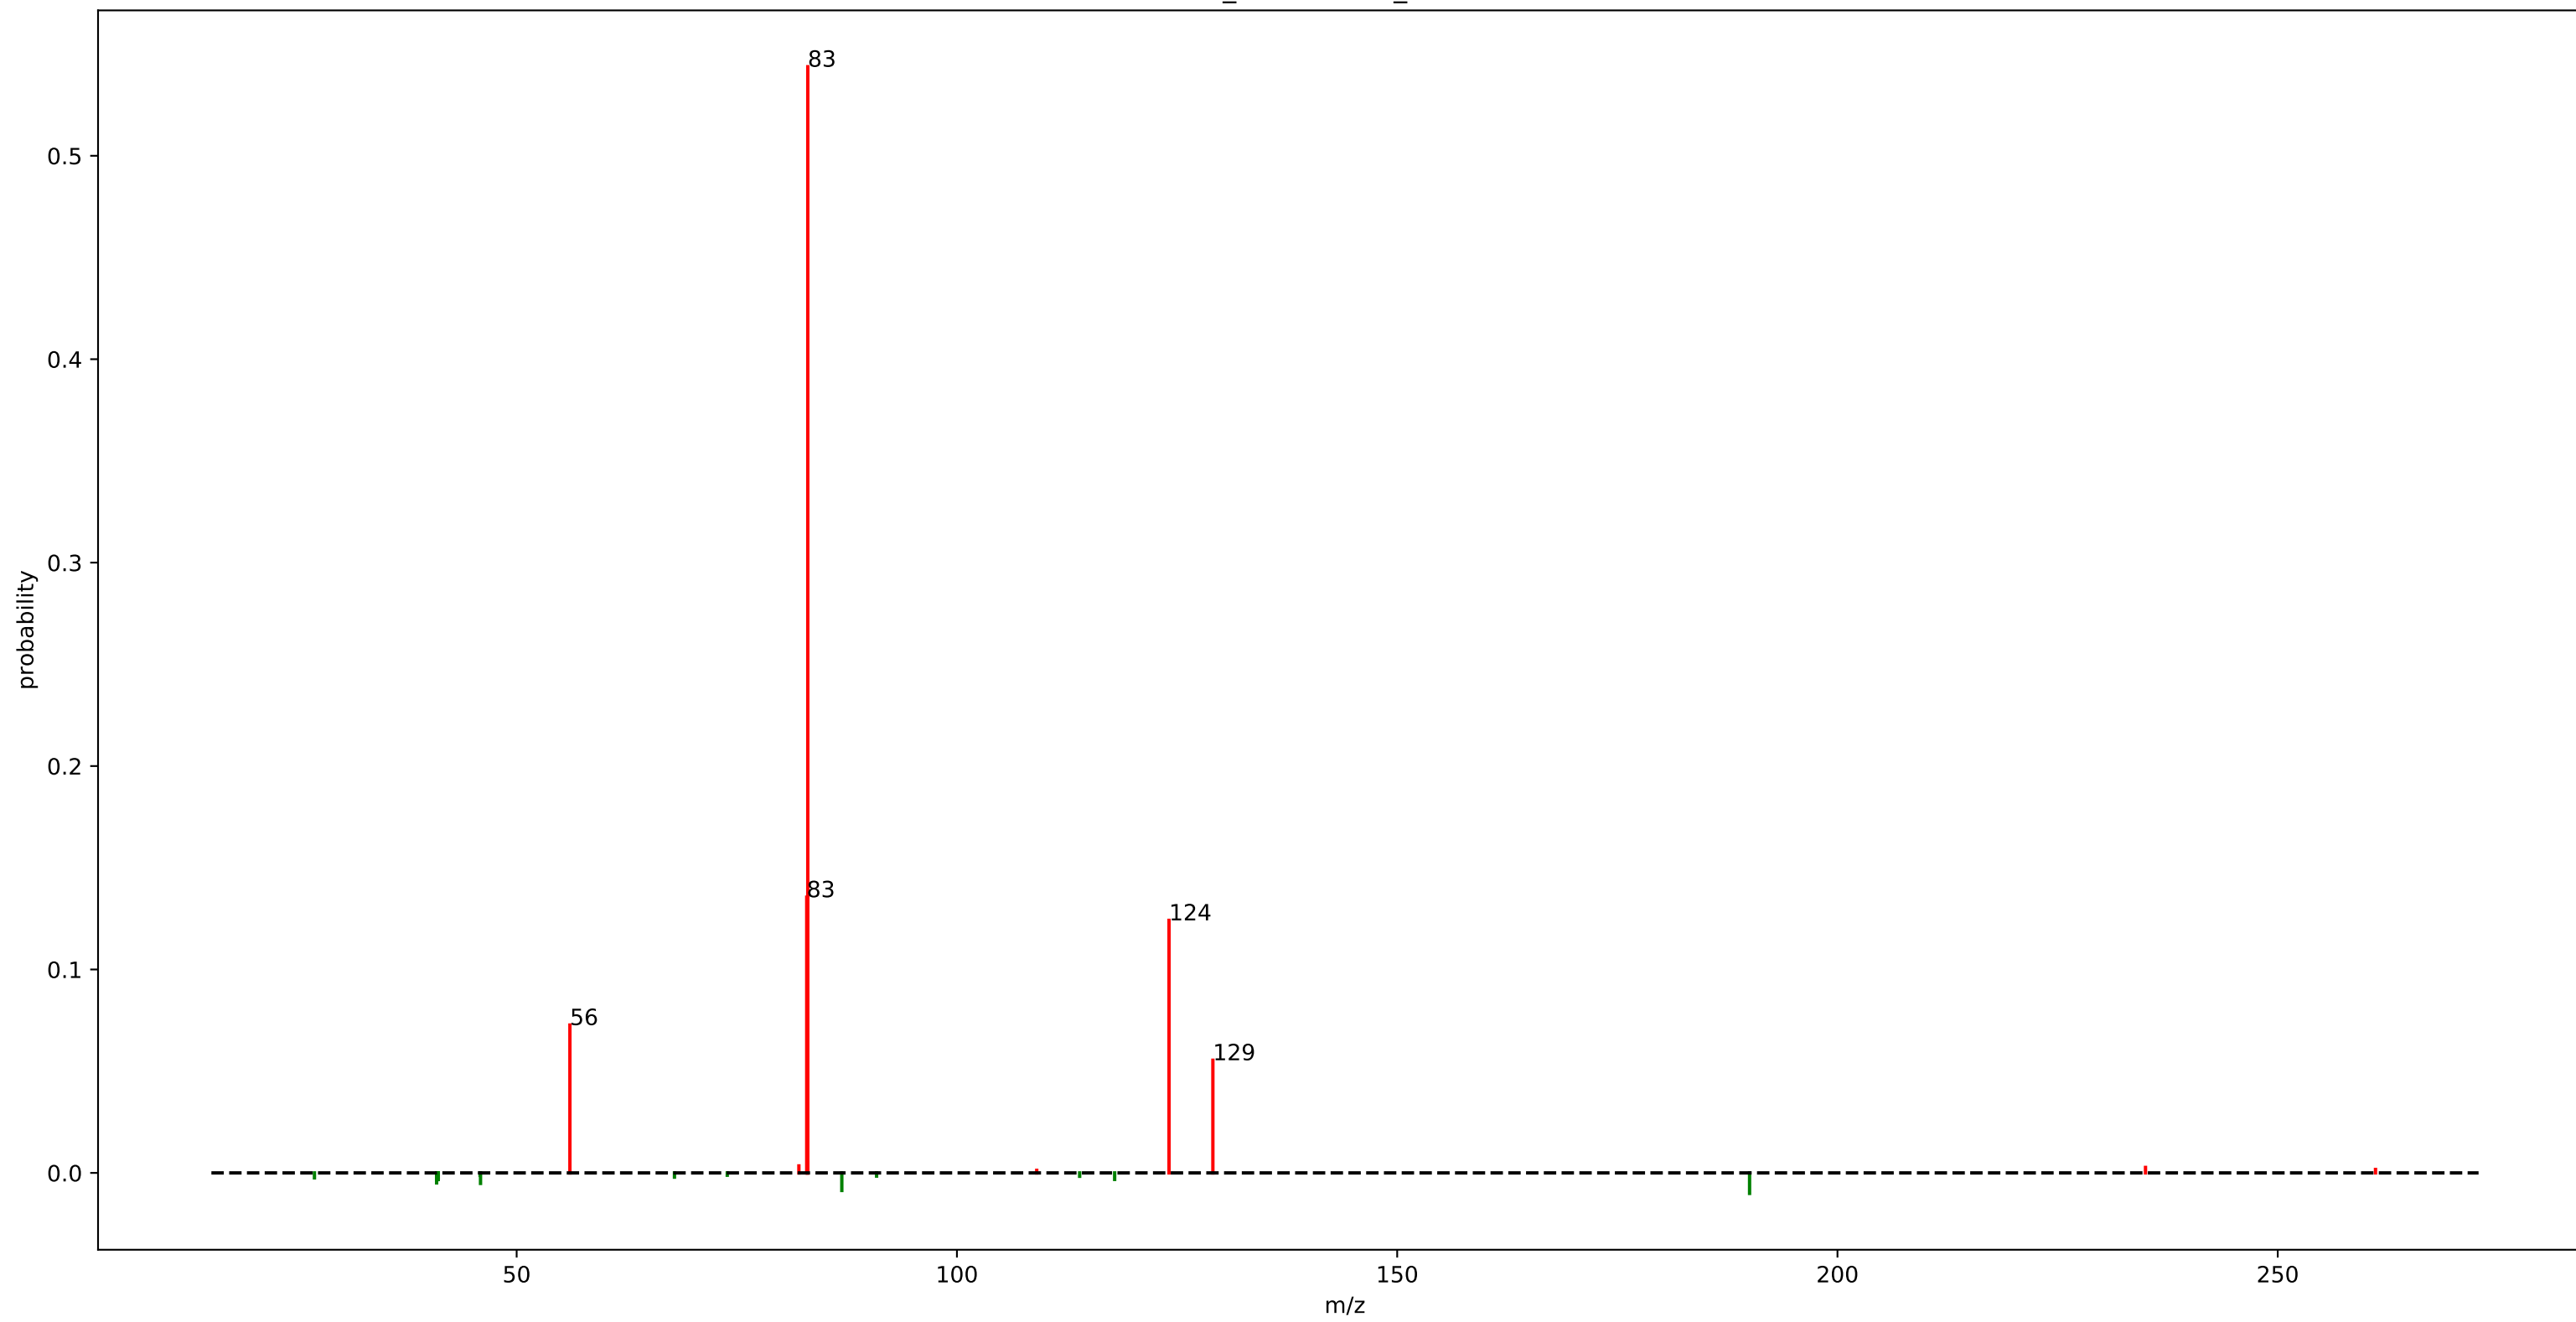

## urine\_mass2motif\_187.m2m

|                   |        |
|-------------------|--------|
| fragment_83.0625  | : 0.54 |
| fragment_82.9425  | : 0.14 |
| fragment_124.0875 | : 0.12 |
| fragment_56.0475  | : 0.07 |
| fragment_129.0675 | : 0.06 |
| loss_190.0175     | : 0.01 |
| loss_86.9275      | : 0.01 |
| fragment_83.0225  | : 0.01 |
| loss_45.8975      | : 0.01 |



motif\_637

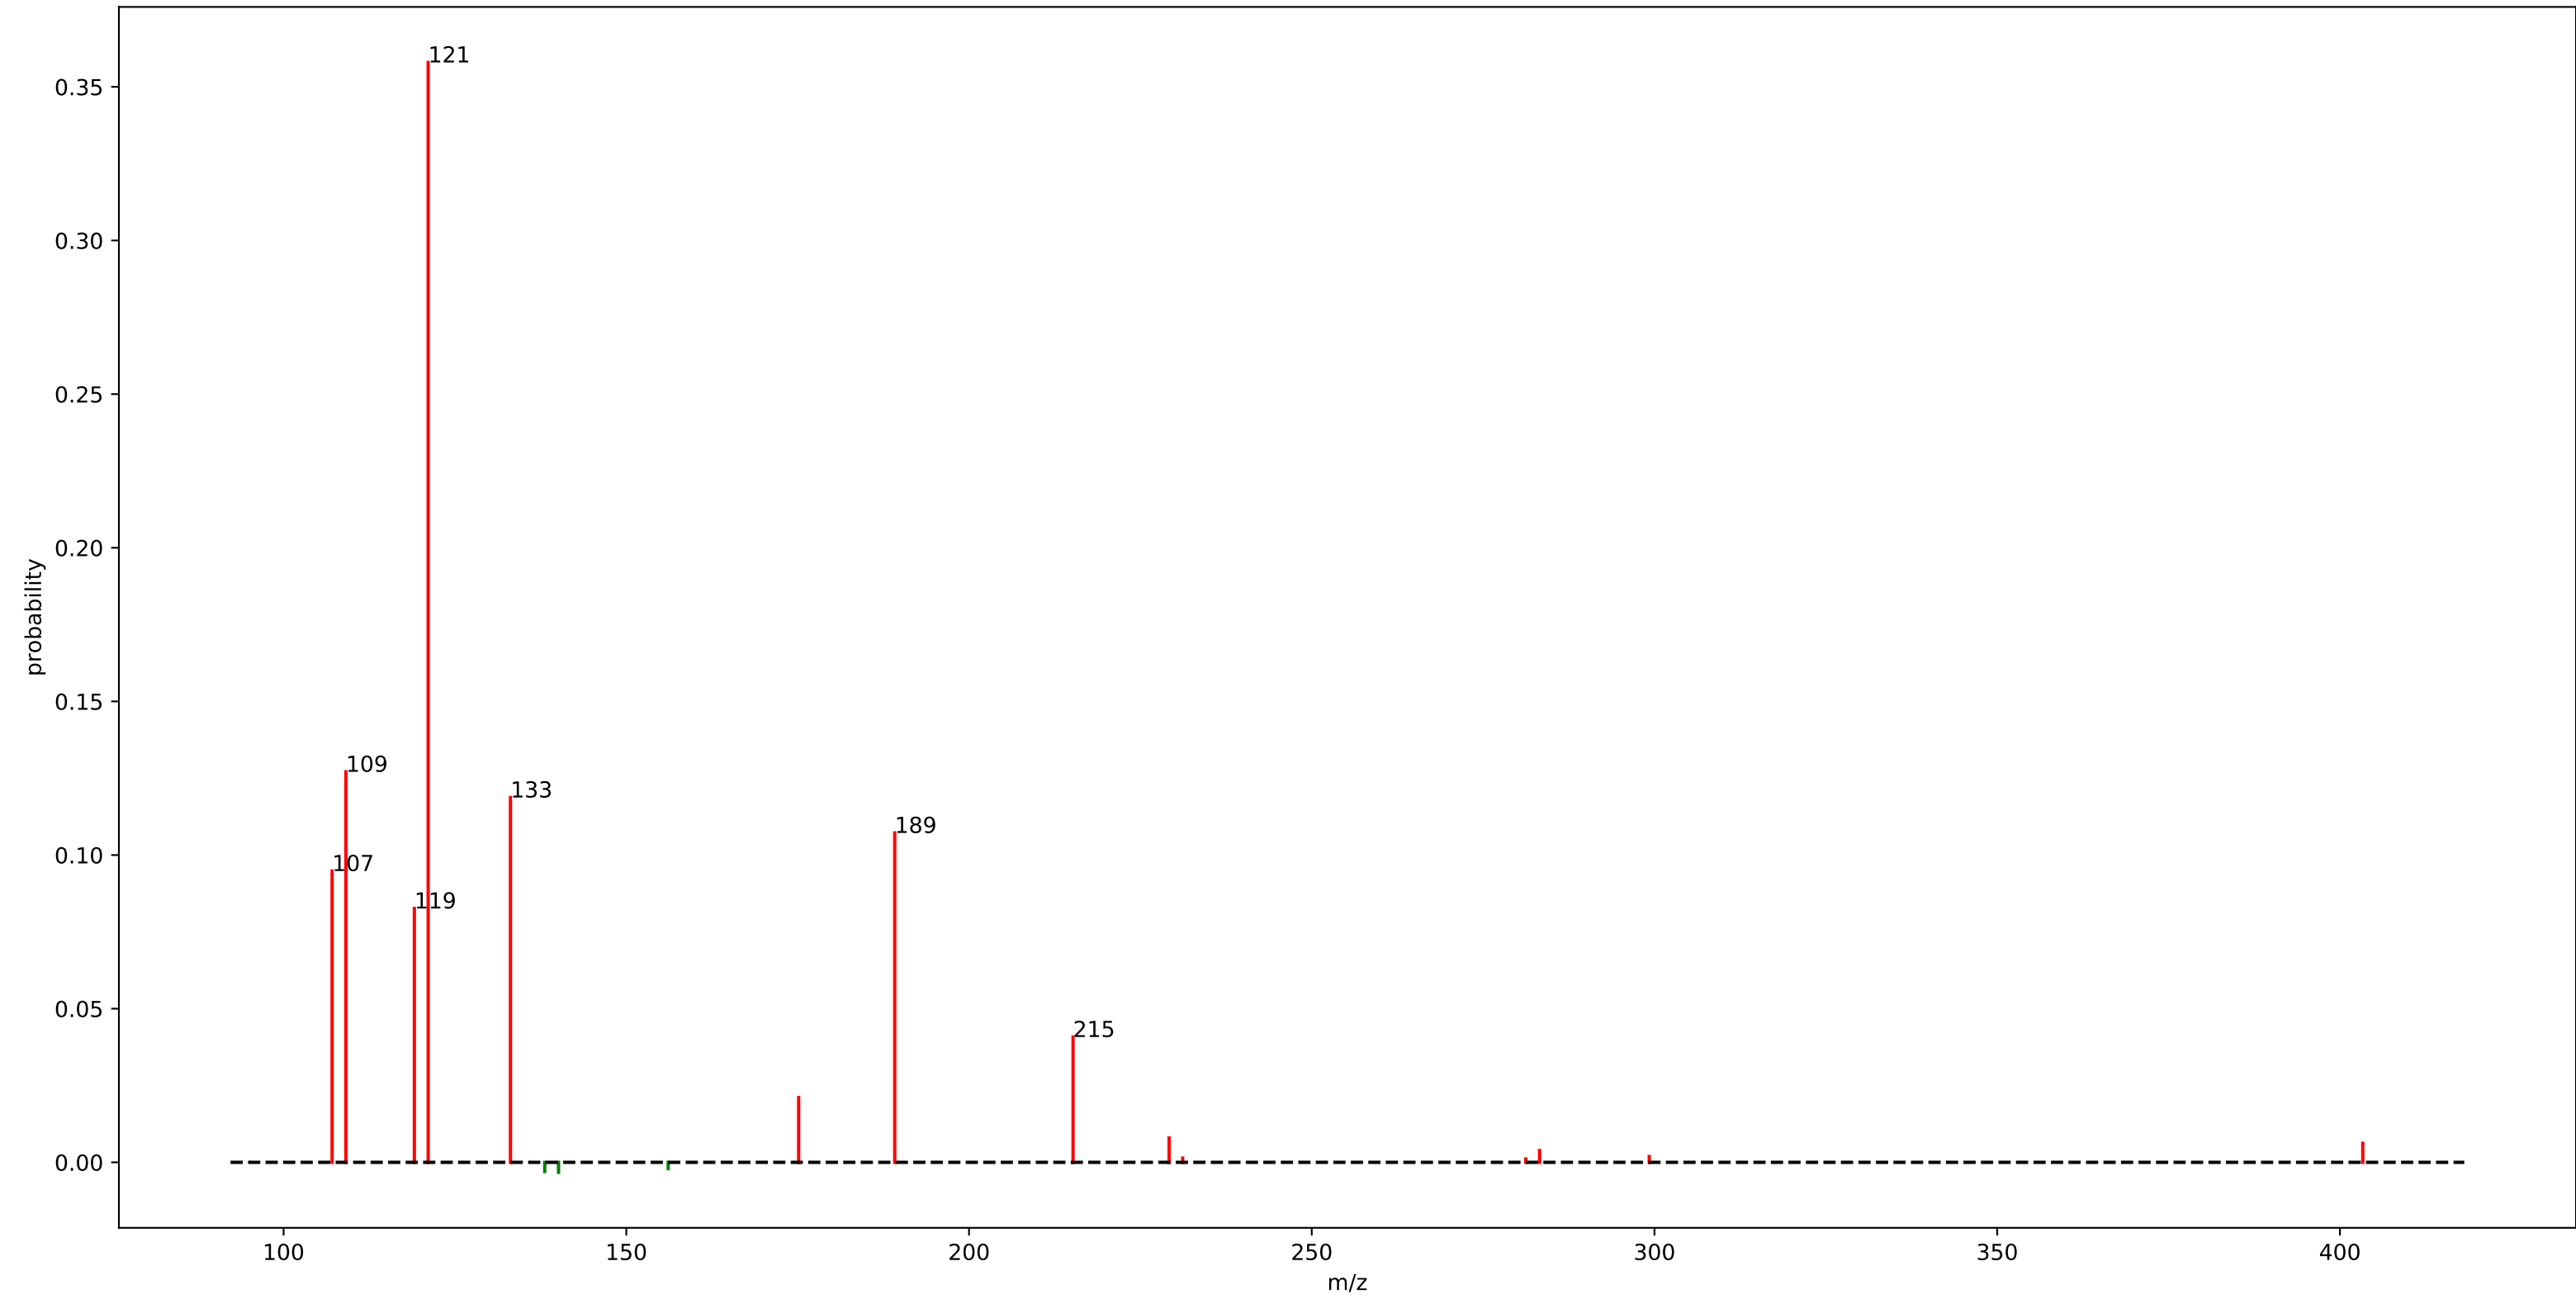

## motif\_637

|                   |        |
|-------------------|--------|
| fragment_121.0975 | : 0.36 |
| fragment_109.0975 | : 0.13 |
| fragment_133.1025 | : 0.12 |
| fragment_189.1625 | : 0.11 |
| fragment_107.0825 | : 0.09 |
| fragment_119.0825 | : 0.08 |
| fragment_215.1775 | : 0.04 |
| fragment_175.1475 | : 0.02 |
| fragment_229.1925 | : 0.01 |
| fragment_403.3325 | : 0.01 |

motif\_511

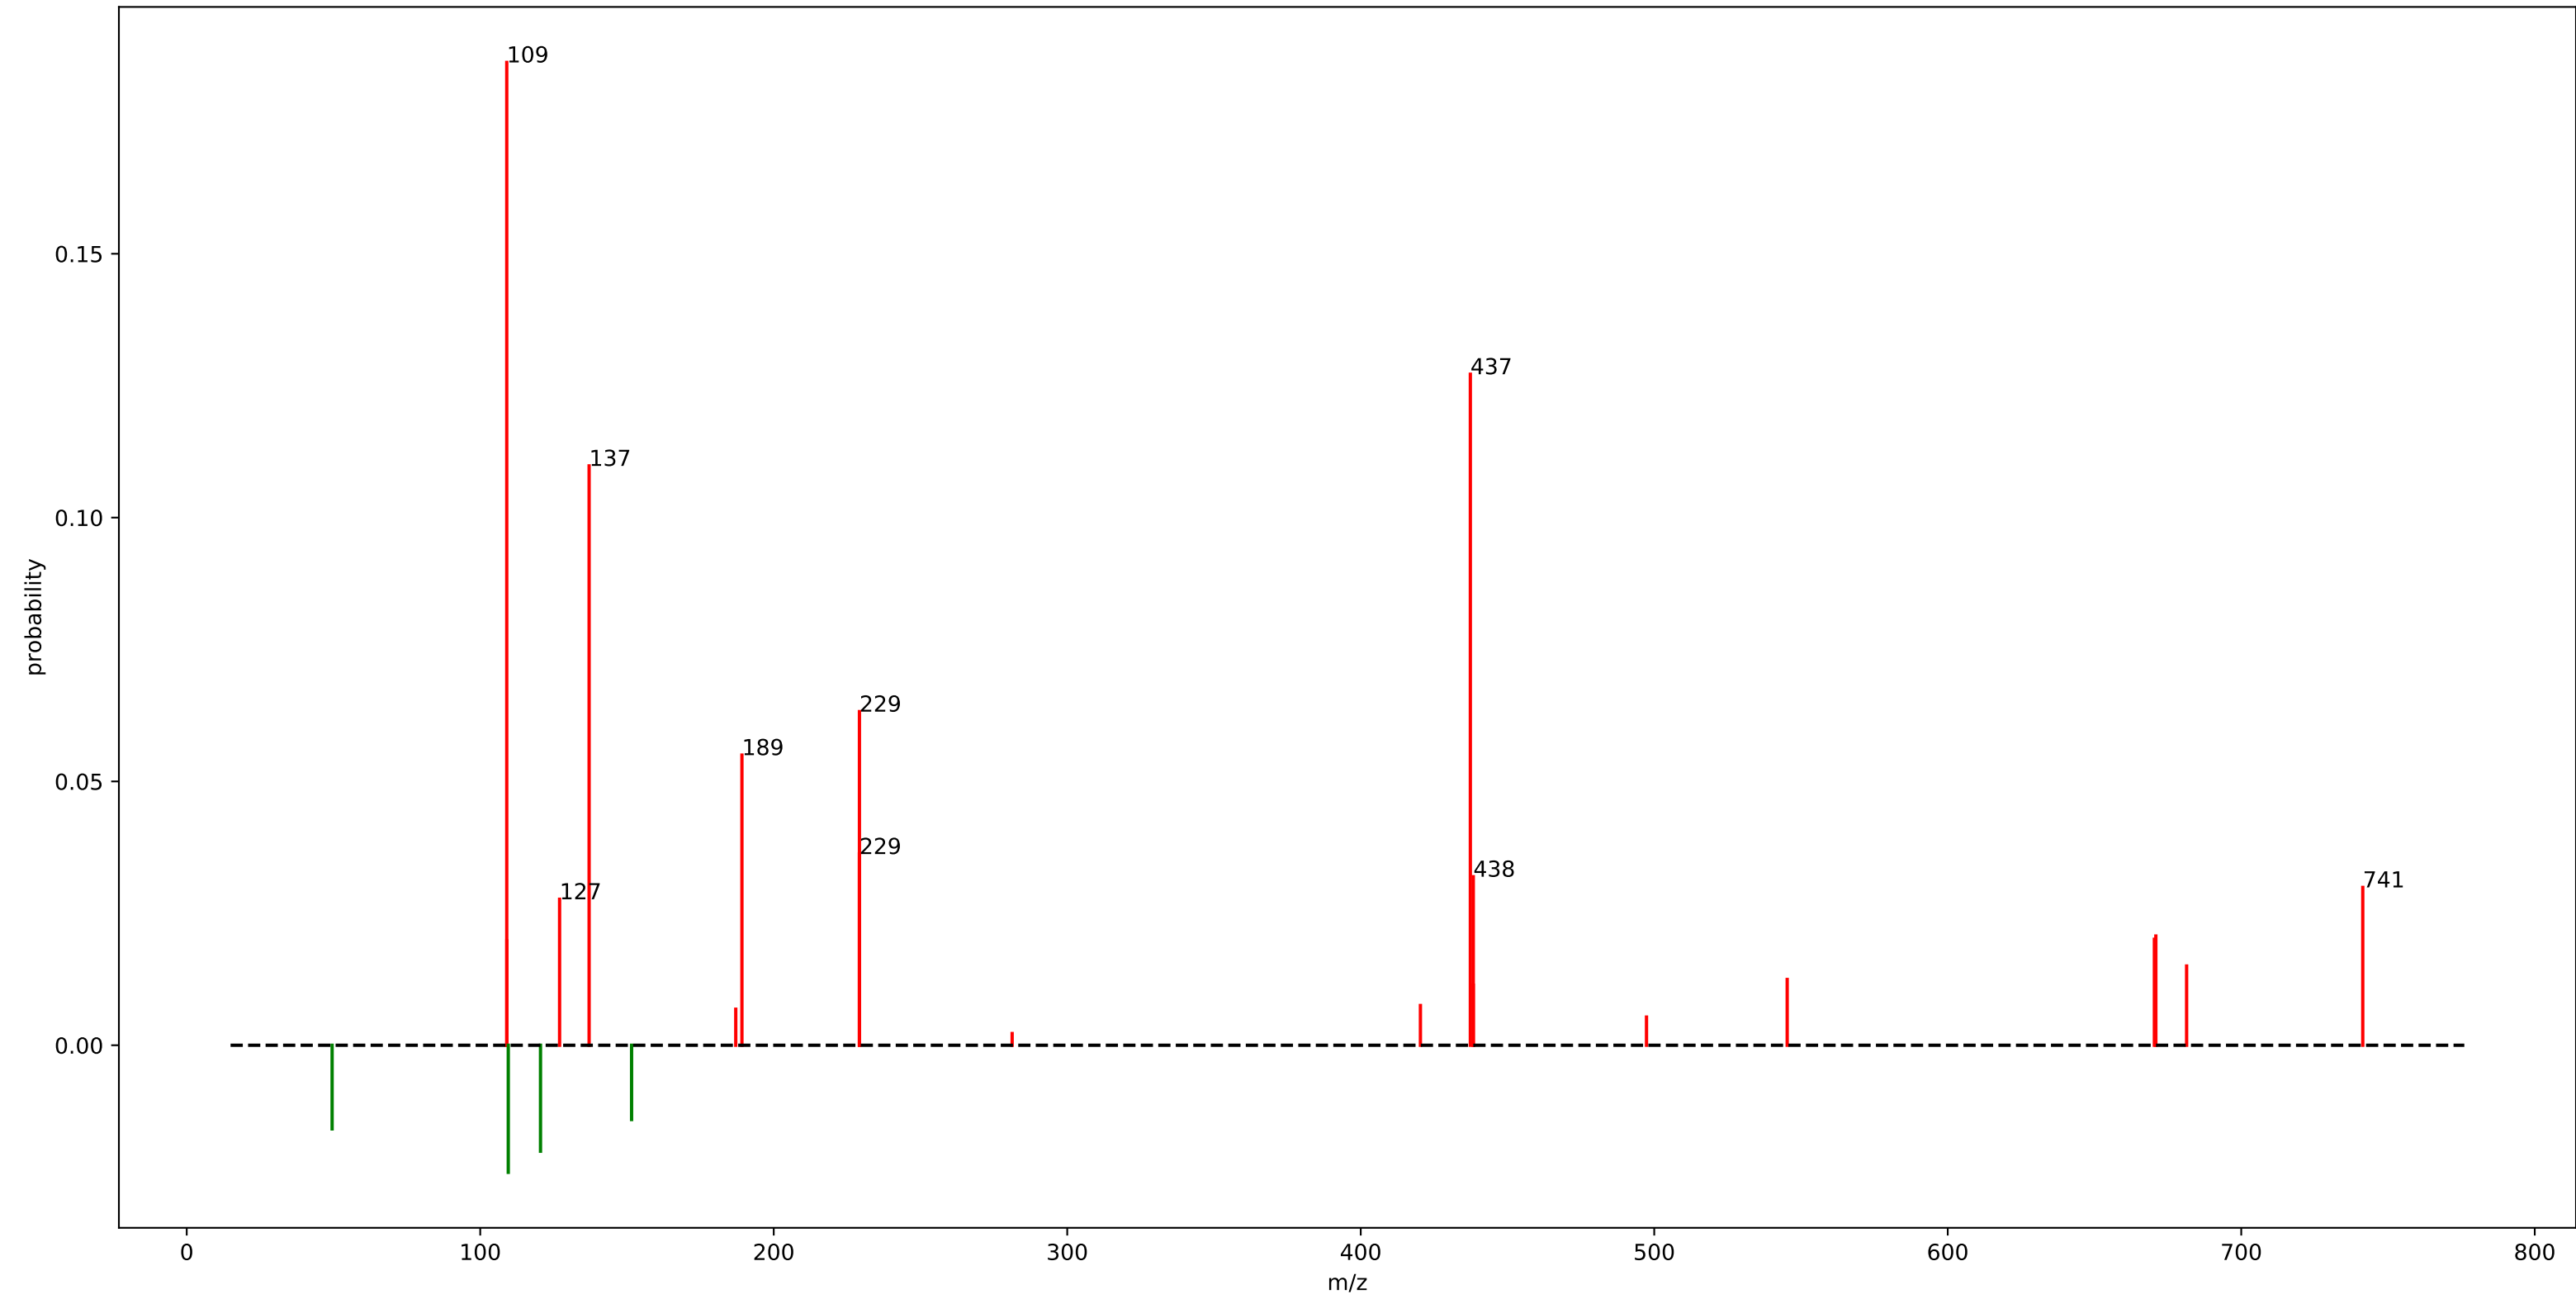

## motif\_511

|                   |        |                   |        |
|-------------------|--------|-------------------|--------|
| fragment_109.0375 | : 0.19 | fragment_187.0625 | : 0.01 |
| fragment_437.3425 | : 0.13 | fragment_497.3625 | : 0.01 |
| fragment_137.0975 | : 0.11 |                   |        |
| fragment_229.1975 | : 0.06 |                   |        |
| fragment_189.1625 | : 0.05 |                   |        |
| fragment_229.1875 | : 0.04 |                   |        |
| fragment_438.3475 | : 0.03 |                   |        |
| fragment_741.4075 | : 0.03 |                   |        |
| fragment_127.0375 | : 0.03 |                   |        |
| loss_109.5525     | : 0.02 |                   |        |
| fragment_670.9025 | : 0.02 |                   |        |
| fragment_670.4025 | : 0.02 |                   |        |
| loss_120.5375     | : 0.02 |                   |        |
| fragment_109.0725 | : 0.02 |                   |        |
| loss_49.5325      | : 0.02 |                   |        |
| fragment_681.3875 | : 0.02 |                   |        |
| loss_151.5675     | : 0.01 |                   |        |
| fragment_545.2975 | : 0.01 |                   |        |
| fragment_438.3425 | : 0.01 |                   |        |
| fragment_420.3325 | : 0.01 |                   |        |

motif\_635

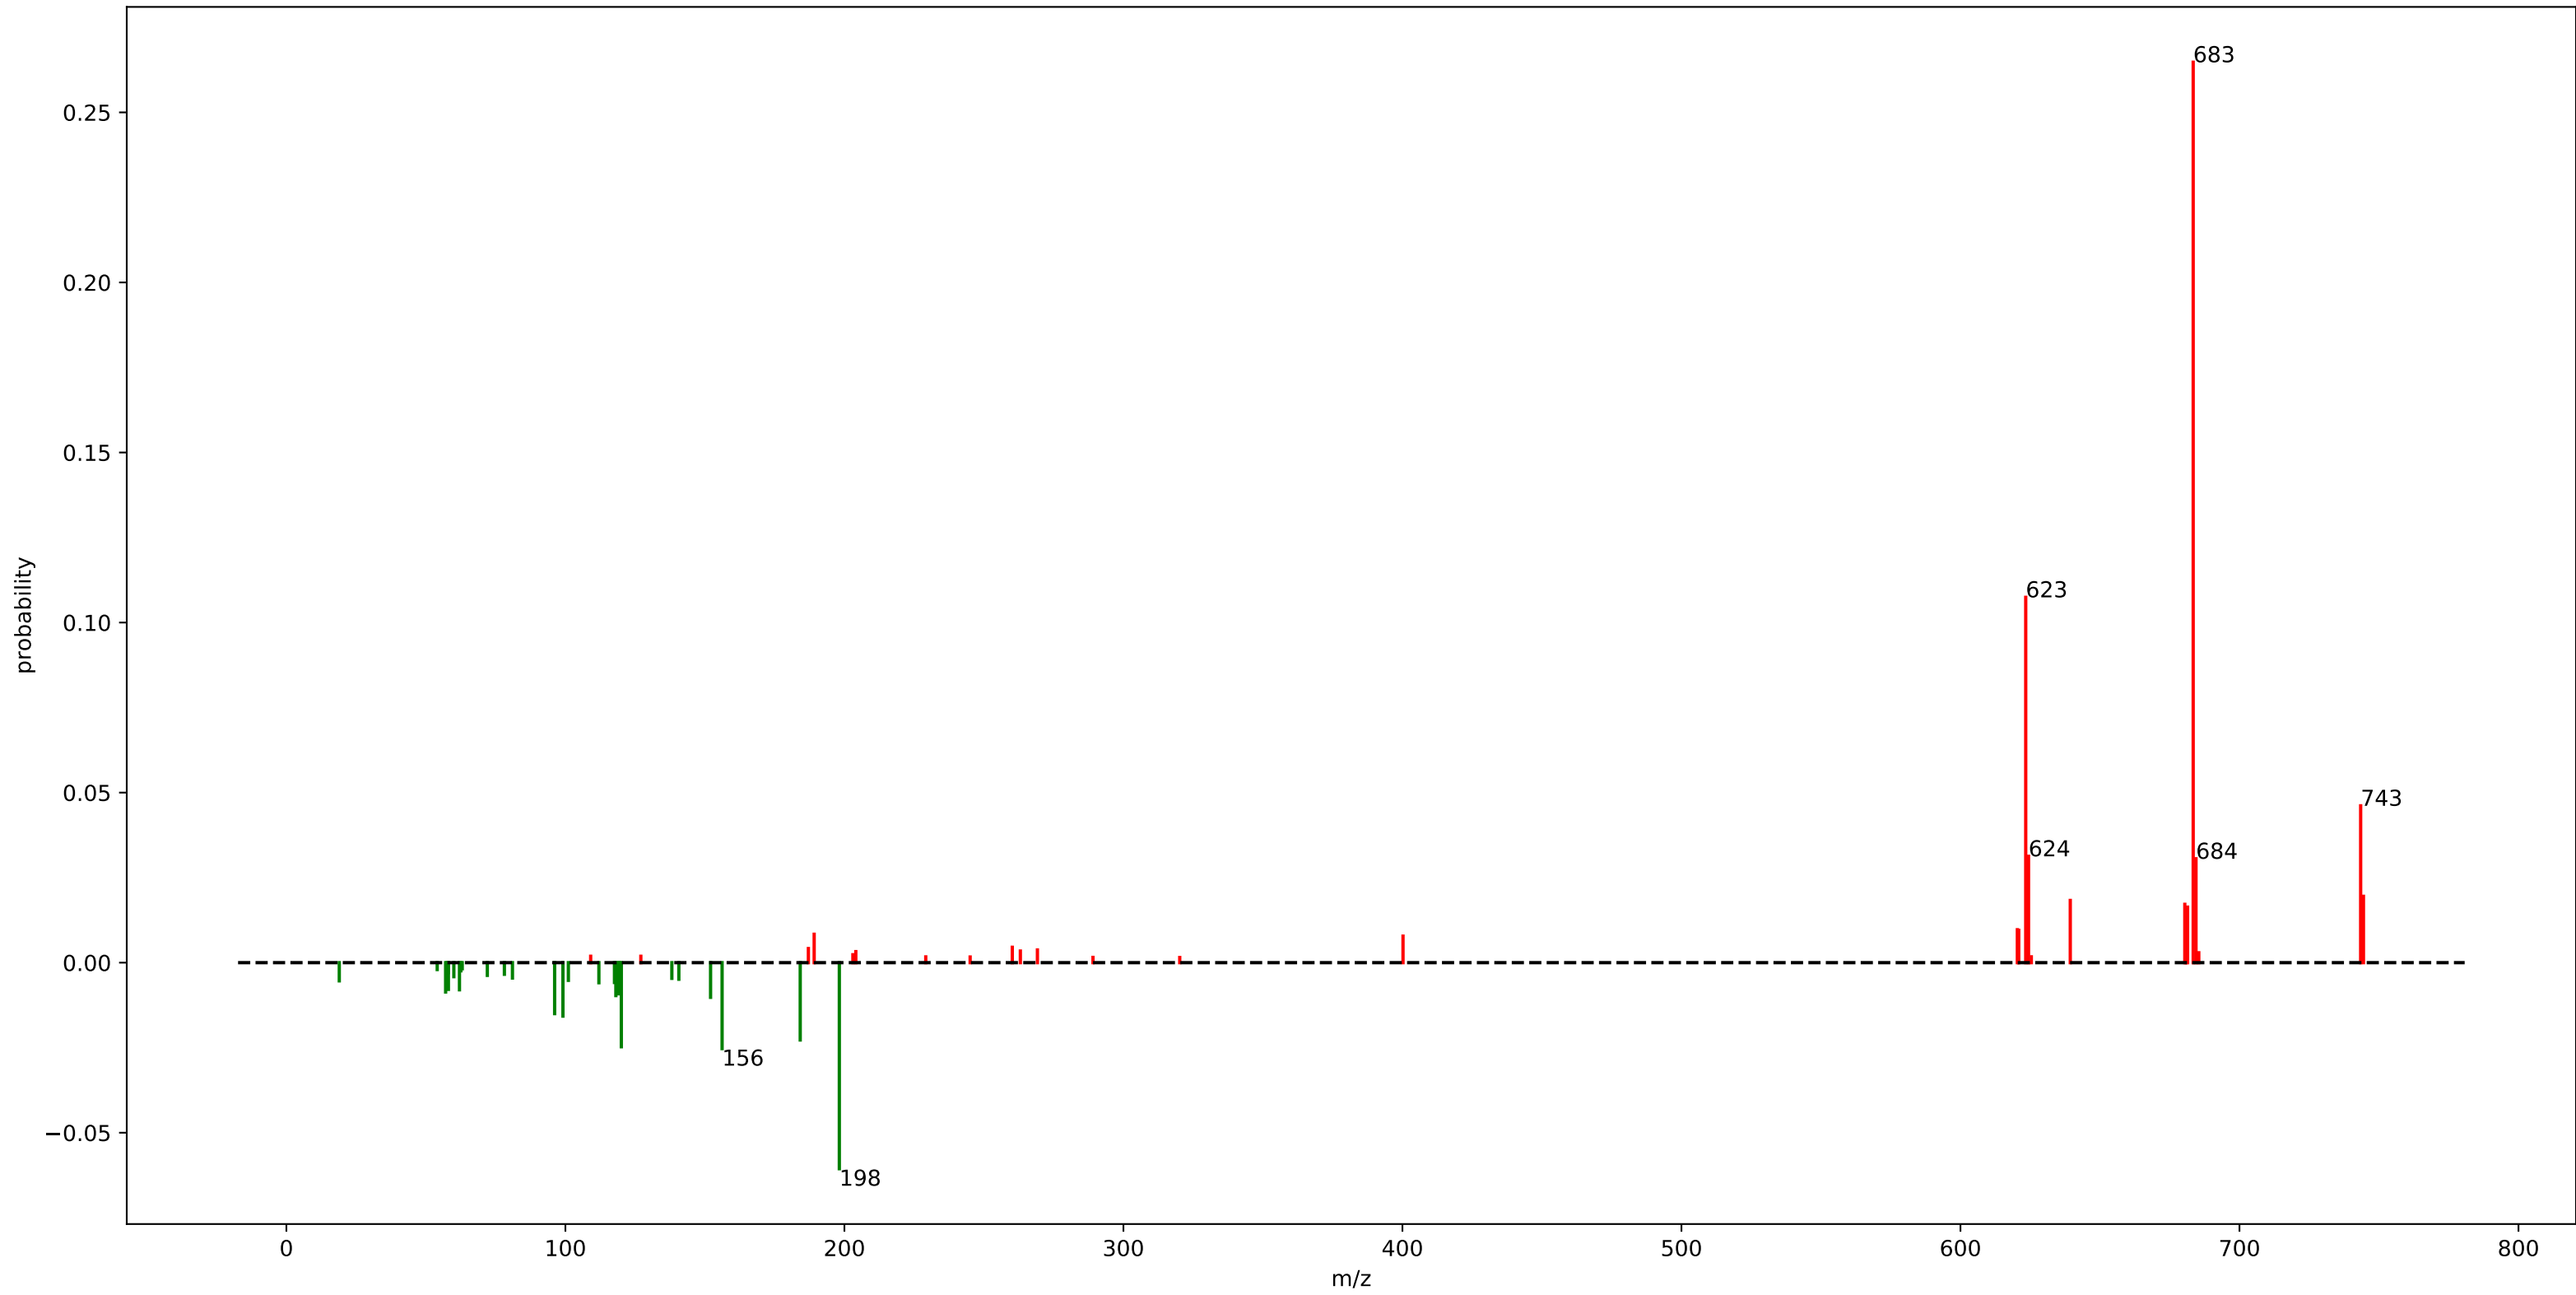

## motif\_635

|                   |        |                   |        |
|-------------------|--------|-------------------|--------|
| fragment_683.4125 | : 0.26 | loss_119.0375     | : 0.01 |
| fragment_623.3925 | : 0.11 | loss_57.0725      | : 0.01 |
| loss_198.1775     | : 0.06 | fragment_189.1625 | : 0.01 |
| fragment_743.4325 | : 0.05 | loss_62.0325      | : 0.01 |
| fragment_624.3975 | : 0.03 | loss_58.0675      | : 0.01 |
| fragment_684.4175 | : 0.03 | fragment_400.2075 | : 0.01 |
| loss_156.1625     | : 0.03 | loss_112.0025     | : 0.01 |
| loss_120.0425     | : 0.02 | loss_117.5875     | : 0.01 |
| loss_184.1625     | : 0.02 | loss_18.9575      | : 0.01 |
| fragment_744.4375 | : 0.02 | loss_101.0675     | : 0.01 |
| fragment_639.3575 | : 0.02 |                   |        |
| fragment_680.4075 | : 0.02 |                   |        |
| fragment_681.4025 | : 0.02 |                   |        |
| loss_99.1175      | : 0.02 |                   |        |
| loss_96.1425      | : 0.01 |                   |        |
| fragment_680.9075 | : 0.01 |                   |        |
| loss_152.0325     | : 0.01 |                   |        |
| fragment_620.3875 | : 0.01 |                   |        |
| loss_118.0875     | : 0.01 |                   |        |
| fragment_620.8875 | : 0.01 |                   |        |

urine\_mass2motif\_148.m2m

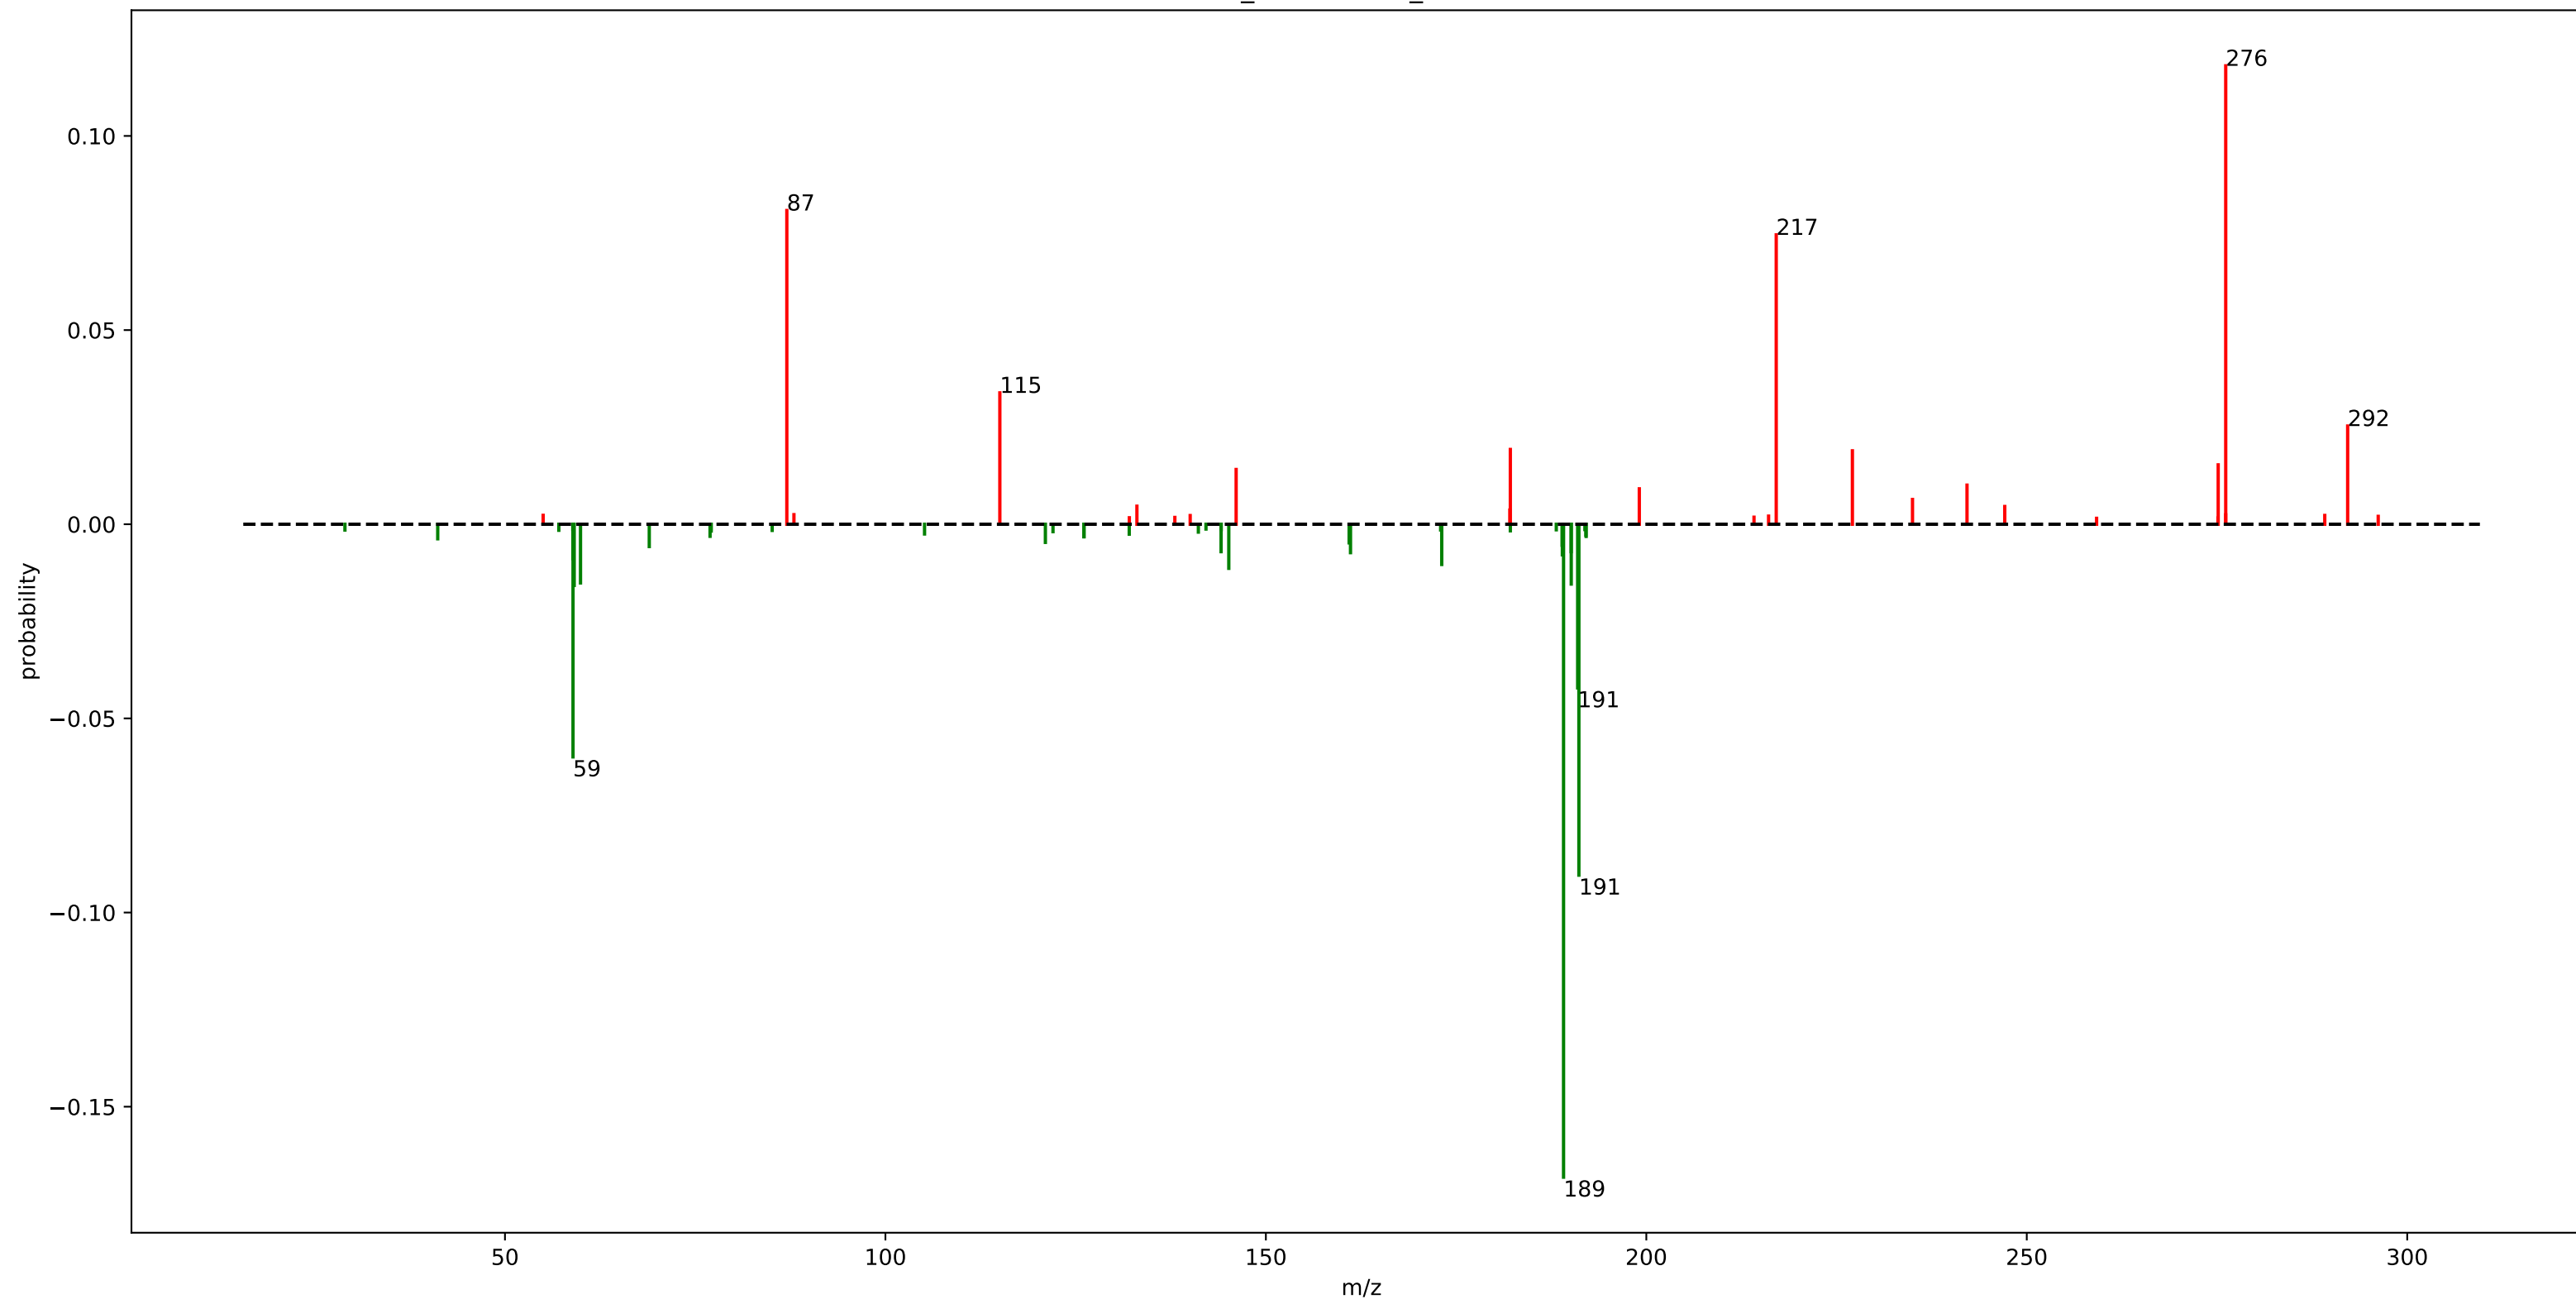

# urine\_mass2motif\_148.m2m

|                   |        |                   |        |
|-------------------|--------|-------------------|--------|
| loss_189.1225     | : 0.17 | loss_58.9375      | : 0.01 |
| fragment_276.1475 | : 0.12 | loss_188.9625     | : 0.01 |
| loss_191.1375     | : 0.09 | loss_161.1225     | : 0.01 |
| fragment_87.0425  | : 0.08 | loss_144.1125     | : 0.01 |
| fragment_217.0725 | : 0.07 | loss_190.1225     | : 0.01 |
| loss_58.9425      | : 0.06 | fragment_234.9825 | : 0.01 |
| loss_190.9775     | : 0.04 | loss_68.9625      | : 0.01 |
| fragment_115.0375 | : 0.03 | loss_188.9375     | : 0.01 |
| fragment_292.1725 | : 0.03 |                   |        |
| fragment_182.1275 | : 0.02 |                   |        |
| fragment_227.0825 | : 0.02 |                   |        |
| loss_59.0975      | : 0.02 |                   |        |
| loss_190.1325     | : 0.02 |                   |        |
| fragment_275.1575 | : 0.02 |                   |        |
| loss_59.9275      | : 0.02 |                   |        |
| fragment_146.0925 | : 0.01 |                   |        |
| loss_145.1275     | : 0.01 |                   |        |
| loss_173.1125     | : 0.01 |                   |        |
| fragment_242.1475 | : 0.01 |                   |        |
| fragment_199.0775 | : 0.01 |                   |        |



gnps\_motif\_49.m2m

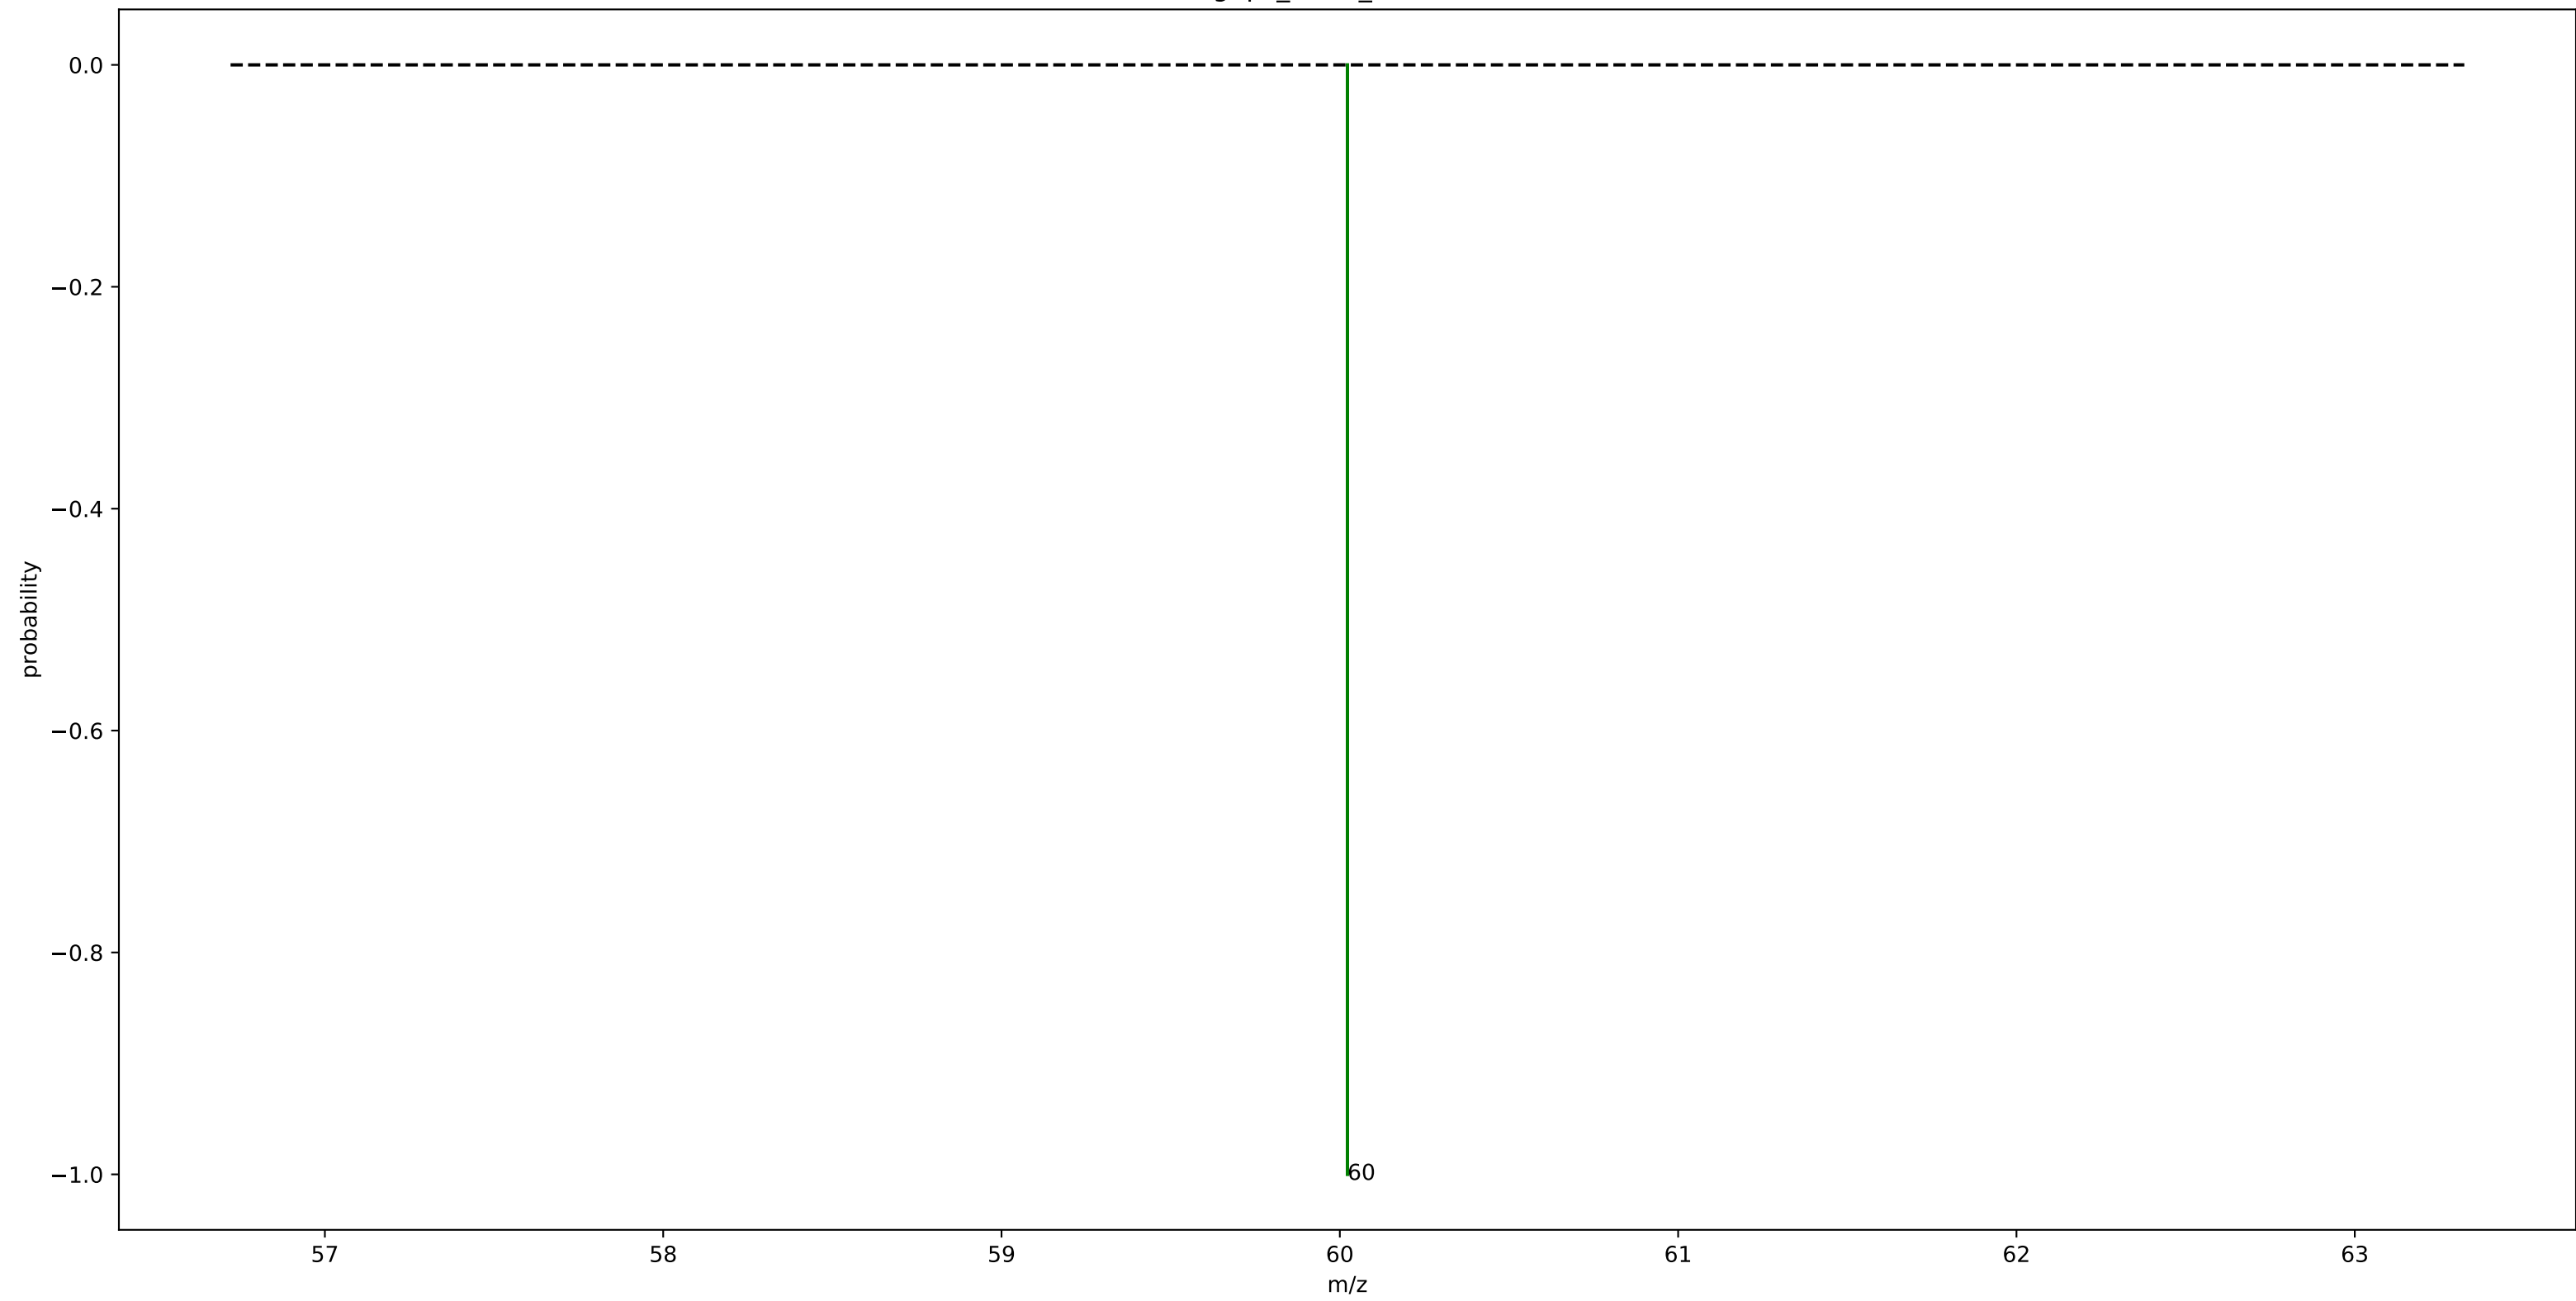

gnps\_motif\_49.m2m

loss\_60.0225 : 1.00

motif\_625

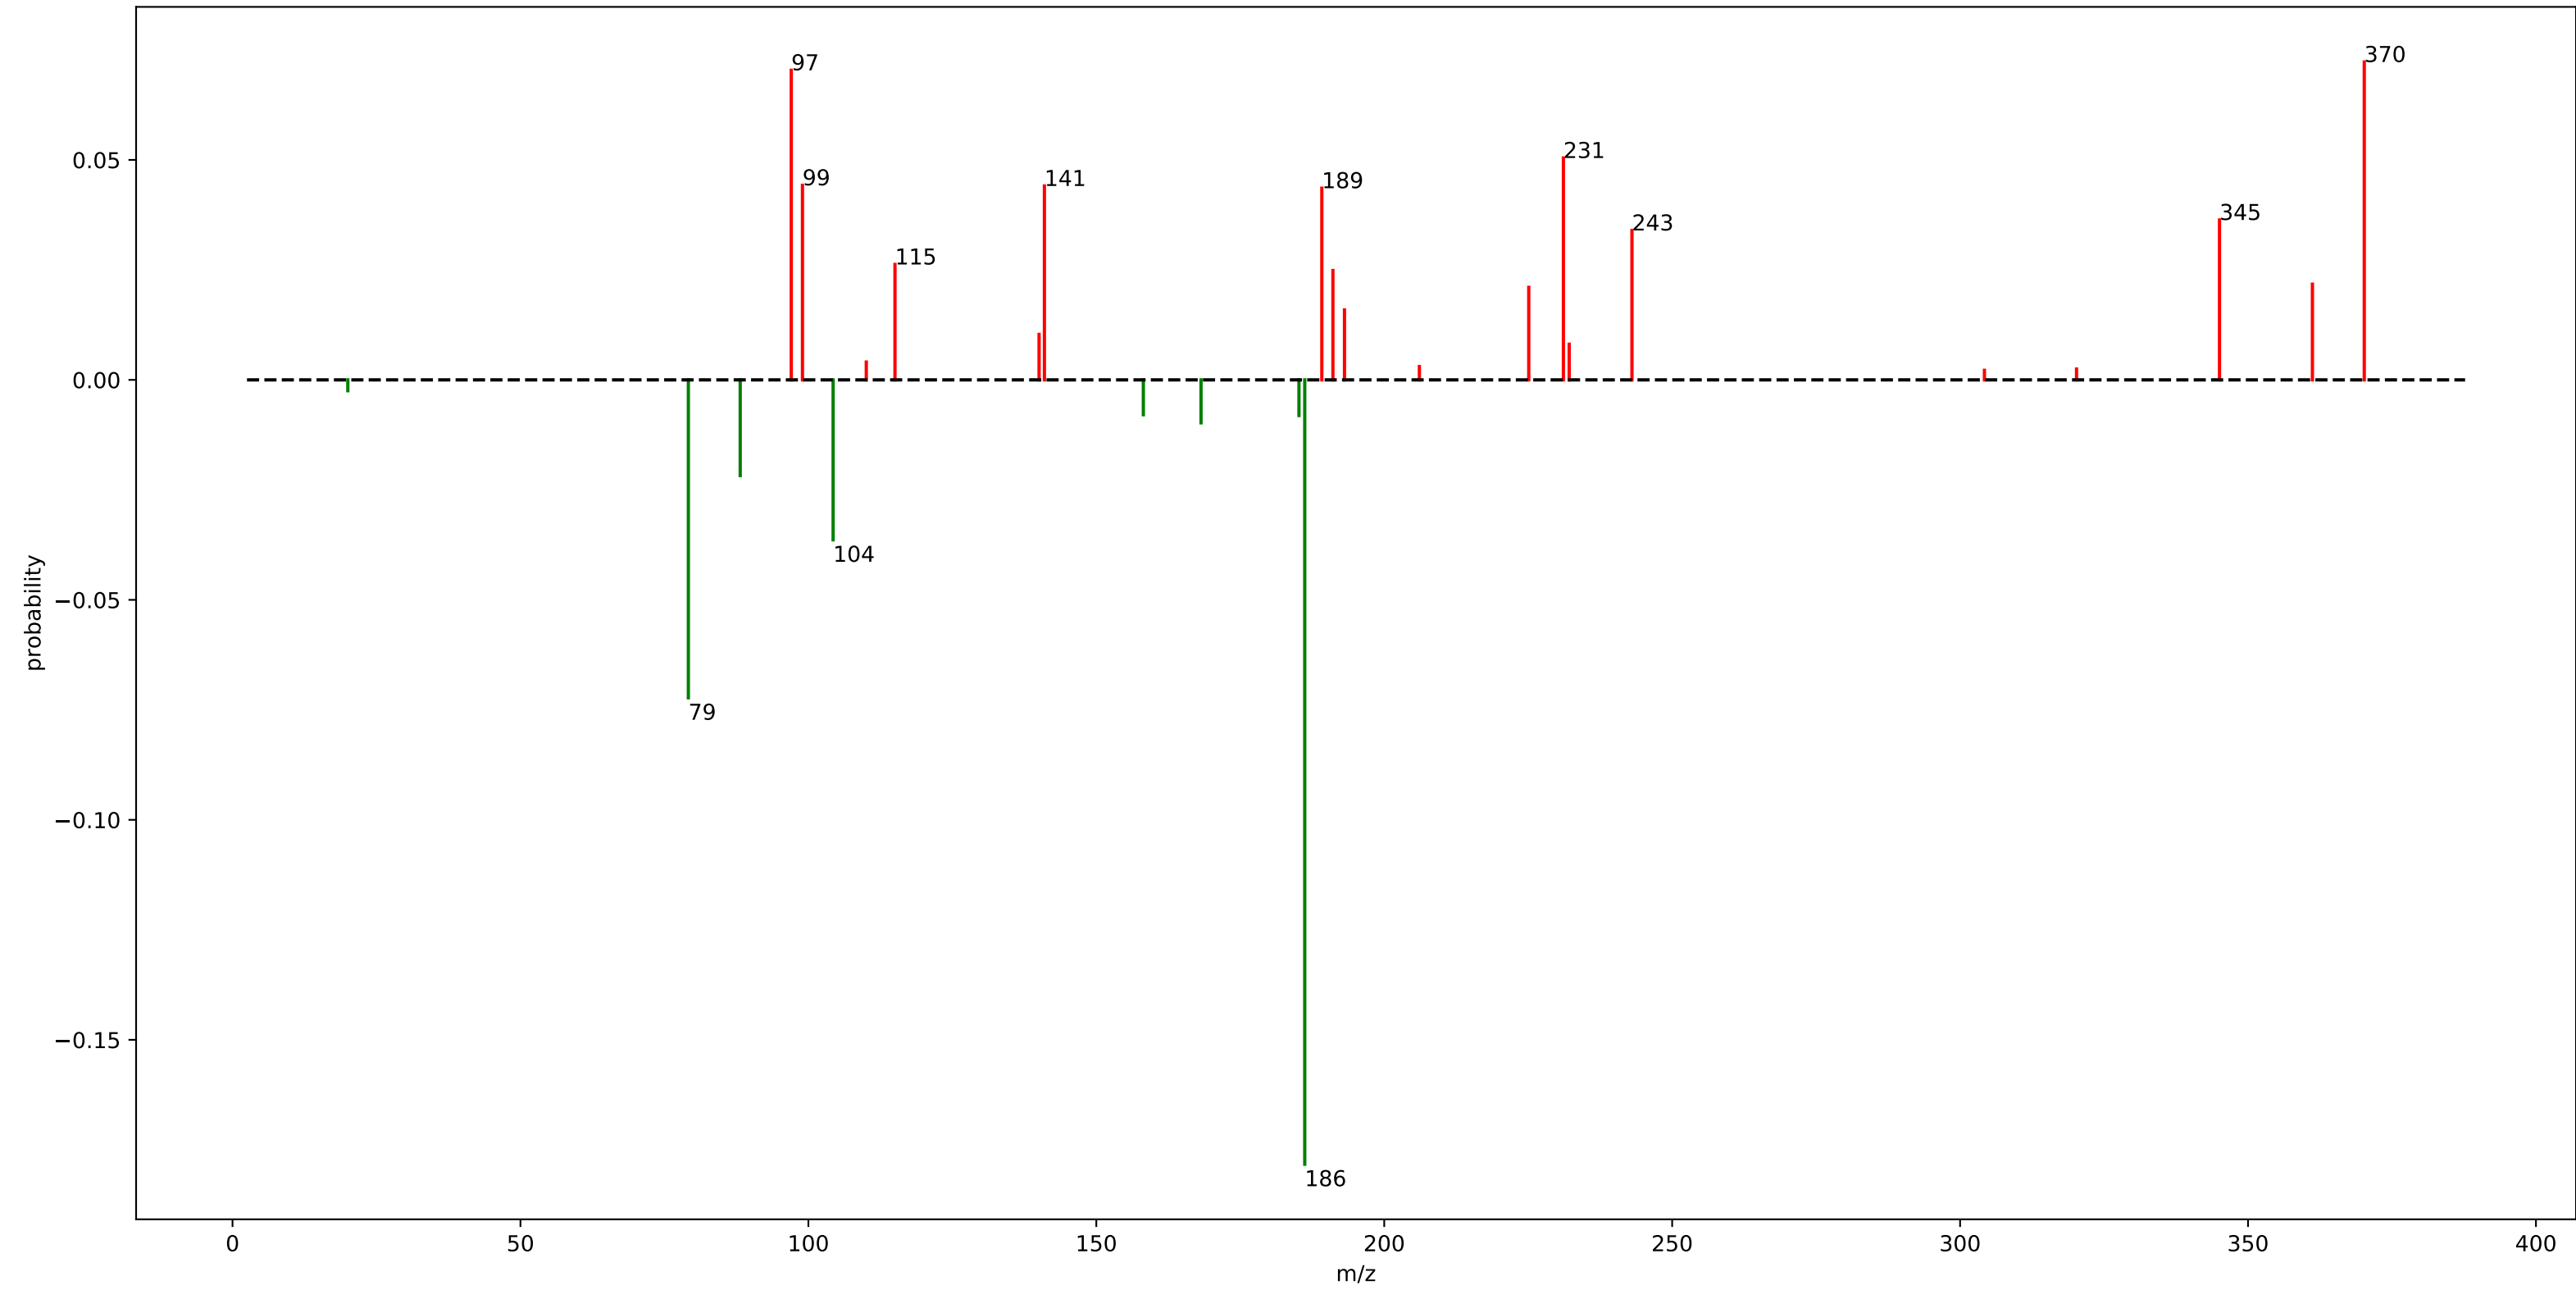

## motif\_625

|                   |        |                   |        |
|-------------------|--------|-------------------|--------|
| loss_186.1975     | : 0.18 | fragment_232.1175 | : 0.01 |
| loss_79.1575      | : 0.07 | loss_158.1675     | : 0.01 |
| fragment_370.1875 | : 0.07 |                   |        |
| fragment_97.0275  | : 0.07 |                   |        |
| fragment_231.1125 | : 0.05 |                   |        |
| fragment_98.9725  | : 0.04 |                   |        |
| fragment_140.9875 | : 0.04 |                   |        |
| fragment_189.1625 | : 0.04 |                   |        |
| fragment_345.0475 | : 0.04 |                   |        |
| loss_104.2975     | : 0.04 |                   |        |
| fragment_243.0175 | : 0.03 |                   |        |
| fragment_115.0375 | : 0.03 |                   |        |
| fragment_191.0875 | : 0.02 |                   |        |
| fragment_361.1825 | : 0.02 |                   |        |
| loss_88.1625      | : 0.02 |                   |        |
| fragment_225.0975 | : 0.02 |                   |        |
| fragment_193.0975 | : 0.02 |                   |        |
| fragment_140.0625 | : 0.01 |                   |        |
| loss_168.1875     | : 0.01 |                   |        |
| loss_185.1925     | : 0.01 |                   |        |

StrepSalini\_motif\_283.m2m

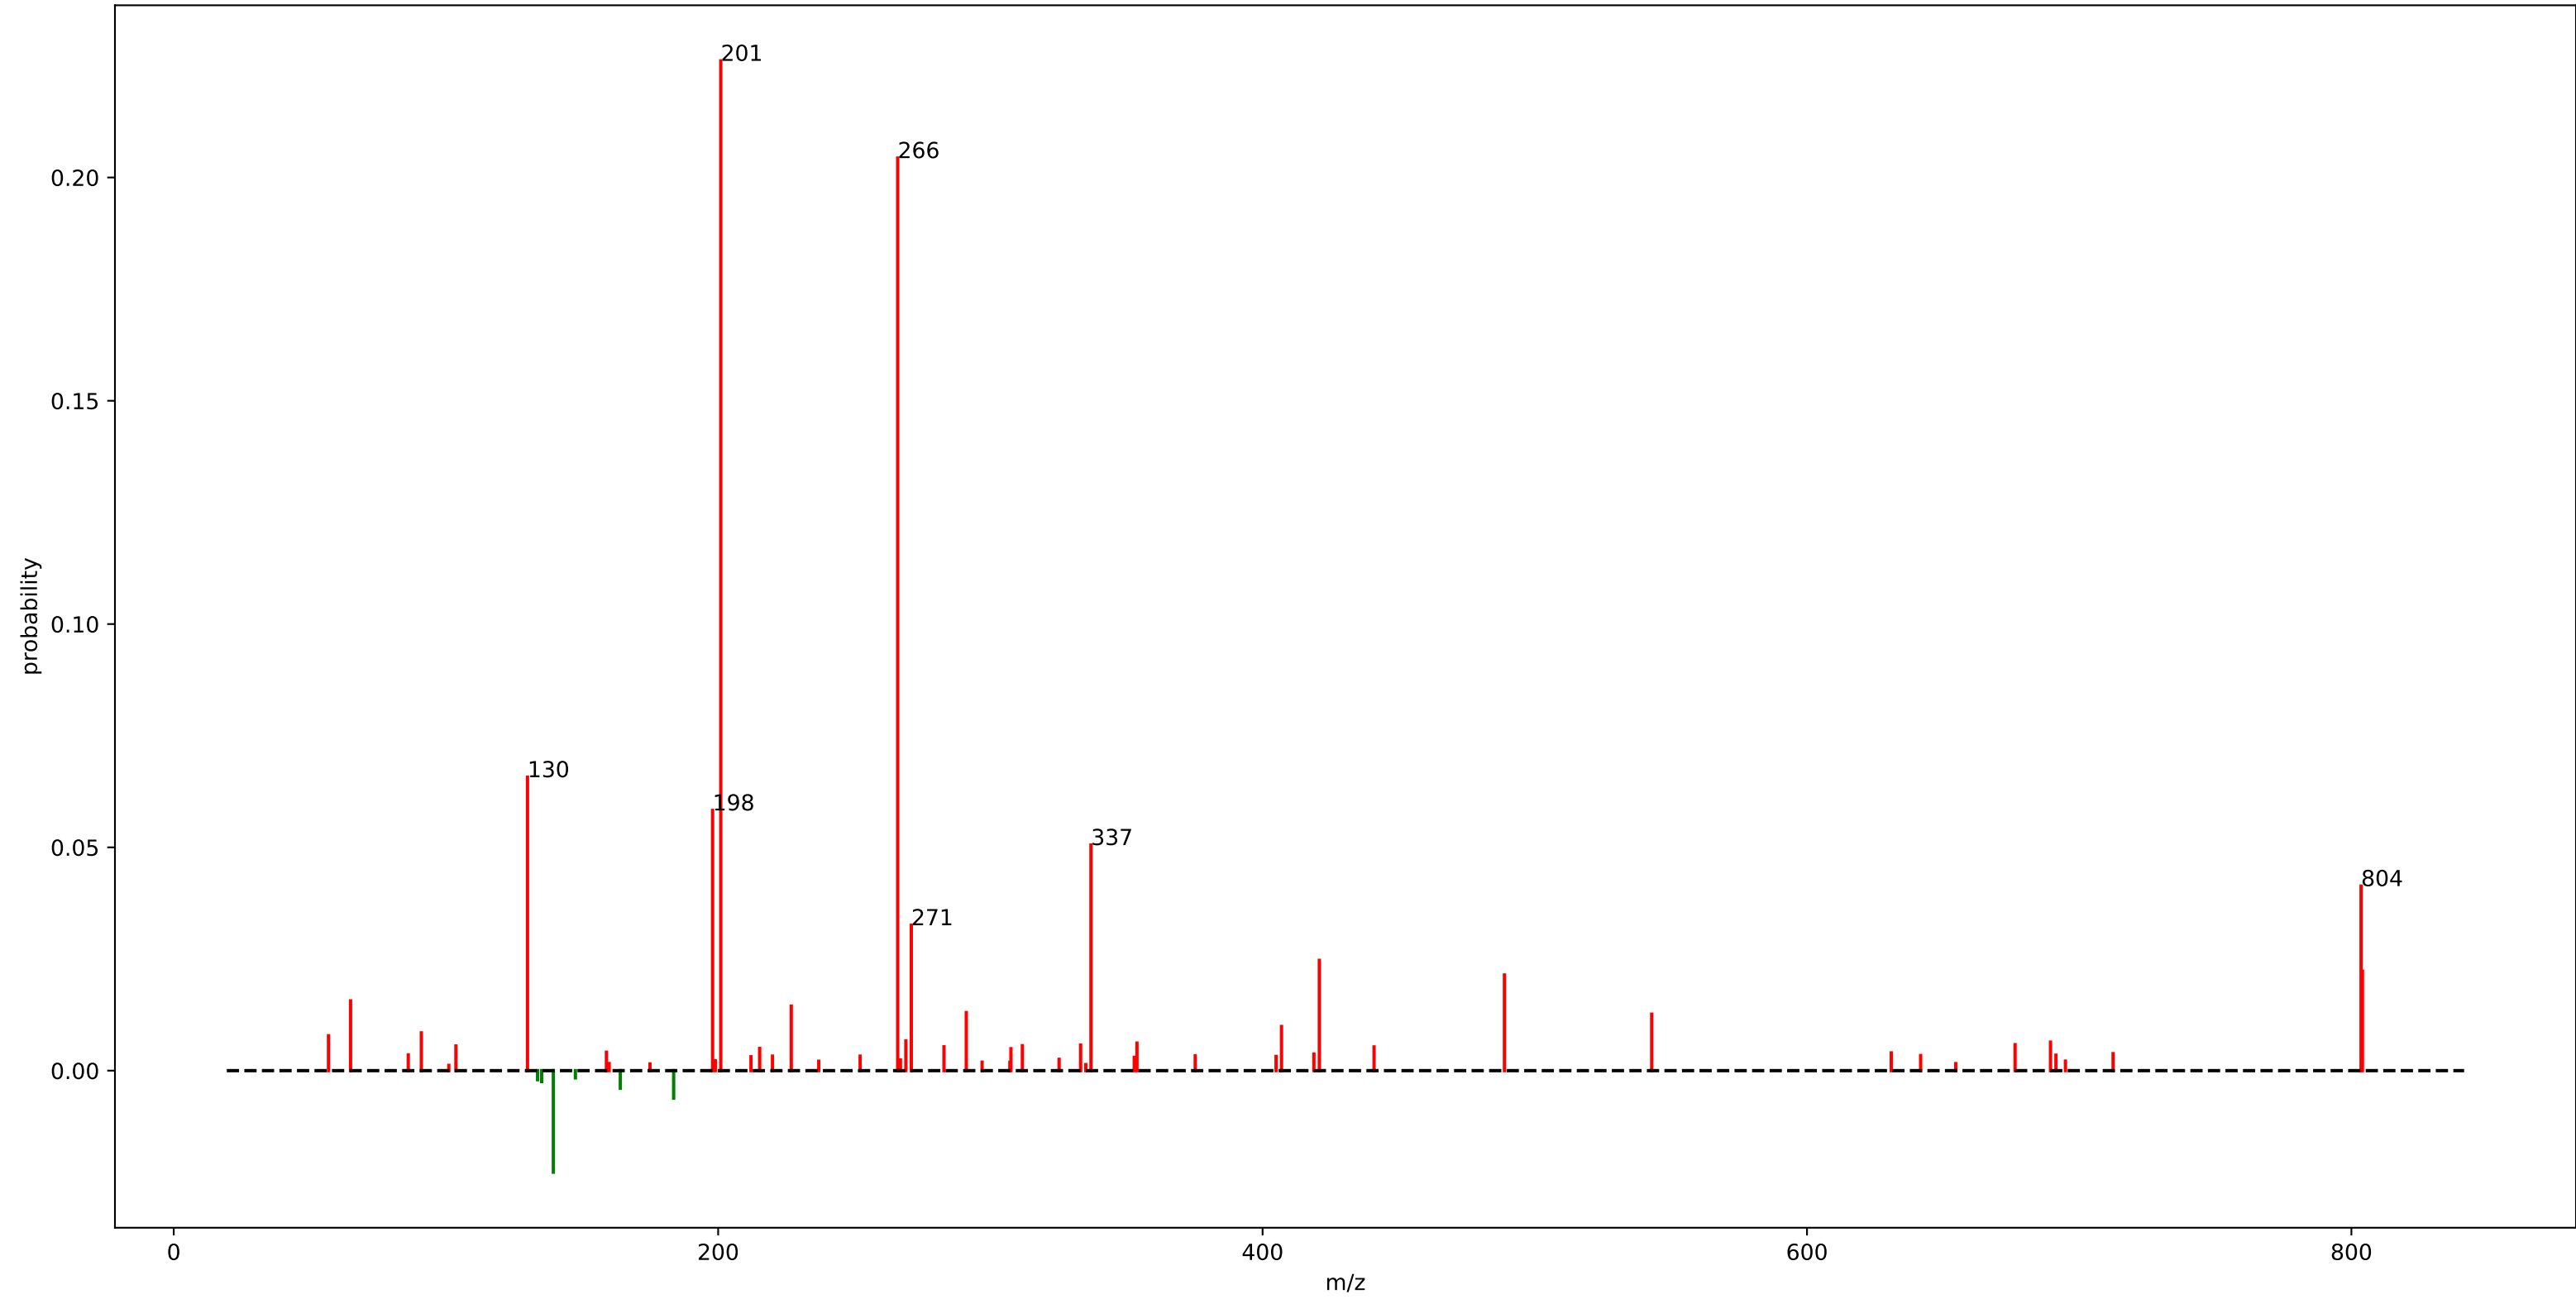

## StrepSalini\_motif\_283.m2m

|                   |        |                   |        |
|-------------------|--------|-------------------|--------|
| fragment_200.9500 | : 0.23 | fragment_353.8500 | : 0.01 |
| fragment_265.9500 | : 0.20 | loss_183.6500     | : 0.01 |
| fragment_129.9500 | : 0.07 | fragment_676.4500 | : 0.01 |
| fragment_197.9500 | : 0.06 | fragment_333.1500 | : 0.01 |
| fragment_336.9500 | : 0.05 | fragment_311.7500 | : 0.01 |
| fragment_803.5500 | : 0.04 | fragment_103.6500 | : 0.01 |
| fragment_270.9500 | : 0.03 | fragment_282.9500 | : 0.01 |
| fragment_420.8500 | : 0.02 | fragment_440.9500 | : 0.01 |
| loss_139.4500     | : 0.02 |                   |        |
| fragment_804.0500 | : 0.02 |                   |        |
| fragment_488.8500 | : 0.02 |                   |        |
| fragment_64.9500  | : 0.02 |                   |        |
| fragment_226.8500 | : 0.01 |                   |        |
| fragment_291.1500 | : 0.01 |                   |        |
| fragment_542.9500 | : 0.01 |                   |        |
| fragment_406.9500 | : 0.01 |                   |        |
| fragment_90.9500  | : 0.01 |                   |        |
| fragment_56.8500  | : 0.01 |                   |        |
| fragment_268.9500 | : 0.01 |                   |        |
| fragment_689.4500 | : 0.01 |                   |        |

urine\_mass2motif\_191.m2m

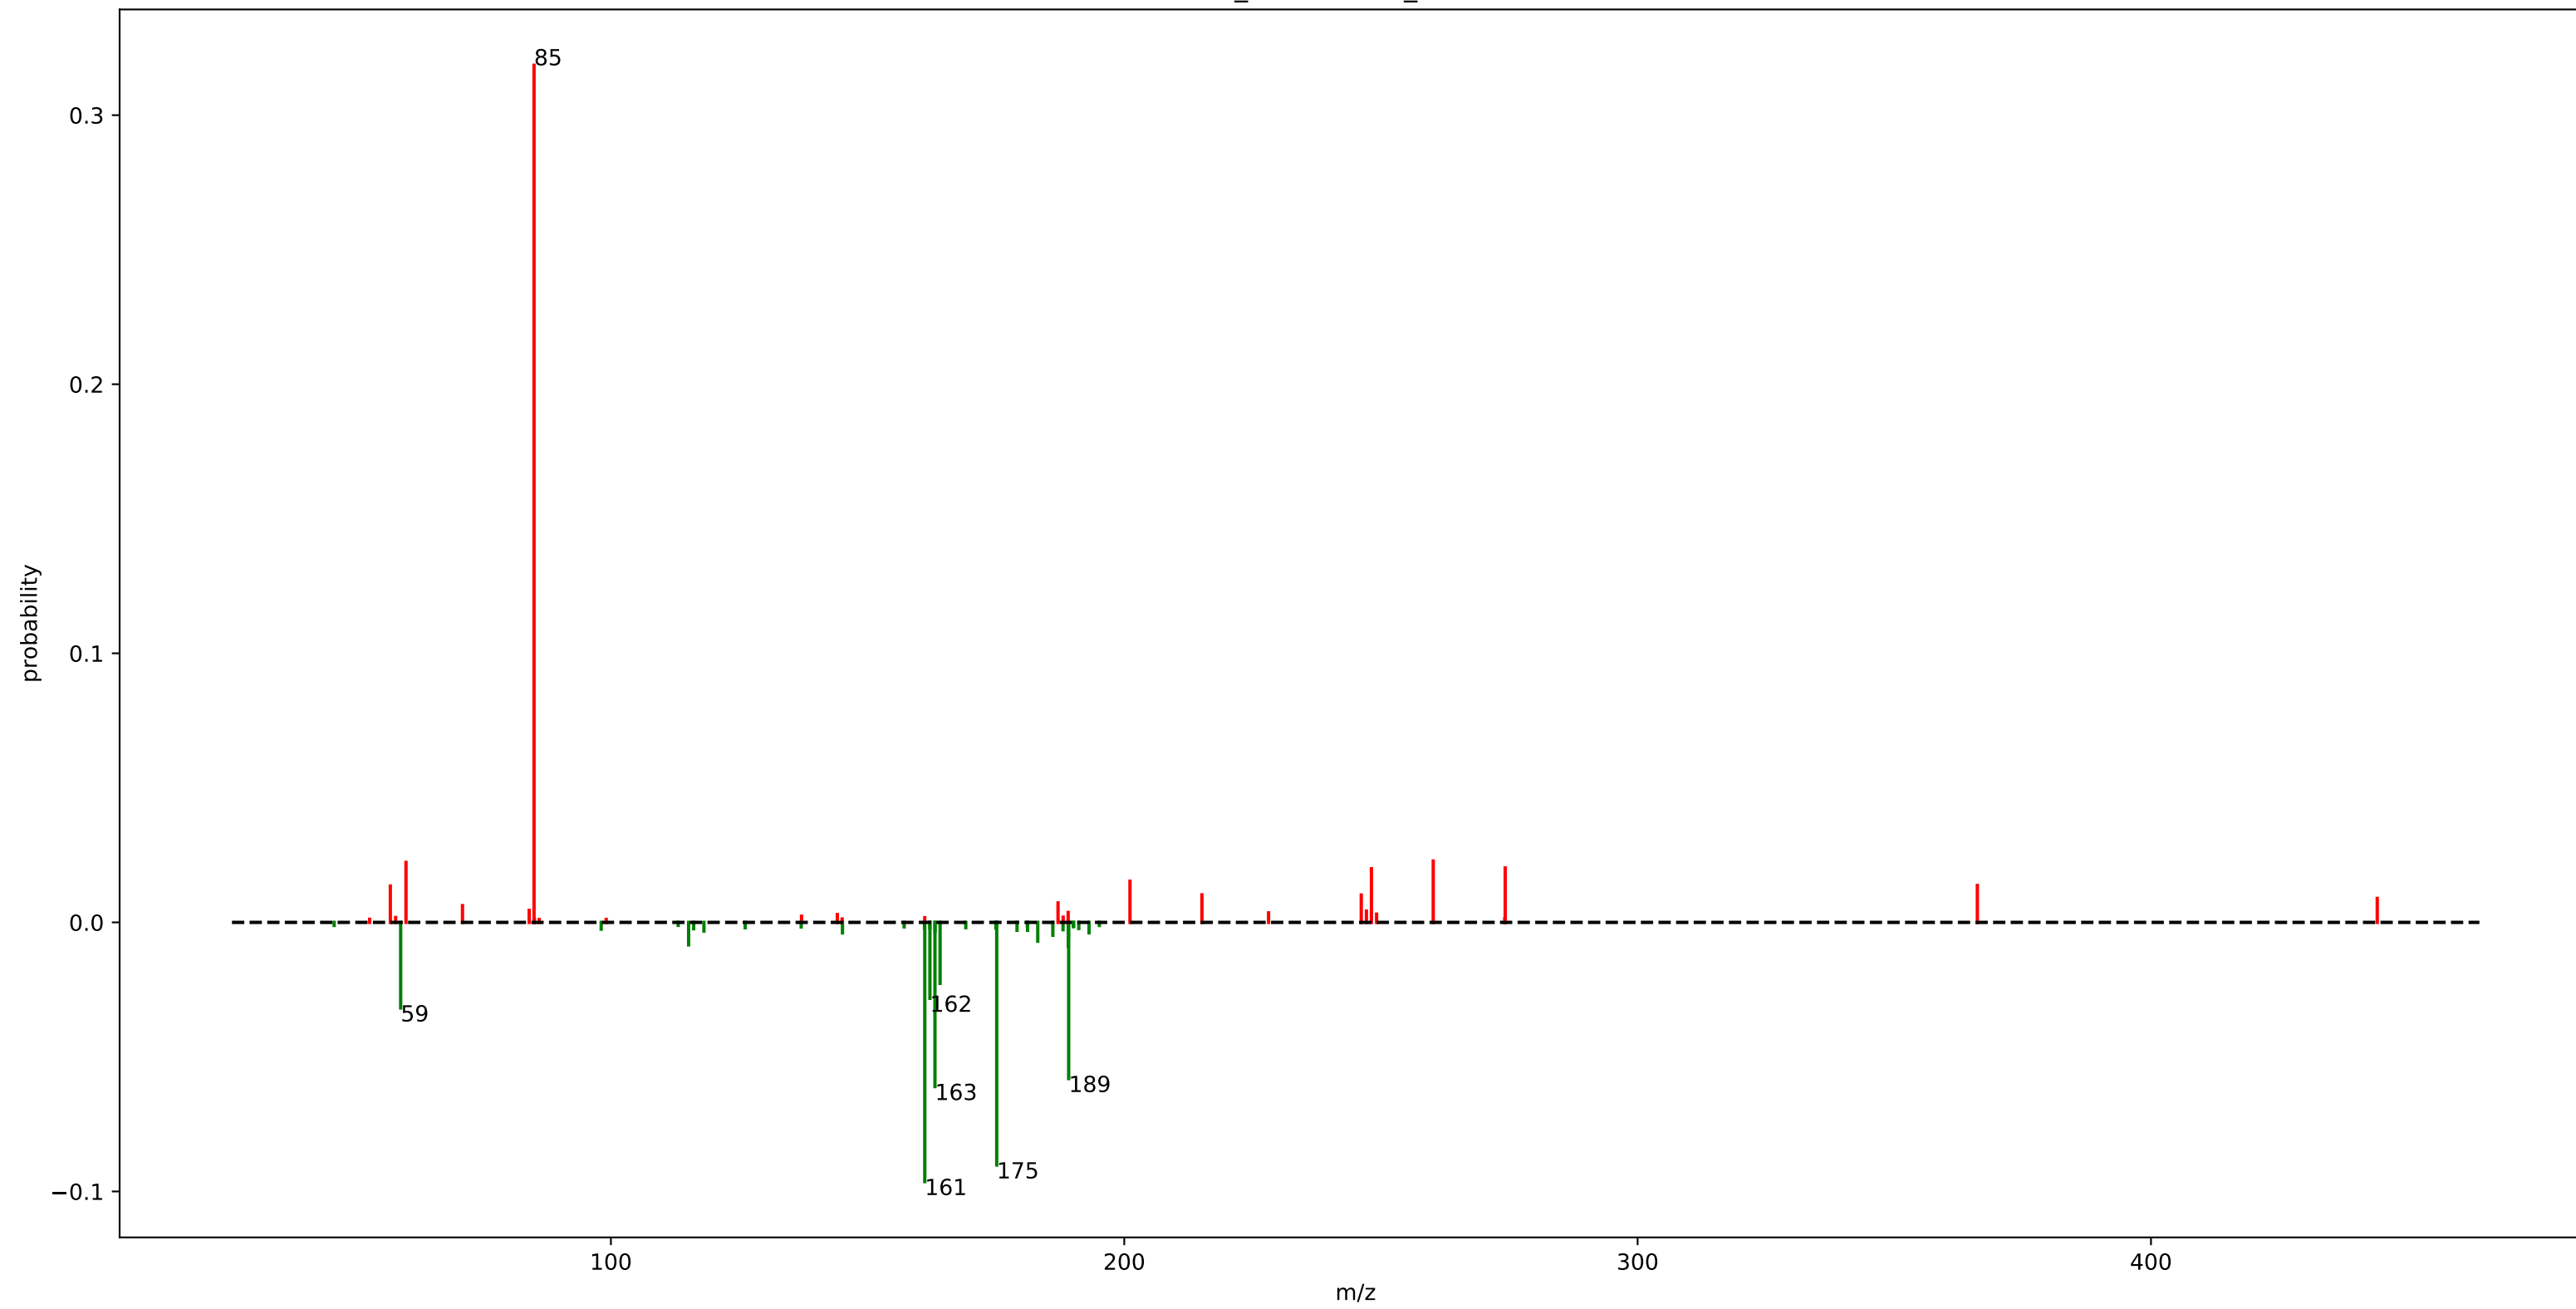

# urine\_mass2motif\_191.m2m

|                   |        |                   |        |
|-------------------|--------|-------------------|--------|
| fragment_85.0275  | : 0.32 | fragment_187.0975 | : 0.01 |
| loss_161.1425     | : 0.10 | loss_183.1475     | : 0.01 |
| loss_175.1575     | : 0.09 | fragment_71.0875  | : 0.01 |
| loss_163.1225     | : 0.06 | loss_189.1225     | : 0.01 |
| loss_189.1725     | : 0.06 |                   |        |
| loss_59.0475      | : 0.03 |                   |        |
| loss_162.1425     | : 0.03 |                   |        |
| fragment_260.1875 | : 0.02 |                   |        |
| loss_164.1225     | : 0.02 |                   |        |
| fragment_60.0825  | : 0.02 |                   |        |
| fragment_274.2025 | : 0.02 |                   |        |
| fragment_248.1475 | : 0.02 |                   |        |
| fragment_201.1125 | : 0.02 |                   |        |
| fragment_366.1775 | : 0.01 |                   |        |
| fragment_57.0325  | : 0.01 |                   |        |
| fragment_215.1275 | : 0.01 |                   |        |
| fragment_246.1675 | : 0.01 |                   |        |
| loss_189.0925     | : 0.01 |                   |        |
| fragment_444.0775 | : 0.01 |                   |        |
| loss_115.1375     | : 0.01 |                   |        |



gnps\_motif\_36.m2m

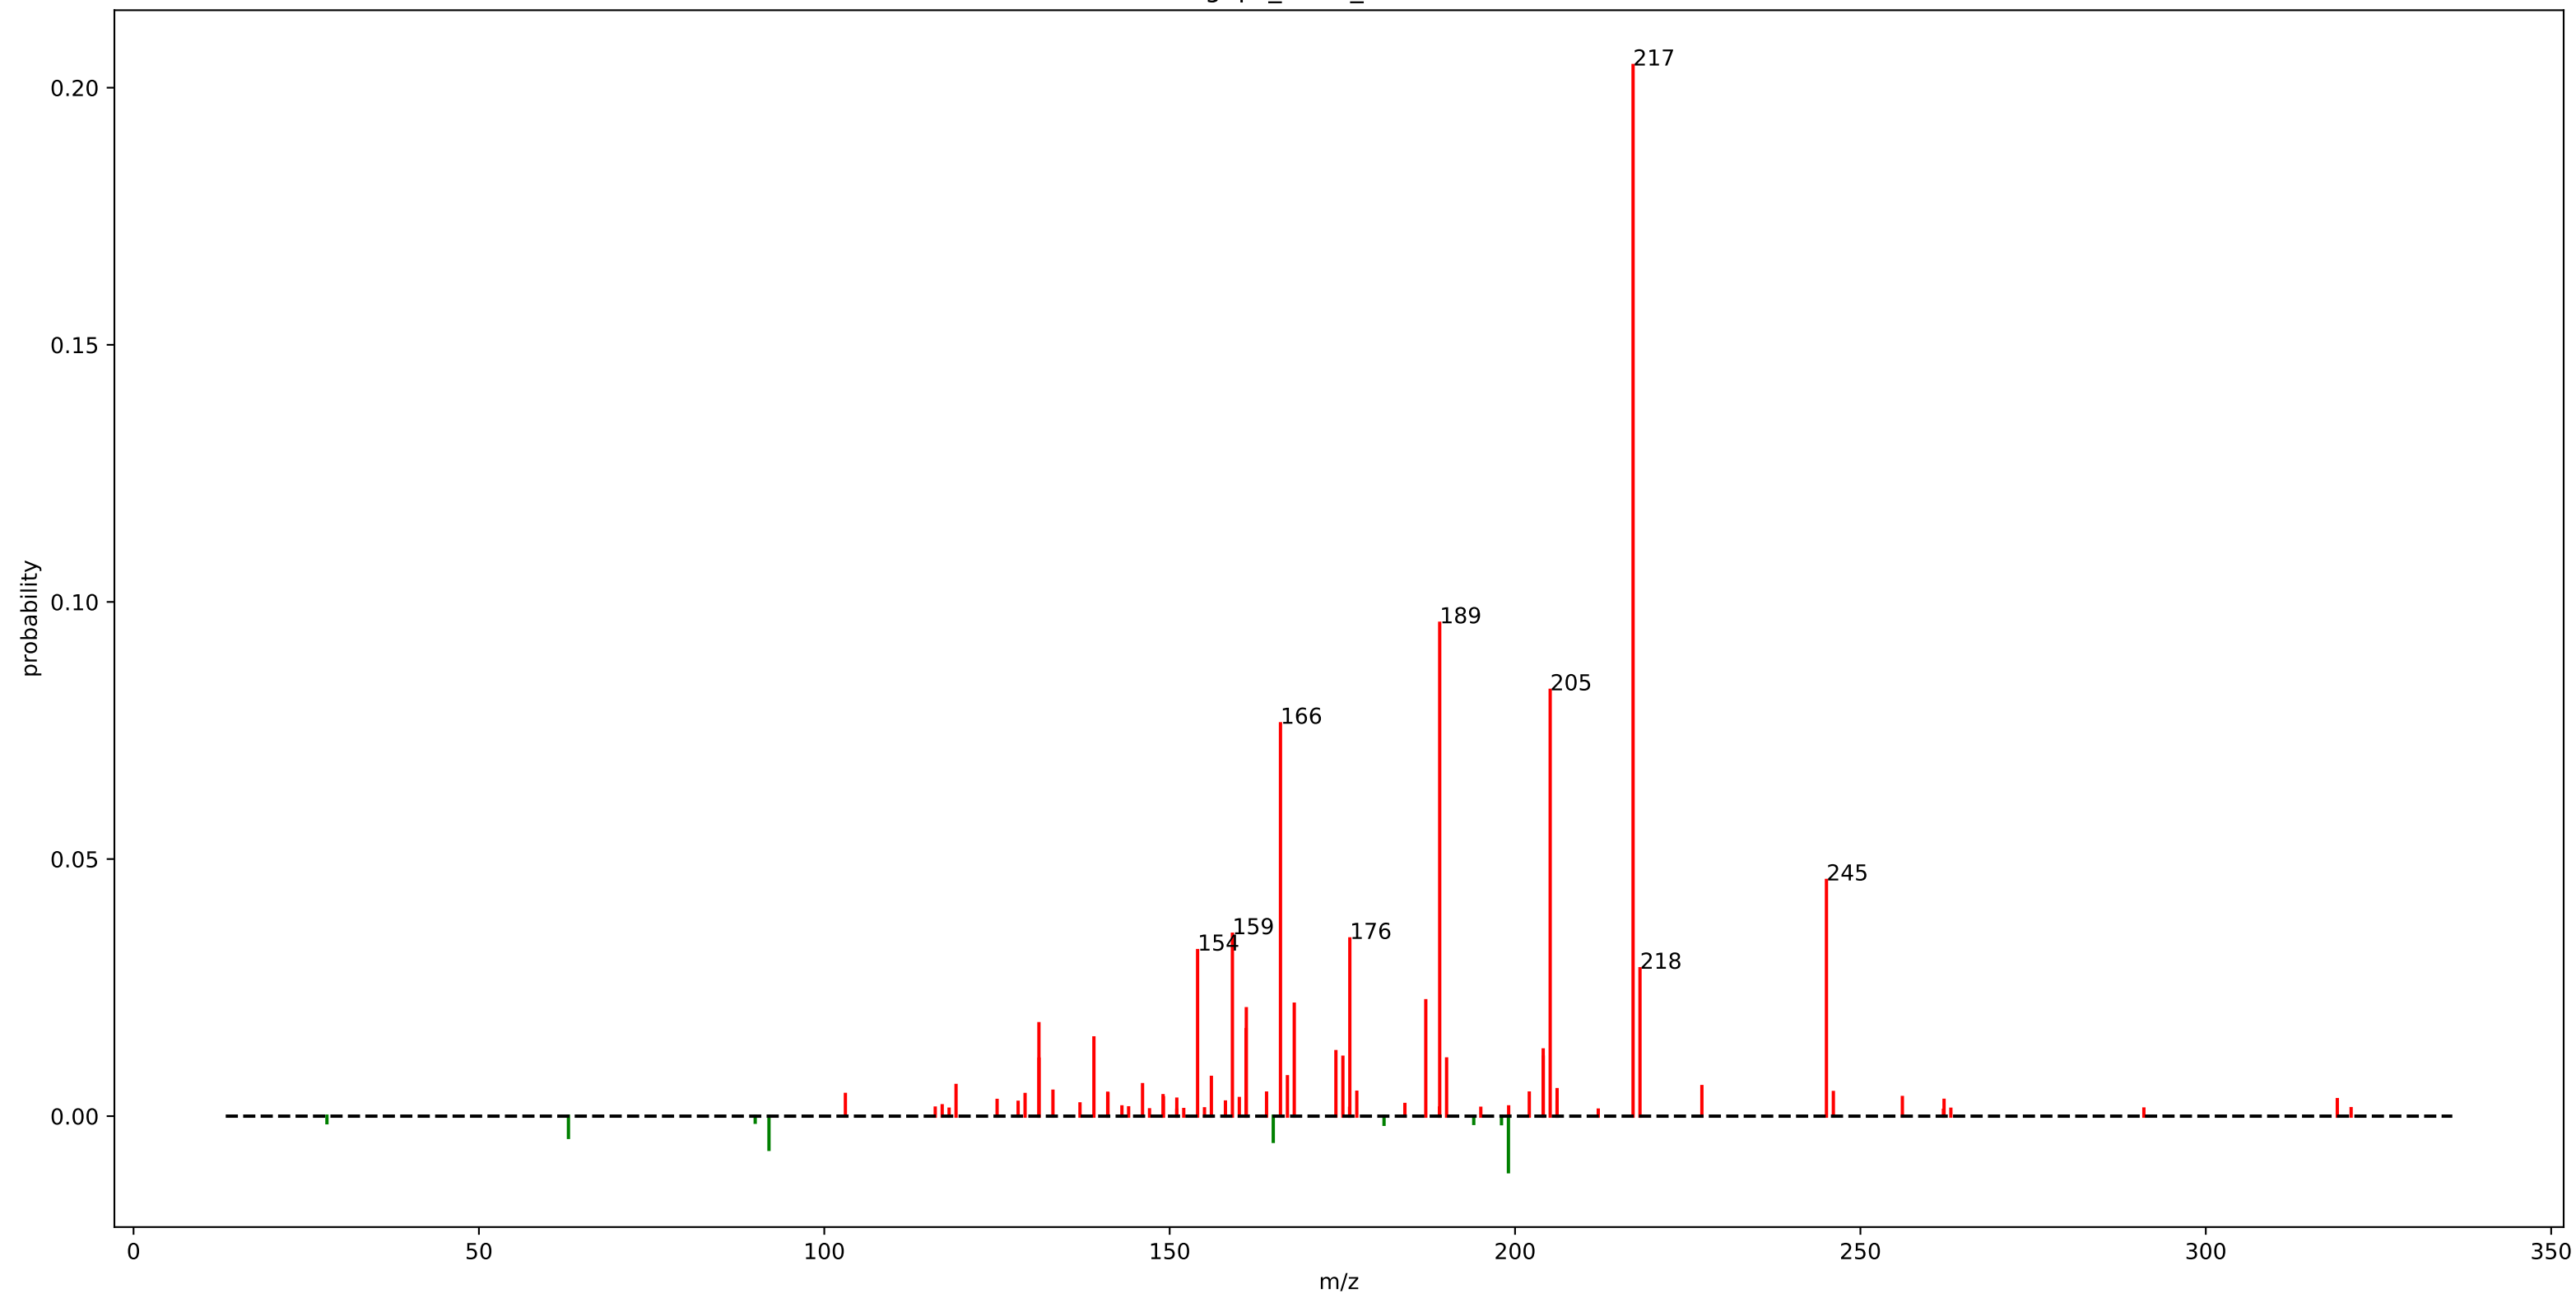

## gnps\_motif\_36.m2m

|                   |        |                   |        |
|-------------------|--------|-------------------|--------|
| fragment_217.0875 | : 0.20 | fragment_131.0875 | : 0.01 |
| fragment_189.0925 | : 0.10 | loss_199.0425     | : 0.01 |
| fragment_205.0875 | : 0.08 | fragment_167.0475 | : 0.01 |
| fragment_166.0425 | : 0.08 | fragment_156.0375 | : 0.01 |
| fragment_245.0825 | : 0.05 | loss_91.9925      | : 0.01 |
| fragment_159.0825 | : 0.04 | fragment_146.0725 | : 0.01 |
| fragment_176.0825 | : 0.03 | fragment_119.0725 | : 0.01 |
| fragment_154.0425 | : 0.03 | fragment_227.0475 | : 0.01 |
| fragment_218.0875 | : 0.03 | fragment_206.0875 | : 0.01 |
| fragment_187.0775 | : 0.02 |                   |        |
| fragment_168.0375 | : 0.02 |                   |        |
| fragment_161.0975 | : 0.02 |                   |        |
| fragment_131.0725 | : 0.02 |                   |        |
| fragment_161.0575 | : 0.02 |                   |        |
| fragment_139.0325 | : 0.02 |                   |        |
| fragment_204.0775 | : 0.01 |                   |        |
| fragment_174.0675 | : 0.01 |                   |        |
| fragment_204.0825 | : 0.01 |                   |        |
| fragment_175.0775 | : 0.01 |                   |        |
| fragment_190.0925 | : 0.01 |                   |        |

motif\_510

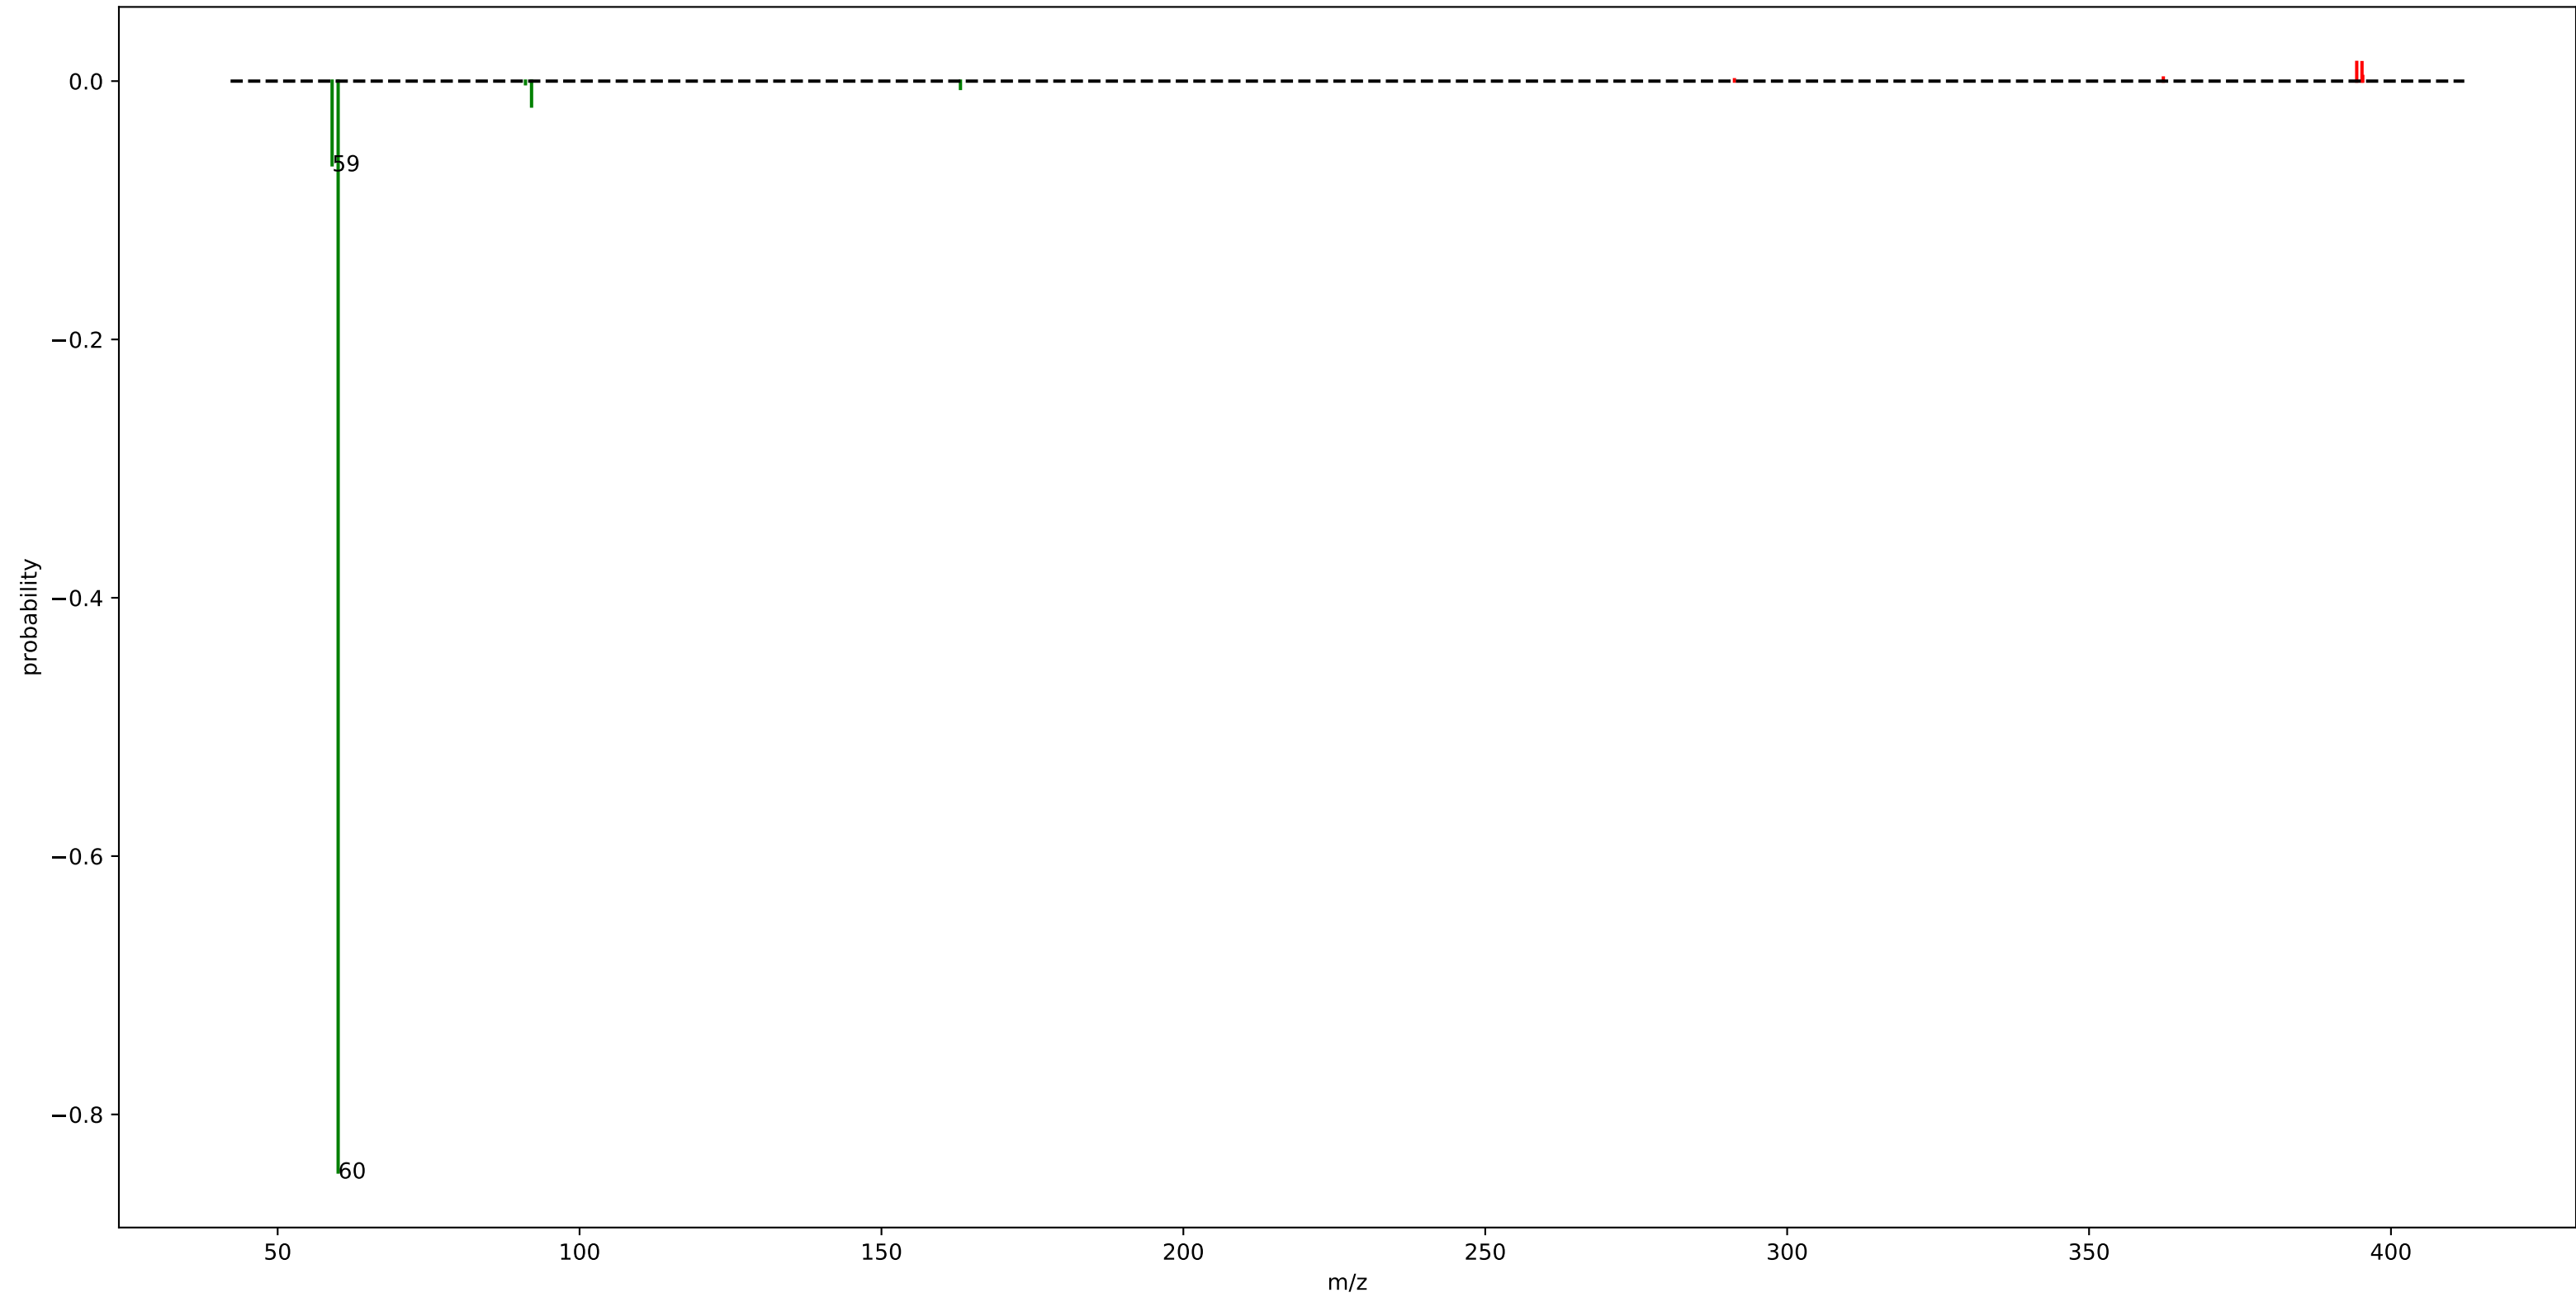

## motif\_510

|                   |        |
|-------------------|--------|
| loss_60.0175      | : 0.84 |
| loss_59.0175      | : 0.06 |
| loss_92.0475      | : 0.02 |
| fragment_394.3325 | : 0.01 |
| fragment_395.2025 | : 0.01 |
| loss_163.0825     | : 0.01 |

euphorbia\_motif\_182.m2m

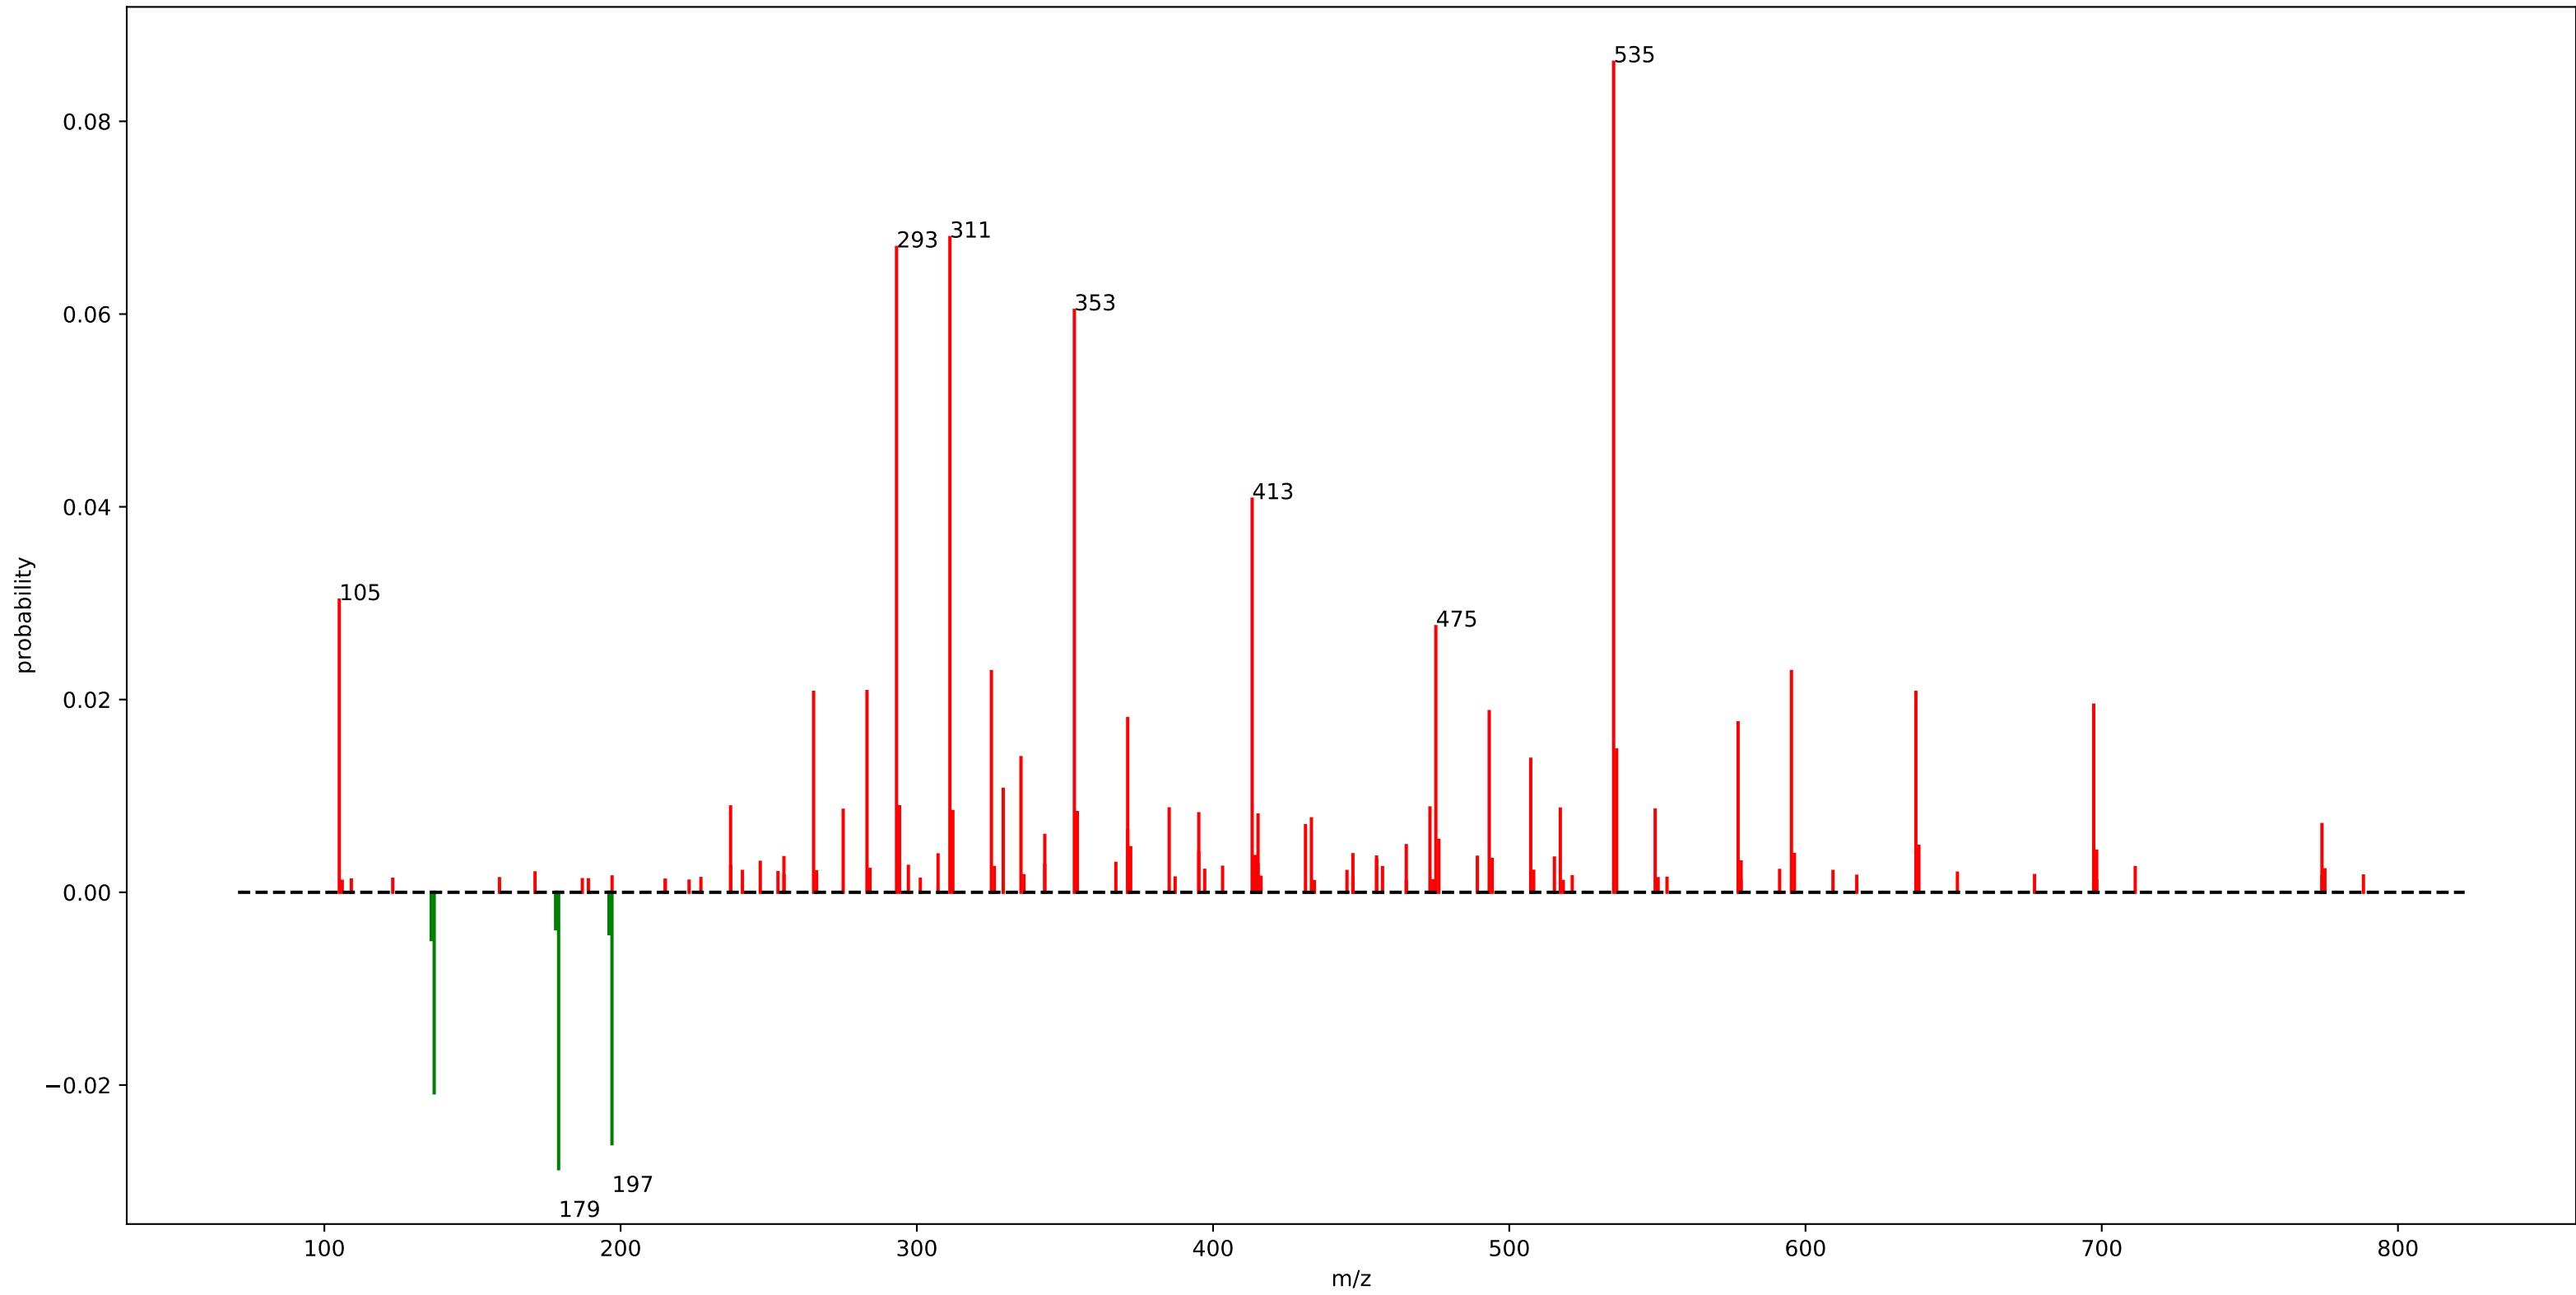

# euphorbia\_motif\_182.m2m

|                   |        |                   |        |
|-------------------|--------|-------------------|--------|
| fragment_535.2325 | : 0.09 | fragment_335.1625 | : 0.01 |
| fragment_311.1625 | : 0.07 | fragment_507.2375 | : 0.01 |
| fragment_293.1525 | : 0.07 | fragment_329.1725 | : 0.01 |
| fragment_353.1725 | : 0.06 | fragment_294.1575 | : 0.01 |
| fragment_413.1975 | : 0.04 | fragment_237.1275 | : 0.01 |
| fragment_105.0325 | : 0.03 | fragment_473.2175 | : 0.01 |
| loss_179.0775     | : 0.03 | fragment_385.1975 | : 0.01 |
| fragment_475.2125 | : 0.03 | fragment_517.2225 | : 0.01 |
| loss_197.0875     | : 0.03 | fragment_549.2475 | : 0.01 |
| fragment_595.2525 | : 0.02 | fragment_275.1425 | : 0.01 |
| fragment_325.1775 | : 0.02 | fragment_312.1675 | : 0.01 |
| fragment_283.1675 | : 0.02 | fragment_354.1775 | : 0.01 |
| loss_137.0675     | : 0.02 | fragment_395.1875 | : 0.01 |
| fragment_265.1575 | : 0.02 | fragment_415.1925 | : 0.01 |
| fragment_637.2625 | : 0.02 | fragment_433.2025 | : 0.01 |
| fragment_697.2875 | : 0.02 | fragment_774.3325 | : 0.01 |
| fragment_493.2225 | : 0.02 | fragment_431.2075 | : 0.01 |
| fragment_371.1825 | : 0.02 | fragment_371.1875 | : 0.01 |
| fragment_577.2425 | : 0.02 | fragment_343.1925 | : 0.01 |
| fragment_536.2375 | : 0.01 | fragment_476.2175 | : 0.01 |

motif\_650

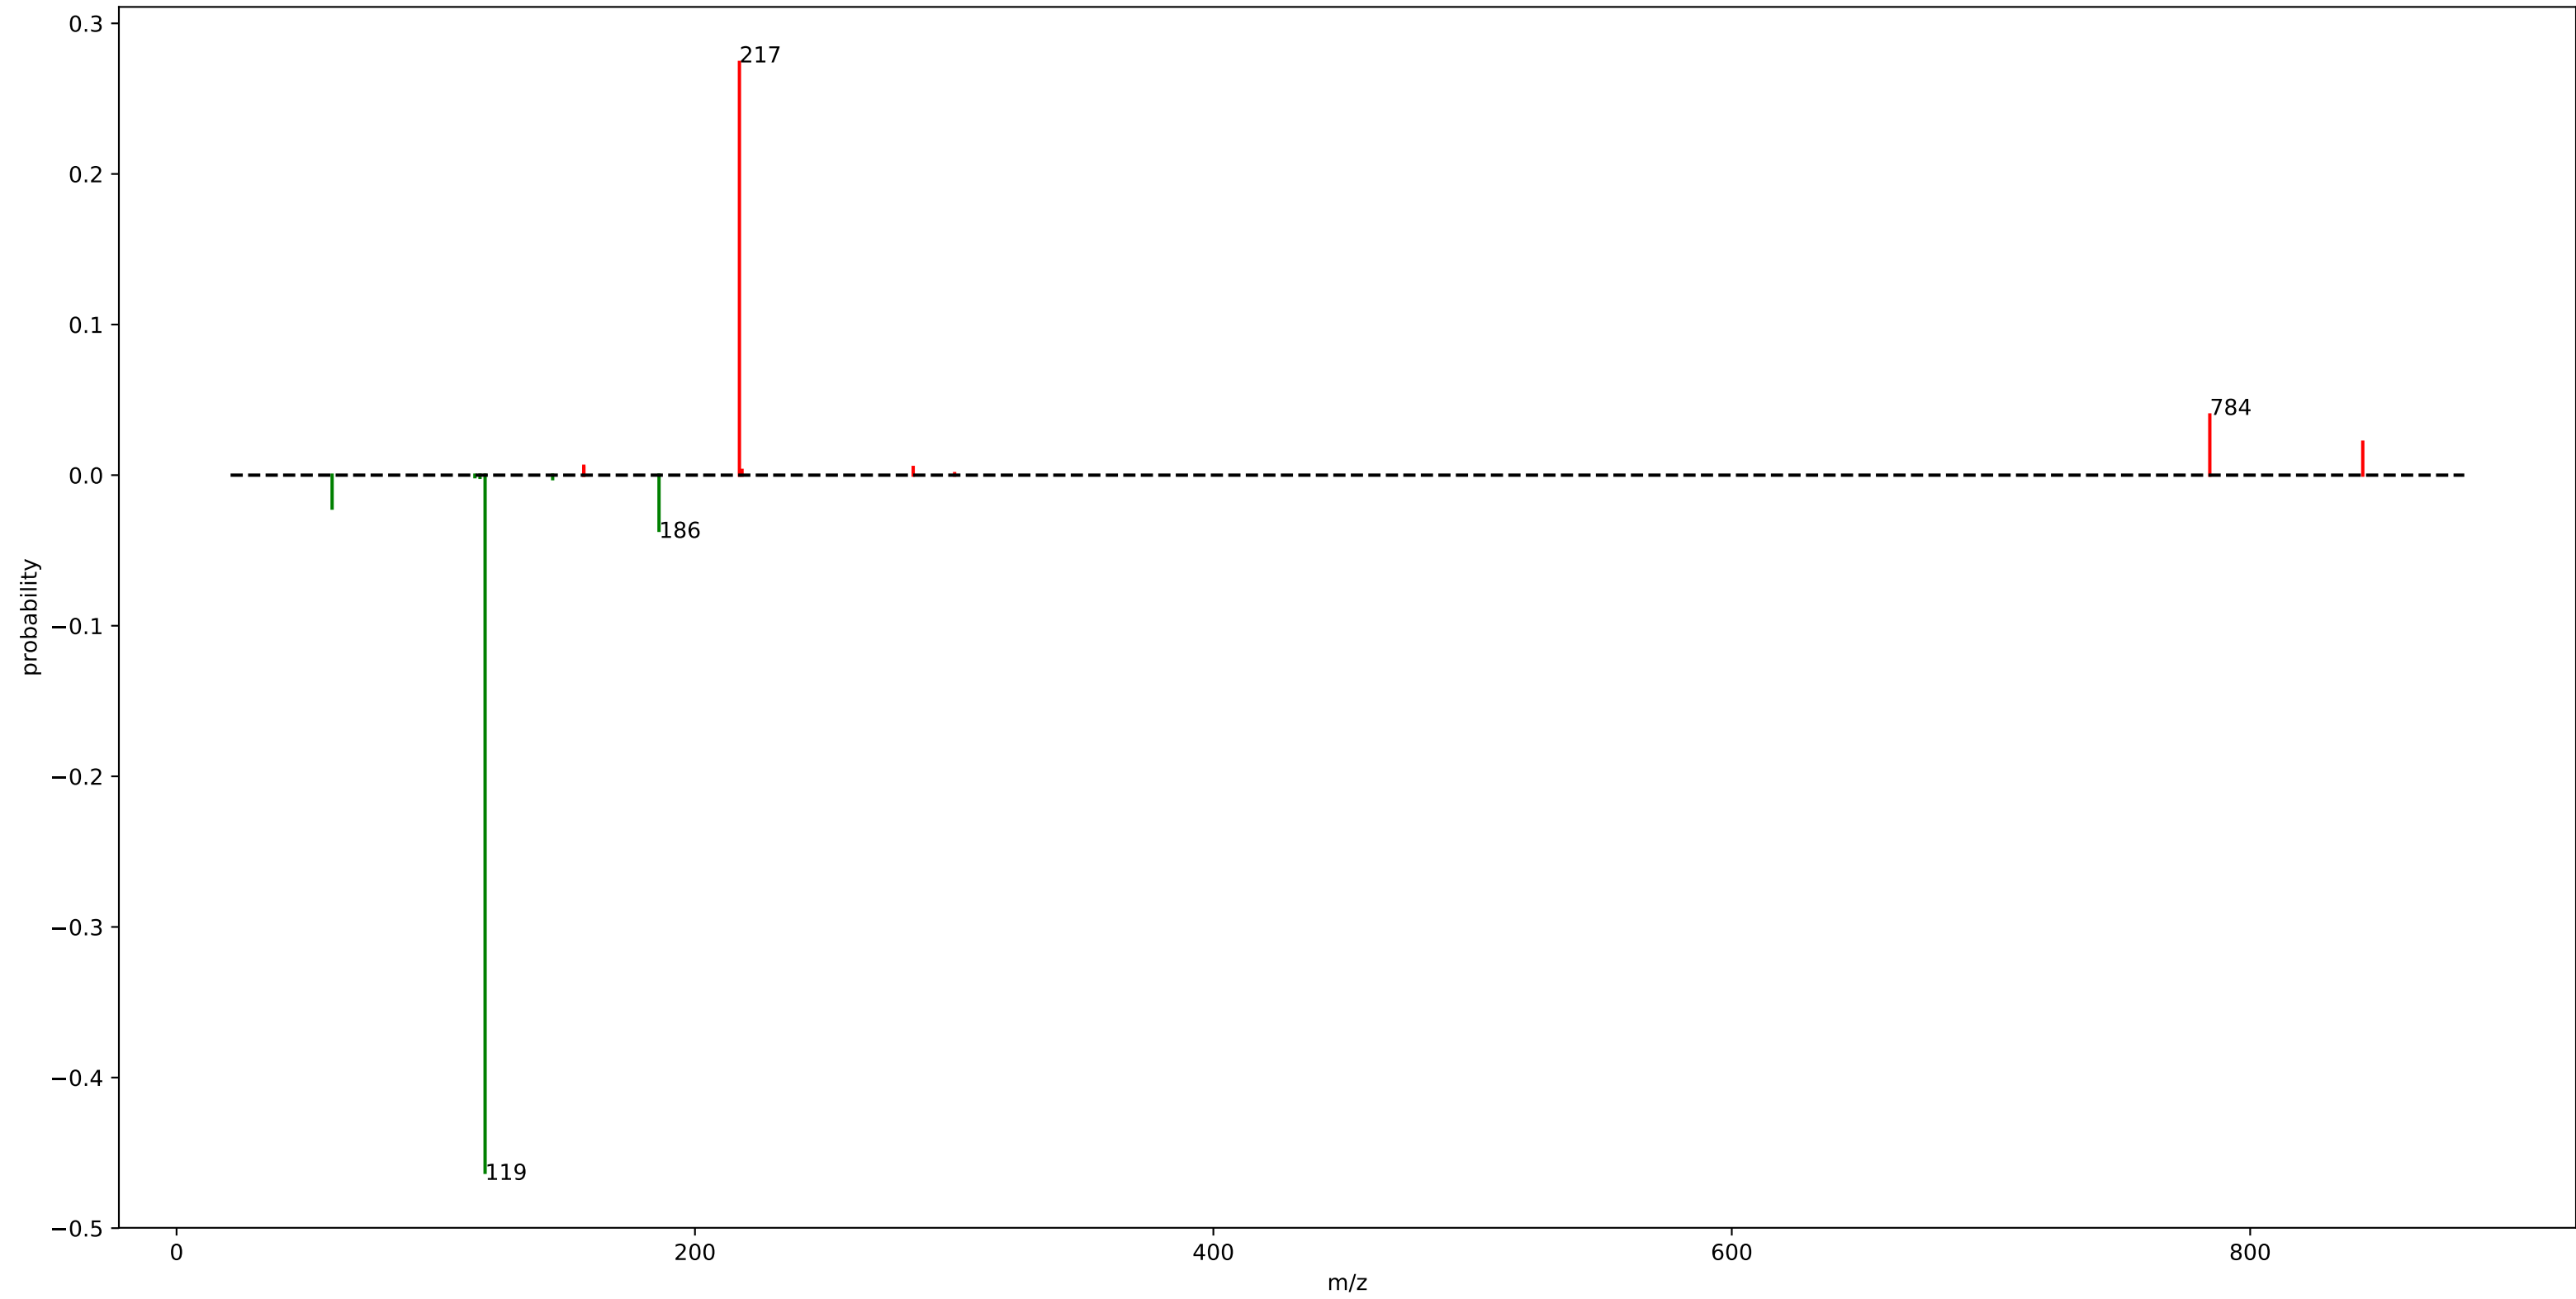

## motif\_650

|                   |        |
|-------------------|--------|
| loss_119.0325     | : 0.46 |
| fragment_217.1525 | : 0.27 |
| fragment_784.4225 | : 0.04 |
| loss_186.1325     | : 0.04 |
| loss_60.0125      | : 0.02 |
| fragment_843.4375 | : 0.02 |
| fragment_157.1125 | : 0.01 |
| fragment_284.1975 | : 0.01 |



motif\_651

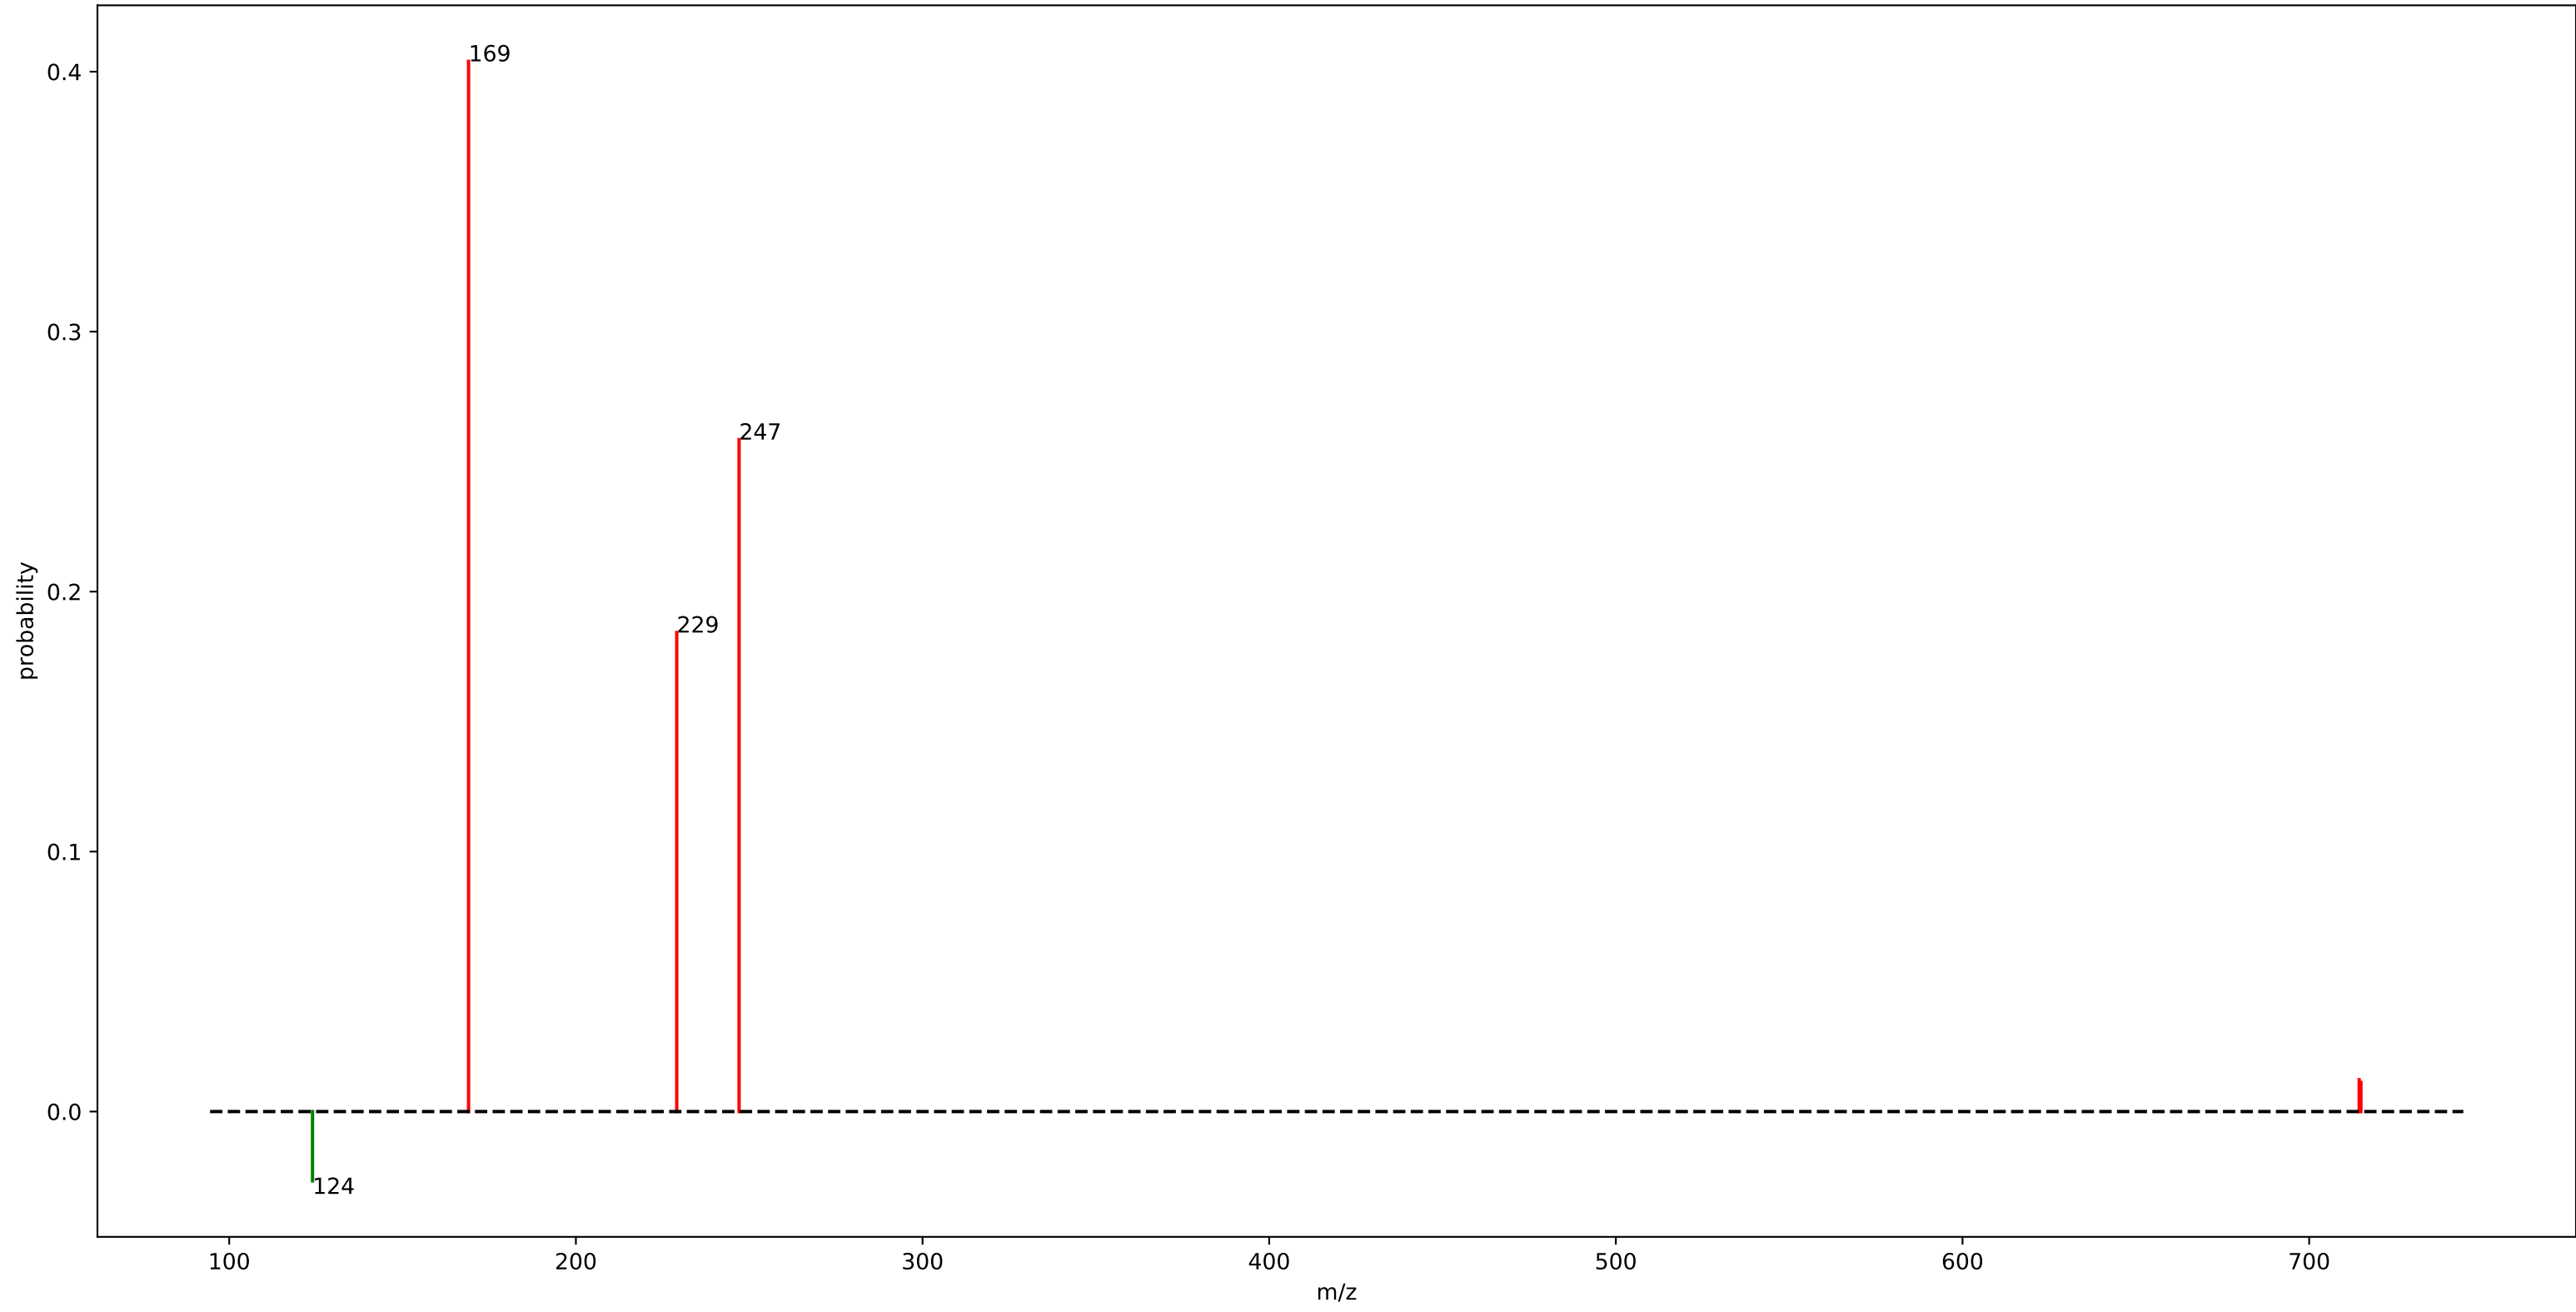

## motif\_651

|                   |        |
|-------------------|--------|
| fragment_169.0475 | : 0.40 |
| fragment_247.0825 | : 0.26 |
| fragment_229.0975 | : 0.18 |
| loss_124.0325     | : 0.03 |
| fragment_714.4275 | : 0.01 |
| fragment_714.9275 | : 0.01 |

motif\_652

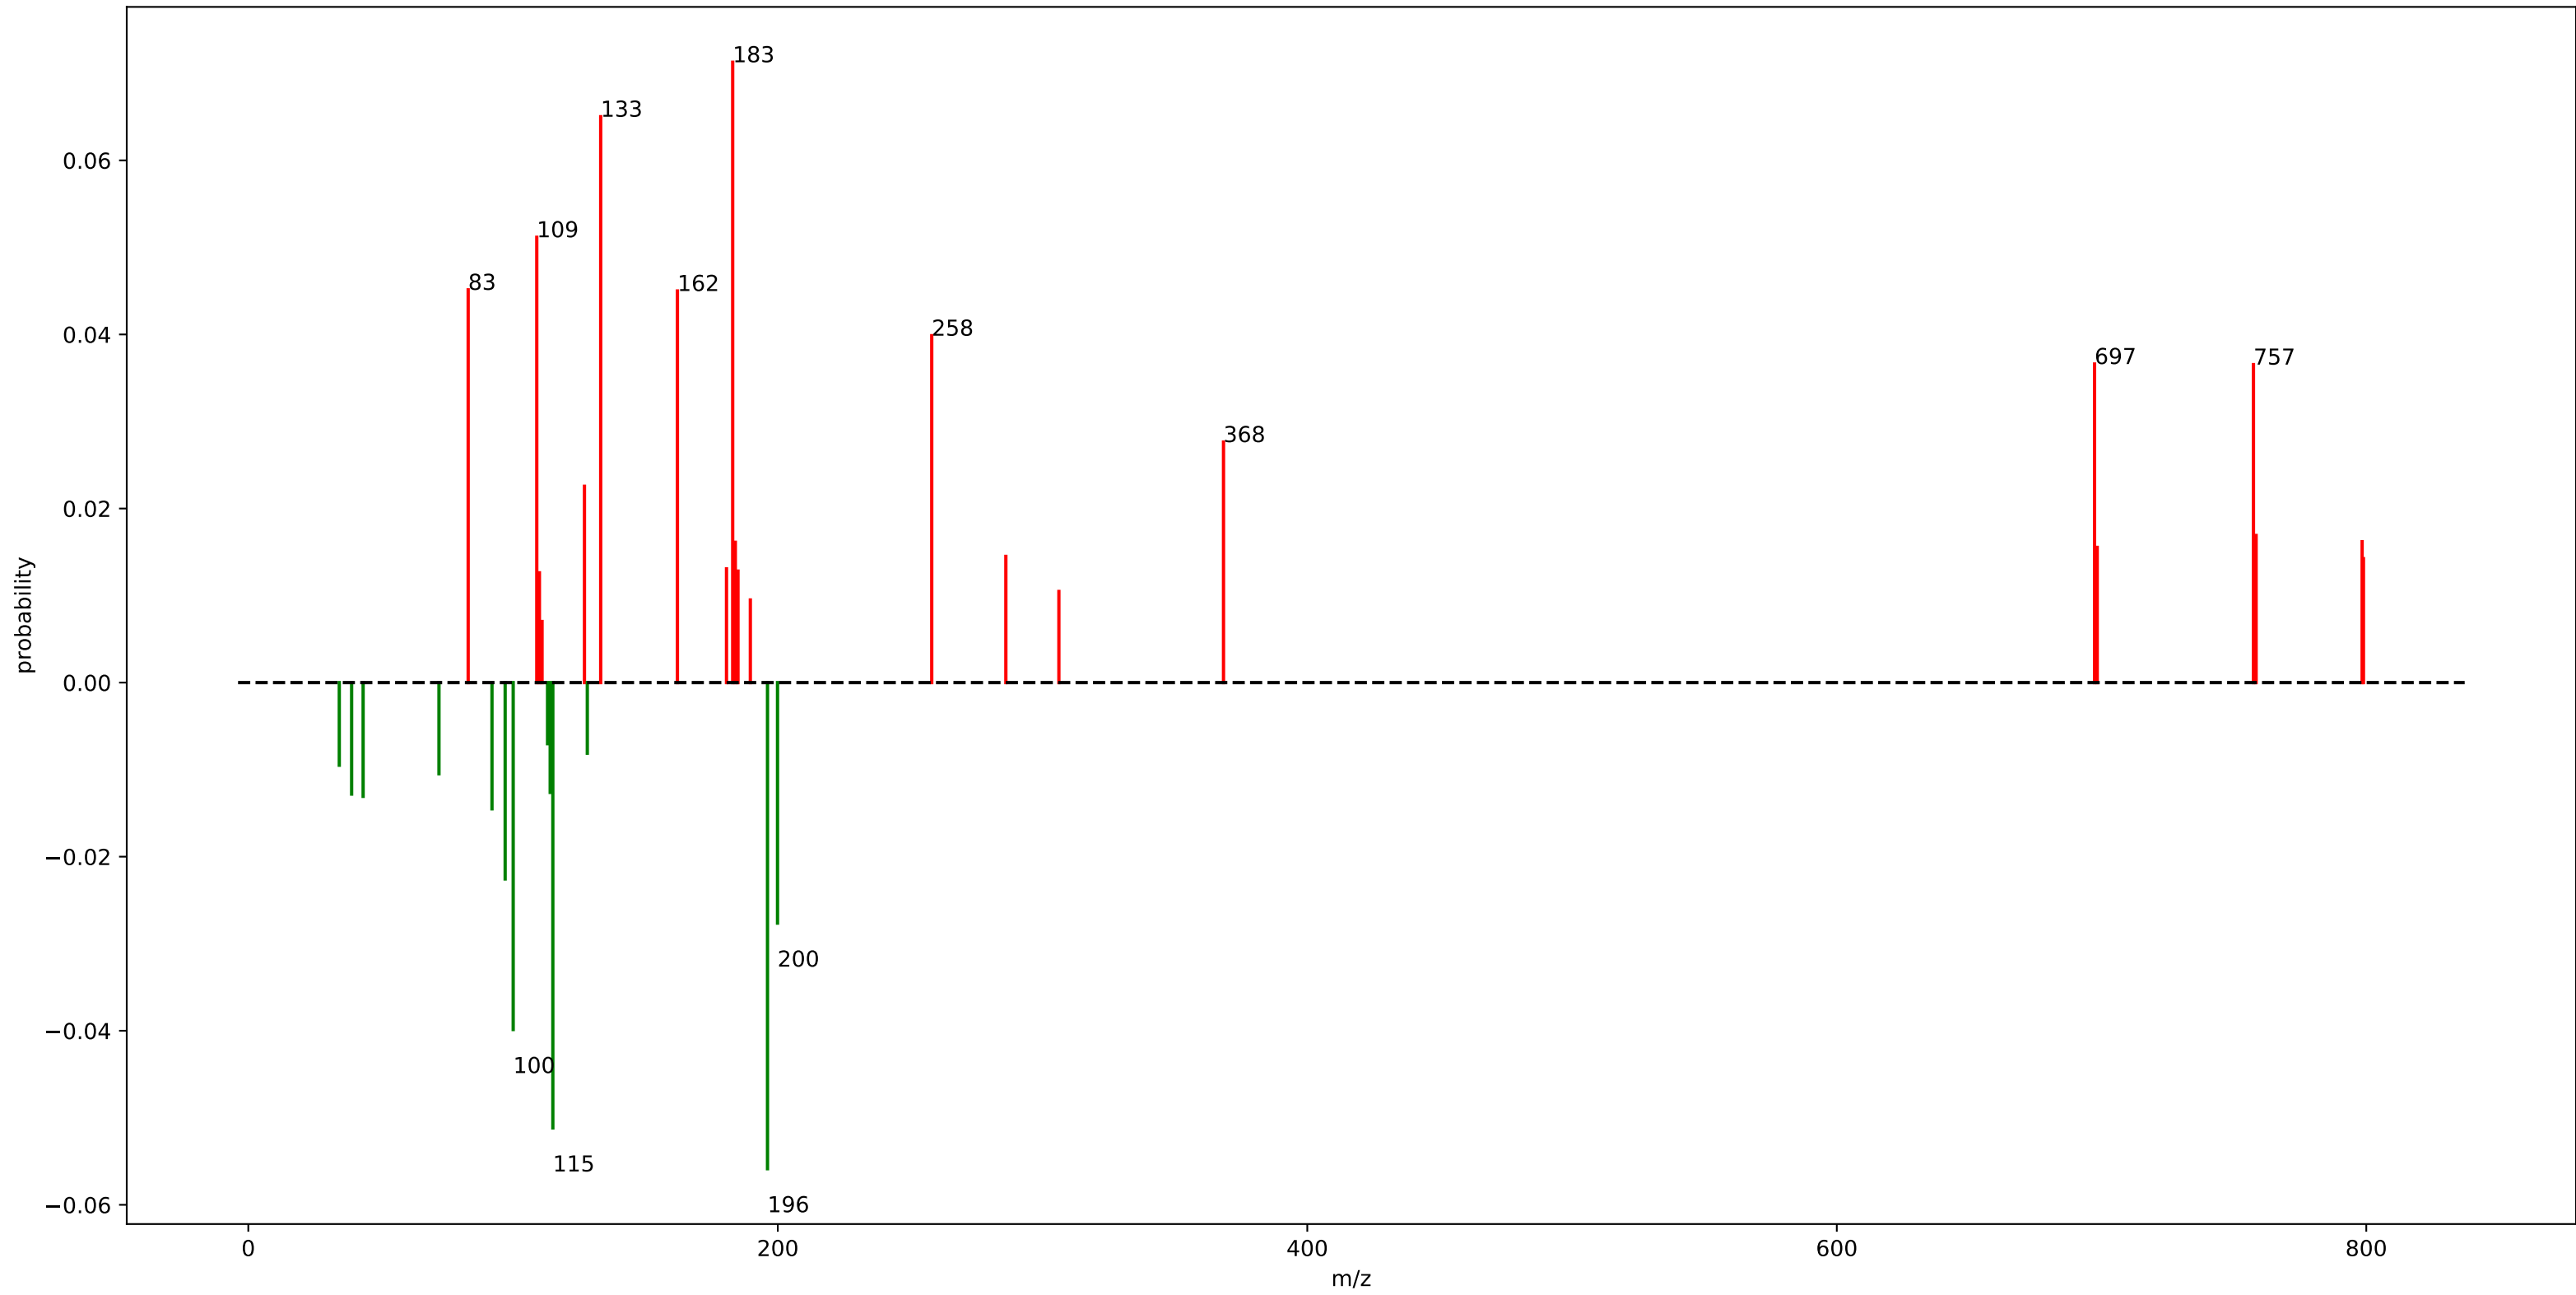

## motif\_652

|                   |        |                   |        |
|-------------------|--------|-------------------|--------|
| fragment_182.9625 | : 0.07 | fragment_286.1425 | : 0.01 |
| fragment_133.1025 | : 0.07 | fragment_798.9325 | : 0.01 |
| loss_196.1075     | : 0.06 | loss_43.3675      | : 0.01 |
| fragment_108.9625 | : 0.05 | fragment_180.6225 | : 0.01 |
| loss_115.0275     | : 0.05 | loss_39.0275      | : 0.01 |
| fragment_83.0475  | : 0.05 | fragment_184.9625 | : 0.01 |
| fragment_162.0875 | : 0.04 | fragment_109.9625 | : 0.01 |
| fragment_258.1475 | : 0.04 | loss_114.0275     | : 0.01 |
| loss_100.0525     | : 0.04 | loss_72.0175      | : 0.01 |
| fragment_697.3625 | : 0.04 | fragment_306.1725 | : 0.01 |
| fragment_757.3875 | : 0.04 | loss_34.3625      | : 0.01 |
| fragment_368.3525 | : 0.03 | fragment_189.6275 | : 0.01 |
| loss_199.8925     | : 0.03 | loss_128.0475     | : 0.01 |
| fragment_126.9725 | : 0.02 | loss_113.0275     | : 0.01 |
| loss_97.0175      | : 0.02 | fragment_110.9575 | : 0.01 |
| fragment_758.3875 | : 0.02 |                   |        |
| fragment_798.4325 | : 0.02 |                   |        |
| fragment_183.9625 | : 0.02 |                   |        |
| fragment_698.3675 | : 0.02 |                   |        |
| loss_92.0425      | : 0.01 |                   |        |

motif\_653

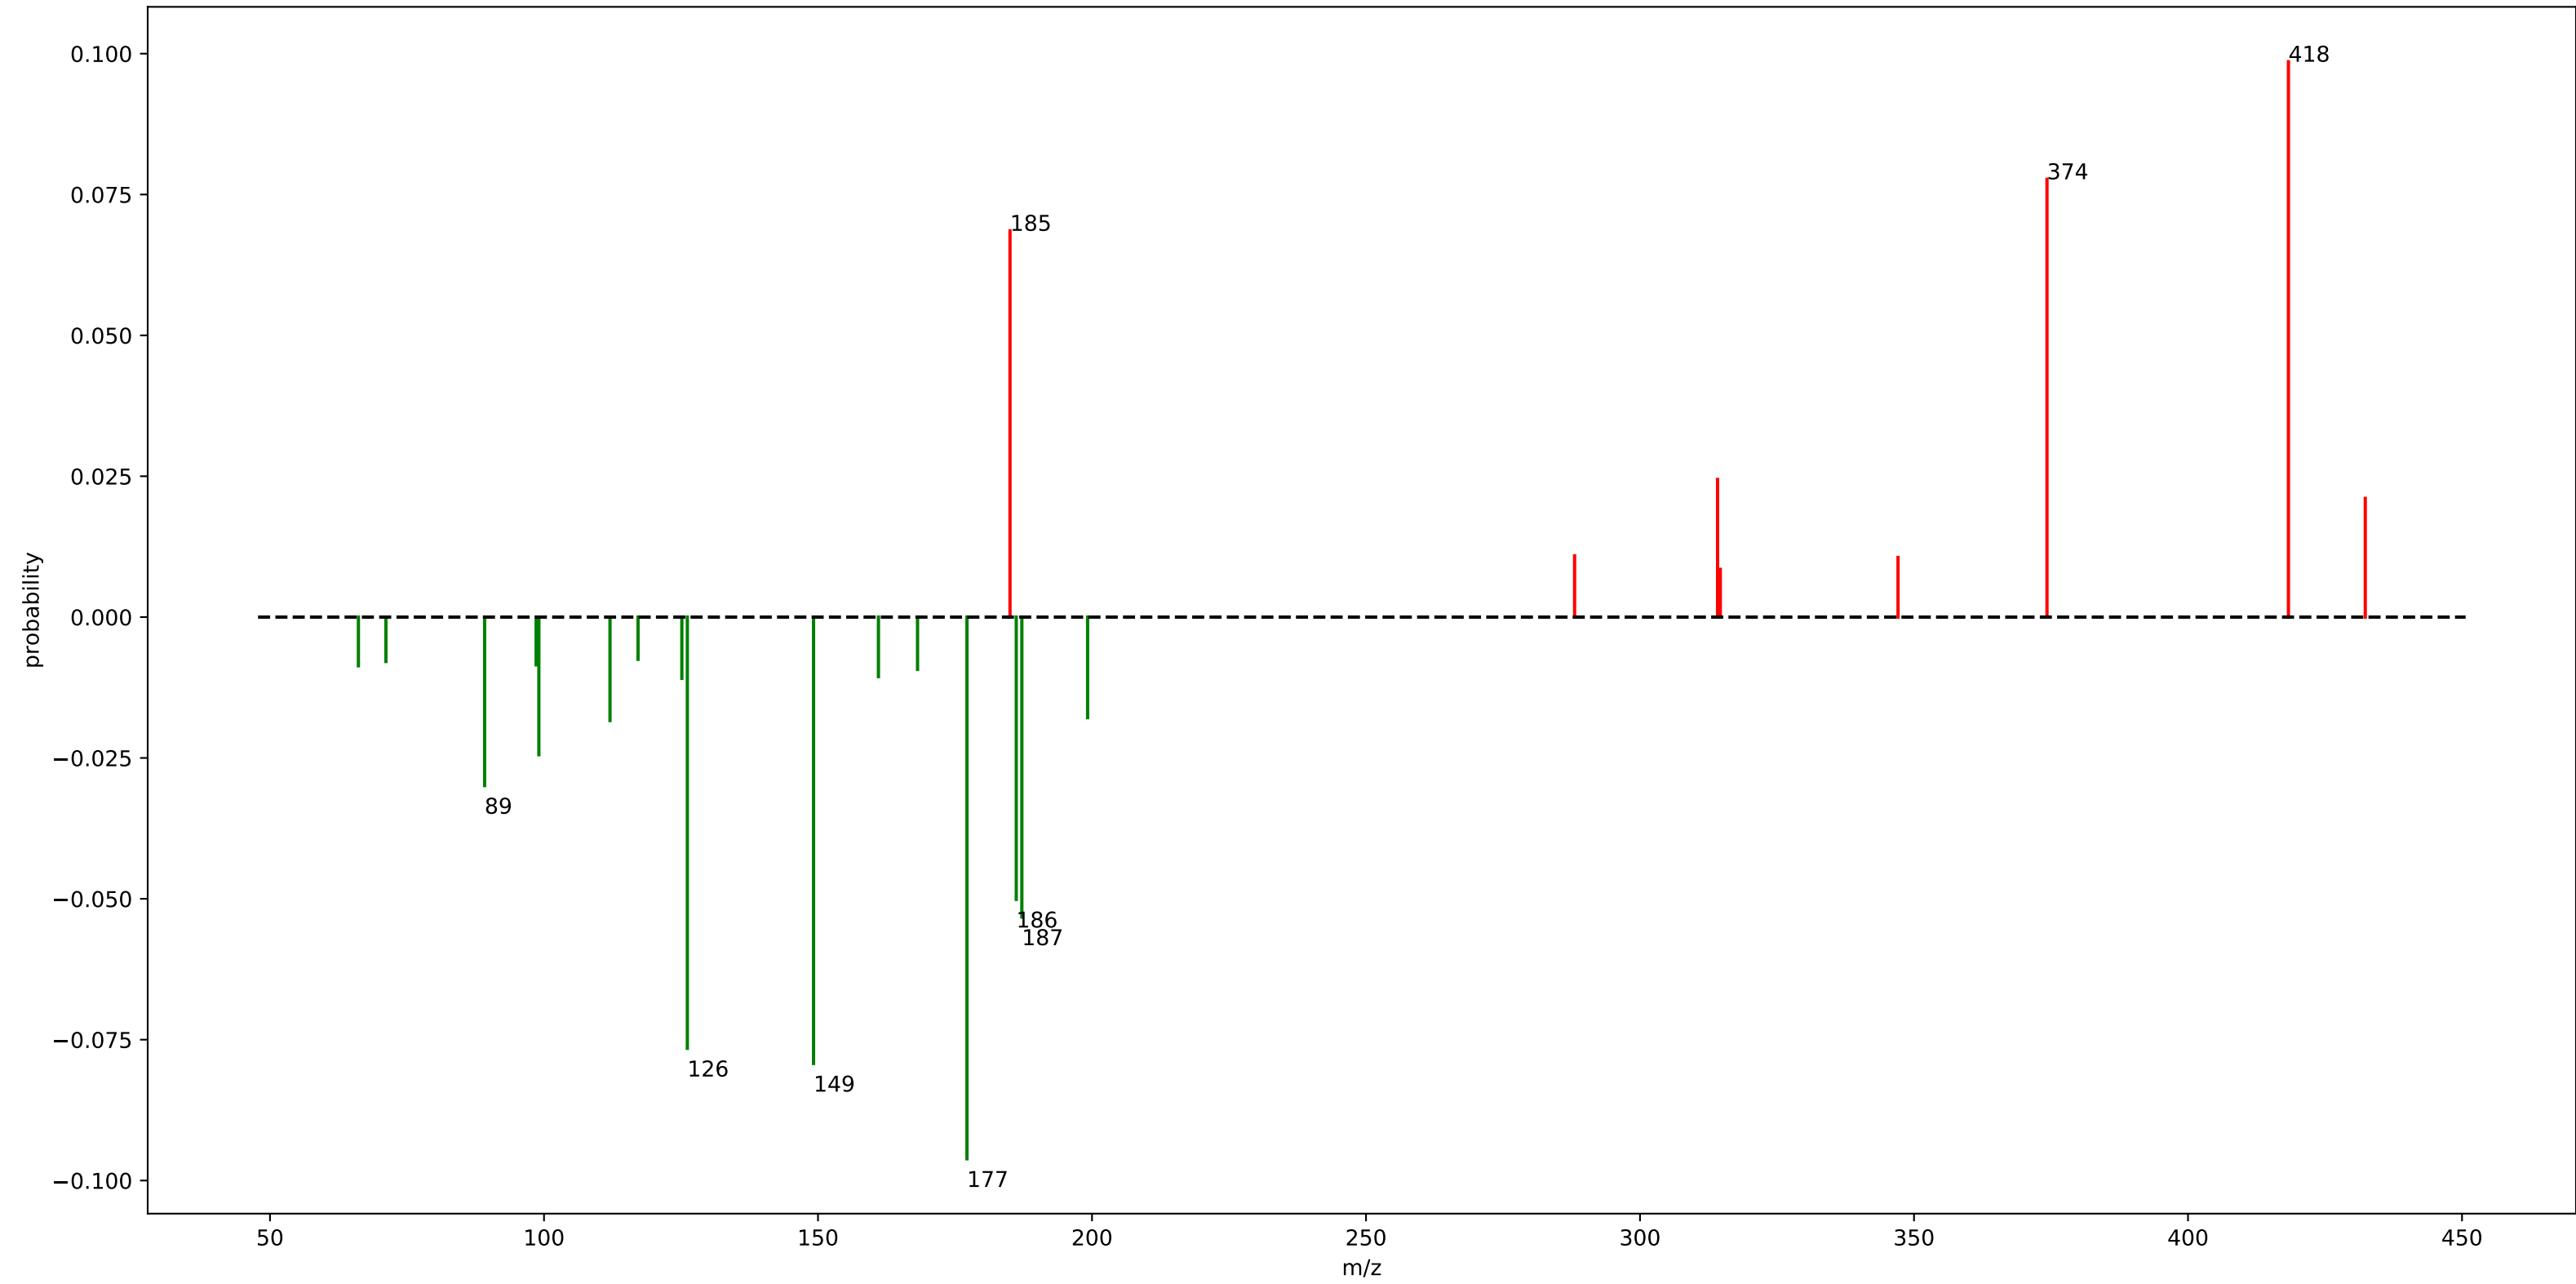

## motif\_653

|                   |        |                   |        |
|-------------------|--------|-------------------|--------|
| fragment_418.3275 | : 0.10 | loss_98.5625      | : 0.01 |
| loss_177.1825     | : 0.10 | fragment_314.6525 | : 0.01 |
| loss_149.1875     | : 0.08 | loss_71.1525      | : 0.01 |
| fragment_374.2675 | : 0.08 | loss_117.1575     | : 0.01 |
| loss_126.1575     | : 0.08 |                   |        |
| fragment_185.0375 | : 0.07 |                   |        |
| loss_187.1975     | : 0.05 |                   |        |
| loss_186.1775     | : 0.05 |                   |        |
| loss_89.1625      | : 0.03 |                   |        |
| loss_99.0625      | : 0.02 |                   |        |
| fragment_314.1525 | : 0.02 |                   |        |
| fragment_432.3475 | : 0.02 |                   |        |
| loss_112.0425     | : 0.02 |                   |        |
| loss_199.1975     | : 0.02 |                   |        |
| loss_125.1525     | : 0.01 |                   |        |
| fragment_288.0625 | : 0.01 |                   |        |
| fragment_347.0825 | : 0.01 |                   |        |
| loss_161.0275     | : 0.01 |                   |        |
| loss_168.1625     | : 0.01 |                   |        |
| loss_66.1325      | : 0.01 |                   |        |

motif\_654

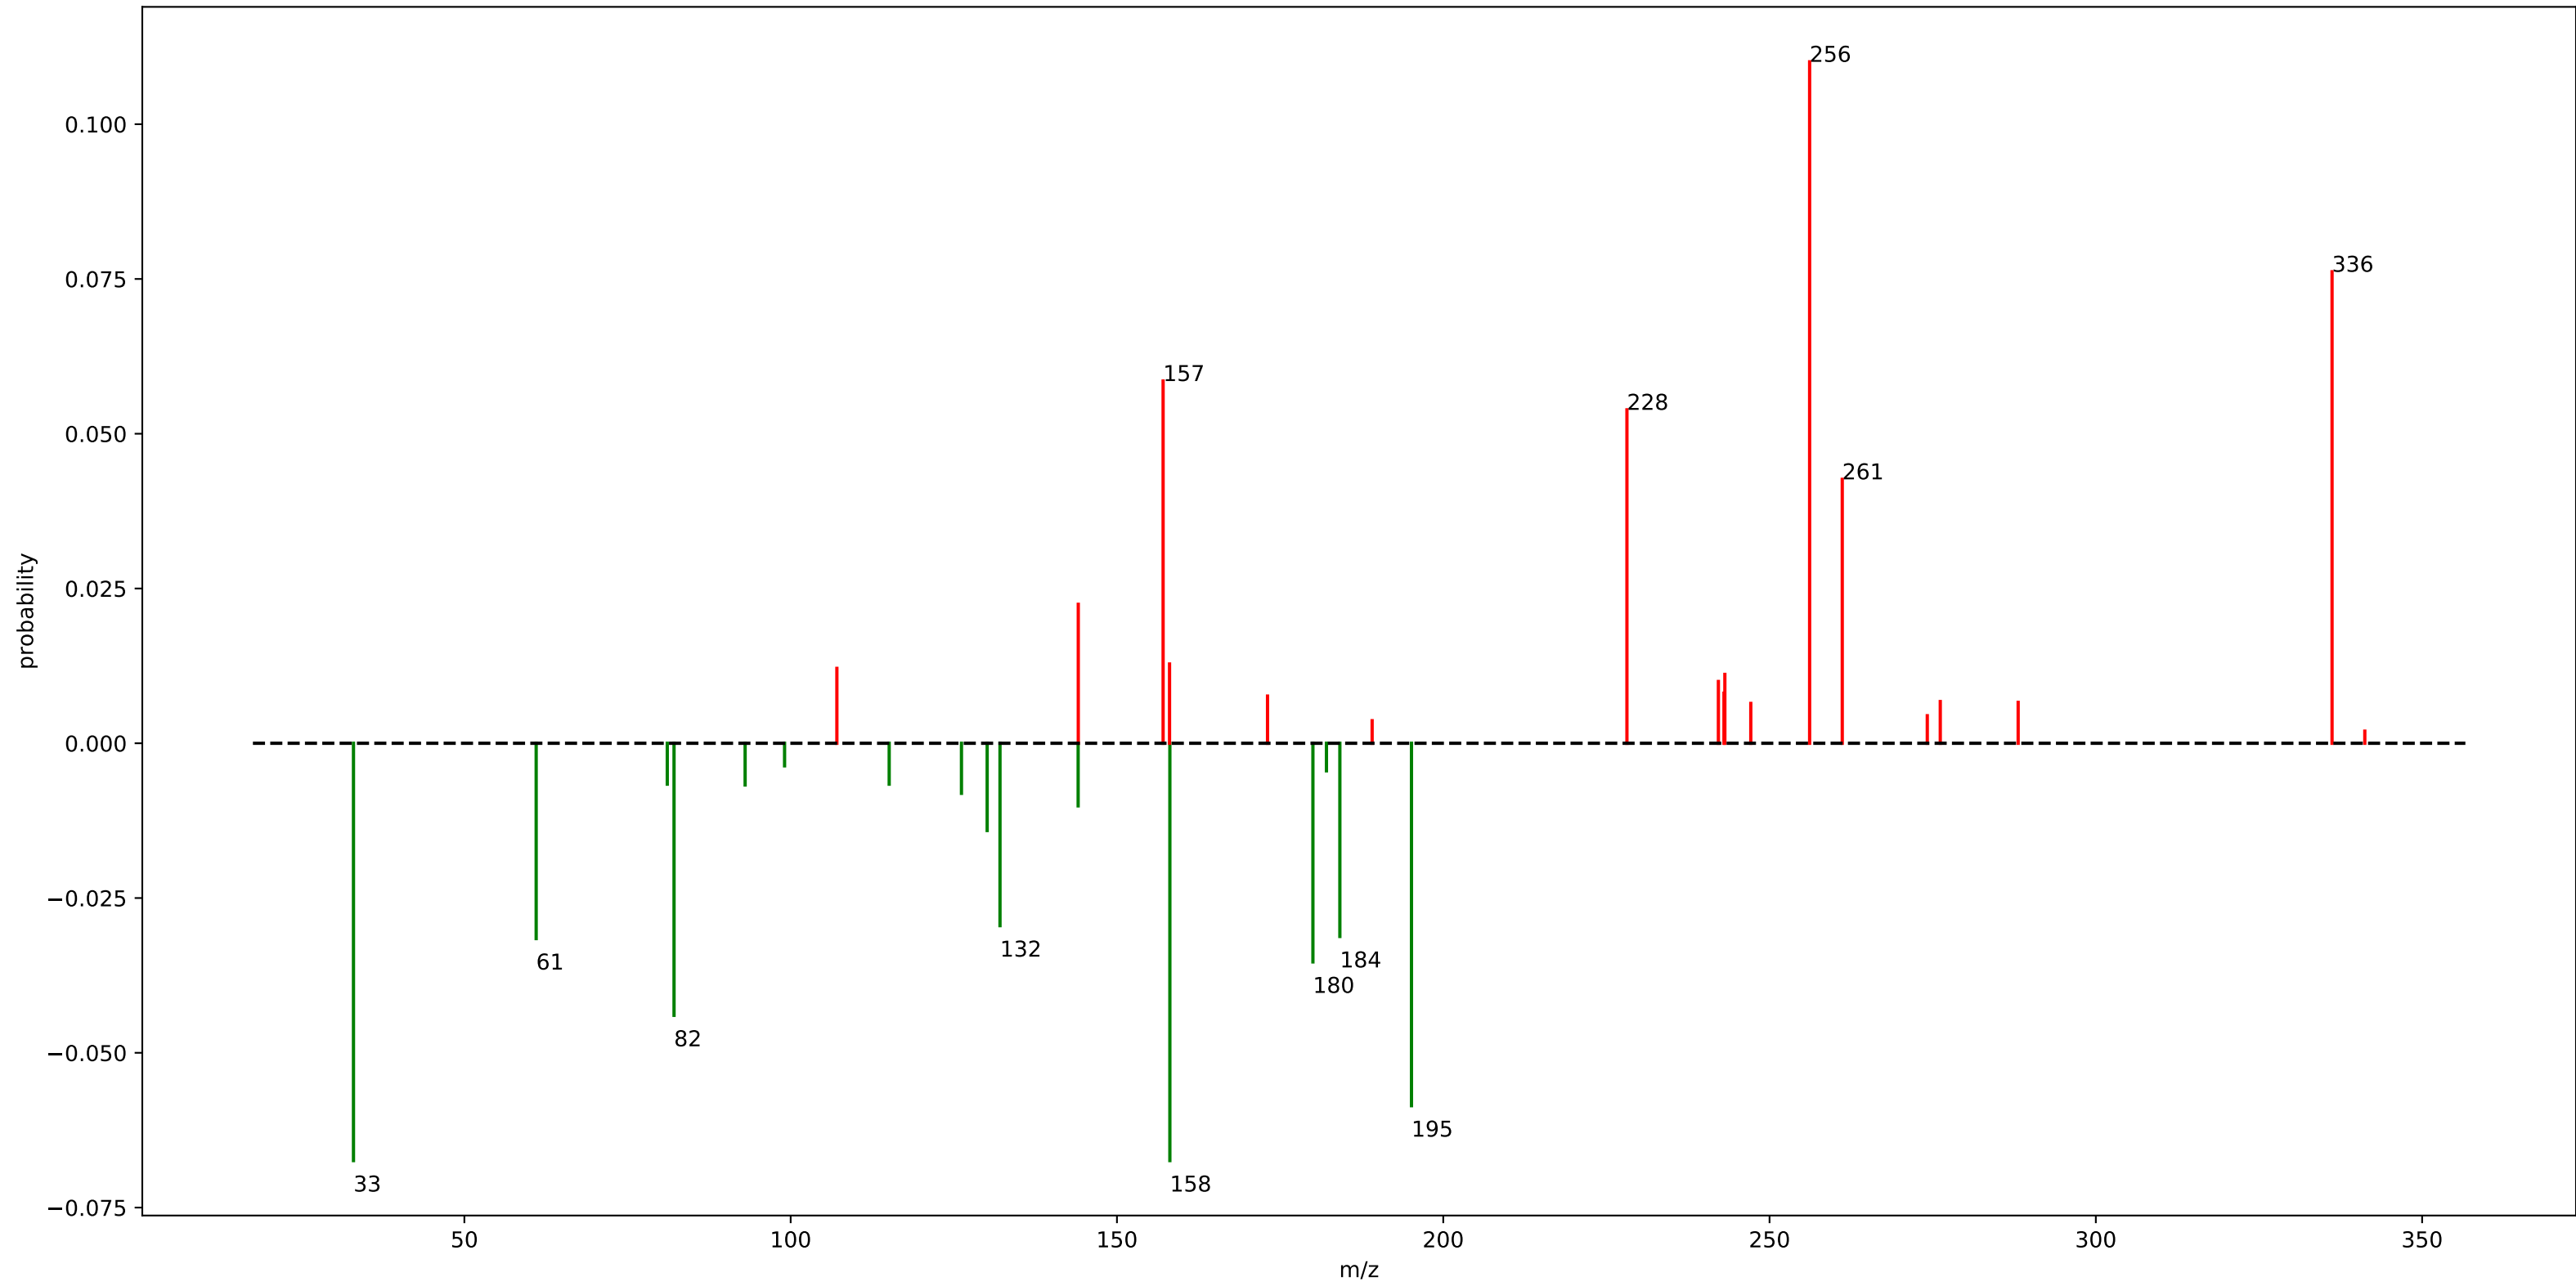

## motif\_654

|                   |        |                   |        |
|-------------------|--------|-------------------|--------|
| fragment_256.1425 | : 0.11 | loss_126.1725     | : 0.01 |
| fragment_336.1975 | : 0.08 | fragment_243.0175 | : 0.01 |
| loss_33.0075      | : 0.07 | fragment_173.0725 | : 0.01 |
| loss_158.1075     | : 0.07 | loss_93.0225      | : 0.01 |
| loss_195.1325     | : 0.06 | fragment_276.1625 | : 0.01 |
| fragment_157.0725 | : 0.06 | loss_115.0975     | : 0.01 |
| fragment_228.1475 | : 0.05 | fragment_288.0975 | : 0.01 |
| loss_82.1275      | : 0.04 | loss_81.0925      | : 0.01 |
| fragment_261.1425 | : 0.04 | fragment_247.1275 | : 0.01 |
| loss_180.0275     | : 0.04 |                   |        |
| loss_61.0025      | : 0.03 |                   |        |
| loss_184.1575     | : 0.03 |                   |        |
| loss_132.0775     | : 0.03 |                   |        |
| fragment_144.0725 | : 0.02 |                   |        |
| loss_130.1125     | : 0.01 |                   |        |
| fragment_158.0575 | : 0.01 |                   |        |
| fragment_107.0825 | : 0.01 |                   |        |
| fragment_243.1525 | : 0.01 |                   |        |
| loss_144.0525     | : 0.01 |                   |        |
| fragment_242.1625 | : 0.01 |                   |        |



motif\_655

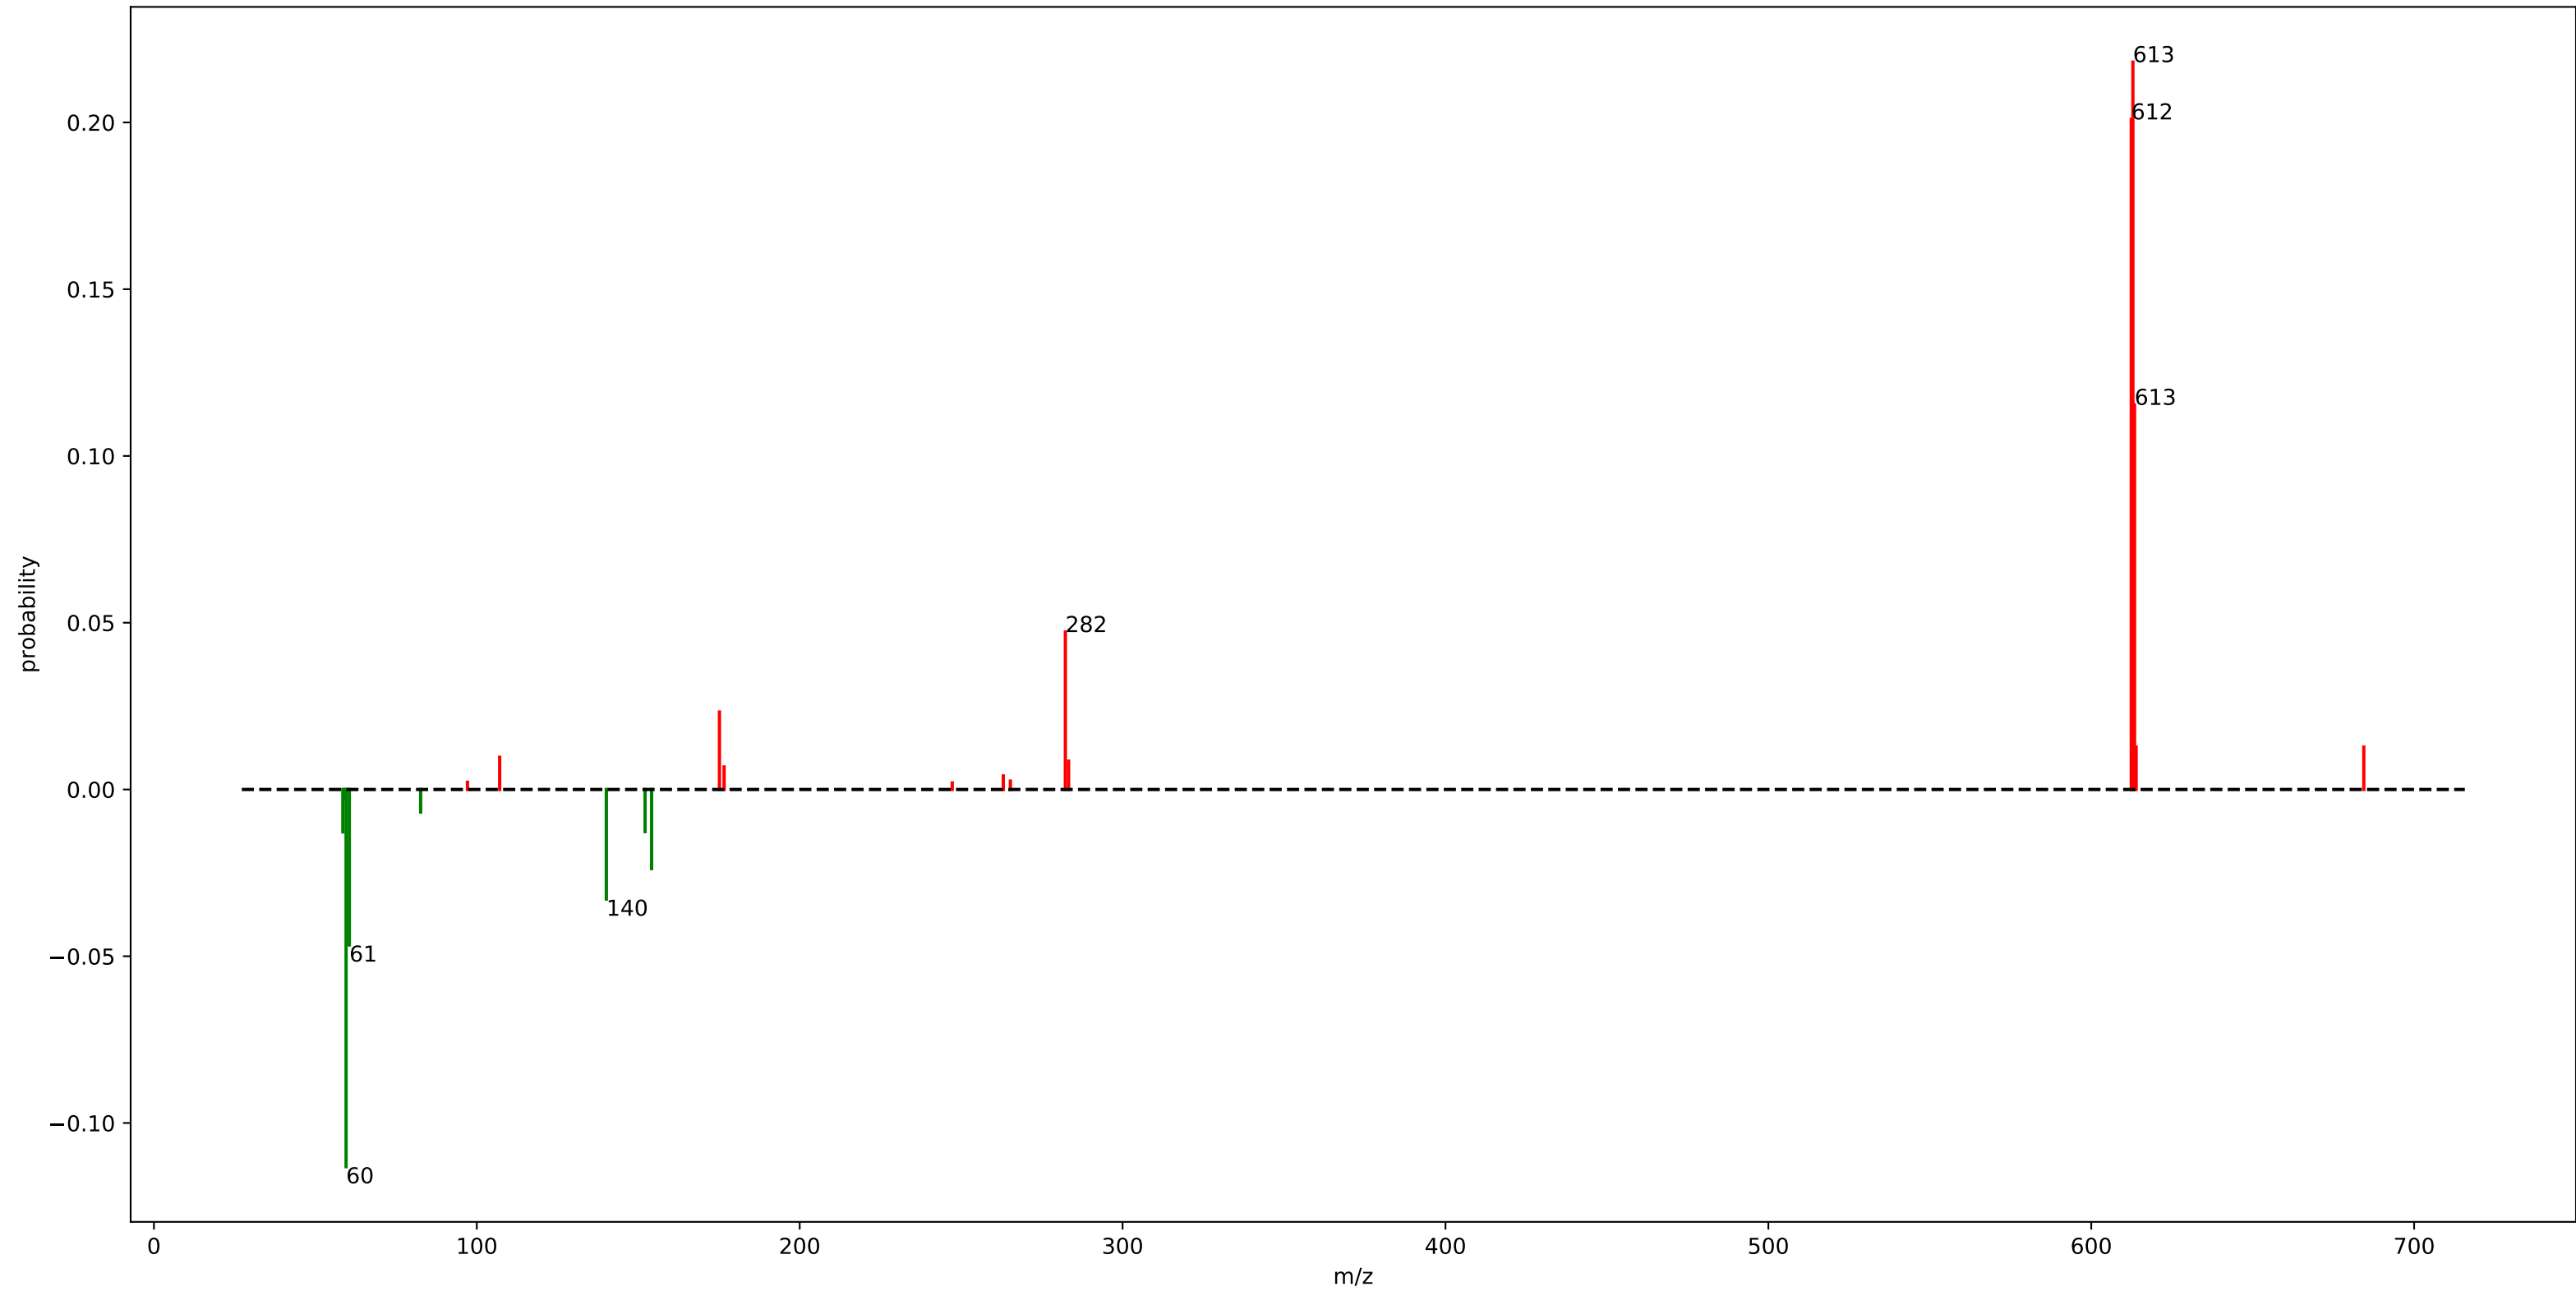

## motif\_655

|                   |        |
|-------------------|--------|
| fragment_612.8975 | : 0.22 |
| fragment_612.3975 | : 0.20 |
| fragment_613.3975 | : 0.12 |
| loss_59.5175      | : 0.11 |
| fragment_282.2775 | : 0.05 |
| loss_60.5175      | : 0.05 |
| loss_140.1175     | : 0.03 |
| loss_154.1375     | : 0.02 |
| fragment_175.1475 | : 0.02 |
| fragment_613.8975 | : 0.01 |
| loss_58.5125      | : 0.01 |
| fragment_684.4075 | : 0.01 |
| loss_152.1175     | : 0.01 |
| fragment_107.0825 | : 0.01 |
| fragment_283.2825 | : 0.01 |
| loss_82.6125      | : 0.01 |
| fragment_176.5925 | : 0.01 |

motif\_656

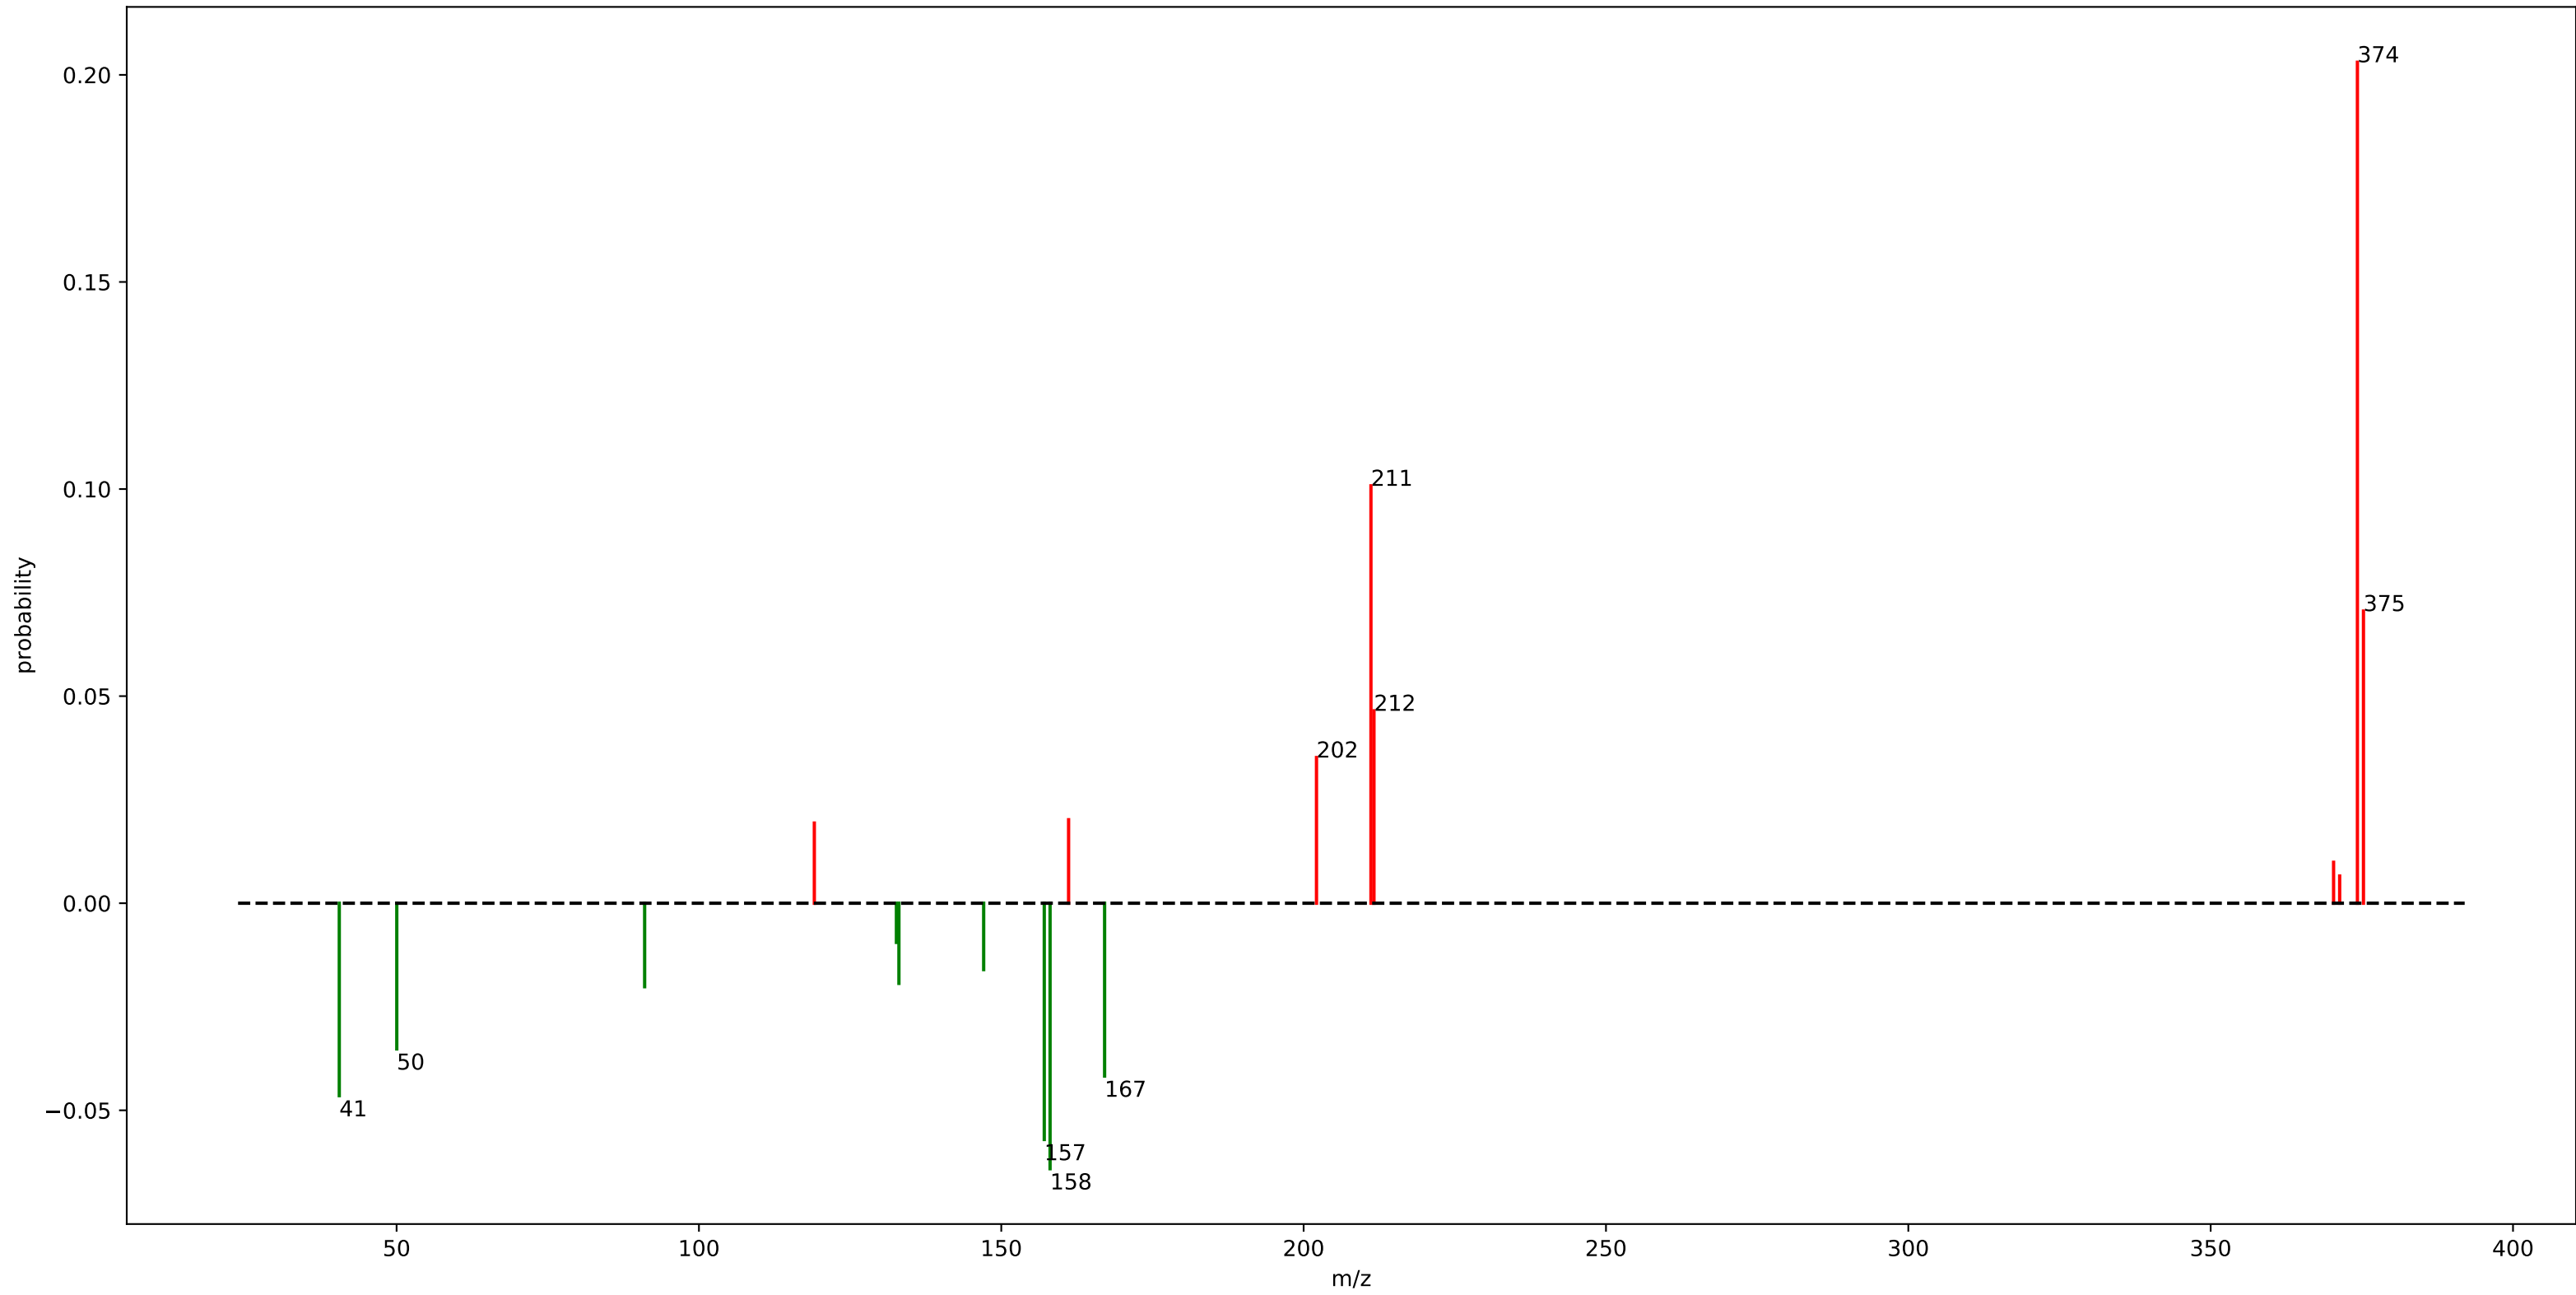

## motif\_656

|                   |        |
|-------------------|--------|
| fragment_374.2675 | : 0.20 |
| fragment_211.1325 | : 0.10 |
| fragment_375.2675 | : 0.07 |
| loss_158.0675     | : 0.06 |
| loss_157.1075     | : 0.06 |
| fragment_211.6325 | : 0.05 |
| loss_40.5225      | : 0.05 |
| loss_167.0875     | : 0.04 |
| loss_50.0325      | : 0.04 |
| fragment_202.1275 | : 0.04 |
| loss_91.0225      | : 0.02 |
| fragment_161.1325 | : 0.02 |
| fragment_119.0825 | : 0.02 |
| loss_133.0725     | : 0.02 |
| loss_147.0875     | : 0.02 |
| fragment_370.3275 | : 0.01 |
| loss_132.6575     | : 0.01 |
| fragment_371.3325 | : 0.01 |

motif\_657

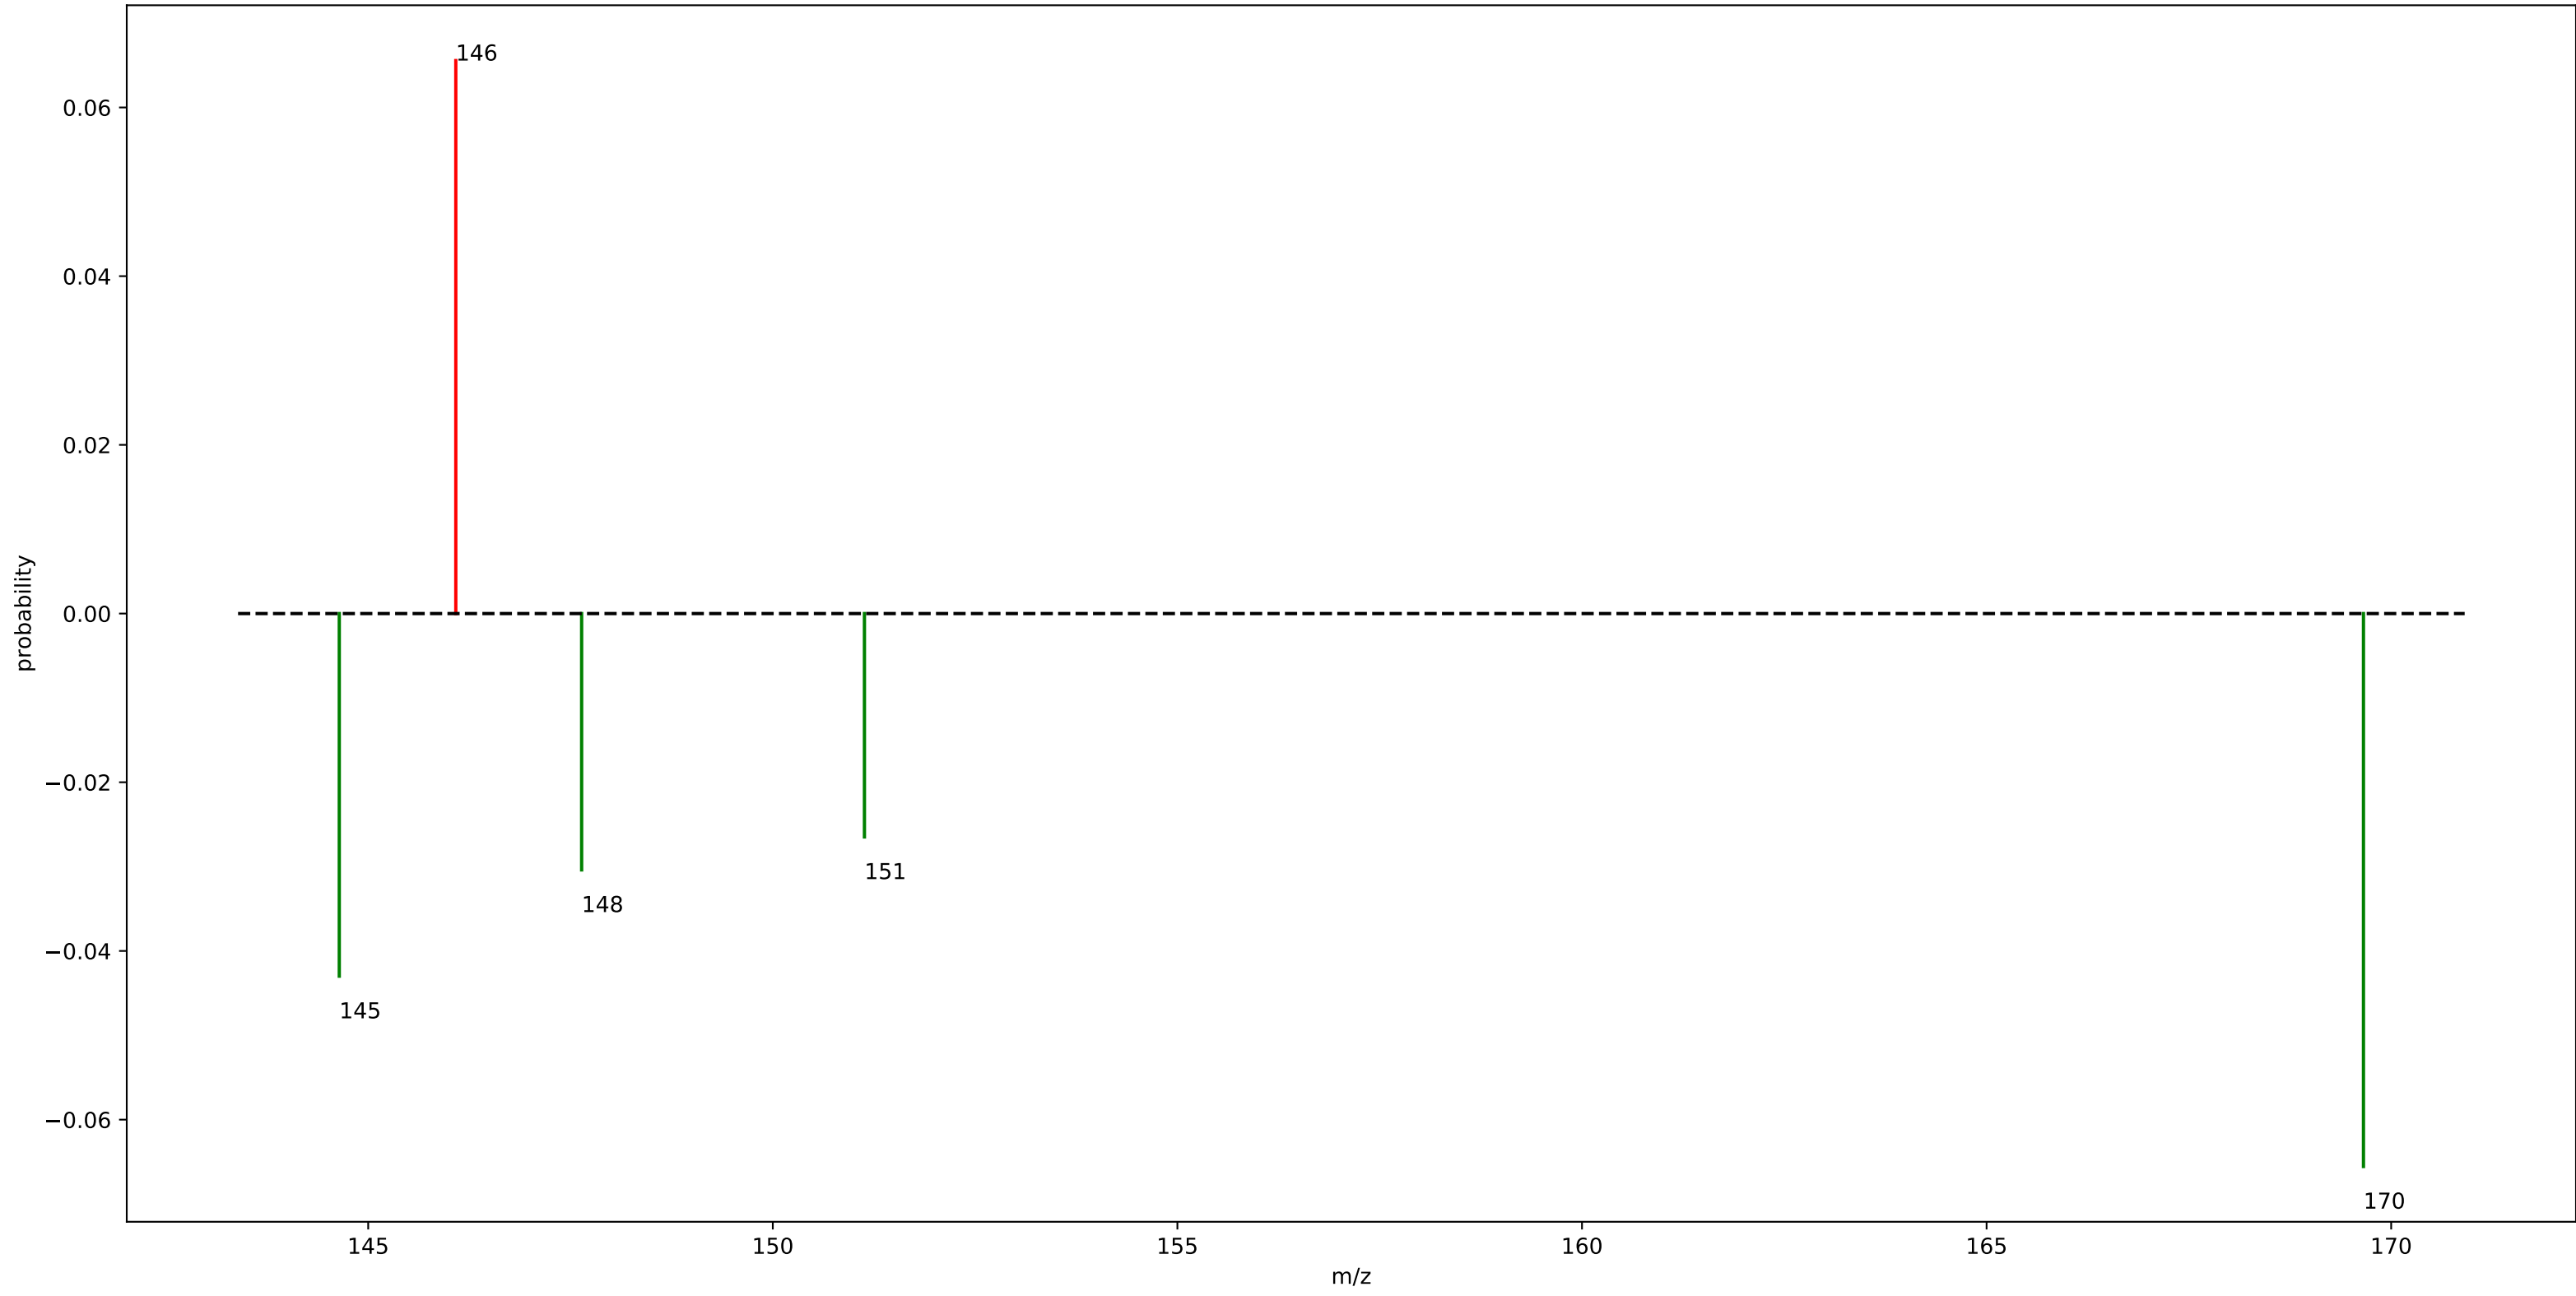

## motif\_657

|                   |        |
|-------------------|--------|
| fragment_146.0825 | : 0.07 |
| loss_169.6575     | : 0.07 |
| loss_144.6425     | : 0.04 |
| loss_147.6375     | : 0.03 |
| loss_151.1325     | : 0.03 |

motif\_658

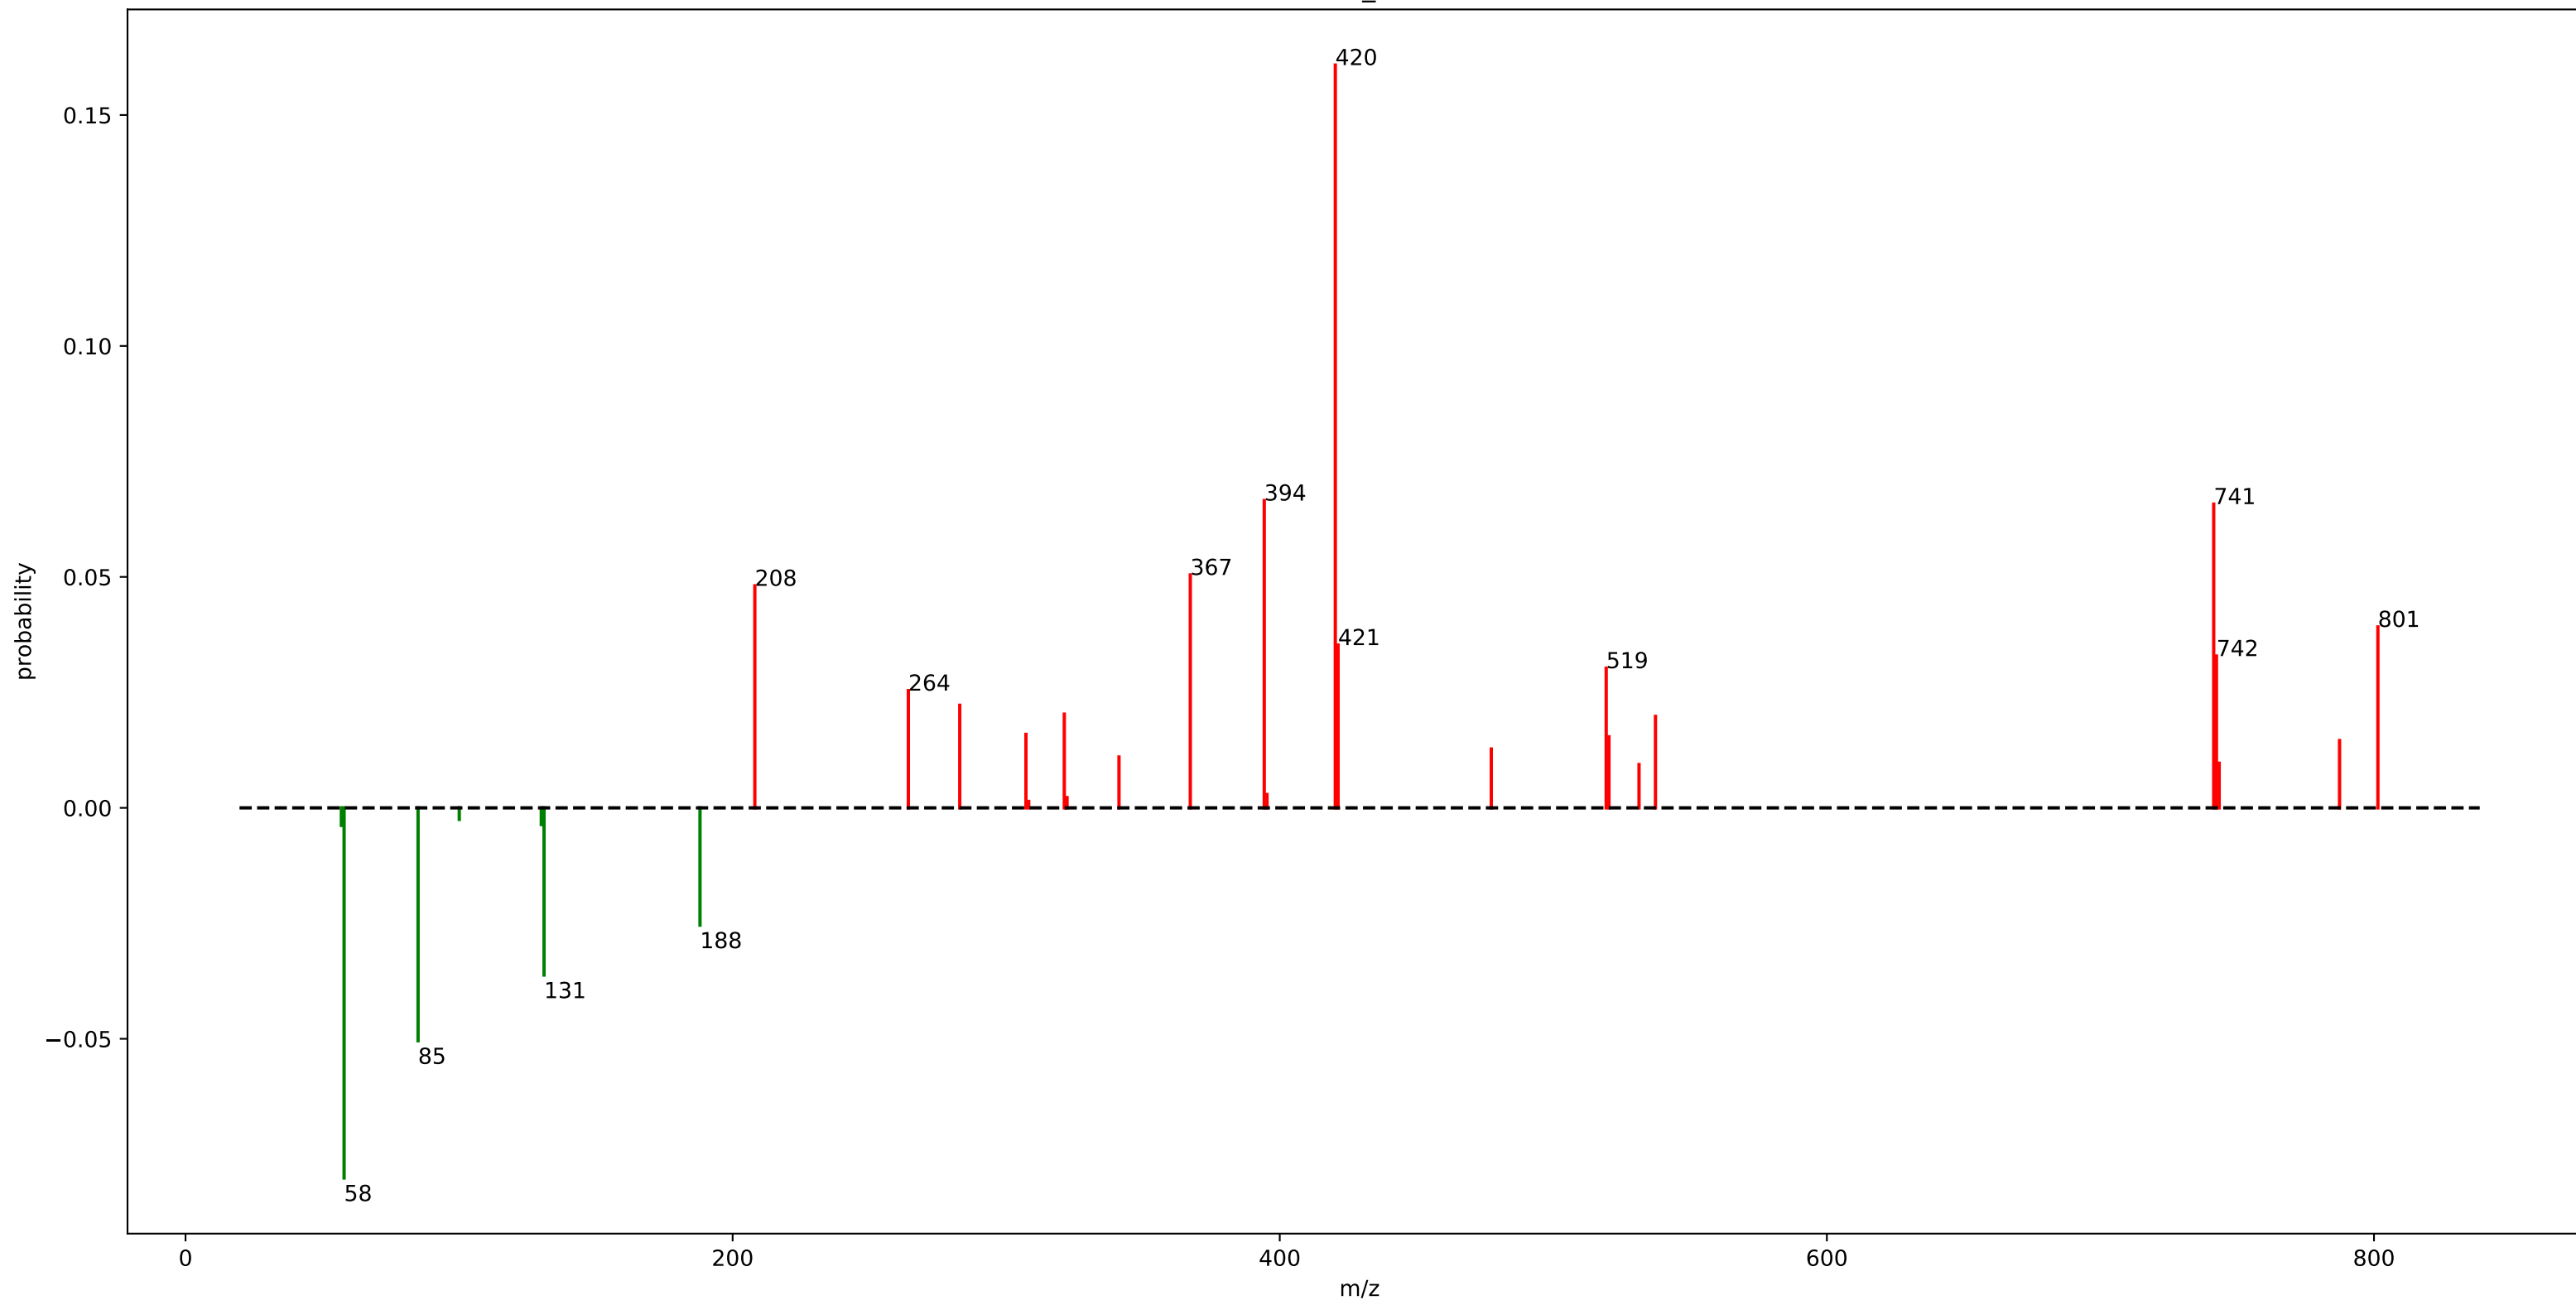

## motif\_658

|                   |        |                   |        |
|-------------------|--------|-------------------|--------|
| fragment_420.3075 | : 0.16 | fragment_477.3225 | : 0.01 |
| loss_57.9625      | : 0.08 | fragment_341.2325 | : 0.01 |
| fragment_394.3325 | : 0.07 | fragment_743.4075 | : 0.01 |
| fragment_741.4075 | : 0.07 | fragment_531.3325 | : 0.01 |
| loss_85.0025      | : 0.05 |                   |        |
| fragment_367.2975 | : 0.05 |                   |        |
| fragment_208.1125 | : 0.05 |                   |        |
| fragment_801.4275 | : 0.04 |                   |        |
| loss_131.0575     | : 0.04 |                   |        |
| fragment_421.3125 | : 0.04 |                   |        |
| fragment_742.4075 | : 0.03 |                   |        |
| fragment_519.3325 | : 0.03 |                   |        |
| fragment_264.2325 | : 0.03 |                   |        |
| loss_188.0675     | : 0.03 |                   |        |
| fragment_283.0175 | : 0.02 |                   |        |
| fragment_321.2375 | : 0.02 |                   |        |
| fragment_537.3425 | : 0.02 |                   |        |
| fragment_307.2225 | : 0.02 |                   |        |
| fragment_520.3375 | : 0.02 |                   |        |
| fragment_787.4125 | : 0.01 |                   |        |



motif\_659

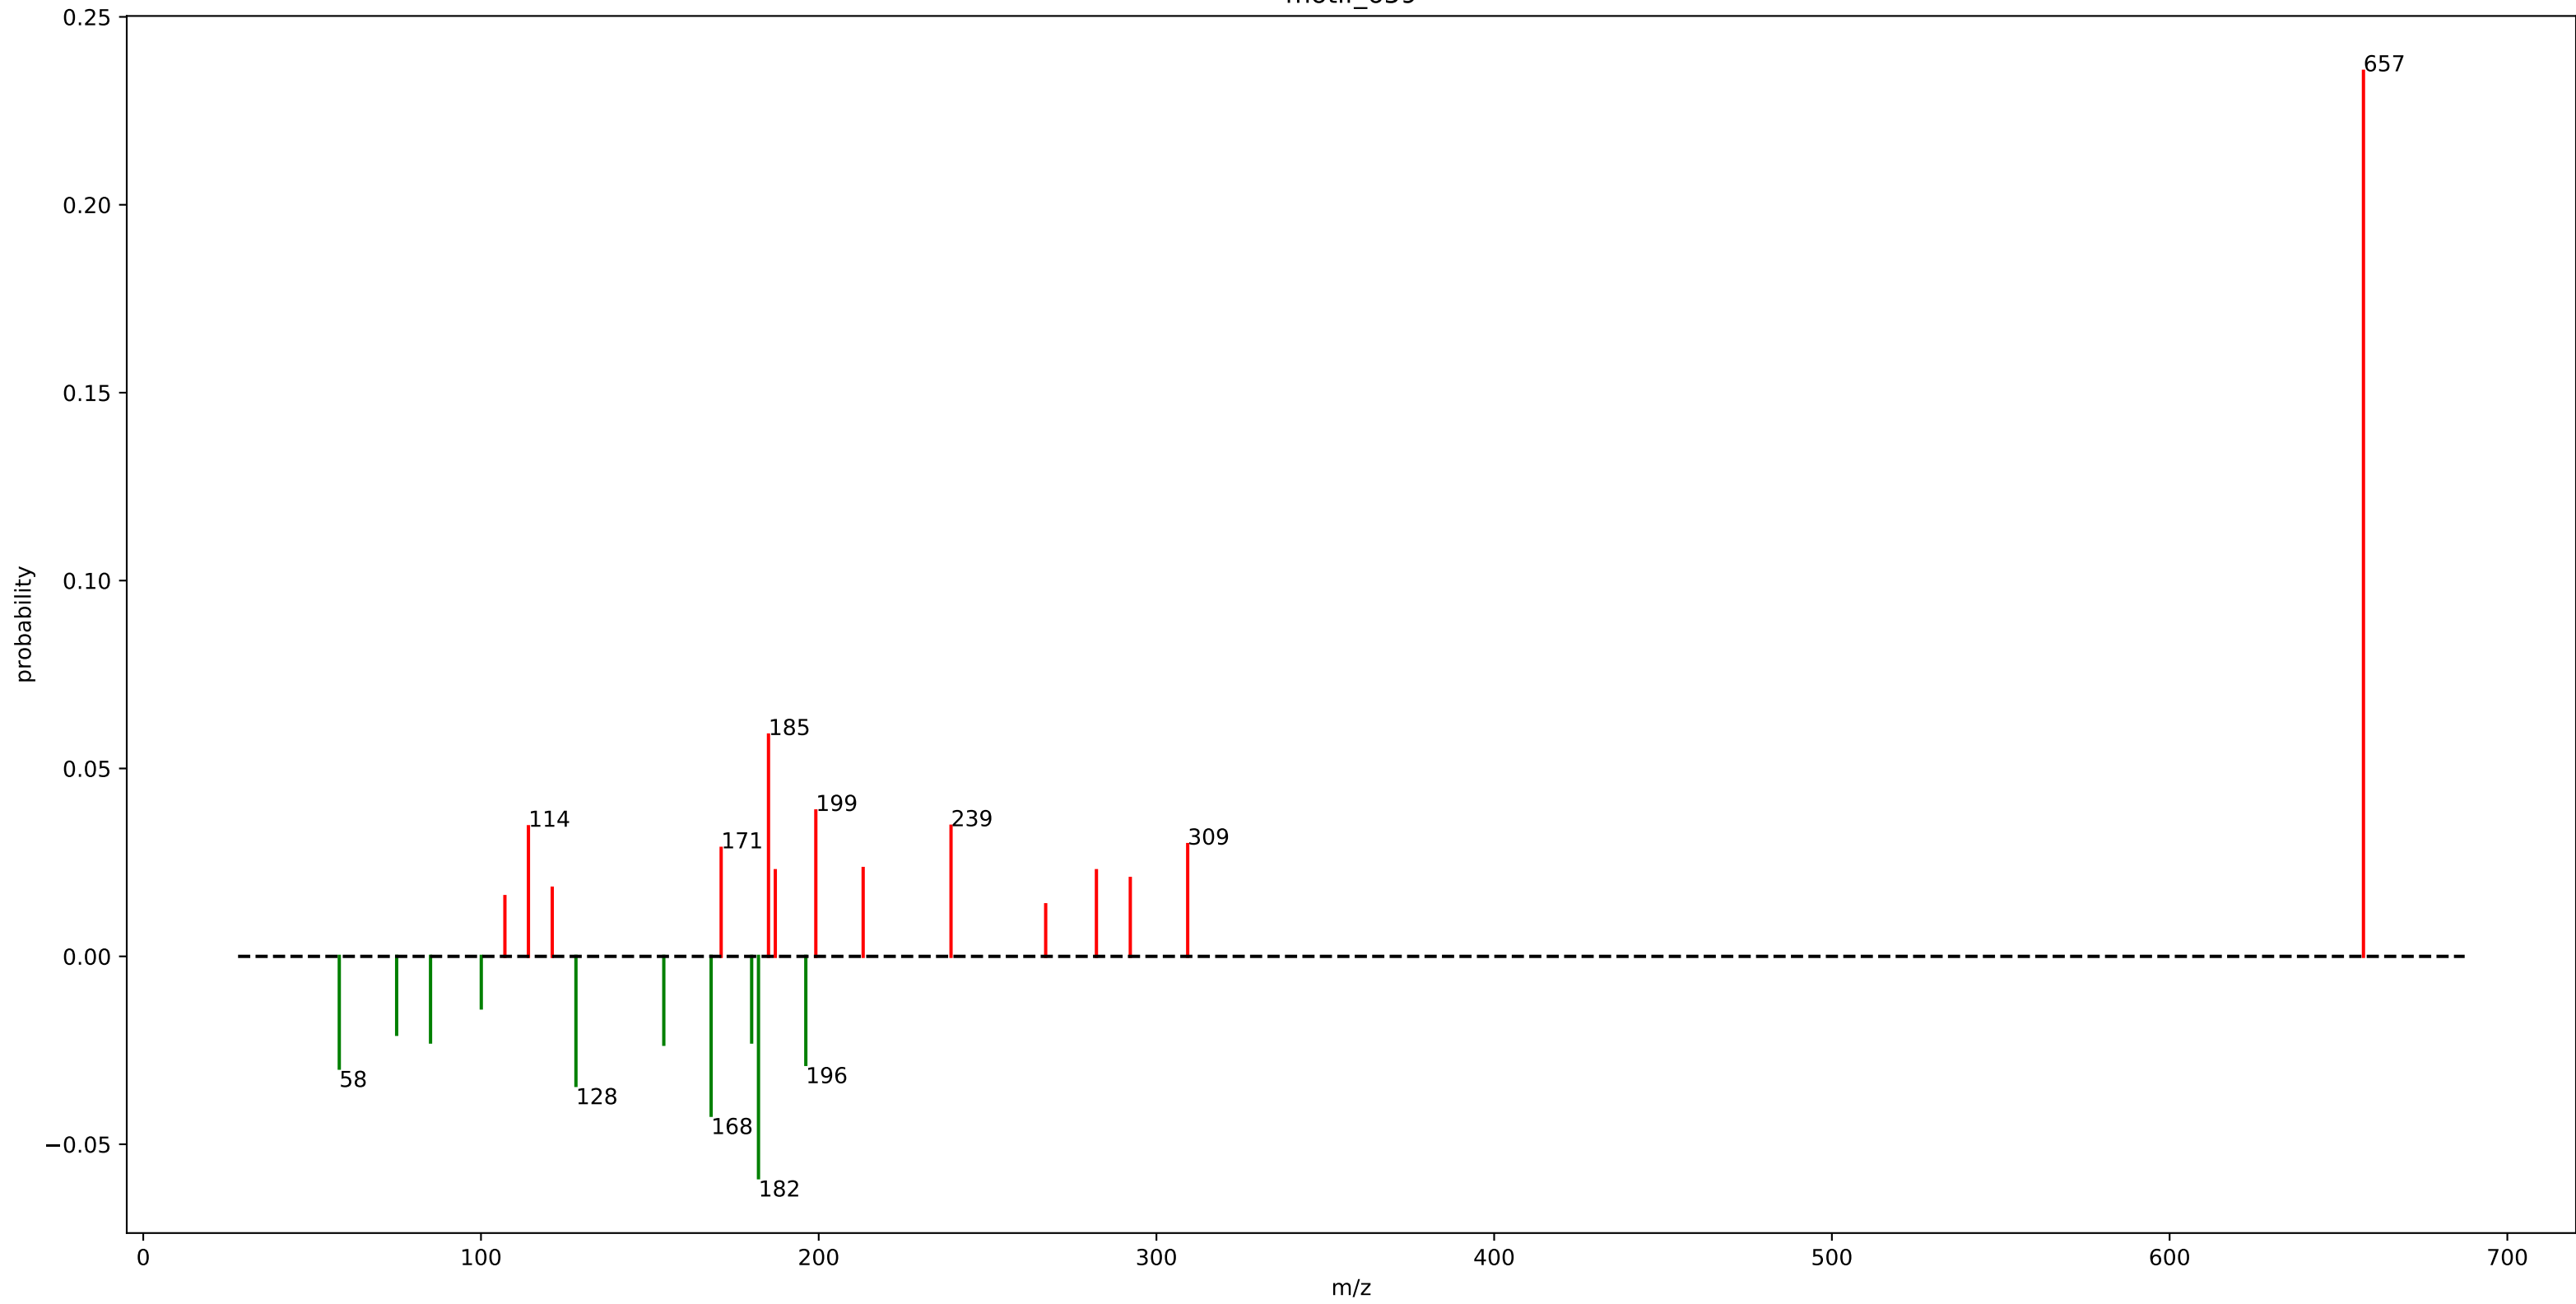

## motif\_659

|                   |        |                   |        |
|-------------------|--------|-------------------|--------|
| fragment_657.3975 | : 0.24 | fragment_121.0975 | : 0.02 |
| fragment_185.1325 | : 0.06 | fragment_107.0825 | : 0.02 |
| loss_182.1675     | : 0.06 | loss_100.0875     | : 0.01 |
| loss_168.1475     | : 0.04 | fragment_267.2075 | : 0.01 |
| fragment_199.1475 | : 0.04 |                   |        |
| fragment_239.1775 | : 0.03 |                   |        |
| fragment_114.0525 | : 0.03 |                   |        |
| loss_128.1175     | : 0.03 |                   |        |
| loss_58.0425      | : 0.03 |                   |        |
| fragment_309.2575 | : 0.03 |                   |        |
| fragment_171.1175 | : 0.03 |                   |        |
| loss_196.1825     | : 0.03 |                   |        |
| loss_154.1325     | : 0.02 |                   |        |
| fragment_213.1625 | : 0.02 |                   |        |
| loss_180.1475     | : 0.02 |                   |        |
| fragment_282.2325 | : 0.02 |                   |        |
| loss_85.0625      | : 0.02 |                   |        |
| fragment_187.1475 | : 0.02 |                   |        |
| loss_75.0325      | : 0.02 |                   |        |
| fragment_292.2625 | : 0.02 |                   |        |

urine\_mass2motif\_106.m2m

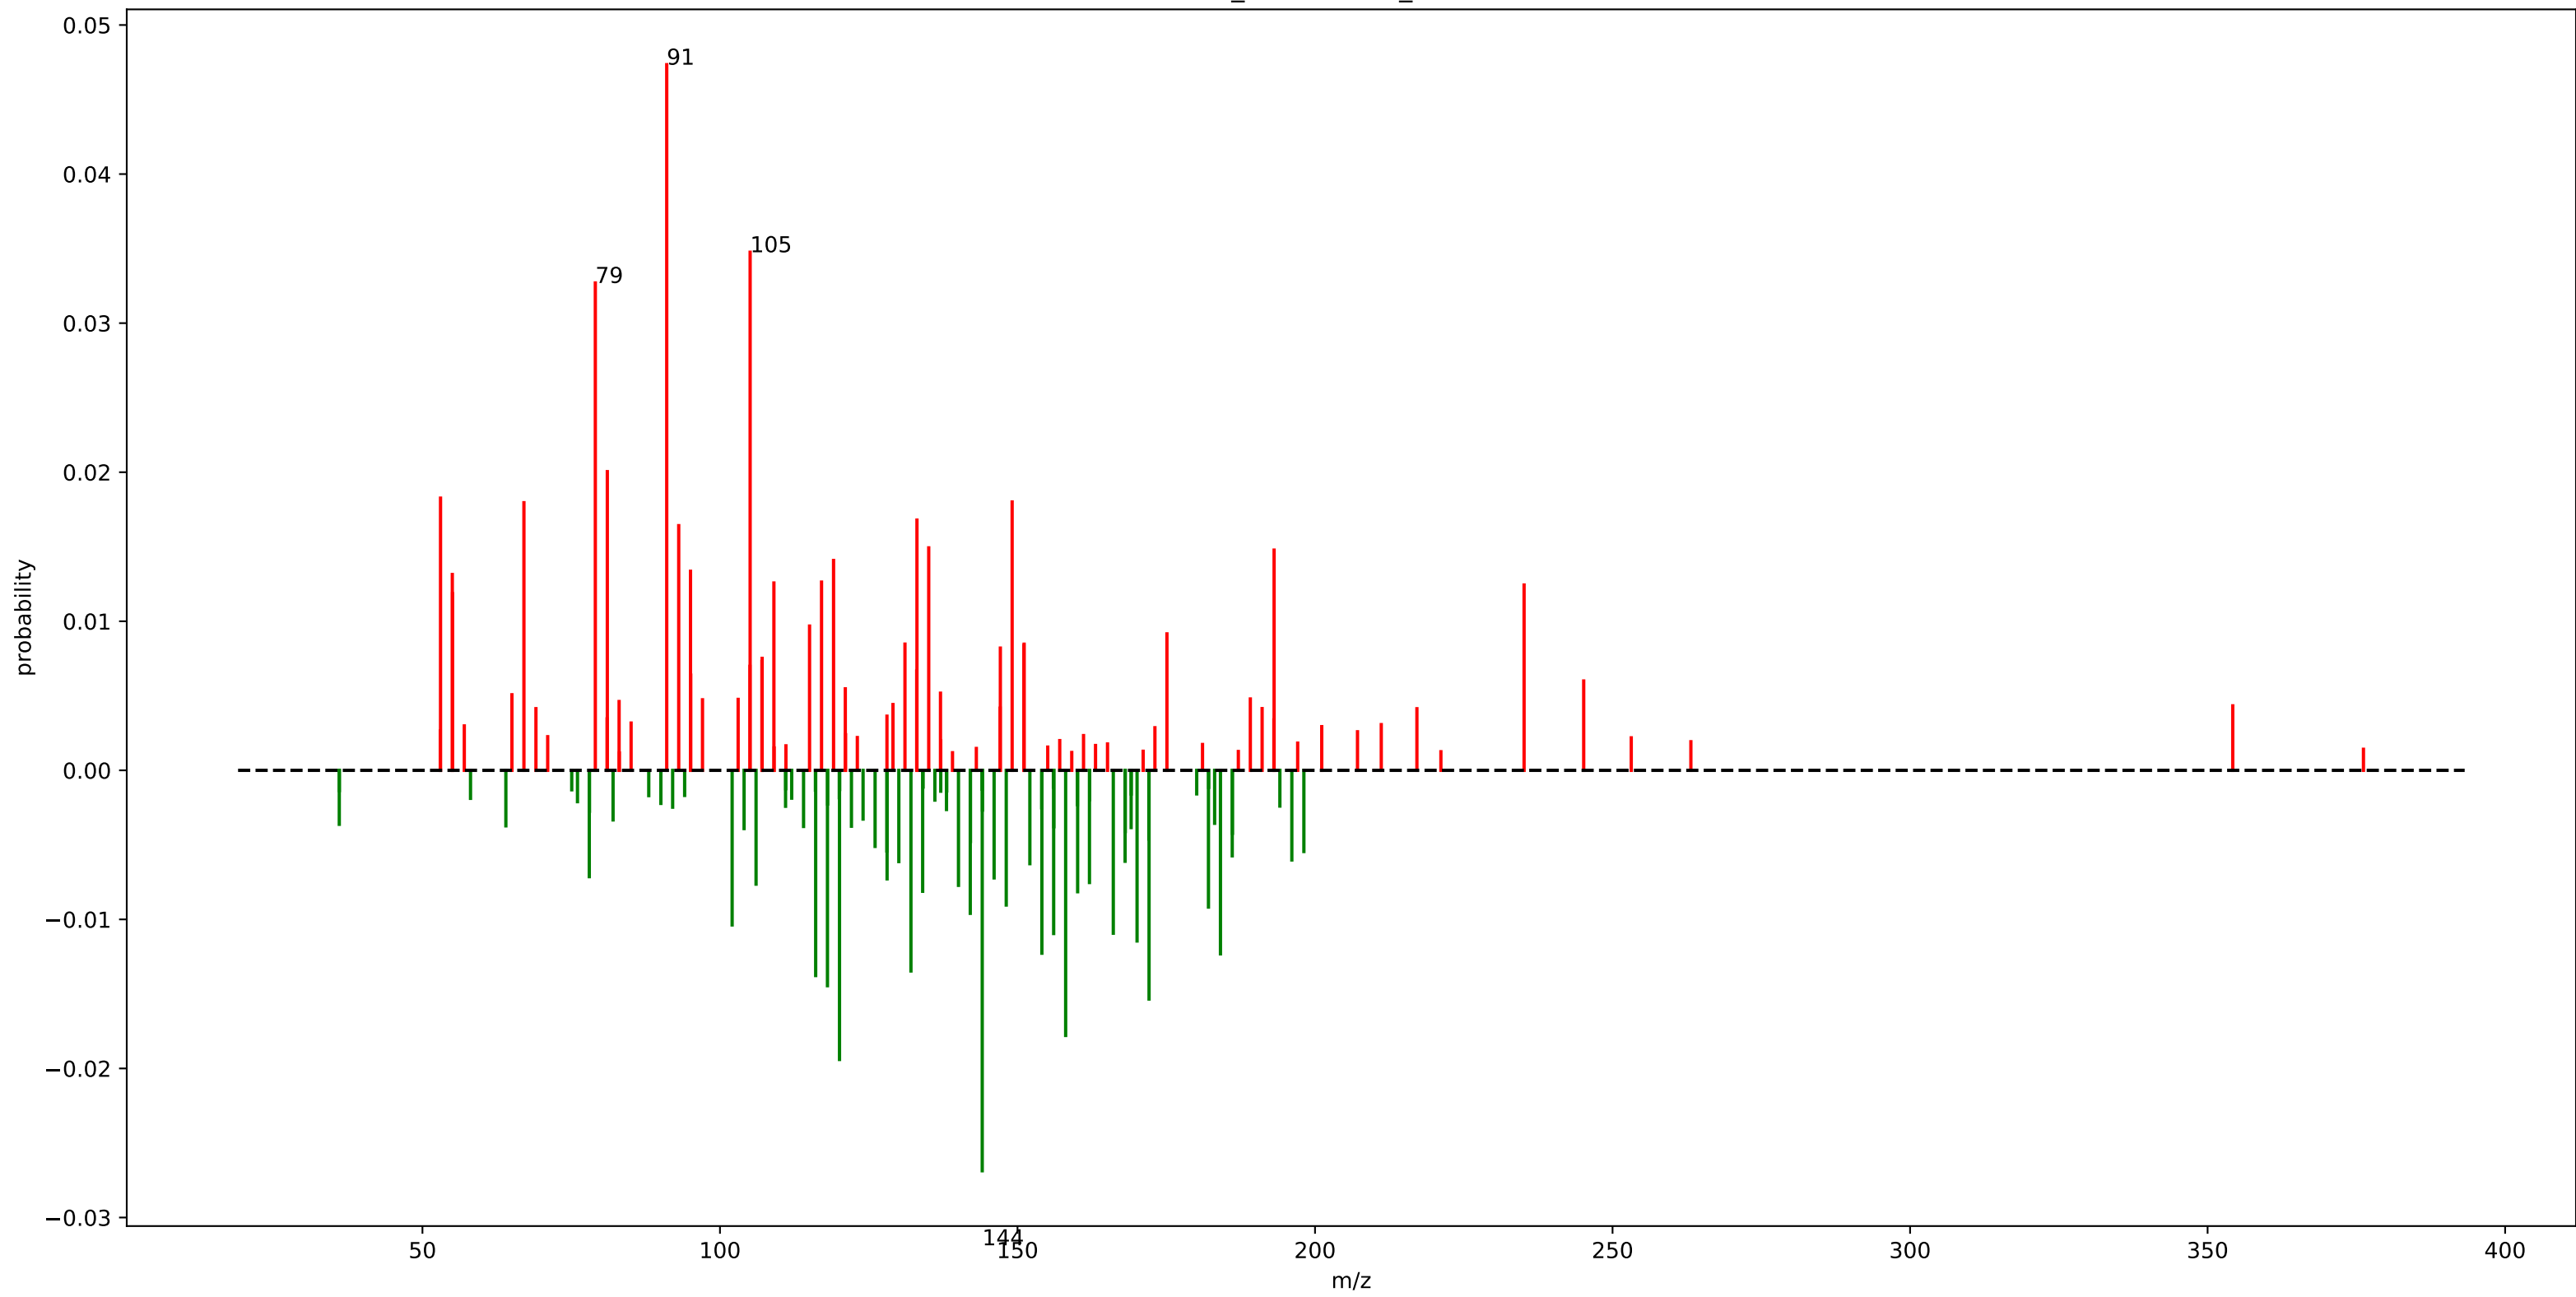

# urine\_mass2motif\_106.m2m

|                   |        |                   |        |                   |        |                   |        |
|-------------------|--------|-------------------|--------|-------------------|--------|-------------------|--------|
| fragment_91.0525  | : 0.05 | fragment_55.0175  | : 0.01 | loss_160.1075     | : 0.01 | loss_198.1275     | : 0.01 |
| fragment_105.0675 | : 0.03 | fragment_117.0675 | : 0.01 | loss_134.0625     | : 0.01 | loss_128.0475     | : 0.01 |
| fragment_79.0525  | : 0.03 | fragment_109.0625 | : 0.01 | loss_140.0825     | : 0.01 | fragment_137.0575 | : 0.01 |
| loss_144.0725     | : 0.03 | fragment_235.1325 | : 0.01 | loss_106.0625     | : 0.01 | loss_126.0675     | : 0.01 |
| fragment_81.0675  | : 0.02 | loss_184.1075     | : 0.01 | loss_162.0925     | : 0.01 | fragment_65.0375  | : 0.01 |
| loss_120.0875     | : 0.02 | loss_154.0975     | : 0.01 | fragment_107.0875 | : 0.01 |                   |        |
| fragment_53.0375  | : 0.02 | fragment_55.0525  | : 0.01 | fragment_107.0475 | : 0.01 |                   |        |
| fragment_149.0975 | : 0.02 | loss_170.0925     | : 0.01 | loss_128.0825     | : 0.01 |                   |        |
| fragment_67.0525  | : 0.02 | loss_156.0775     | : 0.01 | loss_146.0675     | : 0.01 |                   |        |
| loss_158.0925     | : 0.02 | loss_166.0975     | : 0.01 | loss_78.0375      | : 0.01 |                   |        |
| fragment_133.1025 | : 0.02 | loss_102.0425     | : 0.01 | fragment_105.0325 | : 0.01 |                   |        |
| fragment_93.0675  | : 0.02 | fragment_115.0525 | : 0.01 | fragment_133.0625 | : 0.01 |                   |        |
| loss_172.1075     | : 0.02 | loss_142.0625     | : 0.01 | fragment_95.0875  | : 0.01 |                   |        |
| fragment_135.0825 | : 0.01 | loss_182.0925     | : 0.01 | loss_152.0775     | : 0.01 |                   |        |
| fragment_193.1225 | : 0.01 | fragment_175.1125 | : 0.01 | loss_130.0575     | : 0.01 |                   |        |
| loss_118.0625     | : 0.01 | loss_148.1075     | : 0.01 | loss_168.0825     | : 0.01 |                   |        |
| fragment_119.0875 | : 0.01 | fragment_131.0875 | : 0.01 | loss_196.1025     | : 0.01 |                   |        |
| loss_116.0825     | : 0.01 | fragment_151.1125 | : 0.01 | fragment_245.1525 | : 0.01 |                   |        |
| loss_132.0925     | : 0.01 | fragment_151.0775 | : 0.01 | loss_186.0875     | : 0.01 |                   |        |
| fragment_95.0475  | : 0.01 | fragment_147.1175 | : 0.01 | fragment_121.0625 | : 0.01 |                   |        |

urine\_mass2motif\_245.m2m

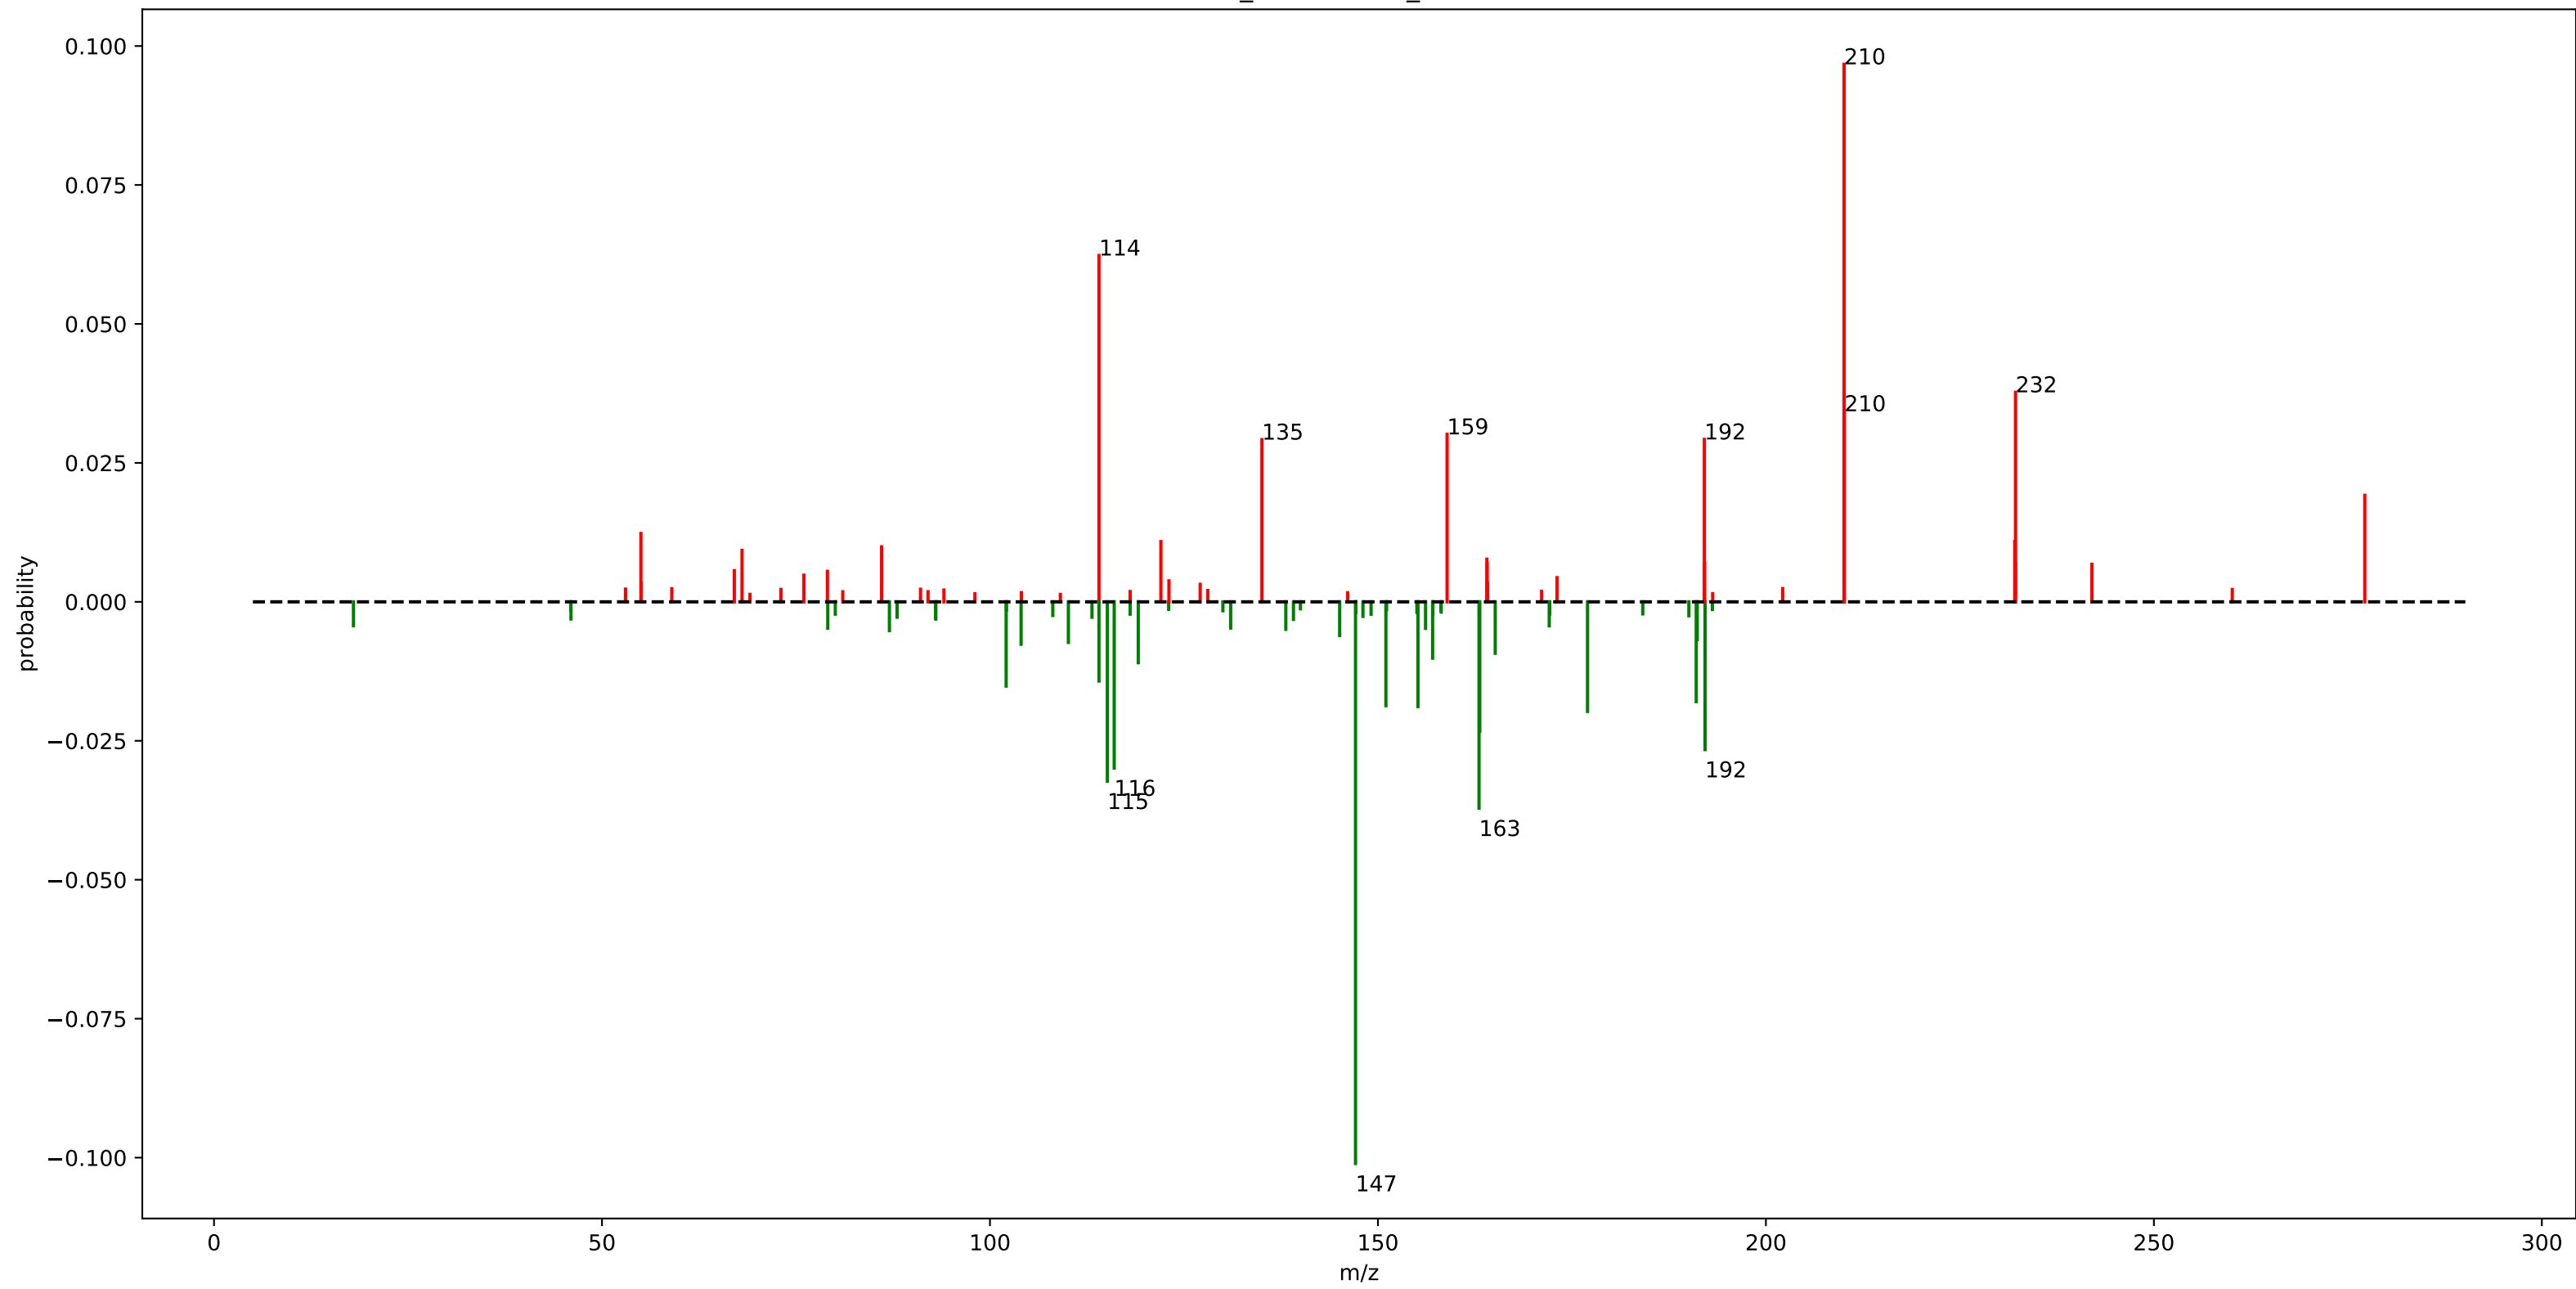

# urine\_mass2motif\_245.m2m

|                   |        |                   |        |
|-------------------|--------|-------------------|--------|
| loss_147.1125     | : 0.10 | fragment_55.0175  | : 0.01 |
| fragment_210.0775 | : 0.10 | loss_119.1125     | : 0.01 |
| fragment_114.0525 | : 0.06 | fragment_232.0725 | : 0.01 |
| fragment_232.1725 | : 0.04 | fragment_122.0275 | : 0.01 |
| loss_163.0275     | : 0.04 | loss_157.0475     | : 0.01 |
| fragment_210.1125 | : 0.03 | fragment_86.0325  | : 0.01 |
| loss_115.1275     | : 0.03 | loss_165.1175     | : 0.01 |
| fragment_158.9125 | : 0.03 | fragment_68.0475  | : 0.01 |
| loss_116.0125     | : 0.03 | fragment_164.0375 | : 0.01 |
| fragment_192.0675 | : 0.03 | loss_104.0125     | : 0.01 |
| fragment_135.0475 | : 0.03 | loss_110.1075     | : 0.01 |
| loss_192.1575     | : 0.03 | fragment_192.1025 | : 0.01 |
| loss_163.1225     | : 0.02 | fragment_164.0725 | : 0.01 |
| loss_177.0125     | : 0.02 | fragment_232.1525 | : 0.01 |
| fragment_277.1825 | : 0.02 | loss_191.1525     | : 0.01 |
| loss_155.1575     | : 0.02 | fragment_242.0125 | : 0.01 |
| loss_151.0275     | : 0.02 | loss_145.0675     | : 0.01 |
| loss_191.0225     | : 0.02 | fragment_67.0525  | : 0.01 |
| loss_102.0875     | : 0.02 | fragment_79.0525  | : 0.01 |
| loss_114.0475     | : 0.01 | loss_87.0425      | : 0.01 |

motif\_638

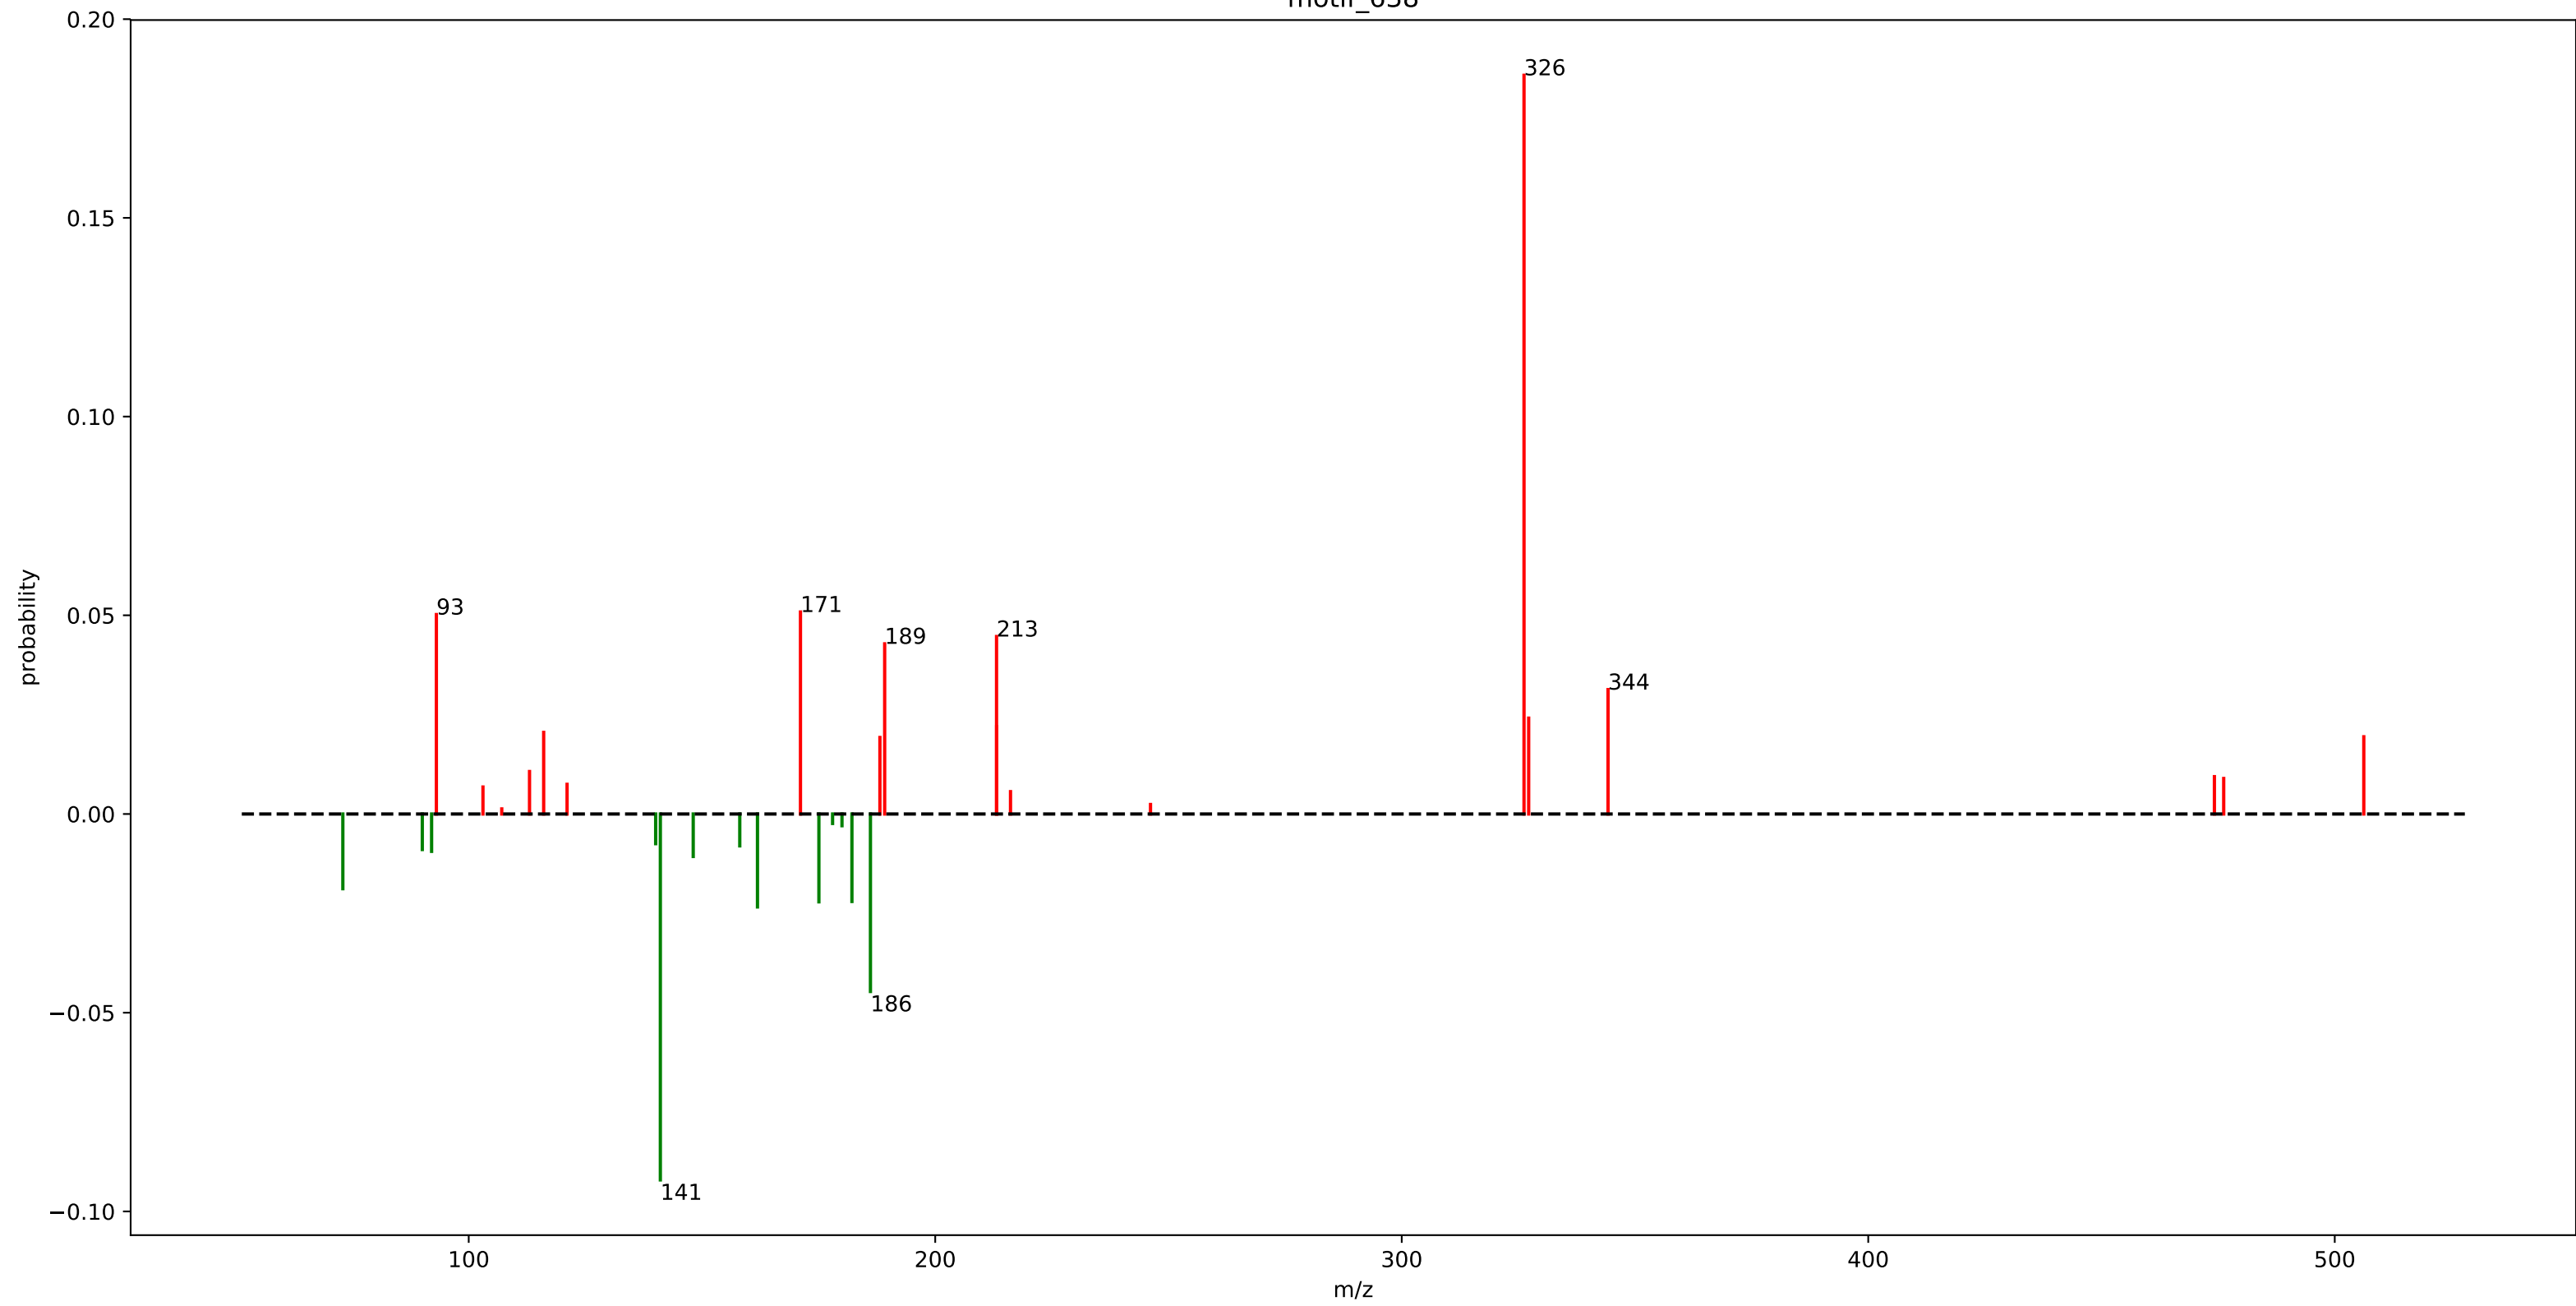

## motif\_638

|                   |        |                   |        |
|-------------------|--------|-------------------|--------|
| fragment_326.2125 | : 0.19 | loss_92.0425      | : 0.01 |
| loss_141.0775     | : 0.09 | loss_90.0475      | : 0.01 |
| fragment_171.1125 | : 0.05 | fragment_476.1975 | : 0.01 |
| fragment_93.0675  | : 0.05 | loss_158.1025     | : 0.01 |
| fragment_213.1425 | : 0.04 | loss_140.0725     | : 0.01 |
| loss_186.1125     | : 0.04 | fragment_121.0825 | : 0.01 |
| fragment_189.1625 | : 0.04 | fragment_103.0525 | : 0.01 |
| fragment_344.2225 | : 0.03 | fragment_216.1375 | : 0.01 |
| fragment_327.2125 | : 0.02 |                   |        |
| loss_161.8975     | : 0.02 |                   |        |
| loss_175.0625     | : 0.02 |                   |        |
| loss_182.1425     | : 0.02 |                   |        |
| fragment_213.1625 | : 0.02 |                   |        |
| fragment_116.0675 | : 0.02 |                   |        |
| fragment_506.2275 | : 0.02 |                   |        |
| fragment_188.1425 | : 0.02 |                   |        |
| loss_73.0175      | : 0.02 |                   |        |
| loss_148.1225     | : 0.01 |                   |        |
| fragment_113.0325 | : 0.01 |                   |        |
| fragment_474.2025 | : 0.01 |                   |        |



motif\_600

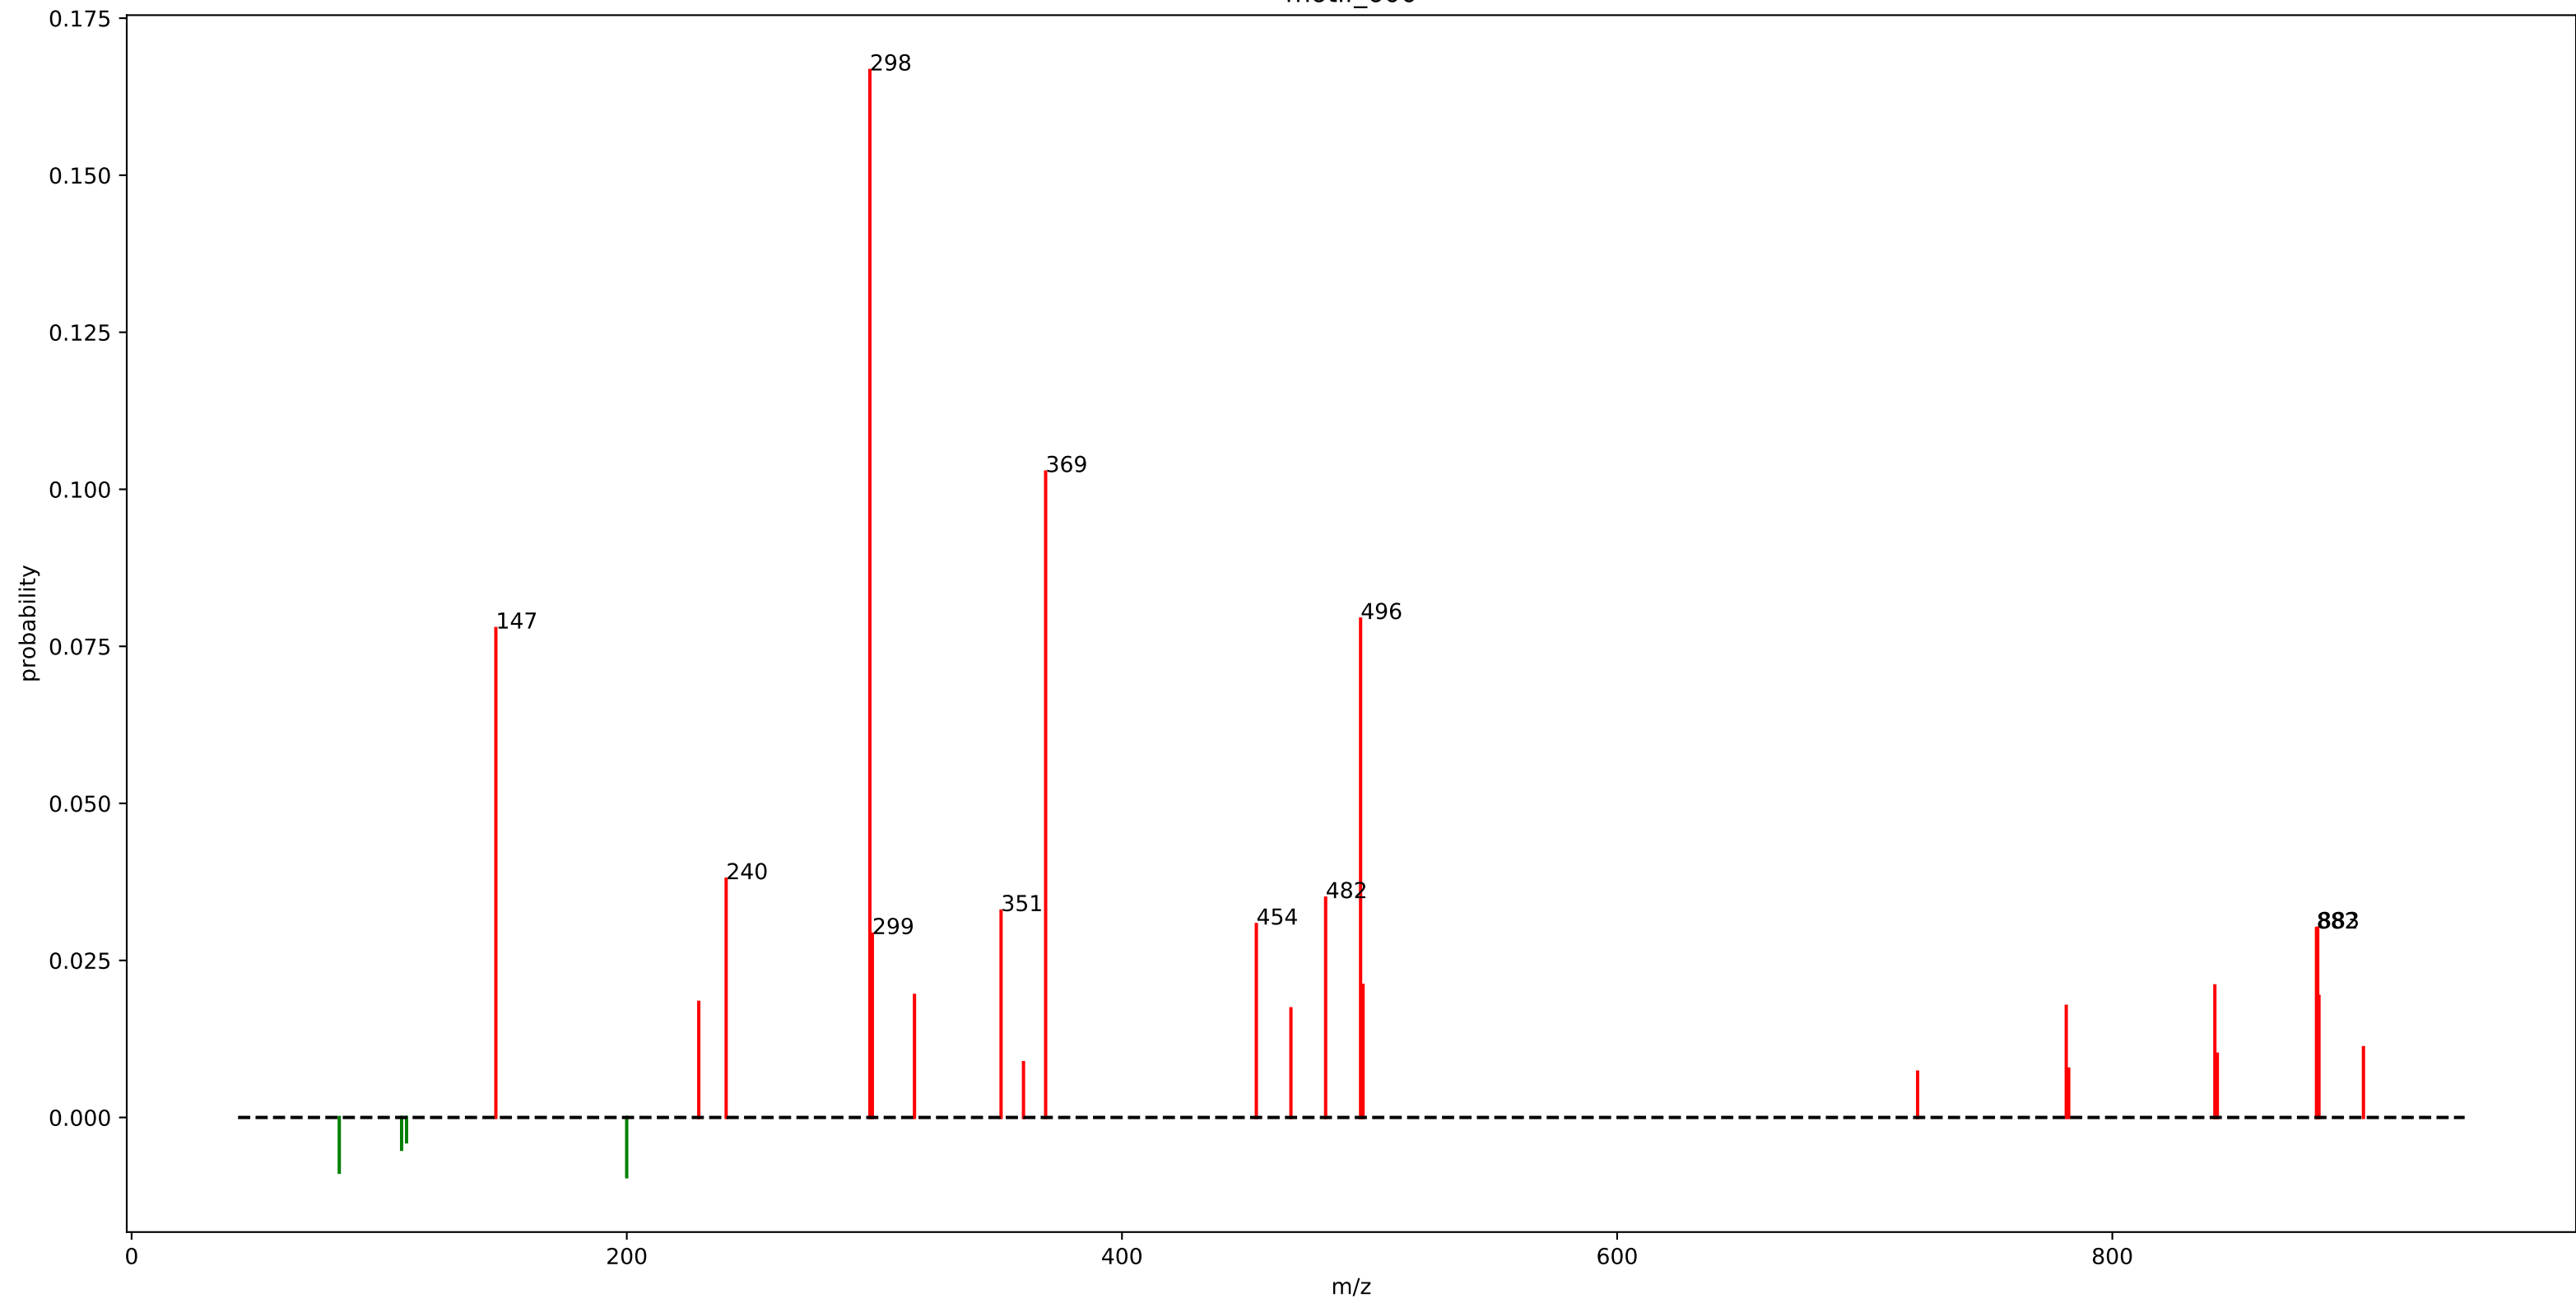

## motif\_600

|                   |        |                   |        |
|-------------------|--------|-------------------|--------|
| fragment_298.1775 | : 0.17 | loss_199.9675     | : 0.01 |
| fragment_369.1775 | : 0.10 | fragment_360.2225 | : 0.01 |
| fragment_496.3775 | : 0.08 | loss_83.8775      | : 0.01 |
| fragment_147.1175 | : 0.08 | fragment_782.3875 | : 0.01 |
| fragment_240.1325 | : 0.04 | fragment_721.3625 | : 0.01 |
| fragment_482.2625 | : 0.03 | loss_109.0525     | : 0.01 |
| fragment_351.1675 | : 0.03 |                   |        |
| fragment_454.2675 | : 0.03 |                   |        |
| fragment_882.9575 | : 0.03 |                   |        |
| fragment_882.4575 | : 0.03 |                   |        |
| fragment_299.1825 | : 0.03 |                   |        |
| fragment_497.3775 | : 0.02 |                   |        |
| fragment_841.4075 | : 0.02 |                   |        |
| fragment_316.1925 | : 0.02 |                   |        |
| fragment_883.4575 | : 0.02 |                   |        |
| fragment_229.0775 | : 0.02 |                   |        |
| fragment_781.3875 | : 0.02 |                   |        |
| fragment_468.2425 | : 0.02 |                   |        |
| fragment_901.4275 | : 0.01 |                   |        |
| fragment_842.4075 | : 0.01 |                   |        |

mb\_motif\_11.m2m

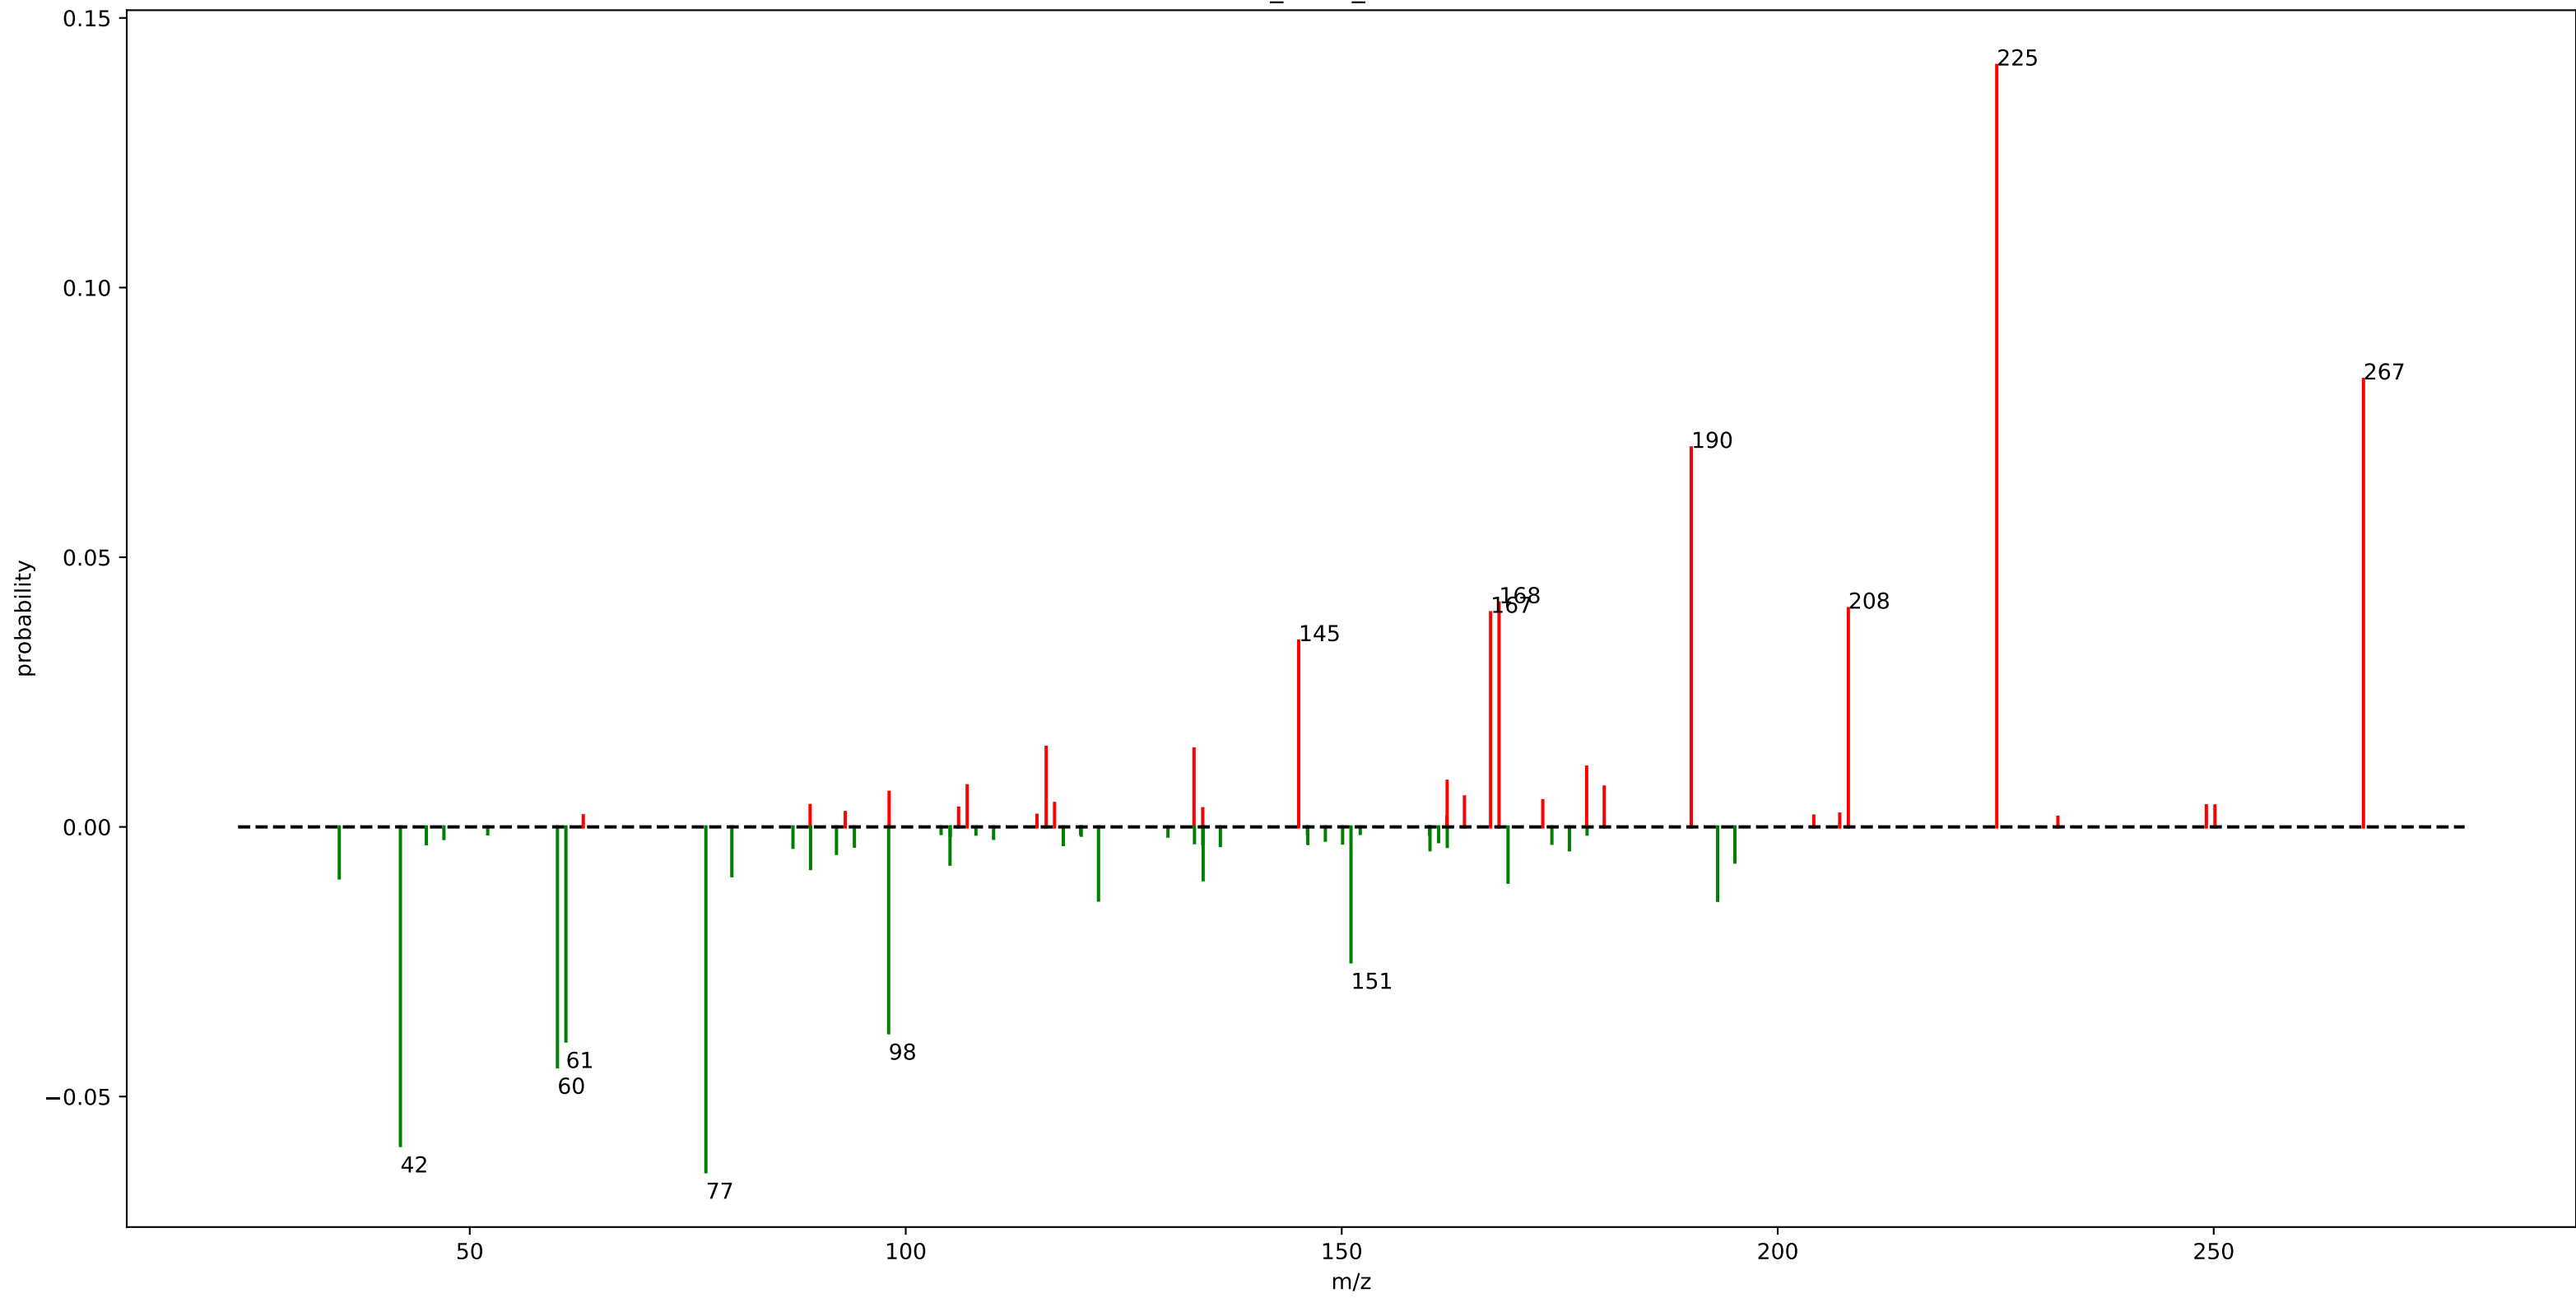

## mb\_motif\_11.m2m

|                   |        |                   |        |
|-------------------|--------|-------------------|--------|
| fragment_225.1225 | : 0.14 | loss_35.0375      | : 0.01 |
| fragment_267.1725 | : 0.08 | loss_80.0575      | : 0.01 |
| fragment_190.0875 | : 0.07 | fragment_162.0925 | : 0.01 |
| loss_77.0825      | : 0.06 | loss_89.0825      | : 0.01 |
| loss_42.0475      | : 0.06 | fragment_107.0475 | : 0.01 |
| loss_60.0575      | : 0.04 | fragment_180.1025 | : 0.01 |
| fragment_168.0425 | : 0.04 | loss_105.0775     | : 0.01 |
| fragment_208.0975 | : 0.04 | loss_195.0875     | : 0.01 |
| loss_61.0275      | : 0.04 | fragment_98.0975  | : 0.01 |
| fragment_167.0725 | : 0.04 | fragment_164.0725 | : 0.01 |
| loss_98.0375      | : 0.04 |                   |        |
| fragment_145.0625 | : 0.03 |                   |        |
| loss_151.0625     | : 0.03 |                   |        |
| fragment_116.1075 | : 0.01 |                   |        |
| fragment_133.0625 | : 0.01 |                   |        |
| loss_193.1125     | : 0.01 |                   |        |
| loss_122.1075     | : 0.01 |                   |        |
| fragment_178.0875 | : 0.01 |                   |        |
| loss_169.0725     | : 0.01 |                   |        |
| loss_134.1075     | : 0.01 |                   |        |

urine\_mass2motif\_262.m2m

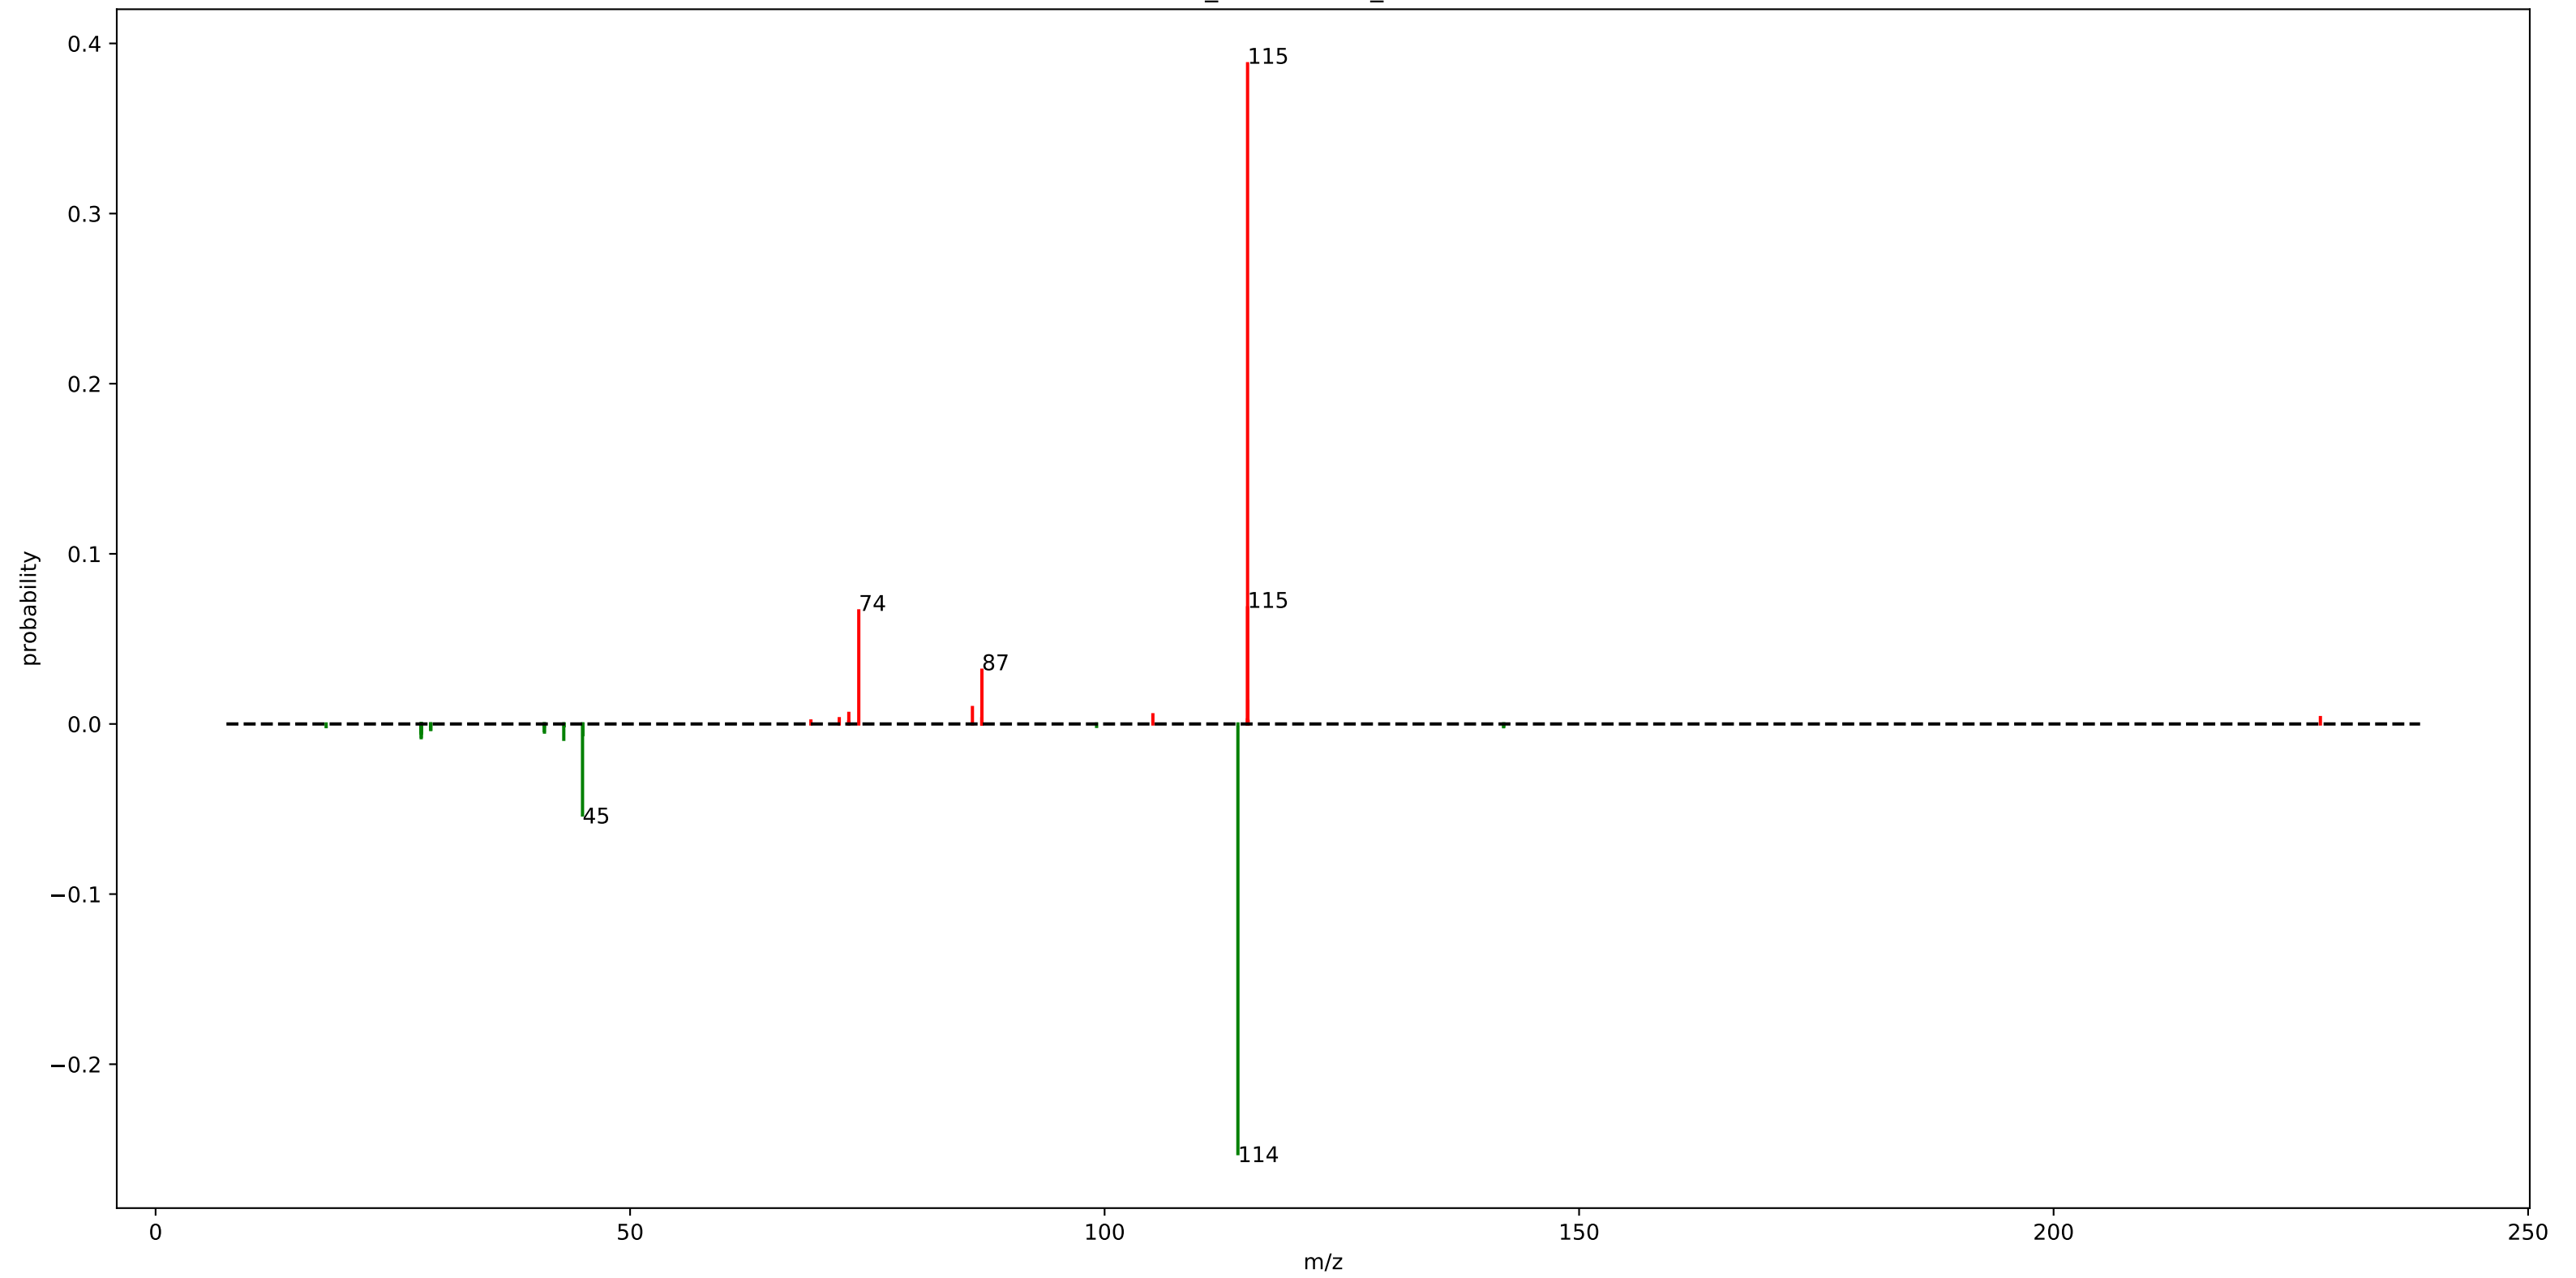

# urine\_mass2motif\_262.m2m

|                   |        |
|-------------------|--------|
| fragment_115.0675 | : 0.39 |
| loss_114.0475     | : 0.25 |
| fragment_115.0625 | : 0.07 |
| fragment_74.0975  | : 0.07 |
| loss_44.9875      | : 0.05 |
| fragment_87.0725  | : 0.03 |
| fragment_115.0925 | : 0.01 |
| fragment_86.0725  | : 0.01 |
| fragment_87.0675  | : 0.01 |
| loss_43.0125      | : 0.01 |
| loss_27.9875      | : 0.01 |
| loss_27.9925      | : 0.01 |
| loss_45.0325      | : 0.01 |
| fragment_73.0475  | : 0.01 |
| fragment_105.0875 | : 0.01 |
| loss_28.0025      | : 0.01 |
| loss_27.9775      | : 0.01 |

gnps\_motif\_40.m2m

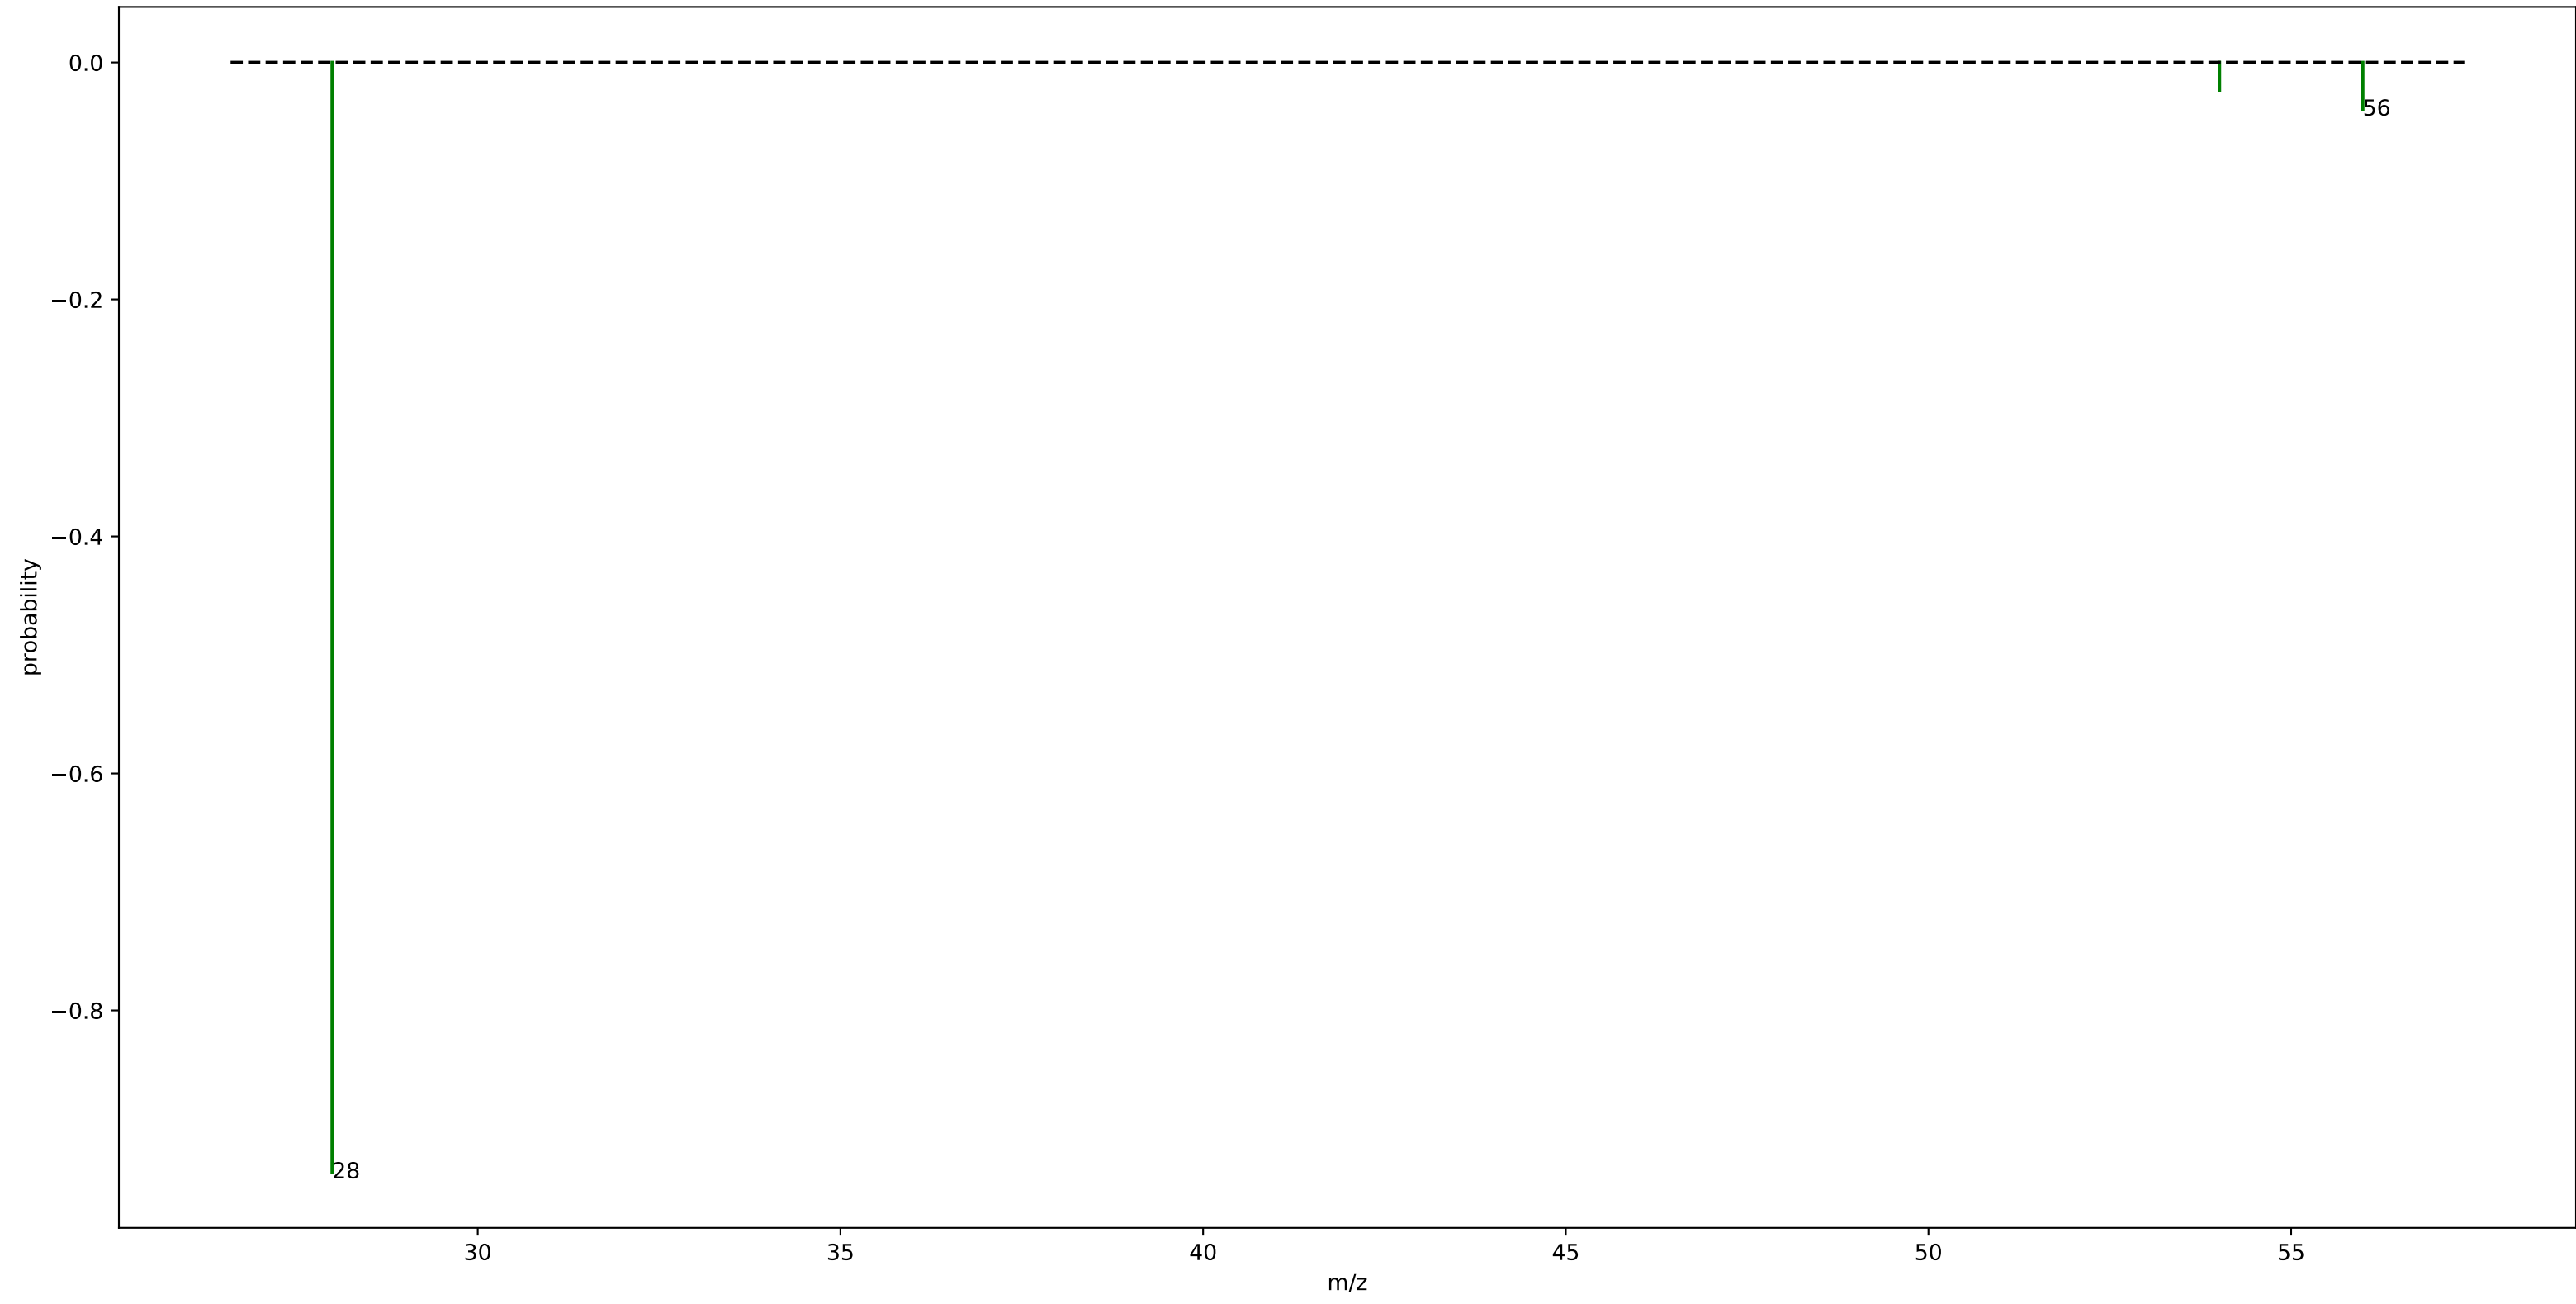

## gnps\_motif\_40.m2m

|              |        |
|--------------|--------|
| loss_27.9925 | : 0.94 |
| loss_55.9875 | : 0.04 |
| loss_54.0125 | : 0.02 |



euphorbia\_motif\_296.m2m

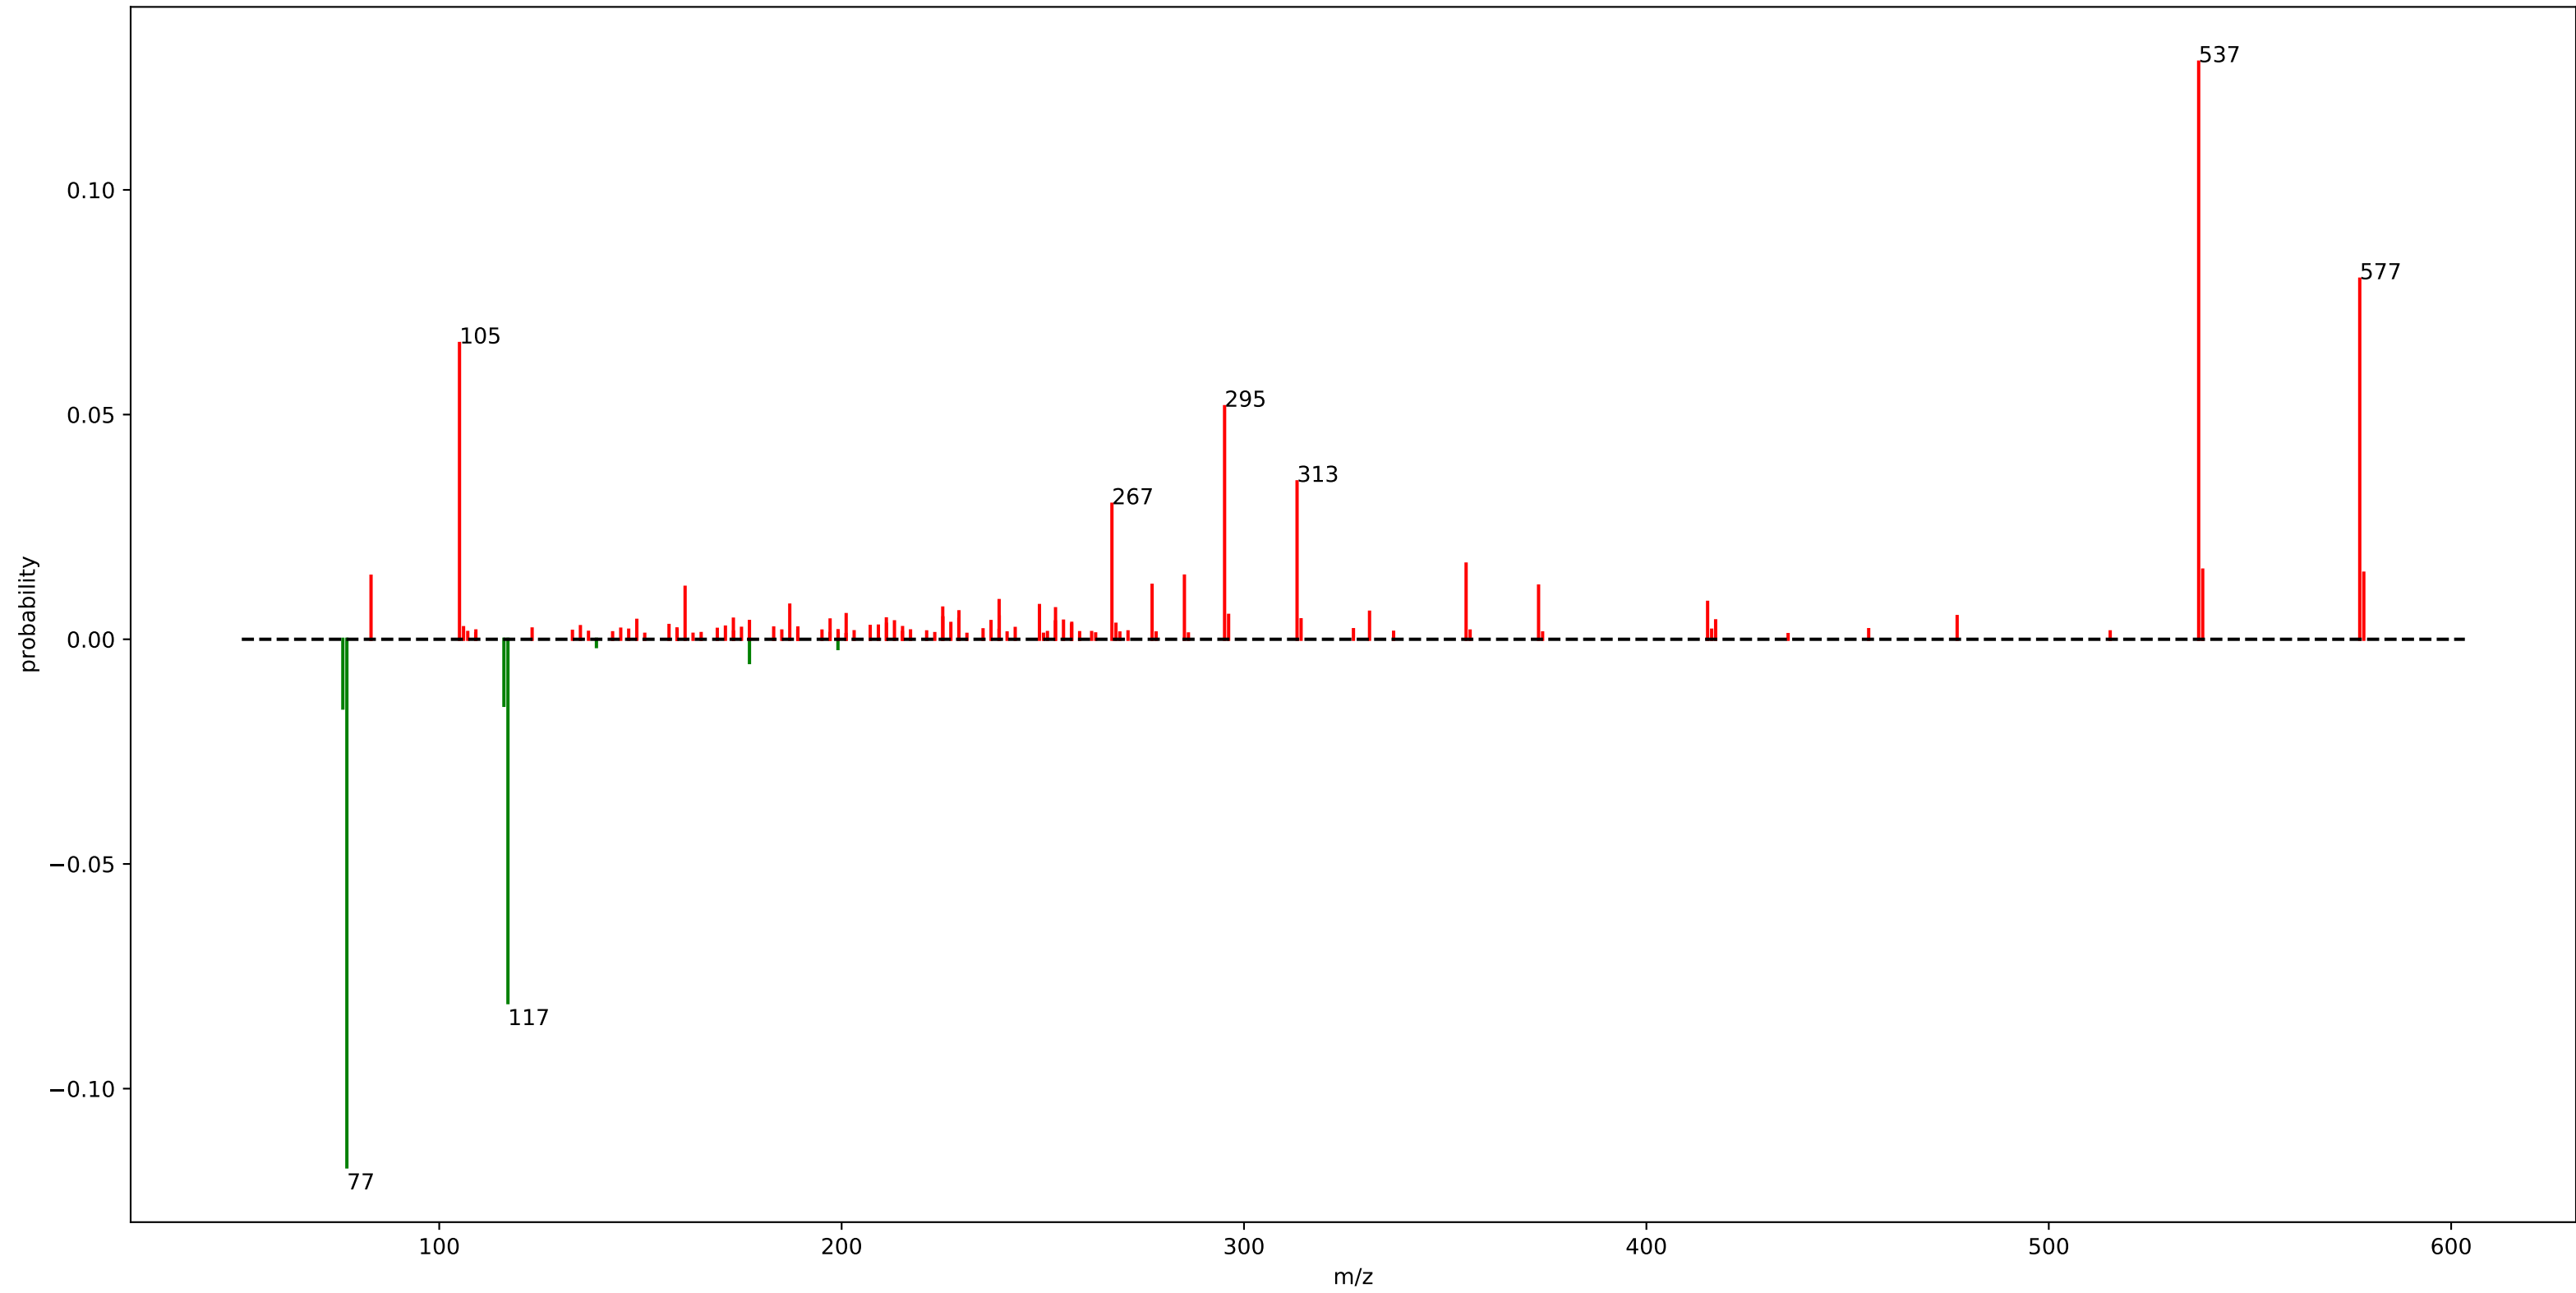

# euphorbia\_motif\_296.m2m

|                   |        |                   |        |
|-------------------|--------|-------------------|--------|
| fragment_537.2525 | : 0.13 | fragment_187.1125 | : 0.01 |
| loss_77.0425      | : 0.12 | fragment_249.1625 | : 0.01 |
| loss_117.0725     | : 0.08 | fragment_225.1275 | : 0.01 |
| fragment_577.2825 | : 0.08 | fragment_253.1575 | : 0.01 |
| fragment_105.0325 | : 0.07 | fragment_229.1575 | : 0.01 |
| fragment_295.1725 | : 0.05 | fragment_331.1925 | : 0.01 |
| fragment_313.1825 | : 0.04 | fragment_201.1275 | : 0.01 |
| fragment_267.1725 | : 0.03 | fragment_296.1725 | : 0.01 |
| fragment_355.1925 | : 0.02 | loss_177.0975     | : 0.01 |
| fragment_538.2525 | : 0.02 | fragment_477.2275 | : 0.01 |
| loss_76.0425      | : 0.02 |                   |        |
| fragment_578.2875 | : 0.01 |                   |        |
| loss_116.0725     | : 0.01 |                   |        |
| fragment_285.1875 | : 0.01 |                   |        |
| fragment_83.0475  | : 0.01 |                   |        |
| fragment_277.1575 | : 0.01 |                   |        |
| fragment_373.2025 | : 0.01 |                   |        |
| fragment_161.0975 | : 0.01 |                   |        |
| fragment_239.1425 | : 0.01 |                   |        |
| fragment_415.2125 | : 0.01 |                   |        |

motif\_606

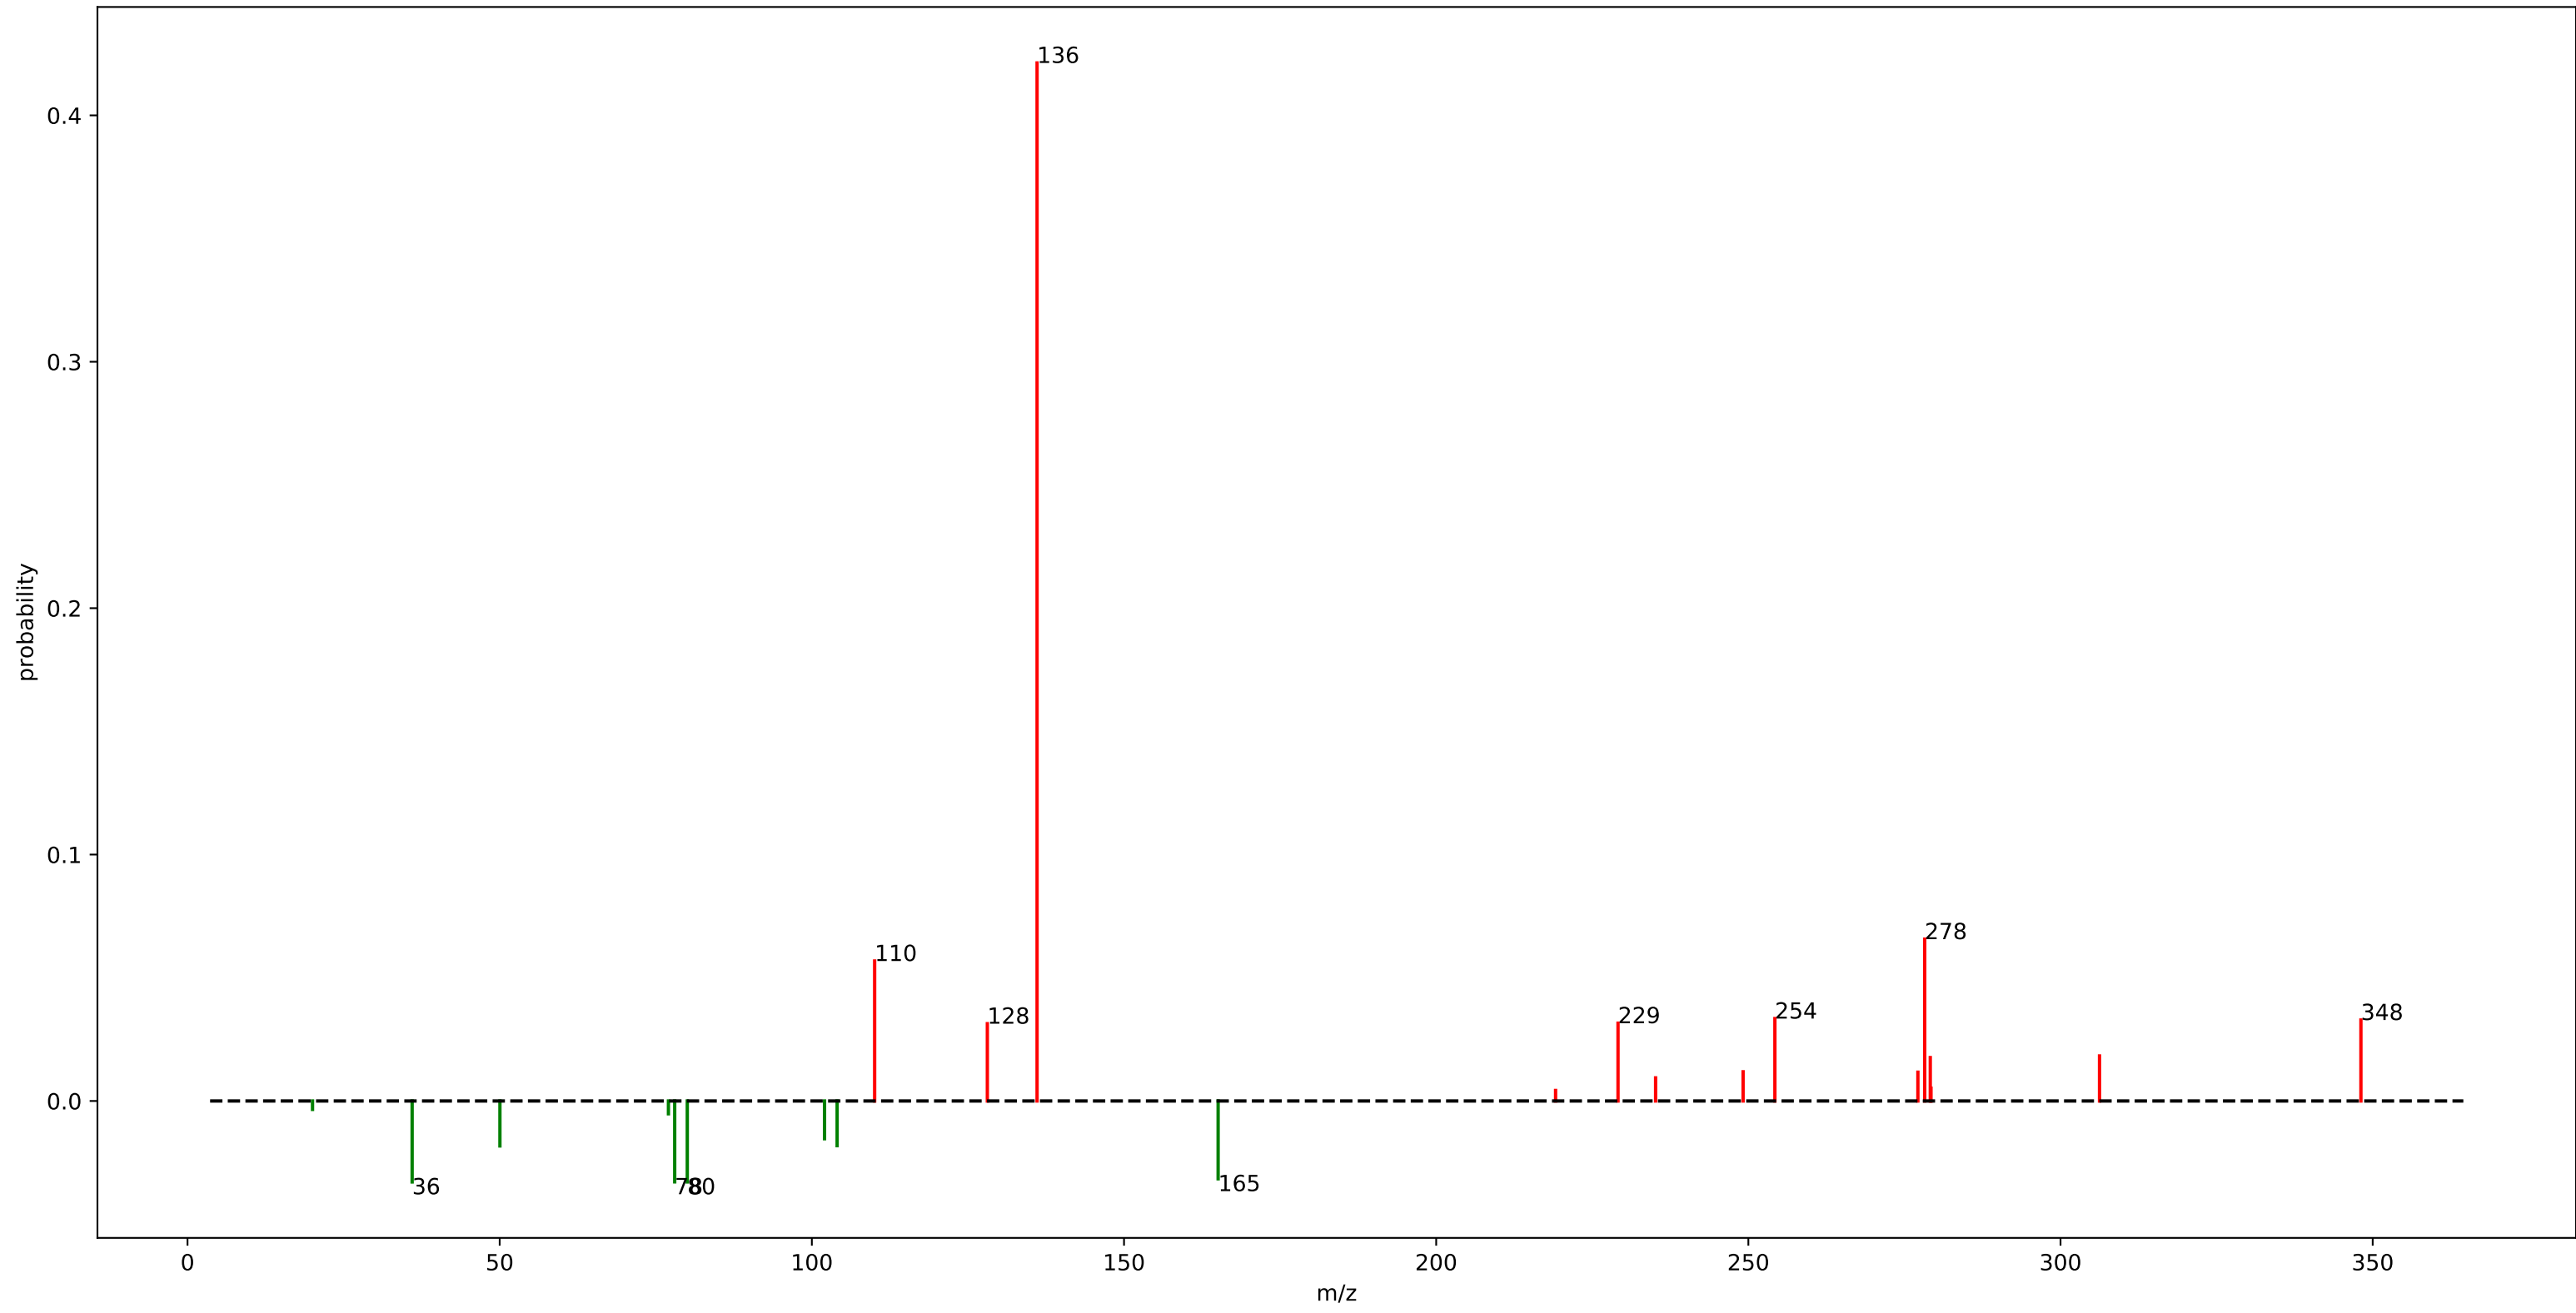

## motif\_606

|                   |        |              |        |
|-------------------|--------|--------------|--------|
| fragment_136.0725 | : 0.42 | loss_77.0275 | : 0.01 |
| fragment_278.2475 | : 0.07 |              |        |
| fragment_110.0575 | : 0.06 |              |        |
| fragment_254.2475 | : 0.03 |              |        |
| loss_80.0475      | : 0.03 |              |        |
| loss_35.9775      | : 0.03 |              |        |
| fragment_348.1125 | : 0.03 |              |        |
| loss_78.0325      | : 0.03 |              |        |
| fragment_229.1225 | : 0.03 |              |        |
| loss_165.0725     | : 0.03 |              |        |
| fragment_128.1075 | : 0.03 |              |        |
| fragment_306.2425 | : 0.02 |              |        |
| loss_50.0375      | : 0.02 |              |        |
| loss_104.0475     | : 0.02 |              |        |
| fragment_279.1375 | : 0.02 |              |        |
| loss_102.0325     | : 0.02 |              |        |
| fragment_249.1575 | : 0.01 |              |        |
| fragment_277.1525 | : 0.01 |              |        |
| fragment_235.1425 | : 0.01 |              |        |
| fragment_279.2525 | : 0.01 |              |        |

urine\_mass2motif\_282.m2m

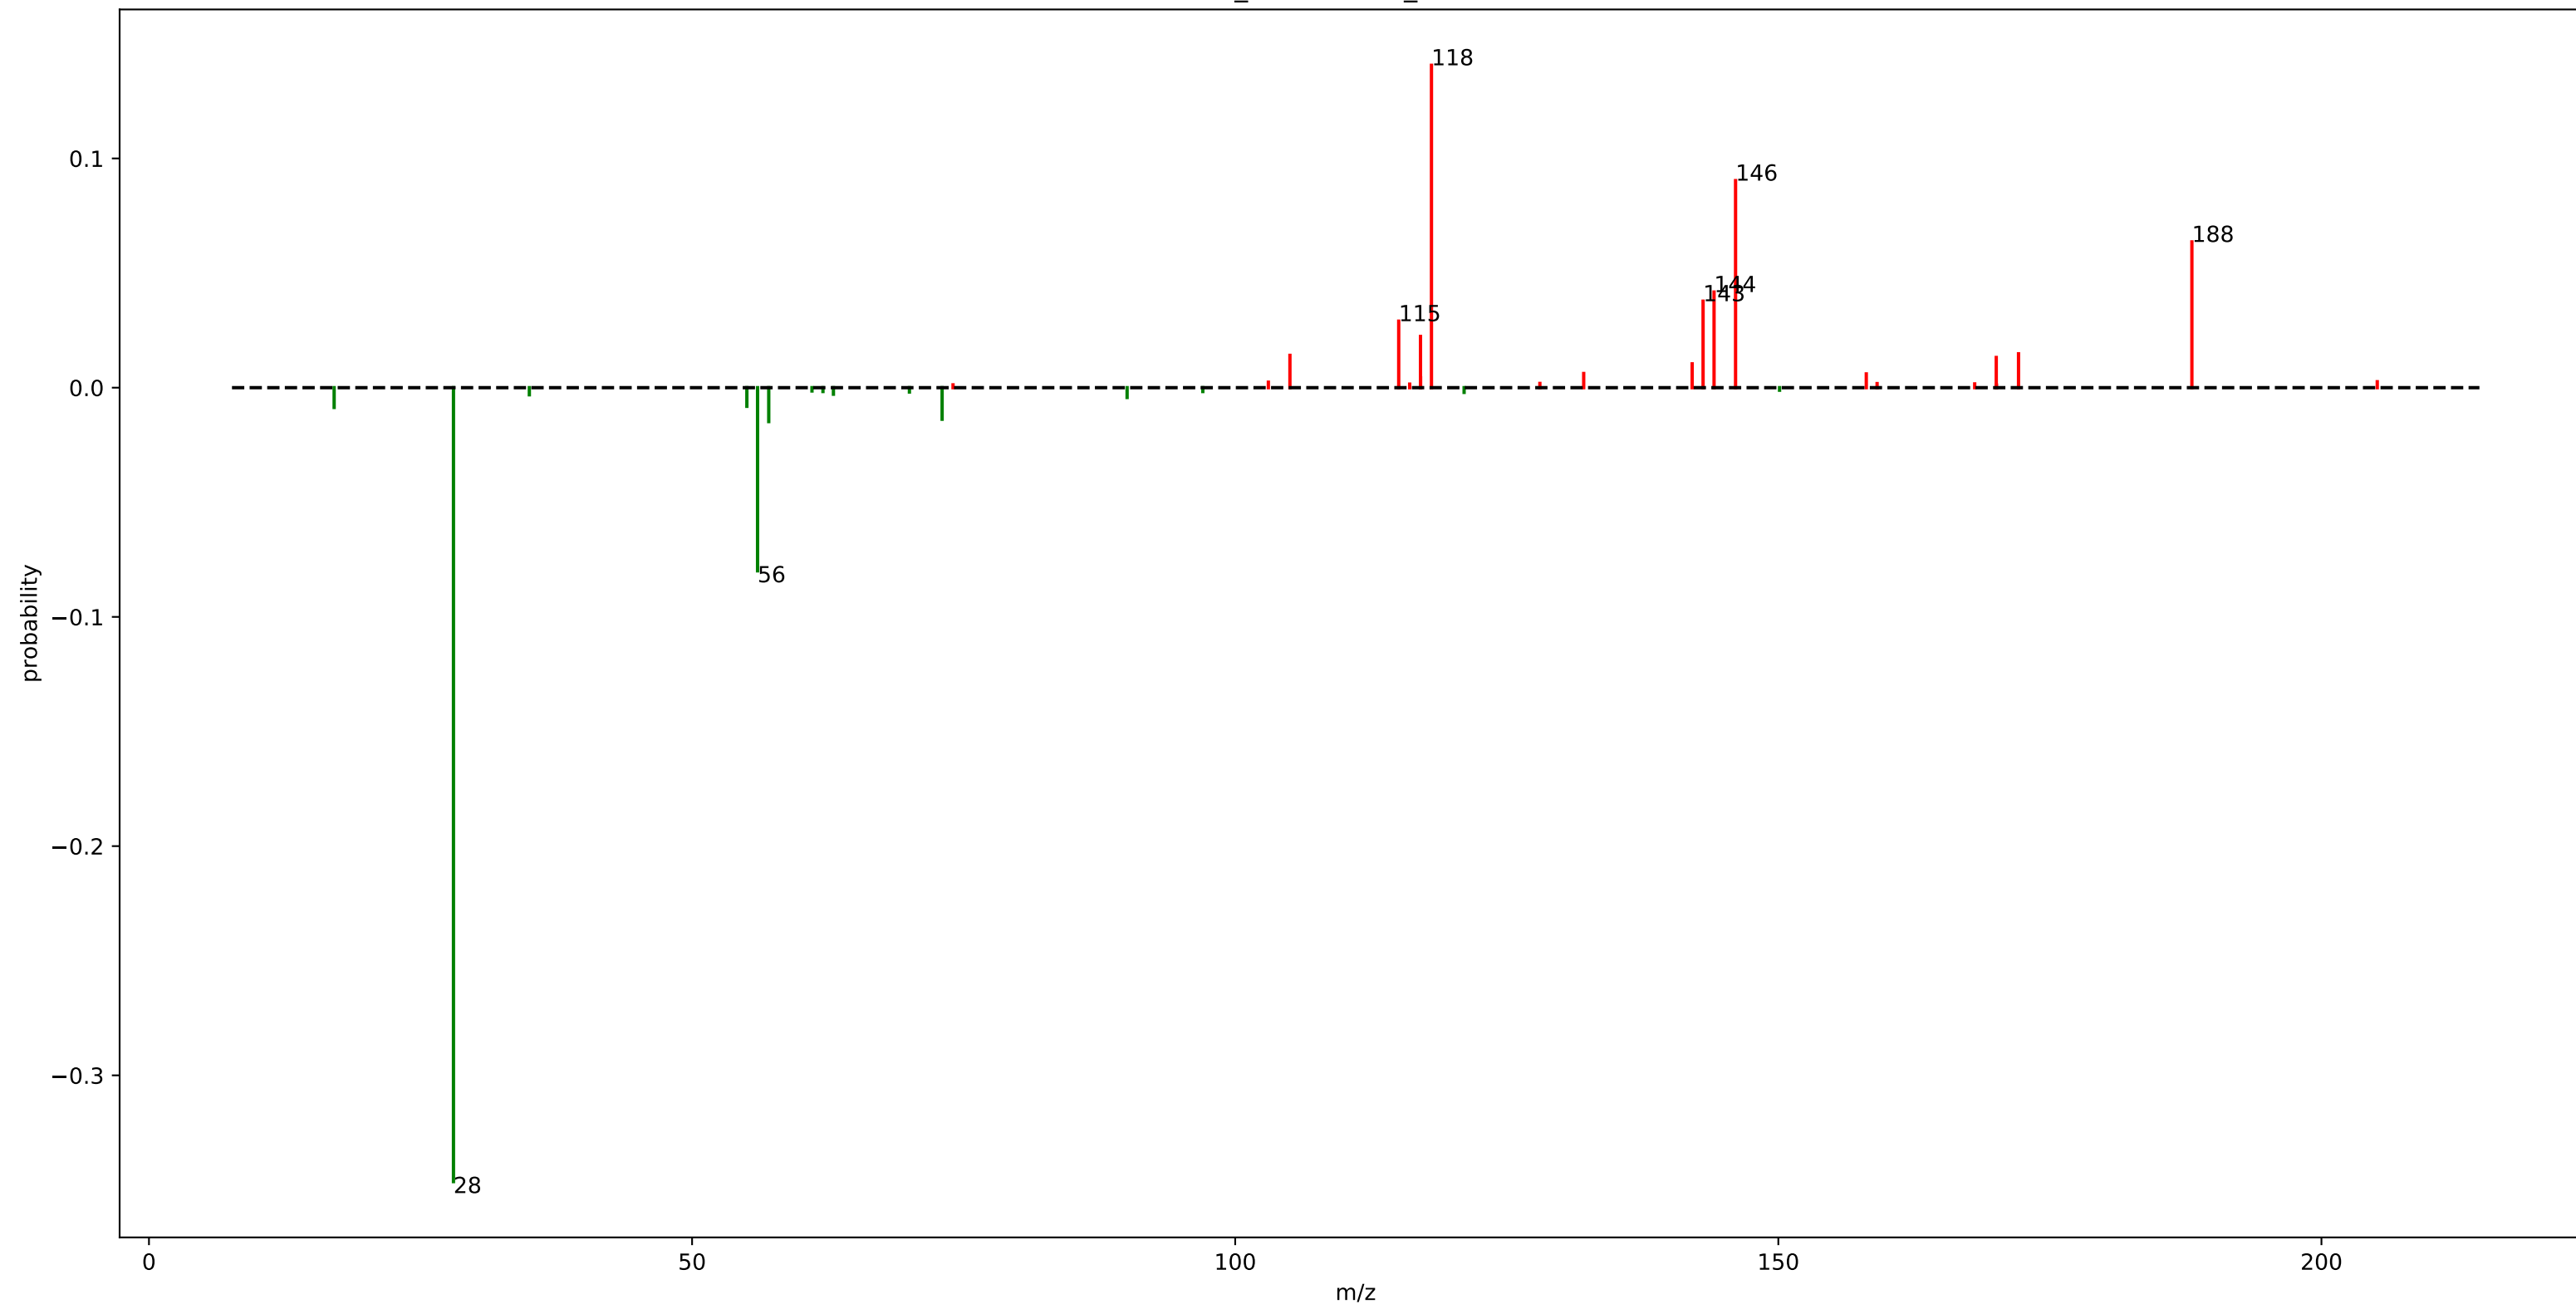

# urine\_mass2motif\_282.m2m

|                   |        |
|-------------------|--------|
| loss_28.0325      | : 0.35 |
| fragment_118.0675 | : 0.14 |
| fragment_146.0625 | : 0.09 |
| loss_56.0275      | : 0.08 |
| fragment_188.0725 | : 0.06 |
| fragment_144.0825 | : 0.04 |
| fragment_143.0725 | : 0.04 |
| fragment_115.0525 | : 0.03 |
| fragment_117.0575 | : 0.02 |
| loss_57.0575      | : 0.01 |
| fragment_172.1125 | : 0.01 |
| fragment_105.0375 | : 0.01 |
| loss_73.0175      | : 0.01 |
| fragment_170.0625 | : 0.01 |
| fragment_142.0675 | : 0.01 |
| loss_17.0475      | : 0.01 |
| loss_55.0425      | : 0.01 |
| fragment_132.0825 | : 0.01 |
| fragment_158.0975 | : 0.01 |

motif\_605

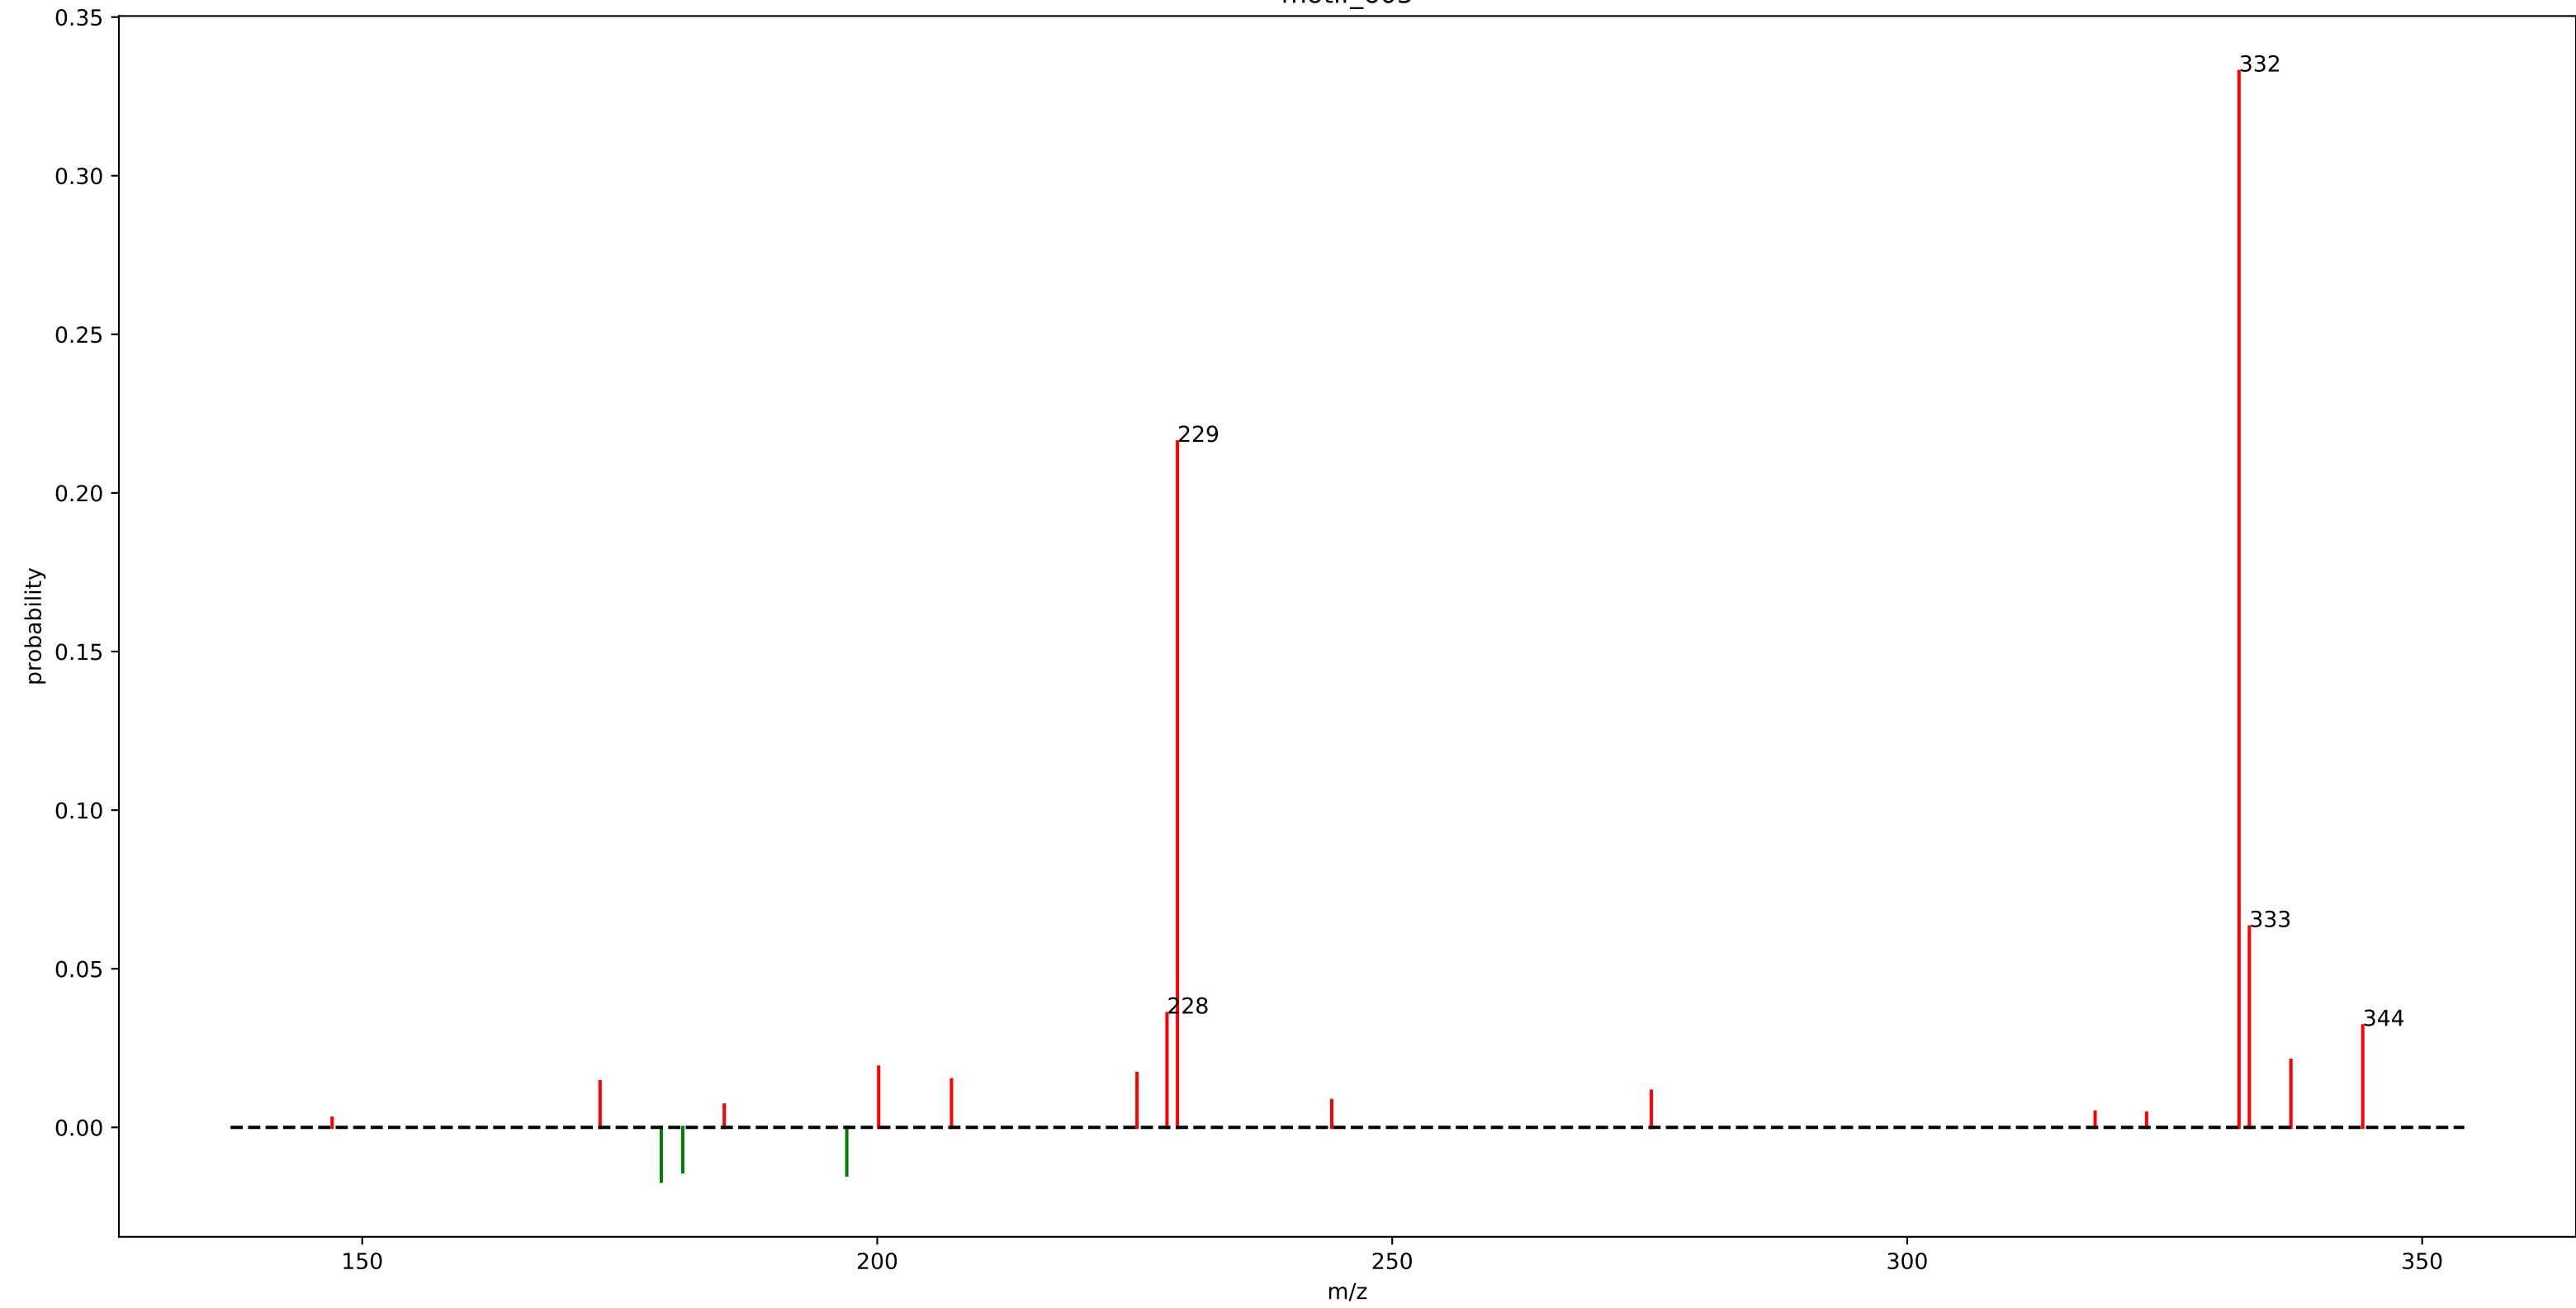

## motif\_605

|                   |        |
|-------------------|--------|
| fragment_332.2175 | : 0.33 |
| fragment_229.1475 | : 0.22 |
| fragment_333.2225 | : 0.06 |
| fragment_228.1325 | : 0.04 |
| fragment_344.2325 | : 0.03 |
| fragment_337.2575 | : 0.02 |
| fragment_200.1375 | : 0.02 |
| fragment_225.2225 | : 0.02 |
| loss_179.0325     | : 0.02 |
| loss_197.0425     | : 0.02 |
| fragment_207.2125 | : 0.02 |
| fragment_173.0925 | : 0.01 |
| loss_181.1175     | : 0.01 |
| fragment_275.1625 | : 0.01 |
| fragment_244.1275 | : 0.01 |
| fragment_185.1475 | : 0.01 |



motif\_444

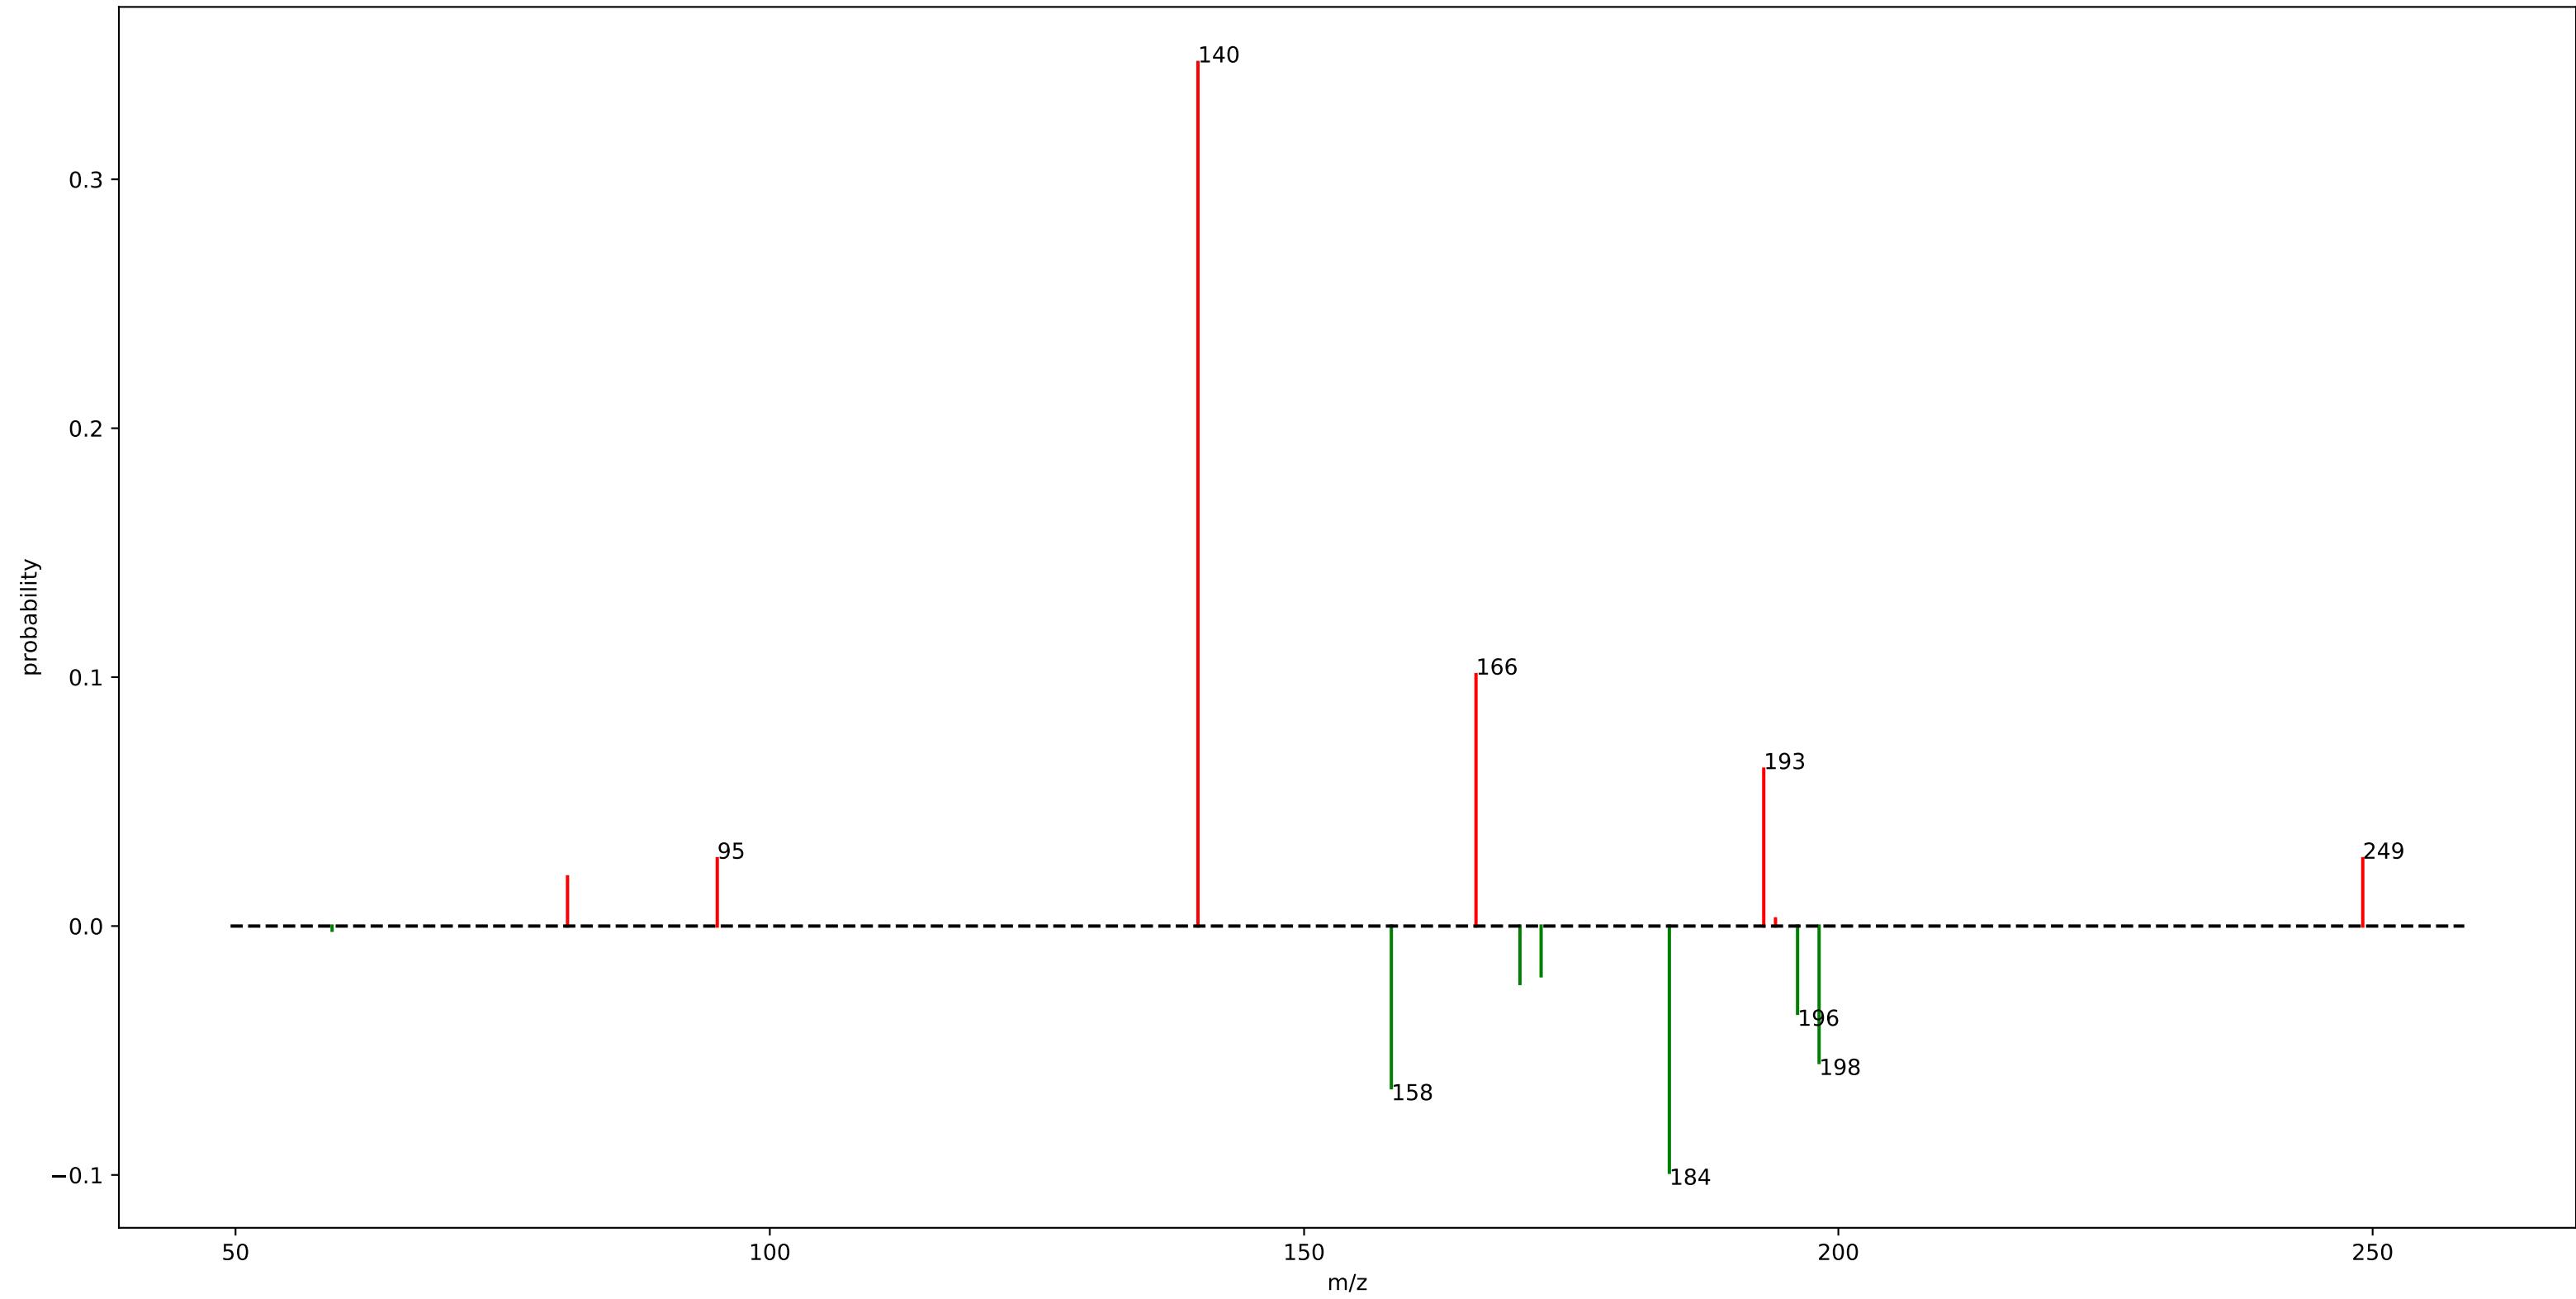

## motif\_444

|                   |        |
|-------------------|--------|
| fragment_140.0675 | : 0.35 |
| fragment_166.0875 | : 0.10 |
| loss_184.1825     | : 0.10 |
| loss_158.1675     | : 0.06 |
| fragment_193.0175 | : 0.06 |
| loss_198.1975     | : 0.05 |
| loss_196.1825     | : 0.04 |
| fragment_249.0775 | : 0.03 |
| fragment_95.0825  | : 0.03 |
| loss_170.2025     | : 0.02 |
| loss_172.1825     | : 0.02 |
| fragment_81.0675  | : 0.02 |

motif\_604

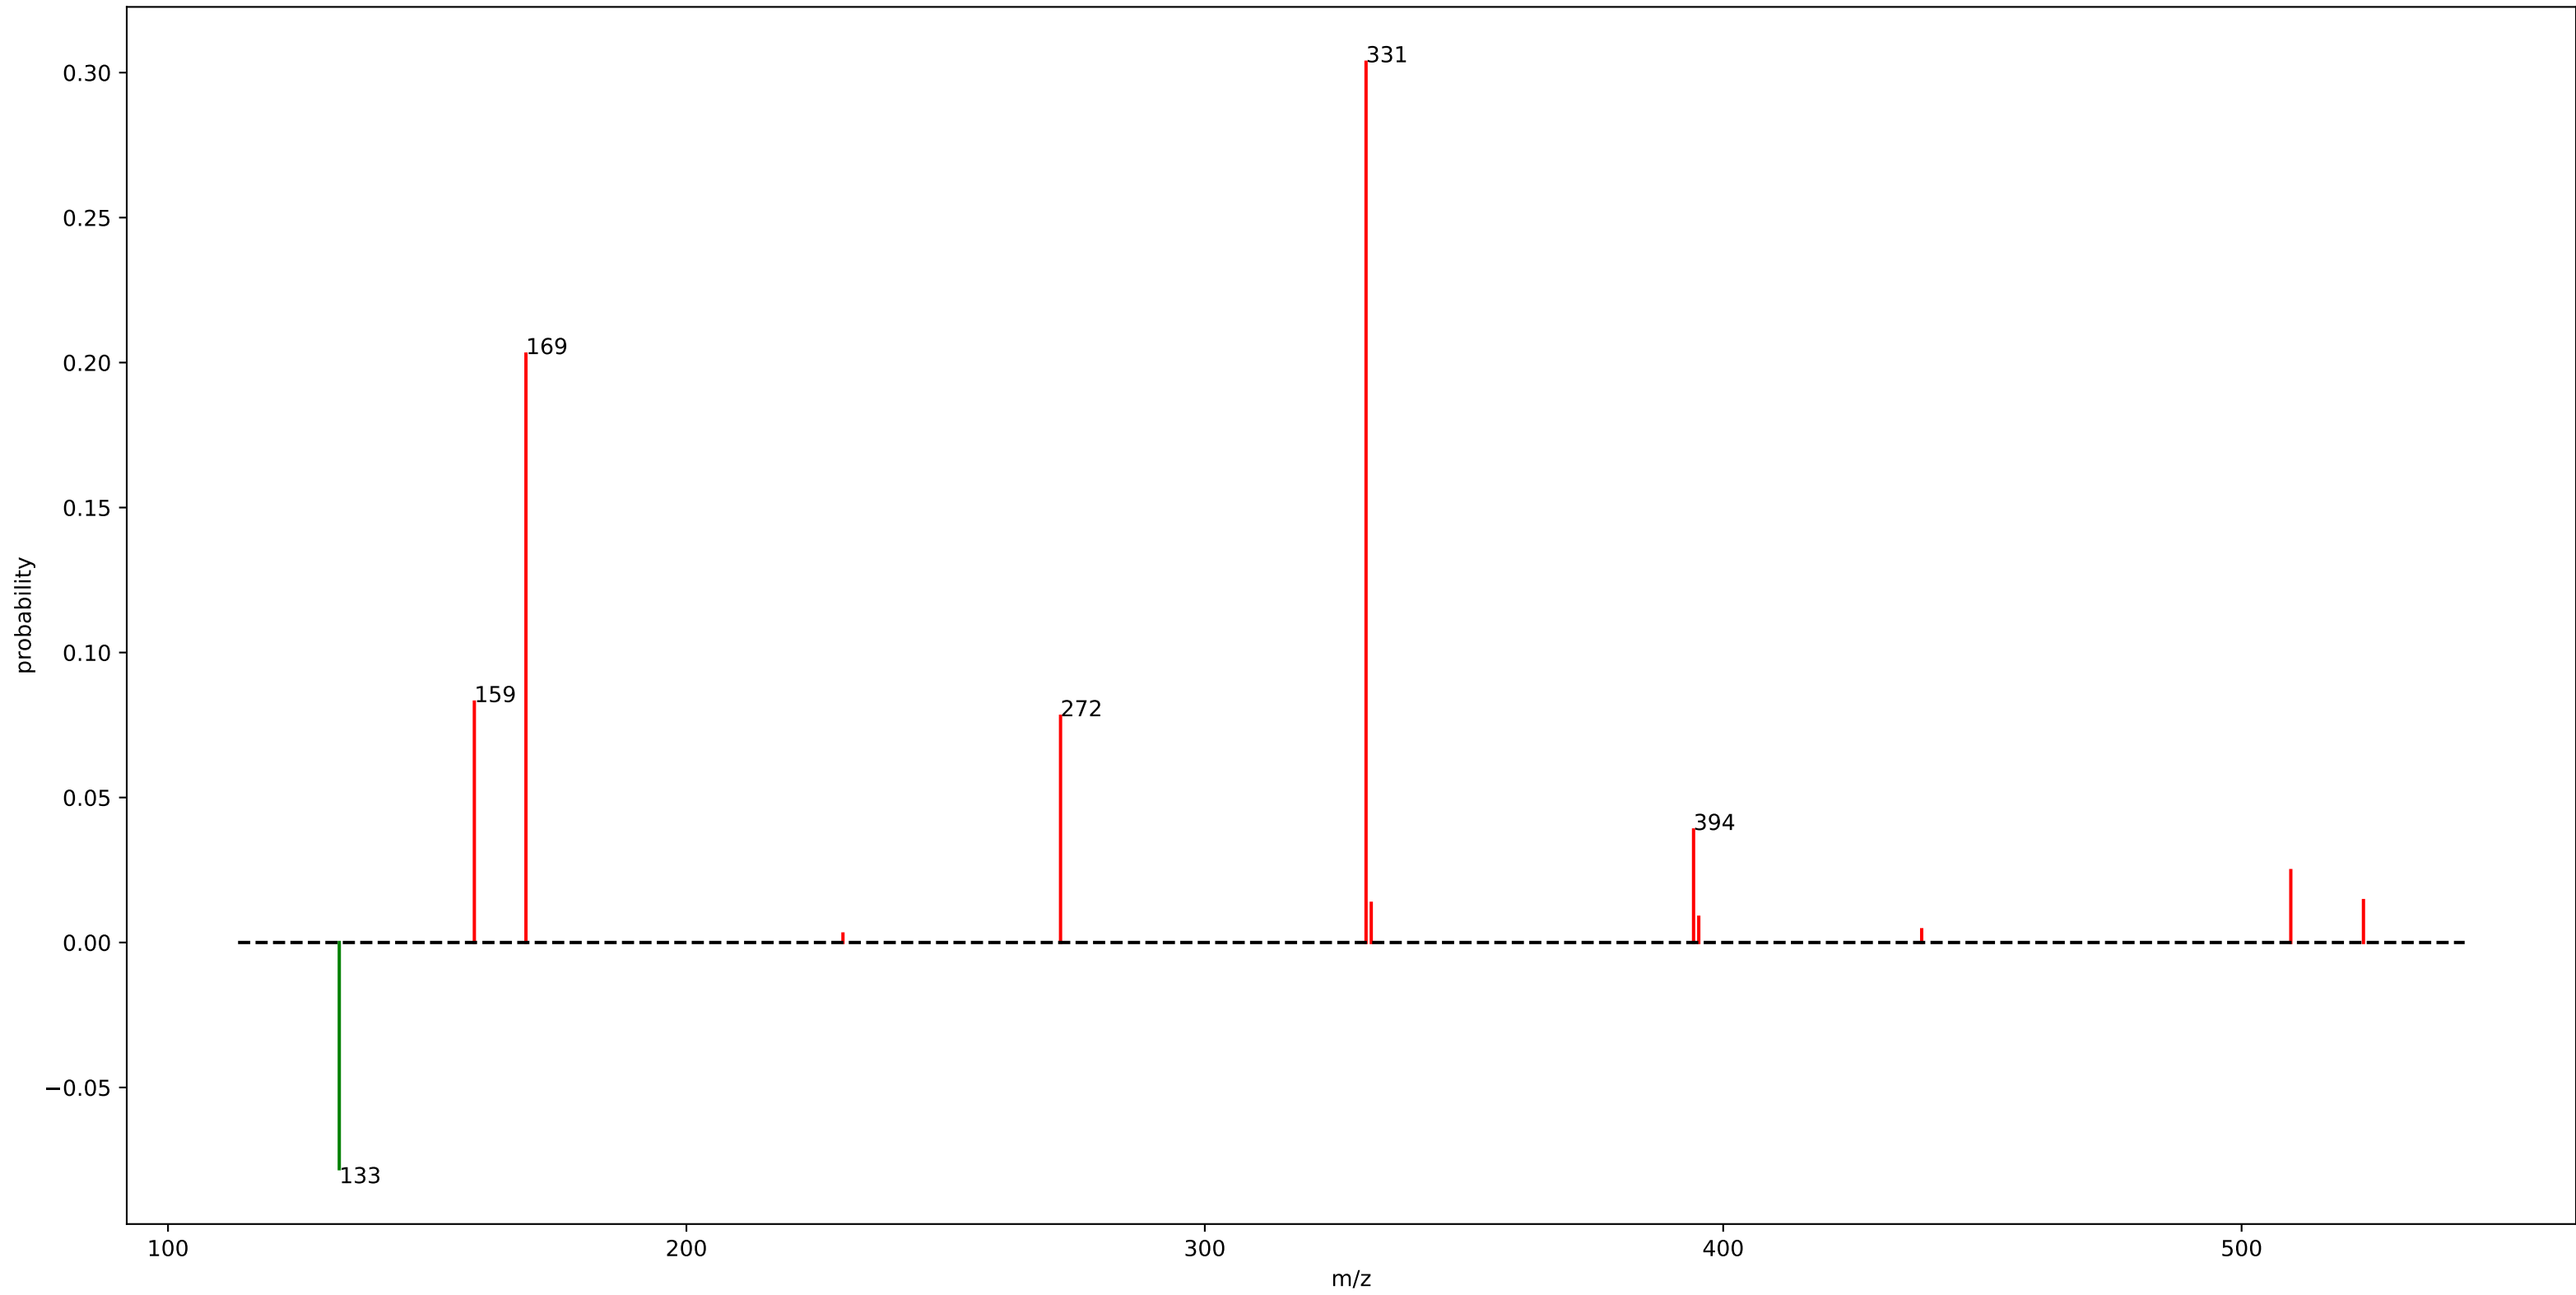

## motif\_604

|                   |        |
|-------------------|--------|
| fragment_331.1025 | : 0.30 |
| fragment_169.0475 | : 0.20 |
| fragment_159.0925 | : 0.08 |
| fragment_272.1725 | : 0.08 |
| loss_133.0375     | : 0.08 |
| fragment_394.2825 | : 0.04 |
| fragment_509.4925 | : 0.02 |
| fragment_523.5075 | : 0.01 |
| fragment_332.1075 | : 0.01 |
| fragment_395.2875 | : 0.01 |

gnps\_motif\_37.m2m

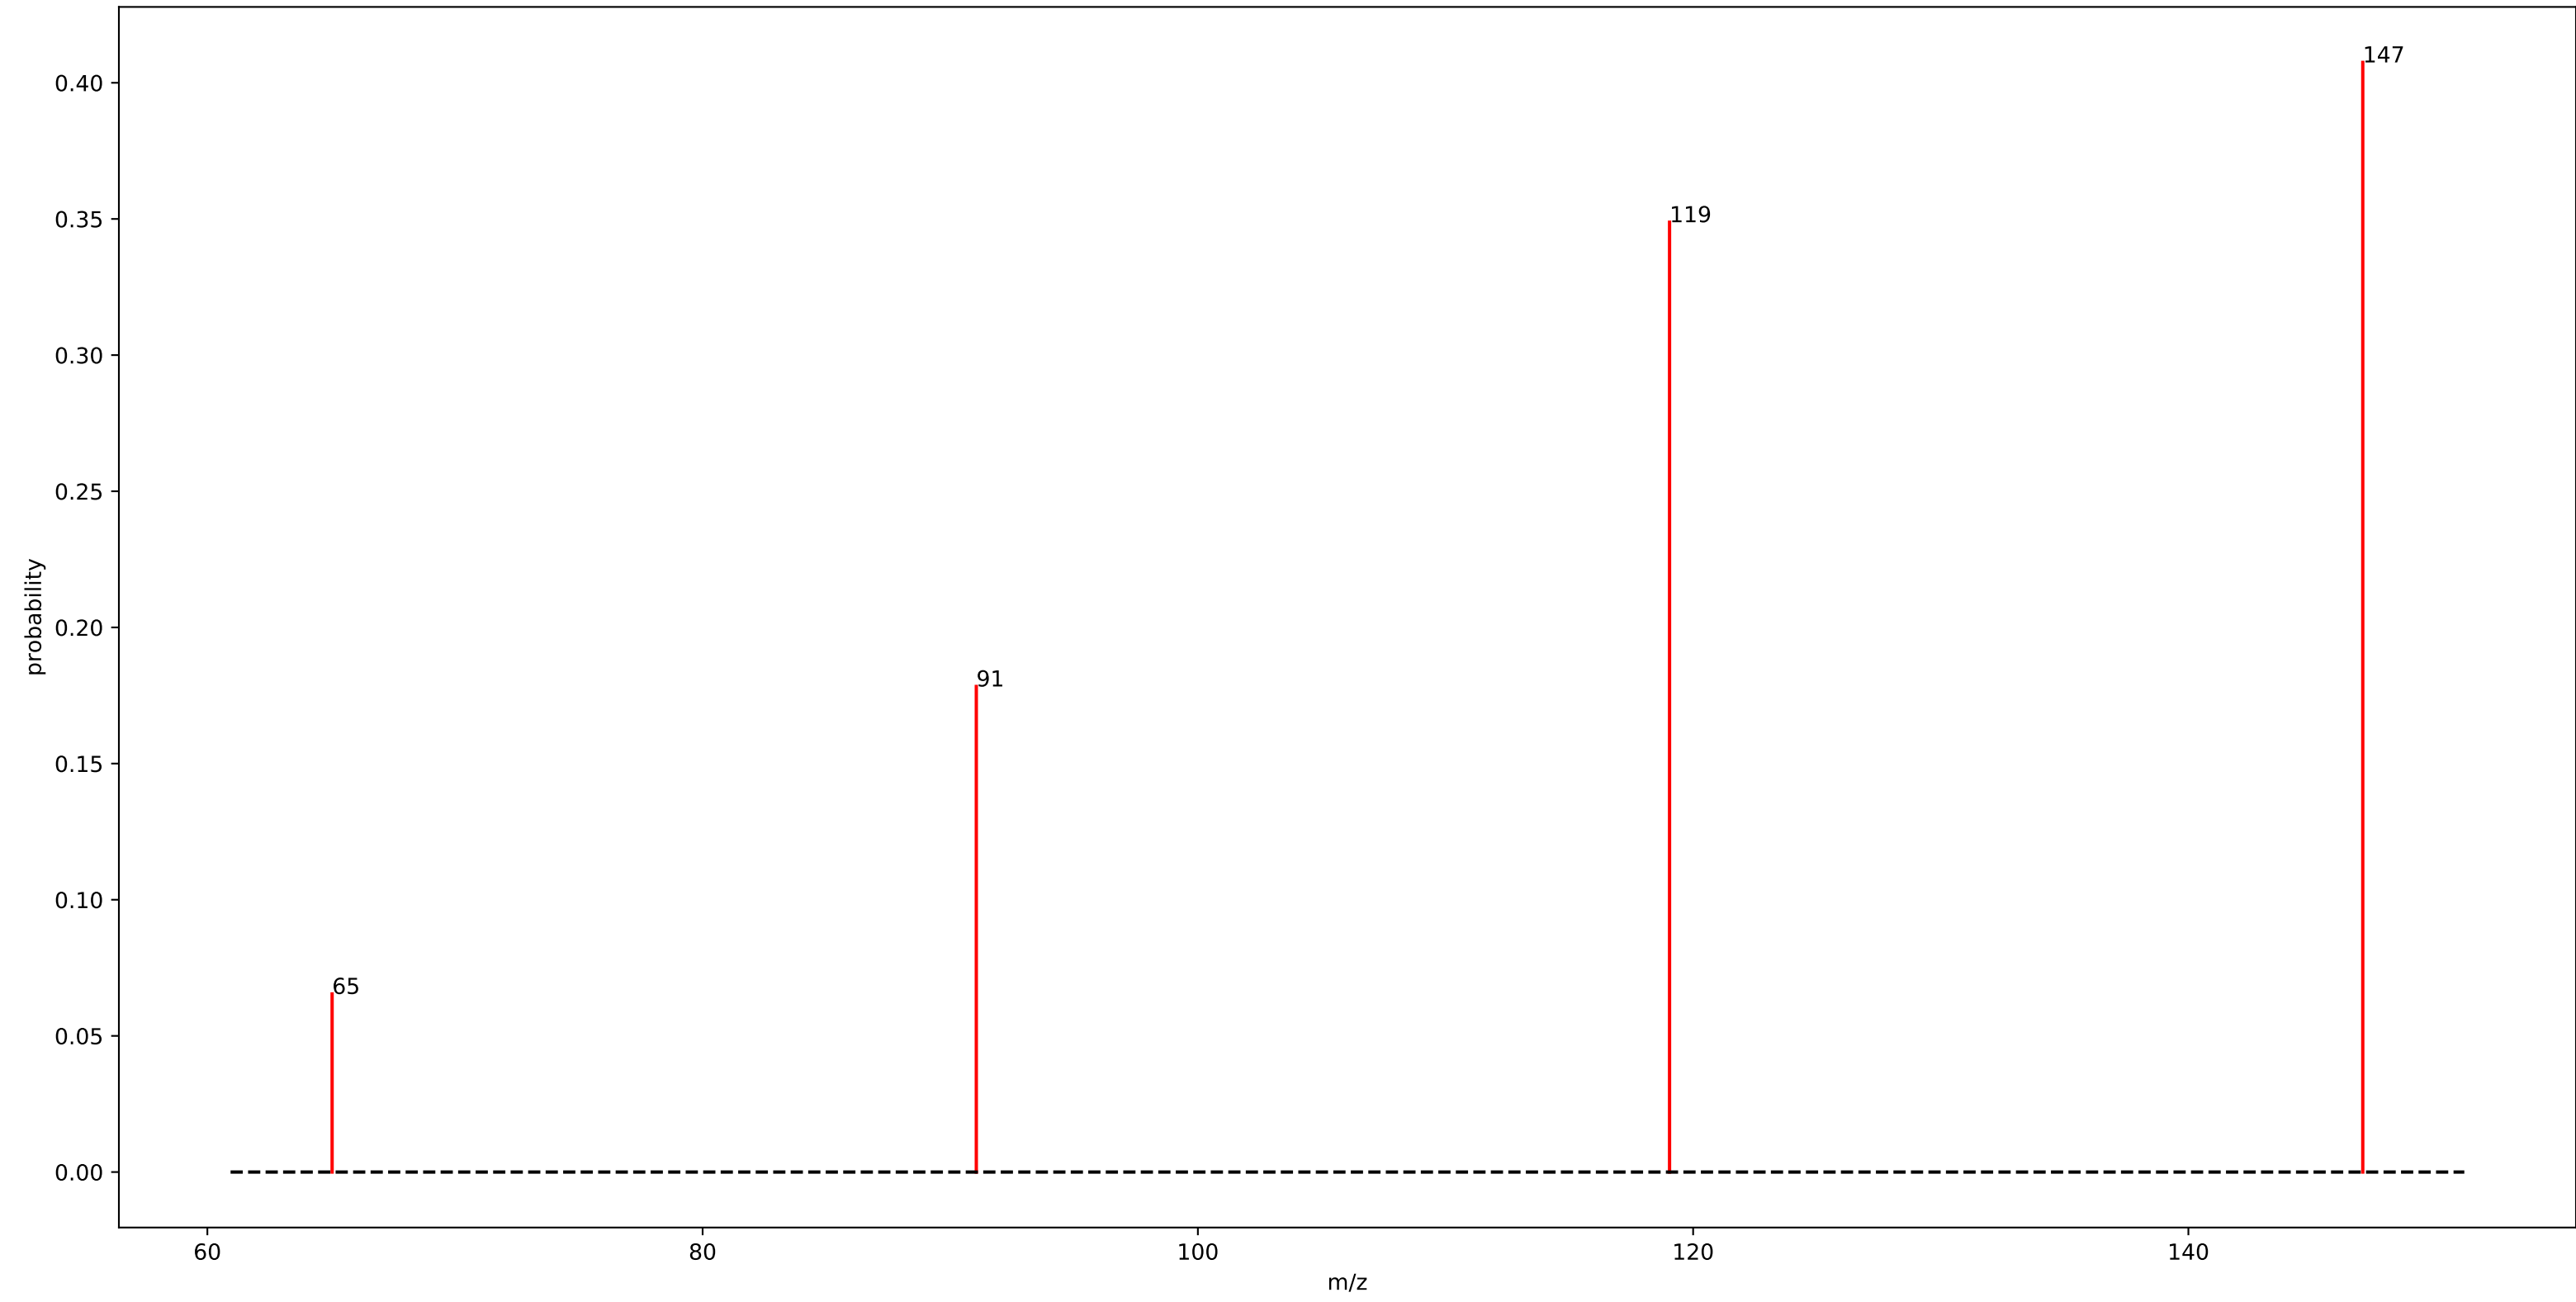

## gnps\_motif\_37.m2m

|                   |        |
|-------------------|--------|
| fragment_147.0425 | : 0.41 |
| fragment_119.0475 | : 0.35 |
| fragment_91.0525  | : 0.18 |
| fragment_65.0375  | : 0.07 |

rhabdus\_motif\_120.m2m

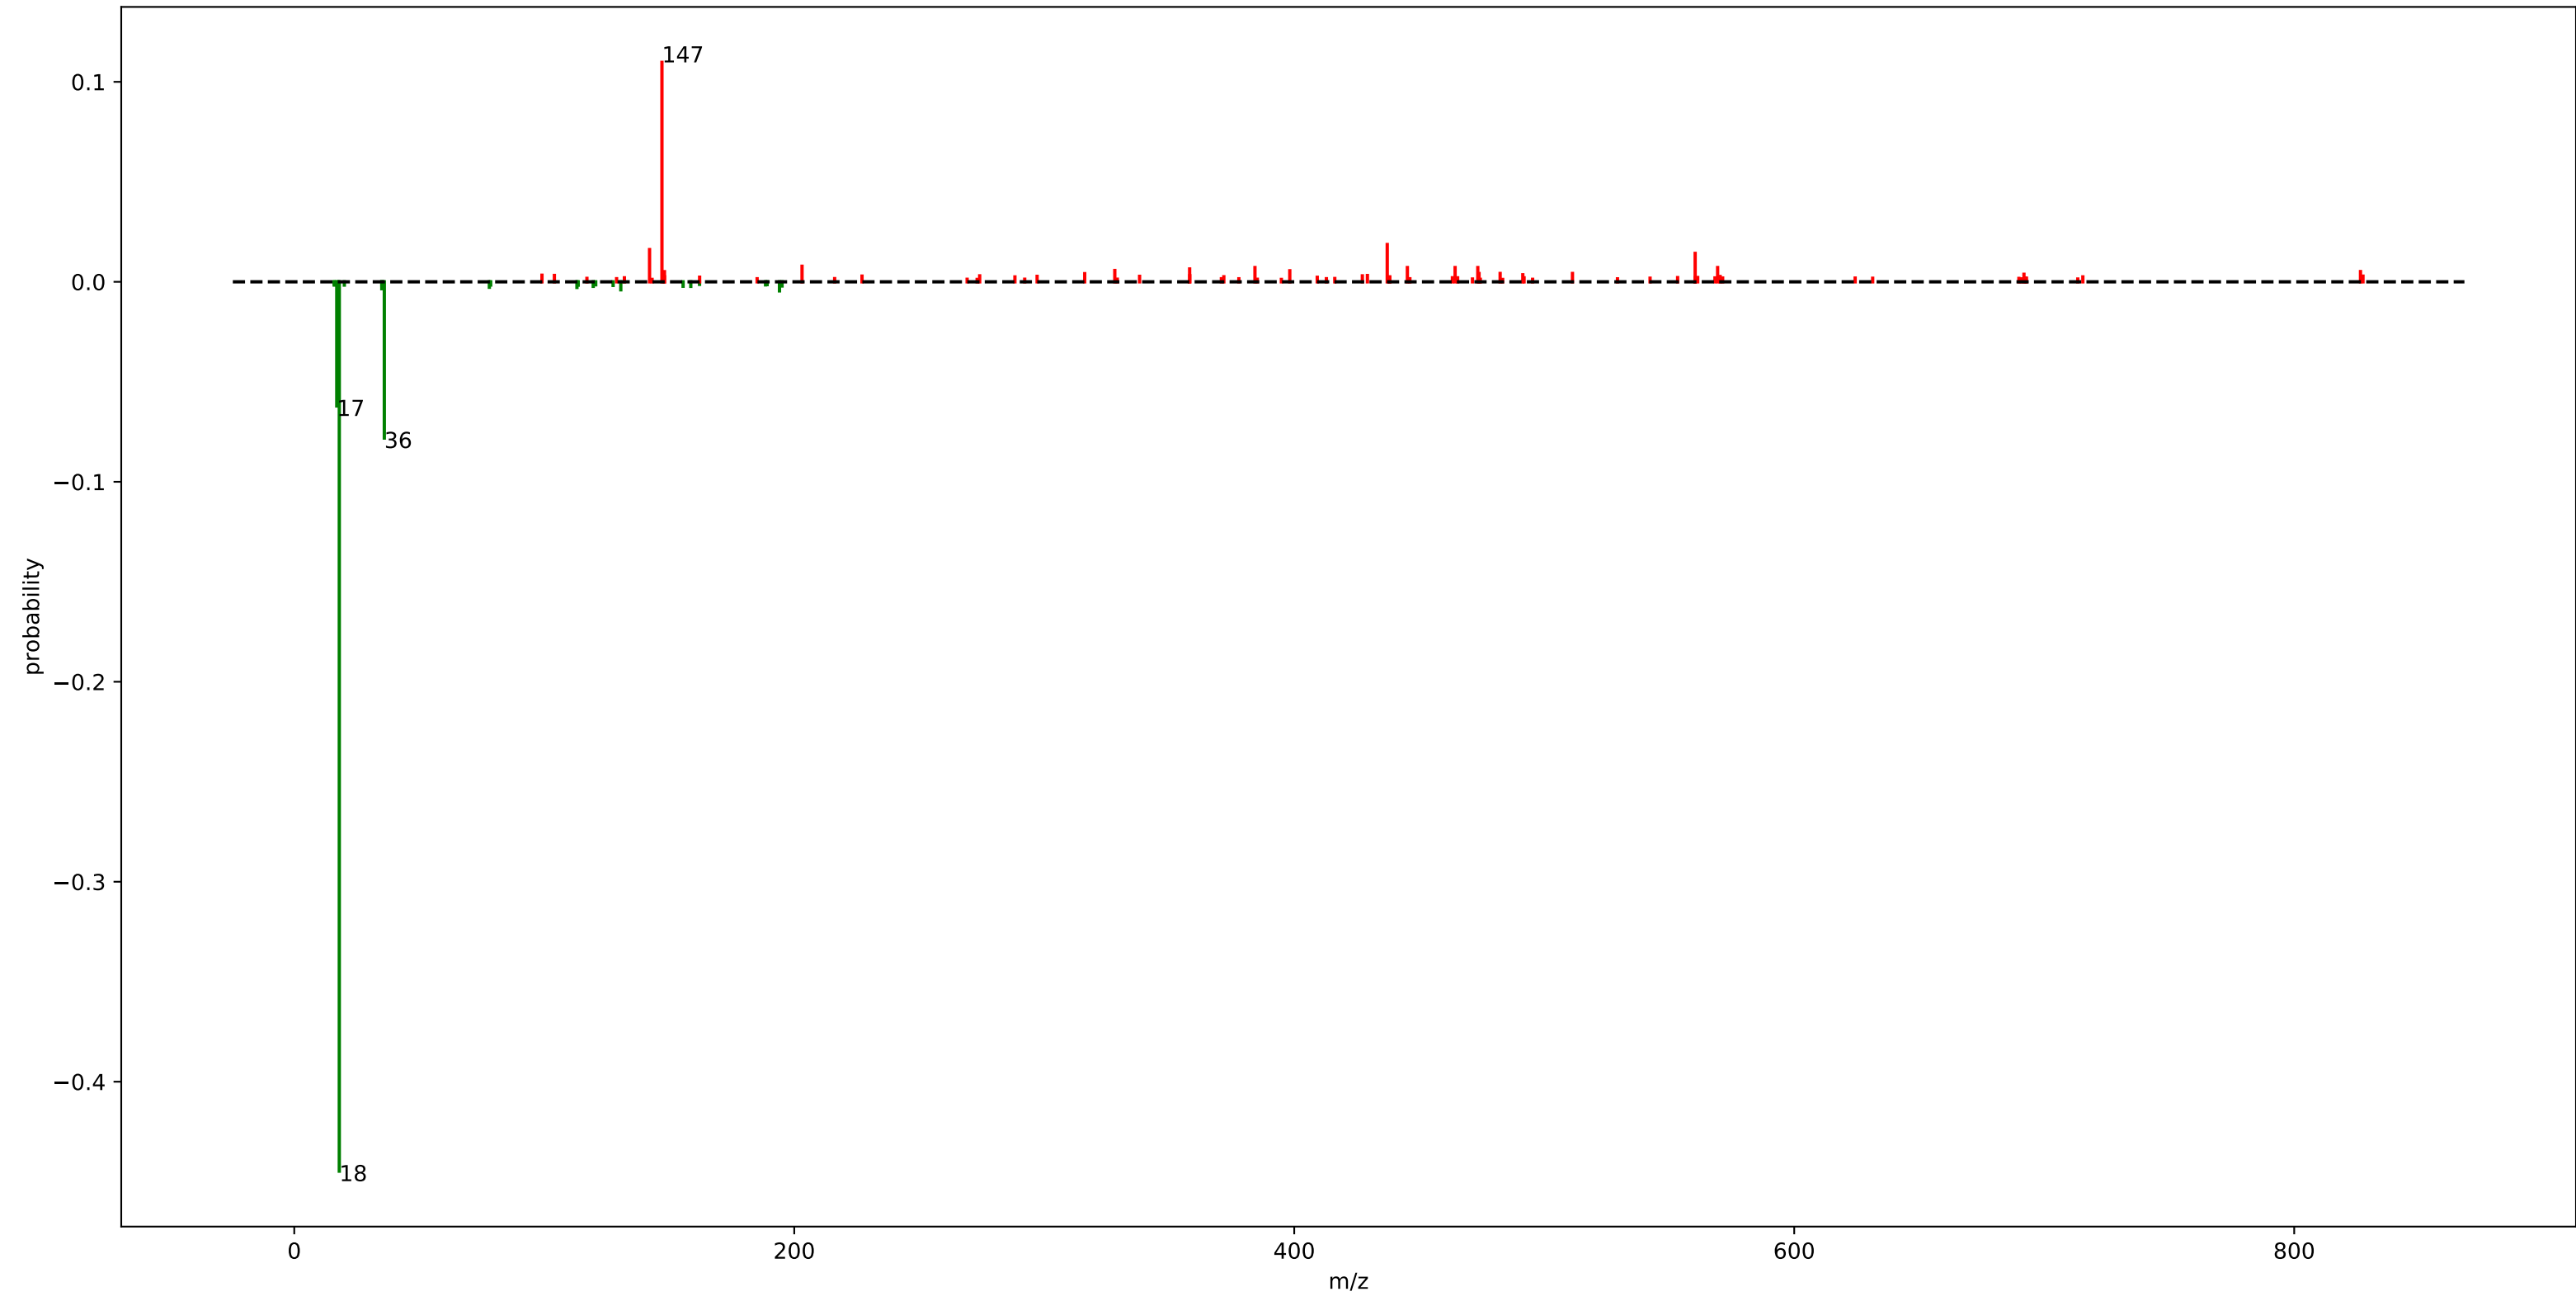

## rhabdus\_motif\_120.m2m

|                   |        |
|-------------------|--------|
| loss_18.0125      | : 0.44 |
| fragment_147.0775 | : 0.11 |
| loss_36.0225      | : 0.08 |
| loss_17.0075      | : 0.06 |
| fragment_437.2025 | : 0.02 |
| fragment_142.1225 | : 0.02 |
| fragment_560.3775 | : 0.01 |
| fragment_203.1175 | : 0.01 |
| fragment_464.3525 | : 0.01 |
| fragment_473.4275 | : 0.01 |
| fragment_384.2875 | : 0.01 |
| fragment_445.2575 | : 0.01 |
| fragment_569.3625 | : 0.01 |
| fragment_358.1625 | : 0.01 |
| fragment_328.2225 | : 0.01 |
| fragment_398.2225 | : 0.01 |
| loss_17.5075      | : 0.01 |
| fragment_826.5125 | : 0.01 |
| fragment_148.0825 | : 0.01 |



euphorbia\_motif\_297.m2m

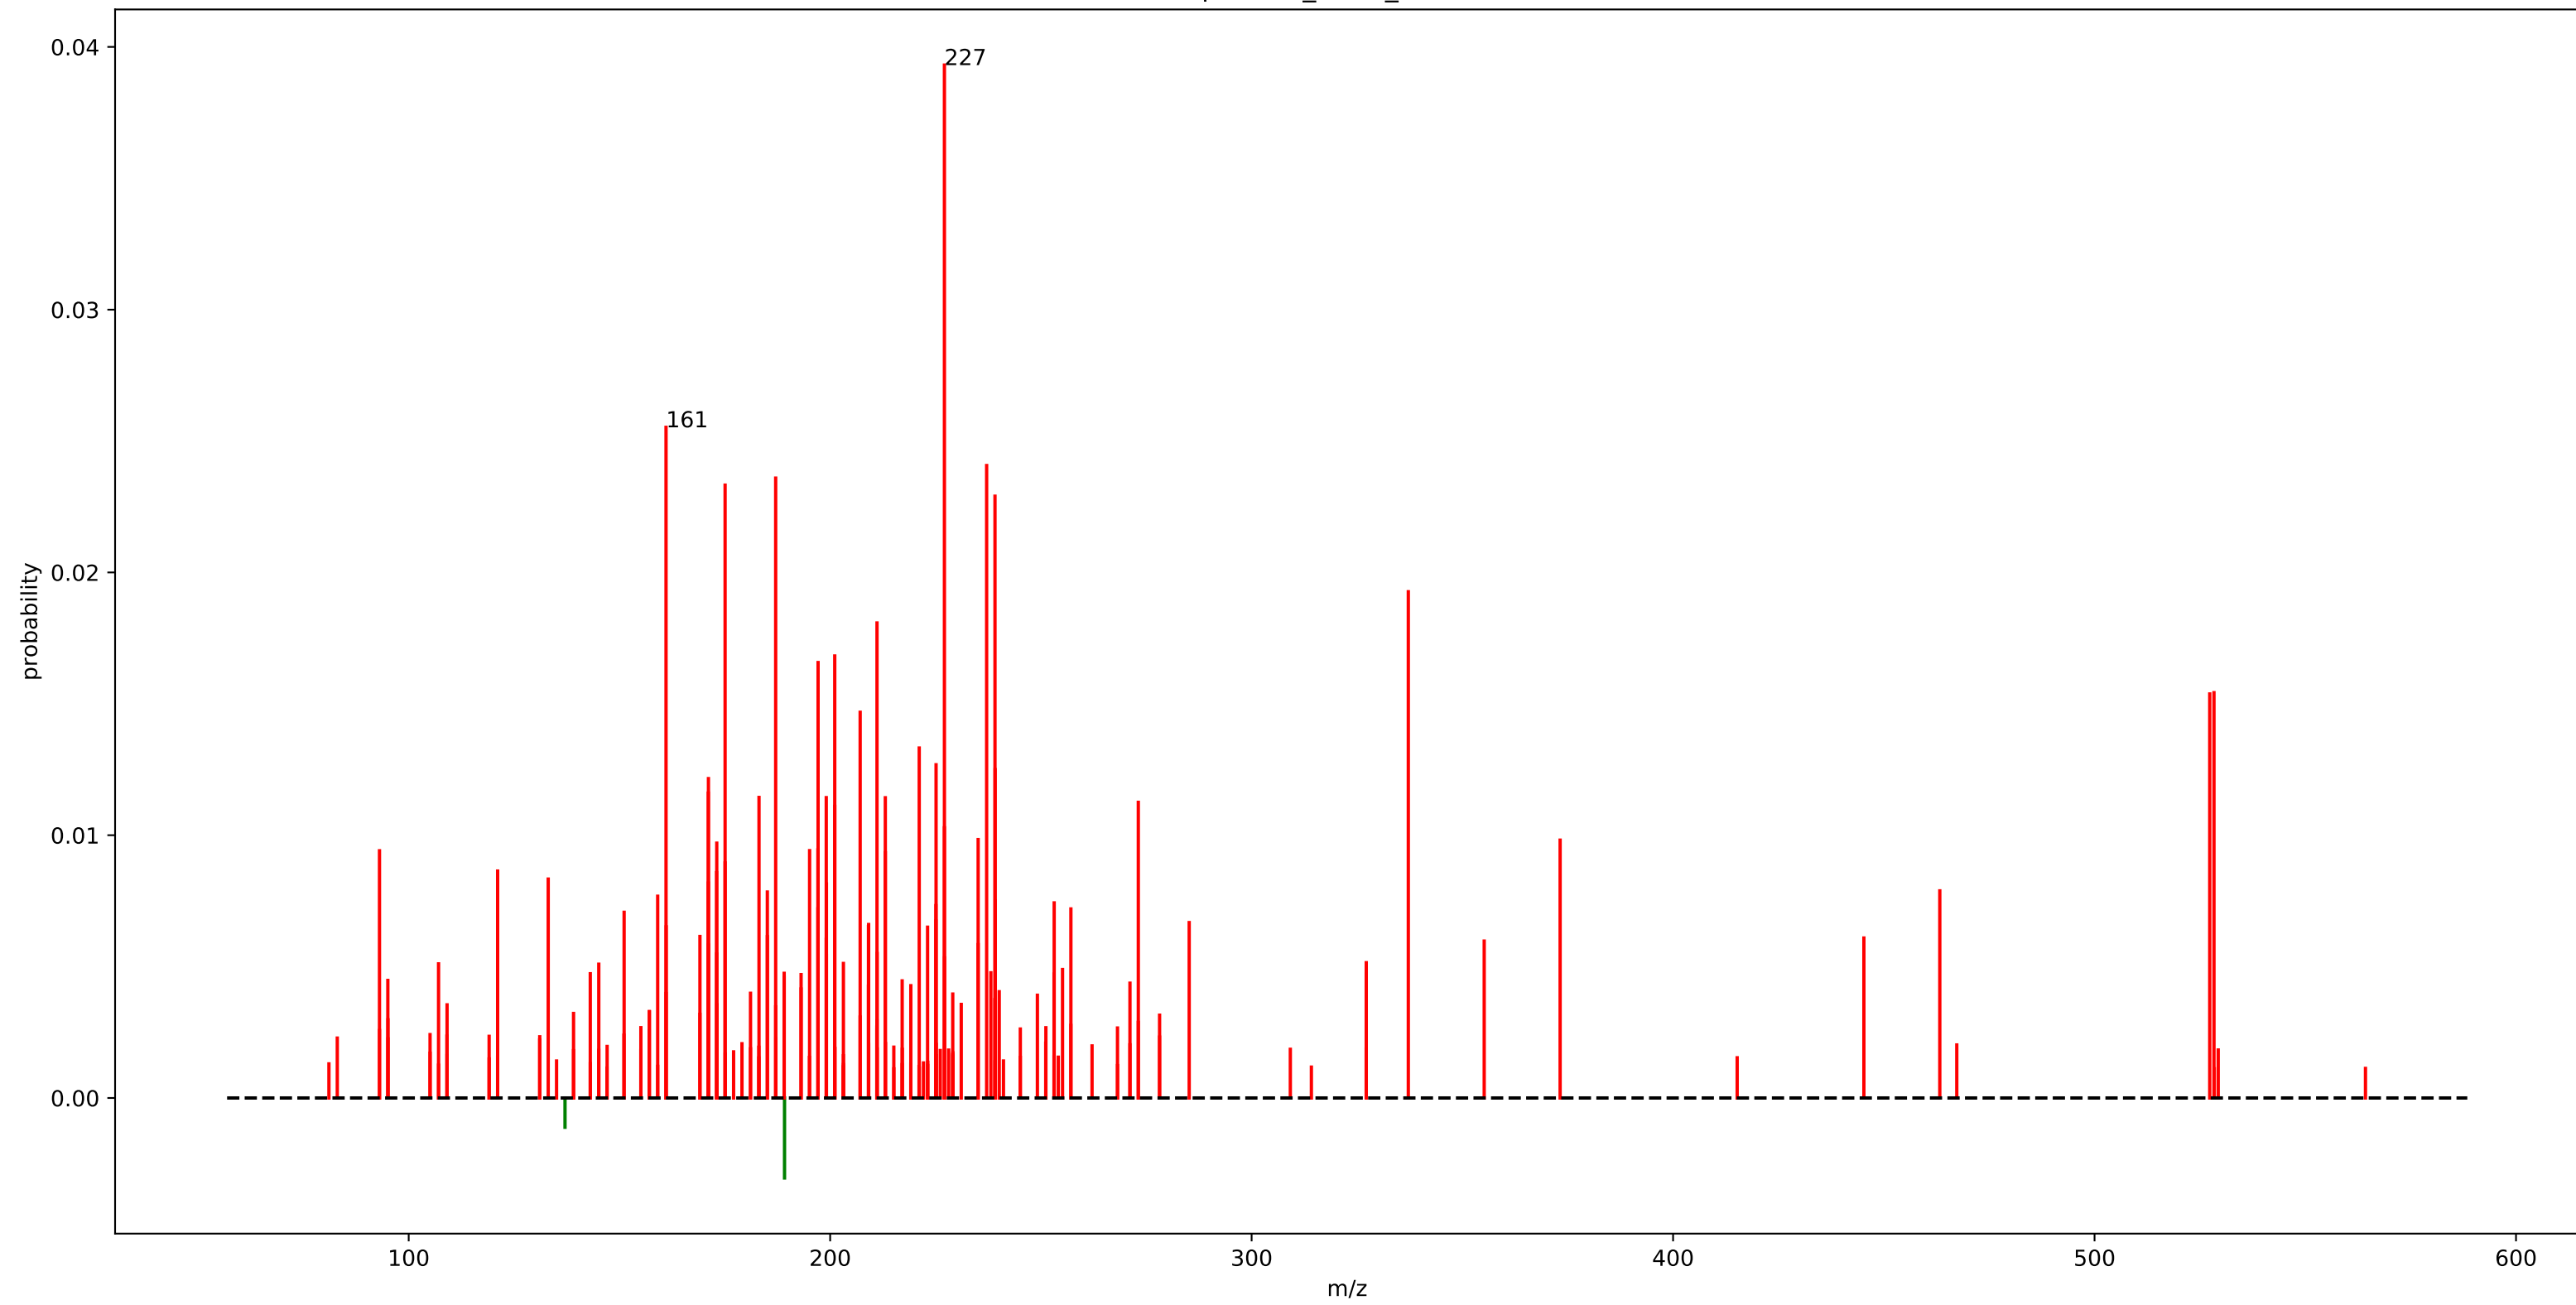

# euphorbia\_motif\_297.m2m

|                   |        |                   |        |                   |        |                   |        |
|-------------------|--------|-------------------|--------|-------------------|--------|-------------------|--------|
| fragment_227.1075 | : 0.04 | fragment_213.0875 | : 0.01 | fragment_239.1775 | : 0.01 | fragment_173.0625 | : 0.01 |
| fragment_161.0575 | : 0.03 | fragment_273.1125 | : 0.01 | fragment_253.1525 | : 0.01 | fragment_199.1075 | : 0.01 |
| fragment_237.1275 | : 0.02 | fragment_201.0925 | : 0.01 | fragment_225.0875 | : 0.01 | fragment_227.1375 | : 0.01 |
| fragment_187.0725 | : 0.02 | fragment_227.1025 | : 0.01 | fragment_197.0975 | : 0.01 | fragment_327.1975 | : 0.01 |
| fragment_175.0725 | : 0.02 | fragment_235.1125 | : 0.01 | fragment_257.1175 | : 0.01 | fragment_203.1425 | : 0.01 |
| fragment_239.1075 | : 0.02 | fragment_373.1975 | : 0.01 | fragment_151.1125 | : 0.01 | fragment_107.0825 | : 0.01 |
| fragment_337.1775 | : 0.02 | fragment_173.0925 | : 0.01 | fragment_225.0925 | : 0.01 | fragment_145.1025 | : 0.01 |
| fragment_211.1125 | : 0.02 | fragment_197.0925 | : 0.01 | fragment_285.1875 | : 0.01 |                   |        |
| fragment_201.0875 | : 0.02 | fragment_195.1175 | : 0.01 | fragment_209.1275 | : 0.01 |                   |        |
| fragment_197.1325 | : 0.02 | fragment_93.0675  | : 0.01 | fragment_209.0925 | : 0.01 |                   |        |
| fragment_528.3375 | : 0.02 | fragment_213.0925 | : 0.01 | fragment_161.0925 | : 0.01 |                   |        |
| fragment_527.3325 | : 0.02 | fragment_175.0775 | : 0.01 | fragment_223.1125 | : 0.01 |                   |        |
| fragment_207.1175 | : 0.01 | fragment_121.1025 | : 0.01 | fragment_169.1025 | : 0.01 |                   |        |
| fragment_221.1325 | : 0.01 | fragment_173.0575 | : 0.01 | fragment_185.0975 | : 0.01 |                   |        |
| fragment_225.1275 | : 0.01 | fragment_133.1025 | : 0.01 | fragment_445.2725 | : 0.01 |                   |        |
| fragment_239.1425 | : 0.01 | fragment_171.0825 | : 0.01 | fragment_199.0775 | : 0.01 |                   |        |
| fragment_171.1175 | : 0.01 | fragment_199.1125 | : 0.01 | fragment_355.1825 | : 0.01 |                   |        |
| fragment_171.0775 | : 0.01 | fragment_463.2825 | : 0.01 | fragment_235.1075 | : 0.01 |                   |        |
| fragment_183.1175 | : 0.01 | fragment_185.0925 | : 0.01 | fragment_171.1125 | : 0.01 |                   |        |
| fragment_199.0725 | : 0.01 | fragment_159.0775 | : 0.01 | fragment_211.1475 | : 0.01 |                   |        |

gnps\_motif\_274.m2m

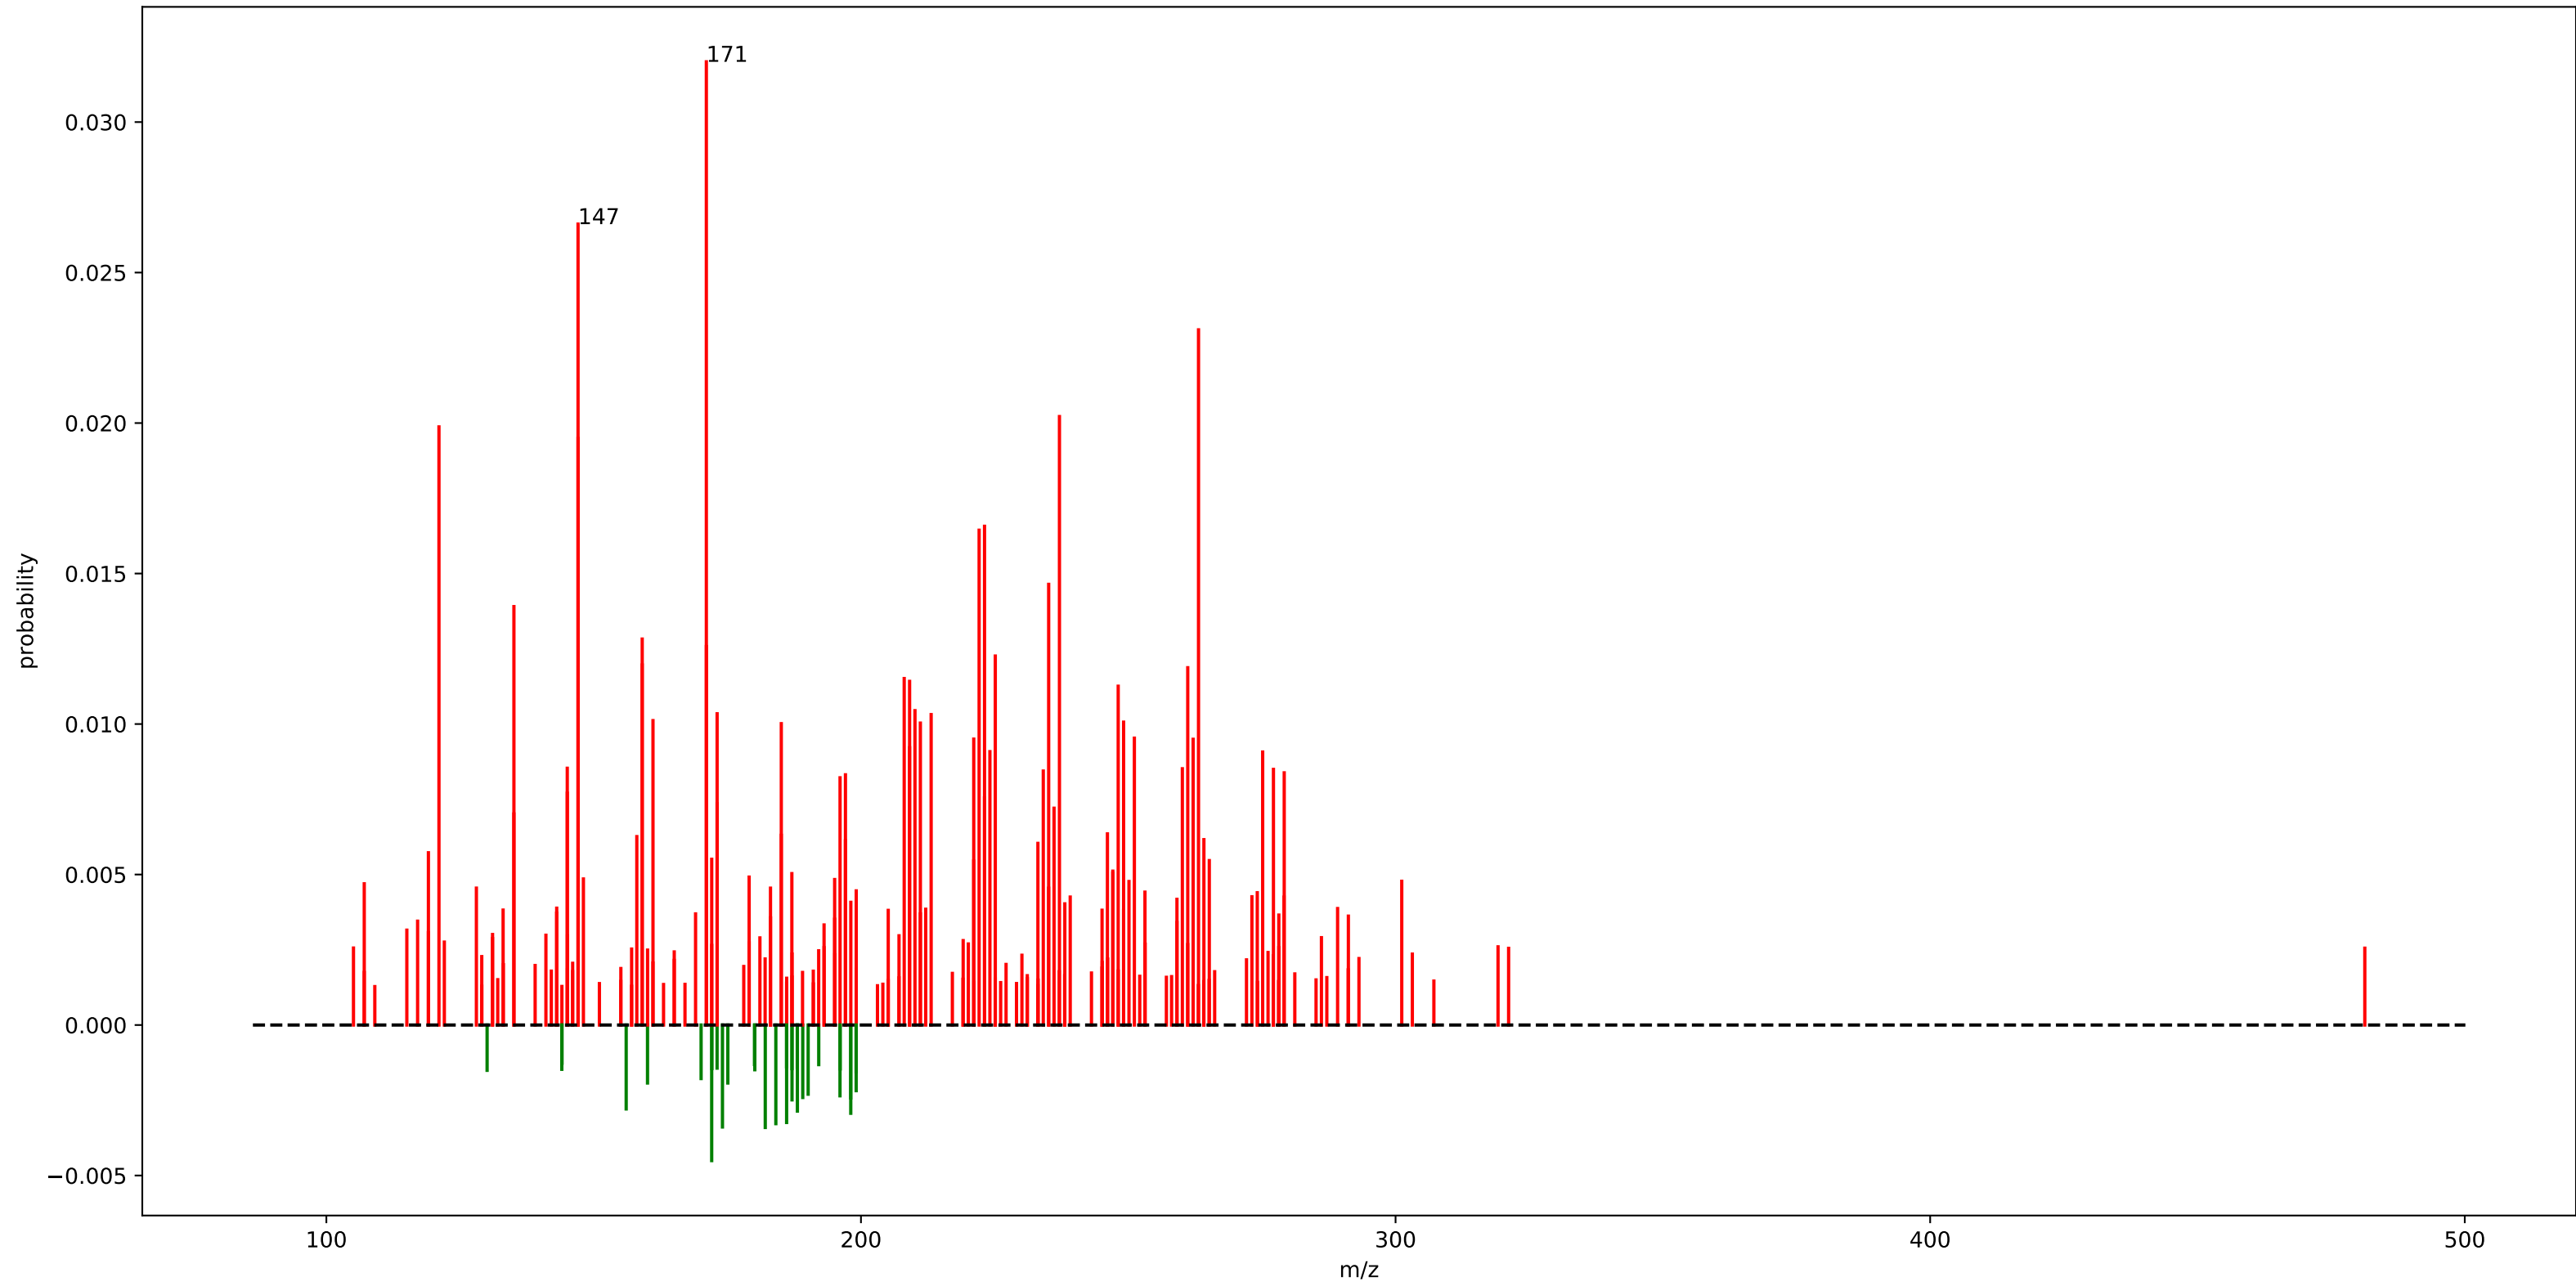

# gnps\_motif\_274.m2m

|                   |        |                   |        |                   |        |
|-------------------|--------|-------------------|--------|-------------------|--------|
| fragment_171.0775 | : 0.03 | fragment_213.1275 | : 0.01 | fragment_173.0975 | : 0.01 |
| fragment_147.0775 | : 0.03 | fragment_161.0975 | : 0.01 | fragment_236.1175 | : 0.01 |
| fragment_263.1425 | : 0.02 | fragment_249.1275 | : 0.01 | fragment_135.0775 | : 0.01 |
| fragment_237.1275 | : 0.02 | fragment_211.1125 | : 0.01 | fragment_246.1025 | : 0.01 |
| fragment_121.0625 | : 0.02 | fragment_185.0975 | : 0.01 | fragment_185.0925 | : 0.01 |
| fragment_147.0825 | : 0.02 | fragment_251.1425 | : 0.01 | fragment_158.0725 | : 0.01 |
| fragment_223.1125 | : 0.02 | fragment_221.0975 | : 0.01 | fragment_264.1475 | : 0.01 |
| fragment_222.1025 | : 0.02 | fragment_262.1325 | : 0.01 | fragment_197.0925 | : 0.01 |
| fragment_235.1125 | : 0.01 | fragment_209.0925 | : 0.01 | fragment_233.0975 | : 0.01 |
| fragment_135.0825 | : 0.01 | fragment_224.1175 | : 0.01 | fragment_119.0875 | : 0.01 |
| fragment_159.0825 | : 0.01 | fragment_275.1425 | : 0.01 | fragment_172.0825 | : 0.01 |
| fragment_171.0825 | : 0.01 | fragment_145.0625 | : 0.01 | fragment_265.1575 | : 0.01 |
| fragment_225.1275 | : 0.01 | fragment_260.1175 | : 0.01 | fragment_221.0925 | : 0.01 |
| fragment_159.0775 | : 0.01 | fragment_277.1575 | : 0.01 | fragment_247.1125 | : 0.01 |
| fragment_261.1275 | : 0.01 | fragment_234.1025 | : 0.01 | fragment_247.1075 | : 0.01 |
| fragment_208.0875 | : 0.01 | fragment_279.1725 | : 0.01 | fragment_187.0725 | : 0.01 |
| fragment_209.0975 | : 0.01 | fragment_197.0975 | : 0.01 |                   |        |
| fragment_248.1175 | : 0.01 | fragment_196.0875 | : 0.01 |                   |        |
| fragment_210.1025 | : 0.01 | fragment_145.0675 | : 0.01 |                   |        |
| fragment_173.0925 | : 0.01 | fragment_223.1075 | : 0.01 |                   |        |

euphorbia\_motif\_376.m2m

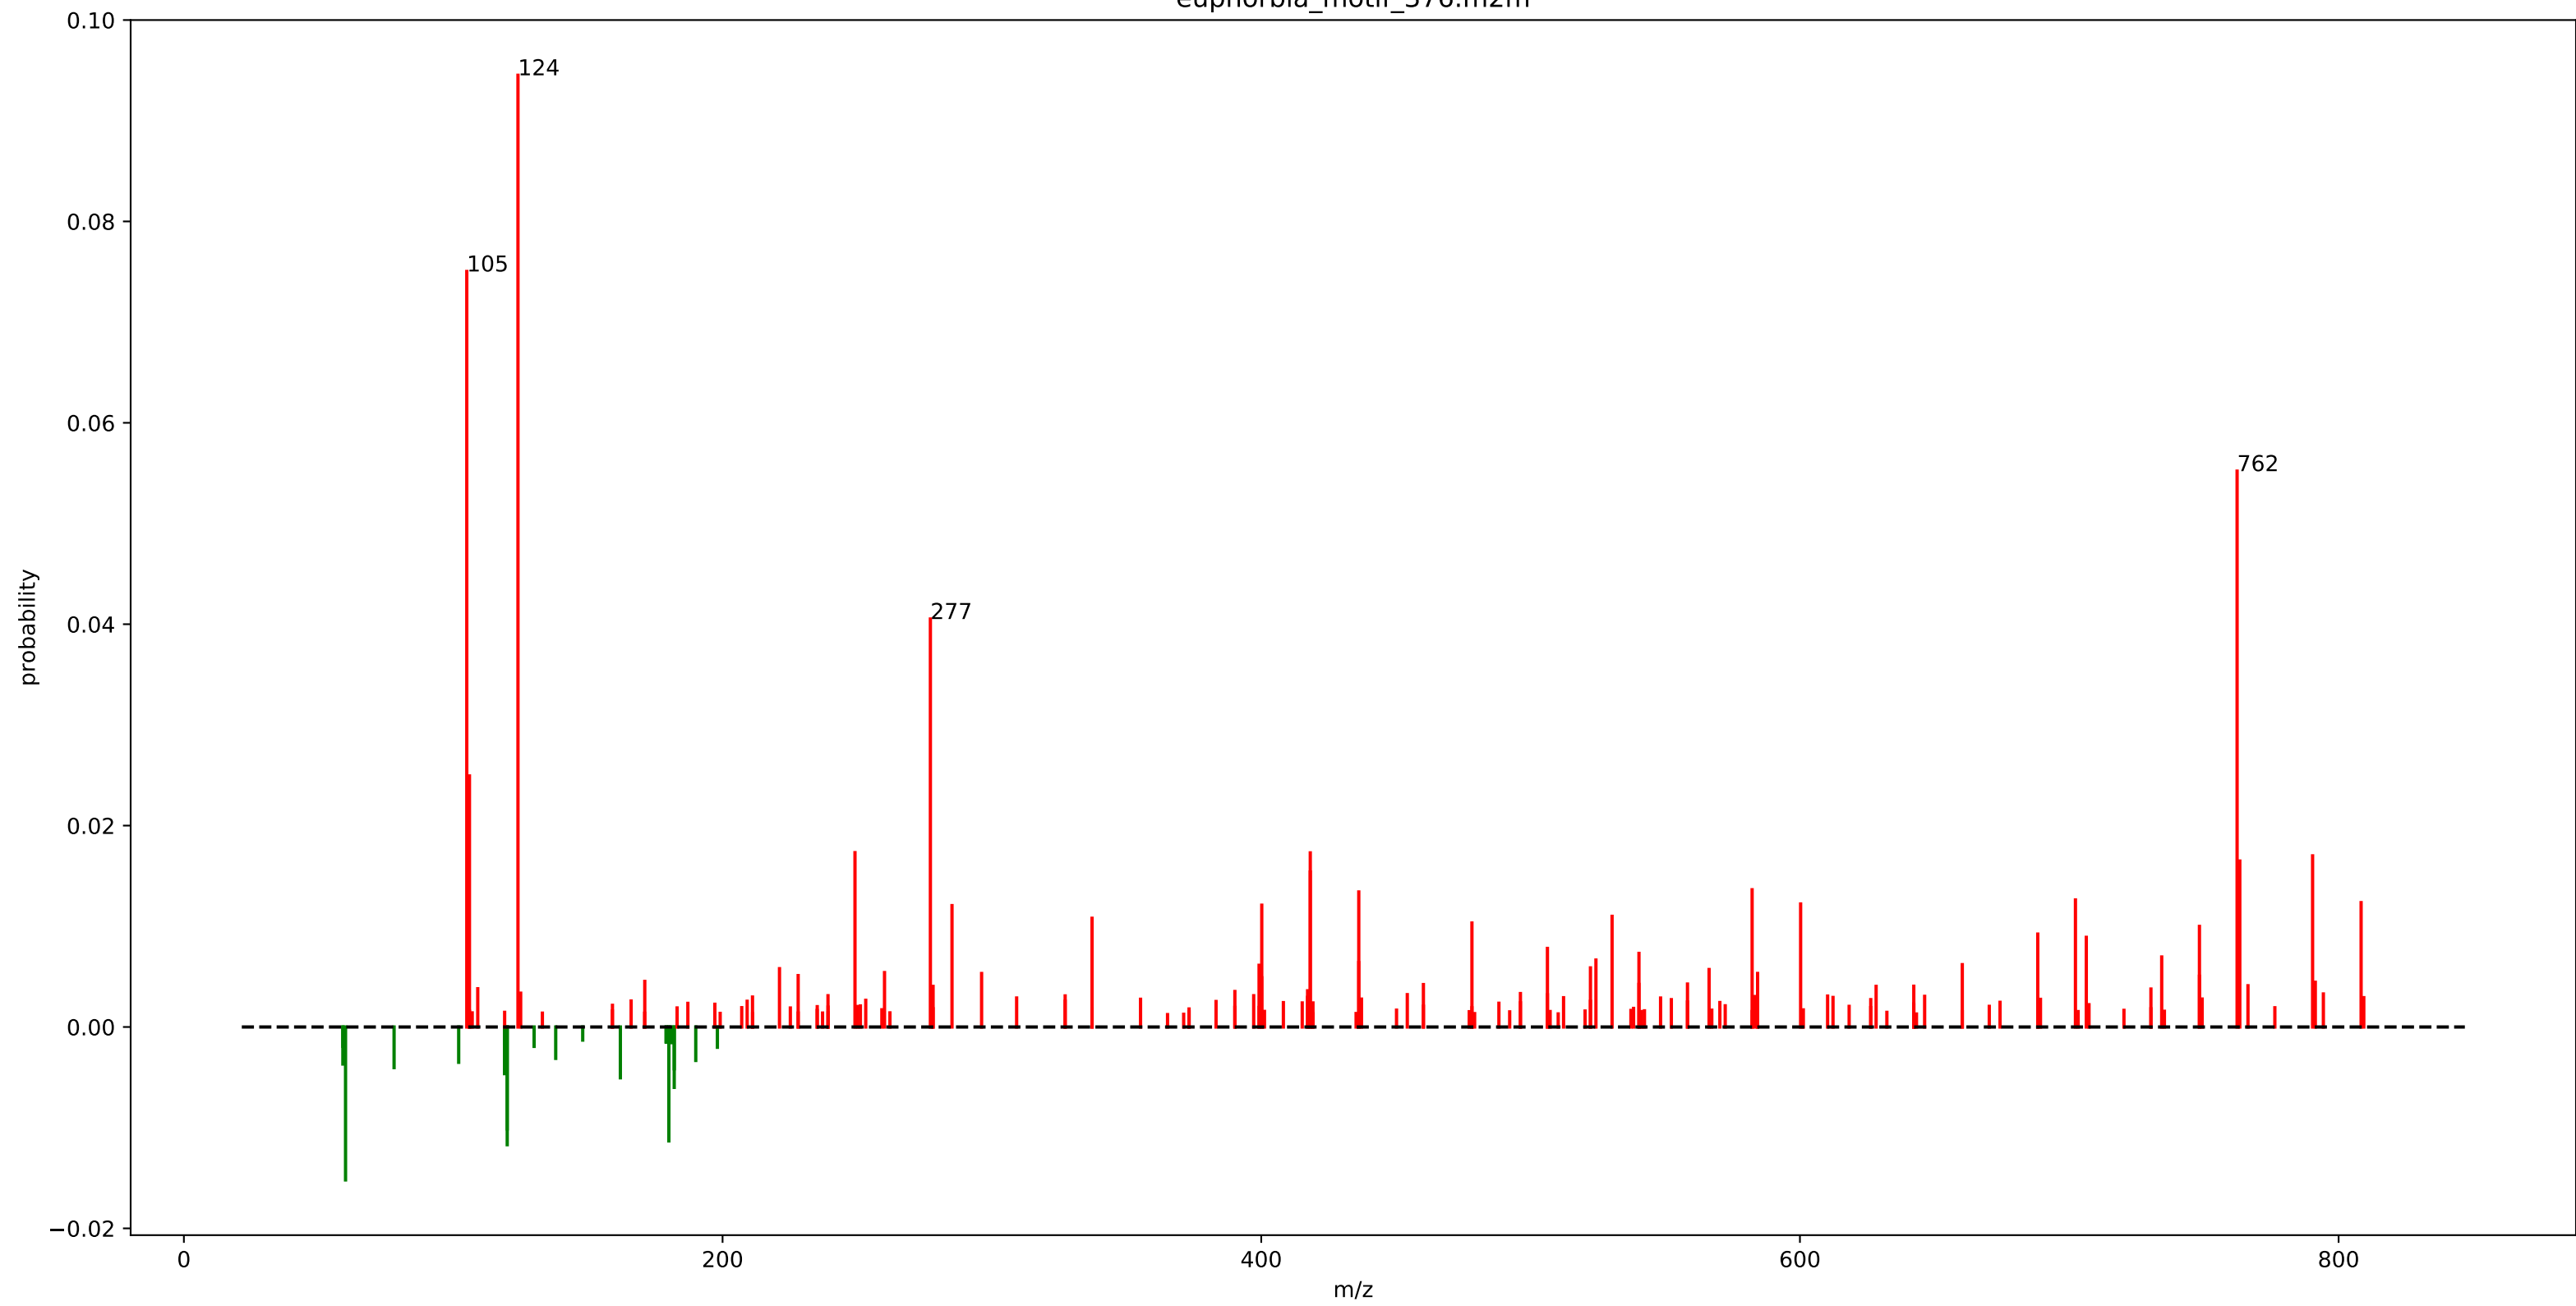

# euphorbia\_motif\_376.m2m

|                   |        |                   |        |                   |        |
|-------------------|--------|-------------------|--------|-------------------|--------|
| fragment_124.0375 | : 0.09 | fragment_530.2525 | : 0.01 | fragment_296.1725 | : 0.01 |
| fragment_105.0325 | : 0.08 | fragment_337.1775 | : 0.01 | fragment_584.2875 | : 0.01 |
| fragment_762.3125 | : 0.06 | fragment_478.2225 | : 0.01 | fragment_228.0675 | : 0.01 |
| fragment_277.1575 | : 0.04 | loss_120.0375     | : 0.01 | loss_162.0525     | : 0.01 |
| fragment_106.0275 | : 0.02 | fragment_748.3275 | : 0.01 | fragment_748.3325 | : 0.01 |
| fragment_249.1625 | : 0.02 | fragment_688.3075 | : 0.01 |                   |        |
| fragment_418.2025 | : 0.02 | fragment_706.3225 | : 0.01 |                   |        |
| fragment_790.3425 | : 0.02 | fragment_506.2525 | : 0.01 |                   |        |
| fragment_763.3175 | : 0.02 | fragment_540.2375 | : 0.01 |                   |        |
| fragment_418.1975 | : 0.02 | fragment_734.3175 | : 0.01 |                   |        |
| loss_60.0175      | : 0.02 | fragment_524.2625 | : 0.01 |                   |        |
| fragment_582.2475 | : 0.01 | fragment_436.2075 | : 0.01 |                   |        |
| fragment_436.2125 | : 0.01 | fragment_660.2825 | : 0.01 |                   |        |
| fragment_702.2925 | : 0.01 | fragment_399.1925 | : 0.01 |                   |        |
| fragment_808.3525 | : 0.01 | loss_182.0525     | : 0.01 |                   |        |
| fragment_600.2575 | : 0.01 | fragment_522.2275 | : 0.01 |                   |        |
| fragment_400.1925 | : 0.01 | fragment_221.1325 | : 0.01 |                   |        |
| fragment_285.1825 | : 0.01 | fragment_566.2725 | : 0.01 |                   |        |
| loss_120.0475     | : 0.01 | fragment_260.1275 | : 0.01 |                   |        |
| loss_180.0625     | : 0.01 | fragment_584.2825 | : 0.01 |                   |        |

mb\_motif\_42.m2m

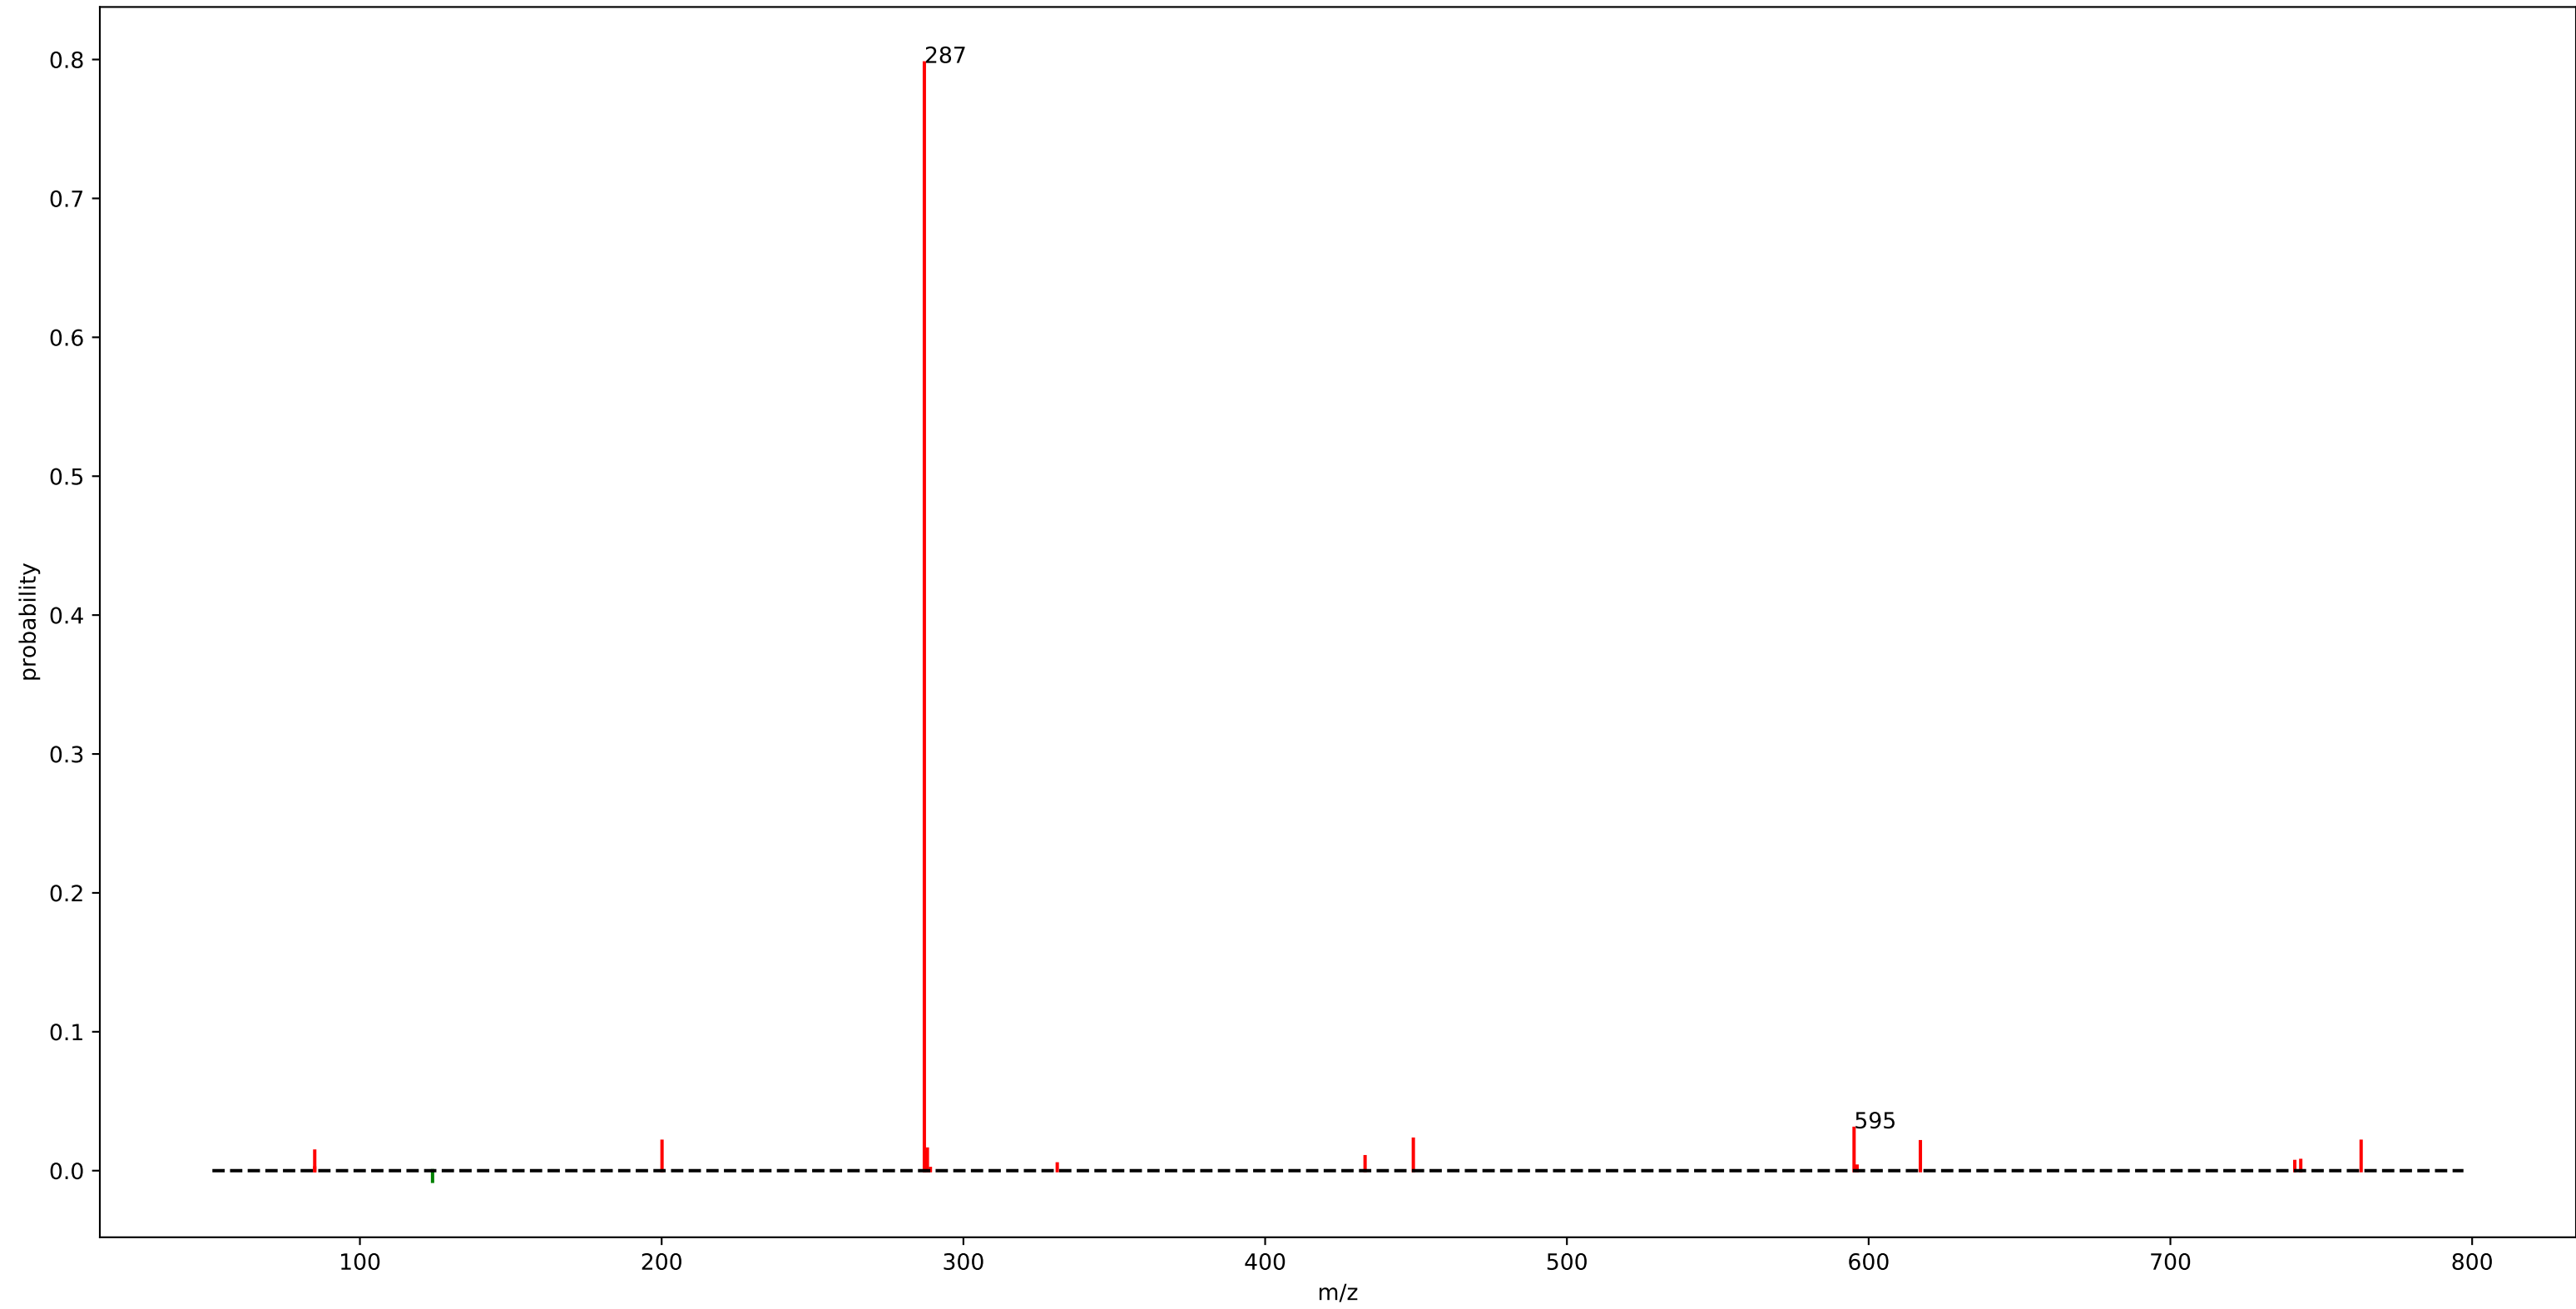

## mb\_motif\_42.m2m

|                   |        |
|-------------------|--------|
| fragment_287.0575 | : 0.80 |
| fragment_595.1675 | : 0.03 |
| fragment_449.1075 | : 0.02 |
| fragment_763.2075 | : 0.02 |
| fragment_200.1175 | : 0.02 |
| fragment_617.1475 | : 0.02 |
| fragment_288.0575 | : 0.02 |
| fragment_85.0275  | : 0.01 |
| fragment_287.1425 | : 0.01 |
| fragment_433.1125 | : 0.01 |
| loss_124.0725     | : 0.01 |
| fragment_743.2025 | : 0.01 |
| fragment_741.2225 | : 0.01 |



motif\_429

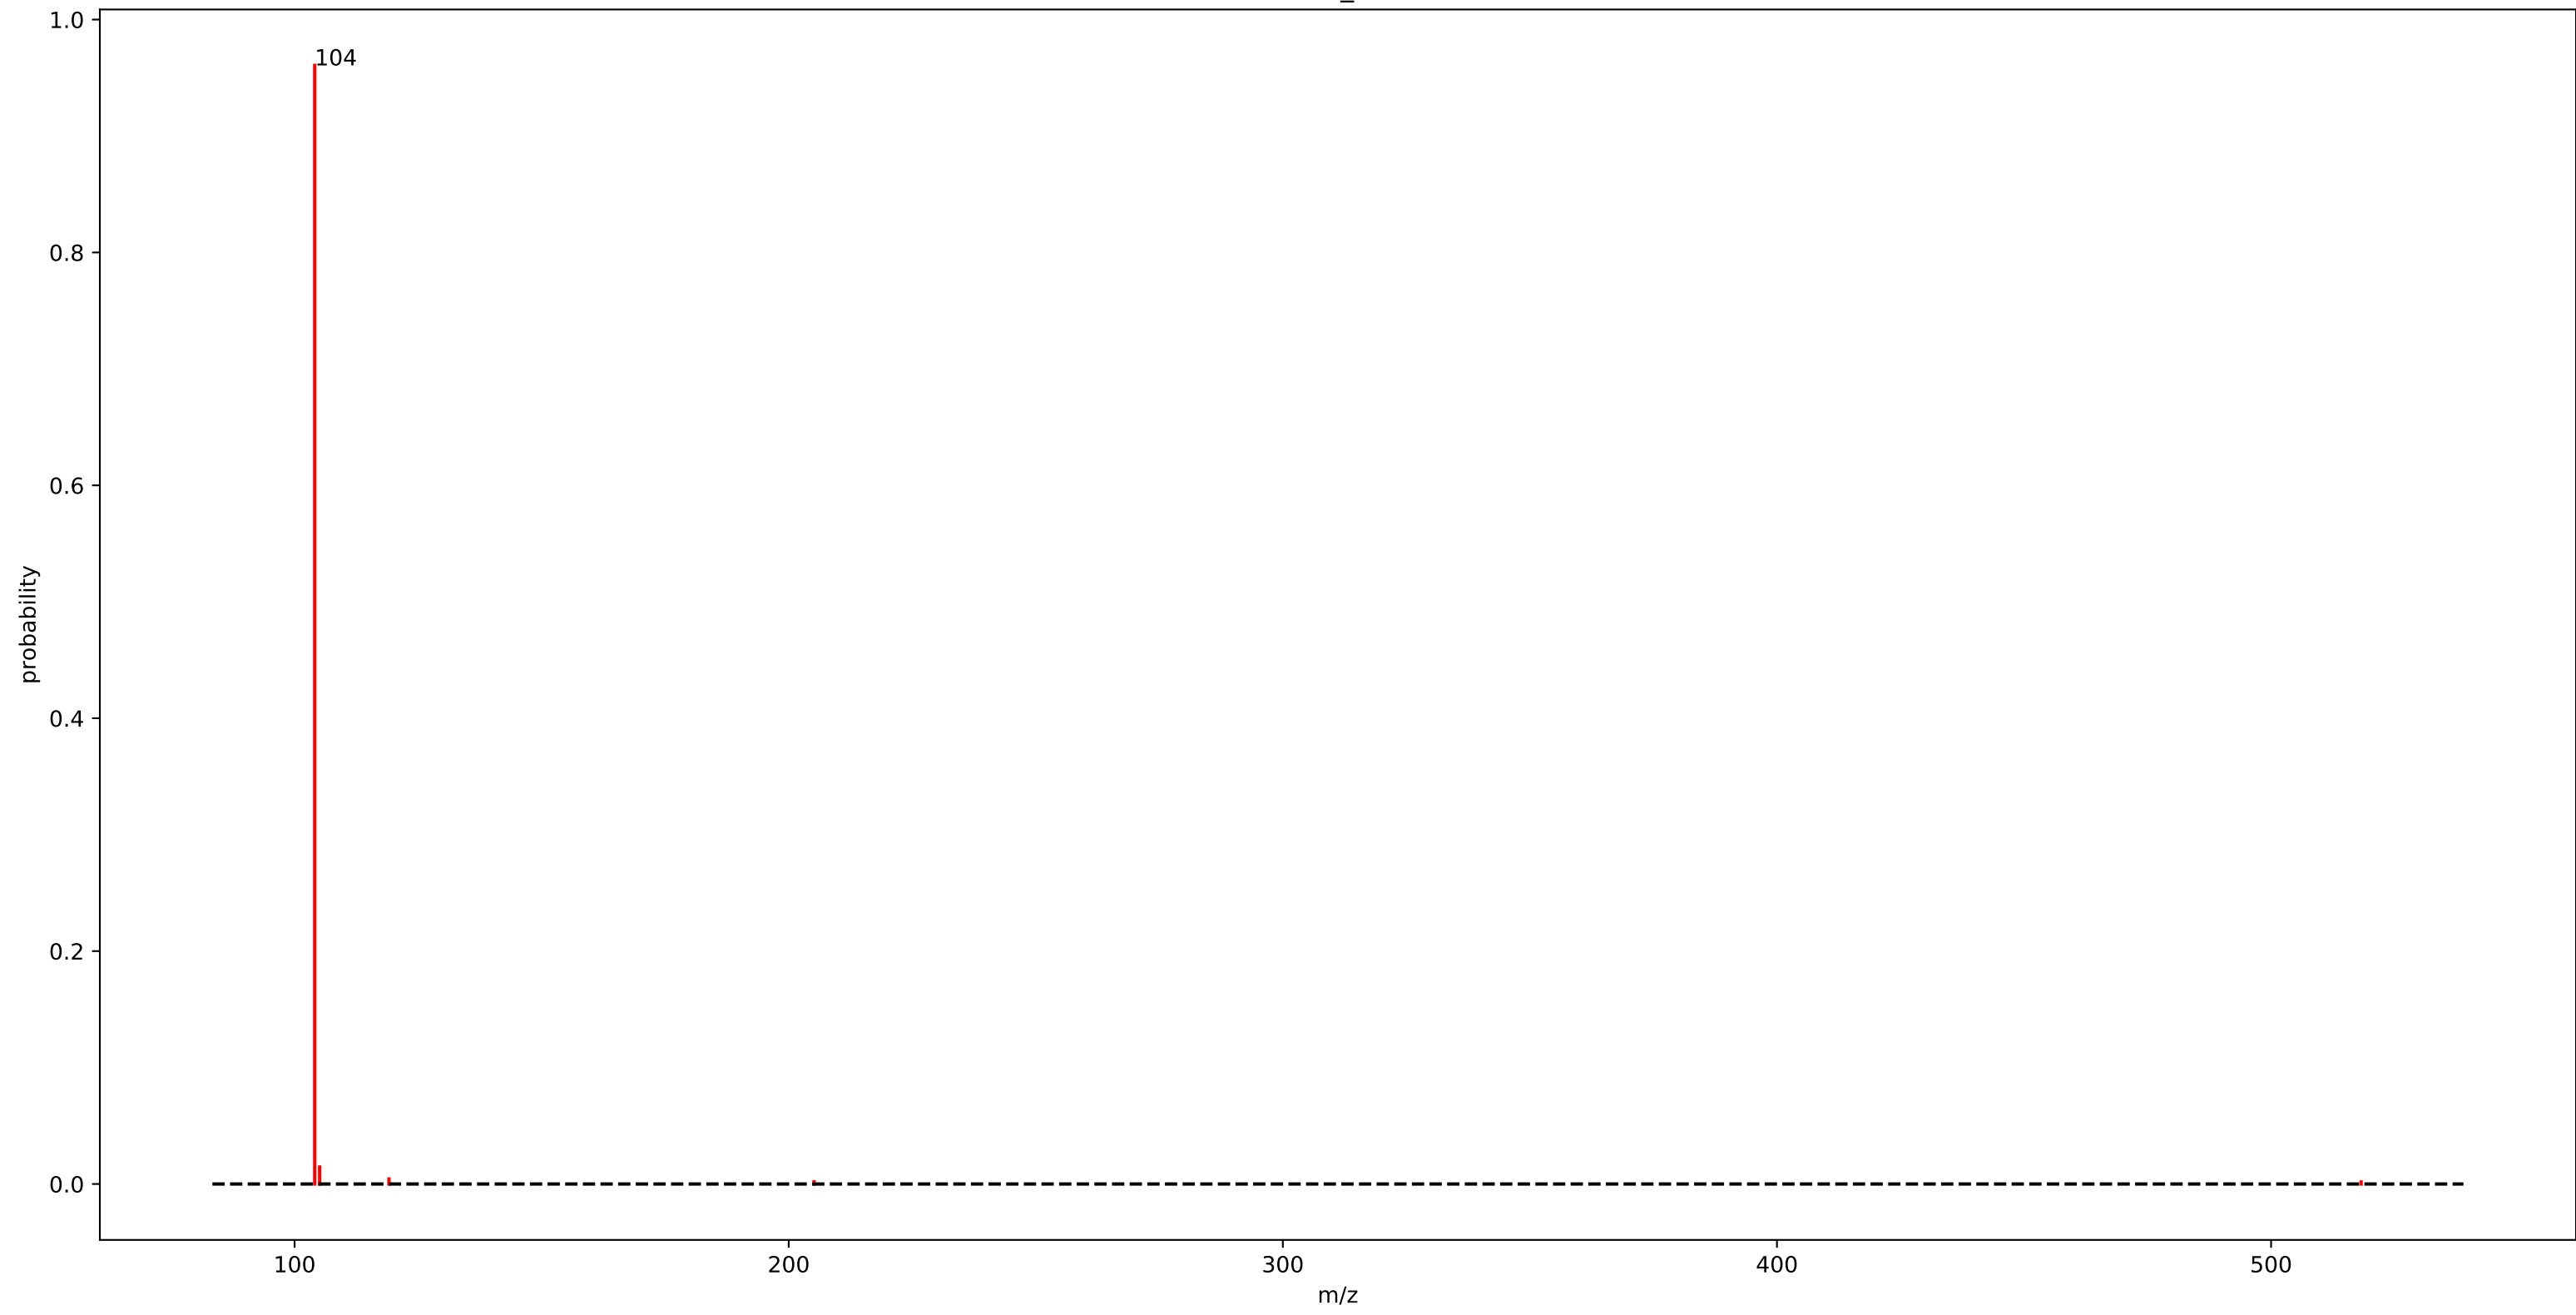

## motif\_429

fragment\_104.0725 : 0.96  
fragment\_105.0725 : 0.01

motif\_428



motif\_428

motif\_427

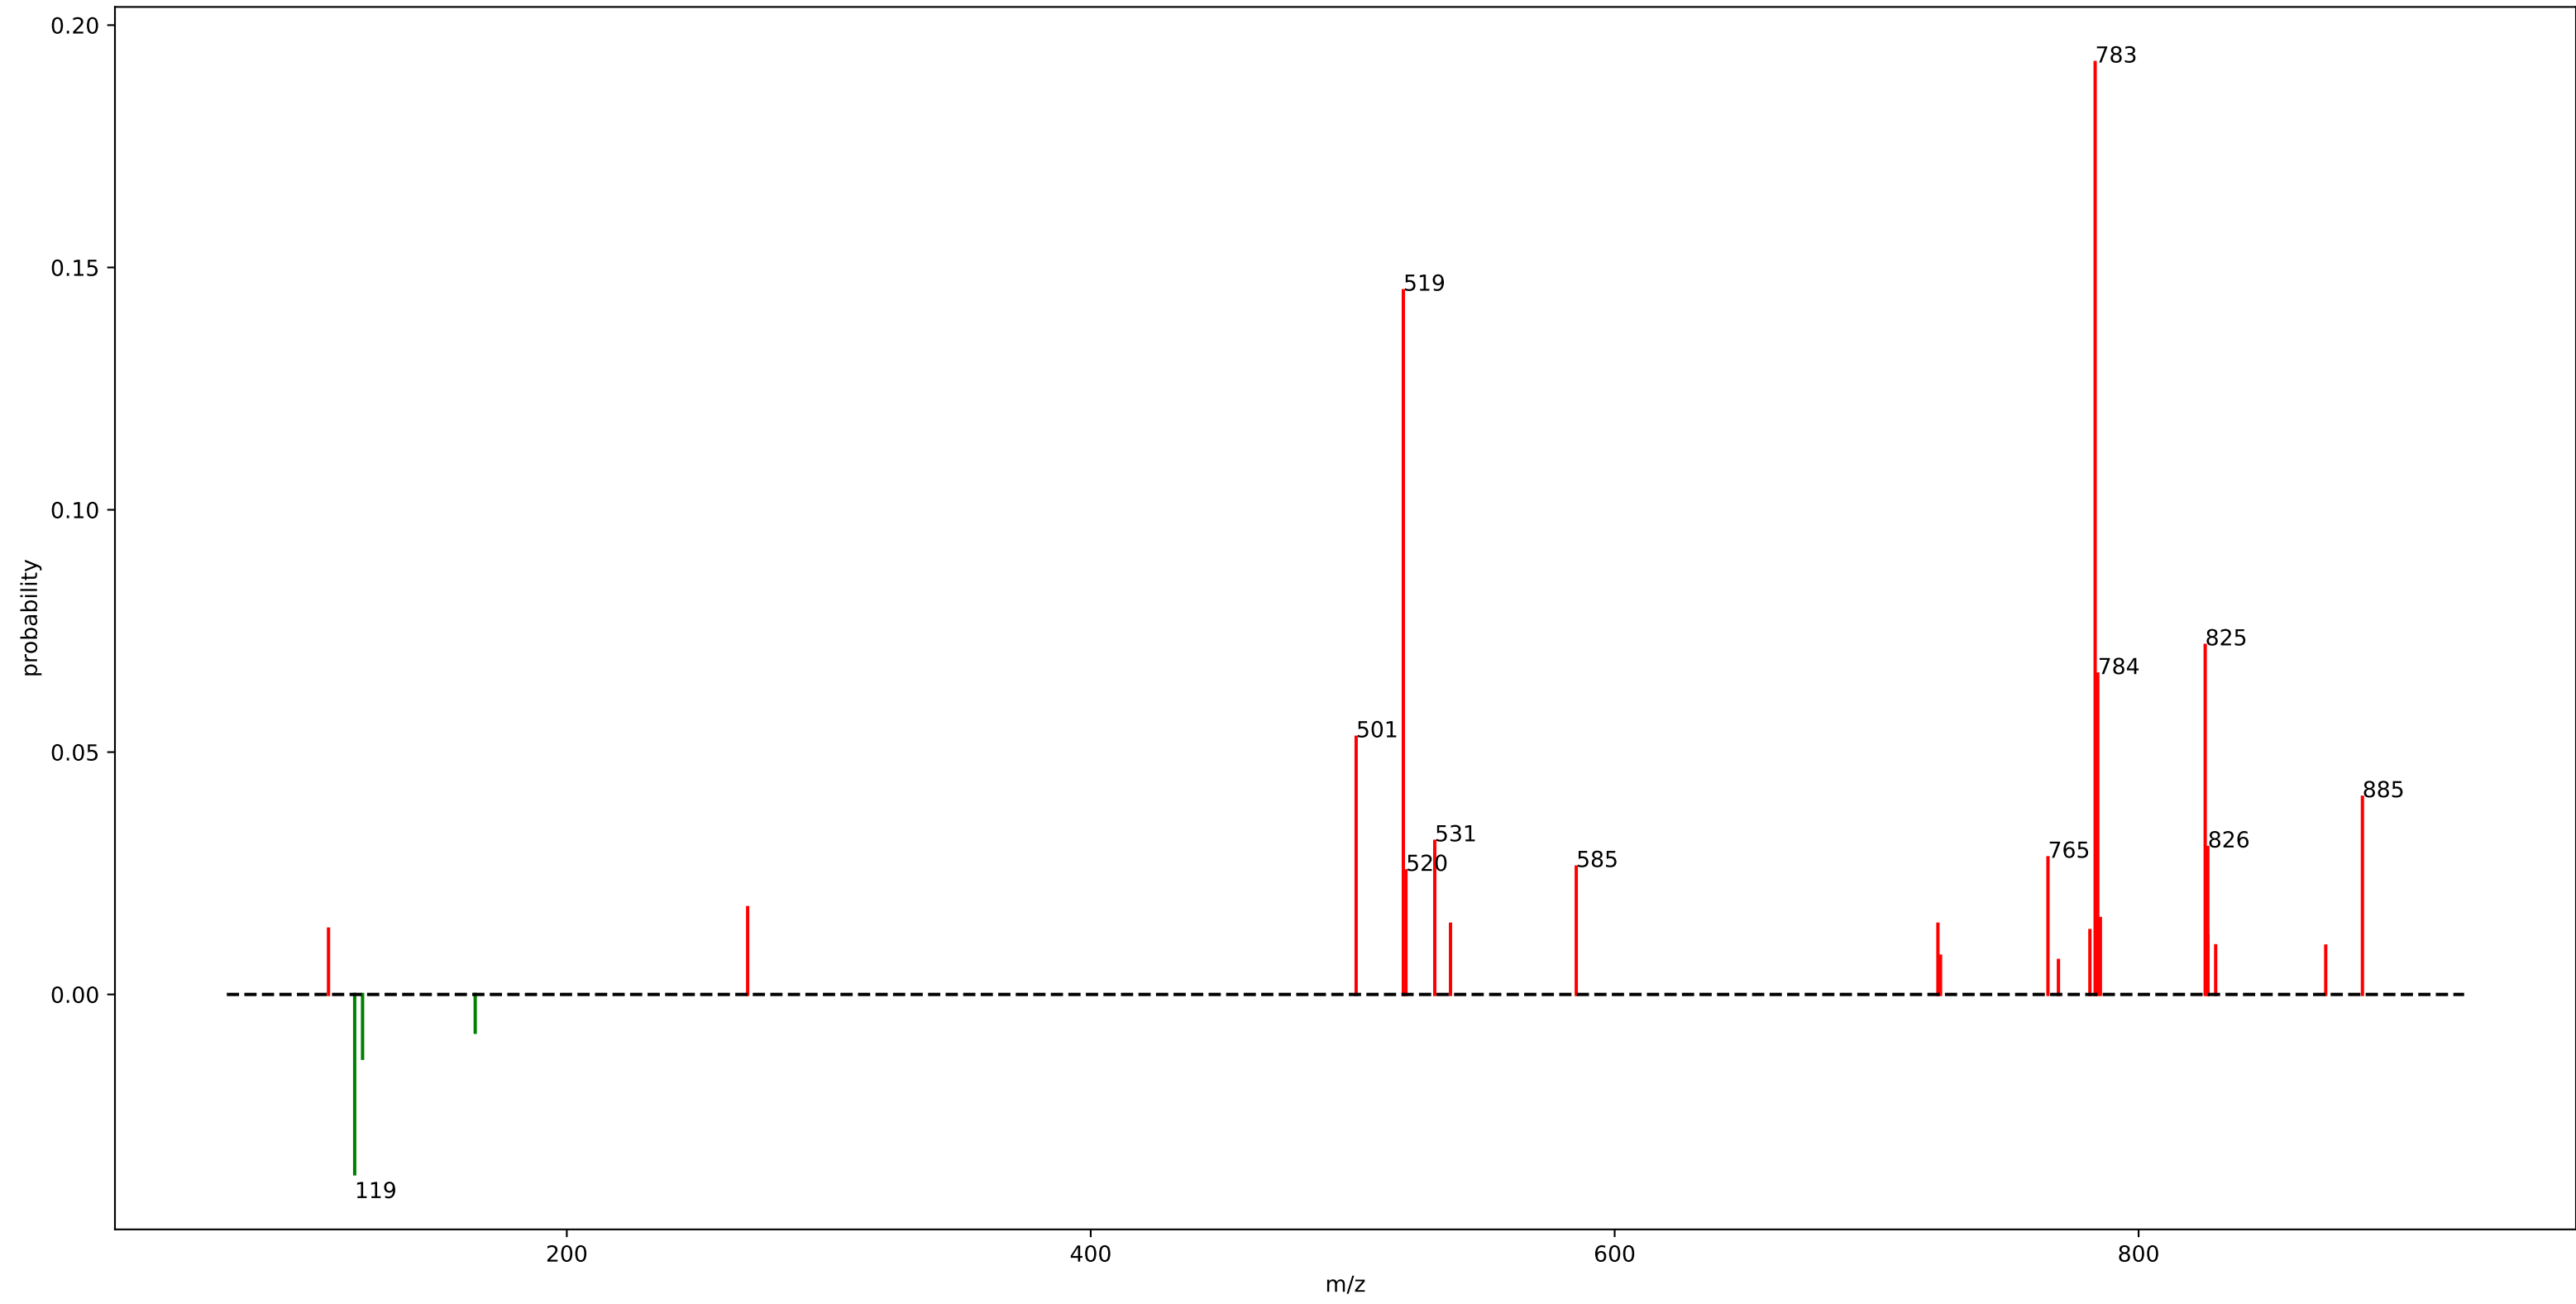

## motif\_427

|                   |        |                   |        |
|-------------------|--------|-------------------|--------|
| fragment_783.4175 | : 0.19 | fragment_829.4225 | : 0.01 |
| fragment_519.3325 | : 0.15 | fragment_871.4325 | : 0.01 |
| fragment_825.4275 | : 0.07 | fragment_724.3975 | : 0.01 |
| fragment_784.4175 | : 0.07 | loss_165.0425     | : 0.01 |
| fragment_501.3225 | : 0.05 | fragment_769.4025 | : 0.01 |
| fragment_885.4475 | : 0.04 |                   |        |
| loss_119.0375     | : 0.04 |                   |        |
| fragment_531.3325 | : 0.03 |                   |        |
| fragment_826.4275 | : 0.03 |                   |        |
| fragment_765.4075 | : 0.03 |                   |        |
| fragment_585.3425 | : 0.03 |                   |        |
| fragment_520.3325 | : 0.03 |                   |        |
| fragment_269.0475 | : 0.02 |                   |        |
| fragment_785.4175 | : 0.02 |                   |        |
| fragment_537.3425 | : 0.01 |                   |        |
| fragment_723.3975 | : 0.01 |                   |        |
| fragment_109.0425 | : 0.01 |                   |        |
| fragment_781.4125 | : 0.01 |                   |        |
| loss_122.0425     | : 0.01 |                   |        |
| fragment_826.4325 | : 0.01 |                   |        |

motif\_426

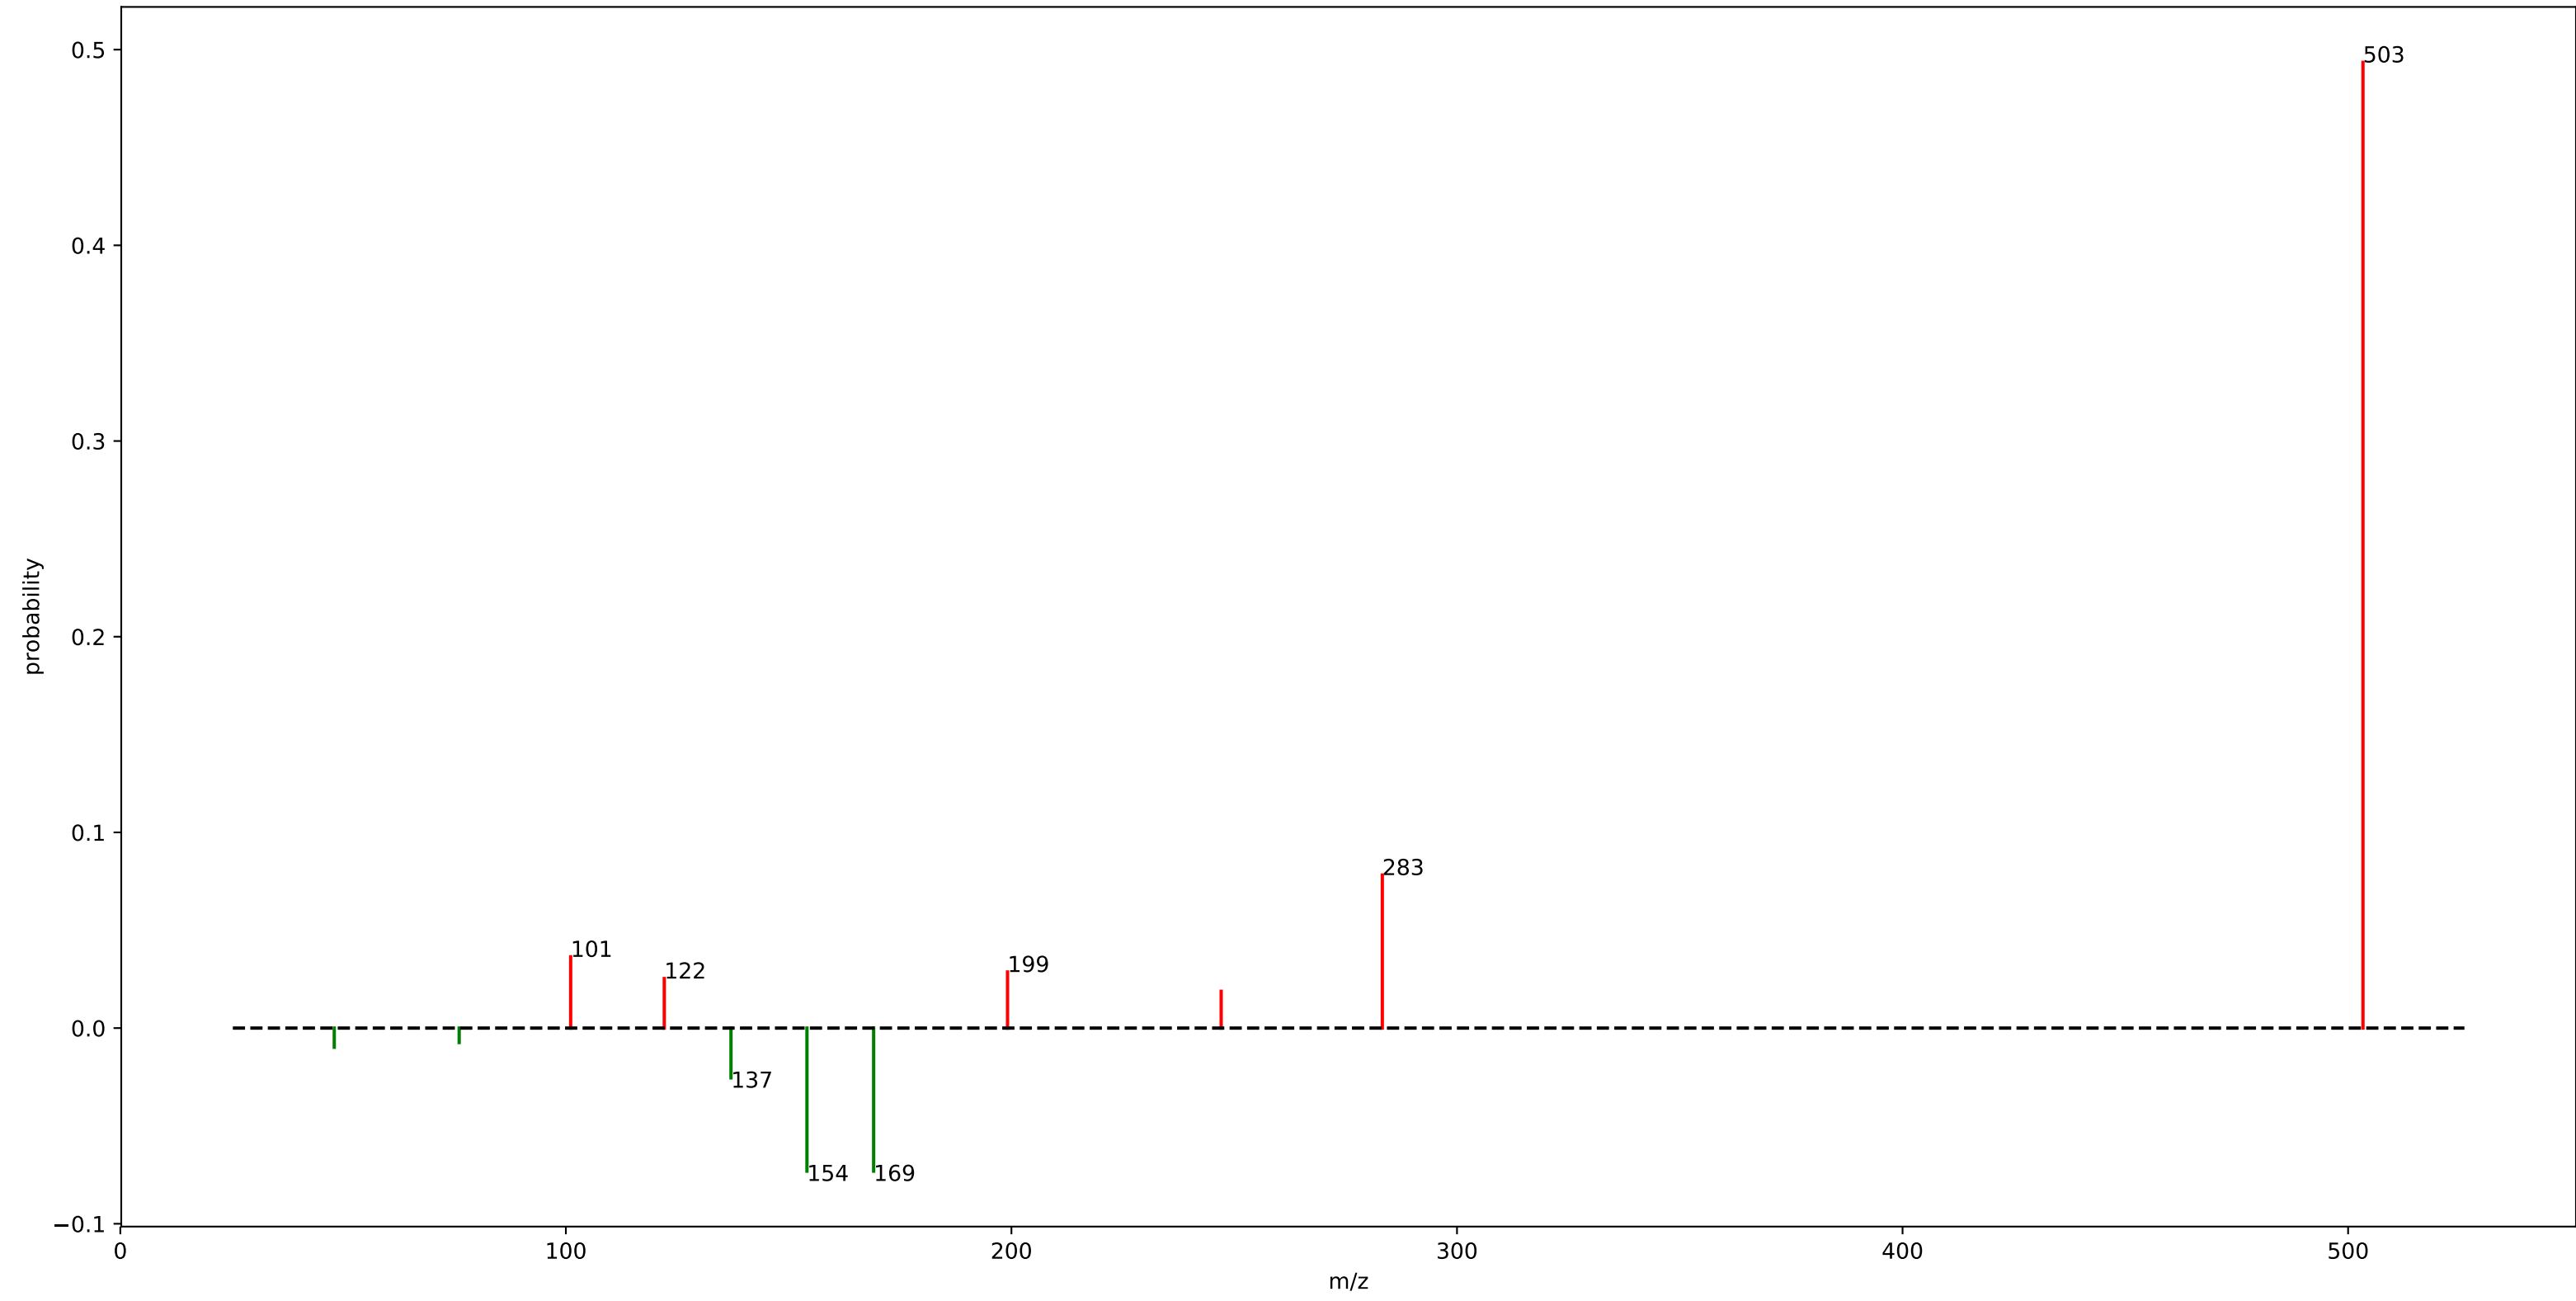

## motif\_426

|                   |        |
|-------------------|--------|
| fragment_503.3375 | : 0.49 |
| fragment_283.2375 | : 0.08 |
| loss_154.1075     | : 0.07 |
| loss_169.0725     | : 0.07 |
| fragment_101.0725 | : 0.04 |
| fragment_199.1225 | : 0.03 |
| loss_137.0575     | : 0.03 |
| fragment_122.0825 | : 0.03 |
| fragment_247.0775 | : 0.02 |
| loss_48.0175      | : 0.01 |
| loss_76.0525      | : 0.01 |



motif\_425

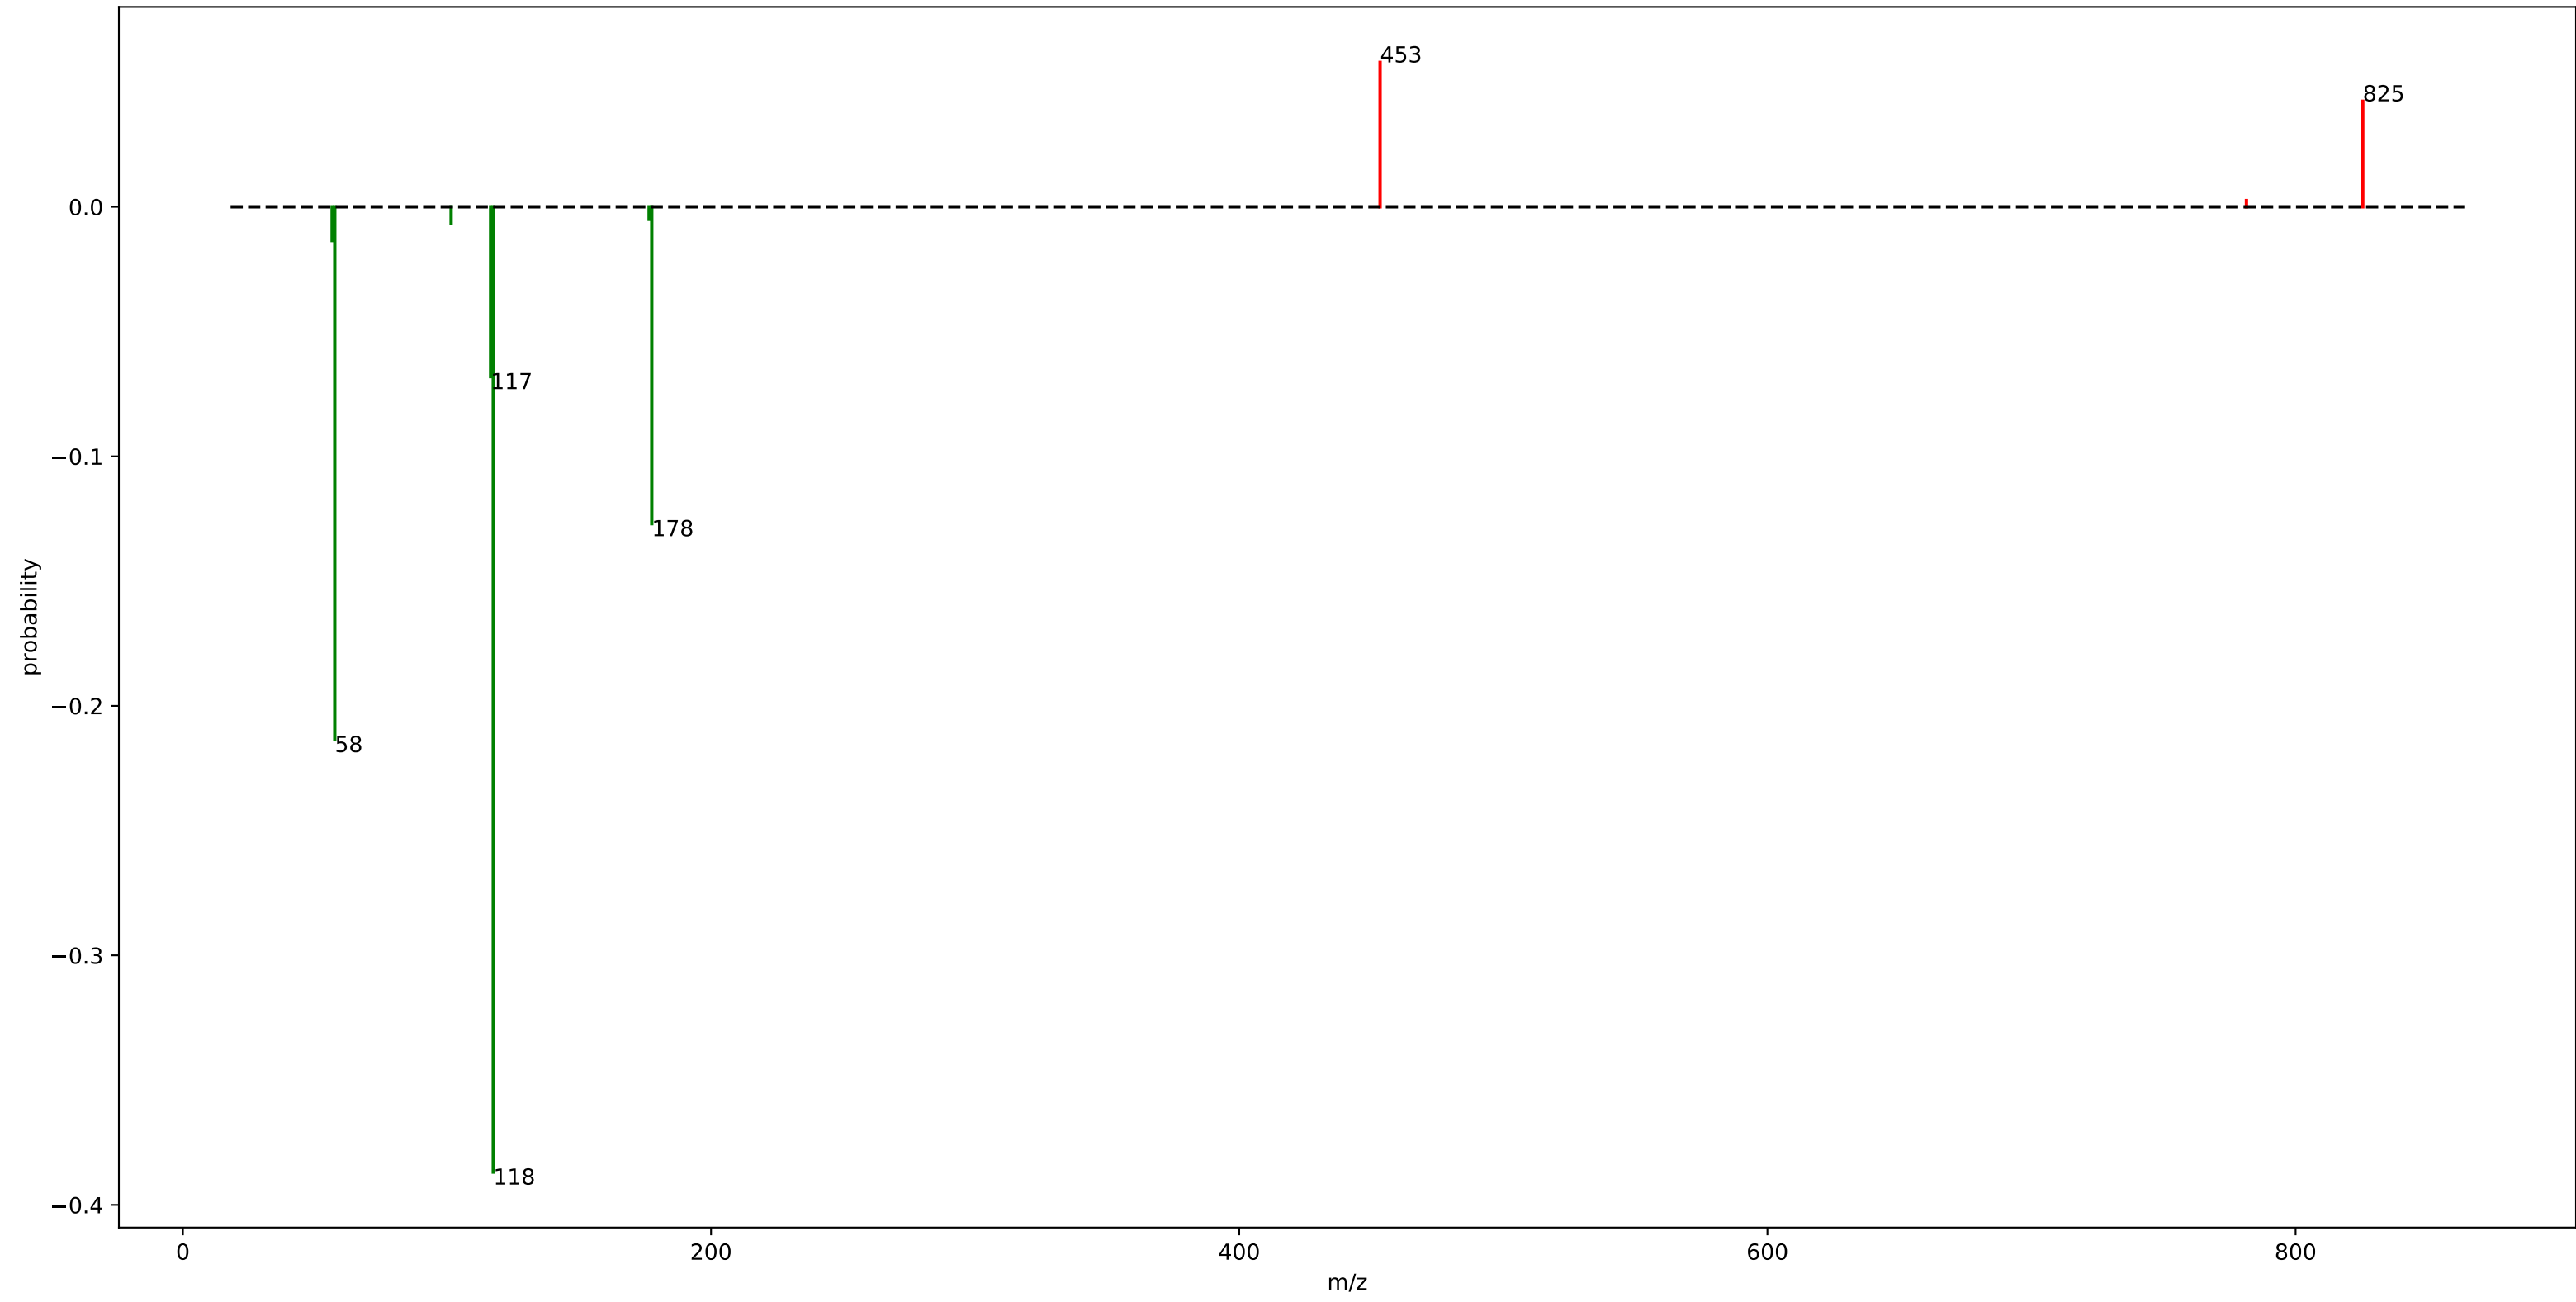

## motif\_425

|                   |        |
|-------------------|--------|
| loss_117.5325     | : 0.39 |
| loss_57.5125      | : 0.21 |
| loss_177.5525     | : 0.13 |
| loss_116.5275     | : 0.07 |
| fragment_453.3375 | : 0.06 |
| fragment_825.4375 | : 0.04 |
| loss_56.5075      | : 0.01 |
| loss_101.5675     | : 0.01 |
| loss_176.5475     | : 0.01 |

motif\_424

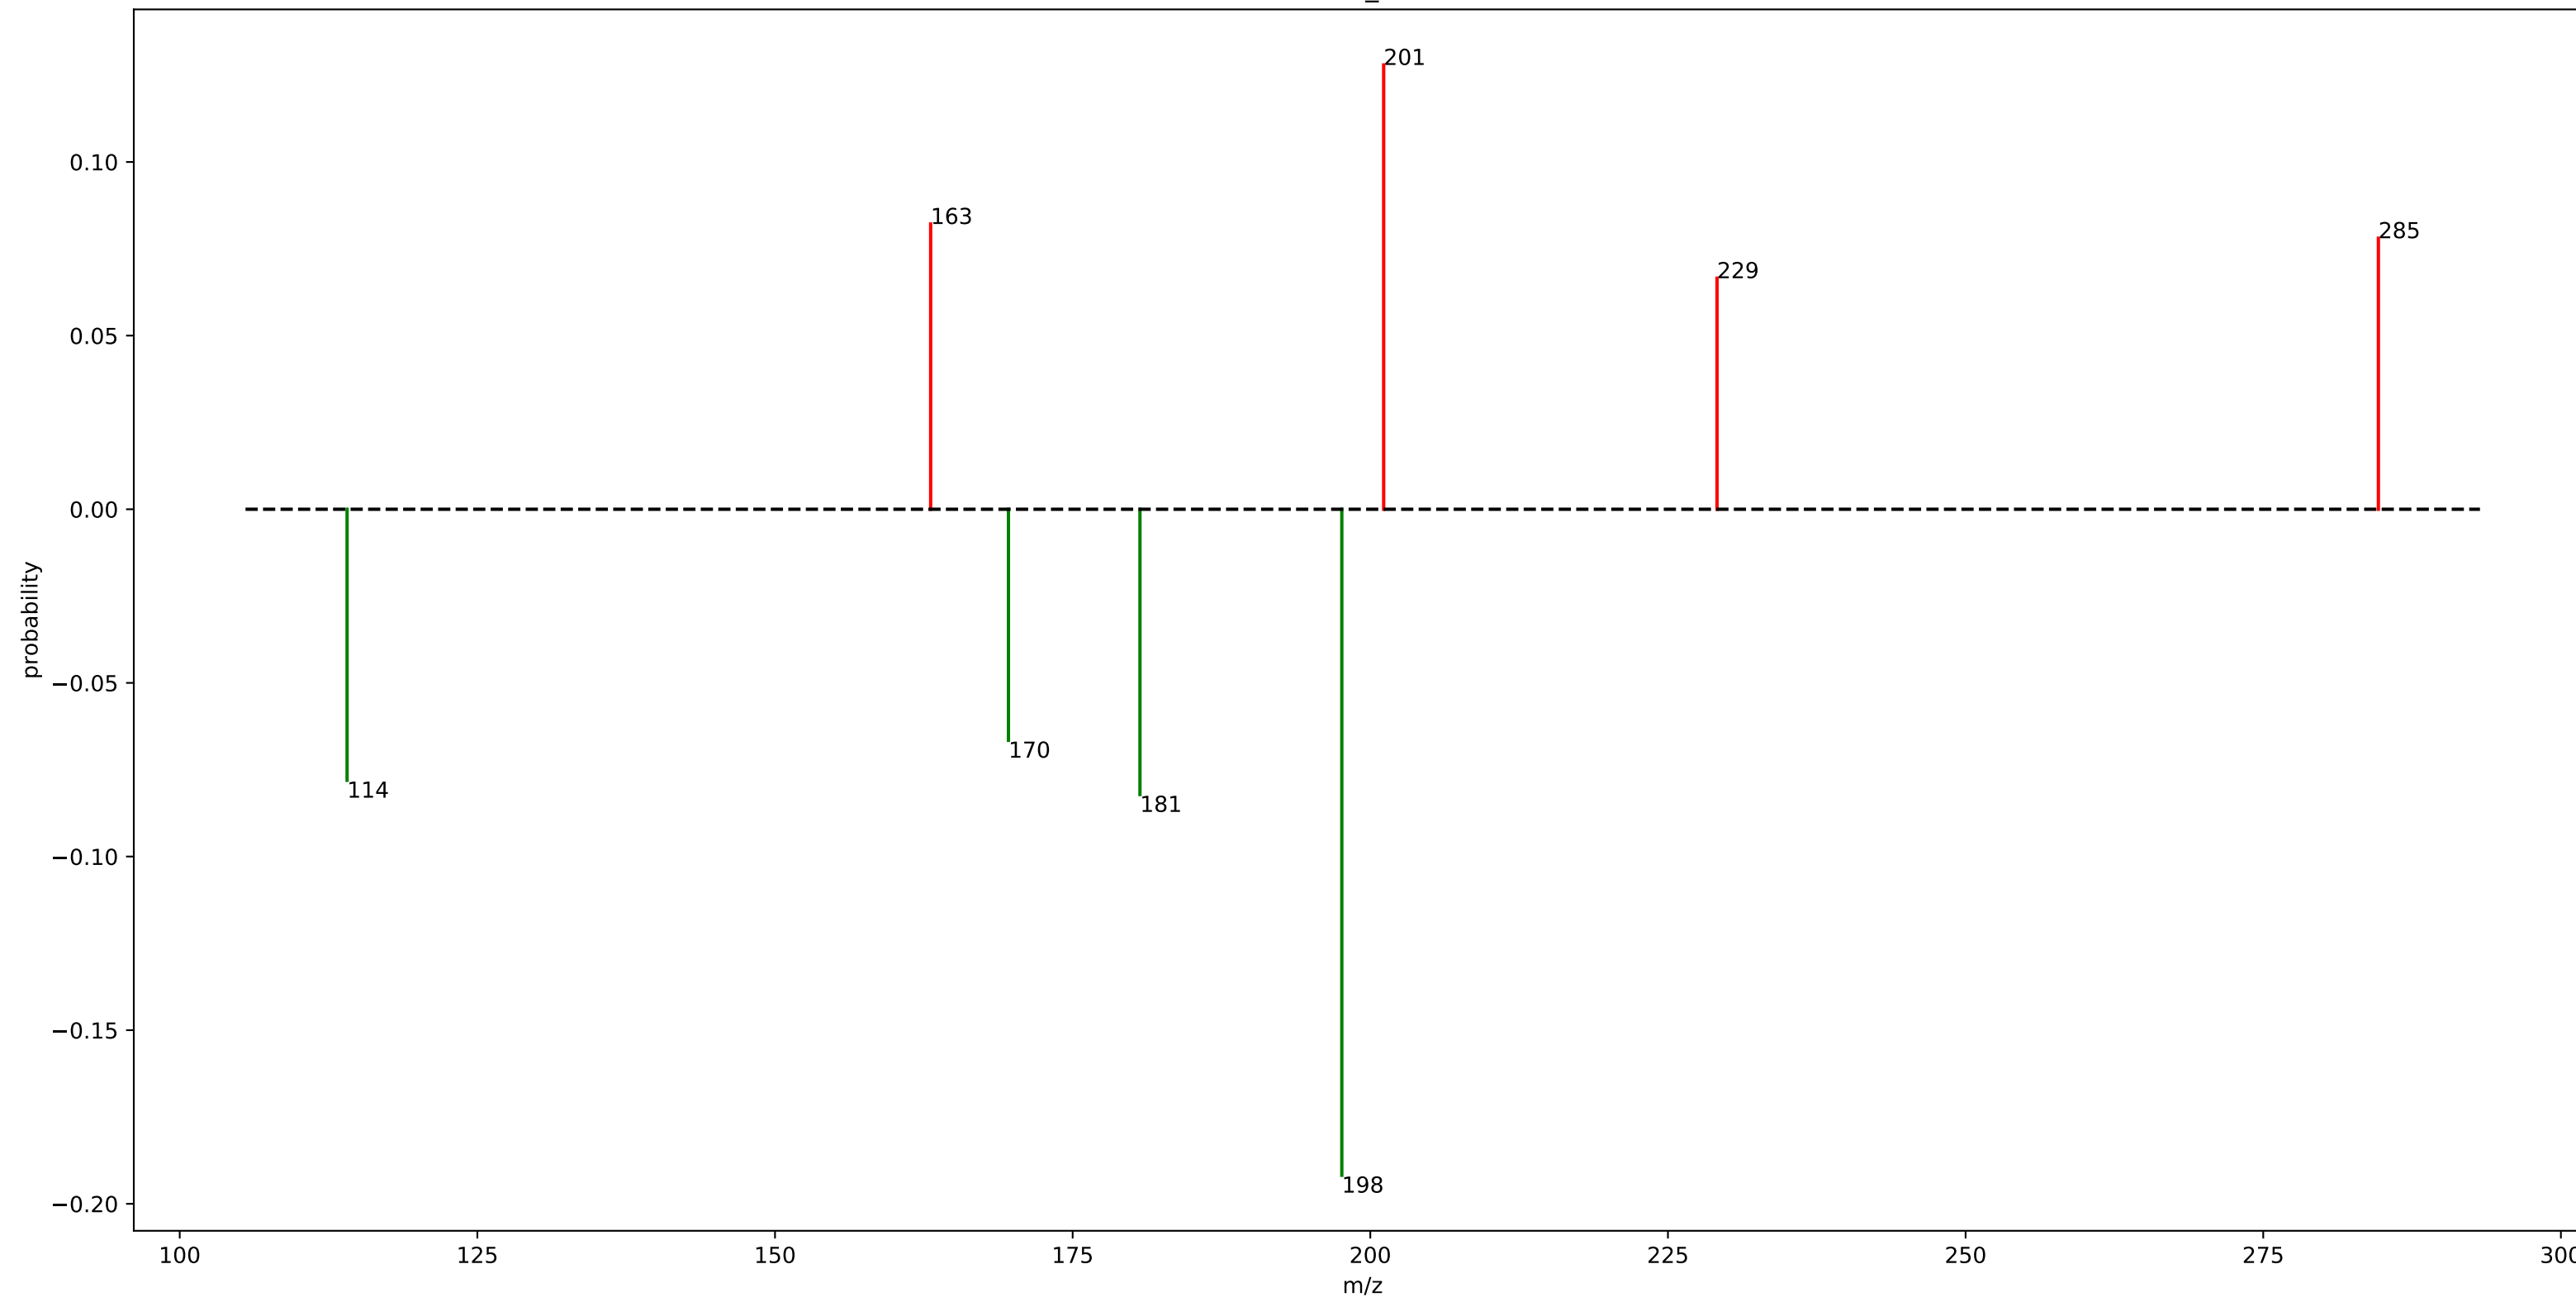

## motif\_424

|                   |        |
|-------------------|--------|
| loss_197.6075     | : 0.19 |
| fragment_201.1225 | : 0.13 |
| fragment_163.0725 | : 0.08 |
| loss_180.6525     | : 0.08 |
| fragment_284.6725 | : 0.08 |
| loss_114.0575     | : 0.08 |
| fragment_229.1225 | : 0.07 |
| loss_169.6075     | : 0.07 |

motif\_423

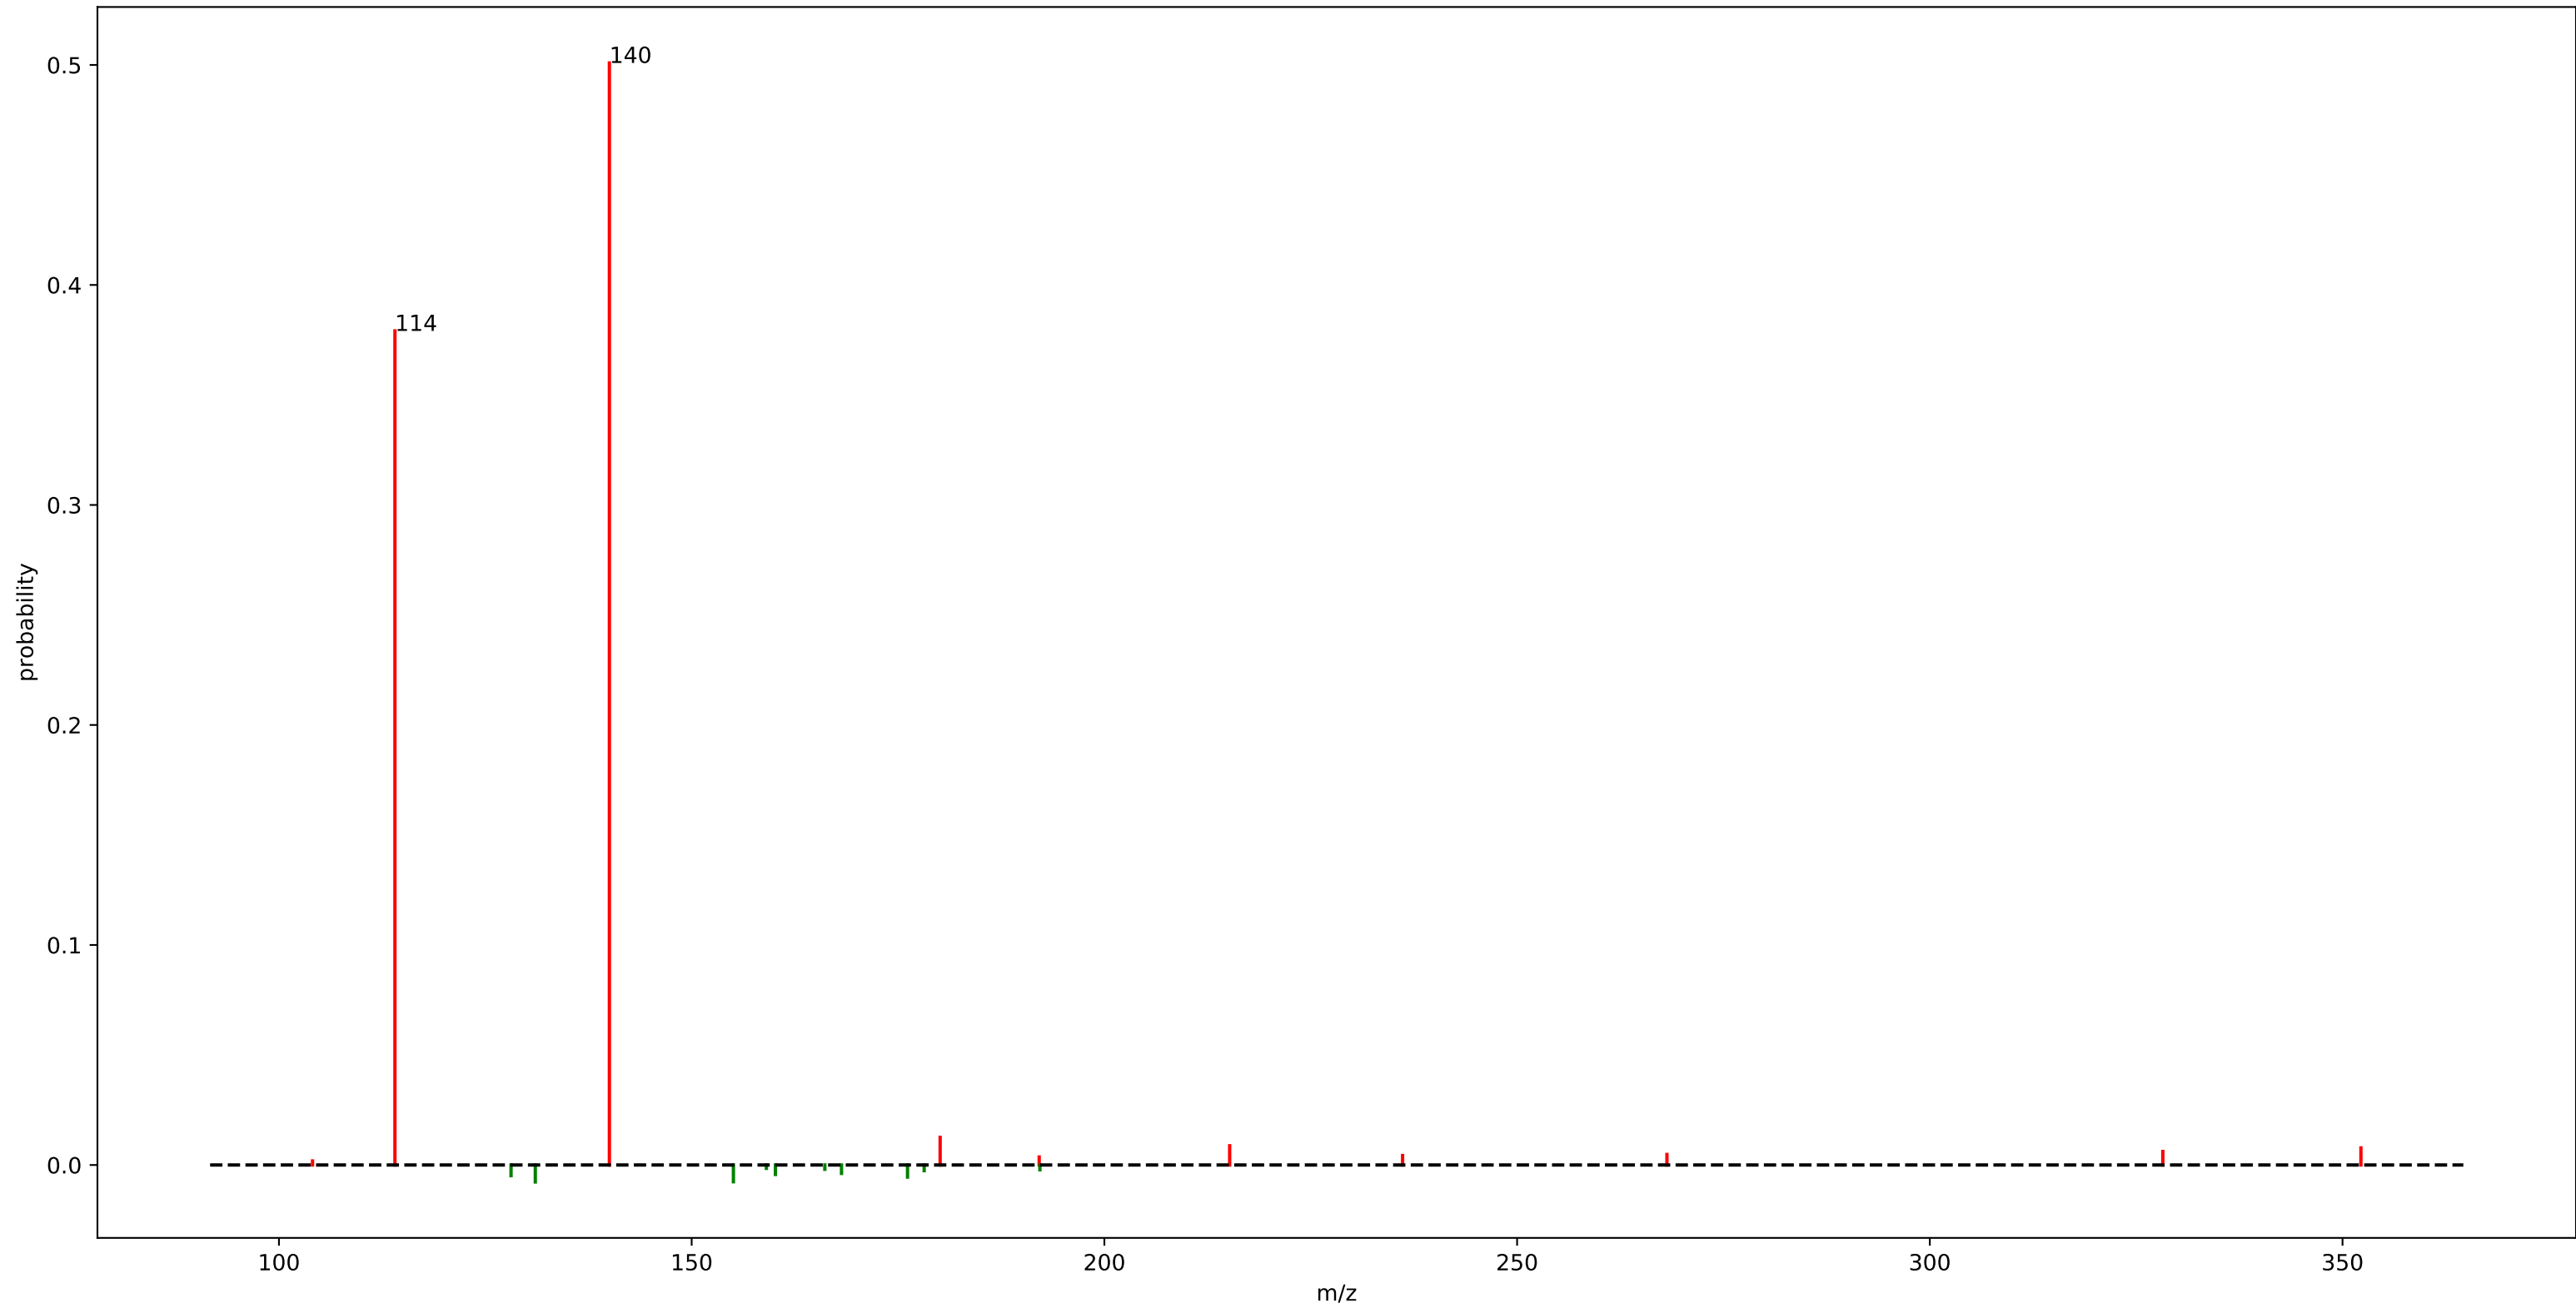

## motif\_423

|                   |        |
|-------------------|--------|
| fragment_140.0325 | : 0.50 |
| fragment_114.0525 | : 0.38 |
| fragment_180.1025 | : 0.01 |
| fragment_215.1775 | : 0.01 |
| fragment_352.2275 | : 0.01 |
| loss_131.0575     | : 0.01 |
| loss_155.0575     | : 0.01 |
| fragment_328.2275 | : 0.01 |
| loss_176.1525     | : 0.01 |

rhamn\_motif\_33.m2m

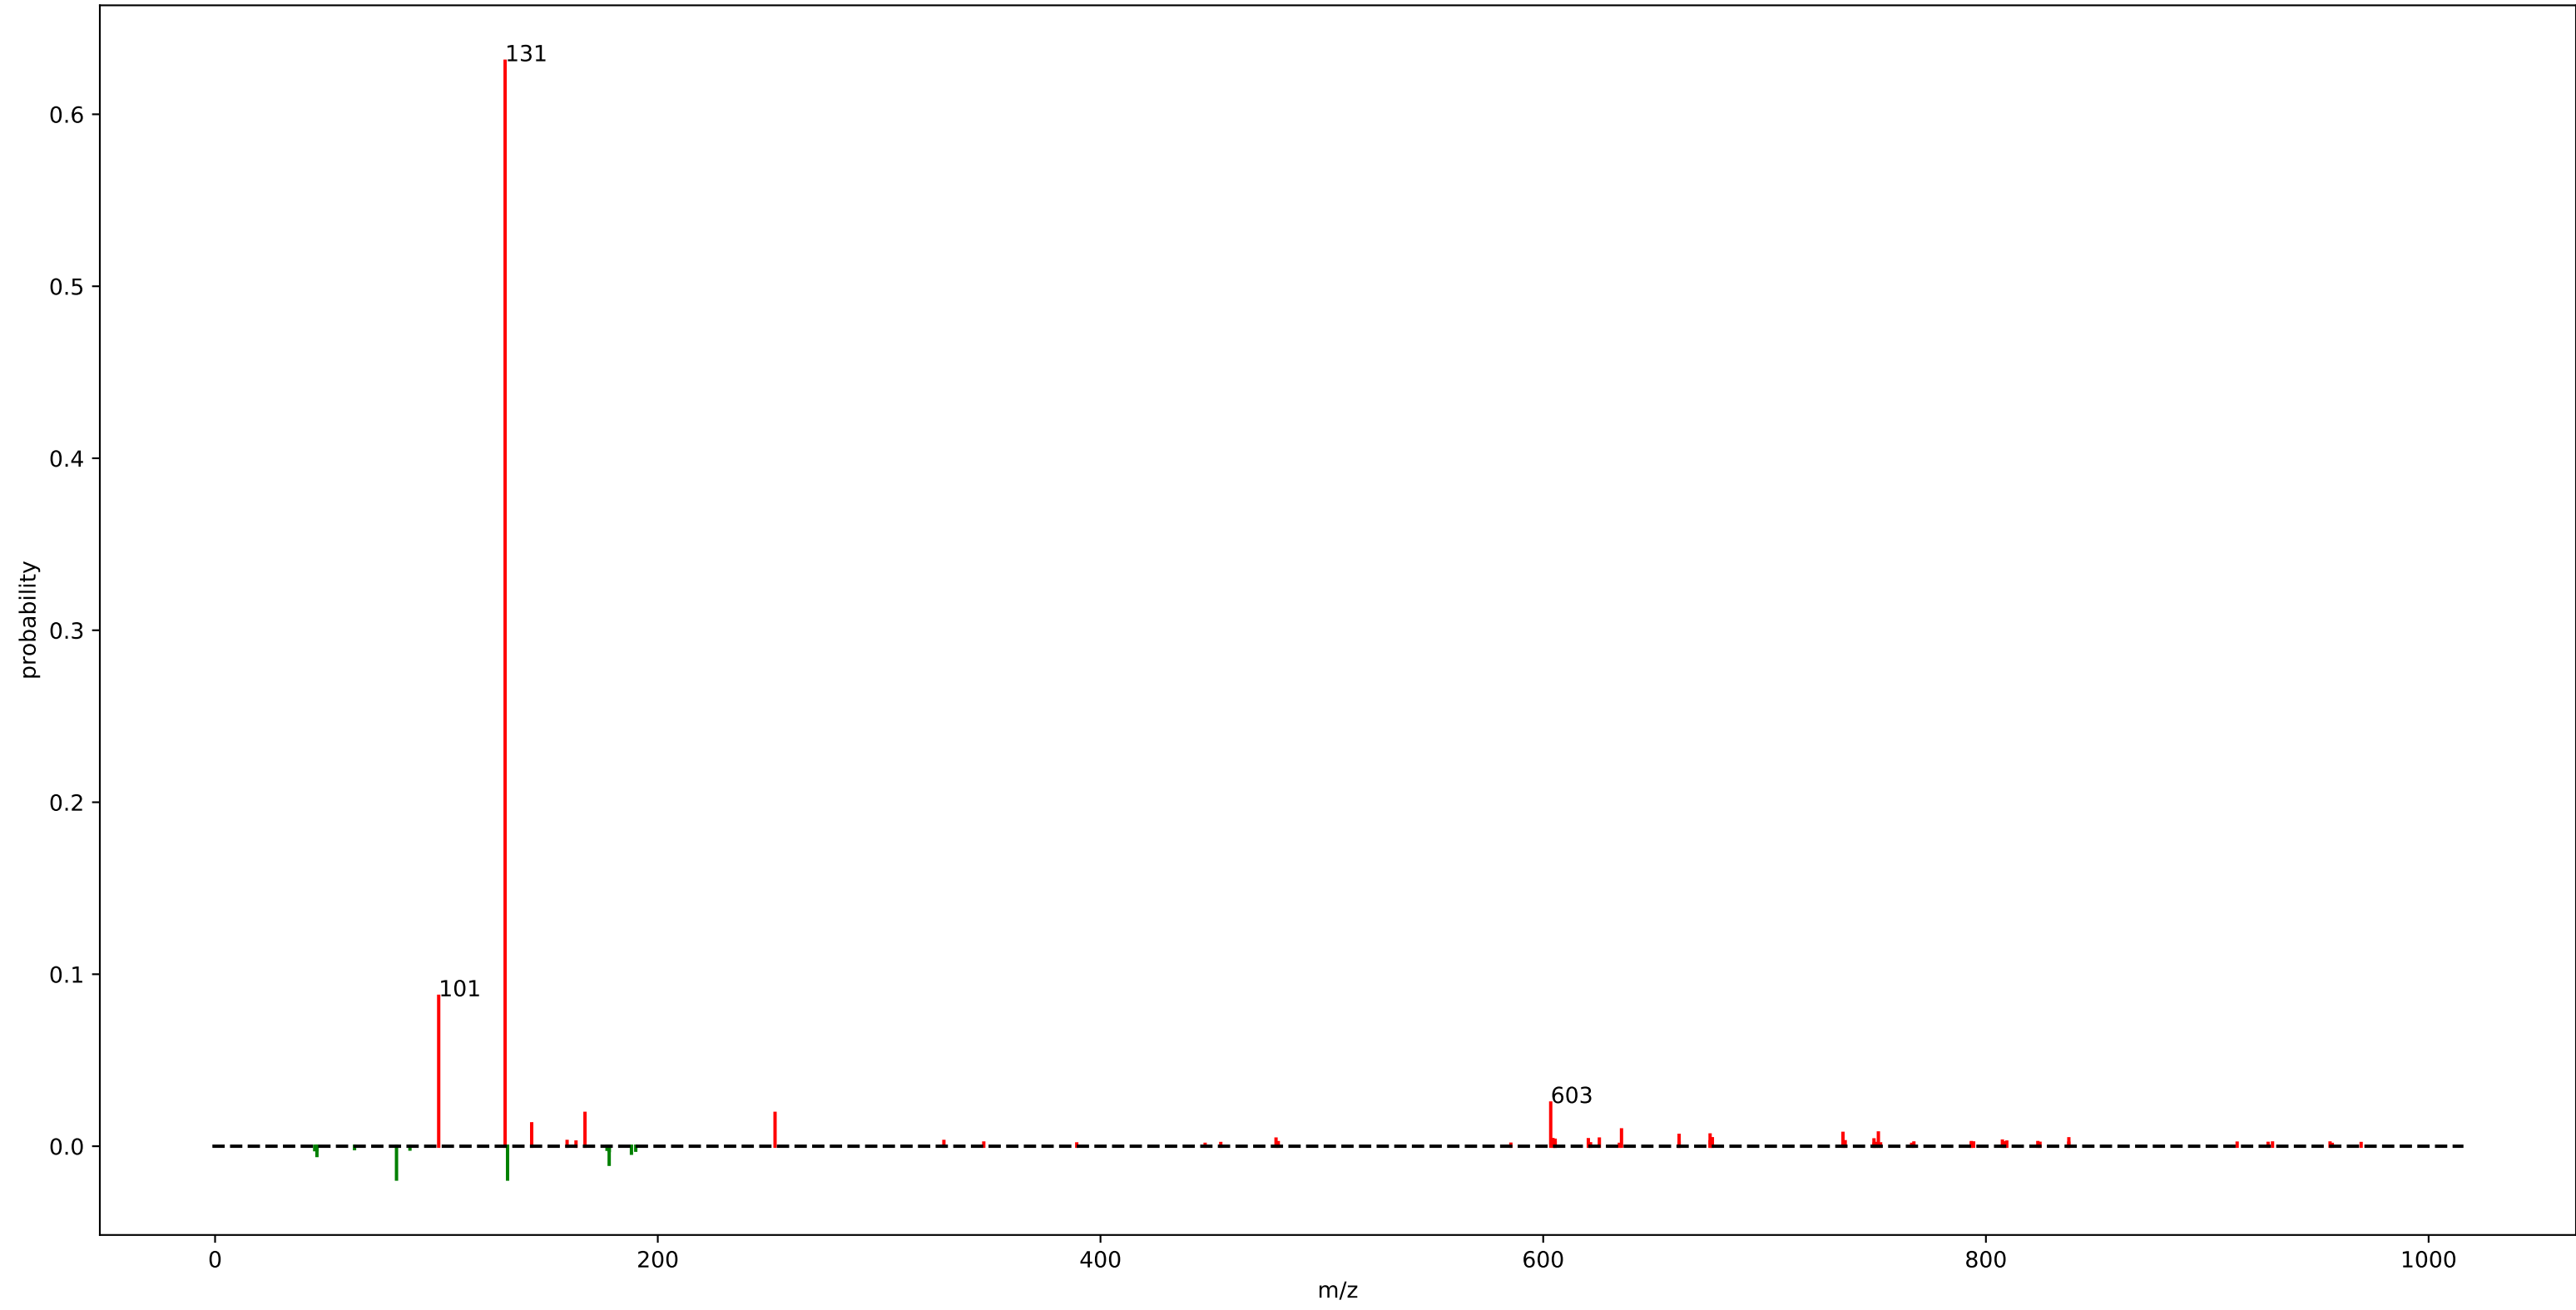

## rhamn\_motif\_33.m2m

|                   |        |
|-------------------|--------|
| fragment_131.0325 | : 0.63 |
| fragment_101.0225 | : 0.09 |
| fragment_603.3925 | : 0.03 |
| loss_132.1375     | : 0.02 |
| fragment_167.1125 | : 0.02 |
| loss_81.9675      | : 0.02 |
| fragment_252.9725 | : 0.02 |
| fragment_143.0325 | : 0.01 |
| loss_178.0425     | : 0.01 |
| fragment_635.3725 | : 0.01 |
| fragment_751.4225 | : 0.01 |
| fragment_735.4275 | : 0.01 |
| fragment_675.3975 | : 0.01 |
| fragment_661.3975 | : 0.01 |
| loss_46.0125      | : 0.01 |



motif\_421

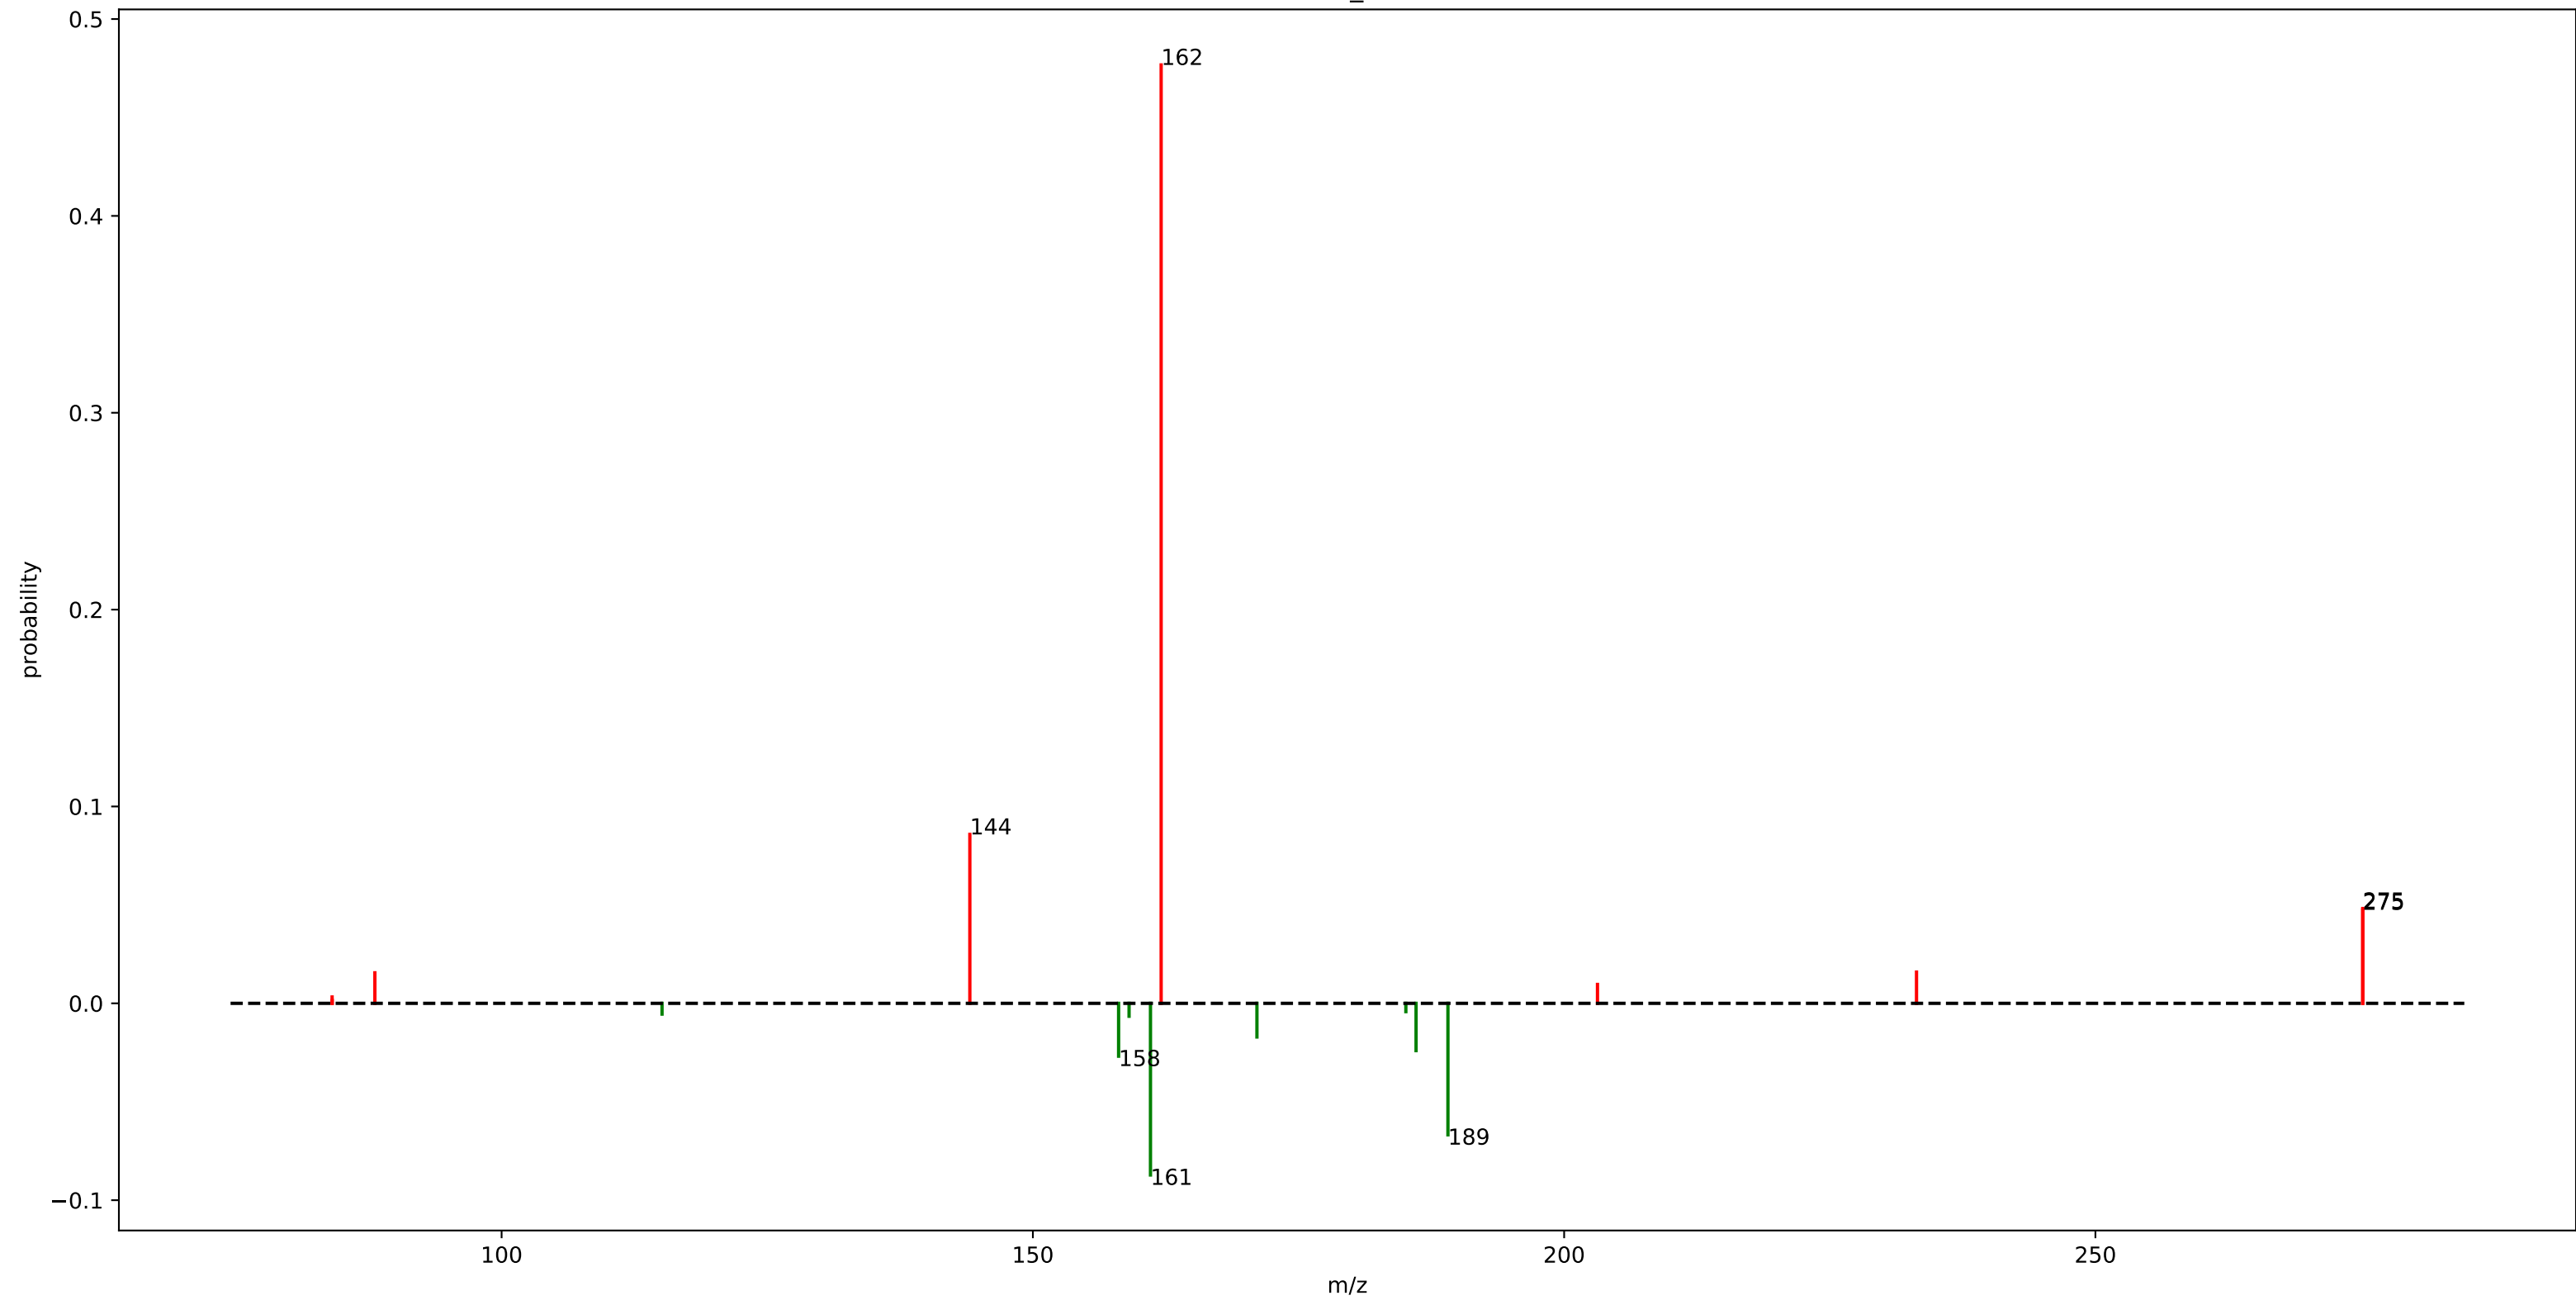

## motif\_421

|                   |        |
|-------------------|--------|
| fragment_162.0725 | : 0.48 |
| loss_161.0675     | : 0.09 |
| fragment_144.0675 | : 0.09 |
| loss_189.0625     | : 0.07 |
| fragment_275.1625 | : 0.05 |
| fragment_275.1575 | : 0.05 |
| loss_158.0675     | : 0.03 |
| loss_186.0625     | : 0.02 |
| loss_171.0875     | : 0.02 |
| fragment_233.1625 | : 0.02 |
| fragment_88.0725  | : 0.02 |
| fragment_203.1375 | : 0.01 |
| loss_159.0525     | : 0.01 |
| loss_115.0975     | : 0.01 |

rhabdus\_motif\_187.m2m

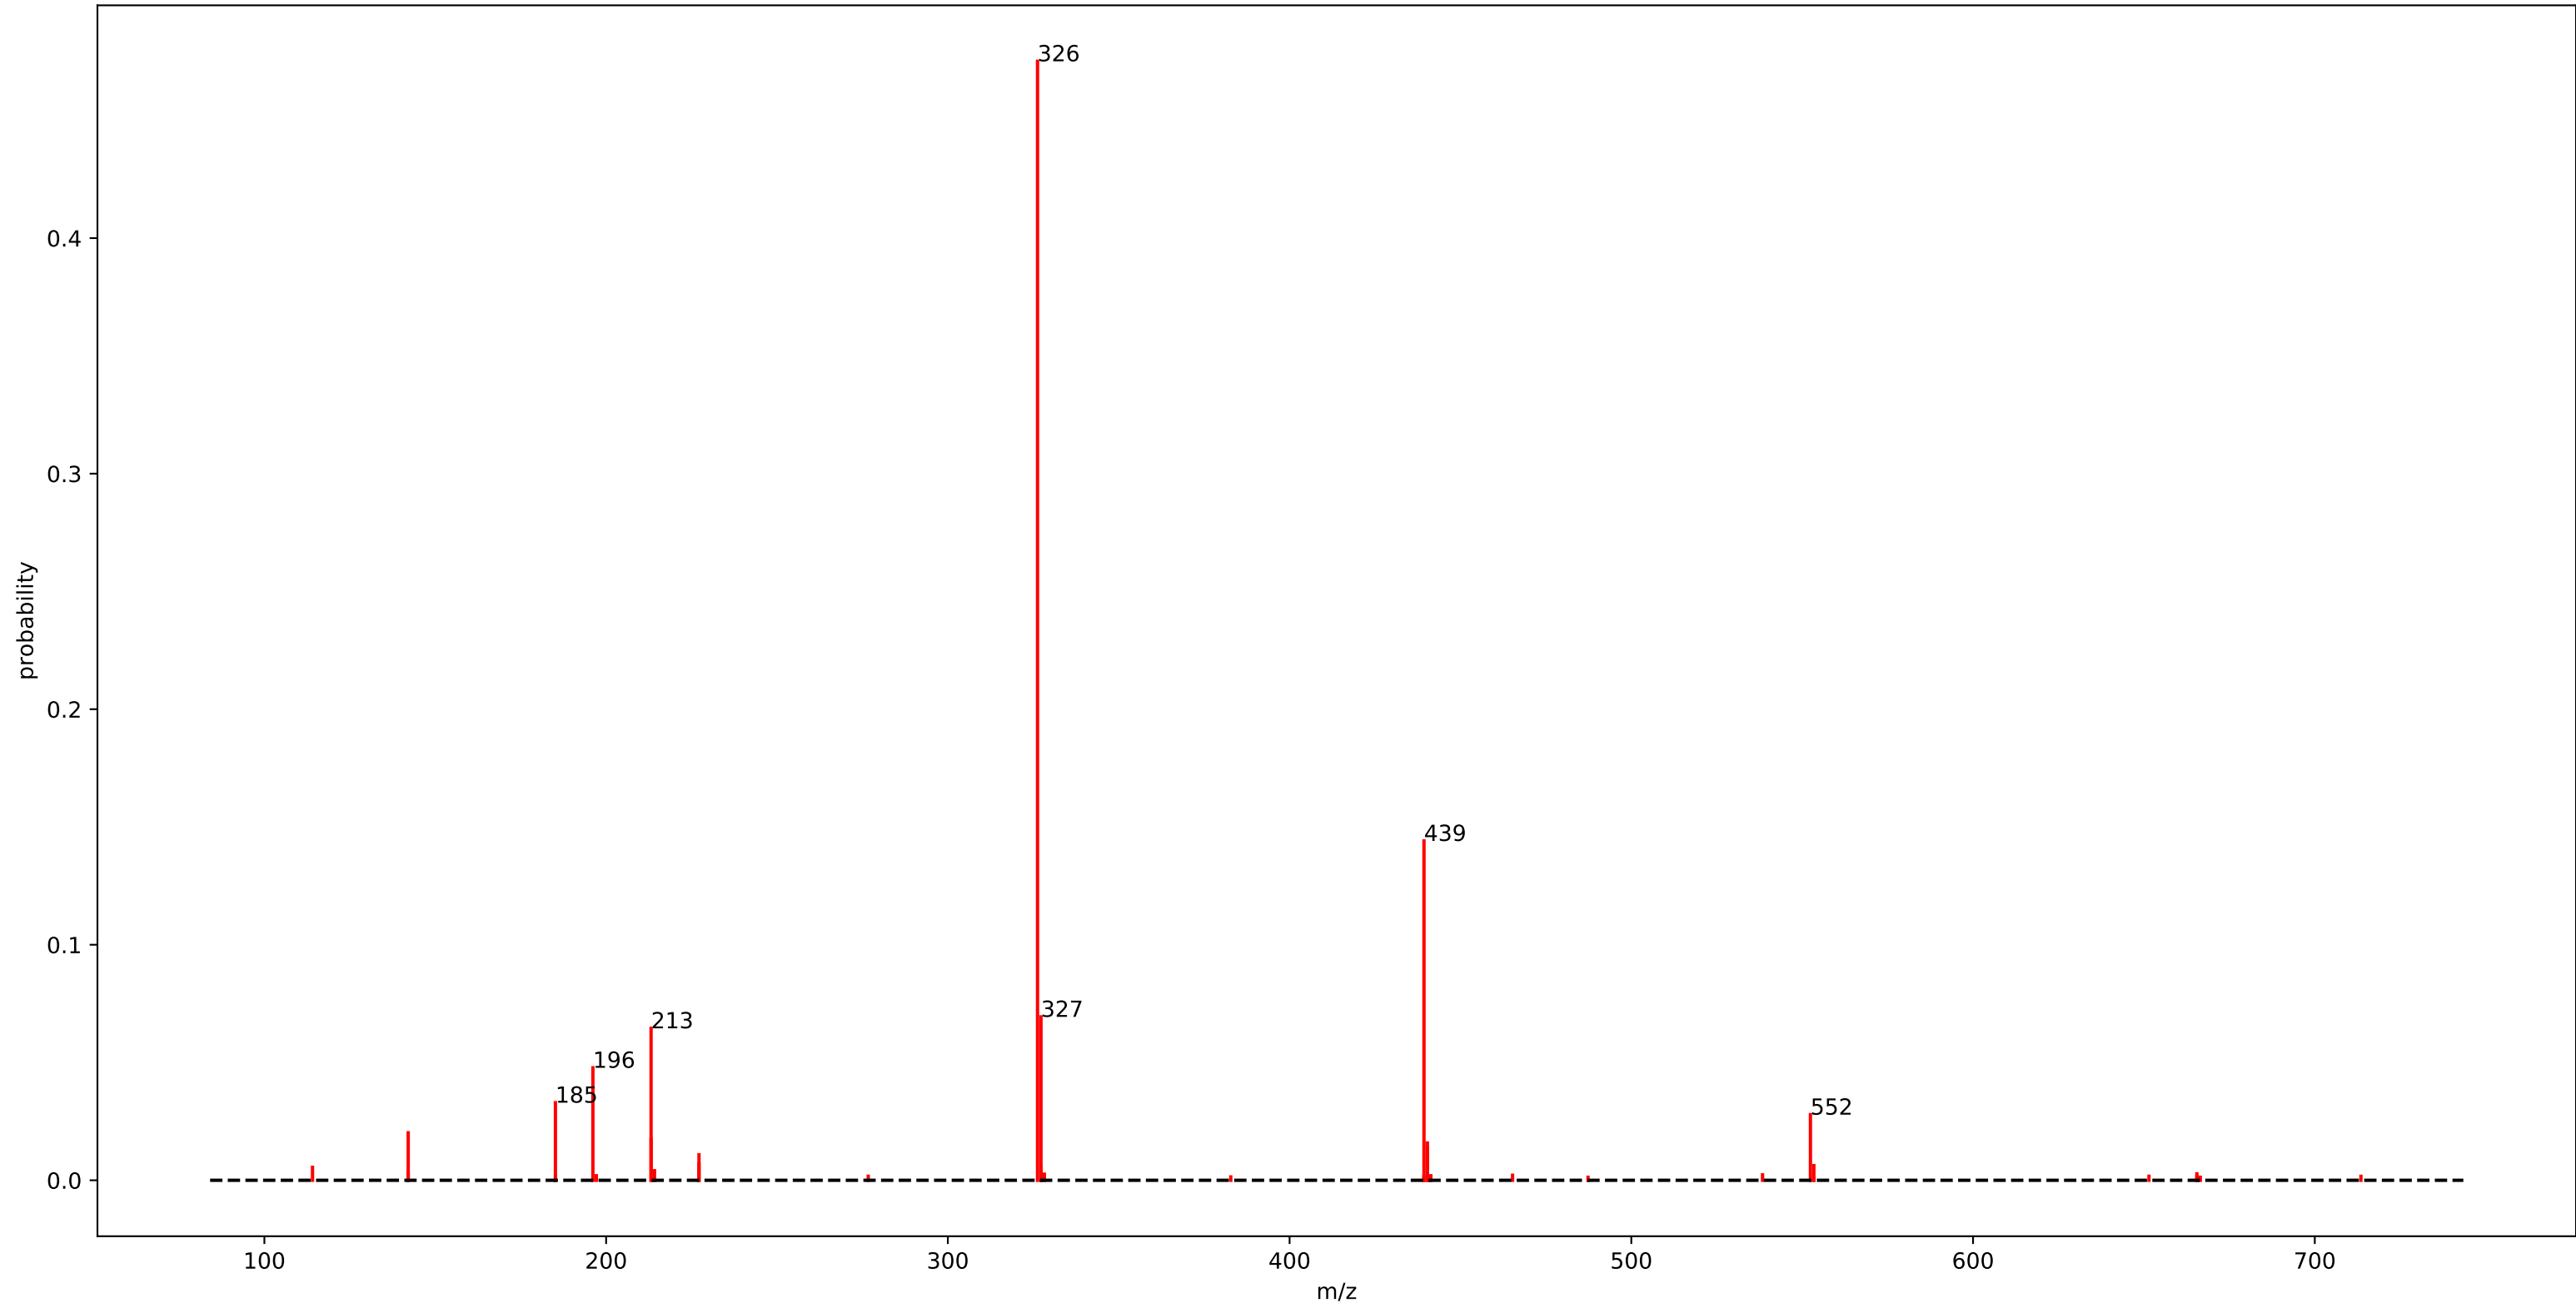

## rhabdus\_motif\_187.m2m

|                   |        |
|-------------------|--------|
| fragment_326.2425 | : 0.48 |
| fragment_439.3275 | : 0.14 |
| fragment_327.2475 | : 0.07 |
| fragment_213.1575 | : 0.06 |
| fragment_196.1325 | : 0.05 |
| fragment_185.1625 | : 0.03 |
| fragment_552.4125 | : 0.03 |
| fragment_142.0875 | : 0.02 |
| fragment_213.1625 | : 0.02 |
| fragment_440.3275 | : 0.02 |
| fragment_440.3325 | : 0.01 |
| fragment_227.1775 | : 0.01 |
| fragment_227.1725 | : 0.01 |
| fragment_553.4125 | : 0.01 |
| fragment_327.2425 | : 0.01 |
| fragment_114.0875 | : 0.01 |

urine\_mass2motif\_27.m2m

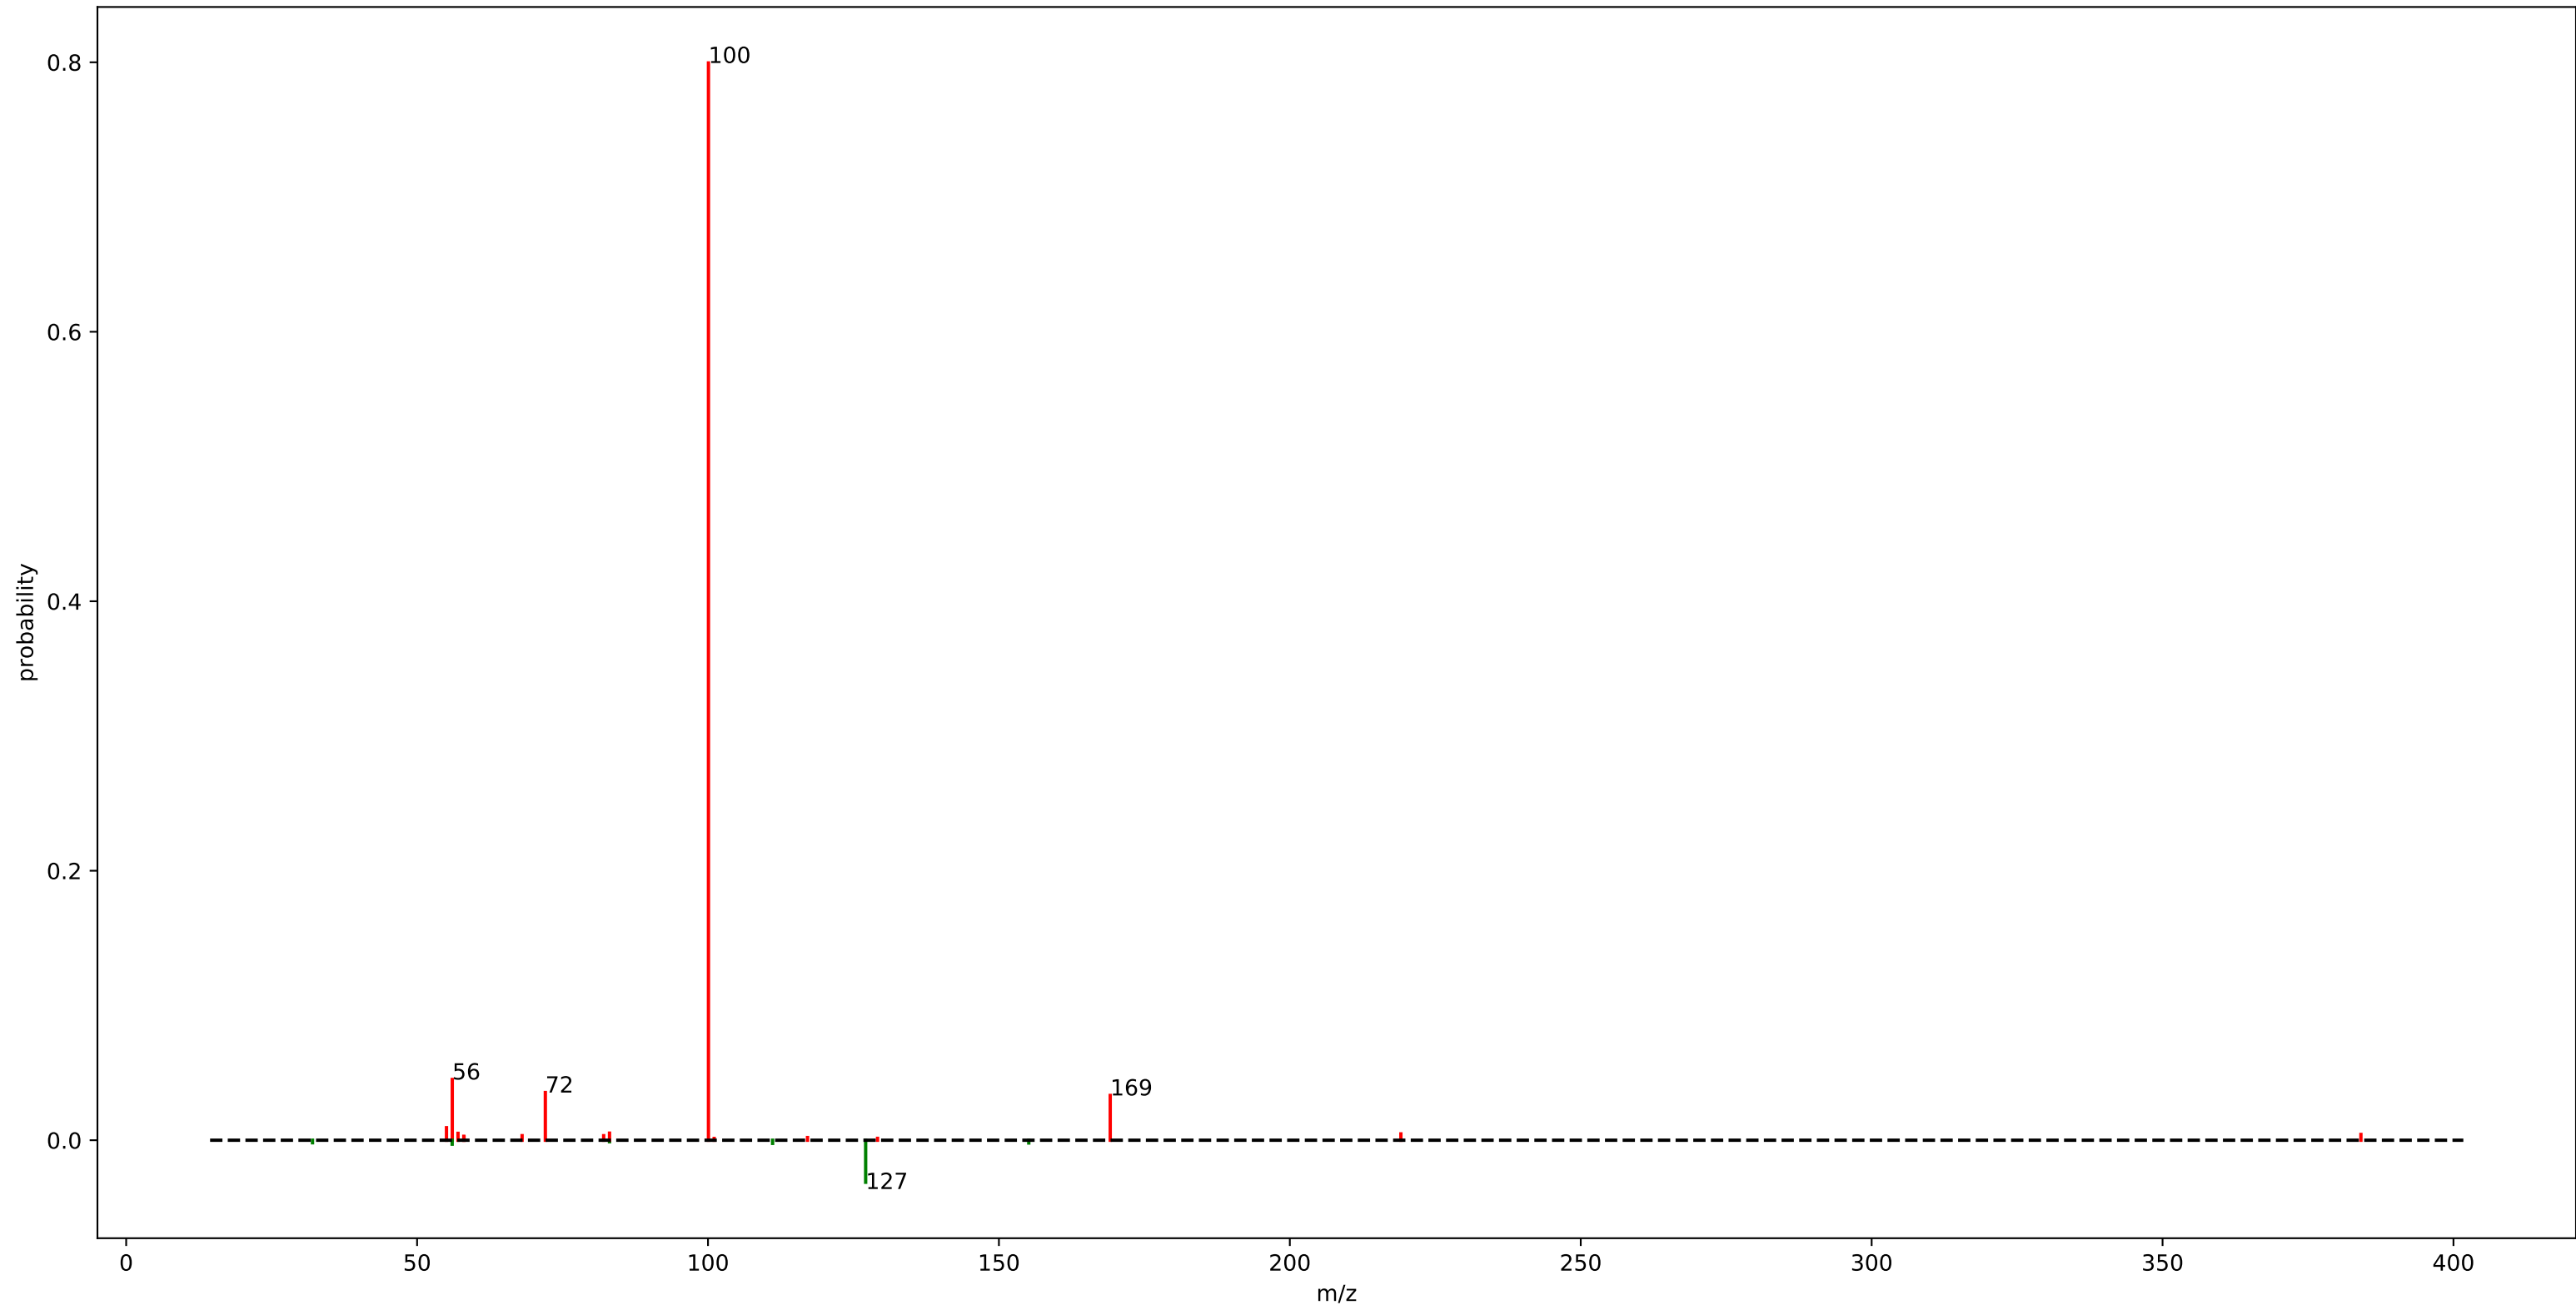

## urine\_mass2motif\_27.m2m

|                   |        |
|-------------------|--------|
| fragment_100.0775 | : 0.80 |
| fragment_56.0475  | : 0.05 |
| fragment_72.0425  | : 0.04 |
| fragment_169.1325 | : 0.03 |
| loss_127.0975     | : 0.03 |
| fragment_55.0525  | : 0.01 |
| fragment_83.0725  | : 0.01 |
| fragment_57.0325  | : 0.01 |

urine\_mass2motif\_141.m2m

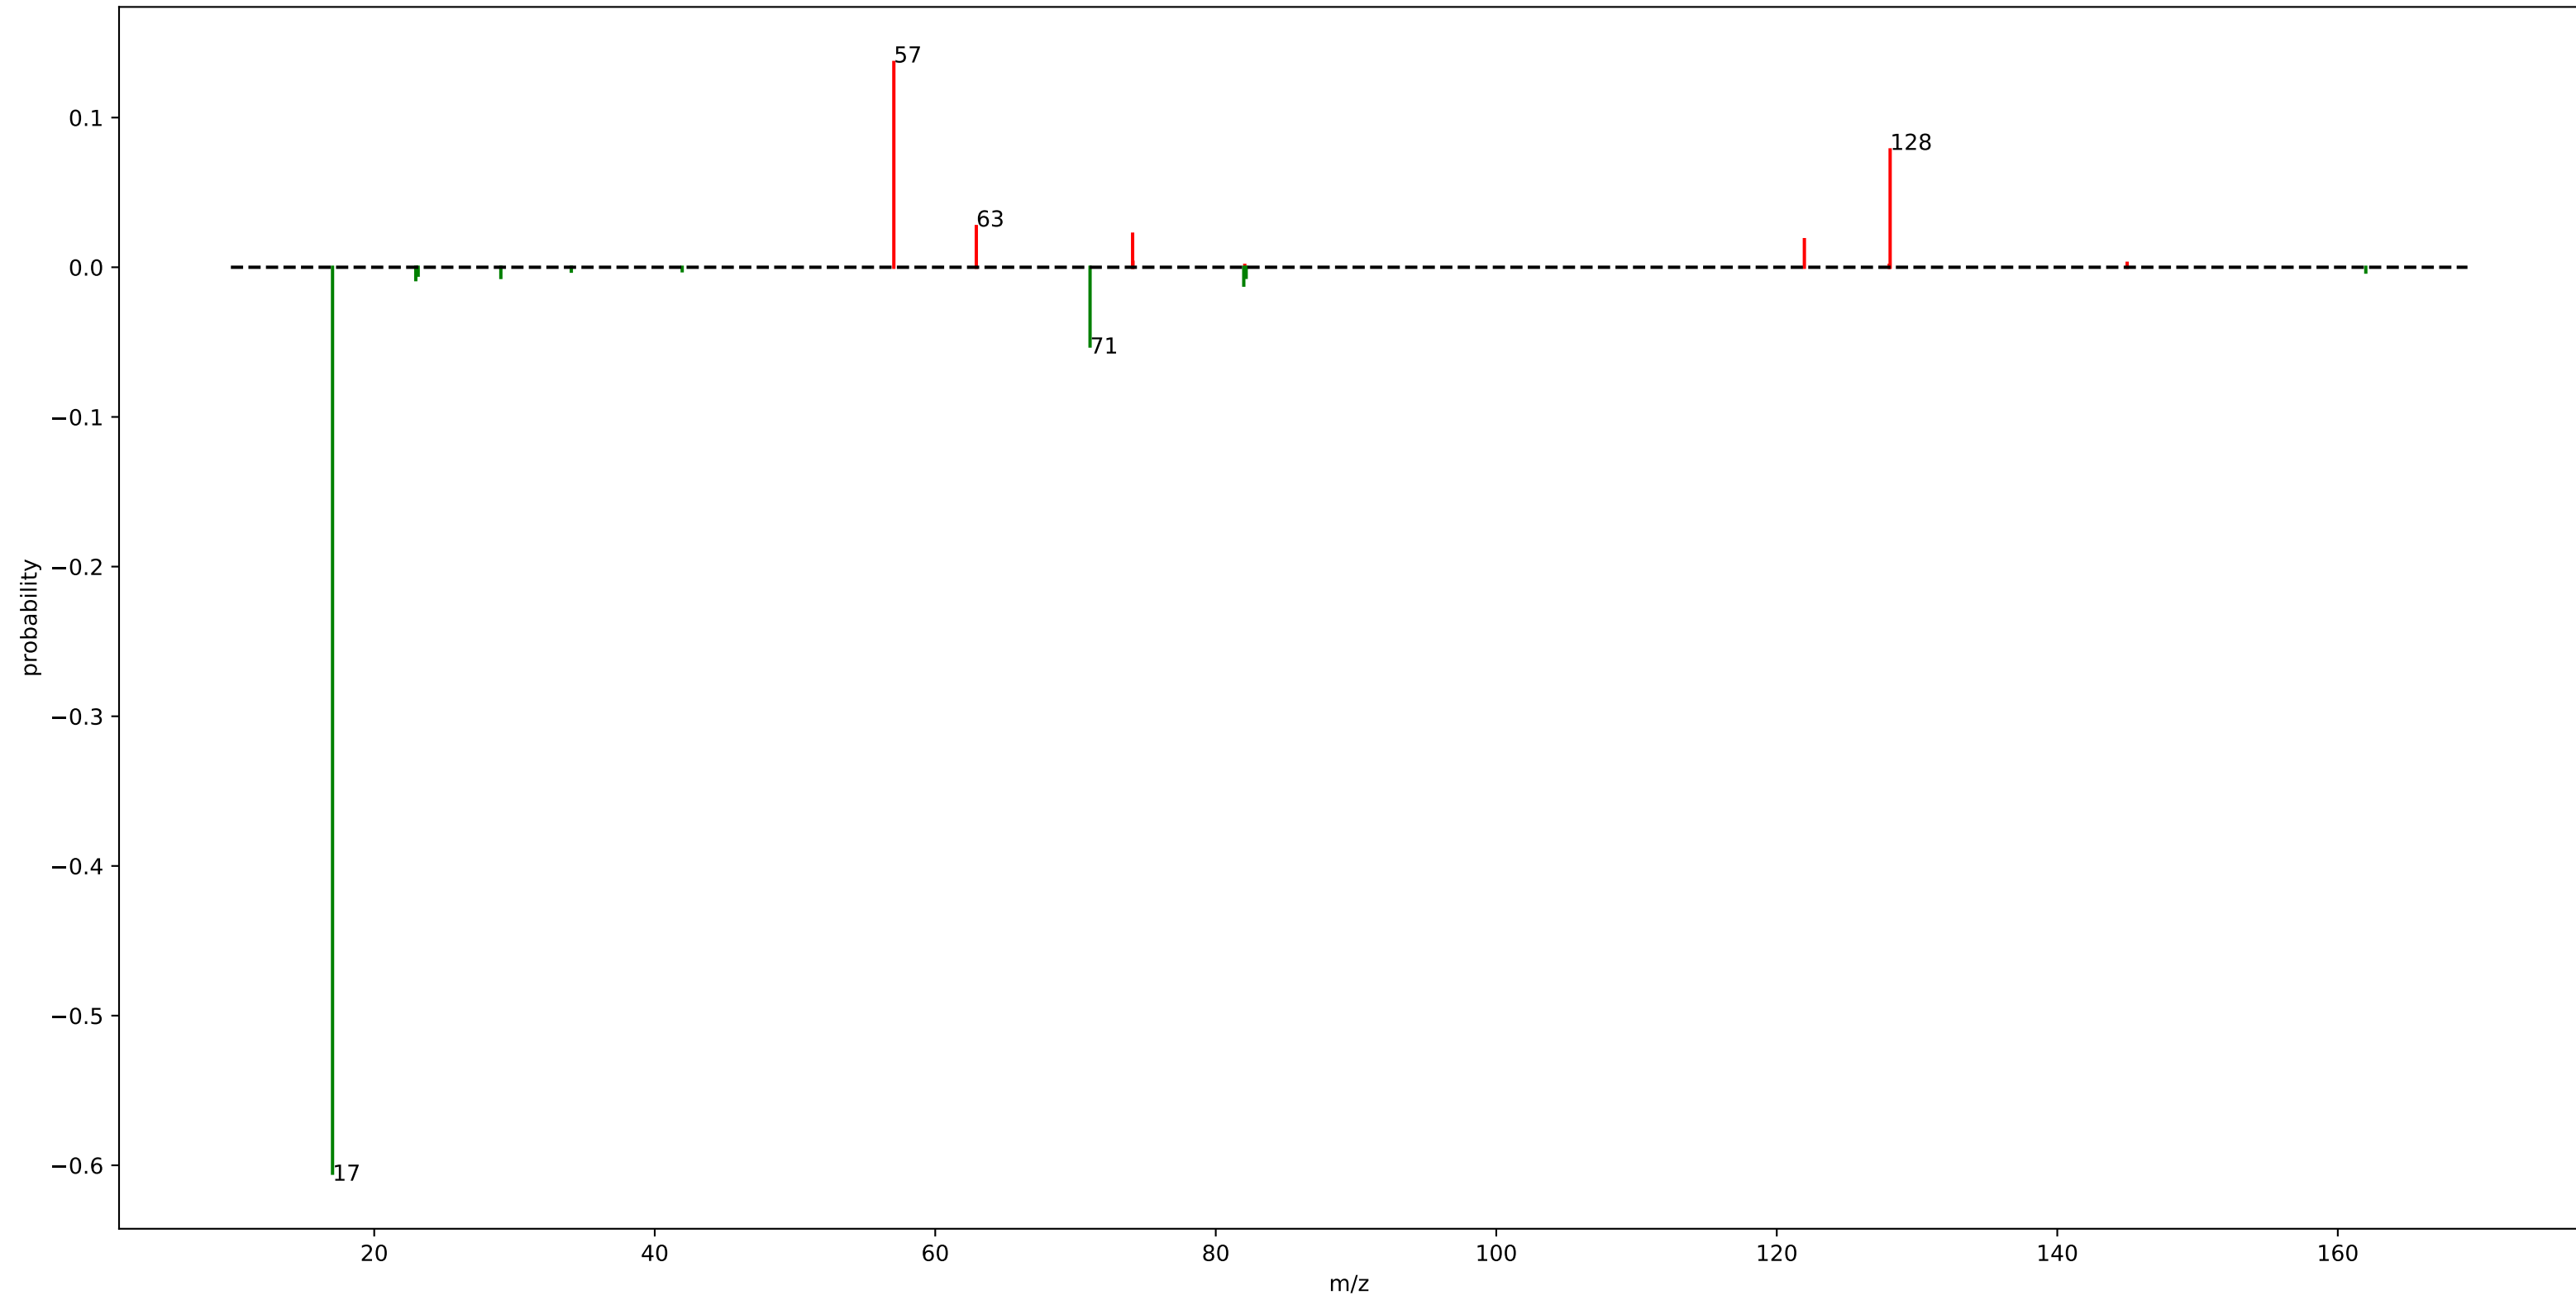

## urine\_mass2motif\_141.m2m

|                   |        |
|-------------------|--------|
| loss_17.0275      | : 0.61 |
| fragment_57.0475  | : 0.14 |
| fragment_128.0825 | : 0.08 |
| loss_71.0375      | : 0.05 |
| fragment_62.9275  | : 0.03 |
| fragment_74.0725  | : 0.02 |
| fragment_121.9675 | : 0.02 |
| loss_81.9975      | : 0.01 |
| loss_22.9625      | : 0.01 |
| loss_29.0275      | : 0.01 |
| loss_82.1675      | : 0.01 |
| loss_23.1325      | : 0.01 |



rhamn\_motif\_169.m2m

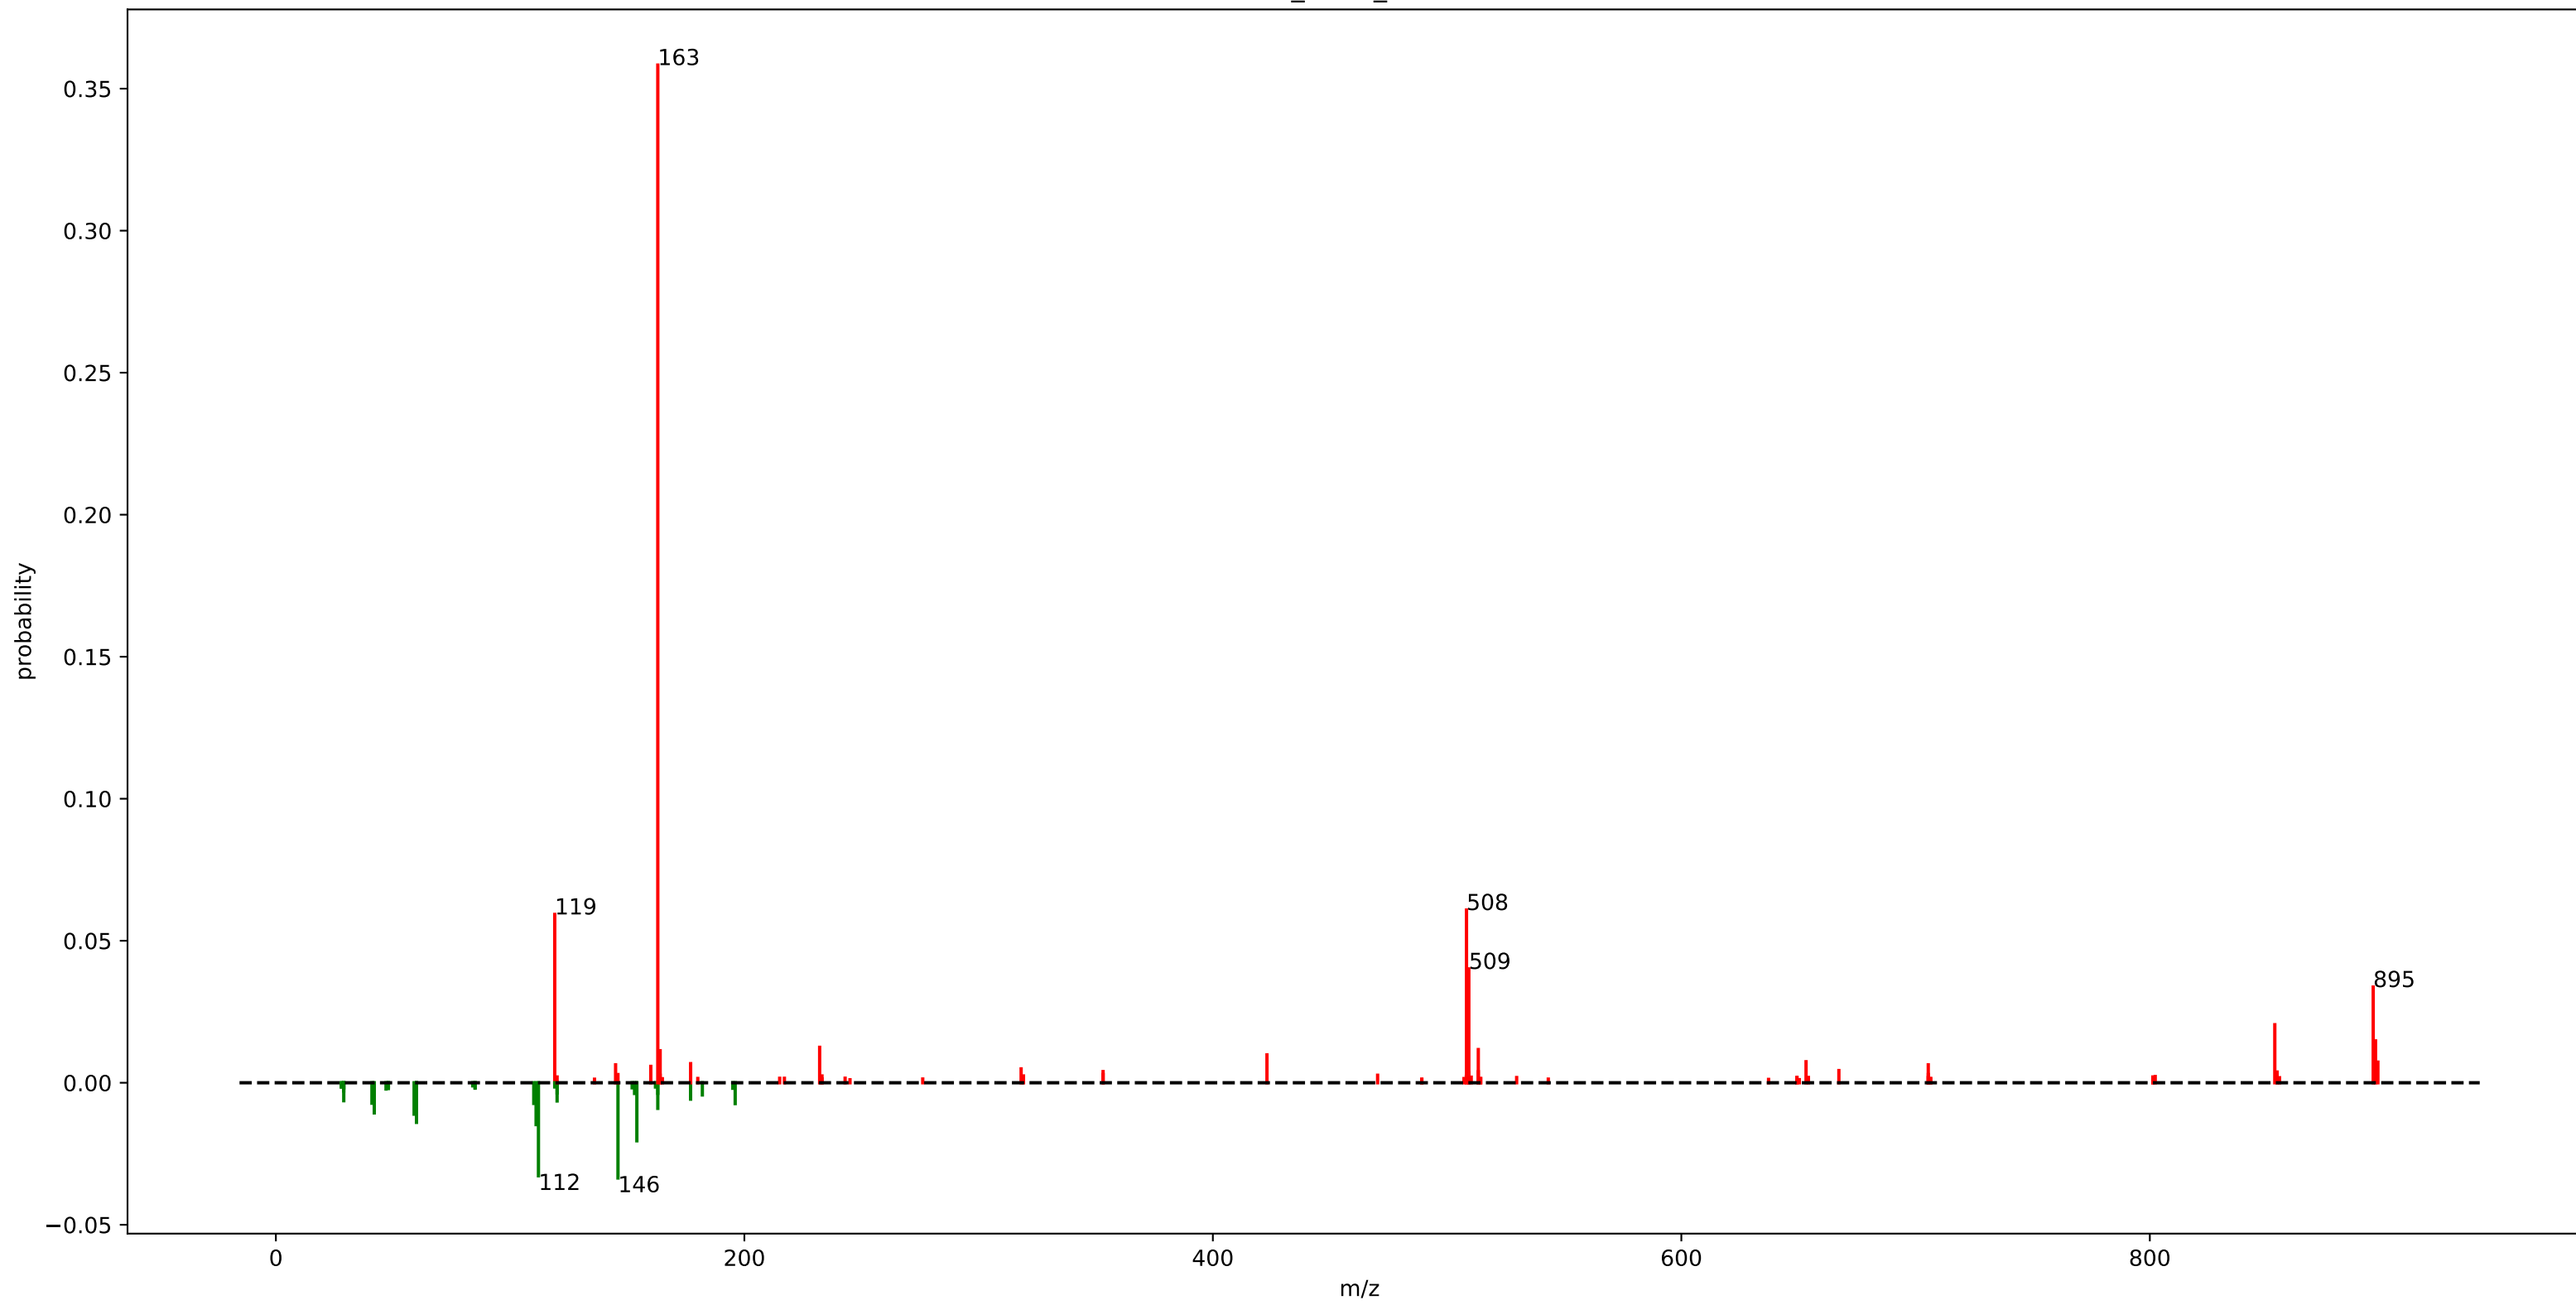

# rhamn\_motif\_169.m2m

|                   |        |                   |        |
|-------------------|--------|-------------------|--------|
| fragment_163.0425 | : 0.36 | fragment_653.2375 | : 0.01 |
| fragment_508.2825 | : 0.06 | loss_196.0775     | : 0.01 |
| fragment_119.0475 | : 0.06 | fragment_897.3625 | : 0.01 |
| fragment_509.2775 | : 0.04 | loss_110.0925     | : 0.01 |
| fragment_895.3625 | : 0.03 | loss_41.0075      | : 0.01 |
| loss_146.0425     | : 0.03 | fragment_177.0575 | : 0.01 |
| loss_112.0925     | : 0.03 | loss_120.0525     | : 0.01 |
| fragment_853.3525 | : 0.02 | loss_28.9775      | : 0.01 |
| loss_154.1025     | : 0.02 | fragment_705.4125 | : 0.01 |
| loss_111.0875     | : 0.01 | fragment_145.0225 | : 0.01 |
| fragment_896.3625 | : 0.01 | fragment_160.0525 | : 0.01 |
| loss_60.0275      | : 0.01 | loss_177.0425     | : 0.01 |
| fragment_232.1375 | : 0.01 |                   |        |
| fragment_513.3225 | : 0.01 |                   |        |
| fragment_164.0425 | : 0.01 |                   |        |
| loss_59.0075      | : 0.01 |                   |        |
| loss_41.9975      | : 0.01 |                   |        |
| fragment_423.1025 | : 0.01 |                   |        |
| loss_60.0025      | : 0.01 |                   |        |
| loss_163.0425     | : 0.01 |                   |        |

rhamn\_motif\_149.m2m

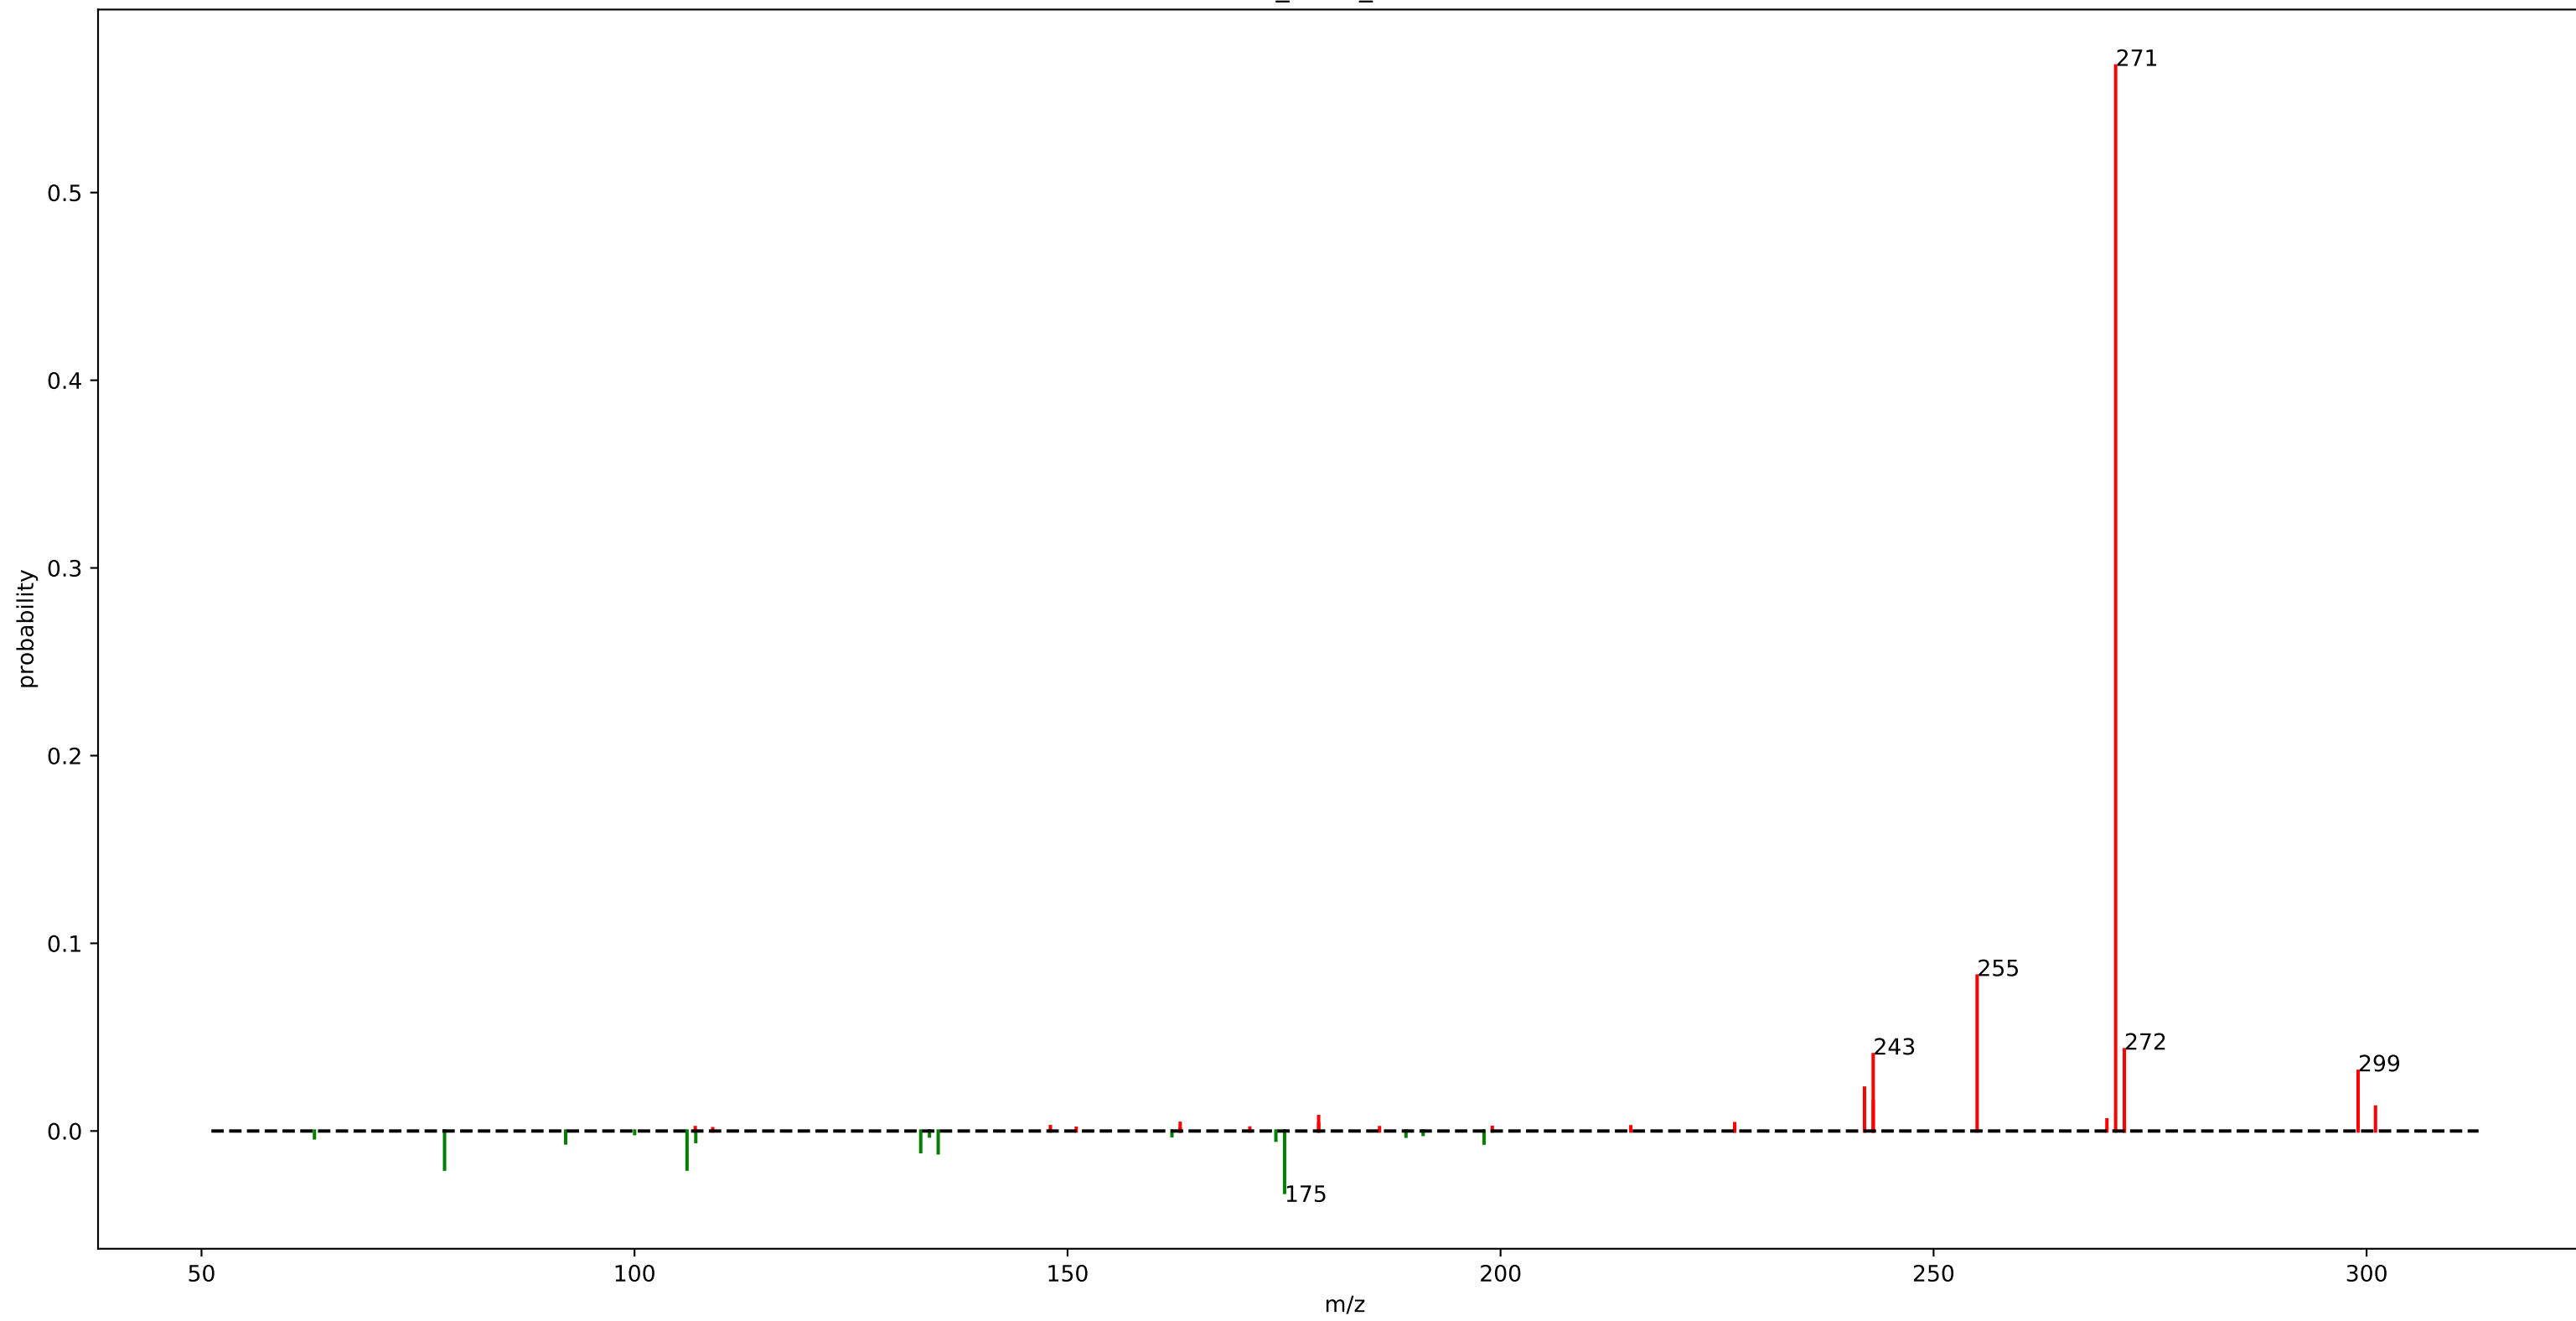

## rhamn\_motif\_149.m2m

|                   |        |
|-------------------|--------|
| fragment_271.0225 | : 0.57 |
| fragment_255.0275 | : 0.08 |
| fragment_272.0275 | : 0.04 |
| fragment_243.0275 | : 0.04 |
| loss_175.0625     | : 0.03 |
| fragment_299.0175 | : 0.03 |
| fragment_242.0225 | : 0.02 |
| loss_78.0675      | : 0.02 |
| loss_106.0625     | : 0.02 |
| fragment_243.0325 | : 0.02 |
| fragment_301.0275 | : 0.01 |
| loss_135.0675     | : 0.01 |
| loss_133.0475     | : 0.01 |
| fragment_178.9925 | : 0.01 |
| loss_198.0925     | : 0.01 |
| loss_92.0475      | : 0.01 |
| fragment_270.0125 | : 0.01 |
| loss_107.0725     | : 0.01 |

urine\_mass2motif\_239.m2m

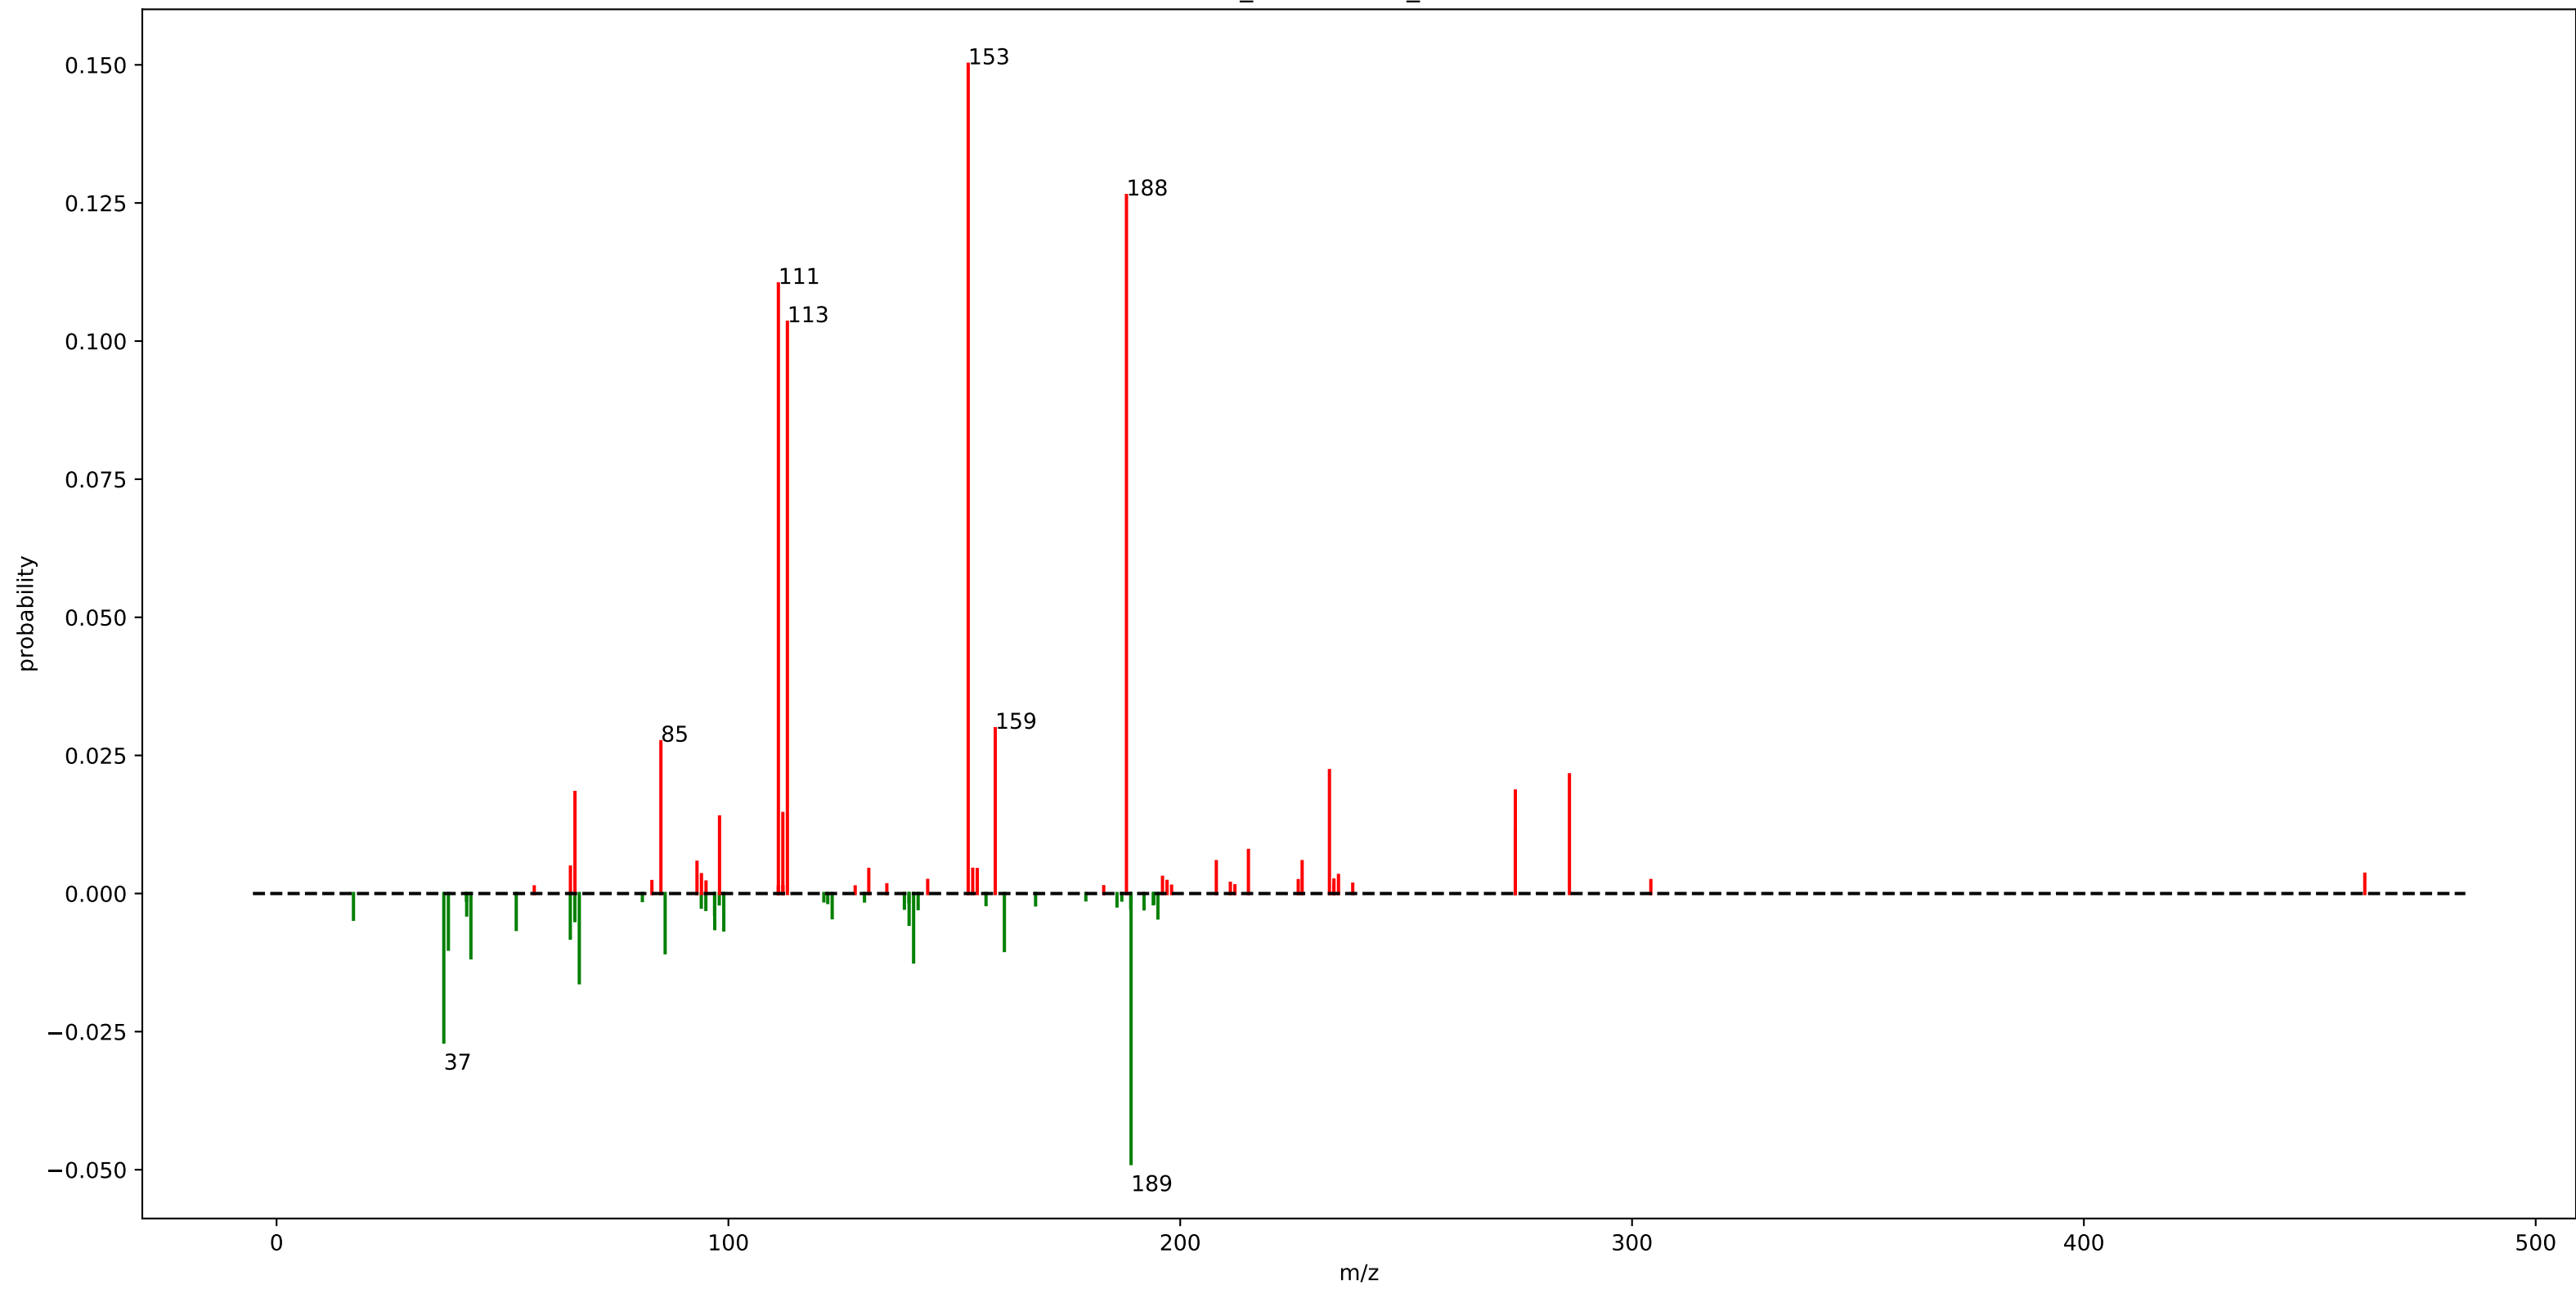

# urine\_mass2motif\_239.m2m

|                   |        |                   |        |
|-------------------|--------|-------------------|--------|
| fragment_153.0775 | : 0.15 | loss_38.0275      | : 0.01 |
| fragment_188.1025 | : 0.13 | loss_65.0125      | : 0.01 |
| fragment_111.0625 | : 0.11 | fragment_215.0925 | : 0.01 |
| fragment_113.0575 | : 0.10 | loss_98.9775      | : 0.01 |
| loss_189.1225     | : 0.05 | loss_53.0475      | : 0.01 |
| fragment_159.0675 | : 0.03 | loss_96.9775      | : 0.01 |
| fragment_85.0625  | : 0.03 | fragment_207.9875 | : 0.01 |
| loss_37.0175      | : 0.03 | fragment_226.9825 | : 0.01 |
| fragment_233.0275 | : 0.02 | fragment_93.0525  | : 0.01 |
| fragment_286.1425 | : 0.02 | loss_139.9975     | : 0.01 |
| fragment_274.1675 | : 0.02 |                   |        |
| fragment_66.0425  | : 0.02 |                   |        |
| loss_67.0025      | : 0.02 |                   |        |
| fragment_112.0475 | : 0.01 |                   |        |
| fragment_98.0375  | : 0.01 |                   |        |
| loss_140.9925     | : 0.01 |                   |        |
| loss_43.0125      | : 0.01 |                   |        |
| fragment_274.1625 | : 0.01 |                   |        |
| loss_86.0025      | : 0.01 |                   |        |
| loss_161.0825     | : 0.01 |                   |        |

rhabdus\_motif\_64.m2m

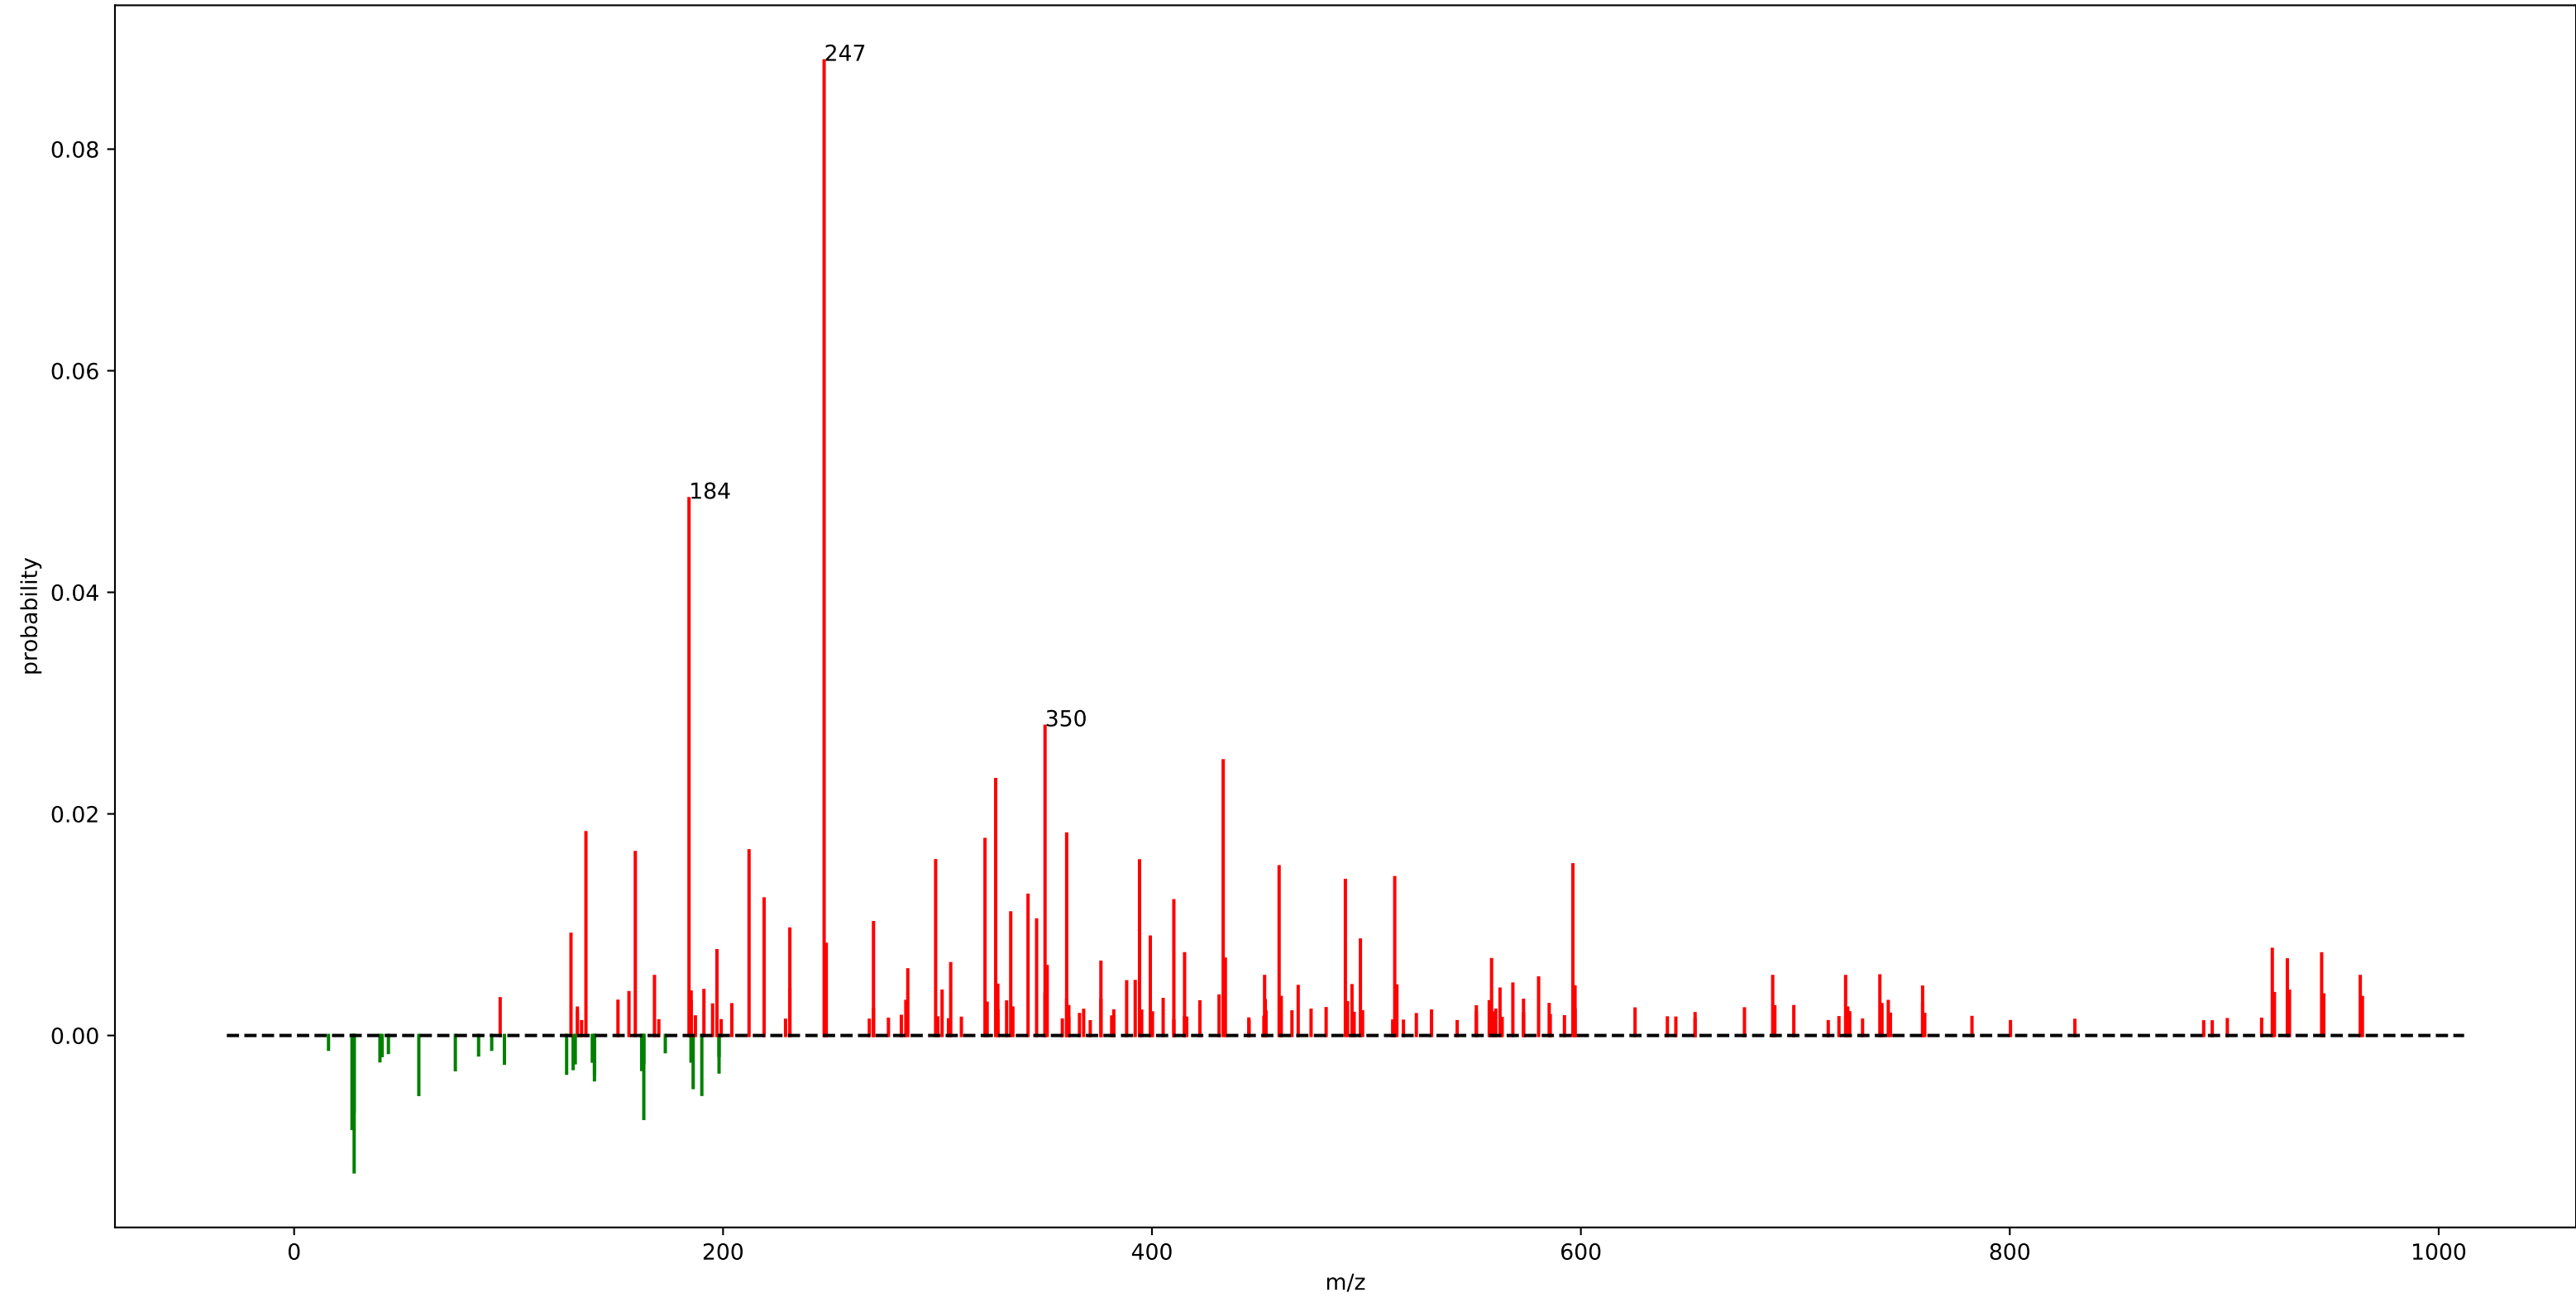

# rhabdus\_motif\_64.m2m

|                   |        |                   |        |                   |        |
|-------------------|--------|-------------------|--------|-------------------|--------|
| fragment_247.1425 | : 0.09 | fragment_334.1525 | : 0.01 | fragment_351.1525 | : 0.01 |
| fragment_184.1325 | : 0.05 | fragment_346.2125 | : 0.01 | fragment_286.1525 | : 0.01 |
| fragment_350.1475 | : 0.03 | fragment_270.1625 | : 0.01 | fragment_739.4175 | : 0.01 |
| fragment_433.2225 | : 0.02 | fragment_231.1475 | : 0.01 | fragment_452.5225 | : 0.01 |
| fragment_327.1325 | : 0.02 | fragment_129.1025 | : 0.01 | fragment_168.0325 | : 0.01 |
| fragment_136.0725 | : 0.02 | fragment_399.2375 | : 0.01 | loss_58.1475      | : 0.01 |
| fragment_360.2275 | : 0.02 | fragment_497.2175 | : 0.01 | fragment_689.4575 | : 0.01 |
| fragment_322.1525 | : 0.02 | loss_26.9875      | : 0.01 | fragment_963.4375 | : 0.01 |
| fragment_212.1275 | : 0.02 | fragment_248.1475 | : 0.01 | fragment_723.4475 | : 0.01 |
| fragment_159.0925 | : 0.02 | fragment_922.4125 | : 0.01 | loss_190.1075     | : 0.01 |
| fragment_299.1375 | : 0.02 | fragment_197.1625 | : 0.01 | fragment_580.2925 | : 0.01 |
| fragment_394.2125 | : 0.02 | loss_163.0575     | : 0.01 |                   |        |
| fragment_596.2875 | : 0.02 | fragment_415.2125 | : 0.01 |                   |        |
| fragment_459.2975 | : 0.02 | fragment_945.4275 | : 0.01 |                   |        |
| fragment_513.2125 | : 0.01 | fragment_434.2275 | : 0.01 |                   |        |
| fragment_490.1975 | : 0.01 | fragment_558.3625 | : 0.01 |                   |        |
| fragment_342.2175 | : 0.01 | fragment_929.4325 | : 0.01 |                   |        |
| fragment_219.1475 | : 0.01 | loss_27.9875      | : 0.01 |                   |        |
| loss_27.9925      | : 0.01 | fragment_376.2025 | : 0.01 |                   |        |
| fragment_410.2075 | : 0.01 | fragment_306.1625 | : 0.01 |                   |        |



motif\_492

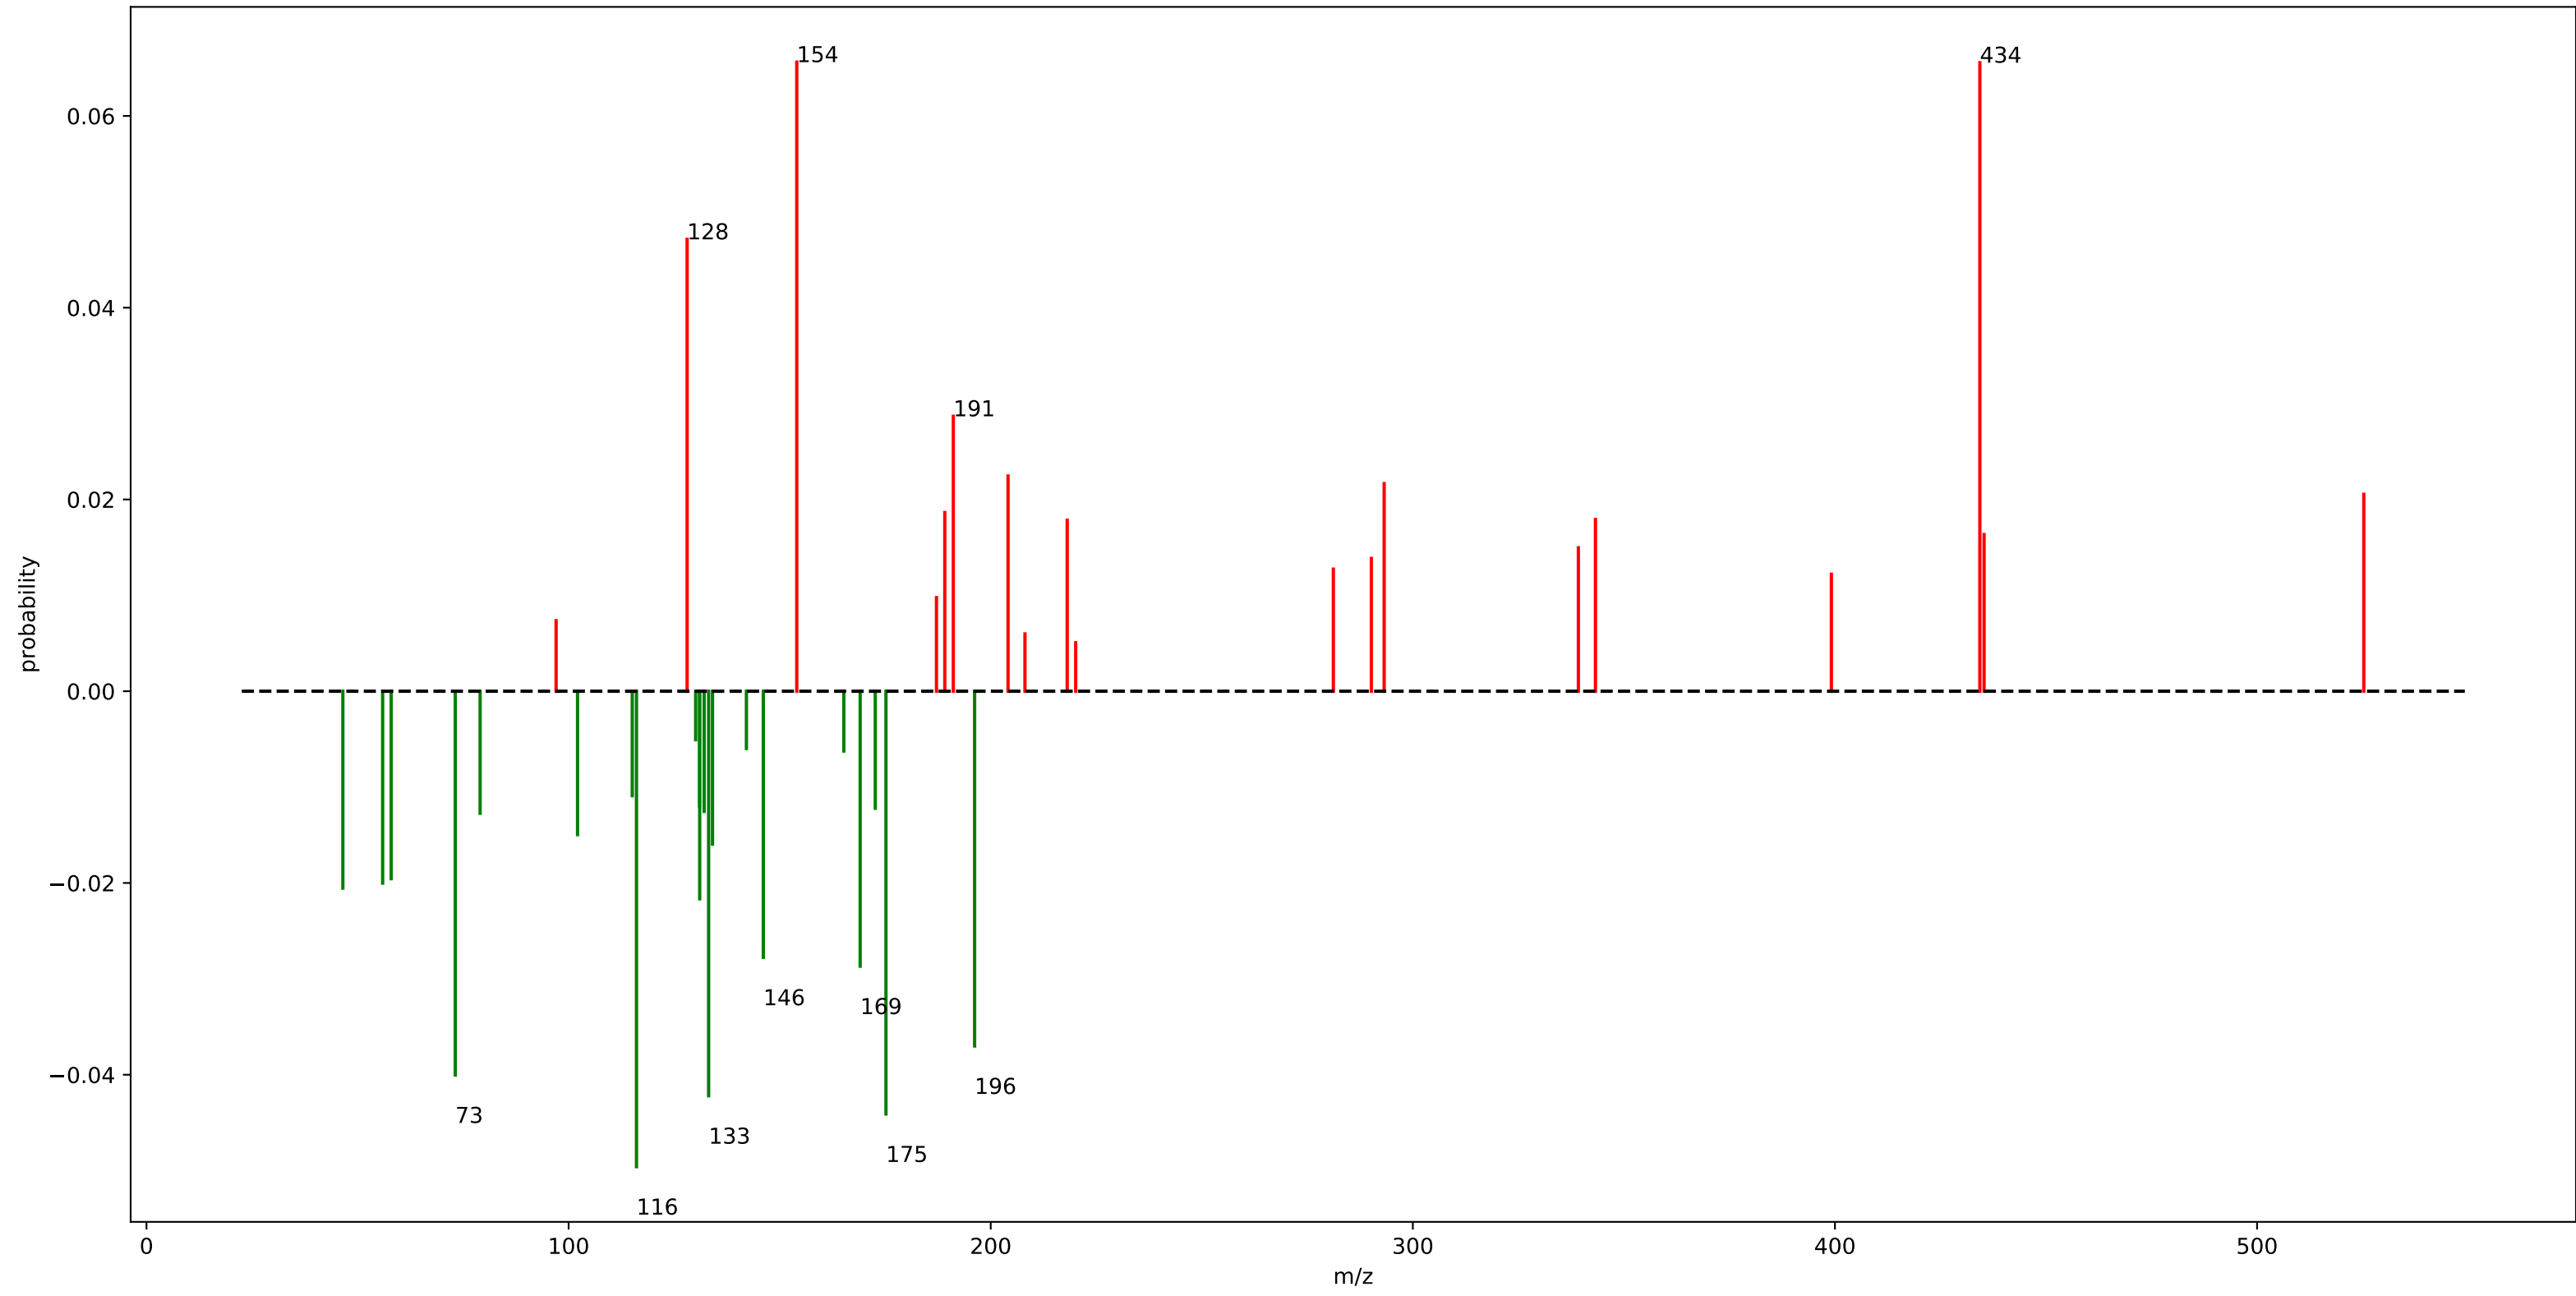

## motif\_492

|                   |        |                   |        |
|-------------------|--------|-------------------|--------|
| fragment_154.0525 | : 0.07 | fragment_218.1175 | : 0.02 |
| fragment_434.3225 | : 0.07 | fragment_435.3275 | : 0.02 |
| loss_116.0825     | : 0.05 | loss_134.0925     | : 0.02 |
| fragment_128.0725 | : 0.05 | fragment_339.2125 | : 0.01 |
| loss_175.1825     | : 0.04 | loss_102.1175     | : 0.01 |
| loss_133.1725     | : 0.04 | fragment_290.1675 | : 0.01 |
| loss_73.1525      | : 0.04 | loss_79.0375      | : 0.01 |
| loss_196.1825     | : 0.04 | fragment_281.1725 | : 0.01 |
| fragment_191.1425 | : 0.03 | loss_132.1125     | : 0.01 |
| loss_169.0725     | : 0.03 | fragment_399.1525 | : 0.01 |
| loss_146.1275     | : 0.03 | loss_172.6475     | : 0.01 |
| fragment_204.1025 | : 0.02 | loss_131.0175     | : 0.01 |
| fragment_293.2075 | : 0.02 | loss_115.0775     | : 0.01 |
| loss_131.0575     | : 0.02 | fragment_187.1475 | : 0.01 |
| fragment_525.2825 | : 0.02 | fragment_97.0375  | : 0.01 |
| loss_46.5175      | : 0.02 | loss_165.2025     | : 0.01 |
| loss_55.9475      | : 0.02 | loss_142.1225     | : 0.01 |
| loss_57.9675      | : 0.02 | fragment_208.1125 | : 0.01 |
| fragment_189.1225 | : 0.02 | loss_130.0975     | : 0.01 |
| fragment_343.2625 | : 0.02 | fragment_220.1325 | : 0.01 |

motif\_493

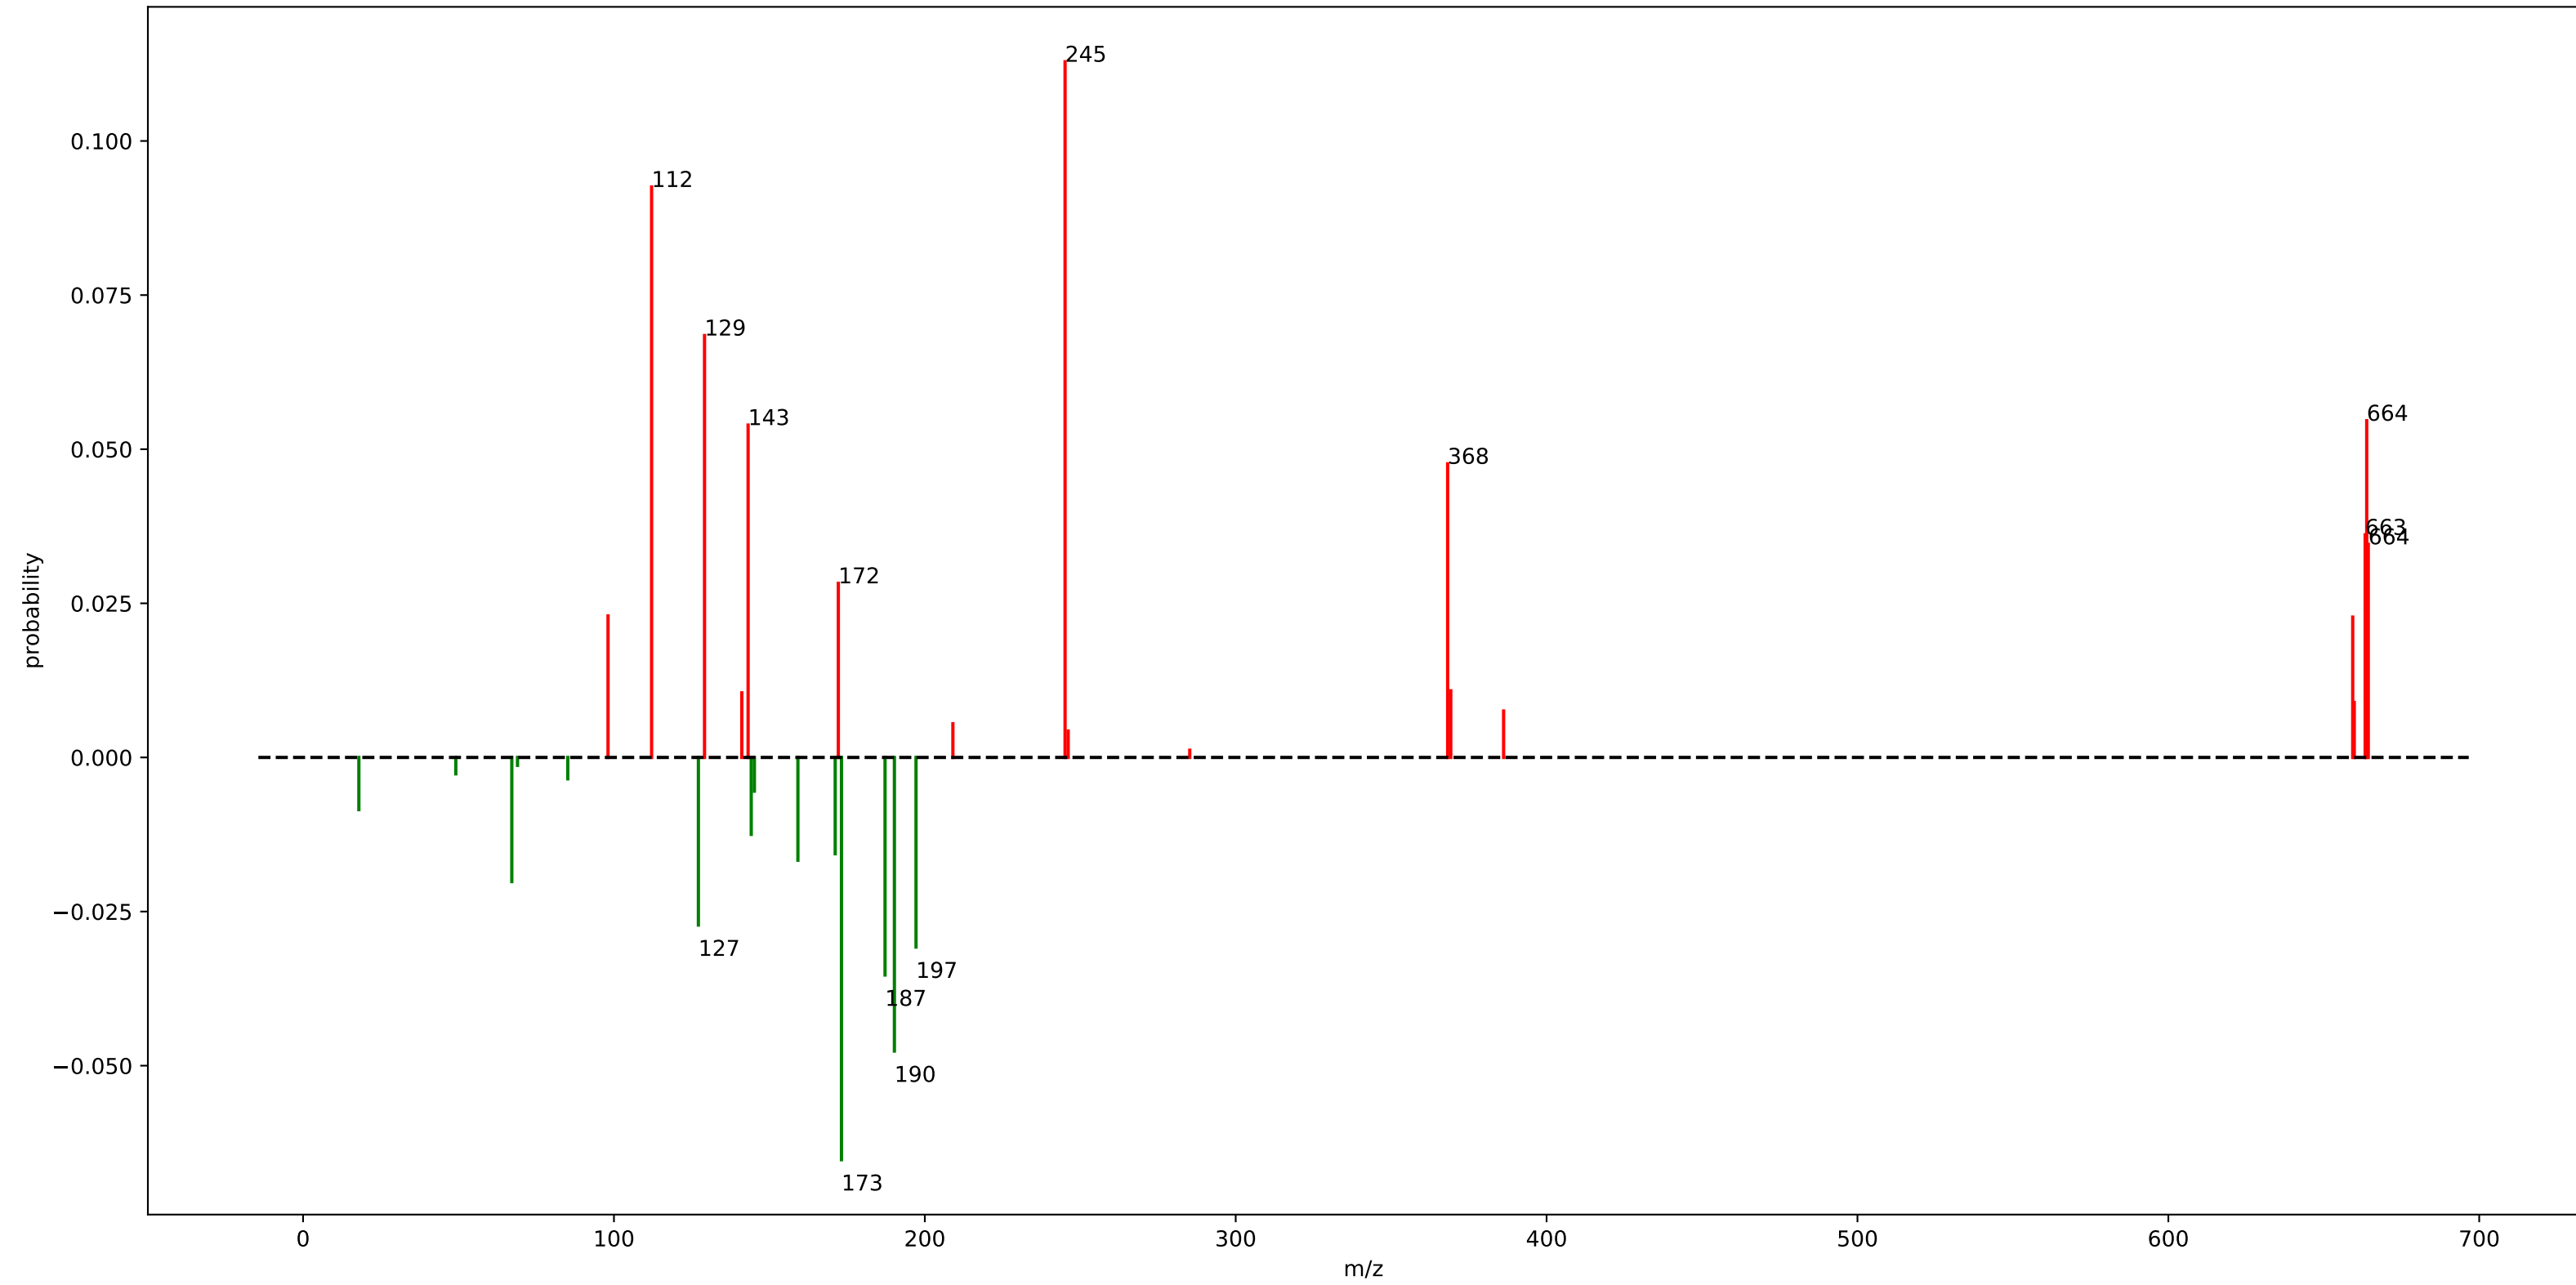

## motif\_493

|                   |        |                   |        |
|-------------------|--------|-------------------|--------|
| fragment_245.1125 | : 0.11 | fragment_369.1825 | : 0.01 |
| fragment_112.1125 | : 0.09 | fragment_141.1375 | : 0.01 |
| fragment_129.1375 | : 0.07 | fragment_659.8075 | : 0.01 |
| loss_173.1875     | : 0.07 | loss_17.9475      | : 0.01 |
| fragment_663.8125 | : 0.05 | fragment_386.1775 | : 0.01 |
| fragment_143.1525 | : 0.05 | loss_145.1725     | : 0.01 |
| loss_190.2125     | : 0.05 | fragment_209.0275 | : 0.01 |
| fragment_368.1775 | : 0.05 |                   |        |
| fragment_663.3075 | : 0.04 |                   |        |
| loss_187.2025     | : 0.04 |                   |        |
| fragment_664.3125 | : 0.03 |                   |        |
| loss_197.1675     | : 0.03 |                   |        |
| fragment_172.1775 | : 0.03 |                   |        |
| loss_127.1625     | : 0.03 |                   |        |
| fragment_98.0975  | : 0.02 |                   |        |
| fragment_659.3075 | : 0.02 |                   |        |
| loss_67.1425      | : 0.02 |                   |        |
| loss_159.1725     | : 0.02 |                   |        |
| loss_171.1725     | : 0.02 |                   |        |
| loss_144.1625     | : 0.01 |                   |        |

motif\_490

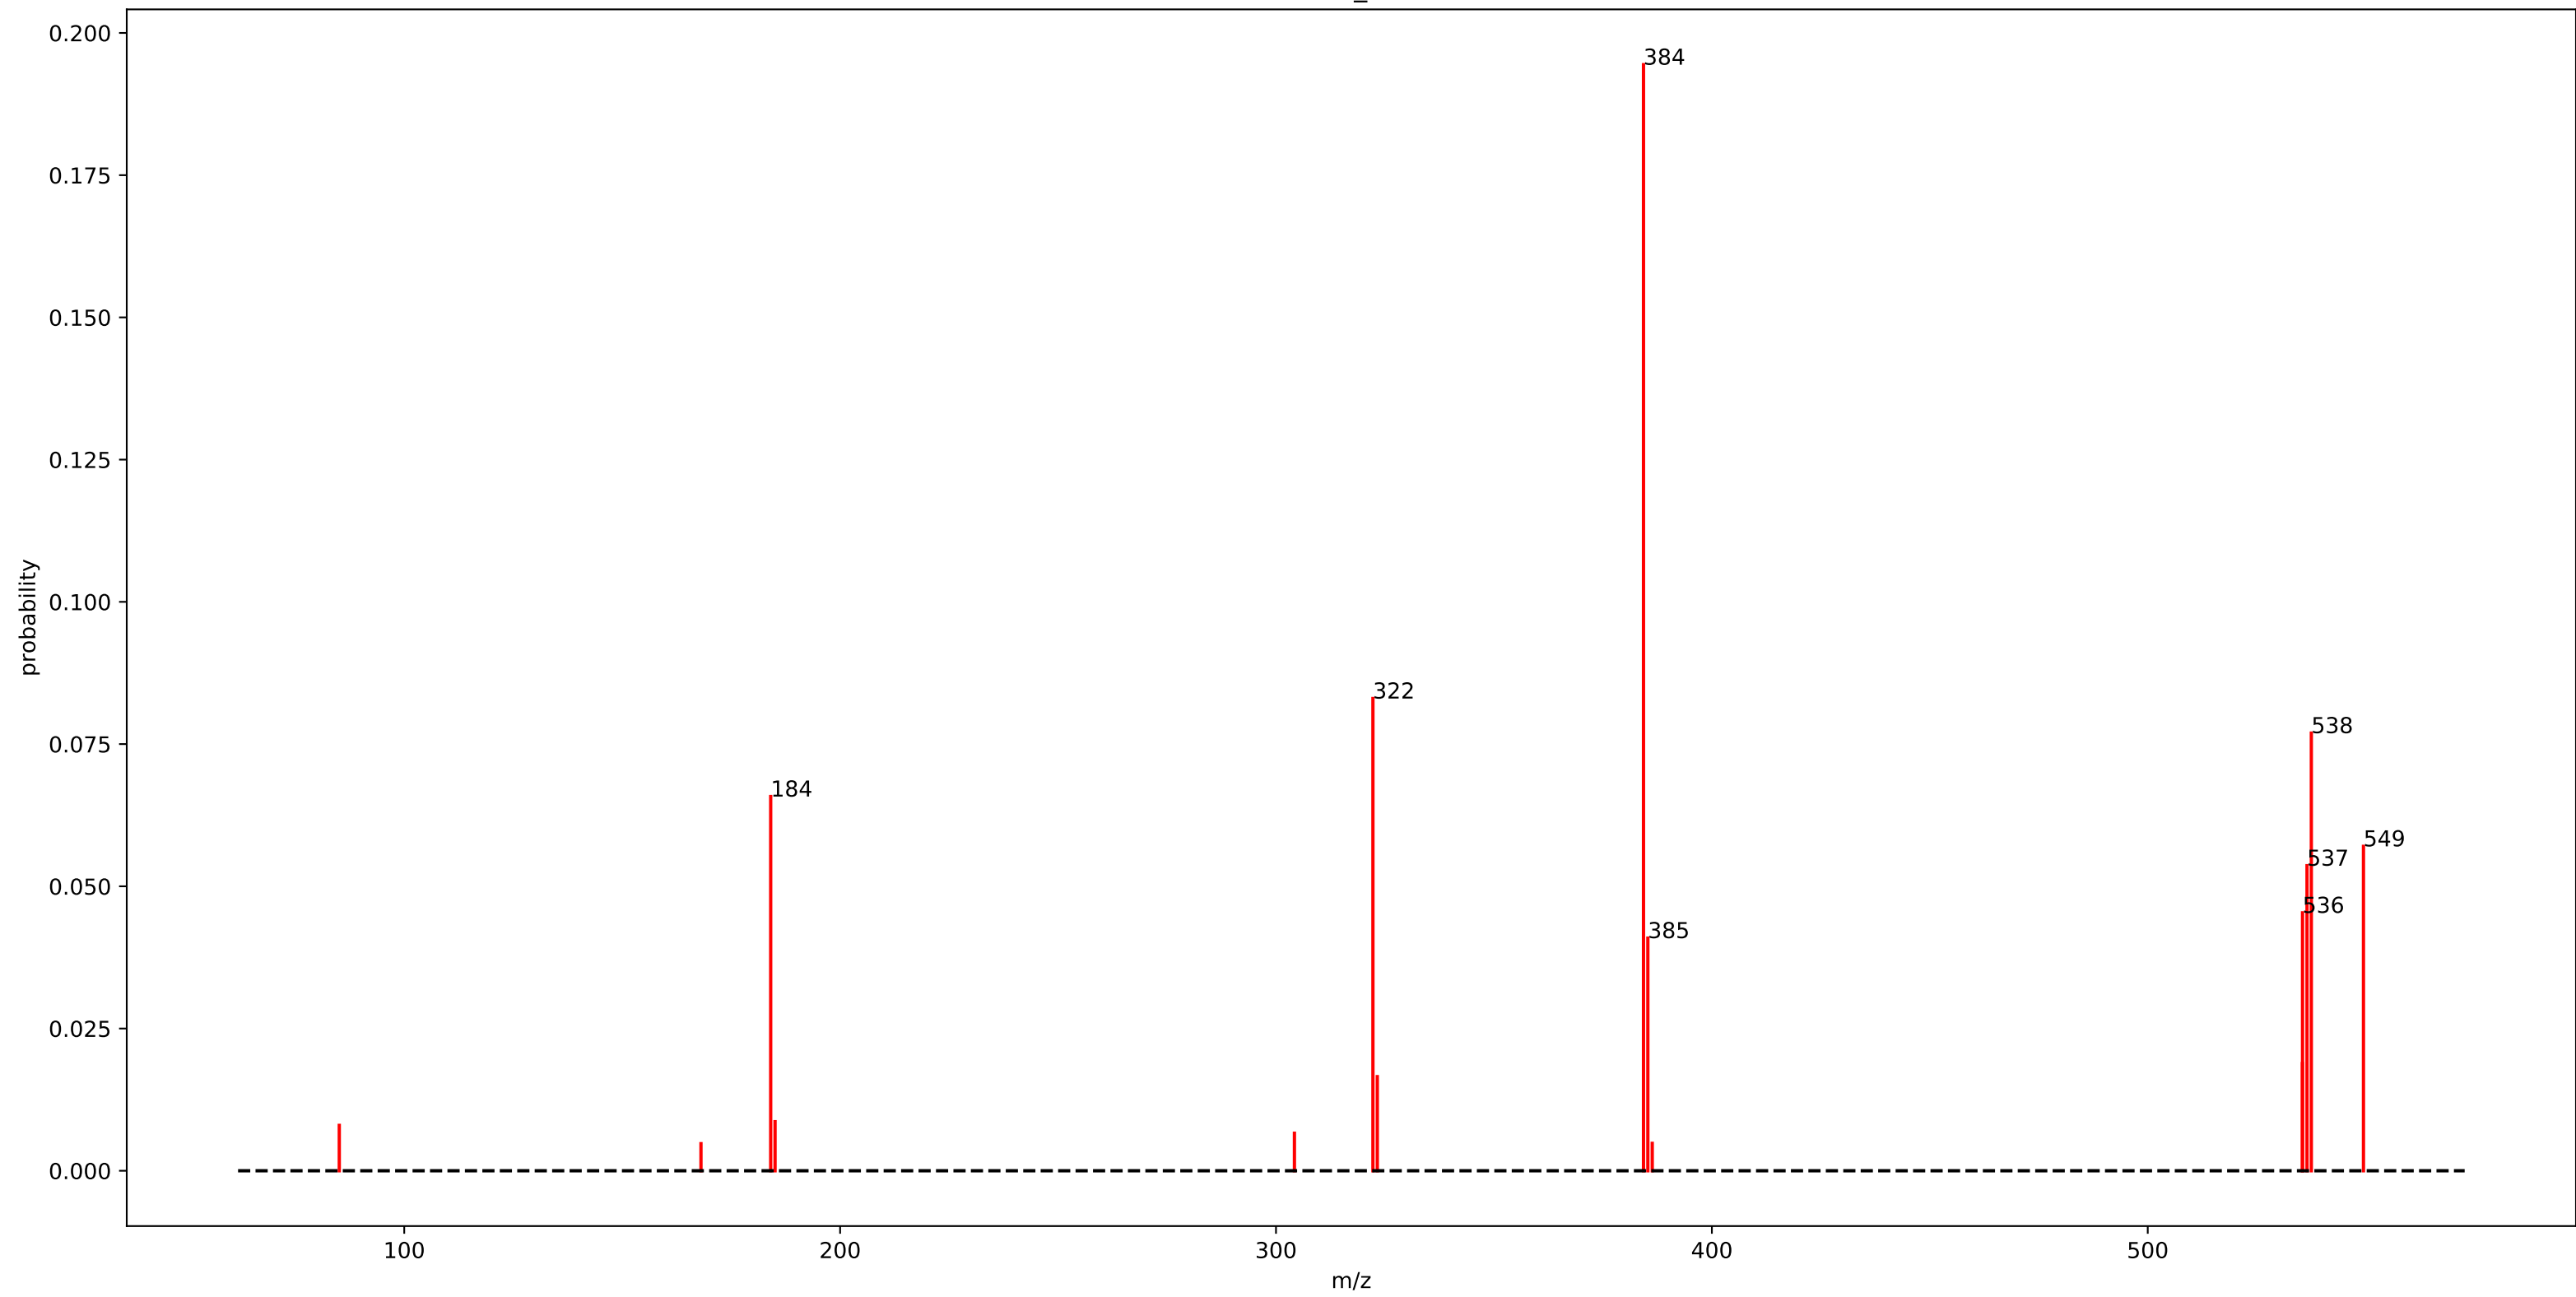

## motif\_490

|                   |        |
|-------------------|--------|
| fragment_384.3125 | : 0.19 |
| fragment_322.2375 | : 0.08 |
| fragment_537.5275 | : 0.08 |
| fragment_184.0725 | : 0.07 |
| fragment_549.4875 | : 0.06 |
| fragment_536.5375 | : 0.05 |
| fragment_535.5075 | : 0.05 |
| fragment_385.3125 | : 0.04 |
| fragment_535.4725 | : 0.02 |
| fragment_323.2425 | : 0.02 |
| fragment_185.0725 | : 0.01 |
| fragment_85.0975  | : 0.01 |
| fragment_304.2275 | : 0.01 |

motif\_491

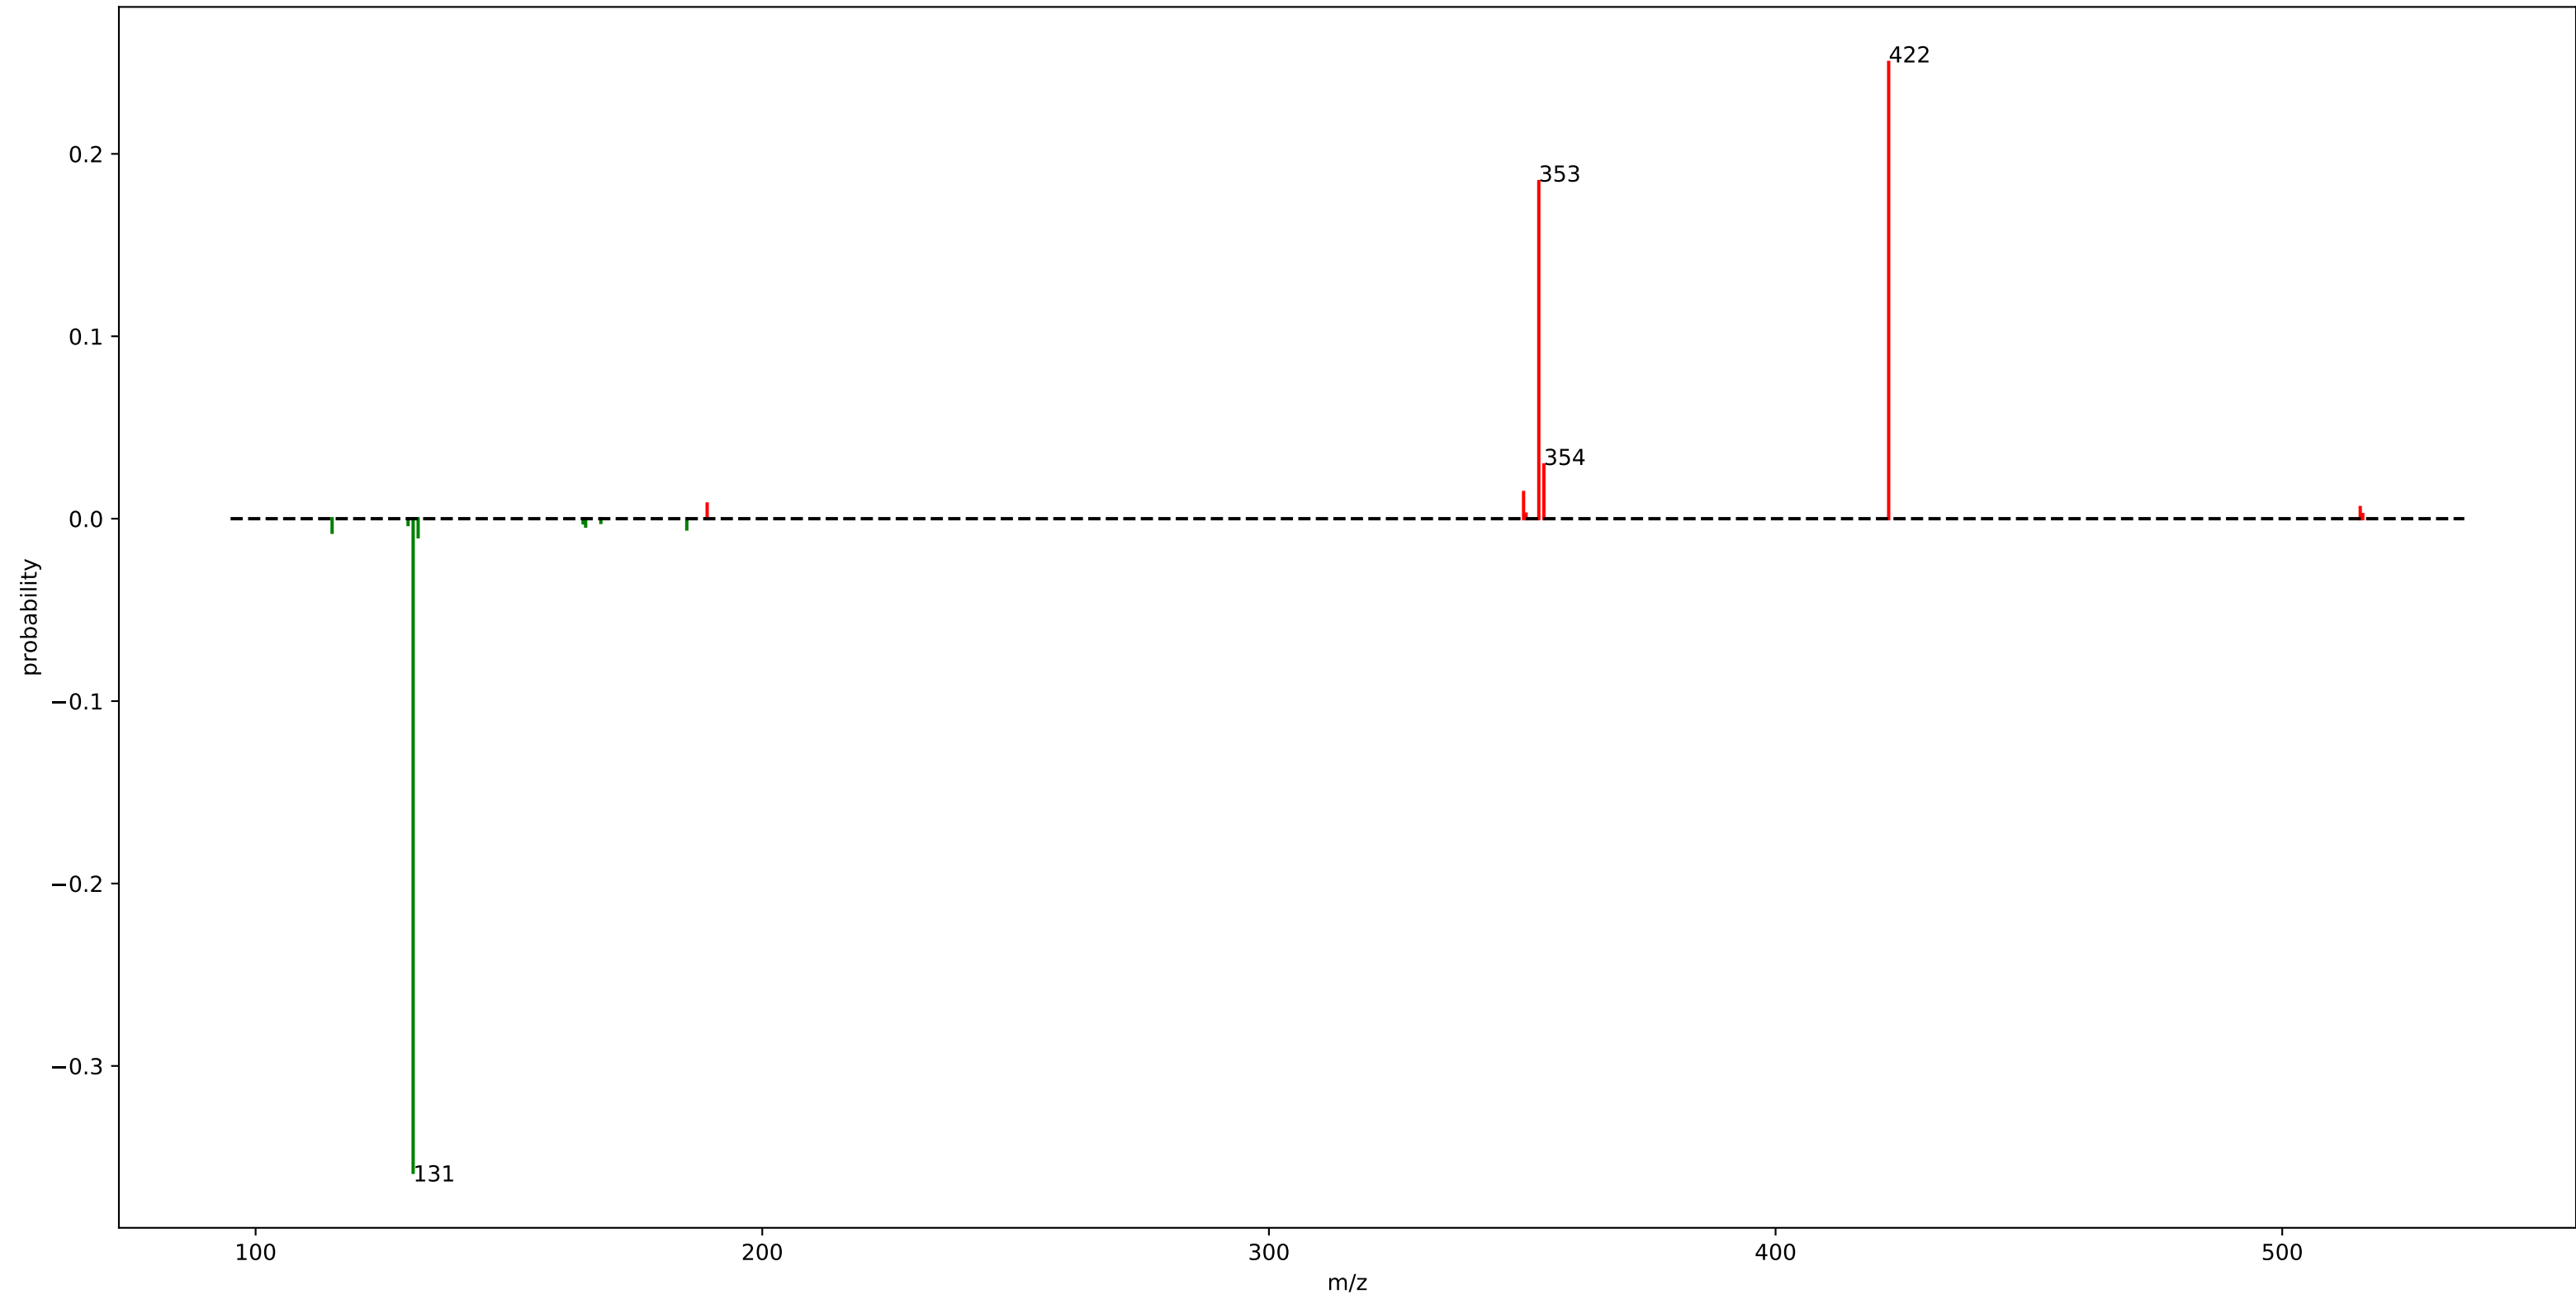

## motif\_491

|                   |        |
|-------------------|--------|
| loss_131.0925     | : 0.36 |
| fragment_422.3225 | : 0.25 |
| fragment_353.2675 | : 0.18 |
| fragment_354.2675 | : 0.03 |
| fragment_350.2625 | : 0.01 |
| loss_132.0775     | : 0.01 |
| fragment_189.1225 | : 0.01 |
| loss_115.0975     | : 0.01 |
| fragment_515.3975 | : 0.01 |
| loss_185.1025     | : 0.01 |



motif\_496

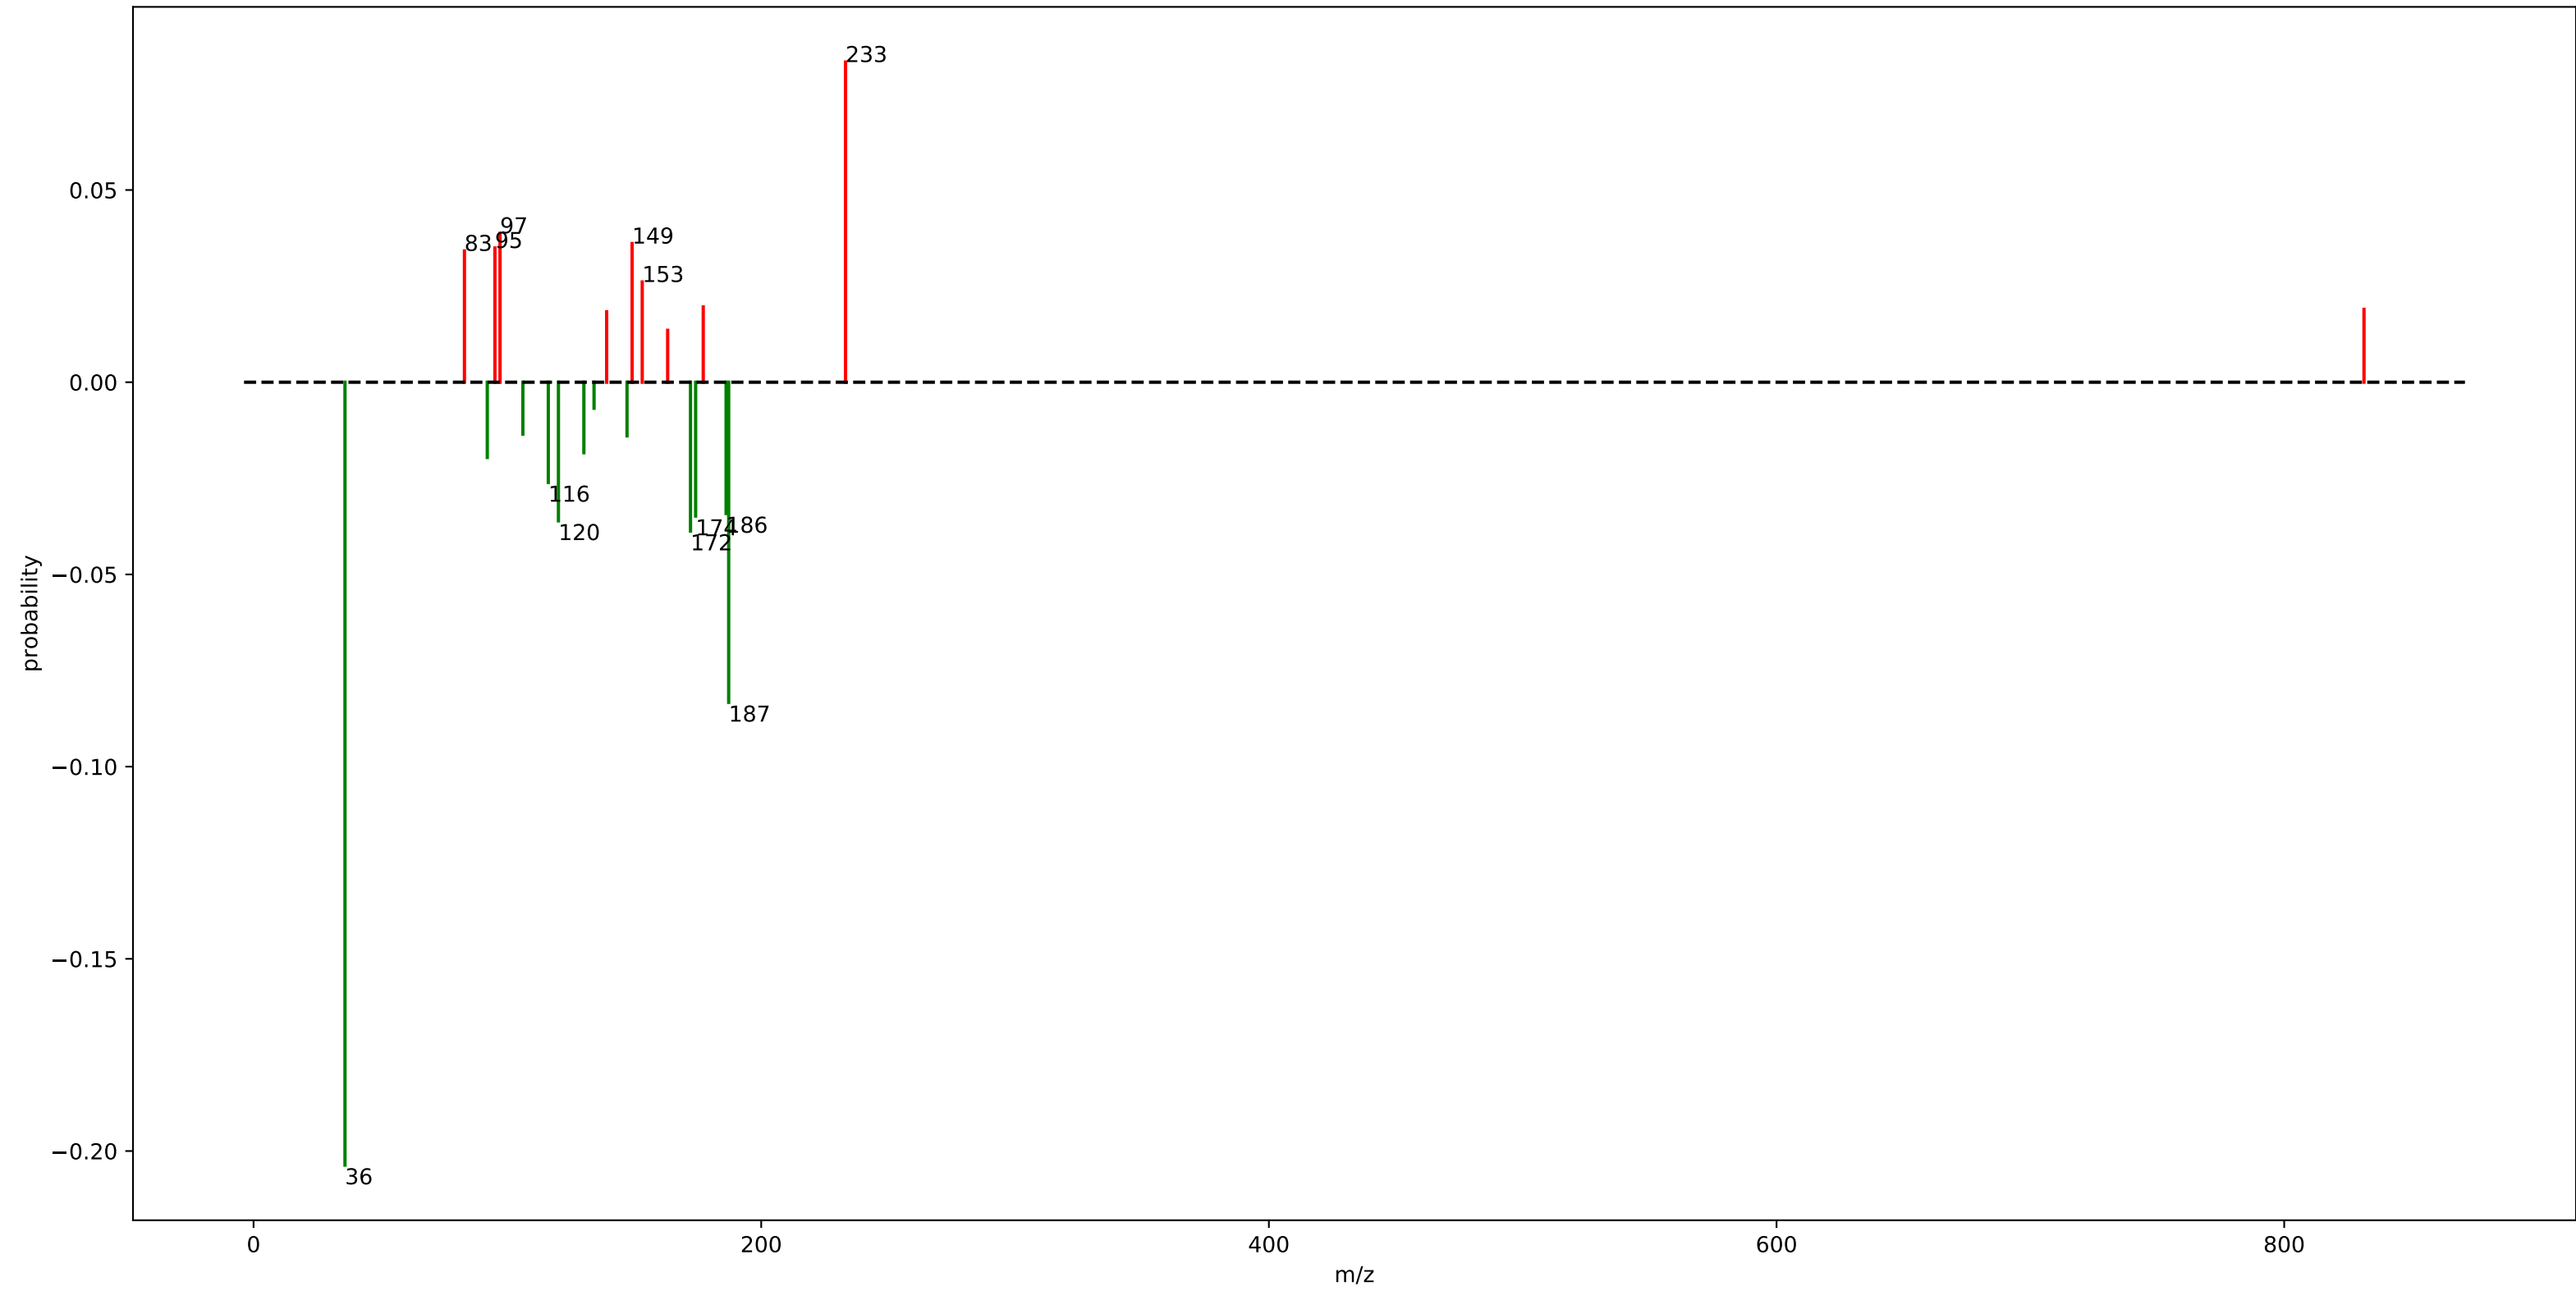

## motif\_496

|                   |        |               |        |
|-------------------|--------|---------------|--------|
| loss_36.0175      | : 0.20 | loss_106.0975 | : 0.01 |
| fragment_233.2275 | : 0.08 | loss_134.1375 | : 0.01 |
| loss_187.1825     | : 0.08 |               |        |
| loss_172.1425     | : 0.04 |               |        |
| fragment_97.1025  | : 0.04 |               |        |
| fragment_149.1325 | : 0.04 |               |        |
| loss_120.1125     | : 0.04 |               |        |
| fragment_95.0825  | : 0.03 |               |        |
| loss_174.1625     | : 0.03 |               |        |
| loss_186.1625     | : 0.03 |               |        |
| fragment_83.0825  | : 0.03 |               |        |
| loss_116.1175     | : 0.03 |               |        |
| fragment_153.1275 | : 0.03 |               |        |
| fragment_177.1625 | : 0.02 |               |        |
| loss_92.0825      | : 0.02 |               |        |
| fragment_831.4425 | : 0.02 |               |        |
| fragment_139.1125 | : 0.02 |               |        |
| loss_130.1325     | : 0.02 |               |        |
| loss_147.1325     | : 0.01 |               |        |
| fragment_163.1475 | : 0.01 |               |        |

motif\_497

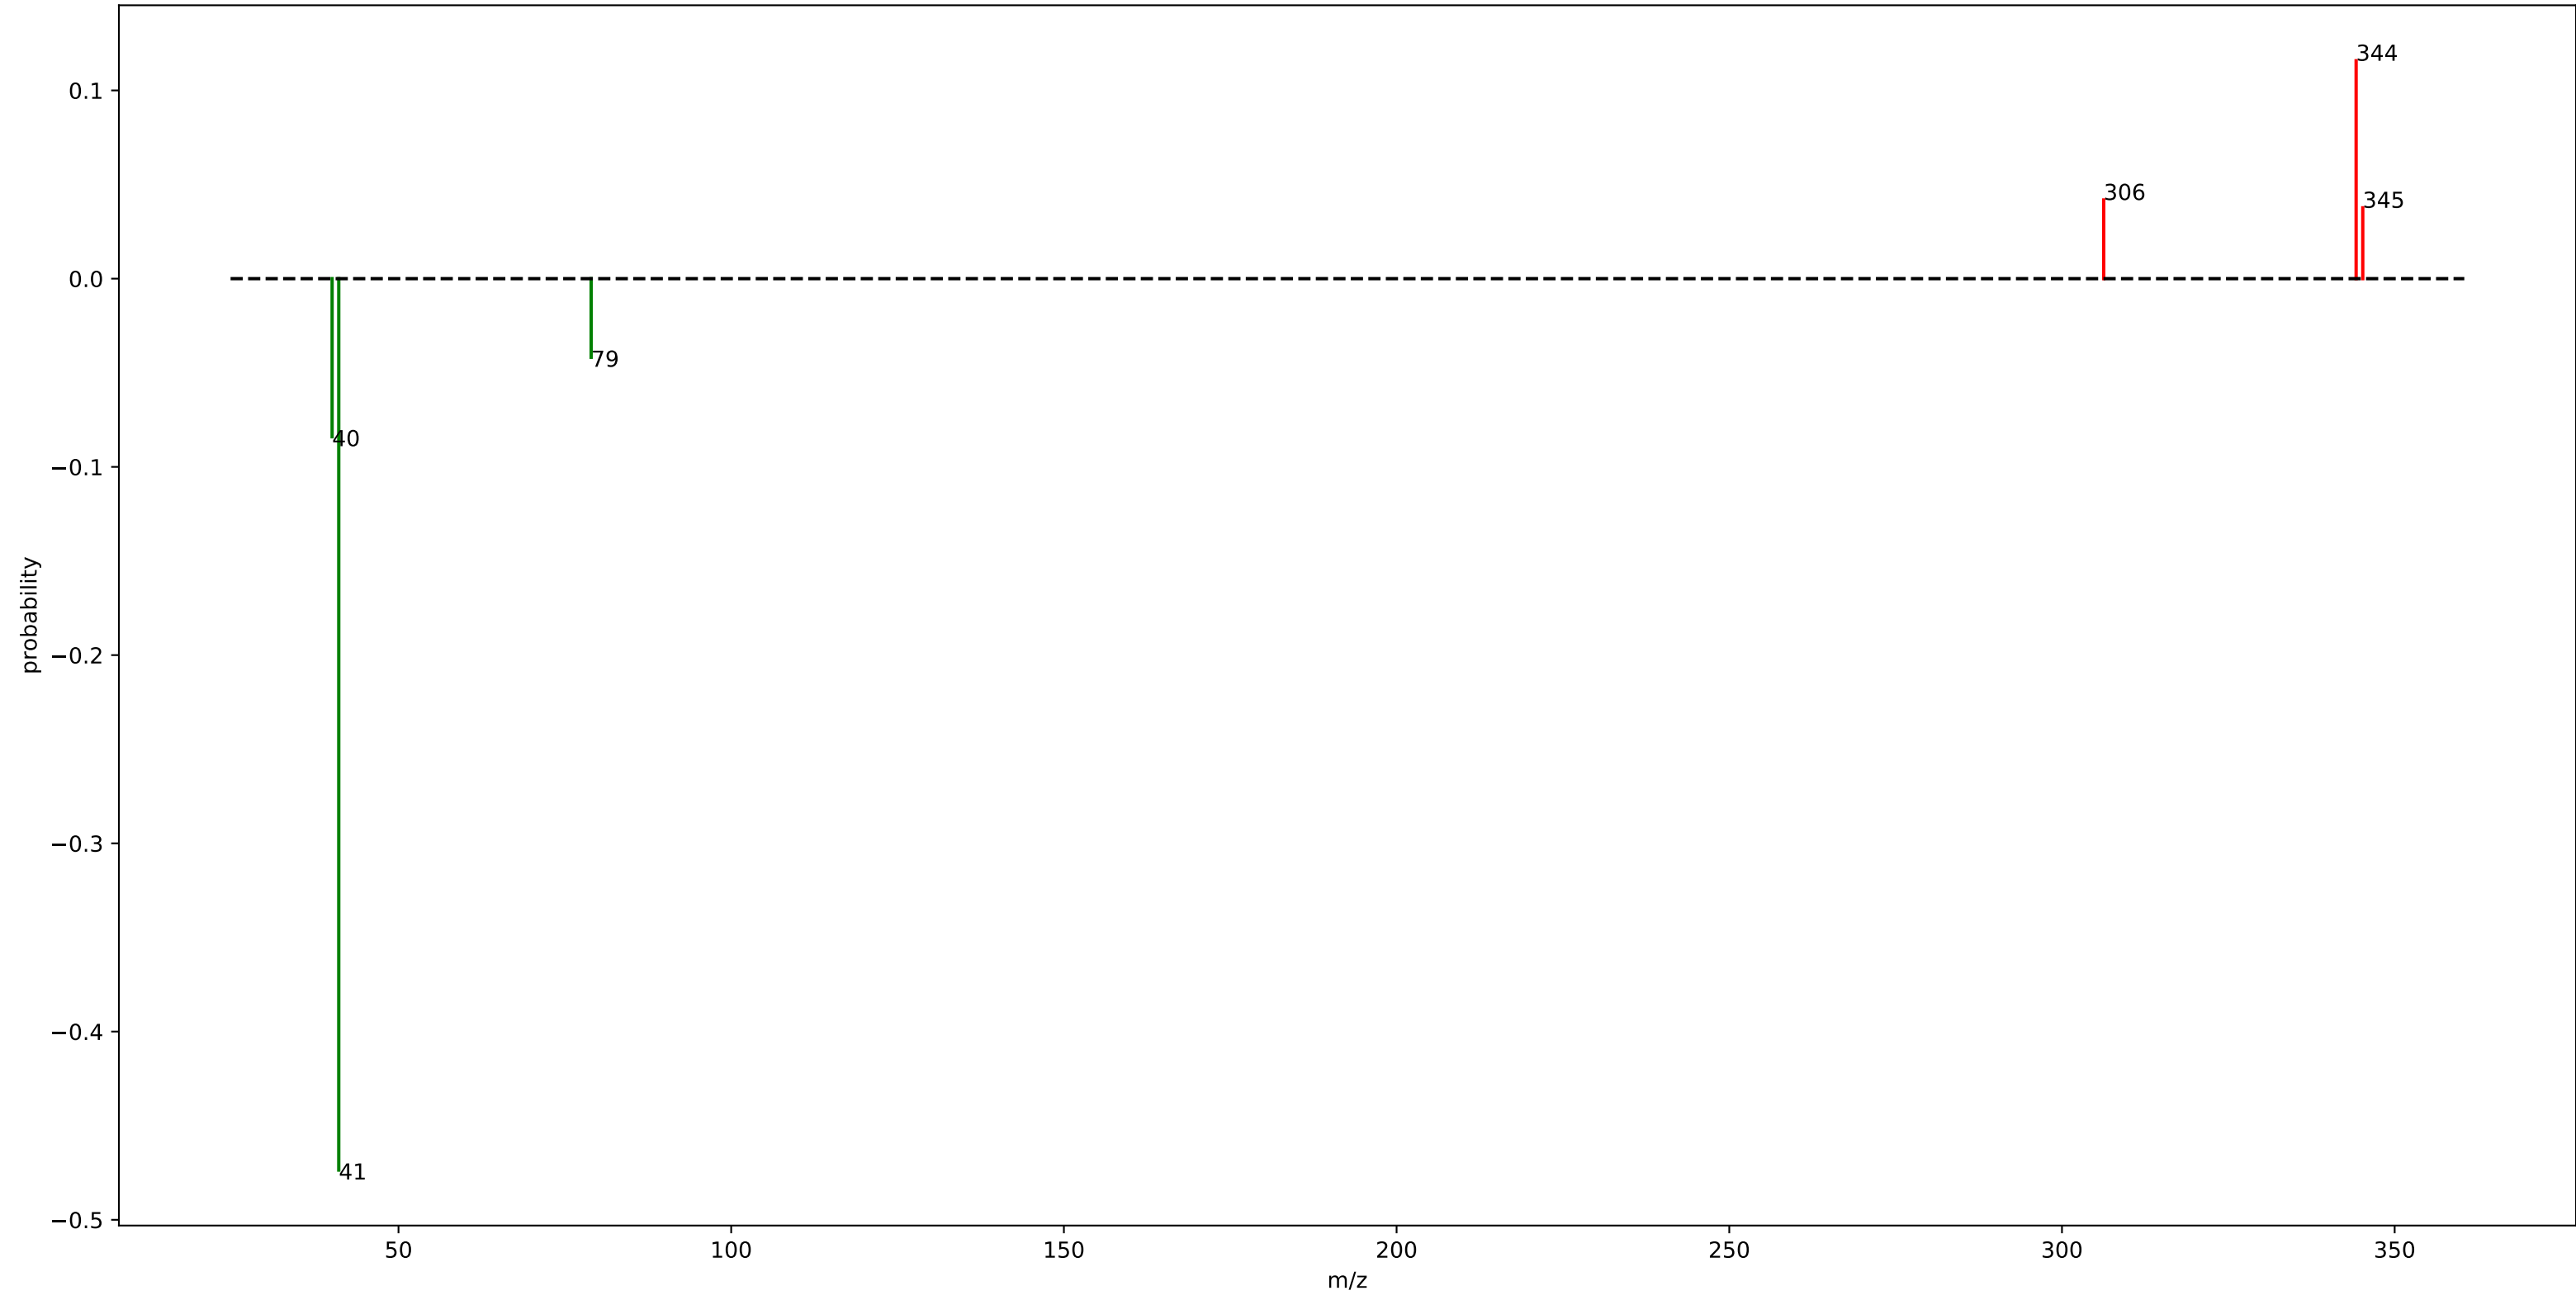

## motif\_497

|                   |        |
|-------------------|--------|
| loss_41.0225      | : 0.47 |
| fragment_344.2075 | : 0.12 |
| loss_40.0225      | : 0.08 |
| loss_78.9525      | : 0.04 |
| fragment_306.2775 | : 0.04 |
| fragment_345.2075 | : 0.04 |

urine\_mass2motif\_18.m2m

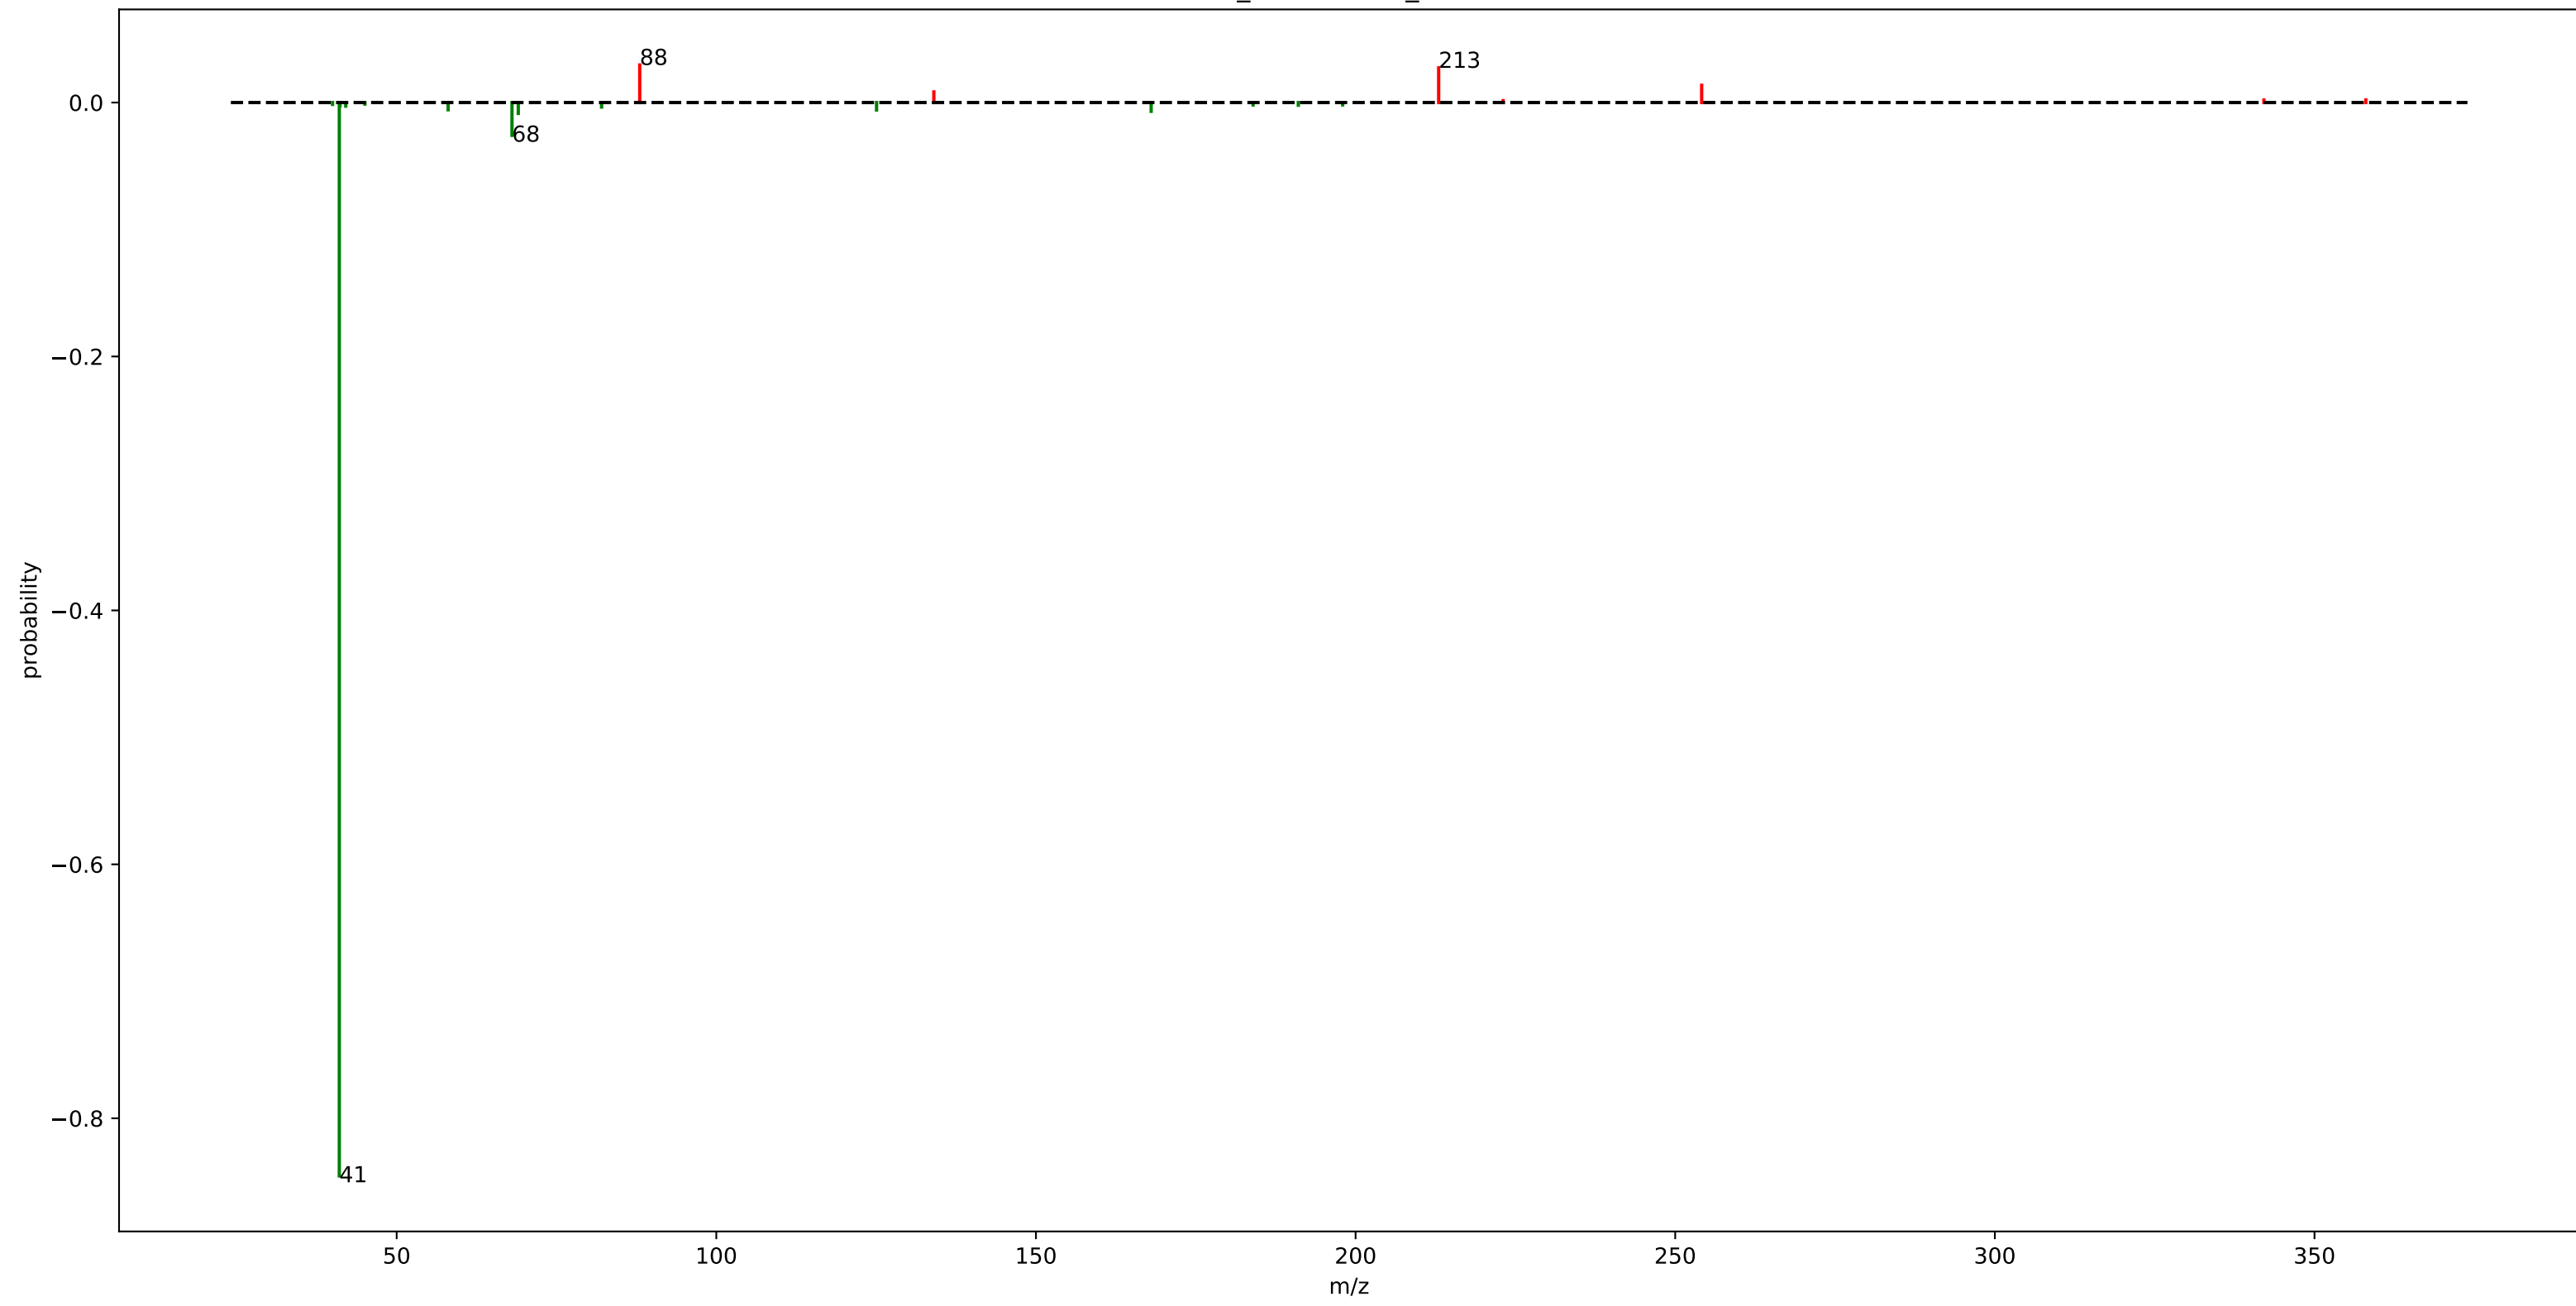

## urine\_mass2motif\_18.m2m

|                   |        |
|-------------------|--------|
| loss_41.0275      | : 0.85 |
| fragment_88.0225  | : 0.03 |
| fragment_212.9975 | : 0.03 |
| loss_68.0375      | : 0.03 |
| fragment_254.1375 | : 0.01 |
| loss_69.0225      | : 0.01 |
| fragment_134.0275 | : 0.01 |
| loss_168.0225     | : 0.01 |
| loss_125.0675     | : 0.01 |
| loss_58.0525      | : 0.01 |

motif\_495

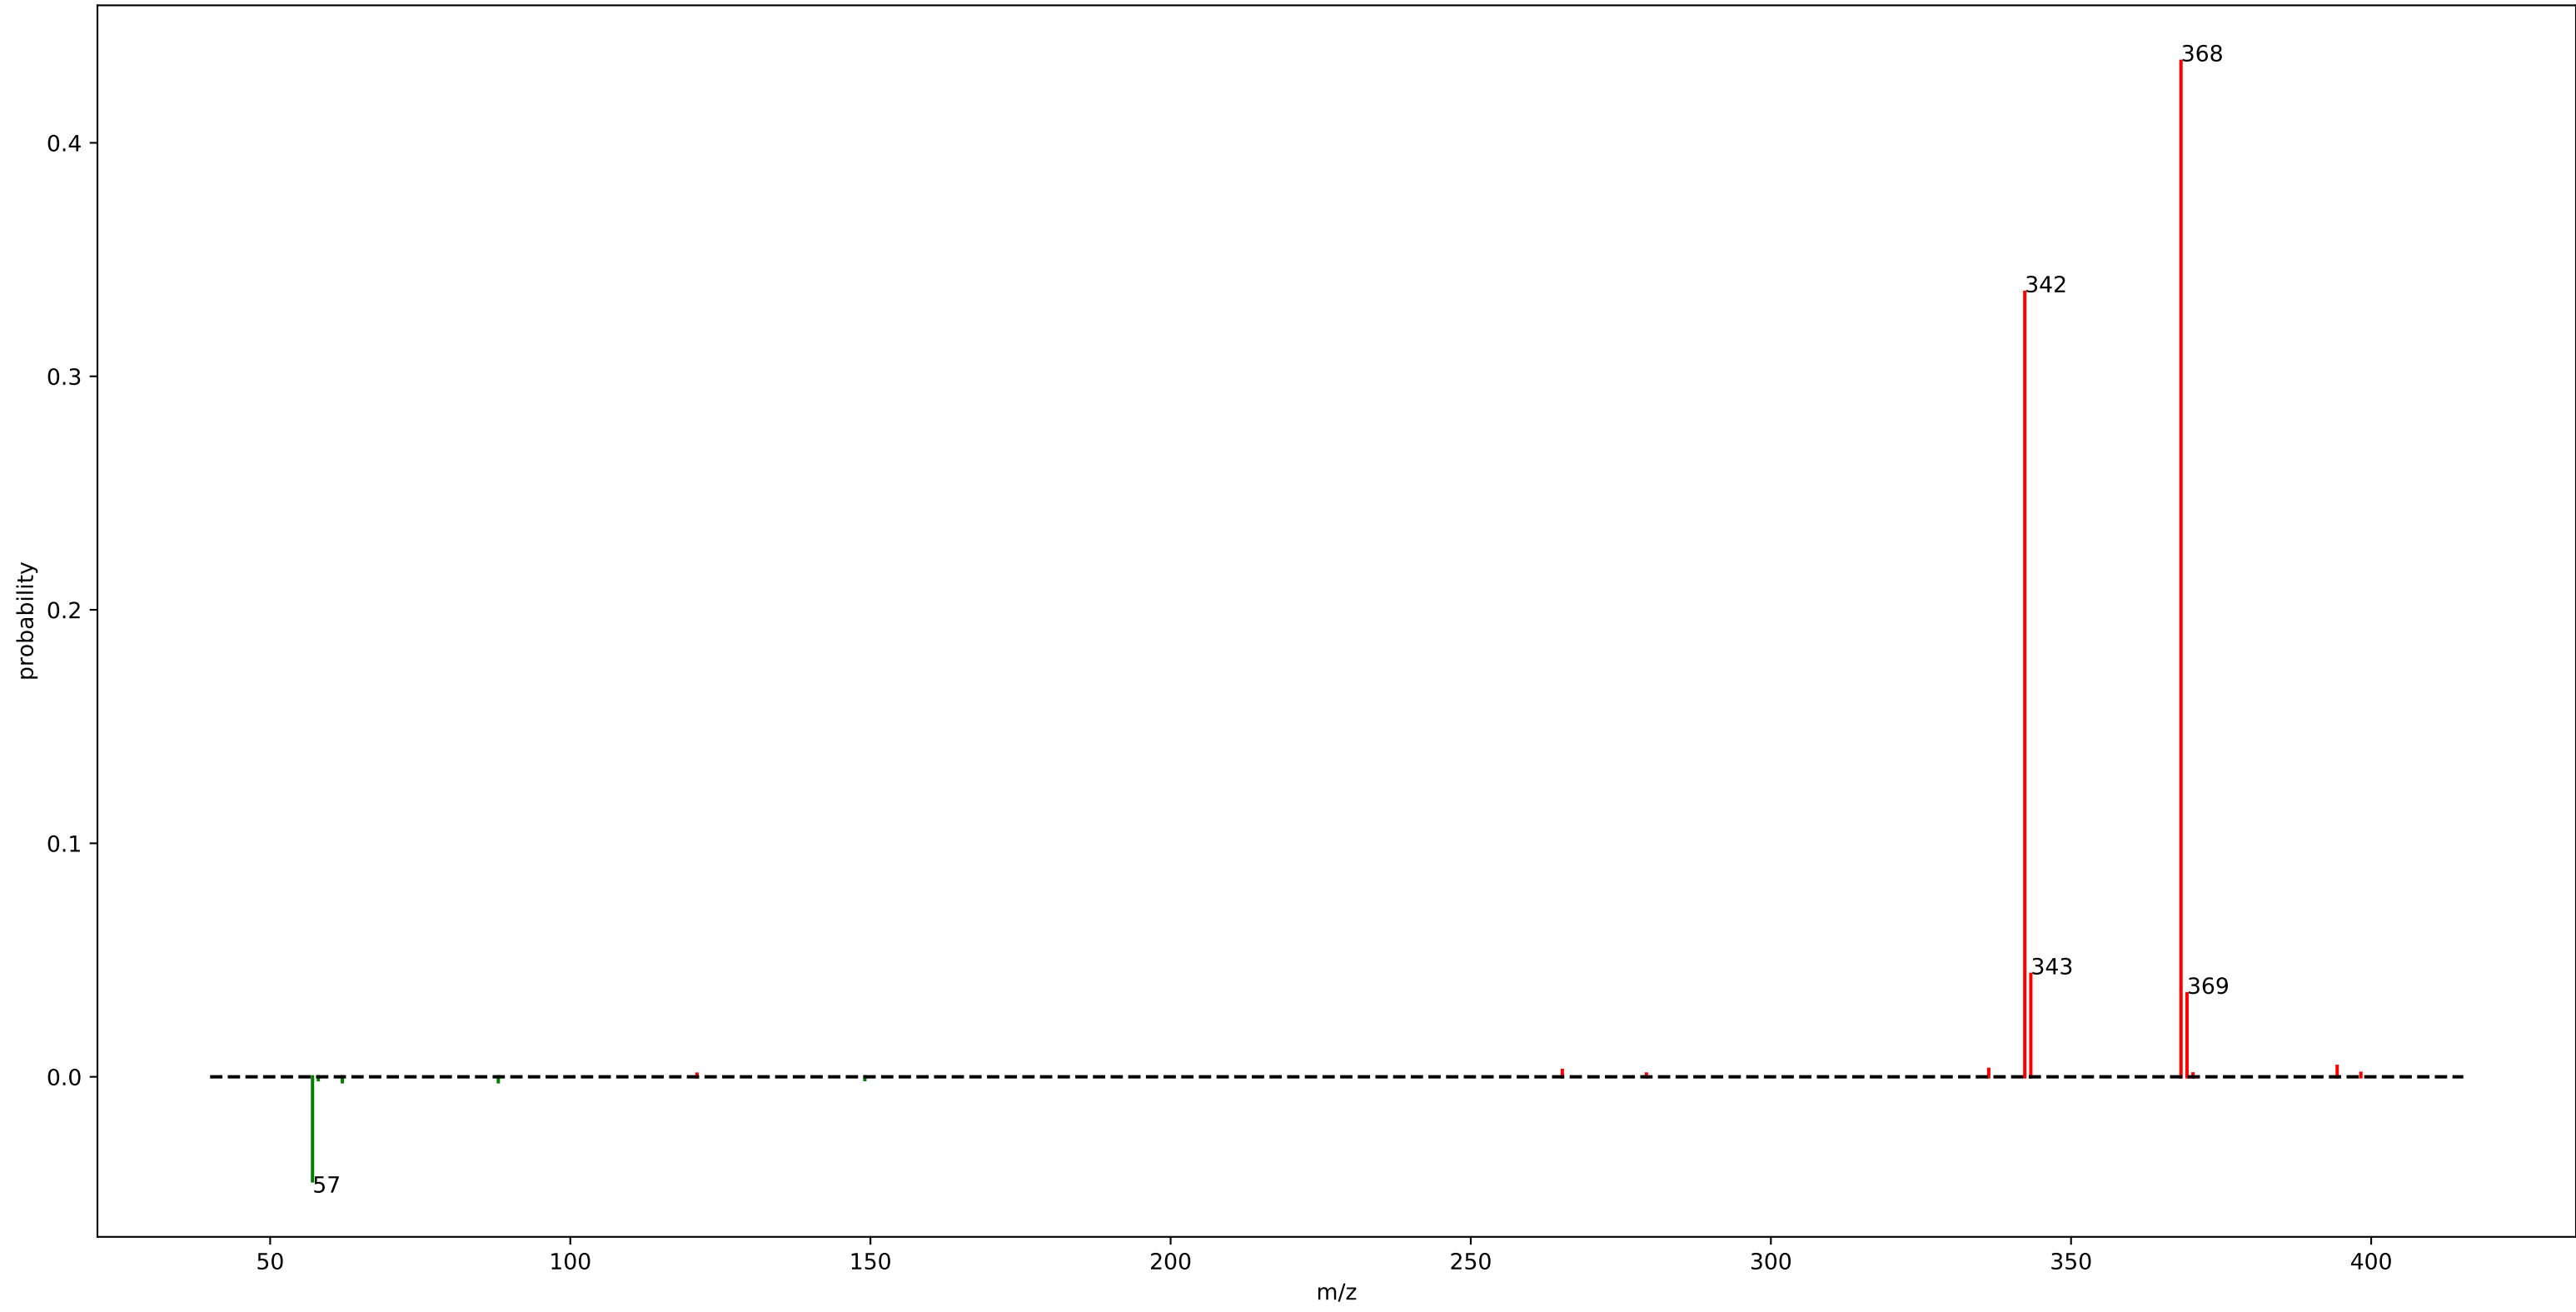

## motif\_495

|                   |        |
|-------------------|--------|
| fragment_368.3175 | : 0.43 |
| fragment_342.2975 | : 0.34 |
| loss_57.0575      | : 0.04 |
| fragment_343.3025 | : 0.04 |
| fragment_369.3175 | : 0.04 |



motif\_553

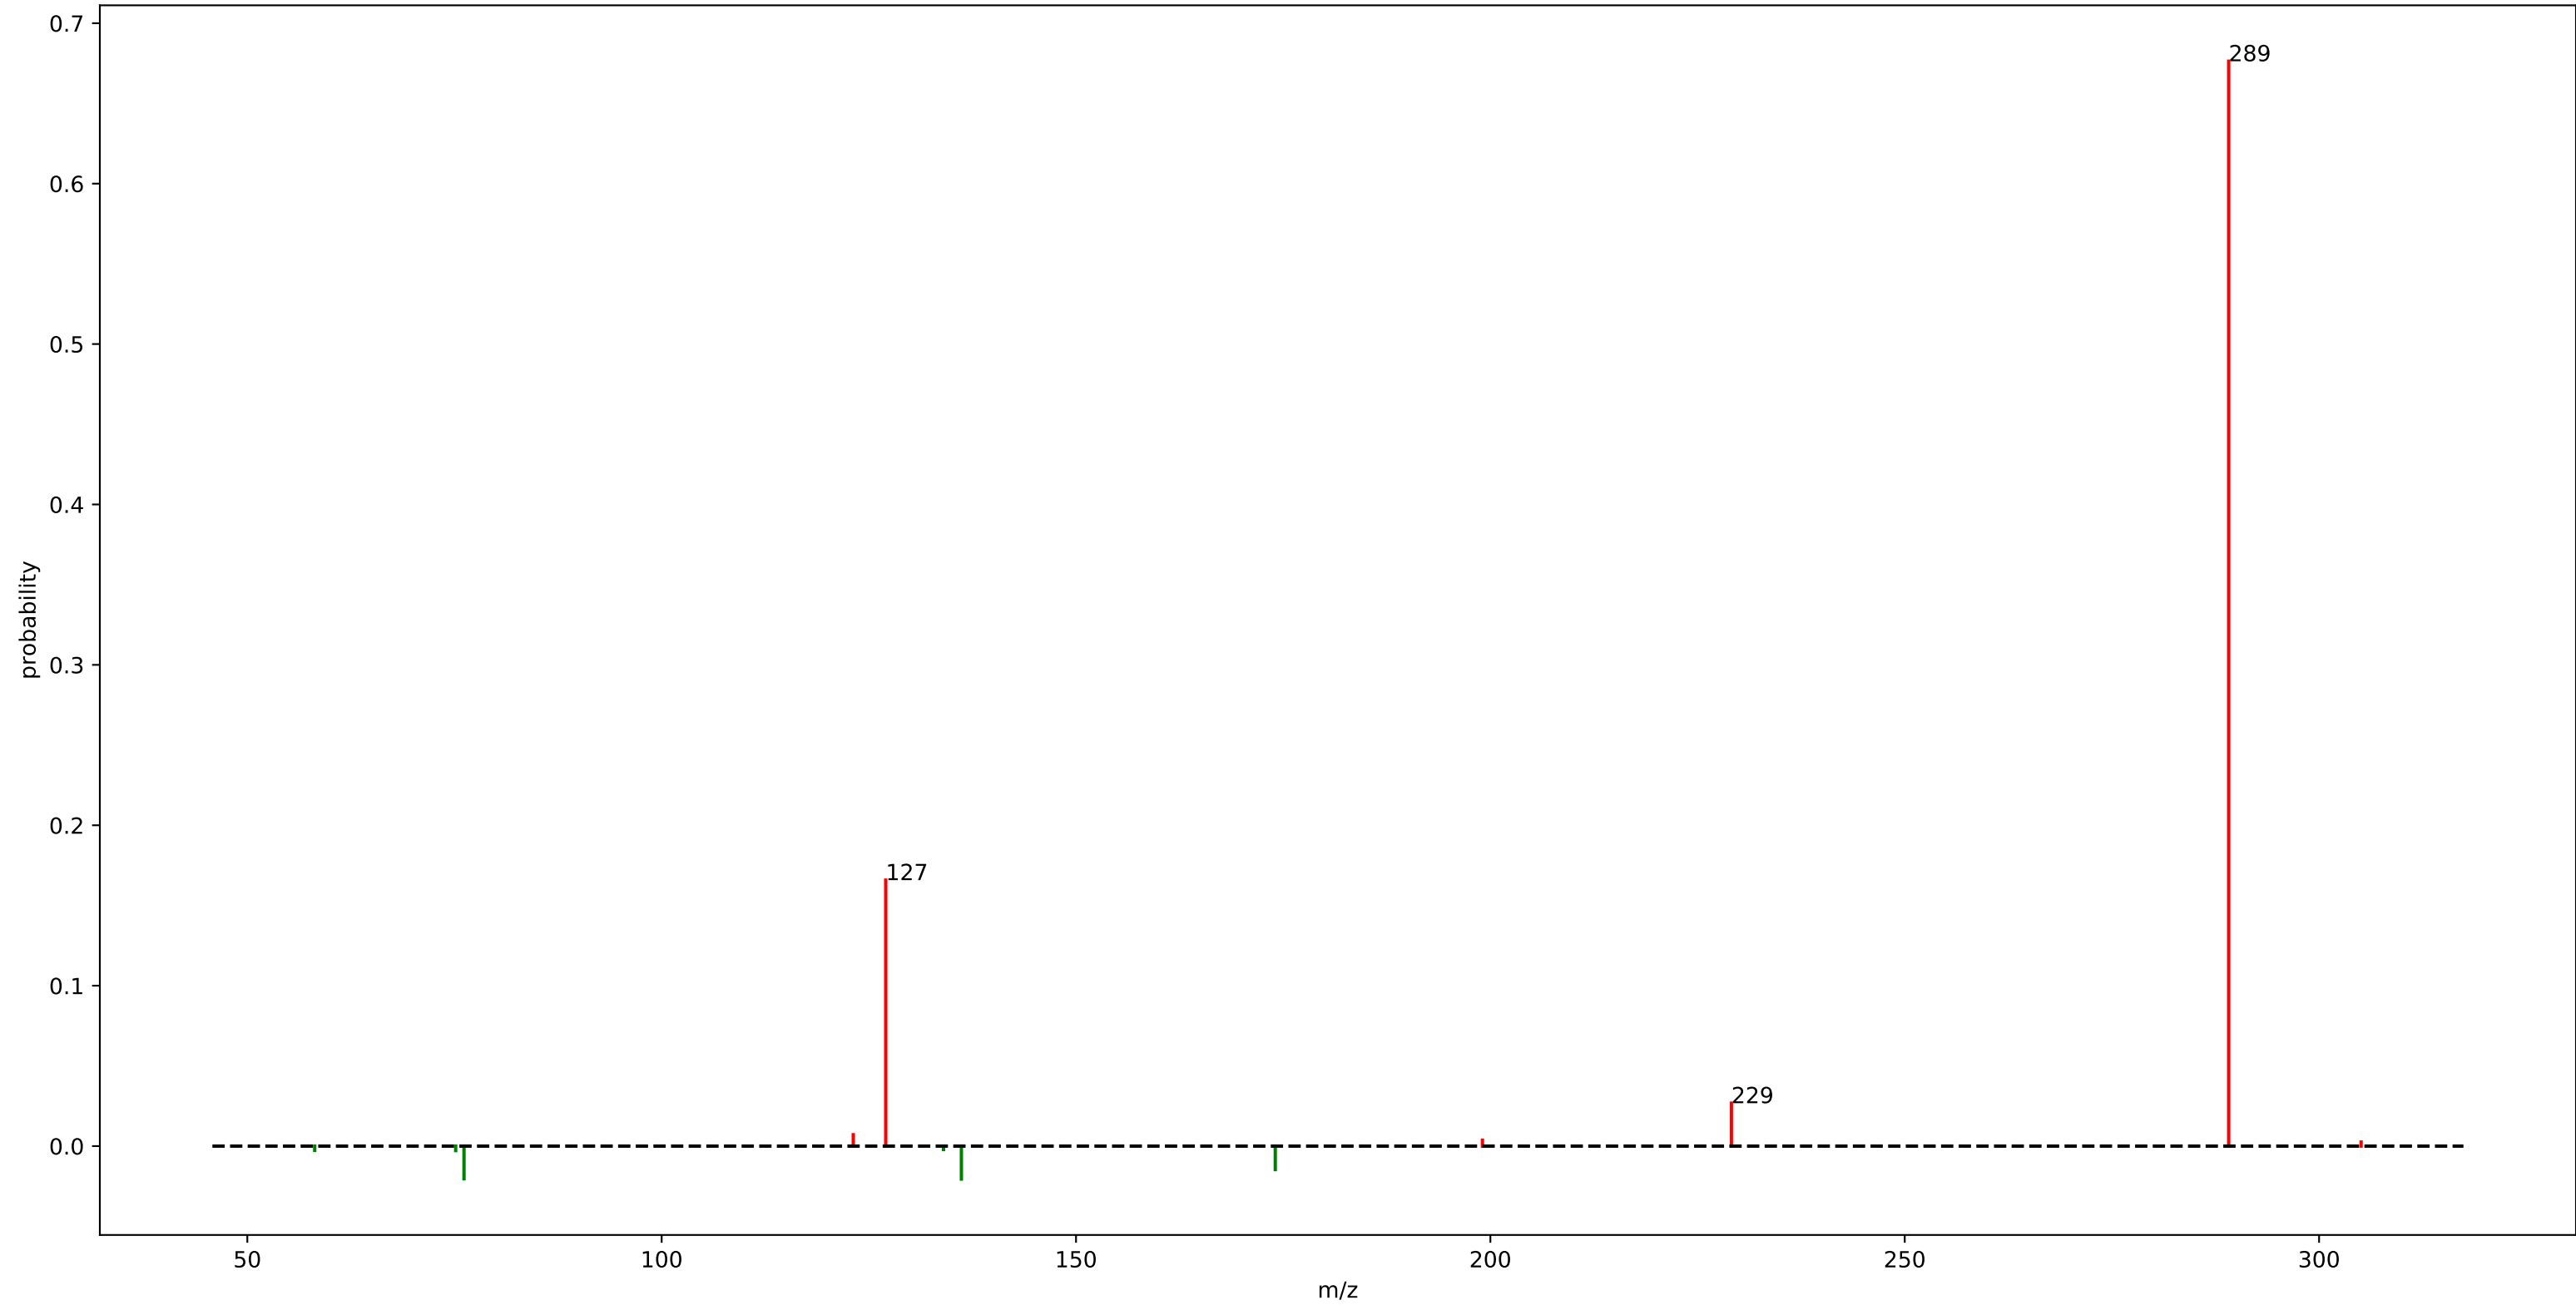

## motif\_553

|                   |        |
|-------------------|--------|
| fragment_289.0925 | : 0.68 |
| fragment_127.0375 | : 0.17 |
| fragment_229.0825 | : 0.03 |
| loss_136.1675     | : 0.02 |
| loss_76.1475      | : 0.02 |
| loss_174.0425     | : 0.01 |
| fragment_123.1175 | : 0.01 |

motif\_552

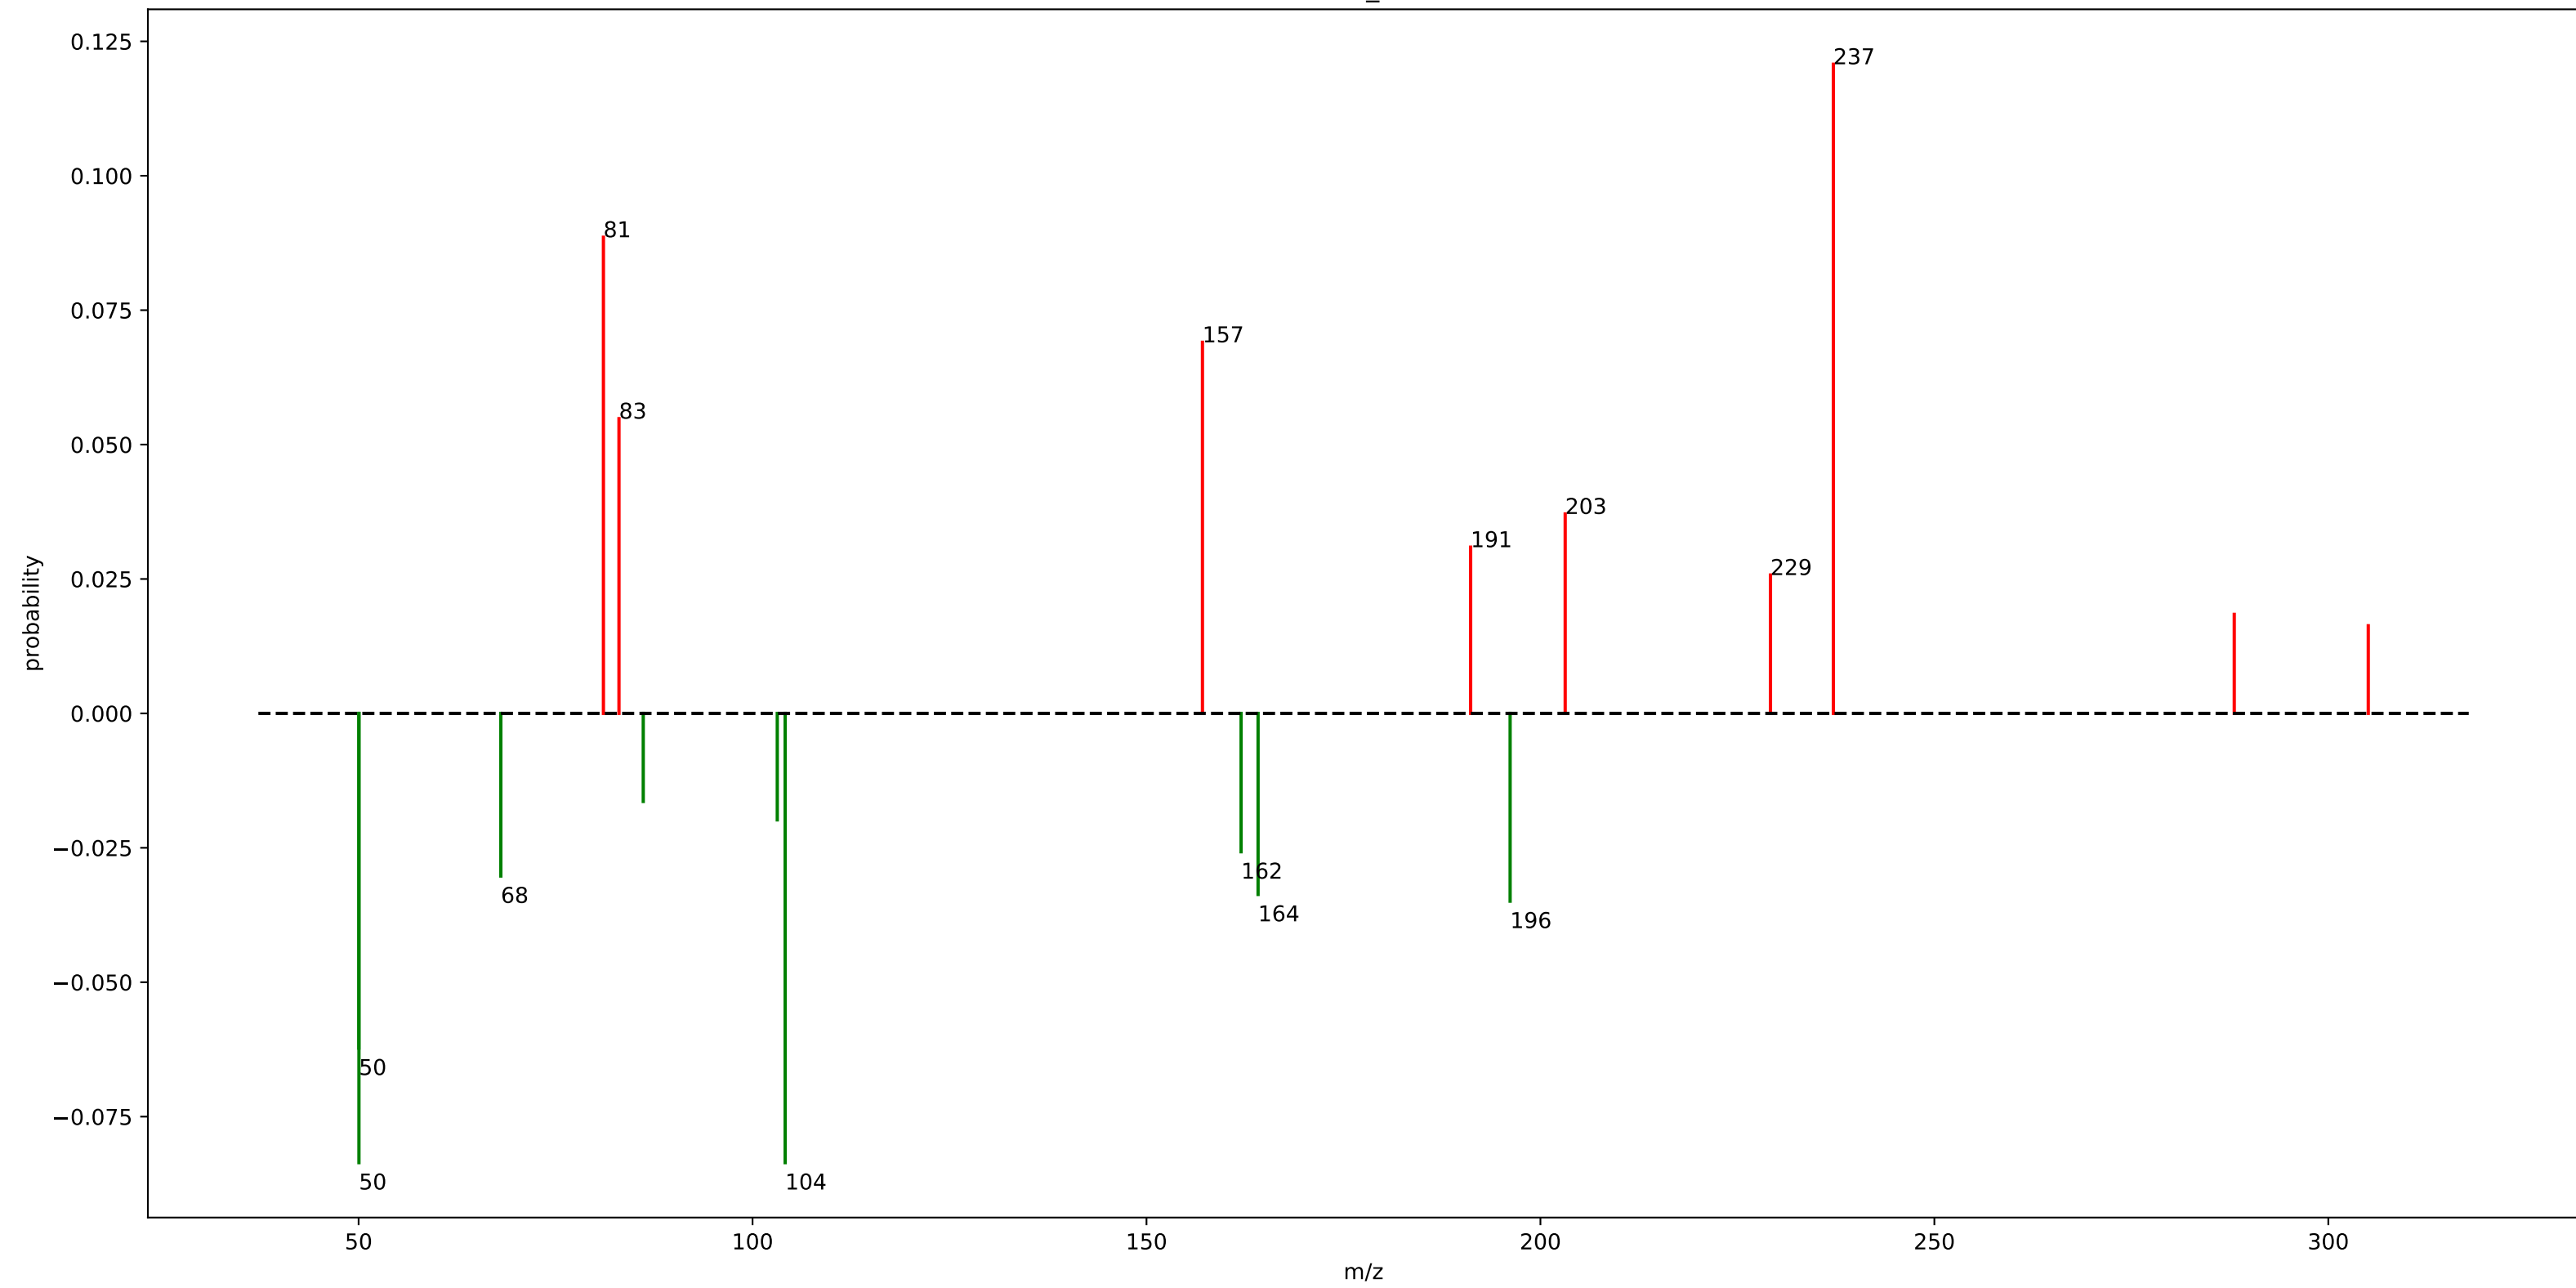

## motif\_552

|                   |        |
|-------------------|--------|
| fragment_237.1825 | : 0.12 |
| fragment_81.0725  | : 0.09 |
| loss_104.1375     | : 0.08 |
| loss_50.0425      | : 0.08 |
| fragment_157.1025 | : 0.07 |
| loss_50.0325      | : 0.06 |
| fragment_83.0475  | : 0.05 |
| fragment_203.1425 | : 0.04 |
| loss_196.1525     | : 0.03 |
| loss_164.1625     | : 0.03 |
| fragment_191.1425 | : 0.03 |
| loss_68.0525      | : 0.03 |
| loss_162.0075     | : 0.03 |
| fragment_229.1975 | : 0.03 |
| loss_103.1375     | : 0.02 |
| fragment_288.0625 | : 0.02 |
| loss_86.1275      | : 0.02 |
| fragment_305.0725 | : 0.02 |

motif\_498

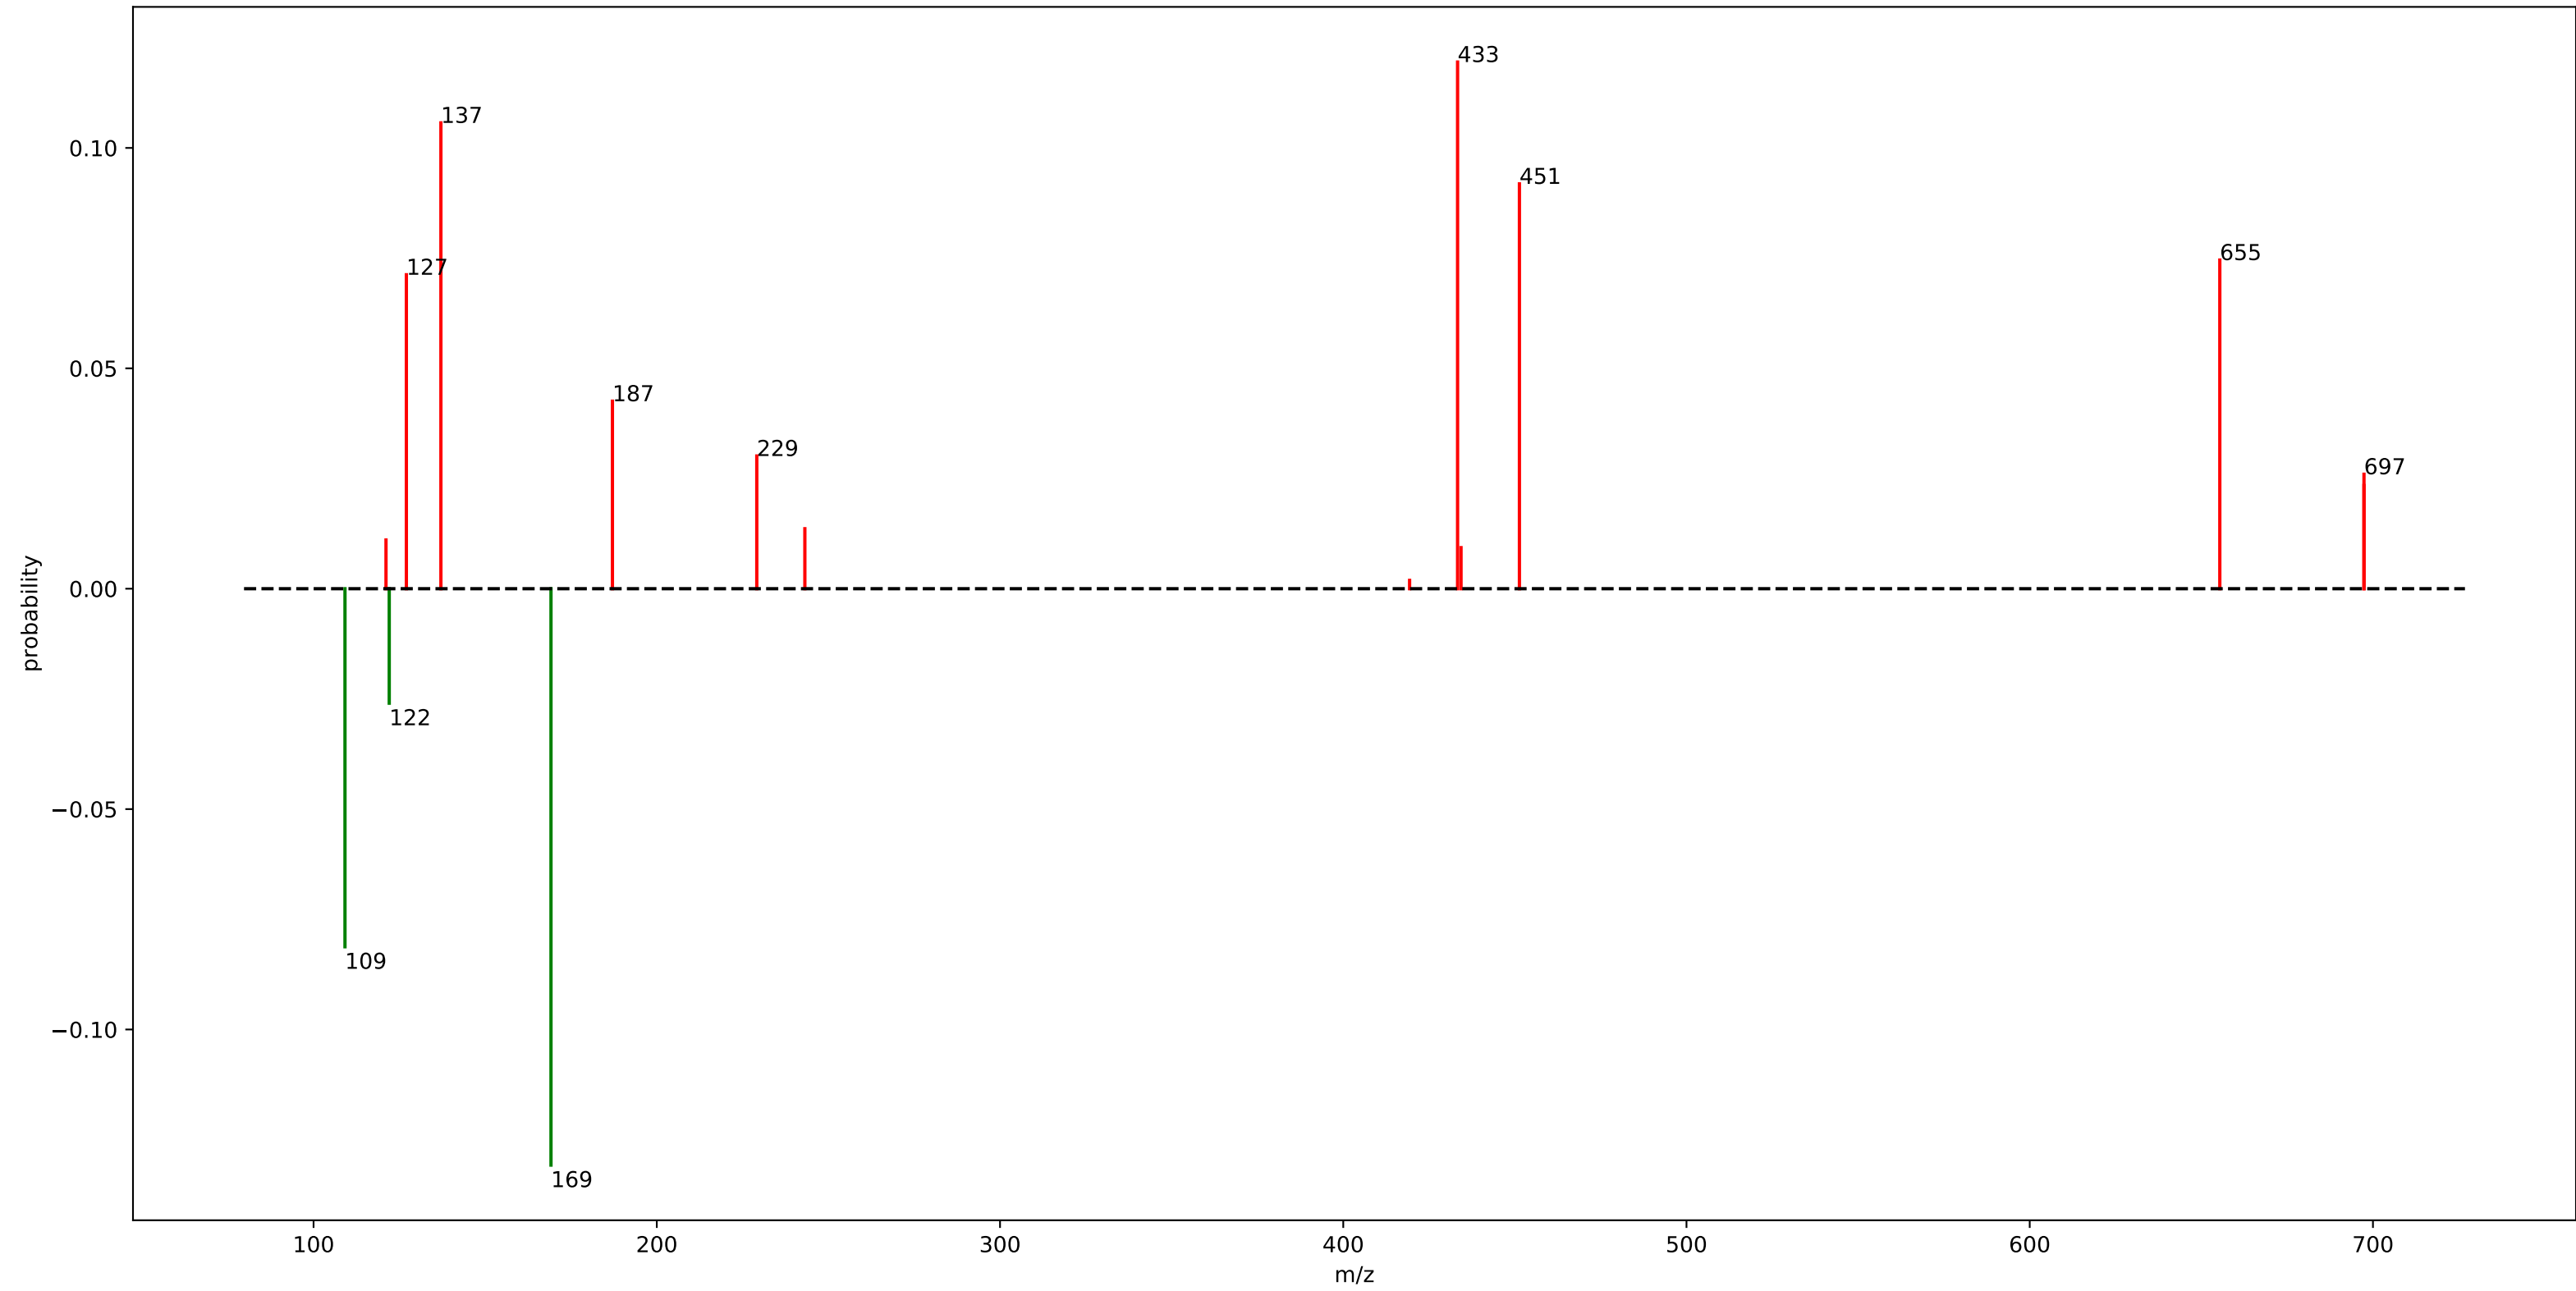

## motif\_498

|                   |        |
|-------------------|--------|
| loss_169.1725     | : 0.13 |
| fragment_433.3075 | : 0.12 |
| fragment_137.0975 | : 0.11 |
| fragment_451.3225 | : 0.09 |
| loss_109.1525     | : 0.08 |
| fragment_655.3825 | : 0.07 |
| fragment_127.0375 | : 0.07 |
| fragment_187.0725 | : 0.04 |
| fragment_229.1325 | : 0.03 |
| fragment_697.3875 | : 0.03 |
| loss_122.0475     | : 0.03 |
| fragment_697.3925 | : 0.02 |
| fragment_243.1375 | : 0.01 |
| fragment_121.1025 | : 0.01 |
| fragment_434.3125 | : 0.01 |

motif\_499

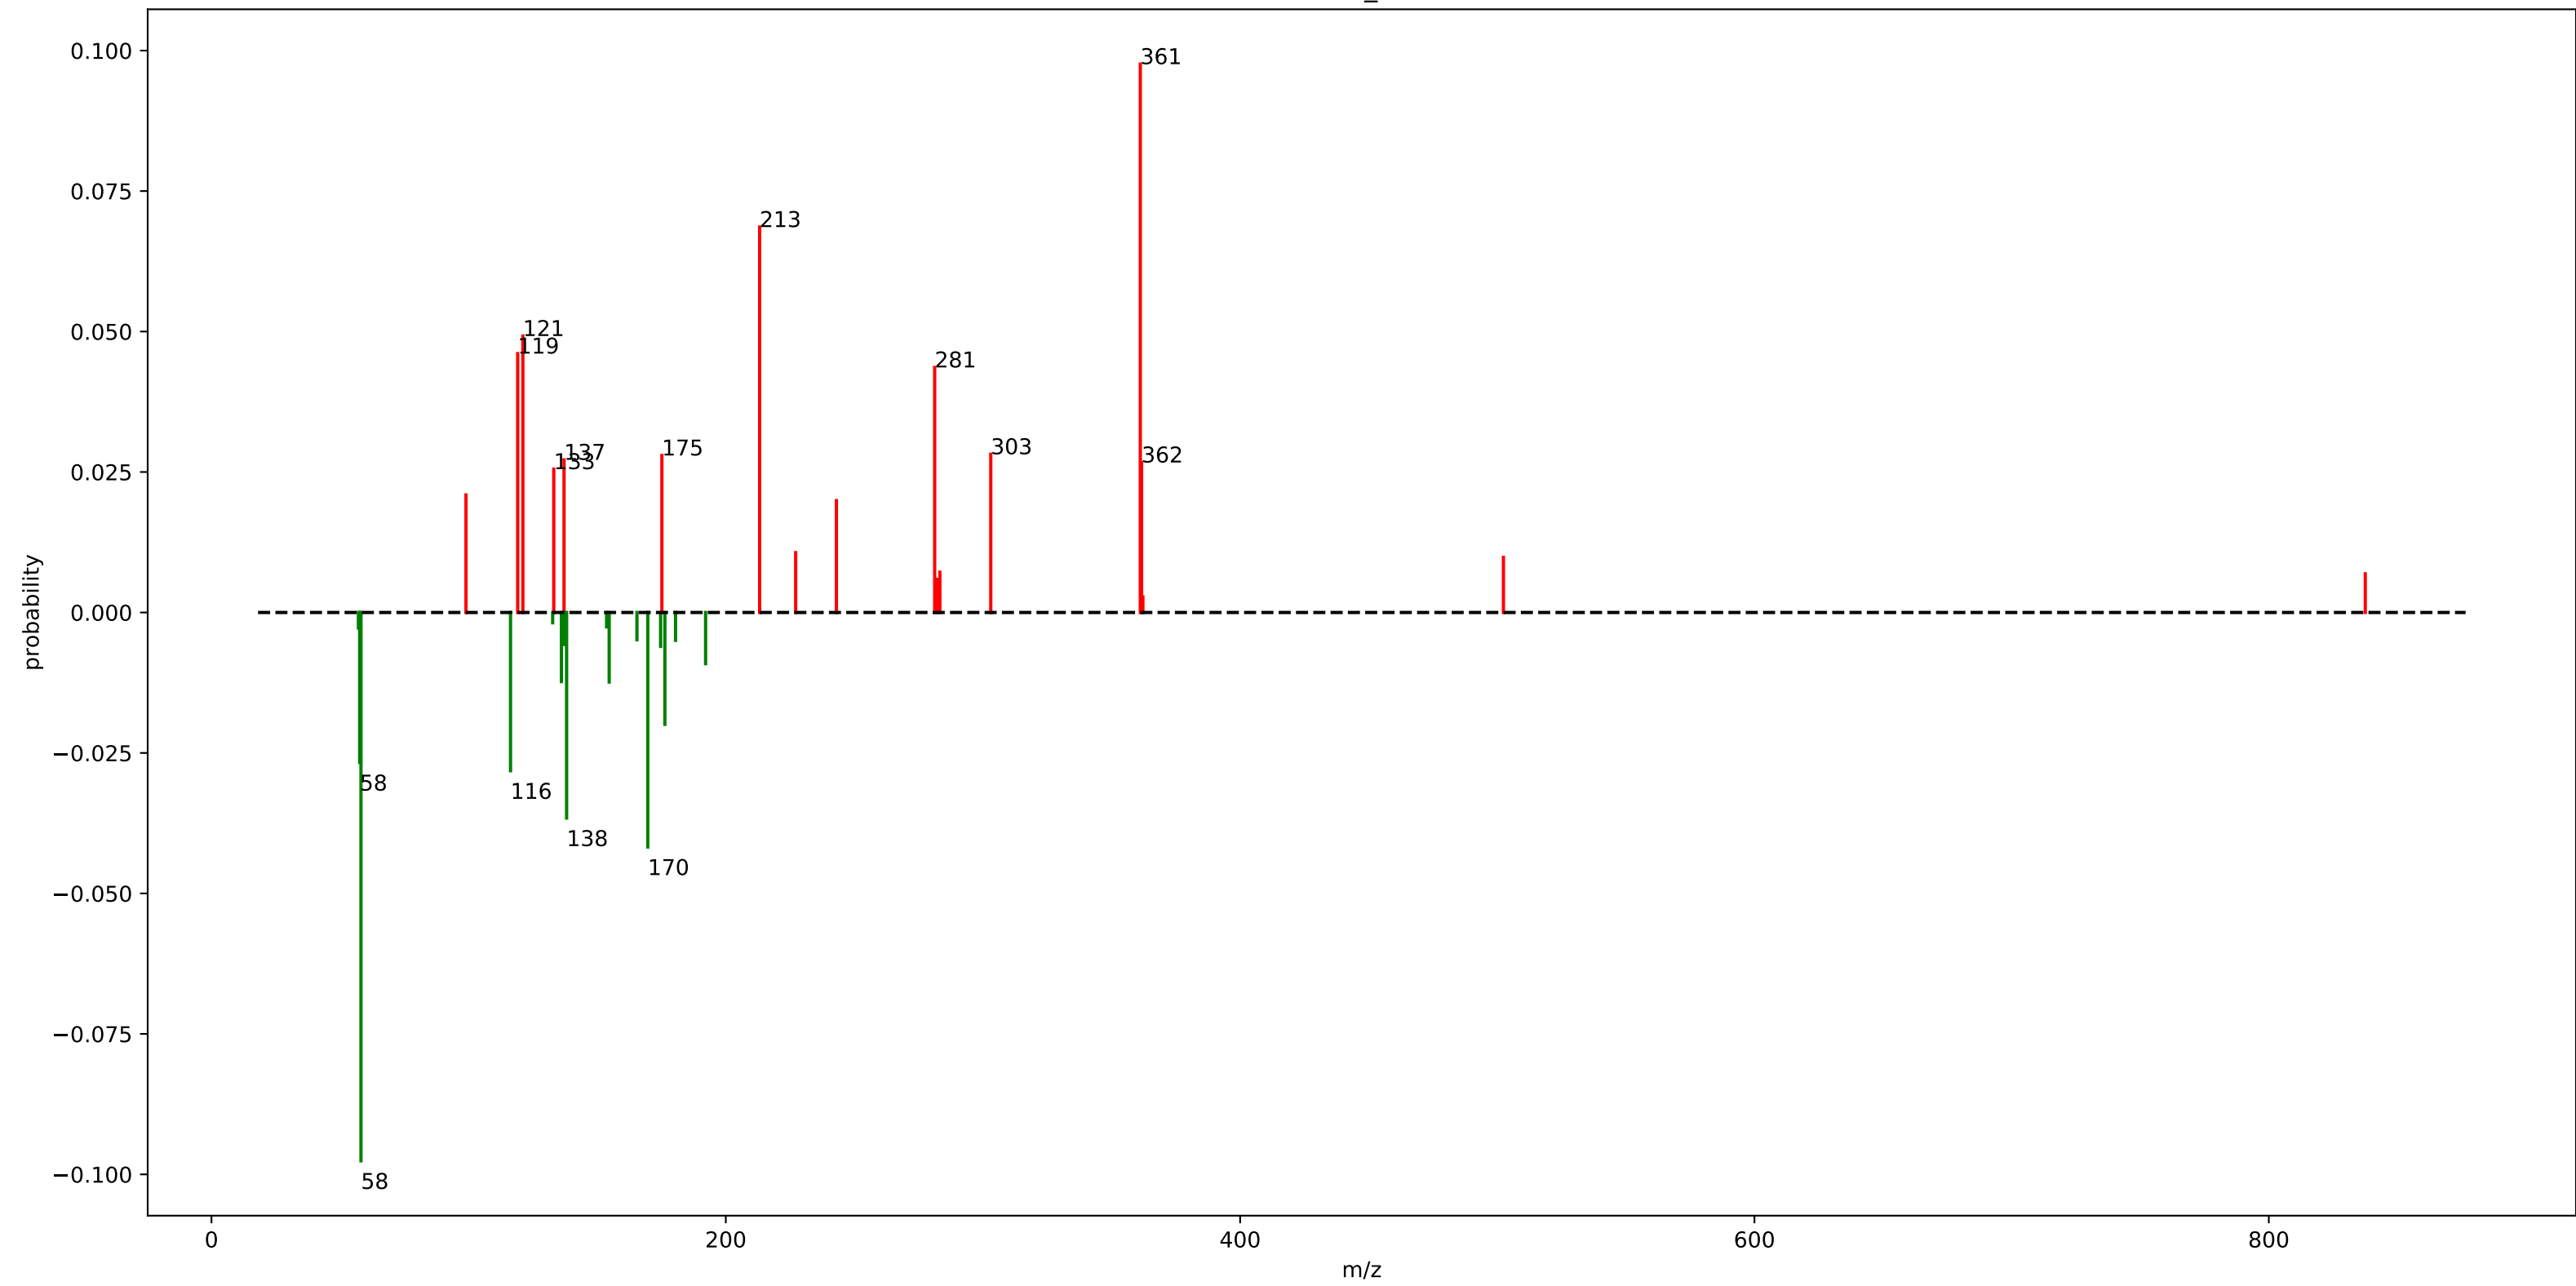

## motif\_499

|                   |        |                   |        |
|-------------------|--------|-------------------|--------|
| loss_58.1425      | : 0.10 | fragment_227.1775 | : 0.01 |
| fragment_361.1825 | : 0.10 | fragment_502.3875 | : 0.01 |
| fragment_213.1625 | : 0.07 | loss_192.1475     | : 0.01 |
| fragment_121.0975 | : 0.05 | fragment_283.2425 | : 0.01 |
| fragment_119.0825 | : 0.05 | fragment_837.5125 | : 0.01 |
| fragment_281.2275 | : 0.04 | loss_174.6525     | : 0.01 |
| loss_169.6625     | : 0.04 | fragment_282.2325 | : 0.01 |
| loss_138.1025     | : 0.04 | loss_137.0975     | : 0.01 |
| loss_116.2925     | : 0.03 |                   |        |
| fragment_303.0375 | : 0.03 |                   |        |
| fragment_175.1475 | : 0.03 |                   |        |
| fragment_137.0975 | : 0.03 |                   |        |
| loss_57.6425      | : 0.03 |                   |        |
| fragment_361.6875 | : 0.03 |                   |        |
| fragment_133.1025 | : 0.03 |                   |        |
| fragment_98.9725  | : 0.02 |                   |        |
| loss_176.3125     | : 0.02 |                   |        |
| fragment_243.0175 | : 0.02 |                   |        |
| loss_154.6575     | : 0.01 |                   |        |
| loss_136.0875     | : 0.01 |                   |        |



motif\_557

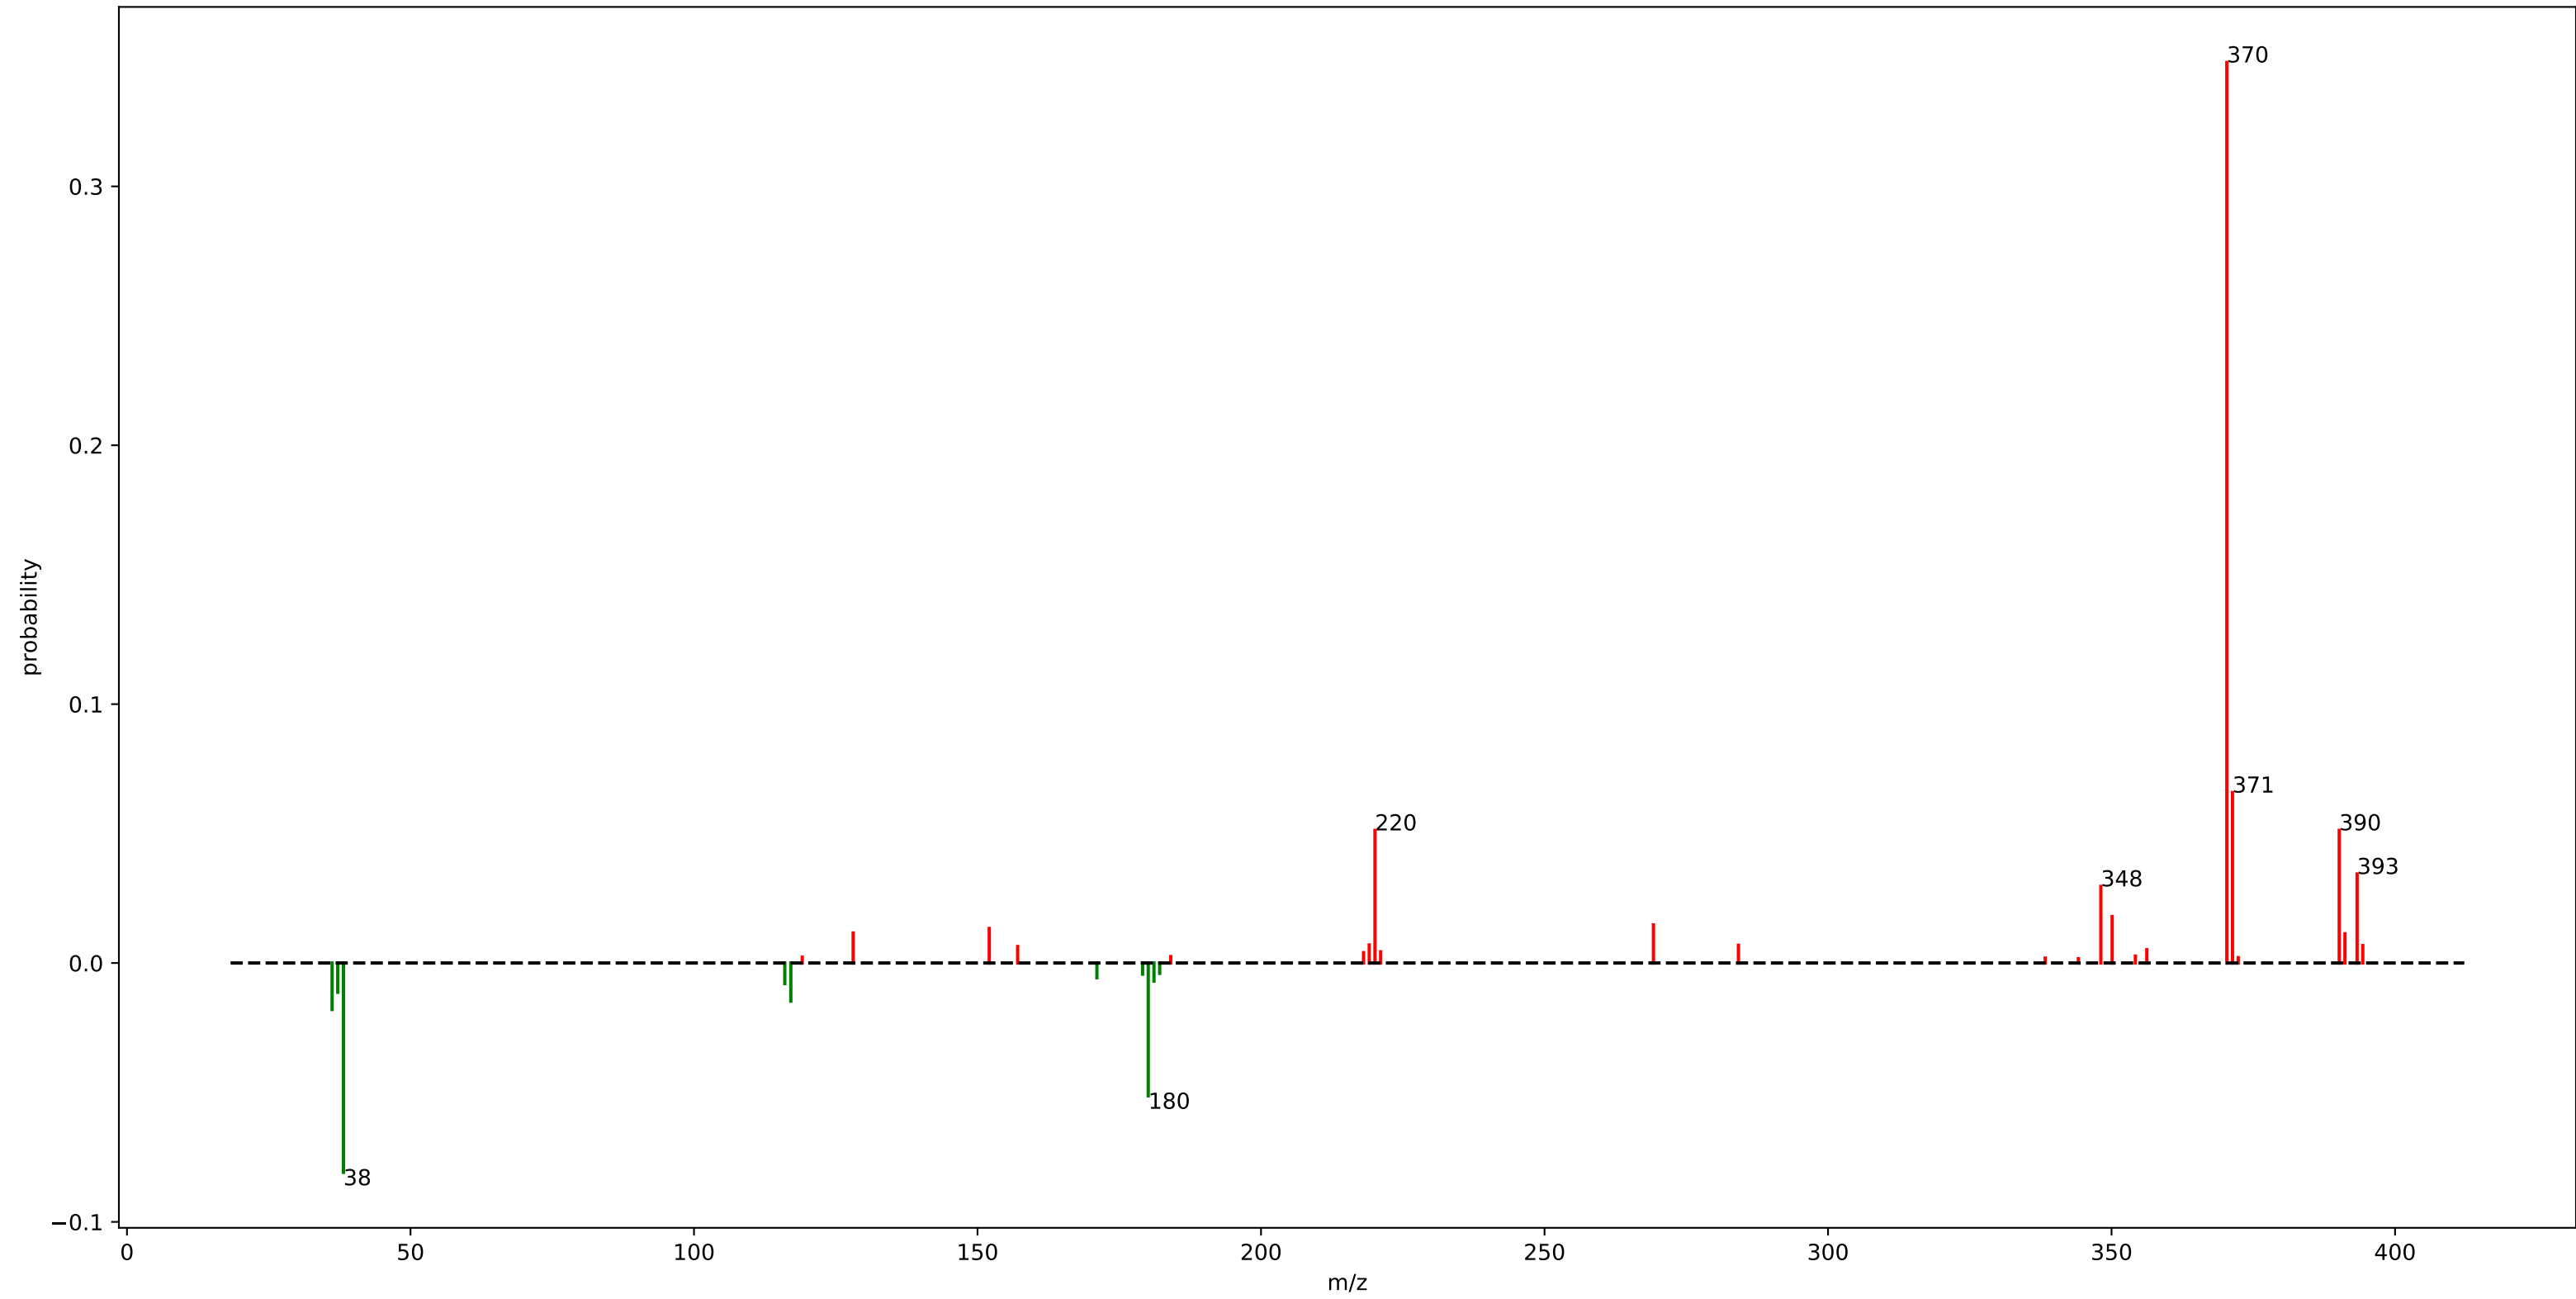

## motif\_557

|                   |        |                   |        |
|-------------------|--------|-------------------|--------|
| fragment_370.3325 | : 0.35 | fragment_394.3075 | : 0.01 |
| loss_38.1775      | : 0.08 | fragment_157.0825 | : 0.01 |
| fragment_371.3325 | : 0.07 | loss_171.0575     | : 0.01 |
| loss_180.1125     | : 0.05 | fragment_356.2225 | : 0.01 |
| fragment_390.1575 | : 0.05 |                   |        |
| fragment_220.0975 | : 0.05 |                   |        |
| fragment_393.3075 | : 0.03 |                   |        |
| fragment_348.1125 | : 0.03 |                   |        |
| fragment_350.1075 | : 0.02 |                   |        |
| loss_36.1775      | : 0.02 |                   |        |
| loss_117.0775     | : 0.01 |                   |        |
| fragment_269.2075 | : 0.01 |                   |        |
| fragment_152.0725 | : 0.01 |                   |        |
| fragment_128.0675 | : 0.01 |                   |        |
| fragment_391.1625 | : 0.01 |                   |        |
| loss_37.1725      | : 0.01 |                   |        |
| loss_116.0125     | : 0.01 |                   |        |
| fragment_219.0875 | : 0.01 |                   |        |
| loss_181.1225     | : 0.01 |                   |        |
| fragment_284.1975 | : 0.01 |                   |        |

motif\_556

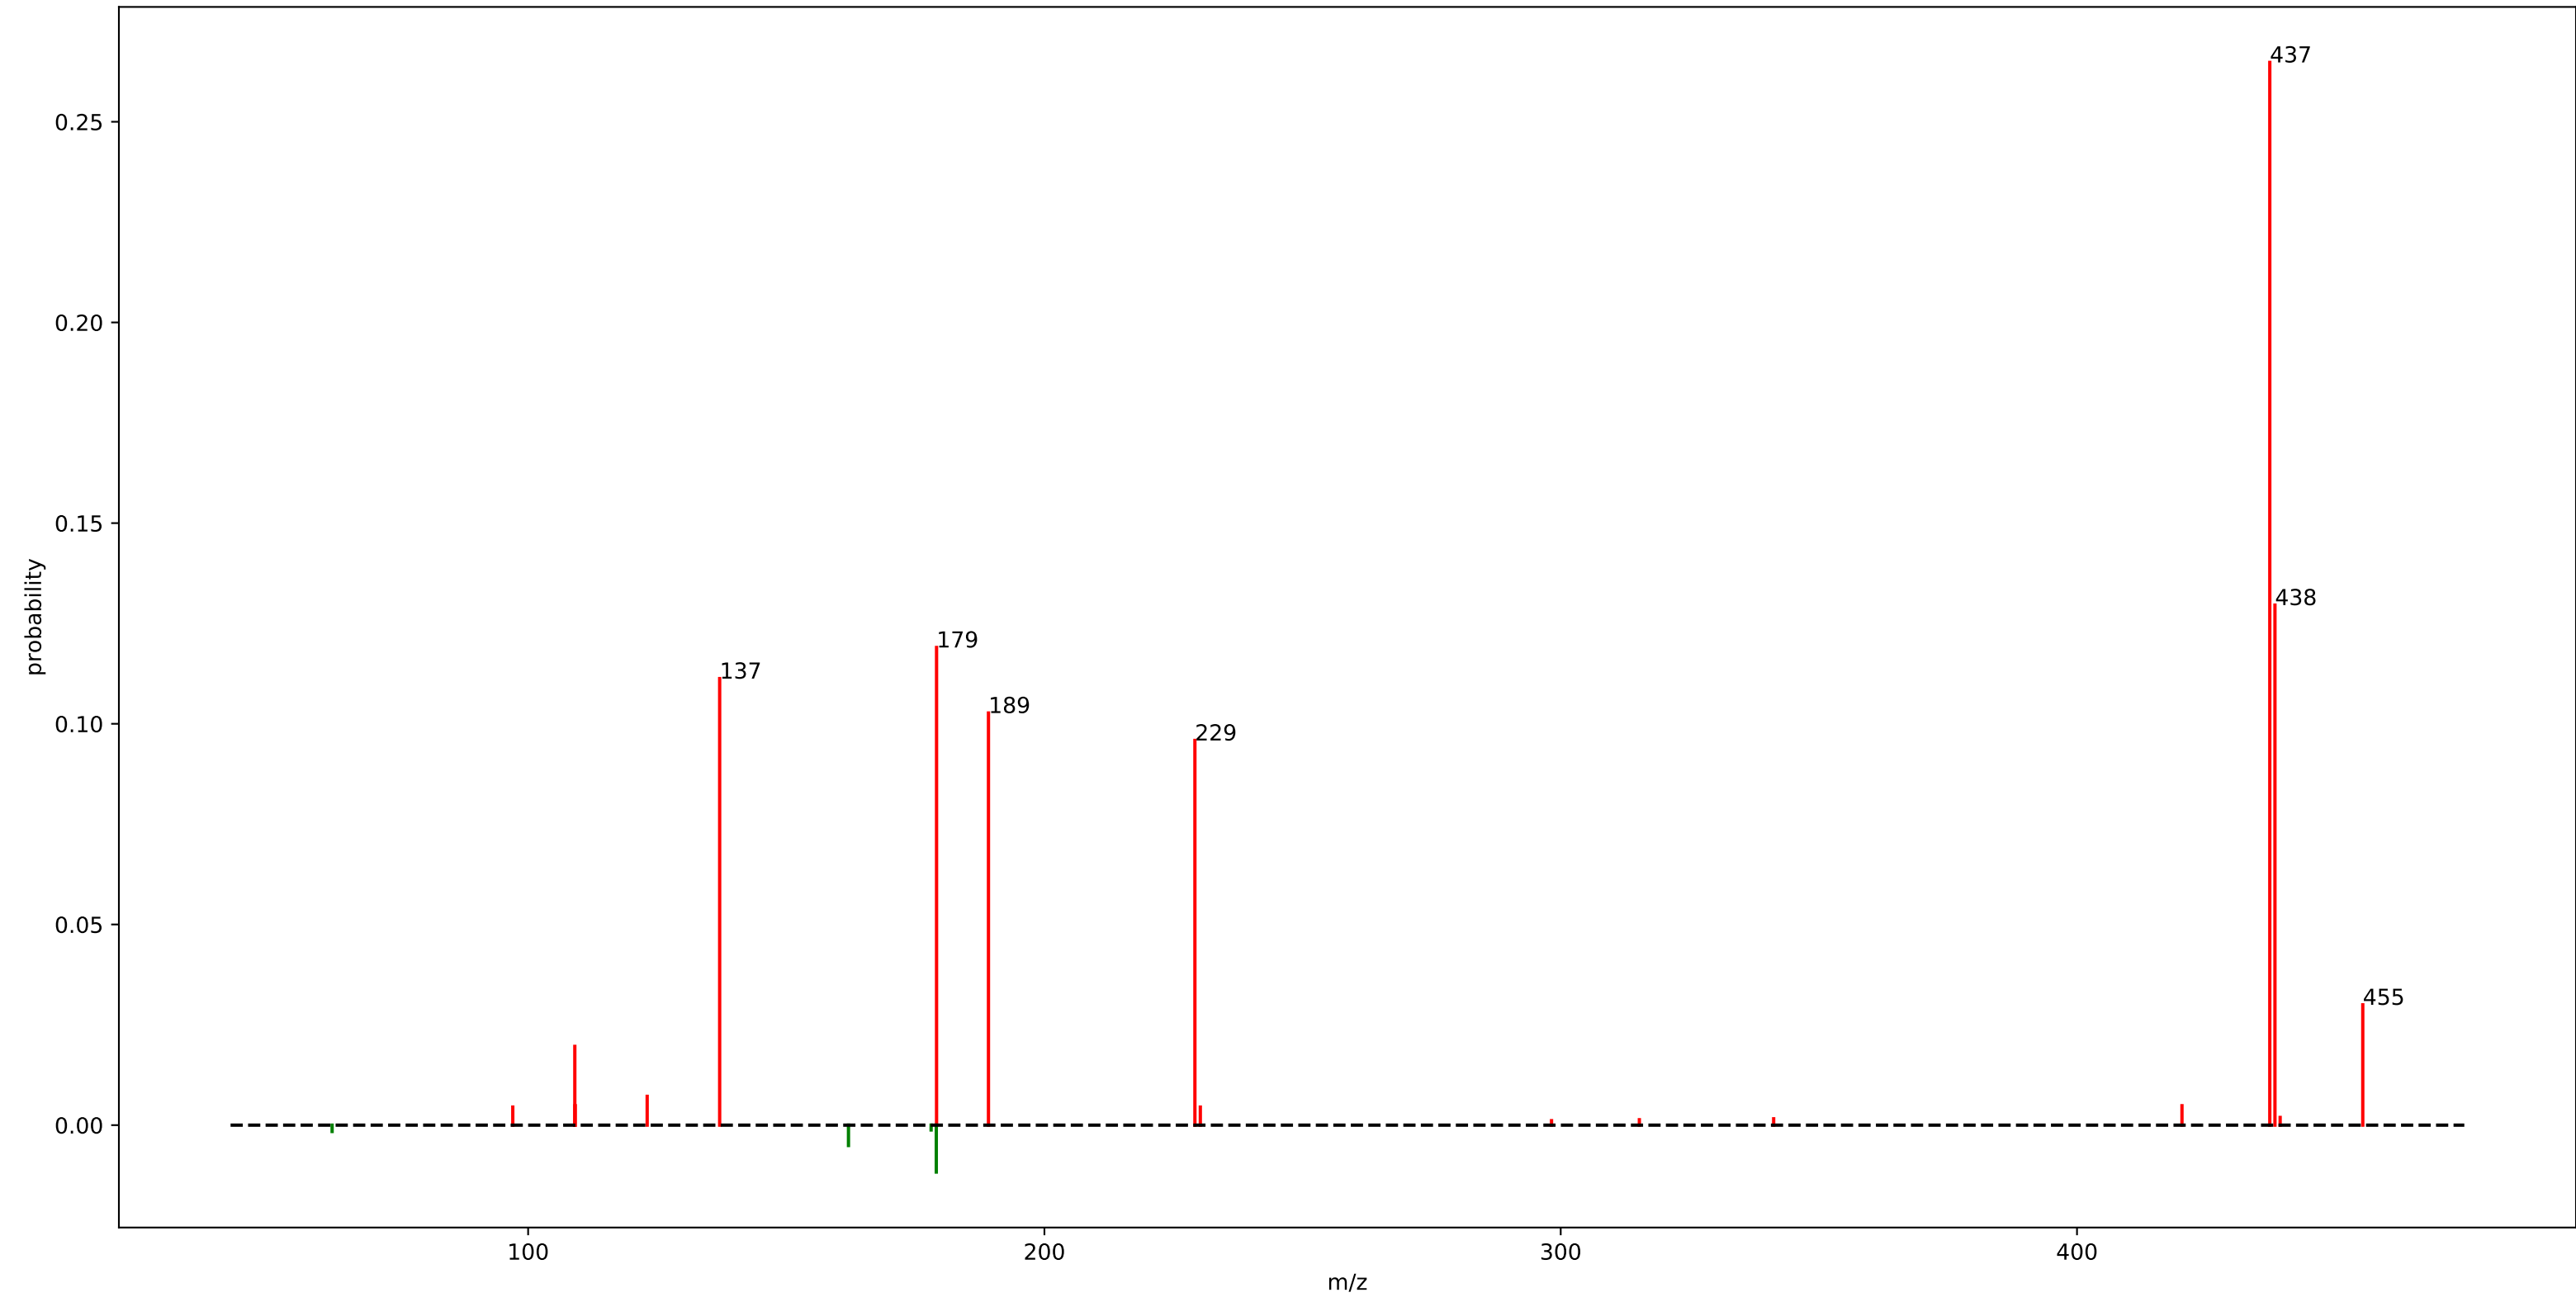

## motif\_556

|                   |        |
|-------------------|--------|
| fragment_437.3425 | : 0.26 |
| fragment_438.3425 | : 0.13 |
| fragment_179.1075 | : 0.12 |
| fragment_137.0975 | : 0.11 |
| fragment_189.1625 | : 0.10 |
| fragment_229.1475 | : 0.10 |
| fragment_455.3525 | : 0.03 |
| fragment_109.0425 | : 0.02 |
| loss_179.0575     | : 0.01 |
| fragment_123.0575 | : 0.01 |
| loss_162.0475     | : 0.01 |

motif\_555

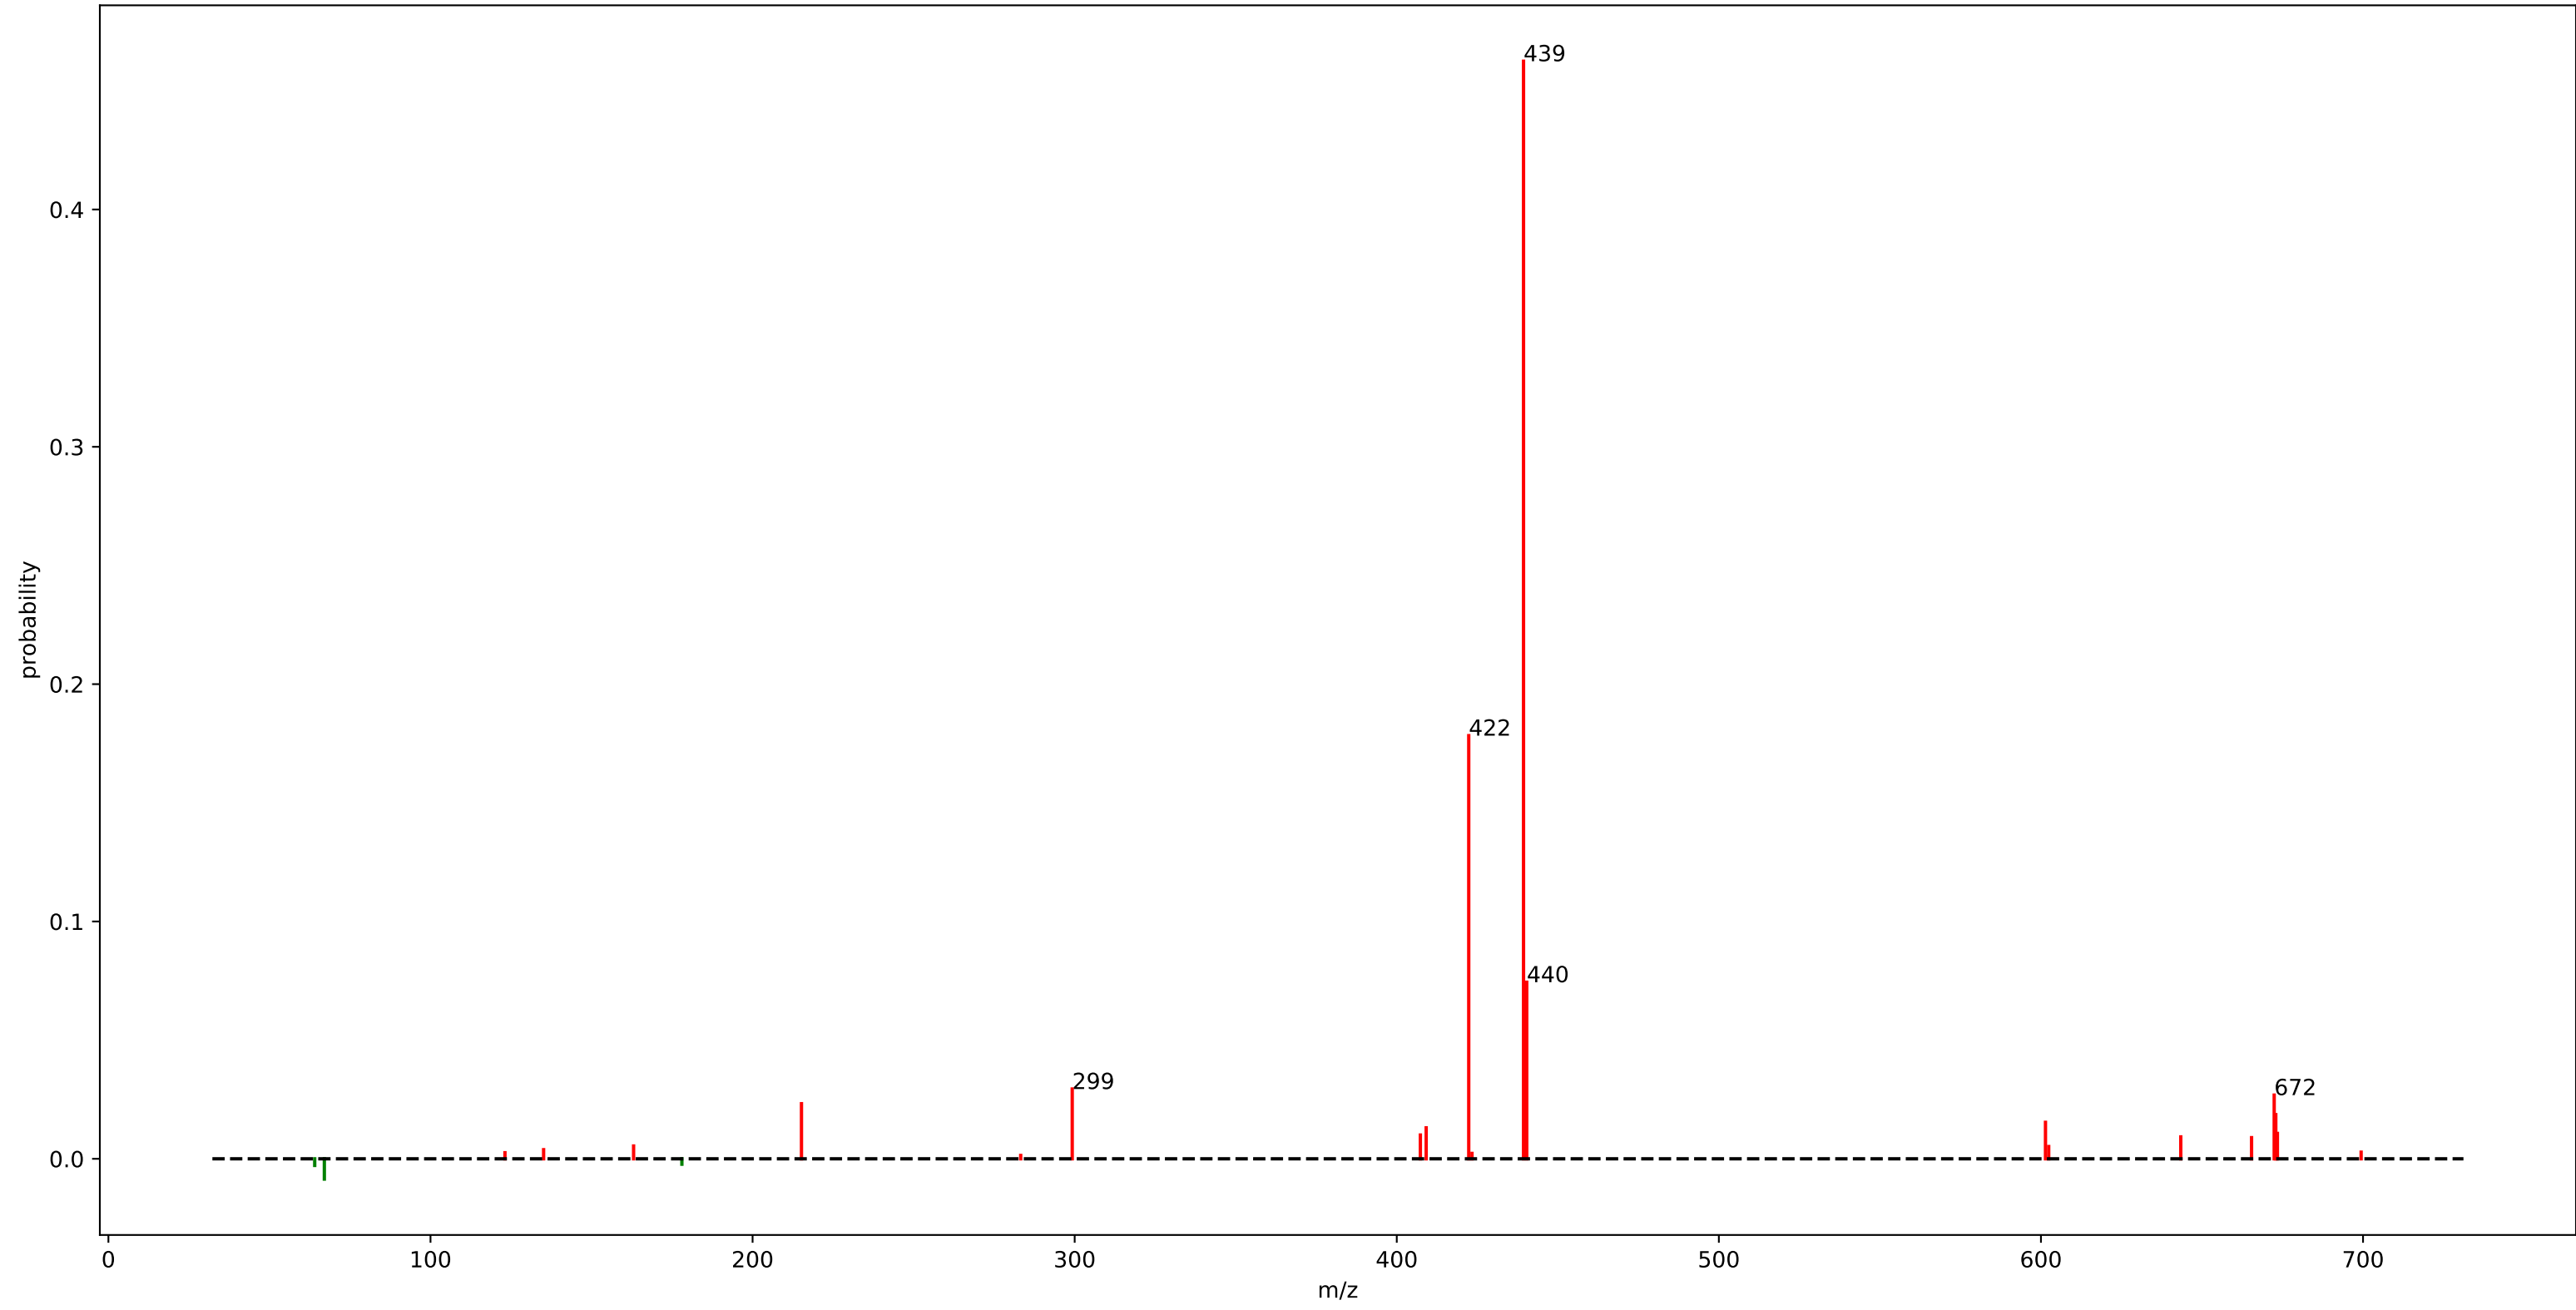

## motif\_555

|                   |        |
|-------------------|--------|
| fragment_439.3575 | : 0.46 |
| fragment_422.3475 | : 0.18 |
| fragment_440.3575 | : 0.07 |
| fragment_299.2375 | : 0.03 |
| fragment_672.4175 | : 0.03 |
| fragment_215.1775 | : 0.02 |
| fragment_672.9175 | : 0.02 |
| fragment_601.4075 | : 0.02 |
| fragment_409.1325 | : 0.01 |
| fragment_673.4175 | : 0.01 |
| fragment_407.3275 | : 0.01 |
| fragment_643.4175 | : 0.01 |
| fragment_665.3925 | : 0.01 |
| loss_67.0425      | : 0.01 |
| fragment_163.0575 | : 0.01 |
| fragment_602.4125 | : 0.01 |

motif\_554

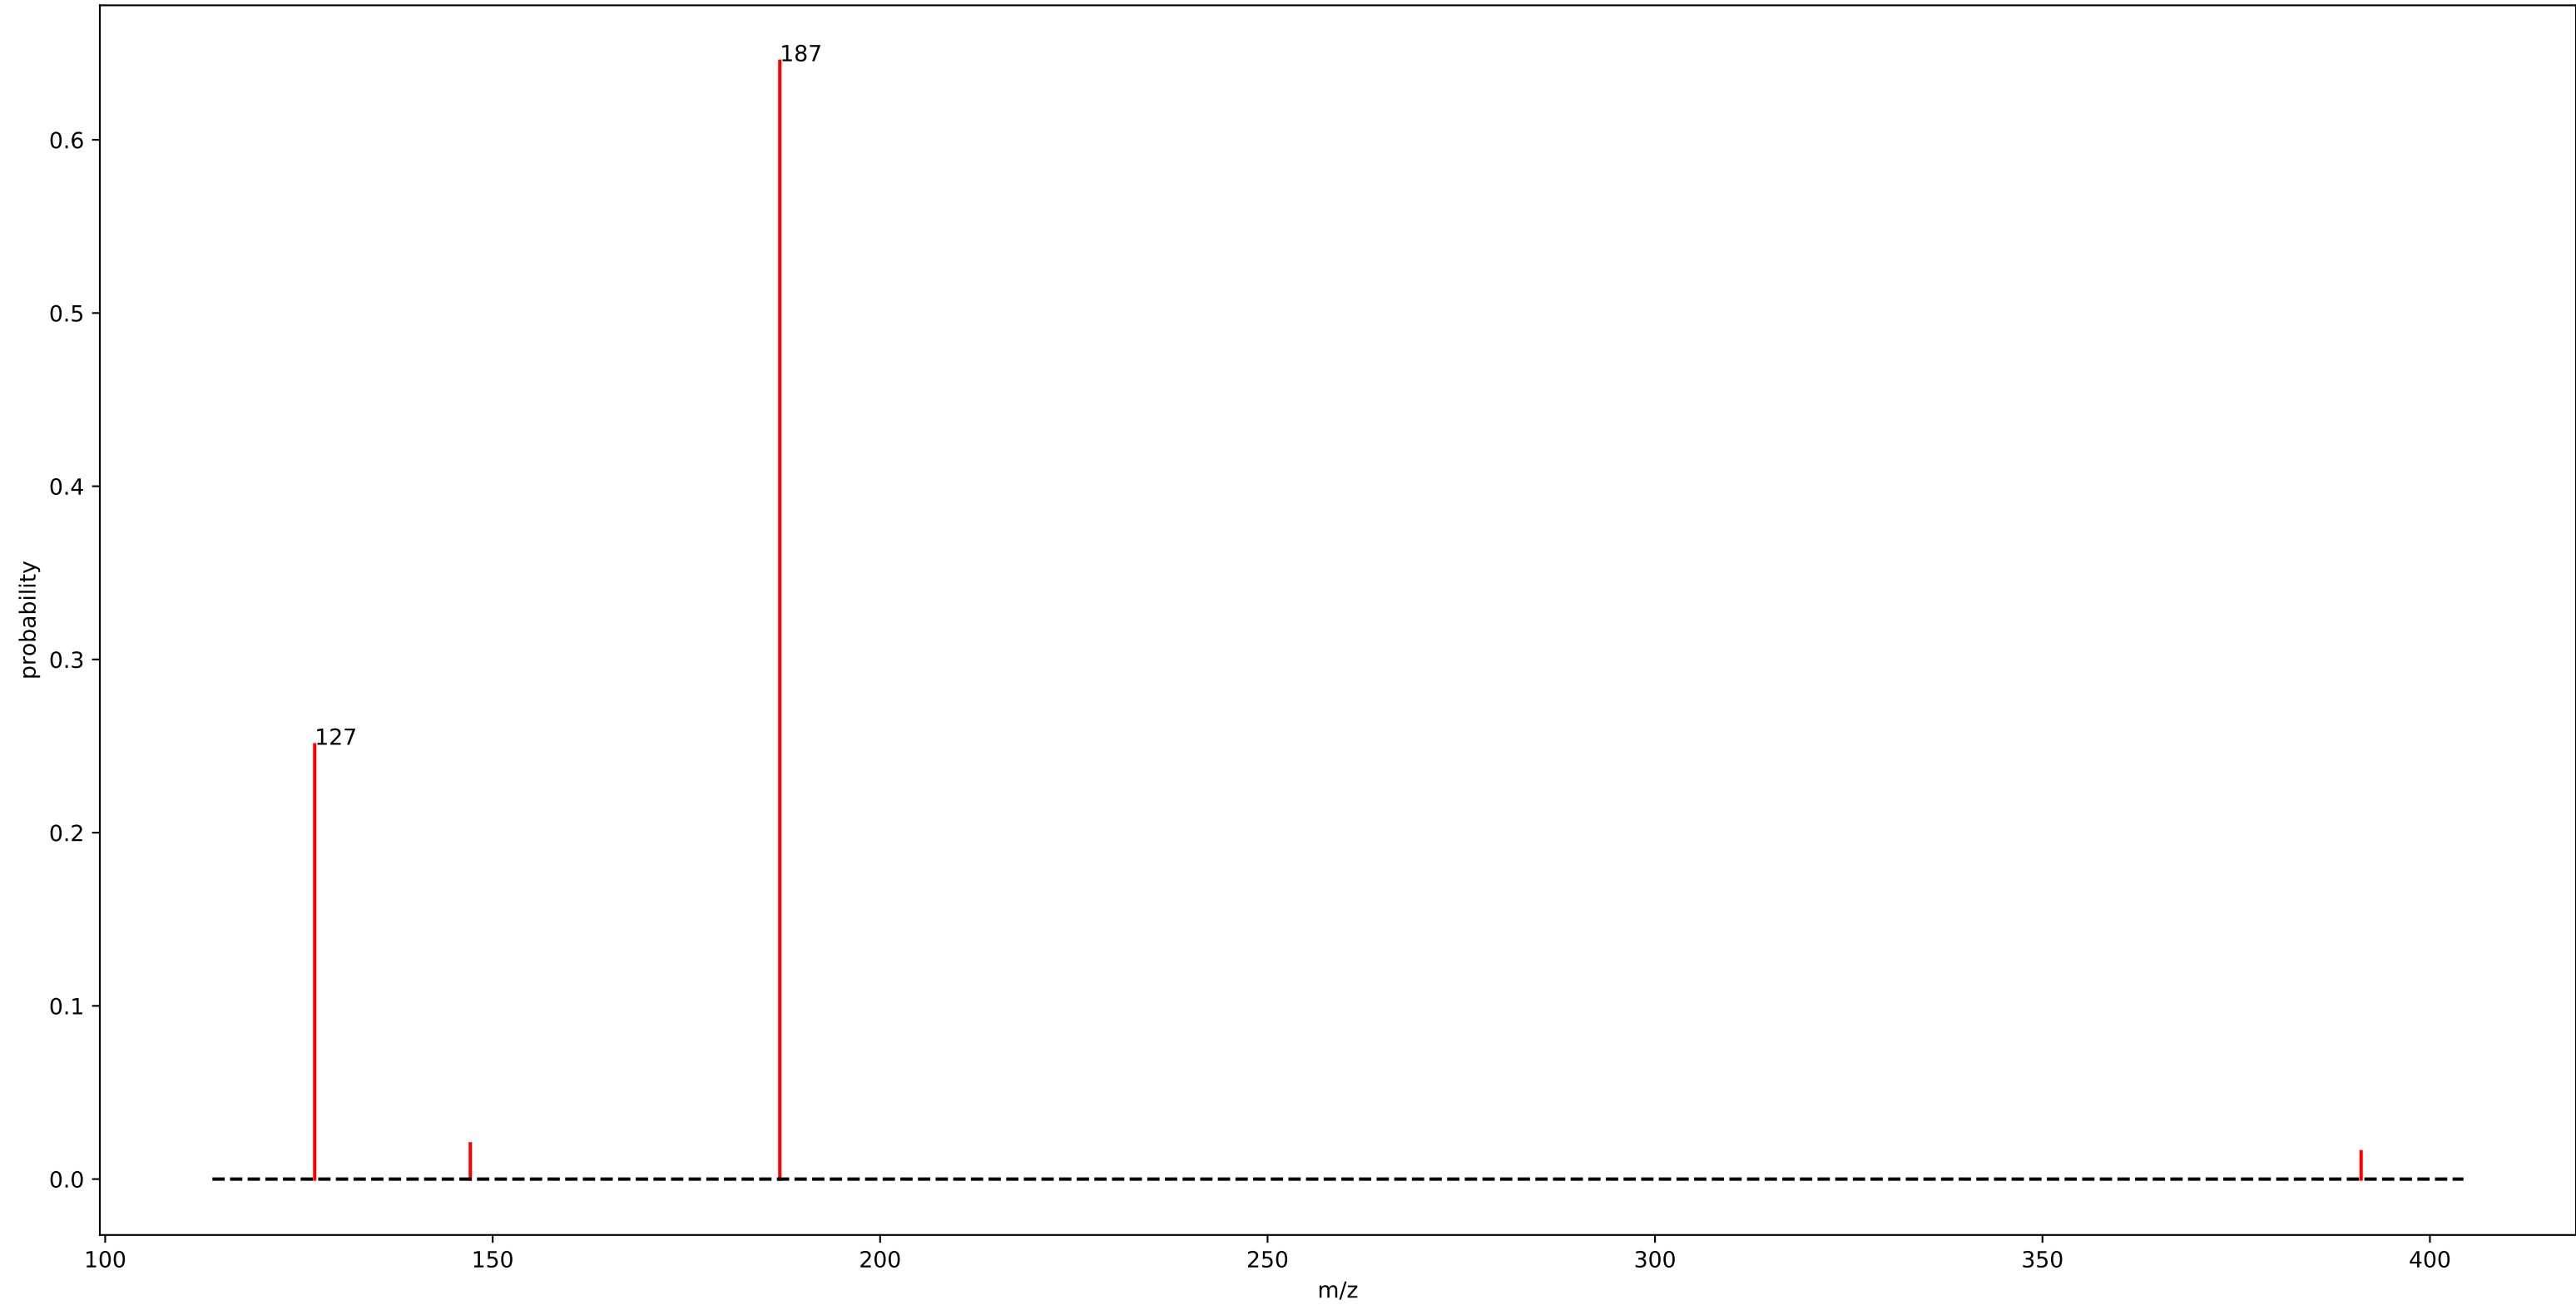

## motif\_554

|                   |        |
|-------------------|--------|
| fragment_187.0575 | : 0.65 |
| fragment_127.0375 | : 0.25 |
| fragment_147.1175 | : 0.02 |
| fragment_391.1225 | : 0.02 |



rhamn\_motif\_172.m2m

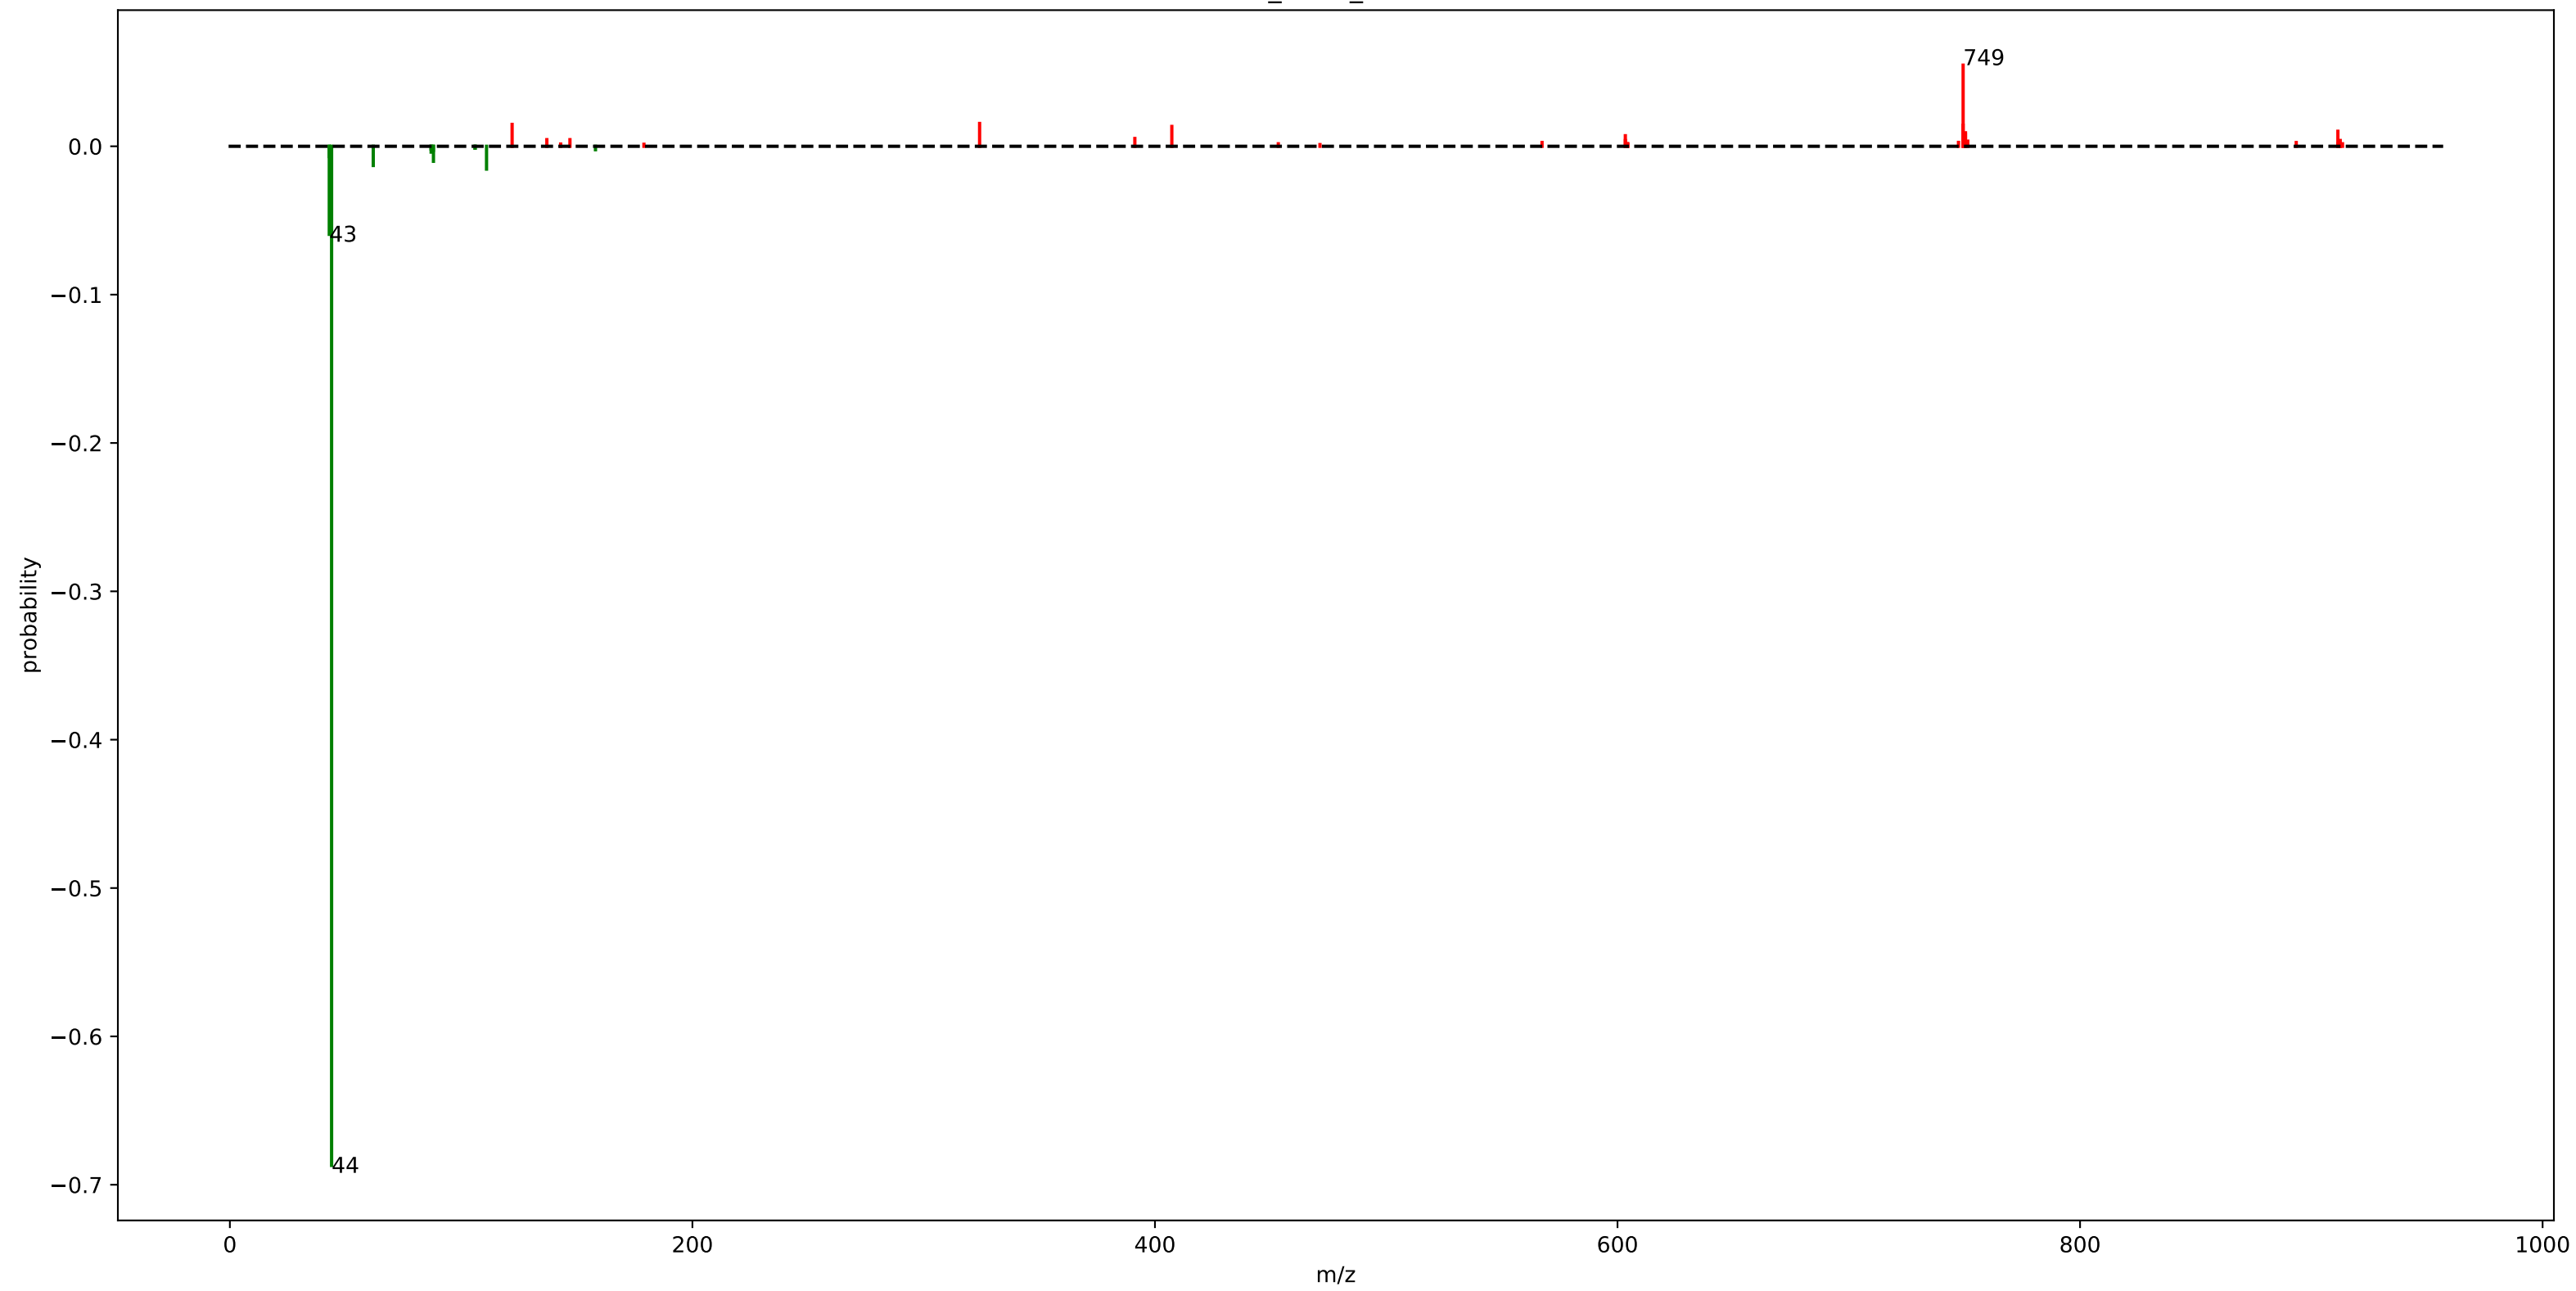

## rhamn\_motif\_172.m2m

|                   |        |
|-------------------|--------|
| loss_43.9875      | : 0.69 |
| loss_42.9825      | : 0.06 |
| fragment_749.4425 | : 0.05 |
| loss_110.9825     | : 0.02 |
| fragment_324.1775 | : 0.02 |
| fragment_122.0375 | : 0.01 |
| fragment_749.4225 | : 0.01 |
| fragment_407.2925 | : 0.01 |
| loss_61.9975      | : 0.01 |
| fragment_911.4875 | : 0.01 |
| loss_88.0275      | : 0.01 |
| fragment_750.4625 | : 0.01 |
| fragment_750.4375 | : 0.01 |
| fragment_603.3825 | : 0.01 |
| loss_42.9775      | : 0.01 |
| fragment_391.3025 | : 0.01 |

rhabdus\_motif\_134.m2m

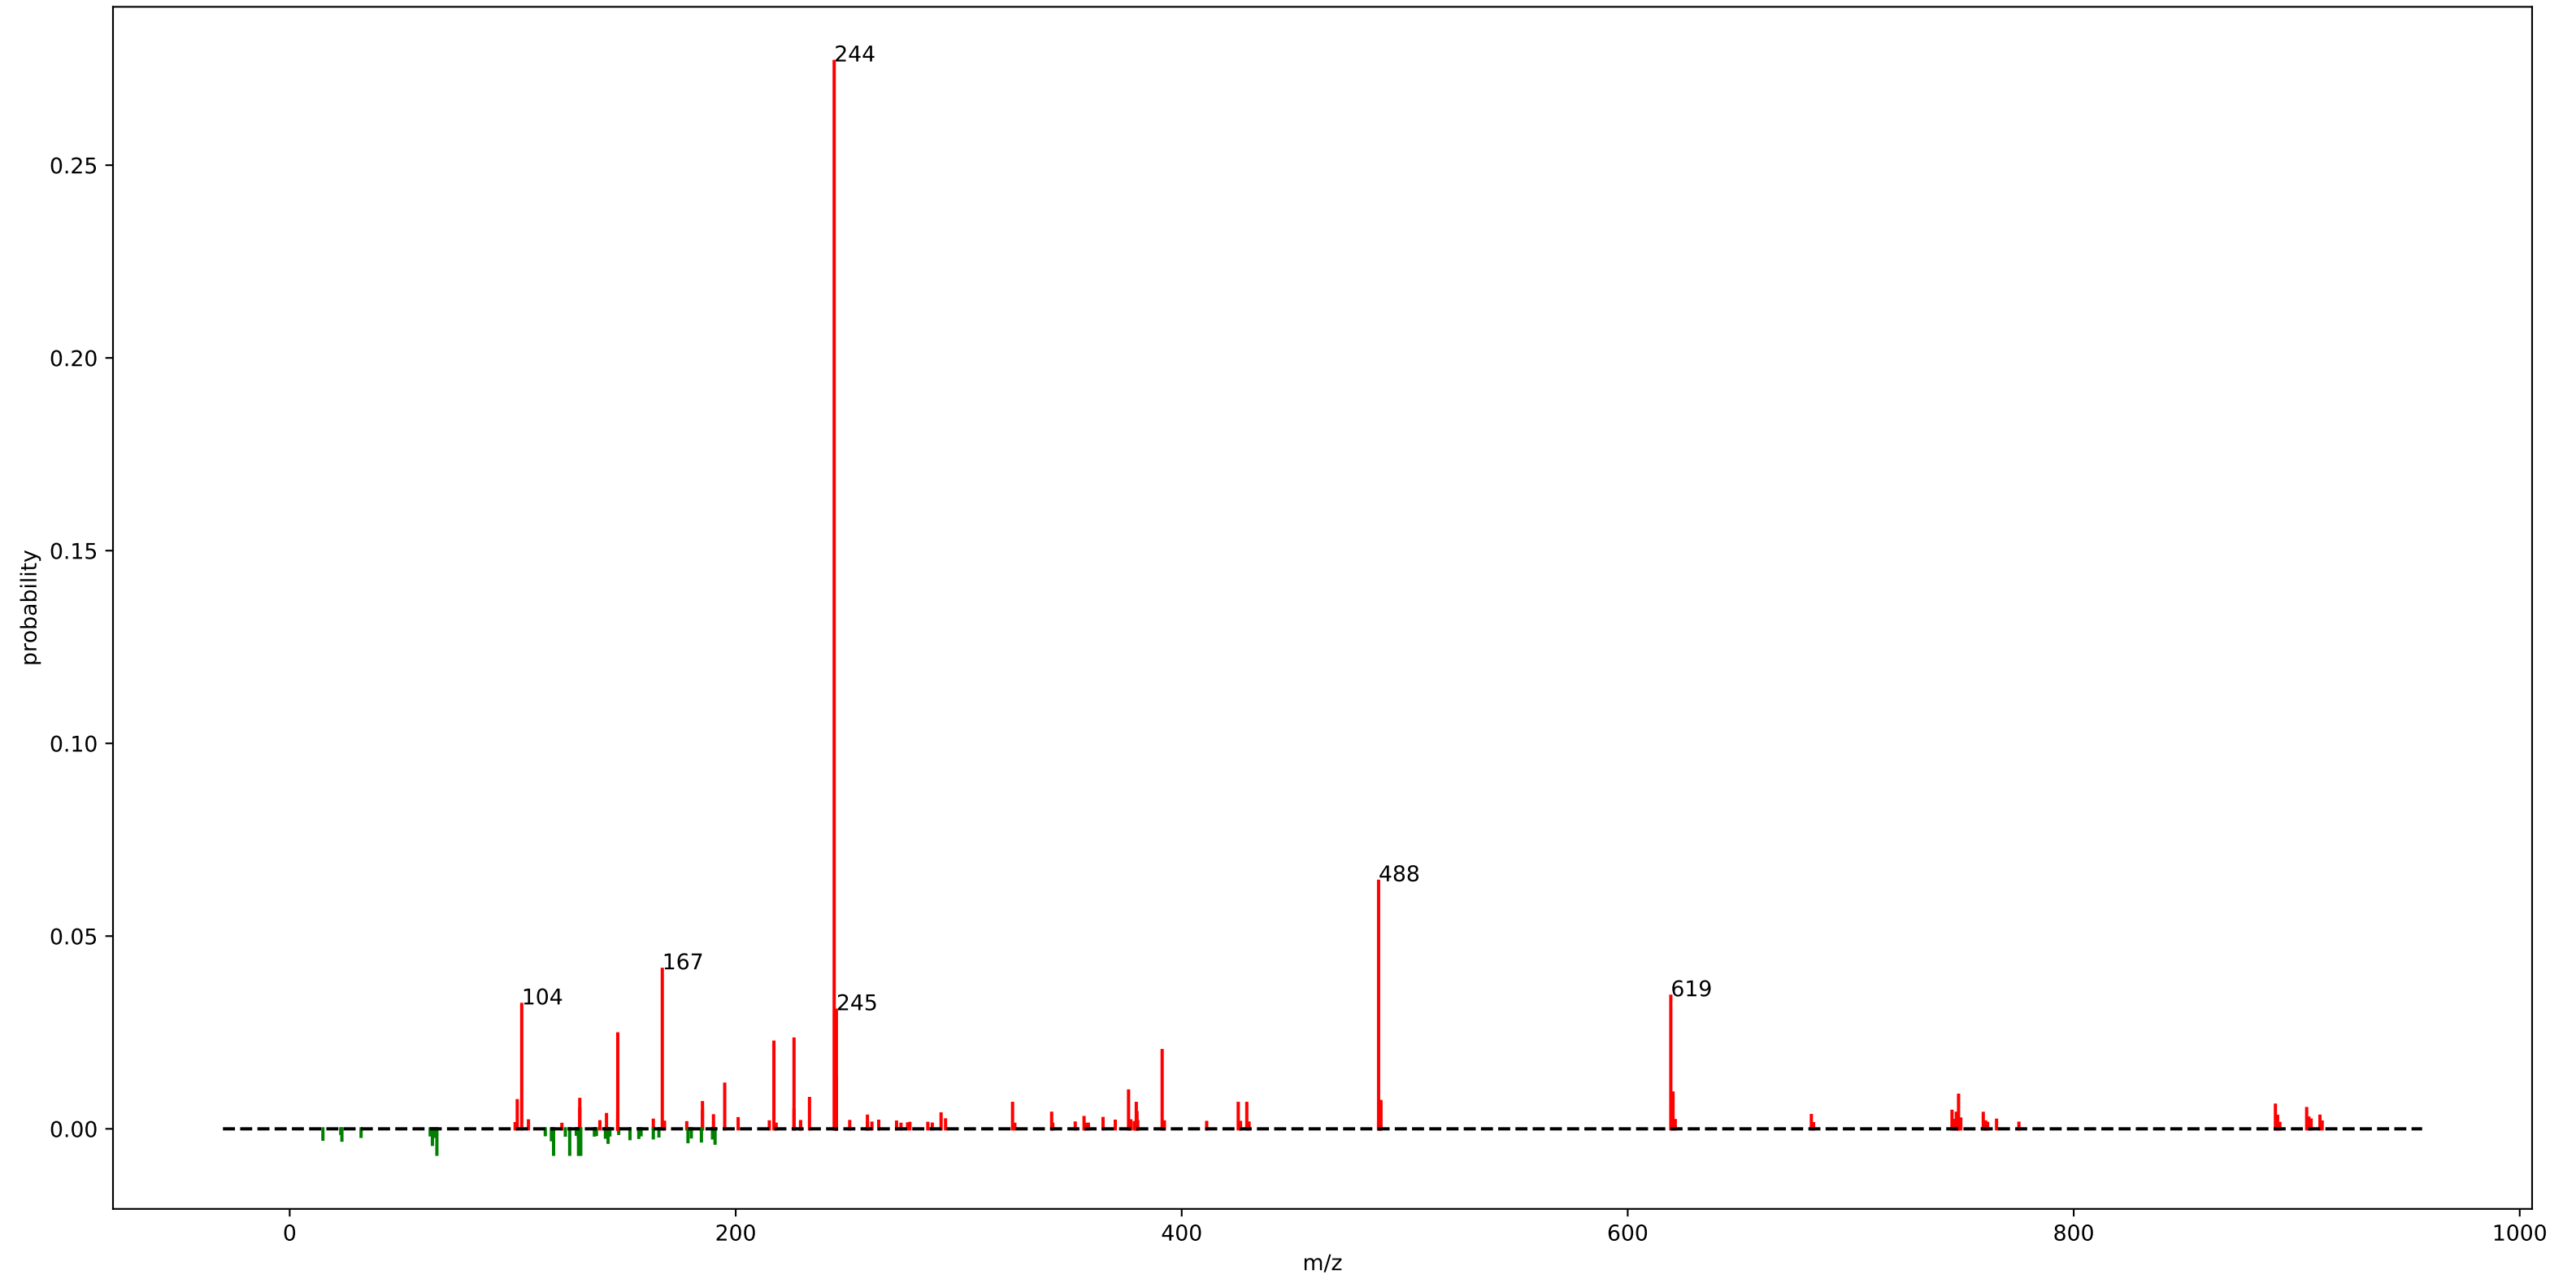

## rhabdus\_motif\_134.m2m

|                   |        |                   |        |
|-------------------|--------|-------------------|--------|
| fragment_244.1625 | : 0.28 | fragment_489.2875 | : 0.01 |
| fragment_488.2875 | : 0.06 | fragment_185.0975 | : 0.01 |
| fragment_167.0825 | : 0.04 | fragment_489.2925 | : 0.01 |
| fragment_619.3275 | : 0.03 | fragment_324.1575 | : 0.01 |
| fragment_104.0525 | : 0.03 | loss_130.5225     | : 0.01 |
| fragment_245.1475 | : 0.03 | fragment_379.6275 | : 0.01 |
| fragment_147.1125 | : 0.02 | loss_129.5175     | : 0.01 |
| fragment_226.1525 | : 0.02 | fragment_425.3575 | : 0.01 |
| fragment_217.1325 | : 0.02 | loss_118.3375     | : 0.01 |
| fragment_391.2325 | : 0.02 | fragment_429.1975 | : 0.01 |
| fragment_244.6475 | : 0.02 | loss_125.5625     | : 0.01 |
| fragment_245.1525 | : 0.01 | loss_66.0025      | : 0.01 |
| fragment_147.1075 | : 0.01 | fragment_890.4525 | : 0.01 |
| fragment_195.0775 | : 0.01 | fragment_904.4675 | : 0.01 |
| fragment_376.1675 | : 0.01 | fragment_130.0775 | : 0.01 |
| fragment_620.3325 | : 0.01 |                   |        |
| fragment_748.3675 | : 0.01 |                   |        |
| fragment_233.0975 | : 0.01 |                   |        |
| fragment_130.0825 | : 0.01 |                   |        |
| fragment_102.0525 | : 0.01 |                   |        |

euphorbia\_motif\_467.m2m

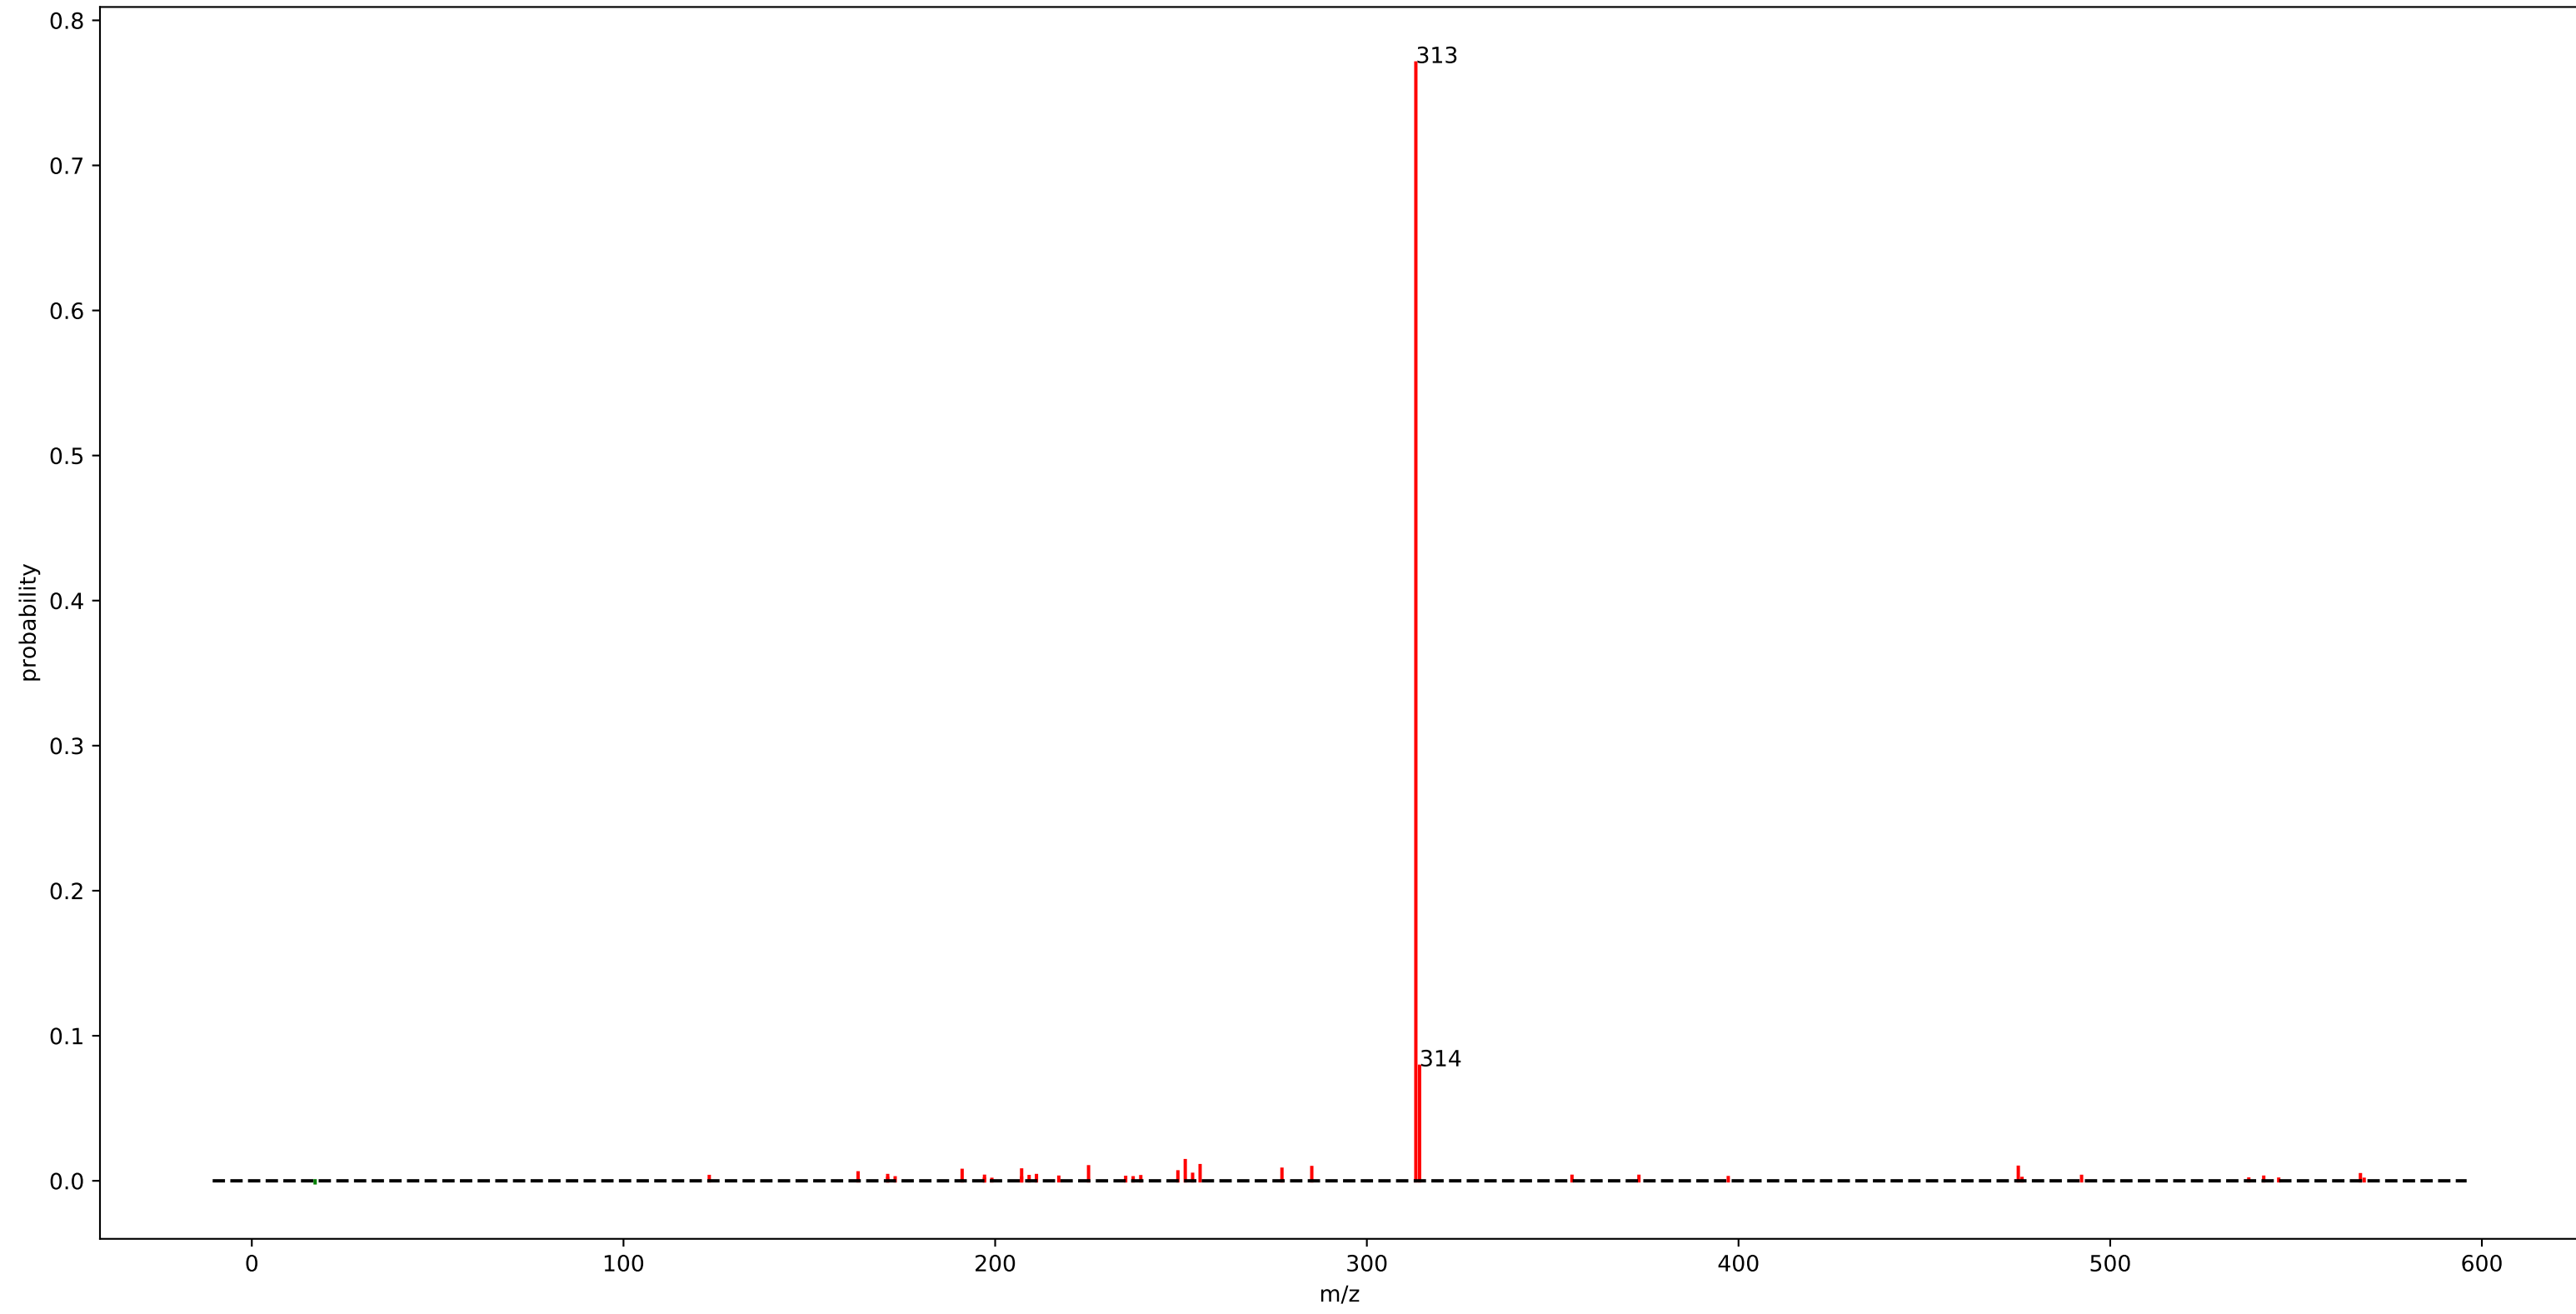

## euphorbia\_motif\_467.m2m

|                   |        |
|-------------------|--------|
| fragment_313.1825 | : 0.77 |
| fragment_314.1825 | : 0.08 |
| fragment_251.1425 | : 0.01 |
| fragment_255.1375 | : 0.01 |
| fragment_225.1275 | : 0.01 |
| fragment_475.2725 | : 0.01 |
| fragment_285.1825 | : 0.01 |
| fragment_277.1575 | : 0.01 |
| fragment_207.1175 | : 0.01 |
| fragment_191.1075 | : 0.01 |
| fragment_249.1625 | : 0.01 |
| fragment_163.1125 | : 0.01 |

rhabdus\_motif\_272.m2m

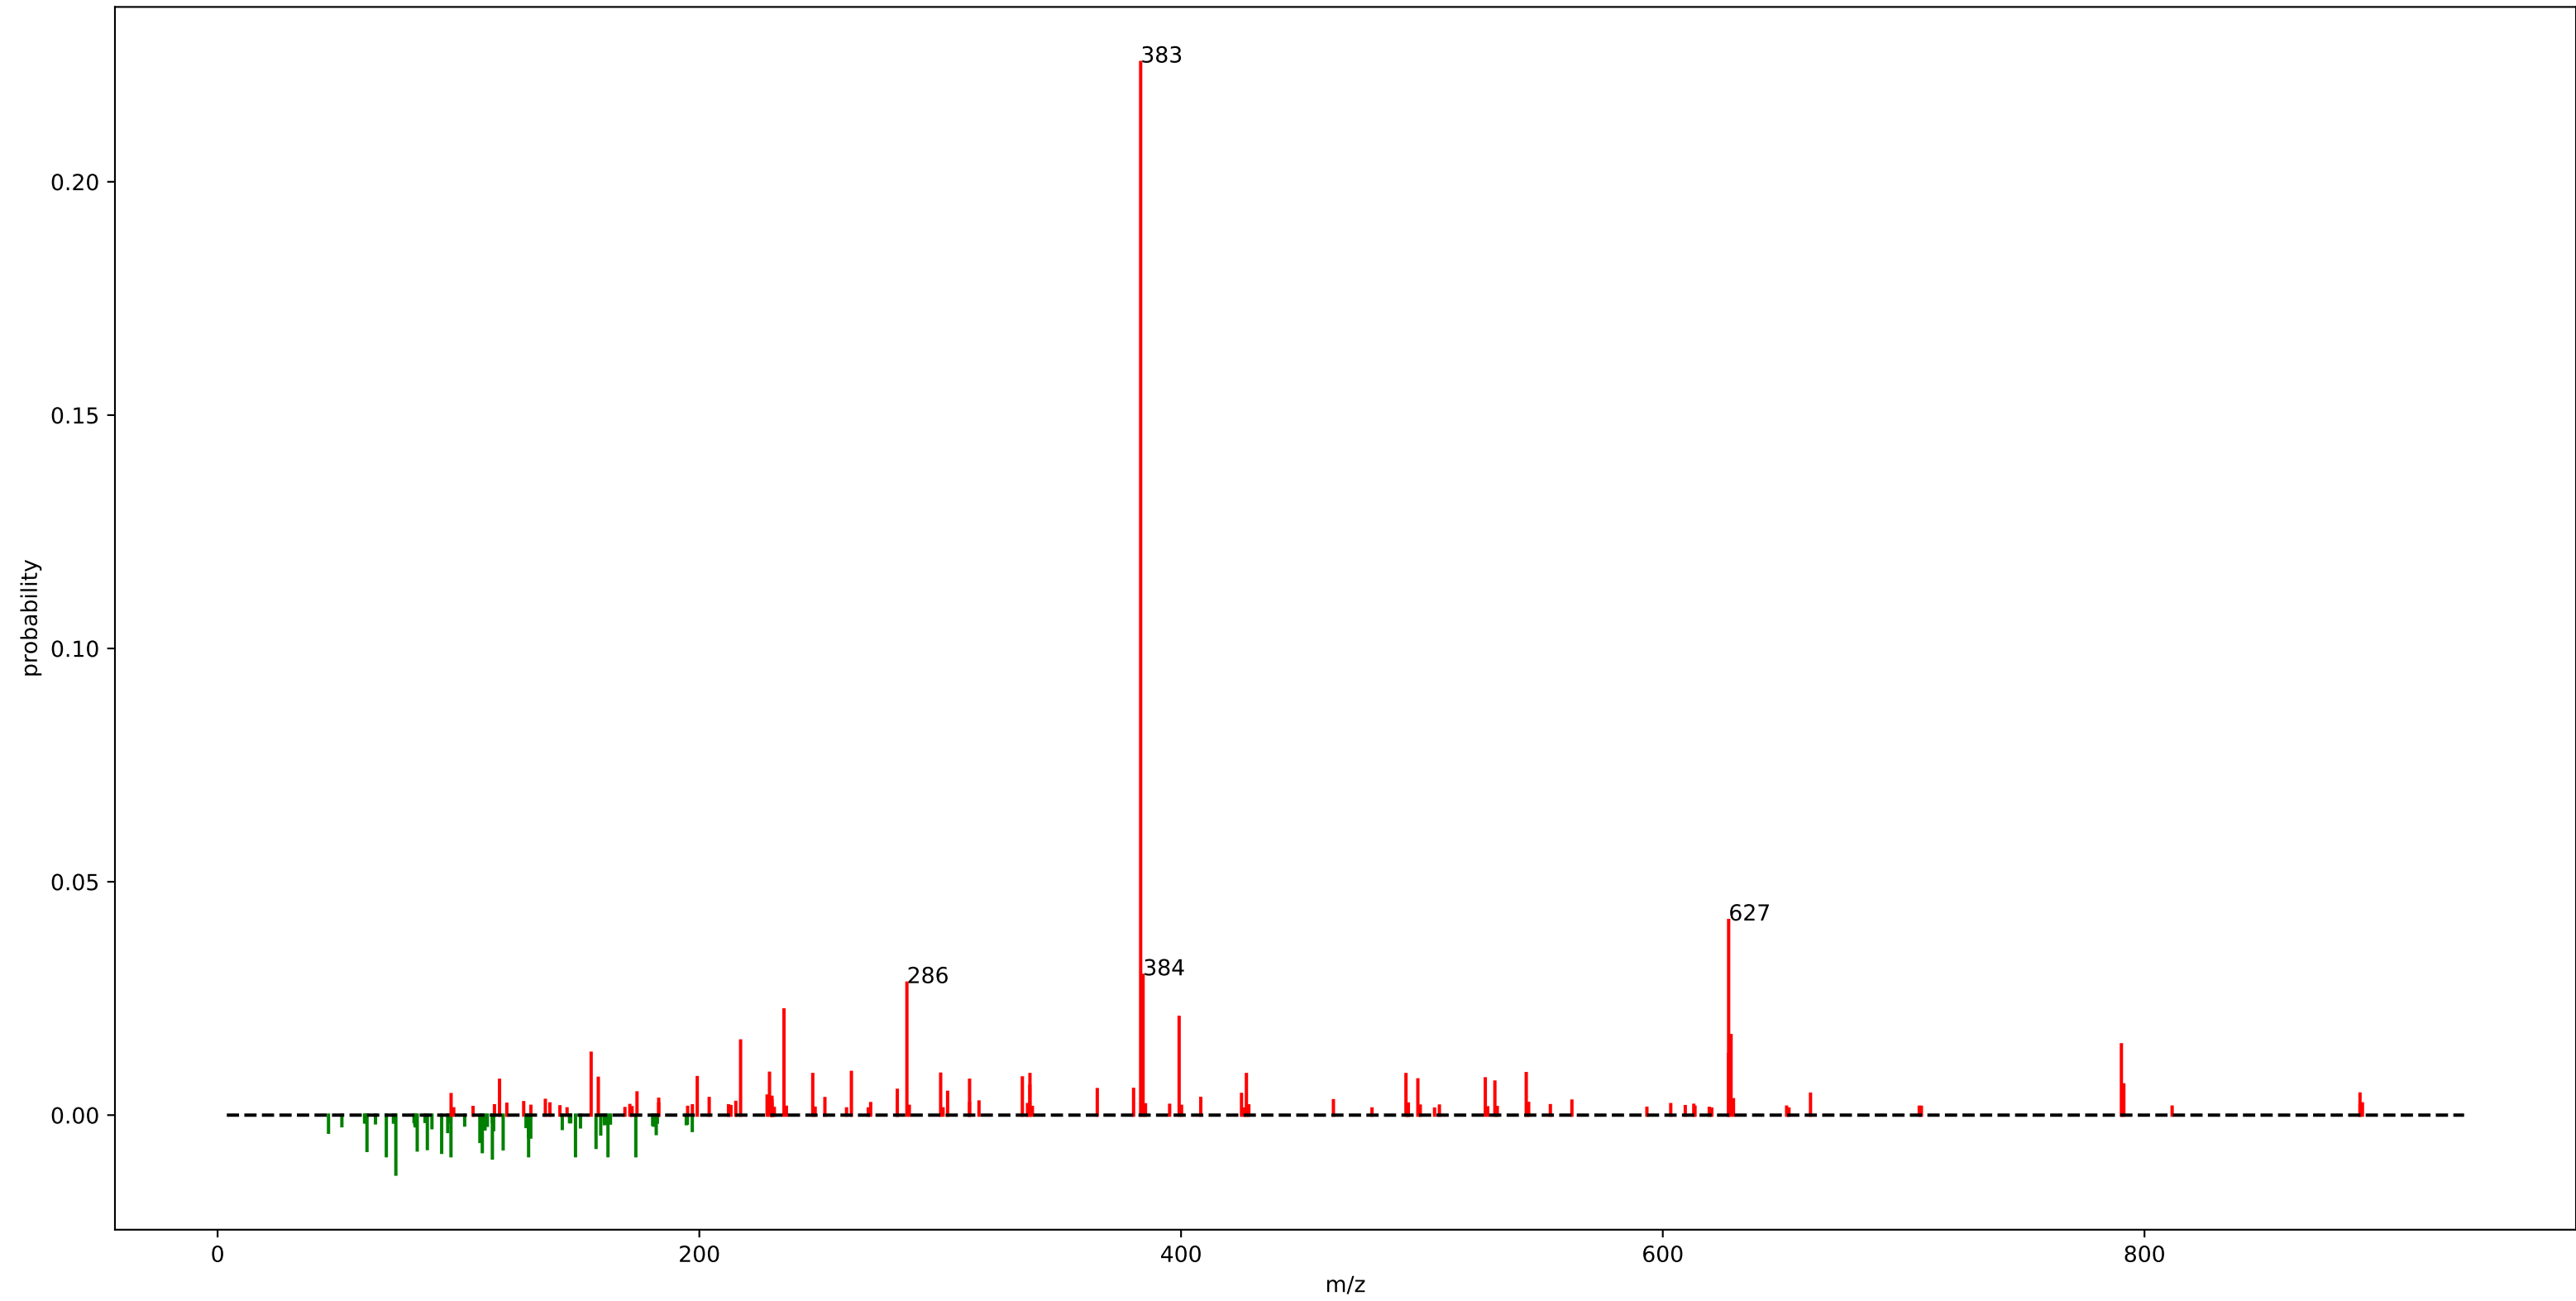

# rhabdus\_motif\_272.m2m

|                   |        |                   |        |                   |        |
|-------------------|--------|-------------------|--------|-------------------|--------|
| fragment_383.2275 | : 0.23 | fragment_247.0875 | : 0.01 | fragment_530.2975 | : 0.01 |
| fragment_627.3475 | : 0.04 | loss_96.8875      | : 0.01 | loss_157.1125     | : 0.01 |
| fragment_384.2325 | : 0.03 | loss_173.6275     | : 0.01 | fragment_791.4175 | : 0.01 |
| fragment_286.1775 | : 0.03 | loss_129.1125     | : 0.01 | fragment_337.2225 | : 0.01 |
| fragment_235.1425 | : 0.02 | fragment_493.3775 | : 0.01 | loss_108.8875     | : 0.01 |
| fragment_399.2025 | : 0.02 | loss_70.0475      | : 0.01 | fragment_380.2925 | : 0.01 |
| fragment_628.3525 | : 0.02 | loss_162.0725     | : 0.01 | fragment_365.2175 | : 0.01 |
| fragment_217.1325 | : 0.02 | fragment_199.1425 | : 0.01 | fragment_282.1925 | : 0.01 |
| fragment_790.4125 | : 0.02 | fragment_334.1175 | : 0.01 |                   |        |
| fragment_155.0825 | : 0.01 | loss_93.0225      | : 0.01 |                   |        |
| fragment_627.3525 | : 0.01 | fragment_158.0625 | : 0.01 |                   |        |
| loss_74.0025      | : 0.01 | loss_109.8975     | : 0.01 |                   |        |
| loss_114.0775     | : 0.01 | fragment_526.3125 | : 0.01 |                   |        |
| fragment_263.1375 | : 0.01 | loss_62.0175      | : 0.01 |                   |        |
| fragment_229.1375 | : 0.01 | fragment_498.3175 | : 0.01 |                   |        |
| fragment_543.3175 | : 0.01 | fragment_312.1975 | : 0.01 |                   |        |
| fragment_300.1925 | : 0.01 | loss_82.8725      | : 0.01 |                   |        |
| fragment_427.1375 | : 0.01 | fragment_117.0525 | : 0.01 |                   |        |
| loss_148.5825     | : 0.01 | loss_118.5575     | : 0.01 |                   |        |
| fragment_337.2725 | : 0.01 | loss_87.0775      | : 0.01 |                   |        |



StrepSalini\_motif\_238.m2m

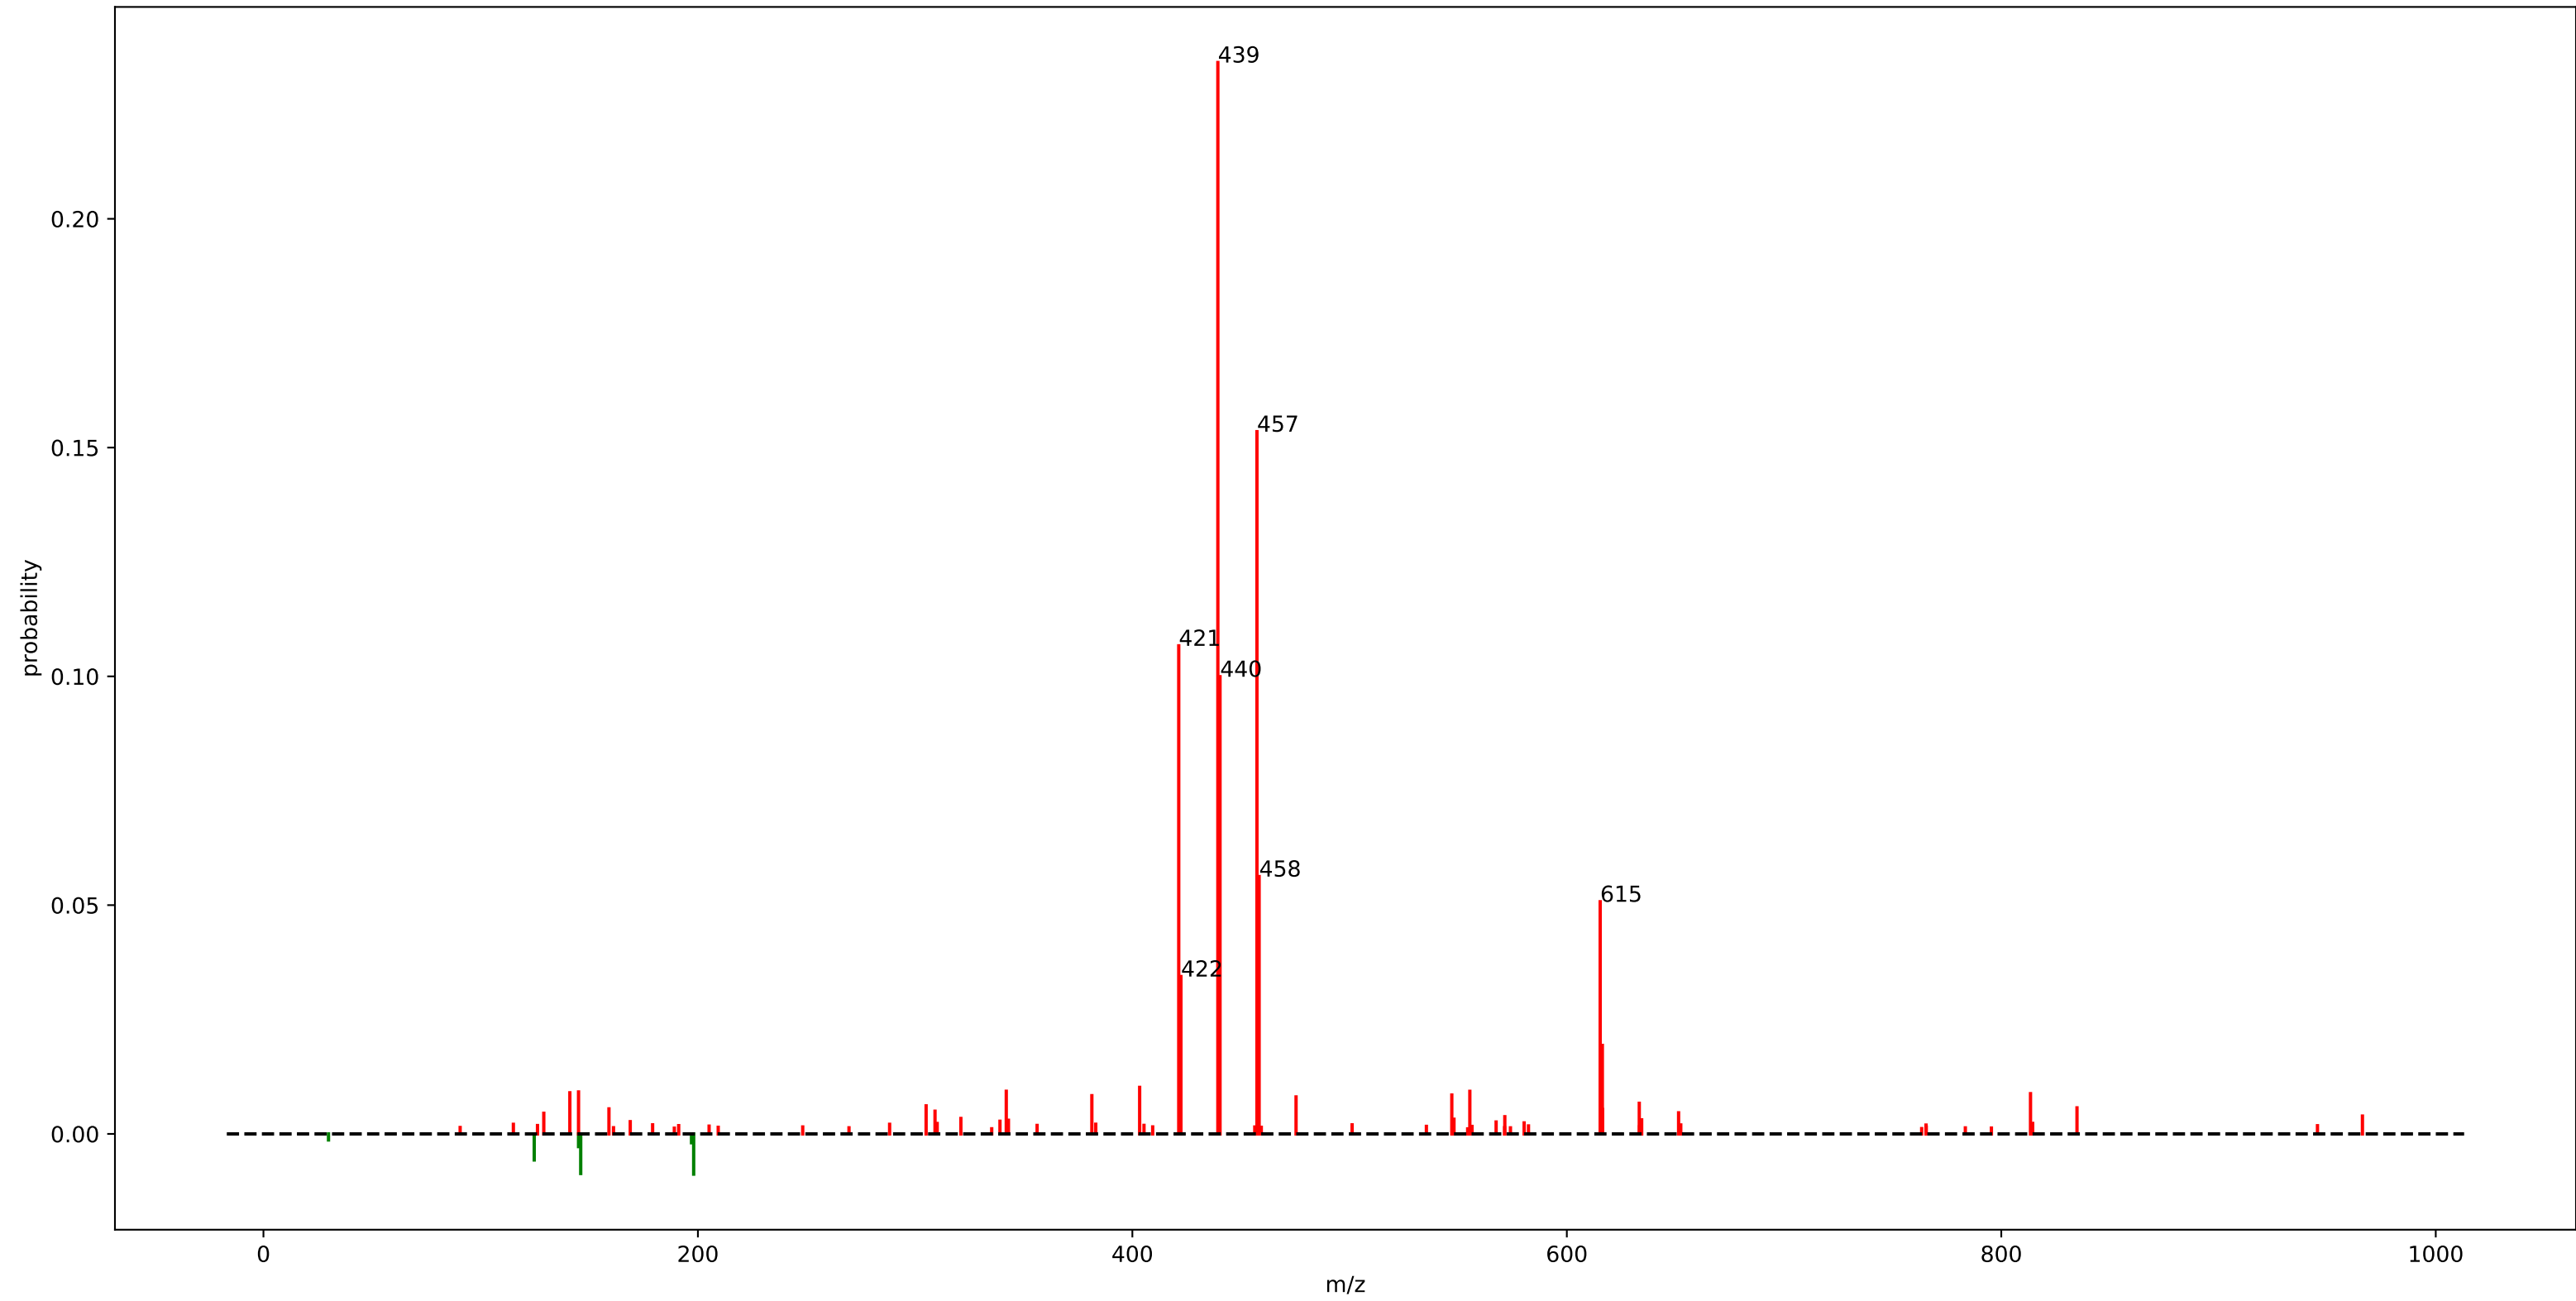

## StrepSalini\_motif\_238.m2m

|                   |        |                   |        |
|-------------------|--------|-------------------|--------|
| fragment_439.3525 | : 0.23 | fragment_305.0500 | : 0.01 |
| fragment_457.3500 | : 0.15 | fragment_834.8500 | : 0.01 |
| fragment_421.3500 | : 0.11 | loss_124.6500     | : 0.01 |
| fragment_440.3500 | : 0.10 | fragment_159.0500 | : 0.01 |
| fragment_458.3500 | : 0.06 | fragment_616.4500 | : 0.01 |
| fragment_615.3500 | : 0.05 |                   |        |
| fragment_422.3525 | : 0.03 |                   |        |
| fragment_616.3500 | : 0.02 |                   |        |
| fragment_403.3500 | : 0.01 |                   |        |
| fragment_341.9500 | : 0.01 |                   |        |
| fragment_555.3500 | : 0.01 |                   |        |
| fragment_145.0500 | : 0.01 |                   |        |
| fragment_141.0500 | : 0.01 |                   |        |
| fragment_813.4500 | : 0.01 |                   |        |
| loss_198.0500     | : 0.01 |                   |        |
| loss_146.0525     | : 0.01 |                   |        |
| fragment_547.0500 | : 0.01 |                   |        |
| fragment_381.3500 | : 0.01 |                   |        |
| fragment_475.3500 | : 0.01 |                   |        |
| fragment_633.3500 | : 0.01 |                   |        |

gnps\_motif\_42.m2m

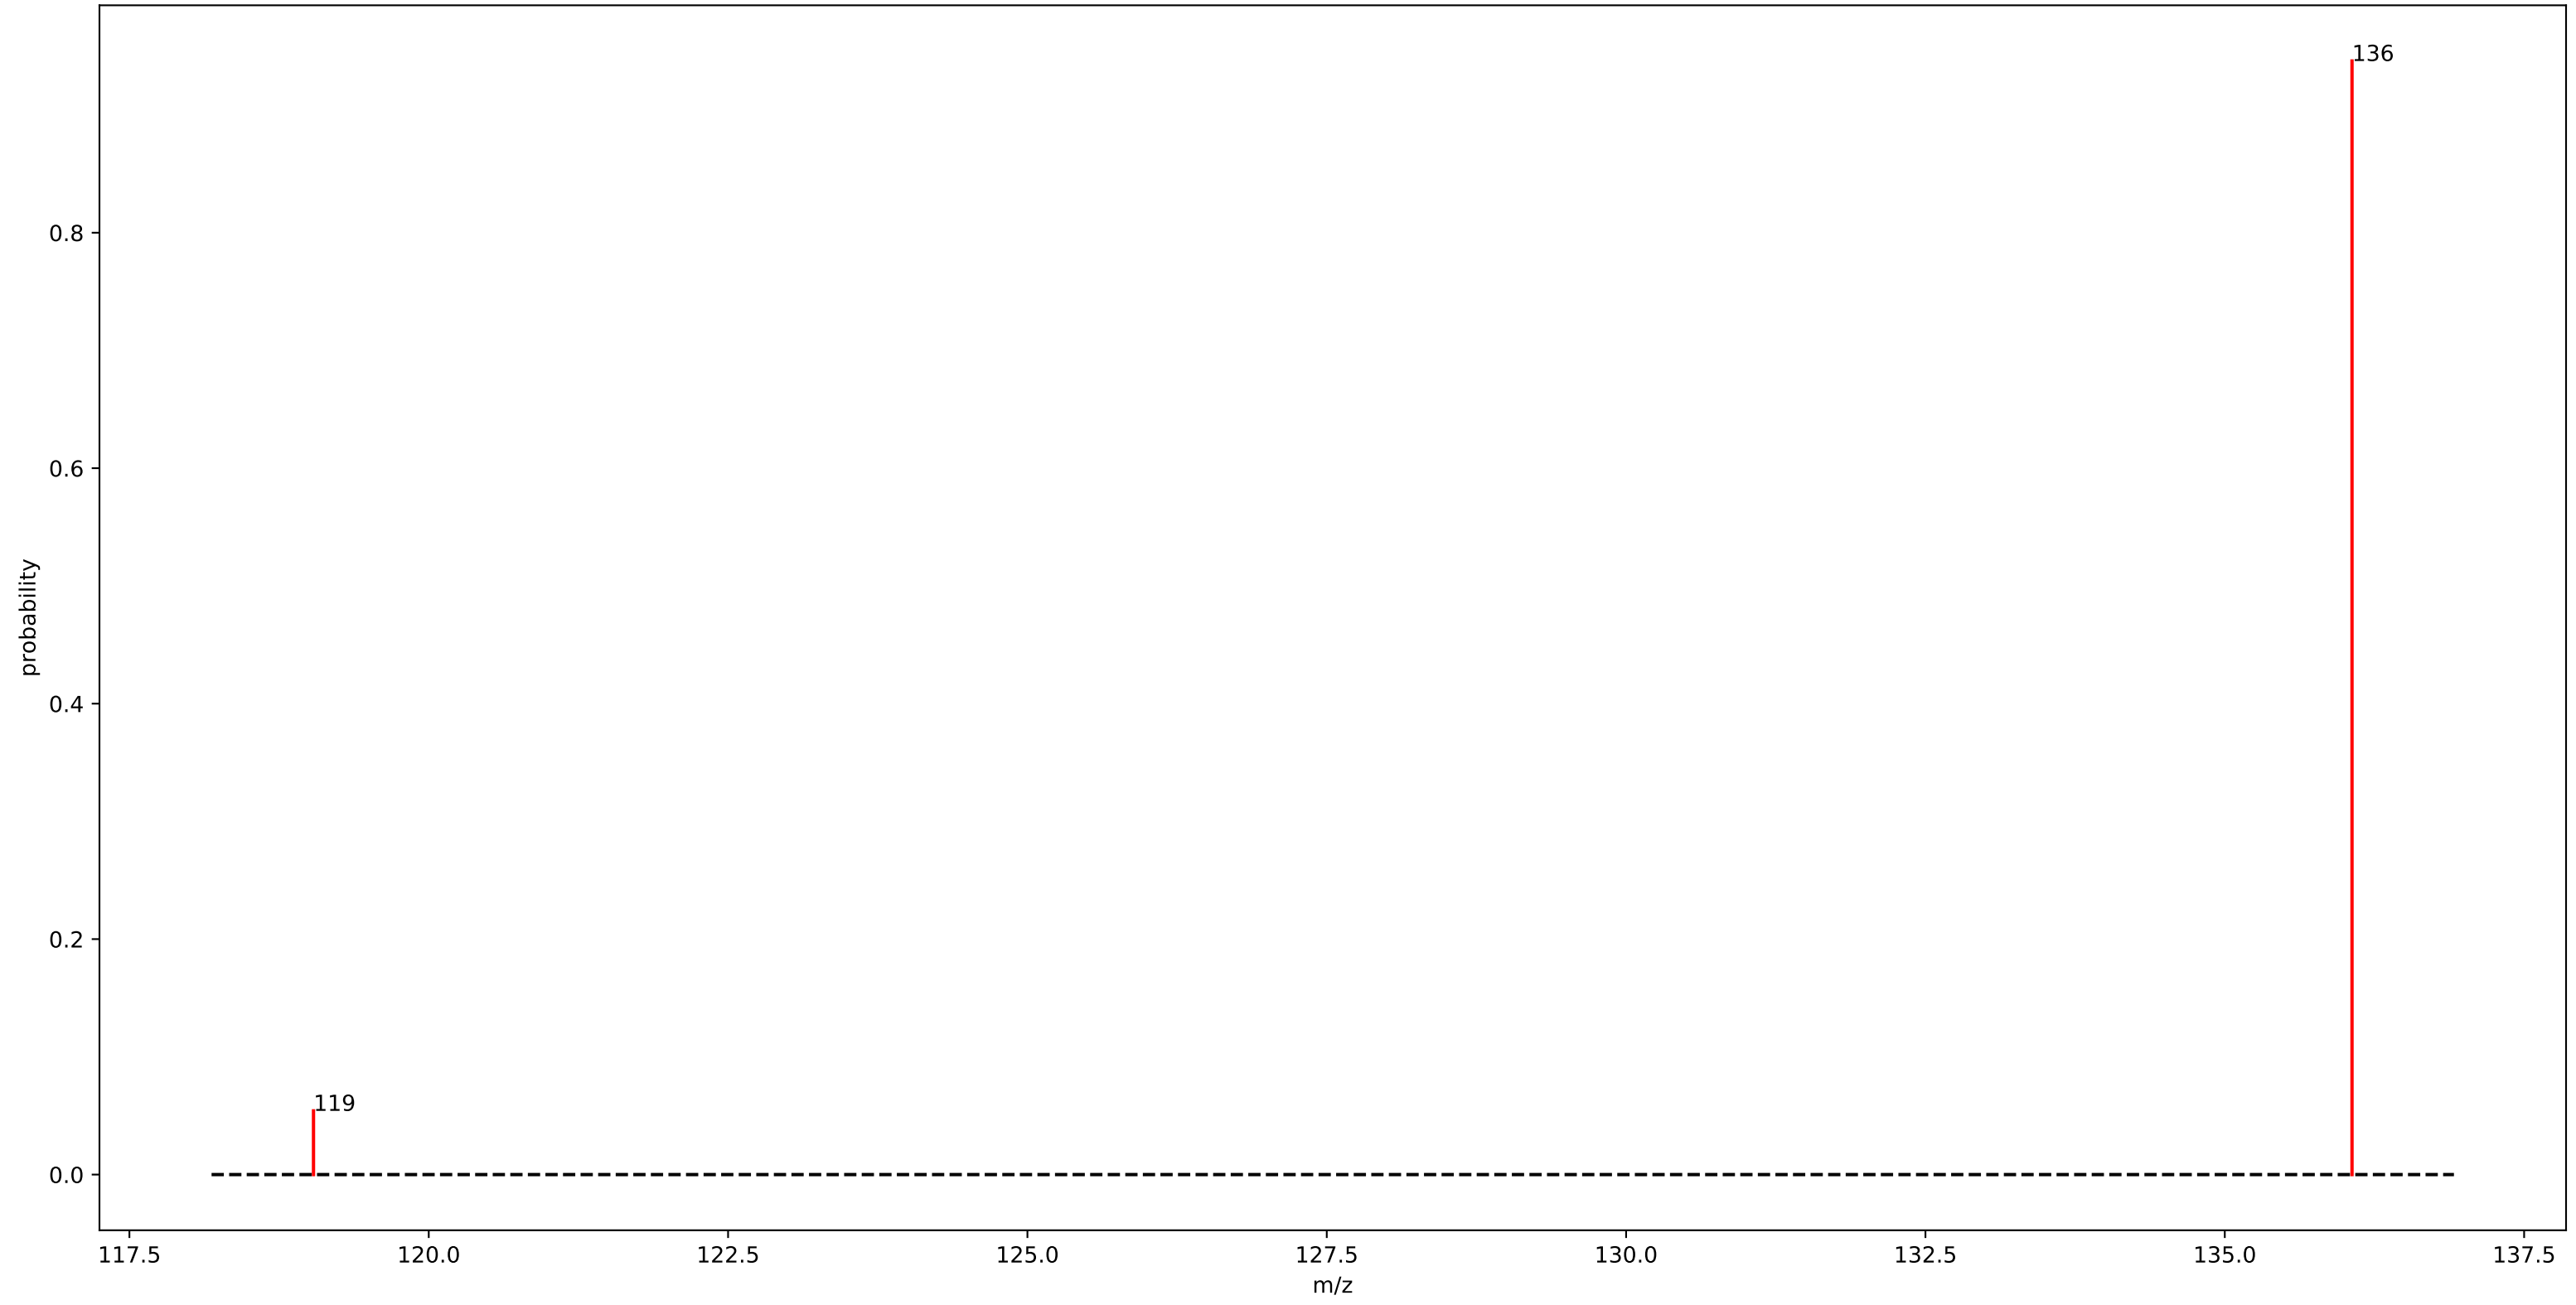

# gnps\_motif\_42.m2m

fragment\_136.0625 : 0.95  
fragment\_119.0375 : 0.05

gnps\_motif\_30.m2m

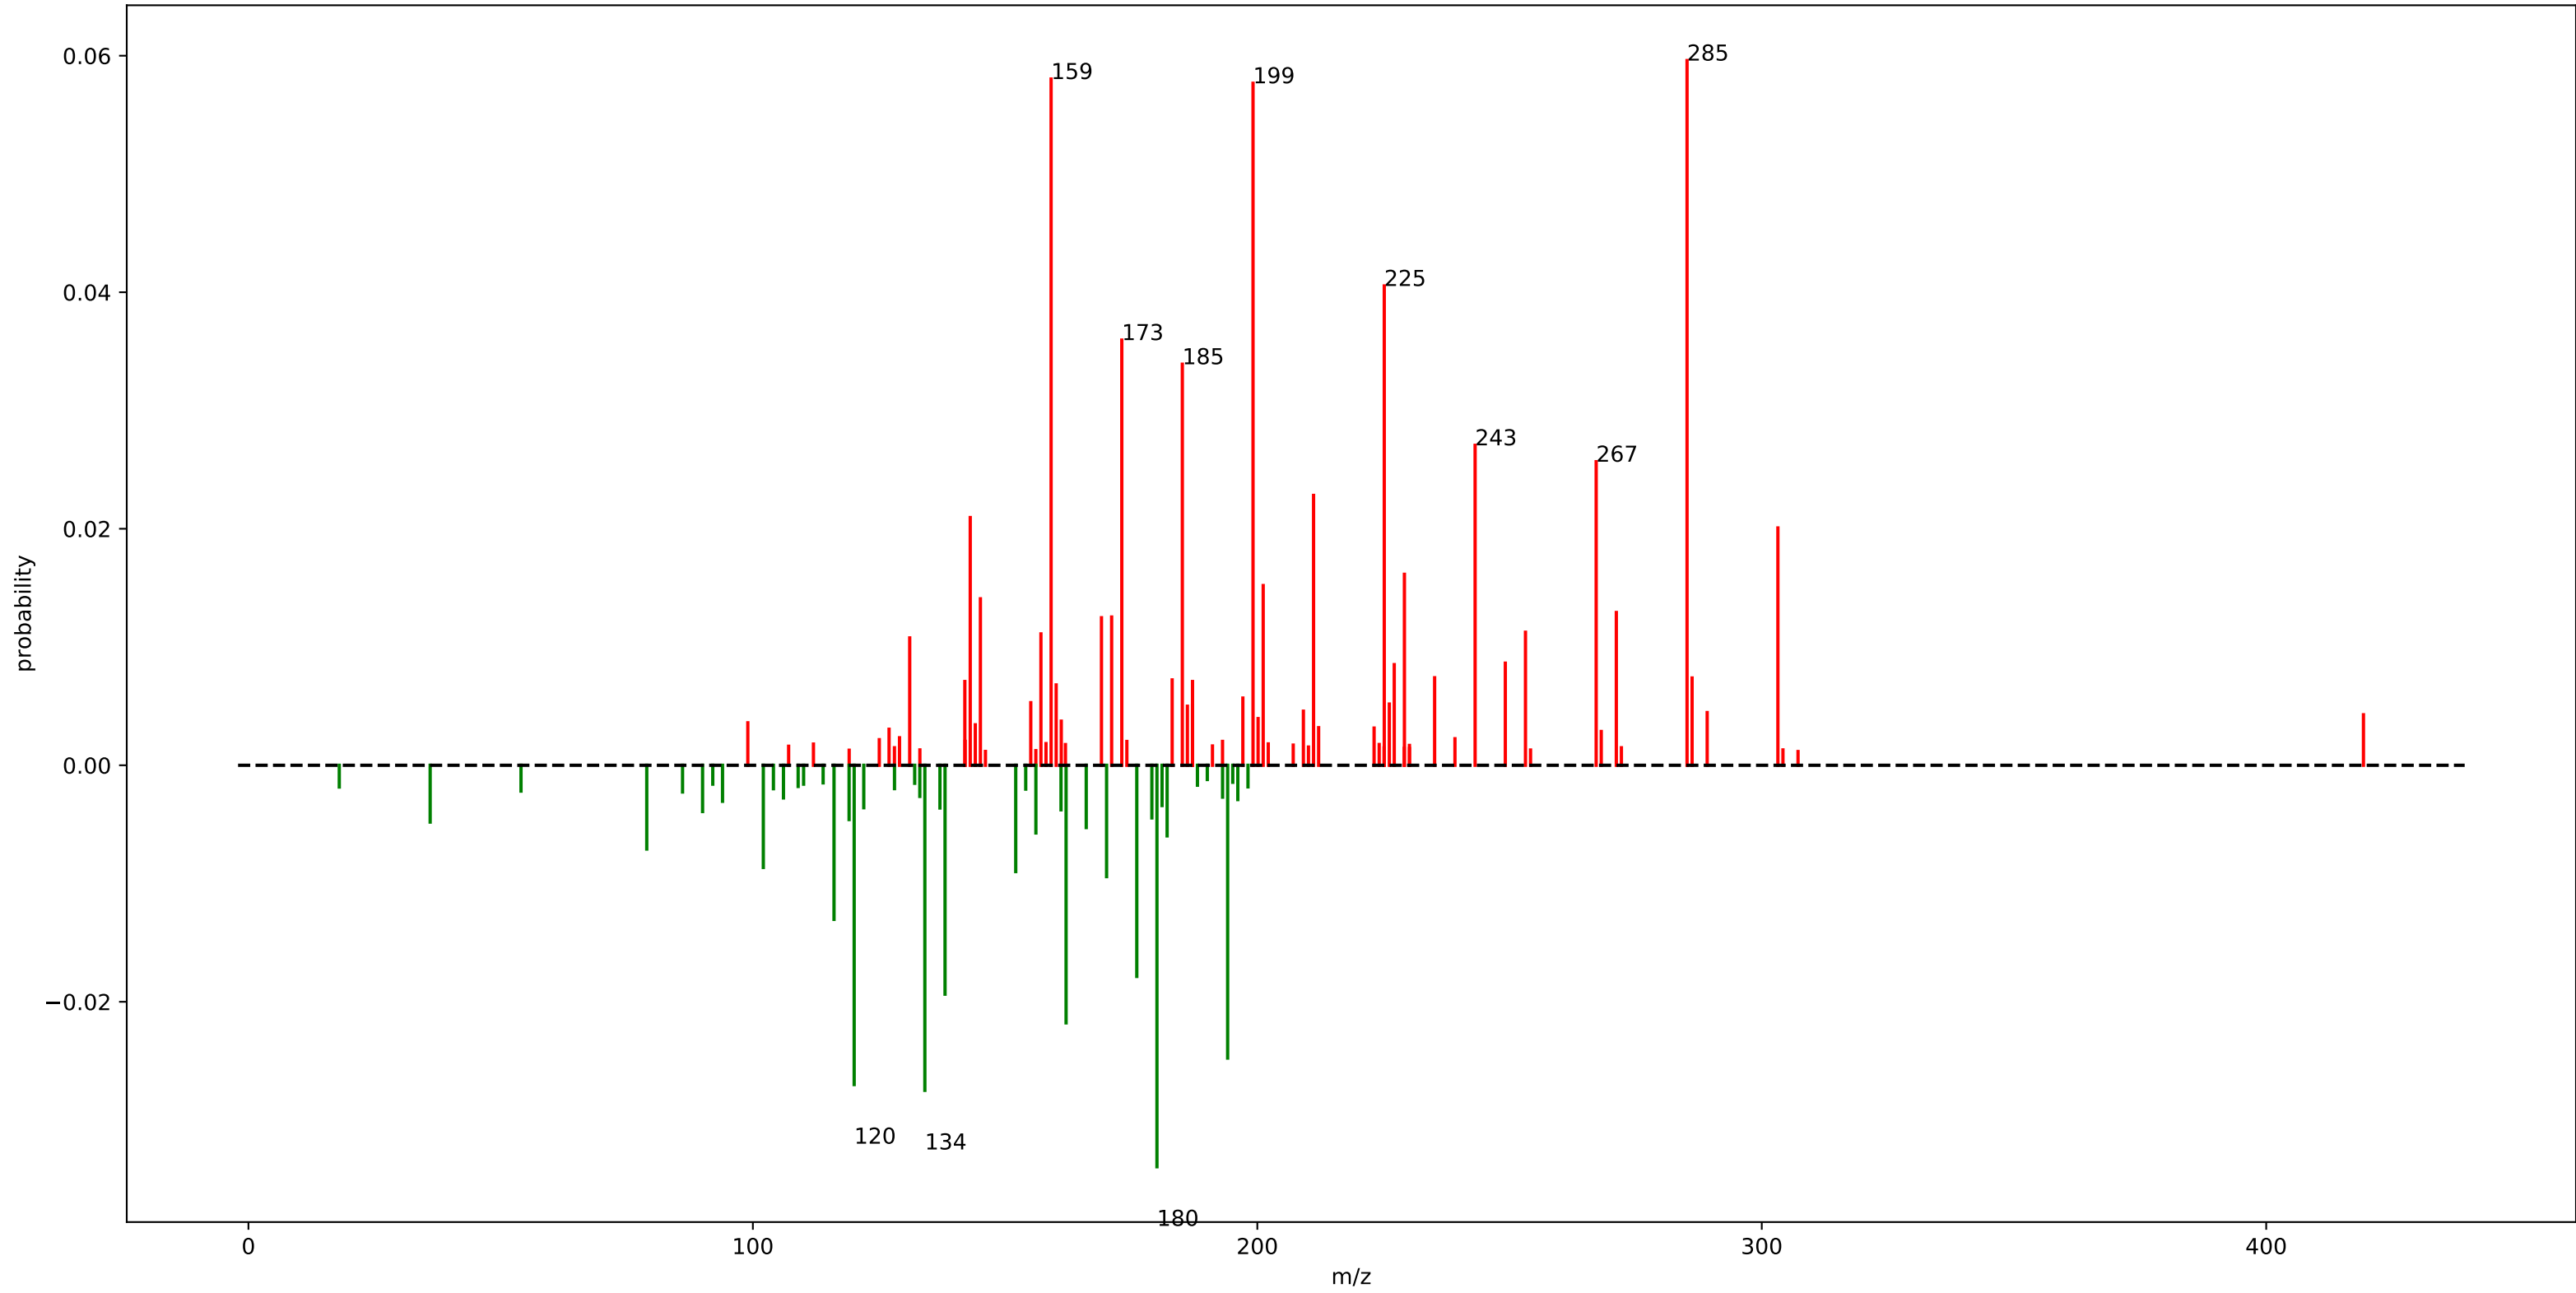

# gnps\_motif\_30.m2m

|                   |        |                   |        |                   |        |
|-------------------|--------|-------------------|--------|-------------------|--------|
| fragment_285.1875 | : 0.06 | fragment_145.1025 | : 0.01 | loss_182.1175     | : 0.01 |
| fragment_159.1175 | : 0.06 | loss_116.0825     | : 0.01 | loss_156.1025     | : 0.01 |
| fragment_199.1475 | : 0.06 | fragment_271.1675 | : 0.01 | fragment_197.1325 | : 0.01 |
| fragment_225.1625 | : 0.04 | fragment_171.1175 | : 0.01 | fragment_155.0875 | : 0.01 |
| fragment_173.1325 | : 0.04 | fragment_169.1025 | : 0.01 | loss_166.0825     | : 0.01 |
| loss_180.1025     | : 0.03 | fragment_253.1575 | : 0.01 | fragment_226.1675 | : 0.01 |
| fragment_185.1325 | : 0.03 | fragment_157.1025 | : 0.01 | fragment_187.1475 | : 0.01 |
| loss_134.0925     | : 0.03 | fragment_131.0875 | : 0.01 |                   |        |
| fragment_243.1725 | : 0.03 | loss_170.1175     | : 0.01 |                   |        |
| loss_120.0775     | : 0.03 | loss_152.1075     | : 0.01 |                   |        |
| fragment_267.1725 | : 0.03 | loss_102.0675     | : 0.01 |                   |        |
| loss_194.1175     | : 0.02 | fragment_249.1625 | : 0.01 |                   |        |
| fragment_211.1475 | : 0.02 | fragment_227.1425 | : 0.01 |                   |        |
| loss_162.0875     | : 0.02 | fragment_235.1475 | : 0.01 |                   |        |
| fragment_143.0875 | : 0.02 | fragment_286.1875 | : 0.01 |                   |        |
| fragment_303.1975 | : 0.02 | fragment_183.1175 | : 0.01 |                   |        |
| loss_138.0925     | : 0.02 | loss_78.9625      | : 0.01 |                   |        |
| loss_176.1075     | : 0.02 | fragment_142.0175 | : 0.01 |                   |        |
| fragment_229.1575 | : 0.02 | fragment_187.1525 | : 0.01 |                   |        |
| fragment_201.1625 | : 0.02 | fragment_160.1225 | : 0.01 |                   |        |

rhabdus\_motif\_245.m2m

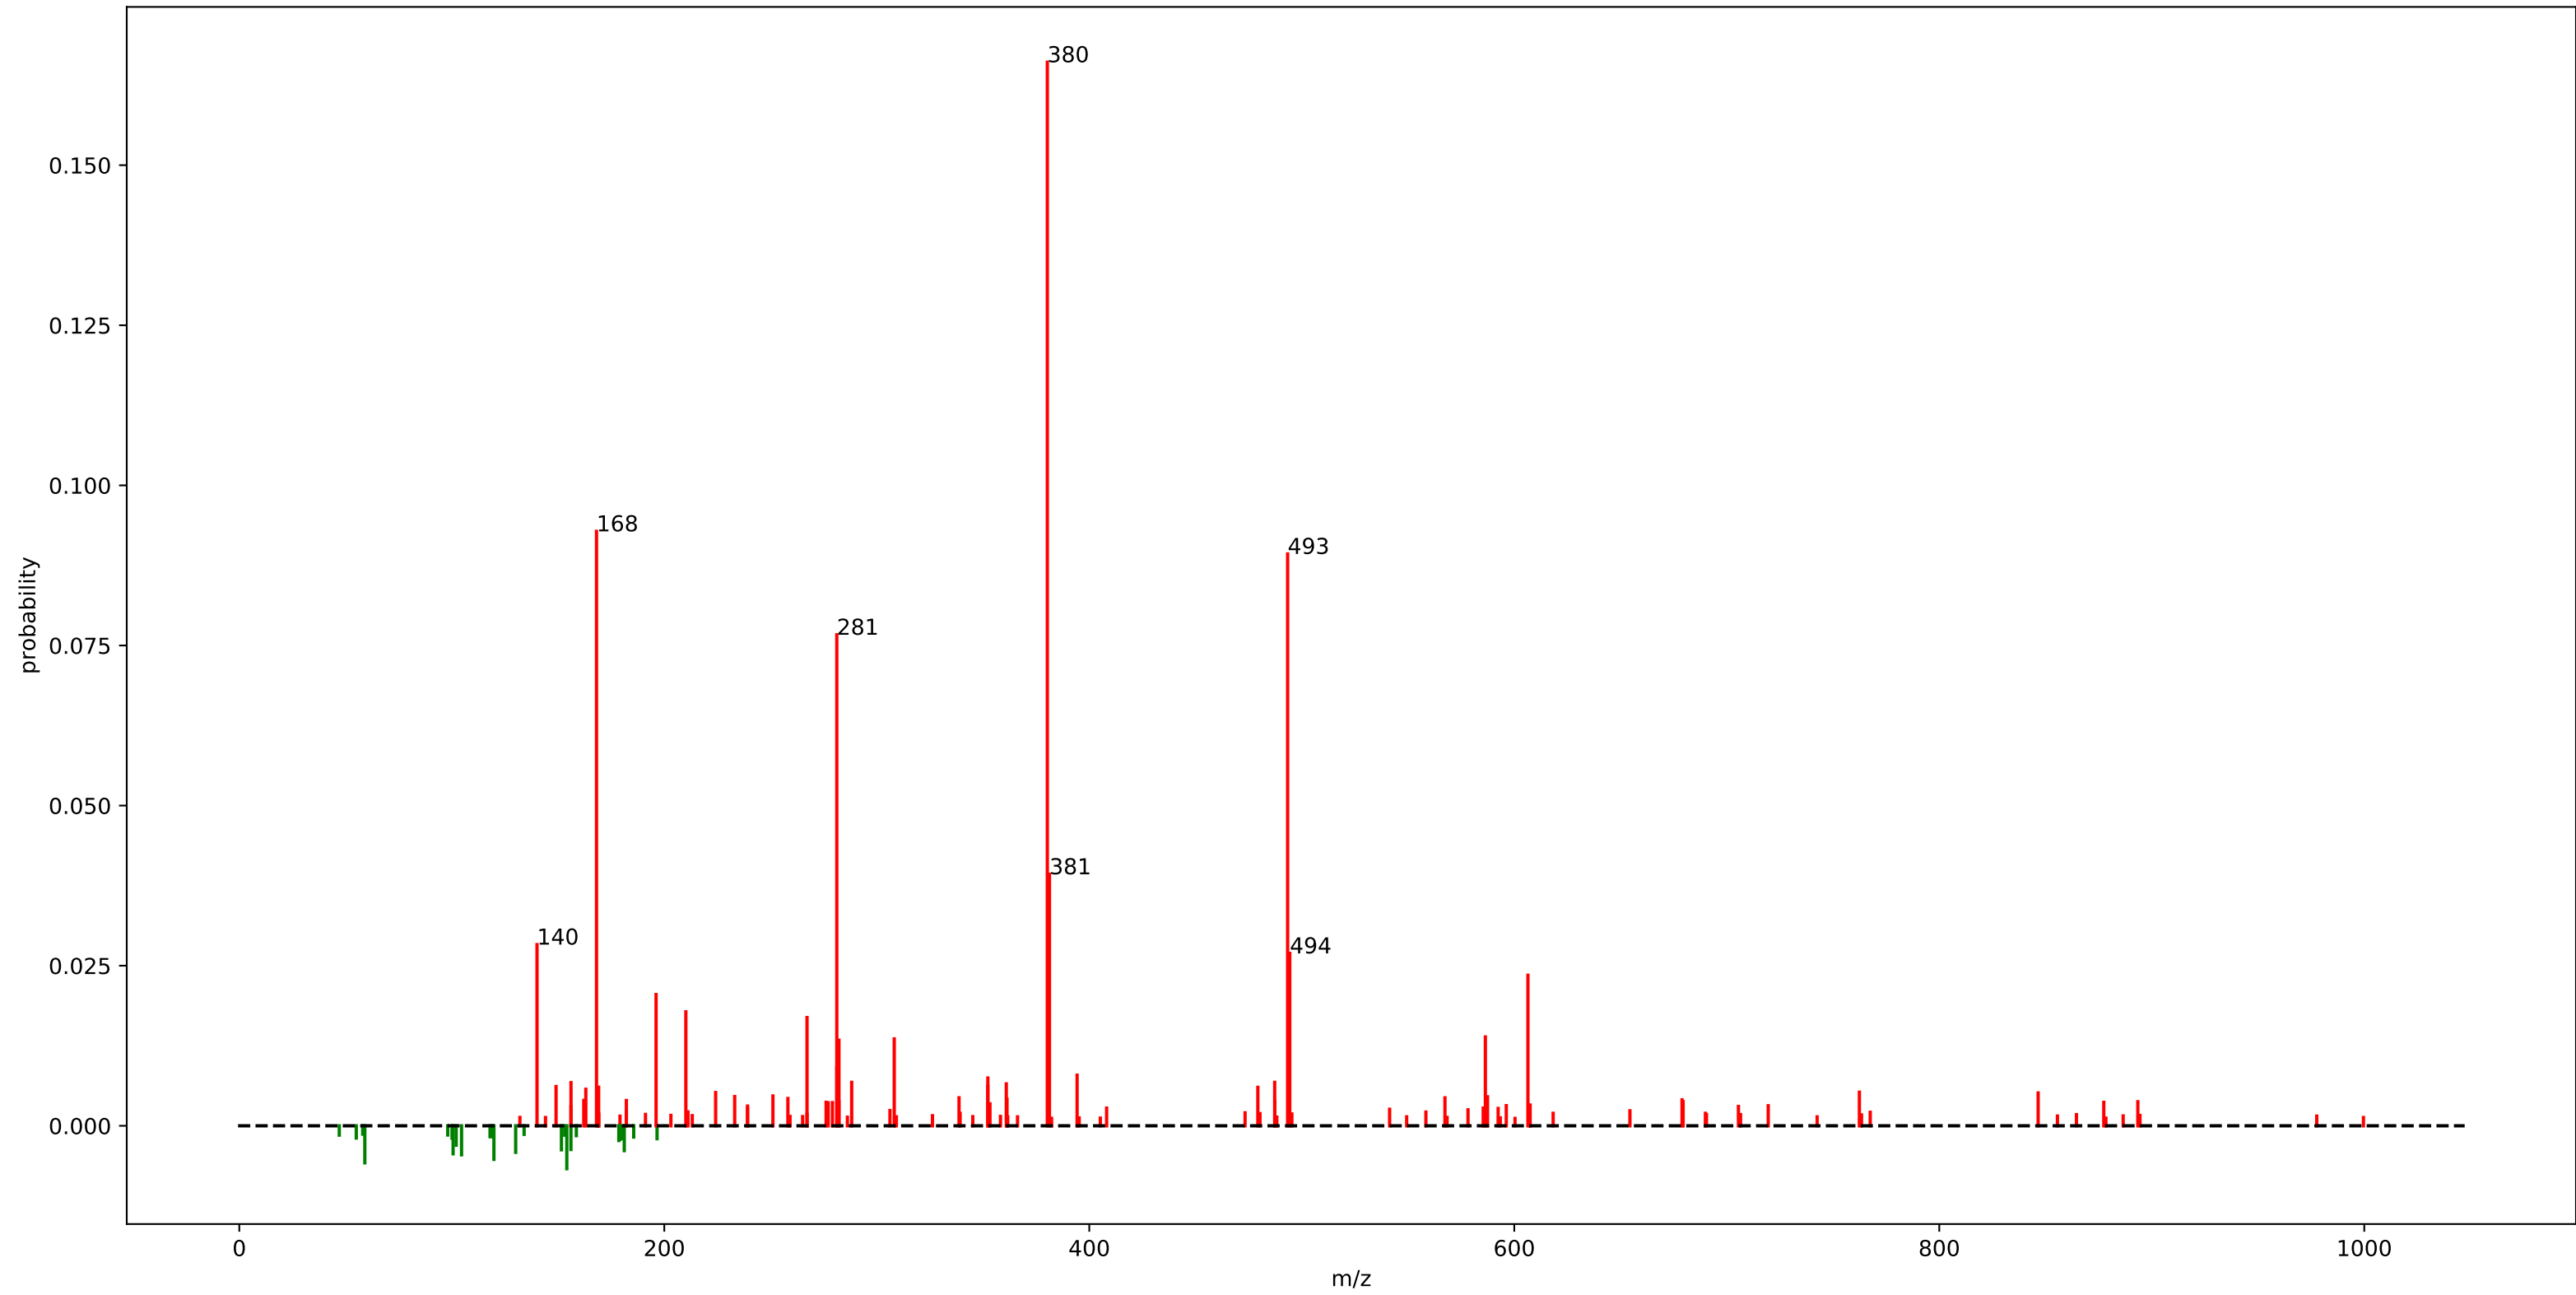

# rhabdus\_motif\_245.m2m

|                   |        |                   |        |
|-------------------|--------|-------------------|--------|
| fragment_380.2525 | : 0.17 | loss_154.1275     | : 0.01 |
| fragment_168.1025 | : 0.09 | fragment_360.9475 | : 0.01 |
| fragment_493.3375 | : 0.09 | fragment_352.2575 | : 0.01 |
| fragment_281.1875 | : 0.08 | fragment_149.0725 | : 0.01 |
| fragment_381.2575 | : 0.04 | fragment_169.1025 | : 0.01 |
| fragment_140.1075 | : 0.03 | fragment_479.3225 | : 0.01 |
| fragment_494.3425 | : 0.03 | loss_59.0725      | : 0.01 |
| fragment_606.4225 | : 0.02 | fragment_163.0725 | : 0.01 |
| fragment_196.1325 | : 0.02 | loss_119.8275     | : 0.01 |
| fragment_210.1475 | : 0.02 | fragment_762.4025 | : 0.01 |
| fragment_267.1725 | : 0.02 | fragment_224.1725 | : 0.01 |
| fragment_586.3975 | : 0.01 | fragment_846.5325 | : 0.01 |
| fragment_308.2125 | : 0.01 |                   |        |
| fragment_282.1875 | : 0.01 |                   |        |
| fragment_281.1825 | : 0.01 |                   |        |
| fragment_394.2675 | : 0.01 |                   |        |
| fragment_352.2625 | : 0.01 |                   |        |
| fragment_487.2525 | : 0.01 |                   |        |
| fragment_288.1925 | : 0.01 |                   |        |
| fragment_156.0975 | : 0.01 |                   |        |



rhamn\_motif\_34.m2m

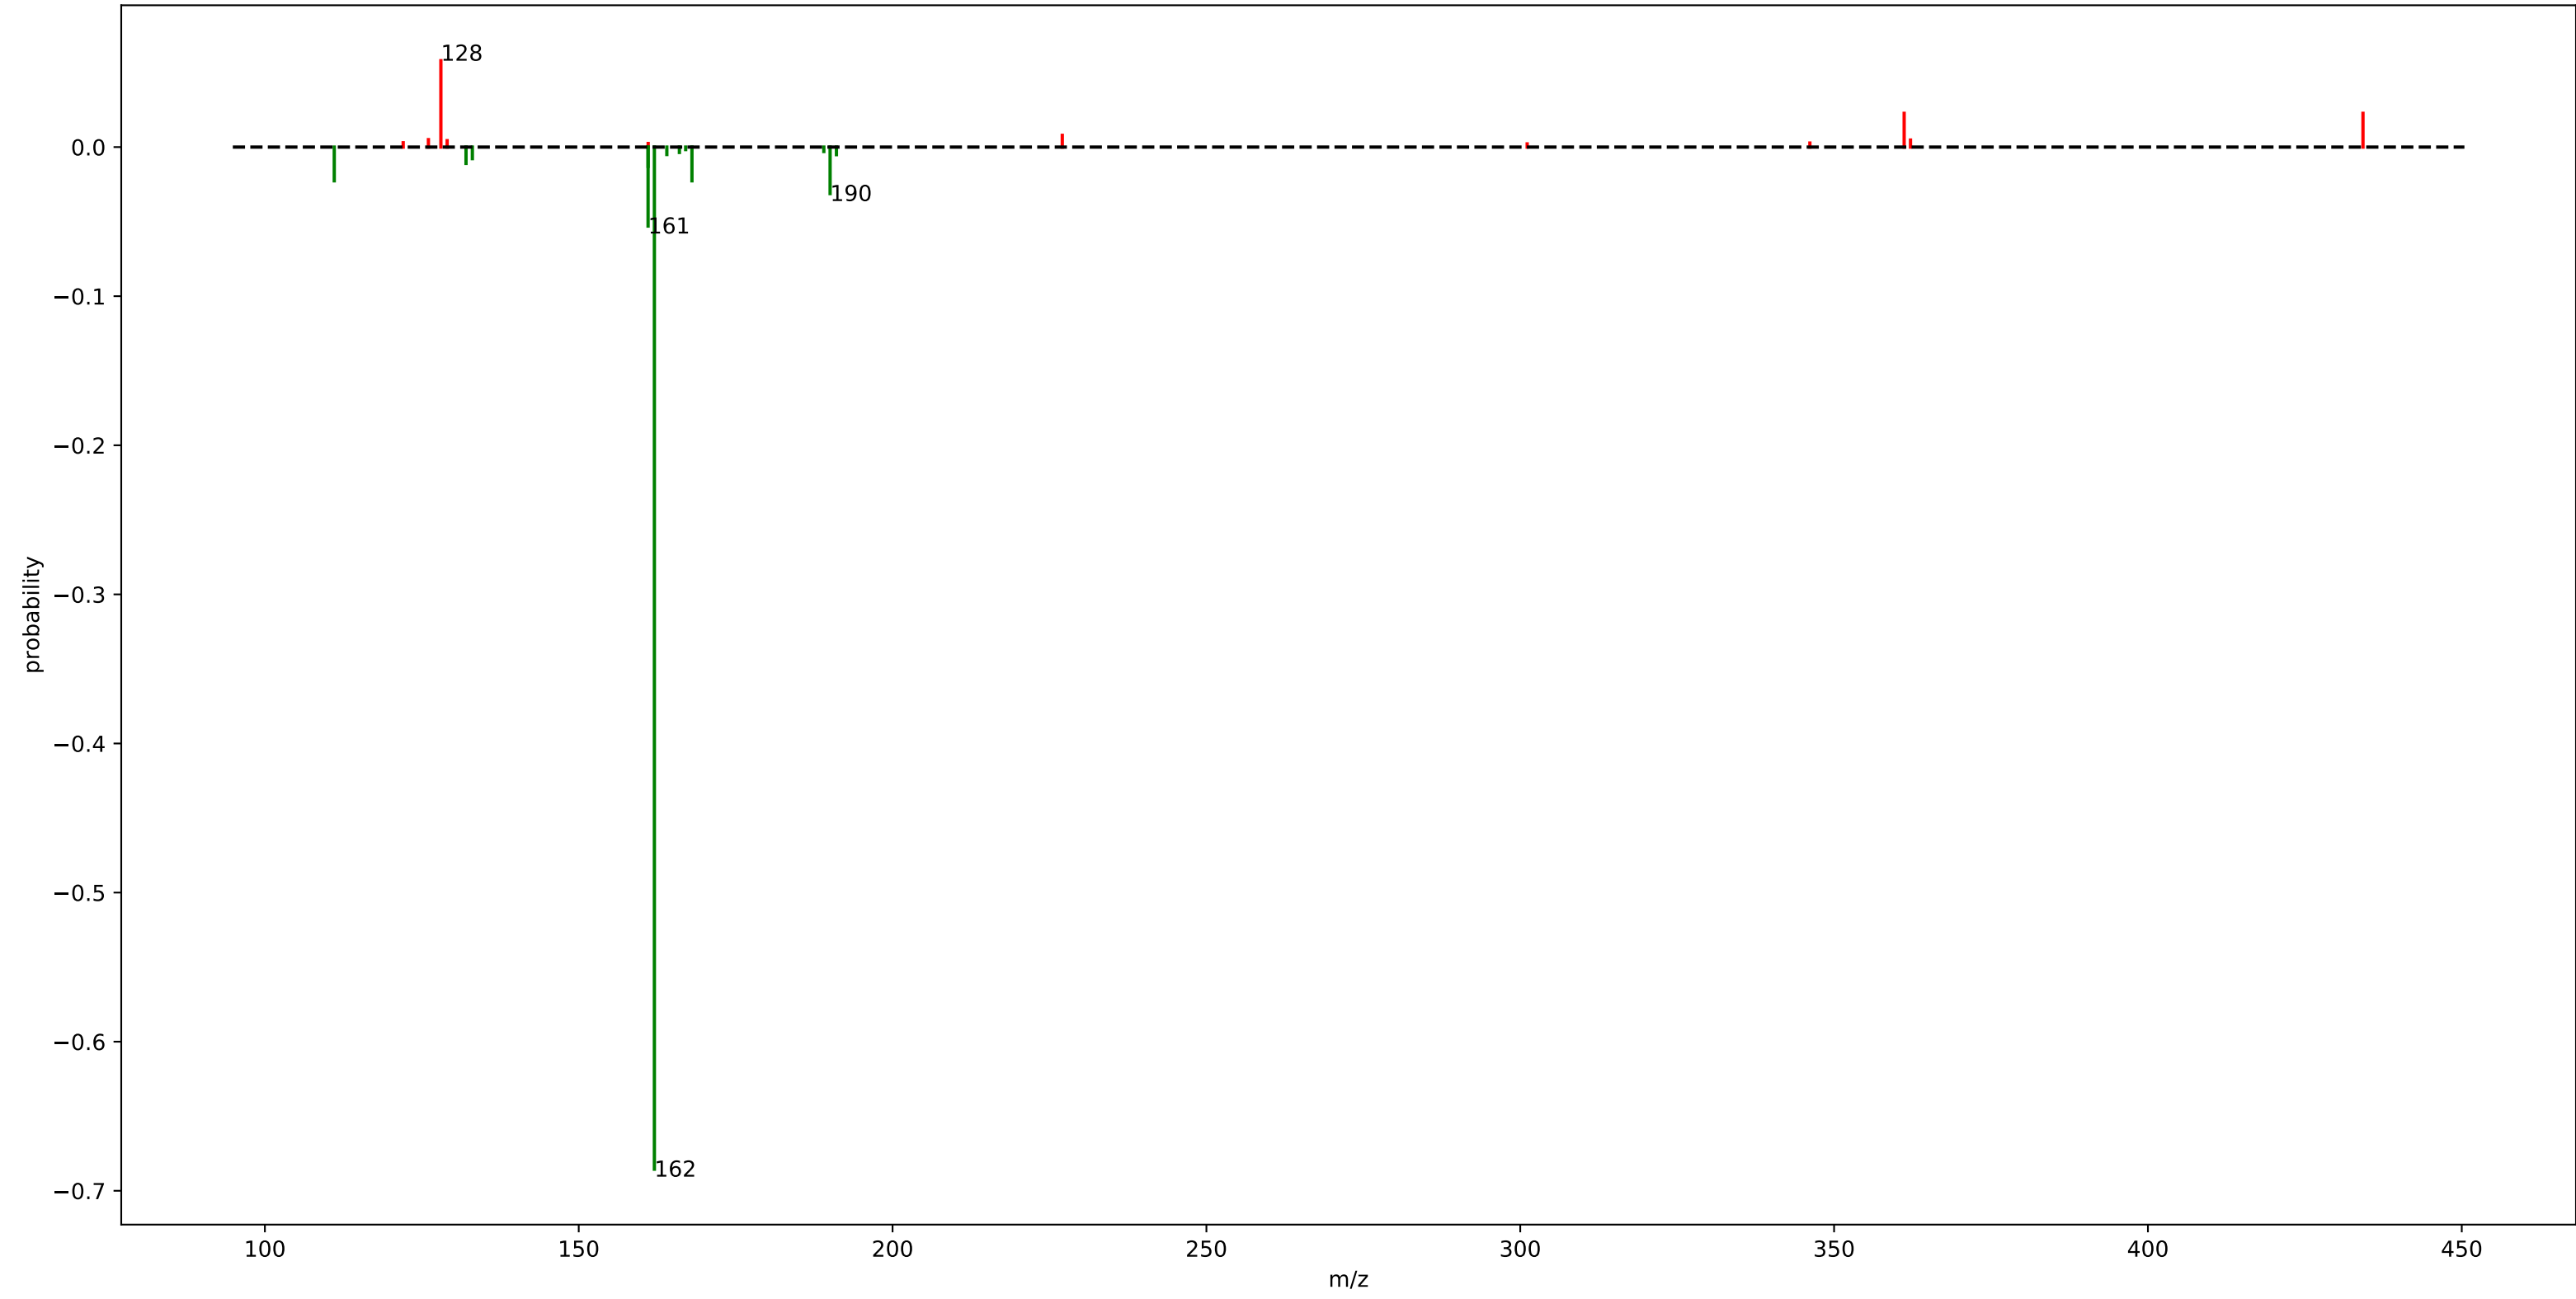

## rhamn\_motif\_34.m2m

|                   |        |
|-------------------|--------|
| loss_162.0525     | : 0.69 |
| fragment_128.0375 | : 0.06 |
| loss_161.0475     | : 0.05 |
| loss_190.0475     | : 0.03 |
| loss_111.0525     | : 0.02 |
| fragment_434.2625 | : 0.02 |
| fragment_361.1625 | : 0.02 |
| loss_168.0375     | : 0.02 |
| loss_161.0525     | : 0.01 |
| loss_132.0425     | : 0.01 |
| fragment_227.0375 | : 0.01 |
| loss_133.0525     | : 0.01 |
| loss_191.0575     | : 0.01 |

rhabdus\_motif\_72.m2m

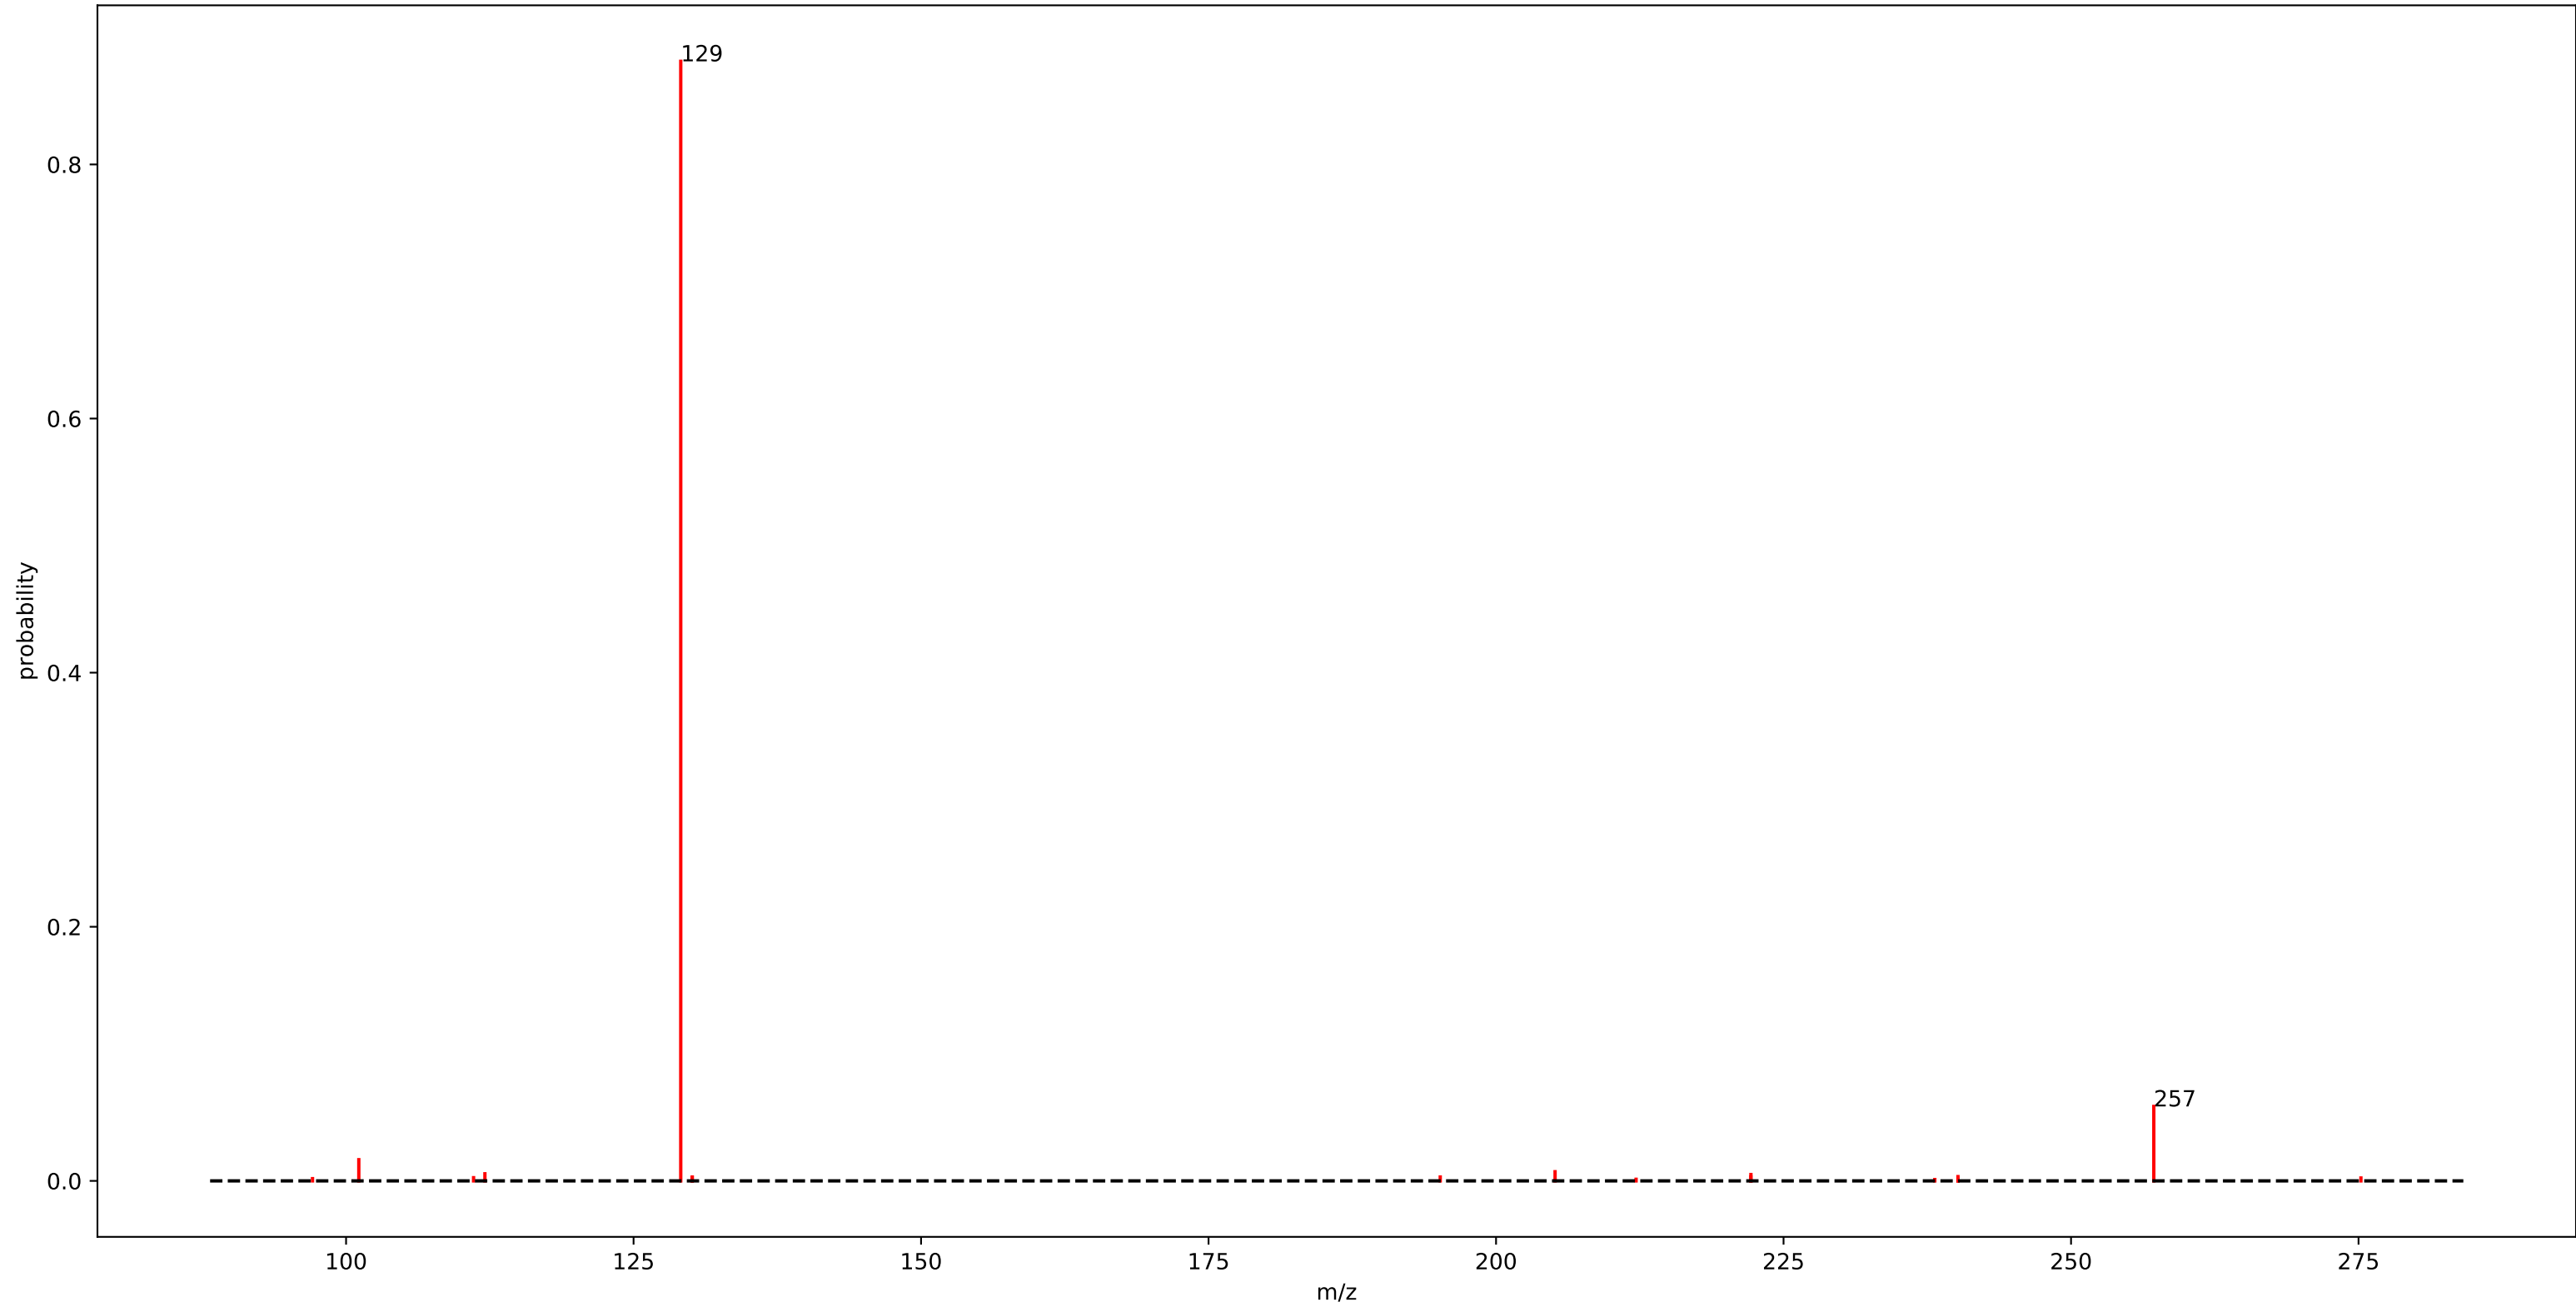

## rhabdus\_motif\_72.m2m

|                   |        |
|-------------------|--------|
| fragment_129.1025 | : 0.88 |
| fragment_257.1975 | : 0.06 |
| fragment_101.1075 | : 0.02 |
| fragment_205.1325 | : 0.01 |
| fragment_112.0725 | : 0.01 |
| fragment_222.1625 | : 0.01 |

gnps\_motif\_39.m2m

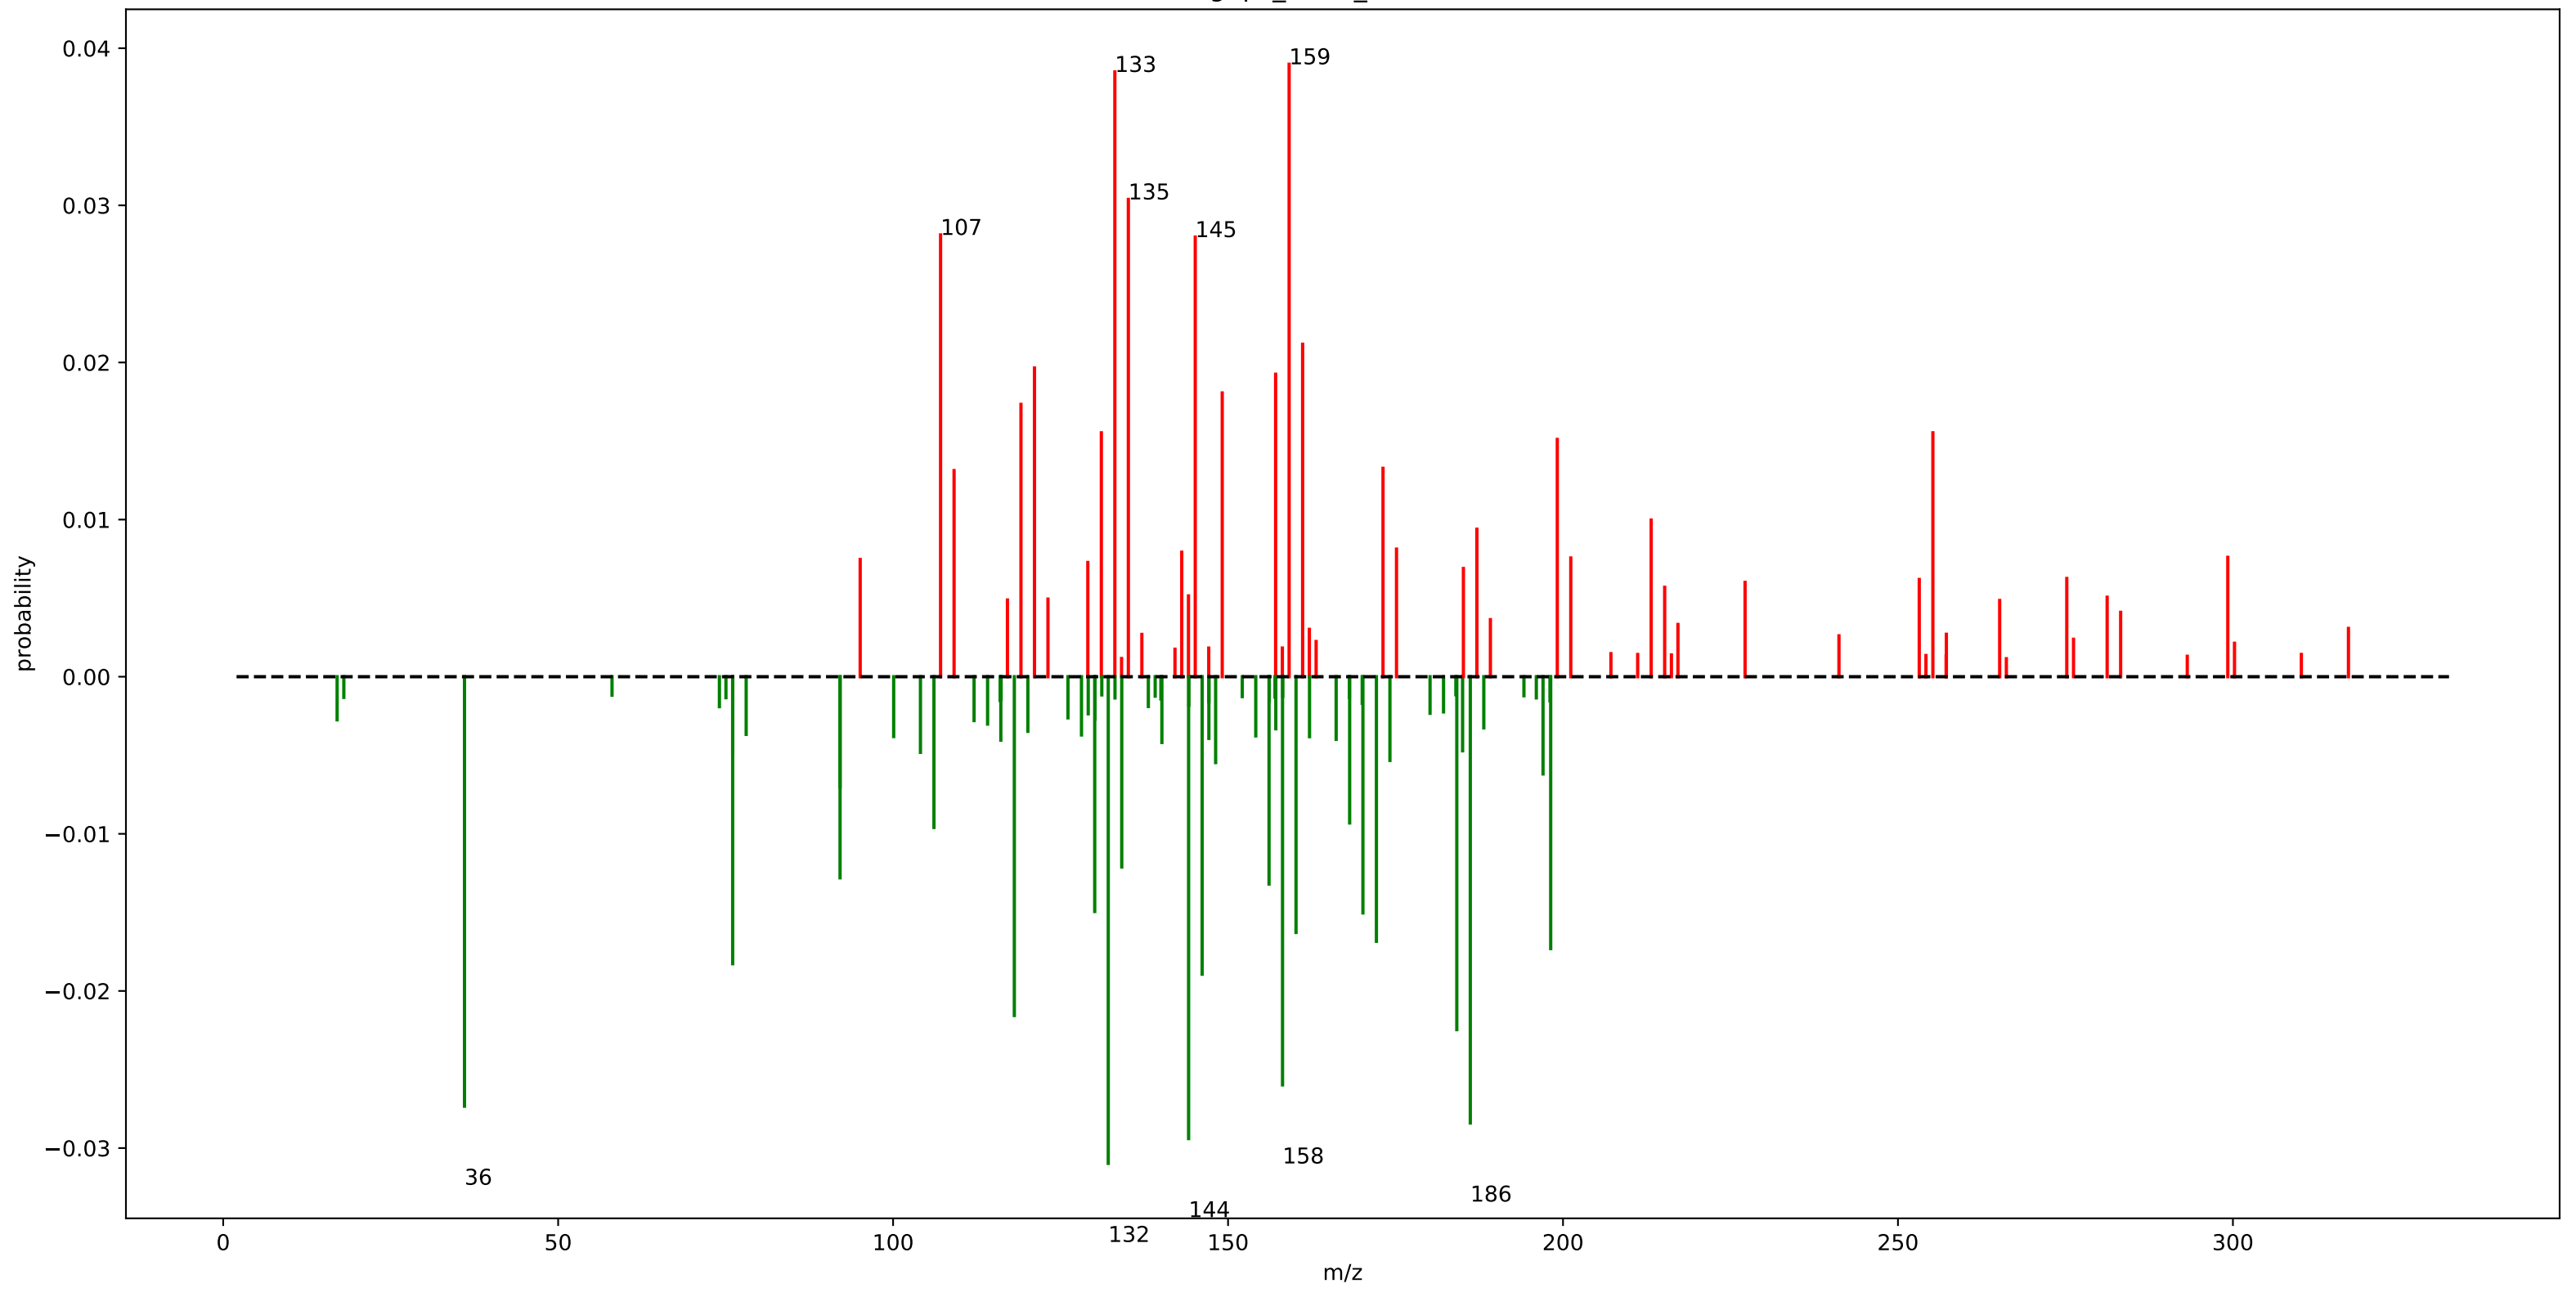

# gnps\_motif\_39.m2m

|                   |        |                   |        |                   |        |
|-------------------|--------|-------------------|--------|-------------------|--------|
| fragment_159.1175 | : 0.04 | loss_172.1475     | : 0.02 | fragment_95.0875  | : 0.01 |
| fragment_133.1025 | : 0.04 | loss_160.1475     | : 0.02 | fragment_129.0675 | : 0.01 |
| loss_132.1175     | : 0.03 | fragment_255.2125 | : 0.02 | loss_92.0875      | : 0.01 |
| fragment_135.1175 | : 0.03 | fragment_131.0875 | : 0.02 | fragment_185.1325 | : 0.01 |
| loss_144.1125     | : 0.03 | fragment_199.1475 | : 0.02 | fragment_275.2025 | : 0.01 |
| loss_186.1625     | : 0.03 | loss_170.1325     | : 0.02 | loss_197.0175     | : 0.01 |
| fragment_107.0875 | : 0.03 | loss_130.0975     | : 0.01 | fragment_253.1775 | : 0.01 |
| fragment_145.1025 | : 0.03 | fragment_173.1325 | : 0.01 | fragment_227.1775 | : 0.01 |
| loss_36.0225      | : 0.03 | loss_156.1175     | : 0.01 | fragment_215.1775 | : 0.01 |
| loss_158.1325     | : 0.03 | fragment_109.1025 | : 0.01 | loss_148.1475     | : 0.01 |
| loss_184.1475     | : 0.02 | loss_92.0825      | : 0.01 | loss_174.1625     | : 0.01 |
| loss_118.0975     | : 0.02 | loss_134.1325     | : 0.01 | fragment_144.0925 | : 0.01 |
| fragment_161.1325 | : 0.02 | fragment_213.1625 | : 0.01 | fragment_281.2275 | : 0.01 |
| fragment_121.1025 | : 0.02 | loss_106.0975     | : 0.01 |                   |        |
| fragment_157.1025 | : 0.02 | fragment_187.1475 | : 0.01 |                   |        |
| loss_146.1325     | : 0.02 | loss_168.1525     | : 0.01 |                   |        |
| loss_76.0525      | : 0.02 | fragment_175.1475 | : 0.01 |                   |        |
| fragment_149.1325 | : 0.02 | fragment_143.0875 | : 0.01 |                   |        |
| fragment_119.0875 | : 0.02 | fragment_299.2375 | : 0.01 |                   |        |
| loss_198.1625     | : 0.02 | fragment_201.1625 | : 0.01 |                   |        |

gnps\_motif\_63.m2m

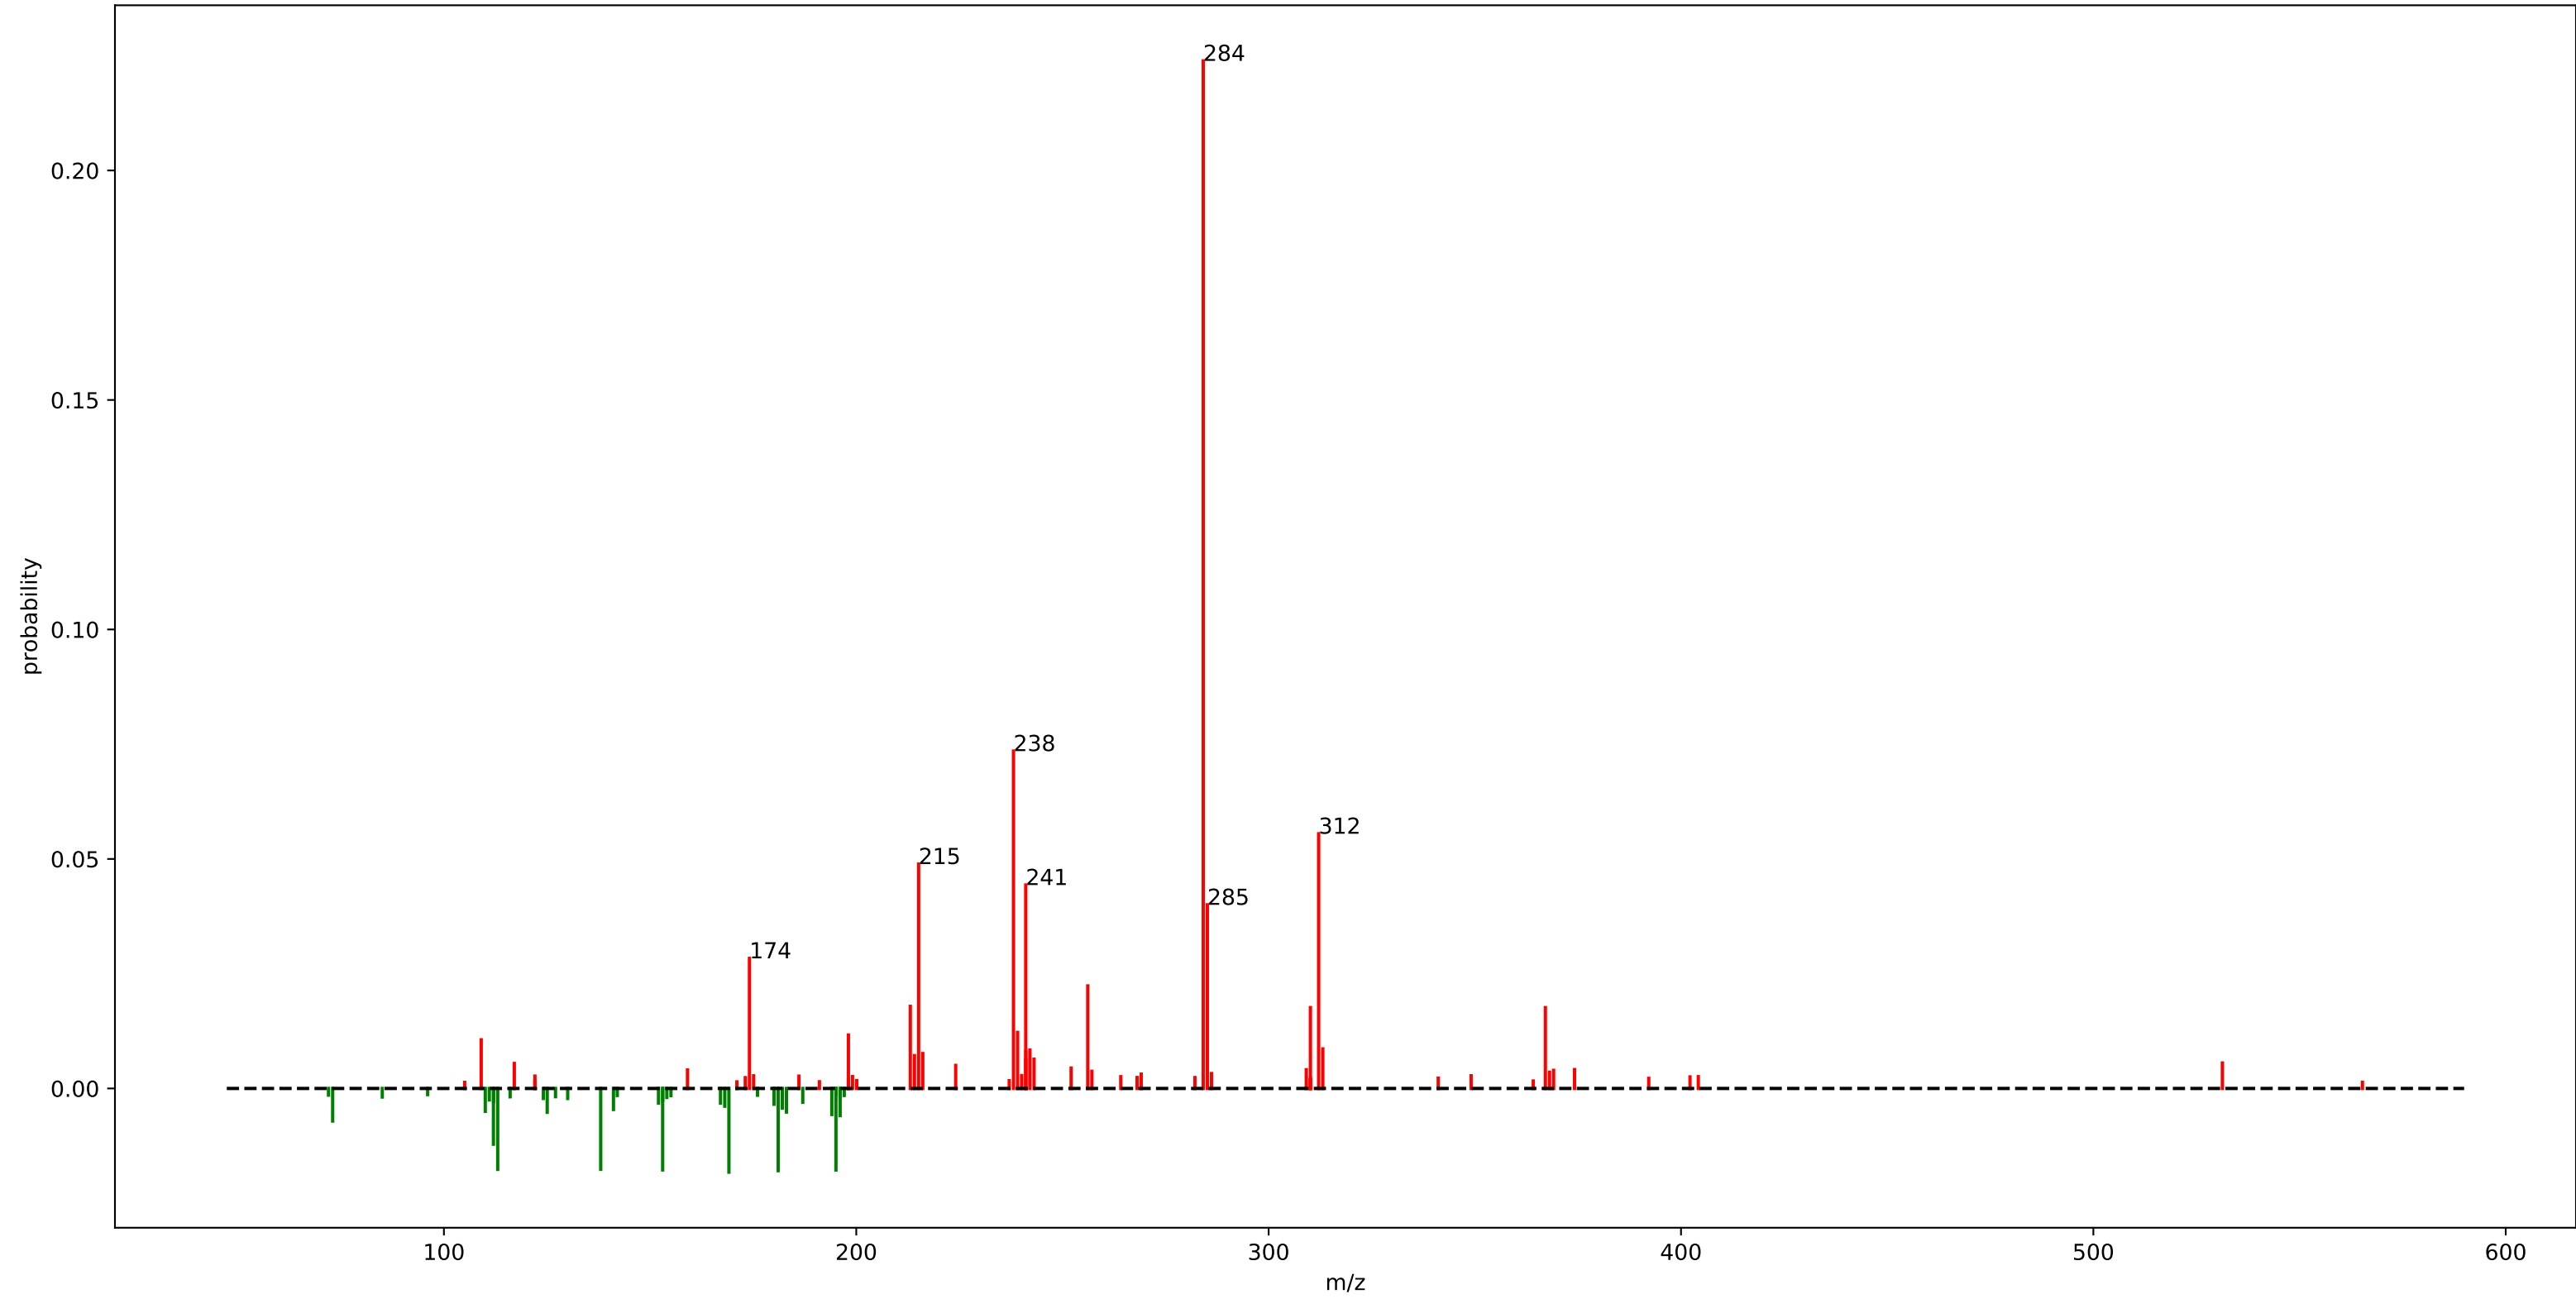

## gnps\_motif\_63.m2m

|                   |        |                   |        |
|-------------------|--------|-------------------|--------|
| fragment_284.1375 | : 0.22 | fragment_109.0425 | : 0.01 |
| fragment_238.1225 | : 0.07 | fragment_313.1375 | : 0.01 |
| fragment_312.1325 | : 0.06 | fragment_242.0975 | : 0.01 |
| fragment_215.1175 | : 0.05 | fragment_241.1325 | : 0.01 |
| fragment_241.0975 | : 0.04 | fragment_216.1225 | : 0.01 |
| fragment_285.1425 | : 0.04 | fragment_214.1075 | : 0.01 |
| fragment_174.0925 | : 0.03 | loss_73.0175      | : 0.01 |
| fragment_256.1325 | : 0.02 | fragment_243.1125 | : 0.01 |
| loss_169.1125     | : 0.02 | fragment_241.1025 | : 0.01 |
| loss_181.0575     | : 0.02 | loss_196.0825     | : 0.01 |
| fragment_213.1025 | : 0.02 | loss_194.0675     | : 0.01 |
| loss_195.0675     | : 0.02 | fragment_531.2875 | : 0.01 |
| loss_153.0425     | : 0.02 | fragment_117.0675 | : 0.01 |
| loss_113.0475     | : 0.02 | loss_125.0475     | : 0.01 |
| loss_138.0225     | : 0.02 | loss_183.0675     | : 0.01 |
| fragment_367.1125 | : 0.02 | fragment_224.1075 | : 0.01 |
| fragment_310.1325 | : 0.02 |                   |        |
| fragment_239.1275 | : 0.01 |                   |        |
| loss_112.0075     | : 0.01 |                   |        |
| fragment_198.0925 | : 0.01 |                   |        |



urine\_mass2motif\_80.m2m

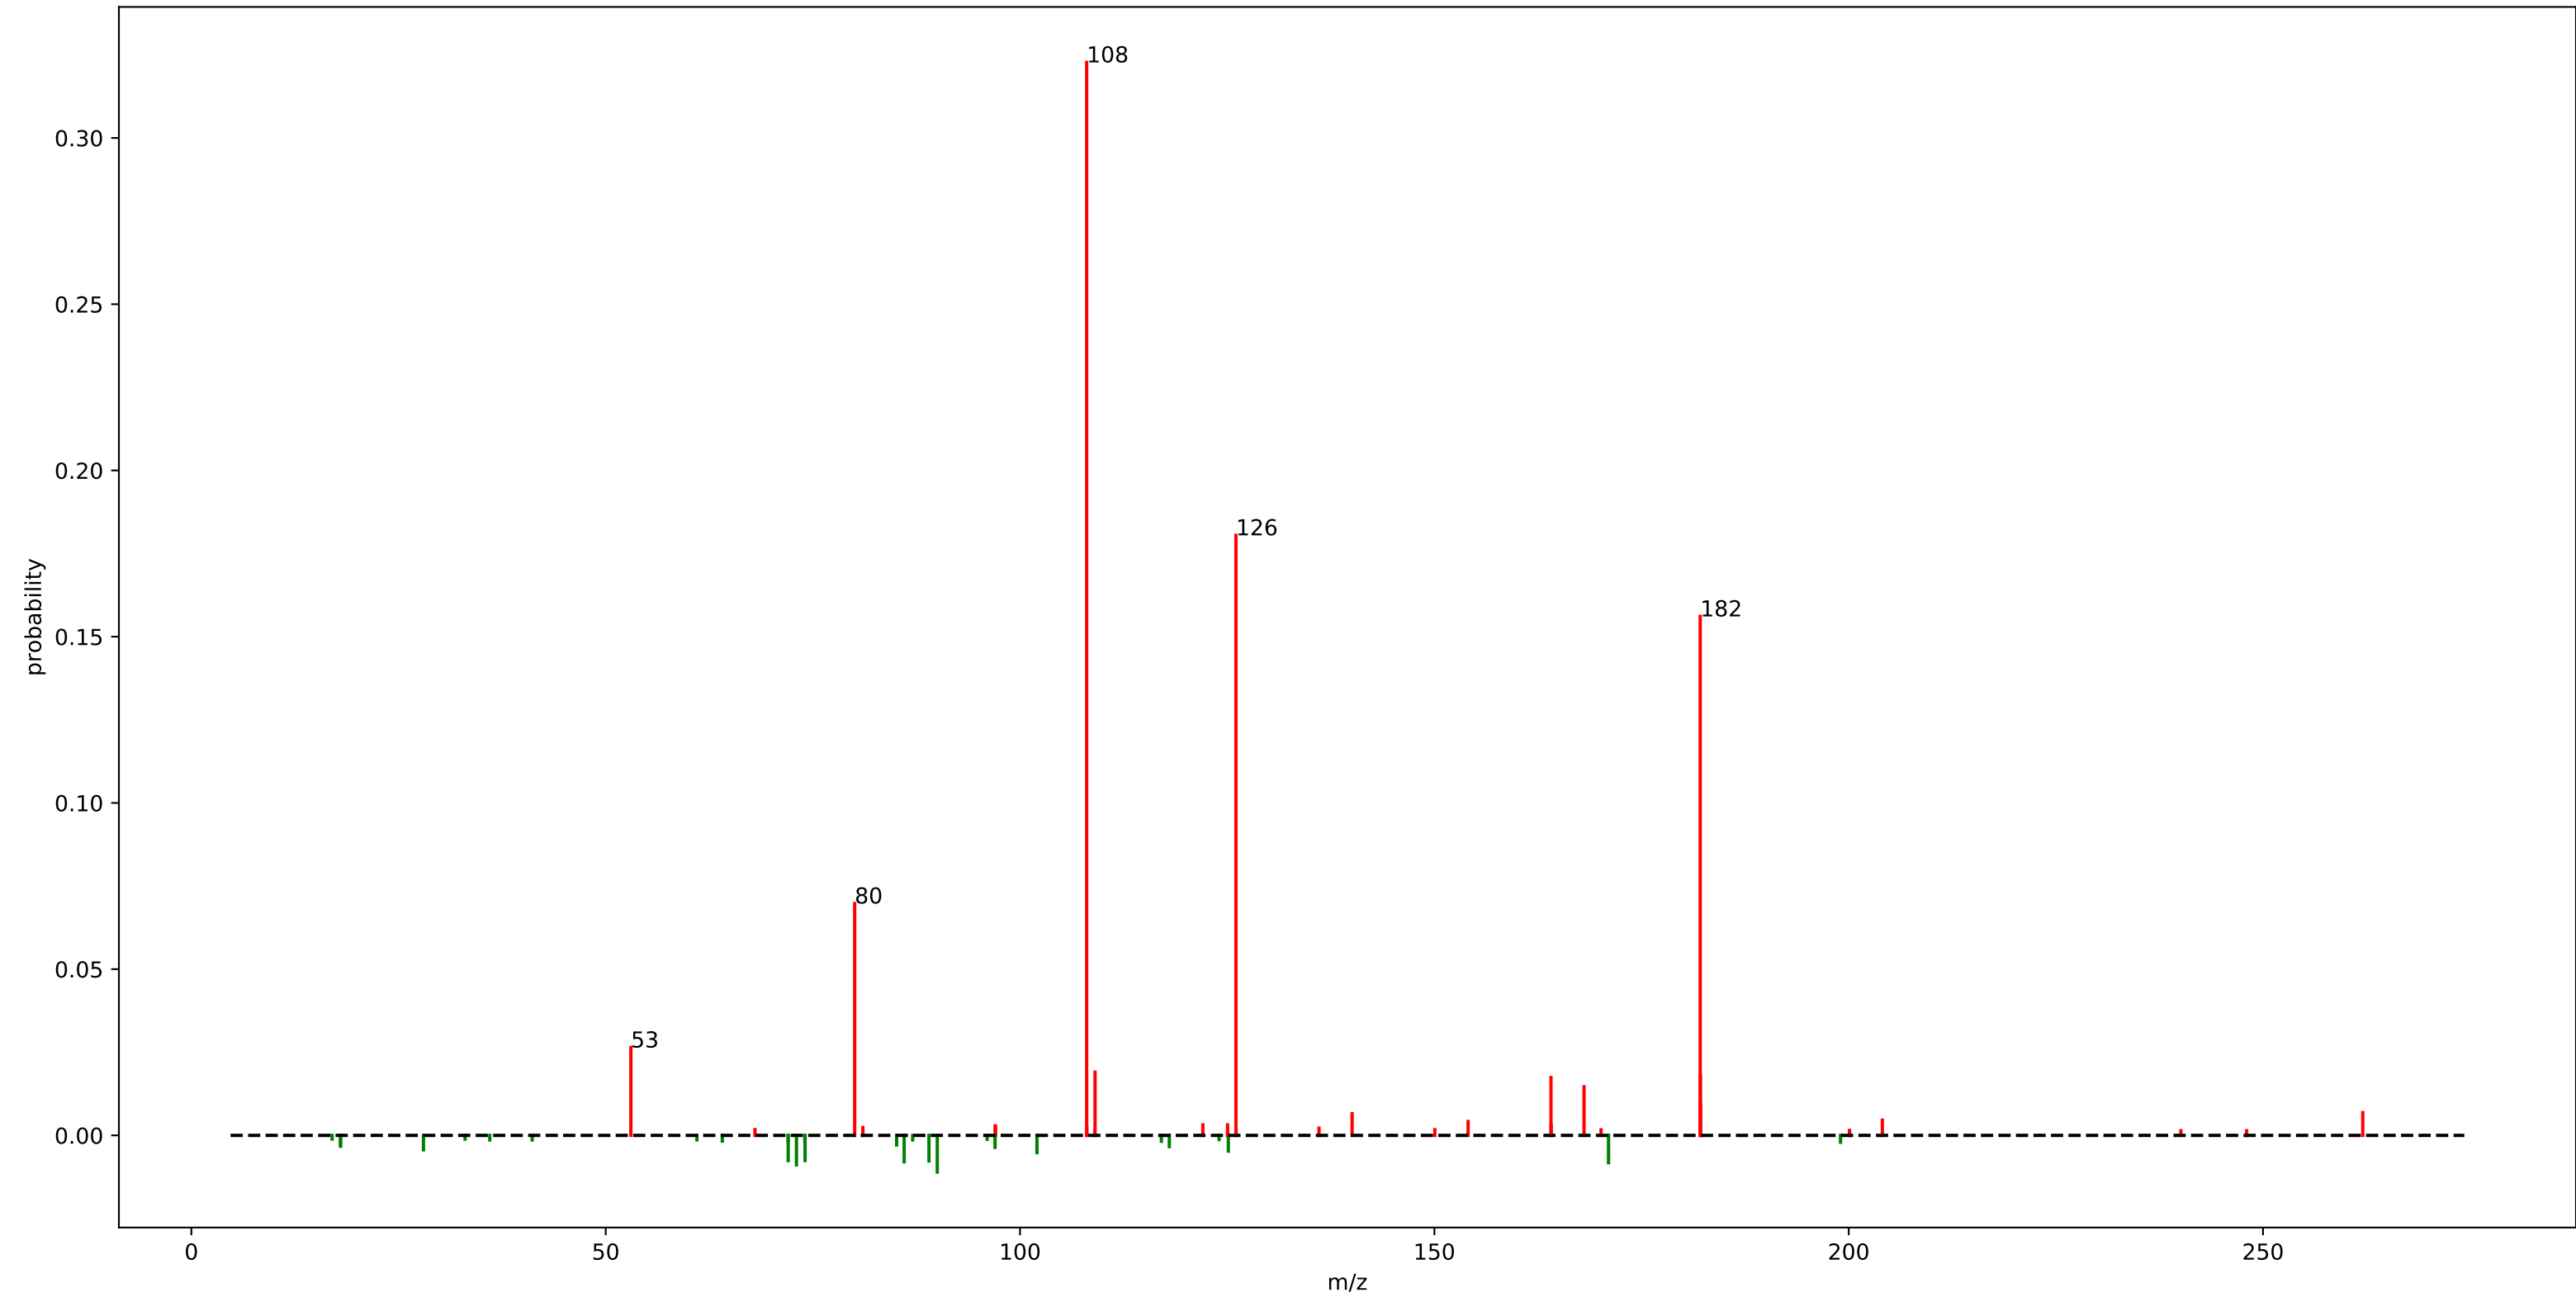

## urine\_mass2motif\_80.m2m

|                   |        |
|-------------------|--------|
| fragment_108.0425 | : 0.32 |
| fragment_126.0525 | : 0.18 |
| fragment_182.0825 | : 0.16 |
| fragment_80.0475  | : 0.07 |
| fragment_53.0375  | : 0.03 |
| fragment_109.0525 | : 0.02 |
| fragment_182.1025 | : 0.02 |
| fragment_164.0725 | : 0.02 |
| fragment_168.0625 | : 0.01 |
| loss_90.0125      | : 0.01 |
| fragment_182.1175 | : 0.01 |
| loss_73.0175      | : 0.01 |
| loss_171.0175     | : 0.01 |
| loss_86.0175      | : 0.01 |
| loss_89.0075      | : 0.01 |
| loss_74.0575      | : 0.01 |
| loss_72.0225      | : 0.01 |
| fragment_262.0375 | : 0.01 |
| fragment_140.0725 | : 0.01 |
| loss_102.0425     | : 0.01 |

gnps\_motif\_22.m2m

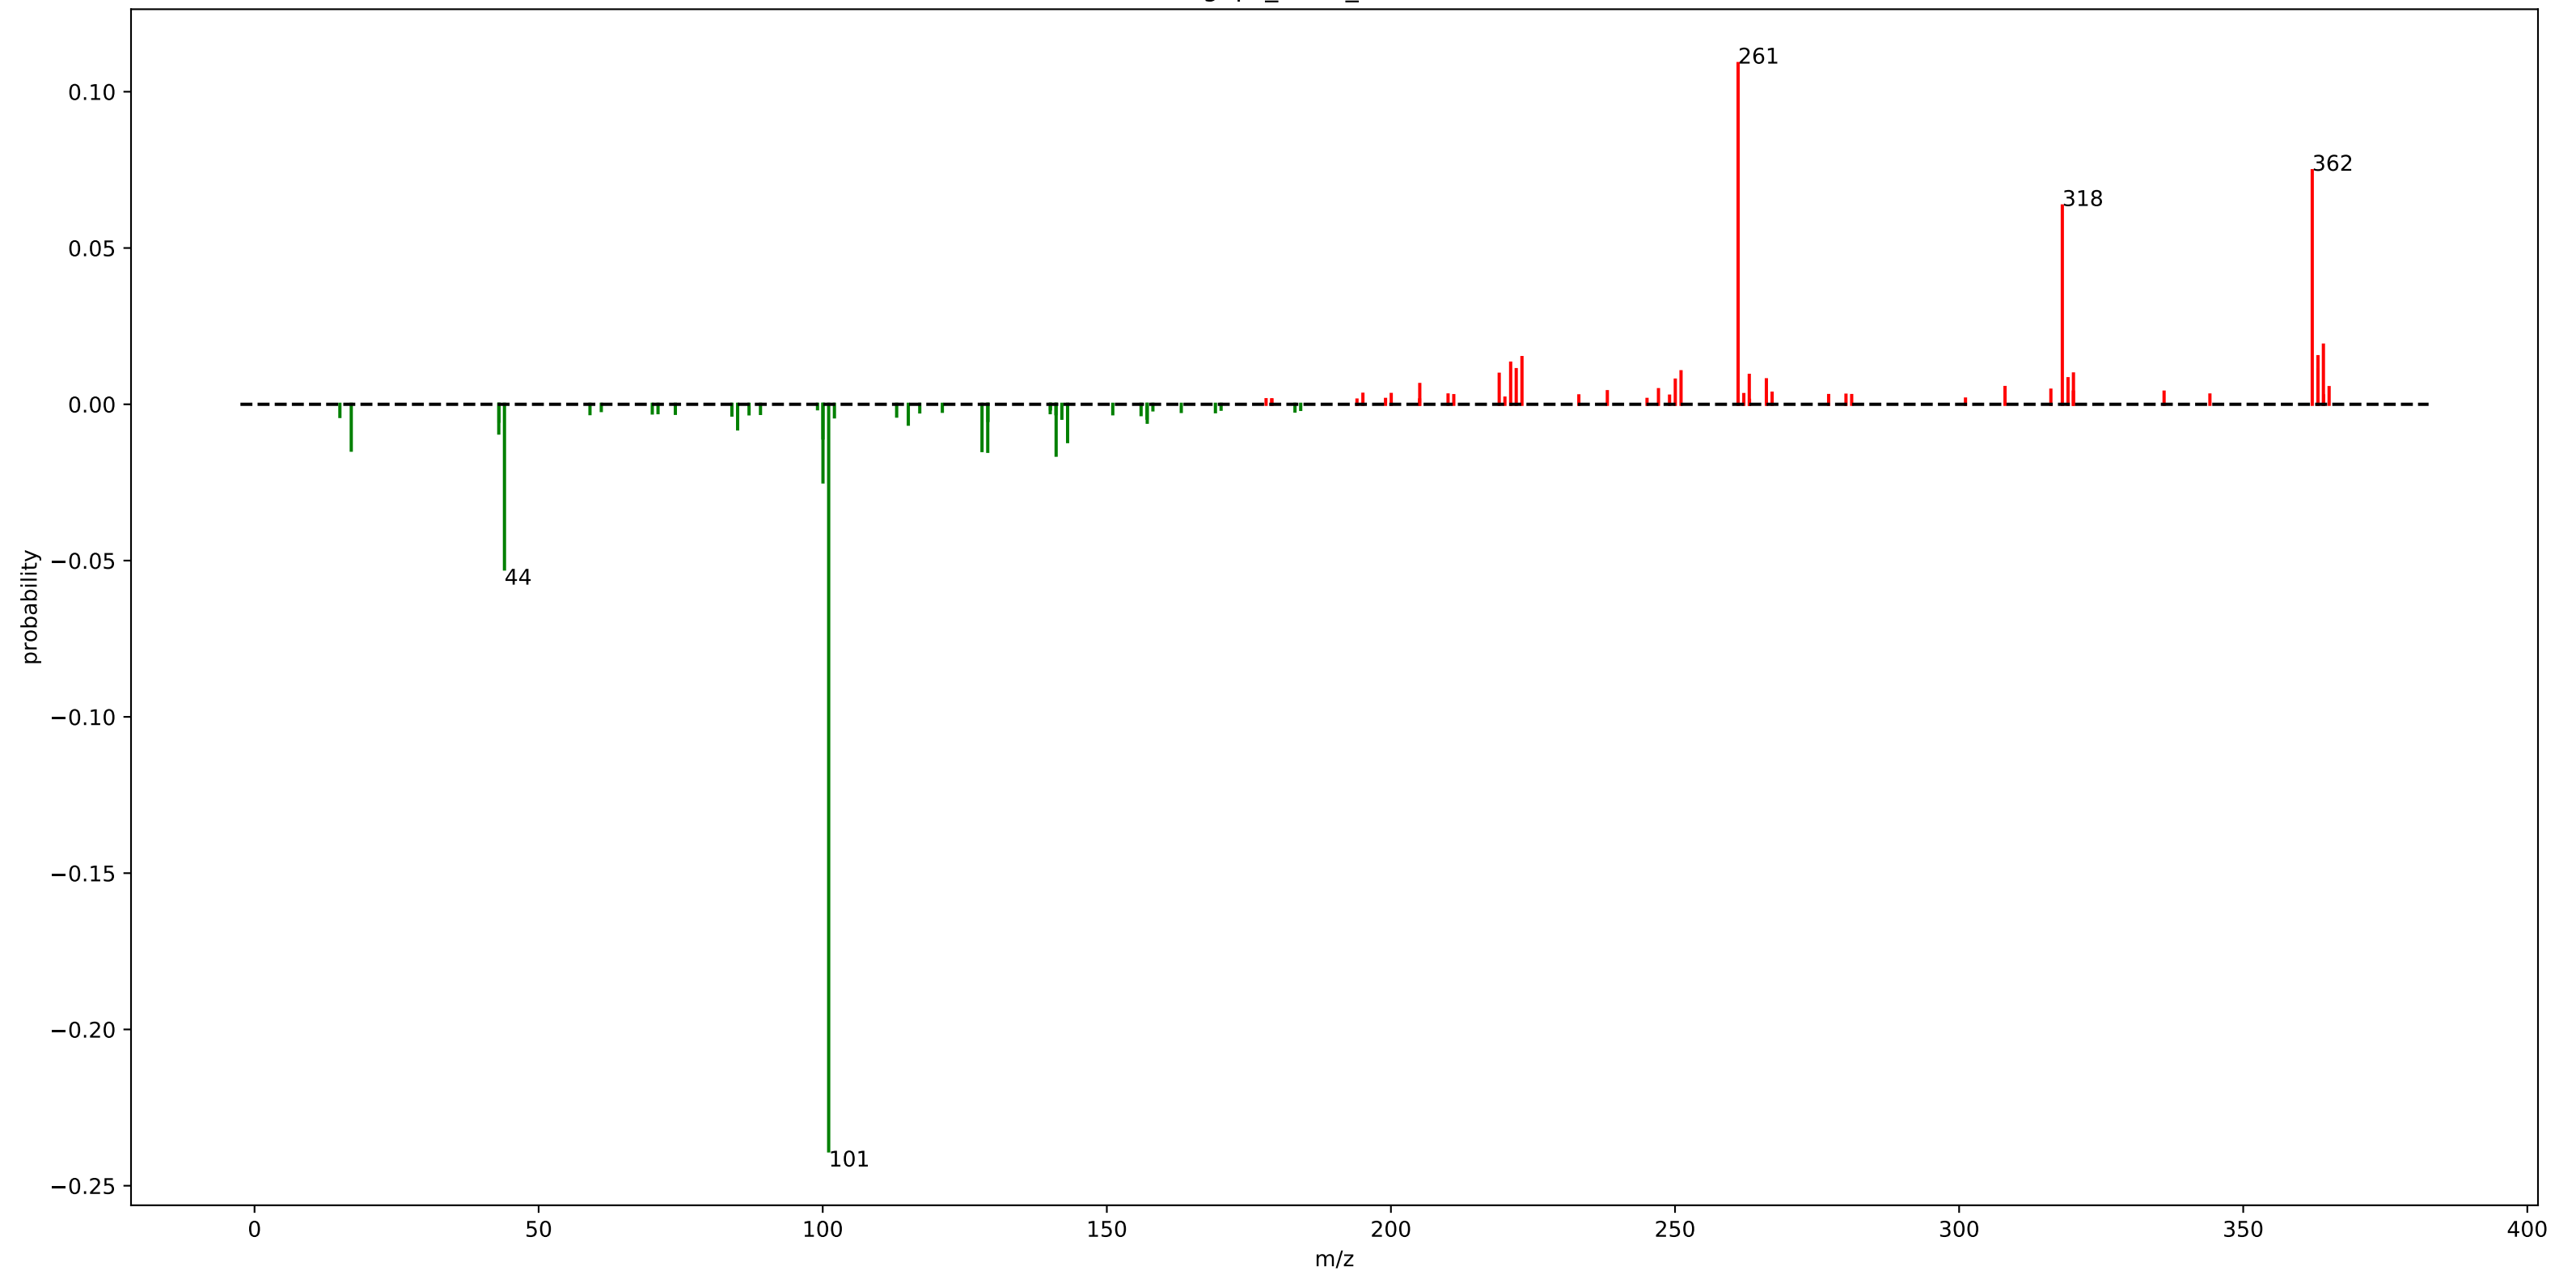

## gnps\_motif\_22.m2m

|                   |        |                   |        |
|-------------------|--------|-------------------|--------|
| loss_101.0475     | : 0.24 | fragment_219.0575 | : 0.01 |
| fragment_261.1025 | : 0.11 | fragment_263.0675 | : 0.01 |
| fragment_362.1475 | : 0.07 | loss_42.9875      | : 0.01 |
| fragment_318.1625 | : 0.06 | fragment_319.1675 | : 0.01 |
| loss_43.9875      | : 0.05 | loss_85.0225      | : 0.01 |
| loss_100.0425     | : 0.02 | fragment_266.0775 | : 0.01 |
| fragment_364.1125 | : 0.02 | fragment_250.0475 | : 0.01 |
| loss_141.0775     | : 0.02 | loss_115.0625     | : 0.01 |
| fragment_363.1575 | : 0.02 | fragment_205.0775 | : 0.01 |
| loss_129.0425     | : 0.02 | loss_157.1125     | : 0.01 |
| fragment_223.0625 | : 0.01 | loss_43.0225      | : 0.01 |
| loss_128.0325     | : 0.01 | fragment_308.0775 | : 0.01 |
| loss_17.0225      | : 0.01 | fragment_365.1175 | : 0.01 |
| fragment_221.0725 | : 0.01 | loss_129.0775     | : 0.01 |
| loss_143.0975     | : 0.01 |                   |        |
| fragment_222.0525 | : 0.01 |                   |        |
| fragment_363.1525 | : 0.01 |                   |        |
| loss_100.0375     | : 0.01 |                   |        |
| fragment_251.0575 | : 0.01 |                   |        |
| fragment_320.1225 | : 0.01 |                   |        |

rhabdus\_motif\_116.m2m

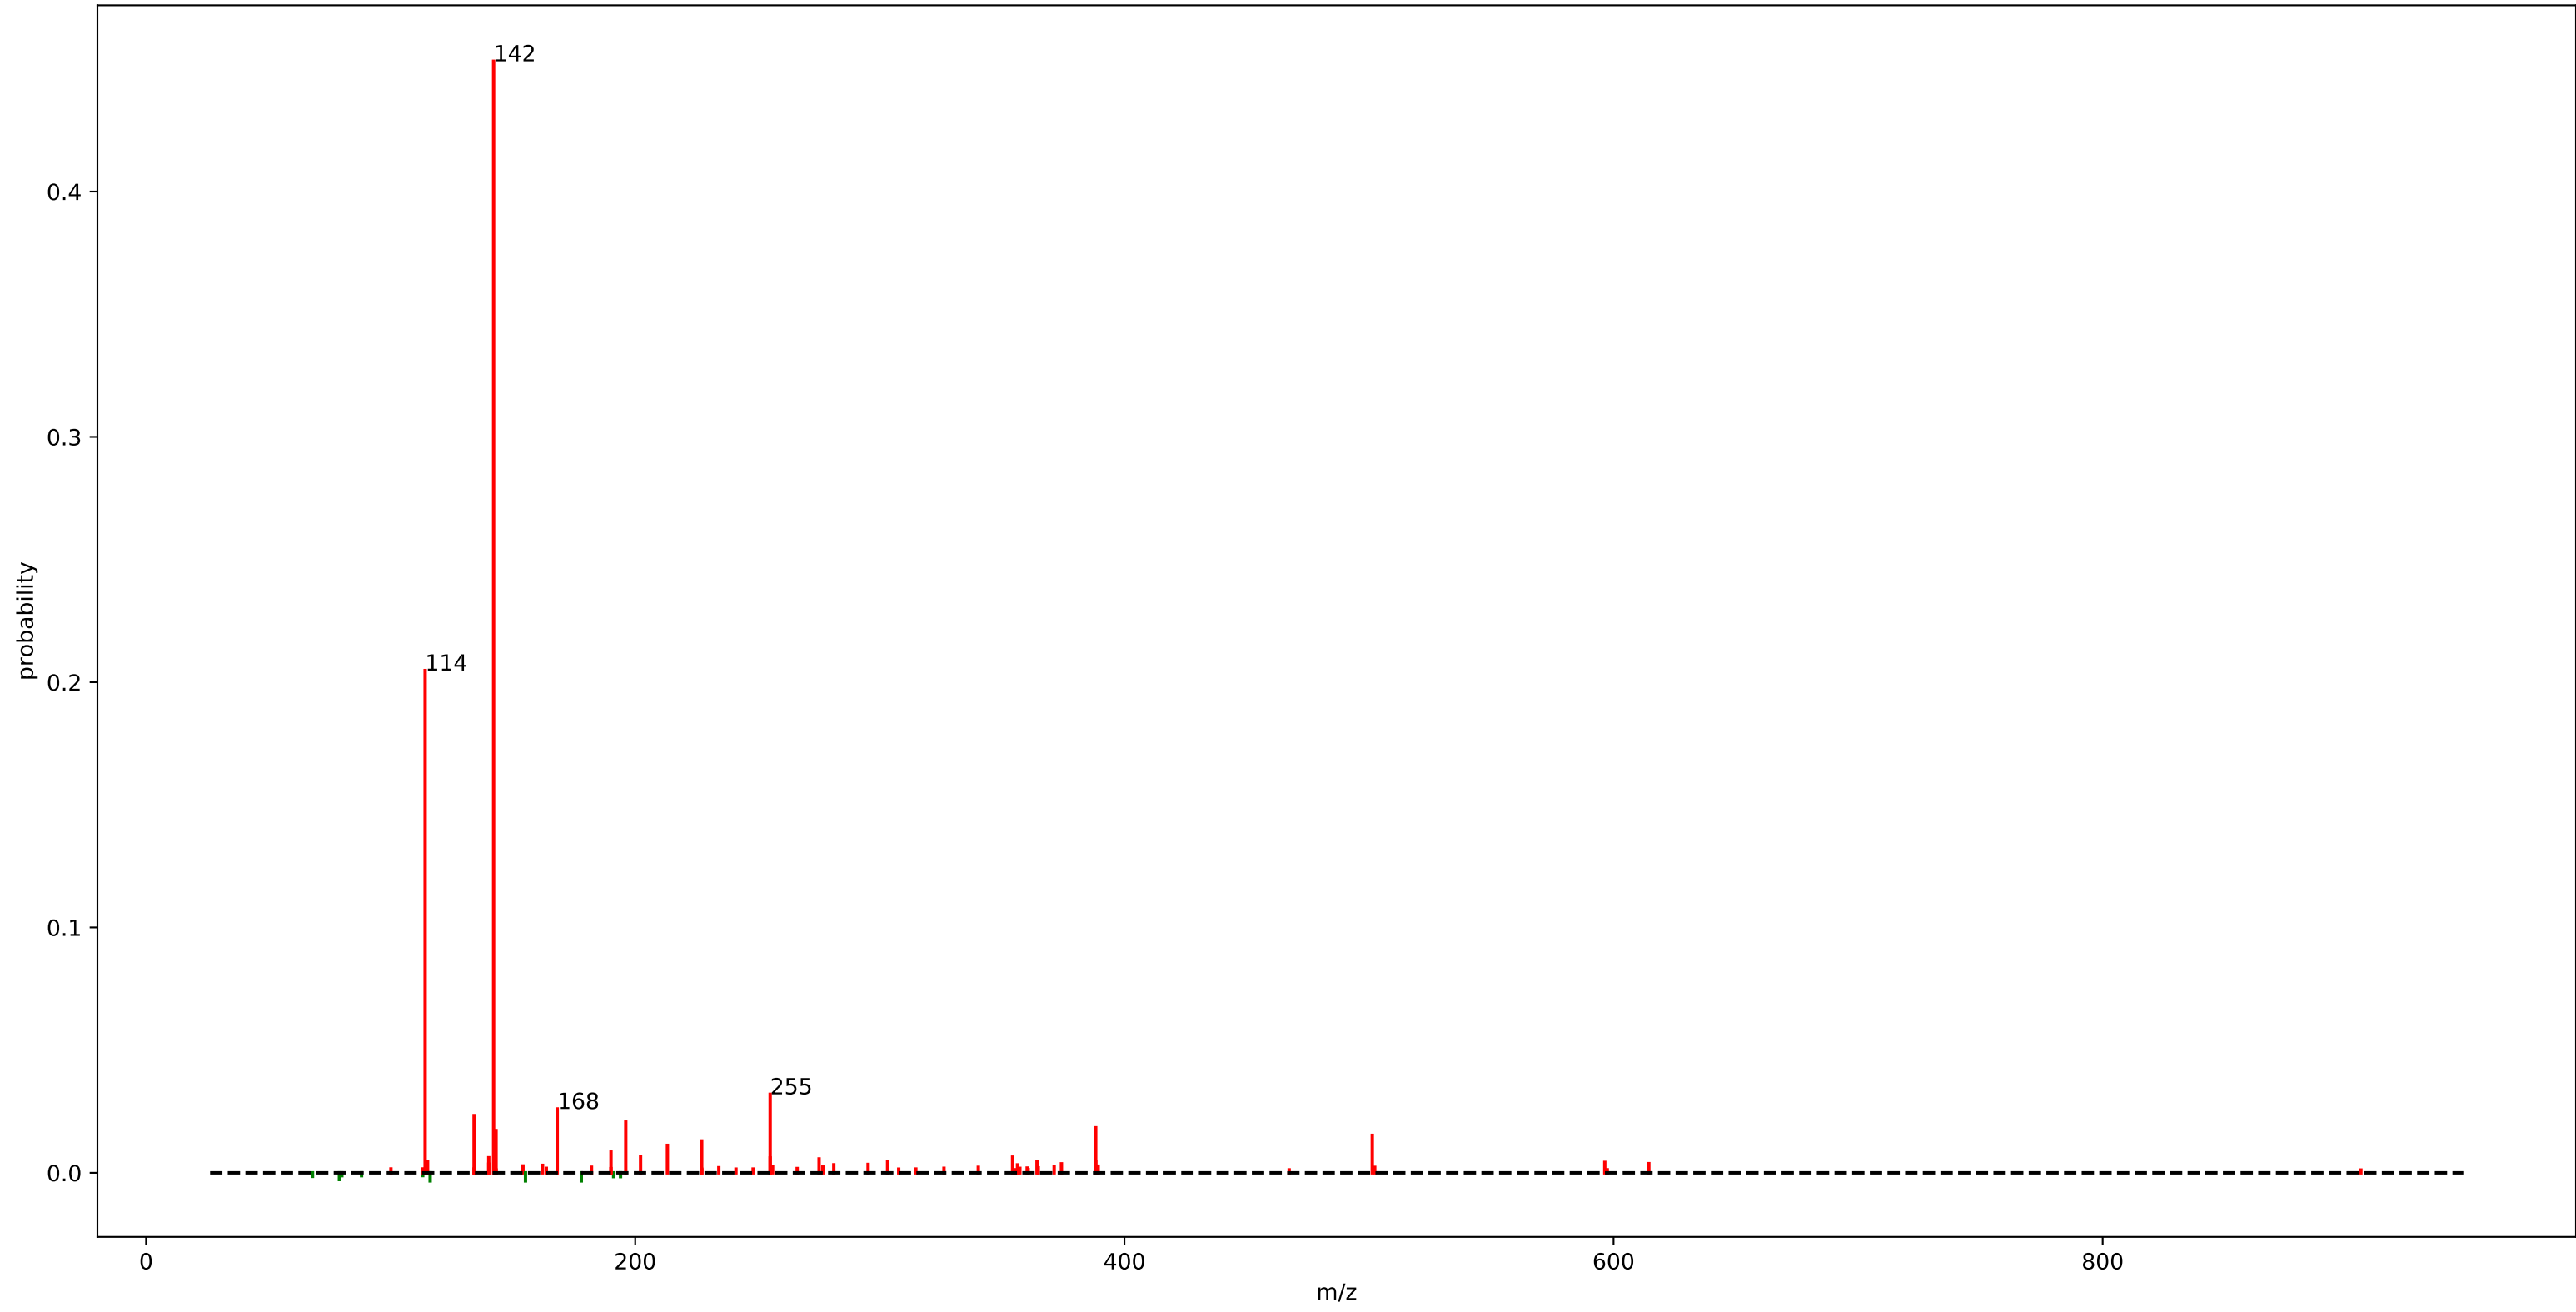

## rhabdus\_motif\_116.m2m

|                   |        |
|-------------------|--------|
| fragment_142.0875 | : 0.45 |
| fragment_114.0875 | : 0.20 |
| fragment_255.1675 | : 0.03 |
| fragment_168.1025 | : 0.03 |
| fragment_134.0975 | : 0.02 |
| fragment_196.1325 | : 0.02 |
| fragment_388.2575 | : 0.02 |
| fragment_143.0875 | : 0.02 |
| fragment_501.3425 | : 0.02 |
| fragment_227.1775 | : 0.01 |
| fragment_213.1625 | : 0.01 |
| fragment_190.0875 | : 0.01 |
| fragment_202.1925 | : 0.01 |
| fragment_354.2725 | : 0.01 |
| fragment_140.1075 | : 0.01 |
| fragment_255.1725 | : 0.01 |
| fragment_275.1725 | : 0.01 |

gnps\_motif\_71.m2m

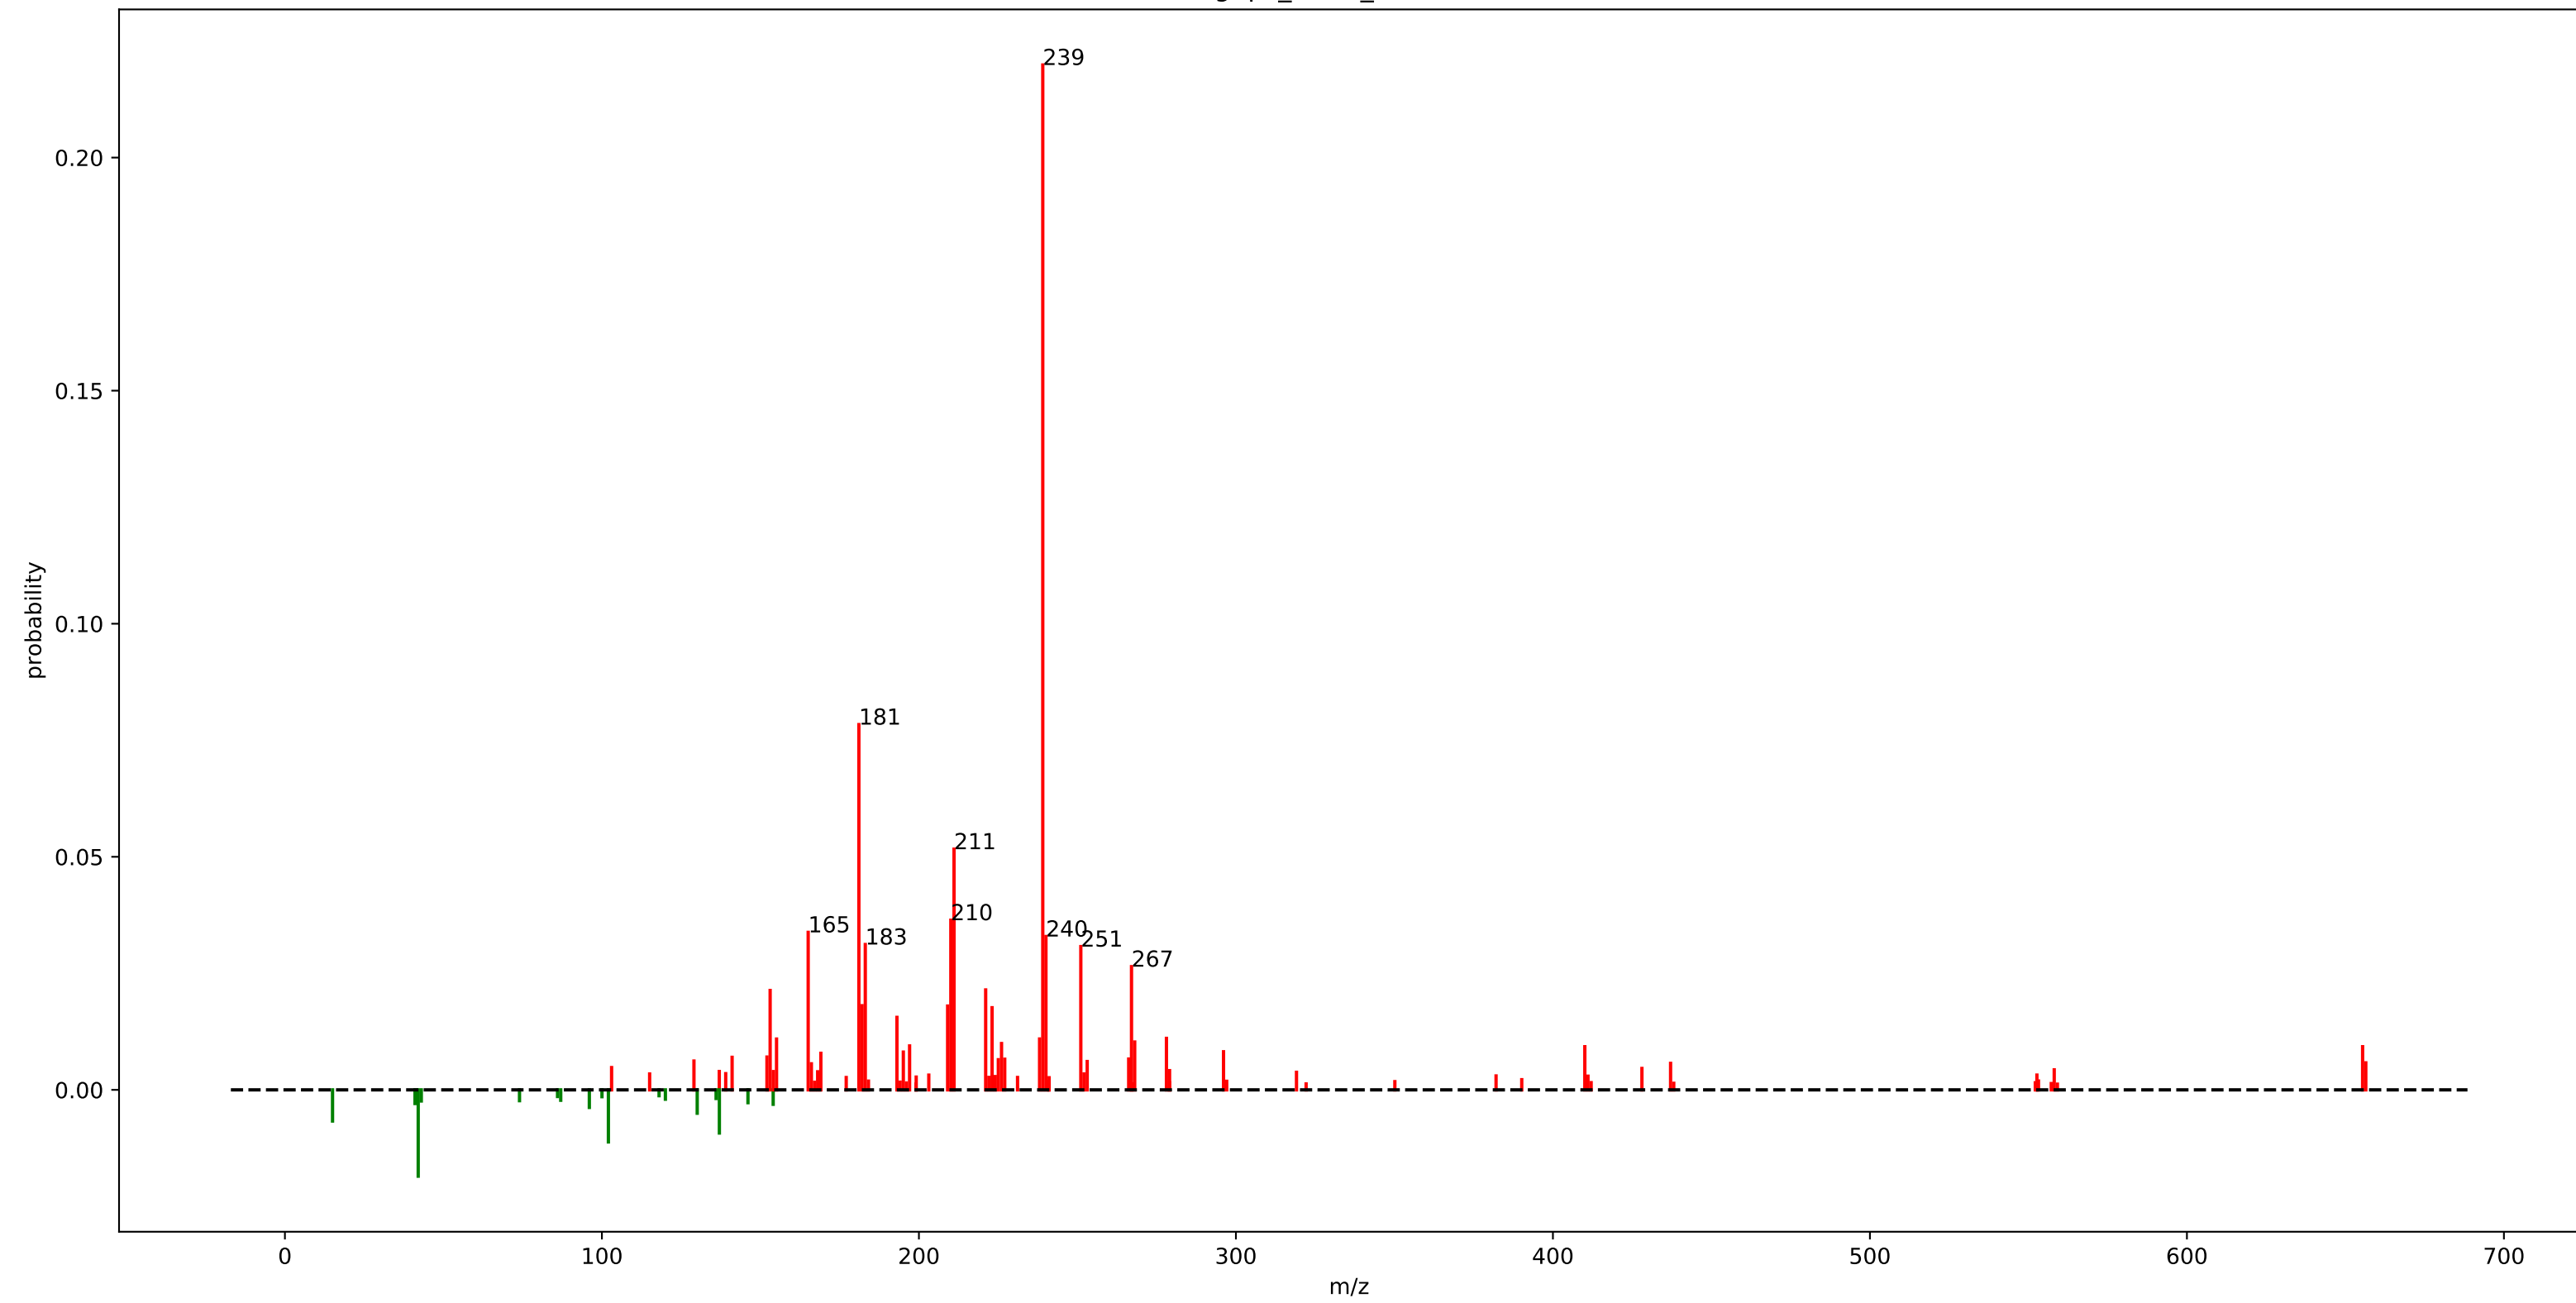

# gnps\_motif\_71.m2m

|                   |        |                   |        |               |        |
|-------------------|--------|-------------------|--------|---------------|--------|
| fragment_239.0725 | : 0.22 | fragment_268.0725 | : 0.01 | loss_130.0625 | : 0.01 |
| fragment_181.0625 | : 0.08 | fragment_226.0625 | : 0.01 |               |        |
| fragment_211.0775 | : 0.05 | fragment_197.0575 | : 0.01 |               |        |
| fragment_210.0675 | : 0.04 | fragment_655.4225 | : 0.01 |               |        |
| fragment_165.0675 | : 0.03 | loss_137.0525     | : 0.01 |               |        |
| fragment_240.0725 | : 0.03 | fragment_410.0625 | : 0.01 |               |        |
| fragment_183.0825 | : 0.03 | fragment_296.0925 | : 0.01 |               |        |
| fragment_251.0725 | : 0.03 | fragment_195.0825 | : 0.01 |               |        |
| fragment_267.0625 | : 0.03 | fragment_169.0625 | : 0.01 |               |        |
| fragment_221.0575 | : 0.02 | fragment_152.0625 | : 0.01 |               |        |
| fragment_153.0675 | : 0.02 | fragment_141.0675 | : 0.01 |               |        |
| loss_42.0475      | : 0.02 | loss_15.0225      | : 0.01 |               |        |
| fragment_182.0725 | : 0.02 | fragment_266.1725 | : 0.01 |               |        |
| fragment_209.0575 | : 0.02 | fragment_227.0725 | : 0.01 |               |        |
| fragment_223.0775 | : 0.02 | fragment_225.0525 | : 0.01 |               |        |
| fragment_193.0675 | : 0.02 | fragment_129.0325 | : 0.01 |               |        |
| loss_102.0425     | : 0.01 | fragment_253.0875 | : 0.01 |               |        |
| fragment_278.0825 | : 0.01 | fragment_656.4325 | : 0.01 |               |        |
| fragment_238.0625 | : 0.01 | fragment_437.1175 | : 0.01 |               |        |
| fragment_155.0875 | : 0.01 | fragment_166.0775 | : 0.01 |               |        |



urine\_mass2motif\_208.m2m

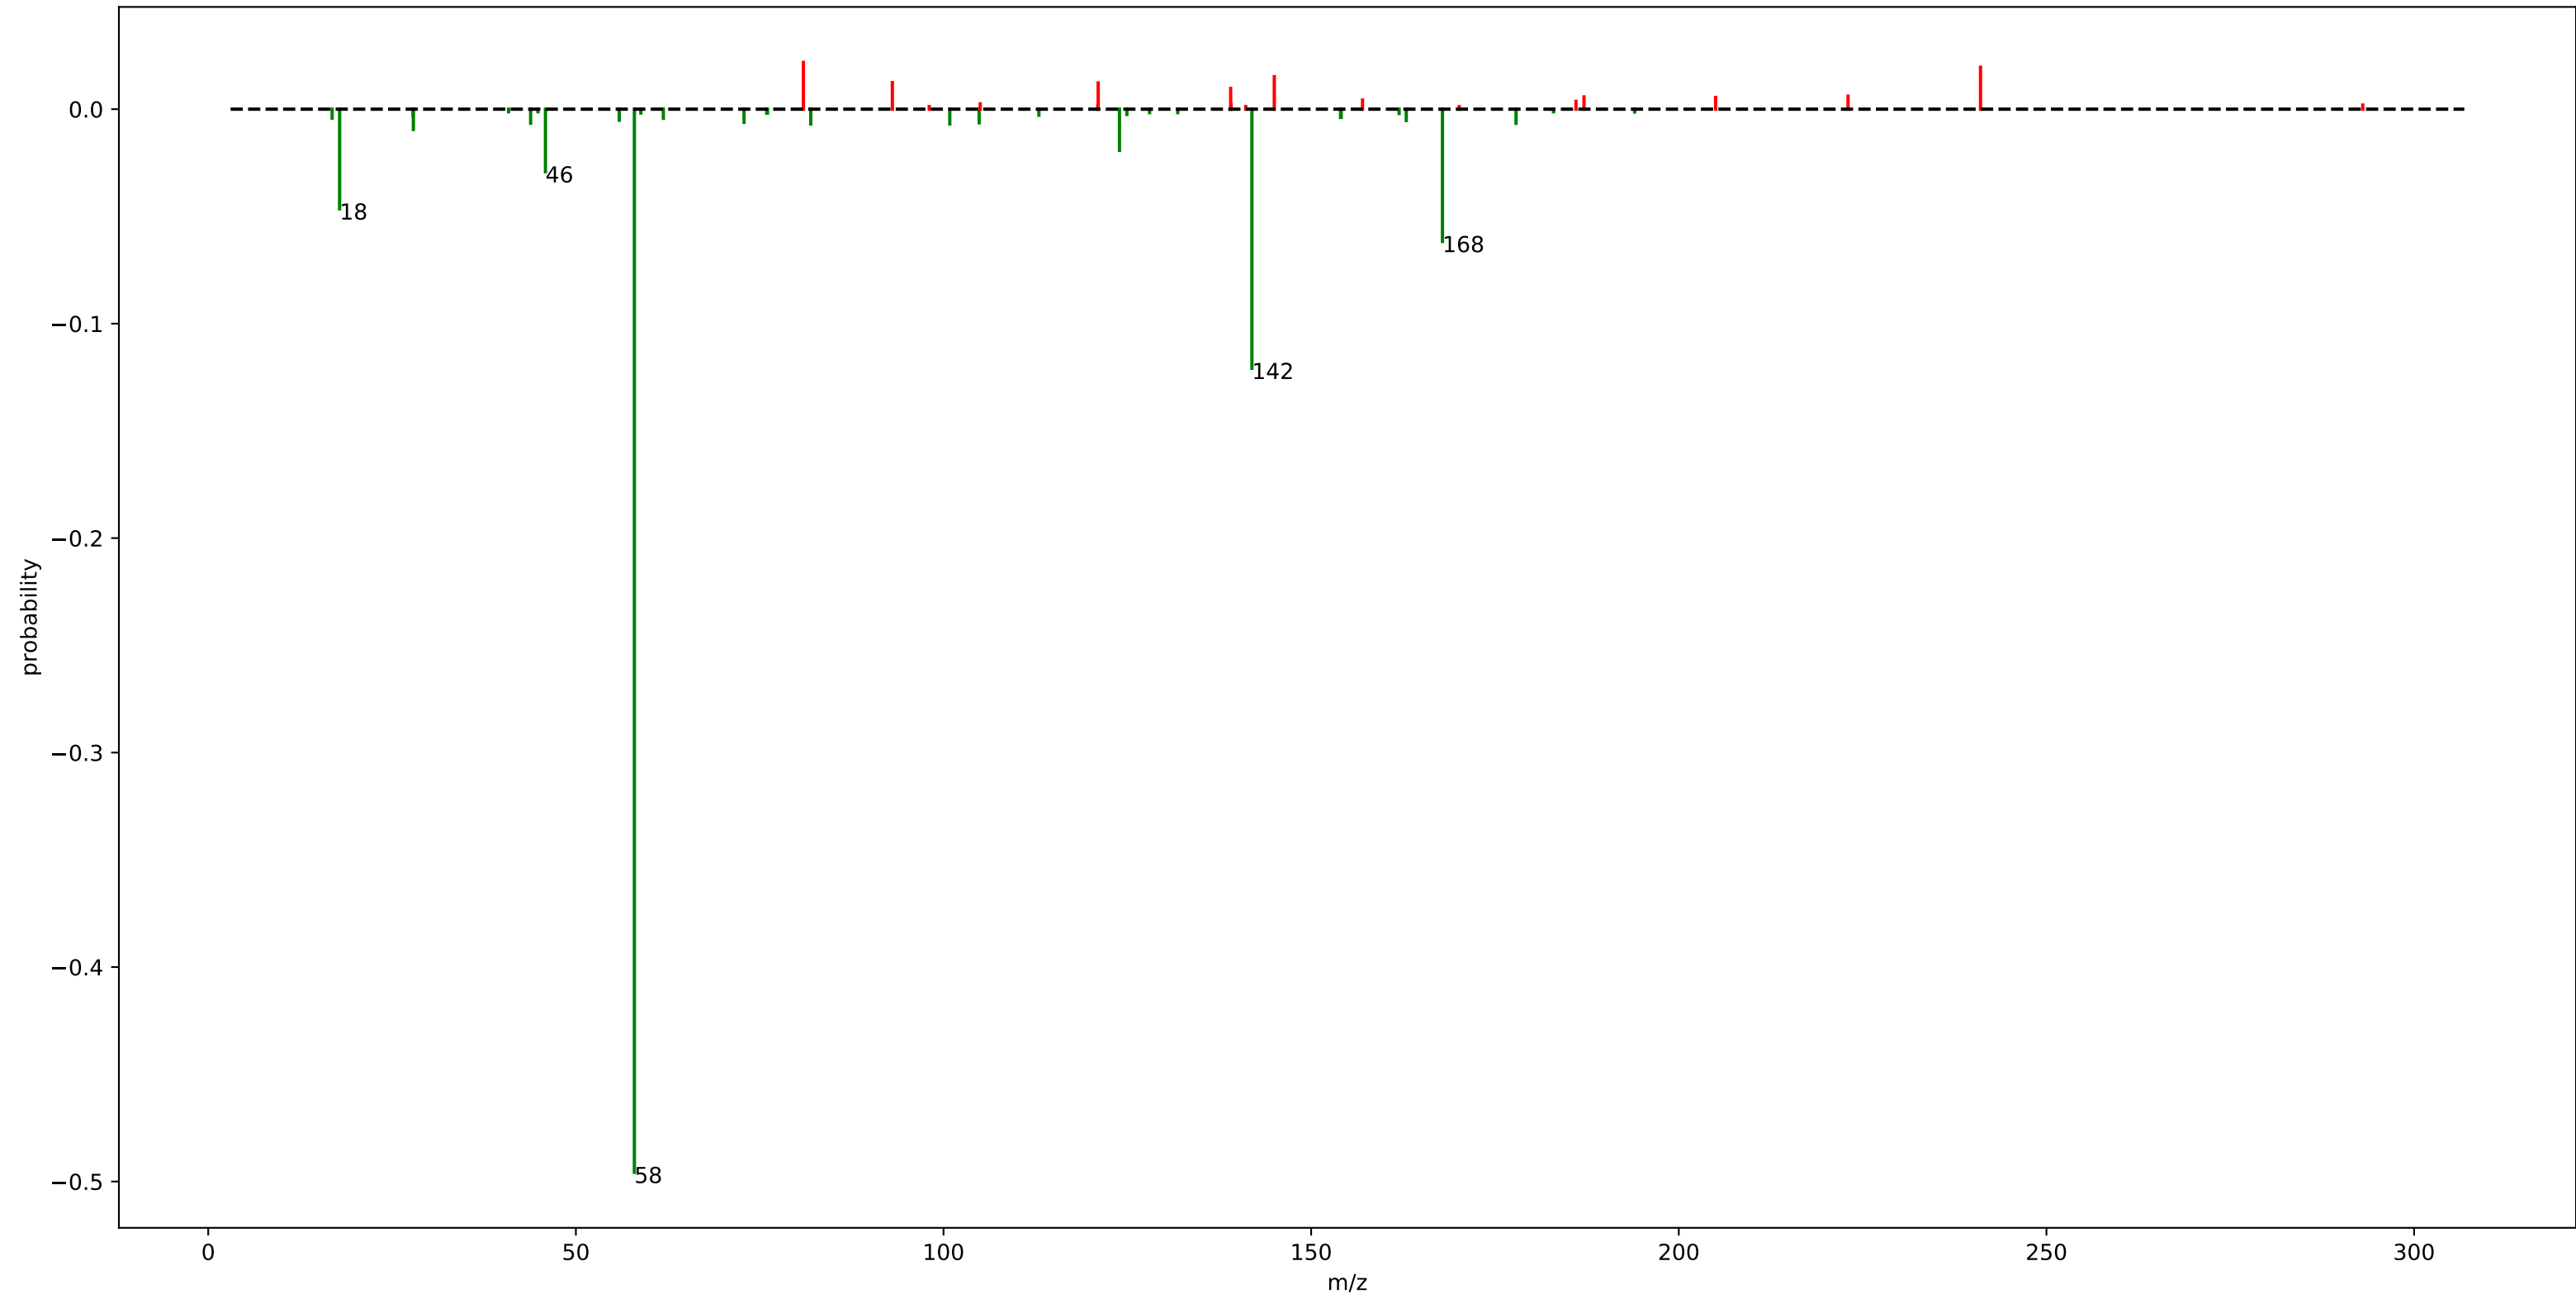

# urine\_mass2motif\_208.m2m

|                   |        |                   |        |
|-------------------|--------|-------------------|--------|
| loss_57.9575      | : 0.50 | fragment_187.1075 | : 0.01 |
| loss_141.9425     | : 0.12 | fragment_205.0075 | : 0.01 |
| loss_167.8575     | : 0.06 | loss_162.9375     | : 0.01 |
| loss_17.8675      | : 0.05 | loss_55.9025      | : 0.01 |
| loss_45.8625      | : 0.03 |                   |        |
| fragment_80.9475  | : 0.02 |                   |        |
| fragment_241.0325 | : 0.02 |                   |        |
| loss_123.9275     | : 0.02 |                   |        |
| fragment_144.9875 | : 0.02 |                   |        |
| fragment_93.0425  | : 0.01 |                   |        |
| fragment_121.0375 | : 0.01 |                   |        |
| fragment_139.0525 | : 0.01 |                   |        |
| loss_27.8975      | : 0.01 |                   |        |
| loss_81.9425      | : 0.01 |                   |        |
| loss_100.8525     | : 0.01 |                   |        |
| loss_177.8675     | : 0.01 |                   |        |
| loss_43.8475      | : 0.01 |                   |        |
| loss_104.8475     | : 0.01 |                   |        |
| loss_72.8725      | : 0.01 |                   |        |
| fragment_223.0175 | : 0.01 |                   |        |

motif\_412

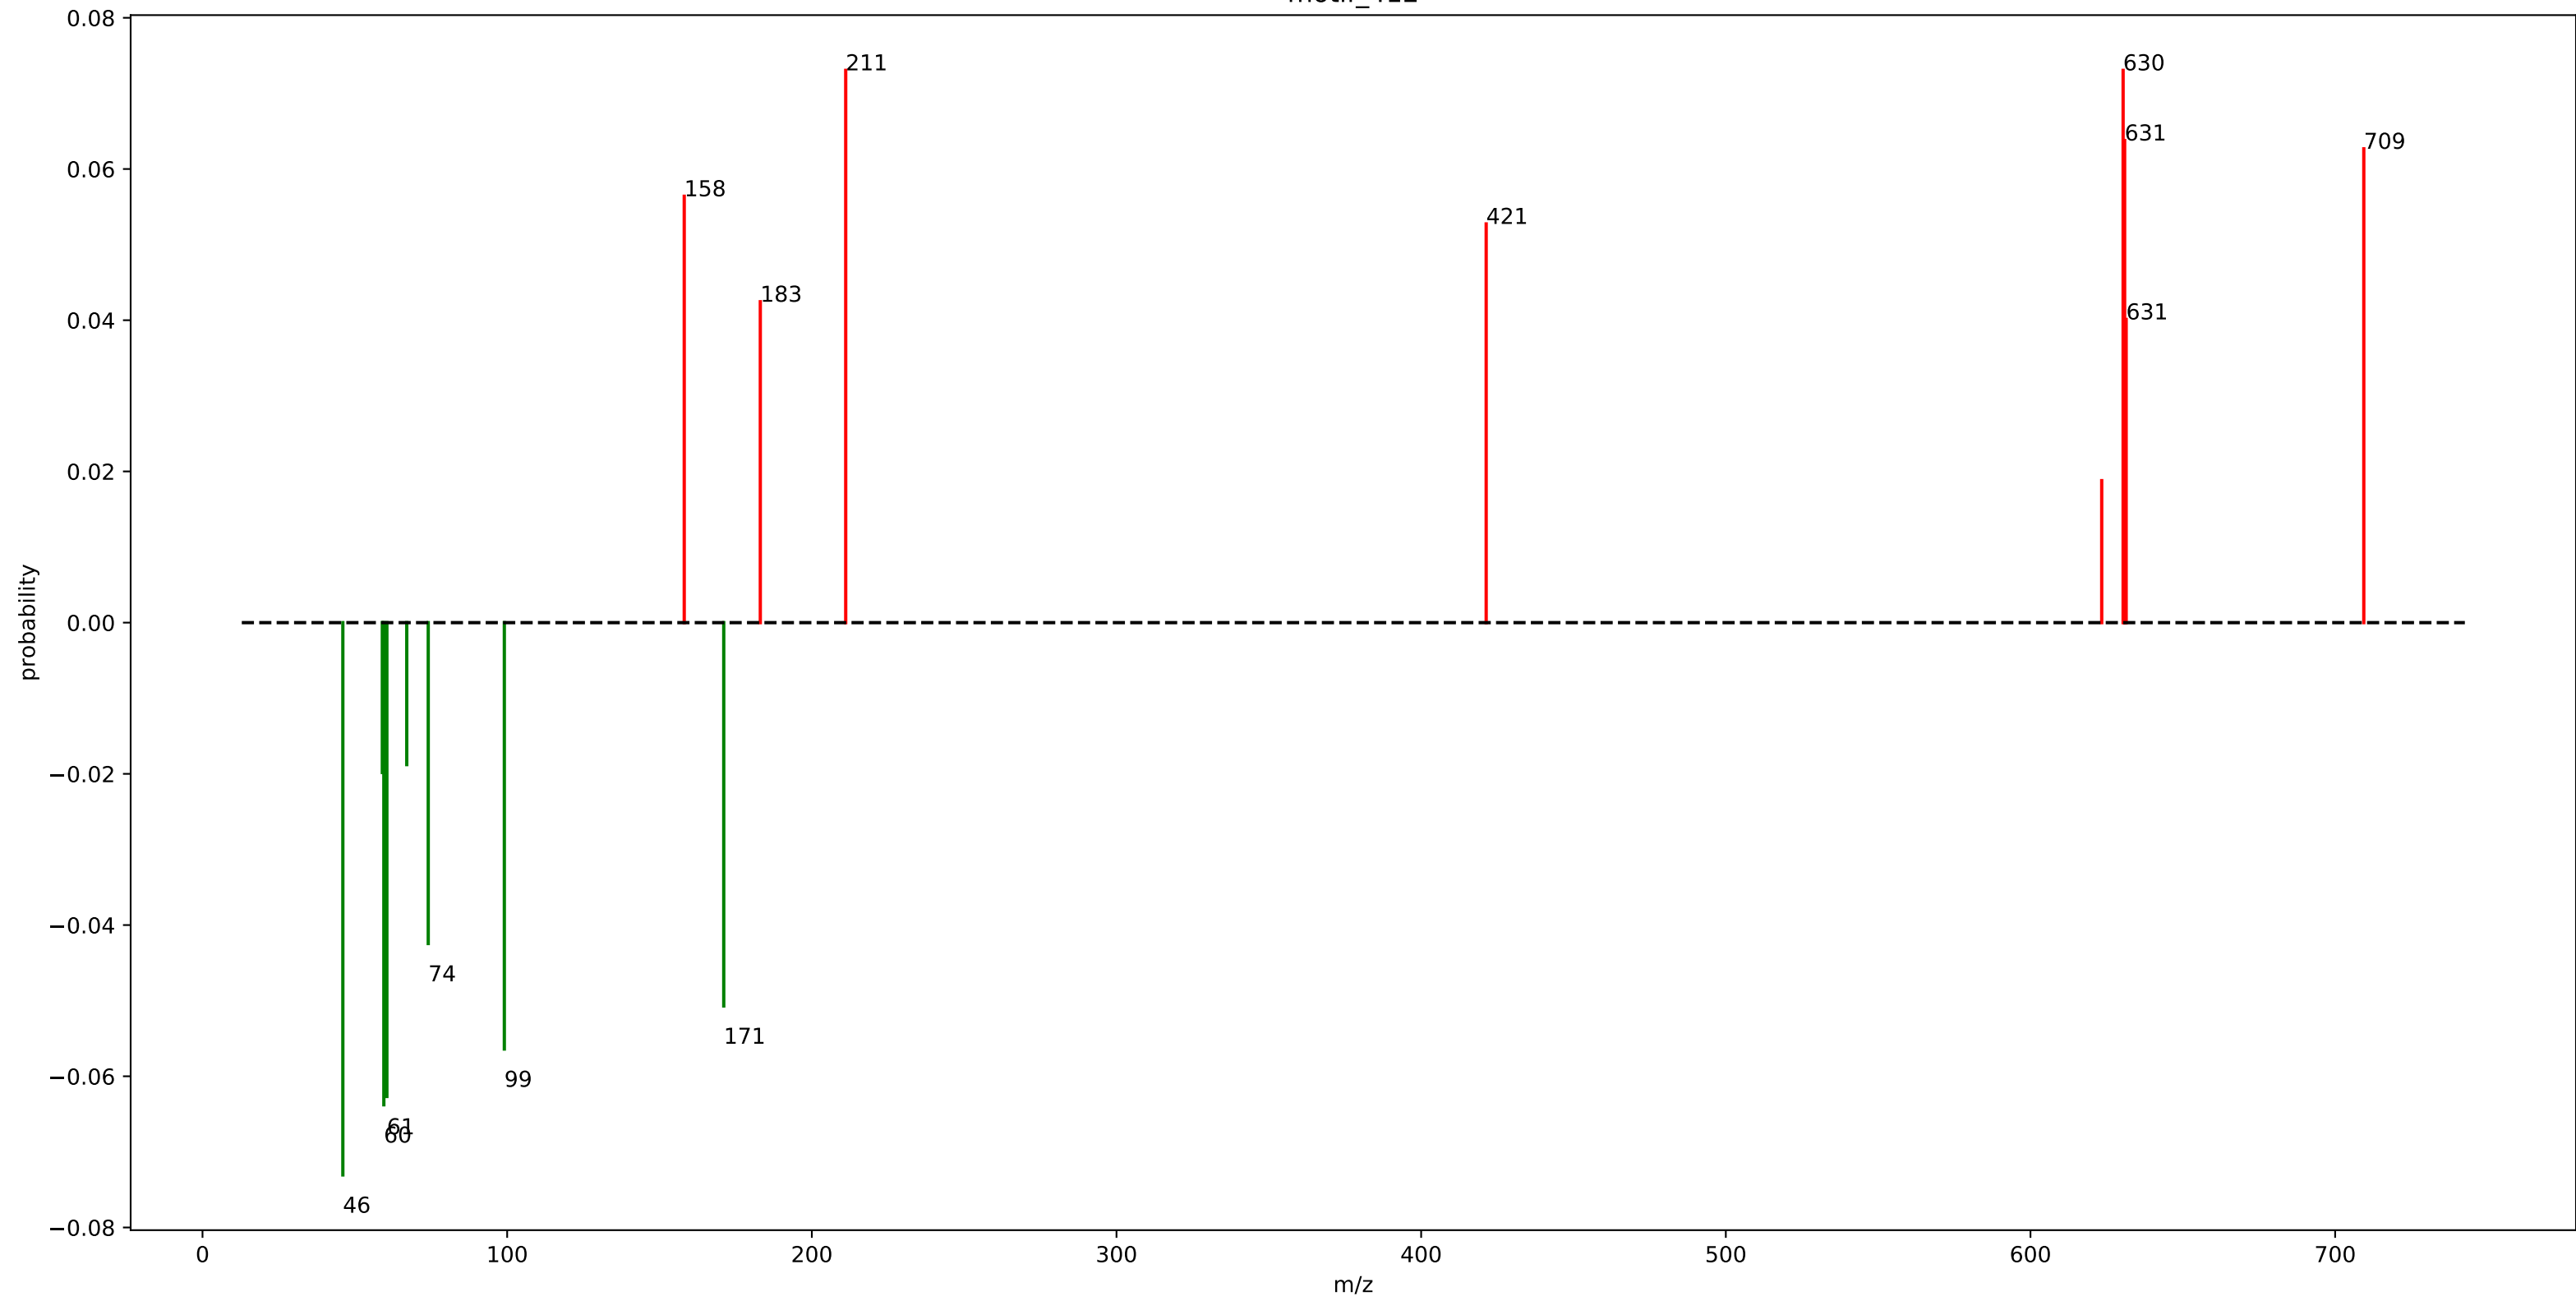

## motif\_412

|                   |        |
|-------------------|--------|
| fragment_211.1225 | : 0.07 |
| loss_46.0625      | : 0.07 |
| fragment_630.4075 | : 0.07 |
| fragment_630.9075 | : 0.06 |
| loss_59.5175      | : 0.06 |
| loss_60.5175      | : 0.06 |
| fragment_709.4075 | : 0.06 |
| fragment_158.1175 | : 0.06 |
| loss_99.0675      | : 0.06 |
| fragment_421.3425 | : 0.05 |
| loss_171.0875     | : 0.05 |
| loss_74.0925      | : 0.04 |
| fragment_183.0875 | : 0.04 |
| fragment_631.4075 | : 0.04 |
| loss_59.0175      | : 0.02 |
| fragment_623.3825 | : 0.02 |
| loss_67.0425      | : 0.02 |

urine\_mass2motif\_151.m2m

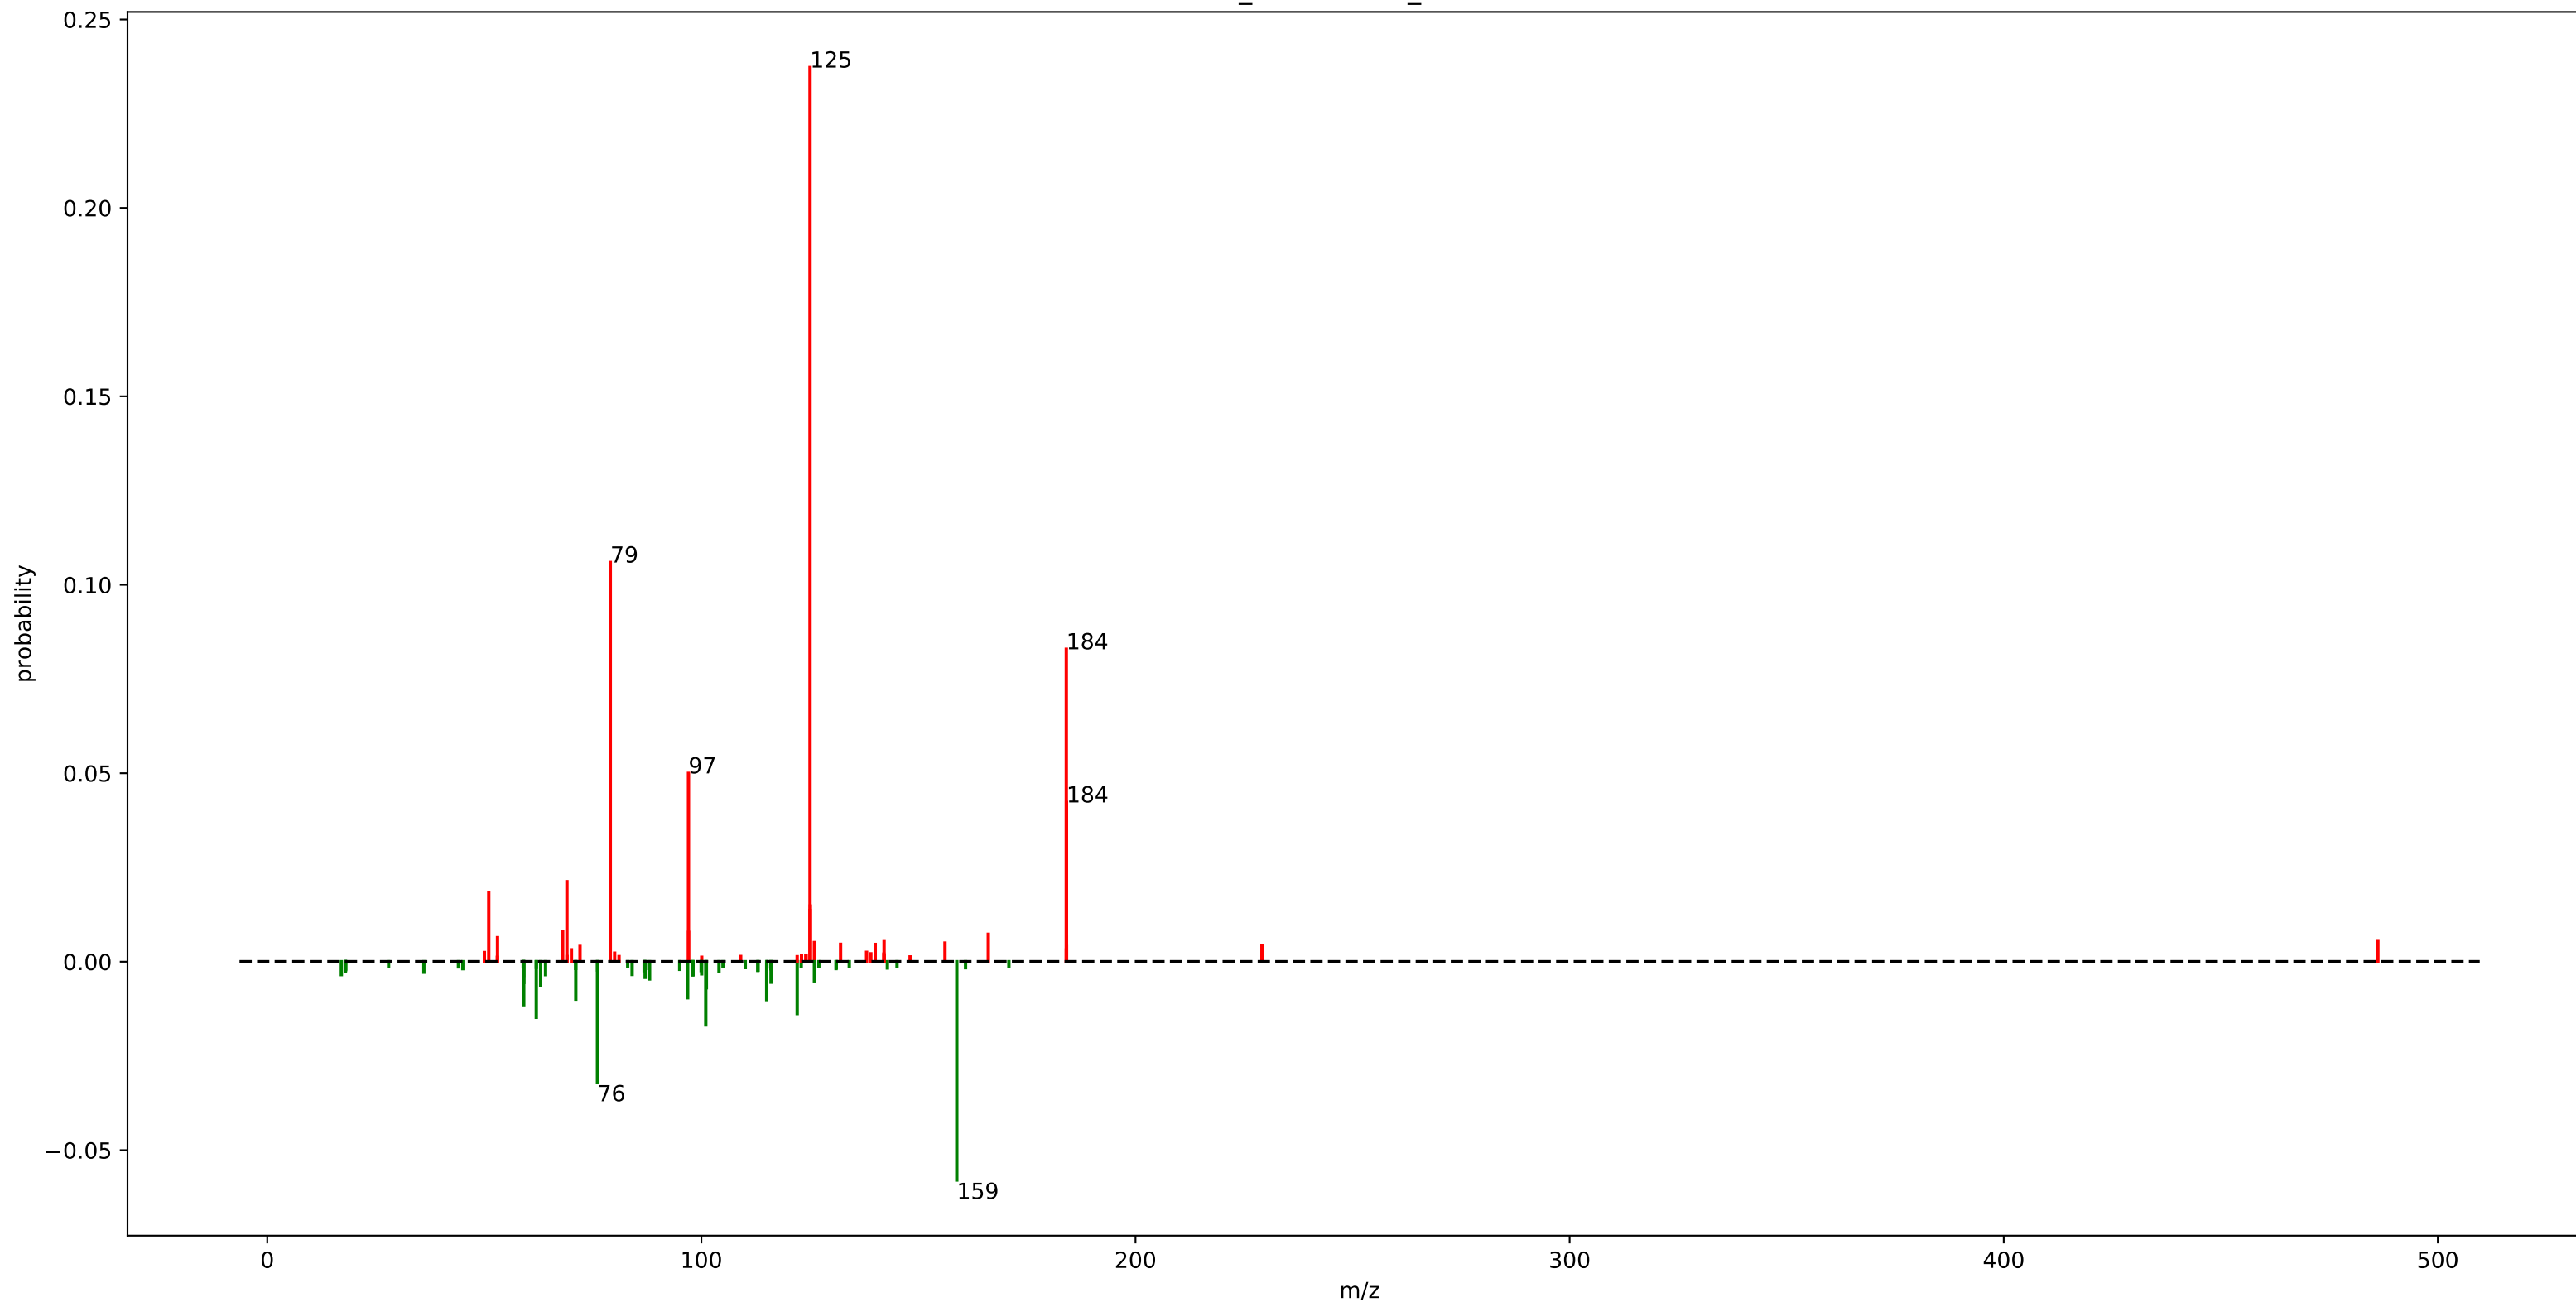

# urine\_mass2motif\_151.m2m

|                   |        |                   |        |
|-------------------|--------|-------------------|--------|
| fragment_125.0225 | : 0.24 | fragment_166.0875 | : 0.01 |
| fragment_79.0175  | : 0.11 | loss_101.1475     | : 0.01 |
| fragment_184.0625 | : 0.08 | fragment_184.1075 | : 0.01 |
| loss_158.8375     | : 0.06 | fragment_53.0375  | : 0.01 |
| fragment_97.0275  | : 0.05 | loss_62.9775      | : 0.01 |
| fragment_184.0975 | : 0.04 | loss_59.0925      | : 0.01 |
| loss_76.0625      | : 0.03 | loss_116.0425     | : 0.01 |
| fragment_69.0325  | : 0.02 | fragment_486.1925 | : 0.01 |
| fragment_51.0225  | : 0.02 | fragment_142.0875 | : 0.01 |
| loss_101.0125     | : 0.02 | fragment_126.0275 | : 0.01 |
| fragment_125.0775 | : 0.01 | loss_126.0325     | : 0.01 |
| loss_61.9725      | : 0.01 |                   |        |
| loss_122.0675     | : 0.01 |                   |        |
| fragment_125.0475 | : 0.01 |                   |        |
| loss_59.0825      | : 0.01 |                   |        |
| loss_115.0425     | : 0.01 |                   |        |
| loss_71.0725      | : 0.01 |                   |        |
| loss_96.8375      | : 0.01 |                   |        |
| fragment_68.0475  | : 0.01 |                   |        |
| fragment_97.0475  | : 0.01 |                   |        |

motif\_619

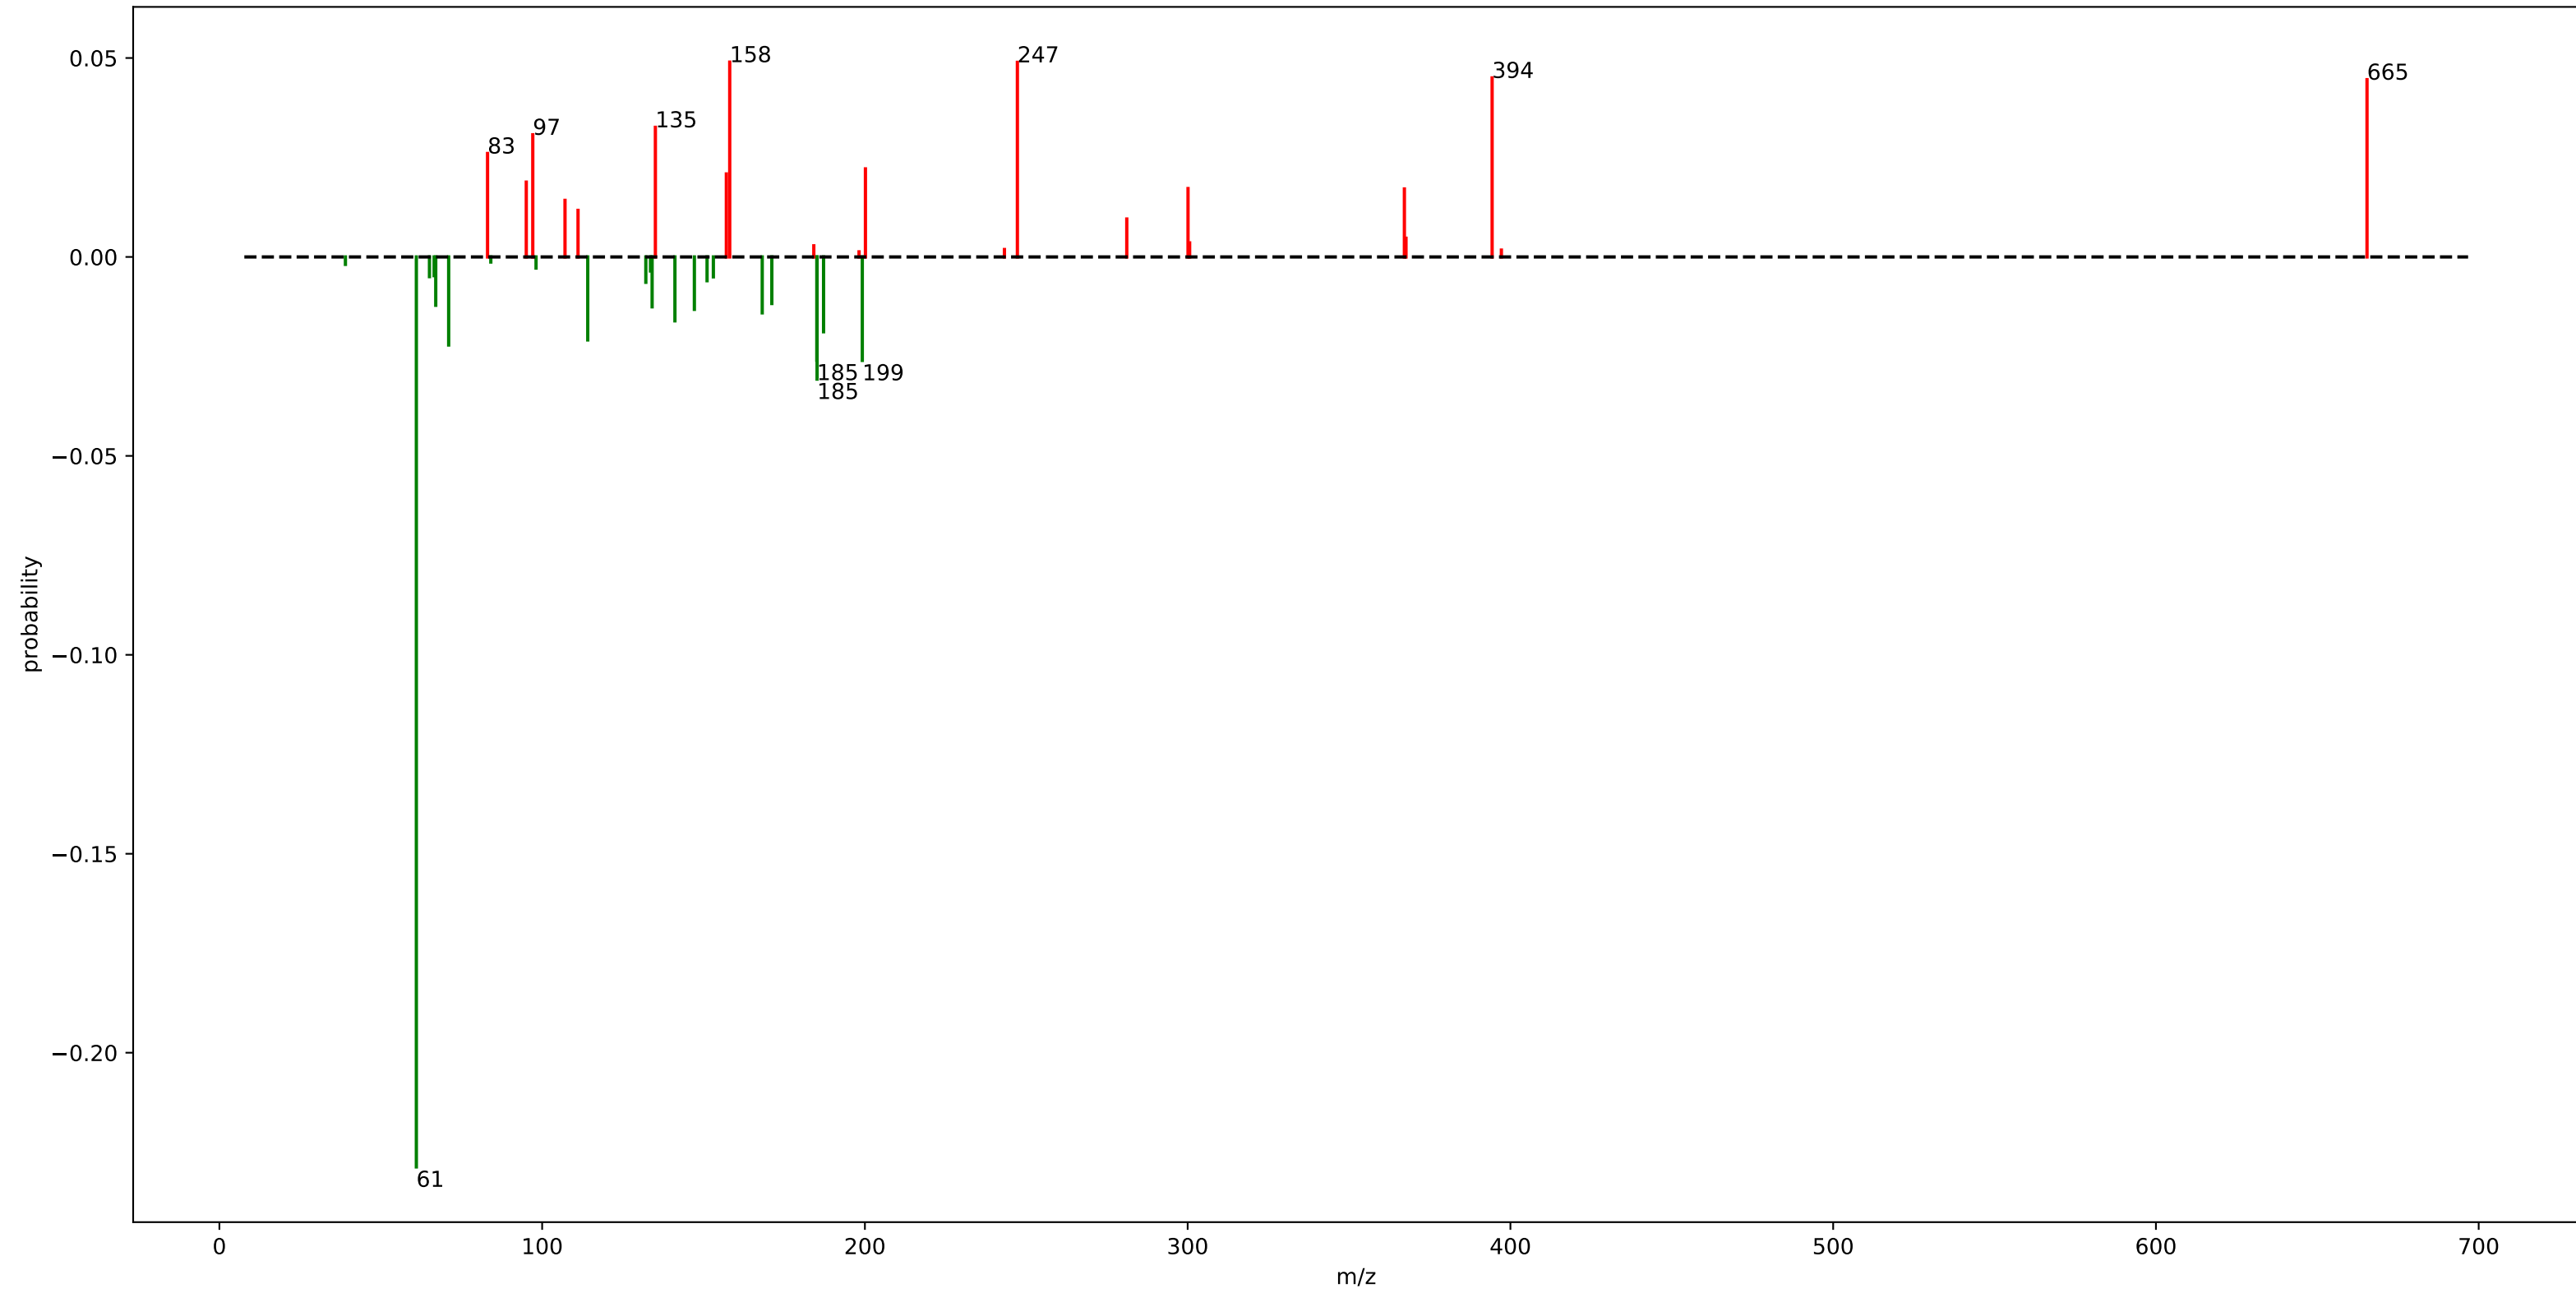

## motif\_619

|                   |        |                   |        |
|-------------------|--------|-------------------|--------|
| loss_61.0225      | : 0.23 | fragment_107.0825 | : 0.01 |
| fragment_158.1175 | : 0.05 | loss_168.1875     | : 0.01 |
| fragment_247.2425 | : 0.05 | loss_147.1625     | : 0.01 |
| fragment_394.3325 | : 0.04 | loss_134.0725     | : 0.01 |
| fragment_665.4025 | : 0.04 | loss_67.0325      | : 0.01 |
| fragment_135.0825 | : 0.03 | loss_171.1625     | : 0.01 |
| fragment_97.0975  | : 0.03 | fragment_111.1175 | : 0.01 |
| loss_185.1775     | : 0.03 | fragment_281.1375 | : 0.01 |
| fragment_83.0825  | : 0.03 | loss_132.1225     | : 0.01 |
| loss_199.1925     | : 0.03 | loss_151.0975     | : 0.01 |
| loss_185.1025     | : 0.03 |                   |        |
| fragment_200.1625 | : 0.02 |                   |        |
| loss_71.0375      | : 0.02 |                   |        |
| fragment_157.0725 | : 0.02 |                   |        |
| loss_114.1275     | : 0.02 |                   |        |
| loss_187.1925     | : 0.02 |                   |        |
| fragment_95.0825  | : 0.02 |                   |        |
| fragment_300.1125 | : 0.02 |                   |        |
| fragment_367.1475 | : 0.02 |                   |        |
| loss_141.1375     | : 0.02 |                   |        |



urine\_mass2motif\_177.m2m

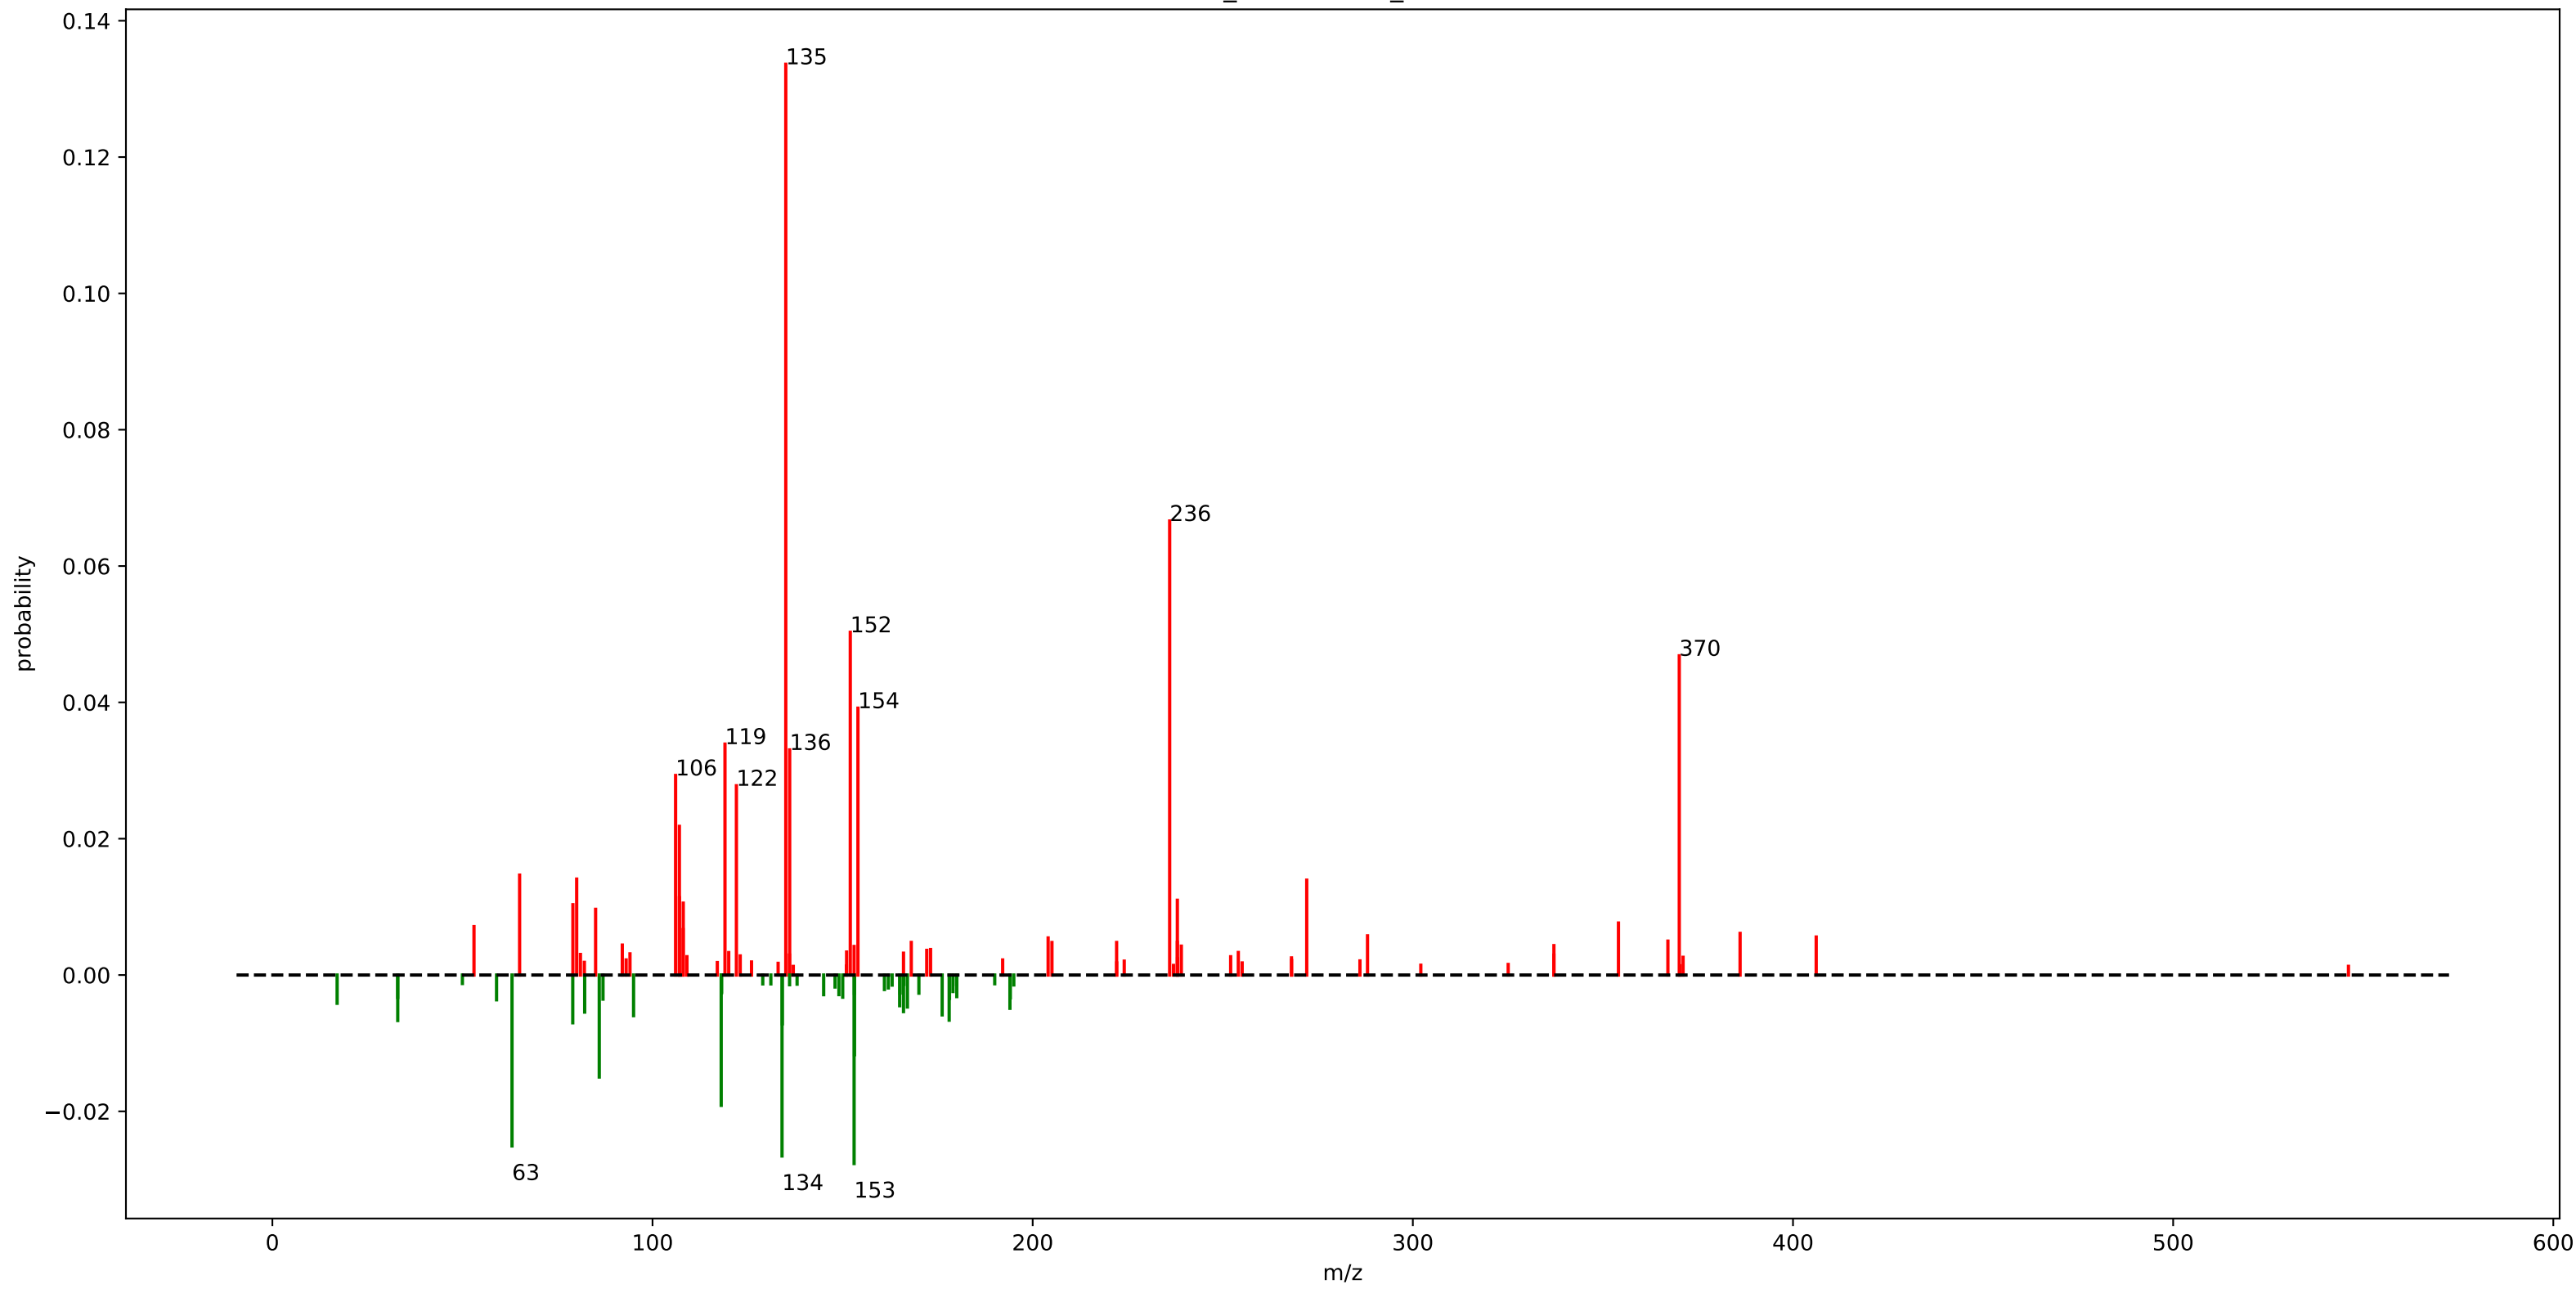

# urine\_mass2motif\_177.m2m

|                   |        |                   |        |
|-------------------|--------|-------------------|--------|
| fragment_135.0525 | : 0.13 | fragment_238.0525 | : 0.01 |
| fragment_236.0325 | : 0.07 | fragment_108.0825 | : 0.01 |
| fragment_152.0175 | : 0.05 | fragment_79.0525  | : 0.01 |
| fragment_370.0825 | : 0.05 | fragment_85.0275  | : 0.01 |
| fragment_154.0325 | : 0.04 | fragment_354.0875 | : 0.01 |
| fragment_119.0575 | : 0.03 | loss_134.1475     | : 0.01 |
| fragment_136.0775 | : 0.03 | fragment_53.0375  | : 0.01 |
| fragment_106.0675 | : 0.03 | loss_79.0175      | : 0.01 |
| fragment_122.0625 | : 0.03 | loss_32.9825      | : 0.01 |
| loss_153.0225     | : 0.03 | fragment_108.0425 | : 0.01 |
| loss_134.0625     | : 0.03 | loss_178.0325     | : 0.01 |
| loss_63.0375      | : 0.03 | fragment_386.0825 | : 0.01 |
| fragment_107.0625 | : 0.02 | loss_95.0125      | : 0.01 |
| loss_118.0625     | : 0.02 | loss_176.1875     | : 0.01 |
| loss_85.9875      | : 0.01 | fragment_288.0775 | : 0.01 |
| fragment_65.0375  | : 0.01 | fragment_406.1025 | : 0.01 |
| fragment_80.0475  | : 0.01 | fragment_204.0625 | : 0.01 |
| fragment_272.0875 | : 0.01 | loss_82.1525      | : 0.01 |
| loss_153.1275     | : 0.01 | loss_166.0175     | : 0.01 |
| fragment_107.0725 | : 0.01 |                   |        |

rhabdus\_motif\_162.m2m

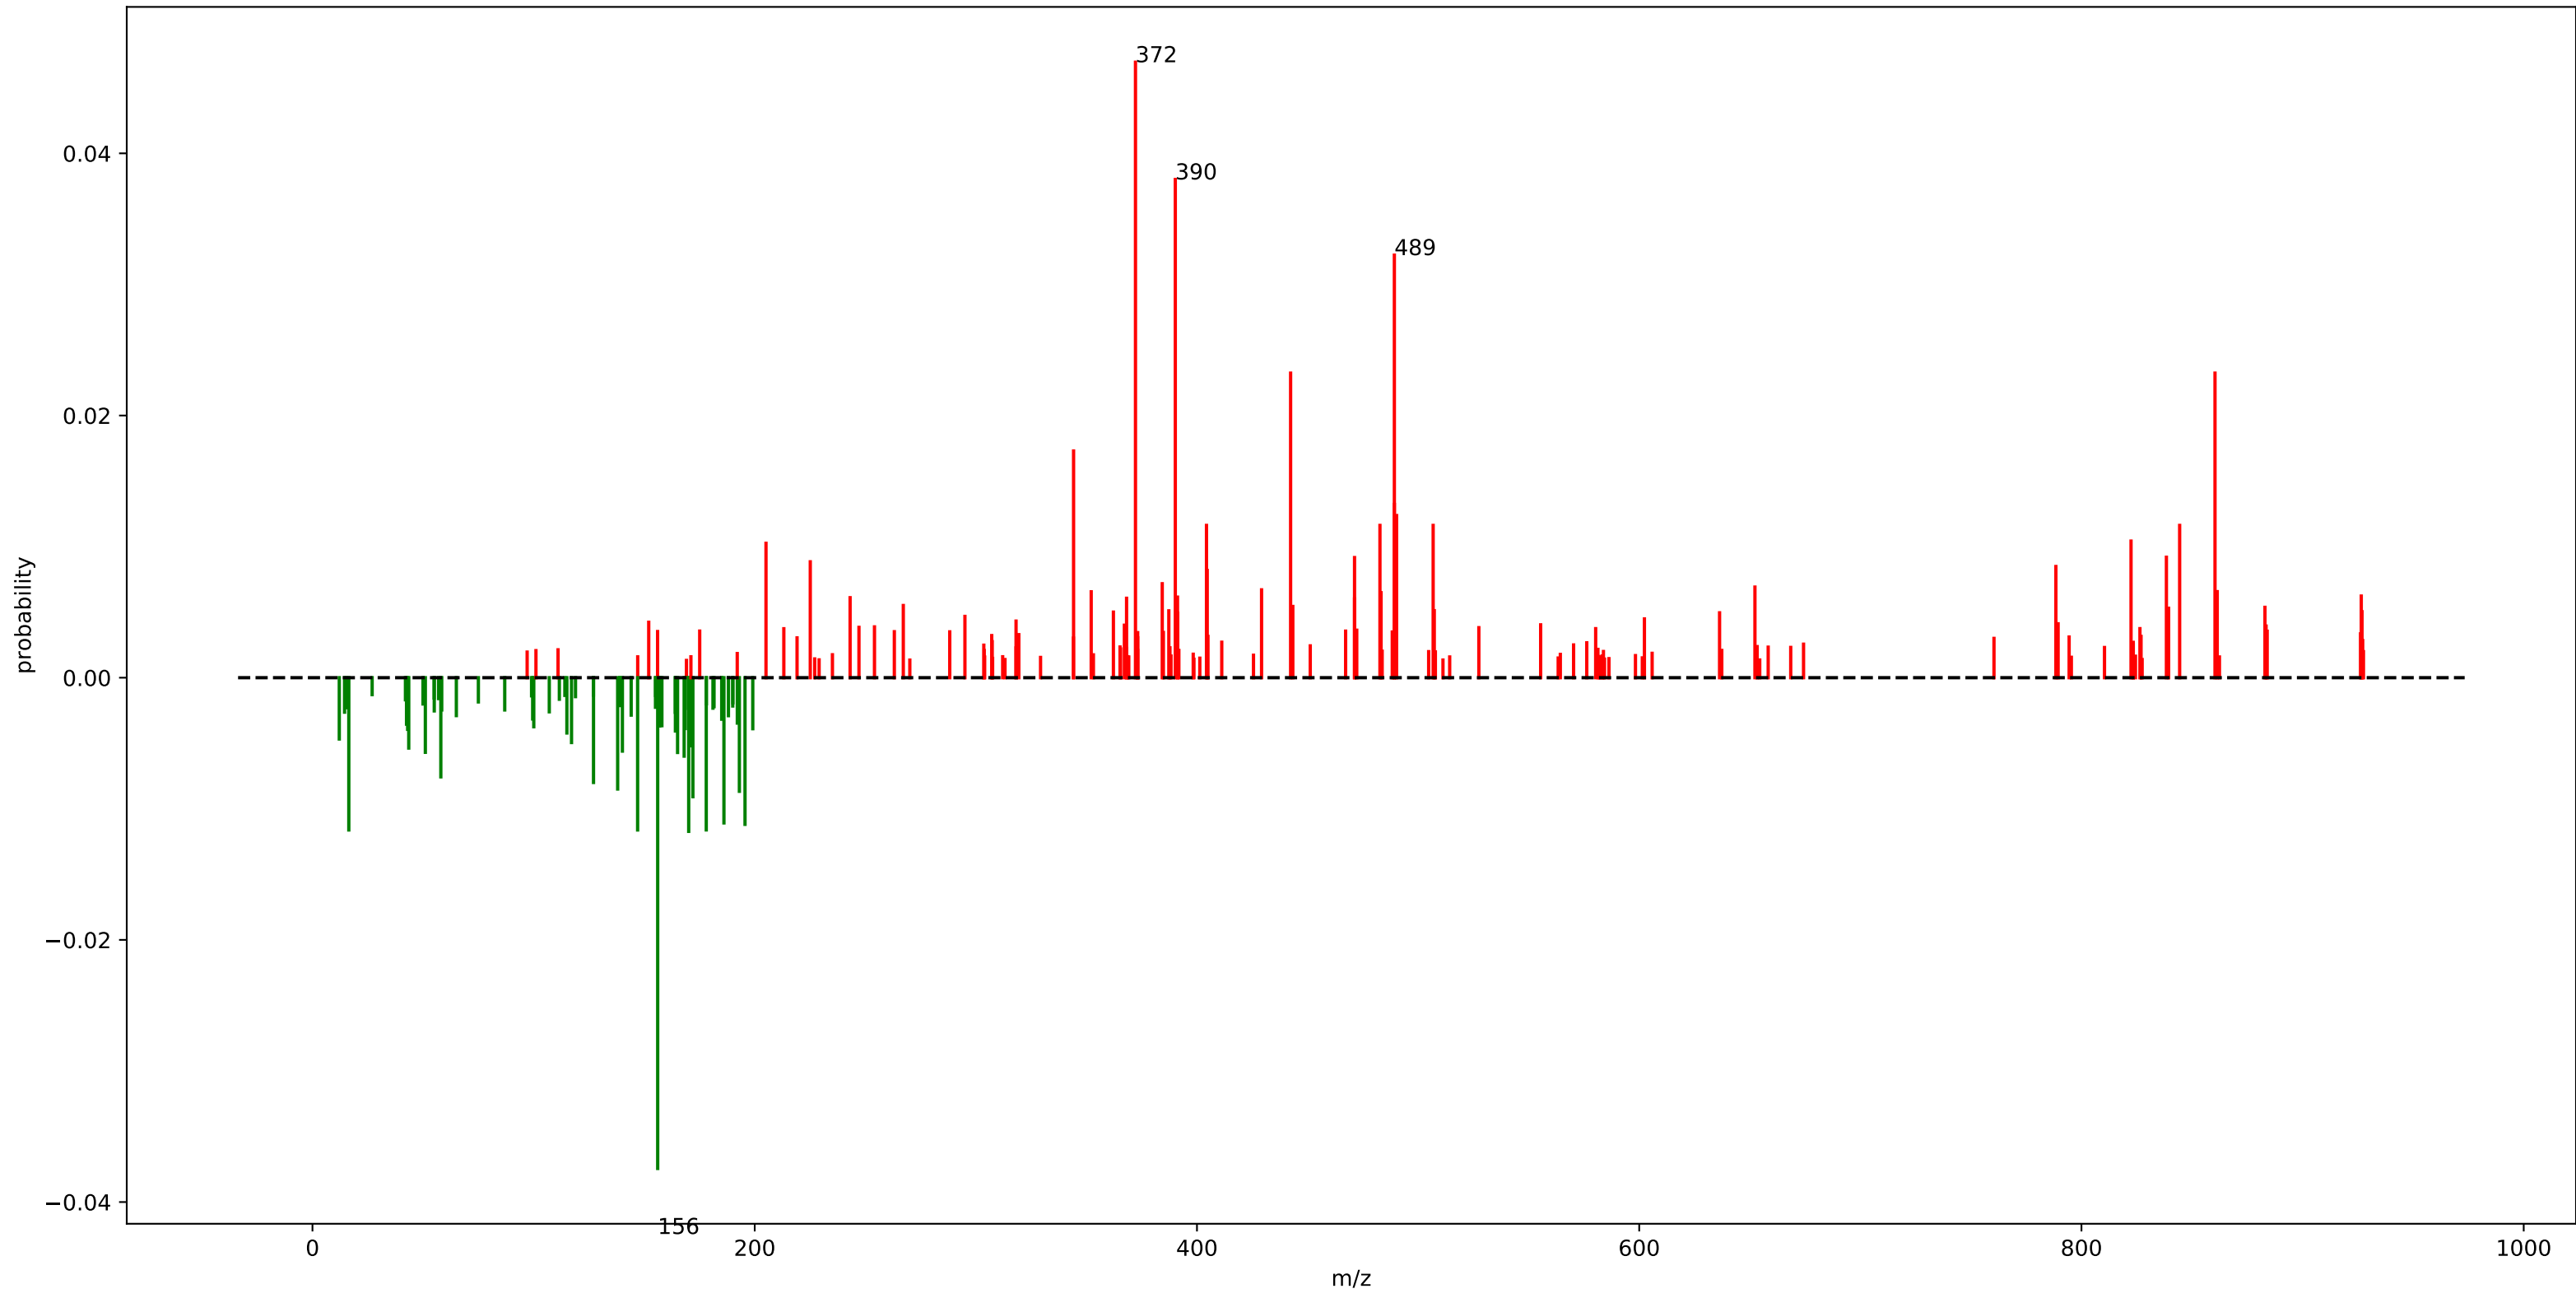

# rhabdus\_motif\_162.m2m

|                   |        |                   |        |                   |        |
|-------------------|--------|-------------------|--------|-------------------|--------|
| fragment_372.1925 | : 0.05 | fragment_205.0975 | : 0.01 | fragment_368.1625 | : 0.01 |
| fragment_390.2025 | : 0.04 | fragment_838.4125 | : 0.01 | fragment_471.2625 | : 0.01 |
| loss_156.1225     | : 0.04 | fragment_471.2575 | : 0.01 | loss_168.0875     | : 0.01 |
| fragment_489.2675 | : 0.03 | loss_172.0375     | : 0.01 | loss_165.1125     | : 0.01 |
| fragment_860.3925 | : 0.02 | fragment_225.1225 | : 0.01 | loss_51.0425      | : 0.01 |
| fragment_442.3475 | : 0.02 | loss_193.0575     | : 0.01 | loss_140.1625     | : 0.01 |
| fragment_344.1975 | : 0.02 | loss_138.0175     | : 0.01 | fragment_267.1925 | : 0.01 |
| fragment_489.2725 | : 0.01 | fragment_788.4325 | : 0.01 | fragment_443.3525 | : 0.01 |
| fragment_490.2725 | : 0.01 | fragment_404.6375 | : 0.01 | loss_43.5375      | : 0.01 |
| loss_170.1425     | : 0.01 | loss_127.0975     | : 0.01 | fragment_882.9825 | : 0.01 |
| fragment_506.8125 | : 0.01 | loss_58.0475      | : 0.01 | fragment_839.4175 | : 0.01 |
| fragment_404.3025 | : 0.01 | fragment_384.2975 | : 0.01 | loss_171.1275     | : 0.01 |
| fragment_844.4025 | : 0.01 | fragment_652.3325 | : 0.01 | fragment_507.3175 | : 0.01 |
| fragment_482.7475 | : 0.01 | fragment_429.2125 | : 0.01 | fragment_387.2725 | : 0.01 |
| loss_147.0425     | : 0.01 | fragment_861.3975 | : 0.01 | fragment_926.8725 | : 0.01 |
| loss_16.4325      | : 0.01 | fragment_352.1675 | : 0.01 | fragment_362.2075 | : 0.01 |
| loss_178.0825     | : 0.01 | fragment_483.2525 | : 0.01 |                   |        |
| loss_195.6125     | : 0.01 | fragment_926.5325 | : 0.01 |                   |        |
| loss_186.0775     | : 0.01 | fragment_391.2025 | : 0.01 |                   |        |
| fragment_822.4175 | : 0.01 | fragment_243.1325 | : 0.01 |                   |        |

urine\_mass2motif\_176.m2m

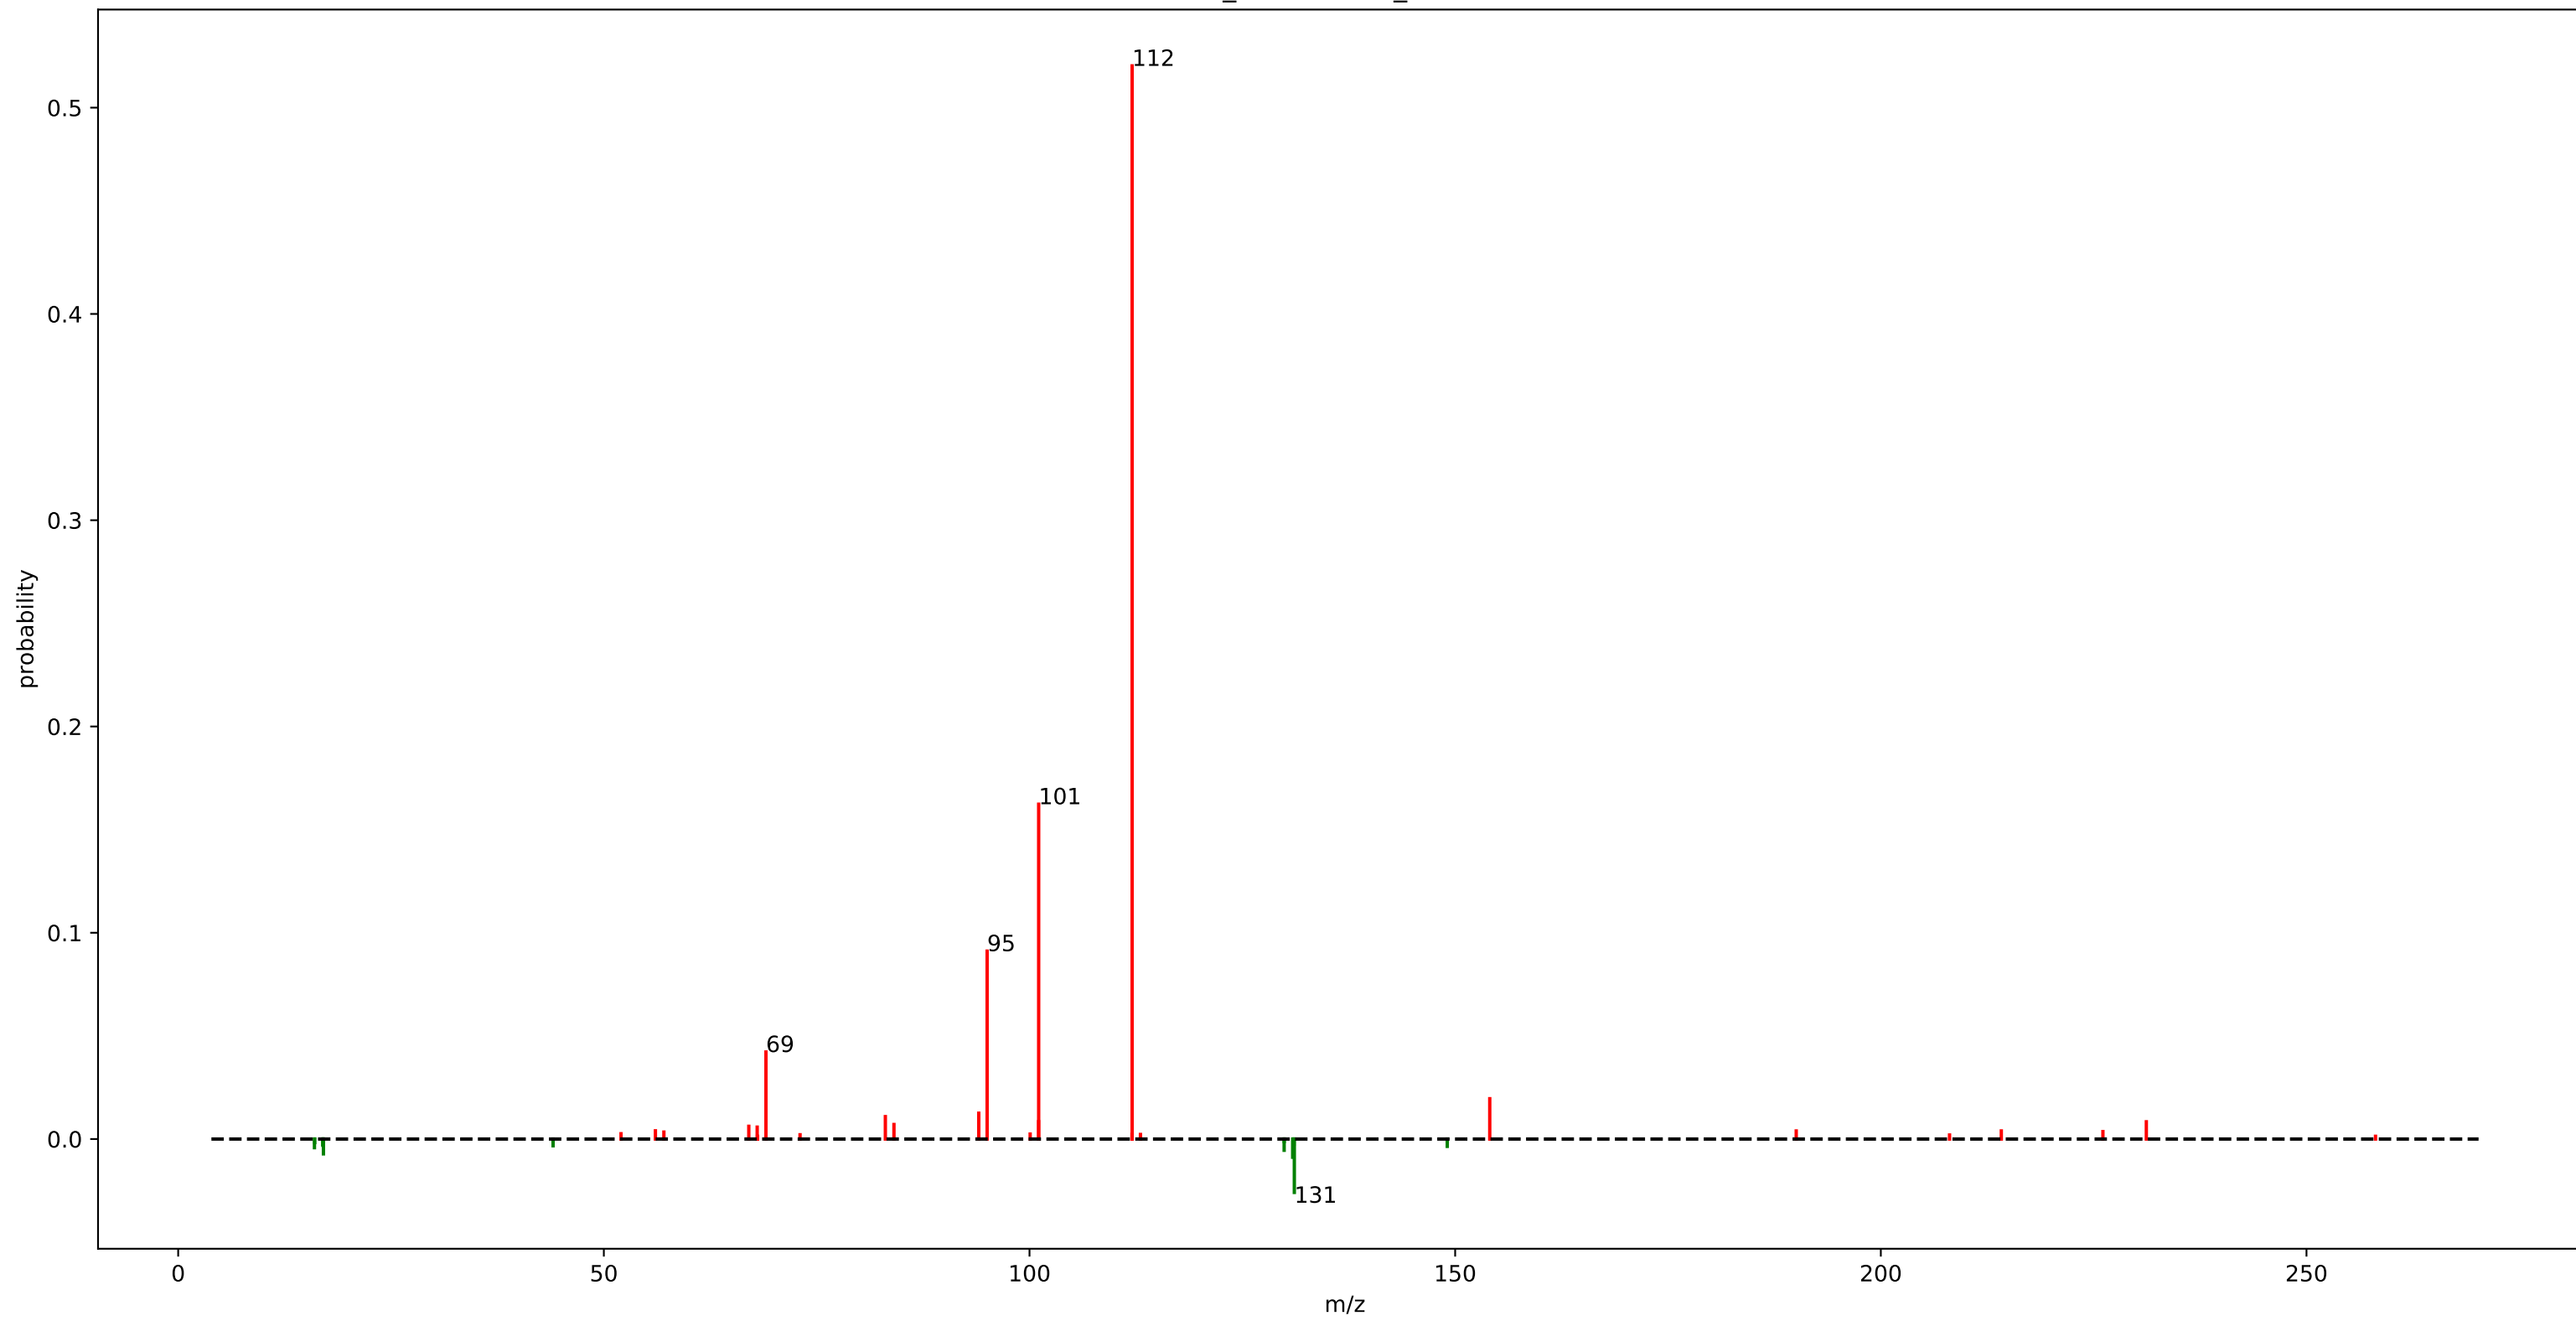

## urine\_mass2motif\_176.m2m

|                   |        |
|-------------------|--------|
| fragment_112.0525 | : 0.52 |
| fragment_101.0775 | : 0.16 |
| fragment_95.0225  | : 0.09 |
| fragment_69.0425  | : 0.04 |
| loss_131.1075     | : 0.03 |
| fragment_154.0625 | : 0.02 |
| fragment_94.0425  | : 0.01 |
| fragment_83.0675  | : 0.01 |
| loss_130.9125     | : 0.01 |
| fragment_101.0725 | : 0.01 |
| fragment_231.1875 | : 0.01 |
| loss_17.0625      | : 0.01 |
| fragment_84.0775  | : 0.01 |
| fragment_67.0275  | : 0.01 |
| fragment_68.0125  | : 0.01 |
| loss_129.9125     | : 0.01 |

rhabdus\_motif\_106.m2m

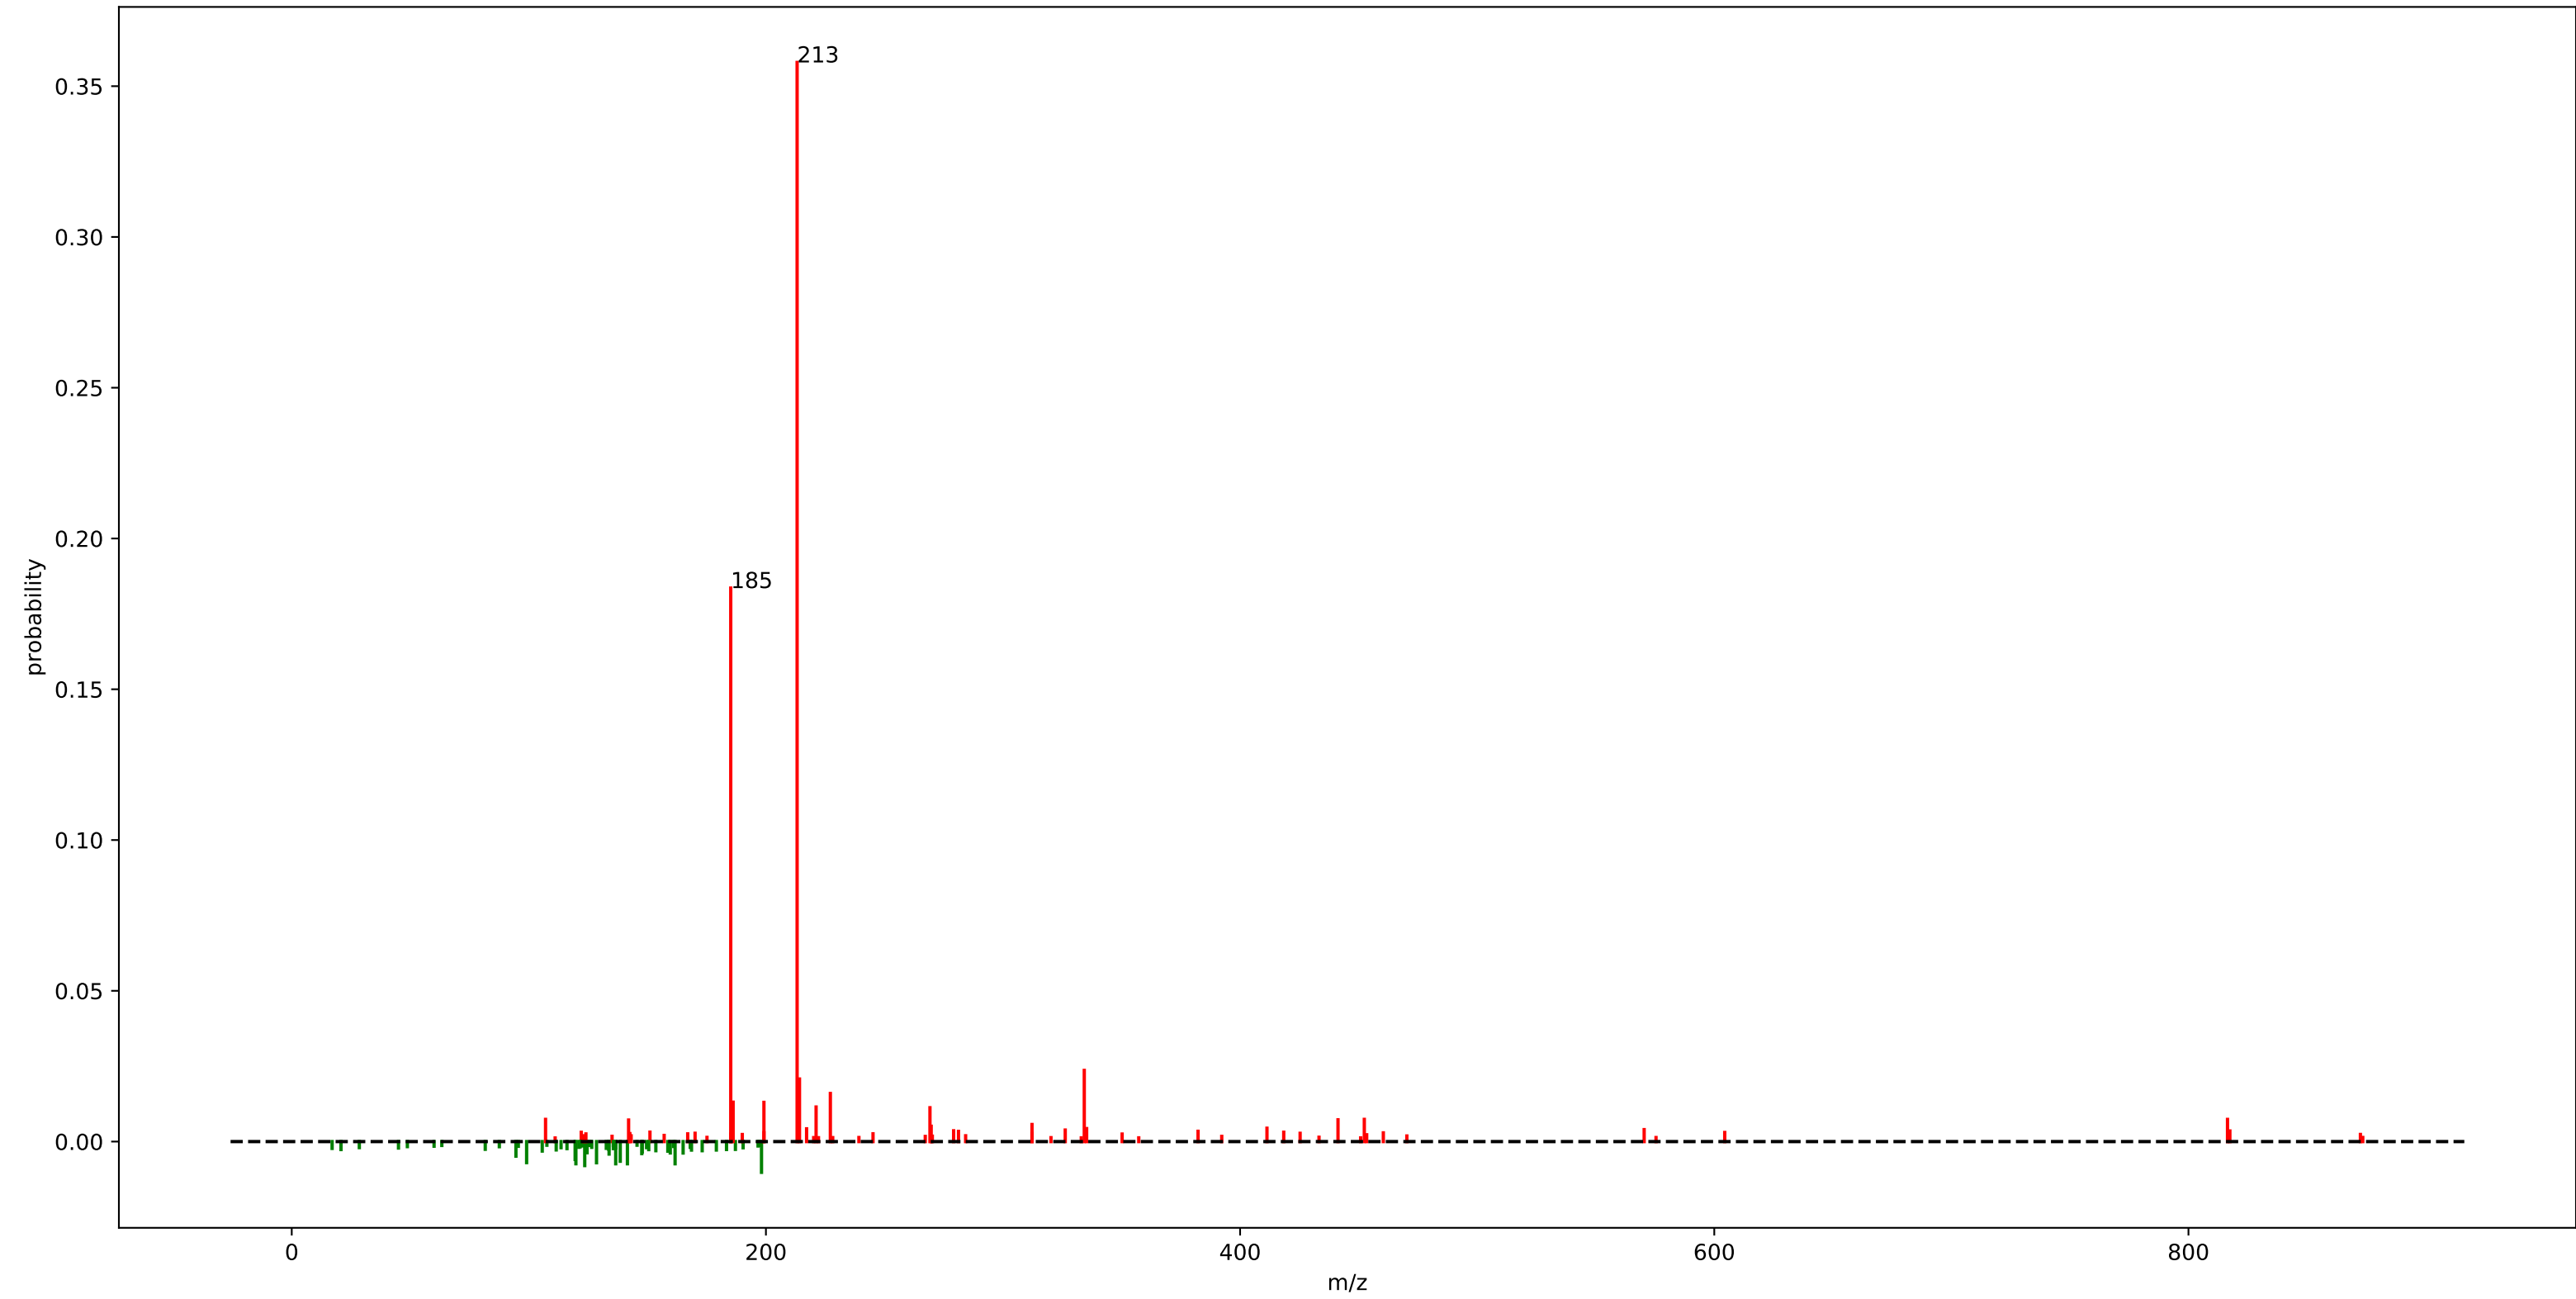

## rhabdus\_motif\_106.m2m

|                   |        |                   |        |
|-------------------|--------|-------------------|--------|
| fragment_213.1575 | : 0.36 | loss_128.5525     | : 0.01 |
| fragment_185.1625 | : 0.18 | loss_99.0675      | : 0.01 |
| fragment_334.2725 | : 0.02 | loss_138.5625     | : 0.01 |
| fragment_214.1625 | : 0.02 | loss_119.5325     | : 0.01 |
| fragment_227.1775 | : 0.02 | fragment_312.2275 | : 0.01 |
| fragment_186.1675 | : 0.01 | fragment_269.7025 | : 0.01 |
| fragment_199.1575 | : 0.01 |                   |        |
| fragment_221.1625 | : 0.01 |                   |        |
| fragment_269.1875 | : 0.01 |                   |        |
| loss_198.1375     | : 0.01 |                   |        |
| loss_123.5825     | : 0.01 |                   |        |
| fragment_452.3875 | : 0.01 |                   |        |
| loss_161.6875     | : 0.01 |                   |        |
| loss_141.5775     | : 0.01 |                   |        |
| fragment_107.0525 | : 0.01 |                   |        |
| loss_136.6425     | : 0.01 |                   |        |
| loss_119.8475     | : 0.01 |                   |        |
| fragment_816.4675 | : 0.01 |                   |        |
| fragment_441.2925 | : 0.01 |                   |        |
| fragment_142.0825 | : 0.01 |                   |        |



rhamn\_motif\_168.m2m

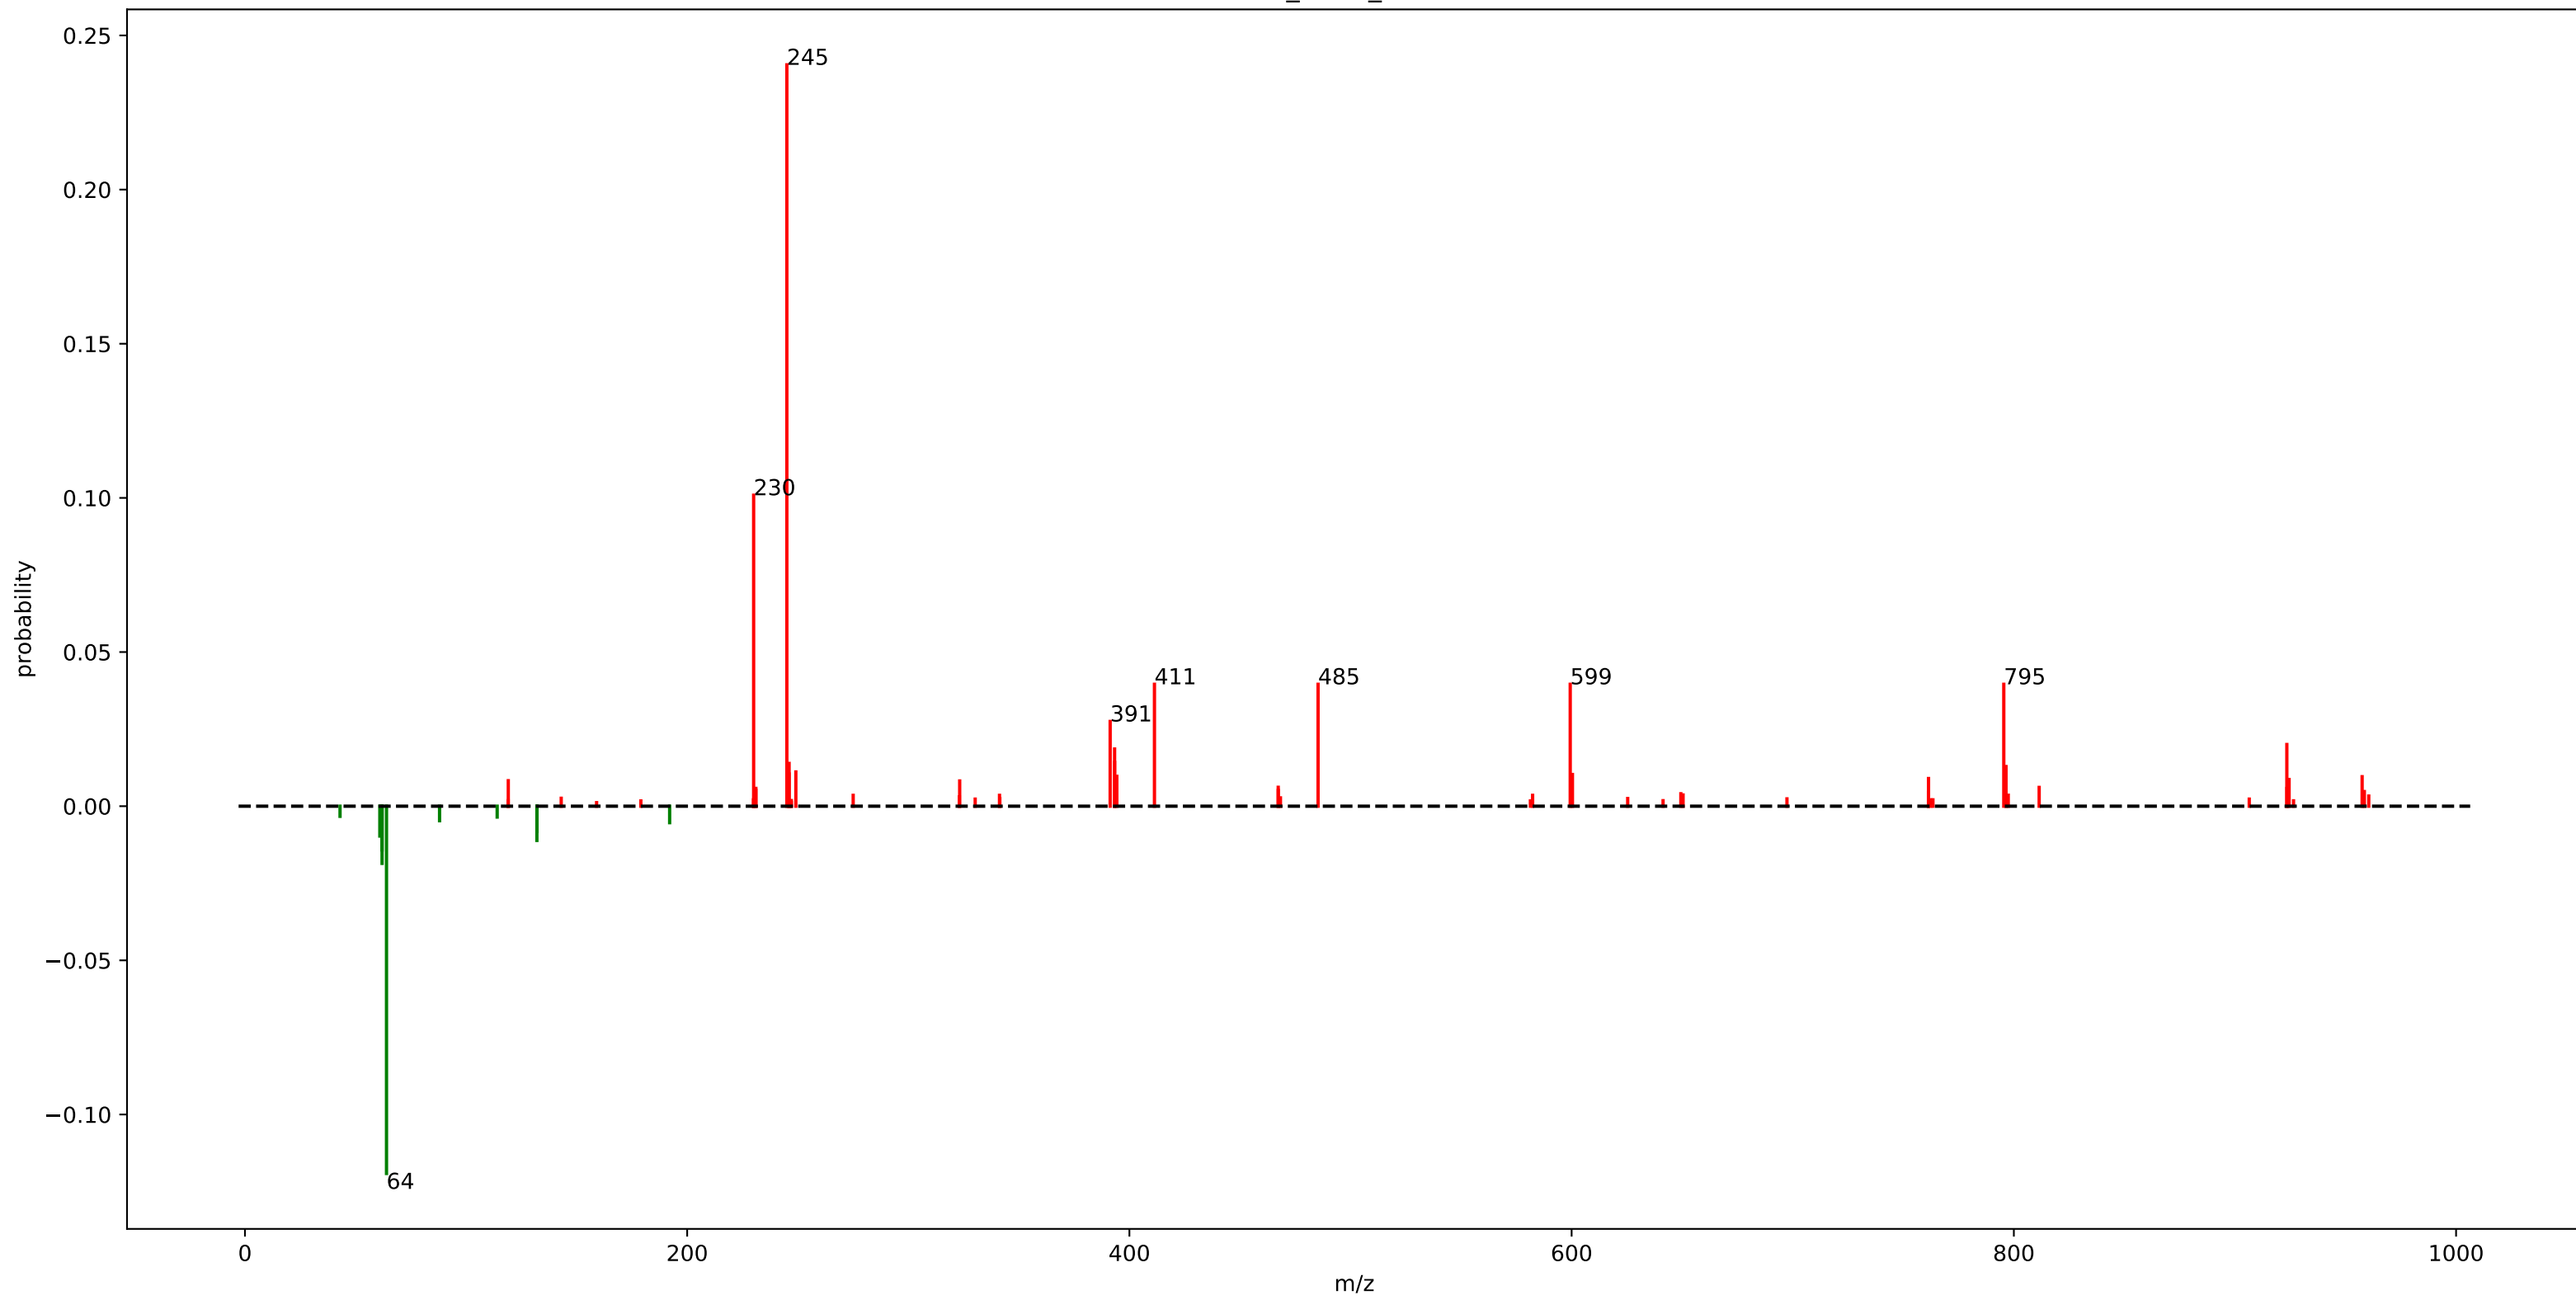

# rhamn\_motif\_168.m2m

|                   |        |                   |        |
|-------------------|--------|-------------------|--------|
| fragment_245.0825 | : 0.24 | loss_61.0025      | : 0.01 |
| loss_64.0175      | : 0.12 | fragment_957.5075 | : 0.01 |
| fragment_230.0575 | : 0.10 | fragment_761.4125 | : 0.01 |
| fragment_485.3225 | : 0.04 | fragment_924.4725 | : 0.01 |
| fragment_411.3275 | : 0.04 | fragment_119.0925 | : 0.01 |
| fragment_599.3625 | : 0.04 | loss_132.0775     | : 0.01 |
| fragment_795.4475 | : 0.04 | fragment_323.2425 | : 0.01 |
| fragment_391.2975 | : 0.03 | fragment_467.3025 | : 0.01 |
| fragment_923.4625 | : 0.02 | fragment_811.4475 | : 0.01 |
| fragment_393.3025 | : 0.02 | fragment_231.0575 | : 0.01 |
| loss_62.0125      | : 0.02 | fragment_923.4875 | : 0.01 |
| fragment_393.3225 | : 0.01 | loss_192.0675     | : 0.01 |
| loss_61.9925      | : 0.01 | fragment_231.0625 | : 0.01 |
| fragment_246.0875 | : 0.01 | fragment_467.3175 | : 0.01 |
| fragment_796.4525 | : 0.01 |                   |        |
| loss_132.0325     | : 0.01 |                   |        |
| fragment_249.1425 | : 0.01 |                   |        |
| fragment_246.0825 | : 0.01 |                   |        |
| fragment_600.3675 | : 0.01 |                   |        |
| fragment_394.3125 | : 0.01 |                   |        |

urine\_mass2motif\_268.m2m

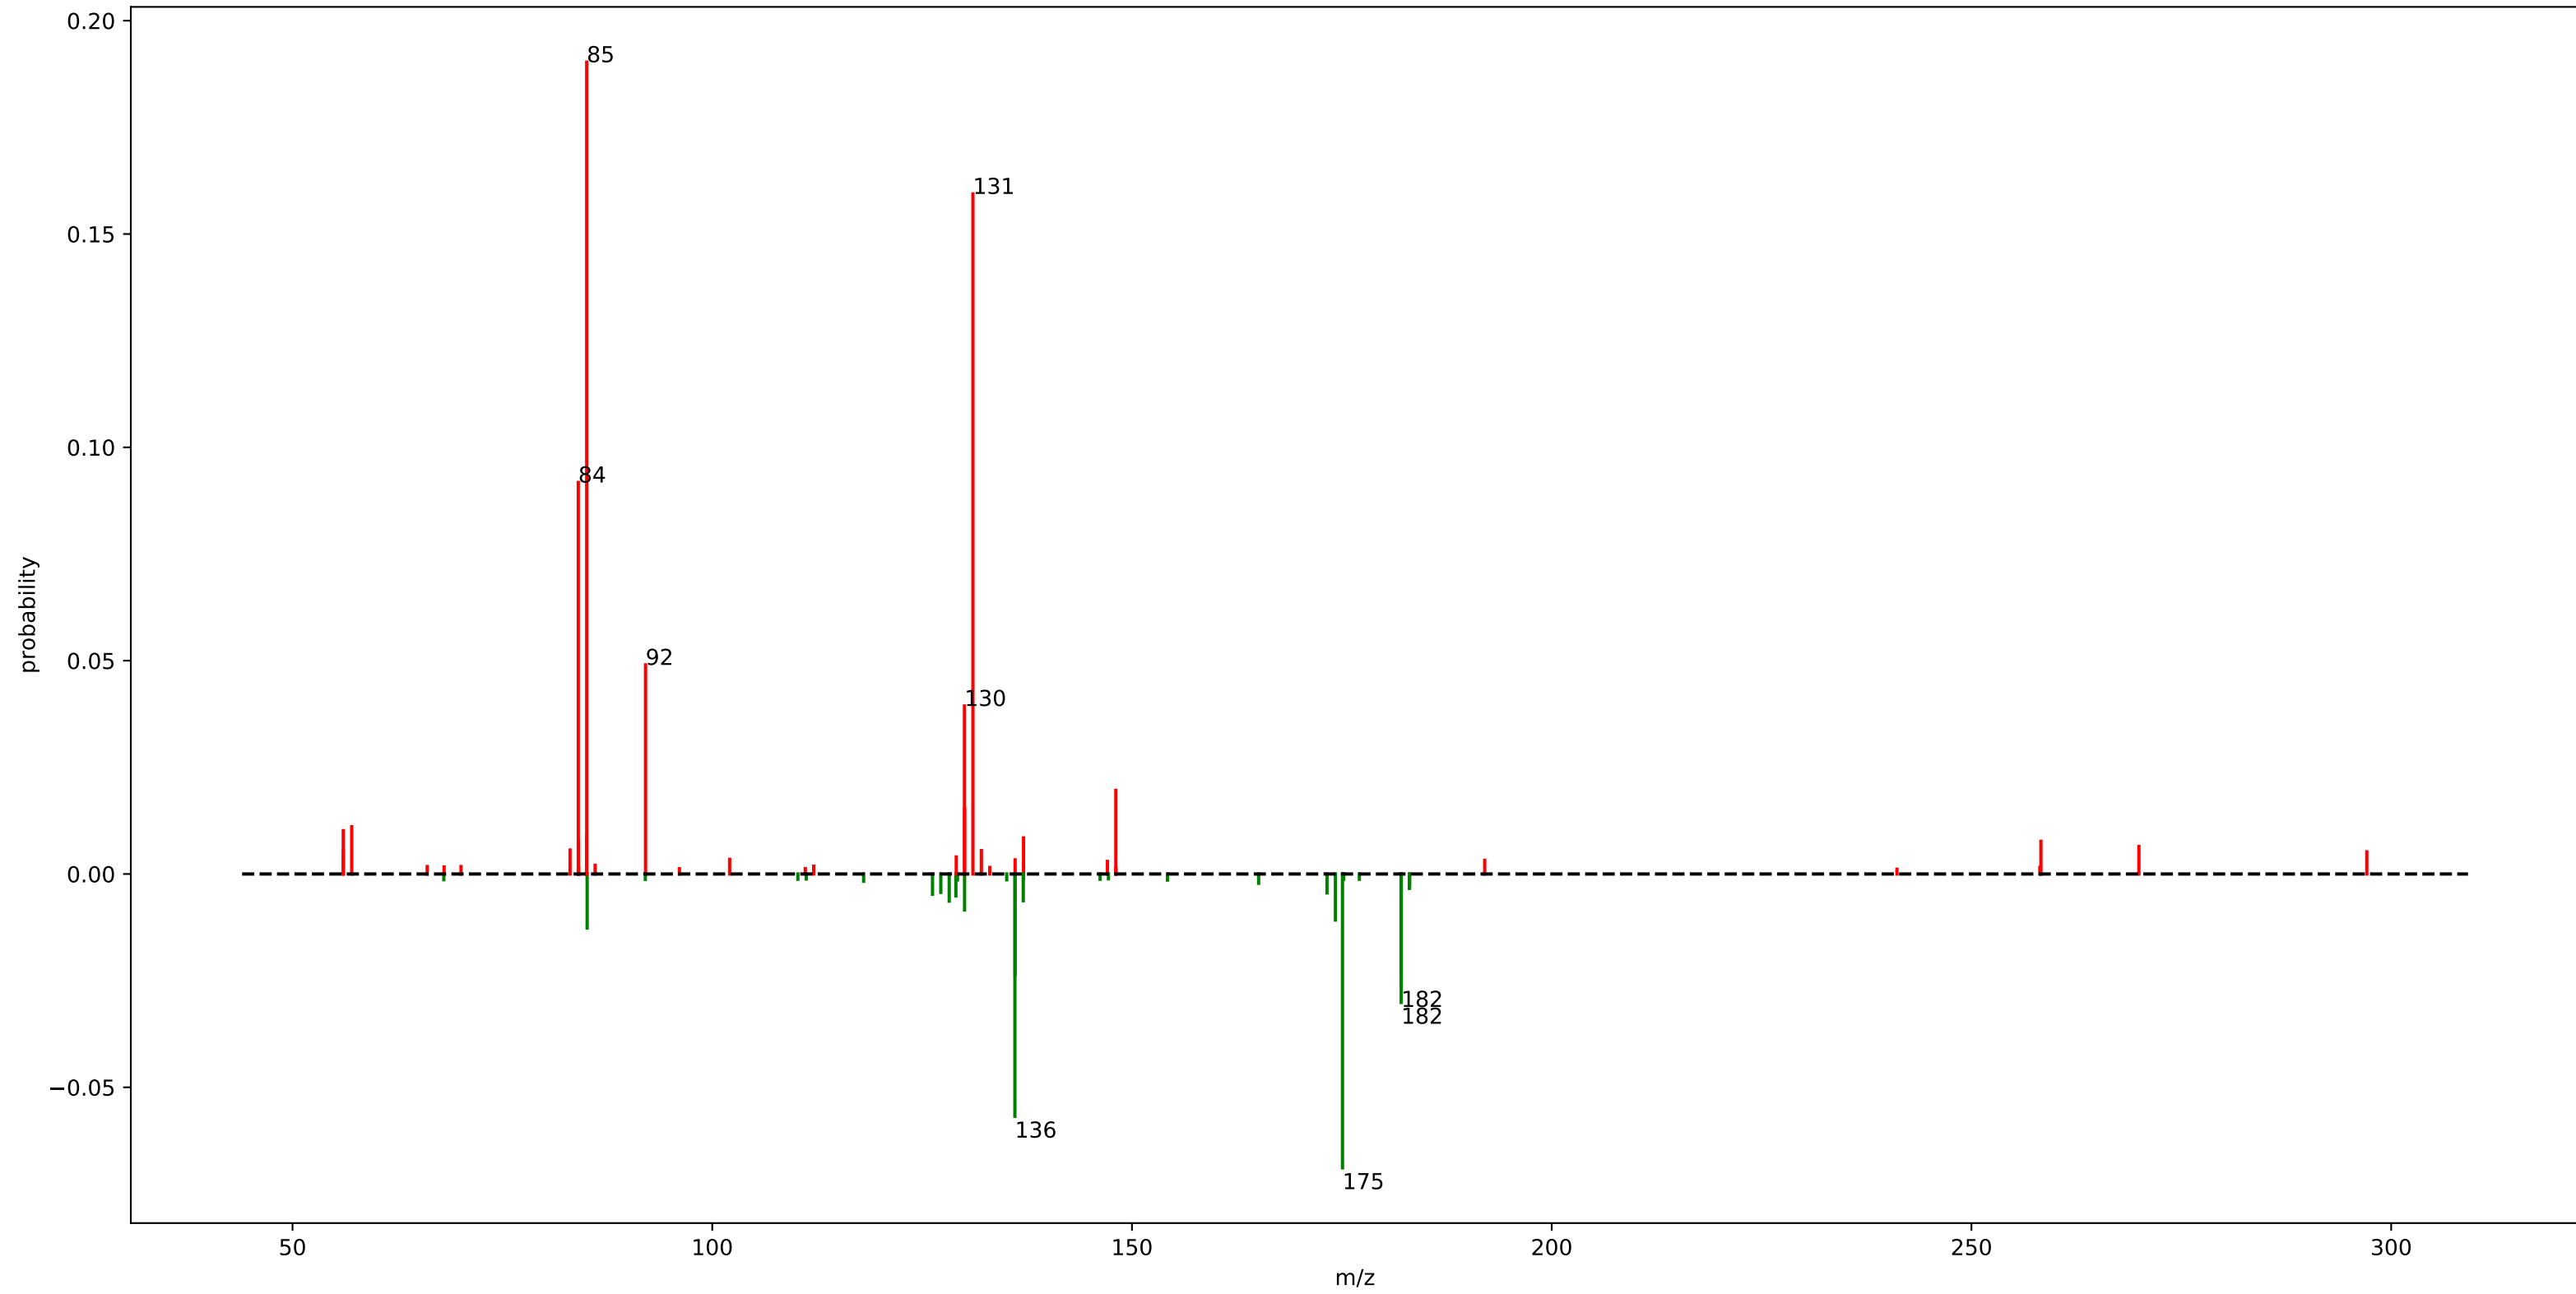

# urine\_mass2motif\_268.m2m

|                   |        |                   |        |
|-------------------|--------|-------------------|--------|
| fragment_85.0475  | : 0.19 | fragment_84.0625  | : 0.01 |
| fragment_131.0525 | : 0.16 | fragment_258.2775 | : 0.01 |
| fragment_84.0425  | : 0.09 | fragment_269.9475 | : 0.01 |
| loss_175.0775     | : 0.07 | loss_128.2275     | : 0.01 |
| loss_136.0525     | : 0.06 | loss_137.0475     | : 0.01 |
| fragment_92.0575  | : 0.05 | fragment_83.0625  | : 0.01 |
| fragment_130.0475 | : 0.04 | fragment_132.0575 | : 0.01 |
| loss_182.0675     | : 0.03 | fragment_56.0575  | : 0.01 |
| loss_182.0775     | : 0.03 | fragment_297.0975 | : 0.01 |
| loss_136.0775     | : 0.02 | loss_129.0225     | : 0.01 |
| loss_182.0575     | : 0.02 |                   |        |
| fragment_148.0775 | : 0.02 |                   |        |
| fragment_130.0675 | : 0.02 |                   |        |
| loss_85.0975      | : 0.01 |                   |        |
| fragment_57.0525  | : 0.01 |                   |        |
| loss_174.2325     | : 0.01 |                   |        |
| fragment_56.0475  | : 0.01 |                   |        |
| fragment_85.0425  | : 0.01 |                   |        |
| fragment_137.0825 | : 0.01 |                   |        |
| loss_130.0575     | : 0.01 |                   |        |

urine\_mass2motif\_210.m2m

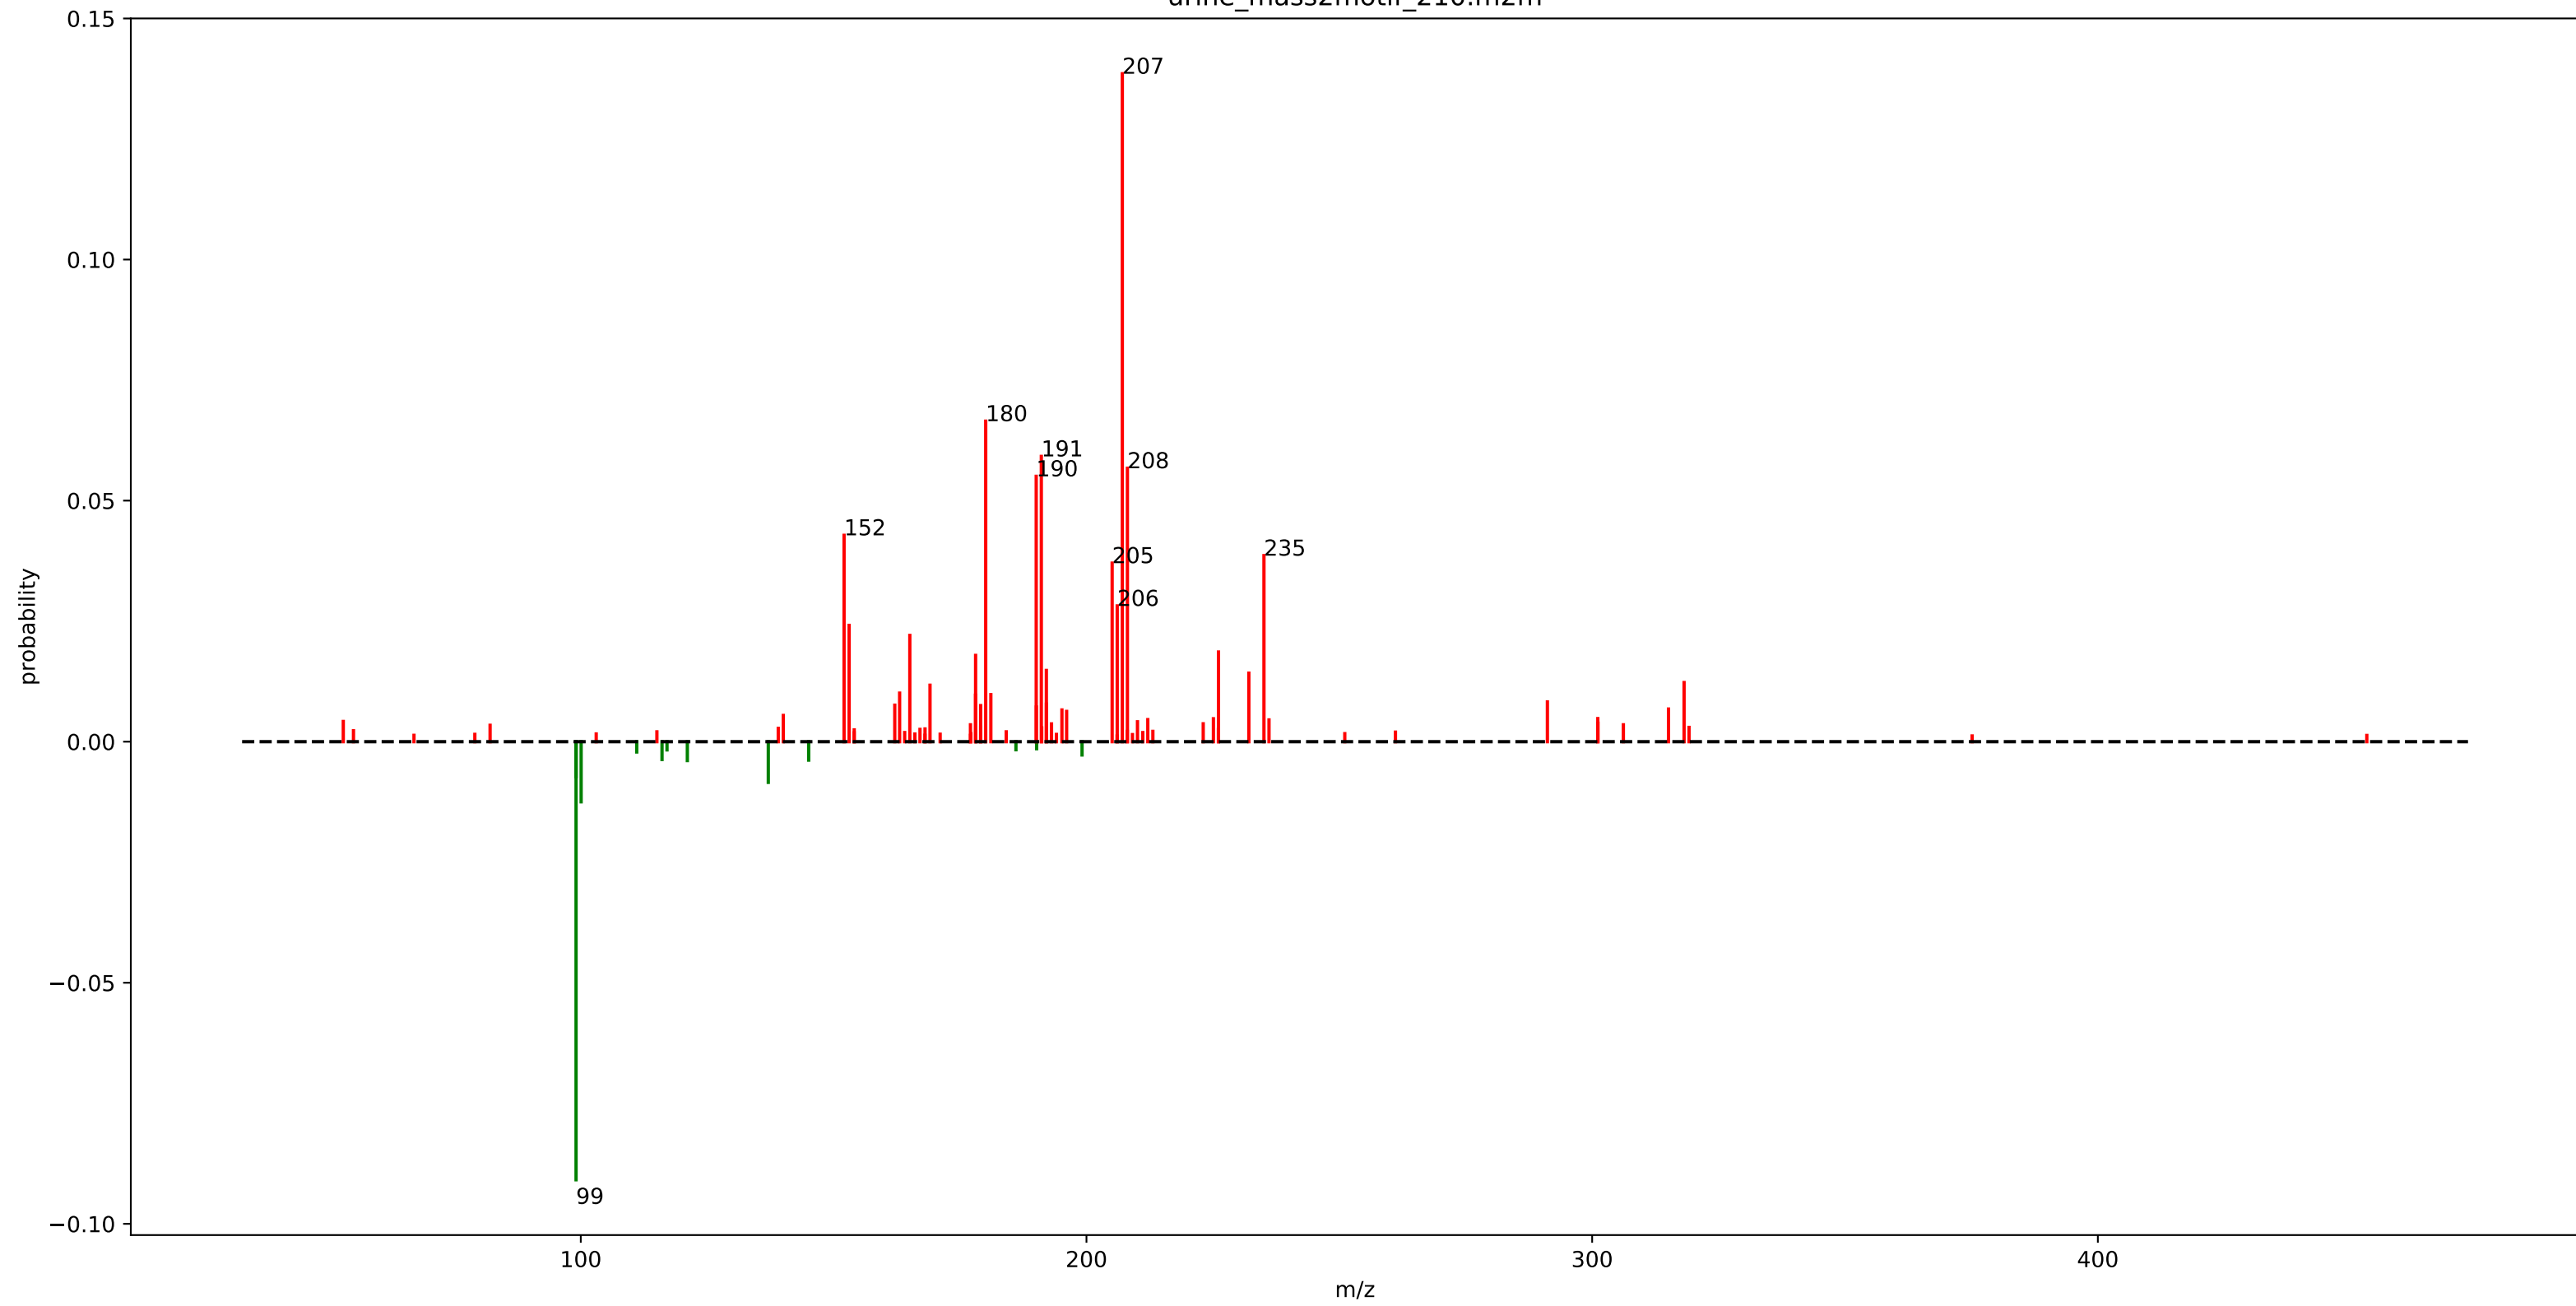

# urine\_mass2motif\_210.m2m

|                   |        |                   |        |
|-------------------|--------|-------------------|--------|
| fragment_207.0925 | : 0.14 | fragment_181.0925 | : 0.01 |
| loss_99.0675      | : 0.09 | fragment_178.0625 | : 0.01 |
| fragment_180.0775 | : 0.07 | loss_137.0825     | : 0.01 |
| fragment_191.0725 | : 0.06 | fragment_291.1475 | : 0.01 |
| fragment_208.0975 | : 0.06 | fragment_192.0775 | : 0.01 |
| fragment_190.0625 | : 0.06 | fragment_162.0925 | : 0.01 |
| fragment_152.0675 | : 0.04 | fragment_179.0725 | : 0.01 |
| fragment_235.0975 | : 0.04 | loss_99.0775      | : 0.01 |
| fragment_205.0775 | : 0.04 | fragment_190.0875 | : 0.01 |
| fragment_206.0825 | : 0.03 | fragment_315.0975 | : 0.01 |
| fragment_153.0675 | : 0.02 | fragment_195.1475 | : 0.01 |
| fragment_165.0675 | : 0.02 | fragment_196.0775 | : 0.01 |
| fragment_226.1075 | : 0.02 | fragment_140.0525 | : 0.01 |
| fragment_178.0775 | : 0.02 |                   |        |
| fragment_192.0675 | : 0.01 |                   |        |
| fragment_232.1125 | : 0.01 |                   |        |
| loss_100.0725     | : 0.01 |                   |        |
| fragment_318.1775 | : 0.01 |                   |        |
| fragment_169.0625 | : 0.01 |                   |        |
| fragment_163.0525 | : 0.01 |                   |        |

StrepSalini\_motif\_3.m2m

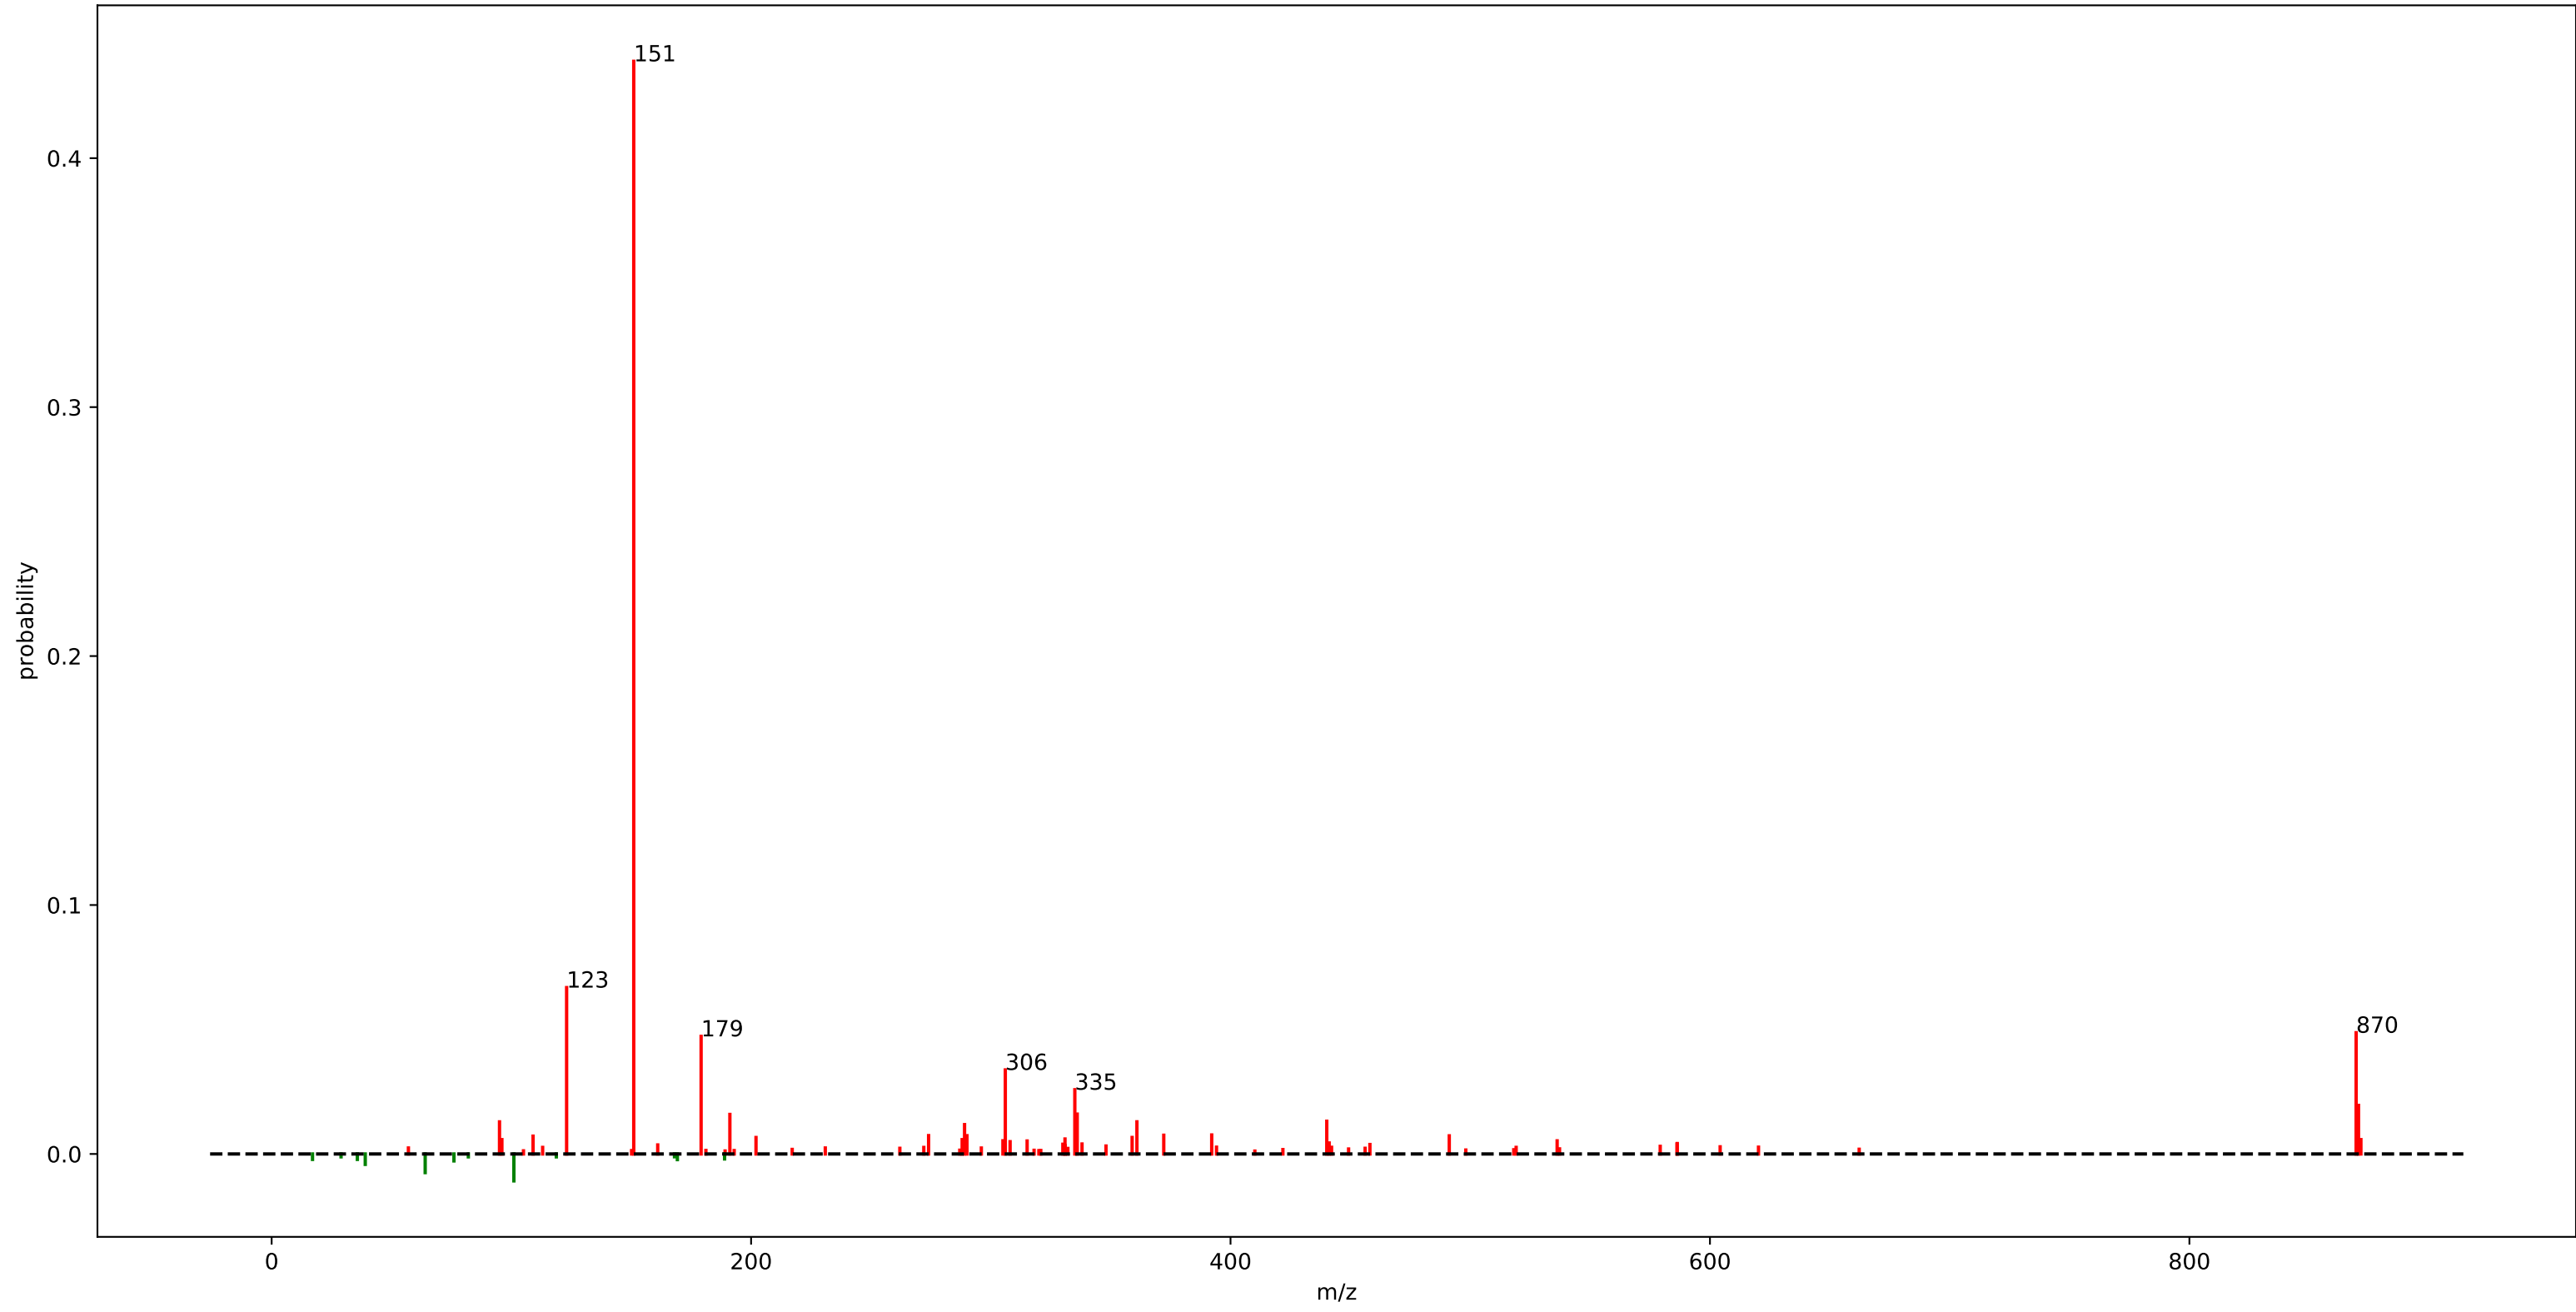

## StrepSalini\_motif\_3.m2m

|                   |        |                   |        |
|-------------------|--------|-------------------|--------|
| fragment_151.0500 | : 0.44 | fragment_109.0525 | : 0.01 |
| fragment_123.0500 | : 0.07 | fragment_358.9500 | : 0.01 |
| fragment_869.5500 | : 0.05 | fragment_202.0500 | : 0.01 |
| fragment_179.1500 | : 0.05 | fragment_330.9500 | : 0.01 |
| fragment_306.0500 | : 0.03 | fragment_871.5500 | : 0.01 |
| fragment_335.0500 | : 0.03 | fragment_96.0500  | : 0.01 |
| fragment_870.5500 | : 0.02 | fragment_288.0500 | : 0.01 |
| fragment_336.0500 | : 0.02 | fragment_305.0500 | : 0.01 |
| fragment_191.1500 | : 0.02 | fragment_536.2500 | : 0.01 |
| fragment_440.1500 | : 0.01 | fragment_315.1500 | : 0.01 |
| fragment_360.9500 | : 0.01 |                   |        |
| fragment_95.0500  | : 0.01 |                   |        |
| fragment_289.0500 | : 0.01 |                   |        |
| loss_101.0500     | : 0.01 |                   |        |
| fragment_392.1500 | : 0.01 |                   |        |
| fragment_372.1500 | : 0.01 |                   |        |
| loss_64.0475      | : 0.01 |                   |        |
| fragment_274.0500 | : 0.01 |                   |        |
| fragment_290.0500 | : 0.01 |                   |        |
| fragment_491.2500 | : 0.01 |                   |        |



gnps\_motif\_59.m2m

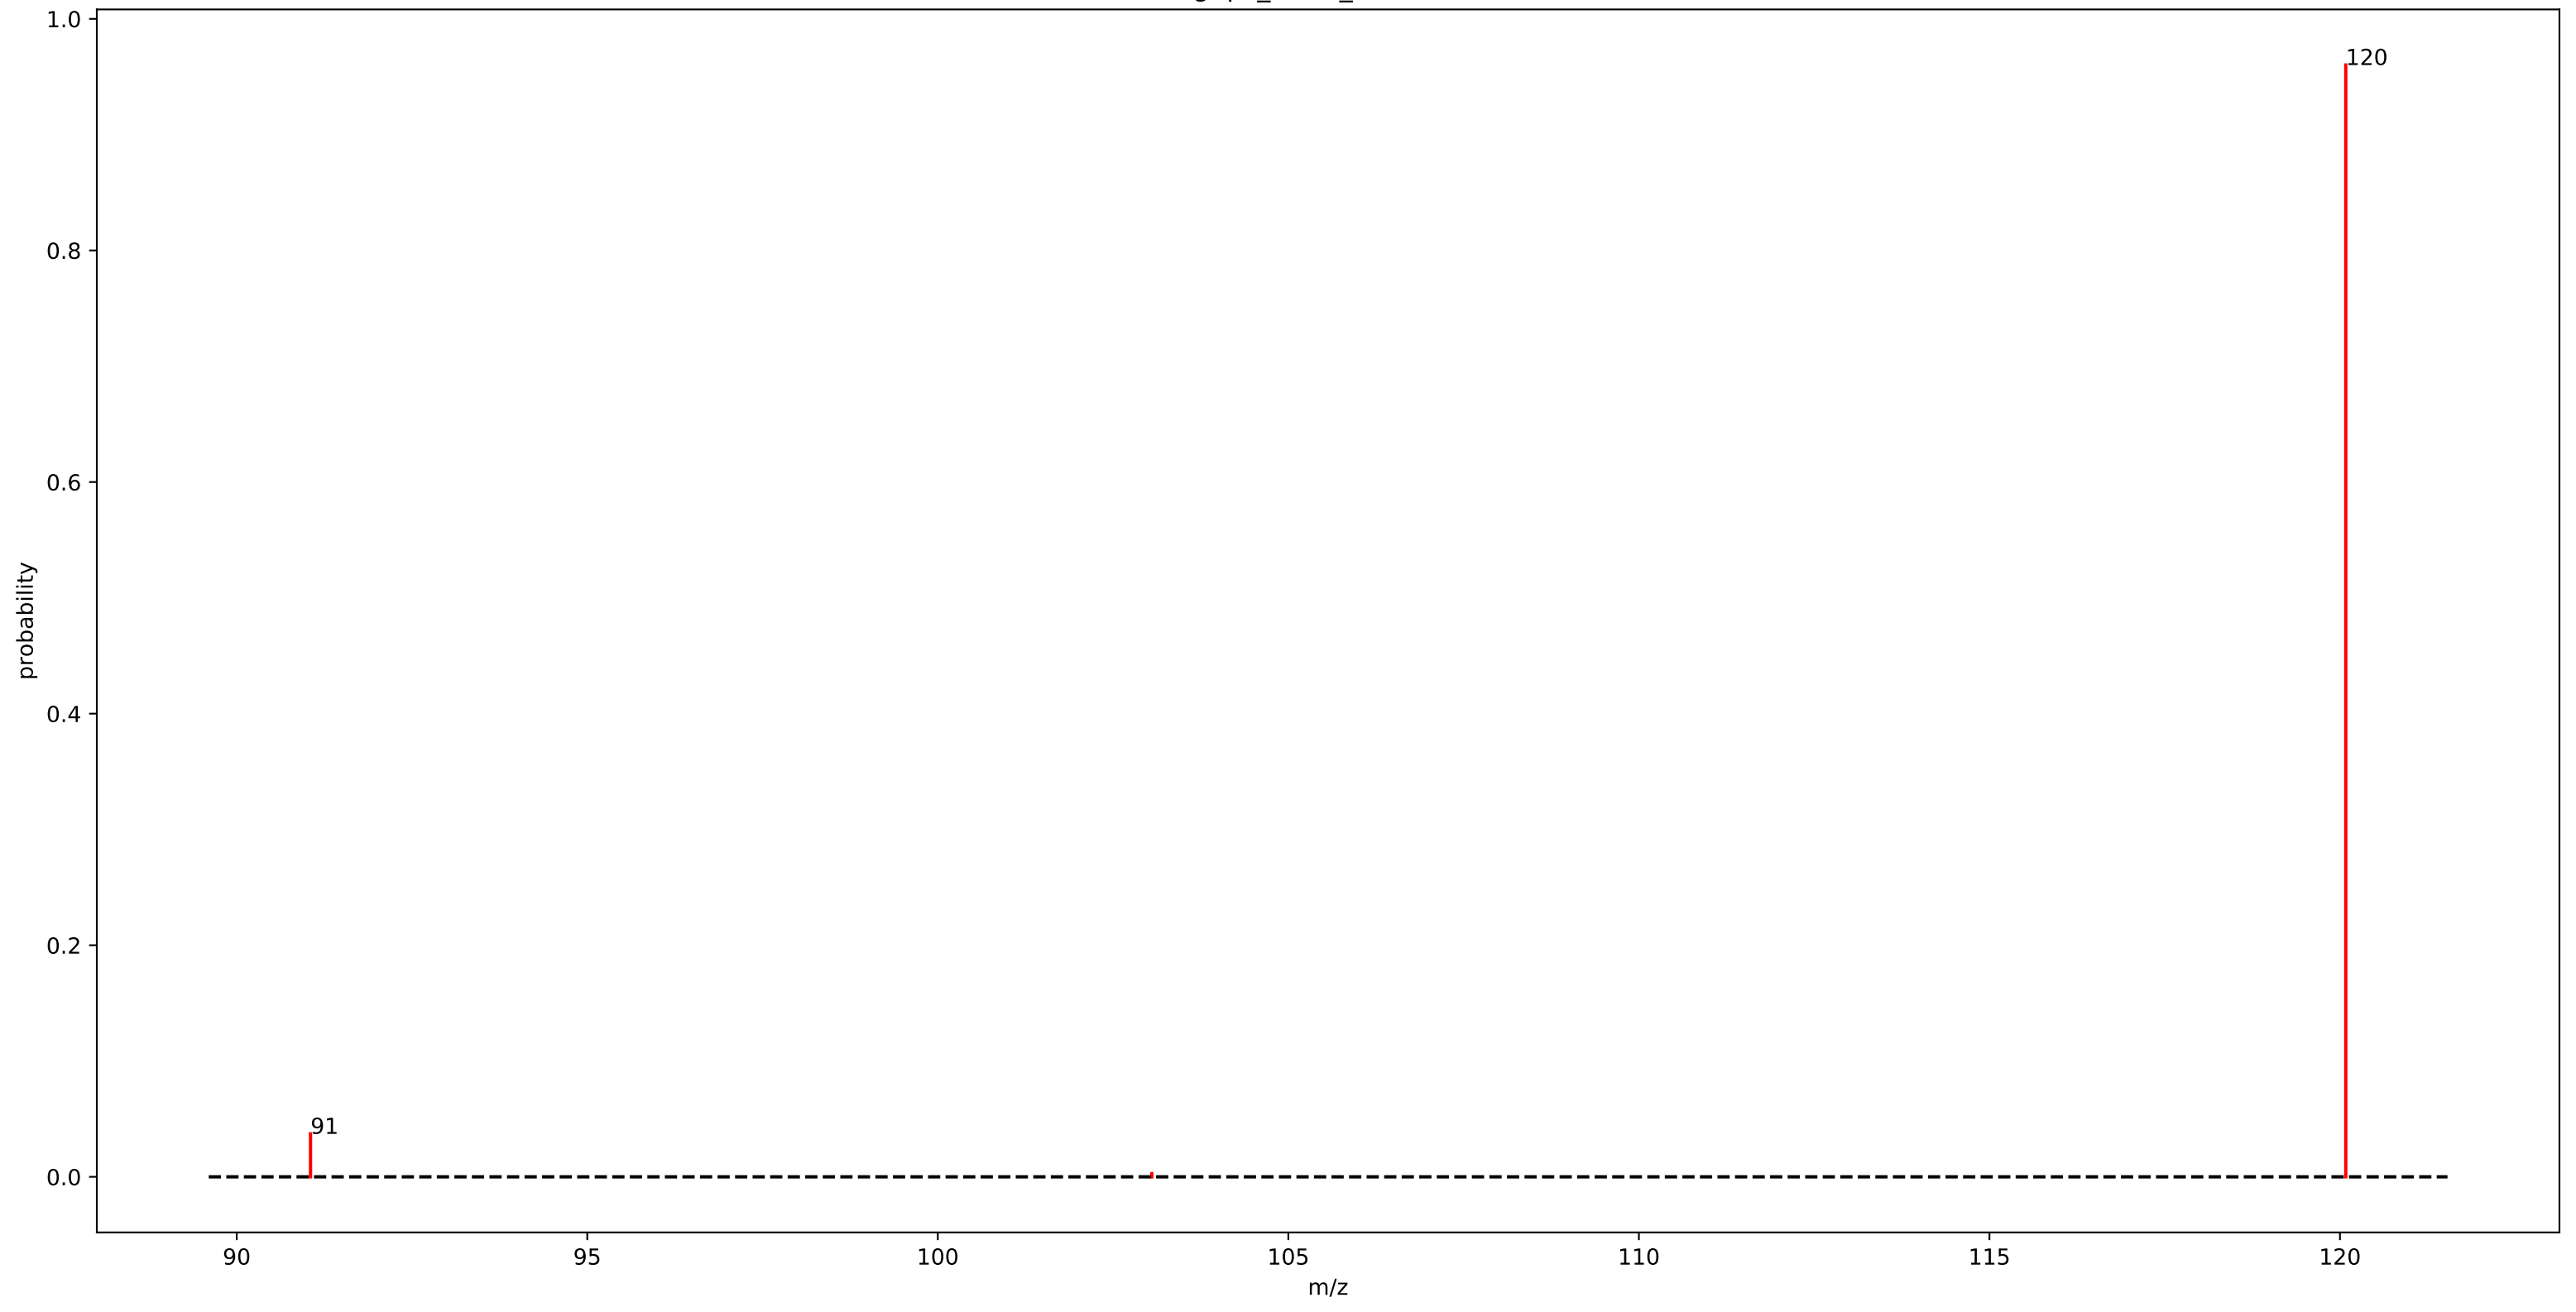

# gnps\_motif\_59.m2m

fragment\_120.0825 : 0.96  
fragment\_91.0525 : 0.04

gnps\_motif\_31.m2m

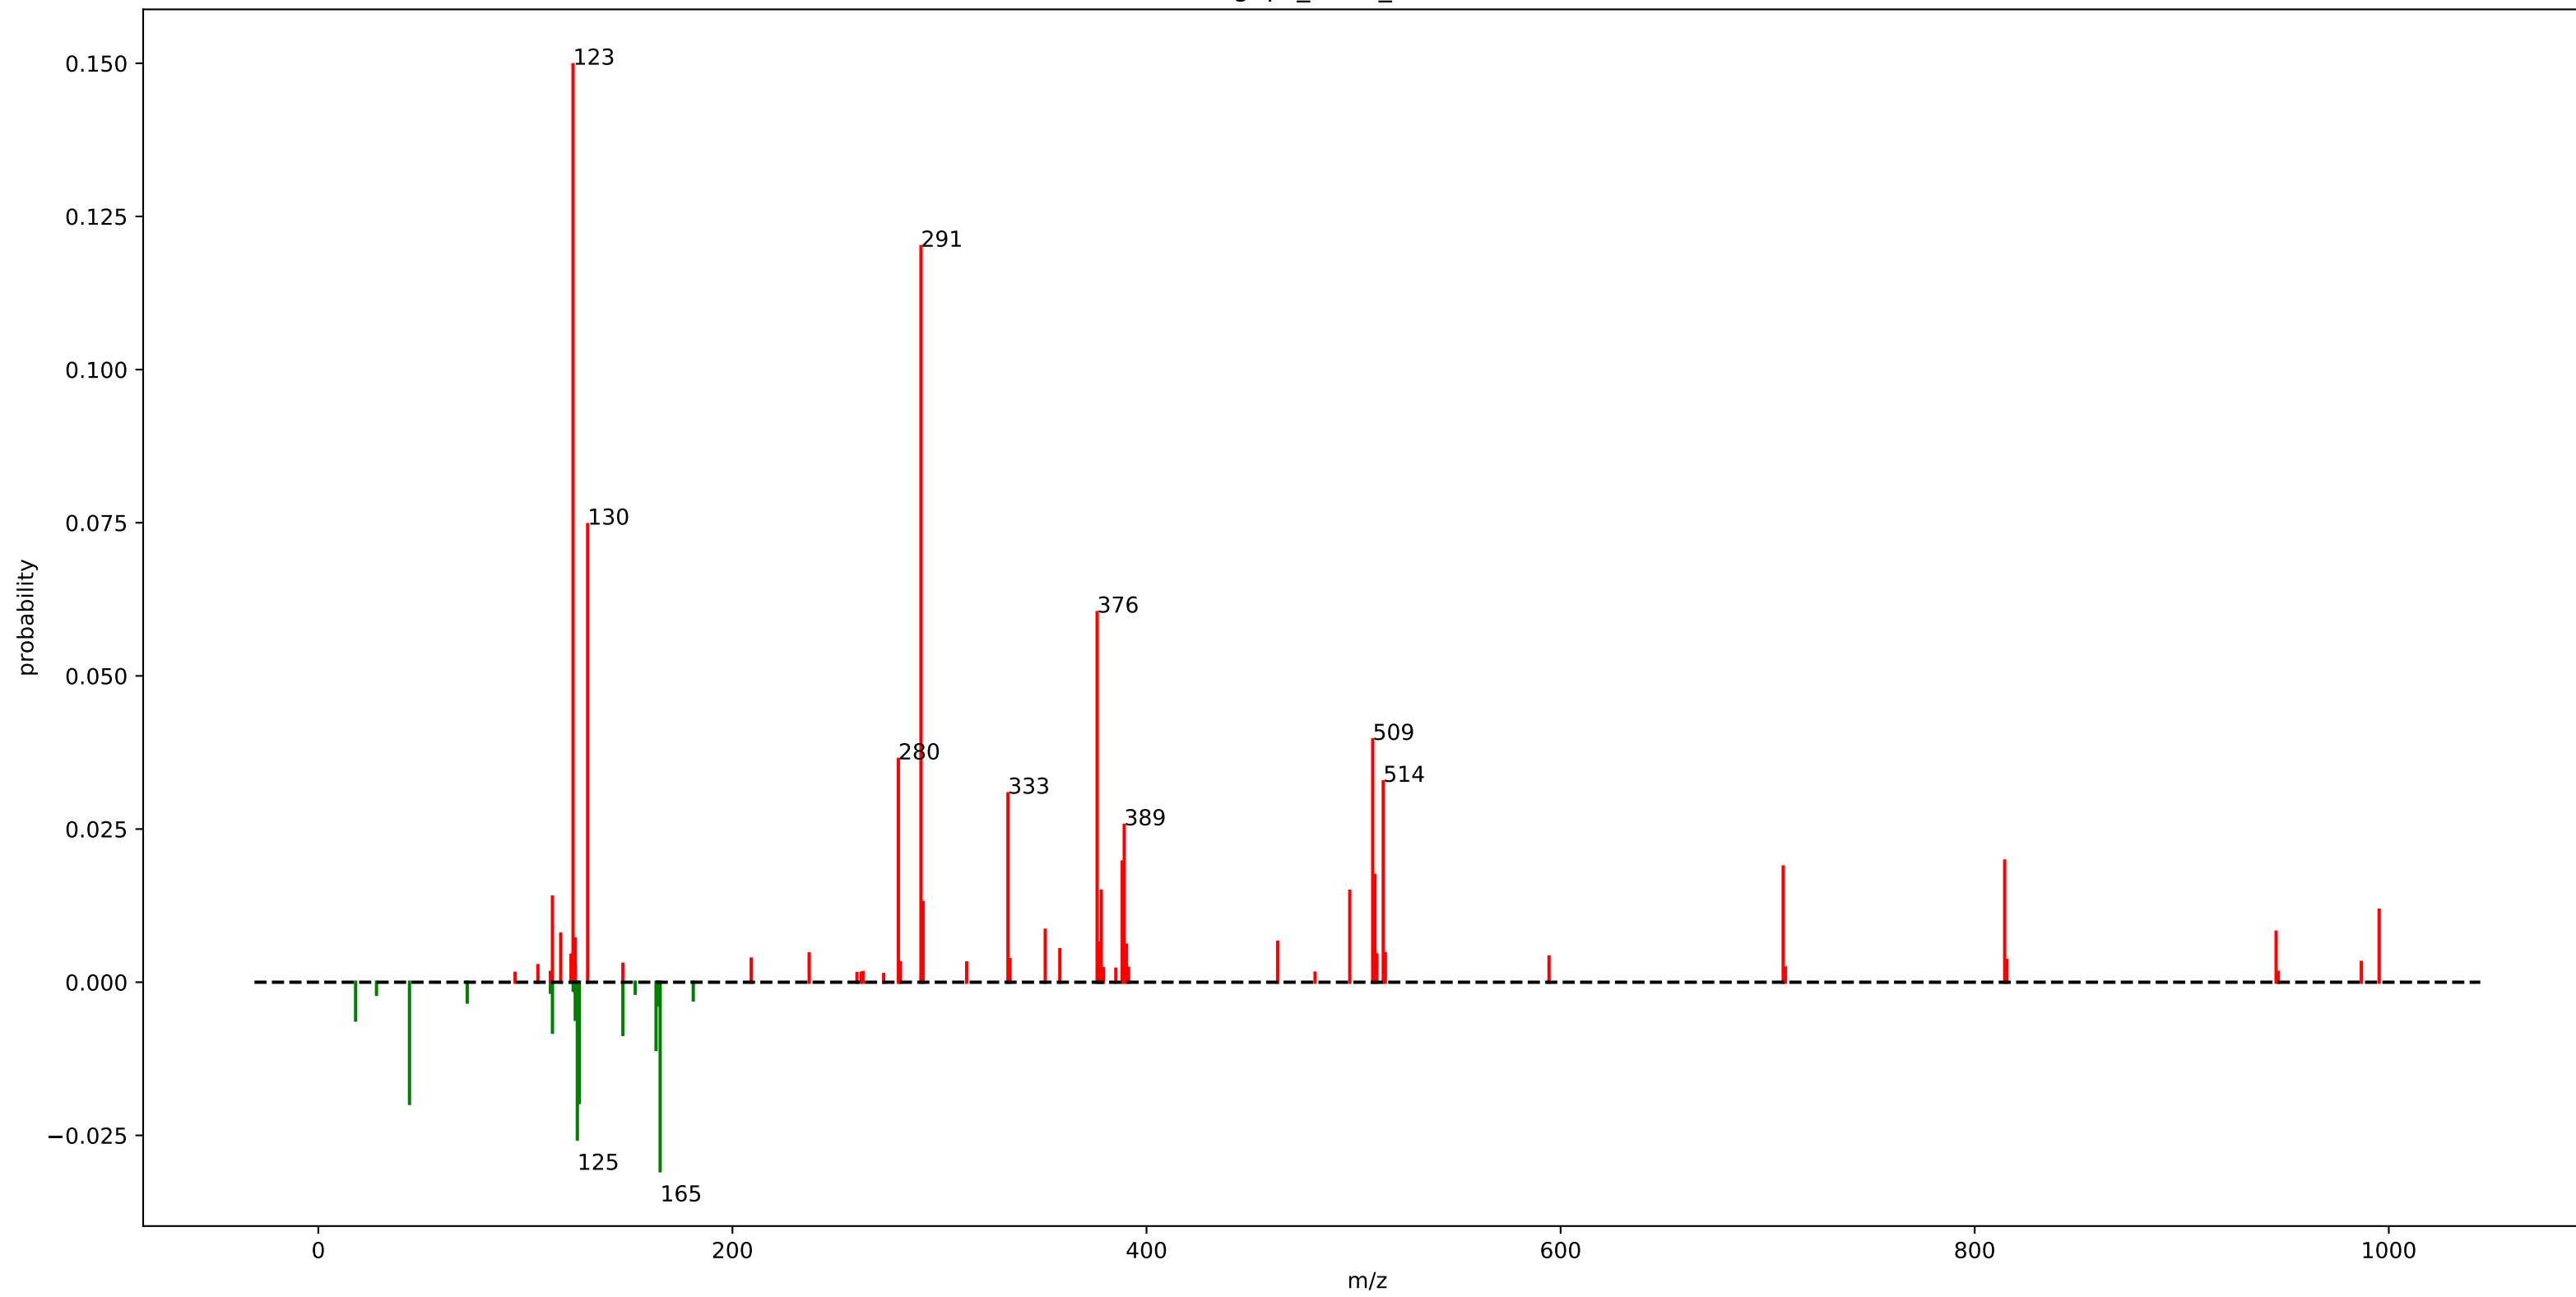

## gnps\_motif\_31.m2m

|                   |        |                   |        |
|-------------------|--------|-------------------|--------|
| fragment_123.0225 | : 0.15 | fragment_292.0725 | : 0.01 |
| fragment_291.0625 | : 0.12 | fragment_995.3475 | : 0.01 |
| fragment_130.0875 | : 0.07 | loss_163.1125     | : 0.01 |
| fragment_376.1475 | : 0.06 | loss_147.0875     | : 0.01 |
| fragment_509.2575 | : 0.04 | fragment_351.0875 | : 0.01 |
| fragment_280.1525 | : 0.04 | fragment_945.5825 | : 0.01 |
| fragment_514.3375 | : 0.03 | loss_113.0875     | : 0.01 |
| fragment_333.0775 | : 0.03 | fragment_117.0675 | : 0.01 |
| loss_165.1025     | : 0.03 | fragment_124.0275 | : 0.01 |
| loss_125.0975     | : 0.03 | fragment_463.3325 | : 0.01 |
| fragment_389.2375 | : 0.03 | fragment_377.1525 | : 0.01 |
| fragment_814.5025 | : 0.02 | loss_18.0075      | : 0.01 |
| loss_44.0275      | : 0.02 | loss_124.0875     | : 0.01 |
| loss_126.0775     | : 0.02 | fragment_390.2425 | : 0.01 |
| fragment_388.2575 | : 0.02 | fragment_358.1375 | : 0.01 |
| fragment_707.5025 | : 0.02 |                   |        |
| fragment_510.2575 | : 0.02 |                   |        |
| fragment_378.1425 | : 0.01 |                   |        |
| fragment_498.1775 | : 0.01 |                   |        |
| fragment_113.0575 | : 0.01 |                   |        |

StrepSalini\_motif\_6.m2m

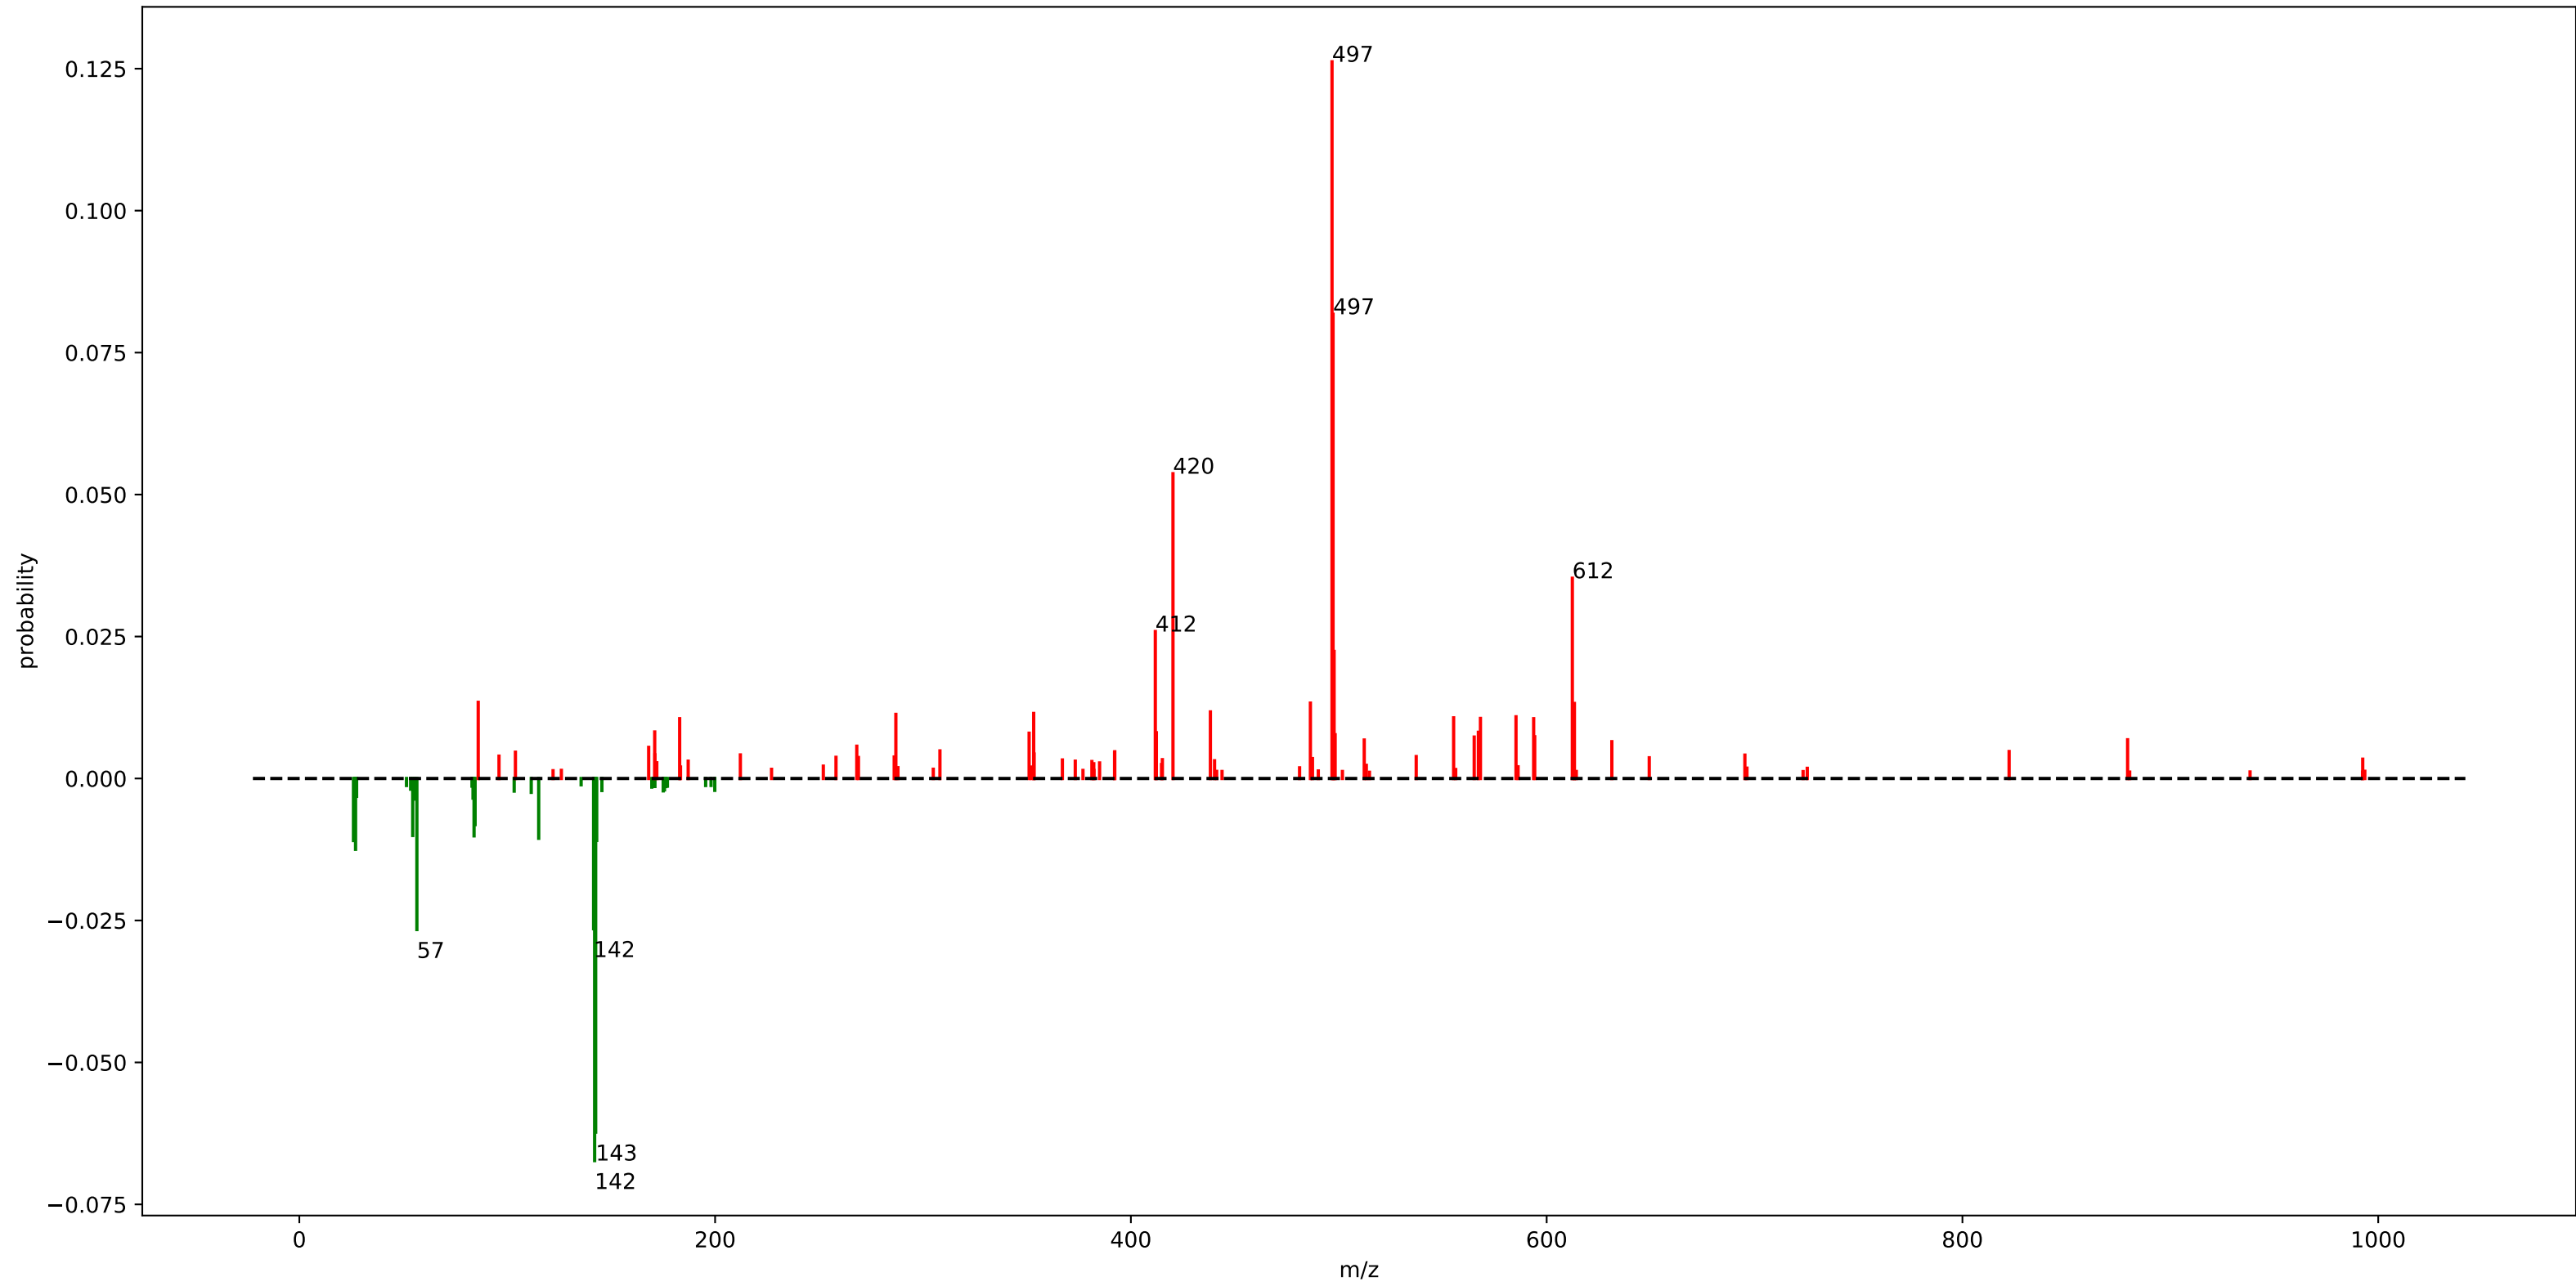

## StrepSalini\_motif\_6.m2m

|                   |        |                   |        |
|-------------------|--------|-------------------|--------|
| fragment_496.7500 | : 0.13 | fragment_555.2500 | : 0.01 |
| fragment_497.2500 | : 0.08 | fragment_568.1500 | : 0.01 |
| loss_142.0500     | : 0.07 | fragment_182.9500 | : 0.01 |
| loss_142.5500     | : 0.06 | loss_115.1500     | : 0.01 |
| fragment_420.2500 | : 0.05 | fragment_593.7500 | : 0.01 |
| fragment_612.3500 | : 0.04 | loss_84.0500      | : 0.01 |
| loss_56.5500      | : 0.03 | loss_54.5500      | : 0.01 |
| loss_141.5500     | : 0.03 | fragment_170.9500 | : 0.01 |
| fragment_411.7500 | : 0.03 | fragment_567.1500 | : 0.01 |
| fragment_497.7500 | : 0.02 | loss_84.5500      | : 0.01 |
| fragment_86.0500  | : 0.01 | fragment_412.2500 | : 0.01 |
| fragment_486.3500 | : 0.01 | fragment_351.0500 | : 0.01 |
| fragment_613.3500 | : 0.01 | fragment_498.2500 | : 0.01 |
| loss_27.0500      | : 0.01 | fragment_594.2500 | : 0.01 |
| fragment_438.2500 | : 0.01 | fragment_565.1500 | : 0.01 |
| fragment_353.2500 | : 0.01 | fragment_879.4500 | : 0.01 |
| fragment_286.9500 | : 0.01 | fragment_512.2500 | : 0.01 |
| loss_26.0500      | : 0.01 | fragment_631.3500 | : 0.01 |
| loss_143.0500     | : 0.01 | fragment_268.1525 | : 0.01 |
| fragment_585.2500 | : 0.01 | fragment_168.0500 | : 0.01 |

rhamn\_motif\_179.m2m

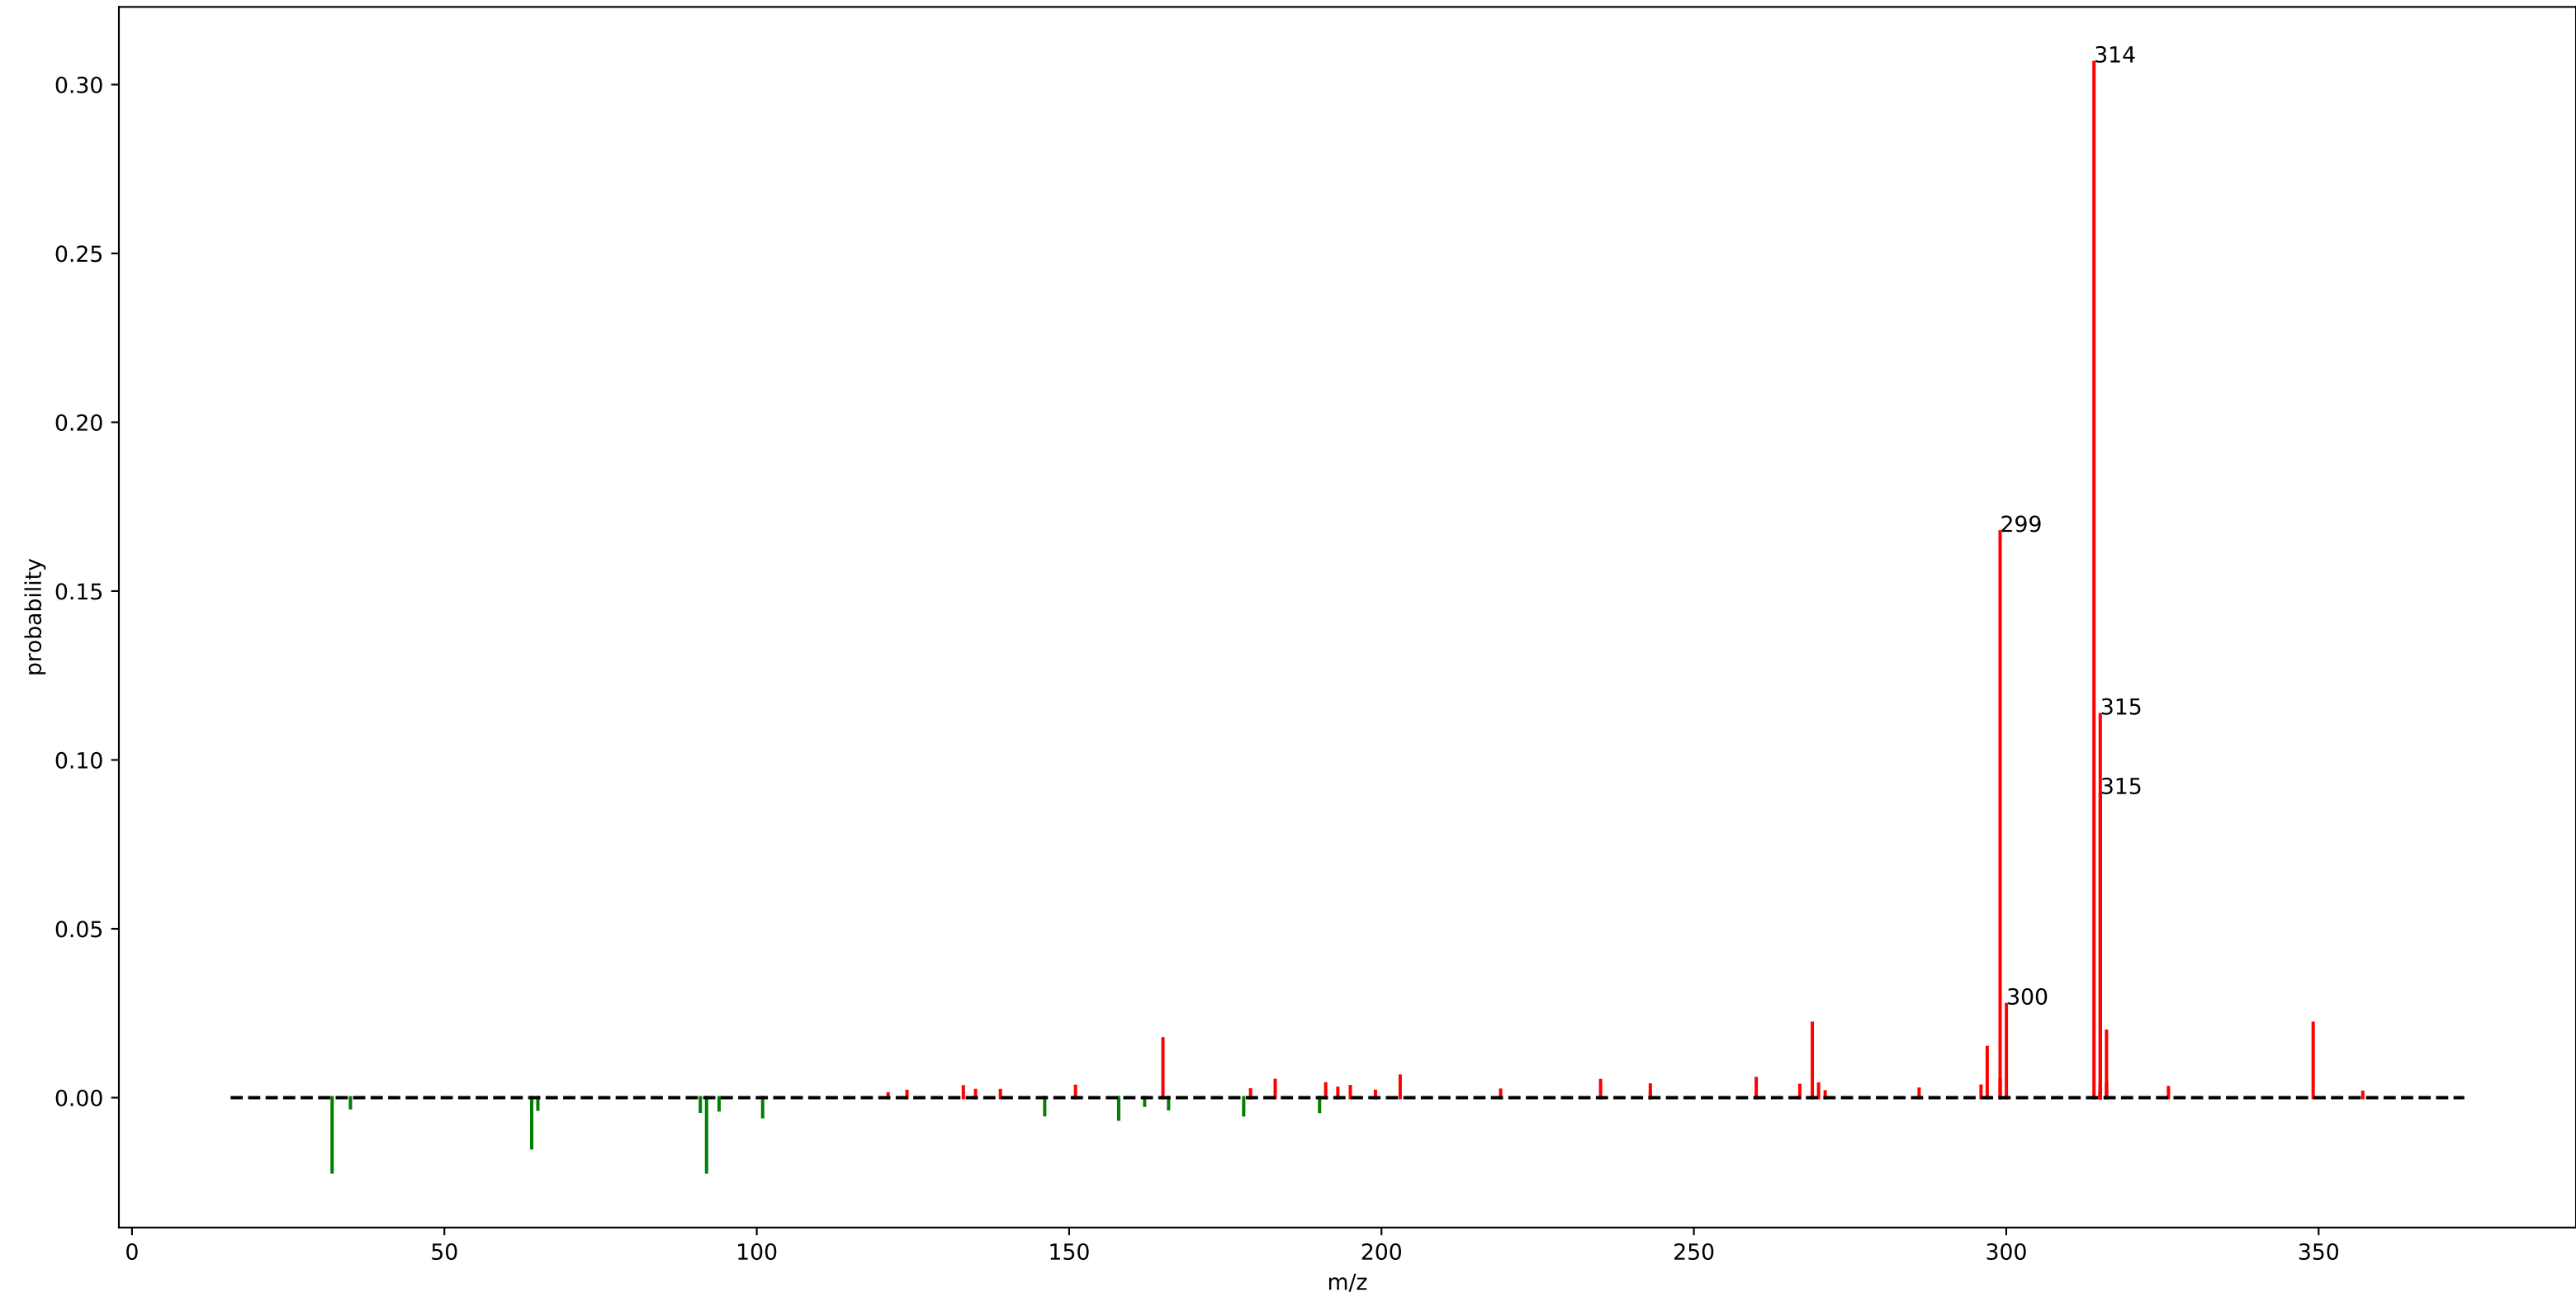

## rhamn\_motif\_179.m2m

|                   |        |                   |        |
|-------------------|--------|-------------------|--------|
| fragment_314.0425 | : 0.31 | fragment_235.0625 | : 0.01 |
| fragment_299.0175 | : 0.17 | loss_146.0925     | : 0.01 |
| fragment_315.0475 | : 0.11 |                   |        |
| fragment_315.0525 | : 0.09 |                   |        |
| fragment_300.0225 | : 0.03 |                   |        |
| loss_91.9625      | : 0.02 |                   |        |
| fragment_268.9625 | : 0.02 |                   |        |
| fragment_349.1275 | : 0.02 |                   |        |
| loss_32.0275      | : 0.02 |                   |        |
| fragment_316.0525 | : 0.02 |                   |        |
| fragment_165.0175 | : 0.02 |                   |        |
| loss_63.9725      | : 0.01 |                   |        |
| fragment_296.9525 | : 0.01 |                   |        |
| loss_157.9325     | : 0.01 |                   |        |
| fragment_202.9925 | : 0.01 |                   |        |
| fragment_259.9825 | : 0.01 |                   |        |
| loss_100.9425     | : 0.01 |                   |        |
| fragment_299.0275 | : 0.01 |                   |        |
| fragment_182.9825 | : 0.01 |                   |        |
| loss_177.9425     | : 0.01 |                   |        |



motif\_683

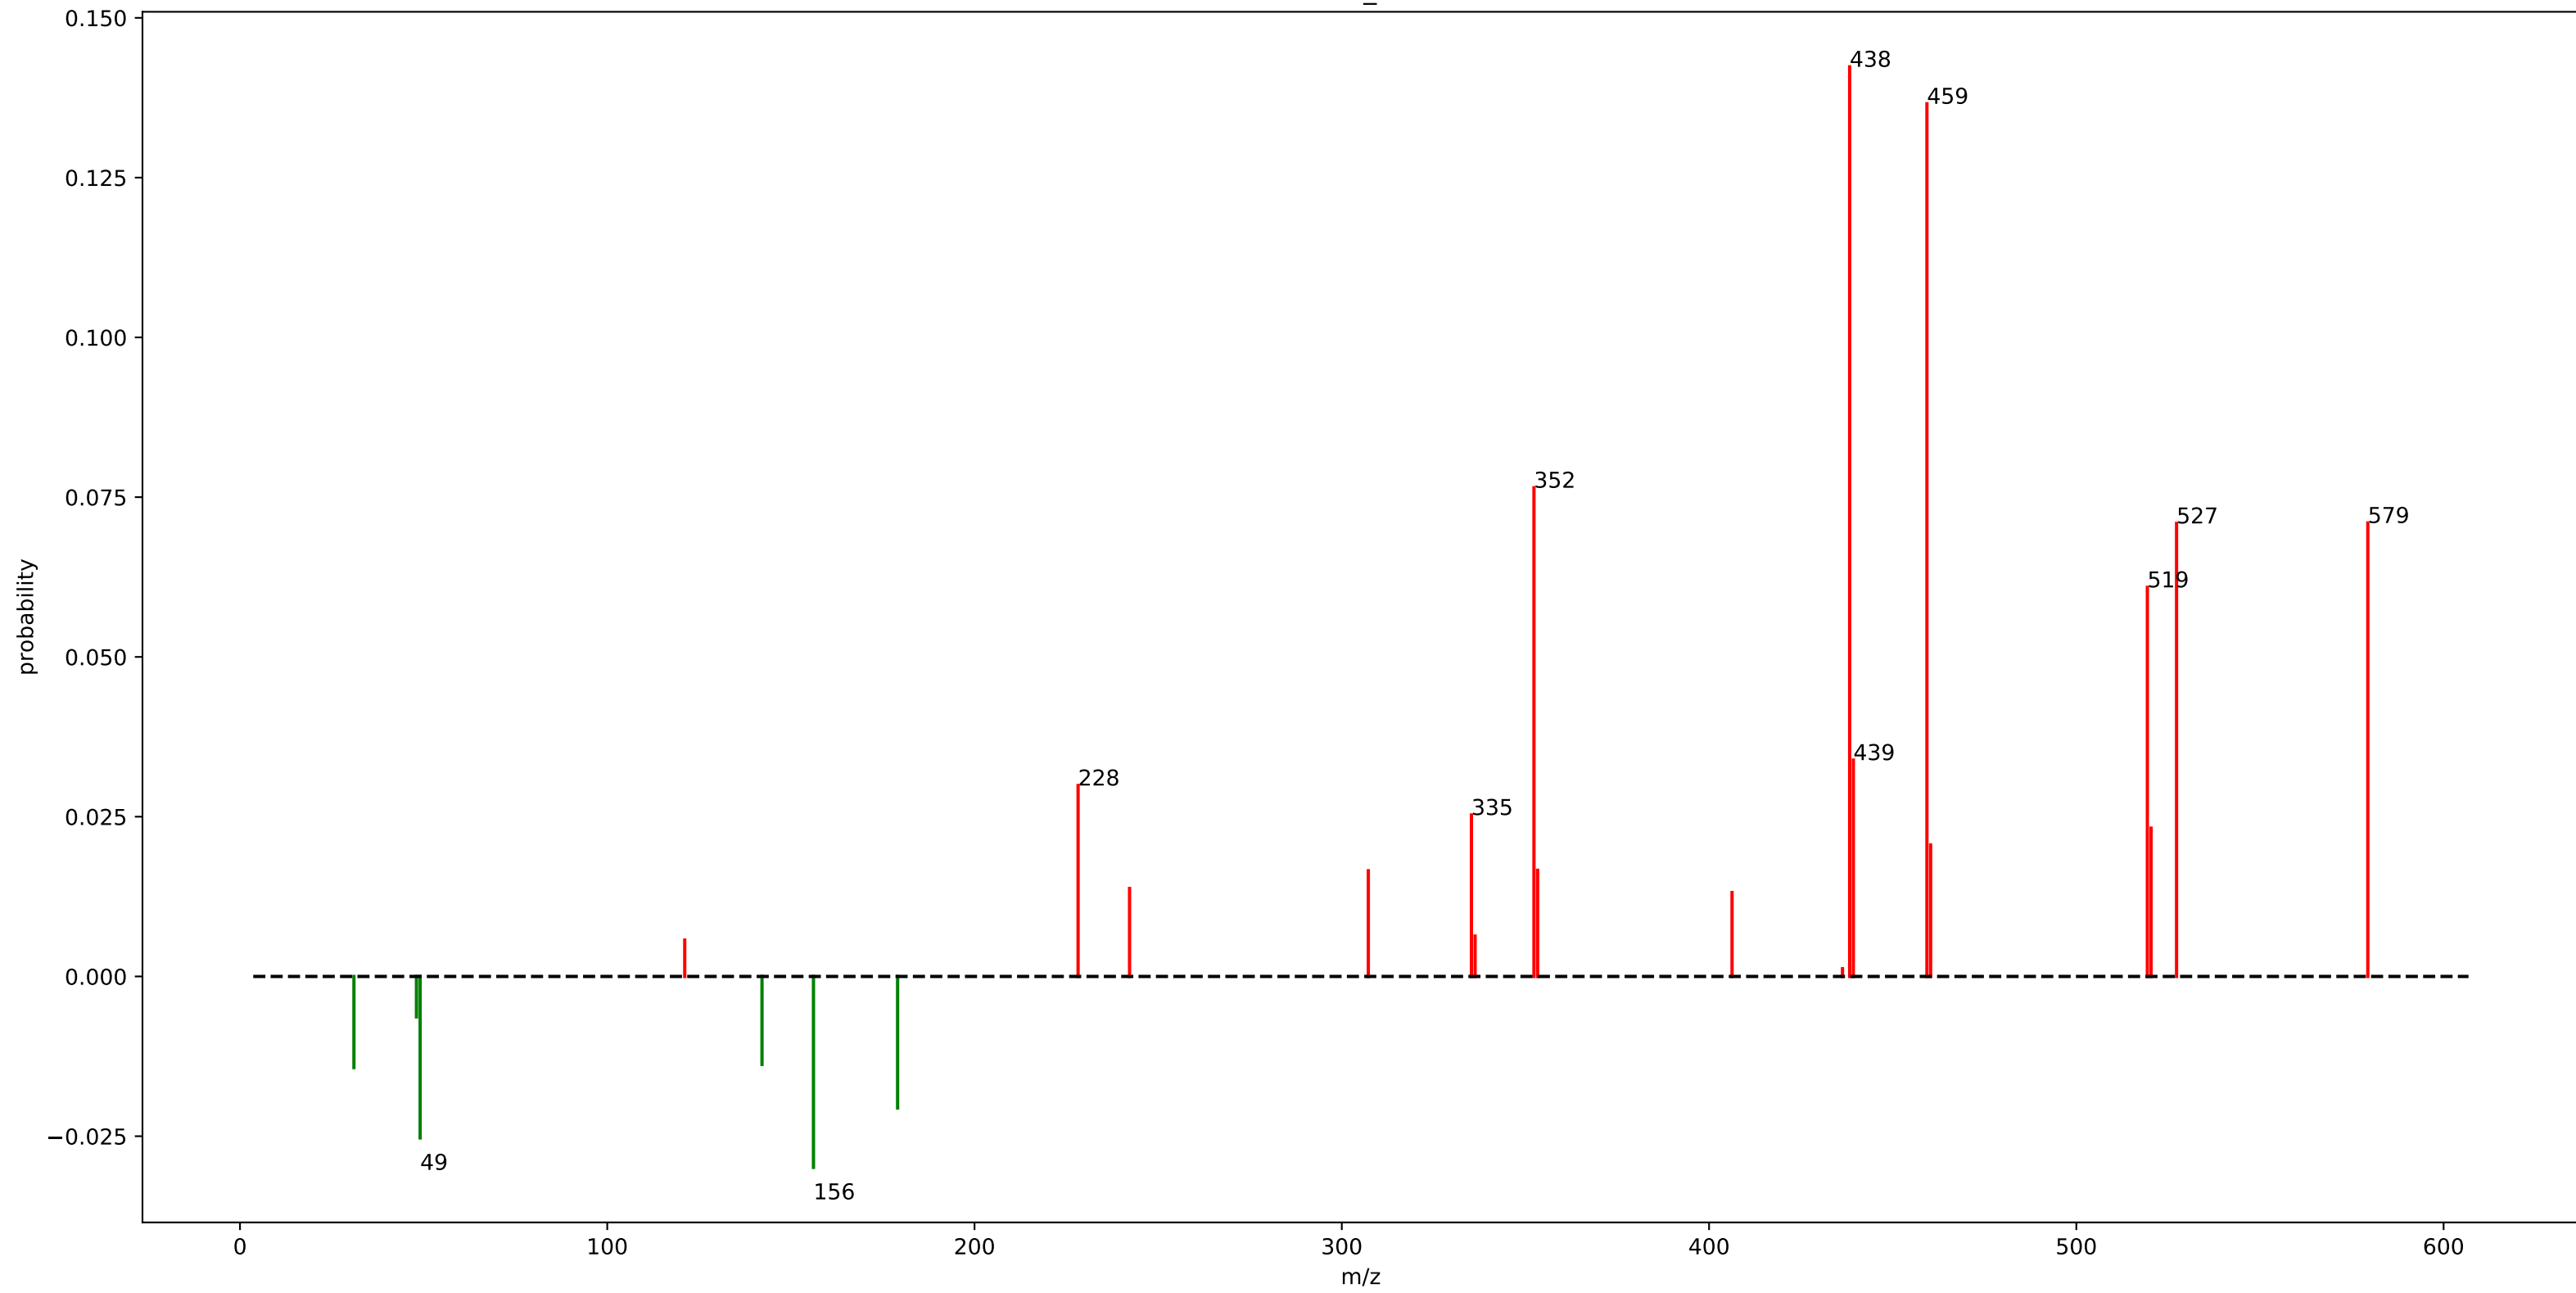

# motif\_683

|                   |        |                   |        |
|-------------------|--------|-------------------|--------|
| fragment_438.2825 | : 0.14 | fragment_336.2975 | : 0.01 |
| fragment_459.3225 | : 0.14 | loss_48.0475      | : 0.01 |
| fragment_352.3225 | : 0.08 | fragment_121.0975 | : 0.01 |
| fragment_579.3675 | : 0.07 |                   |        |
| fragment_527.2925 | : 0.07 |                   |        |
| fragment_519.3425 | : 0.06 |                   |        |
| fragment_439.2875 | : 0.03 |                   |        |
| fragment_228.1975 | : 0.03 |                   |        |
| loss_156.1475     | : 0.03 |                   |        |
| loss_49.0525      | : 0.03 |                   |        |
| fragment_335.2925 | : 0.03 |                   |        |
| fragment_520.3475 | : 0.02 |                   |        |
| fragment_460.3275 | : 0.02 |                   |        |
| loss_179.0575     | : 0.02 |                   |        |
| fragment_353.3225 | : 0.02 |                   |        |
| fragment_307.2225 | : 0.02 |                   |        |
| loss_31.0225      | : 0.01 |                   |        |
| loss_142.1325     | : 0.01 |                   |        |
| fragment_242.2125 | : 0.01 |                   |        |
| fragment_406.2575 | : 0.01 |                   |        |

rhamn\_motif\_86.m2m

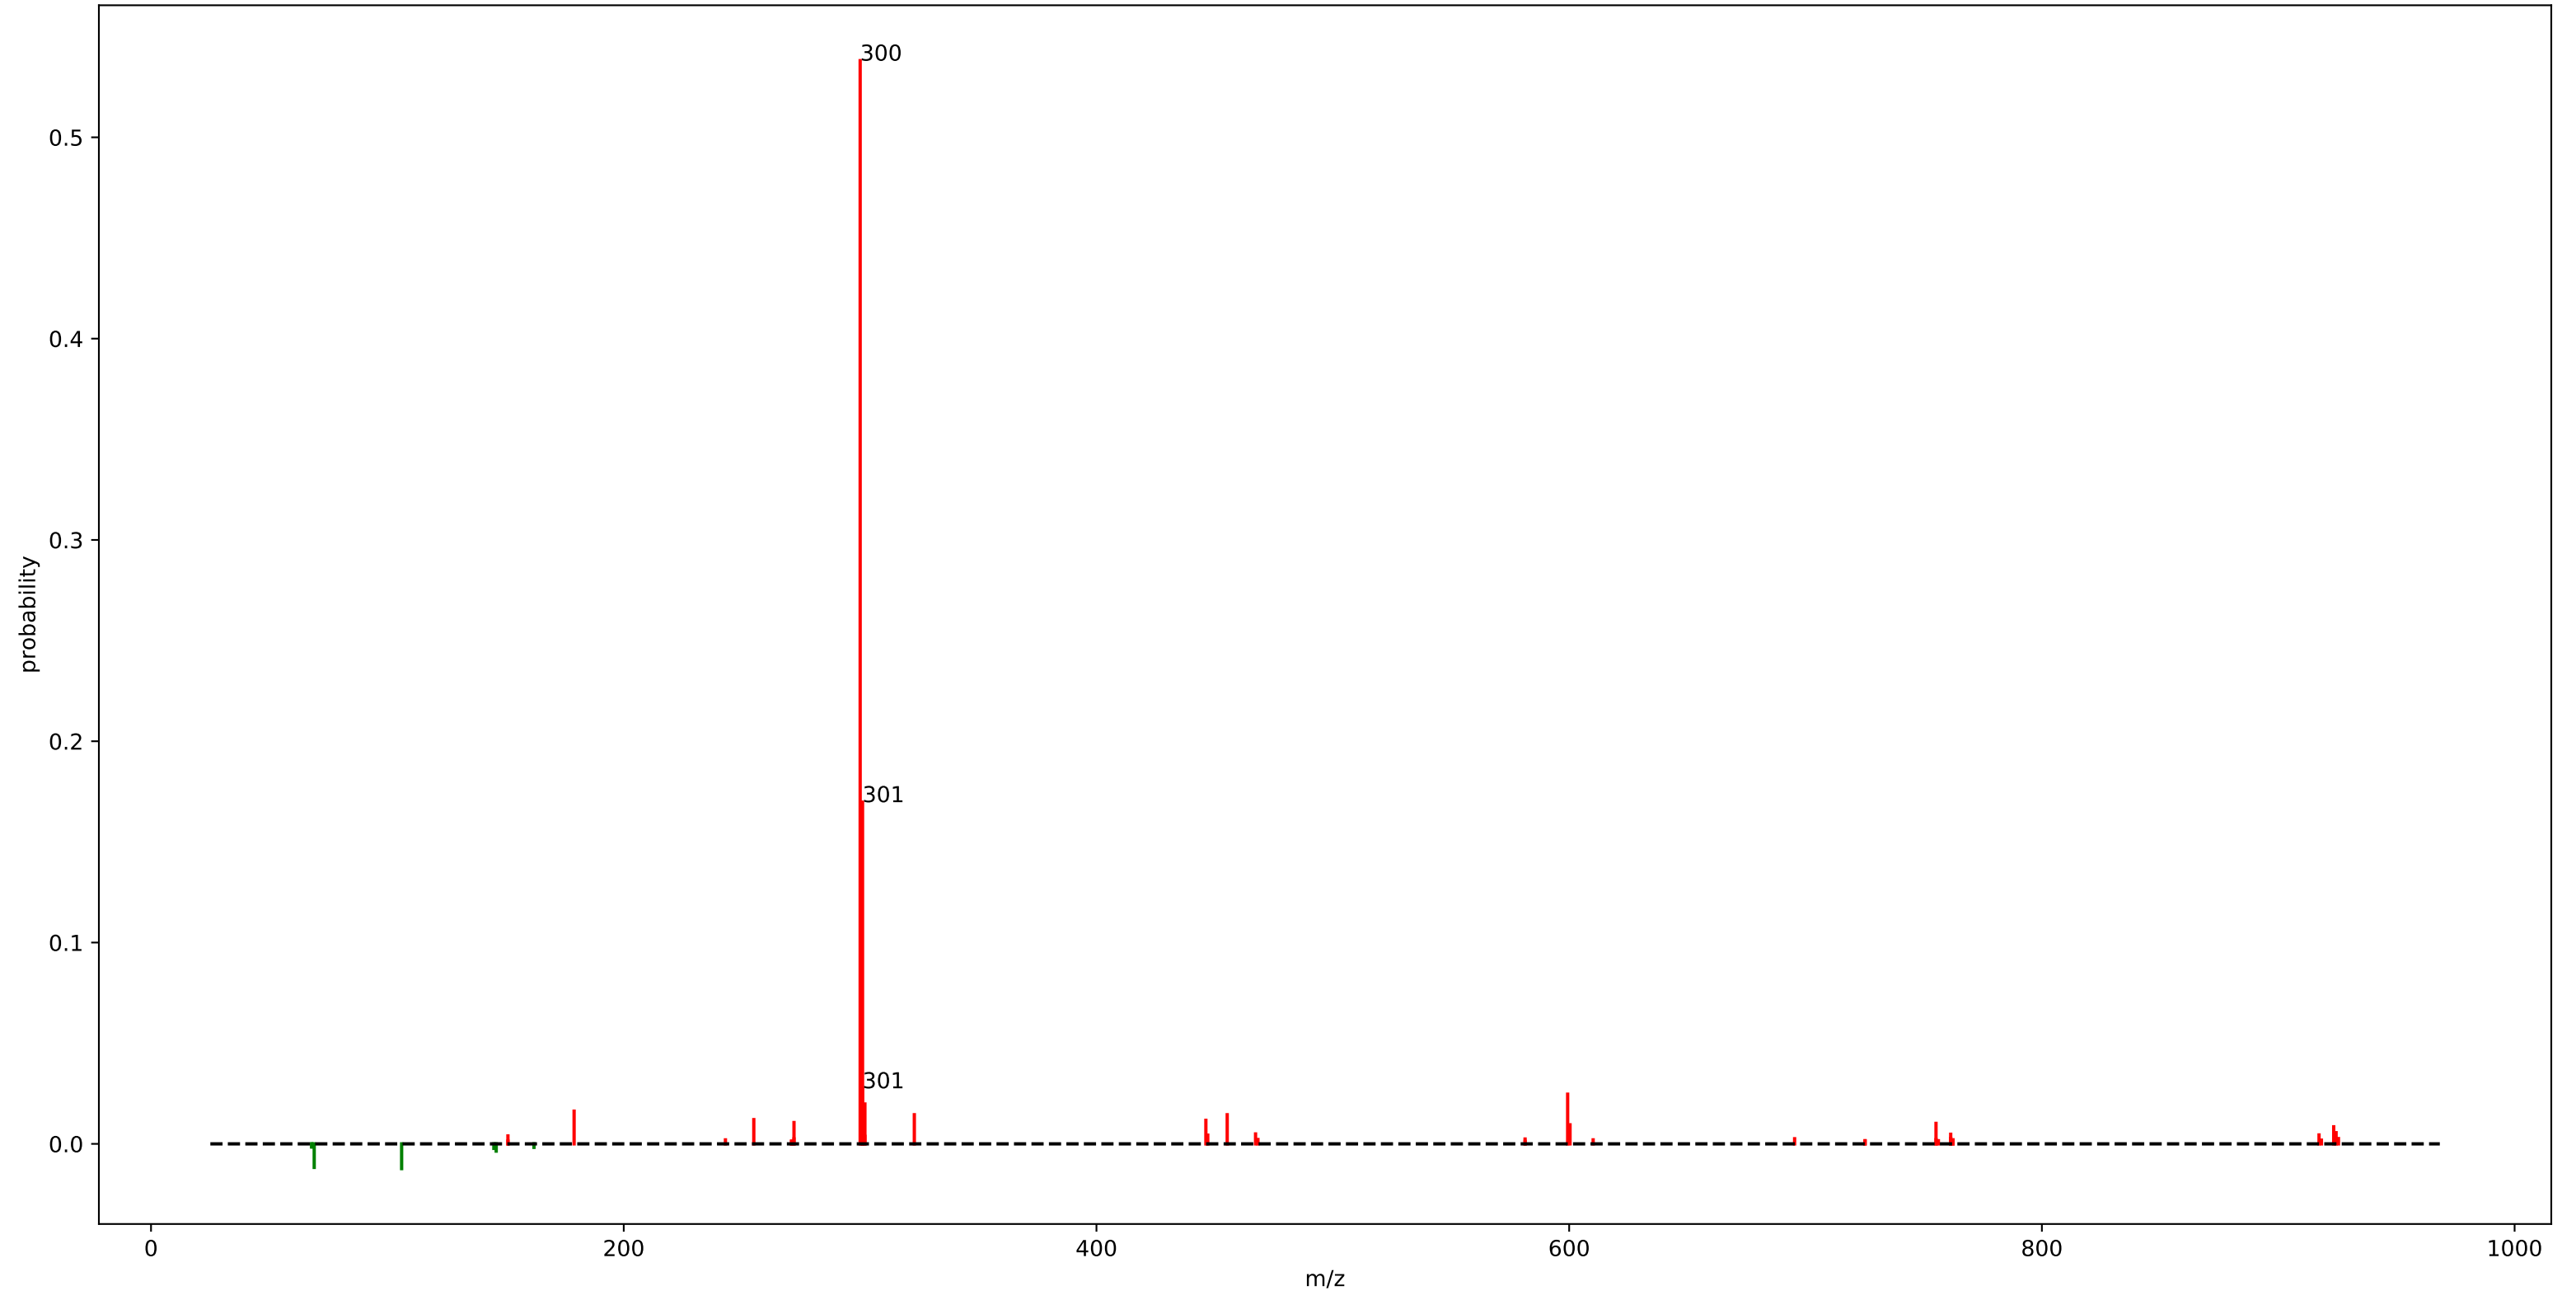

## rhamn\_motif\_86.m2m

|                   |        |
|-------------------|--------|
| fragment_300.0275 | : 0.54 |
| fragment_301.0325 | : 0.17 |
| fragment_301.0375 | : 0.03 |
| fragment_599.3575 | : 0.02 |
| fragment_302.0375 | : 0.02 |
| fragment_178.9975 | : 0.02 |
| fragment_322.9425 | : 0.01 |
| fragment_455.3225 | : 0.01 |
| loss_106.0275     | : 0.01 |
| fragment_255.0275 | : 0.01 |
| fragment_446.2925 | : 0.01 |
| loss_69.0425      | : 0.01 |
| fragment_272.0325 | : 0.01 |
| fragment_755.2025 | : 0.01 |
| fragment_600.3625 | : 0.01 |
| fragment_923.4675 | : 0.01 |
| fragment_301.0275 | : 0.01 |
| fragment_924.4725 | : 0.01 |

euphorbia\_motif\_199.m2m

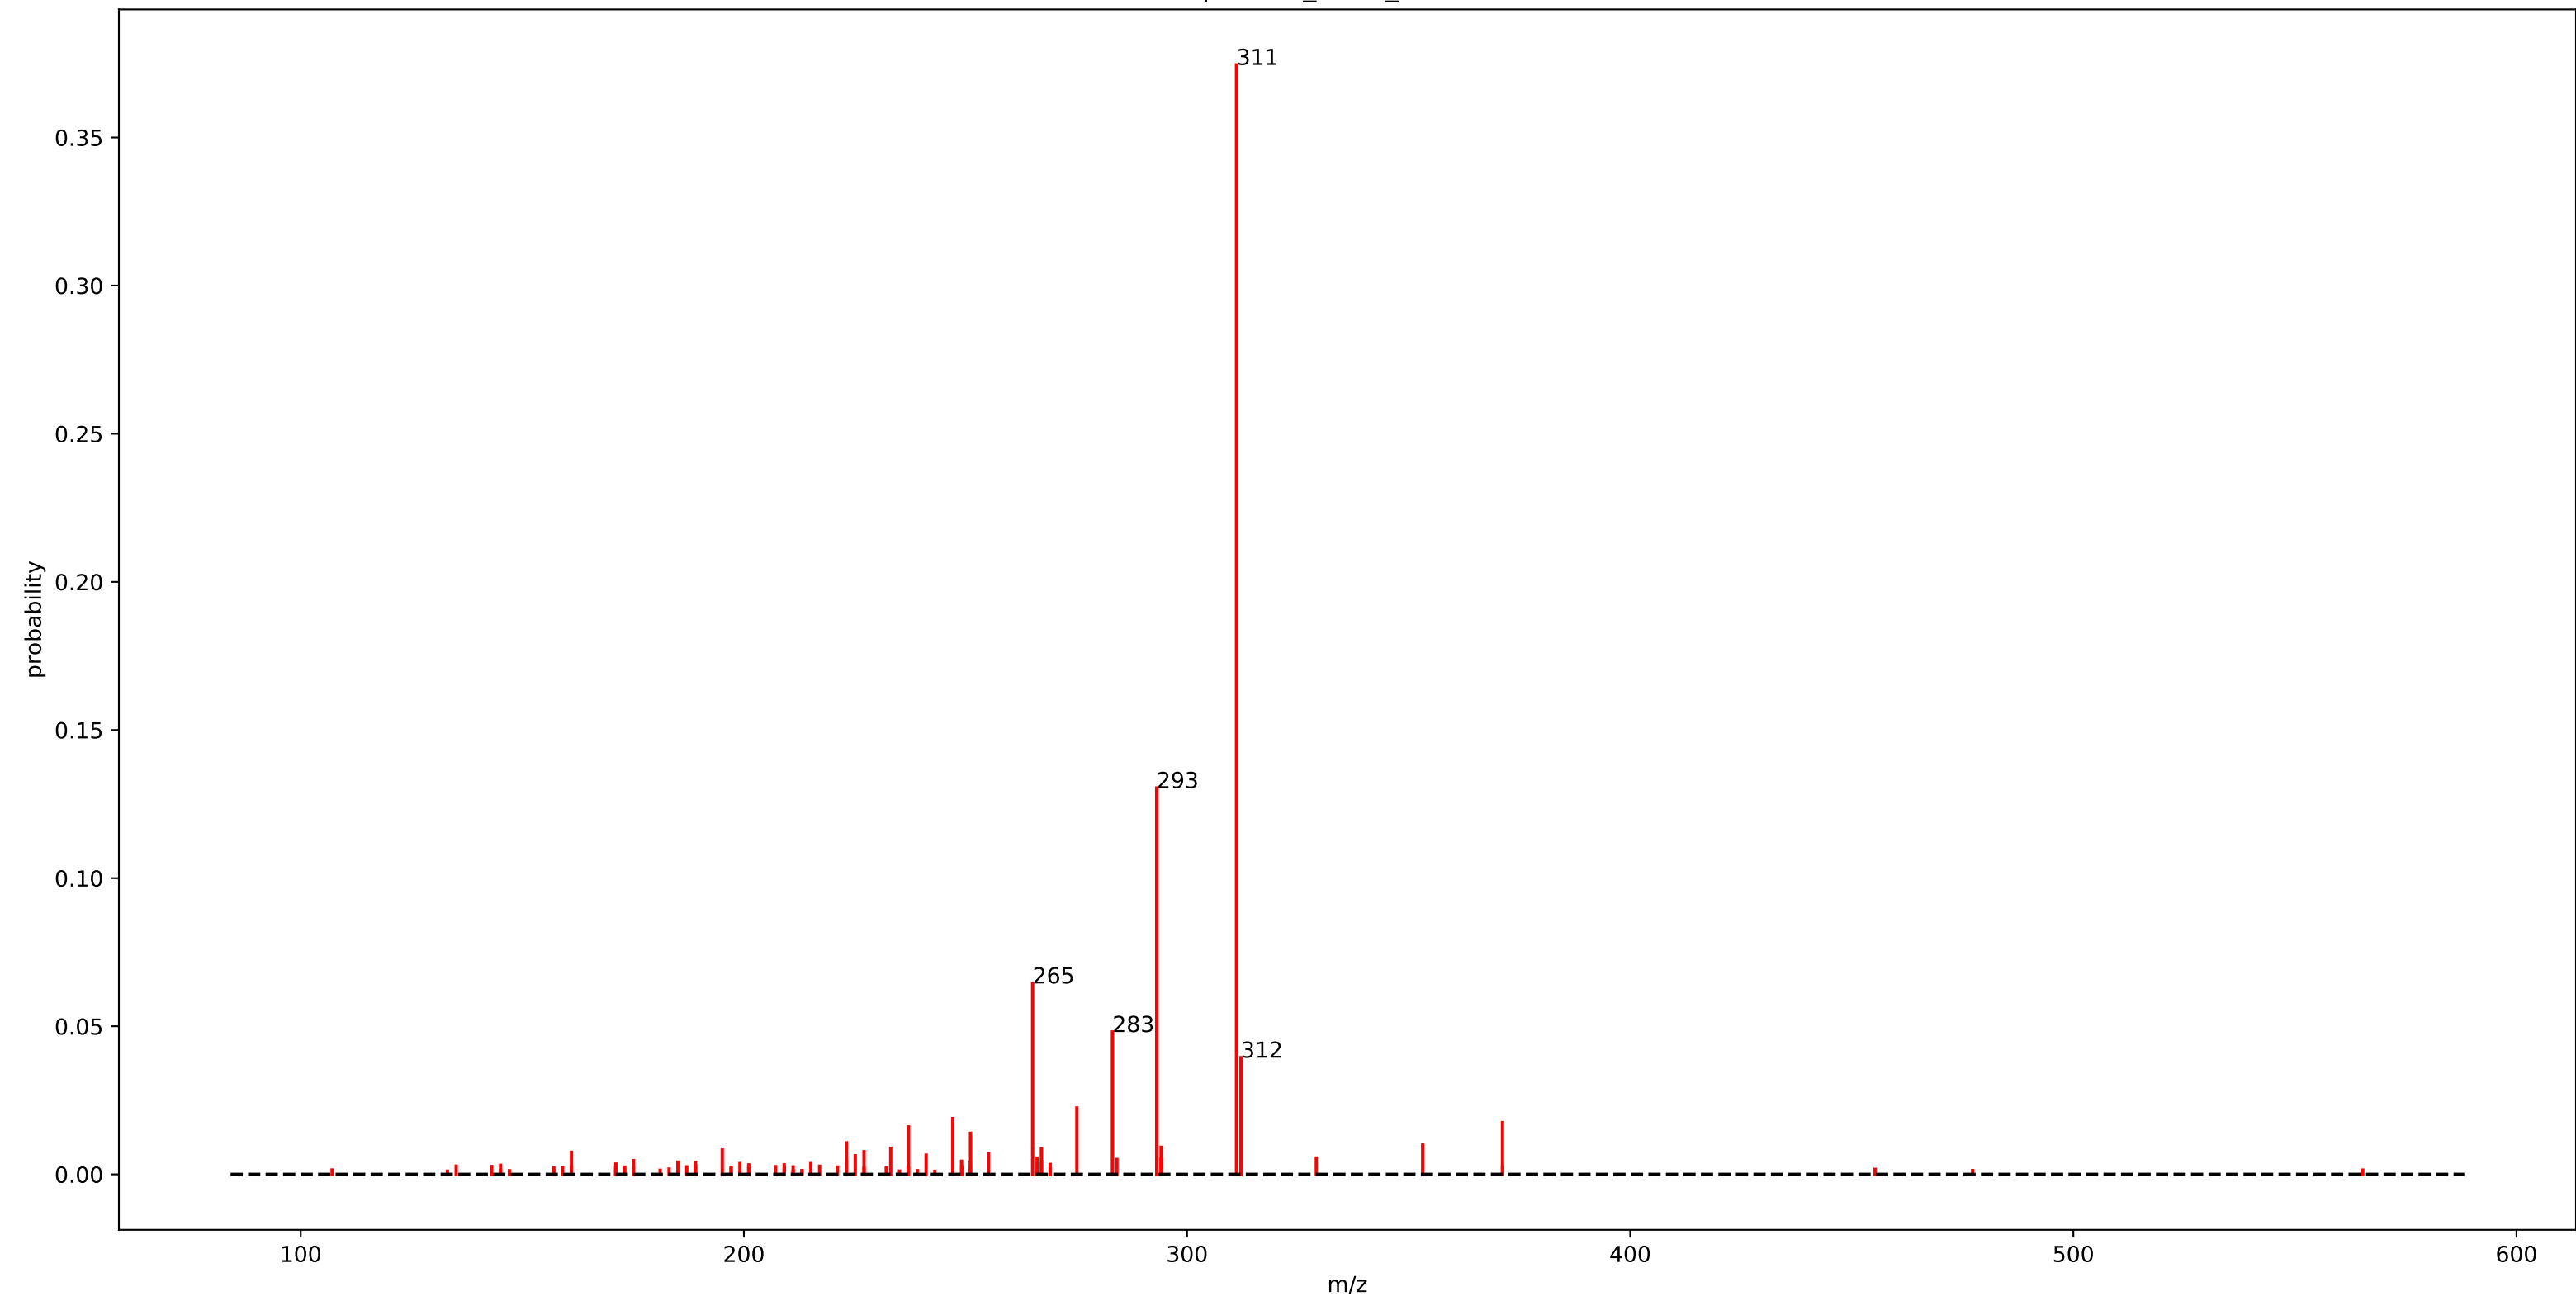

## euphorbia\_motif\_199.m2m

|                   |        |                   |        |
|-------------------|--------|-------------------|--------|
| fragment_311.1625 | : 0.37 | fragment_225.1275 | : 0.01 |
| fragment_293.1525 | : 0.13 | fragment_329.1725 | : 0.01 |
| fragment_265.1575 | : 0.06 | fragment_266.1625 | : 0.01 |
| fragment_283.1675 | : 0.05 | fragment_294.1525 | : 0.01 |
| fragment_312.1675 | : 0.04 | fragment_284.1725 | : 0.01 |
| fragment_275.1425 | : 0.02 |                   |        |
| fragment_247.1475 | : 0.02 |                   |        |
| fragment_371.1825 | : 0.02 |                   |        |
| fragment_237.1625 | : 0.02 |                   |        |
| fragment_251.1425 | : 0.01 |                   |        |
| fragment_223.1125 | : 0.01 |                   |        |
| fragment_353.1725 | : 0.01 |                   |        |
| fragment_294.1575 | : 0.01 |                   |        |
| fragment_233.1325 | : 0.01 |                   |        |
| fragment_267.1375 | : 0.01 |                   |        |
| fragment_195.1175 | : 0.01 |                   |        |
| fragment_227.1075 | : 0.01 |                   |        |
| fragment_161.0975 | : 0.01 |                   |        |
| fragment_255.1725 | : 0.01 |                   |        |
| fragment_241.1225 | : 0.01 |                   |        |

motif\_680

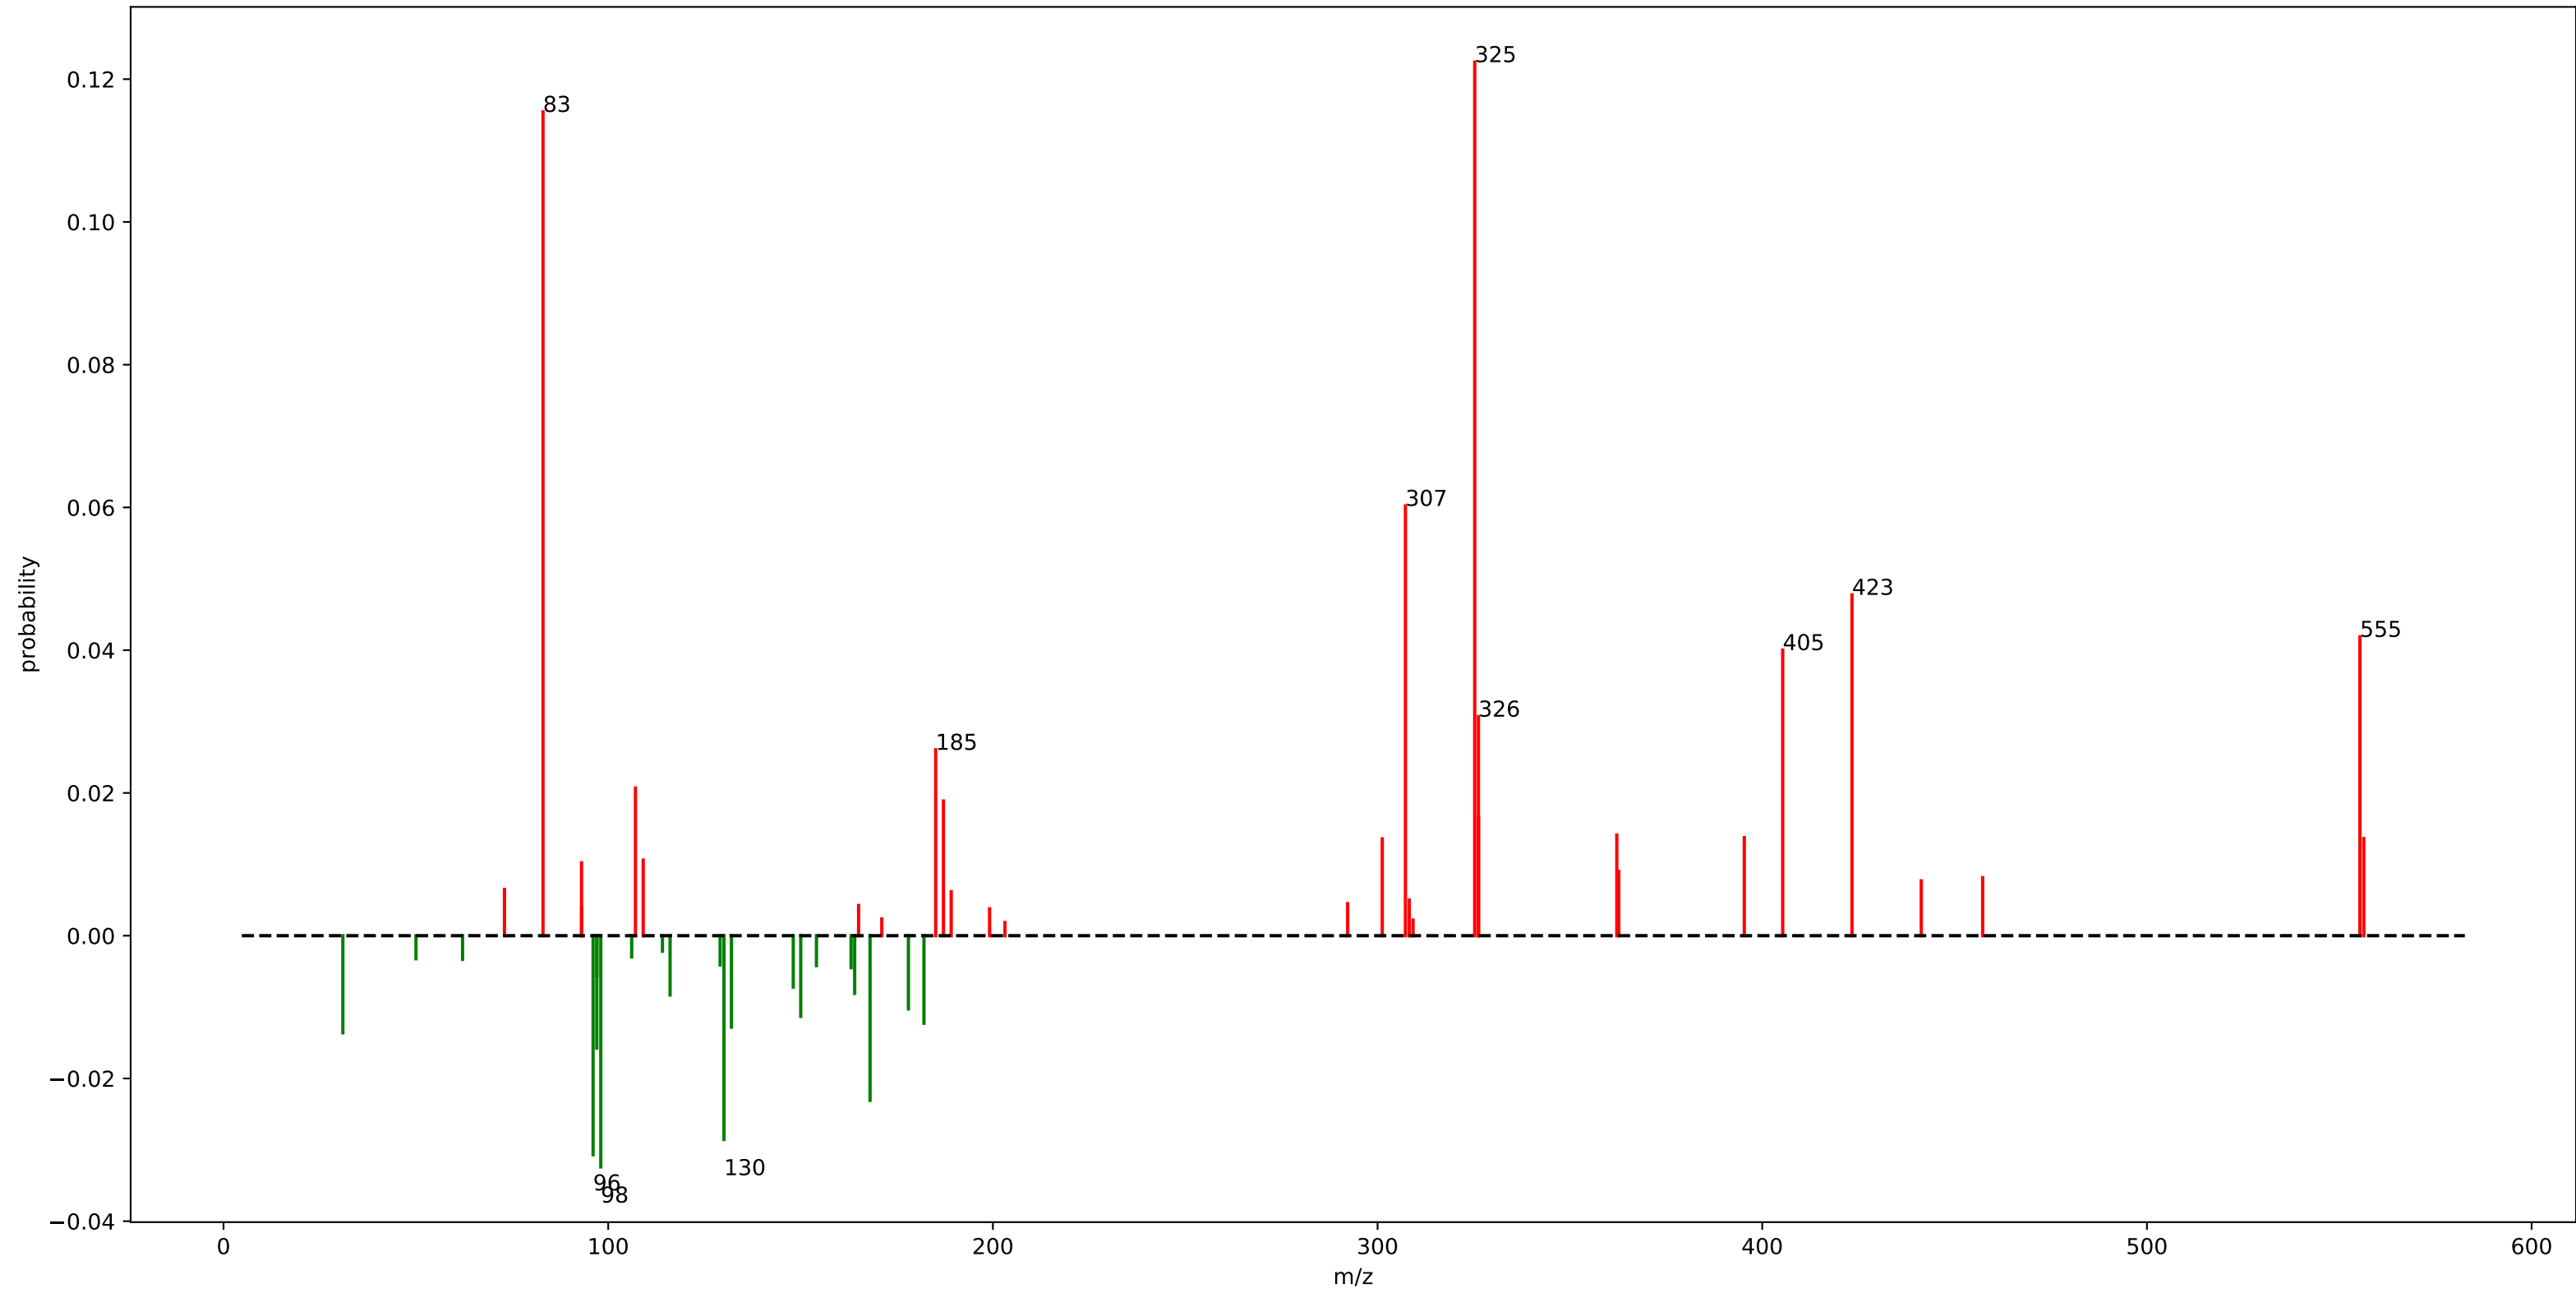

## motif\_680

|                   |        |                   |        |
|-------------------|--------|-------------------|--------|
| fragment_325.2525 | : 0.12 | fragment_301.2175 | : 0.01 |
| fragment_83.0475  | : 0.12 | loss_132.0375     | : 0.01 |
| fragment_307.2425 | : 0.06 | loss_182.0775     | : 0.01 |
| fragment_423.3275 | : 0.05 | loss_150.0475     | : 0.01 |
| fragment_555.3675 | : 0.04 | fragment_109.0975 | : 0.01 |
| fragment_405.3175 | : 0.04 | loss_178.0425     | : 0.01 |
| loss_98.0725      | : 0.03 | fragment_93.0675  | : 0.01 |
| loss_96.0675      | : 0.03 | fragment_362.6975 | : 0.01 |
| fragment_326.2175 | : 0.03 | loss_116.0825     | : 0.01 |
| loss_130.0975     | : 0.03 | fragment_457.2975 | : 0.01 |
| fragment_185.1325 | : 0.03 | loss_164.0675     | : 0.01 |
| loss_168.0625     | : 0.02 | fragment_441.3375 | : 0.01 |
| fragment_107.0825 | : 0.02 | loss_148.1075     | : 0.01 |
| fragment_187.1475 | : 0.02 | fragment_73.0275  | : 0.01 |
| fragment_326.2575 | : 0.02 | fragment_189.1625 | : 0.01 |
| loss_97.0325      | : 0.02 | loss_97.0675      | : 0.01 |
| fragment_362.1925 | : 0.01 |                   |        |
| fragment_395.3325 | : 0.01 |                   |        |
| fragment_556.3725 | : 0.01 |                   |        |
| loss_31.0175      | : 0.01 |                   |        |



motif\_687

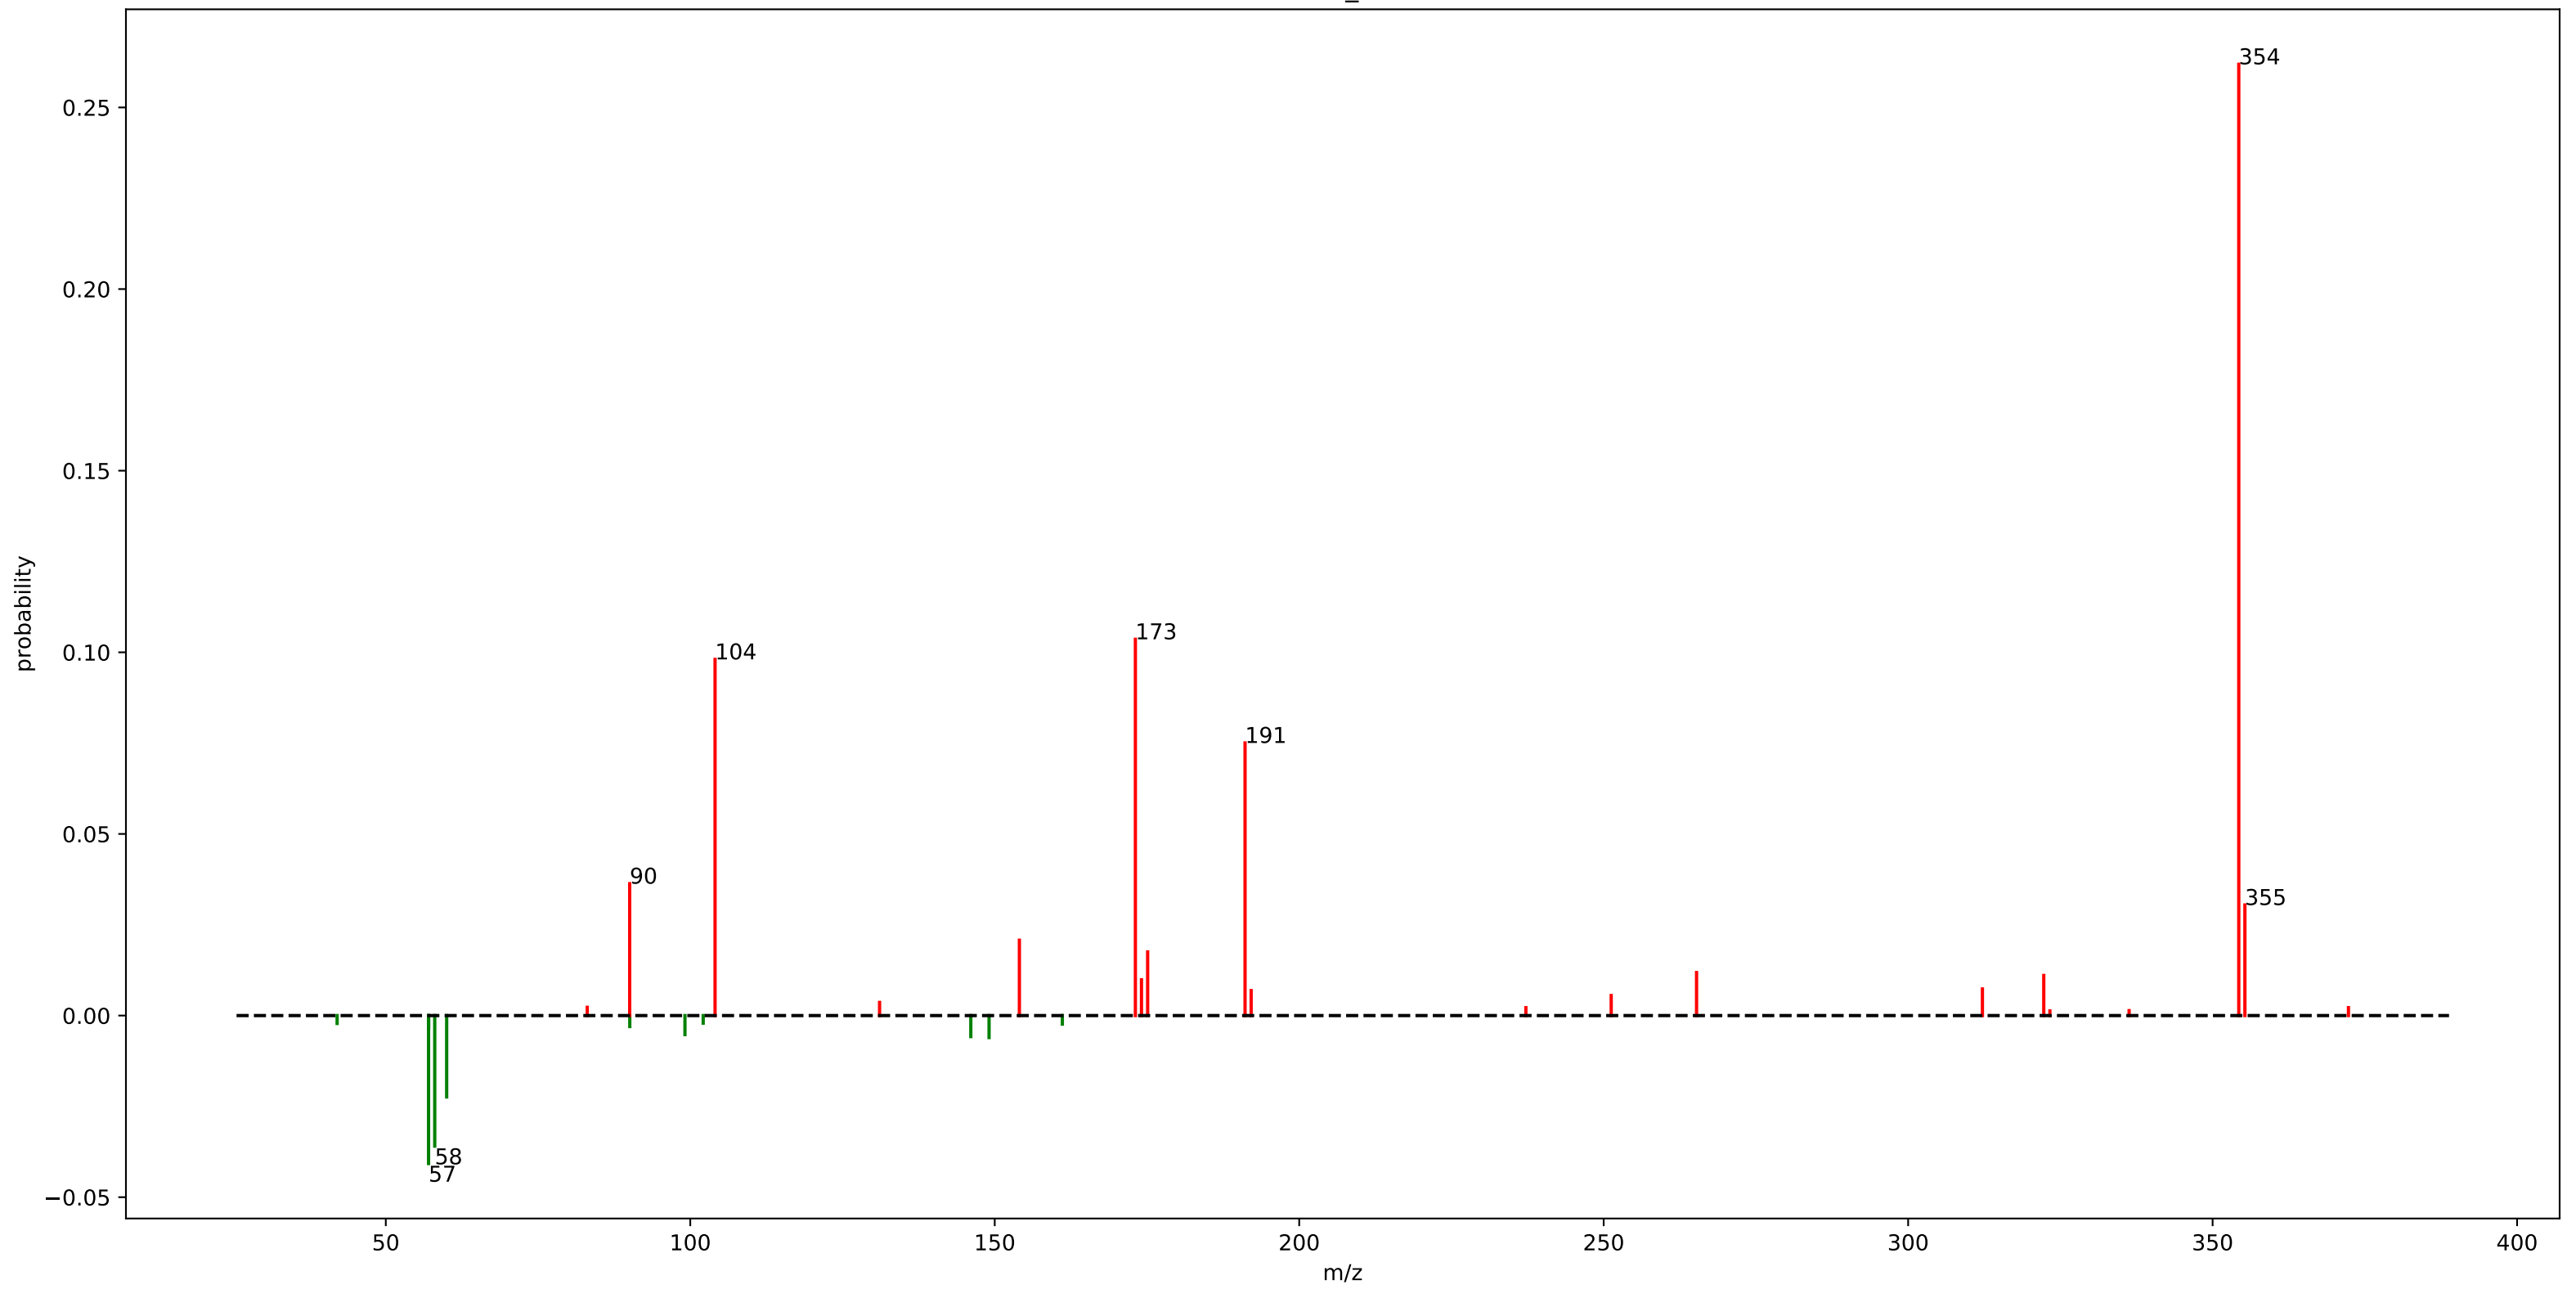

## motif\_687

|                   |        |
|-------------------|--------|
| fragment_354.2975 | : 0.26 |
| fragment_173.0975 | : 0.10 |
| fragment_104.0725 | : 0.10 |
| fragment_191.1075 | : 0.08 |
| loss_57.0225      | : 0.04 |
| fragment_90.0525  | : 0.04 |
| loss_58.0375      | : 0.04 |
| fragment_355.3025 | : 0.03 |
| loss_59.9975      | : 0.02 |
| fragment_154.0475 | : 0.02 |
| fragment_175.1125 | : 0.02 |
| fragment_265.2525 | : 0.01 |
| fragment_322.2725 | : 0.01 |
| fragment_174.0975 | : 0.01 |
| fragment_312.1975 | : 0.01 |
| fragment_192.1075 | : 0.01 |
| loss_149.0675     | : 0.01 |
| loss_146.0725     | : 0.01 |
| fragment_251.2375 | : 0.01 |
| loss_99.1275      | : 0.01 |

motif\_686

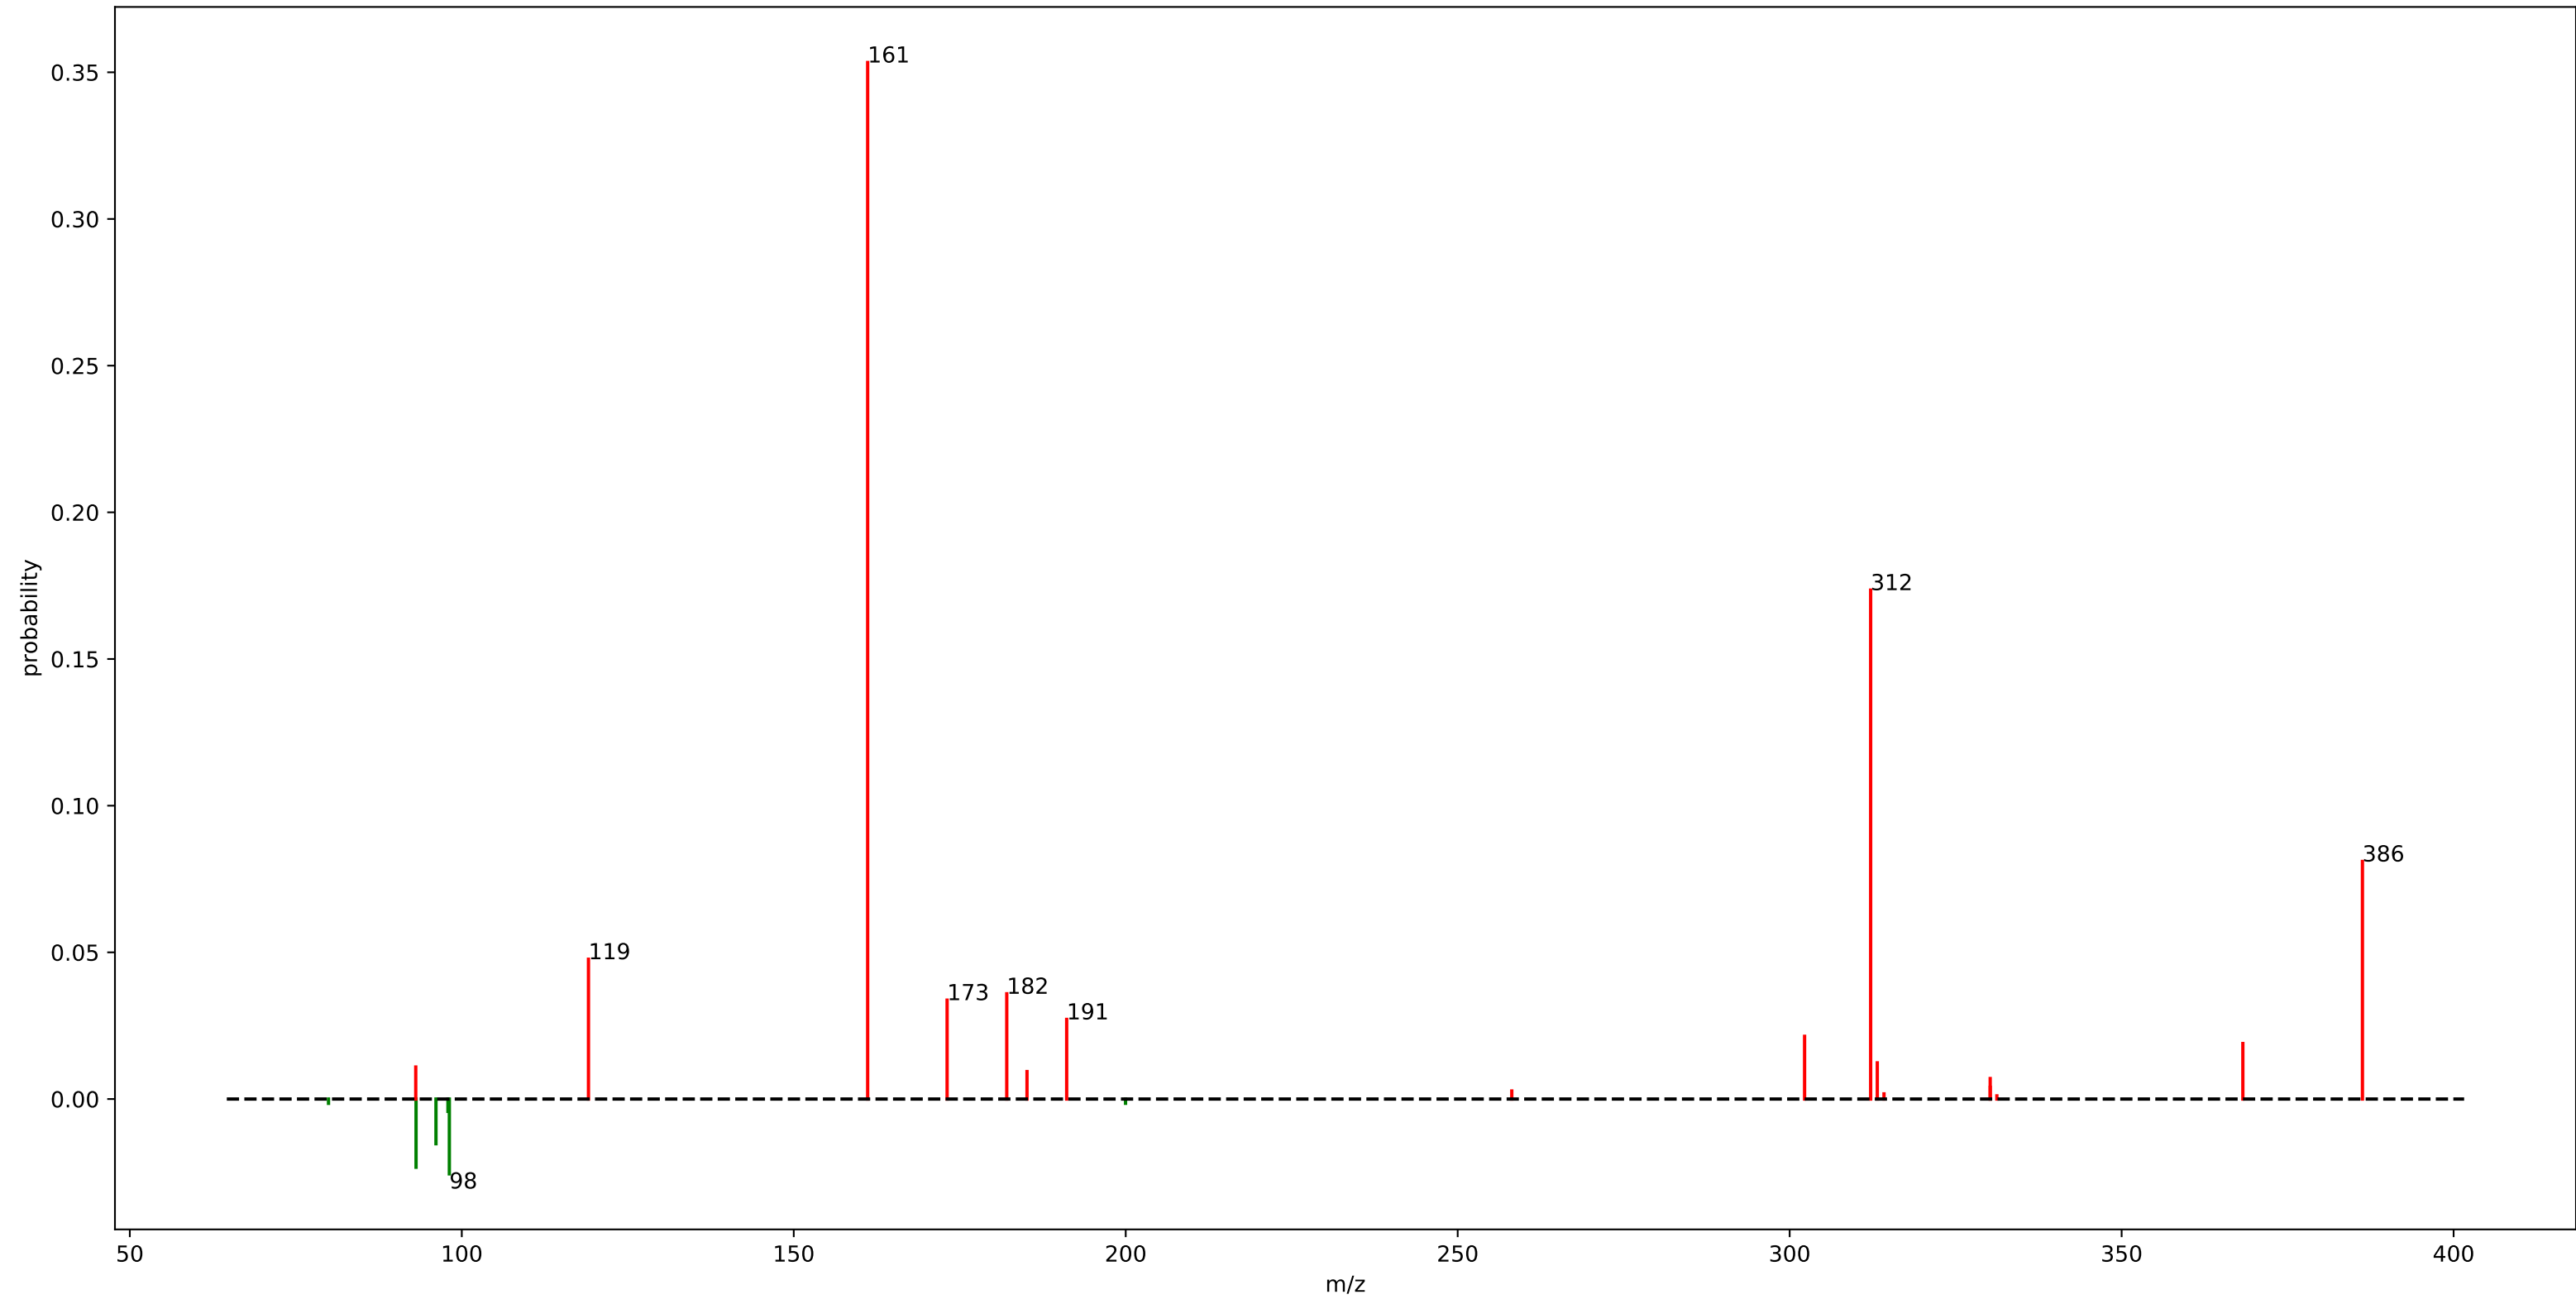

## motif\_686

|                   |        |
|-------------------|--------|
| fragment_161.1325 | : 0.35 |
| fragment_312.1975 | : 0.17 |
| fragment_386.2675 | : 0.08 |
| fragment_119.0825 | : 0.05 |
| fragment_182.0825 | : 0.04 |
| fragment_173.0975 | : 0.03 |
| fragment_191.1075 | : 0.03 |
| loss_98.1275      | : 0.03 |
| loss_93.1125      | : 0.02 |
| fragment_302.2475 | : 0.02 |
| fragment_368.2575 | : 0.02 |
| loss_96.1125      | : 0.02 |
| fragment_313.1975 | : 0.01 |
| fragment_93.0675  | : 0.01 |
| fragment_185.1325 | : 0.01 |
| fragment_330.2025 | : 0.01 |

motif\_685

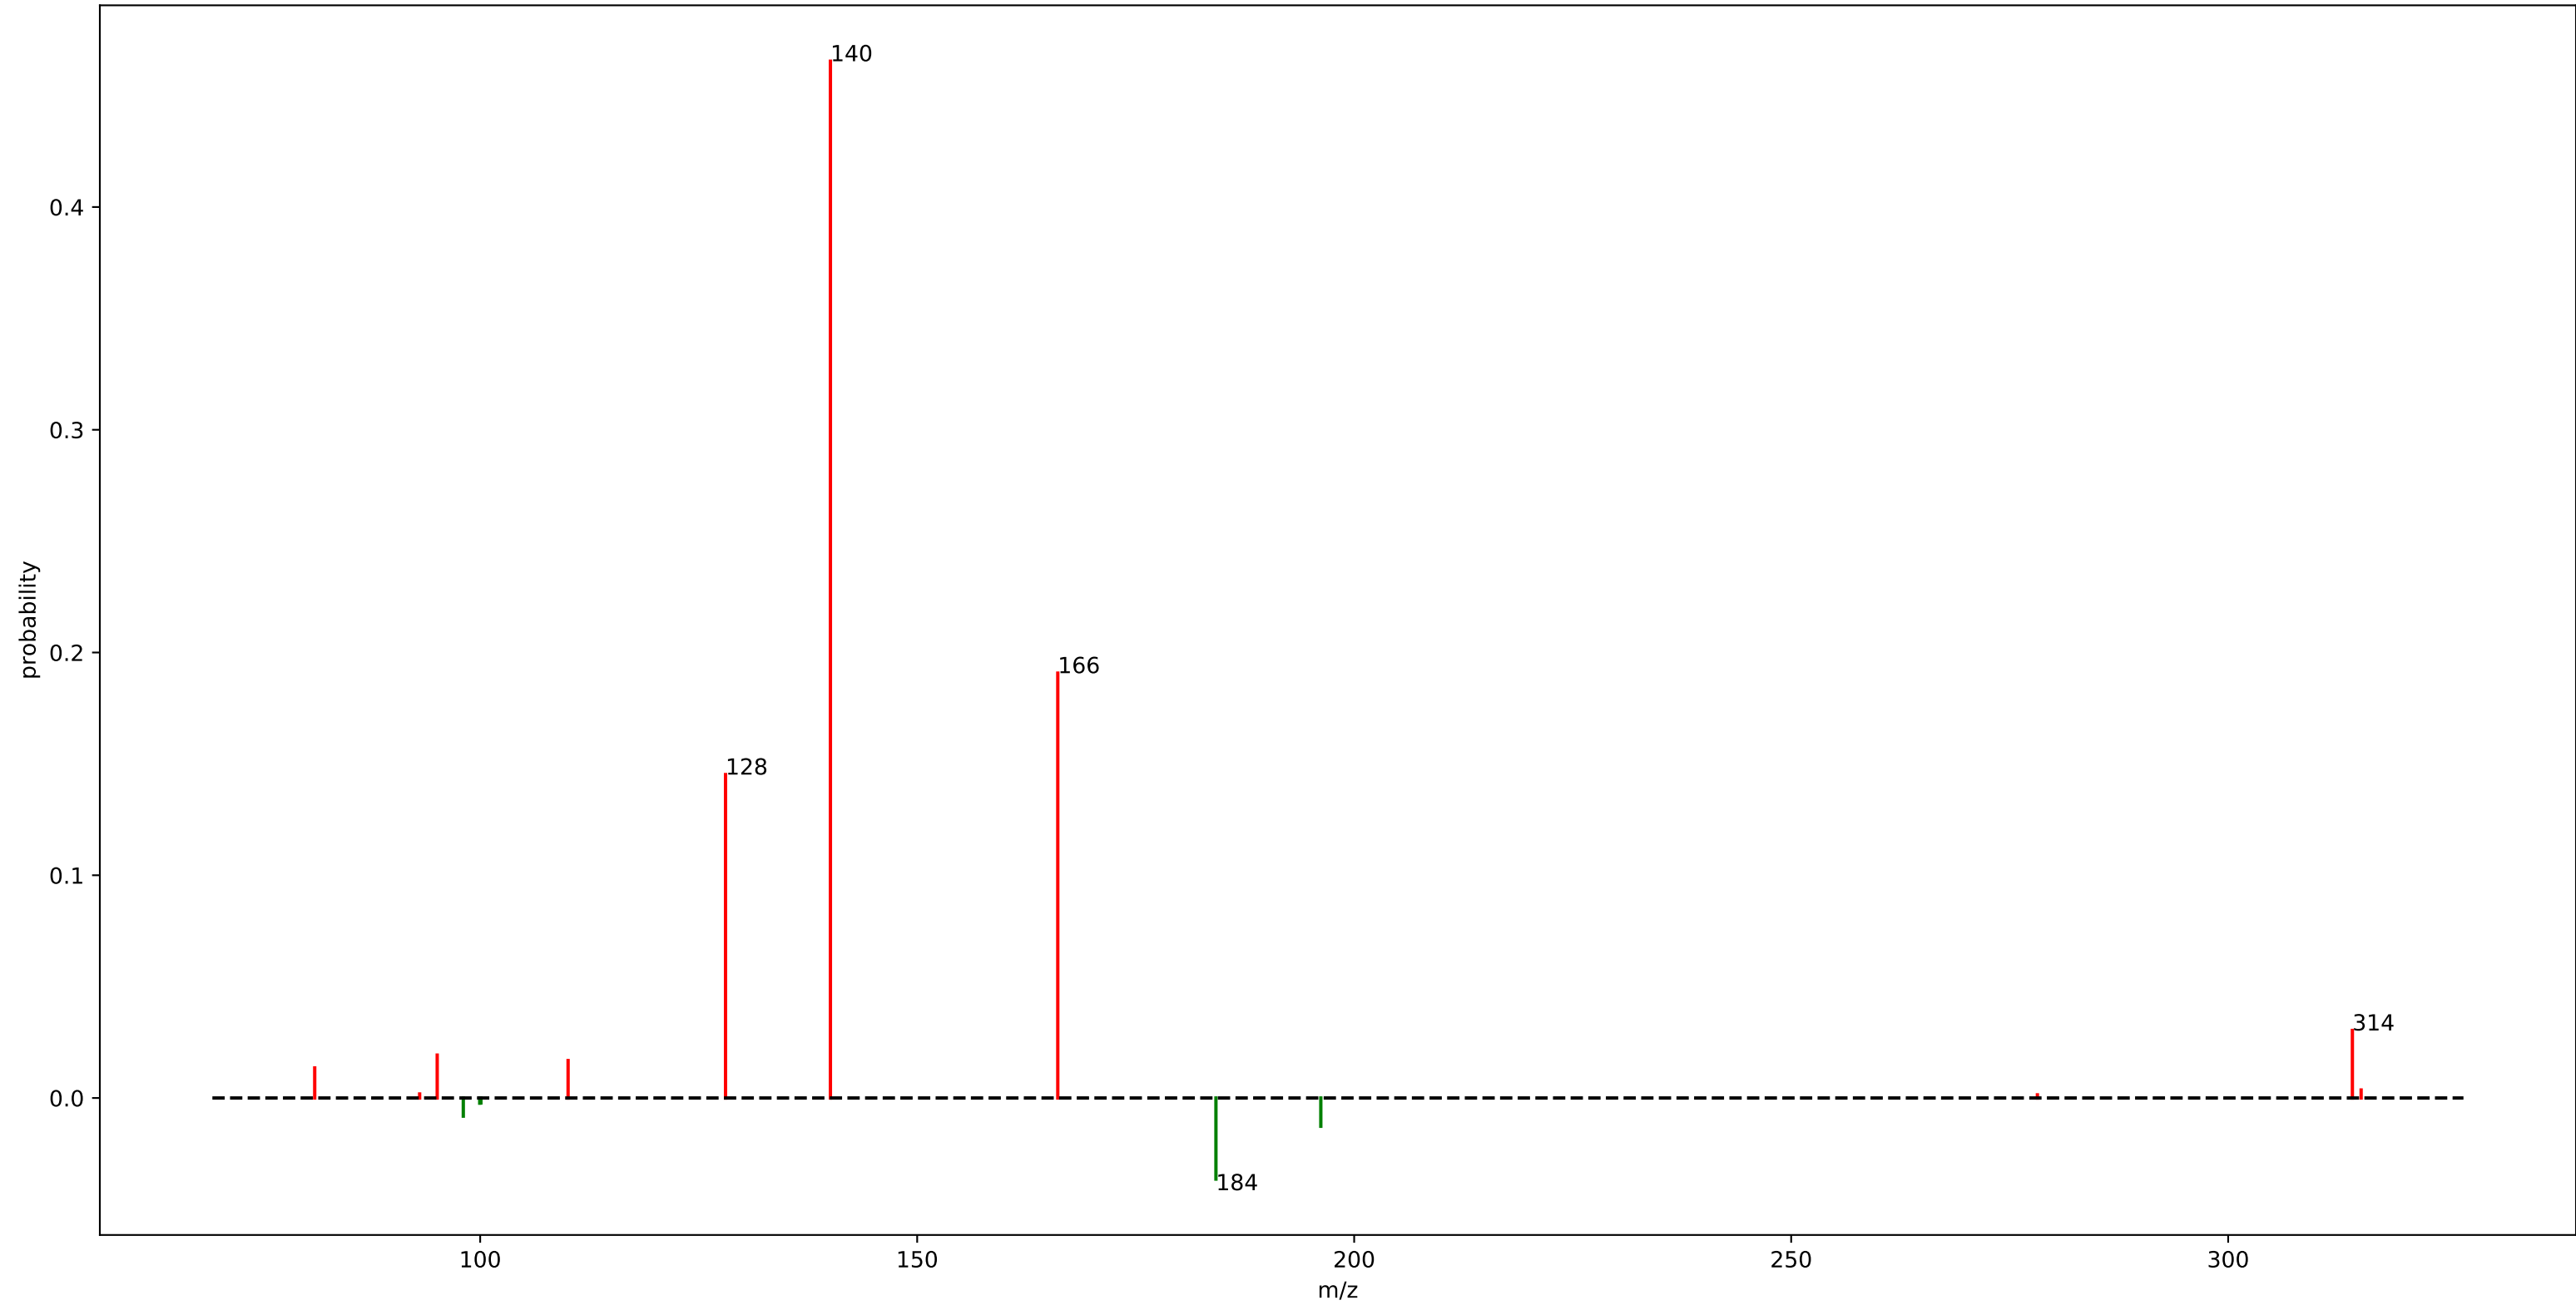

## motif\_685

|                   |        |
|-------------------|--------|
| fragment_140.0725 | : 0.47 |
| fragment_166.0875 | : 0.19 |
| fragment_128.0725 | : 0.15 |
| loss_184.1825     | : 0.04 |
| fragment_314.2125 | : 0.03 |
| fragment_95.0825  | : 0.02 |
| fragment_110.0575 | : 0.02 |
| fragment_81.0675  | : 0.01 |
| loss_196.1825     | : 0.01 |
| loss_98.0675      | : 0.01 |

motif\_684

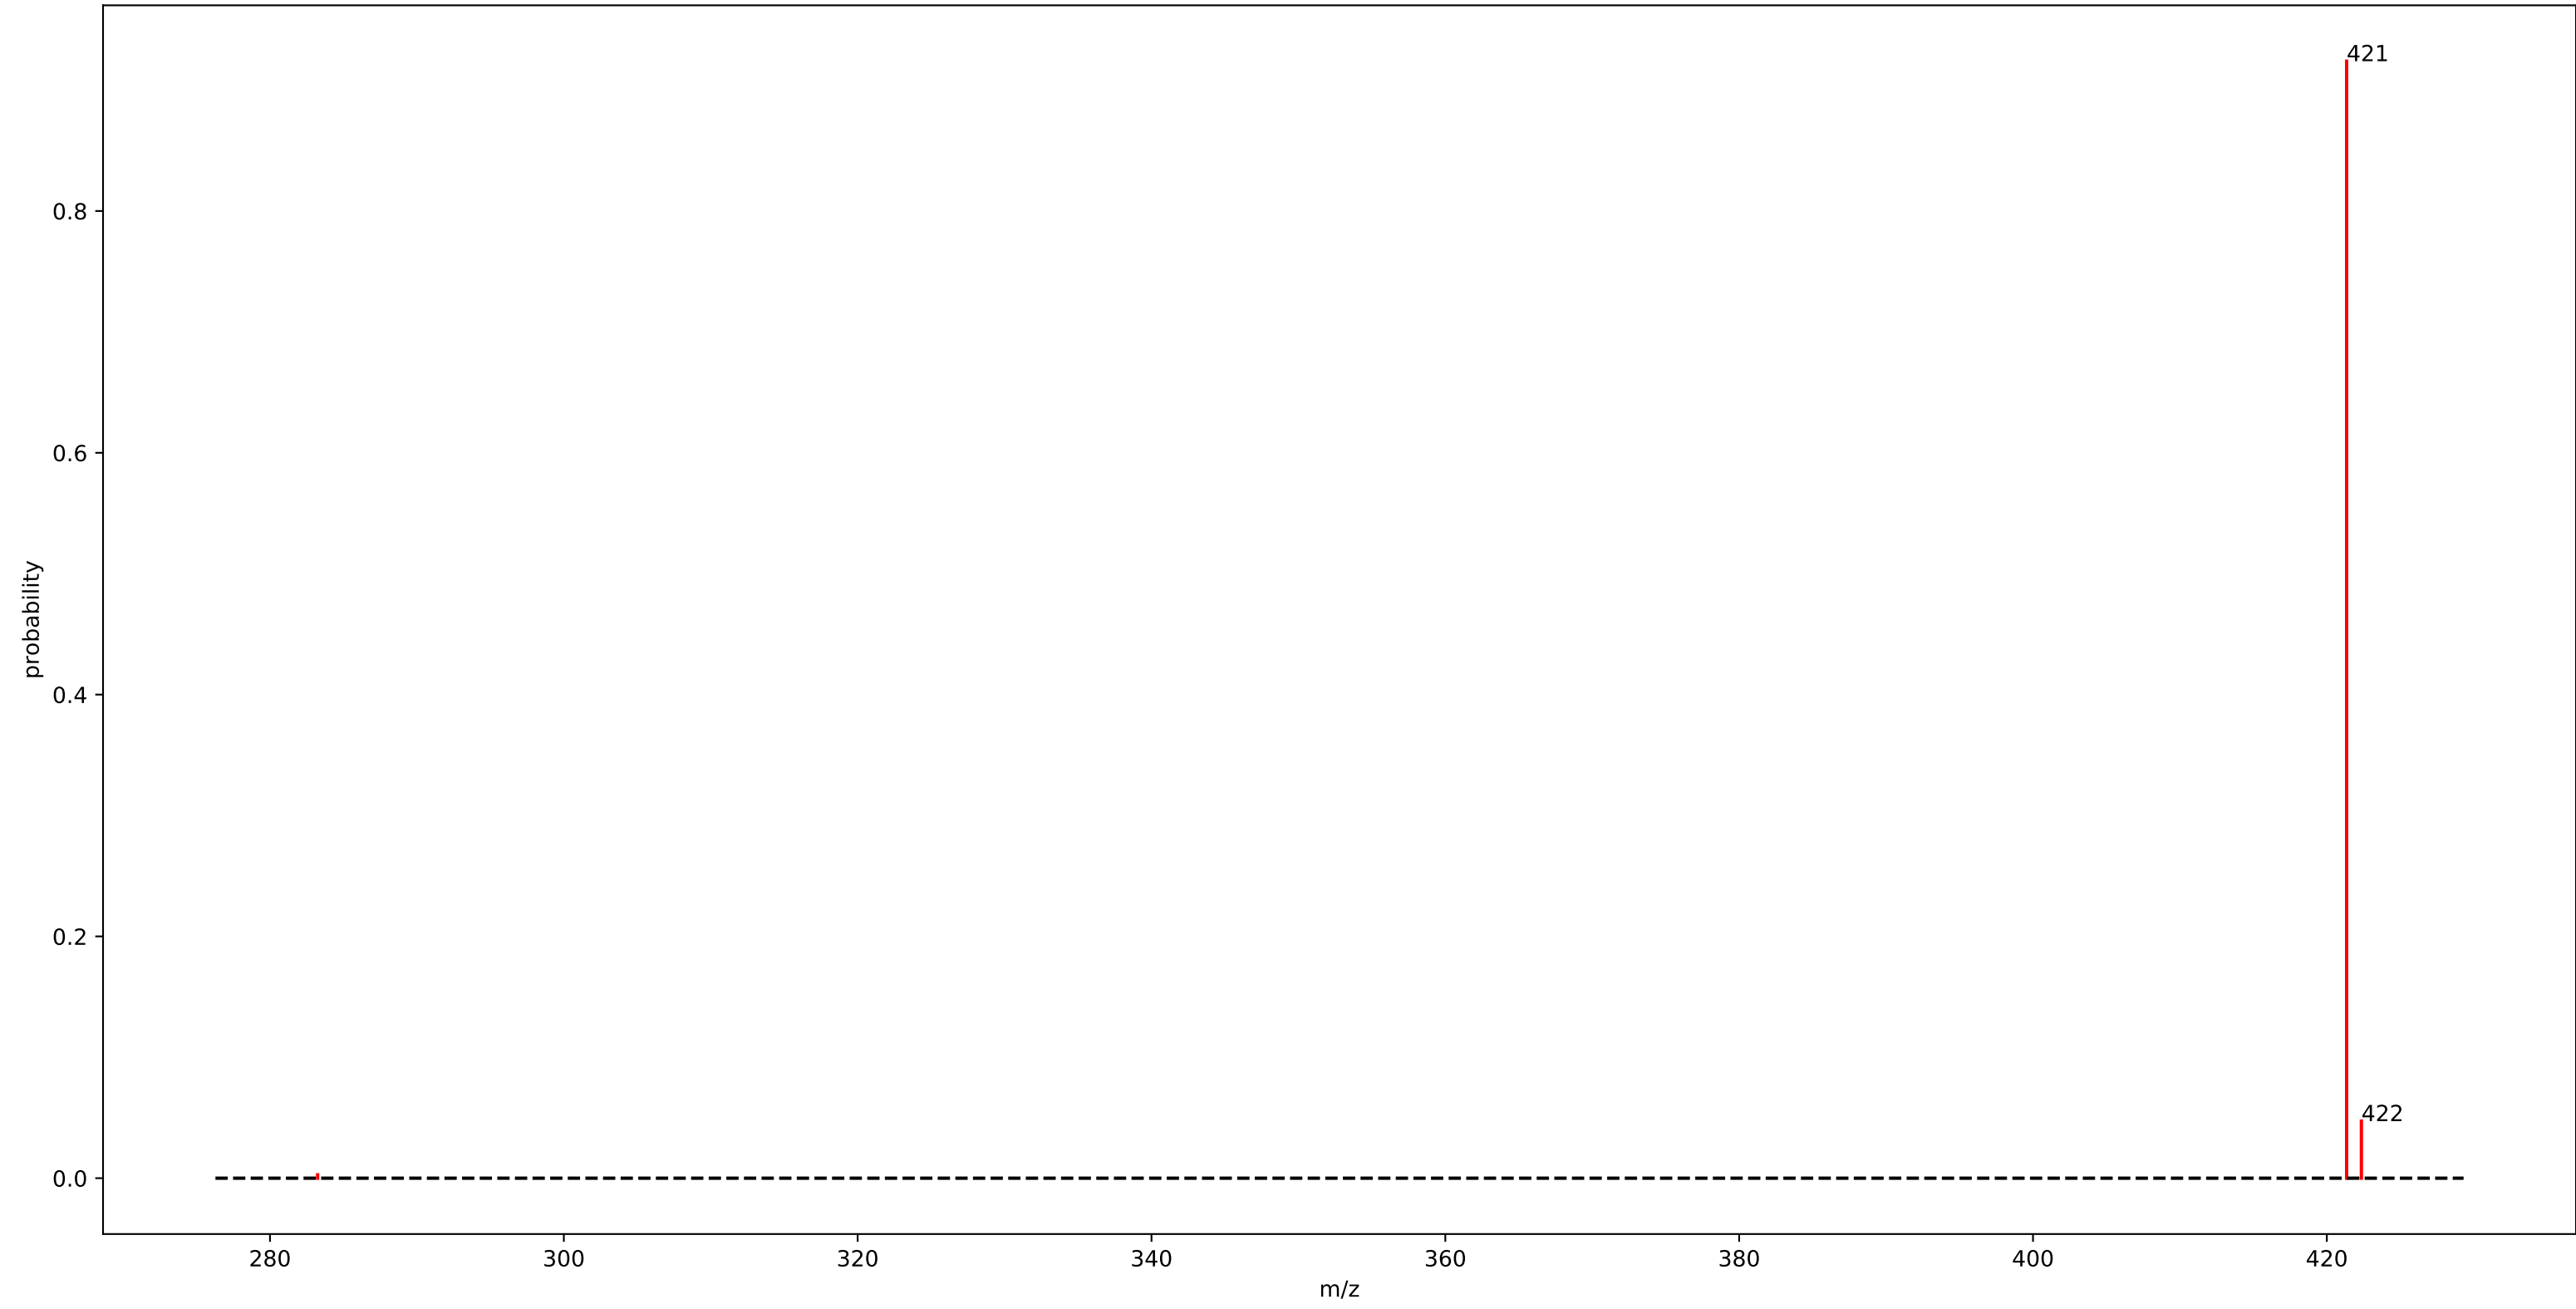

## motif\_684

fragment\_421.3475 : 0.92  
fragment\_422.3525 : 0.05



gnps\_motif\_58.m2m

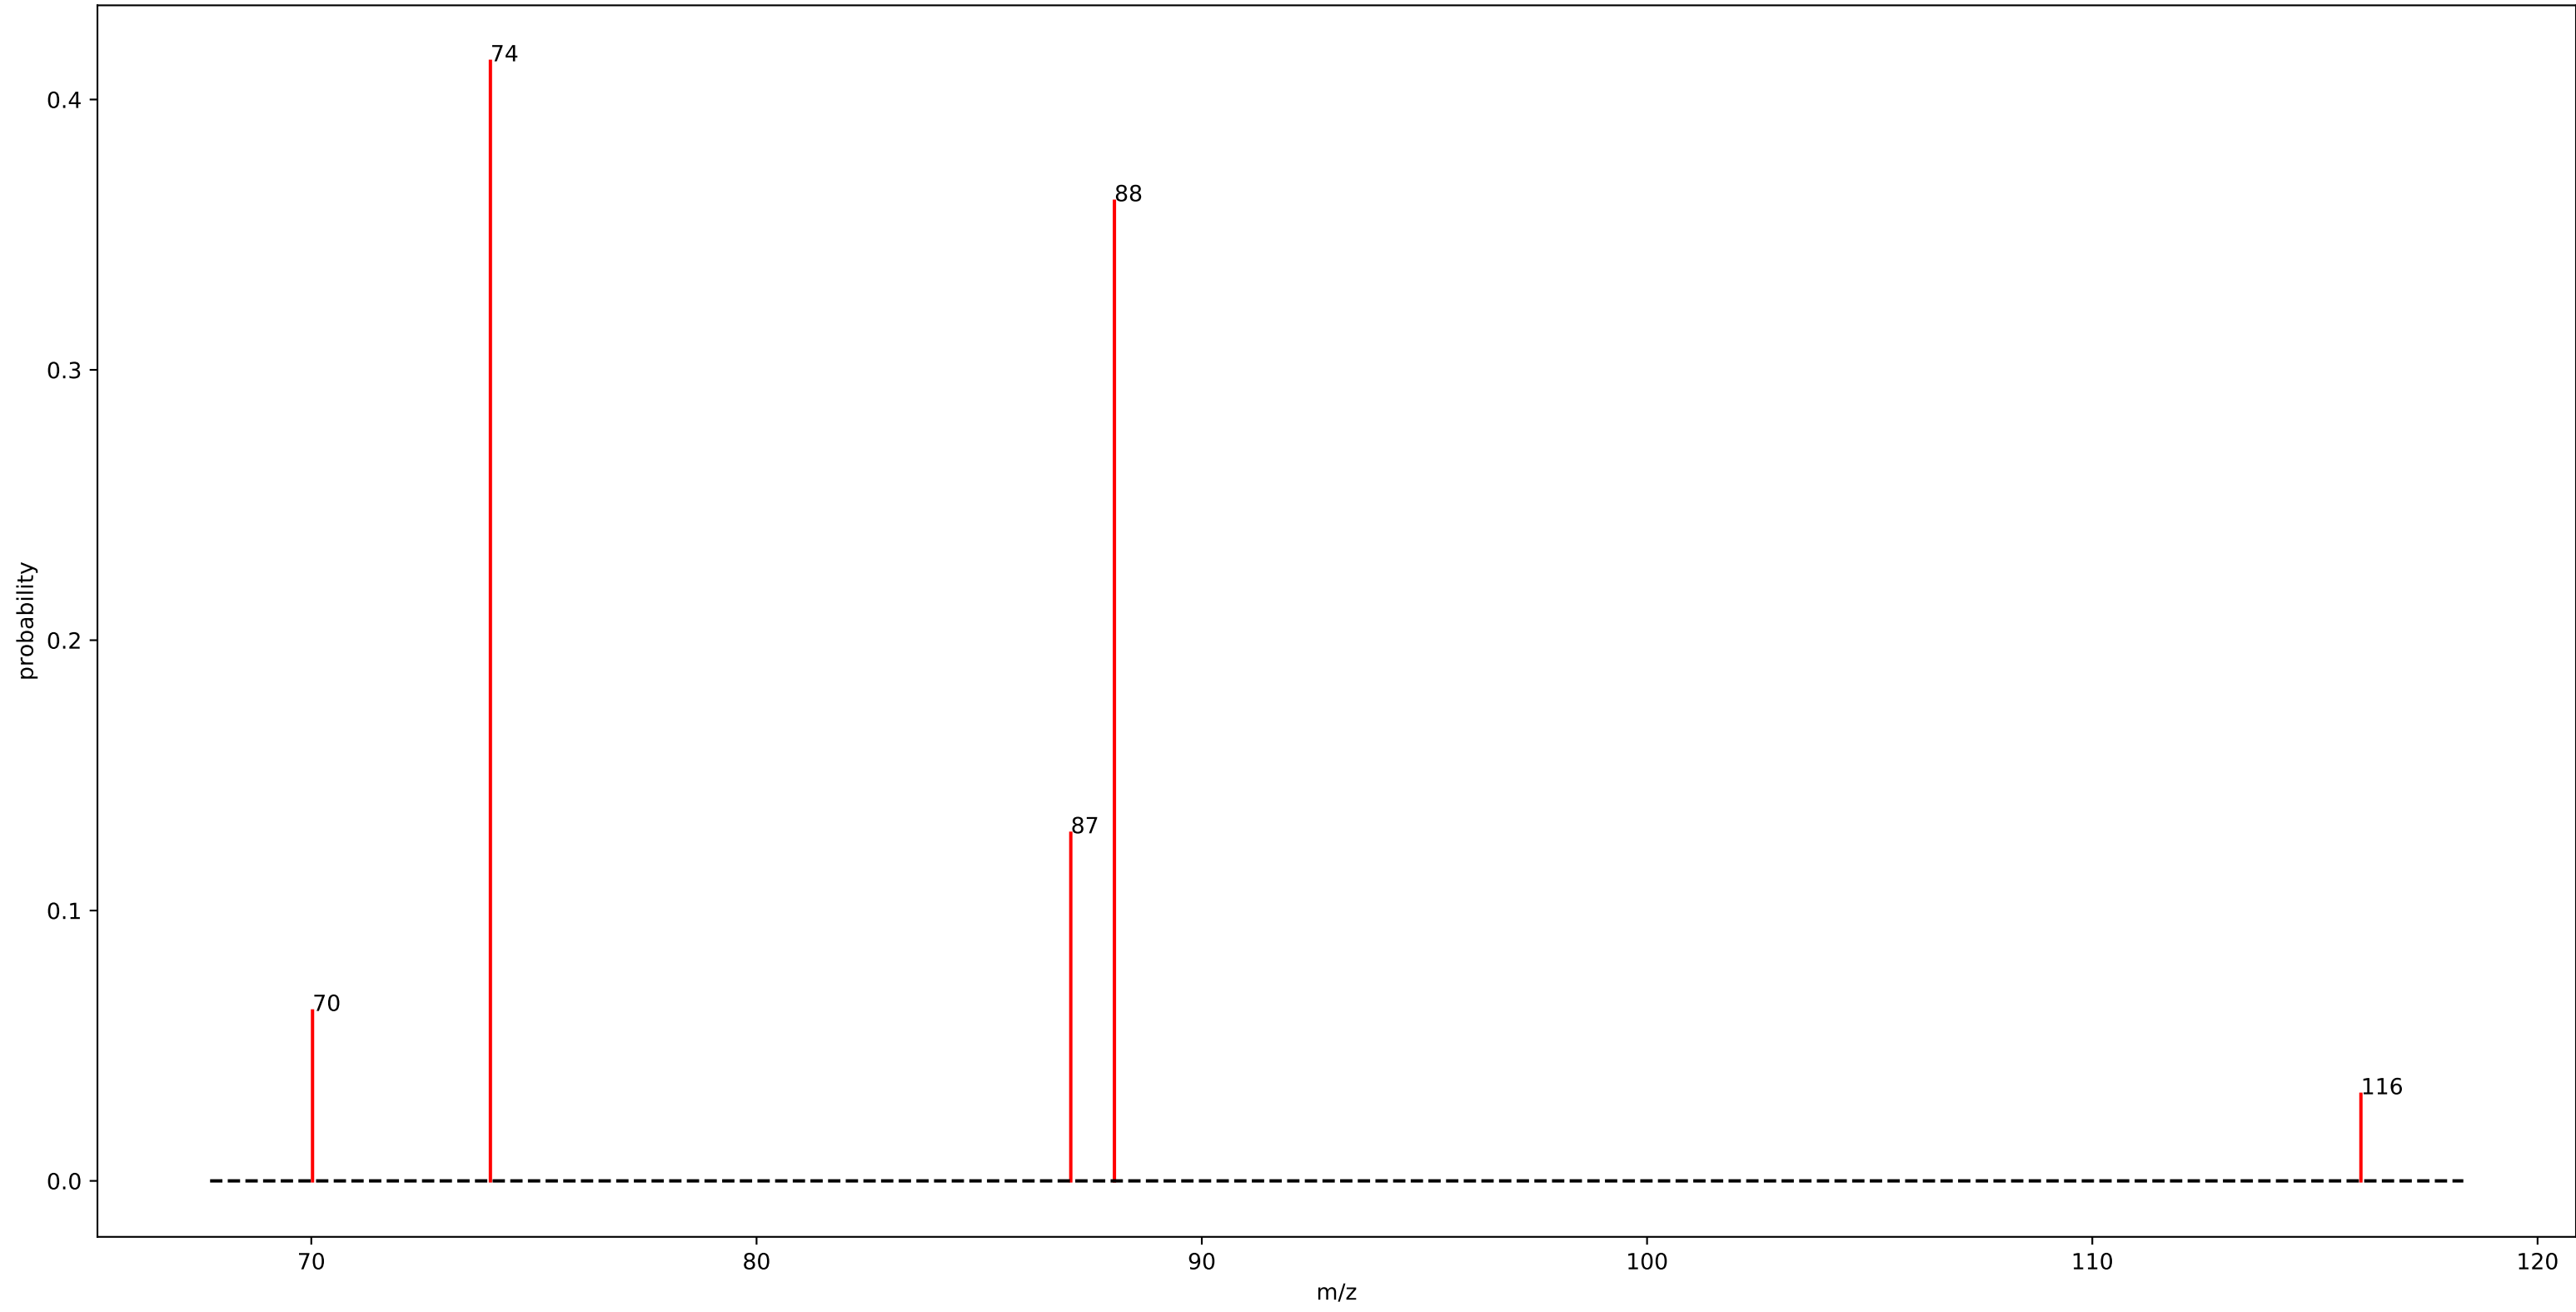

## gnps\_motif\_58.m2m

|                   |        |
|-------------------|--------|
| fragment_74.0225  | : 0.41 |
| fragment_88.0375  | : 0.36 |
| fragment_87.0575  | : 0.13 |
| fragment_70.0275  | : 0.06 |
| fragment_116.0325 | : 0.03 |

motif\_688

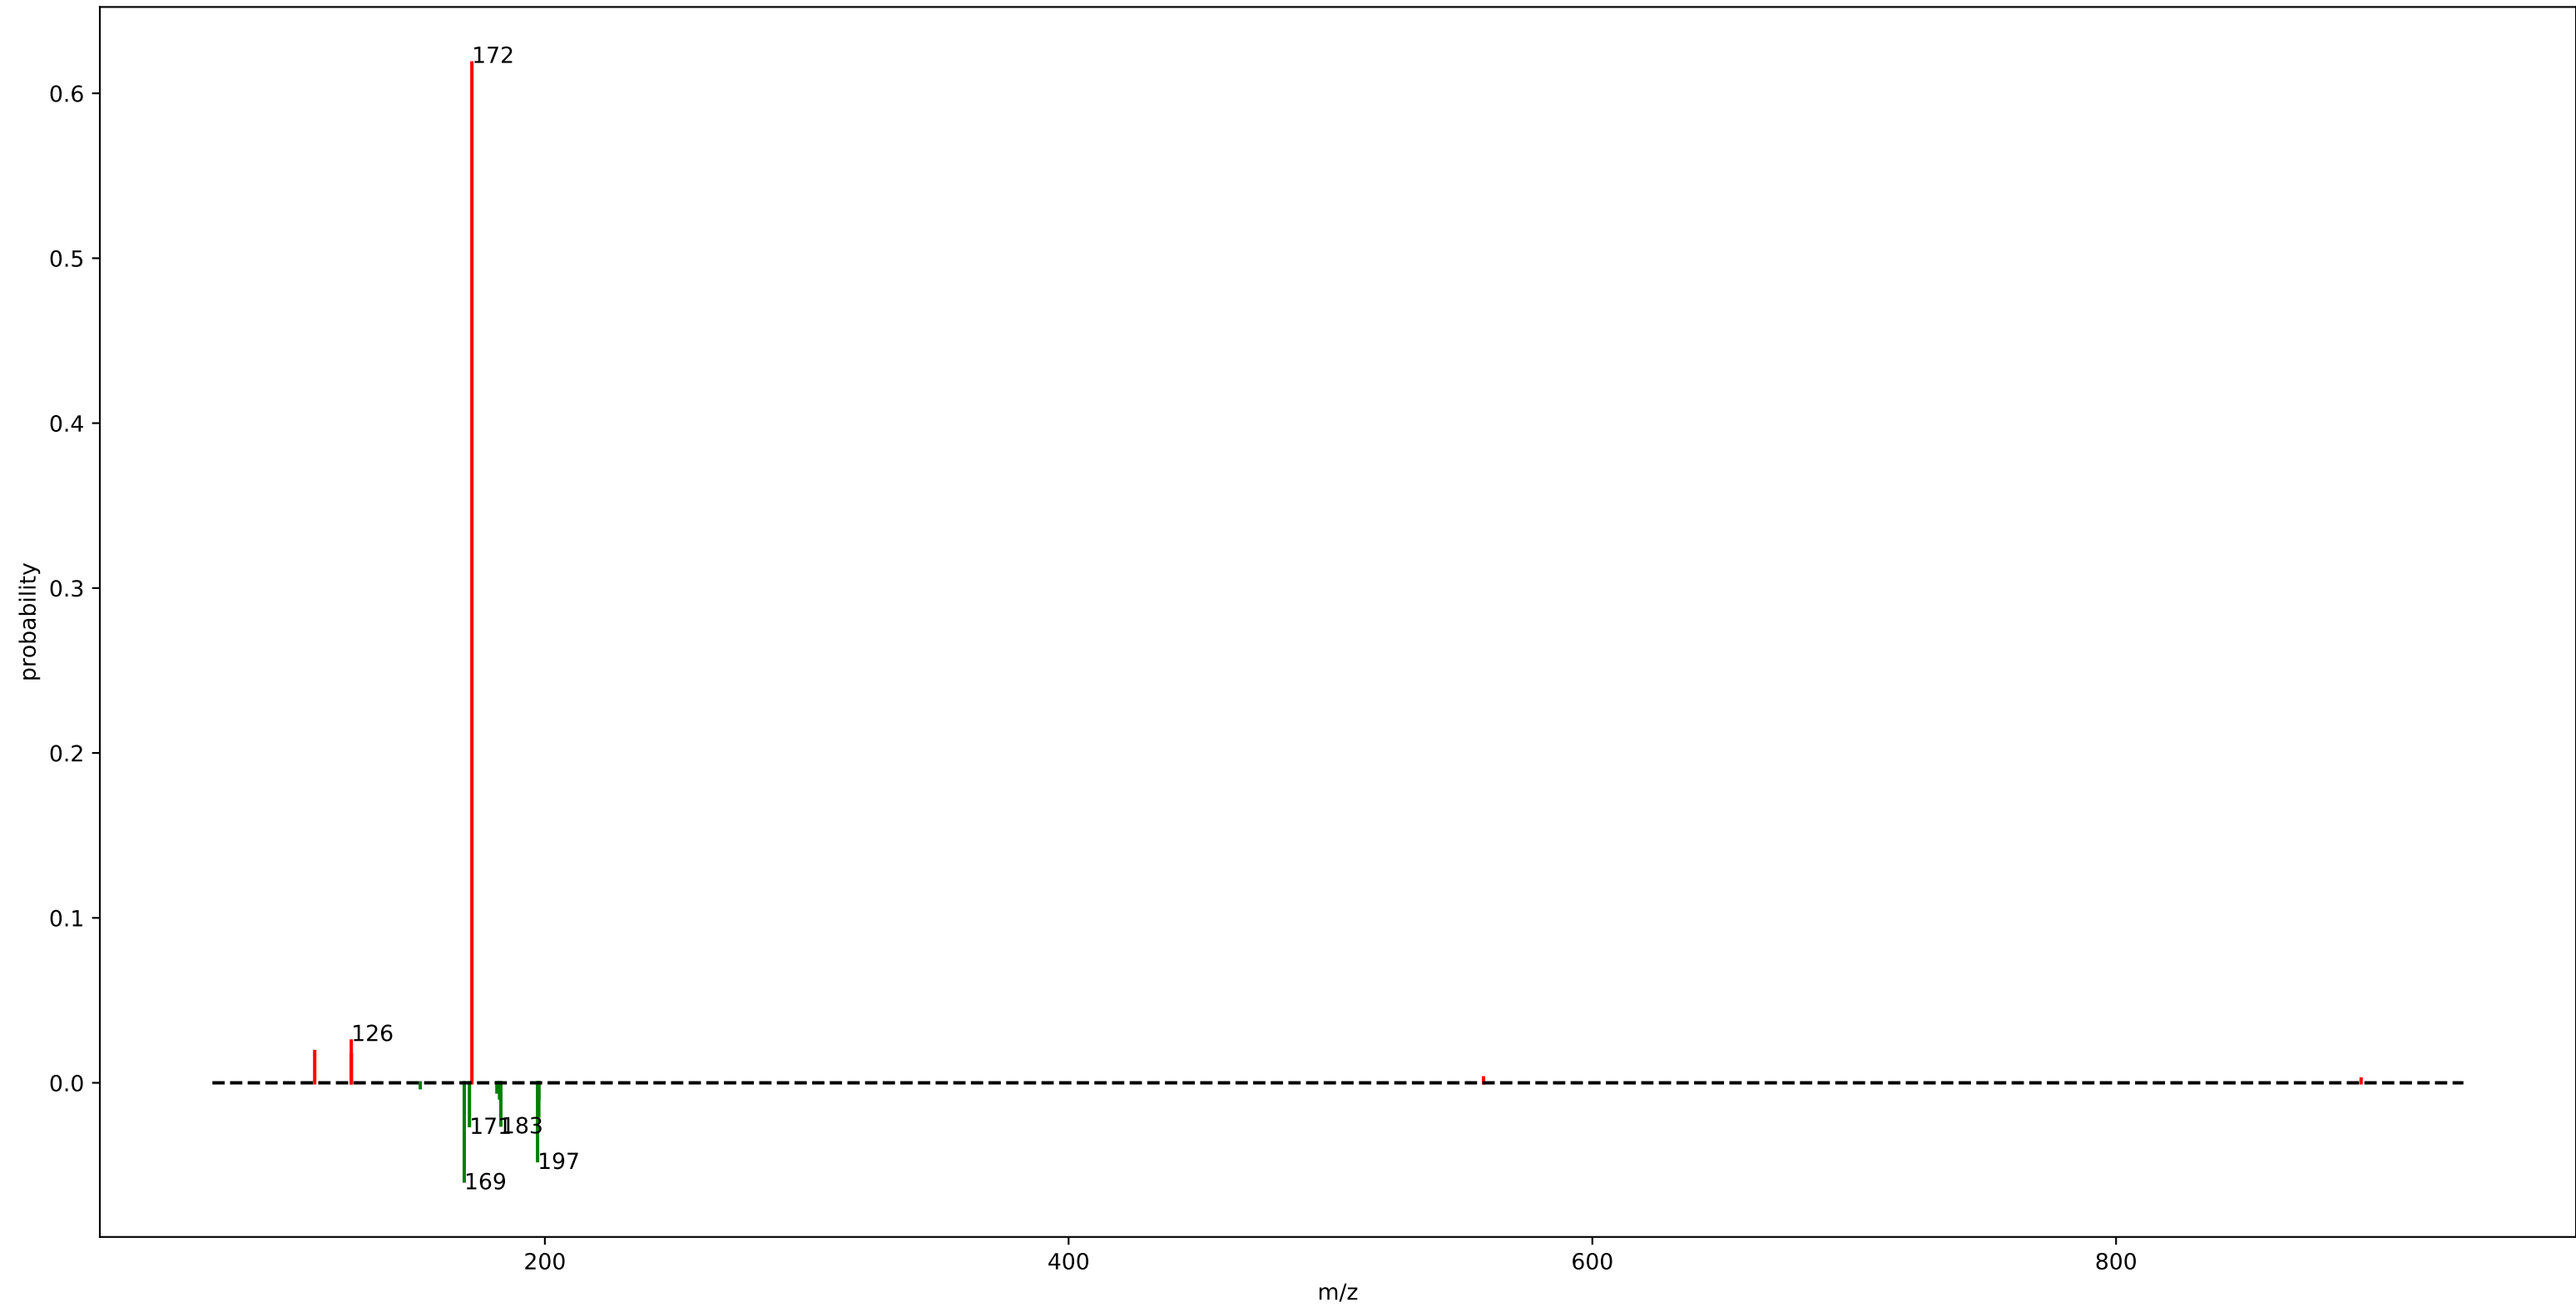

## motif\_688

|                   |        |
|-------------------|--------|
| fragment_172.1325 | : 0.62 |
| loss_169.2175     | : 0.06 |
| loss_197.2125     | : 0.05 |
| loss_171.1975     | : 0.03 |
| loss_183.1975     | : 0.03 |
| fragment_126.0875 | : 0.03 |
| loss_197.6925     | : 0.02 |
| fragment_112.1125 | : 0.02 |
| fragment_126.0975 | : 0.02 |
| loss_182.6875     | : 0.01 |
| loss_197.6825     | : 0.01 |
| loss_181.6775     | : 0.01 |

euphorbia\_motif\_18.m2m

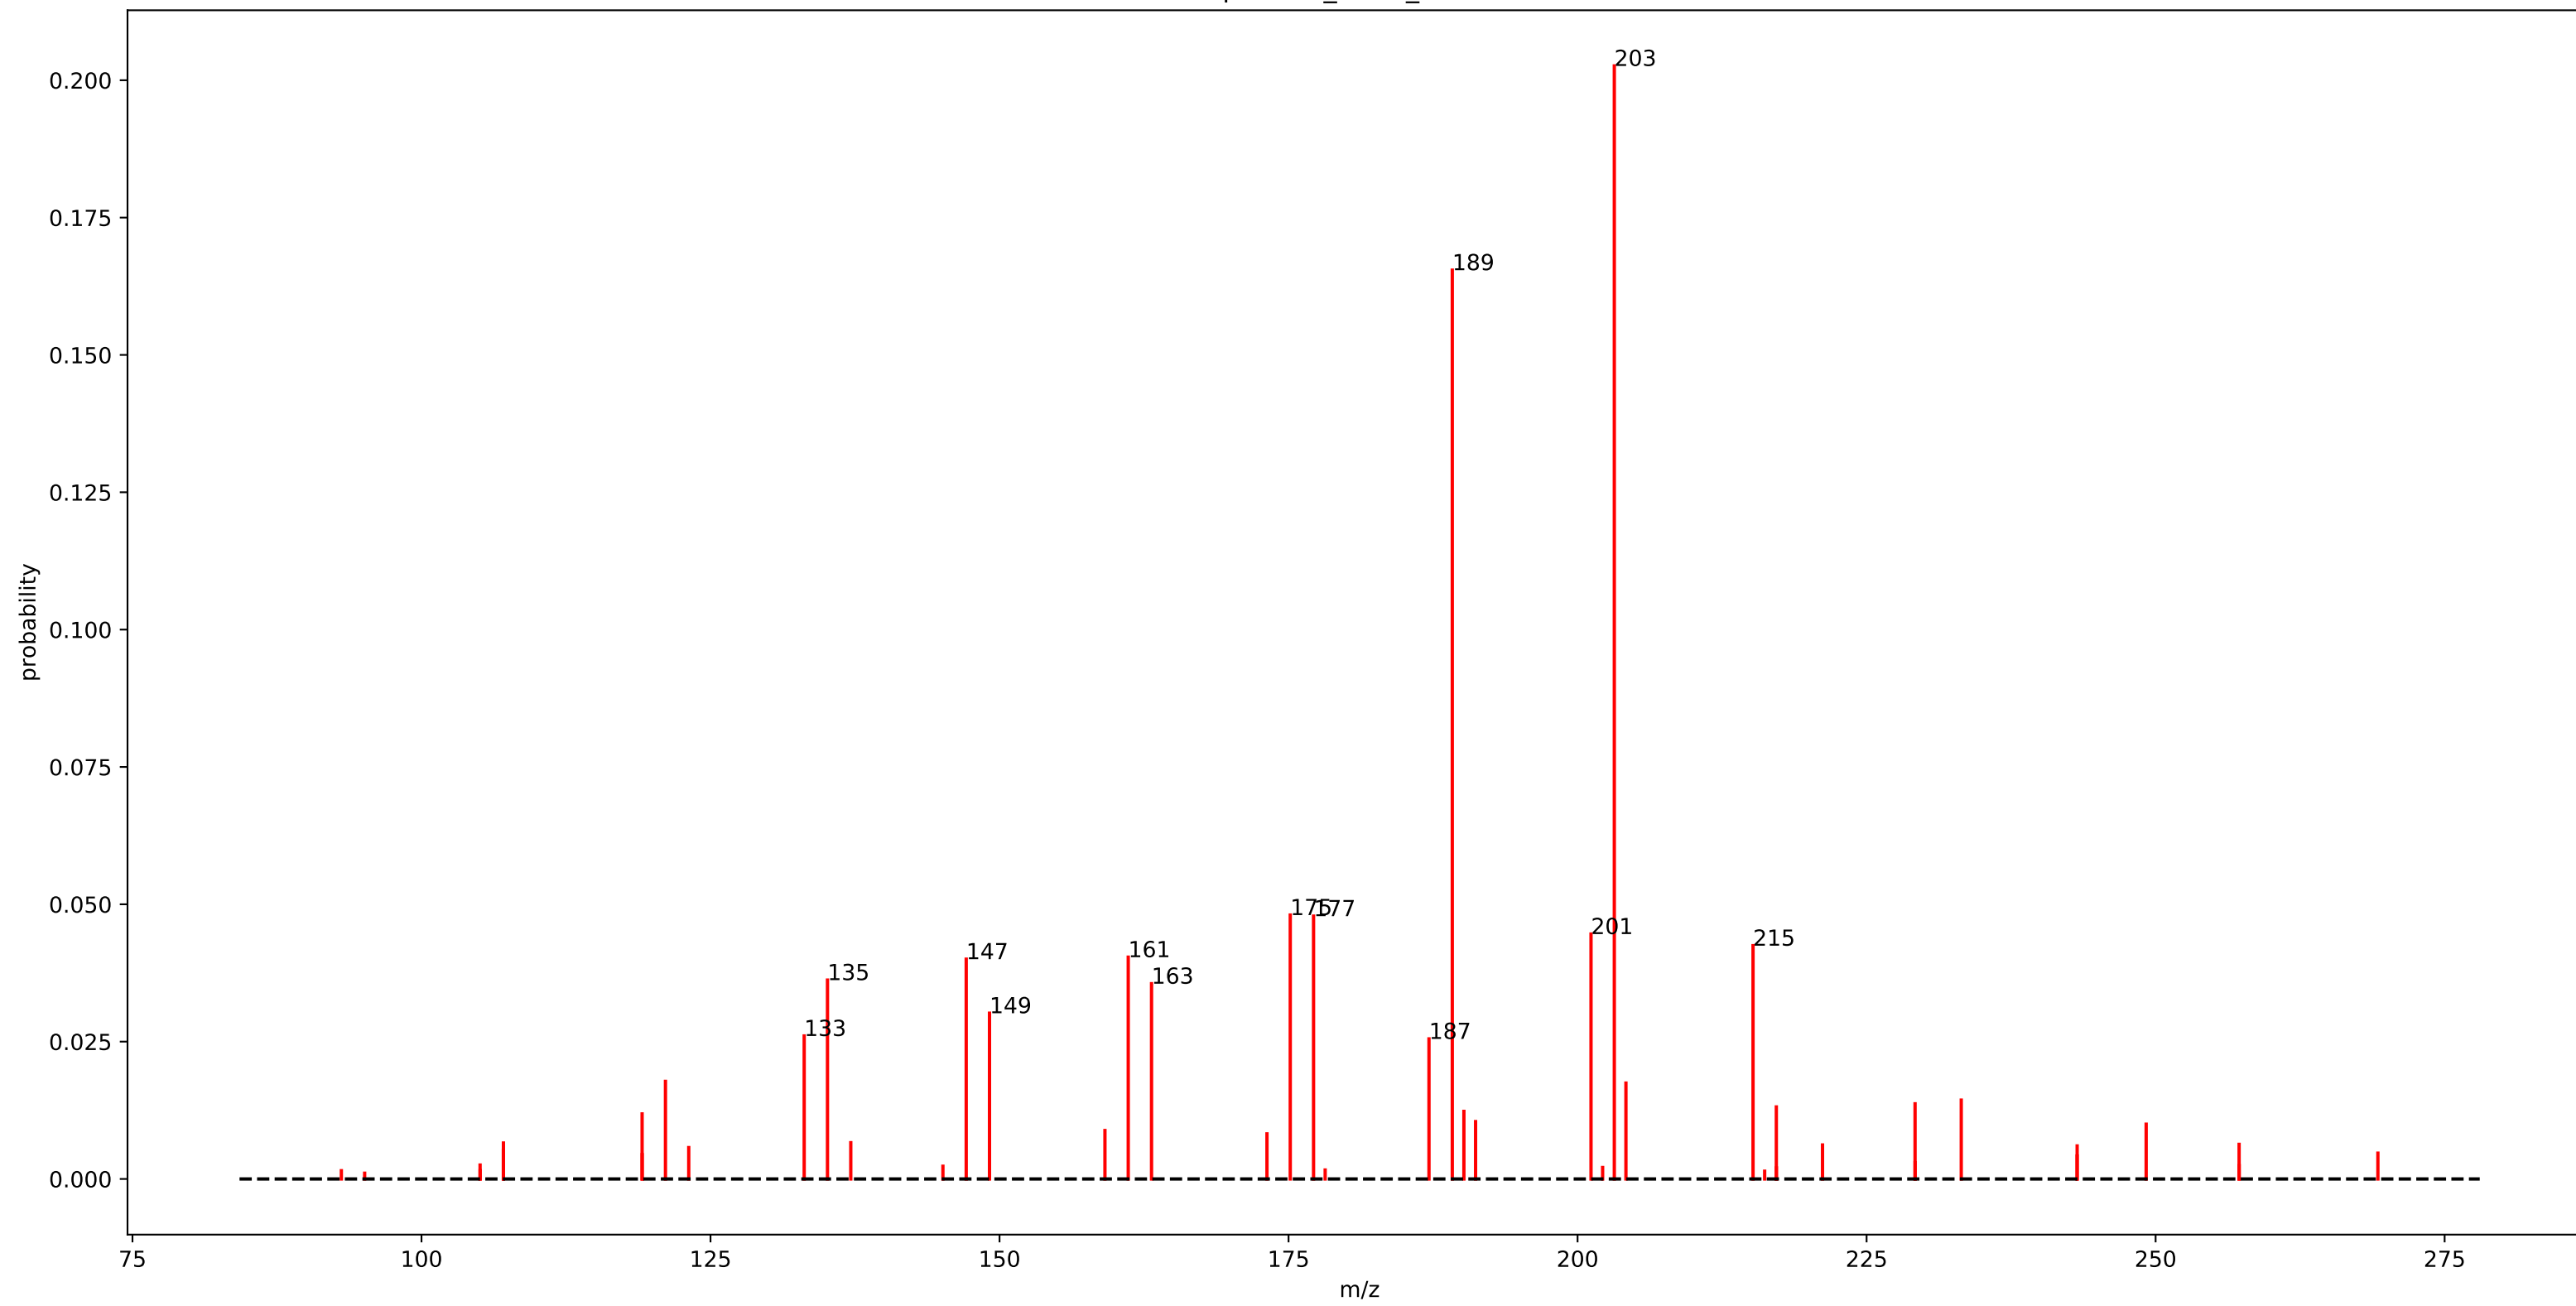

# euphorbia\_motif\_18.m2m

|                   |        |                   |        |
|-------------------|--------|-------------------|--------|
| fragment_203.1775 | : 0.20 | fragment_191.1775 | : 0.01 |
| fragment_189.1625 | : 0.17 | fragment_249.1825 | : 0.01 |
| fragment_175.1475 | : 0.05 | fragment_159.1175 | : 0.01 |
| fragment_177.1625 | : 0.05 | fragment_173.1325 | : 0.01 |
| fragment_201.1625 | : 0.04 | fragment_137.1325 | : 0.01 |
| fragment_215.1775 | : 0.04 | fragment_107.0875 | : 0.01 |
| fragment_161.1325 | : 0.04 | fragment_257.2225 | : 0.01 |
| fragment_147.1175 | : 0.04 | fragment_221.1875 | : 0.01 |
| fragment_135.1175 | : 0.04 | fragment_243.2125 | : 0.01 |
| fragment_163.1475 | : 0.04 | fragment_123.1175 | : 0.01 |
| fragment_149.1325 | : 0.03 | fragment_107.0825 | : 0.01 |
| fragment_133.1025 | : 0.03 |                   |        |
| fragment_187.1475 | : 0.03 |                   |        |
| fragment_121.1025 | : 0.02 |                   |        |
| fragment_204.1825 | : 0.02 |                   |        |
| fragment_233.1875 | : 0.01 |                   |        |
| fragment_229.1925 | : 0.01 |                   |        |
| fragment_217.1925 | : 0.01 |                   |        |
| fragment_190.1675 | : 0.01 |                   |        |
| fragment_119.0825 | : 0.01 |                   |        |

motif\_410

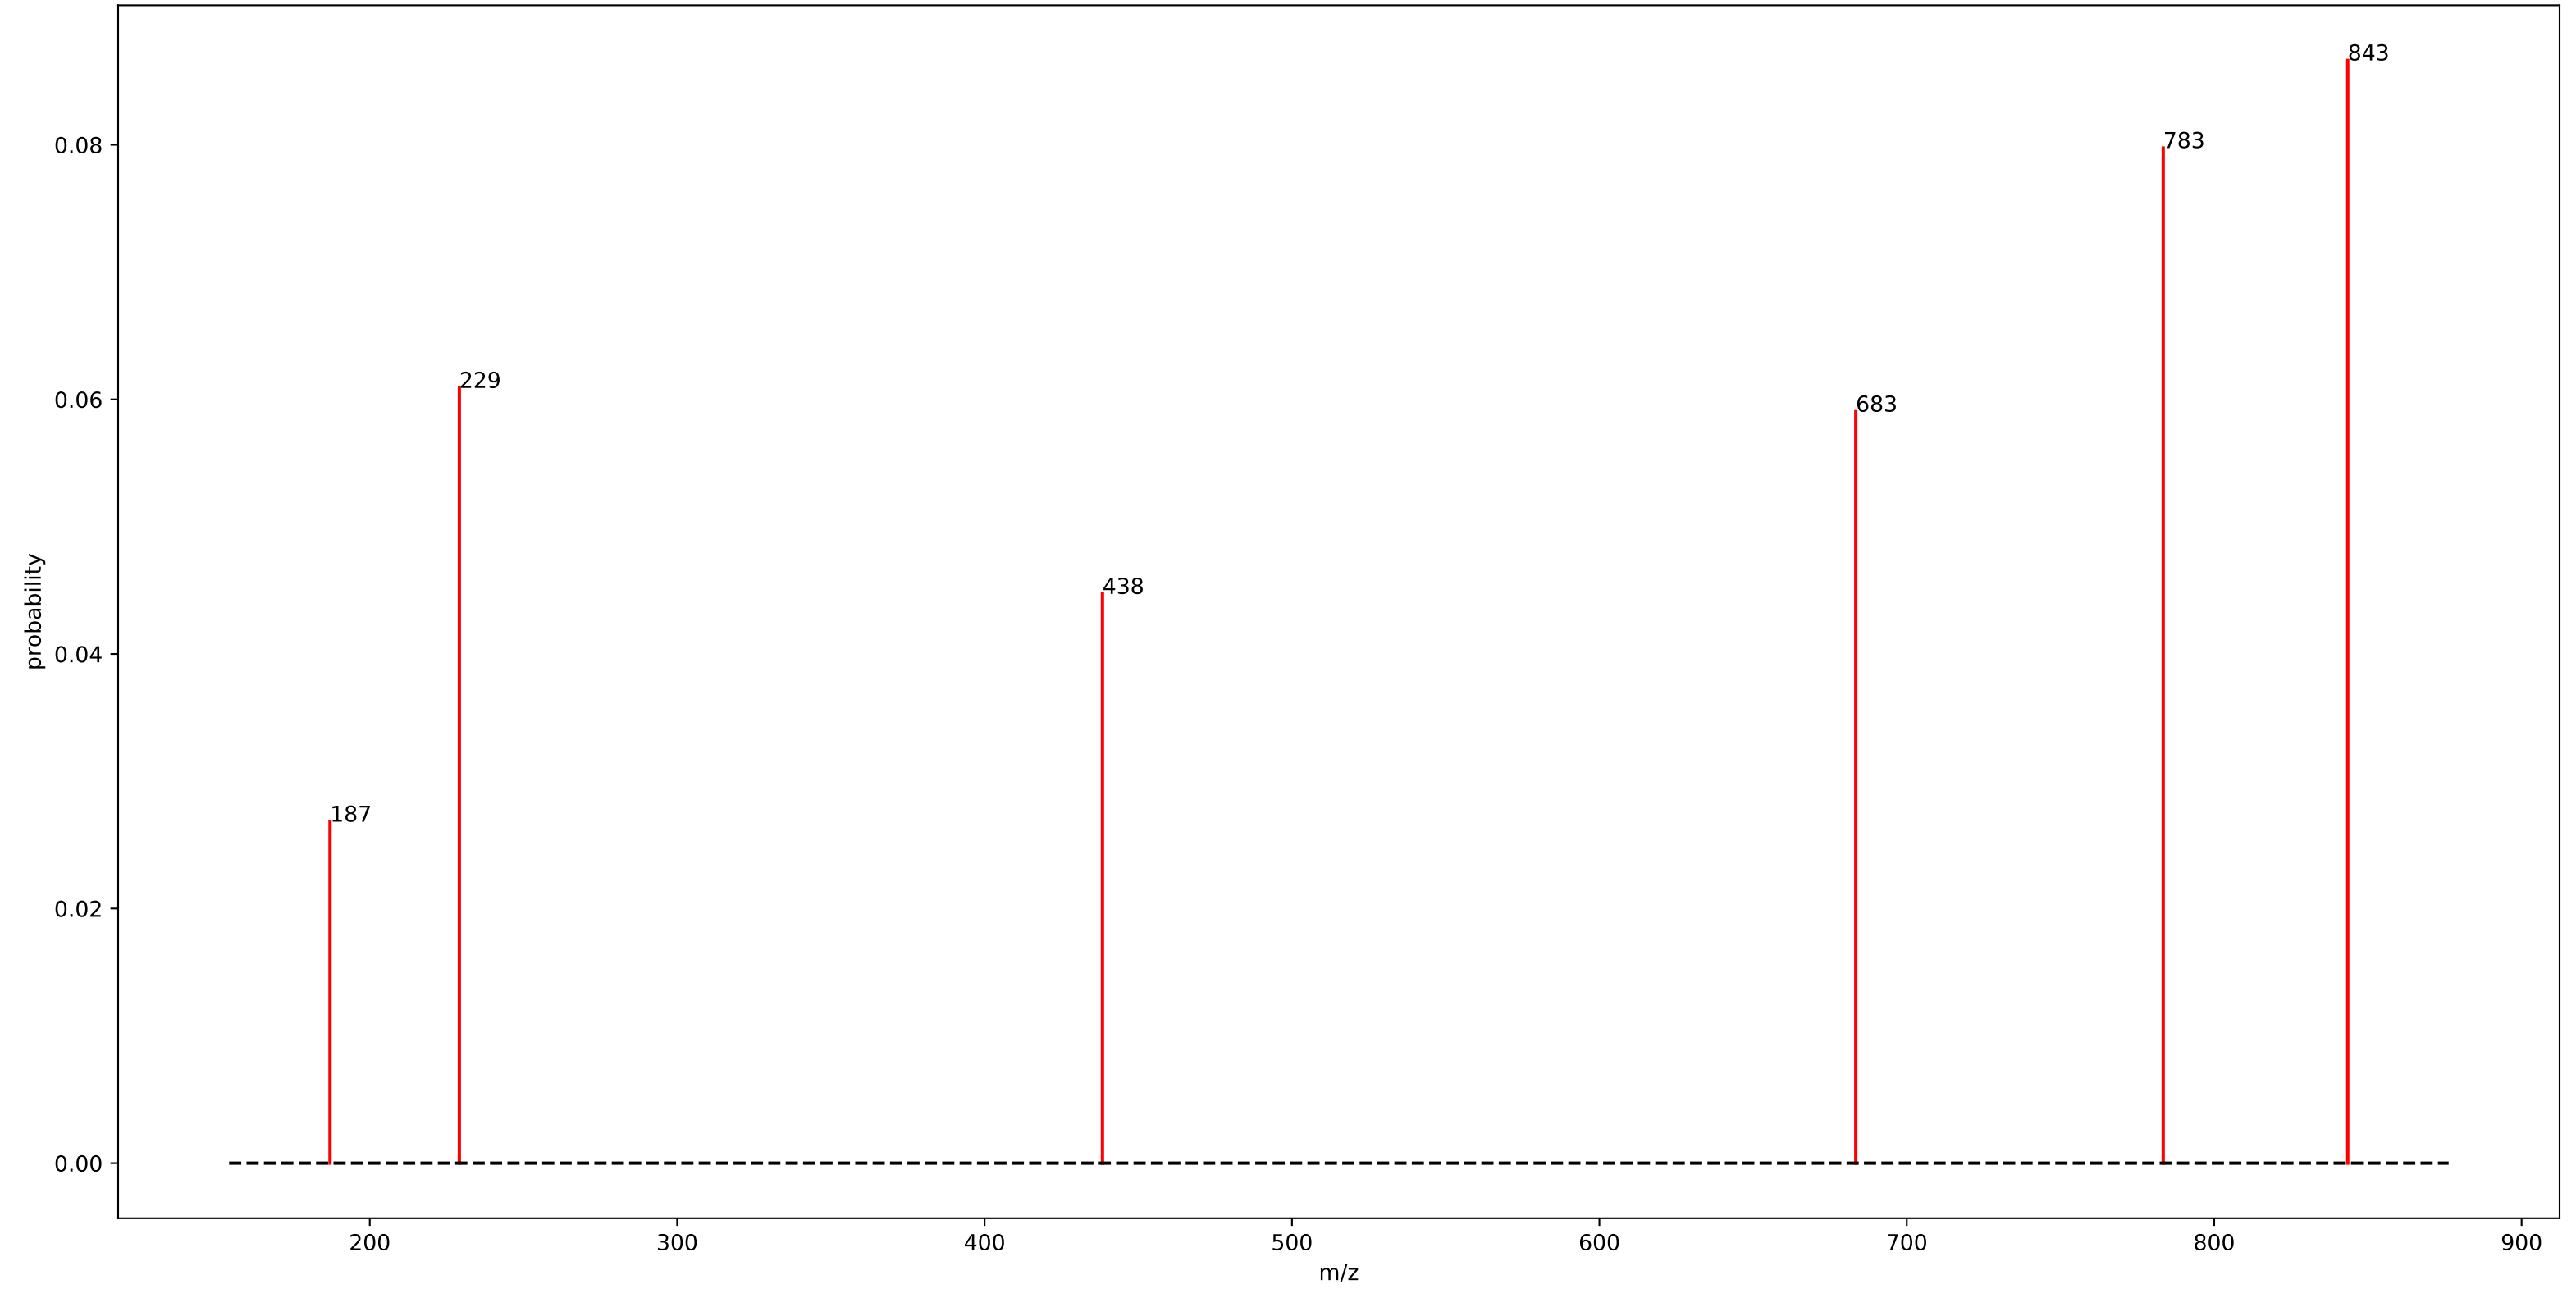

## motif\_410

|                   |        |
|-------------------|--------|
| fragment_843.4425 | : 0.09 |
| fragment_783.4175 | : 0.08 |
| fragment_229.1325 | : 0.06 |
| fragment_683.4175 | : 0.06 |
| fragment_438.3425 | : 0.04 |
| fragment_187.0625 | : 0.03 |



rhabdus\_motif\_40.m2m

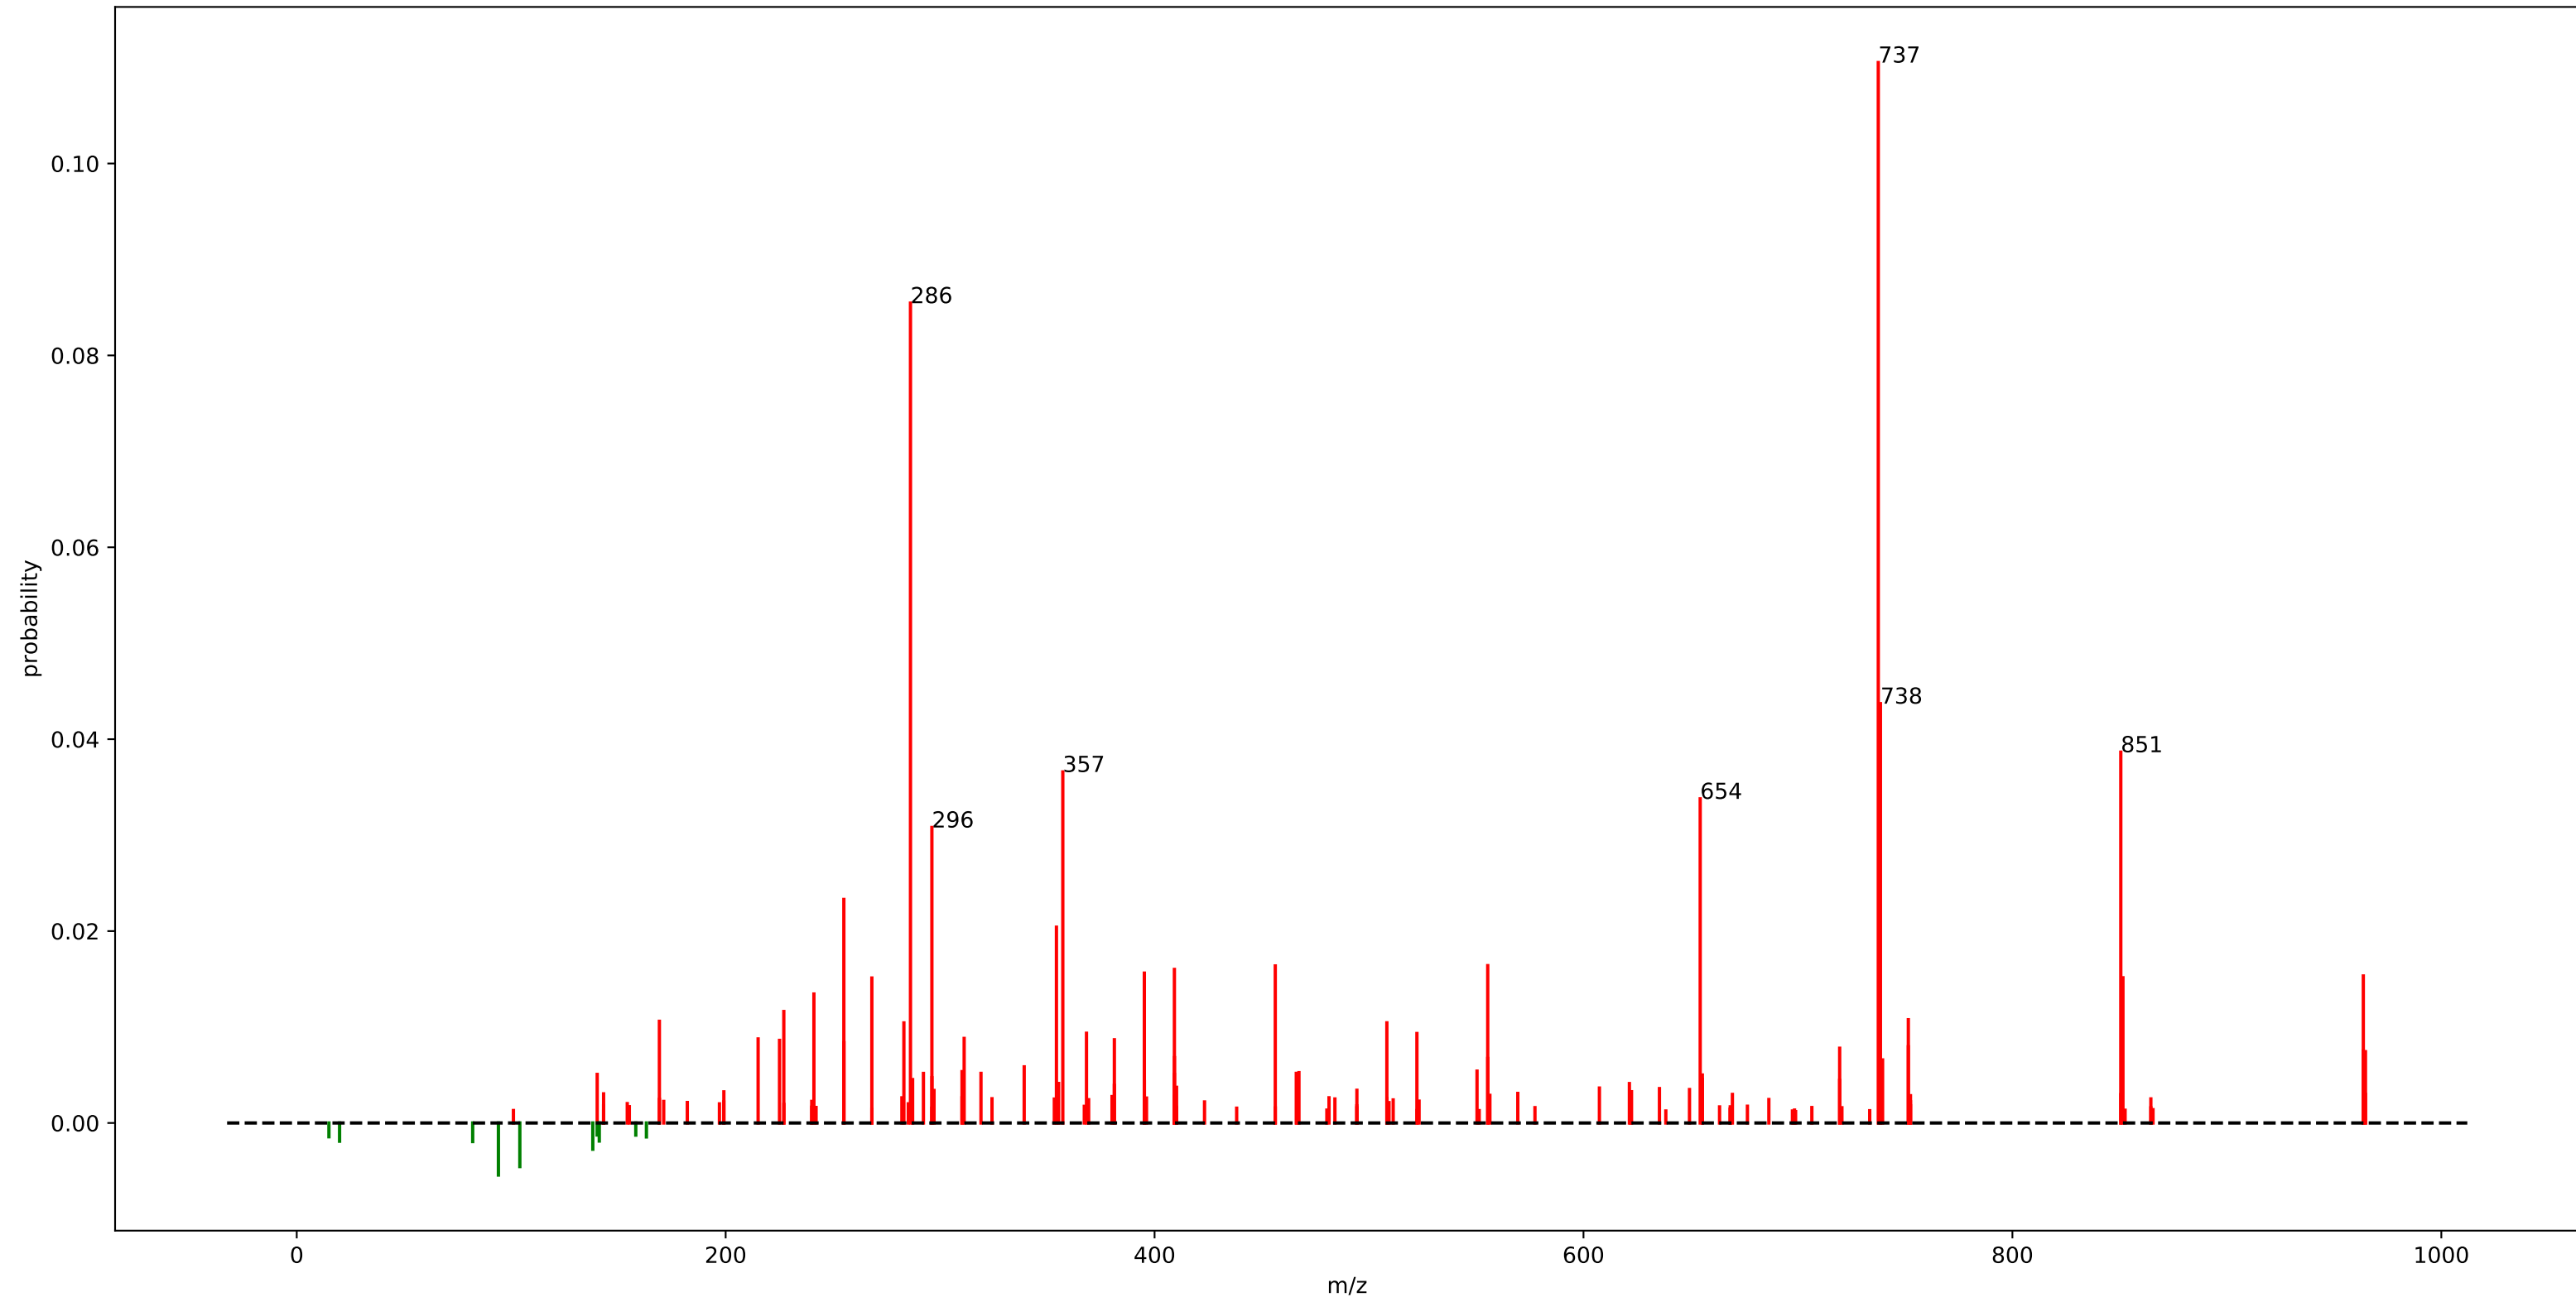

# rhabdus\_motif\_40.m2m

|                   |        |                   |        |                   |        |
|-------------------|--------|-------------------|--------|-------------------|--------|
| fragment_737.4575 | : 0.11 | fragment_508.3125 | : 0.01 | fragment_467.3225 | : 0.01 |
| fragment_286.1775 | : 0.09 | fragment_283.1075 | : 0.01 | fragment_466.0775 | : 0.01 |
| fragment_738.4575 | : 0.04 | fragment_368.2525 | : 0.01 | fragment_319.0525 | : 0.01 |
| fragment_850.5375 | : 0.04 | fragment_522.3275 | : 0.01 | fragment_292.2225 | : 0.01 |
| fragment_357.2125 | : 0.04 | fragment_311.2075 | : 0.01 | fragment_140.1025 | : 0.01 |
| fragment_654.4175 | : 0.03 | fragment_215.1375 | : 0.01 | fragment_409.2475 | : 0.01 |
| fragment_296.1625 | : 0.03 | fragment_381.2475 | : 0.01 |                   |        |
| fragment_255.1125 | : 0.02 | fragment_225.1225 | : 0.01 |                   |        |
| fragment_354.2375 | : 0.02 | fragment_255.1675 | : 0.01 |                   |        |
| fragment_555.3475 | : 0.02 | fragment_751.4725 | : 0.01 |                   |        |
| fragment_456.2825 | : 0.02 | fragment_719.4475 | : 0.01 |                   |        |
| fragment_409.2425 | : 0.02 | fragment_963.6175 | : 0.01 |                   |        |
| fragment_395.2275 | : 0.02 | fragment_964.6225 | : 0.01 |                   |        |
| fragment_963.6225 | : 0.02 | fragment_409.2775 | : 0.01 |                   |        |
| fragment_851.5425 | : 0.02 | fragment_555.3525 | : 0.01 |                   |        |
| fragment_268.1675 | : 0.02 | fragment_739.4625 | : 0.01 |                   |        |
| fragment_241.1525 | : 0.01 | fragment_339.2025 | : 0.01 |                   |        |
| fragment_227.1175 | : 0.01 | loss_94.0425      | : 0.01 |                   |        |
| fragment_751.4675 | : 0.01 | fragment_550.3575 | : 0.01 |                   |        |
| fragment_169.0975 | : 0.01 | fragment_310.2125 | : 0.01 |                   |        |

motif\_500

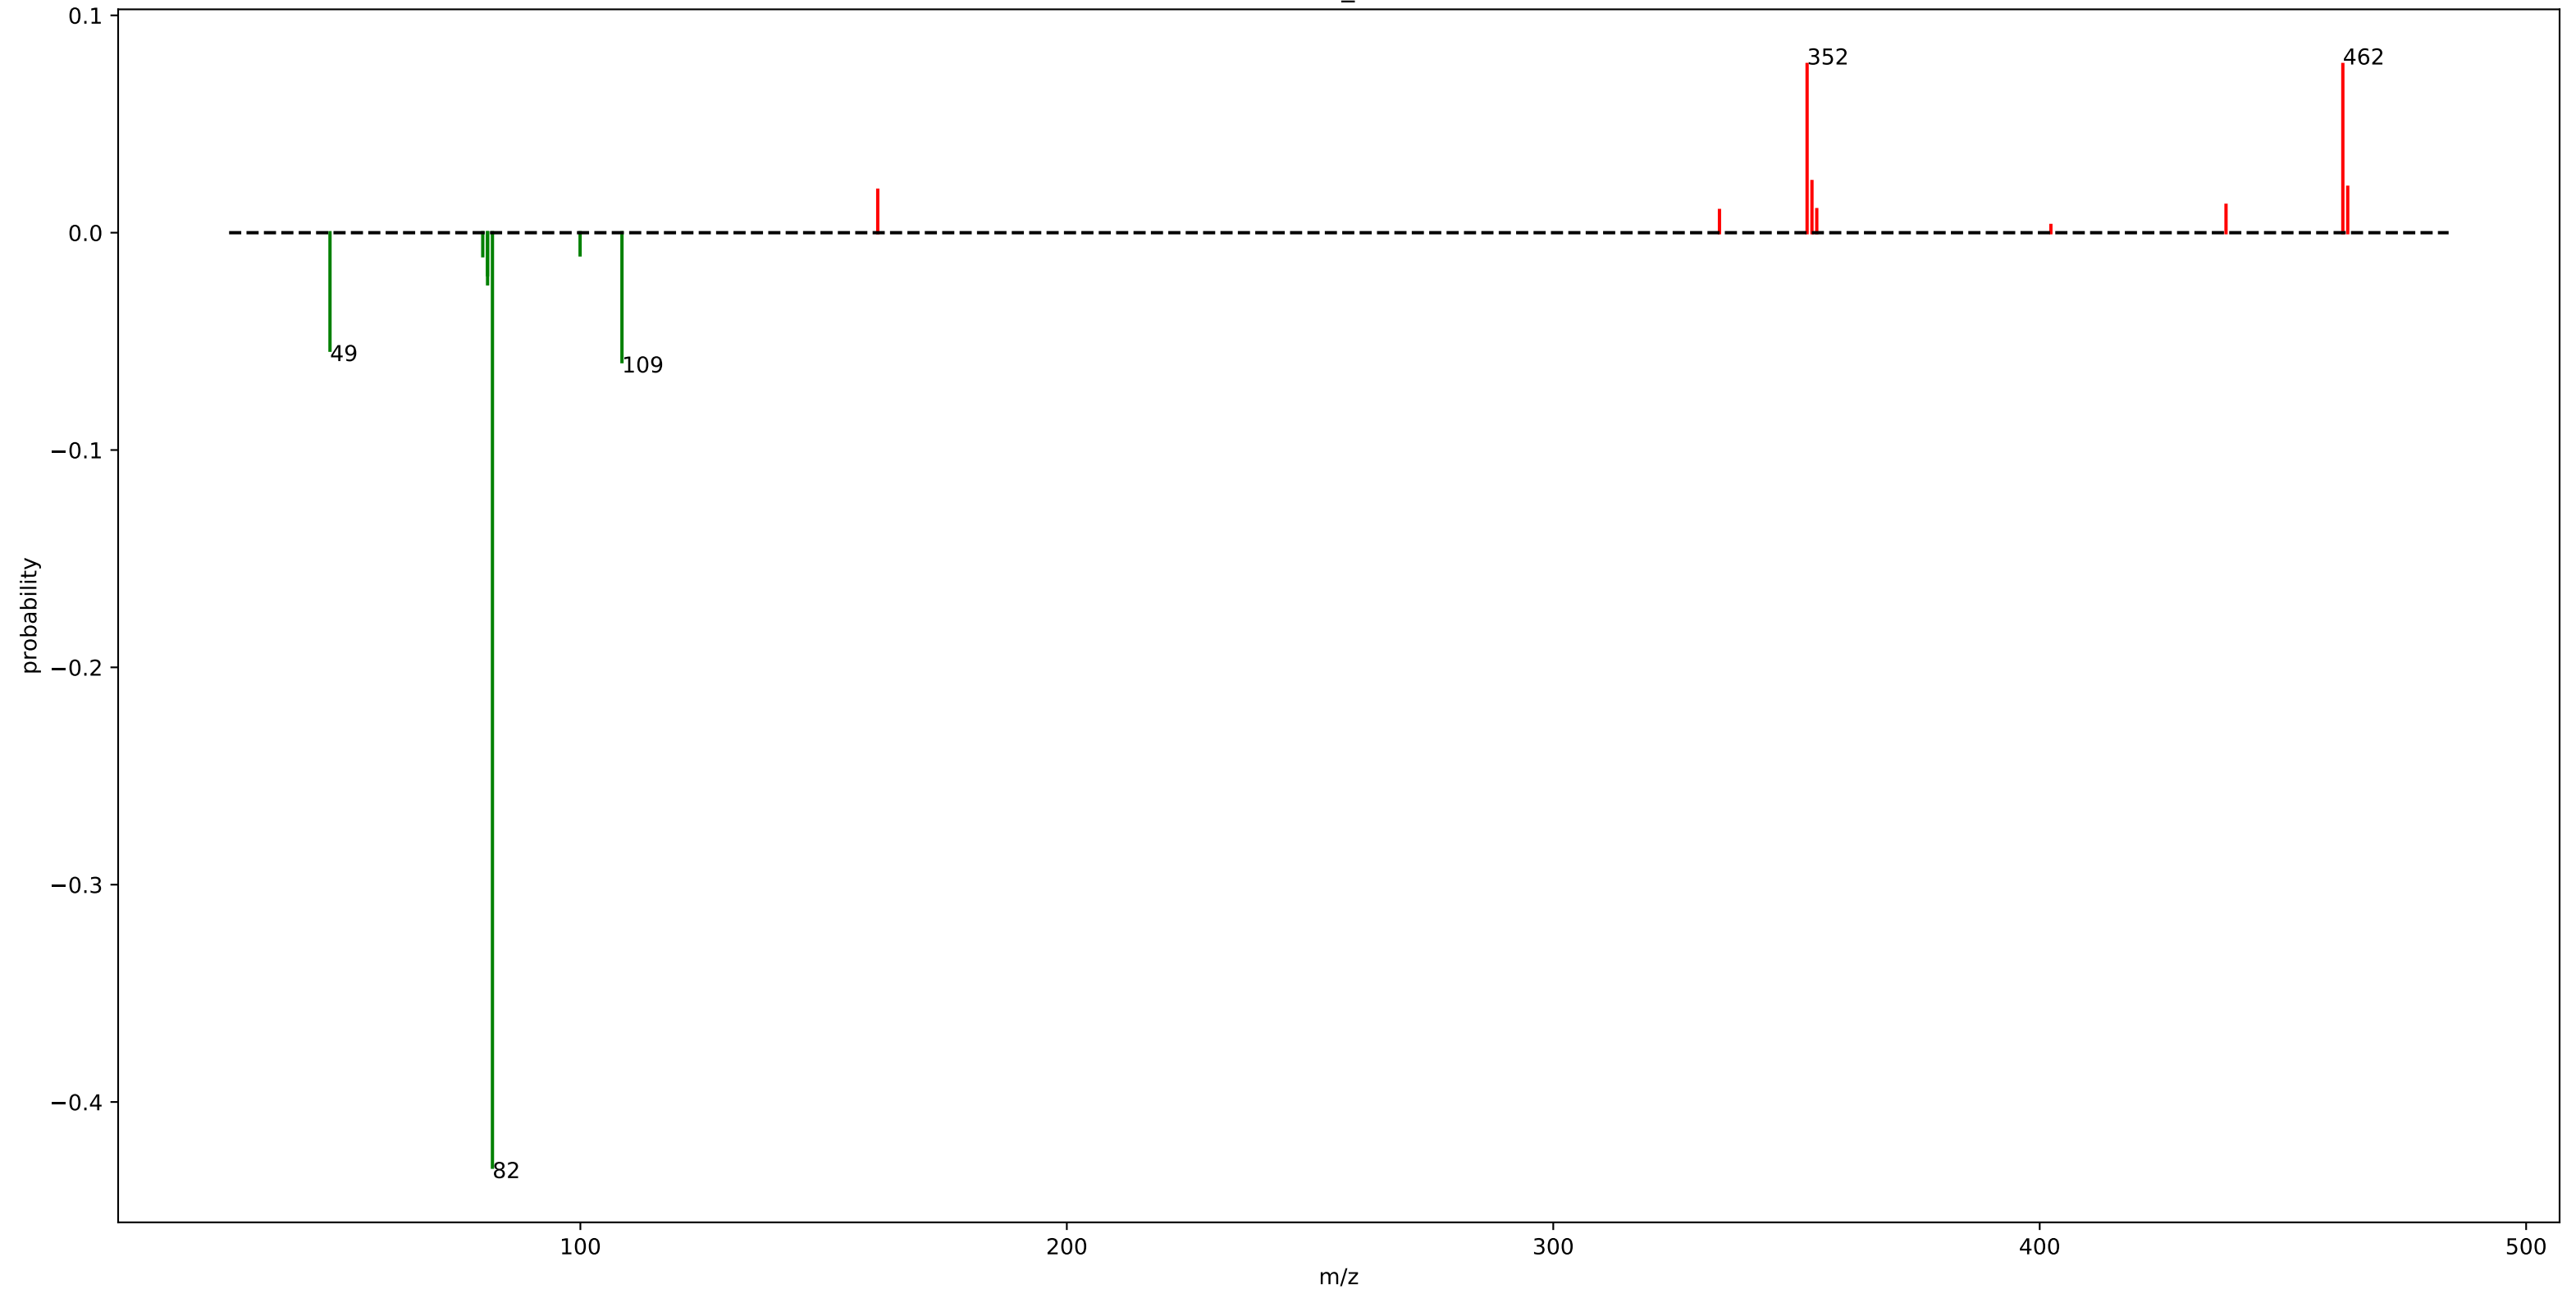

## motif\_500

|                   |        |
|-------------------|--------|
| loss_81.9225      | : 0.43 |
| fragment_352.1825 | : 0.08 |
| fragment_462.3175 | : 0.08 |
| loss_108.5475     | : 0.06 |
| loss_48.5275      | : 0.05 |
| loss_80.9225      | : 0.02 |
| fragment_353.1825 | : 0.02 |
| fragment_463.3225 | : 0.02 |
| fragment_161.1325 | : 0.02 |
| loss_80.9175      | : 0.02 |
| fragment_438.3025 | : 0.01 |
| fragment_354.1725 | : 0.01 |
| loss_79.9325      | : 0.01 |
| loss_99.9425      | : 0.01 |
| fragment_334.1675 | : 0.01 |

motif\_501

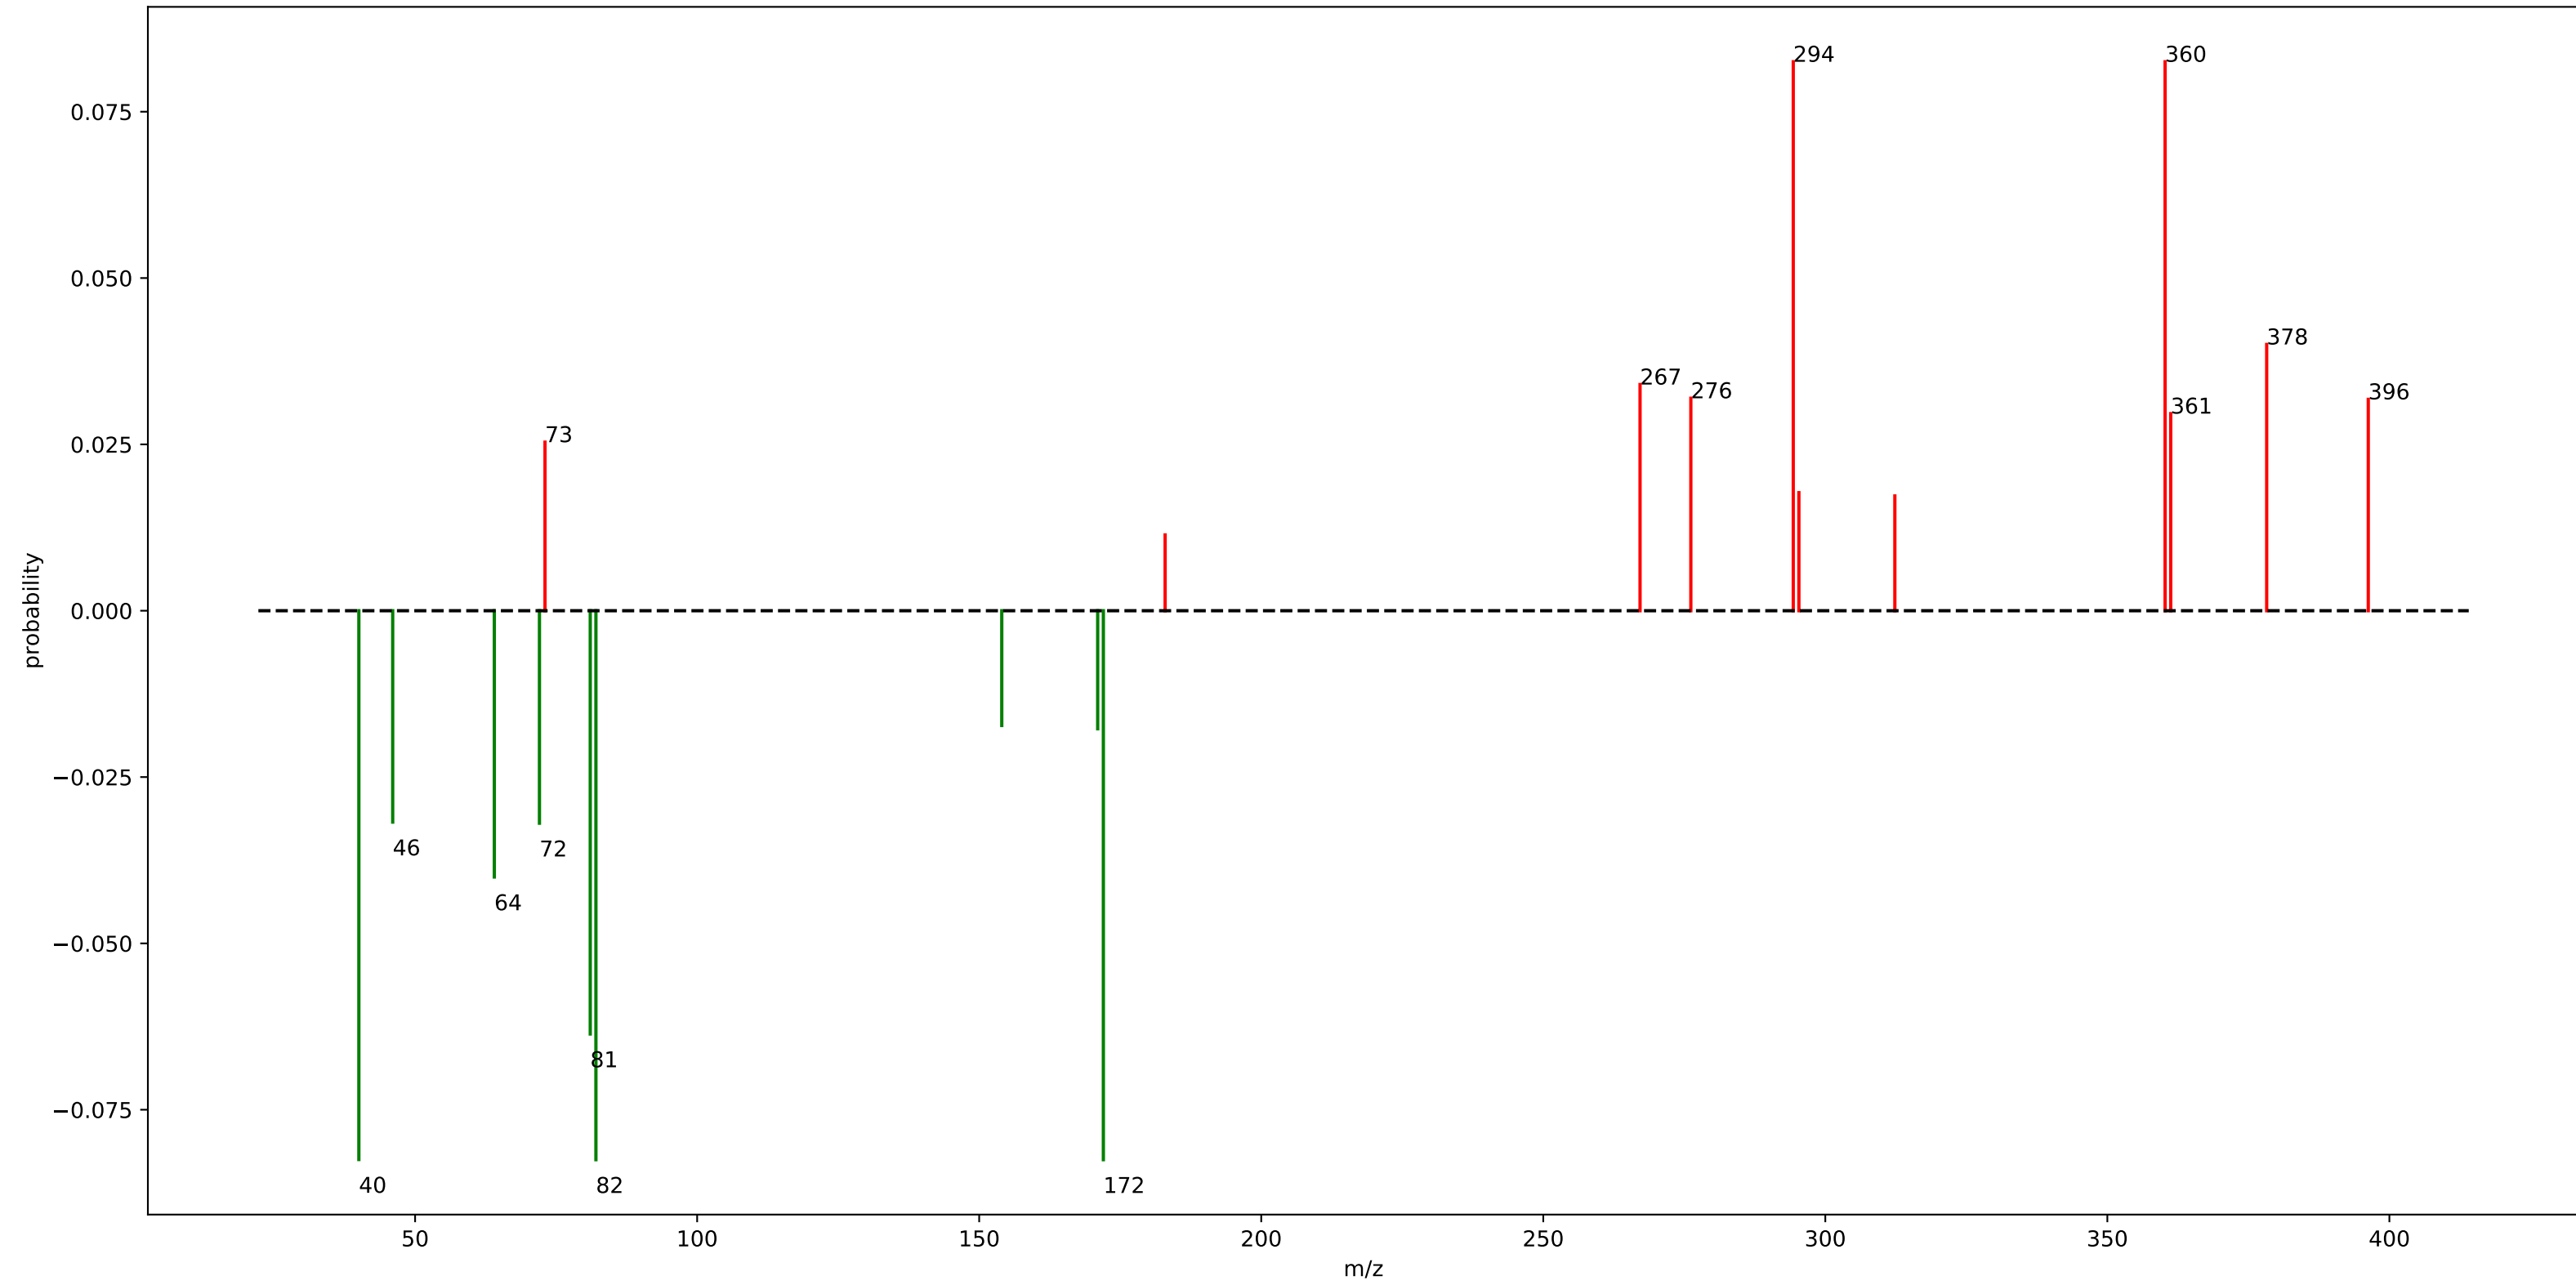

## motif\_501

|                   |        |
|-------------------|--------|
| fragment_294.3175 | : 0.08 |
| loss_172.0125     | : 0.08 |
| fragment_360.2375 | : 0.08 |
| loss_82.0525      | : 0.08 |
| loss_40.0275      | : 0.08 |
| loss_81.0475      | : 0.06 |
| fragment_378.2475 | : 0.04 |
| loss_64.0425      | : 0.04 |
| fragment_267.1575 | : 0.03 |
| loss_72.0425      | : 0.03 |
| fragment_276.1625 | : 0.03 |
| loss_46.0275      | : 0.03 |
| fragment_396.2575 | : 0.03 |
| fragment_361.2375 | : 0.03 |
| fragment_73.0275  | : 0.03 |
| loss_171.0075     | : 0.02 |
| fragment_295.3175 | : 0.02 |
| fragment_312.3275 | : 0.02 |
| loss_154.0025     | : 0.02 |
| fragment_182.9625 | : 0.01 |

motif\_502

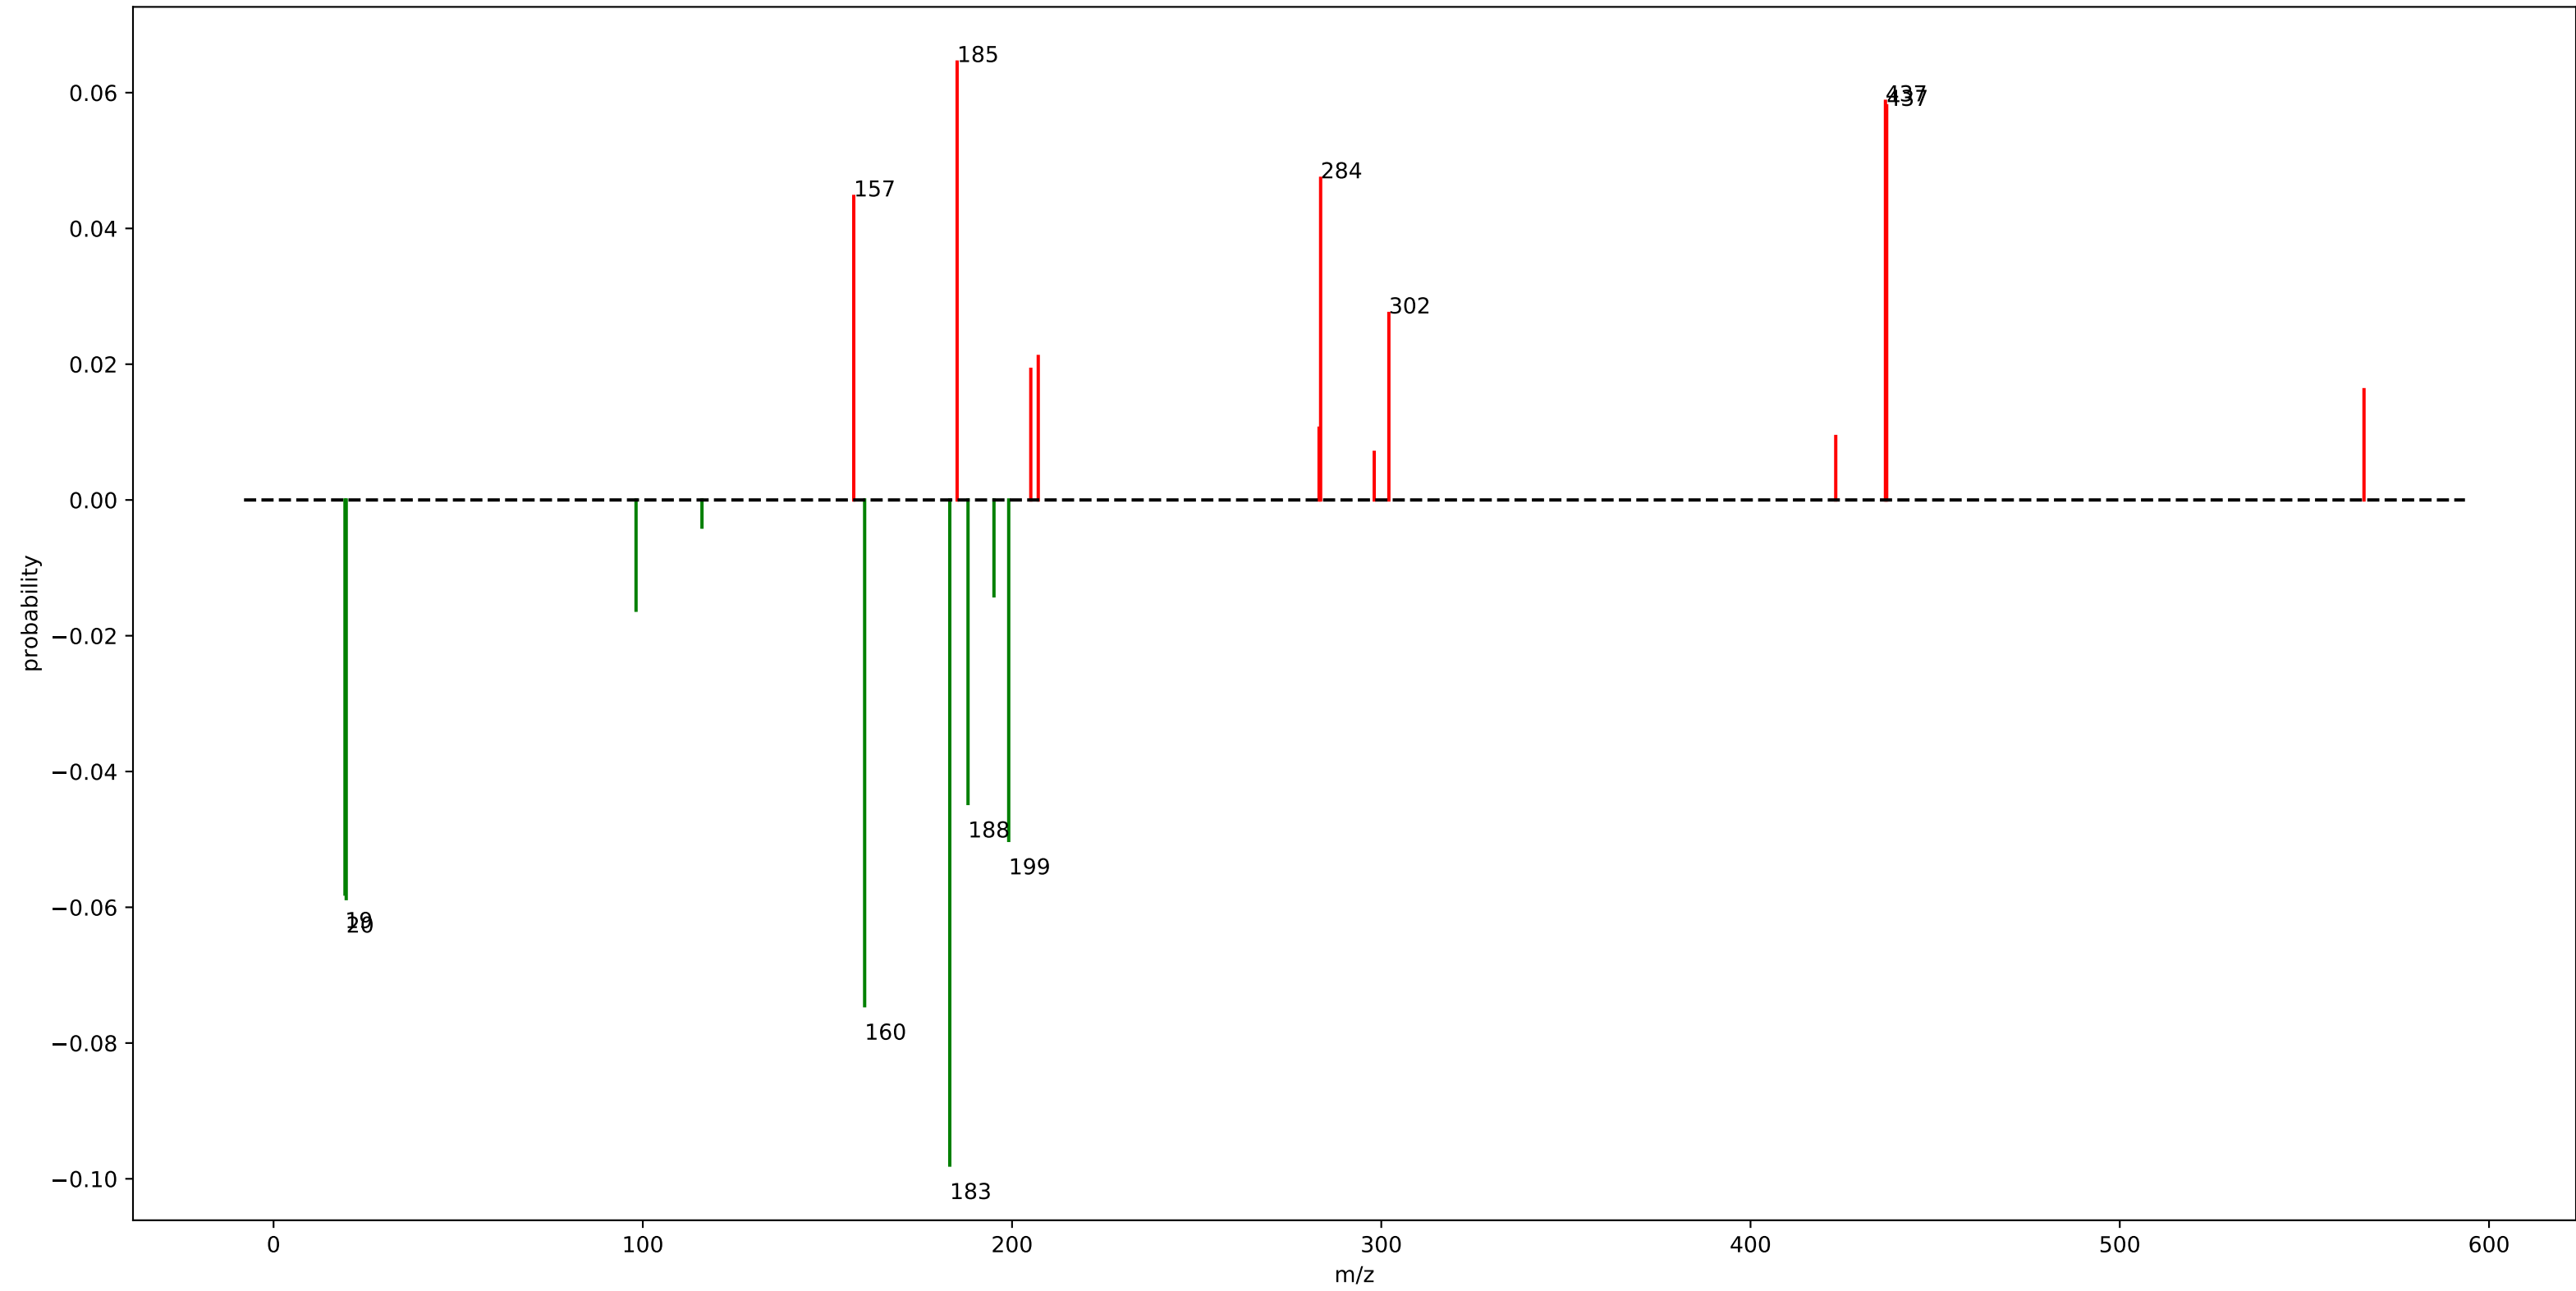

## motif\_502

|                   |        |
|-------------------|--------|
| loss_183.1375     | : 0.10 |
| loss_160.0825     | : 0.07 |
| fragment_185.1275 | : 0.06 |
| loss_19.6775      | : 0.06 |
| fragment_436.5375 | : 0.06 |
| fragment_436.8725 | : 0.06 |
| loss_19.3425      | : 0.06 |
| loss_199.0975     | : 0.05 |
| fragment_283.5725 | : 0.05 |
| loss_188.0775     | : 0.04 |
| fragment_157.1325 | : 0.04 |
| fragment_302.0525 | : 0.03 |
| fragment_207.0975 | : 0.02 |
| fragment_205.0775 | : 0.02 |
| loss_98.1675      | : 0.02 |
| fragment_566.1425 | : 0.02 |
| loss_195.1025     | : 0.01 |
| fragment_283.1475 | : 0.01 |
| fragment_423.0775 | : 0.01 |
| fragment_298.0875 | : 0.01 |



motif\_503

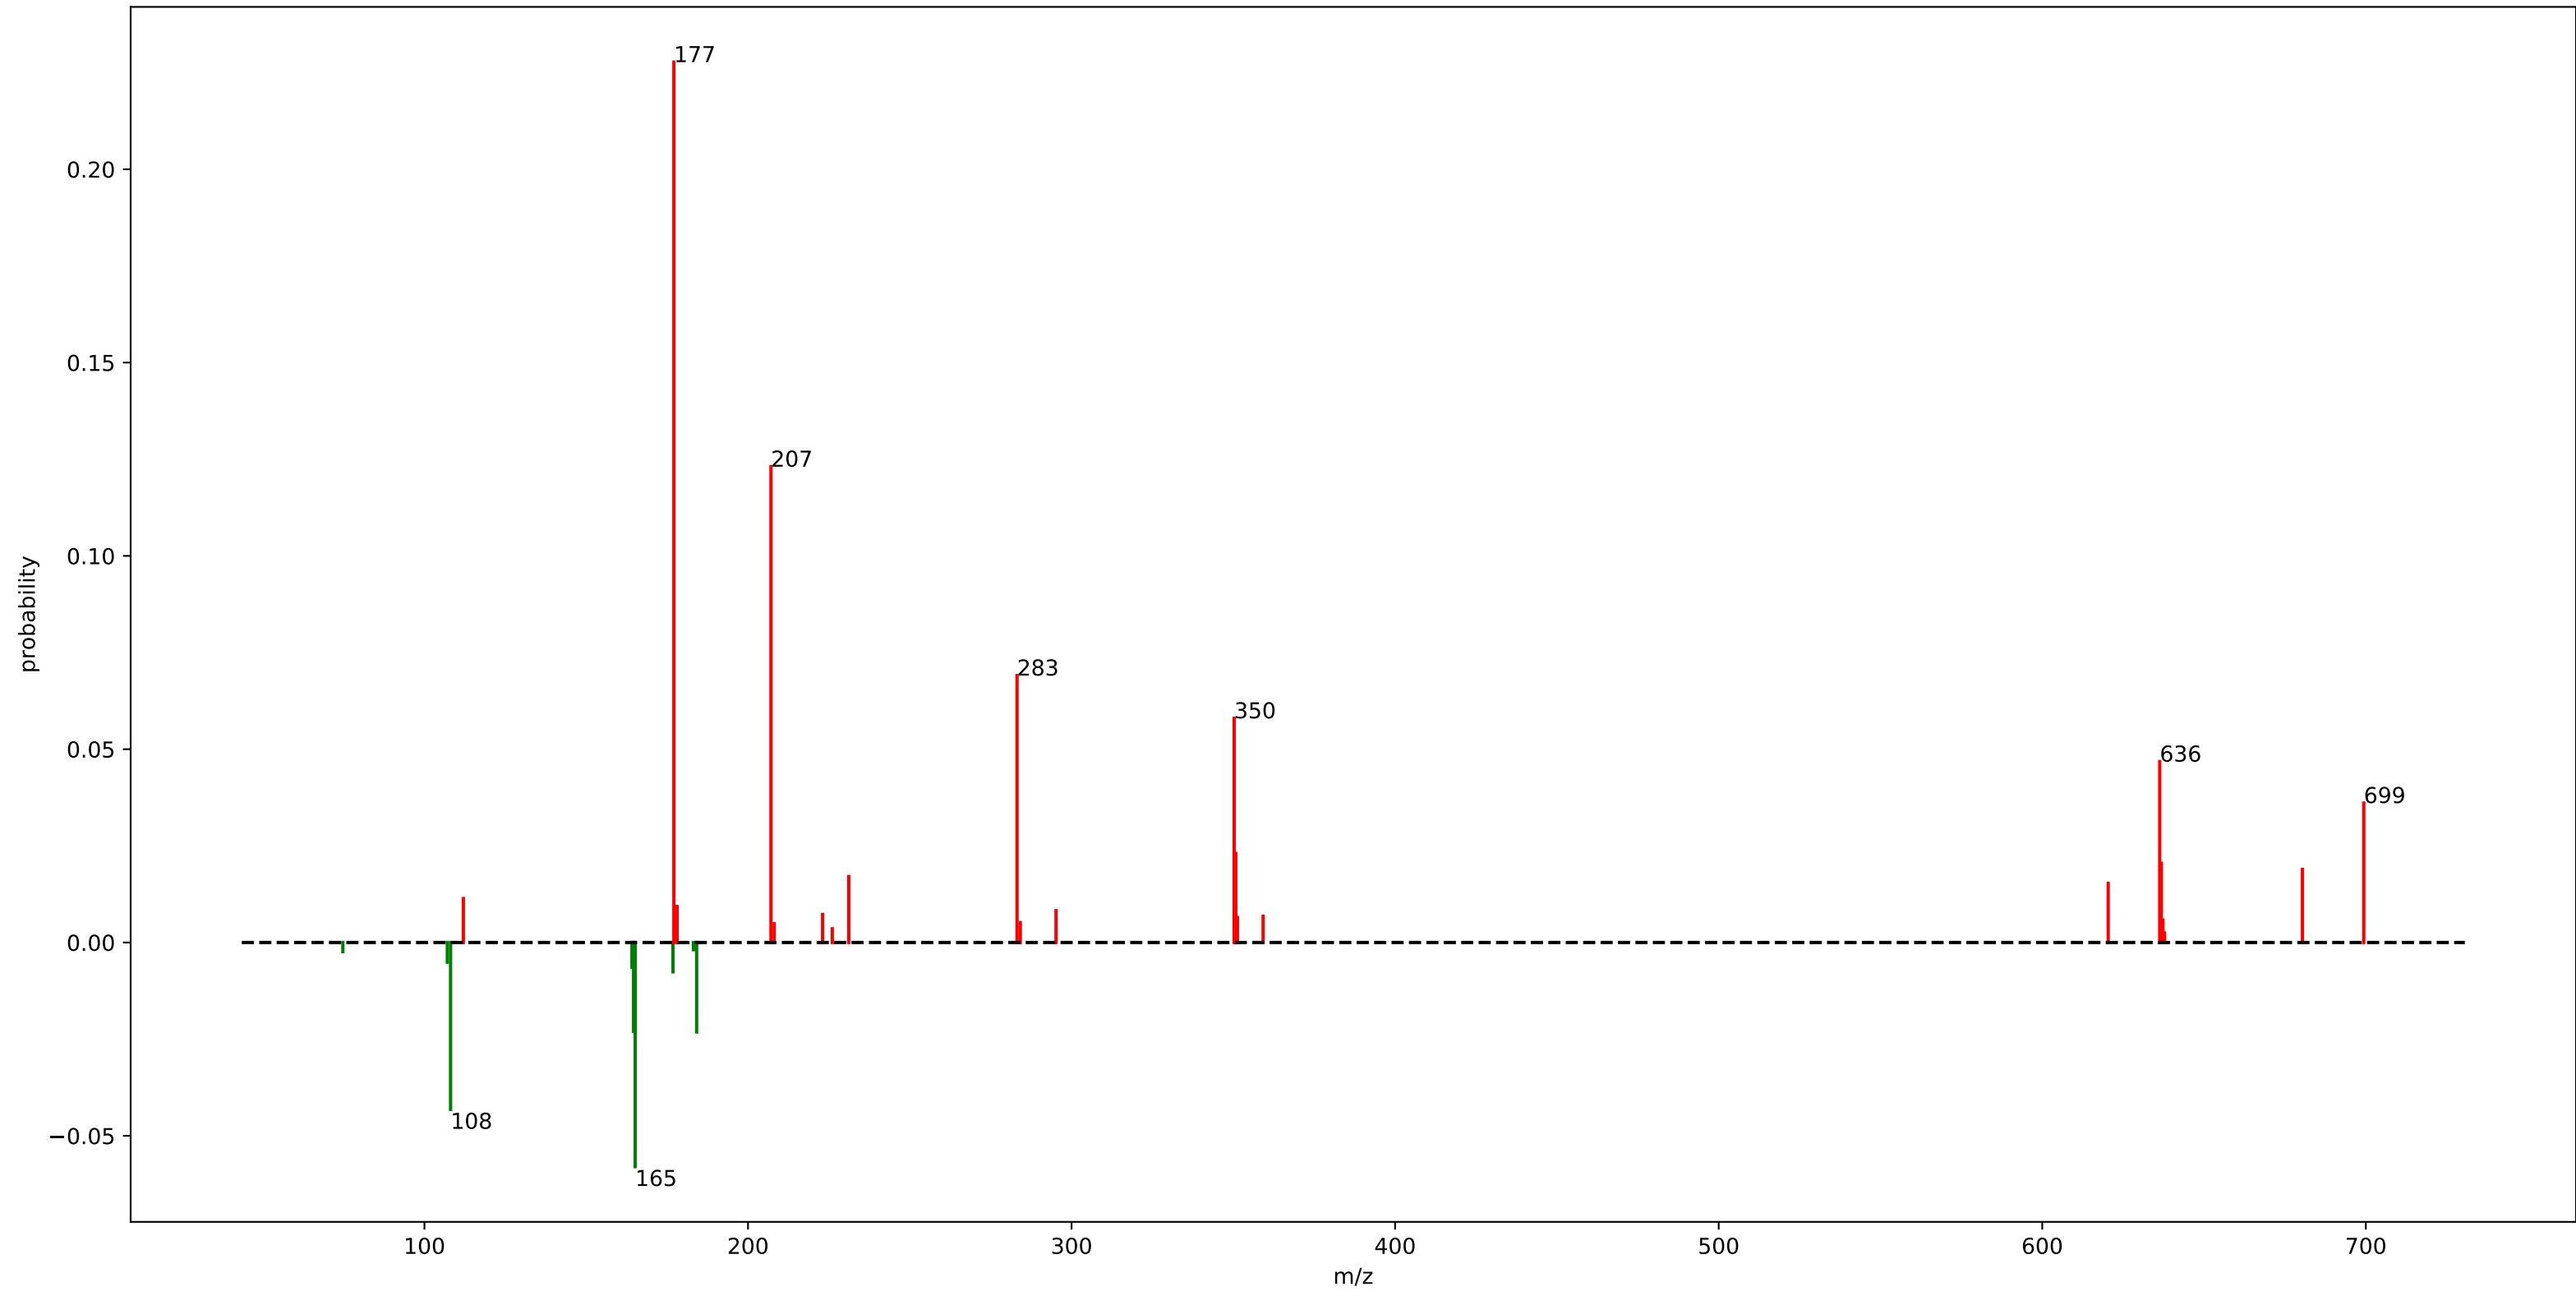

## motif\_503

|                   |        |                   |        |
|-------------------|--------|-------------------|--------|
| fragment_177.0875 | : 0.23 | fragment_359.2025 | : 0.01 |
| fragment_207.0975 | : 0.12 | fragment_351.2625 | : 0.01 |
| fragment_283.1525 | : 0.07 | loss_164.1325     | : 0.01 |
| loss_165.1375     | : 0.06 | fragment_637.3075 | : 0.01 |
| fragment_350.2575 | : 0.06 | fragment_284.1525 | : 0.01 |
| fragment_636.3075 | : 0.05 | loss_107.0725     | : 0.01 |
| loss_108.0775     | : 0.04 |                   |        |
| fragment_699.3775 | : 0.04 |                   |        |
| loss_184.1275     | : 0.02 |                   |        |
| loss_164.6325     | : 0.02 |                   |        |
| fragment_350.7575 | : 0.02 |                   |        |
| fragment_636.8075 | : 0.02 |                   |        |
| fragment_680.4075 | : 0.02 |                   |        |
| fragment_231.1425 | : 0.02 |                   |        |
| fragment_620.3825 | : 0.02 |                   |        |
| fragment_112.0275 | : 0.01 |                   |        |
| fragment_178.0875 | : 0.01 |                   |        |
| fragment_295.1925 | : 0.01 |                   |        |
| loss_176.8125     | : 0.01 |                   |        |
| fragment_223.0475 | : 0.01 |                   |        |

motif\_504

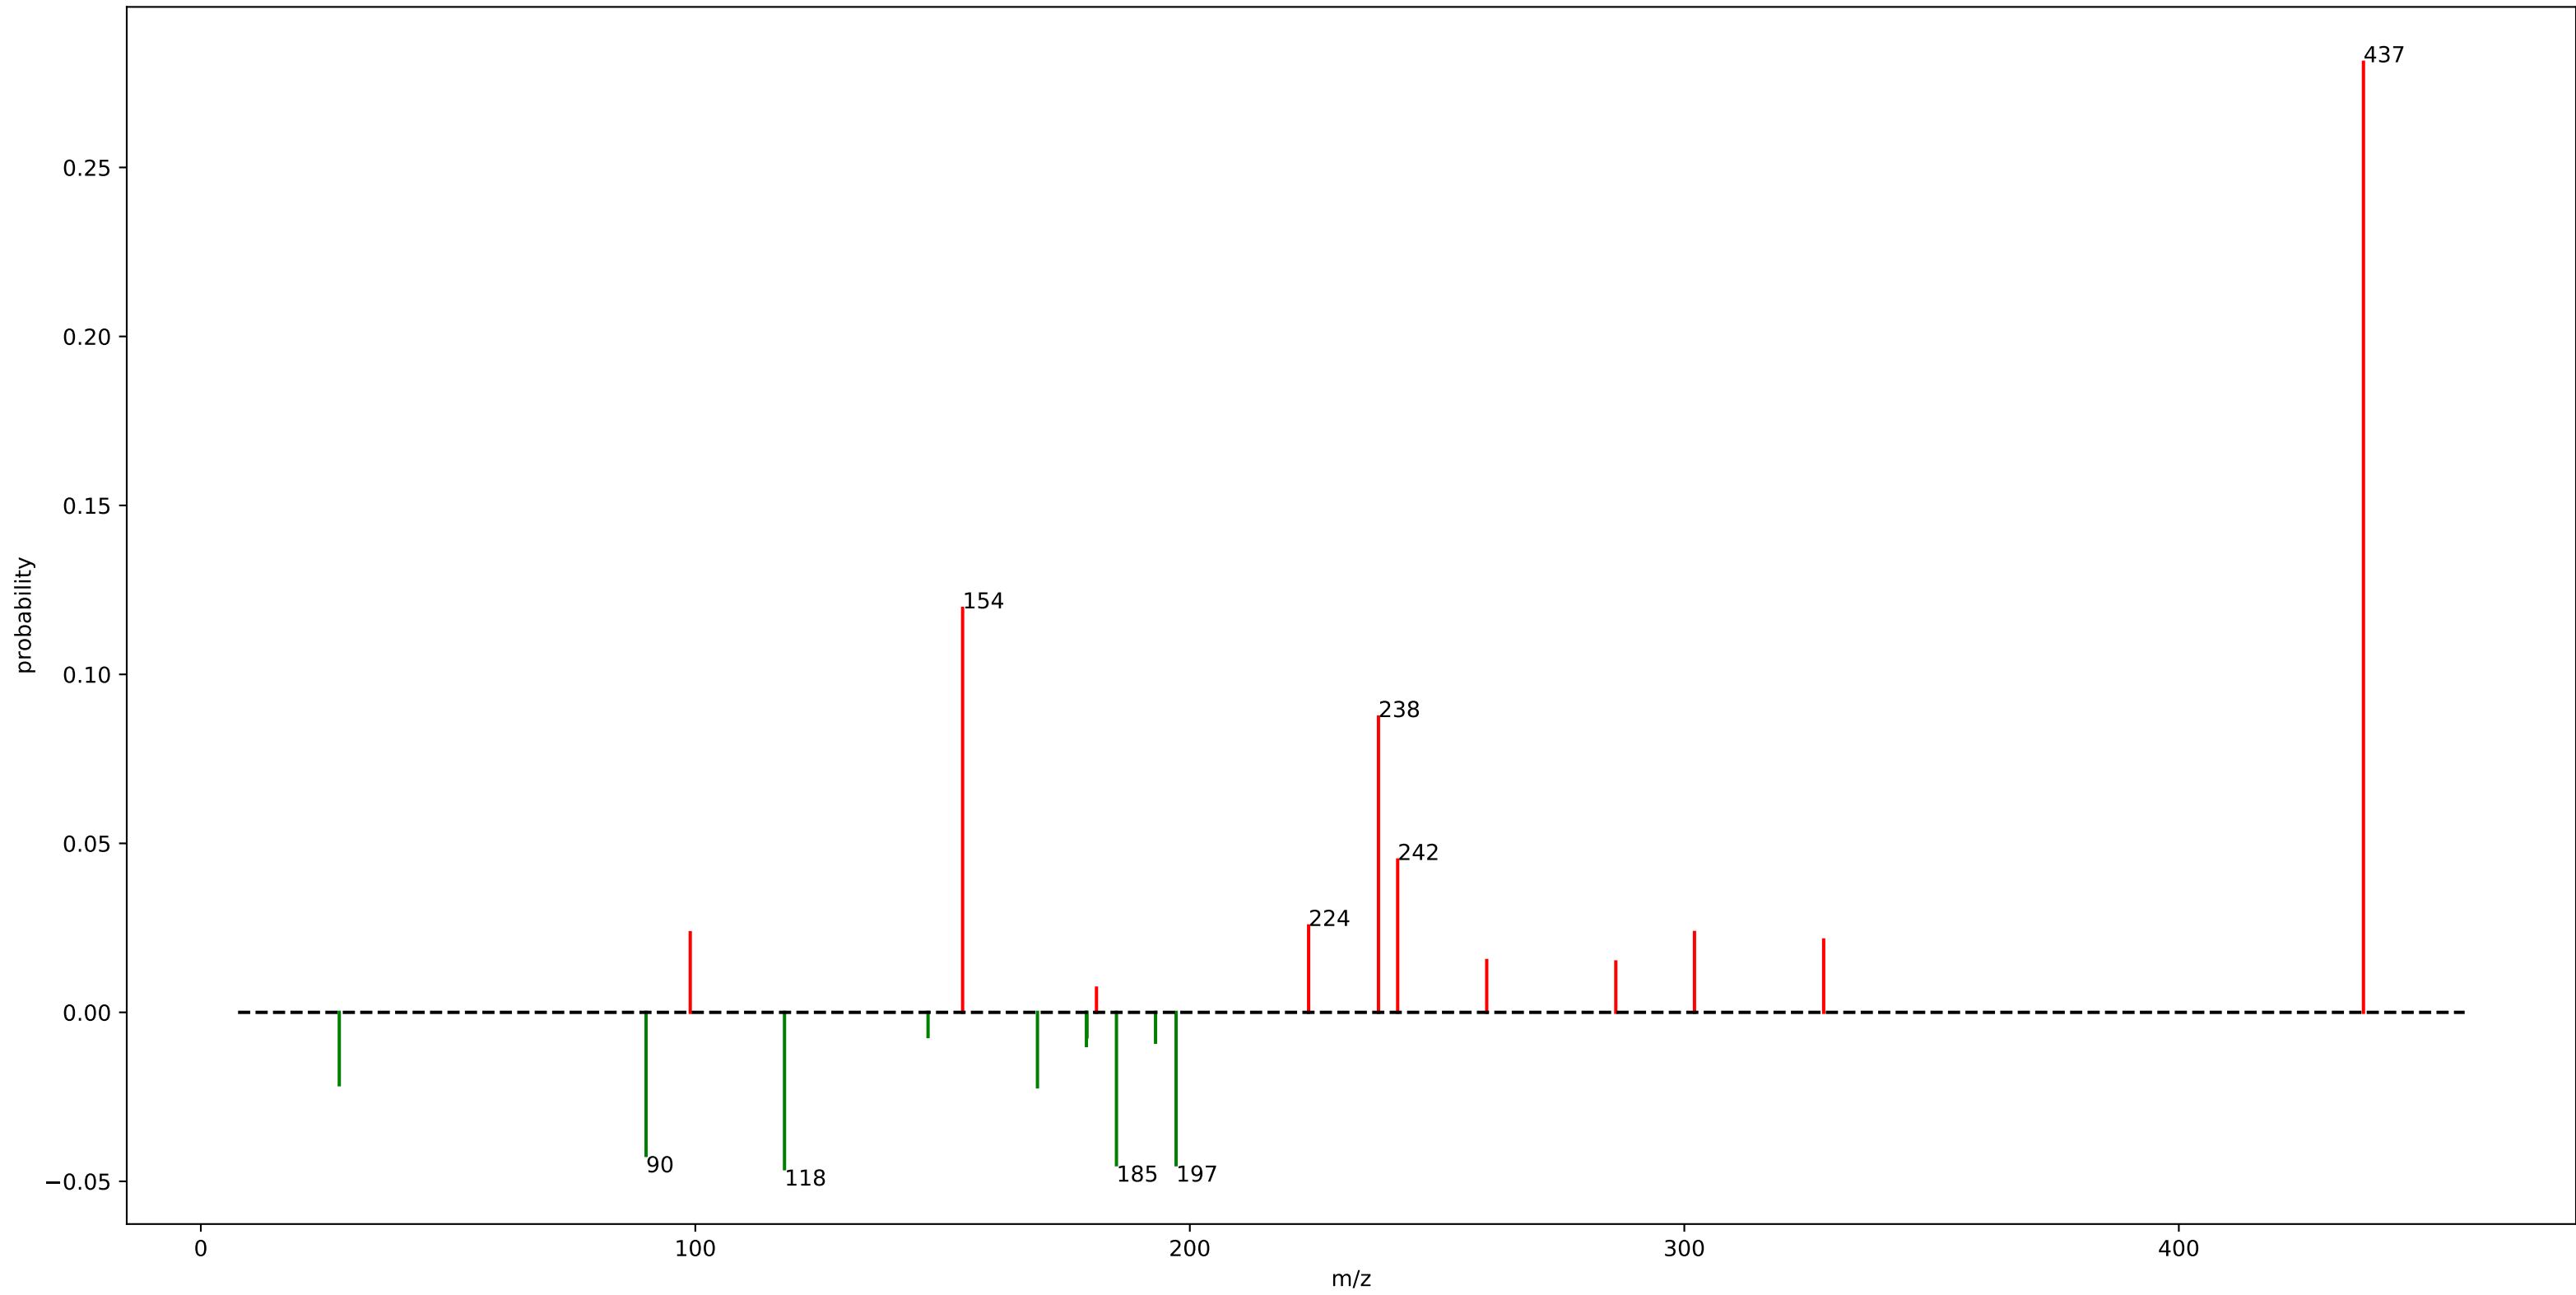

## motif\_504

|                   |        |                   |        |
|-------------------|--------|-------------------|--------|
| fragment_437.3375 | : 0.28 | fragment_181.1225 | : 0.01 |
| fragment_154.0525 | : 0.12 |                   |        |
| fragment_238.1475 | : 0.09 |                   |        |
| loss_118.0325     | : 0.05 |                   |        |
| fragment_242.0325 | : 0.05 |                   |        |
| loss_185.1625     | : 0.05 |                   |        |
| loss_197.2225     | : 0.05 |                   |        |
| loss_90.0375      | : 0.04 |                   |        |
| fragment_224.0225 | : 0.03 |                   |        |
| fragment_302.0525 | : 0.02 |                   |        |
| fragment_98.9725  | : 0.02 |                   |        |
| loss_169.1875     | : 0.02 |                   |        |
| loss_27.9975      | : 0.02 |                   |        |
| fragment_328.1775 | : 0.02 |                   |        |
| fragment_260.0425 | : 0.02 |                   |        |
| fragment_286.1425 | : 0.01 |                   |        |
| loss_179.0875     | : 0.01 |                   |        |
| loss_193.0675     | : 0.01 |                   |        |
| loss_179.2075     | : 0.01 |                   |        |
| loss_147.0625     | : 0.01 |                   |        |

StrepSalini\_motif\_221.m2m

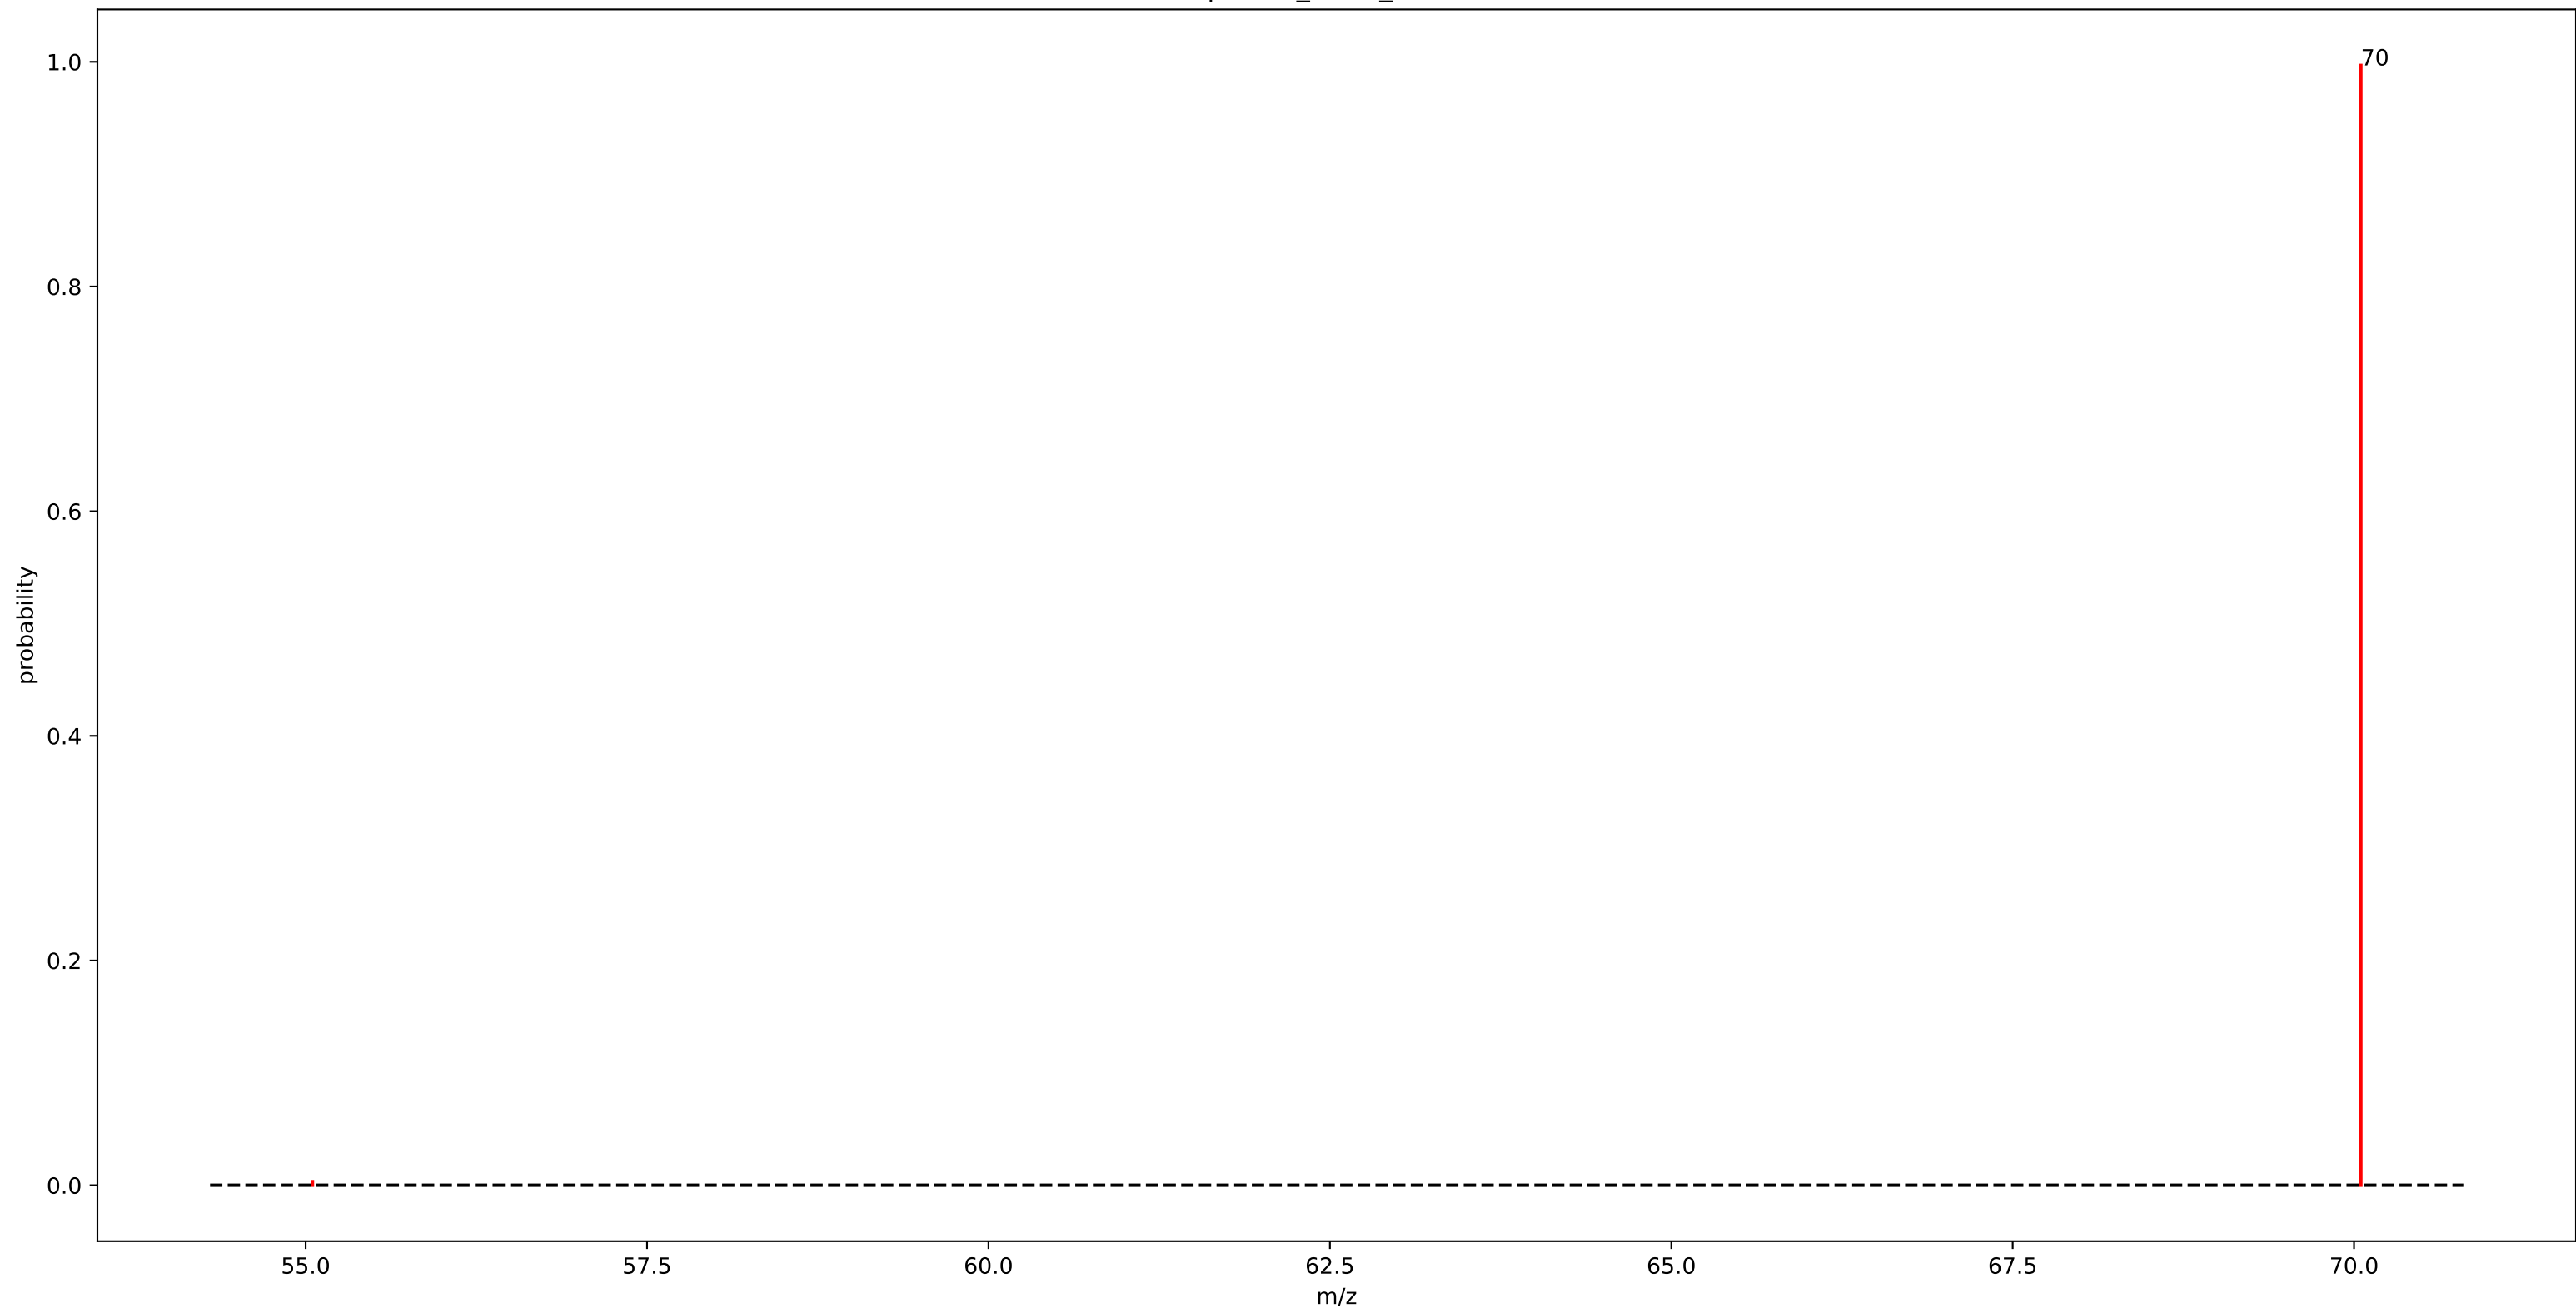

# StrepSalini\_motif\_221.m2m

fragment\_70.0500 : 1.00

motif\_506

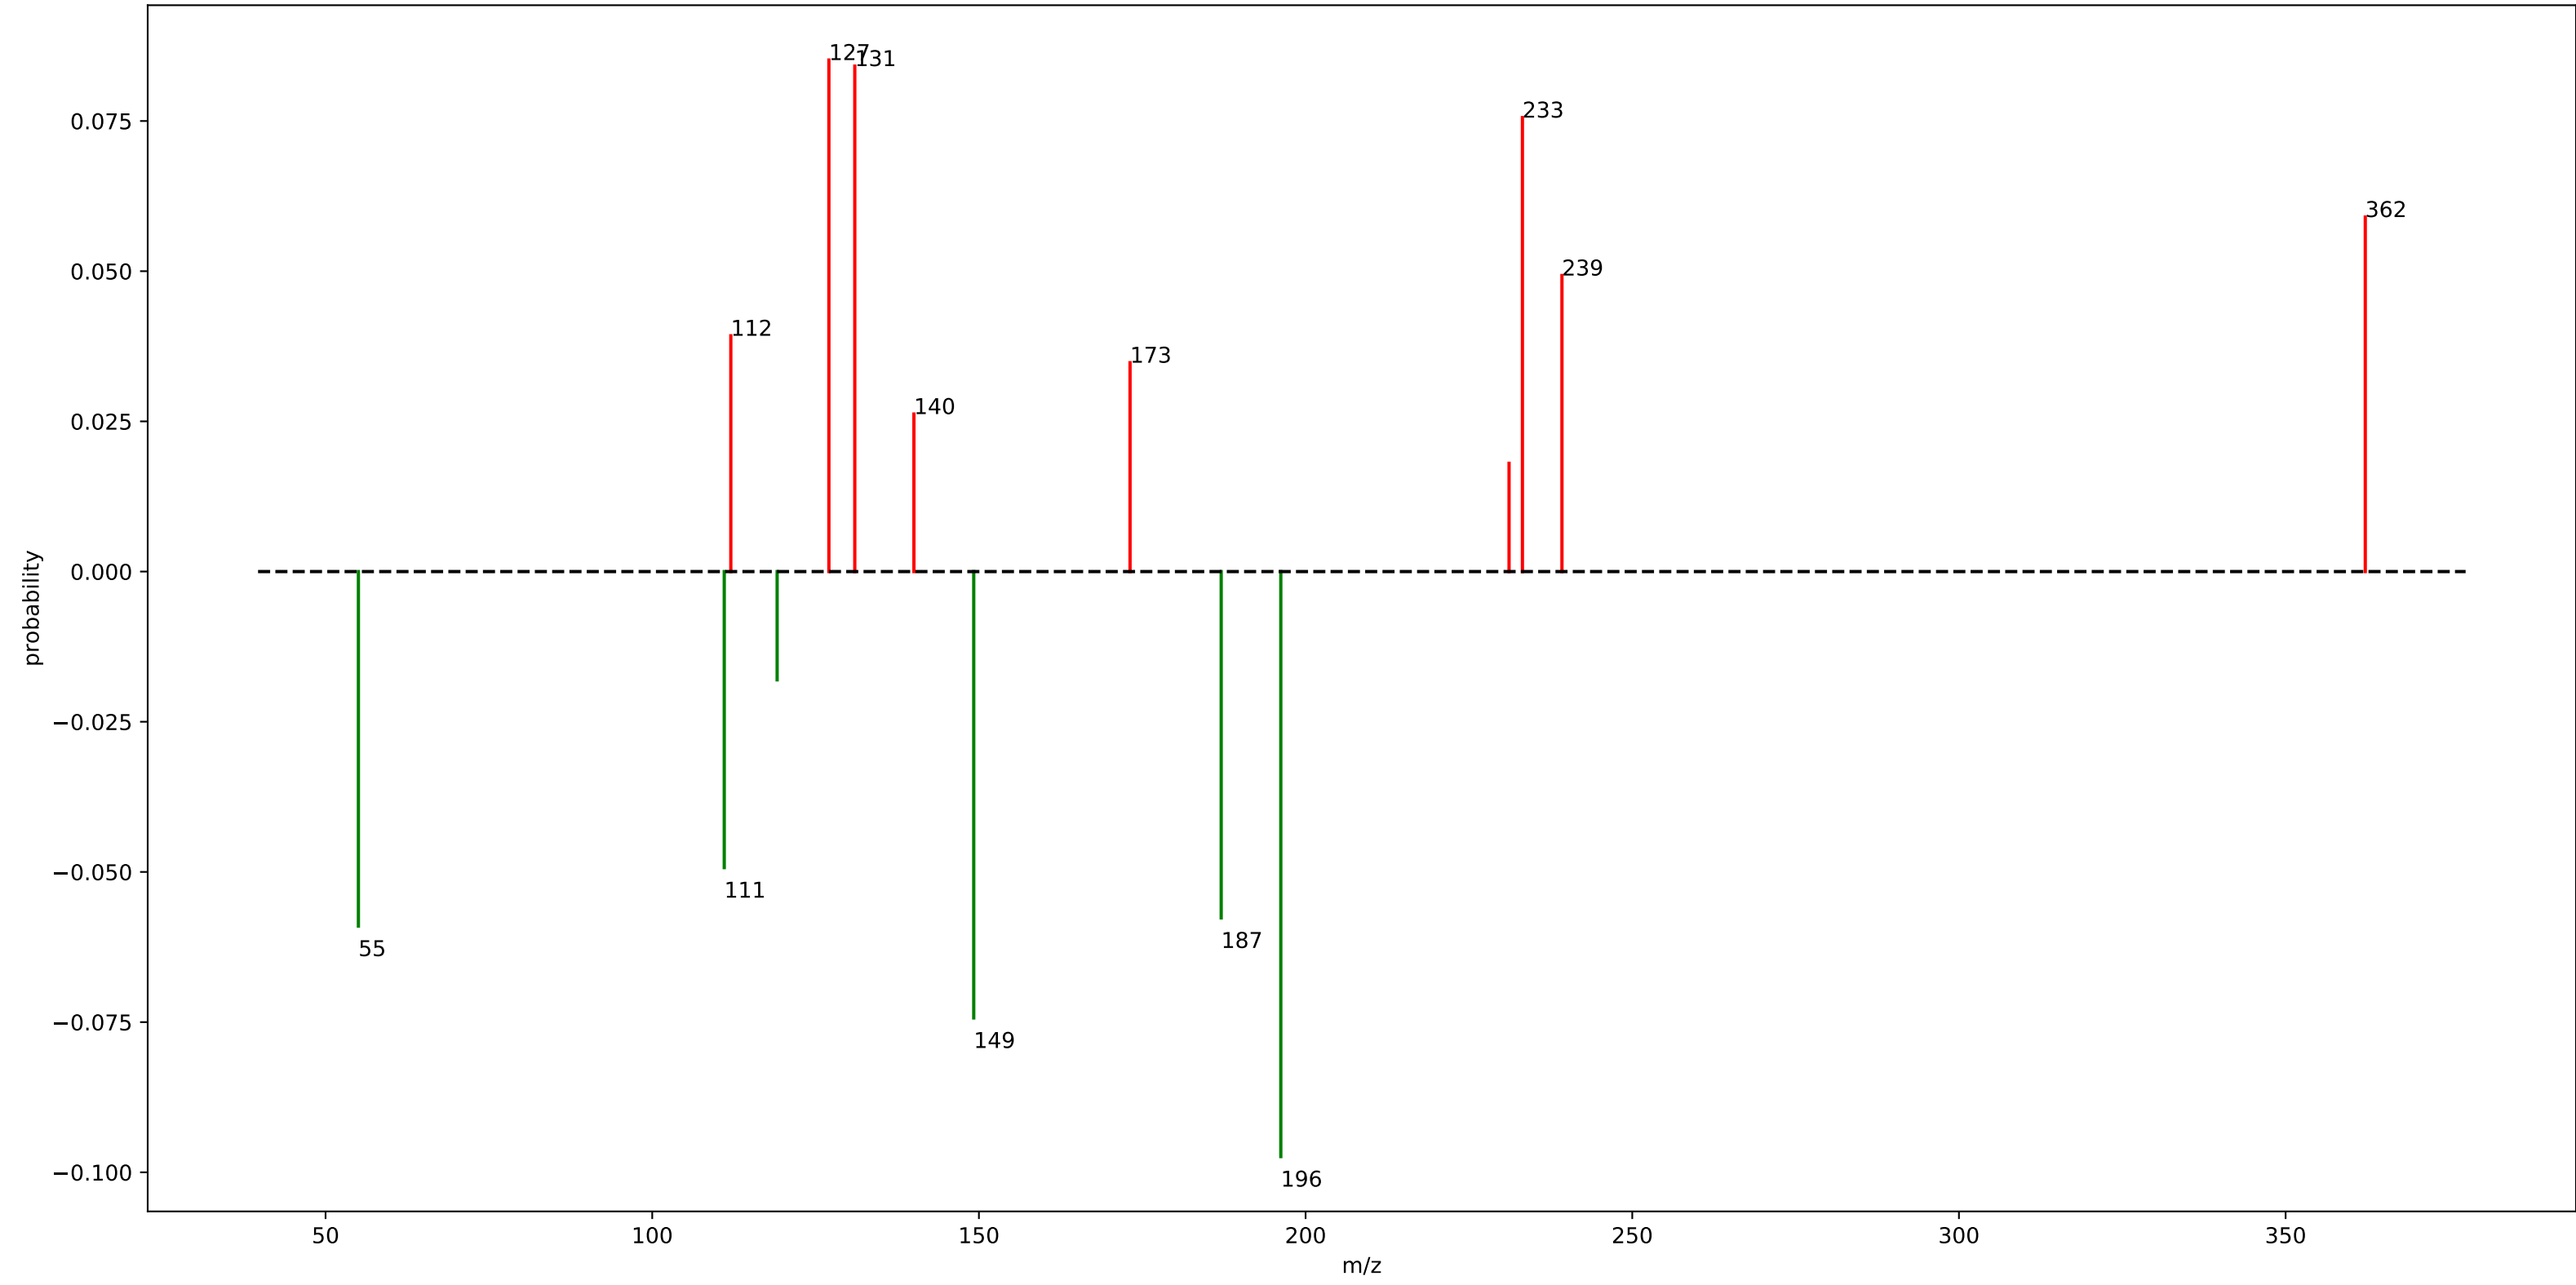

## motif\_506

|                   |        |
|-------------------|--------|
| loss_196.2075     | : 0.10 |
| fragment_127.0375 | : 0.09 |
| fragment_131.0025 | : 0.08 |
| fragment_233.1875 | : 0.08 |
| loss_149.2075     | : 0.07 |
| loss_55.0275      | : 0.06 |
| fragment_362.1925 | : 0.06 |
| loss_187.0825     | : 0.06 |
| fragment_239.2375 | : 0.05 |
| loss_111.0225     | : 0.05 |
| fragment_112.0275 | : 0.04 |
| fragment_173.1325 | : 0.03 |
| fragment_140.0525 | : 0.03 |
| loss_119.1175     | : 0.02 |
| fragment_231.1425 | : 0.02 |



rhamn\_motif\_140.m2m

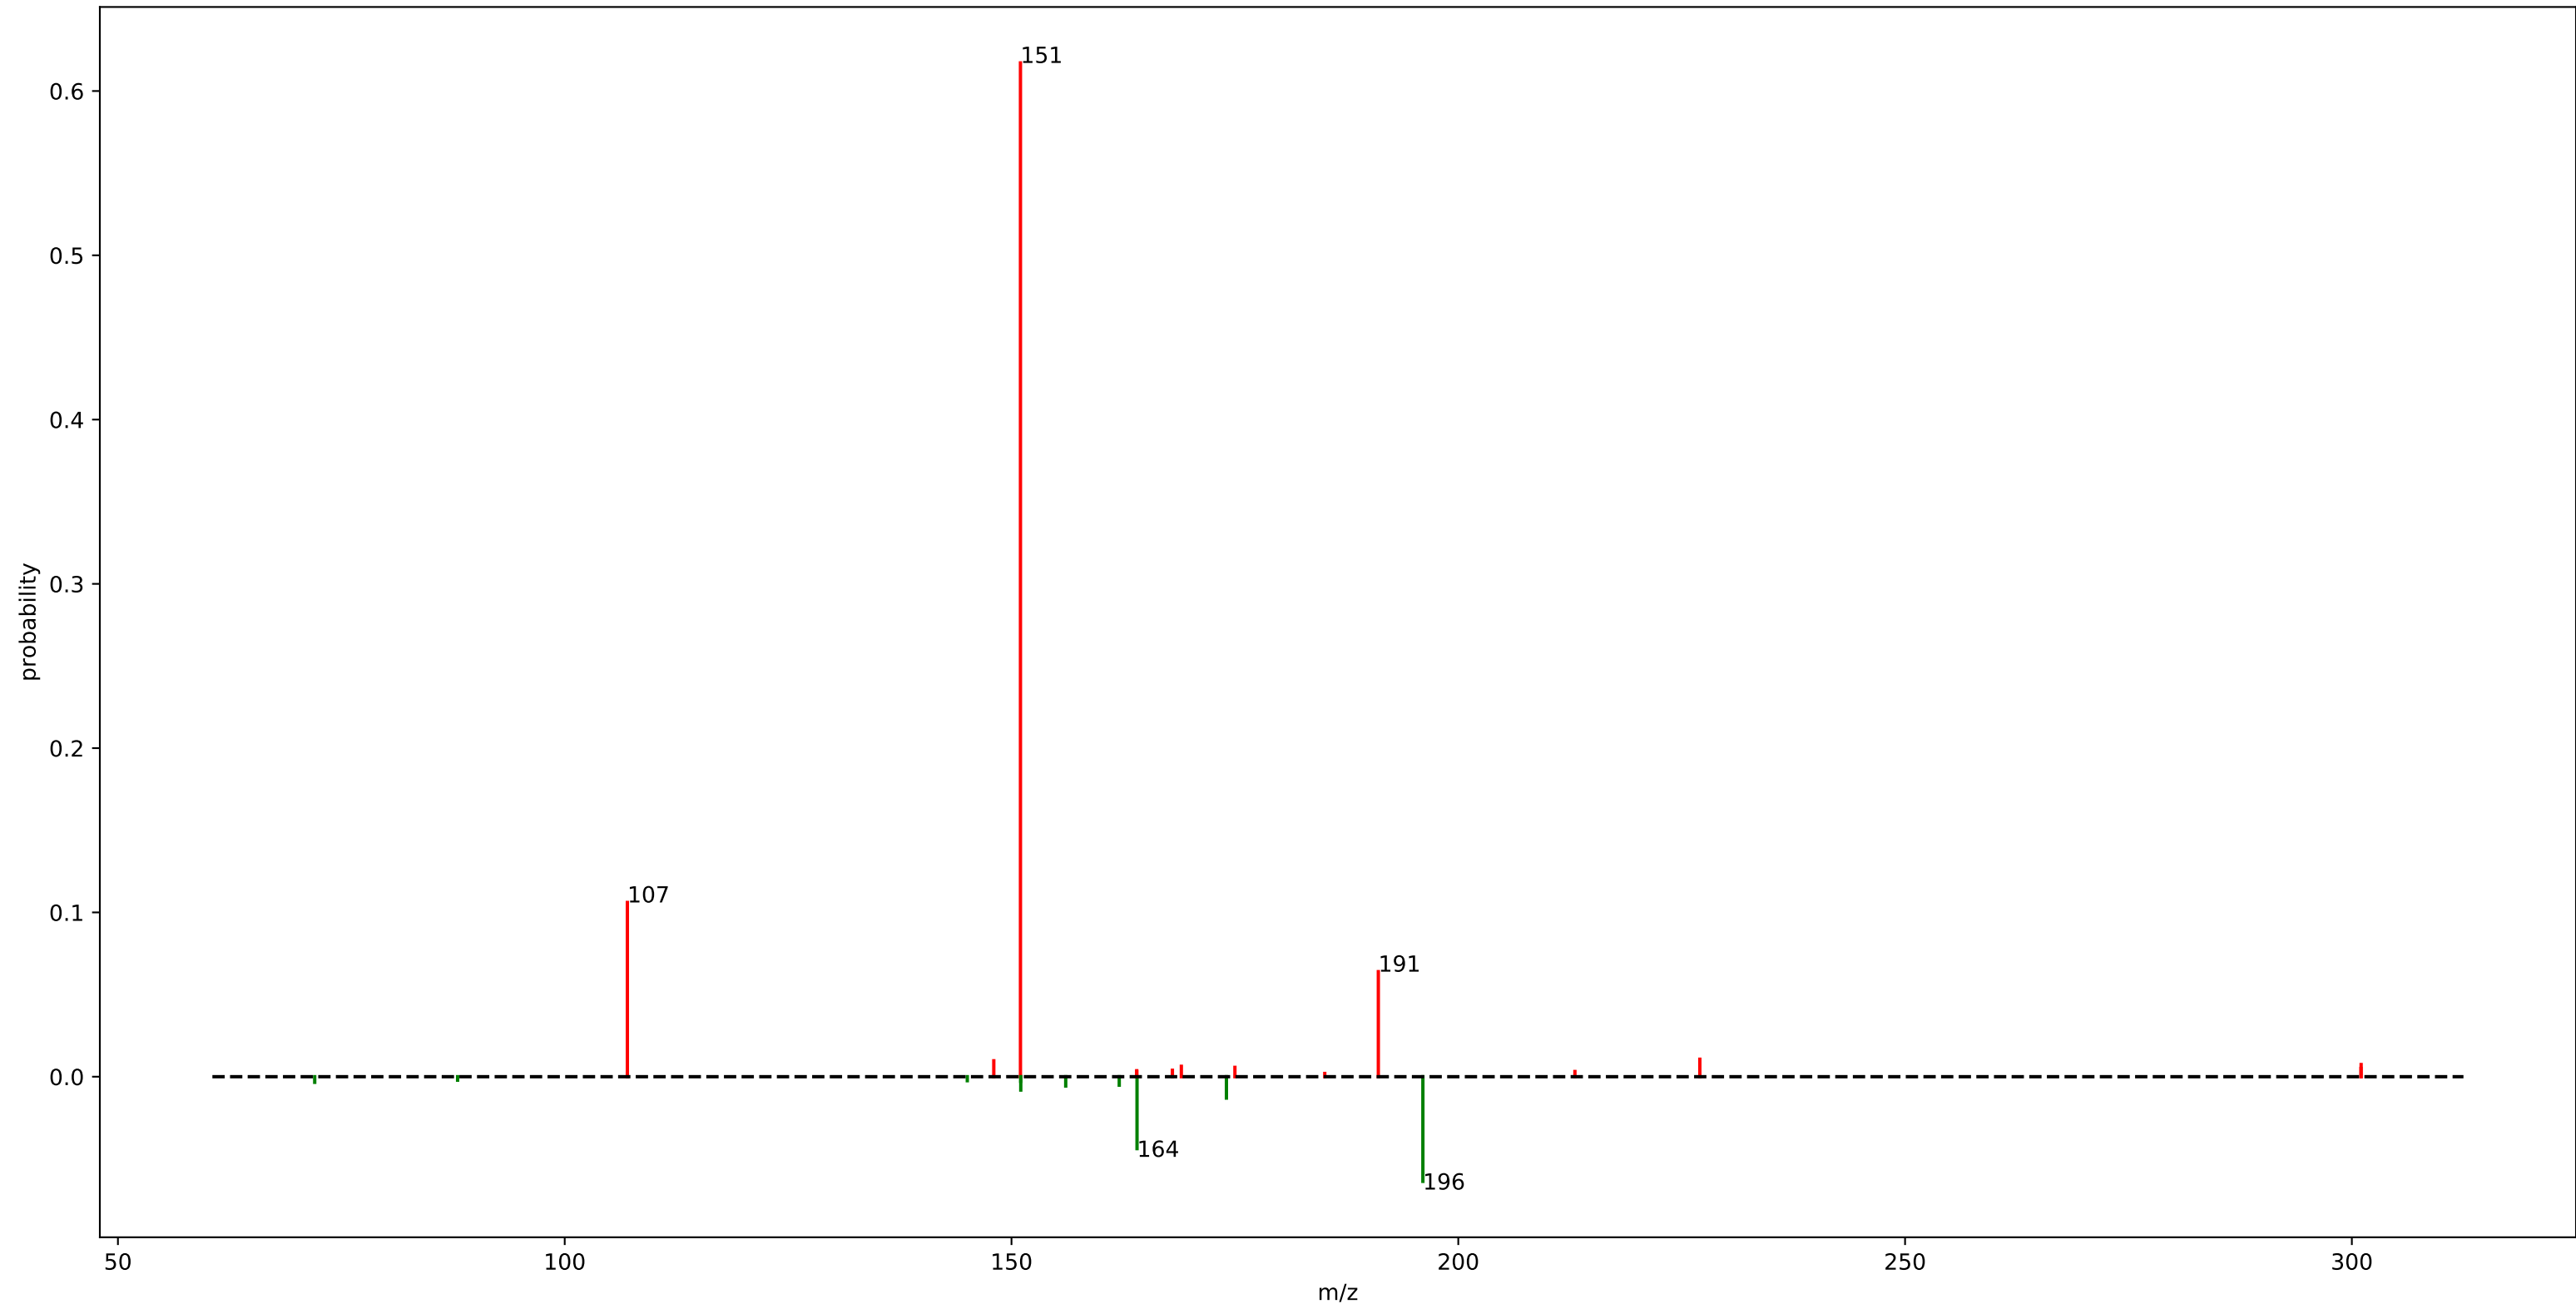

## rhamn\_motif\_140.m2m

|                   |        |
|-------------------|--------|
| fragment_151.0025 | : 0.62 |
| fragment_107.0125 | : 0.11 |
| fragment_191.0525 | : 0.06 |
| loss_196.0375     | : 0.06 |
| loss_164.0475     | : 0.04 |
| loss_174.0525     | : 0.01 |
| fragment_227.0325 | : 0.01 |
| fragment_148.0175 | : 0.01 |
| loss_151.0375     | : 0.01 |
| fragment_301.0375 | : 0.01 |
| fragment_169.0075 | : 0.01 |
| loss_156.0675     | : 0.01 |
| fragment_175.0025 | : 0.01 |
| loss_162.0575     | : 0.01 |
| fragment_301.0225 | : 0.01 |

motif\_508

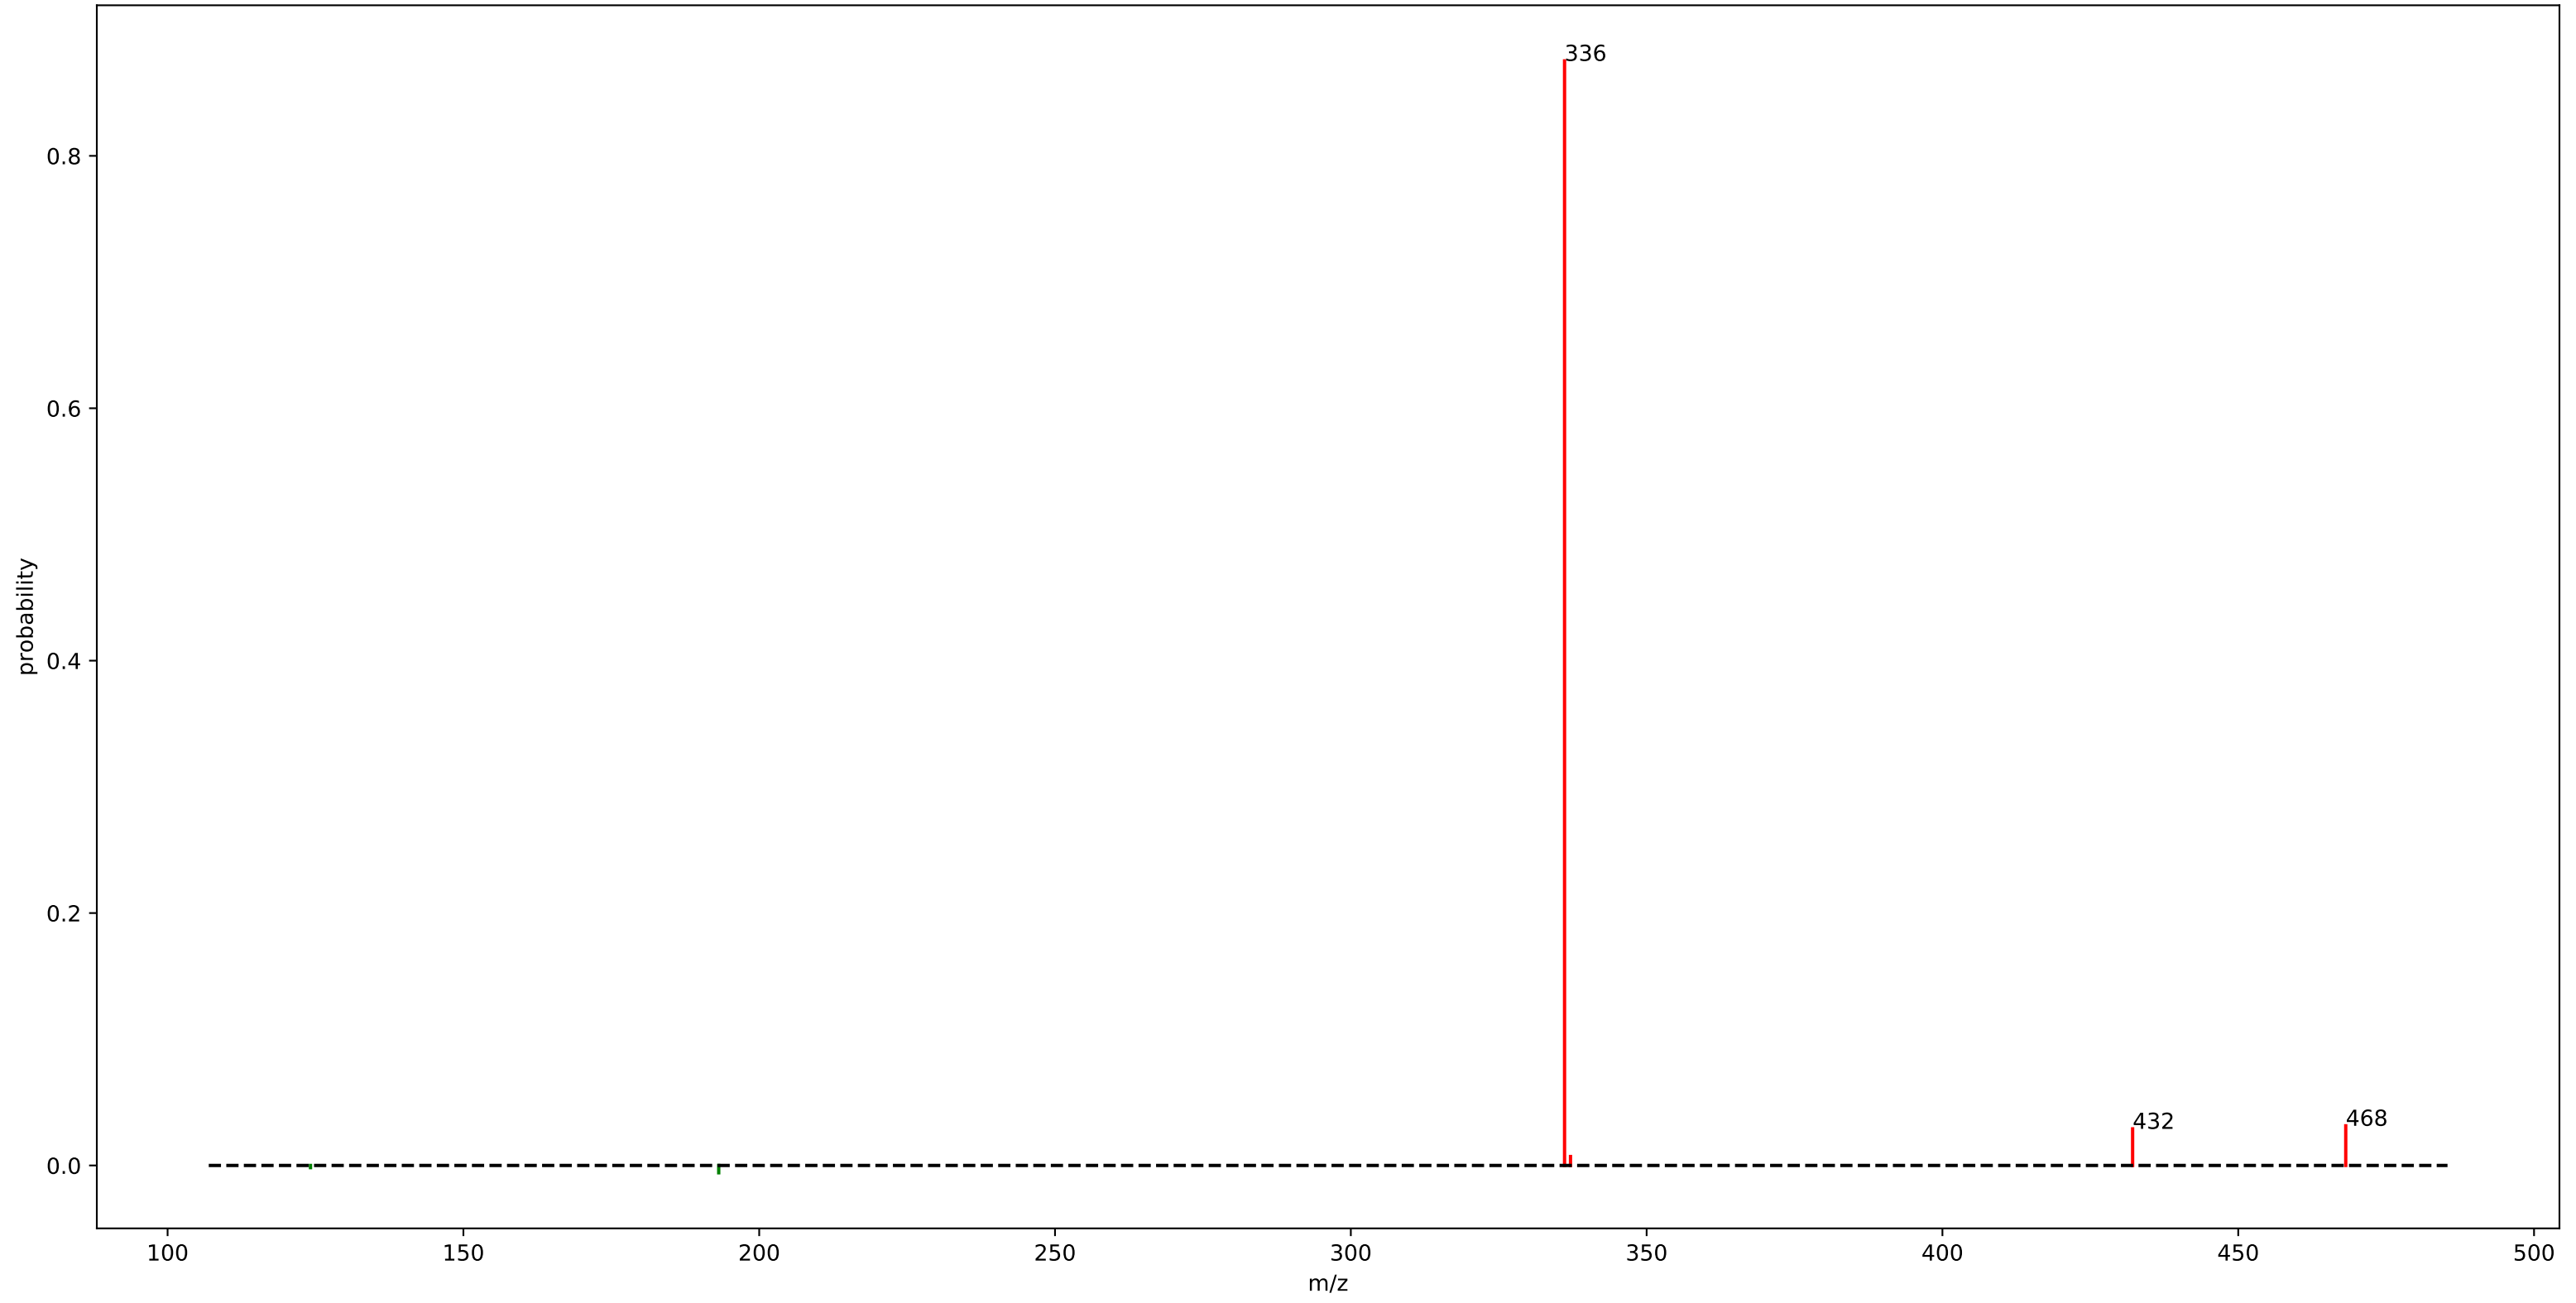

## motif\_508

|                   |        |
|-------------------|--------|
| fragment_336.1275 | : 0.88 |
| fragment_468.1725 | : 0.03 |
| fragment_432.1475 | : 0.03 |
| fragment_337.1325 | : 0.01 |
| loss_193.1575     | : 0.01 |

motif\_509

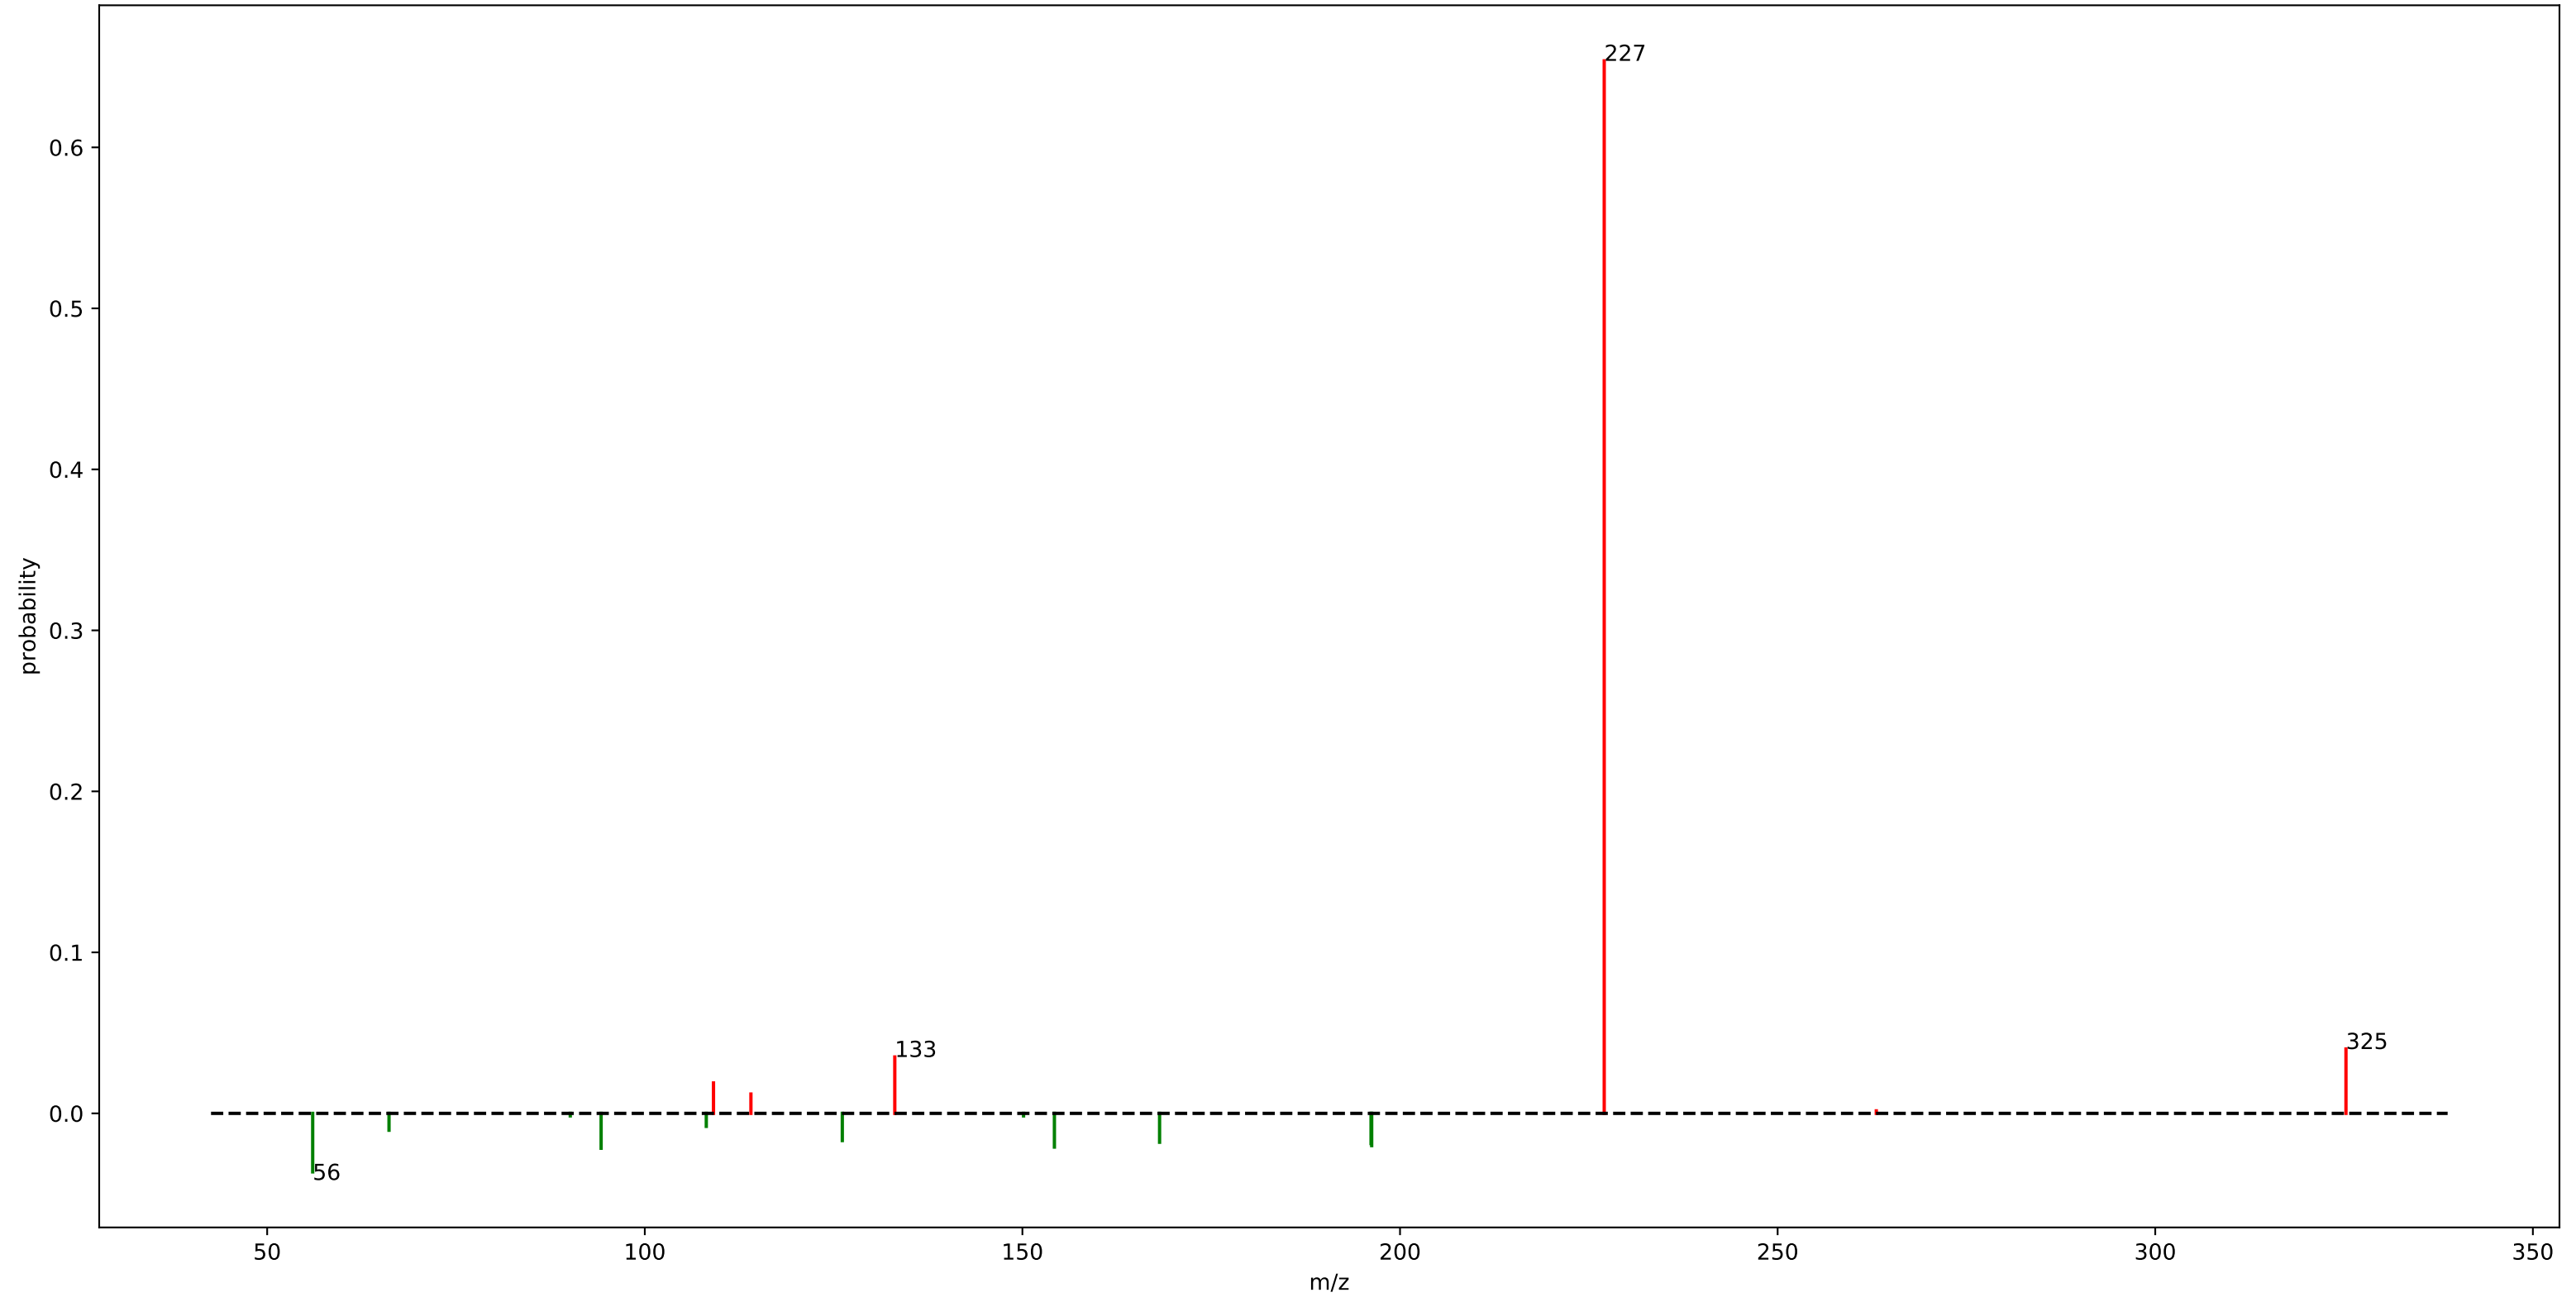

## motif\_509

|                   |        |
|-------------------|--------|
| fragment_227.0375 | : 0.65 |
| fragment_325.2525 | : 0.04 |
| loss_56.0275      | : 0.04 |
| fragment_133.1025 | : 0.04 |
| loss_94.2175      | : 0.02 |
| loss_154.2375     | : 0.02 |
| loss_196.2475     | : 0.02 |
| fragment_109.0975 | : 0.02 |
| loss_196.1625     | : 0.02 |
| loss_168.1625     | : 0.02 |
| loss_126.1525     | : 0.02 |
| fragment_114.0525 | : 0.01 |
| loss_66.1325      | : 0.01 |
| loss_108.1425     | : 0.01 |

motif\_663

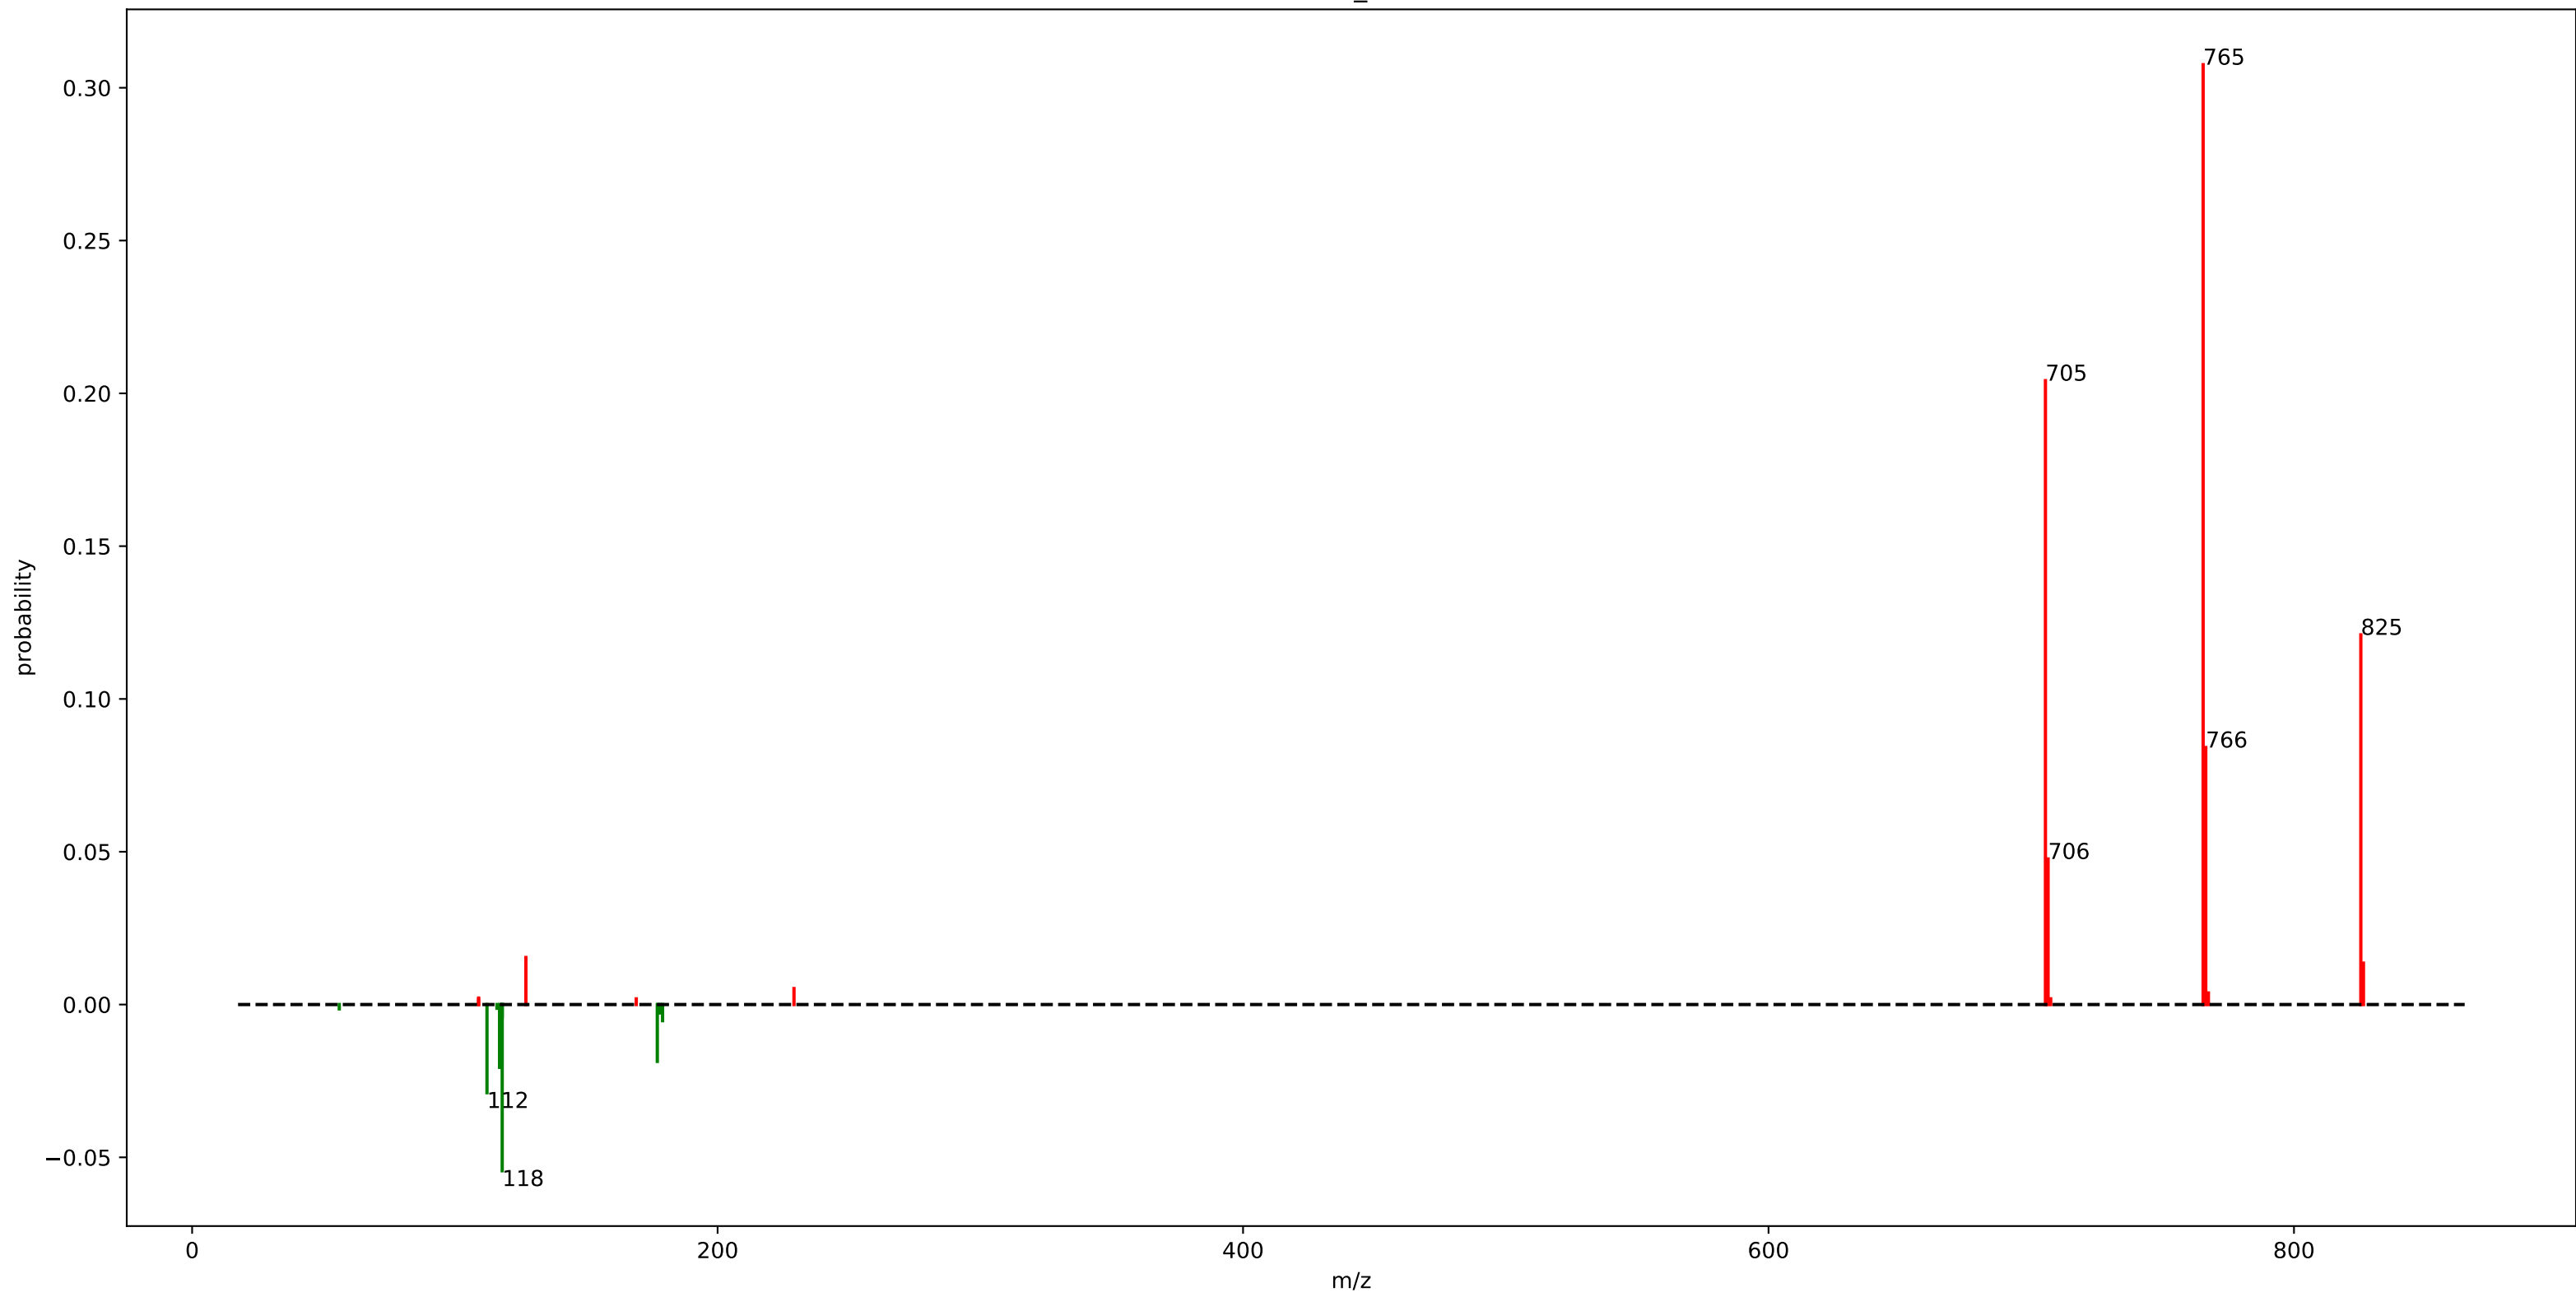

## motif\_663

|                   |        |
|-------------------|--------|
| fragment_765.4175 | : 0.31 |
| fragment_705.3975 | : 0.20 |
| fragment_825.4425 | : 0.12 |
| fragment_766.4225 | : 0.08 |
| loss_118.0225     | : 0.05 |
| fragment_706.4025 | : 0.05 |
| loss_112.2275     | : 0.03 |
| loss_117.0175     | : 0.02 |
| loss_177.0525     | : 0.02 |
| fragment_127.0375 | : 0.02 |
| fragment_826.4425 | : 0.01 |
| loss_179.0575     | : 0.01 |
| fragment_229.0775 | : 0.01 |



motif\_662

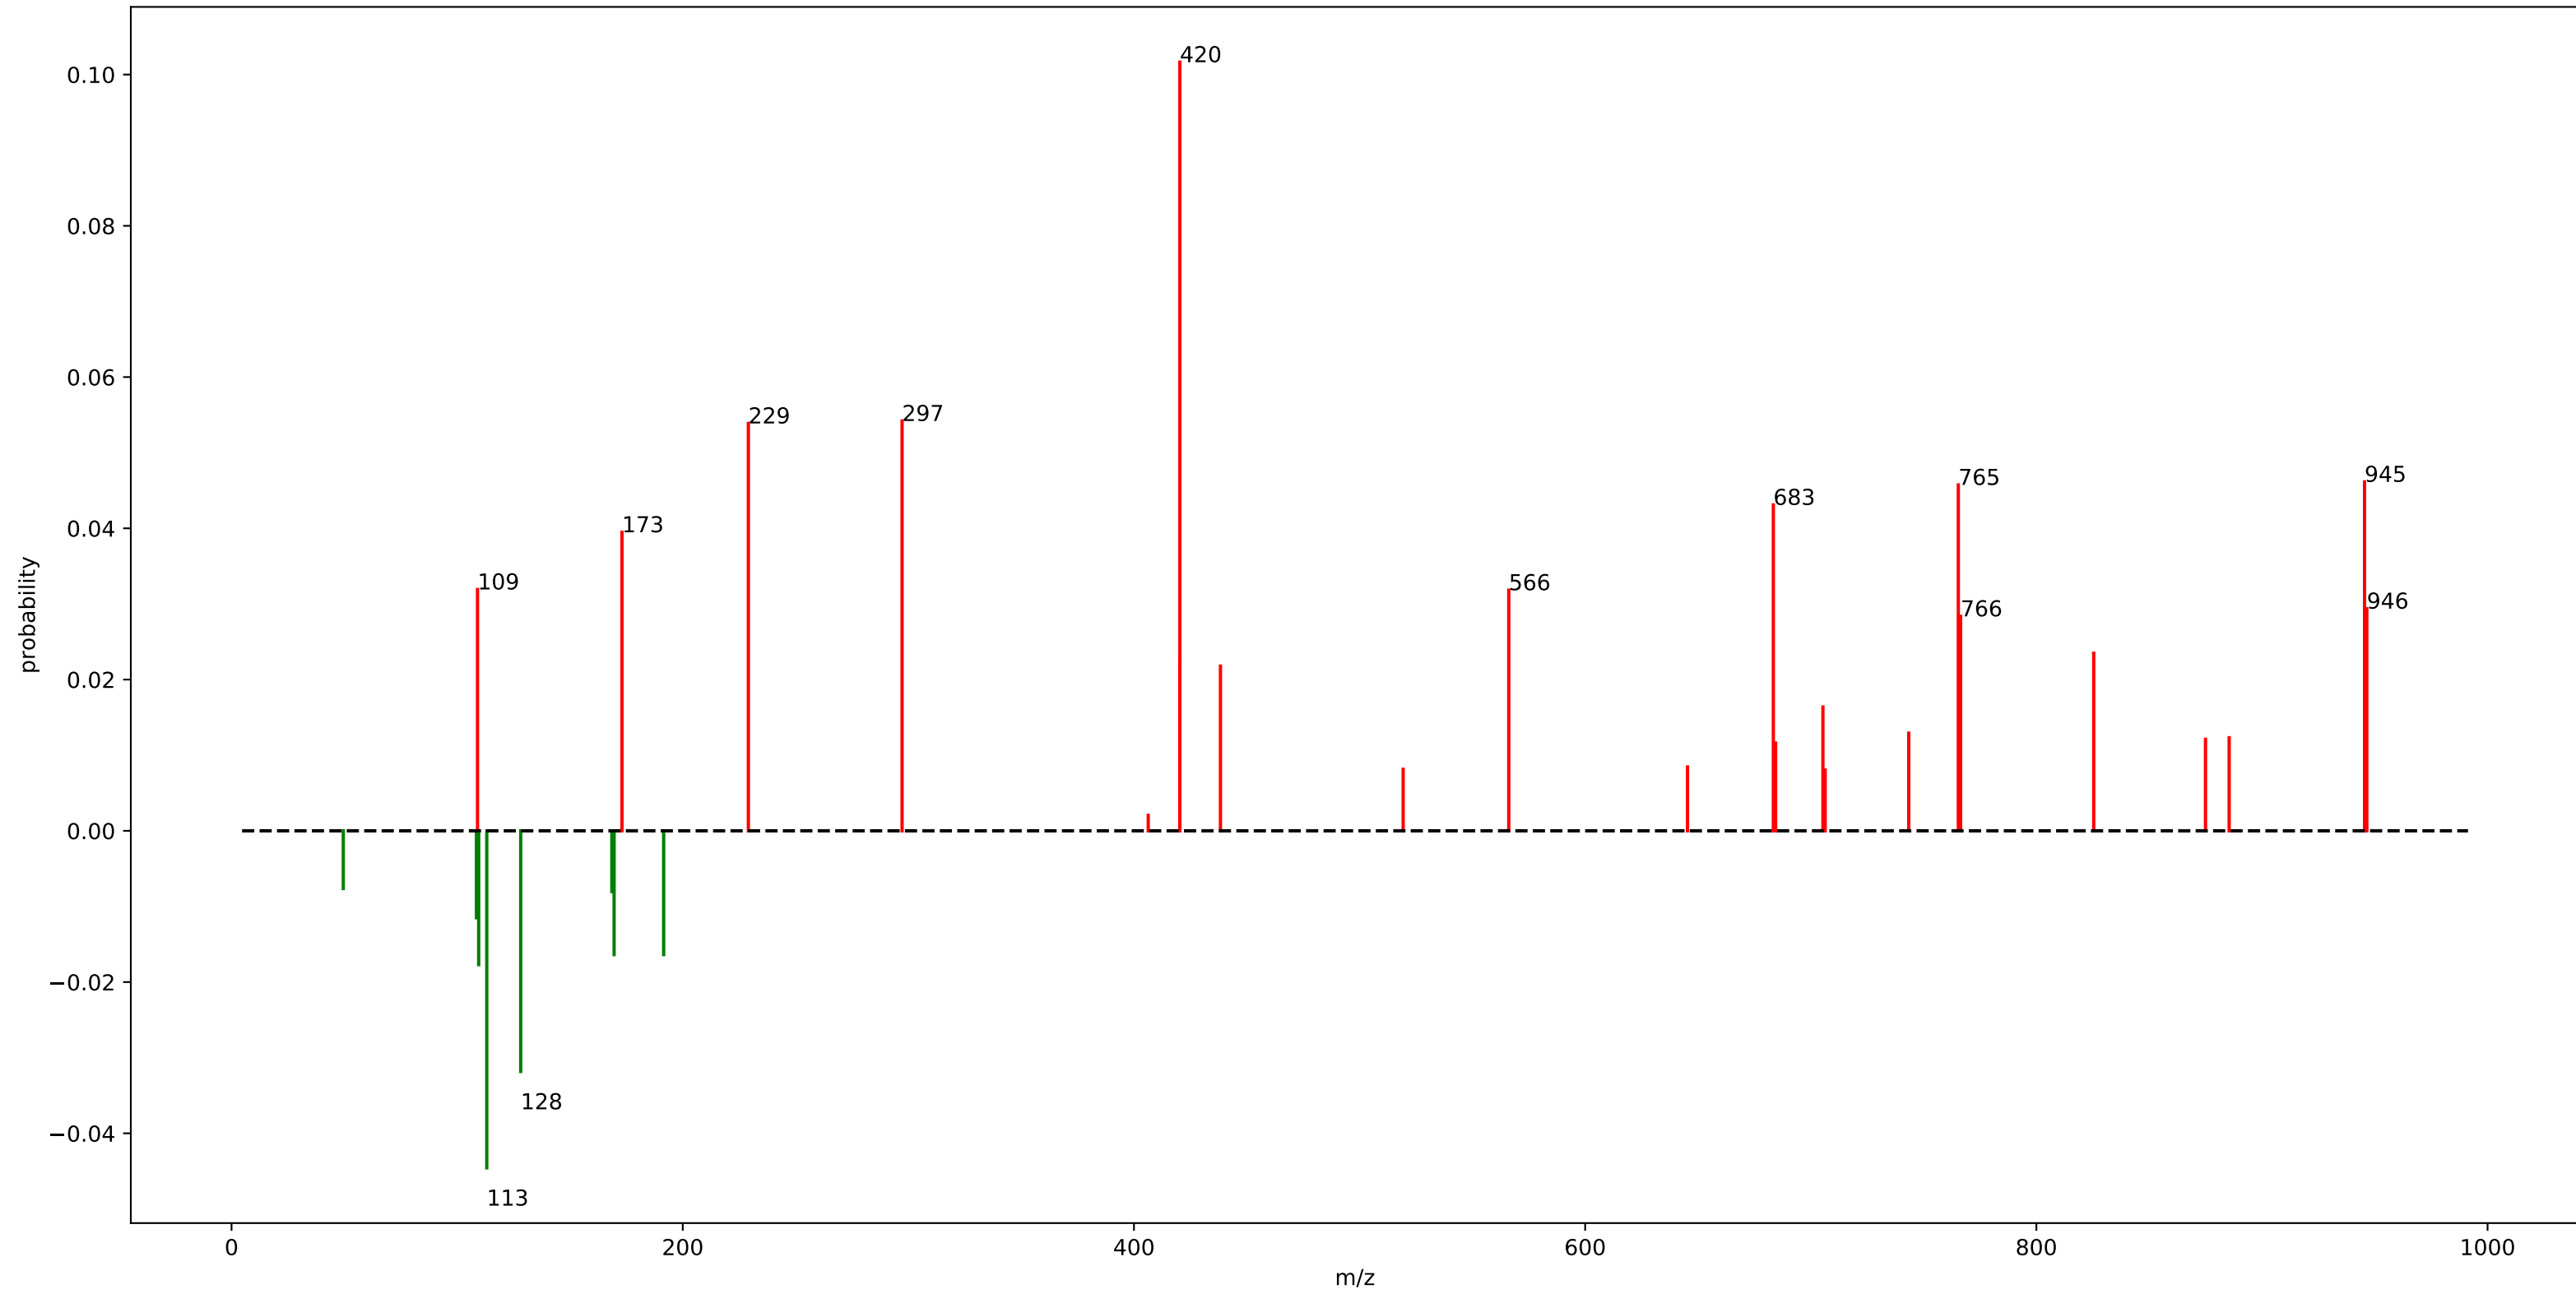

## motif\_662

|                   |        |                   |        |
|-------------------|--------|-------------------|--------|
| fragment_420.3425 | : 0.10 | fragment_743.4375 | : 0.01 |
| fragment_297.2225 | : 0.05 | fragment_885.4525 | : 0.01 |
| fragment_229.0875 | : 0.05 | fragment_874.9675 | : 0.01 |
| fragment_945.4675 | : 0.05 | fragment_684.4175 | : 0.01 |
| fragment_765.4075 | : 0.05 | loss_108.5525     | : 0.01 |
| loss_113.1375     | : 0.04 | fragment_645.3625 | : 0.01 |
| fragment_683.4175 | : 0.04 | fragment_519.3325 | : 0.01 |
| fragment_173.0675 | : 0.04 | fragment_706.3875 | : 0.01 |
| fragment_109.0325 | : 0.03 | loss_168.5725     | : 0.01 |
| fragment_566.1375 | : 0.03 | loss_49.5325      | : 0.01 |
| loss_128.1775     | : 0.03 |                   |        |
| fragment_946.4725 | : 0.03 |                   |        |
| fragment_766.4075 | : 0.03 |                   |        |
| fragment_825.4275 | : 0.02 |                   |        |
| fragment_420.3325 | : 0.02 |                   |        |
| fragment_438.3425 | : 0.02 |                   |        |
| loss_109.5525     | : 0.02 |                   |        |
| loss_191.5475     | : 0.02 |                   |        |
| fragment_705.3875 | : 0.02 |                   |        |
| loss_169.5775     | : 0.02 |                   |        |

StrepSalini\_motif\_10.m2m

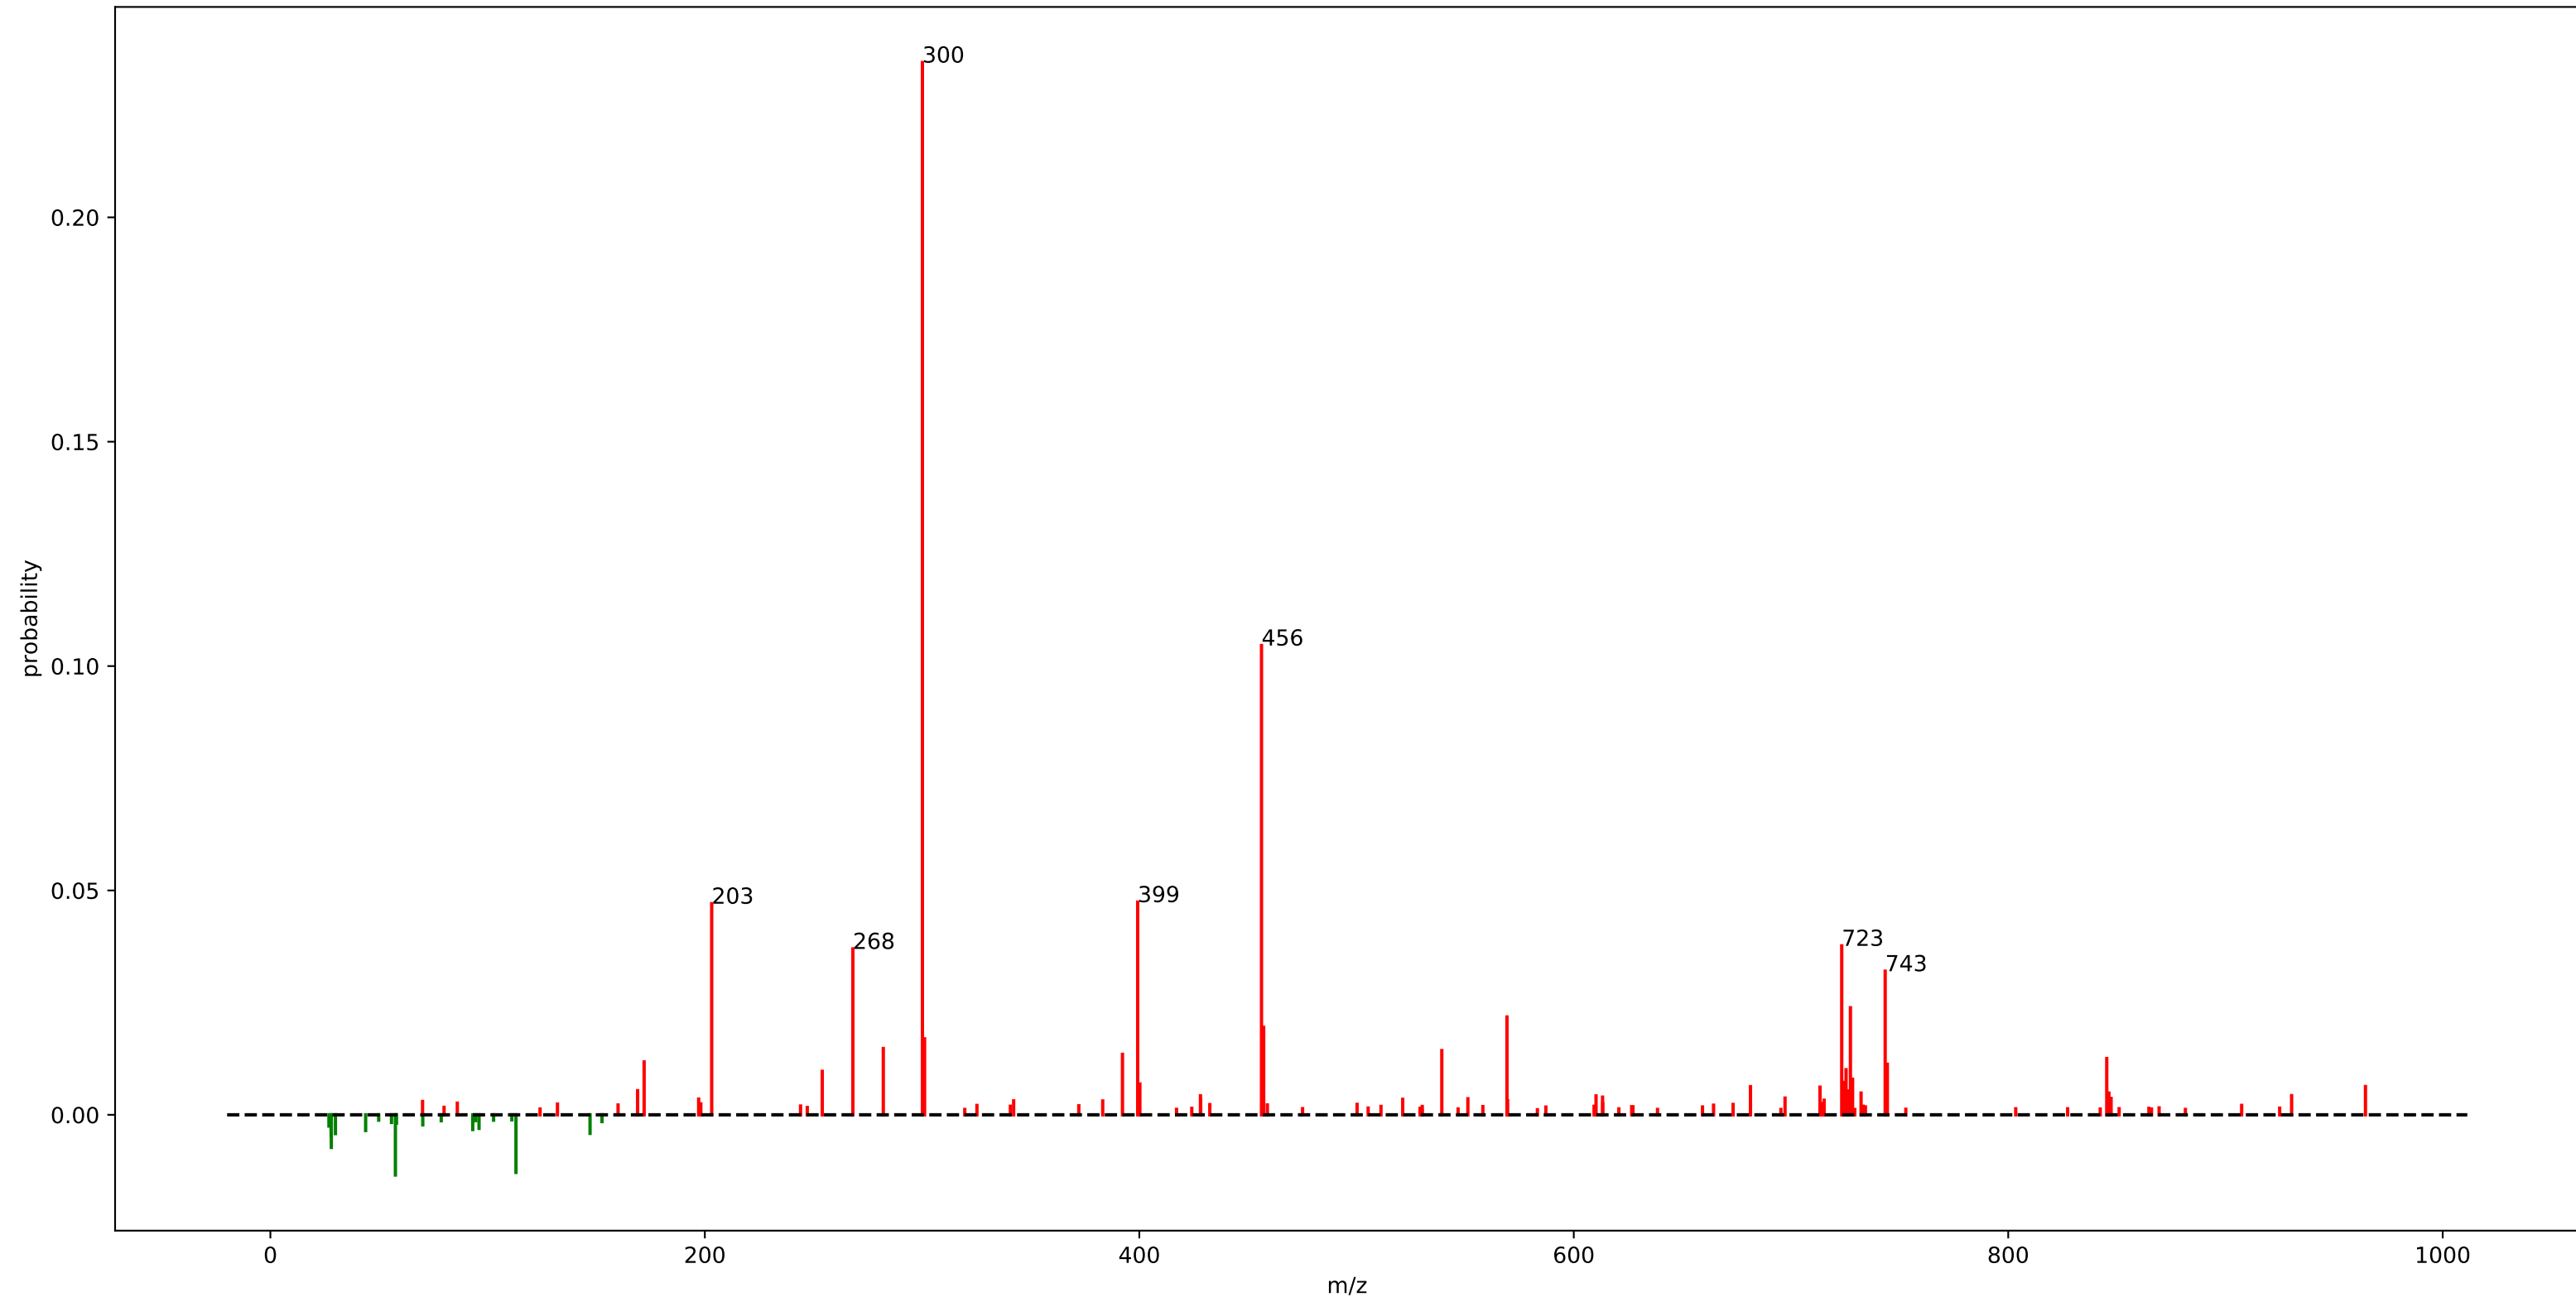

## StrepSalini\_motif\_10.m2m

|                   |        |                   |        |
|-------------------|--------|-------------------|--------|
| fragment_300.1525 | : 0.23 | fragment_254.0500 | : 0.01 |
| fragment_456.2500 | : 0.10 | fragment_728.3500 | : 0.01 |
| fragment_399.2500 | : 0.05 | loss_28.0500      | : 0.01 |
| fragment_203.1500 | : 0.05 | fragment_724.3500 | : 0.01 |
| fragment_723.3500 | : 0.04 | fragment_400.2500 | : 0.01 |
| fragment_268.1525 | : 0.04 | fragment_964.4500 | : 0.01 |
| fragment_743.3500 | : 0.03 | fragment_681.3500 | : 0.01 |
| fragment_727.3500 | : 0.02 | fragment_713.3500 | : 0.01 |
| fragment_569.2500 | : 0.02 | fragment_169.0500 | : 0.01 |
| fragment_457.2500 | : 0.02 | fragment_726.3500 | : 0.01 |
| fragment_301.1500 | : 0.02 |                   |        |
| fragment_282.1500 | : 0.01 |                   |        |
| fragment_539.2500 | : 0.01 |                   |        |
| fragment_392.2500 | : 0.01 |                   |        |
| loss_57.5500      | : 0.01 |                   |        |
| loss_113.0500     | : 0.01 |                   |        |
| fragment_845.3500 | : 0.01 |                   |        |
| fragment_172.0500 | : 0.01 |                   |        |
| fragment_744.3500 | : 0.01 |                   |        |
| fragment_725.3500 | : 0.01 |                   |        |

motif\_528

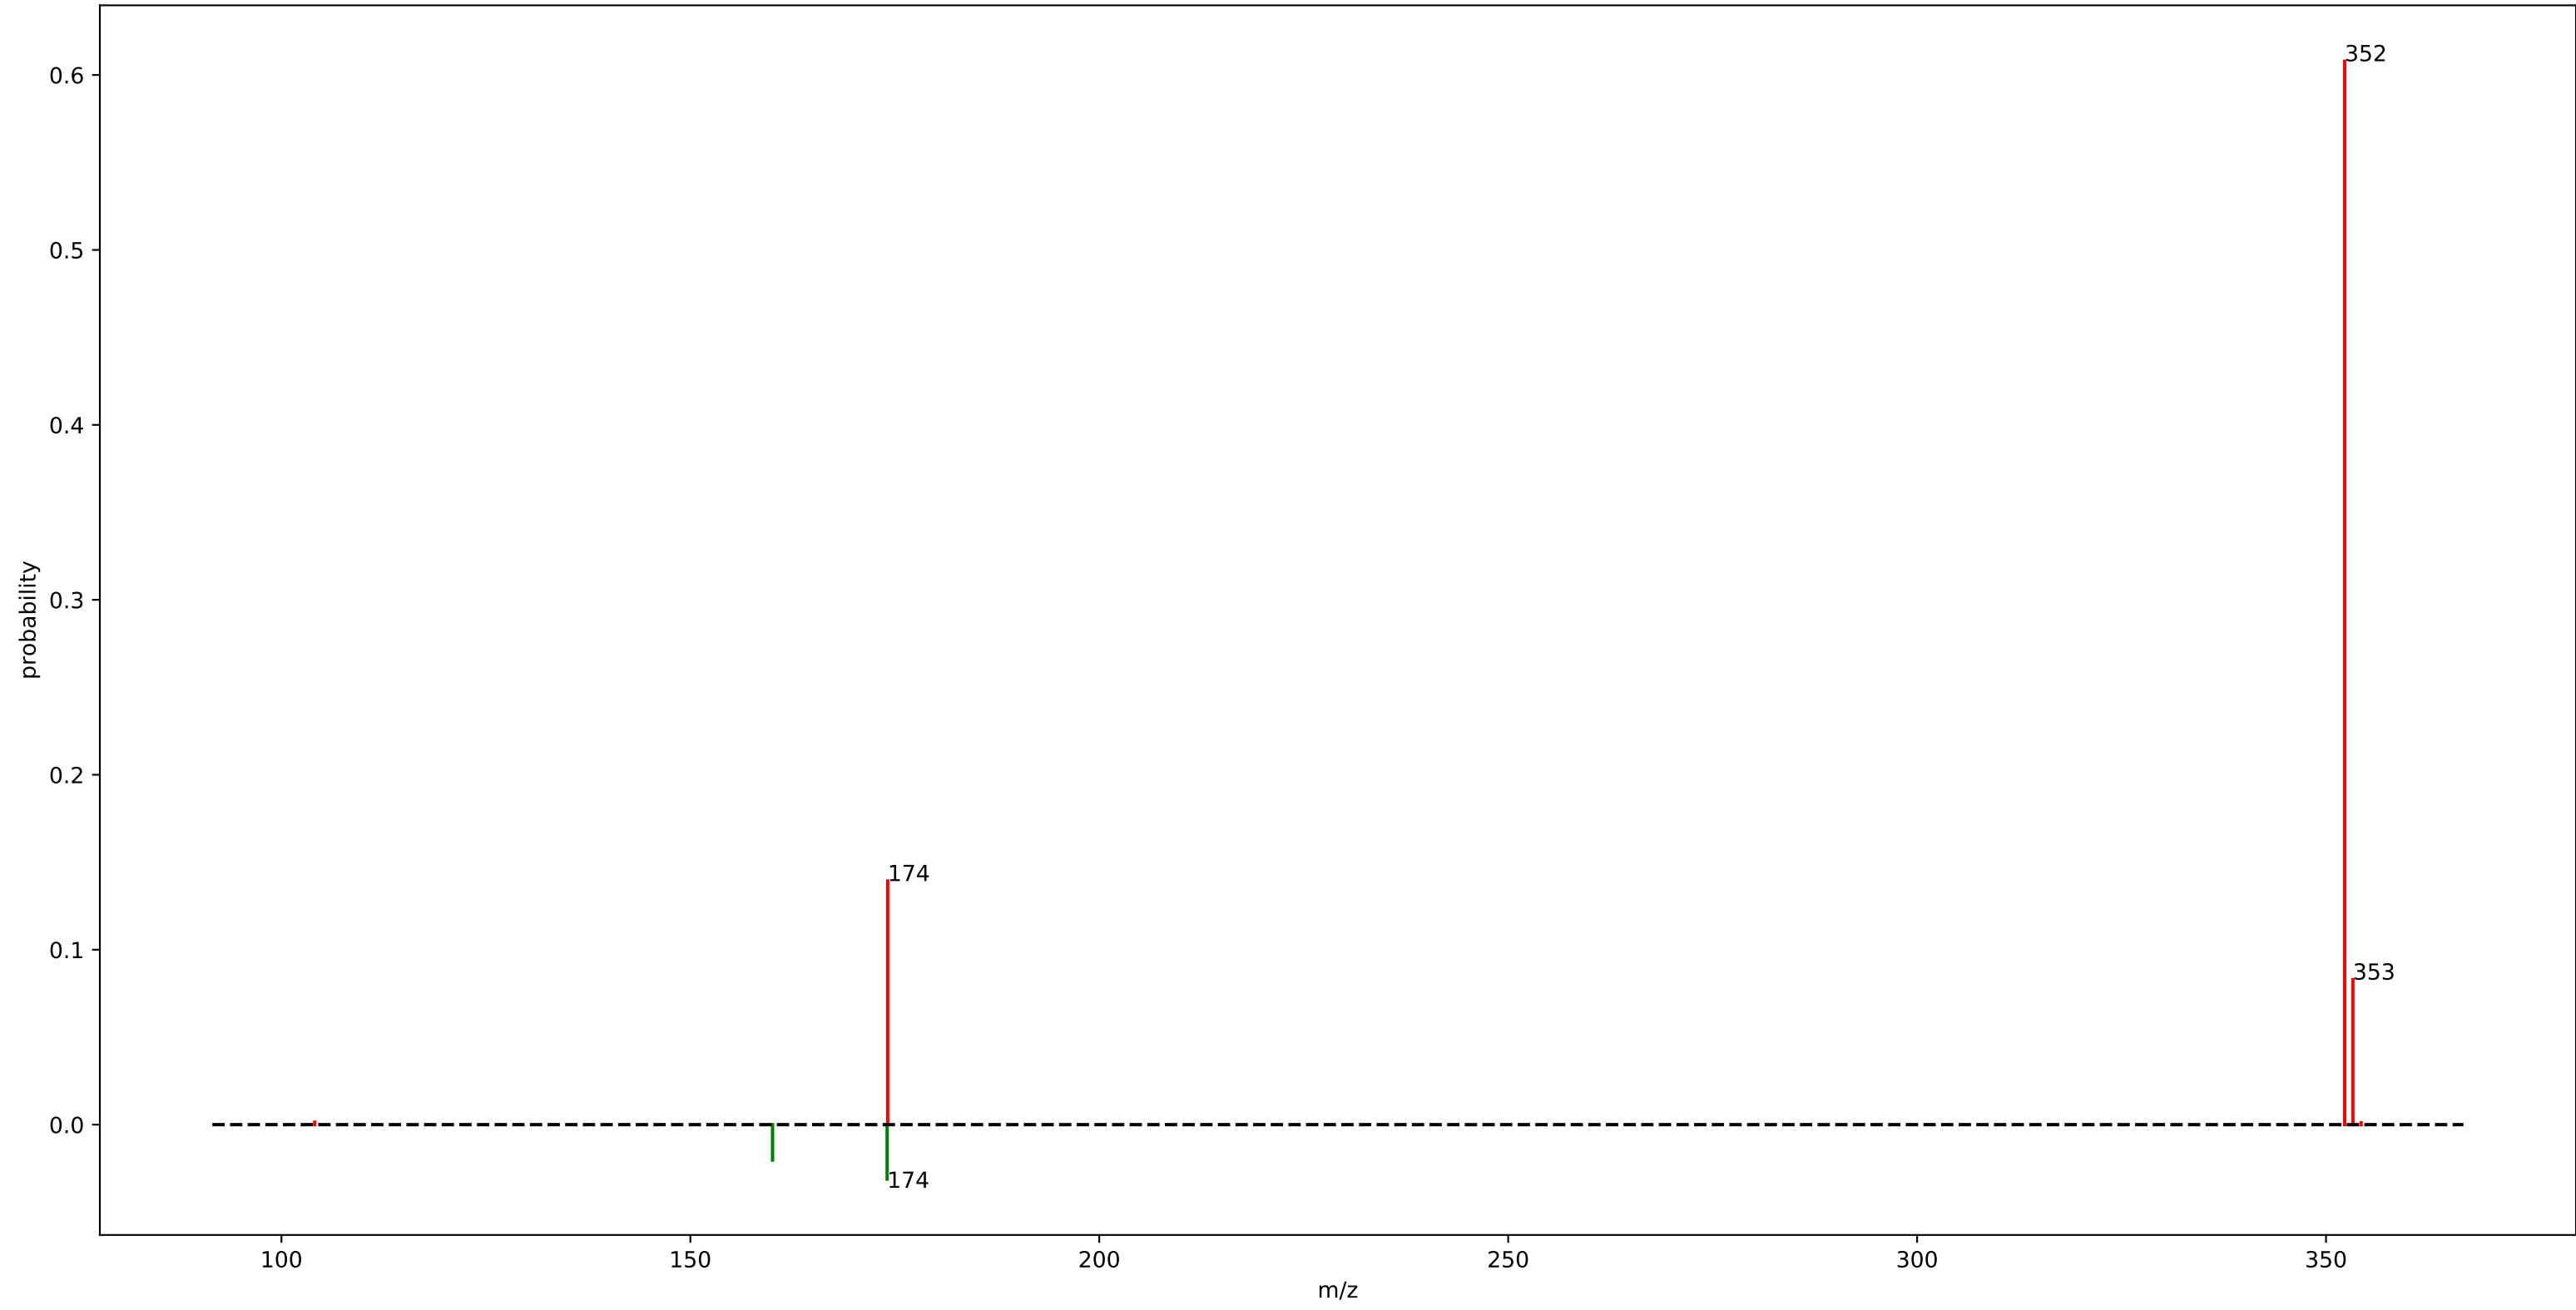

## motif\_528

|                   |        |
|-------------------|--------|
| fragment_352.2825 | : 0.61 |
| fragment_174.1275 | : 0.14 |
| fragment_353.2875 | : 0.08 |
| loss_174.0625     | : 0.03 |
| loss_160.0475     | : 0.02 |

motif\_667

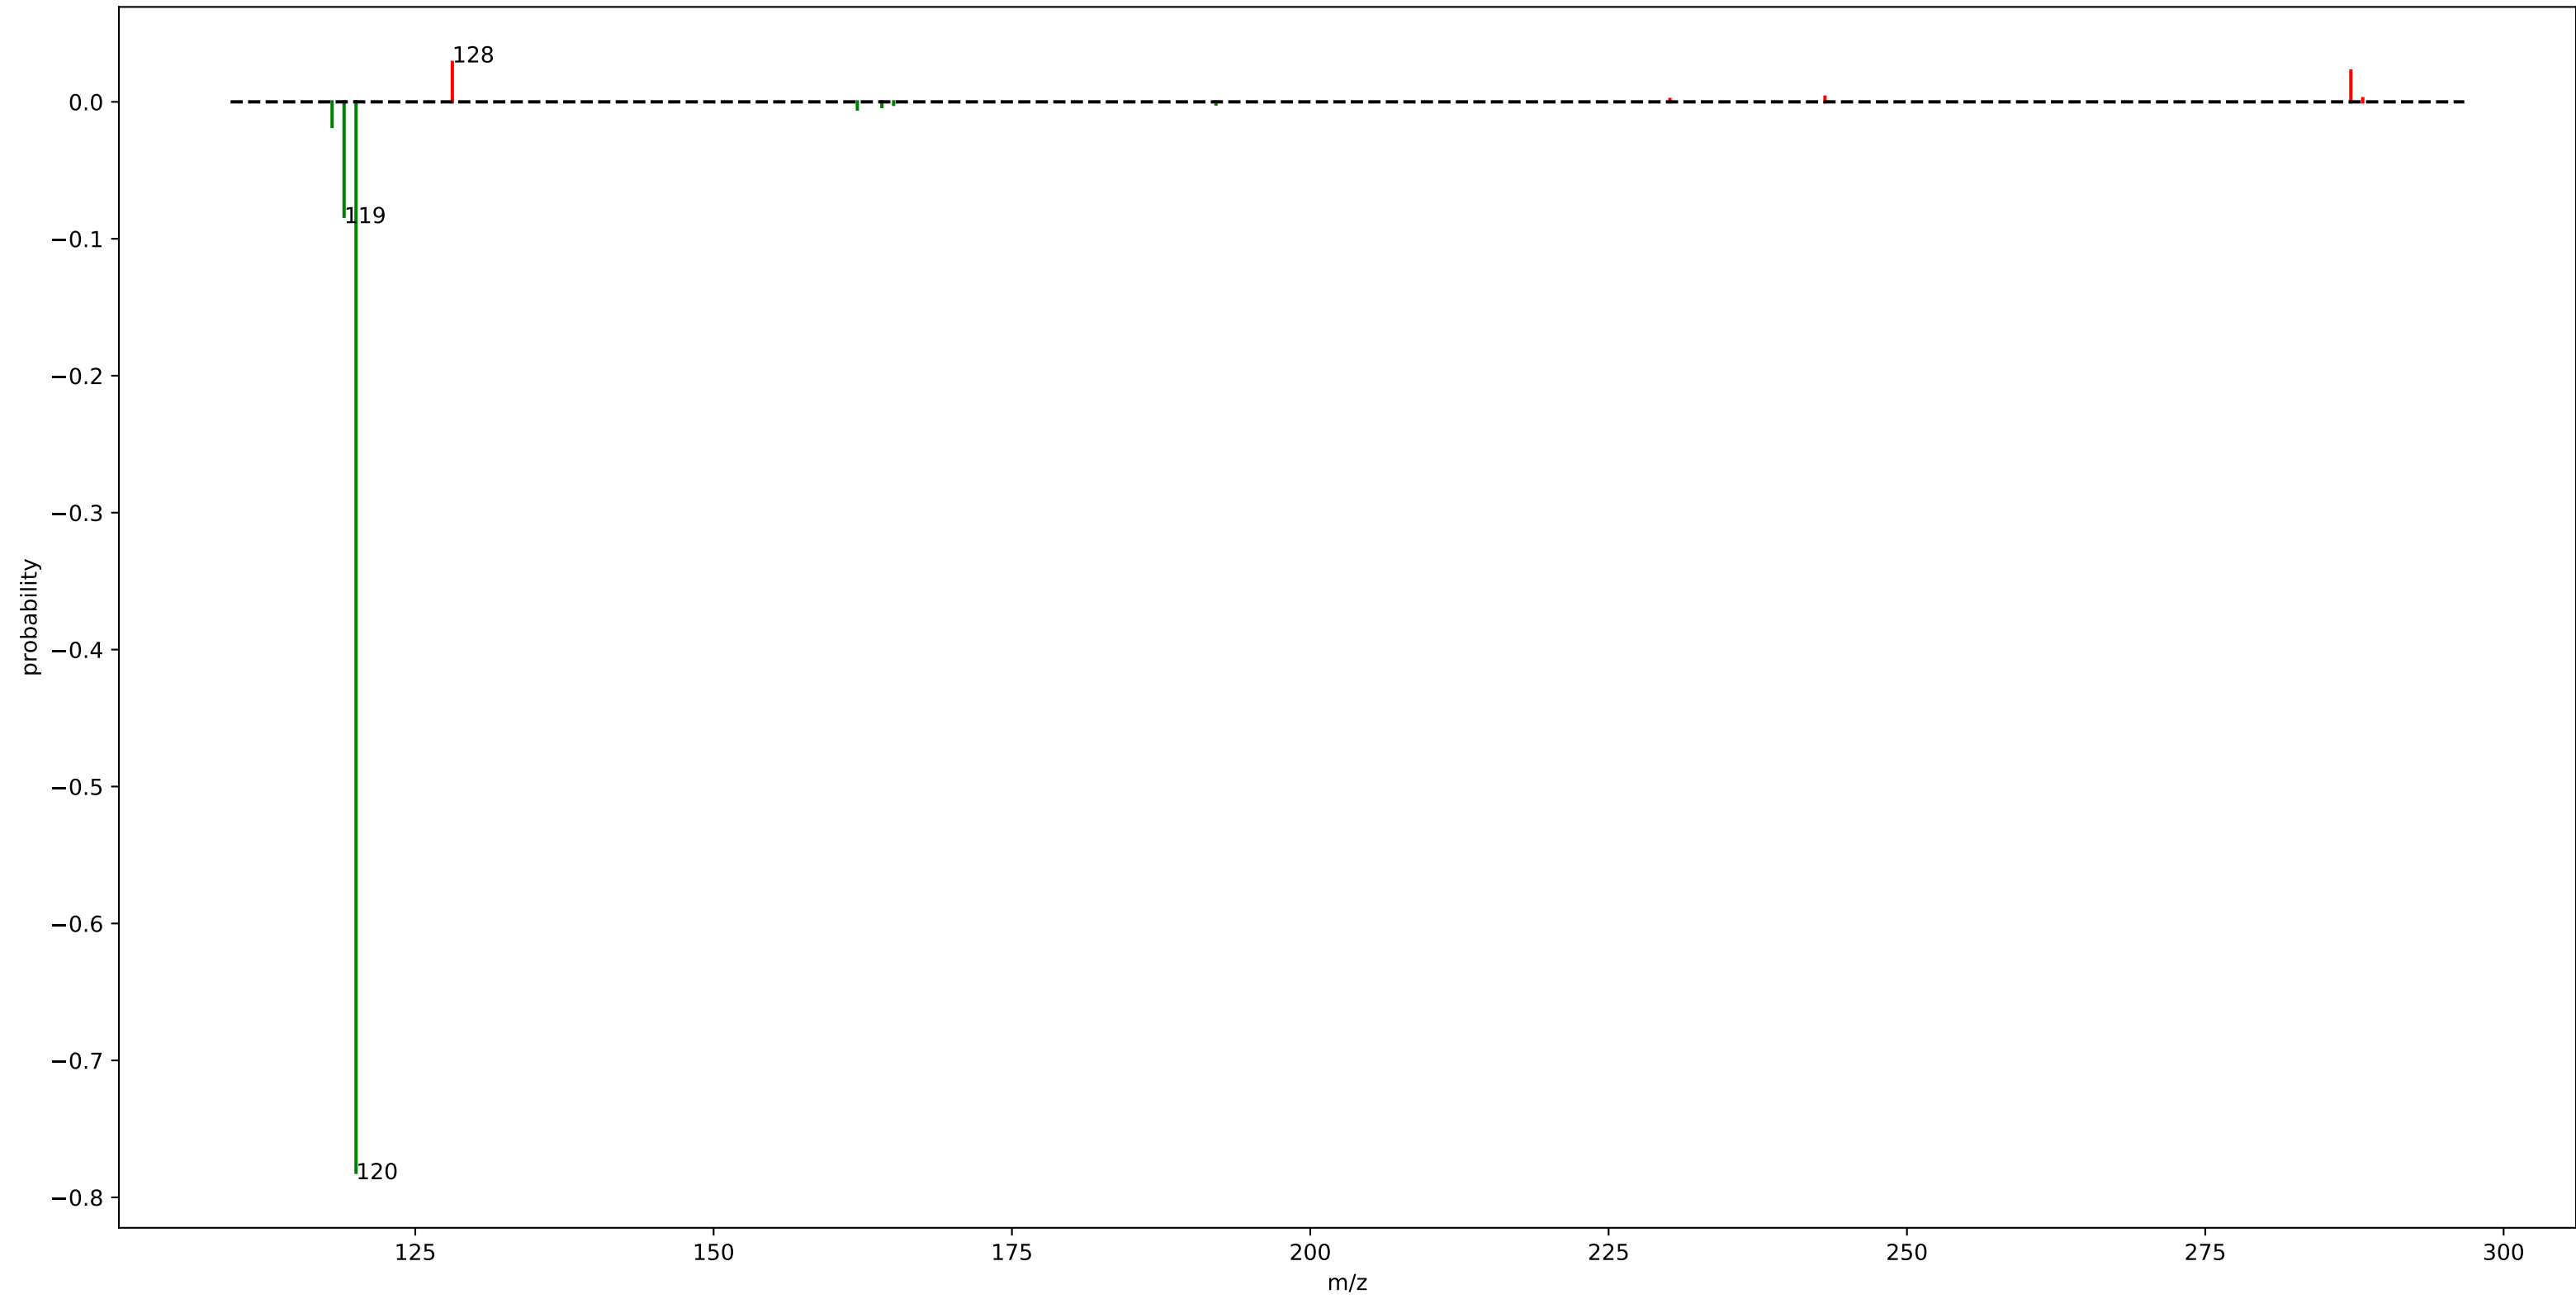

## motif\_667

|                   |        |
|-------------------|--------|
| loss_120.0375     | : 0.78 |
| loss_119.0375     | : 0.08 |
| fragment_128.1075 | : 0.03 |
| fragment_287.1975 | : 0.02 |
| loss_118.0325     | : 0.02 |
| loss_162.0475     | : 0.01 |



motif\_666

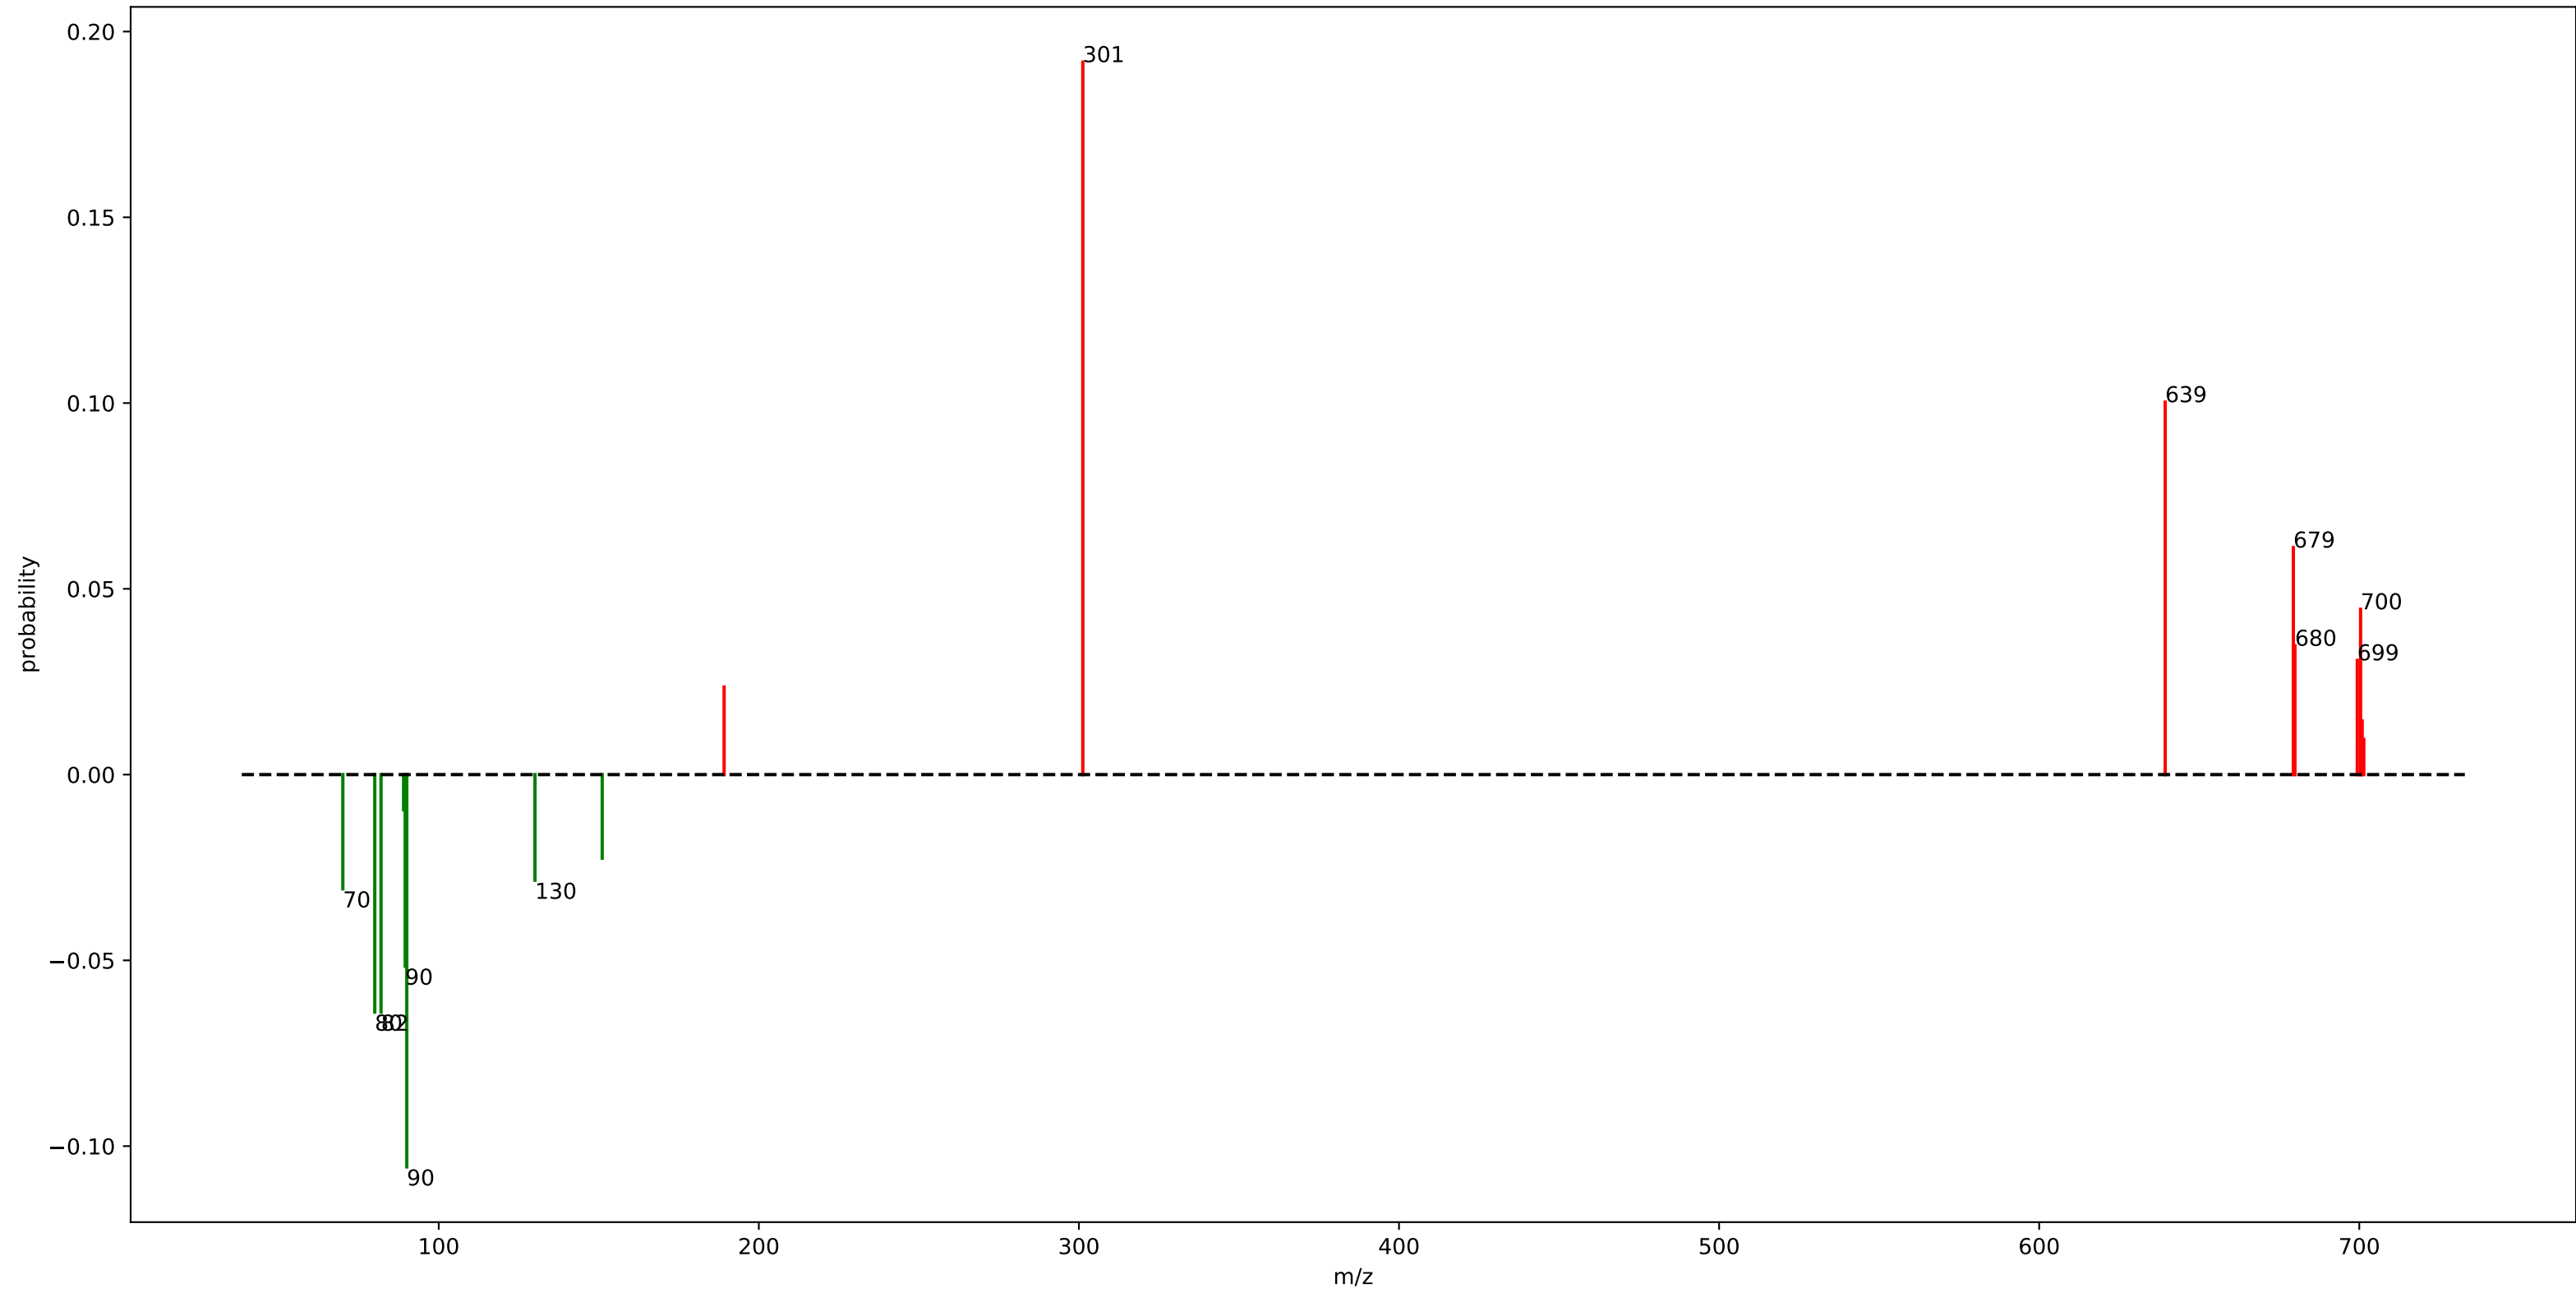

## motif\_666

|                   |        |
|-------------------|--------|
| fragment_301.2175 | : 0.19 |
| loss_90.0275      | : 0.11 |
| fragment_639.3575 | : 0.10 |
| loss_81.9775      | : 0.06 |
| loss_80.0225      | : 0.06 |
| fragment_679.3975 | : 0.06 |
| loss_89.5275      | : 0.05 |
| fragment_700.4025 | : 0.04 |
| fragment_679.8975 | : 0.03 |
| loss_70.0475      | : 0.03 |
| fragment_699.3775 | : 0.03 |
| loss_130.0675     | : 0.03 |
| fragment_189.1625 | : 0.02 |
| loss_151.0725     | : 0.02 |
| fragment_700.9025 | : 0.01 |
| fragment_701.4075 | : 0.01 |
| loss_89.0225      | : 0.01 |

urine\_mass2motif\_256.m2m

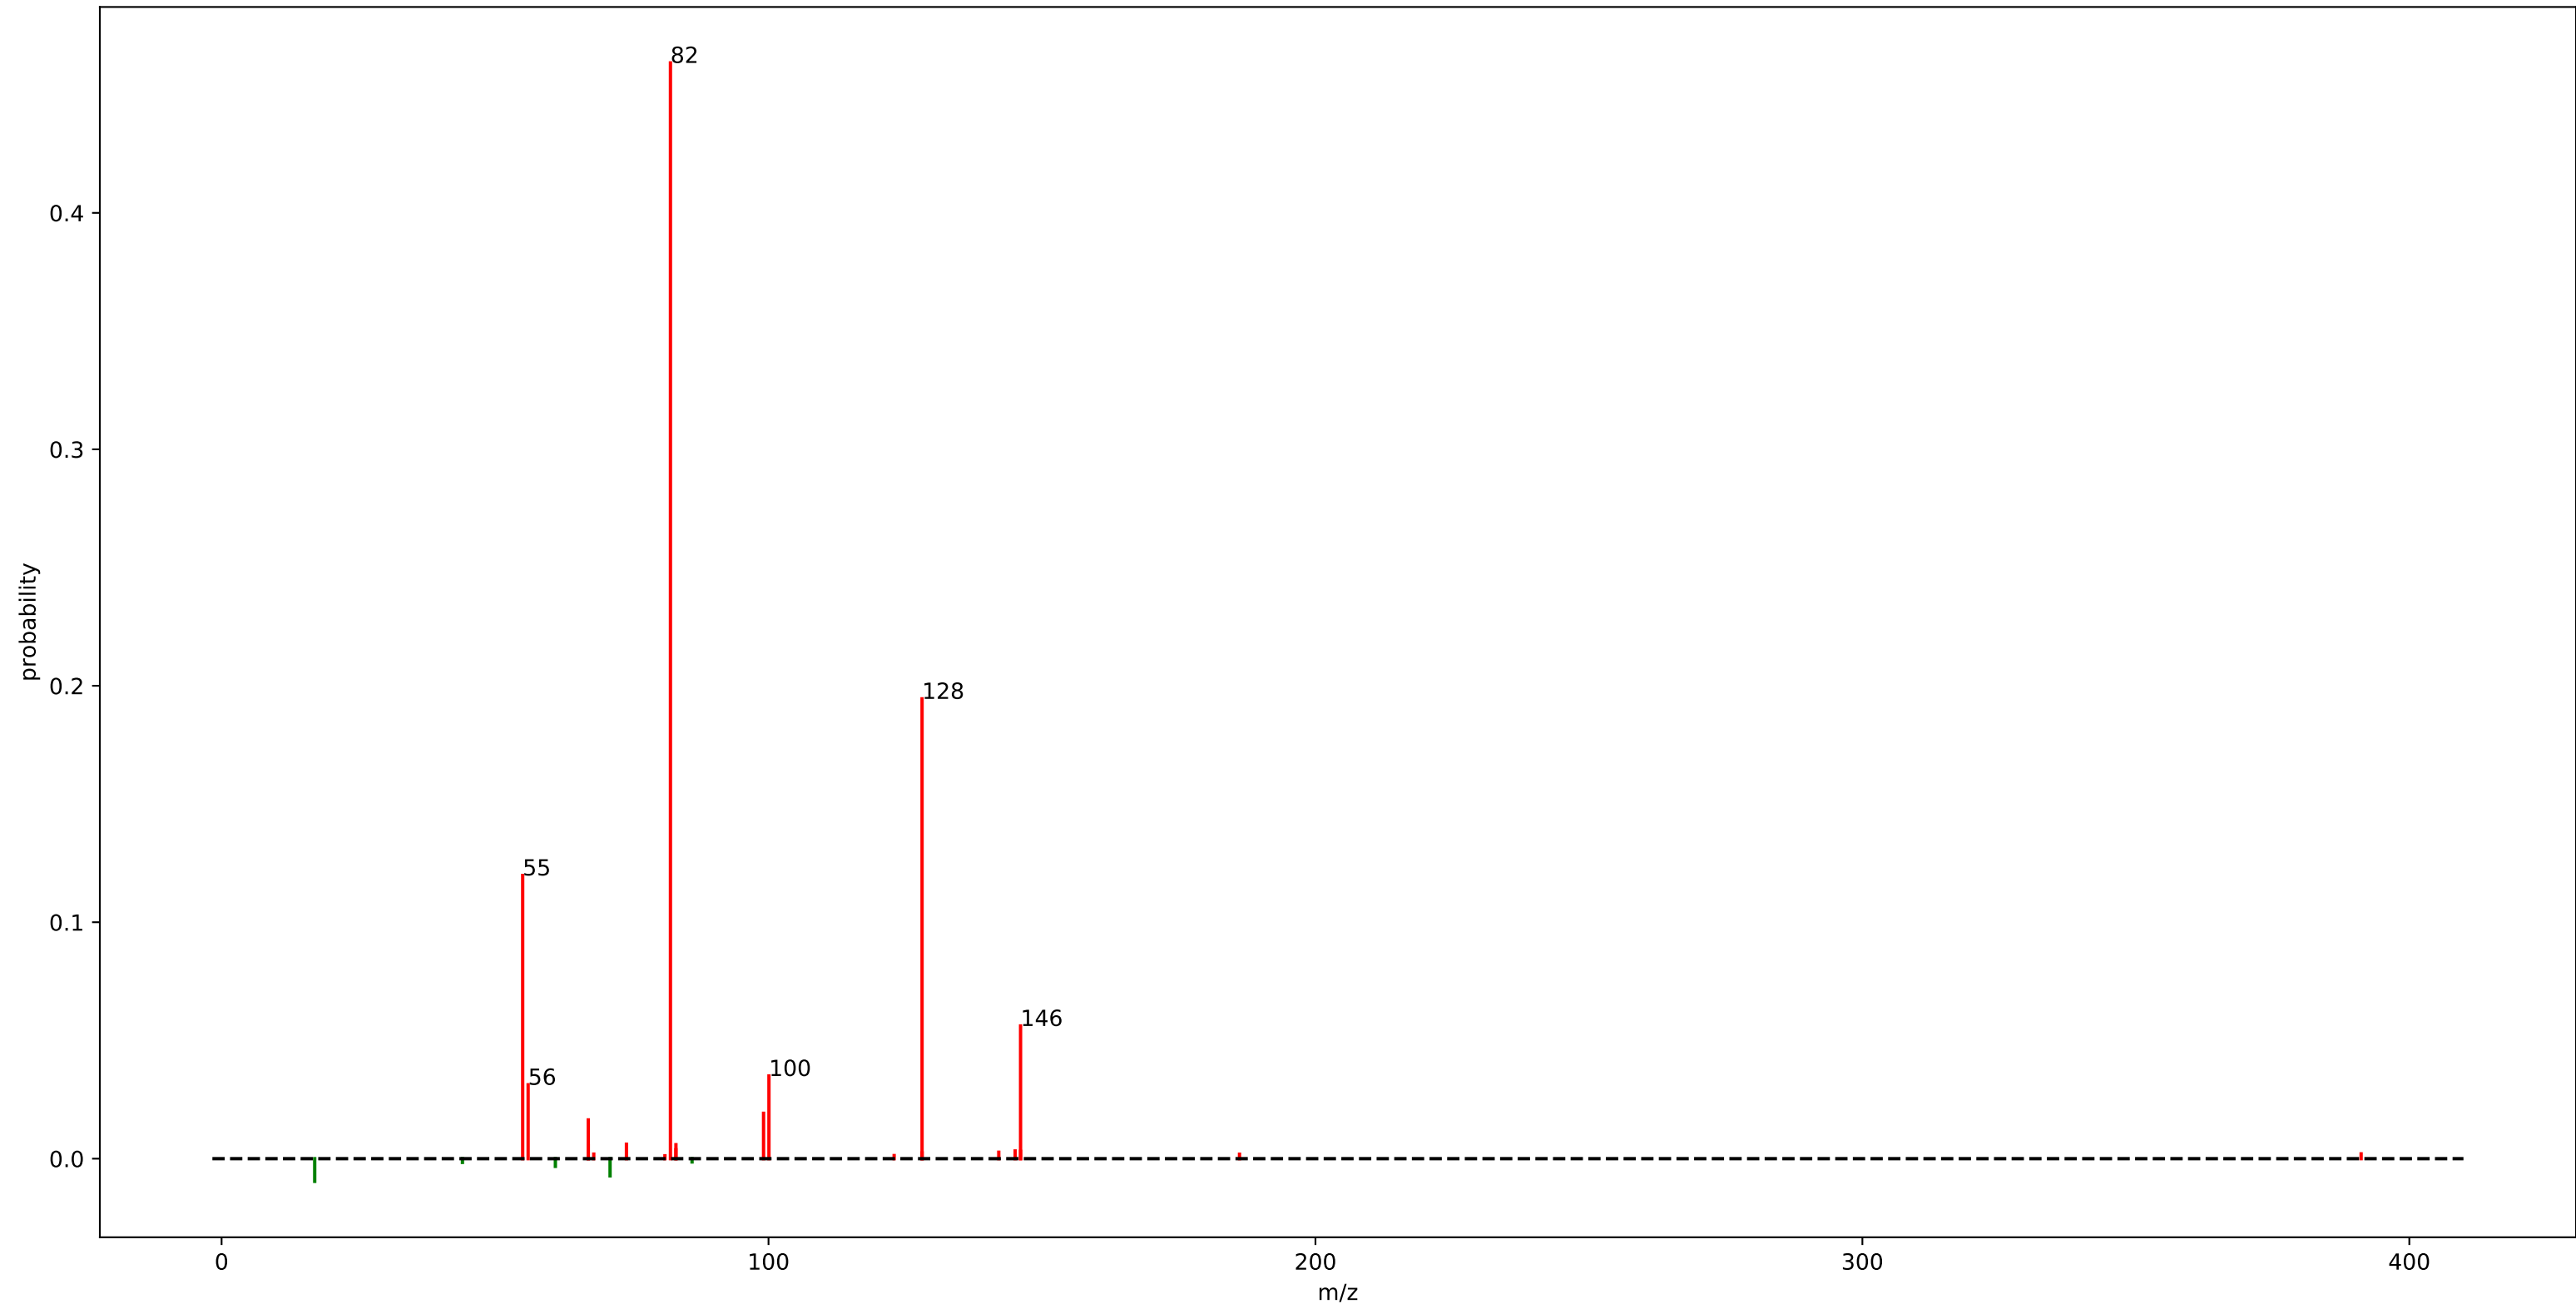

## urine\_mass2motif\_256.m2m

|                   |        |
|-------------------|--------|
| fragment_82.0675  | : 0.46 |
| fragment_128.0725 | : 0.19 |
| fragment_55.0525  | : 0.12 |
| fragment_146.0825 | : 0.06 |
| fragment_100.0775 | : 0.03 |
| fragment_56.0475  | : 0.03 |
| fragment_99.0925  | : 0.02 |
| fragment_67.0425  | : 0.02 |
| loss_17.0275      | : 0.01 |
| loss_71.0275      | : 0.01 |
| fragment_74.0225  | : 0.01 |
| fragment_83.0725  | : 0.01 |
| fragment_67.0525  | : 0.01 |

urine\_mass2motif\_167.m2m

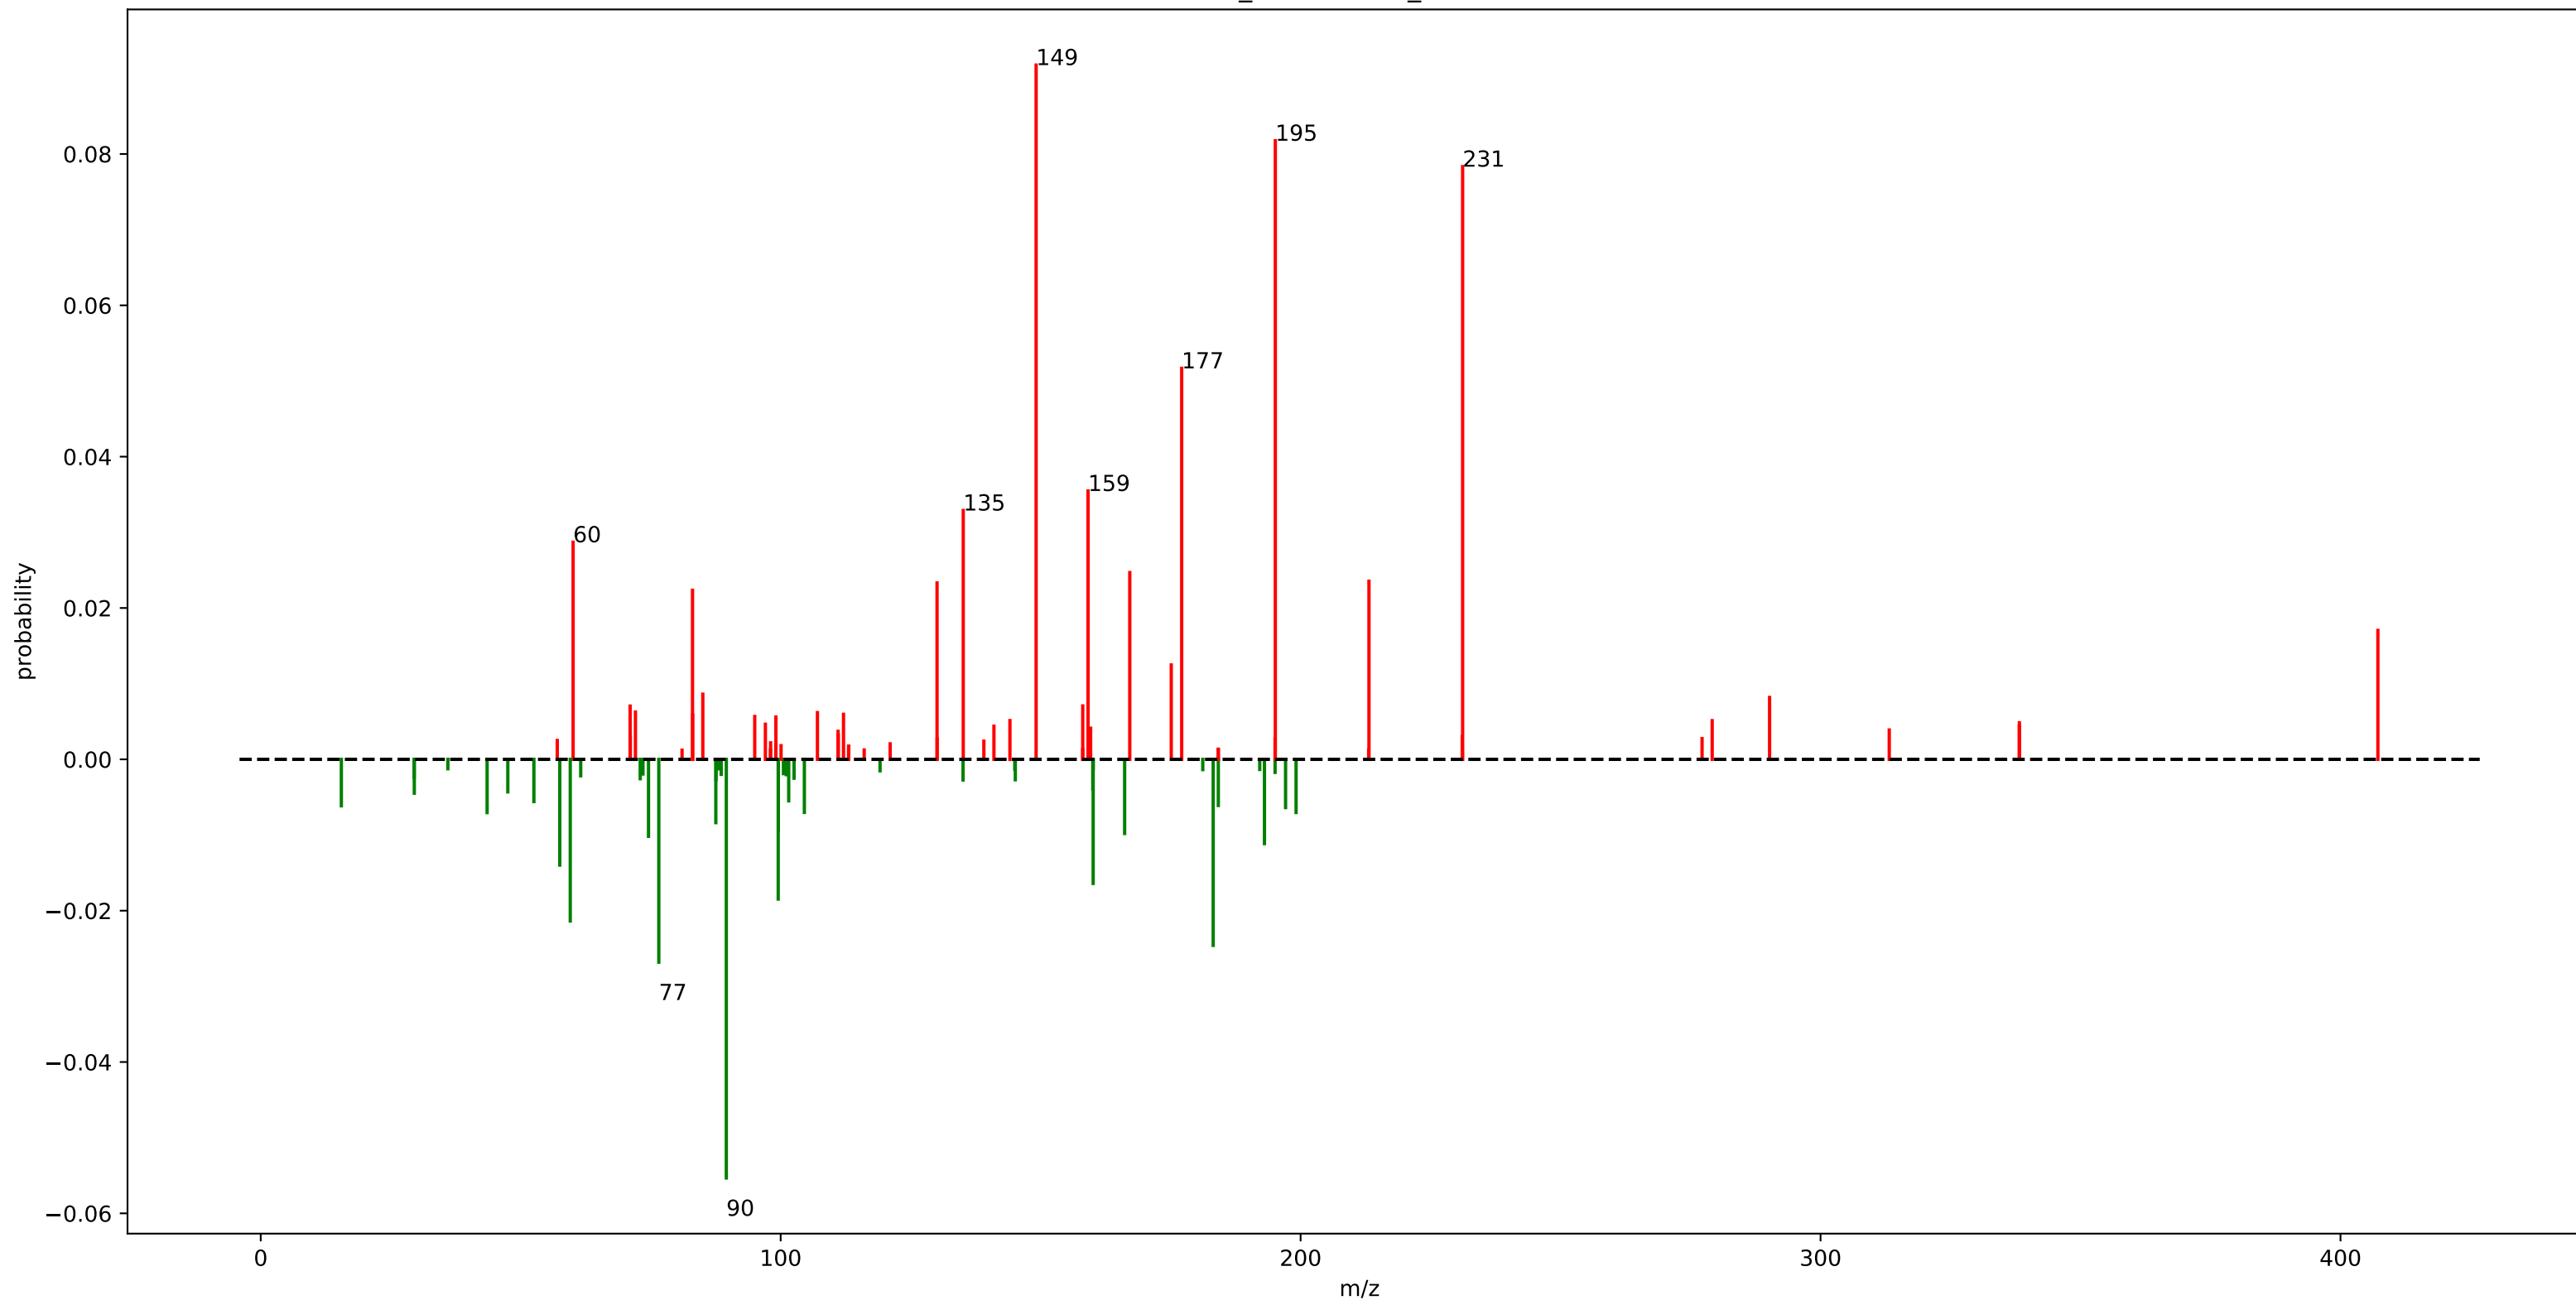

## urine\_mass2motif\_167.m2m

|                   |        |                   |        |                   |        |
|-------------------|--------|-------------------|--------|-------------------|--------|
| fragment_149.1325 | : 0.09 | loss_193.0475     | : 0.01 | fragment_99.0825  | : 0.01 |
| fragment_195.1375 | : 0.08 | loss_74.5825      | : 0.01 | loss_52.5375      | : 0.01 |
| fragment_231.1625 | : 0.08 | loss_166.1575     | : 0.01 | loss_101.5475     | : 0.01 |
| loss_89.5475      | : 0.06 | loss_99.5525      | : 0.01 | fragment_144.0925 | : 0.01 |
| fragment_177.1275 | : 0.05 | fragment_85.0275  | : 0.01 | fragment_279.1575 | : 0.01 |
| fragment_159.1175 | : 0.04 | loss_87.5275      | : 0.01 |                   |        |
| fragment_135.1175 | : 0.03 | fragment_290.1975 | : 0.01 |                   |        |
| fragment_60.0825  | : 0.03 | fragment_158.0975 | : 0.01 |                   |        |
| loss_76.5625      | : 0.03 | fragment_71.0475  | : 0.01 |                   |        |
| fragment_167.1425 | : 0.02 | loss_43.5425      | : 0.01 |                   |        |
| loss_183.1875     | : 0.02 | loss_199.1275     | : 0.01 |                   |        |
| fragment_213.1475 | : 0.02 | loss_104.5575     | : 0.01 |                   |        |
| fragment_130.0775 | : 0.02 | loss_197.1075     | : 0.01 |                   |        |
| fragment_83.0475  | : 0.02 | fragment_72.0725  | : 0.01 |                   |        |
| loss_59.5325      | : 0.02 | fragment_107.0725 | : 0.01 |                   |        |
| loss_99.5275      | : 0.02 | loss_15.5075      | : 0.01 |                   |        |
| fragment_407.1925 | : 0.02 | loss_184.1725     | : 0.01 |                   |        |
| loss_160.1025     | : 0.02 | fragment_112.0875 | : 0.01 |                   |        |
| loss_57.5175      | : 0.01 | fragment_83.0875  | : 0.01 |                   |        |
| fragment_175.1225 | : 0.01 | fragment_95.0125  | : 0.01 |                   |        |

motif\_529

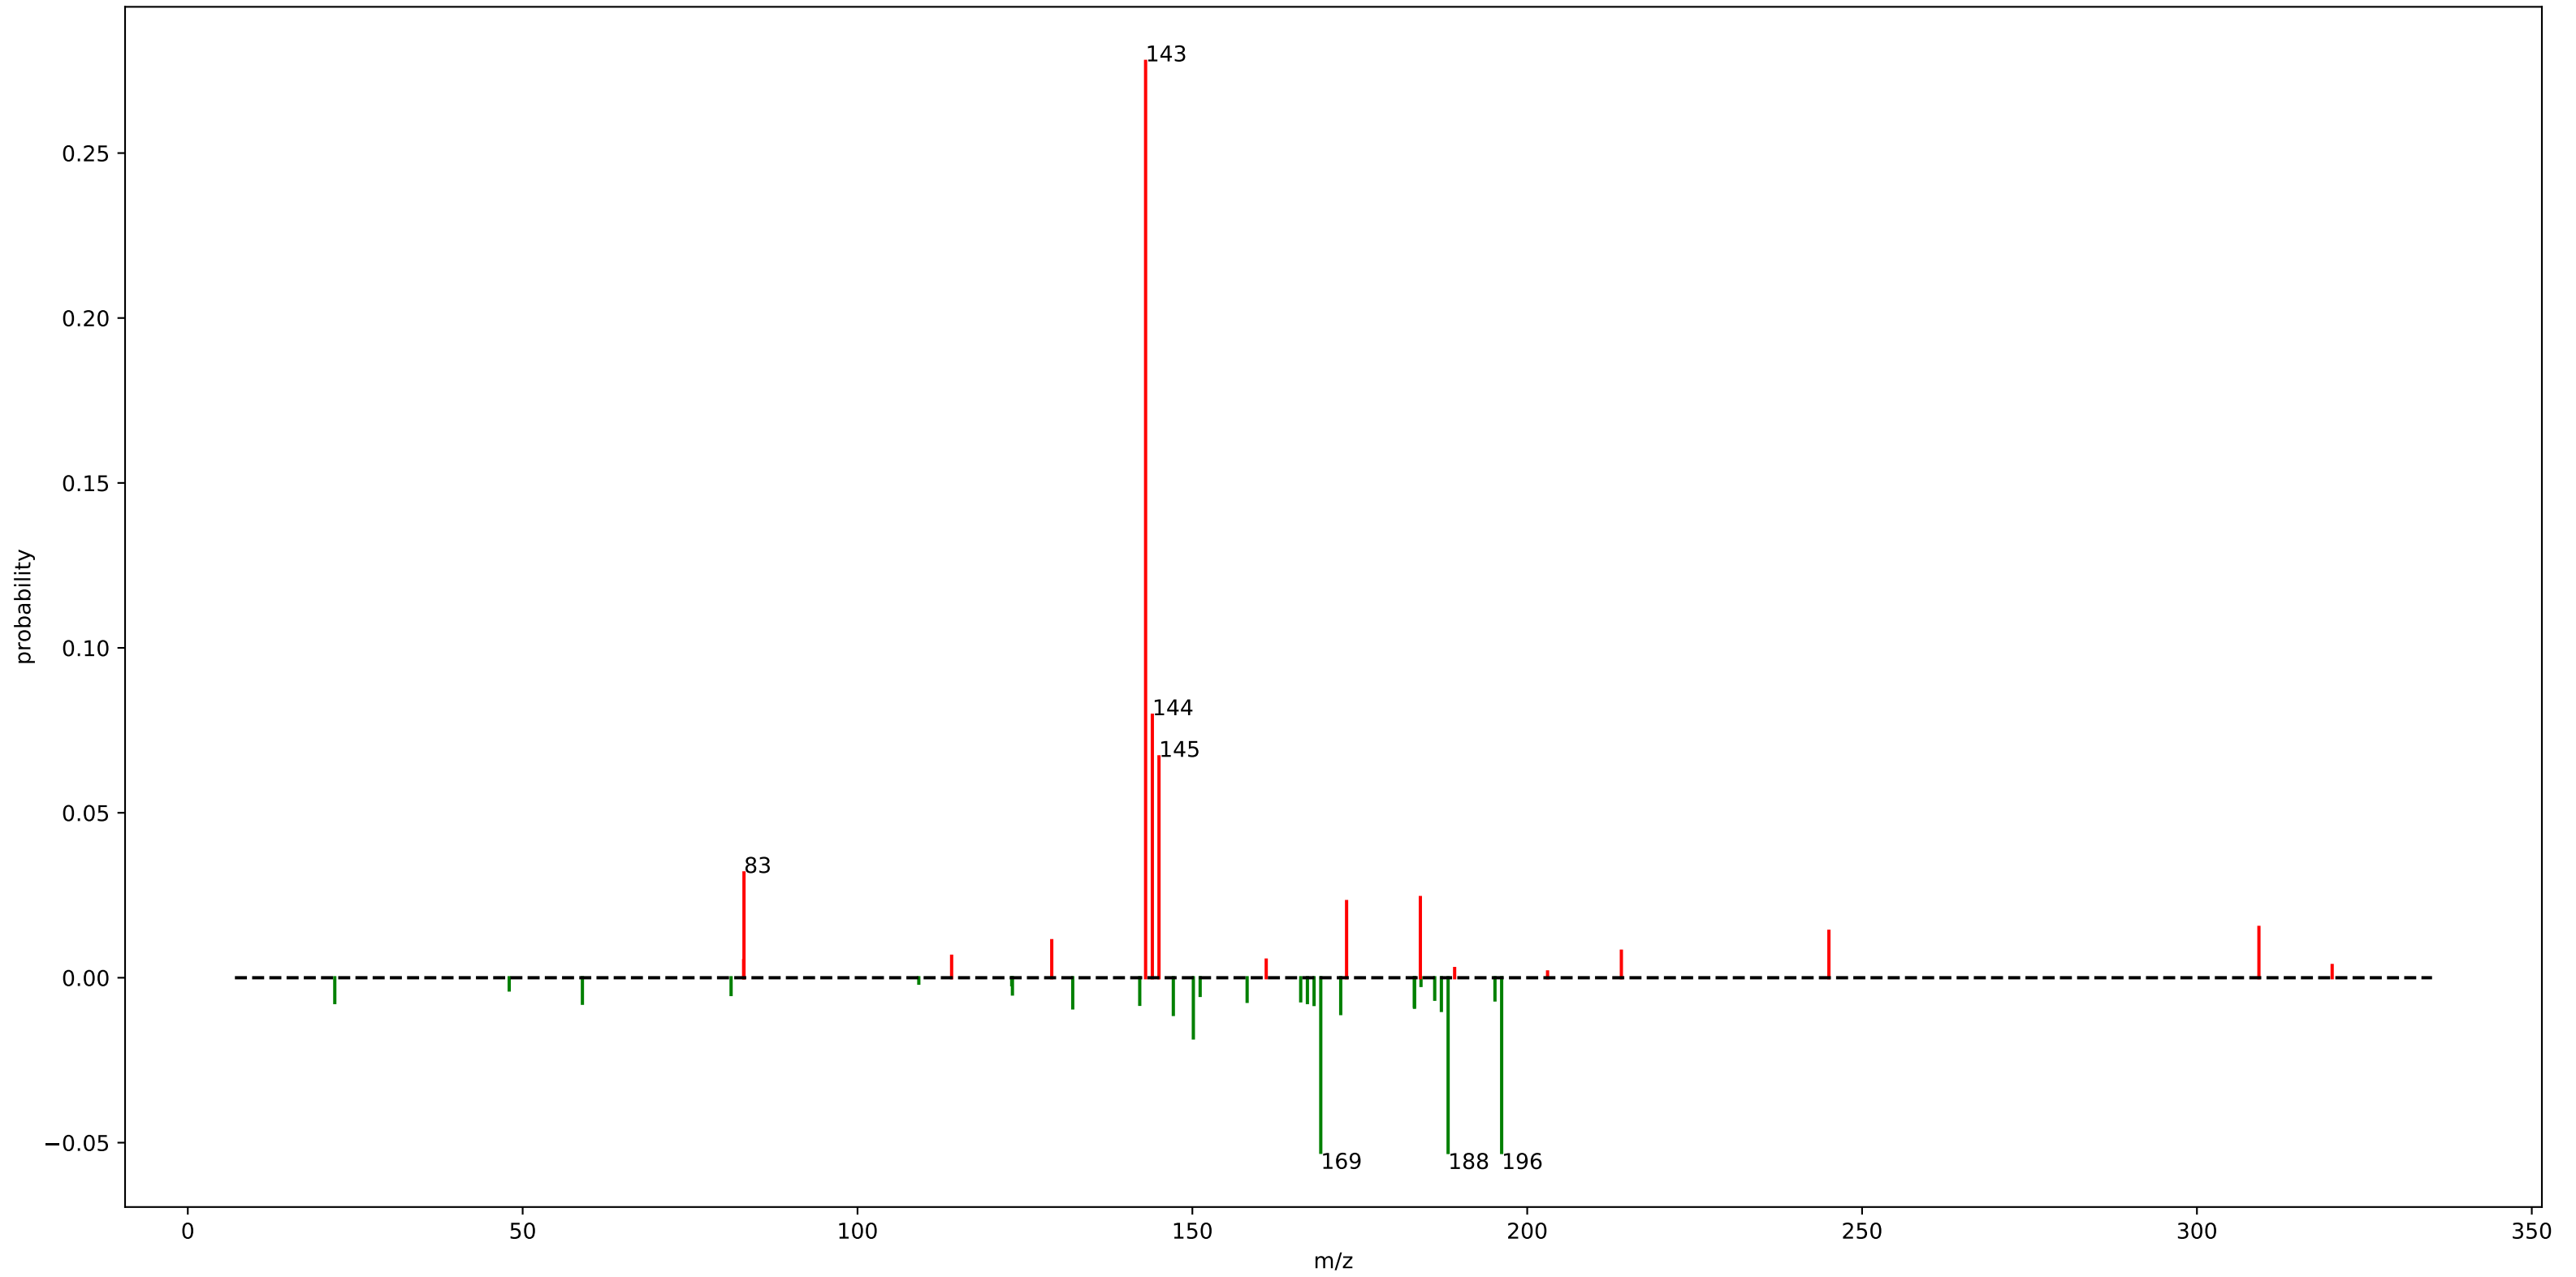

## motif\_529

|                   |        |                   |        |
|-------------------|--------|-------------------|--------|
| fragment_143.0175 | : 0.28 | fragment_214.0575 | : 0.01 |
| fragment_144.0225 | : 0.08 | loss_142.1425     | : 0.01 |
| fragment_145.0175 | : 0.07 | loss_58.9225      | : 0.01 |
| loss_188.1875     | : 0.05 | loss_21.9475      | : 0.01 |
| loss_196.1825     | : 0.05 | loss_167.1775     | : 0.01 |
| loss_169.1725     | : 0.05 | loss_158.1775     | : 0.01 |
| fragment_83.0475  | : 0.03 | loss_166.1775     | : 0.01 |
| fragment_184.0425 | : 0.02 | loss_195.1825     | : 0.01 |
| fragment_173.0275 | : 0.02 | loss_186.1875     | : 0.01 |
| loss_150.1475     | : 0.02 | fragment_114.0525 | : 0.01 |
| fragment_309.2575 | : 0.02 | fragment_161.0275 | : 0.01 |
| fragment_245.0475 | : 0.01 | loss_151.1625     | : 0.01 |
| fragment_129.0025 | : 0.01 | fragment_82.9975  | : 0.01 |
| loss_147.1575     | : 0.01 | loss_81.1225      | : 0.01 |
| loss_172.1525     | : 0.01 |                   |        |
| loss_187.1825     | : 0.01 |                   |        |
| loss_132.1375     | : 0.01 |                   |        |
| loss_183.1675     | : 0.01 |                   |        |
| loss_183.1525     | : 0.01 |                   |        |
| loss_168.1725     | : 0.01 |                   |        |



rhabdus\_motif\_163.m2m

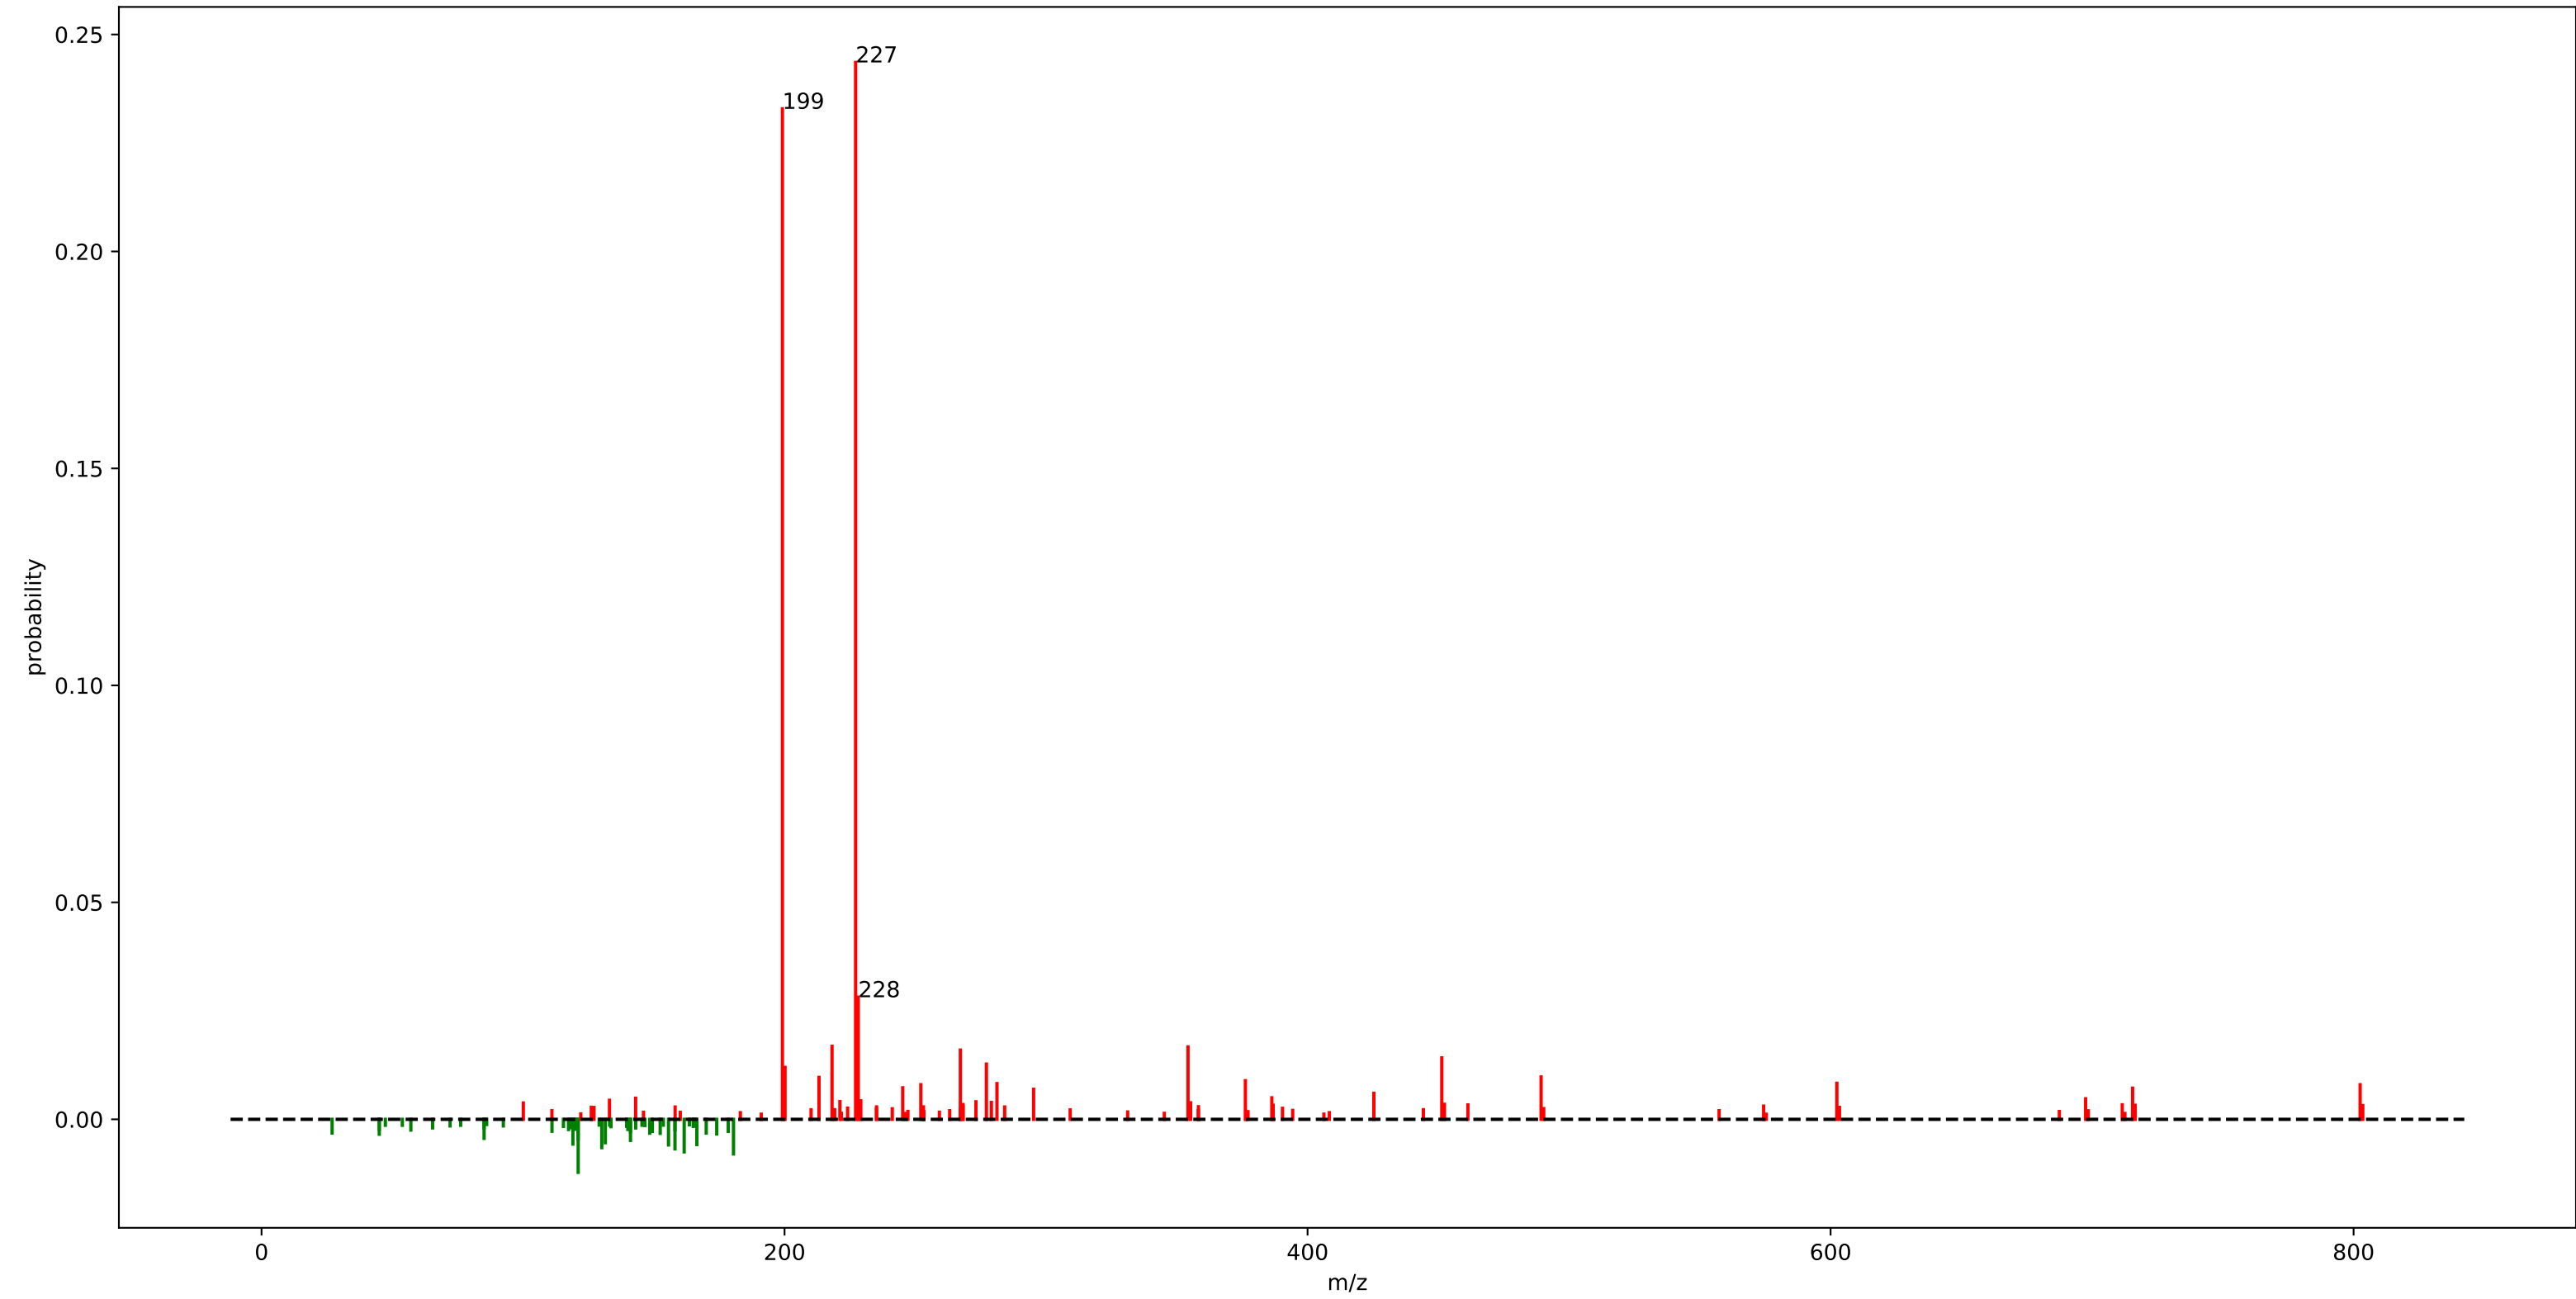

## rhabdus\_motif\_163.m2m

|                   |        |                   |        |
|-------------------|--------|-------------------|--------|
| fragment_227.1775 | : 0.24 | fragment_715.4775 | : 0.01 |
| fragment_199.1775 | : 0.23 | fragment_295.2375 | : 0.01 |
| fragment_228.1775 | : 0.03 | loss_158.1025     | : 0.01 |
| fragment_218.1525 | : 0.02 | loss_130.1075     | : 0.01 |
| fragment_354.2775 | : 0.02 | fragment_425.3475 | : 0.01 |
| fragment_267.2325 | : 0.02 | loss_155.6275     | : 0.01 |
| fragment_451.3275 | : 0.01 | loss_166.4625     | : 0.01 |
| fragment_277.1875 | : 0.01 | loss_119.0575     | : 0.01 |
| loss_121.0875     | : 0.01 | loss_131.4775     | : 0.01 |
| fragment_200.1825 | : 0.01 |                   |        |
| fragment_489.3075 | : 0.01 |                   |        |
| fragment_213.1725 | : 0.01 |                   |        |
| fragment_376.2225 | : 0.01 |                   |        |
| fragment_602.3925 | : 0.01 |                   |        |
| fragment_281.2225 | : 0.01 |                   |        |
| loss_180.4775     | : 0.01 |                   |        |
| fragment_252.1125 | : 0.01 |                   |        |
| fragment_802.5025 | : 0.01 |                   |        |
| loss_161.6175     | : 0.01 |                   |        |
| fragment_245.1825 | : 0.01 |                   |        |

motif\_441

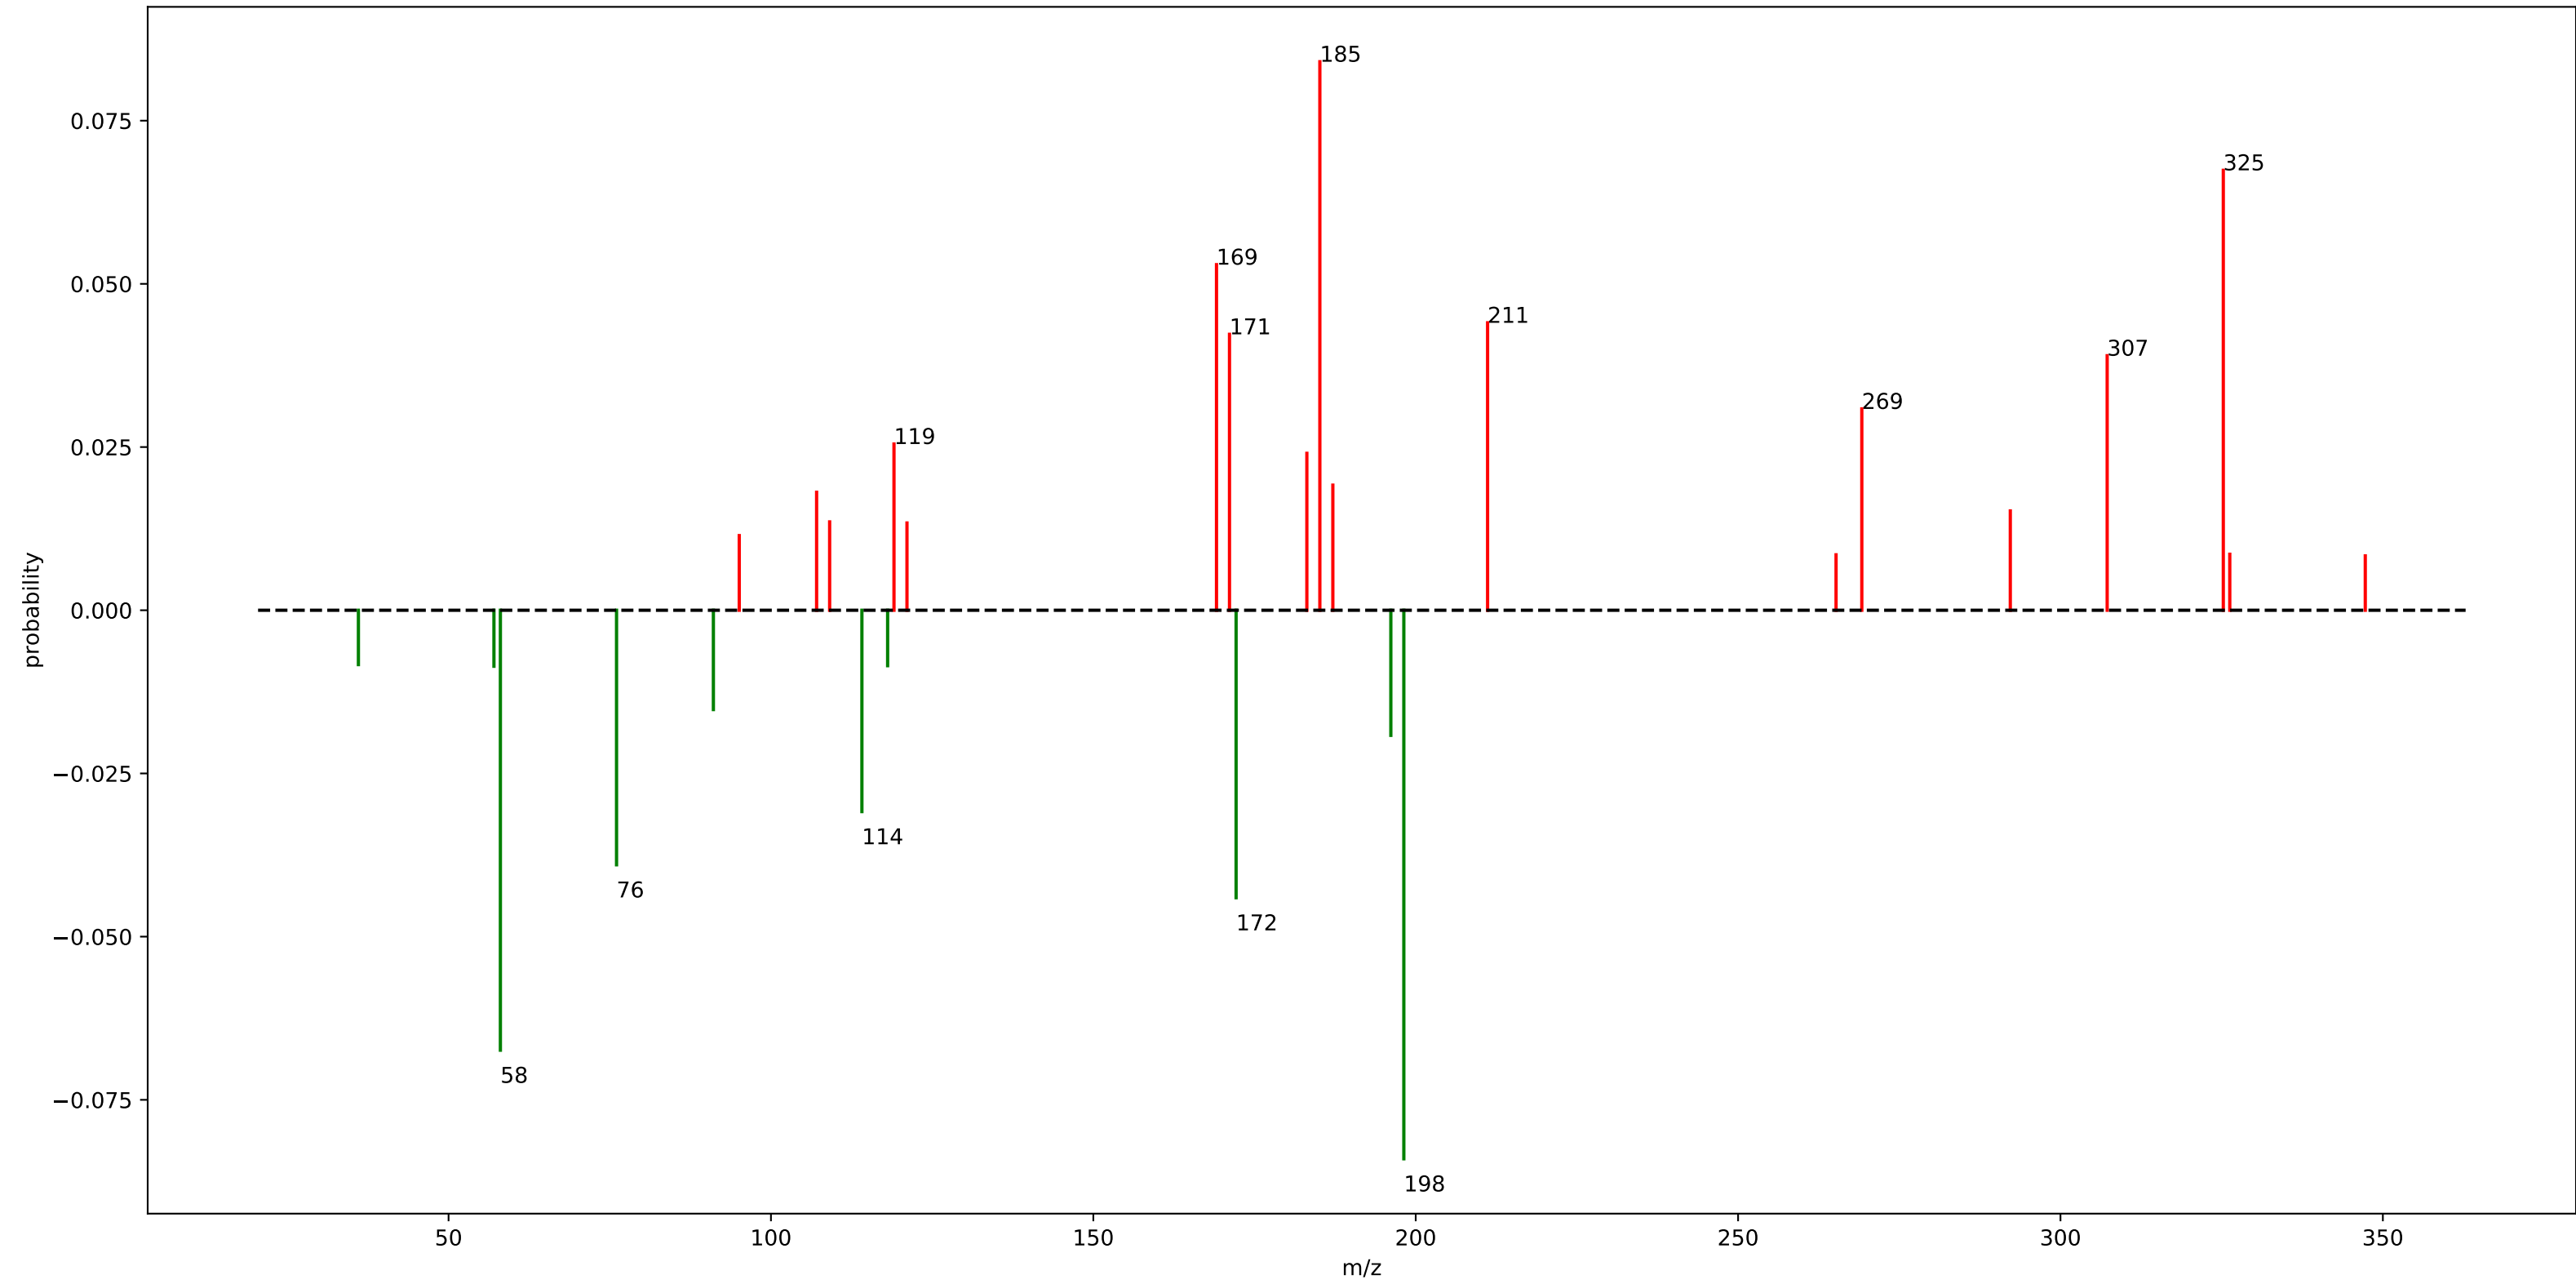

## motif\_441

|                   |        |                   |        |
|-------------------|--------|-------------------|--------|
| loss_198.1575     | : 0.08 | fragment_121.0975 | : 0.01 |
| fragment_185.1325 | : 0.08 | fragment_95.0825  | : 0.01 |
| fragment_325.2525 | : 0.07 | loss_57.0375      | : 0.01 |
| loss_58.0375      | : 0.07 | fragment_326.2575 | : 0.01 |
| fragment_169.1025 | : 0.05 | loss_118.0975     | : 0.01 |
| loss_172.1425     | : 0.04 | fragment_265.1925 | : 0.01 |
| fragment_211.1475 | : 0.04 | loss_36.0175      | : 0.01 |
| fragment_171.1175 | : 0.04 | fragment_347.2725 | : 0.01 |
| fragment_307.2425 | : 0.04 |                   |        |
| loss_76.0525      | : 0.04 |                   |        |
| fragment_269.1875 | : 0.03 |                   |        |
| loss_114.1075     | : 0.03 |                   |        |
| fragment_119.0825 | : 0.03 |                   |        |
| fragment_183.1175 | : 0.02 |                   |        |
| loss_196.1425     | : 0.02 |                   |        |
| fragment_187.1475 | : 0.02 |                   |        |
| fragment_107.0825 | : 0.02 |                   |        |
| fragment_292.2175 | : 0.02 |                   |        |
| loss_91.0725      | : 0.02 |                   |        |
| fragment_109.1025 | : 0.01 |                   |        |

rhamn\_motif\_40.m2m

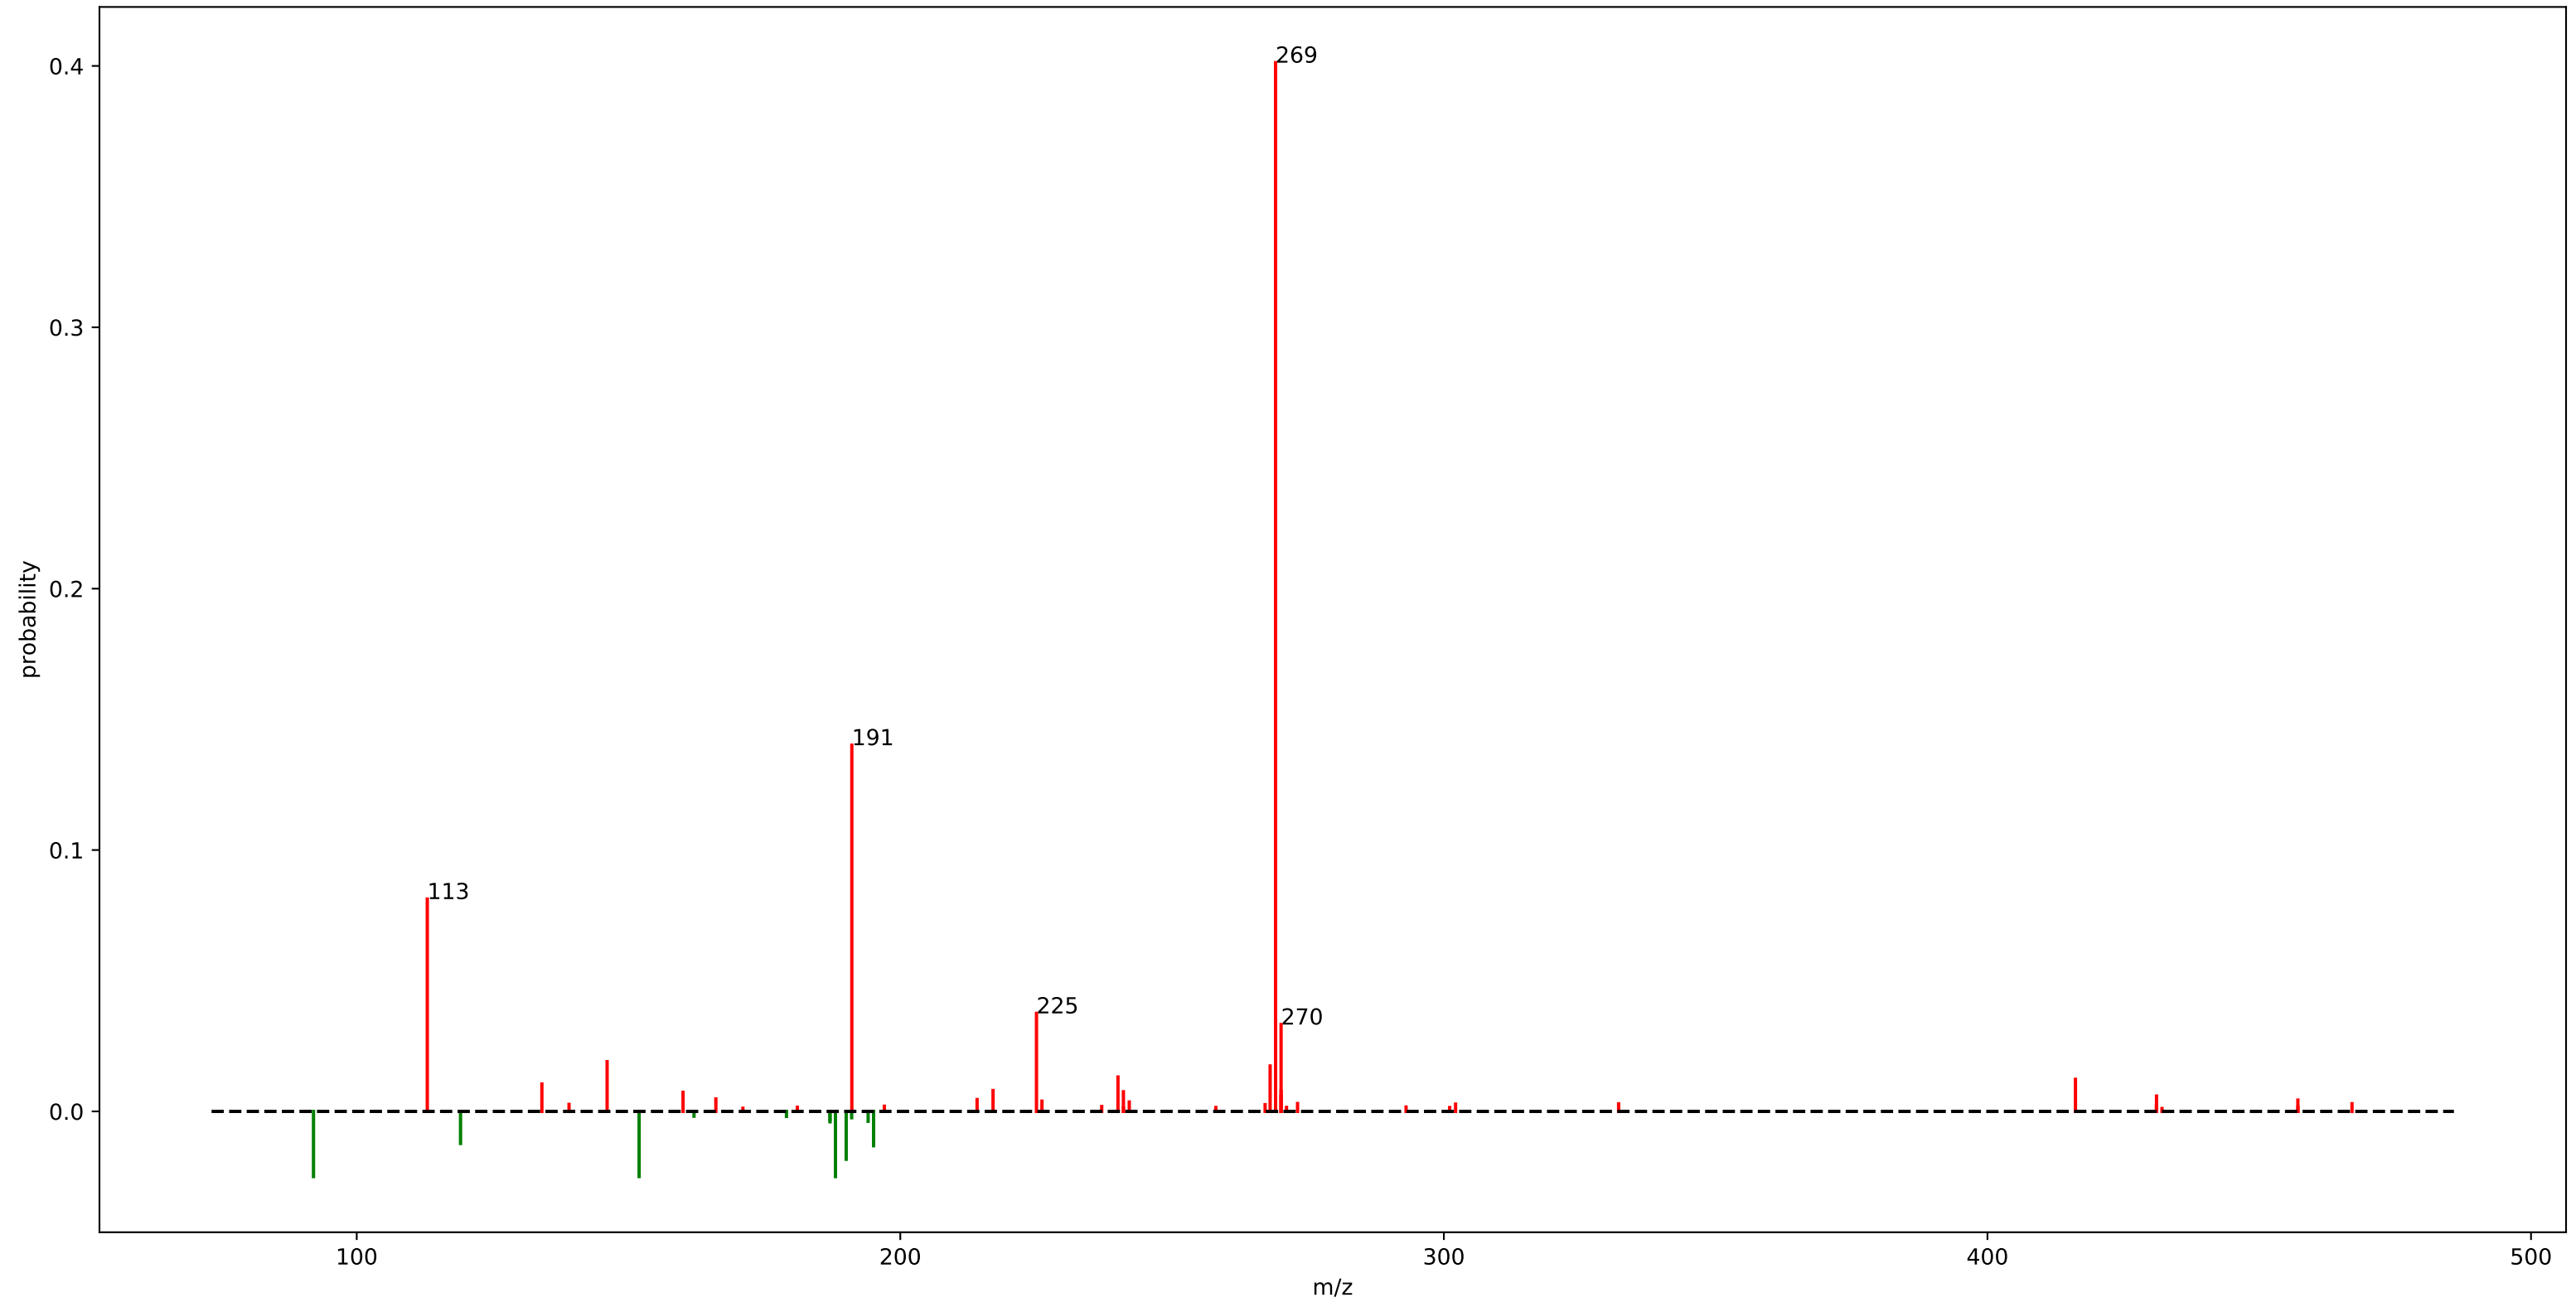

## rhamn\_motif\_40.m2m

|                   |        |                   |        |
|-------------------|--------|-------------------|--------|
| fragment_269.0425 | : 0.40 | fragment_431.1025 | : 0.01 |
| fragment_191.0825 | : 0.14 | fragment_270.0425 | : 0.01 |
| fragment_112.9825 | : 0.08 |                   |        |
| fragment_225.0525 | : 0.04 |                   |        |
| fragment_270.0475 | : 0.03 |                   |        |
| loss_151.9525     | : 0.02 |                   |        |
| loss_92.0475      | : 0.02 |                   |        |
| loss_188.0725     | : 0.02 |                   |        |
| fragment_146.0625 | : 0.02 |                   |        |
| loss_190.0475     | : 0.02 |                   |        |
| fragment_268.0375 | : 0.02 |                   |        |
| fragment_240.0425 | : 0.01 |                   |        |
| loss_195.0875     | : 0.01 |                   |        |
| fragment_416.1925 | : 0.01 |                   |        |
| loss_119.0975     | : 0.01 |                   |        |
| fragment_134.0625 | : 0.01 |                   |        |
| fragment_217.0625 | : 0.01 |                   |        |
| fragment_270.0525 | : 0.01 |                   |        |
| fragment_241.0475 | : 0.01 |                   |        |
| fragment_160.0325 | : 0.01 |                   |        |

urine\_mass2motif\_261.m2m

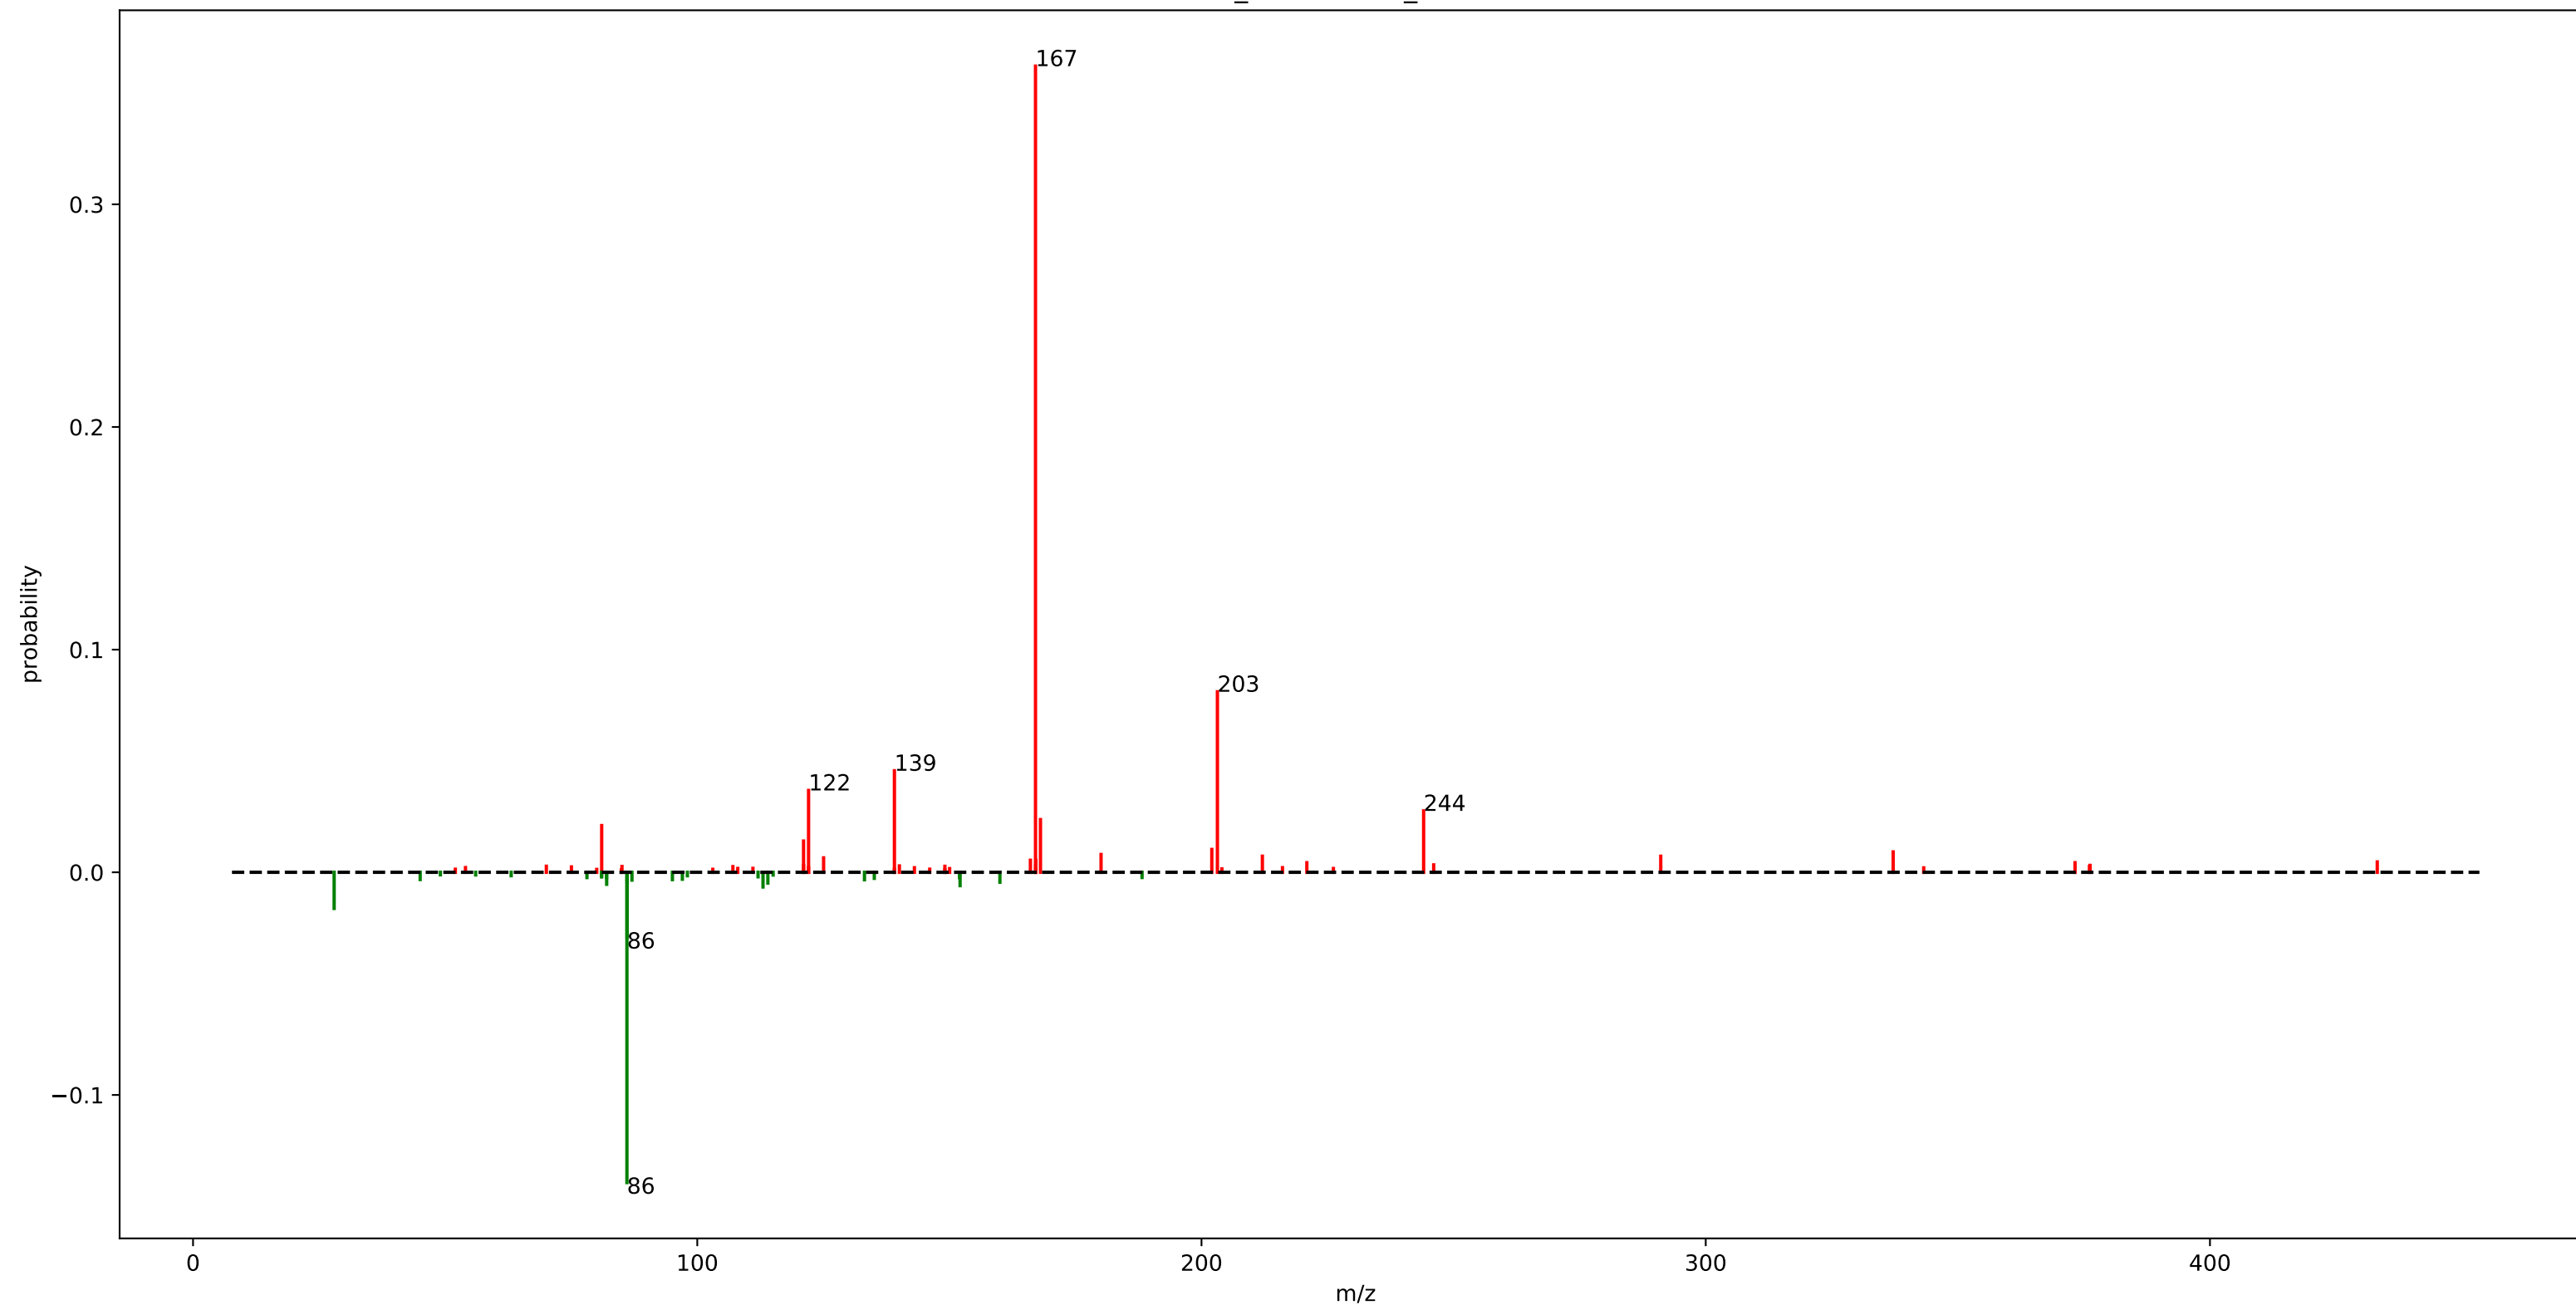

# urine\_mass2motif\_261.m2m

|                   |        |                   |        |
|-------------------|--------|-------------------|--------|
| fragment_167.0775 | : 0.36 | fragment_167.1525 | : 0.01 |
| loss_86.0475      | : 0.14 | loss_82.0325      | : 0.01 |
| fragment_203.1525 | : 0.08 |                   |        |
| fragment_139.0975 | : 0.05 |                   |        |
| fragment_122.0725 | : 0.04 |                   |        |
| loss_86.0725      | : 0.03 |                   |        |
| fragment_244.0525 | : 0.03 |                   |        |
| fragment_168.0625 | : 0.02 |                   |        |
| fragment_81.0425  | : 0.02 |                   |        |
| loss_27.9825      | : 0.02 |                   |        |
| fragment_121.0775 | : 0.01 |                   |        |
| fragment_202.0425 | : 0.01 |                   |        |
| fragment_337.1725 | : 0.01 |                   |        |
| fragment_180.0775 | : 0.01 |                   |        |
| fragment_212.0725 | : 0.01 |                   |        |
| fragment_291.0775 | : 0.01 |                   |        |
| loss_113.0375     | : 0.01 |                   |        |
| fragment_125.0525 | : 0.01 |                   |        |
| loss_152.1175     | : 0.01 |                   |        |
| fragment_166.0675 | : 0.01 |                   |        |



motif\_443

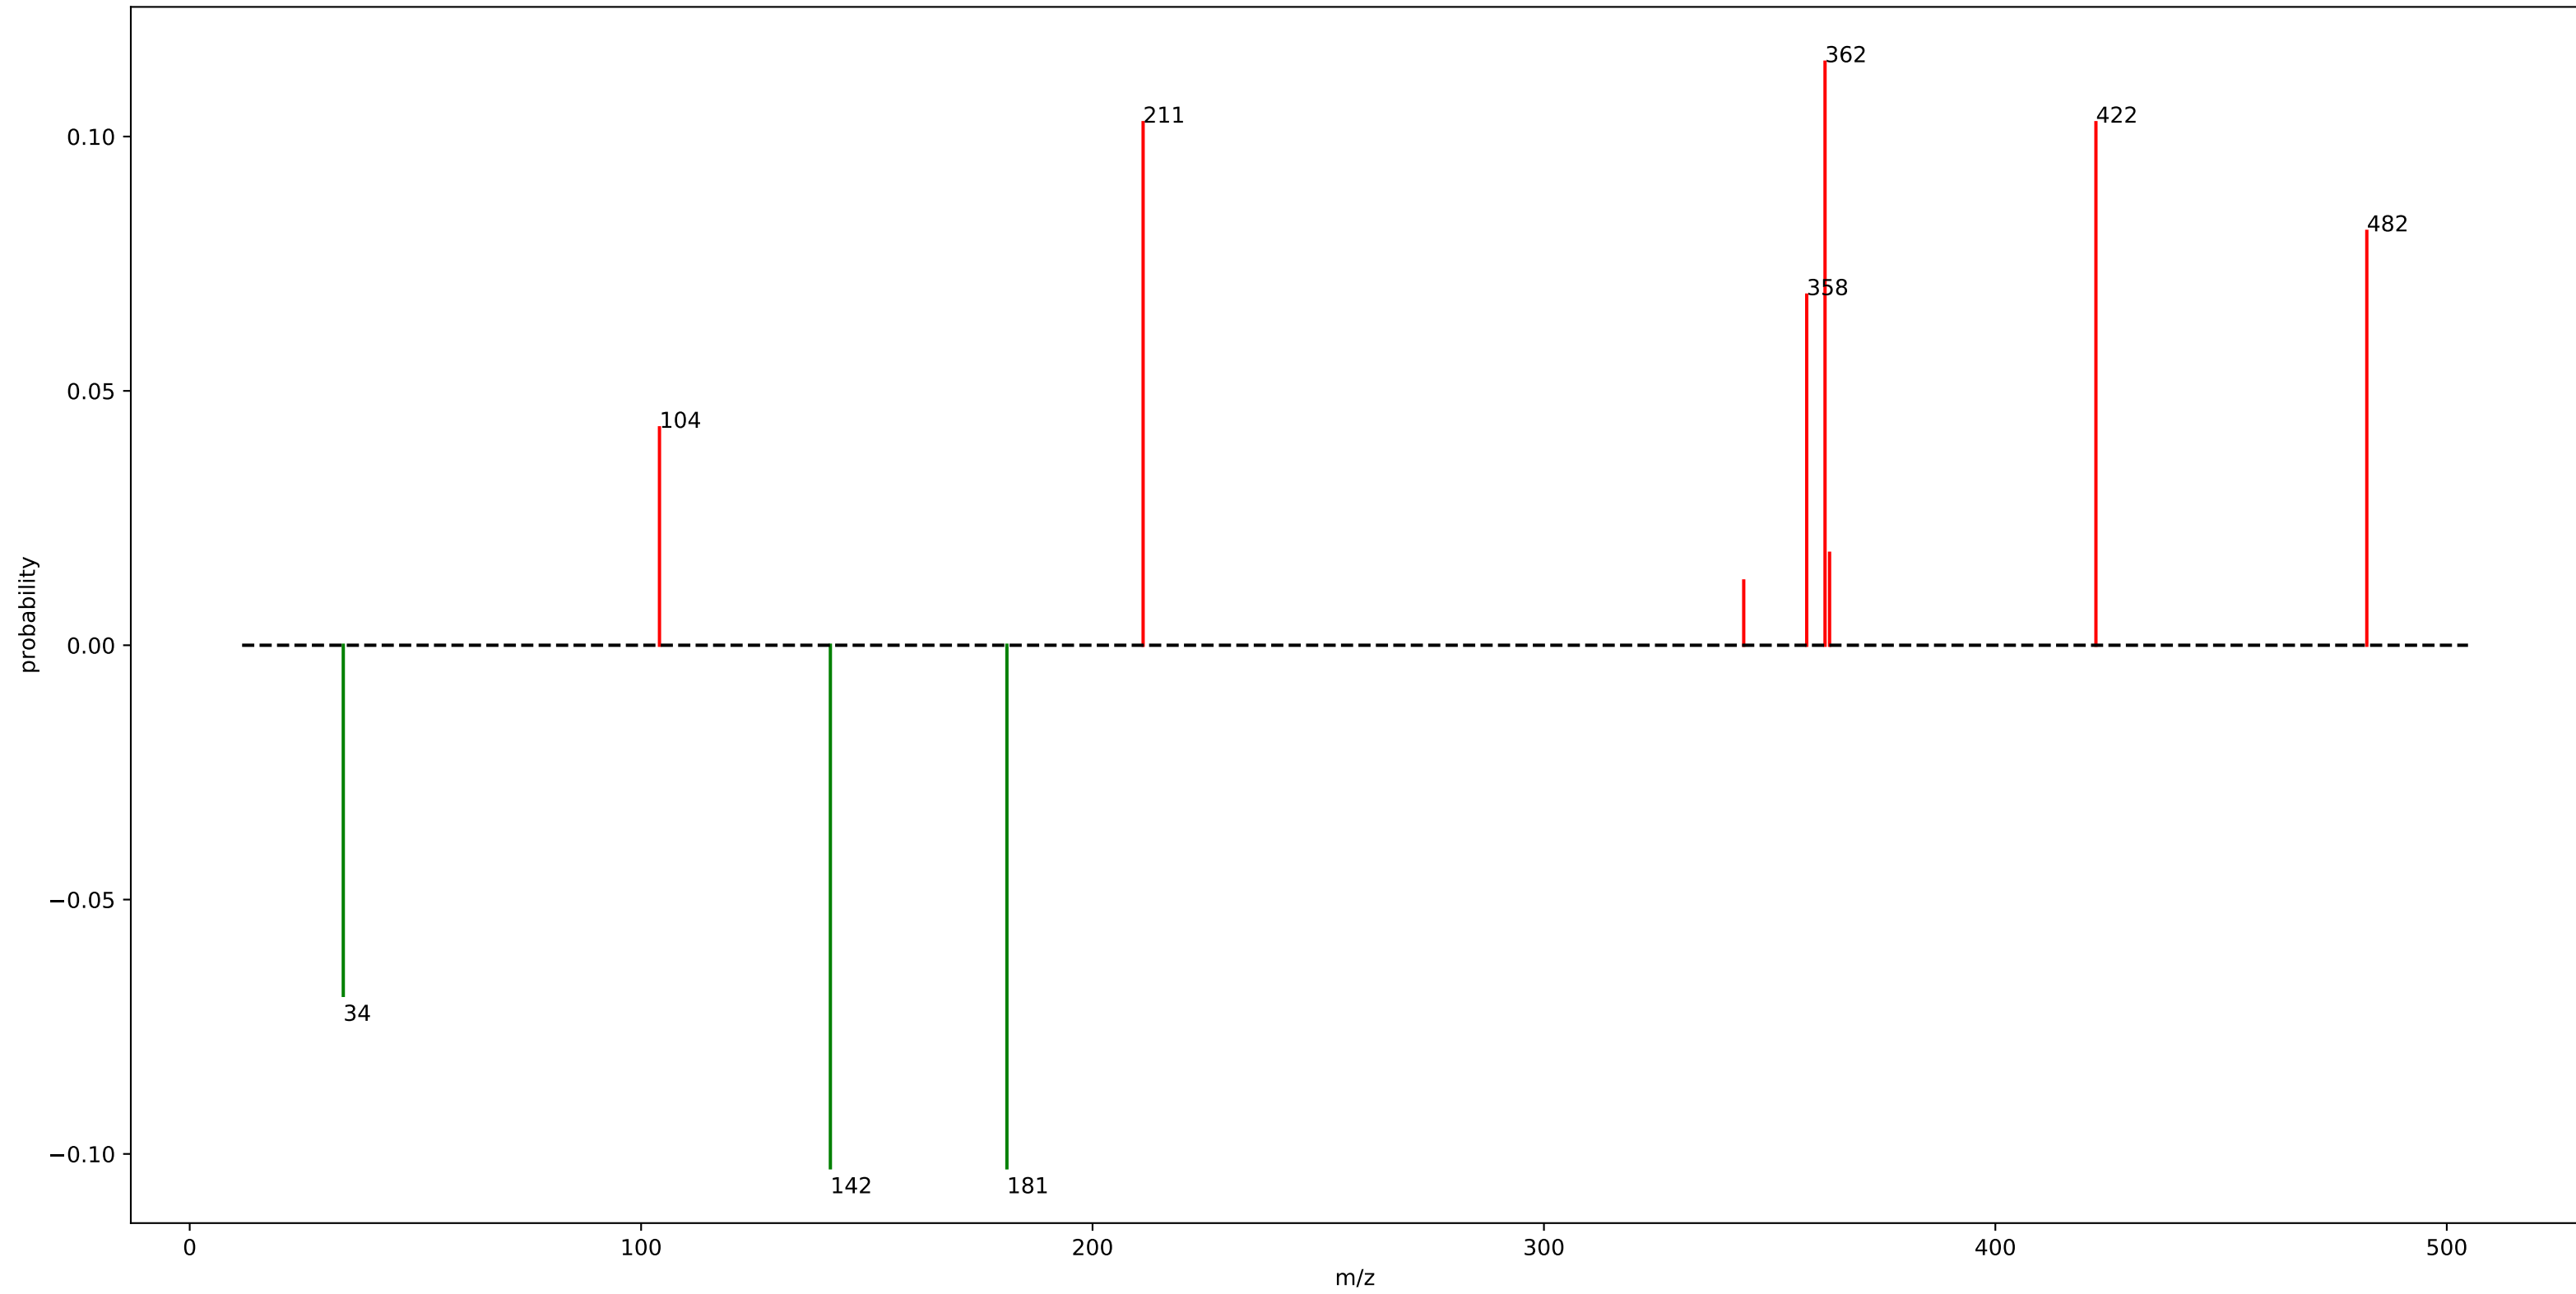

## motif\_443

|                   |        |
|-------------------|--------|
| fragment_362.2675 | : 0.11 |
| loss_181.0325     | : 0.10 |
| fragment_211.2075 | : 0.10 |
| loss_141.9275     | : 0.10 |
| fragment_422.2775 | : 0.10 |
| fragment_482.2875 | : 0.08 |
| loss_34.0225      | : 0.07 |
| fragment_358.2125 | : 0.07 |
| fragment_104.0675 | : 0.04 |
| fragment_363.2725 | : 0.02 |
| fragment_344.2575 | : 0.01 |

rhamn\_motif\_109.m2m

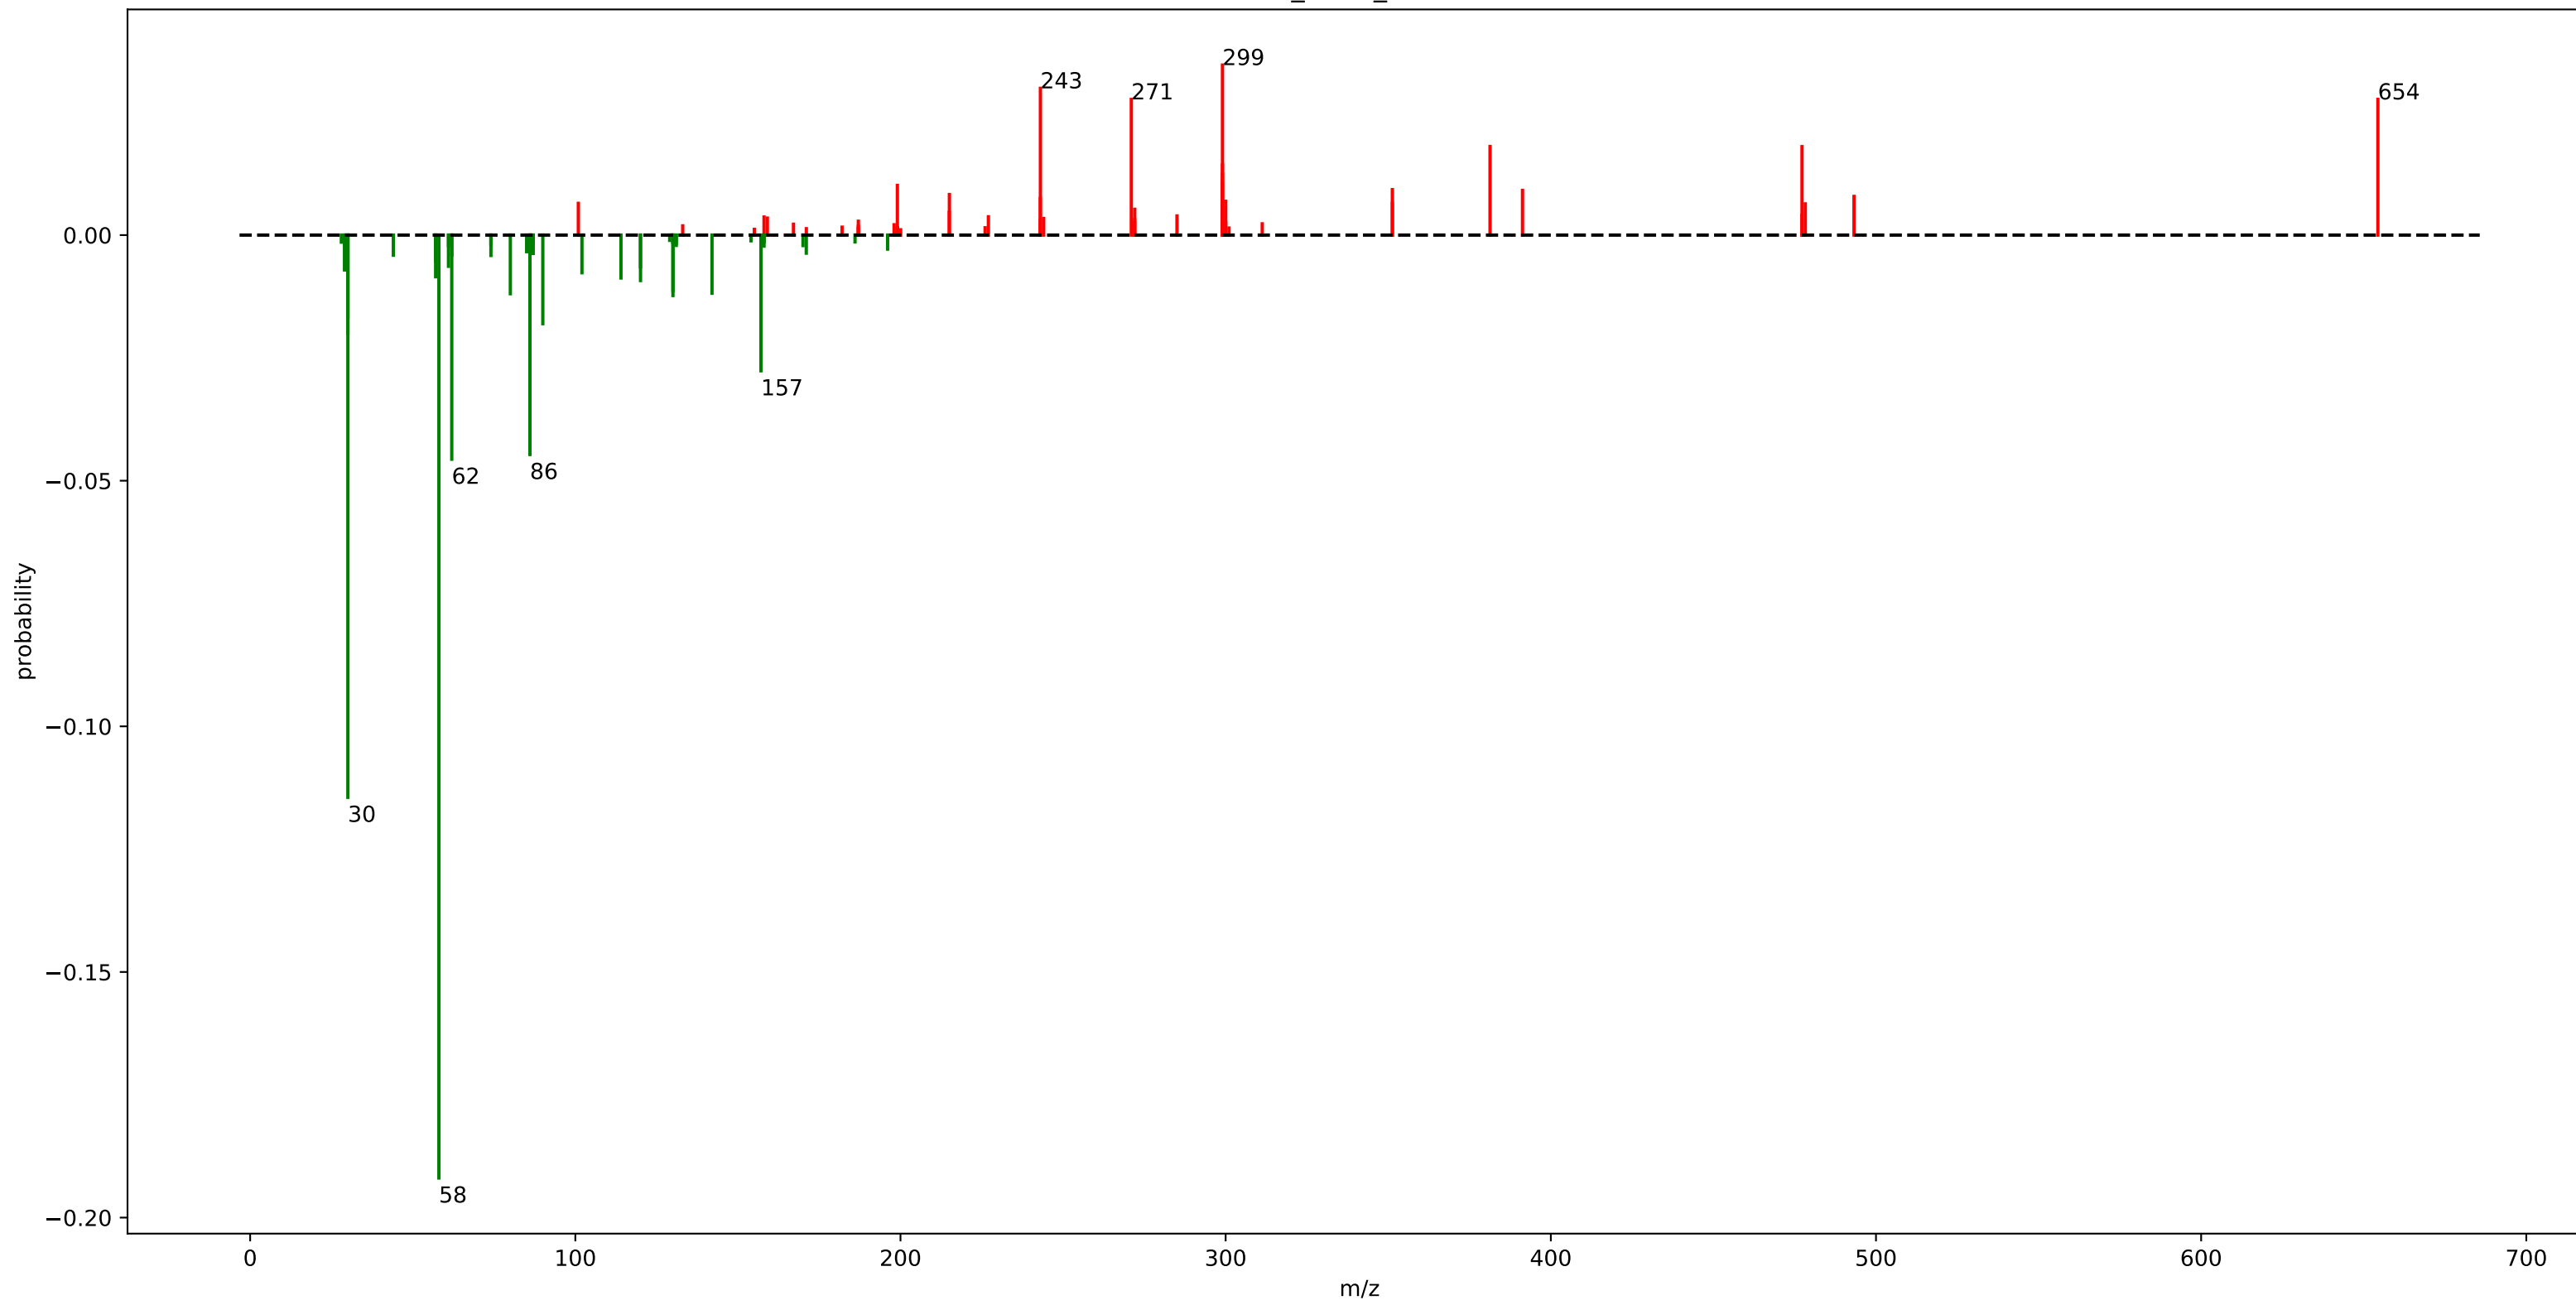

# rhamn\_motif\_109.m2m

|                   |        |                   |        |                   |        |
|-------------------|--------|-------------------|--------|-------------------|--------|
| loss_58.0425      | : 0.19 | fragment_298.9875 | : 0.01 | fragment_272.0375 | : 0.01 |
| loss_30.0475      | : 0.11 | fragment_199.0425 | : 0.01 | loss_86.0325      | : 0.01 |
| loss_61.9975      | : 0.05 | loss_120.0475     | : 0.01 |                   |        |
| loss_86.0375      | : 0.04 | fragment_351.2625 | : 0.01 |                   |        |
| fragment_299.0225 | : 0.03 | fragment_391.2975 | : 0.01 |                   |        |
| fragment_243.0275 | : 0.03 | loss_114.0325     | : 0.01 |                   |        |
| loss_157.0875     | : 0.03 | loss_57.0425      | : 0.01 |                   |        |
| fragment_270.9875 | : 0.03 | fragment_215.0375 | : 0.01 |                   |        |
| fragment_654.3575 | : 0.03 | fragment_493.2425 | : 0.01 |                   |        |
| loss_30.0425      | : 0.02 | loss_102.0325     | : 0.01 |                   |        |
| loss_90.0025      | : 0.02 | fragment_242.9925 | : 0.01 |                   |        |
| fragment_381.3075 | : 0.02 | loss_29.0425      | : 0.01 |                   |        |
| fragment_477.2525 | : 0.02 | loss_29.0475      | : 0.01 |                   |        |
| loss_30.0525      | : 0.02 | fragment_300.0175 | : 0.01 |                   |        |
| fragment_299.0175 | : 0.01 | loss_120.0325     | : 0.01 |                   |        |
| fragment_299.0125 | : 0.01 | fragment_351.2775 | : 0.01 |                   |        |
| loss_130.0225     | : 0.01 | fragment_100.9275 | : 0.01 |                   |        |
| loss_80.0125      | : 0.01 | fragment_478.2575 | : 0.01 |                   |        |
| loss_142.0275     | : 0.01 | loss_60.9925      | : 0.01 |                   |        |
| loss_130.0275     | : 0.01 | loss_57.0325      | : 0.01 |                   |        |

motif\_597

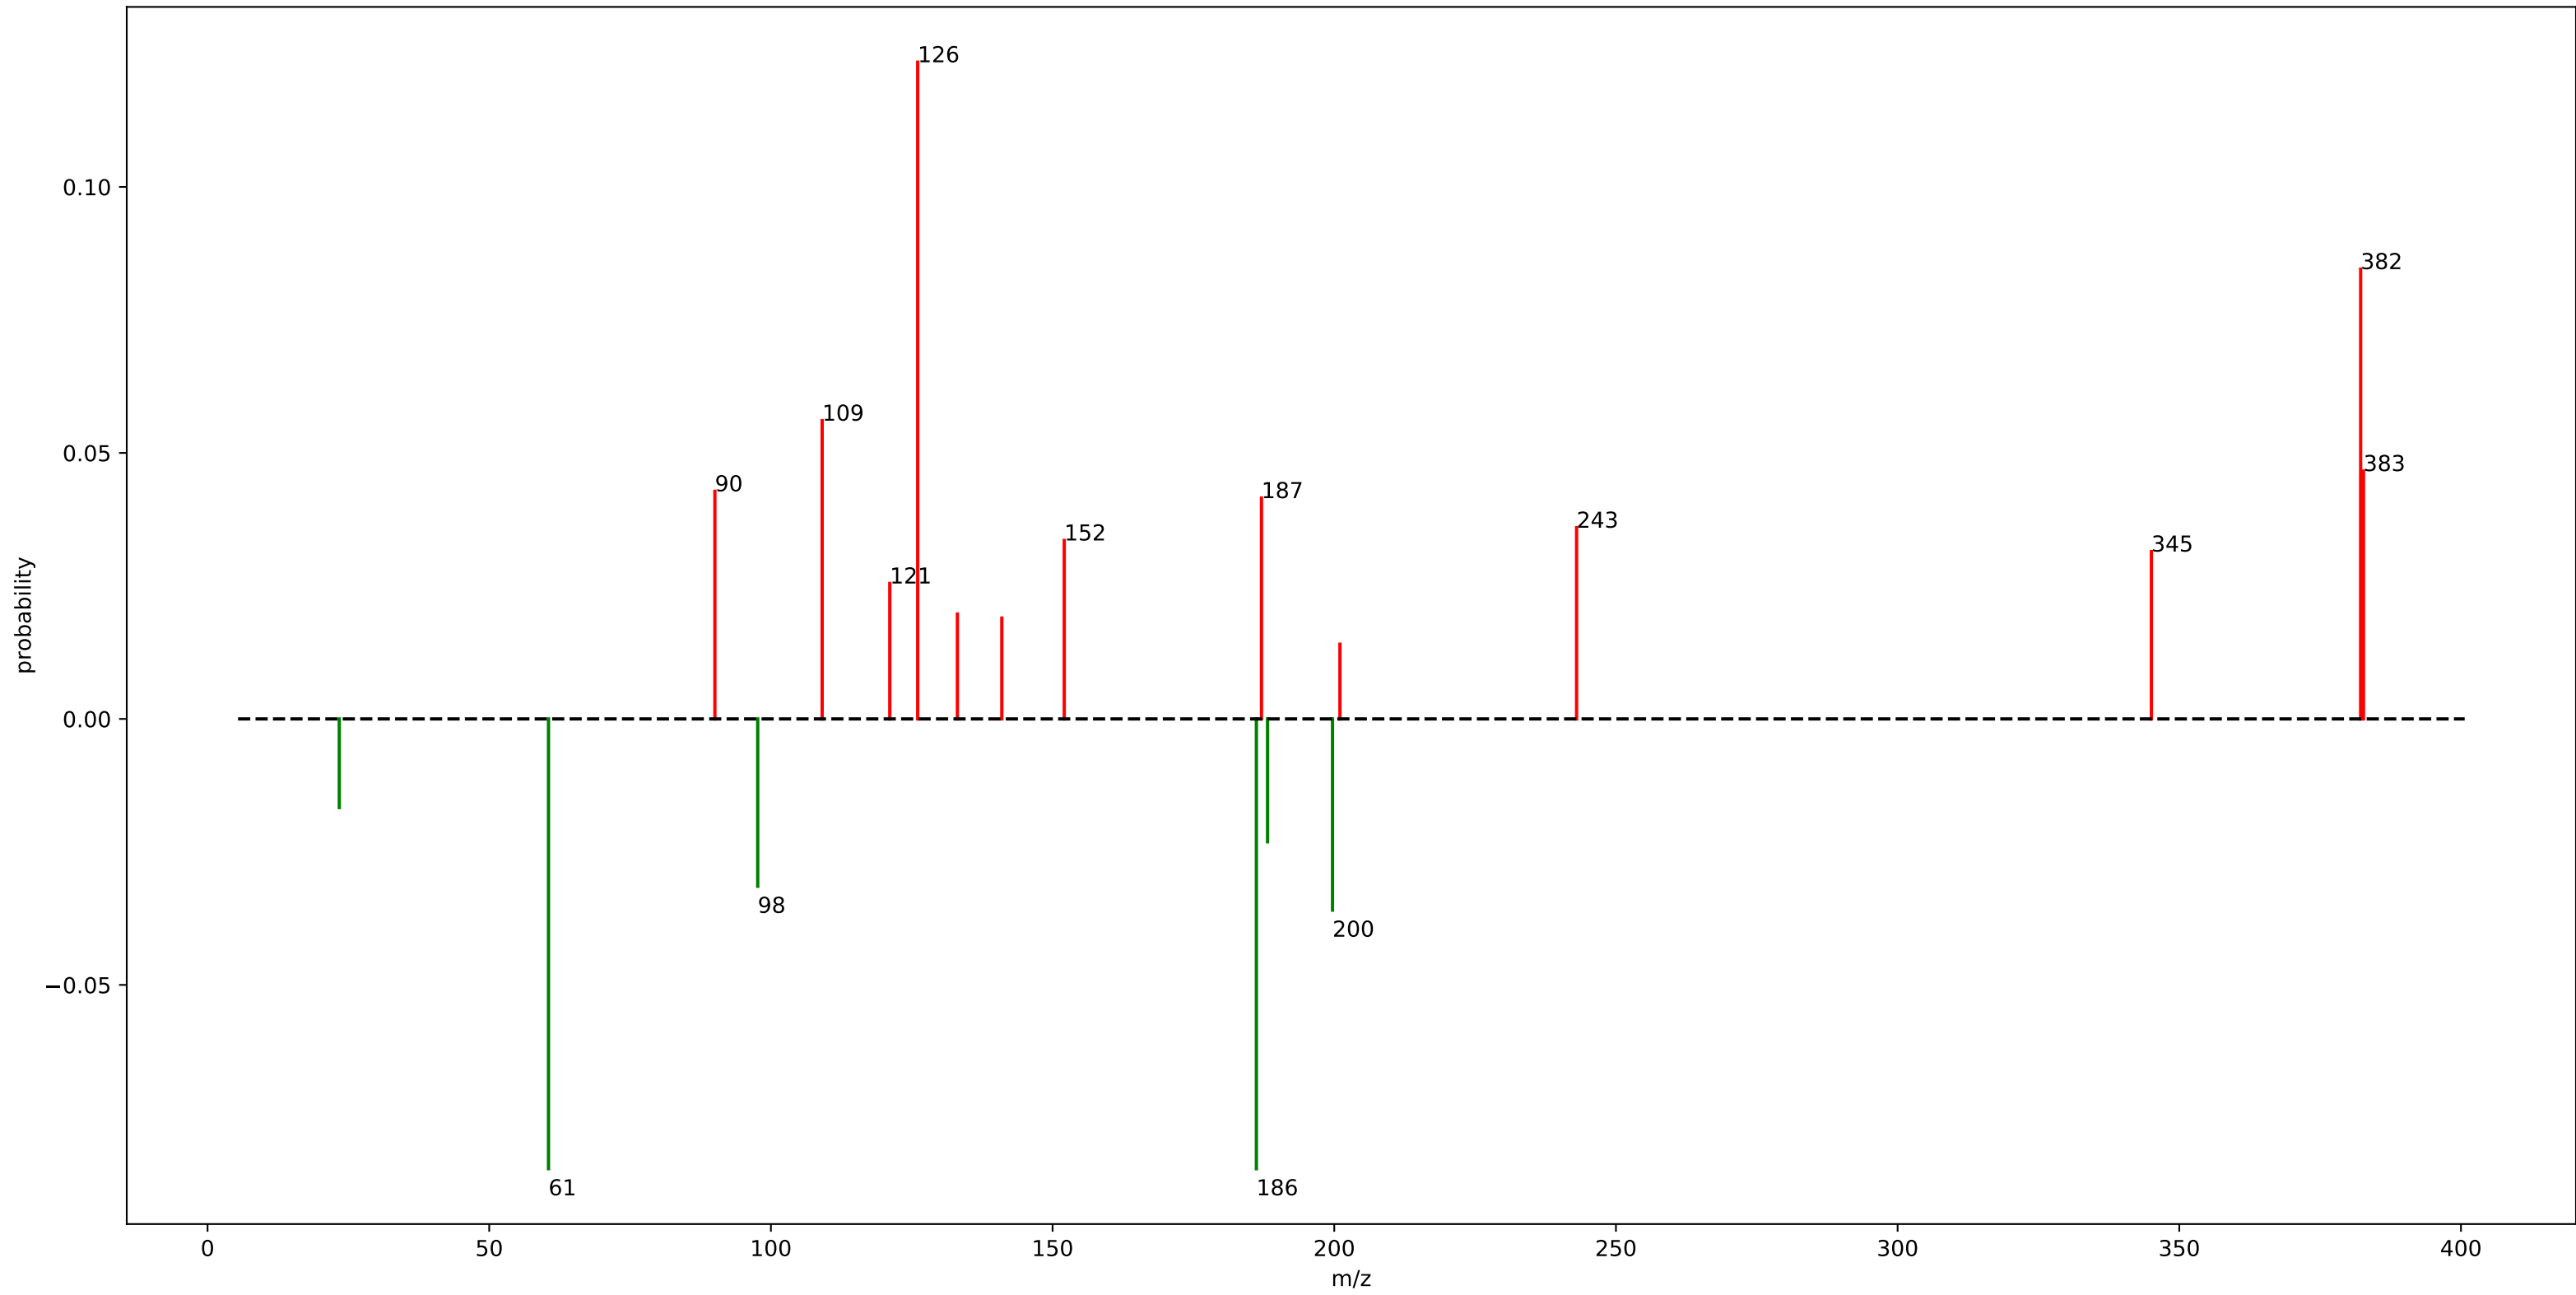

## motif\_597

|                   |        |
|-------------------|--------|
| fragment_126.0575 | : 0.12 |
| fragment_382.1925 | : 0.08 |
| loss_60.5225      | : 0.08 |
| loss_186.1775     | : 0.08 |
| fragment_109.0975 | : 0.06 |
| fragment_382.6925 | : 0.05 |
| fragment_90.0575  | : 0.04 |
| fragment_187.0825 | : 0.04 |
| loss_199.6925     | : 0.04 |
| fragment_243.0175 | : 0.04 |
| fragment_152.0725 | : 0.03 |
| loss_97.6625      | : 0.03 |
| fragment_345.0475 | : 0.03 |
| fragment_121.1025 | : 0.03 |
| loss_188.1575     | : 0.02 |
| fragment_133.1025 | : 0.02 |
| fragment_140.9875 | : 0.02 |
| loss_23.3825      | : 0.02 |
| fragment_201.0075 | : 0.01 |

motif\_522

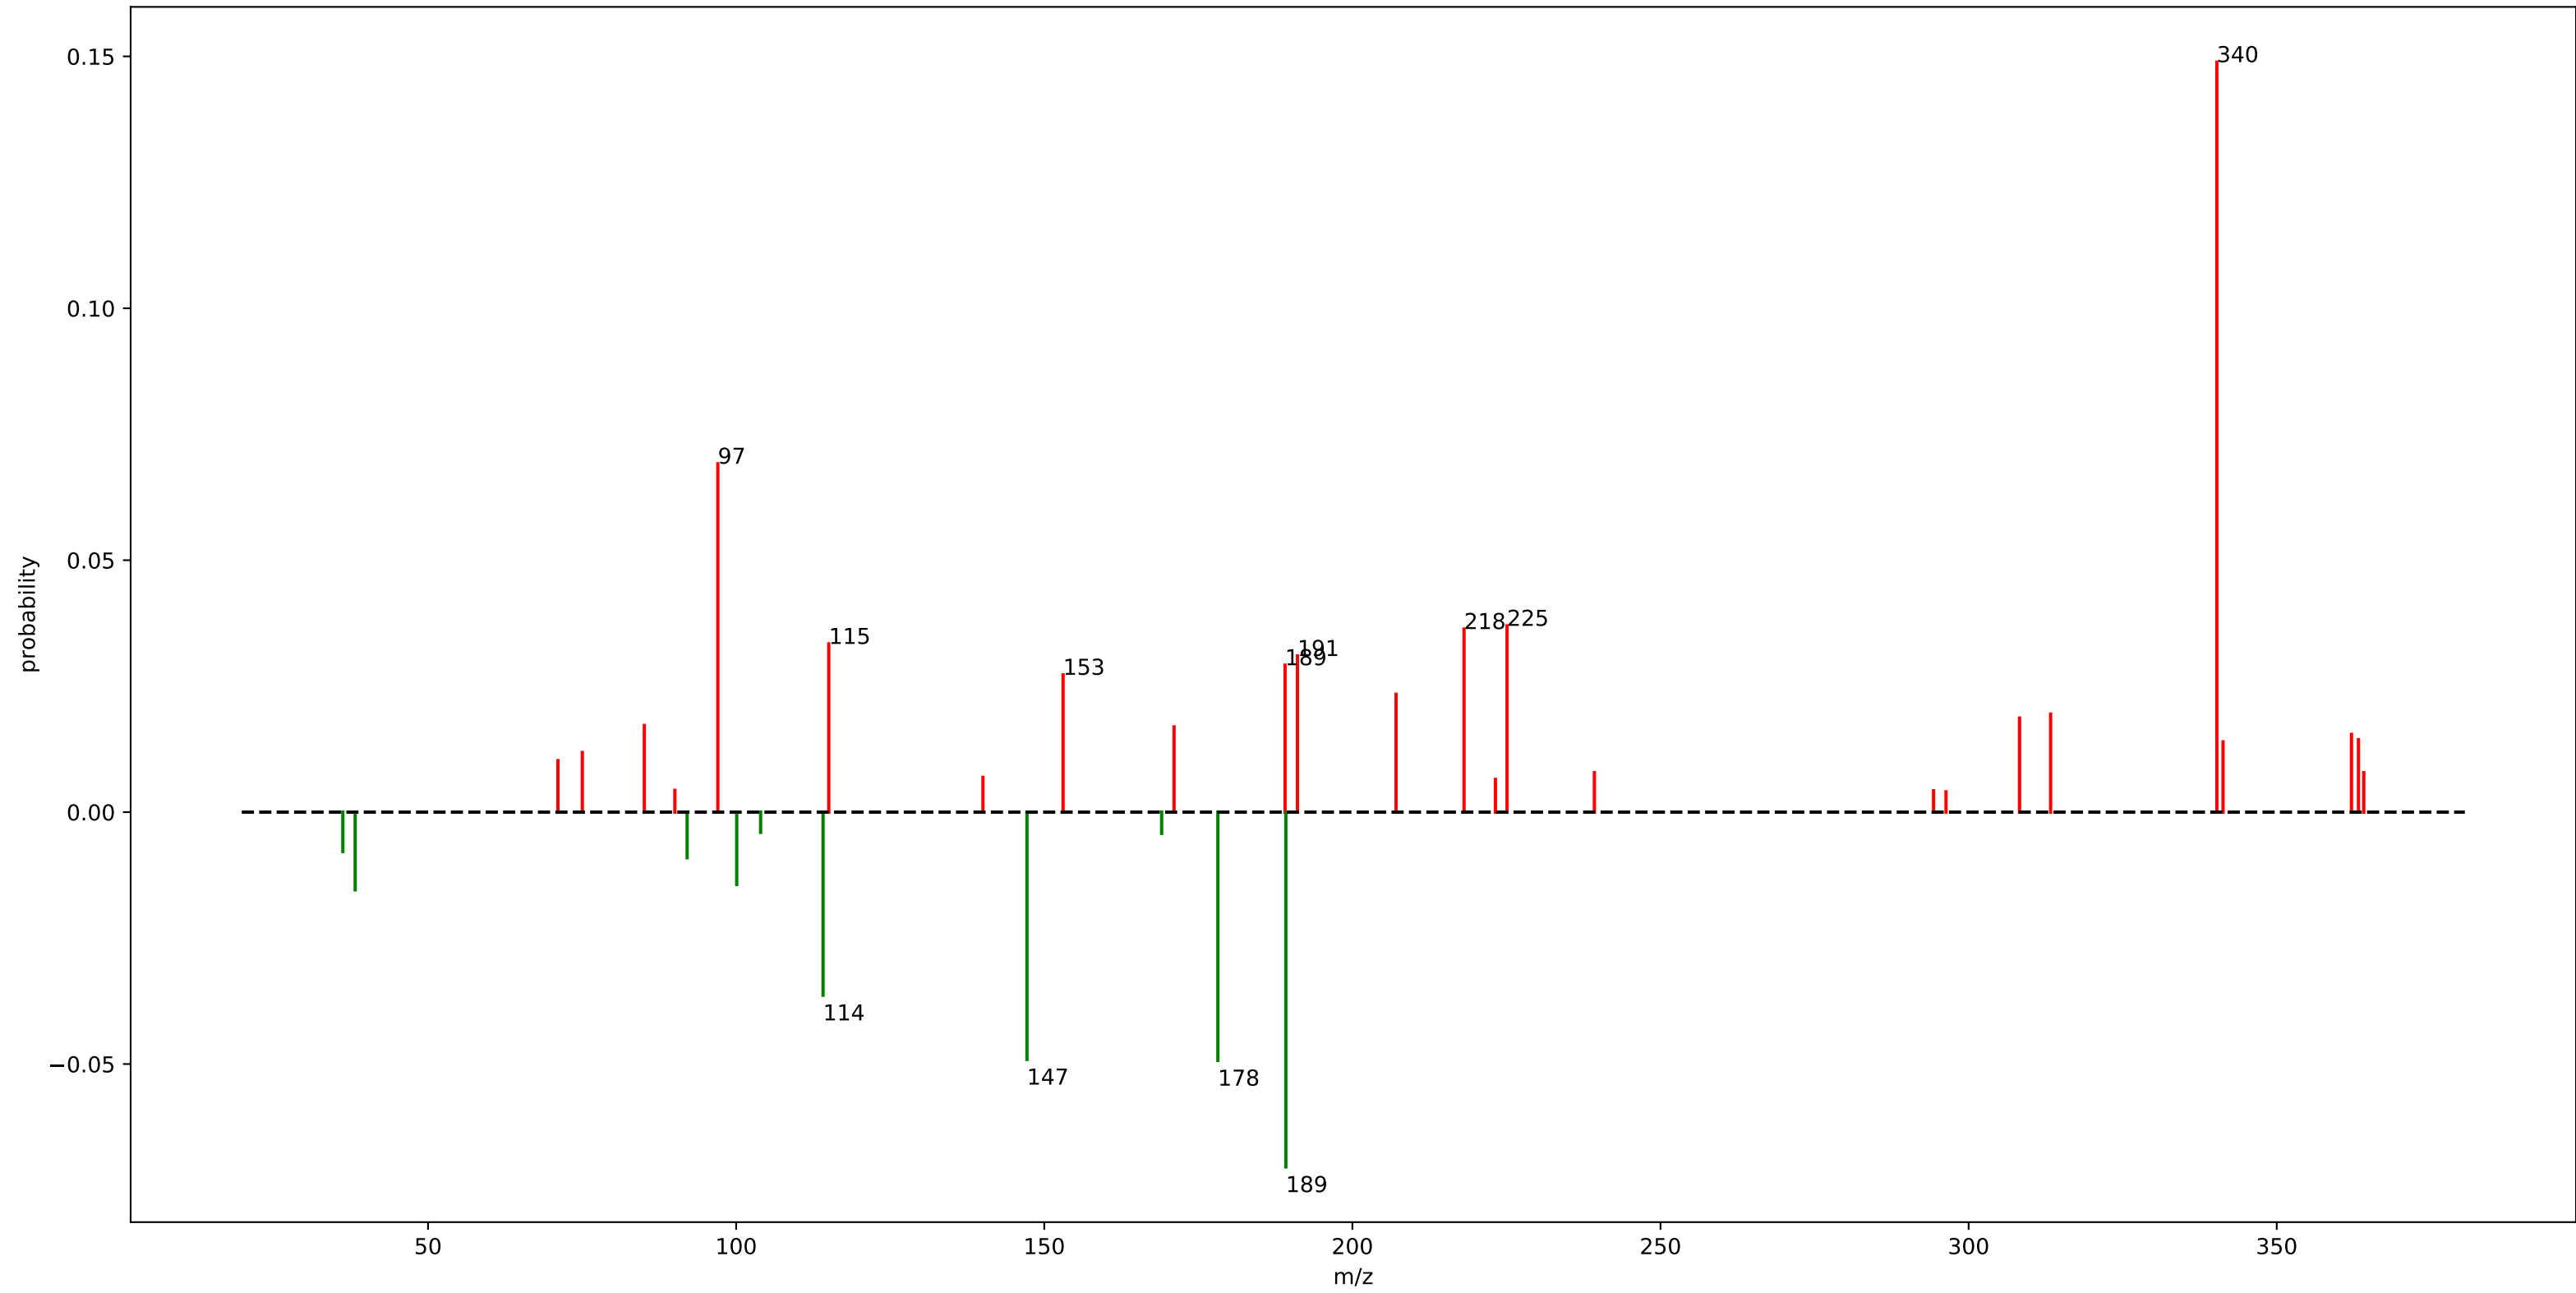

## motif\_522

|                   |        |                   |        |
|-------------------|--------|-------------------|--------|
| fragment_340.2825 | : 0.15 | loss_100.0975     | : 0.01 |
| loss_189.2025     | : 0.07 | fragment_341.2875 | : 0.01 |
| fragment_97.0275  | : 0.07 | fragment_75.0425  | : 0.01 |
| loss_178.1725     | : 0.05 | fragment_71.0825  | : 0.01 |
| loss_147.1925     | : 0.05 | loss_92.0475      | : 0.01 |
| fragment_225.0975 | : 0.04 | fragment_239.2725 | : 0.01 |
| loss_114.1025     | : 0.04 | fragment_364.1275 | : 0.01 |
| fragment_218.1175 | : 0.04 | loss_36.1775      | : 0.01 |
| fragment_115.0375 | : 0.03 | fragment_140.0475 | : 0.01 |
| fragment_191.0875 | : 0.03 | fragment_223.2075 | : 0.01 |
| fragment_189.0725 | : 0.03 |                   |        |
| fragment_153.0525 | : 0.03 |                   |        |
| fragment_207.0875 | : 0.02 |                   |        |
| fragment_313.3075 | : 0.02 |                   |        |
| fragment_308.2575 | : 0.02 |                   |        |
| fragment_85.1025  | : 0.02 |                   |        |
| fragment_171.0625 | : 0.02 |                   |        |
| fragment_362.1275 | : 0.02 |                   |        |
| loss_38.1775      | : 0.02 |                   |        |
| fragment_363.2625 | : 0.01 |                   |        |



motif\_595

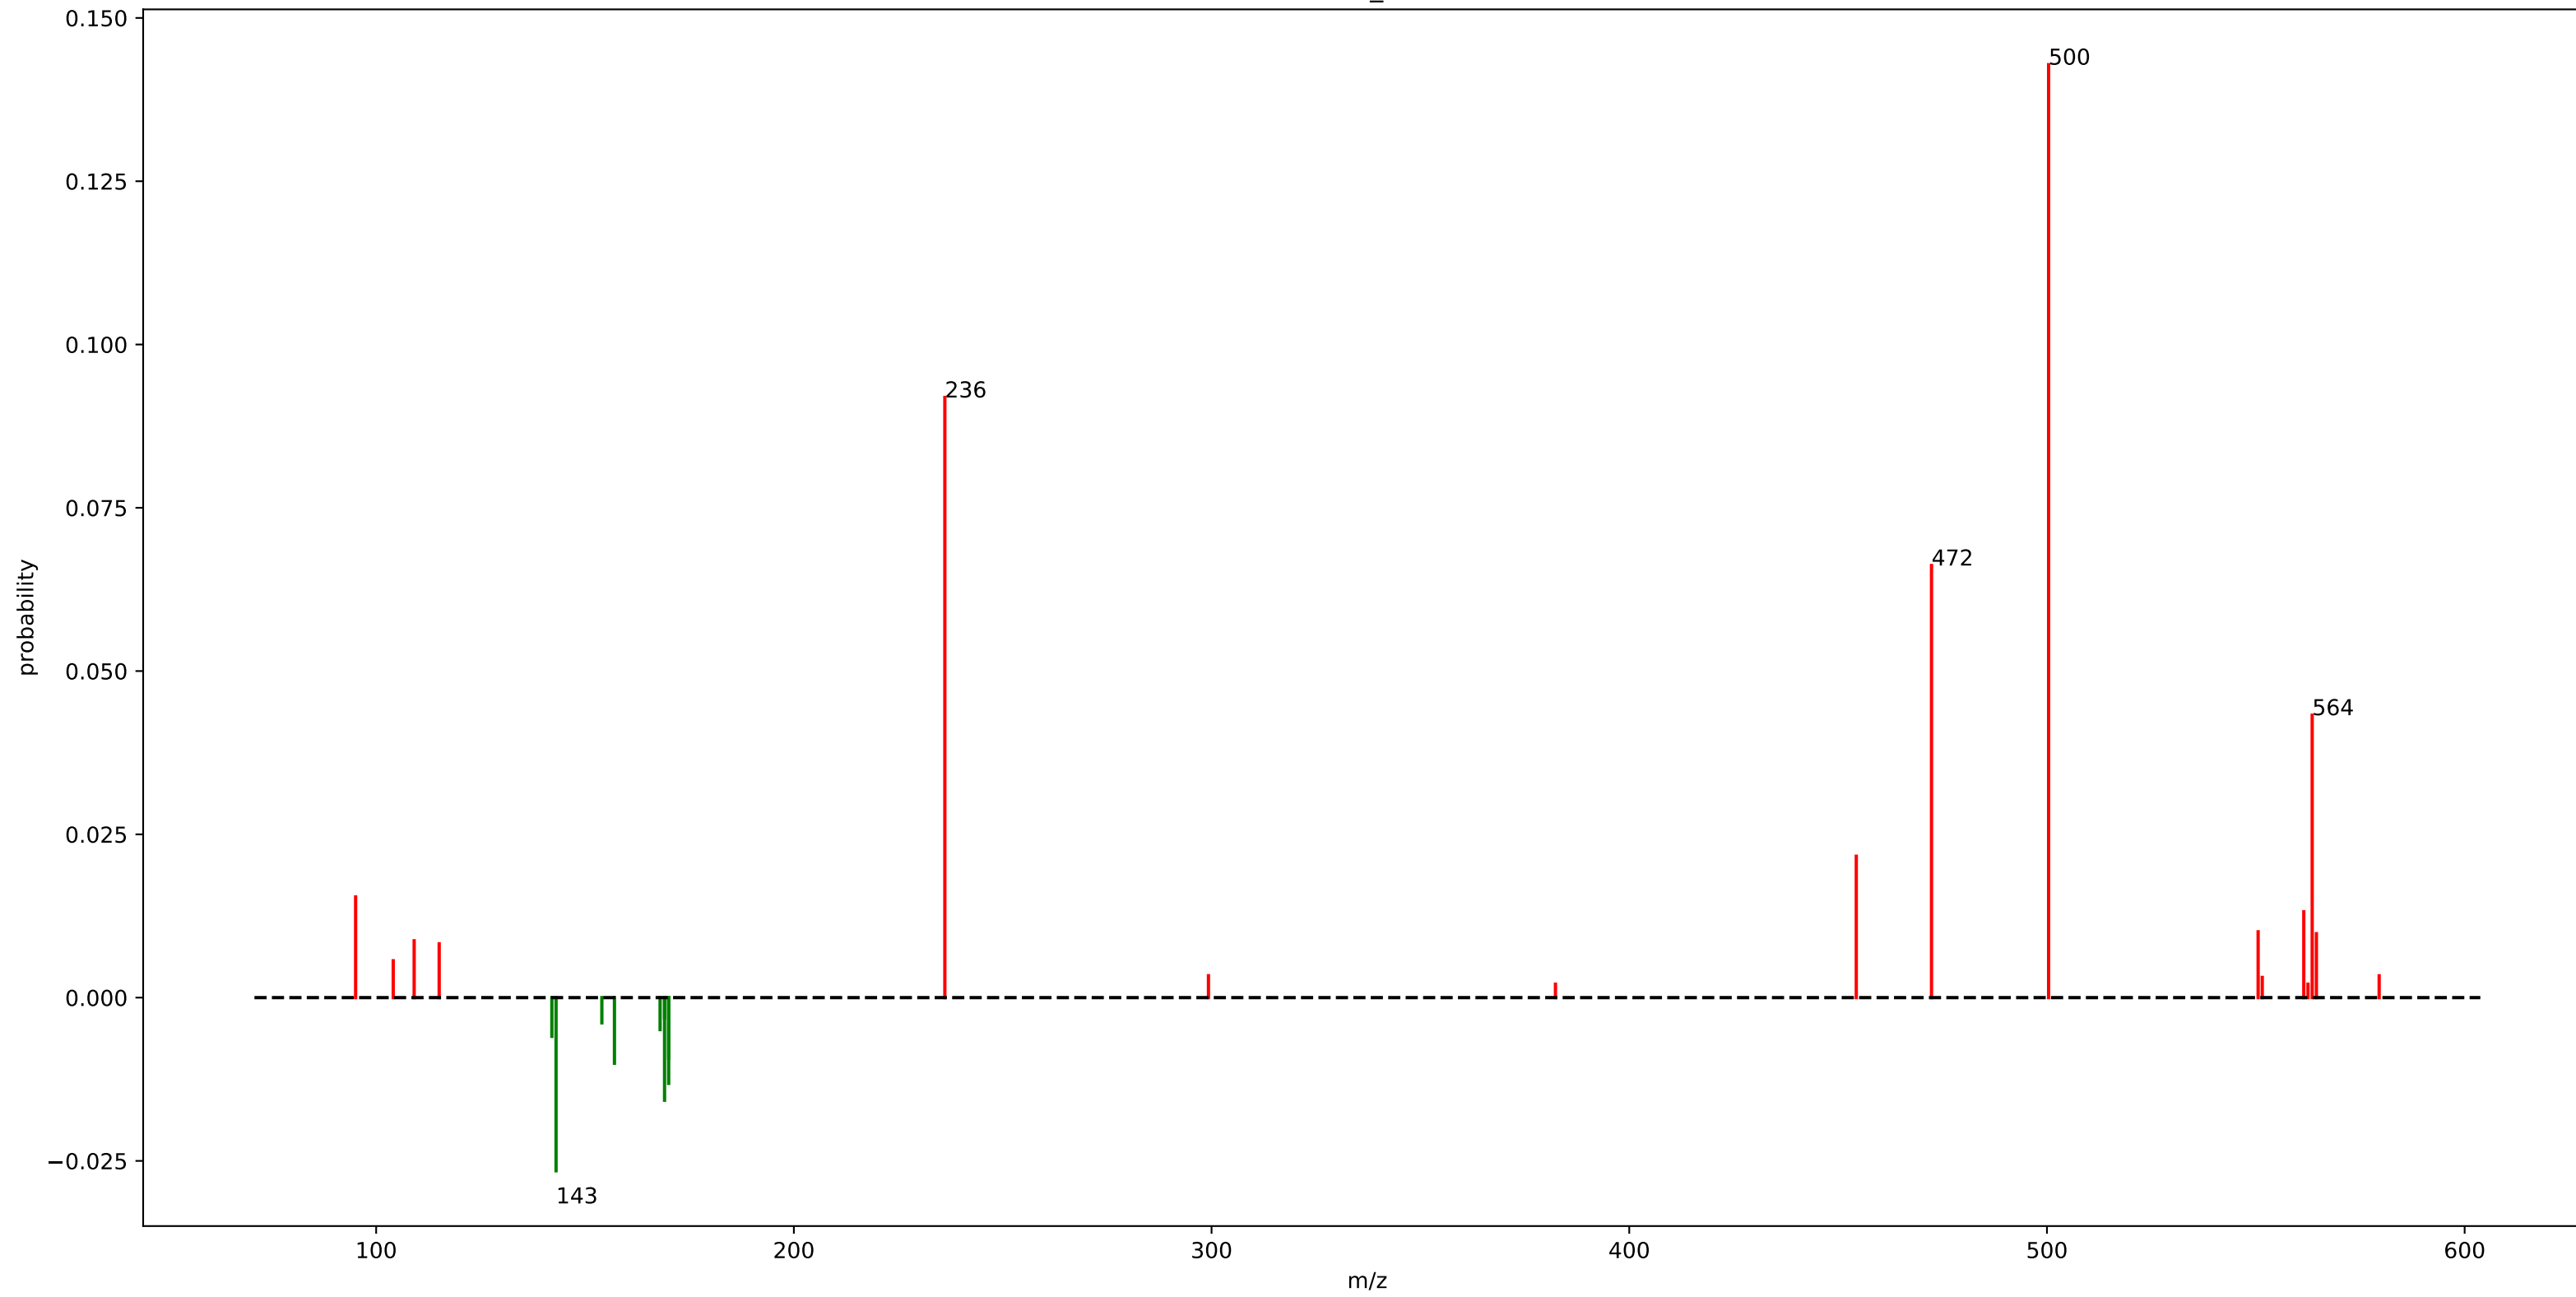

## motif\_595

|                   |        |
|-------------------|--------|
| fragment_500.3975 | : 0.14 |
| fragment_236.1475 | : 0.09 |
| fragment_472.3625 | : 0.07 |
| fragment_563.5025 | : 0.04 |
| loss_143.0675     | : 0.03 |
| fragment_454.3525 | : 0.02 |
| loss_169.0425     | : 0.02 |
| fragment_95.0825  | : 0.02 |
| fragment_561.4875 | : 0.01 |
| loss_170.0325     | : 0.01 |
| fragment_550.5575 | : 0.01 |
| loss_157.0475     | : 0.01 |
| fragment_564.5075 | : 0.01 |
| loss_170.0275     | : 0.01 |
| fragment_109.0975 | : 0.01 |
| fragment_115.0875 | : 0.01 |
| loss_142.0625     | : 0.01 |
| fragment_104.0825 | : 0.01 |

gnps\_motif\_52.m2m

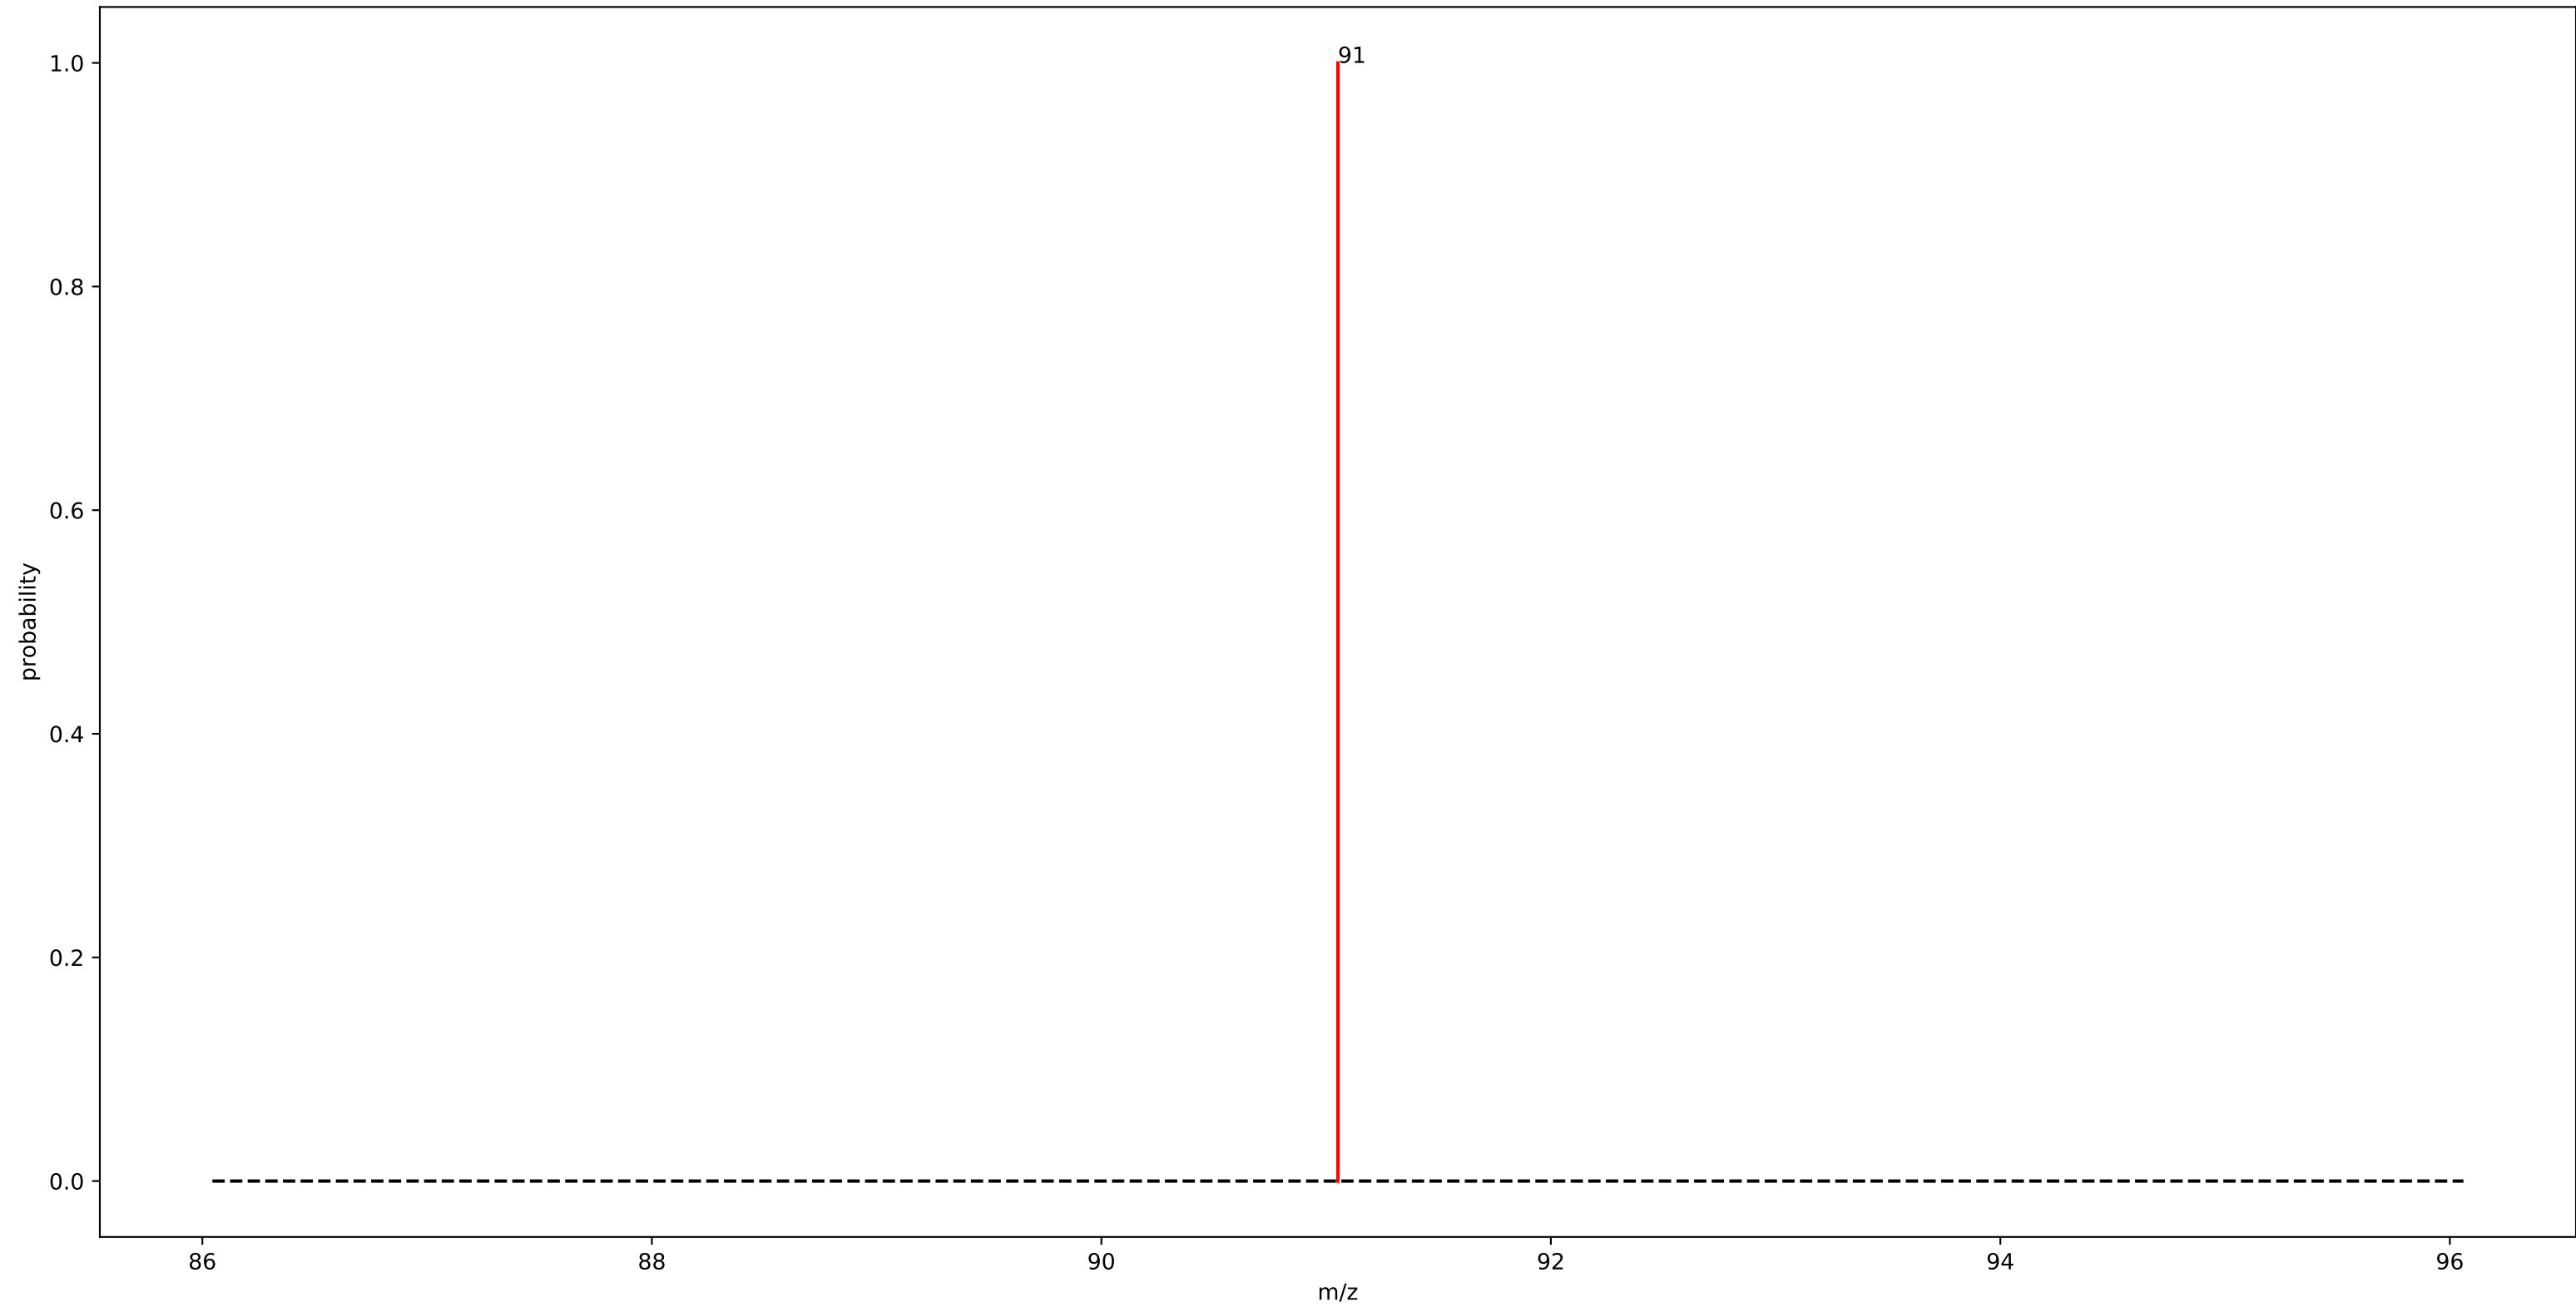

# gnps\_motif\_52.m2m

fragment\_91.0525 : 1.00

motif\_593

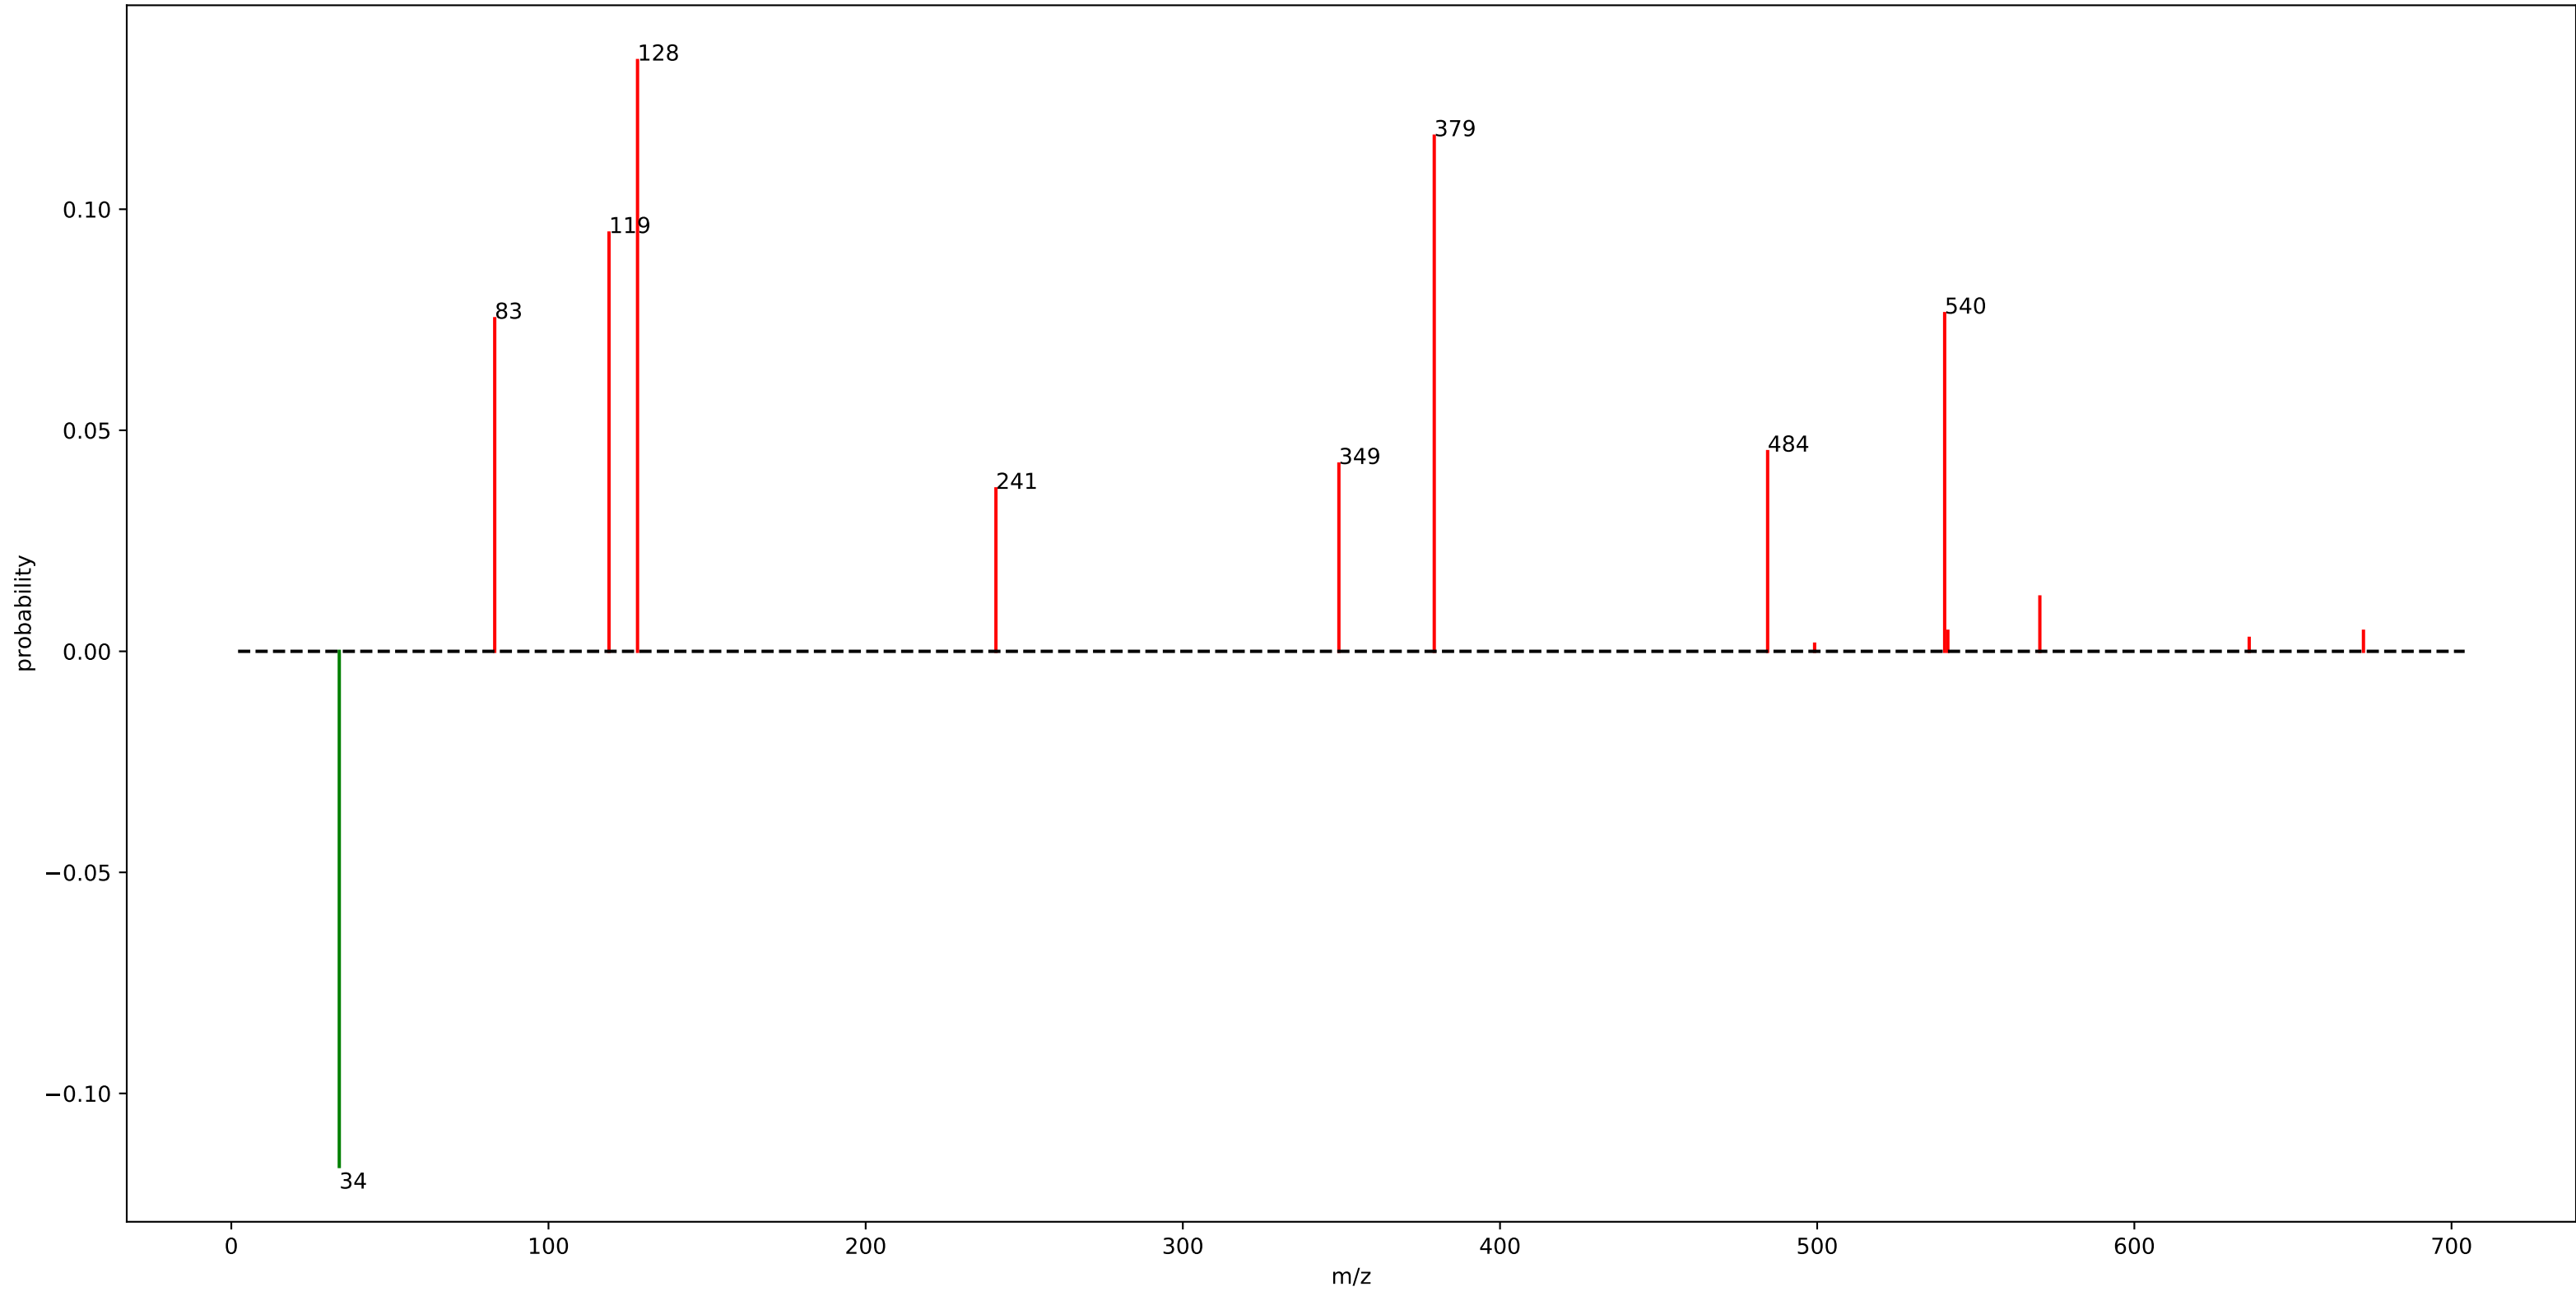

## motif\_593

|                   |        |
|-------------------|--------|
| fragment_128.0725 | : 0.13 |
| loss_34.0375      | : 0.12 |
| fragment_379.2675 | : 0.12 |
| fragment_119.0825 | : 0.09 |
| fragment_540.1925 | : 0.08 |
| fragment_83.0475  | : 0.08 |
| fragment_484.3775 | : 0.05 |
| fragment_349.2025 | : 0.04 |
| fragment_241.0725 | : 0.04 |
| fragment_570.2025 | : 0.01 |

rhamn\_motif\_64.m2m

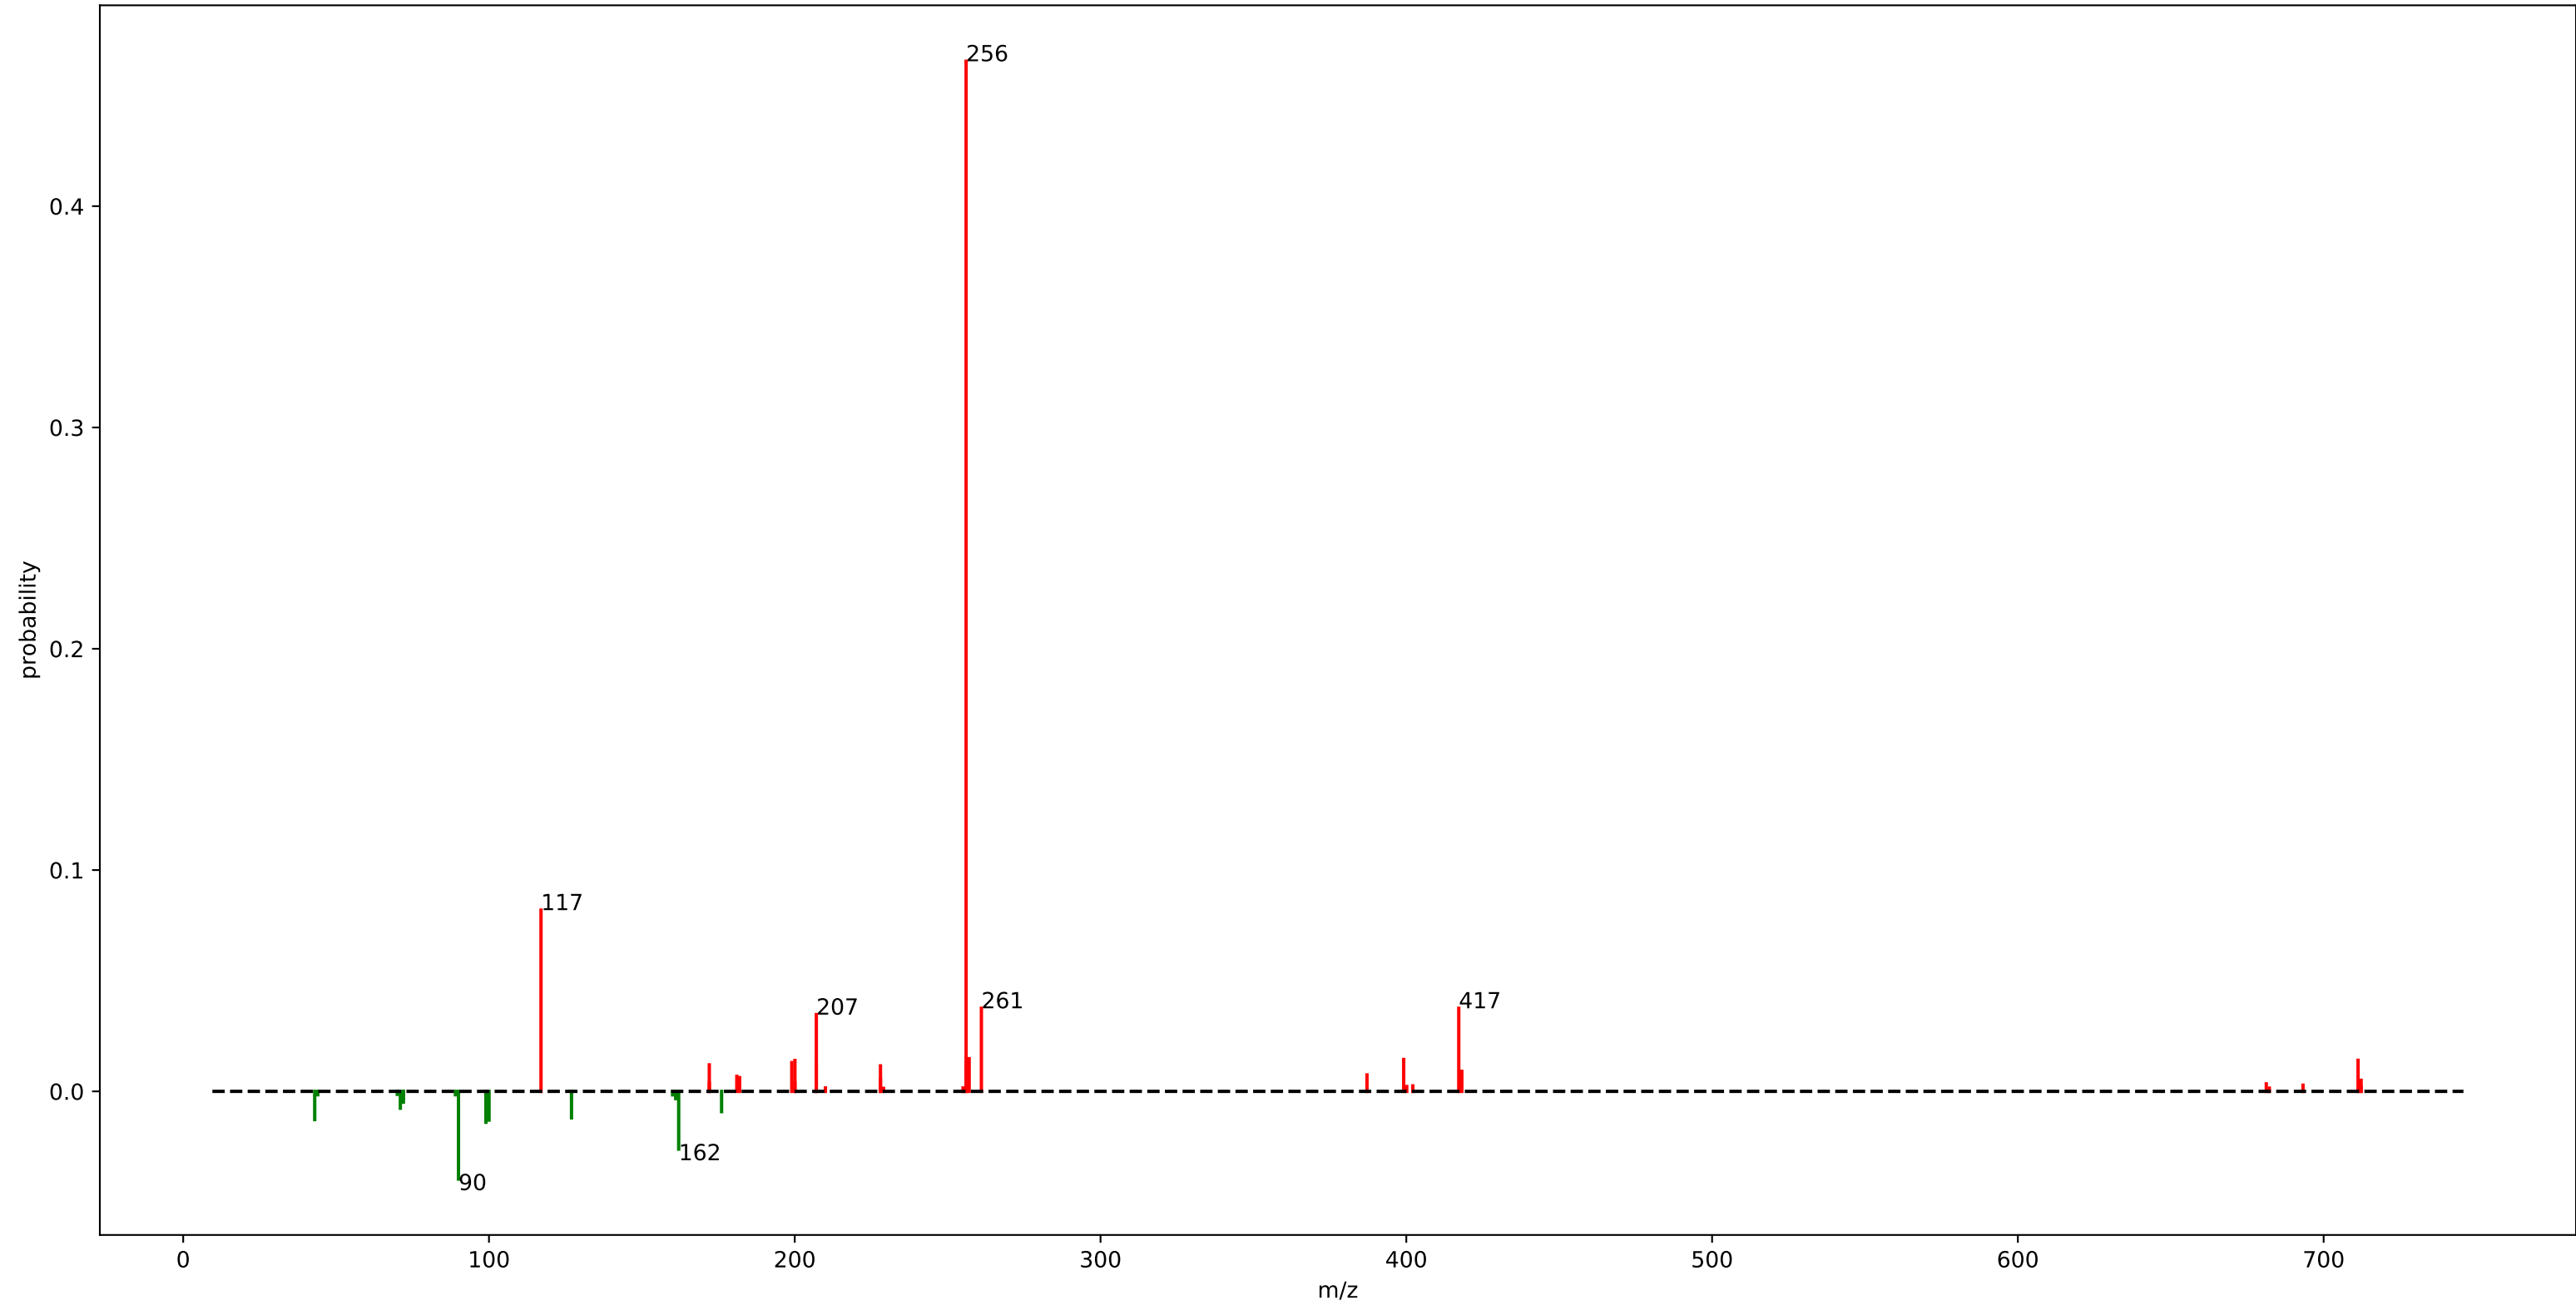

# rhamn\_motif\_64.m2m

|                   |        |                   |        |
|-------------------|--------|-------------------|--------|
| fragment_256.0375 | : 0.47 | loss_176.0725     | : 0.01 |
| fragment_117.0175 | : 0.08 | fragment_418.1625 | : 0.01 |
| loss_90.0325      | : 0.04 | loss_71.0175      | : 0.01 |
| fragment_261.0375 | : 0.04 | fragment_387.1425 | : 0.01 |
| fragment_417.1575 | : 0.04 | fragment_181.0525 | : 0.01 |
| fragment_207.0525 | : 0.03 | fragment_181.9675 | : 0.01 |
| loss_162.0475     | : 0.03 | fragment_228.0425 | : 0.01 |
| fragment_257.0375 | : 0.01 |                   |        |
| fragment_399.1475 | : 0.01 |                   |        |
| fragment_711.2525 | : 0.01 |                   |        |
| loss_98.9975      | : 0.01 |                   |        |
| fragment_200.0575 | : 0.01 |                   |        |
| fragment_199.0325 | : 0.01 |                   |        |
| loss_100.0225     | : 0.01 |                   |        |
| loss_43.0125      | : 0.01 |                   |        |
| fragment_256.0425 | : 0.01 |                   |        |
| fragment_207.0425 | : 0.01 |                   |        |
| loss_126.9975     | : 0.01 |                   |        |
| fragment_172.0575 | : 0.01 |                   |        |
| fragment_228.0375 | : 0.01 |                   |        |



motif\_591

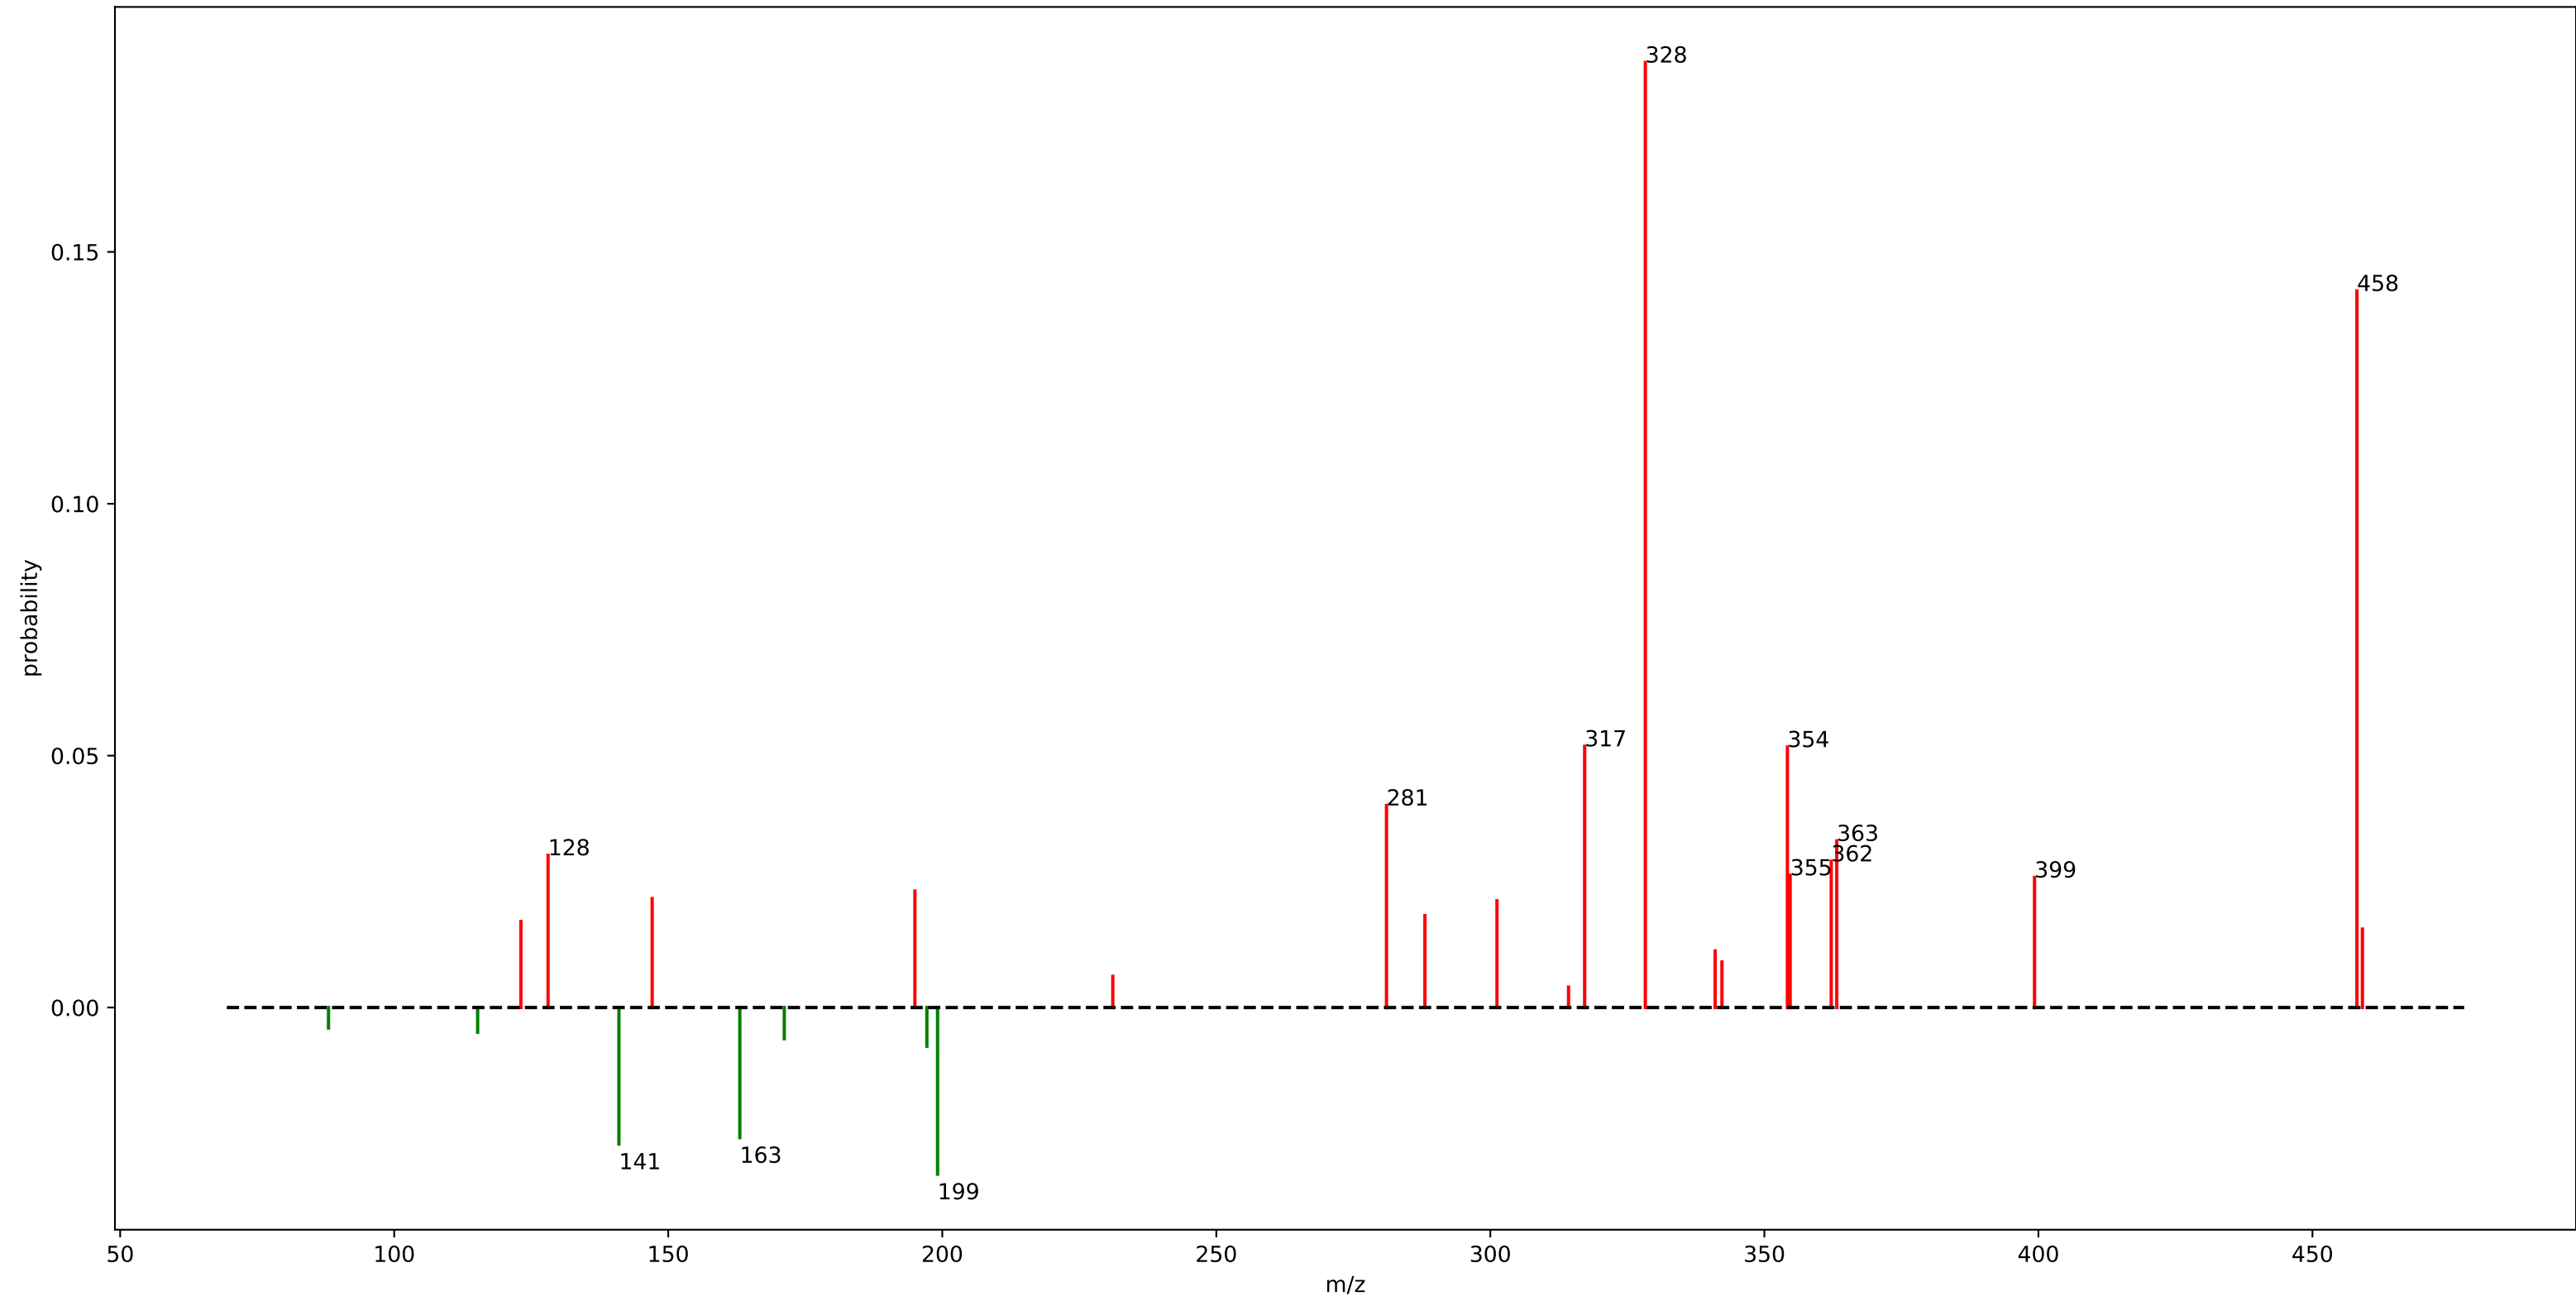

## motif\_591

|                   |        |                   |        |
|-------------------|--------|-------------------|--------|
| fragment_328.2825 | : 0.19 | fragment_342.2625 | : 0.01 |
| fragment_458.1175 | : 0.14 | loss_197.1875     | : 0.01 |
| fragment_317.2075 | : 0.05 | loss_171.1725     | : 0.01 |
| fragment_354.2025 | : 0.05 | fragment_231.1125 | : 0.01 |
| fragment_281.0525 | : 0.04 |                   |        |
| loss_199.1425     | : 0.03 |                   |        |
| fragment_363.2075 | : 0.03 |                   |        |
| fragment_128.0725 | : 0.03 |                   |        |
| fragment_362.2025 | : 0.03 |                   |        |
| loss_141.0025     | : 0.03 |                   |        |
| fragment_354.7025 | : 0.03 |                   |        |
| fragment_399.2925 | : 0.03 |                   |        |
| loss_163.0575     | : 0.03 |                   |        |
| fragment_195.0025 | : 0.02 |                   |        |
| fragment_147.0675 | : 0.02 |                   |        |
| fragment_301.2125 | : 0.02 |                   |        |
| fragment_288.0625 | : 0.02 |                   |        |
| fragment_123.1175 | : 0.02 |                   |        |
| fragment_459.1225 | : 0.02 |                   |        |
| fragment_341.0175 | : 0.01 |                   |        |

motif\_590

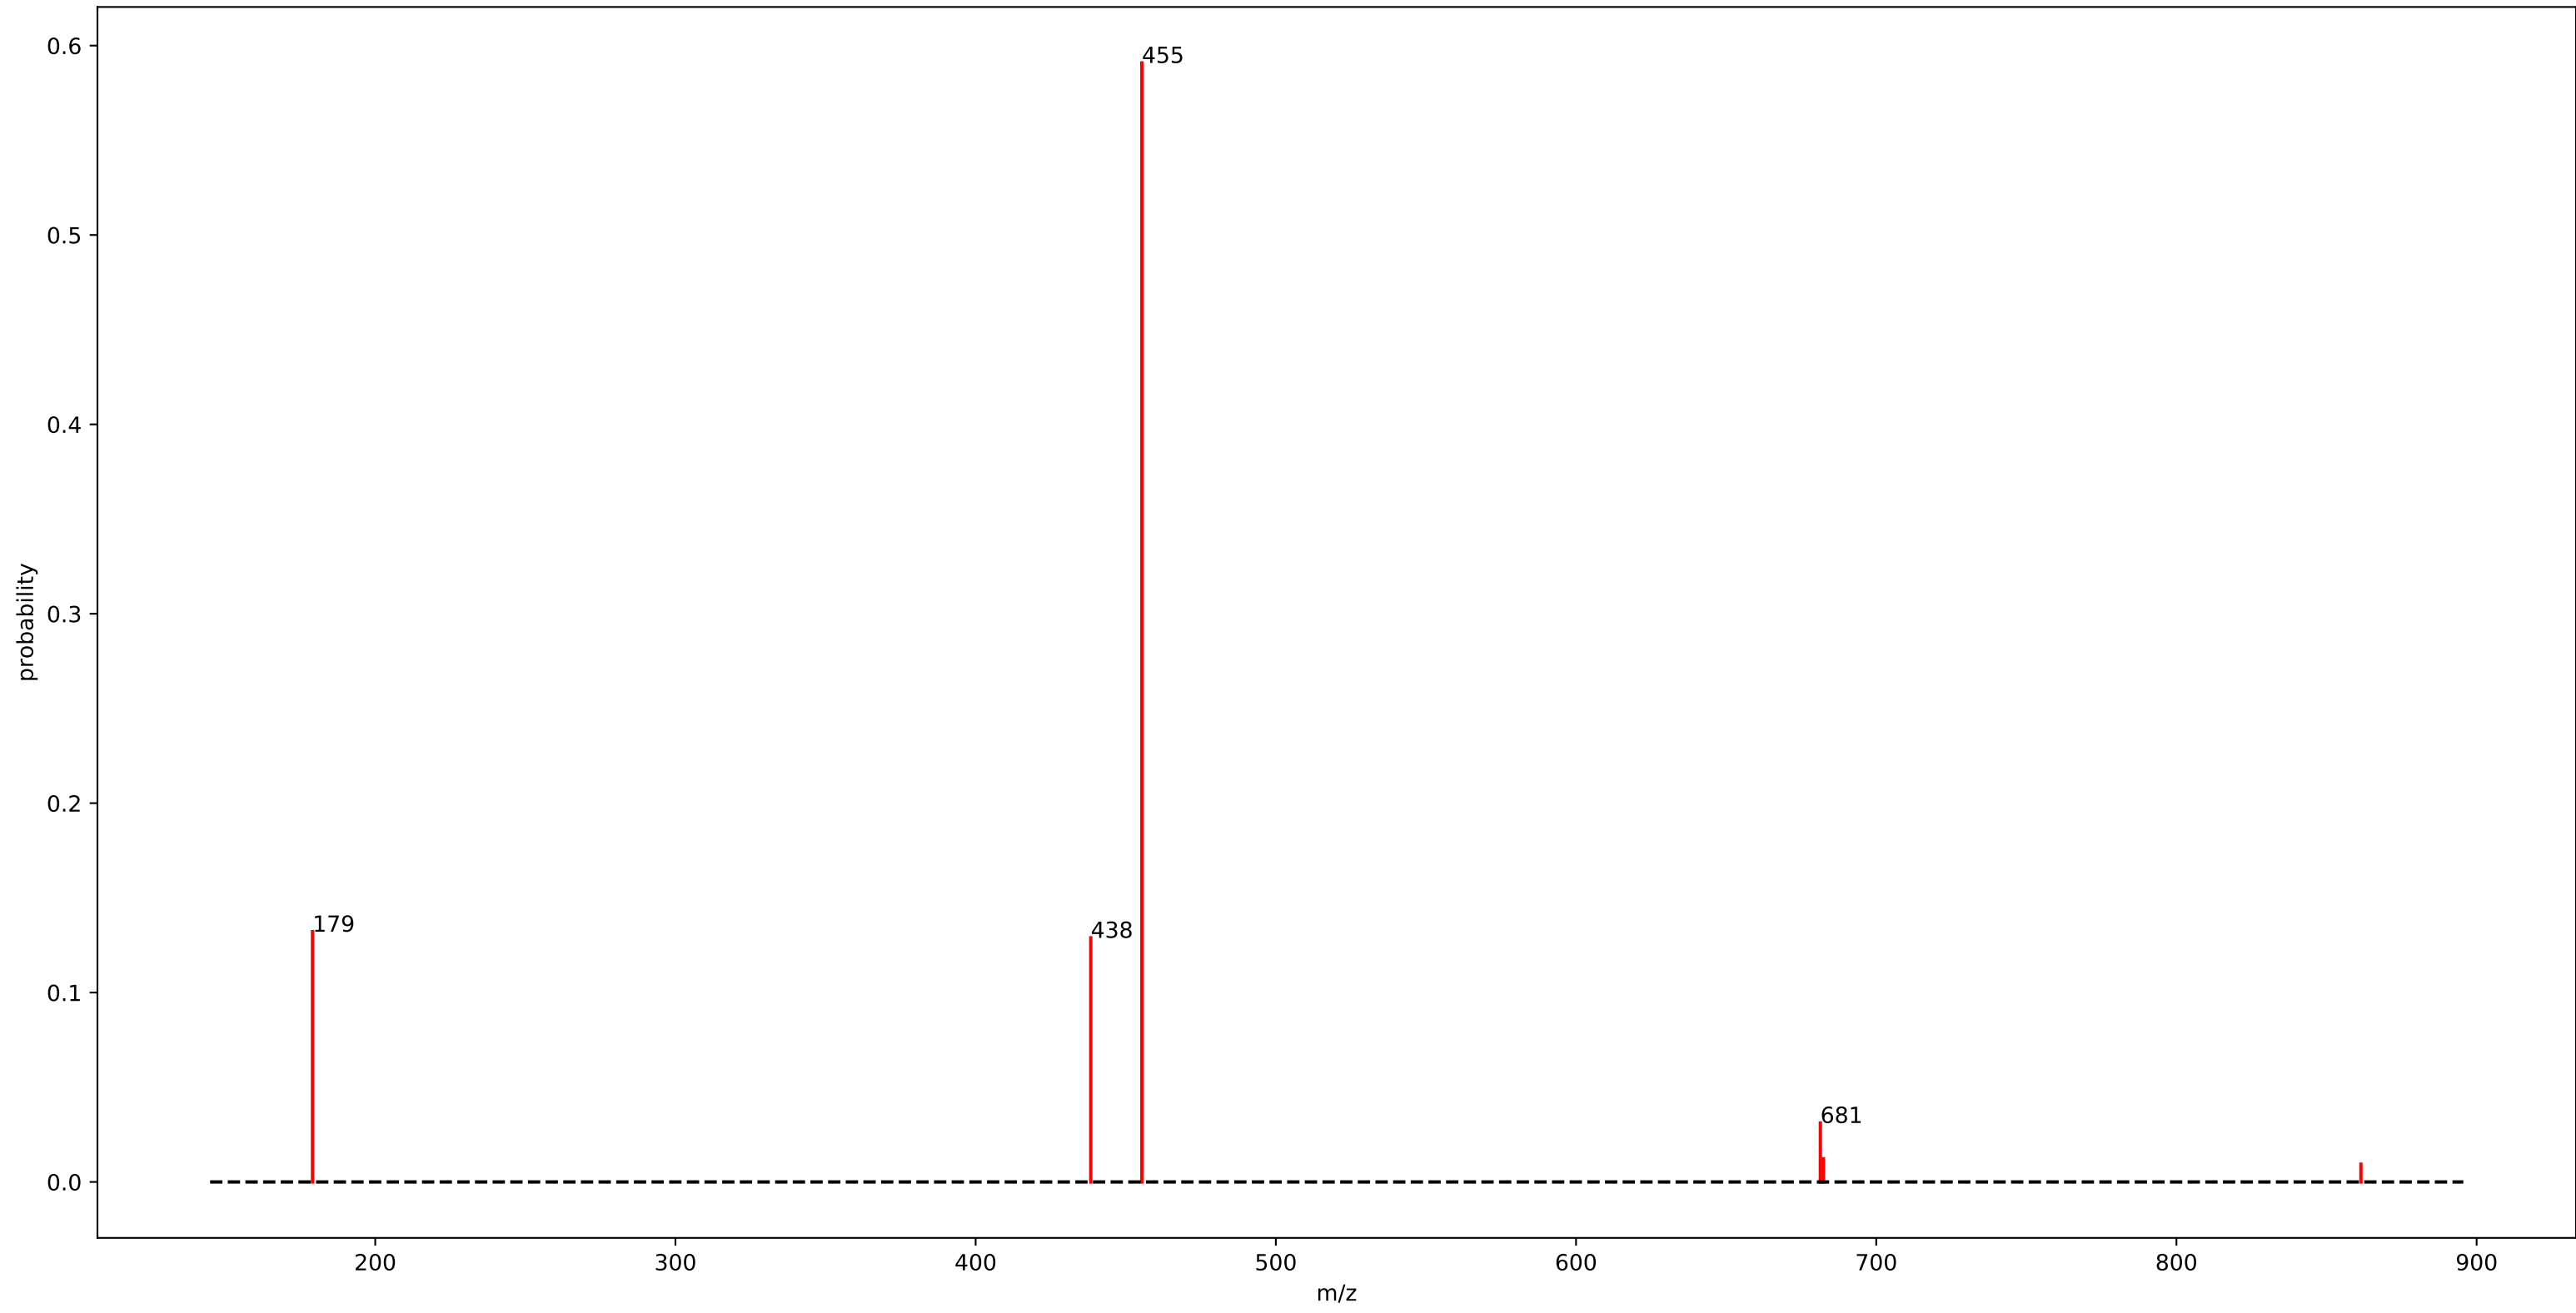

## motif\_590

|                   |        |
|-------------------|--------|
| fragment_455.3525 | : 0.59 |
| fragment_179.1075 | : 0.13 |
| fragment_438.3475 | : 0.13 |
| fragment_681.3875 | : 0.03 |
| fragment_682.3875 | : 0.01 |
| fragment_861.4525 | : 0.01 |

urine\_mass2motif\_213.m2m

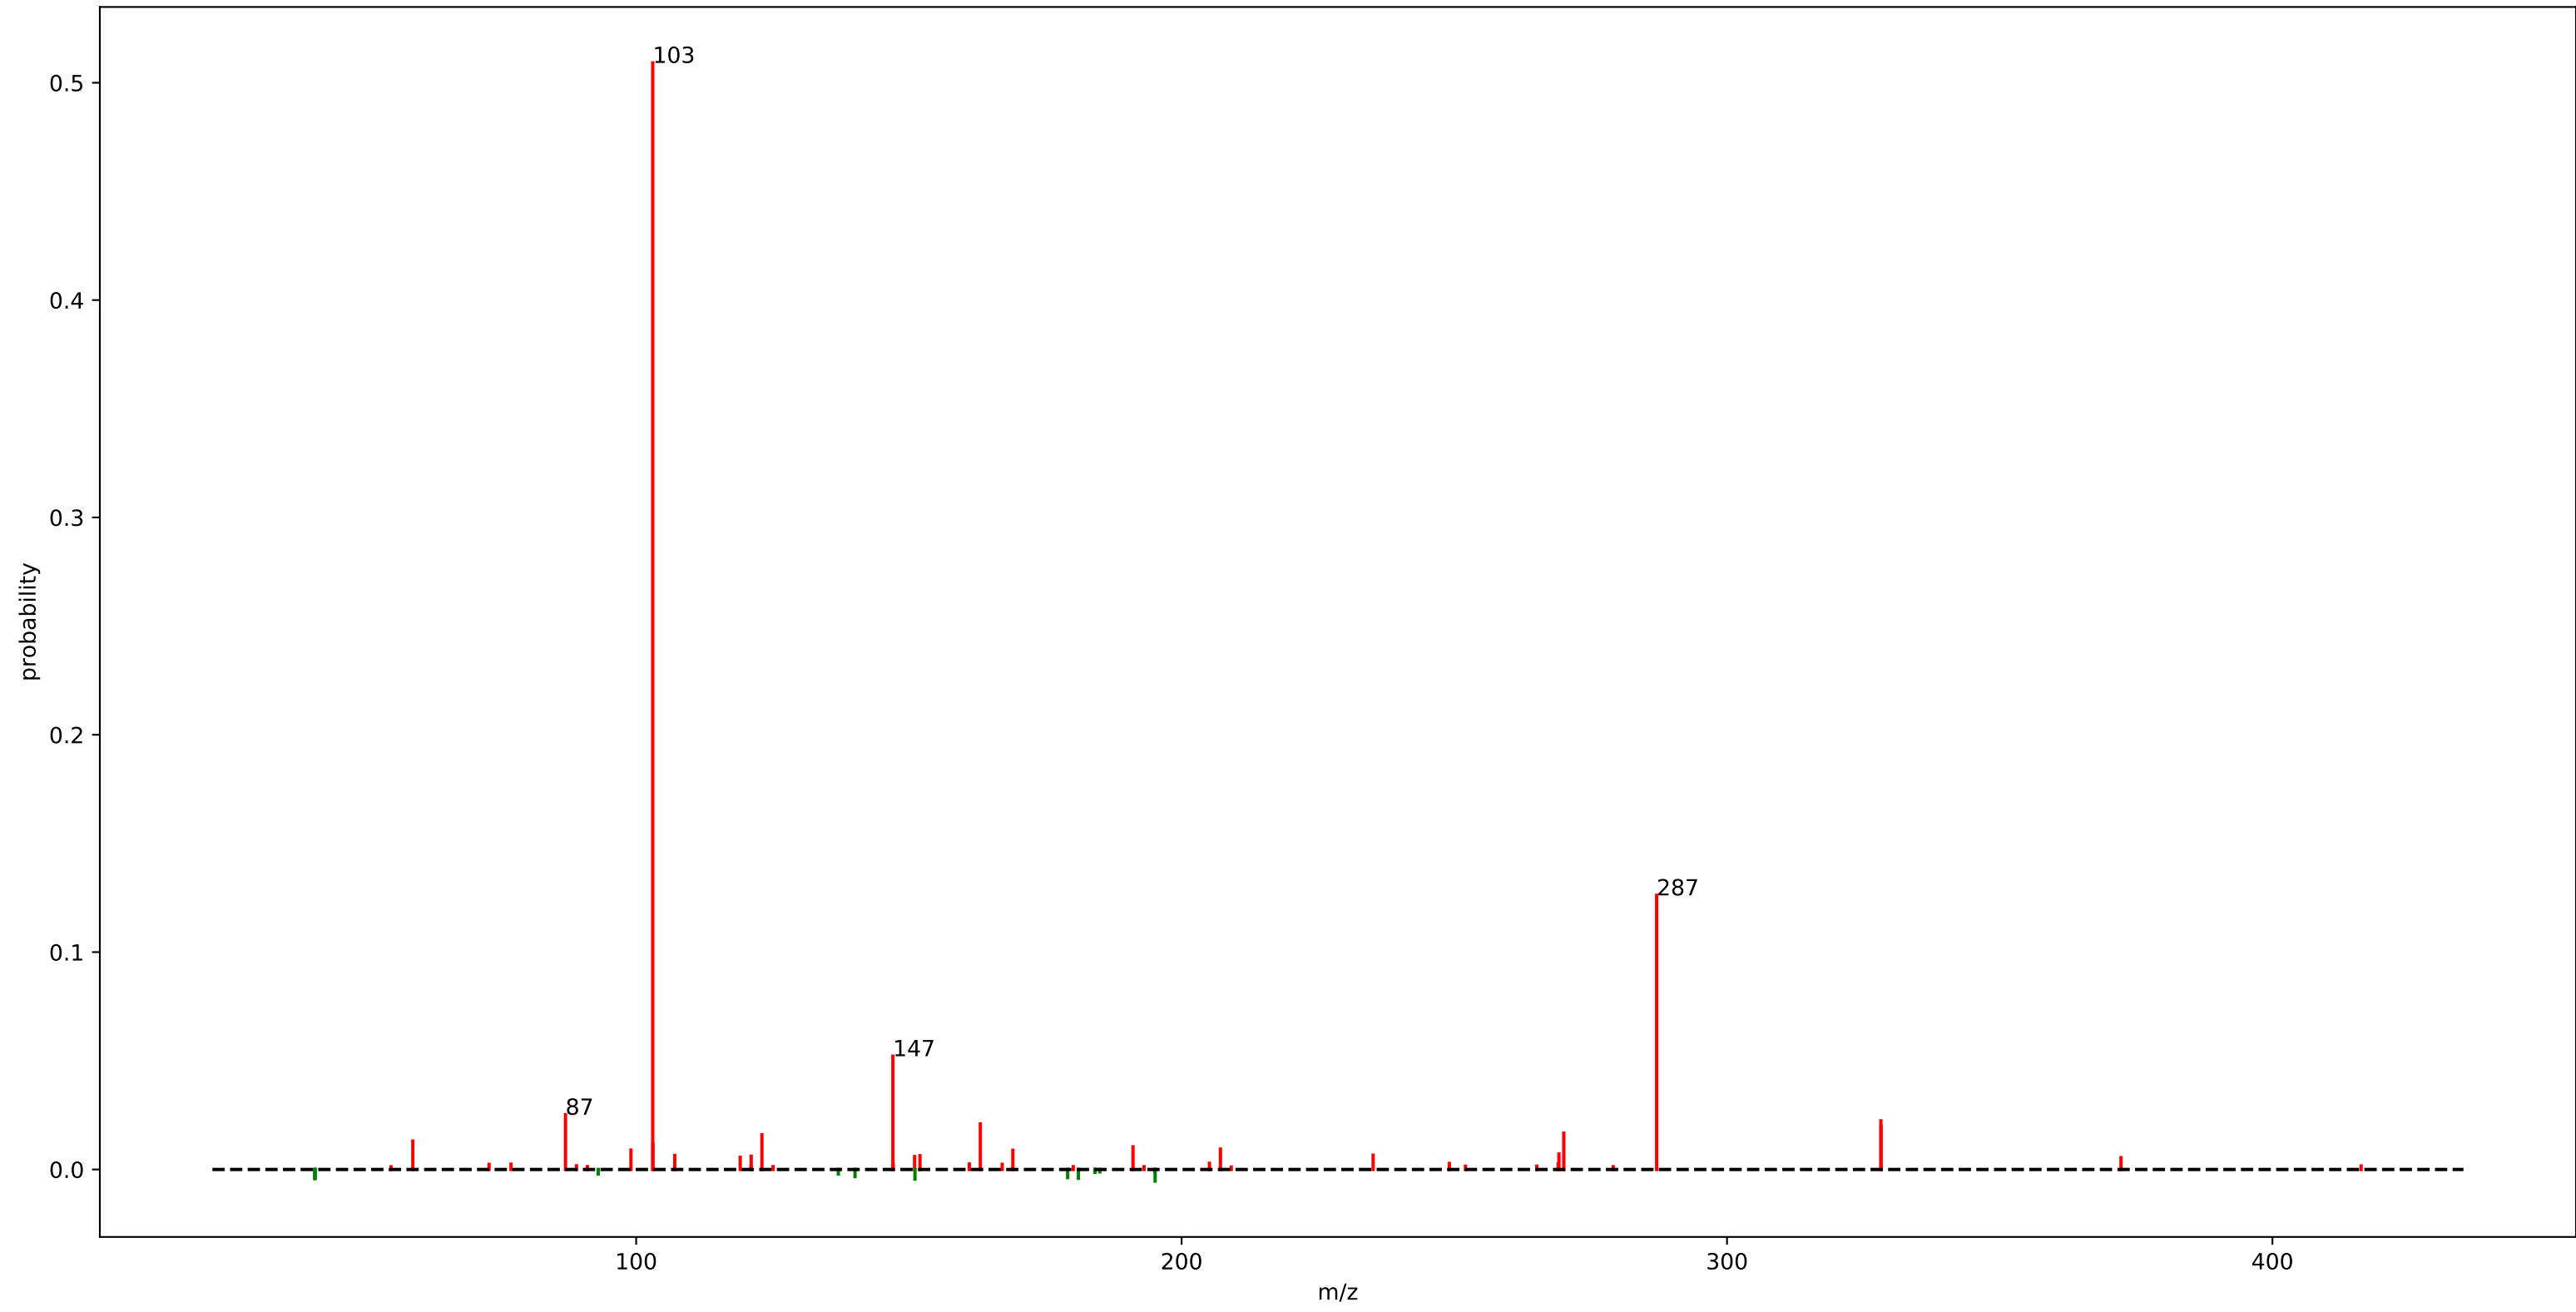

# urine\_mass2motif\_213.m2m

|                   |        |                   |        |
|-------------------|--------|-------------------|--------|
| fragment_103.0375 | : 0.51 | fragment_151.0475 | : 0.01 |
| fragment_287.1025 | : 0.13 | fragment_119.0725 | : 0.01 |
| fragment_147.0675 | : 0.05 | fragment_372.2375 | : 0.01 |
| fragment_87.0425  | : 0.03 | loss_195.1475     | : 0.01 |
| fragment_328.2125 | : 0.02 |                   |        |
| fragment_163.0975 | : 0.02 |                   |        |
| fragment_328.2475 | : 0.02 |                   |        |
| fragment_270.0725 | : 0.02 |                   |        |
| fragment_123.0525 | : 0.02 |                   |        |
| fragment_59.0475  | : 0.01 |                   |        |
| fragment_103.0775 | : 0.01 |                   |        |
| fragment_191.0925 | : 0.01 |                   |        |
| fragment_207.1225 | : 0.01 |                   |        |
| fragment_99.0425  | : 0.01 |                   |        |
| fragment_169.0625 | : 0.01 |                   |        |
| fragment_269.1775 | : 0.01 |                   |        |
| fragment_235.1175 | : 0.01 |                   |        |
| fragment_107.0725 | : 0.01 |                   |        |
| fragment_152.0325 | : 0.01 |                   |        |
| fragment_121.0875 | : 0.01 |                   |        |

rhamn\_motif\_60.m2m

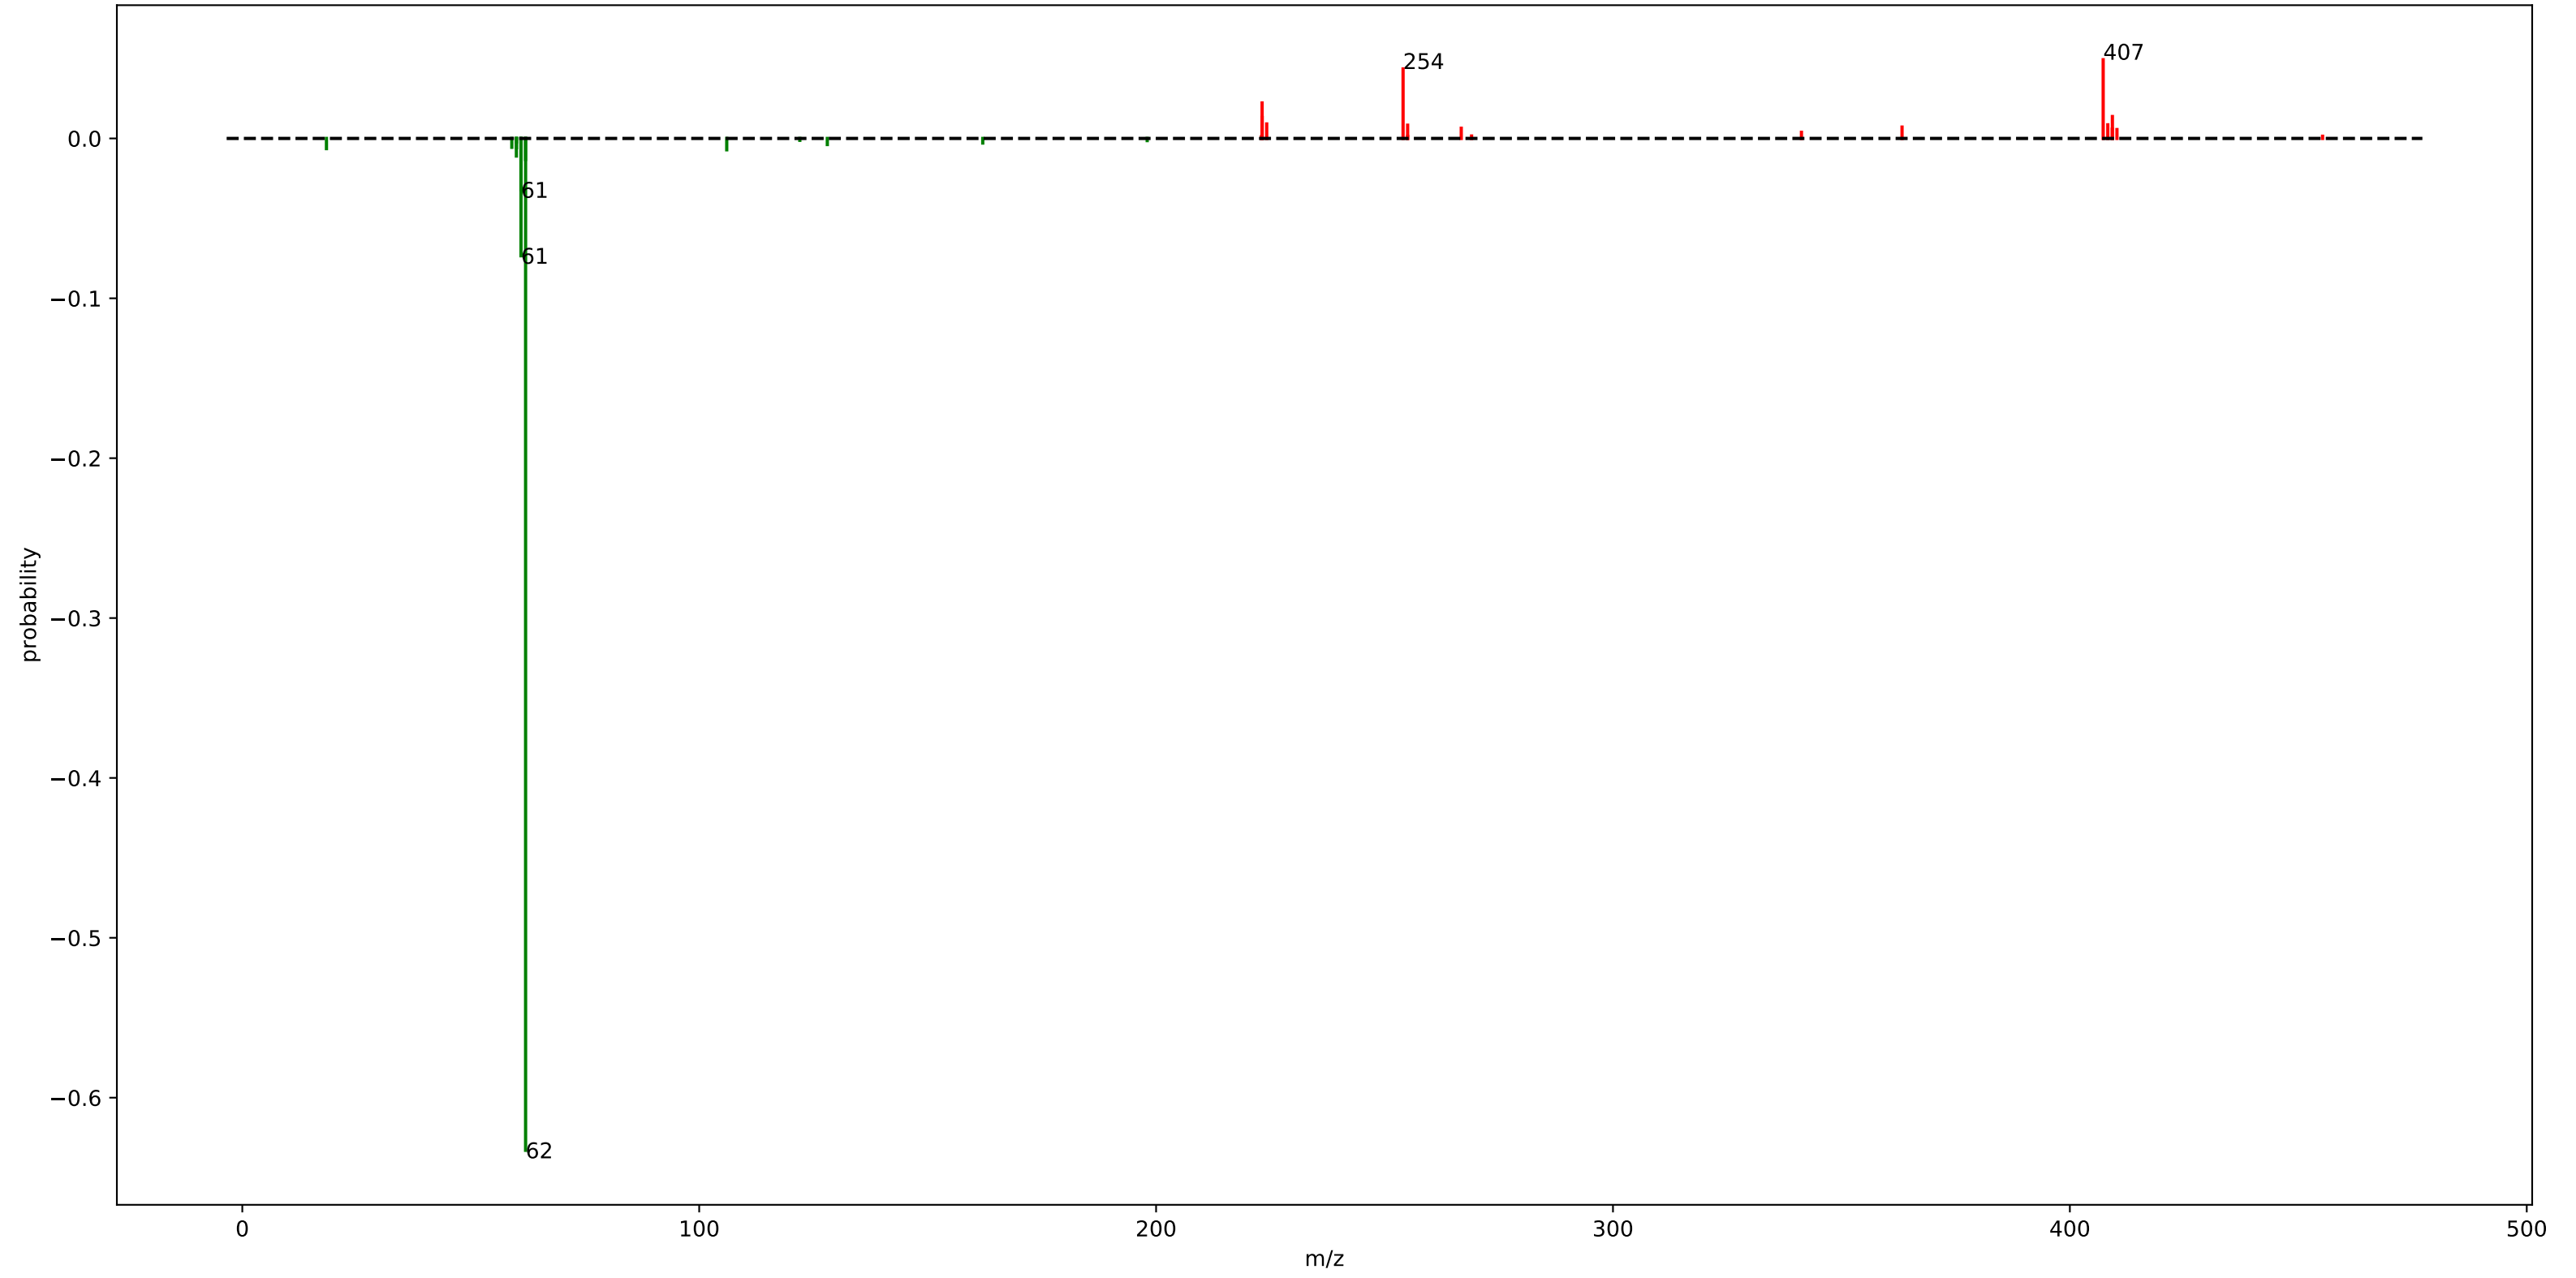

## rhamn\_motif\_60.m2m

|                   |        |                   |        |
|-------------------|--------|-------------------|--------|
| loss_62.0025      | : 0.63 | fragment_410.3075 | : 0.01 |
| loss_60.9975      | : 0.07 |                   |        |
| fragment_407.2925 | : 0.05 |                   |        |
| fragment_254.0575 | : 0.04 |                   |        |
| loss_60.9925      | : 0.03 |                   |        |
| fragment_223.2025 | : 0.02 |                   |        |
| fragment_409.3075 | : 0.01 |                   |        |
| loss_61.9925      | : 0.01 |                   |        |
| fragment_223.2175 | : 0.01 |                   |        |
| loss_59.9875      | : 0.01 |                   |        |
| fragment_224.2125 | : 0.01 |                   |        |
| fragment_408.3025 | : 0.01 |                   |        |
| fragment_255.0575 | : 0.01 |                   |        |
| loss_106.0275     | : 0.01 |                   |        |
| fragment_363.2675 | : 0.01 |                   |        |
| loss_18.4175      | : 0.01 |                   |        |
| fragment_266.7925 | : 0.01 |                   |        |
| fragment_409.2825 | : 0.01 |                   |        |
| loss_60.0125      | : 0.01 |                   |        |
| loss_58.9875      | : 0.01 |                   |        |



motif\_616

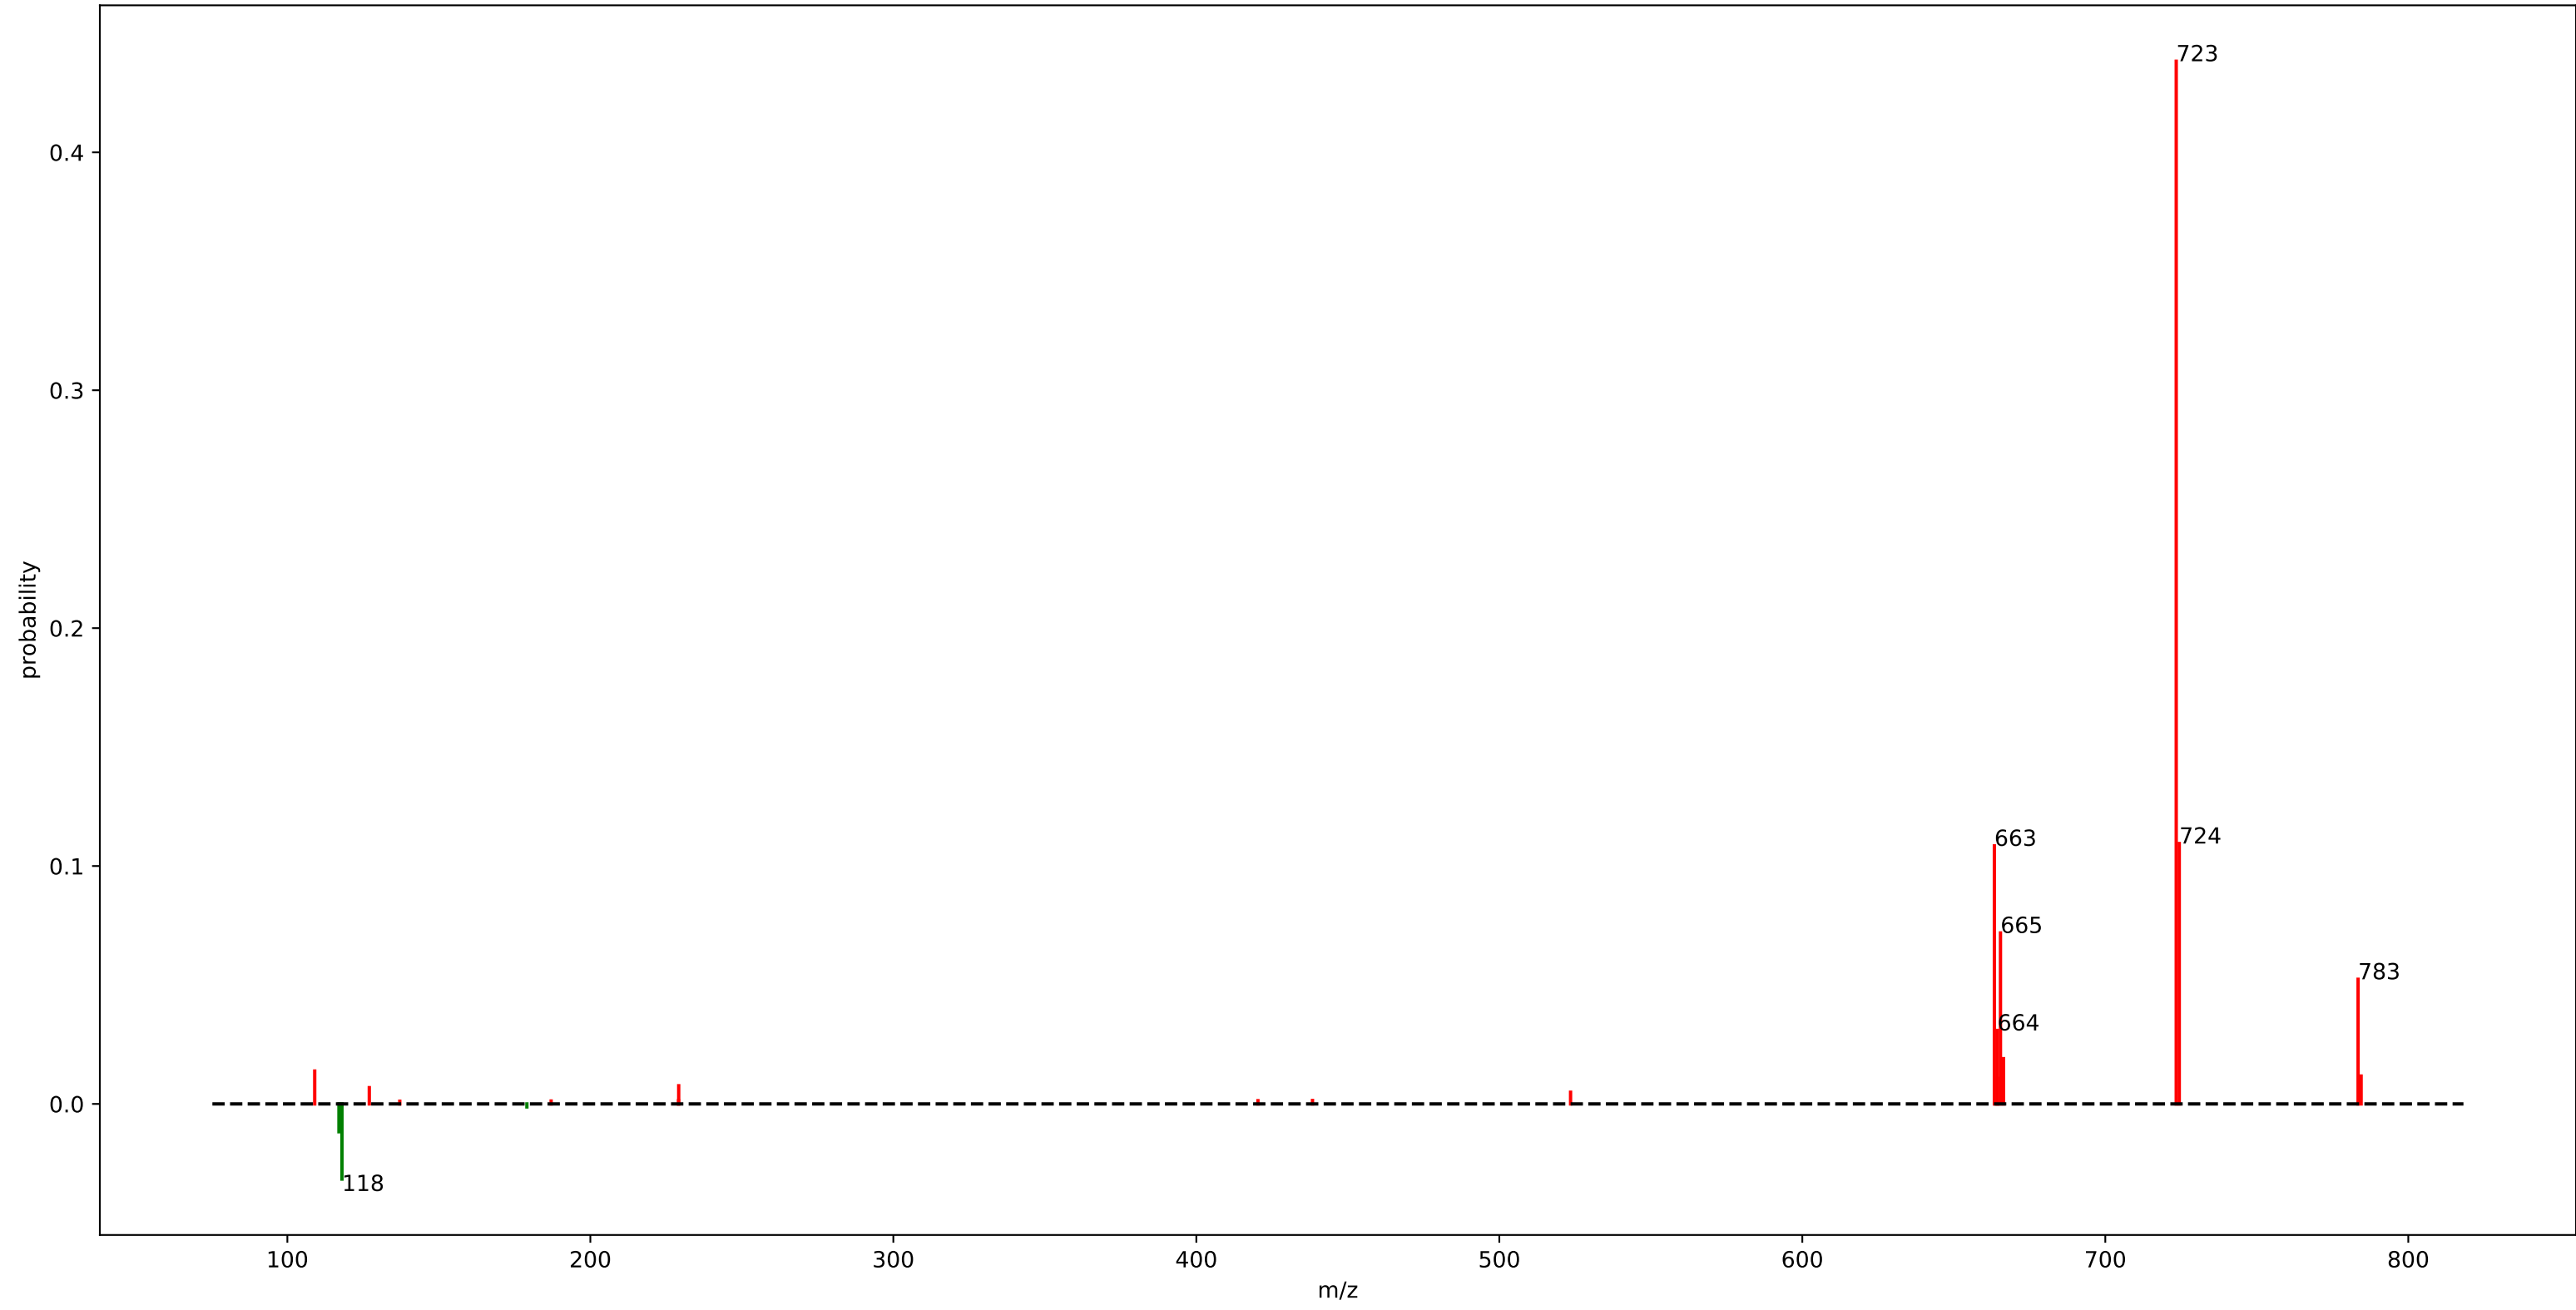

## motif\_616

|                   |        |
|-------------------|--------|
| fragment_723.4075 | : 0.44 |
| fragment_724.4125 | : 0.11 |
| fragment_663.3875 | : 0.11 |
| fragment_665.4025 | : 0.07 |
| fragment_783.4275 | : 0.05 |
| loss_118.0275     | : 0.03 |
| fragment_664.3925 | : 0.03 |
| fragment_666.4075 | : 0.02 |
| fragment_109.0275 | : 0.01 |
| fragment_784.4325 | : 0.01 |
| loss_117.0225     | : 0.01 |
| fragment_664.3875 | : 0.01 |
| fragment_229.1625 | : 0.01 |
| fragment_127.0375 | : 0.01 |

motif\_617

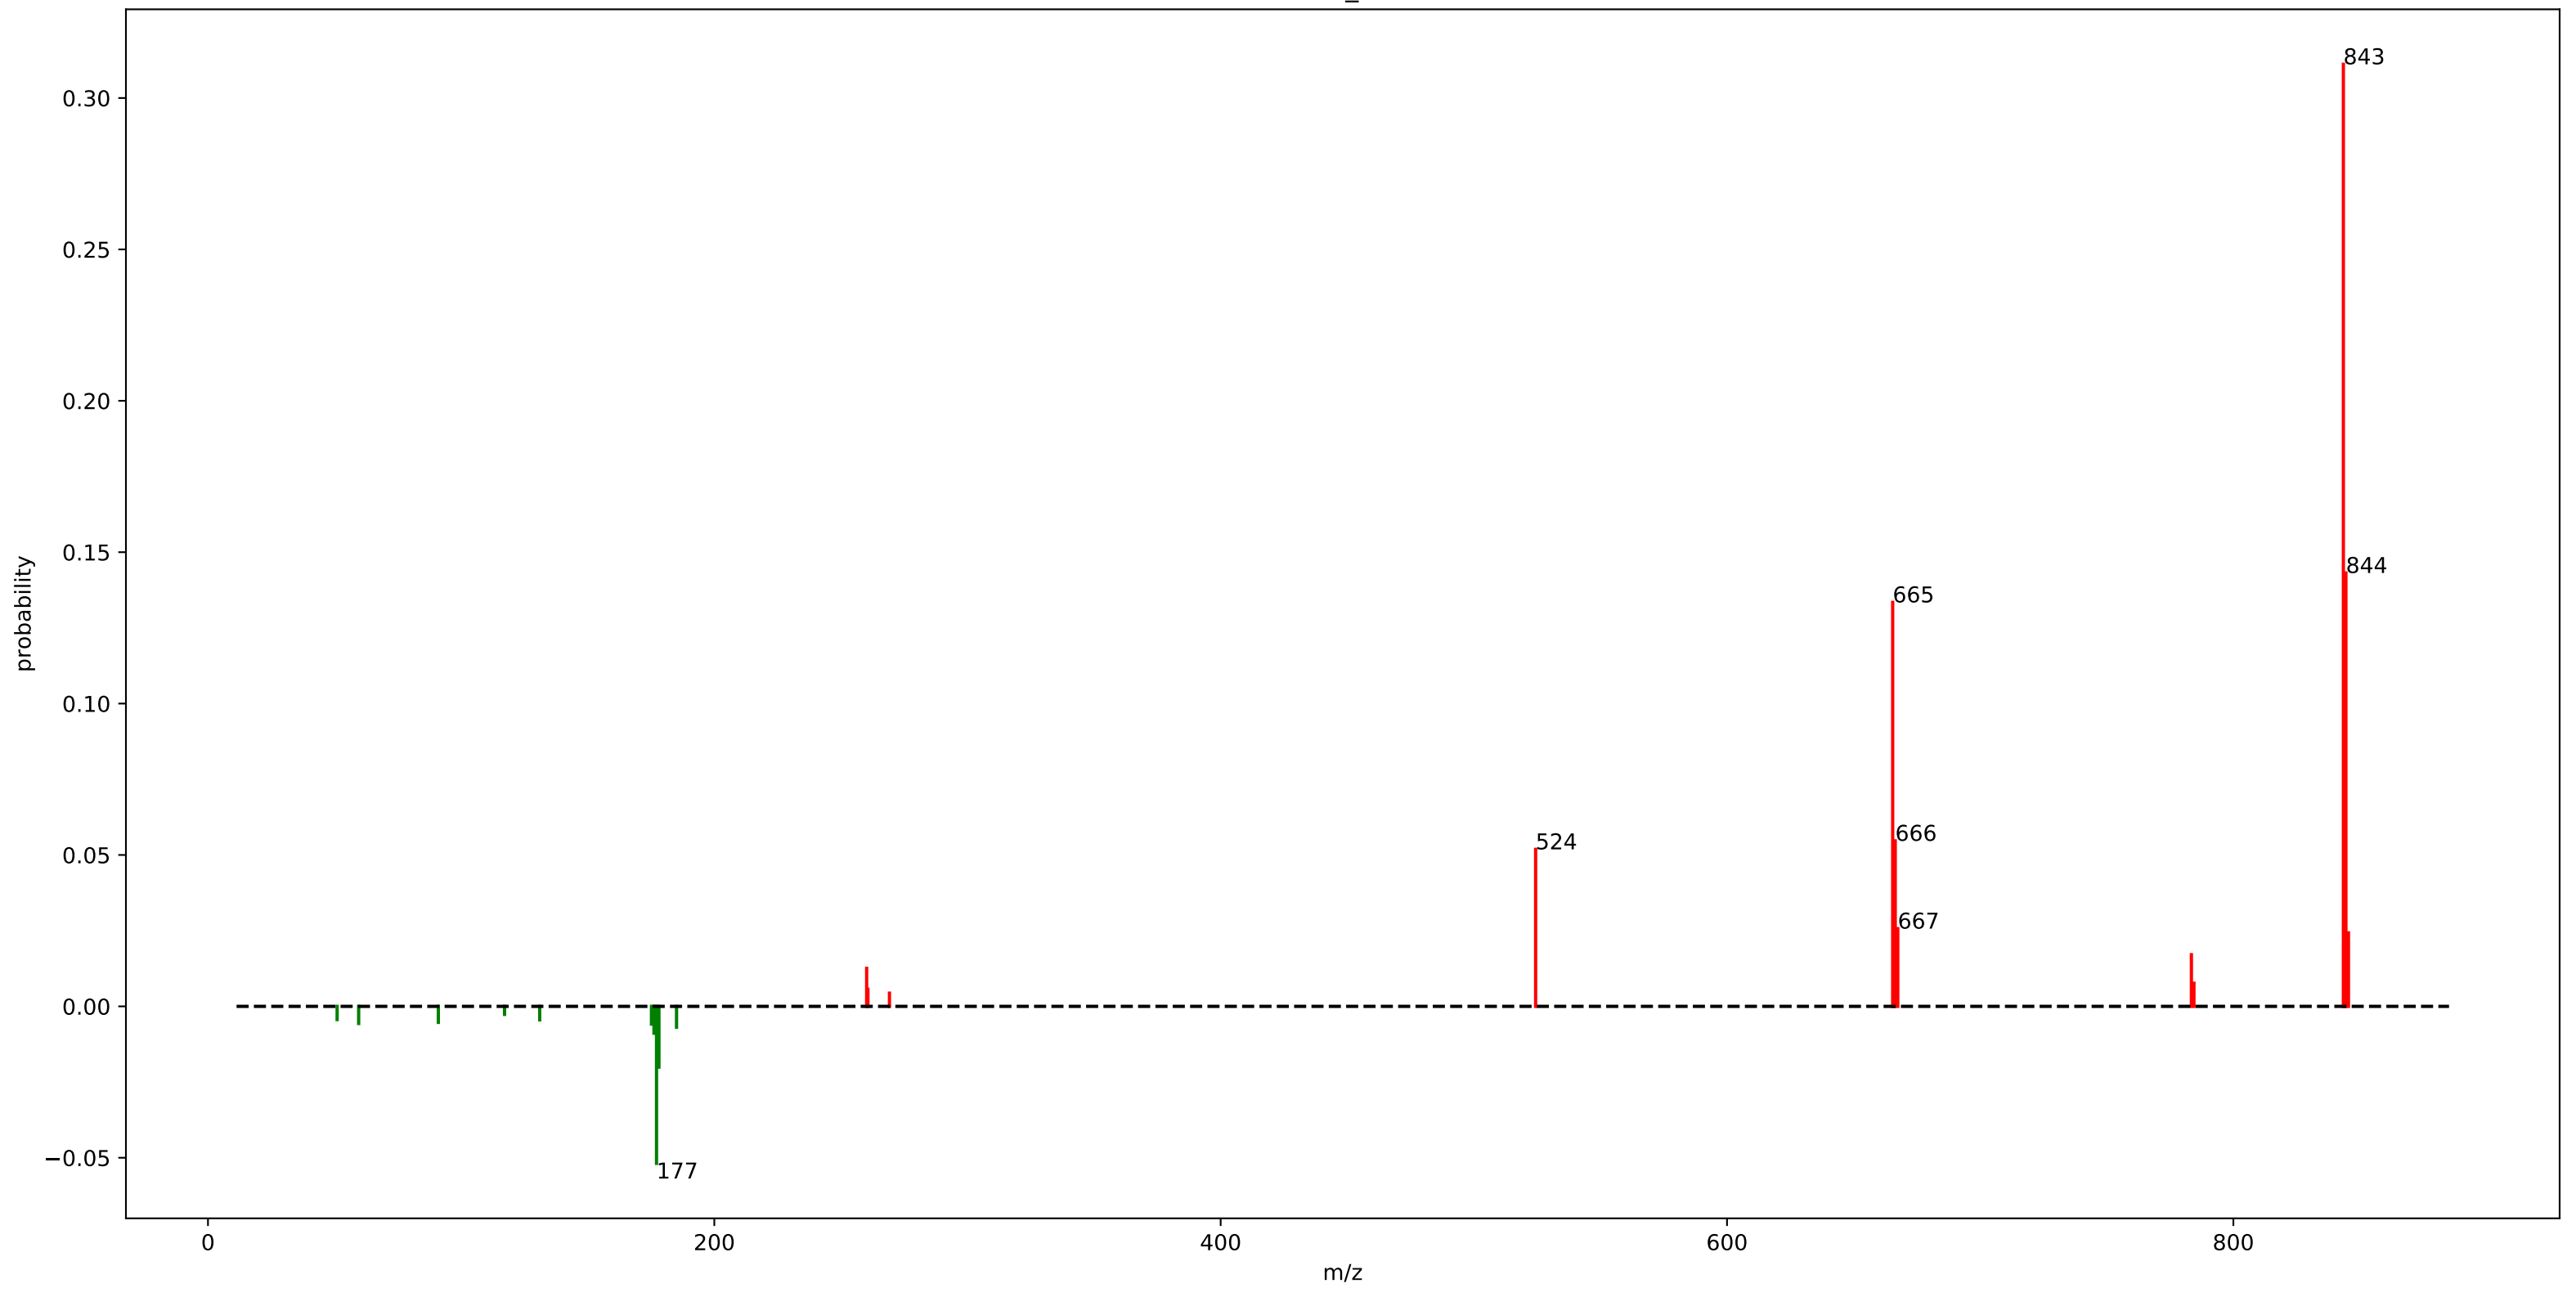

## motif\_617

|                   |        |
|-------------------|--------|
| fragment_843.4525 | : 0.31 |
| fragment_844.4525 | : 0.14 |
| fragment_665.4375 | : 0.13 |
| fragment_666.4425 | : 0.05 |
| loss_177.1675     | : 0.05 |
| fragment_524.4025 | : 0.05 |
| fragment_667.4425 | : 0.03 |
| fragment_845.4575 | : 0.02 |
| loss_178.1175     | : 0.02 |
| fragment_783.4275 | : 0.02 |
| fragment_260.1675 | : 0.01 |
| loss_176.1675     | : 0.01 |
| fragment_784.4325 | : 0.01 |
| loss_185.0725     | : 0.01 |
| loss_175.1725     | : 0.01 |
| fragment_260.6725 | : 0.01 |
| loss_59.5175      | : 0.01 |
| loss_90.9925      | : 0.01 |

gnps\_motif\_20.m2m

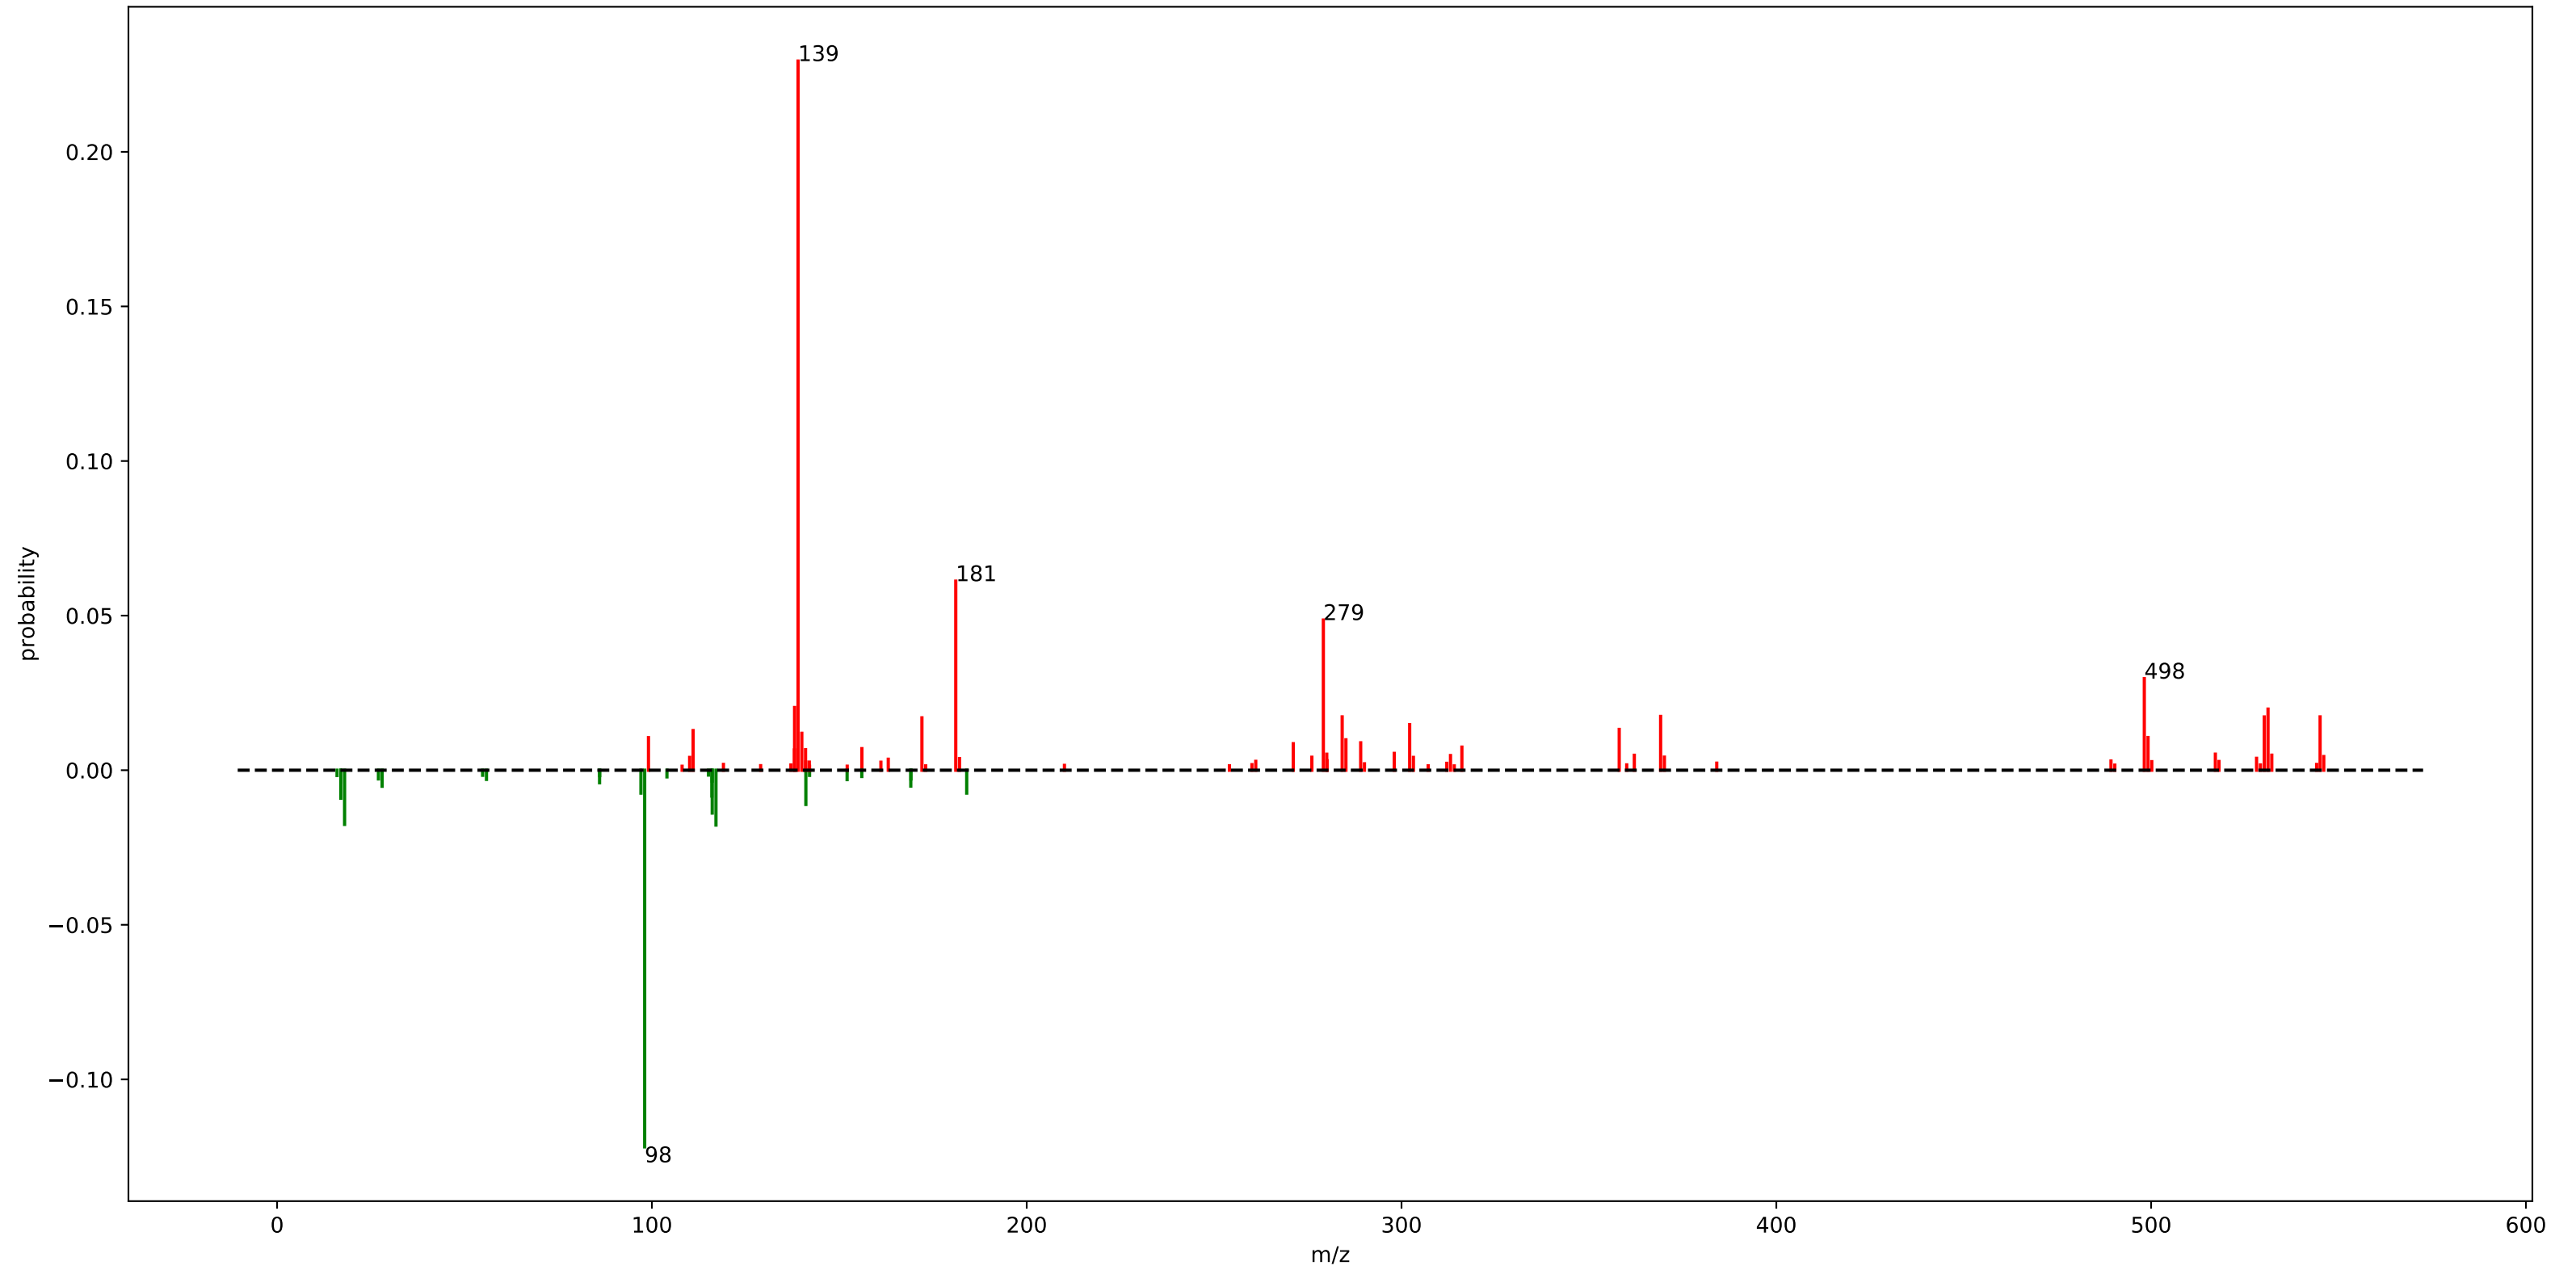

## gnps\_motif\_20.m2m

|                   |        |                   |        |
|-------------------|--------|-------------------|--------|
| fragment_138.9925 | : 0.23 | fragment_499.1775 | : 0.01 |
| loss_98.0725      | : 0.12 | fragment_99.0825  | : 0.01 |
| fragment_181.0725 | : 0.06 | fragment_285.1675 | : 0.01 |
| fragment_279.1475 | : 0.05 | loss_17.0075      | : 0.01 |
| fragment_498.1775 | : 0.03 | fragment_289.1075 | : 0.01 |
| fragment_138.0675 | : 0.02 | fragment_271.1125 | : 0.01 |
| fragment_531.1875 | : 0.02 | loss_116.0025     | : 0.01 |
| loss_117.0925     | : 0.02 | fragment_316.1075 | : 0.01 |
| loss_18.0075      | : 0.02 | loss_97.0725      | : 0.01 |
| fragment_369.1325 | : 0.02 | loss_183.9925     | : 0.01 |
| fragment_545.0825 | : 0.02 | fragment_156.0225 | : 0.01 |
| fragment_284.1675 | : 0.02 | fragment_140.9925 | : 0.01 |
| fragment_530.1925 | : 0.02 | fragment_138.0125 | : 0.01 |
| fragment_172.0425 | : 0.02 | fragment_298.0625 | : 0.01 |
| fragment_302.1775 | : 0.01 | loss_28.0175      | : 0.01 |
| loss_116.0925     | : 0.01 | fragment_517.1375 | : 0.01 |
| fragment_358.0825 | : 0.01 | fragment_280.0575 | : 0.01 |
| fragment_110.9975 | : 0.01 | loss_169.0725     | : 0.01 |
| fragment_139.9975 | : 0.01 |                   |        |
| loss_141.0775     | : 0.01 |                   |        |

motif\_611

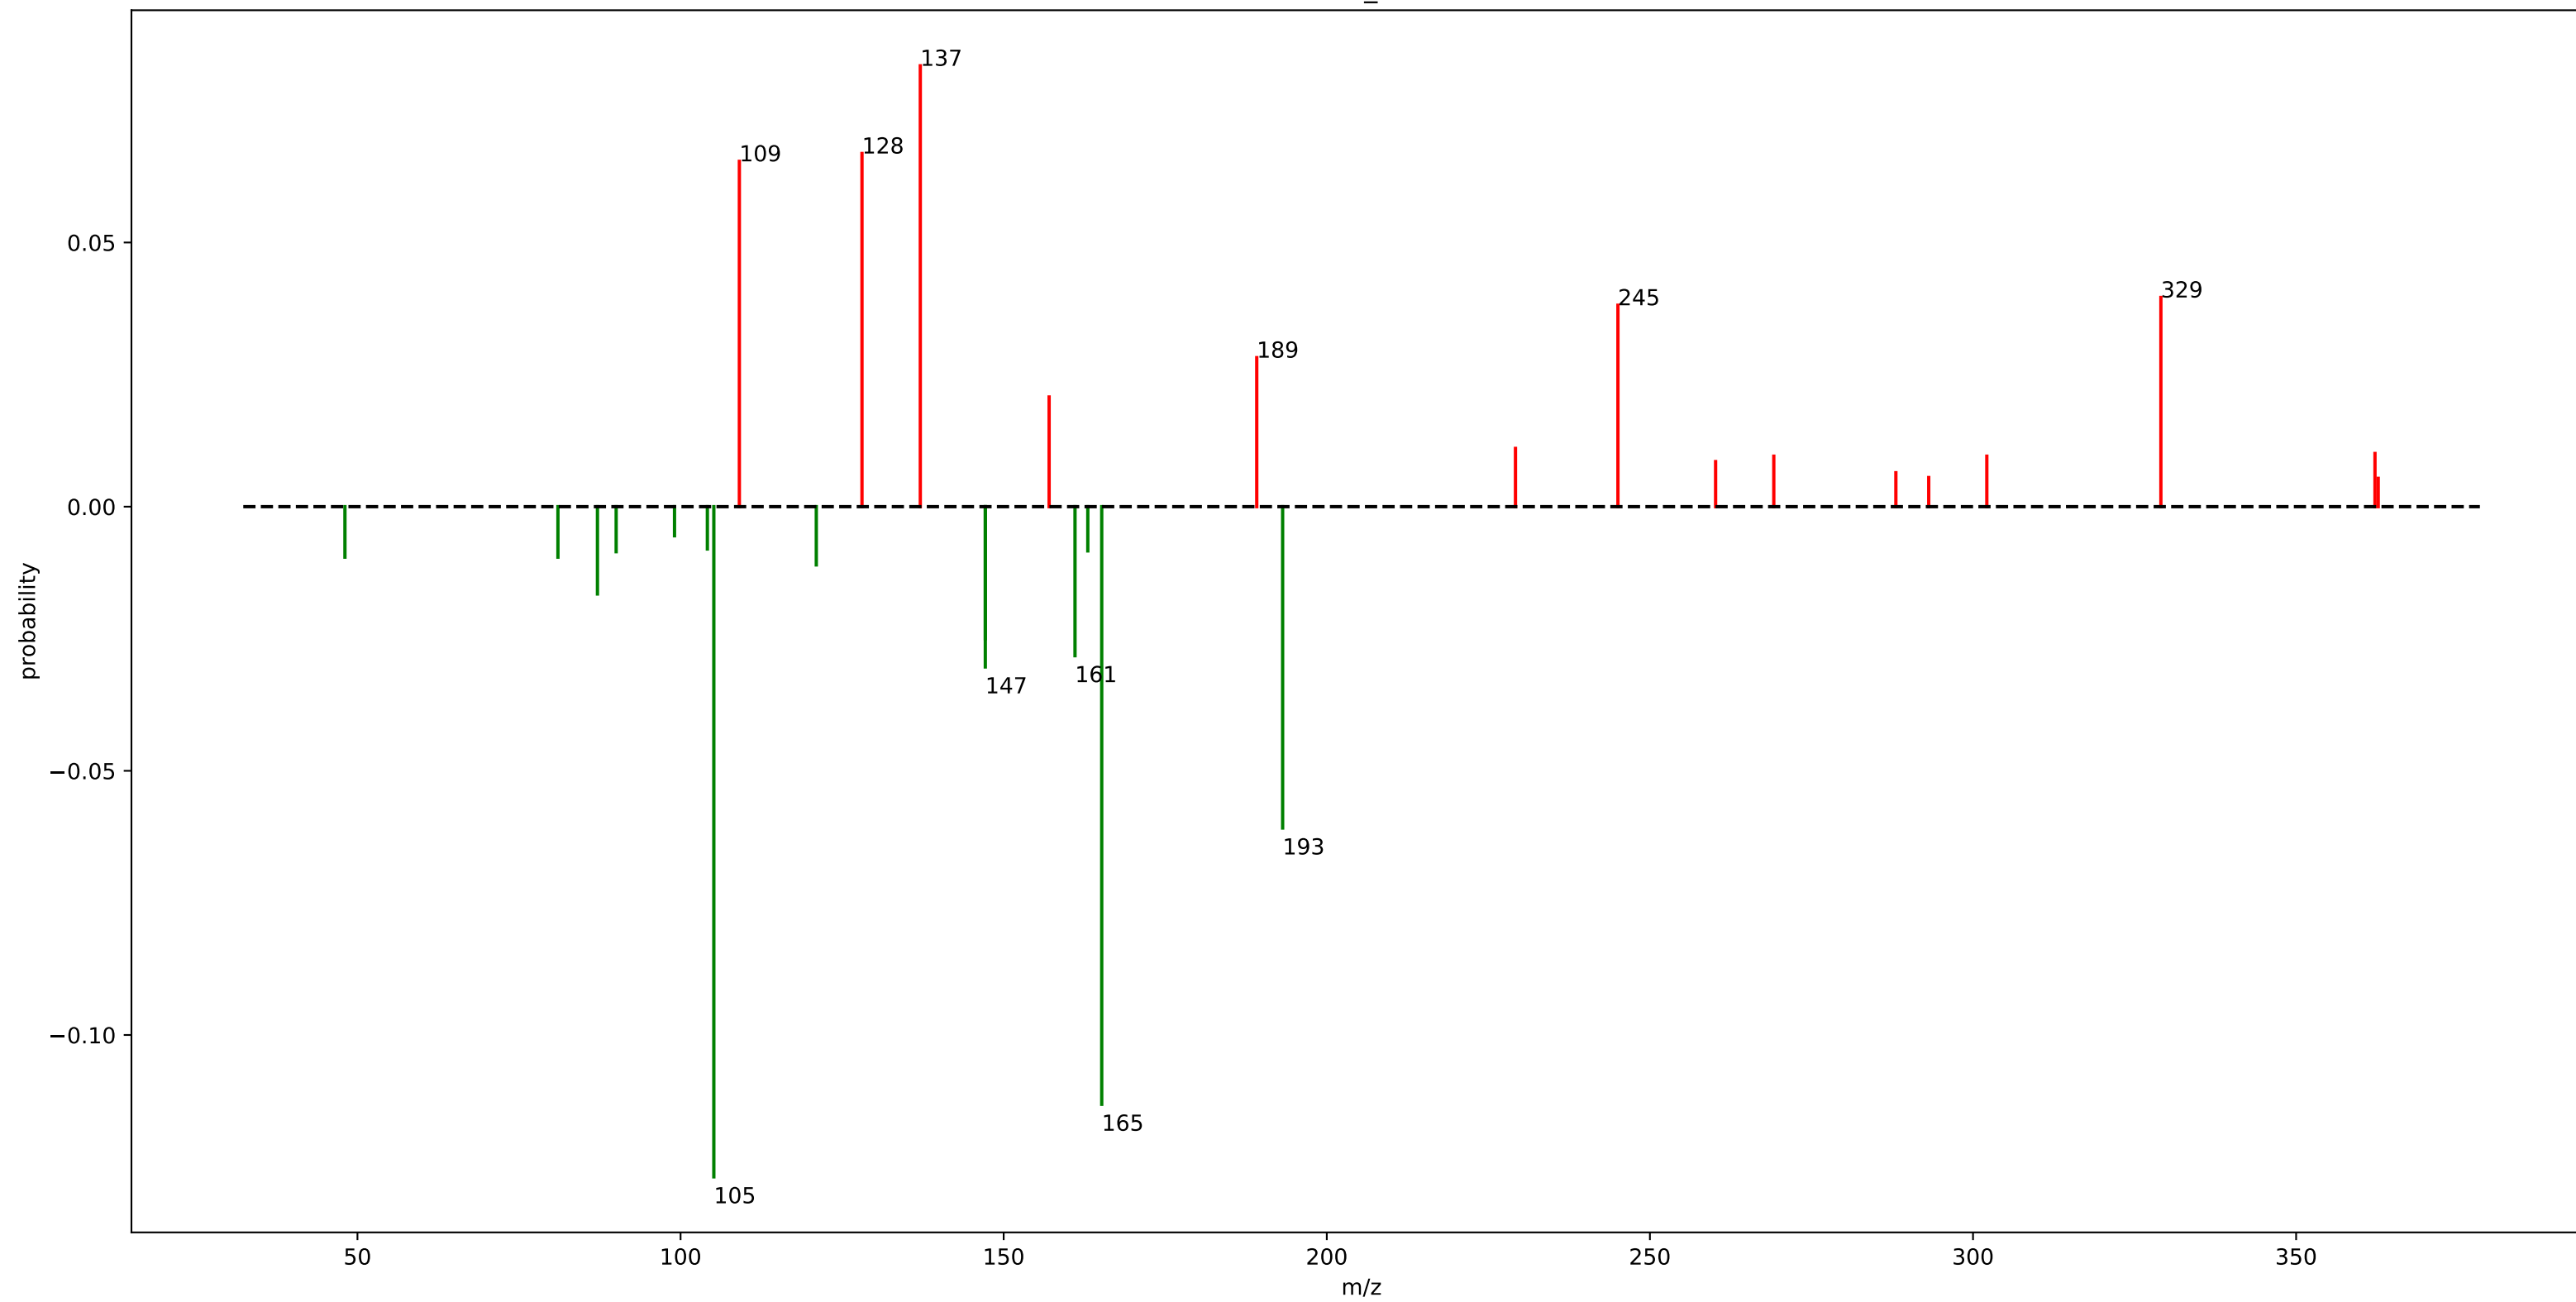

## motif\_611

|                   |        |                   |        |
|-------------------|--------|-------------------|--------|
| loss_105.1475     | : 0.13 | loss_81.0225      | : 0.01 |
| loss_165.1725     | : 0.11 | loss_90.0325      | : 0.01 |
| fragment_137.0975 | : 0.08 | fragment_260.1675 | : 0.01 |
| fragment_128.0725 | : 0.07 | loss_163.0175     | : 0.01 |
| fragment_109.0975 | : 0.07 | loss_104.1475     | : 0.01 |
| loss_193.1675     | : 0.06 | fragment_288.0625 | : 0.01 |
| fragment_329.0725 | : 0.04 | fragment_293.1475 | : 0.01 |
| fragment_245.0525 | : 0.04 | loss_99.0625      | : 0.01 |
| loss_147.1575     | : 0.03 | fragment_362.7025 | : 0.01 |
| loss_161.0375     | : 0.03 |                   |        |
| fragment_189.1625 | : 0.03 |                   |        |
| loss_147.1625     | : 0.02 |                   |        |
| fragment_157.0325 | : 0.02 |                   |        |
| loss_87.1375      | : 0.02 |                   |        |
| loss_121.0025     | : 0.01 |                   |        |
| fragment_229.1975 | : 0.01 |                   |        |
| fragment_362.2025 | : 0.01 |                   |        |
| loss_48.0625      | : 0.01 |                   |        |
| fragment_302.1375 | : 0.01 |                   |        |
| fragment_269.1725 | : 0.01 |                   |        |



motif\_599

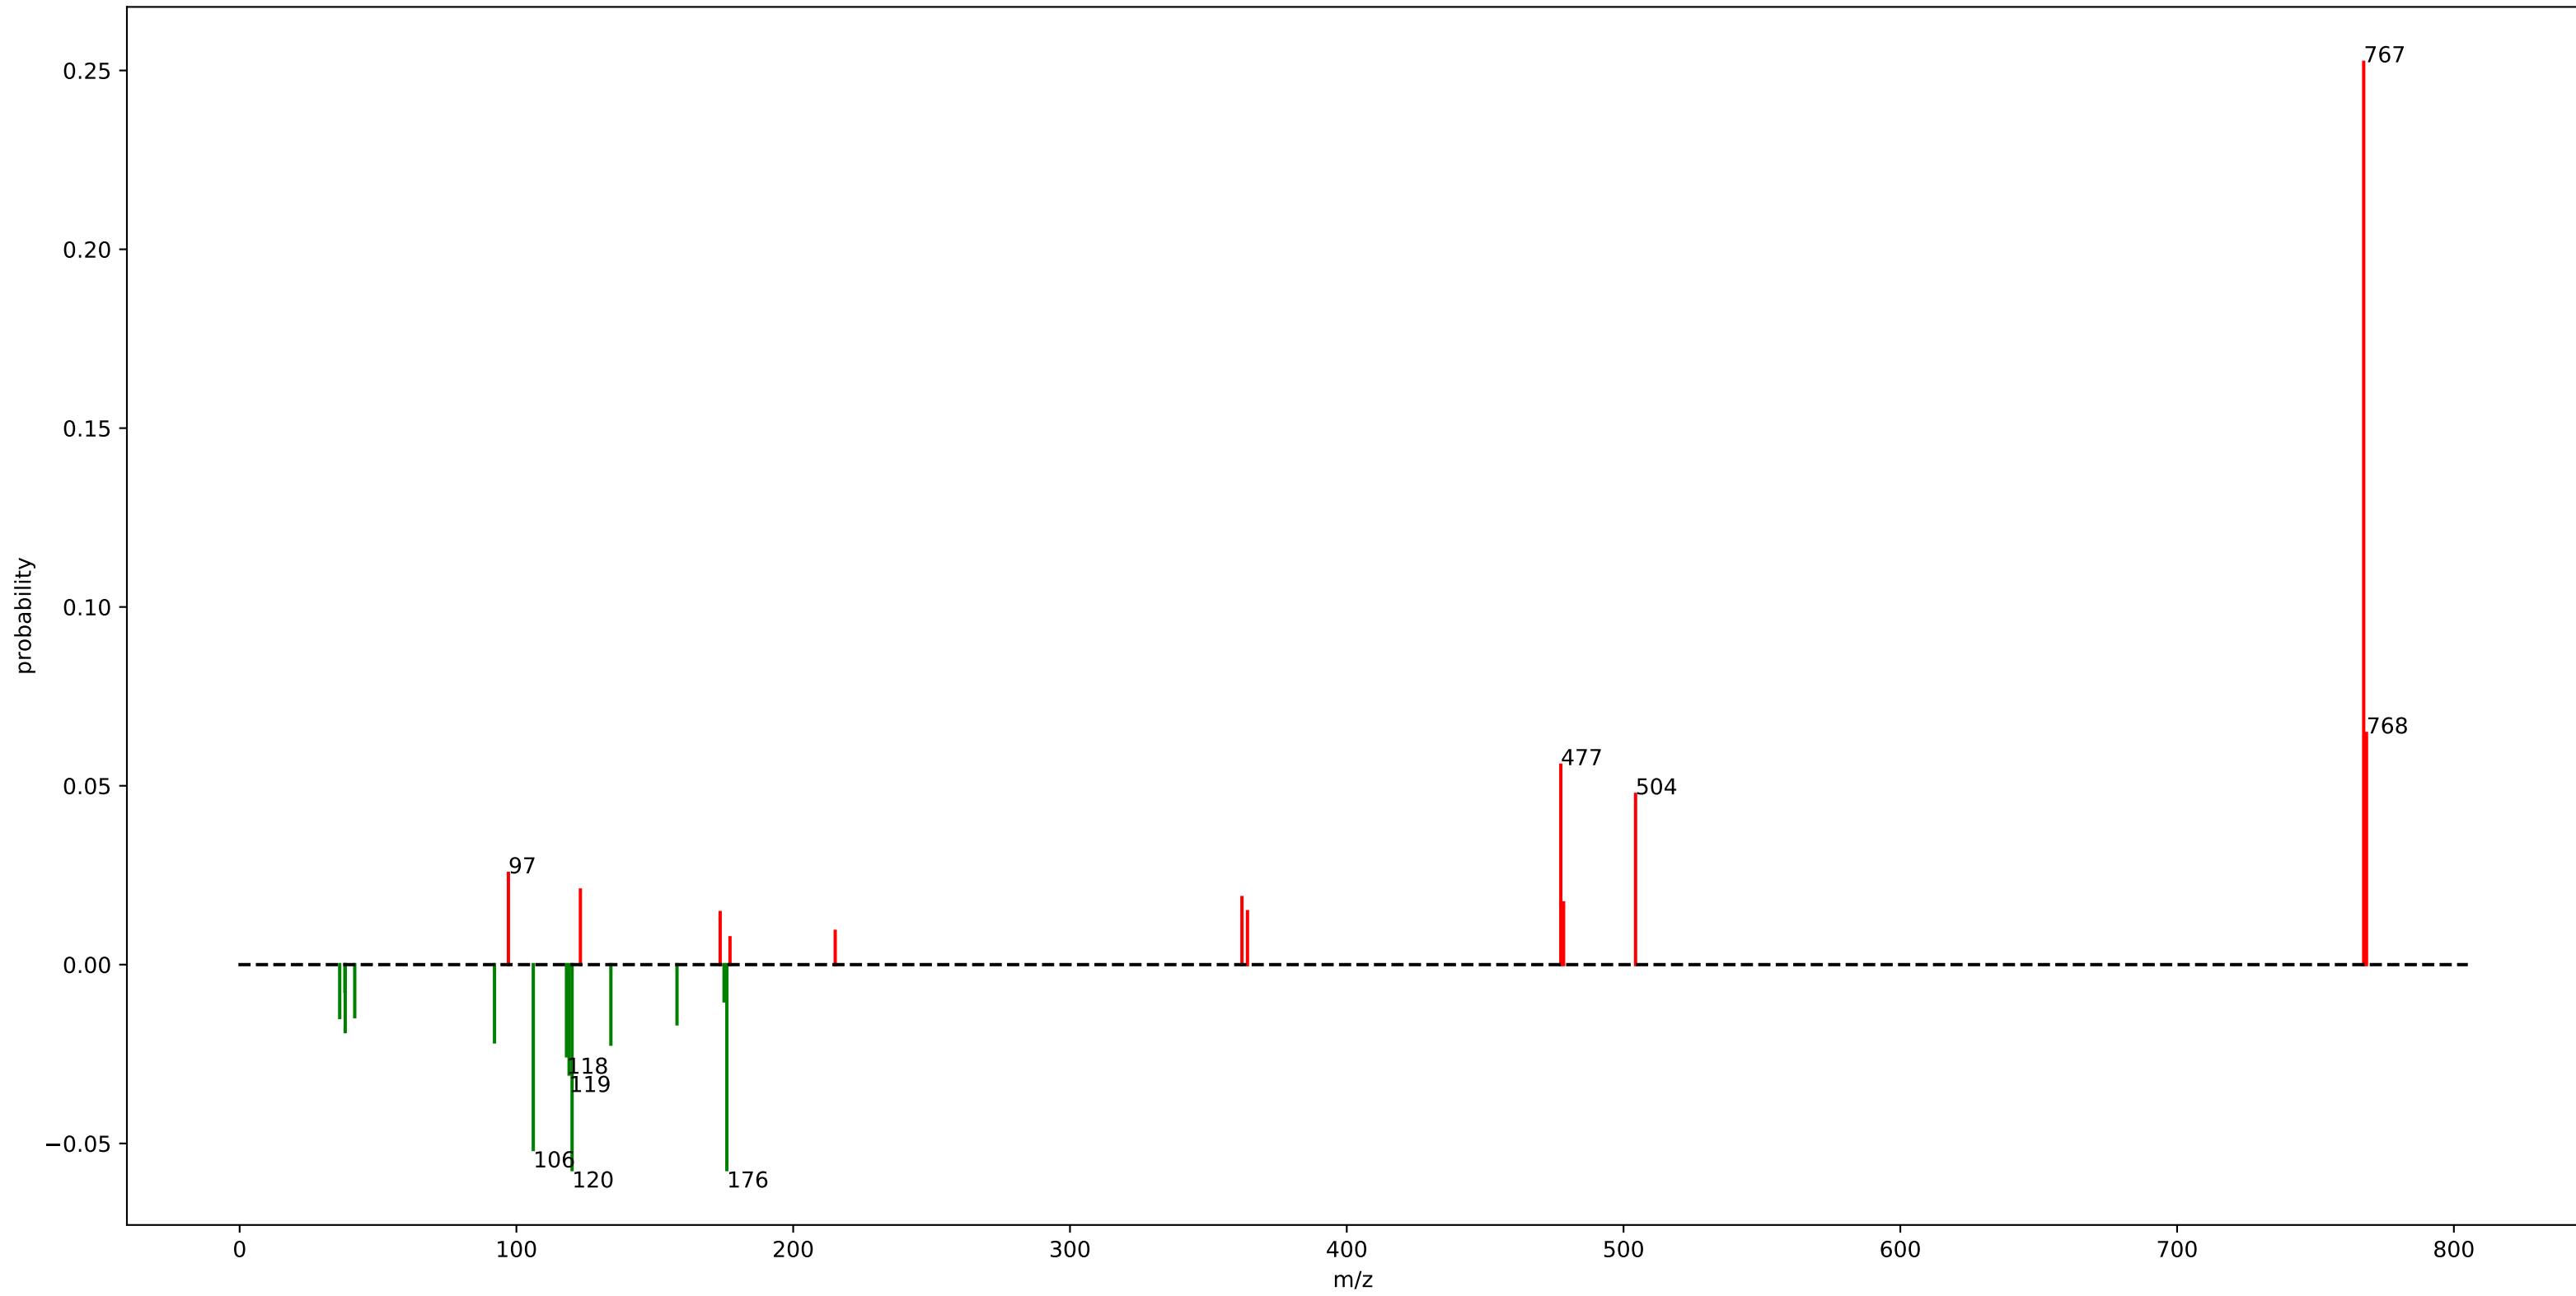

## motif\_599

|                   |        |                   |        |
|-------------------|--------|-------------------|--------|
| fragment_767.4225 | : 0.25 | loss_41.5875      | : 0.01 |
| fragment_768.4225 | : 0.06 | loss_175.0225     | : 0.01 |
| loss_120.1125     | : 0.06 | fragment_215.1775 | : 0.01 |
| loss_176.0275     | : 0.06 | loss_38.0375      | : 0.01 |
| fragment_477.3325 | : 0.06 | fragment_177.1625 | : 0.01 |
| loss_106.0975     | : 0.05 |                   |        |
| fragment_504.3425 | : 0.05 |                   |        |
| loss_119.0375     | : 0.03 |                   |        |
| loss_118.0975     | : 0.03 |                   |        |
| fragment_97.1025  | : 0.03 |                   |        |
| loss_134.1325     | : 0.02 |                   |        |
| loss_92.0825      | : 0.02 |                   |        |
| fragment_123.1175 | : 0.02 |                   |        |
| fragment_362.1275 | : 0.02 |                   |        |
| loss_38.1525      | : 0.02 |                   |        |
| fragment_478.3375 | : 0.02 |                   |        |
| loss_158.0175     | : 0.02 |                   |        |
| fragment_364.1275 | : 0.01 |                   |        |
| loss_36.1575      | : 0.01 |                   |        |
| fragment_173.6125 | : 0.01 |                   |        |

motif\_598

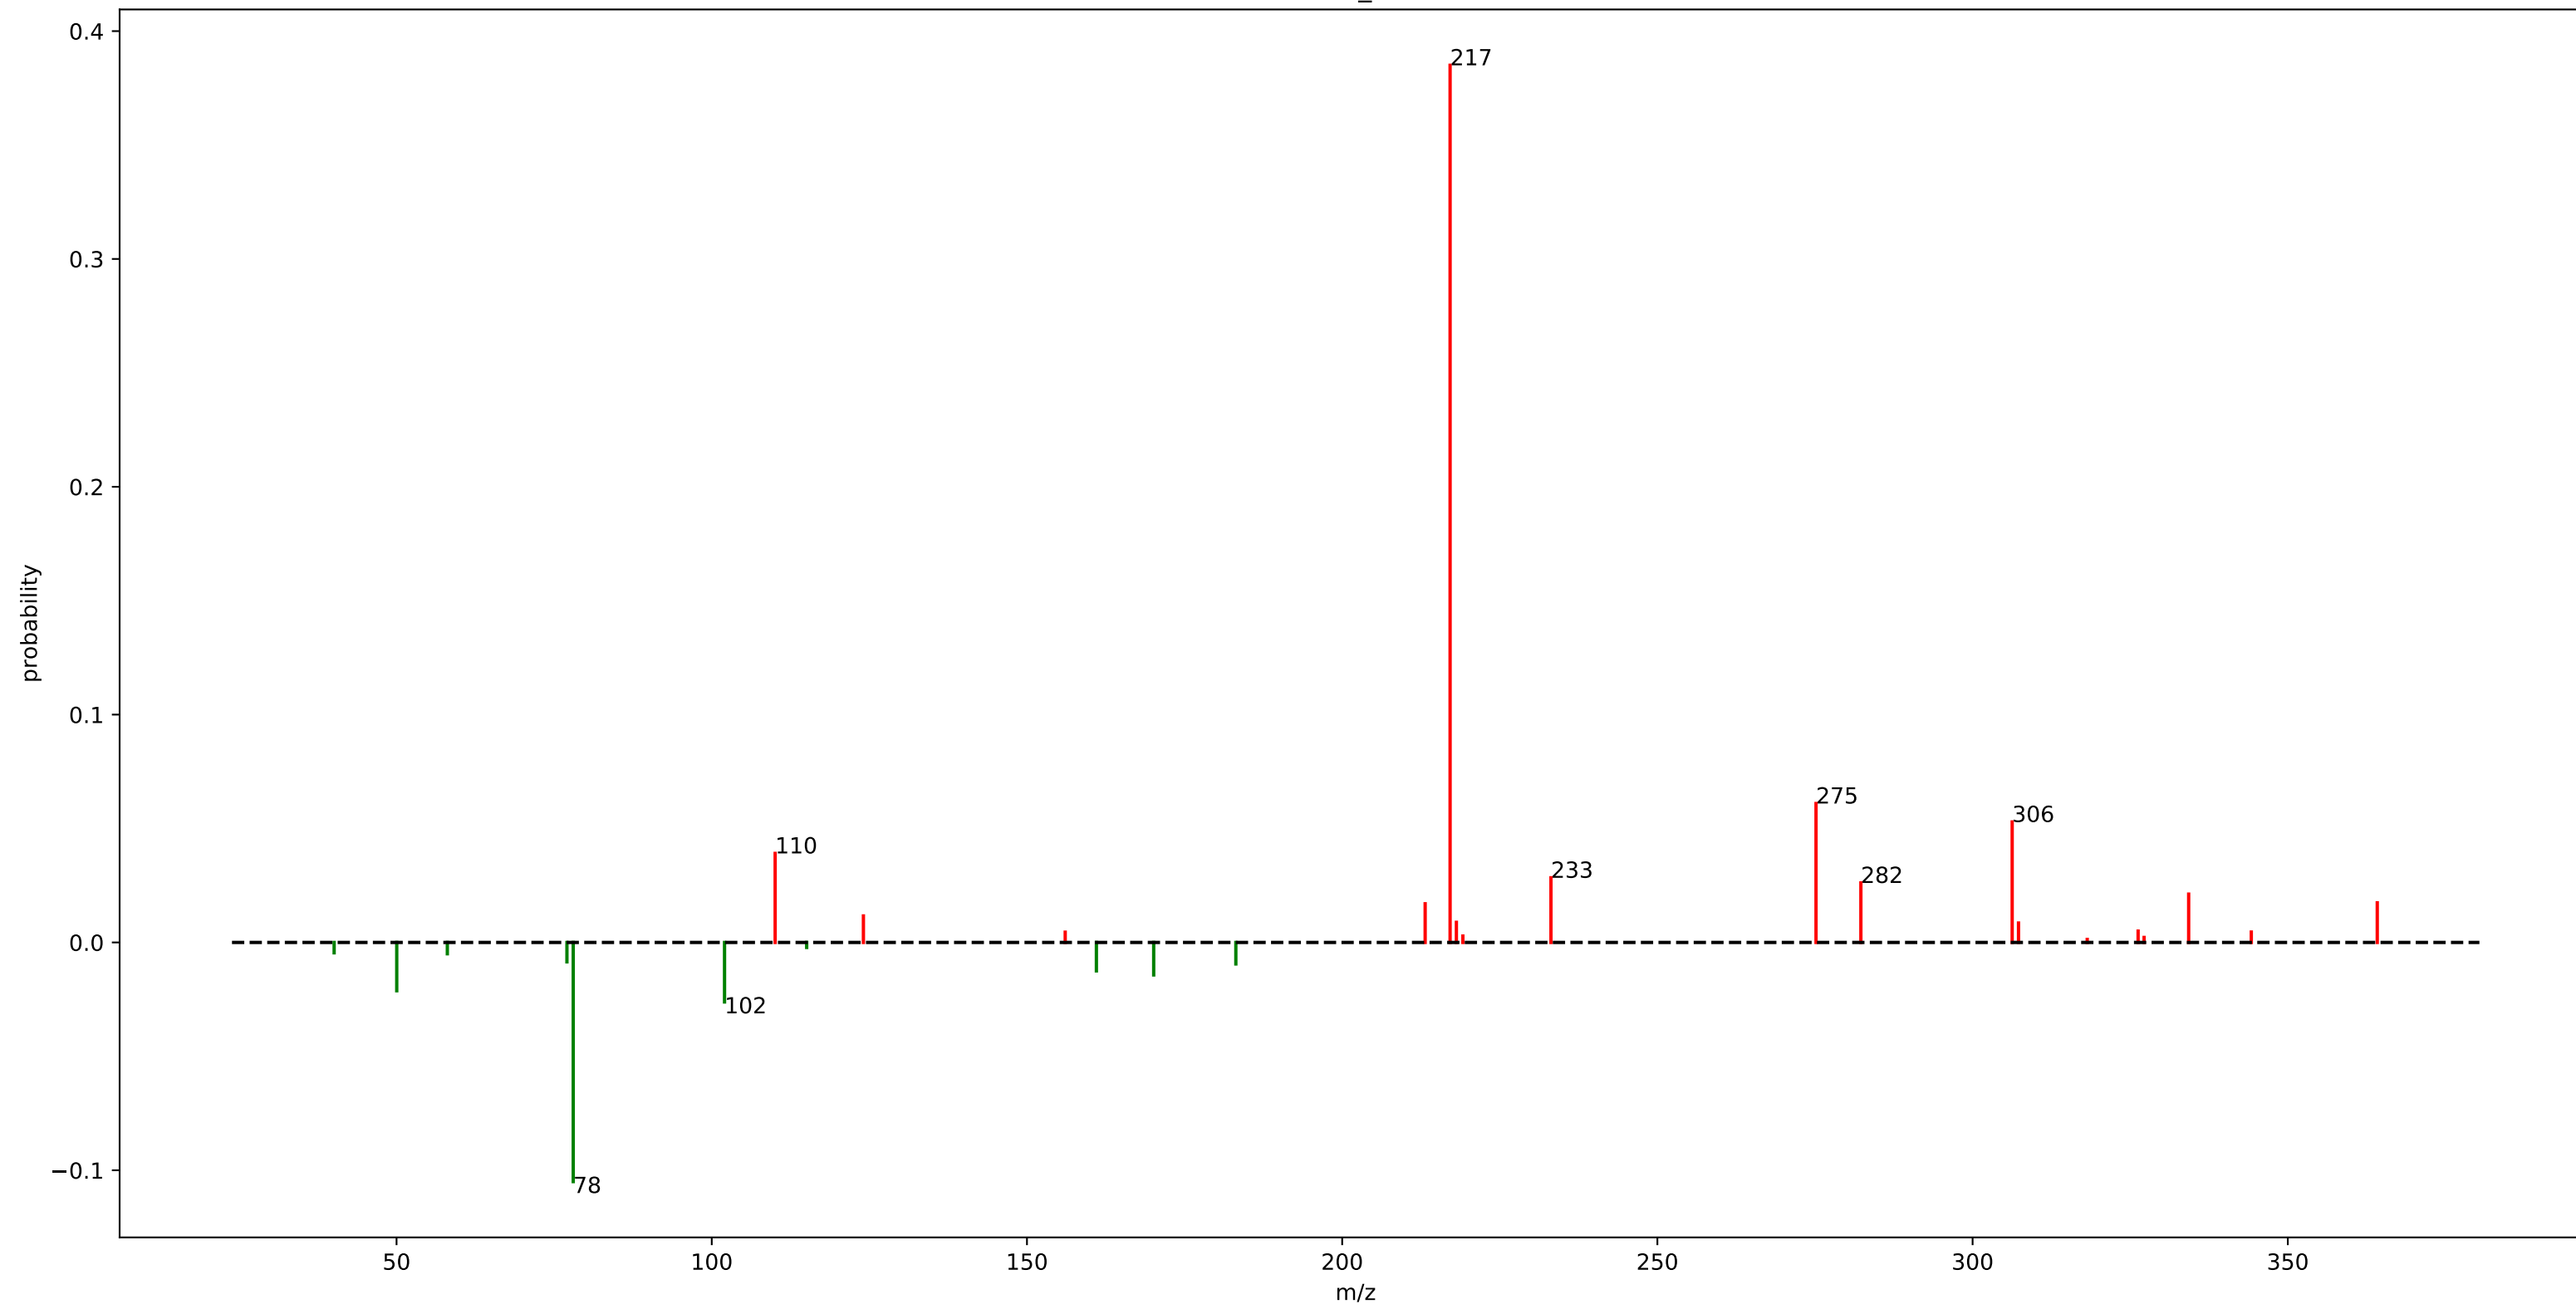

## motif\_598

|                   |        |
|-------------------|--------|
| fragment_217.1175 | : 0.39 |
| loss_78.0275      | : 0.10 |
| fragment_275.1625 | : 0.06 |
| fragment_306.2775 | : 0.05 |
| fragment_110.0575 | : 0.04 |
| fragment_233.1175 | : 0.03 |
| loss_102.0275     | : 0.03 |
| fragment_282.2775 | : 0.03 |
| fragment_334.2725 | : 0.02 |
| loss_50.0325      | : 0.02 |
| fragment_364.1875 | : 0.02 |
| fragment_213.1625 | : 0.02 |
| loss_170.1025     | : 0.01 |
| loss_161.0125     | : 0.01 |
| fragment_124.0575 | : 0.01 |
| loss_183.1325     | : 0.01 |
| fragment_218.1175 | : 0.01 |
| fragment_307.2825 | : 0.01 |
| loss_77.0275      | : 0.01 |

motif\_664

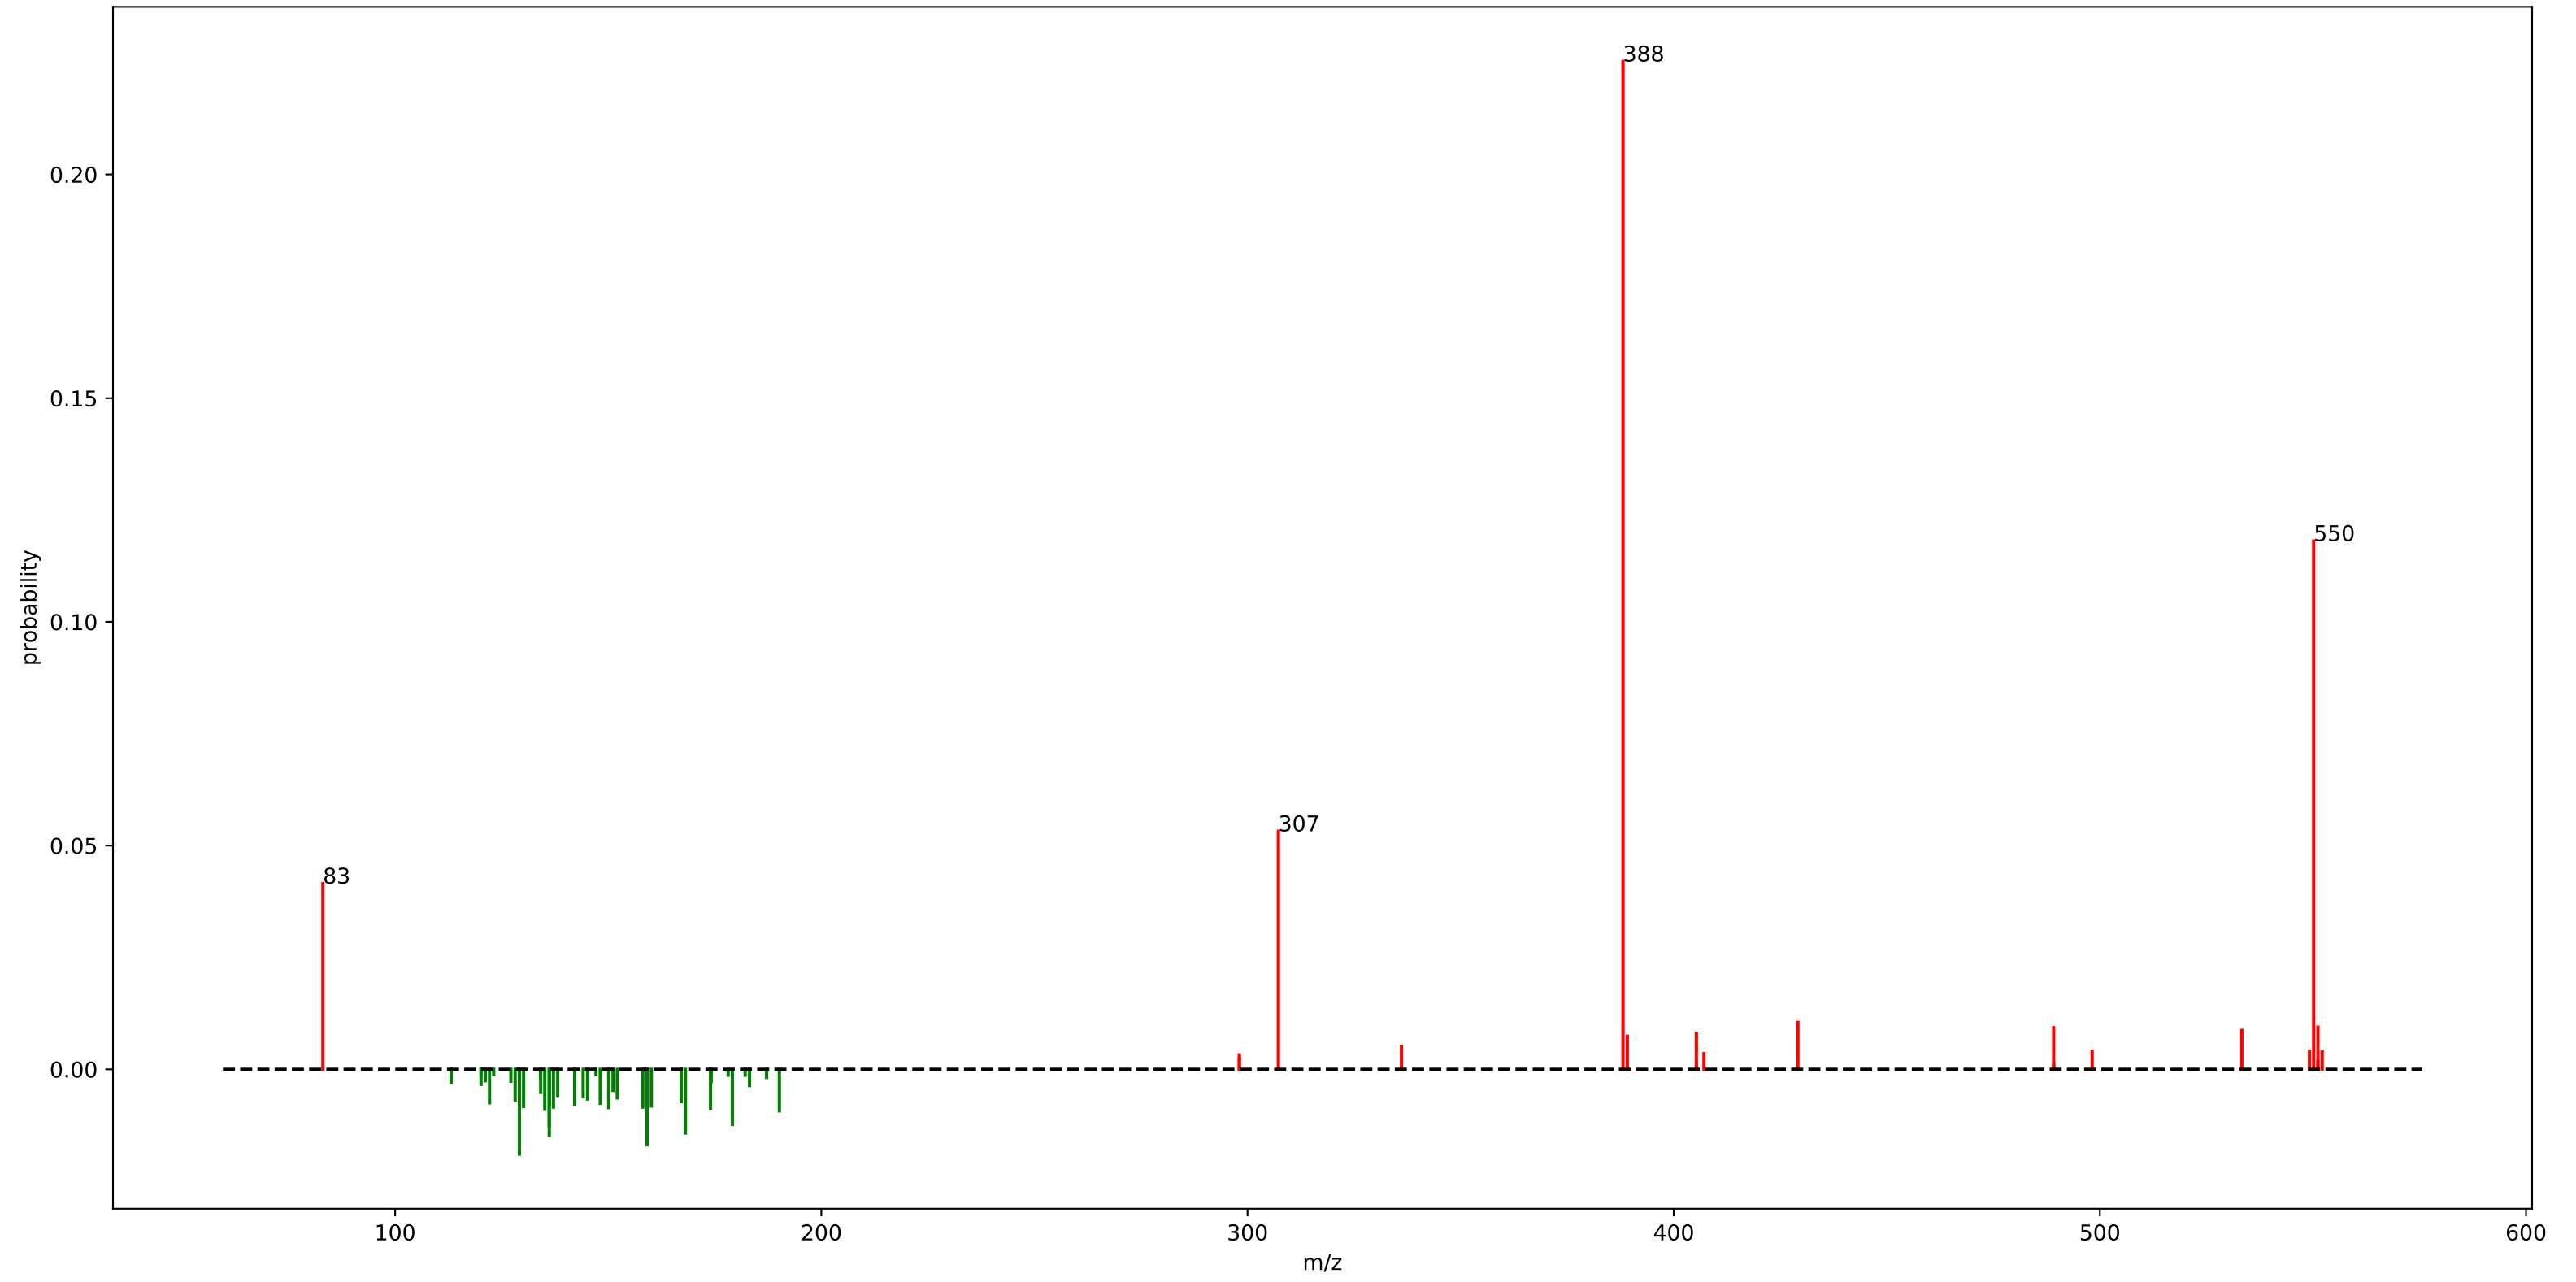

# motif\_664

|                   |        |                   |        |
|-------------------|--------|-------------------|--------|
| fragment_388.1075 | : 0.23 | loss_130.1425     | : 0.01 |
| fragment_550.1625 | : 0.12 | loss_160.1125     | : 0.01 |
| fragment_307.2425 | : 0.05 | fragment_405.3175 | : 0.01 |
| fragment_83.0475  | : 0.04 | loss_142.1225     | : 0.01 |
| loss_129.1525     | : 0.02 | loss_148.1225     | : 0.01 |
| loss_159.1075     | : 0.02 | loss_122.1475     | : 0.01 |
| loss_136.1625     | : 0.01 | fragment_389.1125 | : 0.01 |
| loss_168.1125     | : 0.01 | loss_167.1075     | : 0.01 |
| loss_136.1475     | : 0.01 | loss_128.1525     | : 0.01 |
| loss_179.1225     | : 0.01 | loss_145.1375     | : 0.01 |
| fragment_429.1375 | : 0.01 | loss_152.1175     | : 0.01 |
| fragment_551.1675 | : 0.01 | loss_144.1175     | : 0.01 |
| loss_190.1525     | : 0.01 | loss_138.1475     | : 0.01 |
| fragment_489.1625 | : 0.01 | loss_134.1525     | : 0.01 |
| loss_135.1125     | : 0.01 | fragment_336.1275 | : 0.01 |
| fragment_533.3125 | : 0.01 |                   |        |
| loss_174.0025     | : 0.01 |                   |        |
| loss_150.1025     | : 0.01 |                   |        |
| loss_158.1125     | : 0.01 |                   |        |
| loss_137.1425     | : 0.01 |                   |        |

euphorbia\_motif\_403.m2m

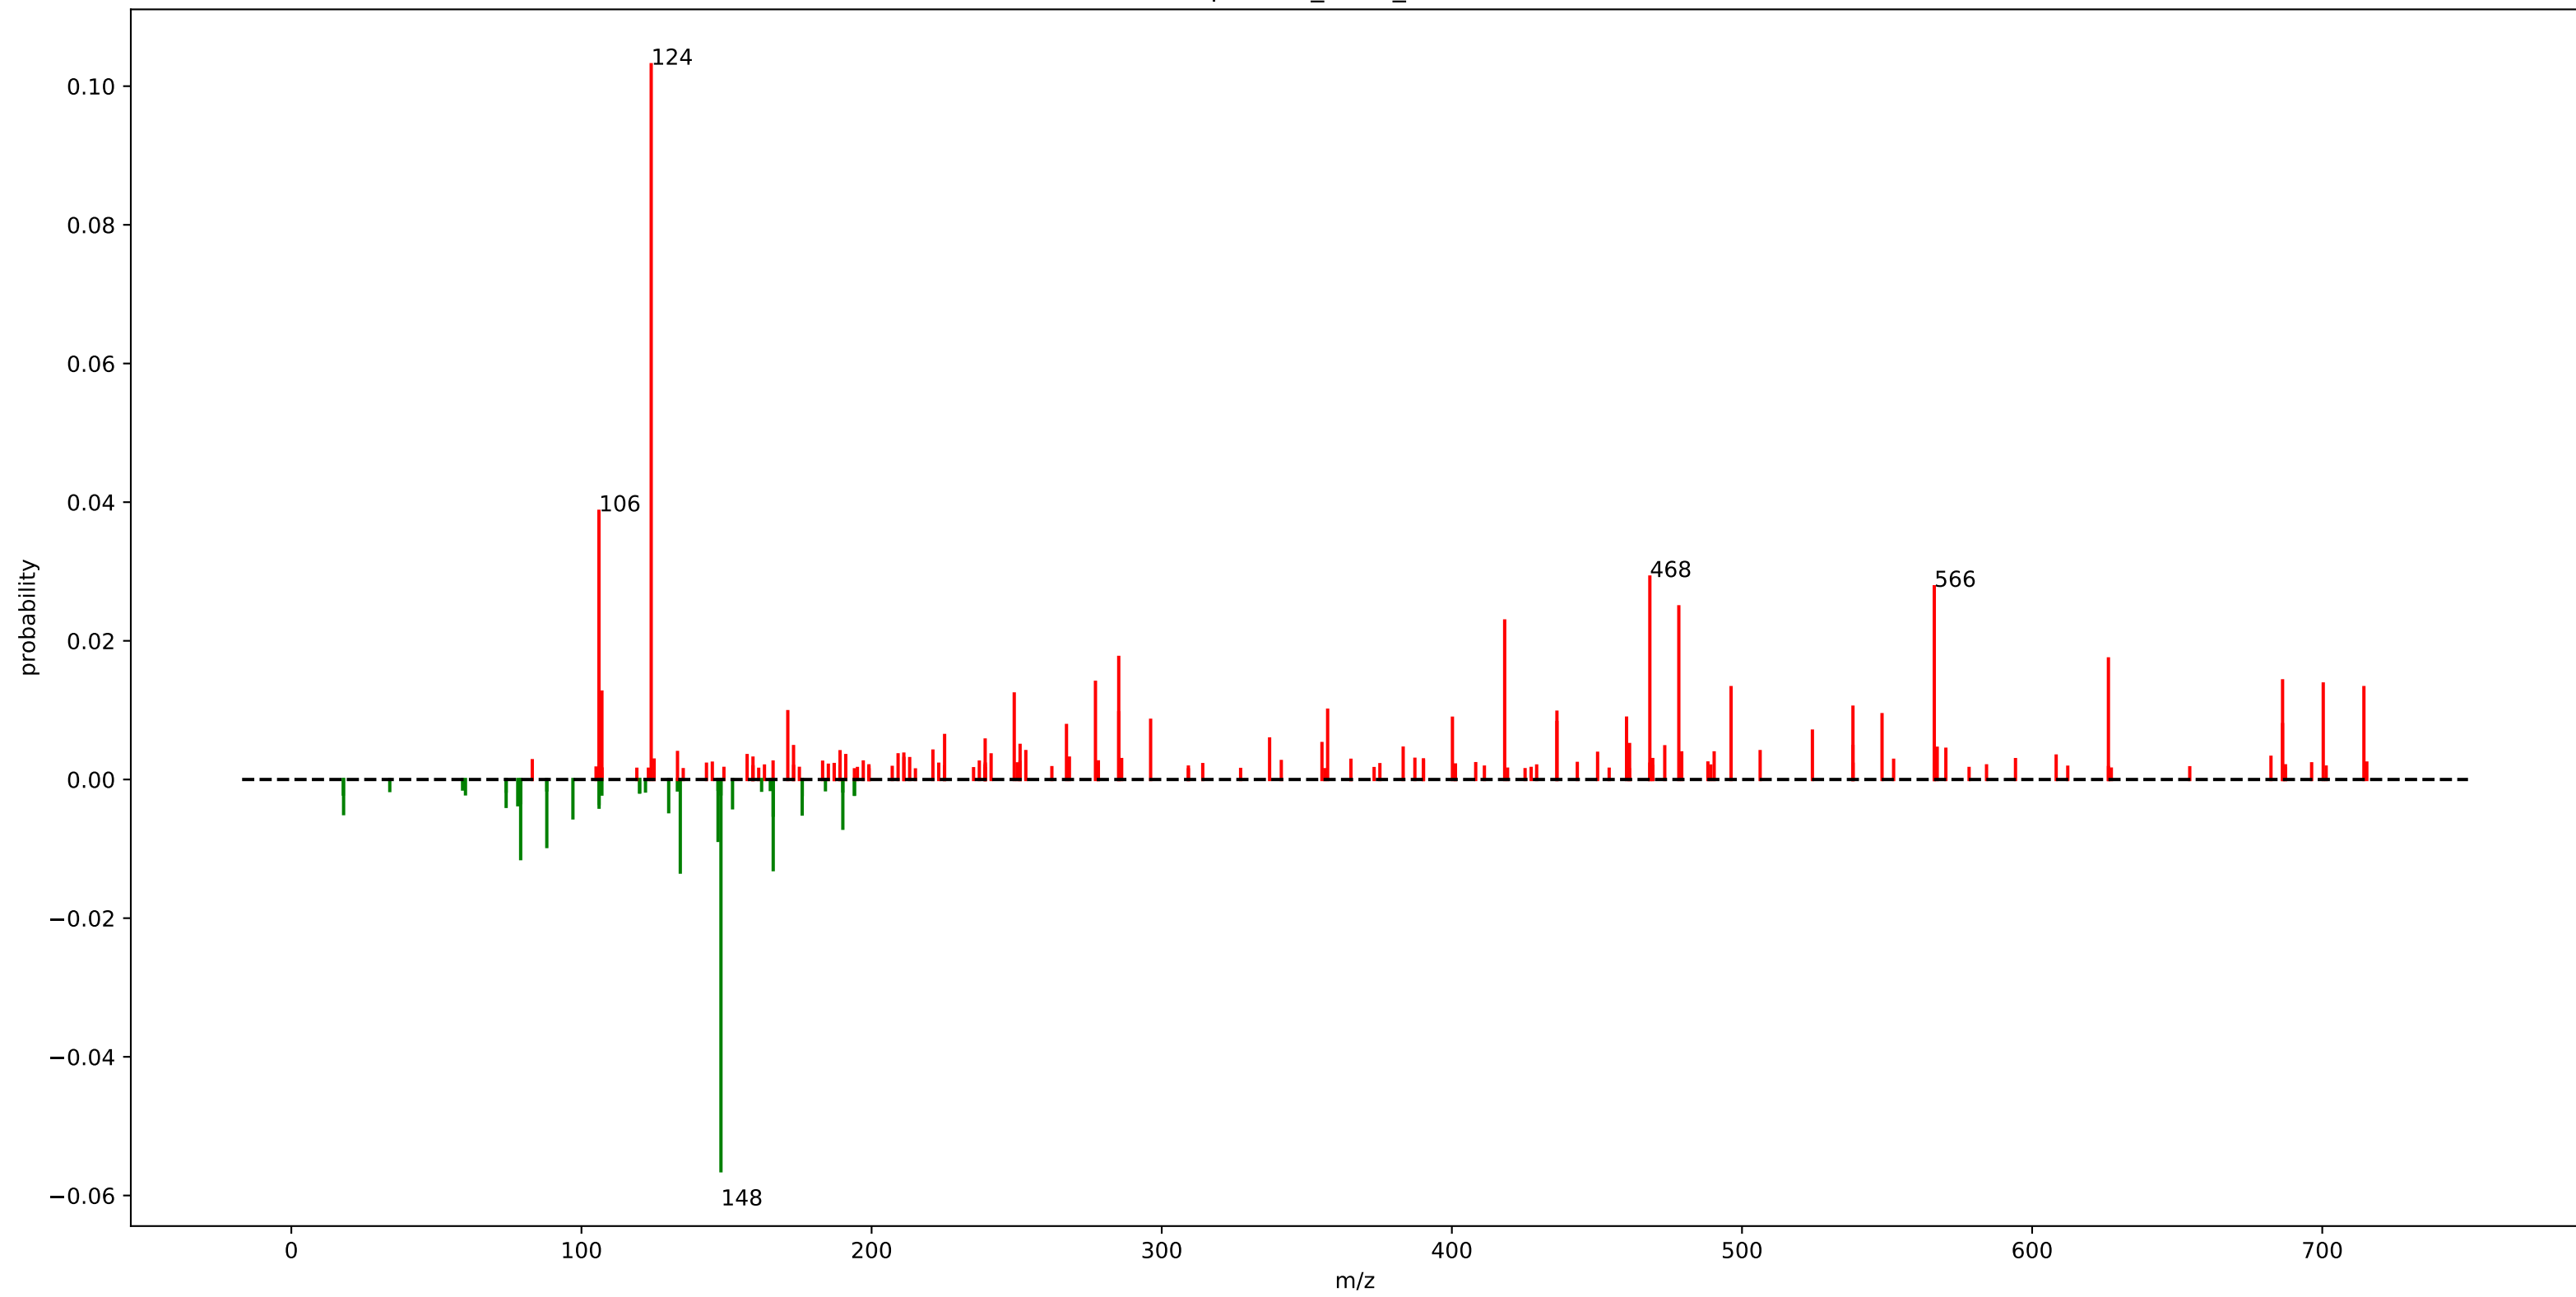

# euphorbia\_motif\_403.m2m

|                   |        |                   |        |                   |        |
|-------------------|--------|-------------------|--------|-------------------|--------|
| fragment_124.0375 | : 0.10 | fragment_357.1825 | : 0.01 | loss_166.0825     | : 0.01 |
| loss_148.0775     | : 0.06 | fragment_171.1175 | : 0.01 | fragment_461.2525 | : 0.01 |
| fragment_106.0275 | : 0.04 | fragment_436.2125 | : 0.01 |                   |        |
| fragment_468.2375 | : 0.03 | loss_88.0575      | : 0.01 |                   |        |
| fragment_566.2725 | : 0.03 | fragment_285.1875 | : 0.01 |                   |        |
| fragment_478.2225 | : 0.02 | fragment_548.2625 | : 0.01 |                   |        |
| fragment_418.2025 | : 0.02 | fragment_460.2125 | : 0.01 |                   |        |
| fragment_285.1825 | : 0.02 | fragment_400.1925 | : 0.01 |                   |        |
| fragment_626.2925 | : 0.02 | loss_147.0725     | : 0.01 |                   |        |
| fragment_686.3175 | : 0.01 | fragment_296.1725 | : 0.01 |                   |        |
| fragment_277.1575 | : 0.01 | fragment_436.2075 | : 0.01 |                   |        |
| fragment_700.3325 | : 0.01 | fragment_686.3125 | : 0.01 |                   |        |
| loss_134.0625     | : 0.01 | fragment_267.1725 | : 0.01 |                   |        |
| fragment_714.3475 | : 0.01 | loss_190.0875     | : 0.01 |                   |        |
| fragment_496.2325 | : 0.01 | fragment_524.2625 | : 0.01 |                   |        |
| loss_166.0875     | : 0.01 | fragment_225.1625 | : 0.01 |                   |        |
| fragment_107.0475 | : 0.01 | fragment_337.1775 | : 0.01 |                   |        |
| fragment_249.1625 | : 0.01 | fragment_239.1425 | : 0.01 |                   |        |
| loss_79.0475      | : 0.01 | loss_97.0575      | : 0.01 |                   |        |
| fragment_538.2425 | : 0.01 | fragment_355.2225 | : 0.01 |                   |        |



urine\_mass2motif\_236.m2m

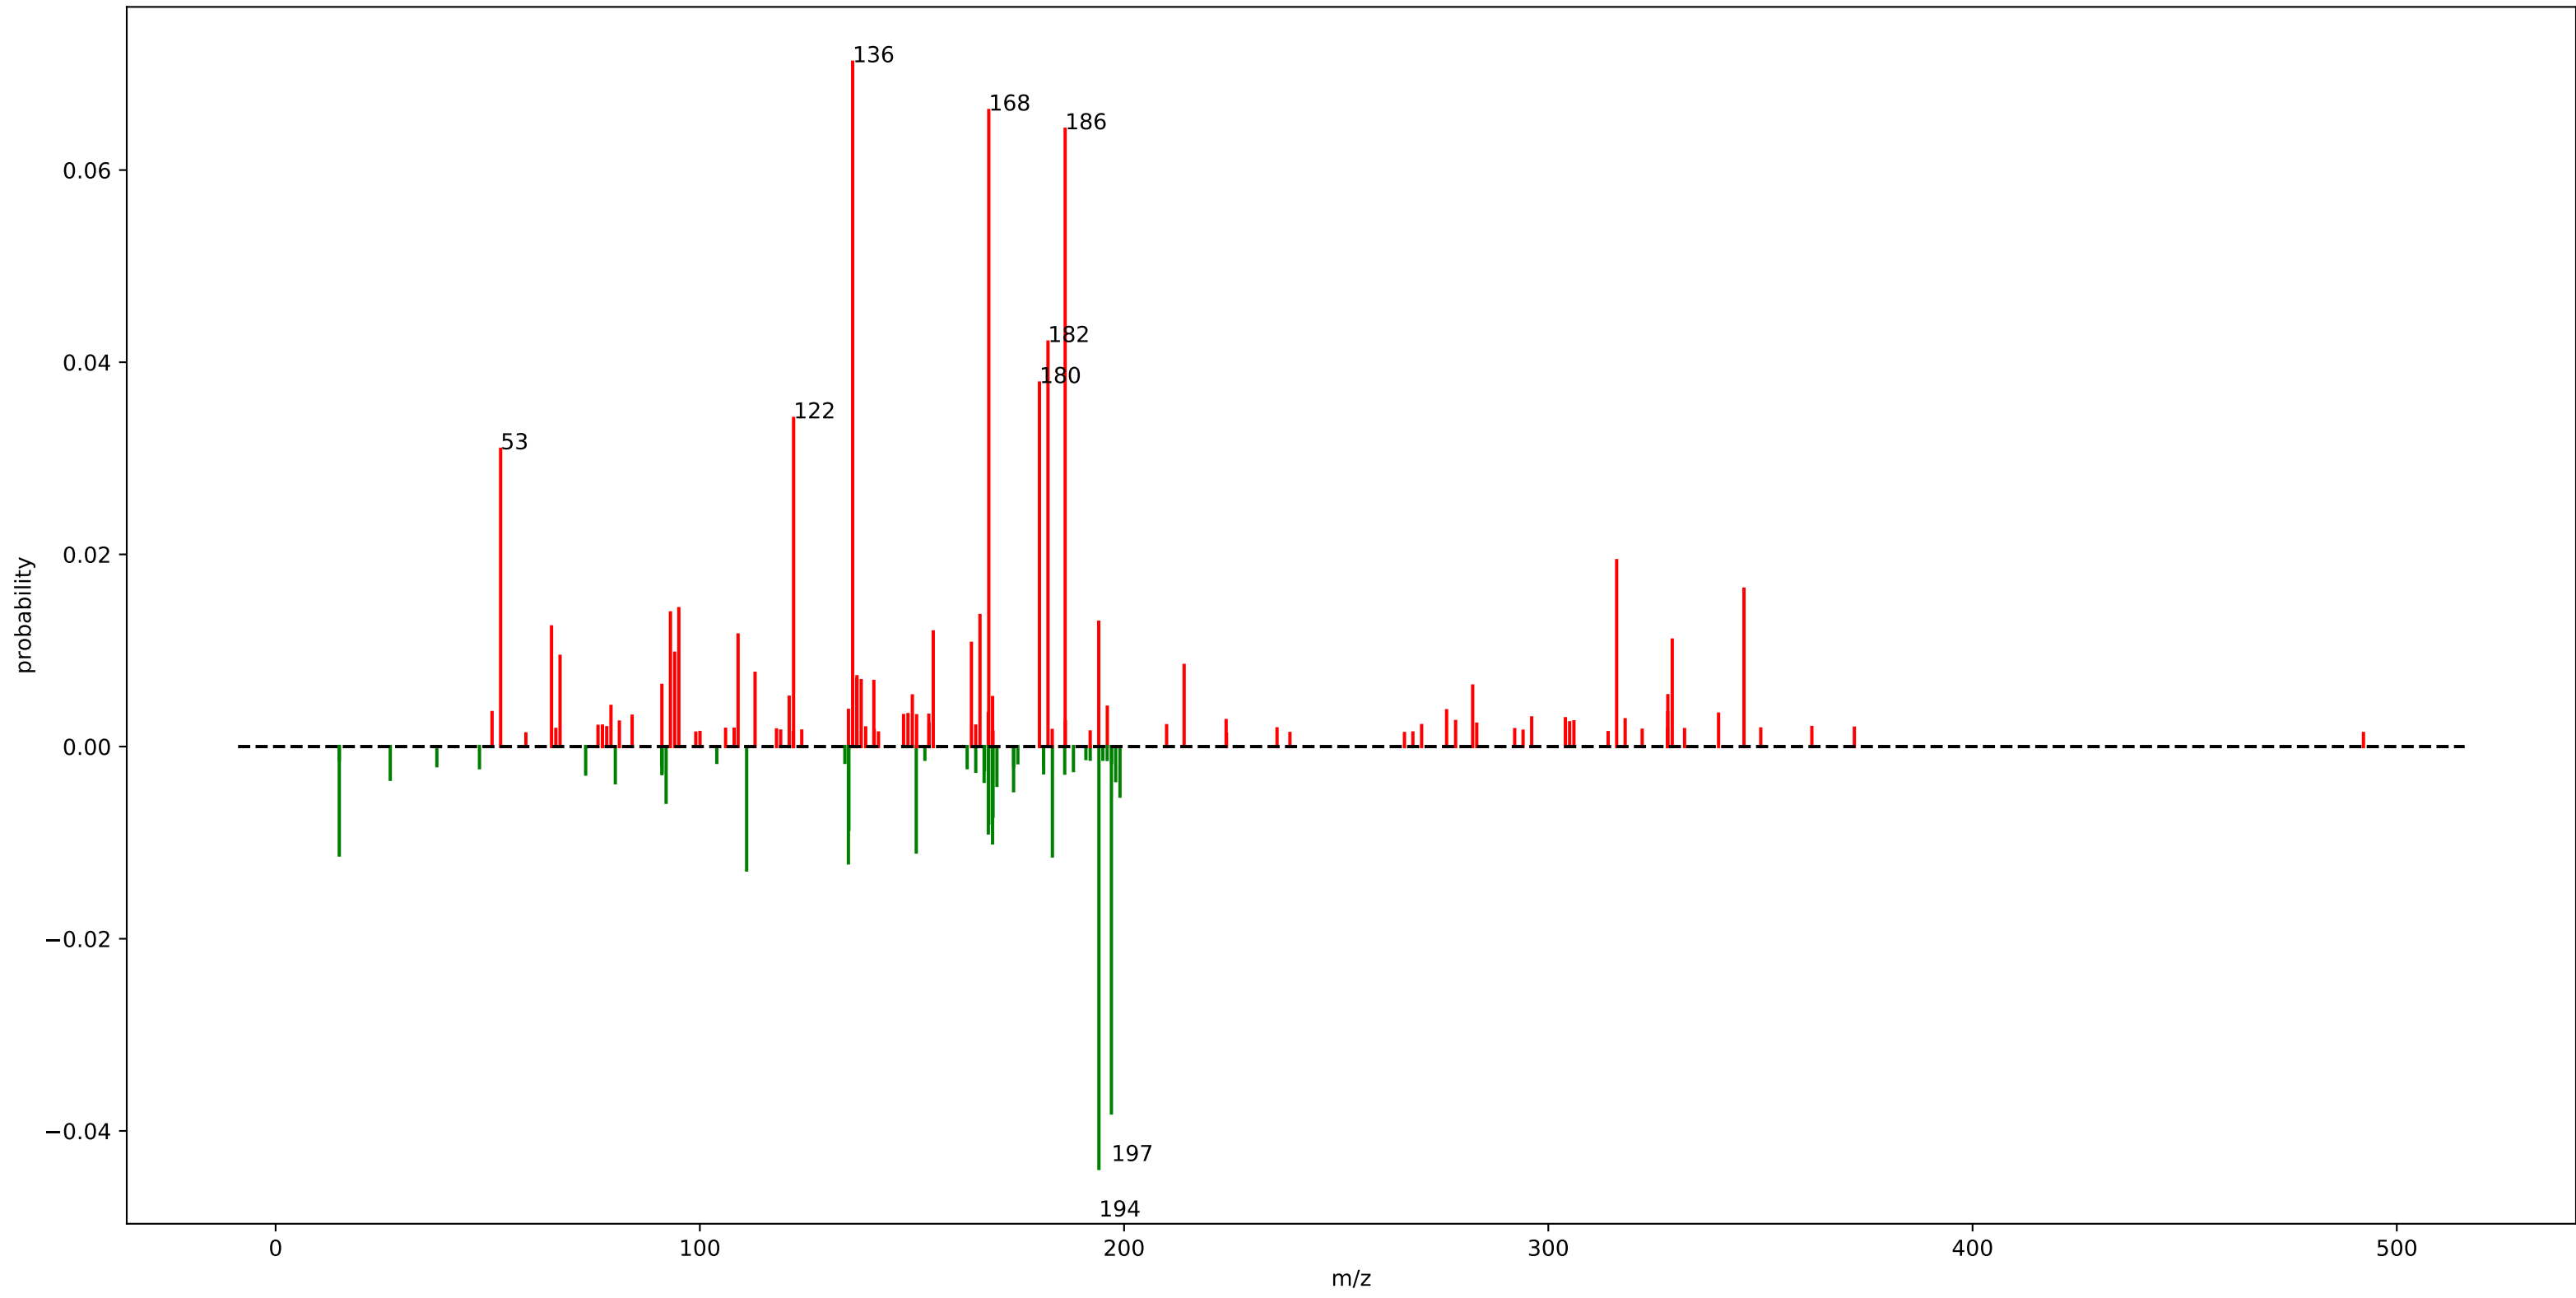

## urine\_mass2motif\_236.m2m

|                   |        |                   |        |                   |        |
|-------------------|--------|-------------------|--------|-------------------|--------|
| fragment_136.0225 | : 0.07 | loss_183.1075     | : 0.01 | loss_92.0475      | : 0.01 |
| fragment_168.1025 | : 0.07 | loss_15.0075      | : 0.01 | fragment_328.1775 | : 0.01 |
| fragment_186.1125 | : 0.06 | fragment_329.2075 | : 0.01 | fragment_150.0925 | : 0.01 |
| loss_194.0675     | : 0.04 | loss_151.0125     | : 0.01 | loss_199.0325     | : 0.01 |
| fragment_182.0625 | : 0.04 | fragment_164.0175 | : 0.01 | fragment_121.0625 | : 0.01 |
| loss_197.0125     | : 0.04 | loss_169.0025     | : 0.01 | fragment_169.0025 | : 0.01 |
| fragment_180.0475 | : 0.04 | fragment_94.0675  | : 0.01 |                   |        |
| fragment_122.0975 | : 0.03 | fragment_67.0525  | : 0.01 |                   |        |
| fragment_53.0375  | : 0.03 | loss_167.9975     | : 0.01 |                   |        |
| fragment_316.1125 | : 0.02 | loss_135.1275     | : 0.01 |                   |        |
| fragment_346.1225 | : 0.02 | fragment_214.1525 | : 0.01 |                   |        |
| fragment_95.0475  | : 0.01 | loss_168.1075     | : 0.01 |                   |        |
| fragment_93.0675  | : 0.01 | fragment_113.0175 | : 0.01 |                   |        |
| fragment_166.0325 | : 0.01 | fragment_137.0275 | : 0.01 |                   |        |
| fragment_194.0275 | : 0.01 | loss_169.1075     | : 0.01 |                   |        |
| loss_111.0325     | : 0.01 | fragment_137.0075 | : 0.01 |                   |        |
| fragment_65.0375  | : 0.01 | fragment_138.0375 | : 0.01 |                   |        |
| loss_135.0175     | : 0.01 | fragment_141.0125 | : 0.01 |                   |        |
| fragment_155.0175 | : 0.01 | fragment_91.0525  | : 0.01 |                   |        |
| fragment_109.0125 | : 0.01 | fragment_282.1675 | : 0.01 |                   |        |

motif\_526

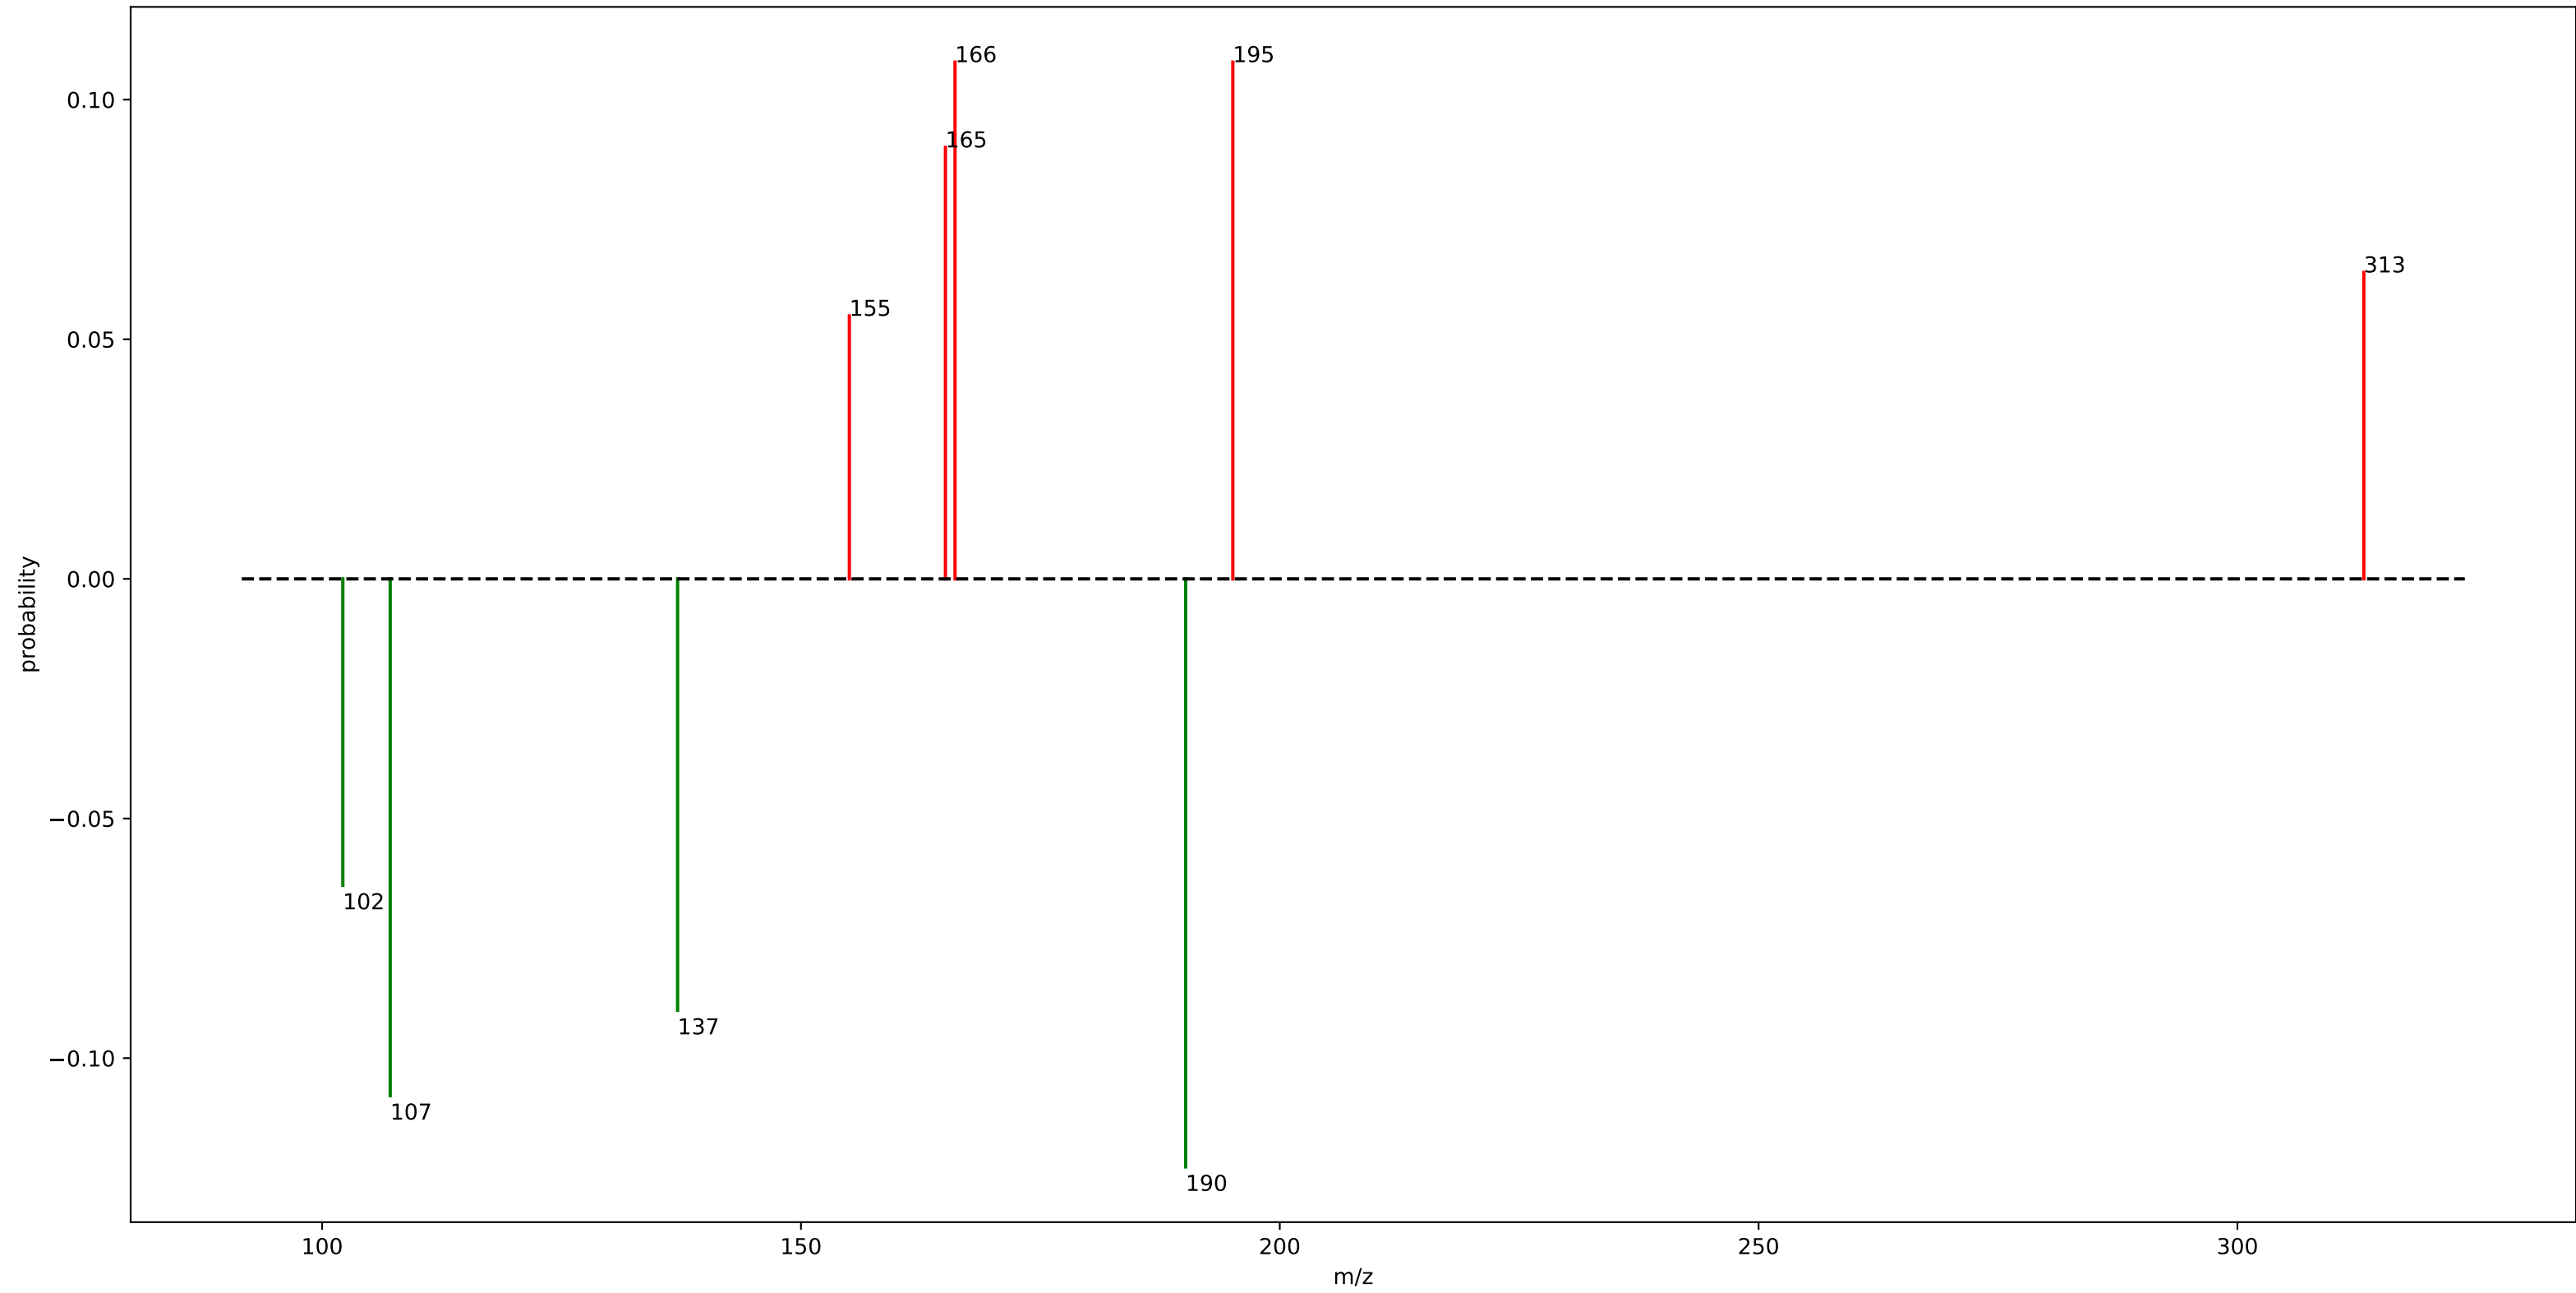

## motif\_526

|                   |        |
|-------------------|--------|
| loss_190.1725     | : 0.12 |
| loss_107.1075     | : 0.11 |
| fragment_195.0975 | : 0.11 |
| fragment_166.0875 | : 0.11 |
| fragment_165.0875 | : 0.09 |
| loss_137.1175     | : 0.09 |
| loss_102.1625     | : 0.06 |
| fragment_313.1975 | : 0.06 |
| fragment_155.0525 | : 0.05 |

StrepSalini\_motif\_74.m2m

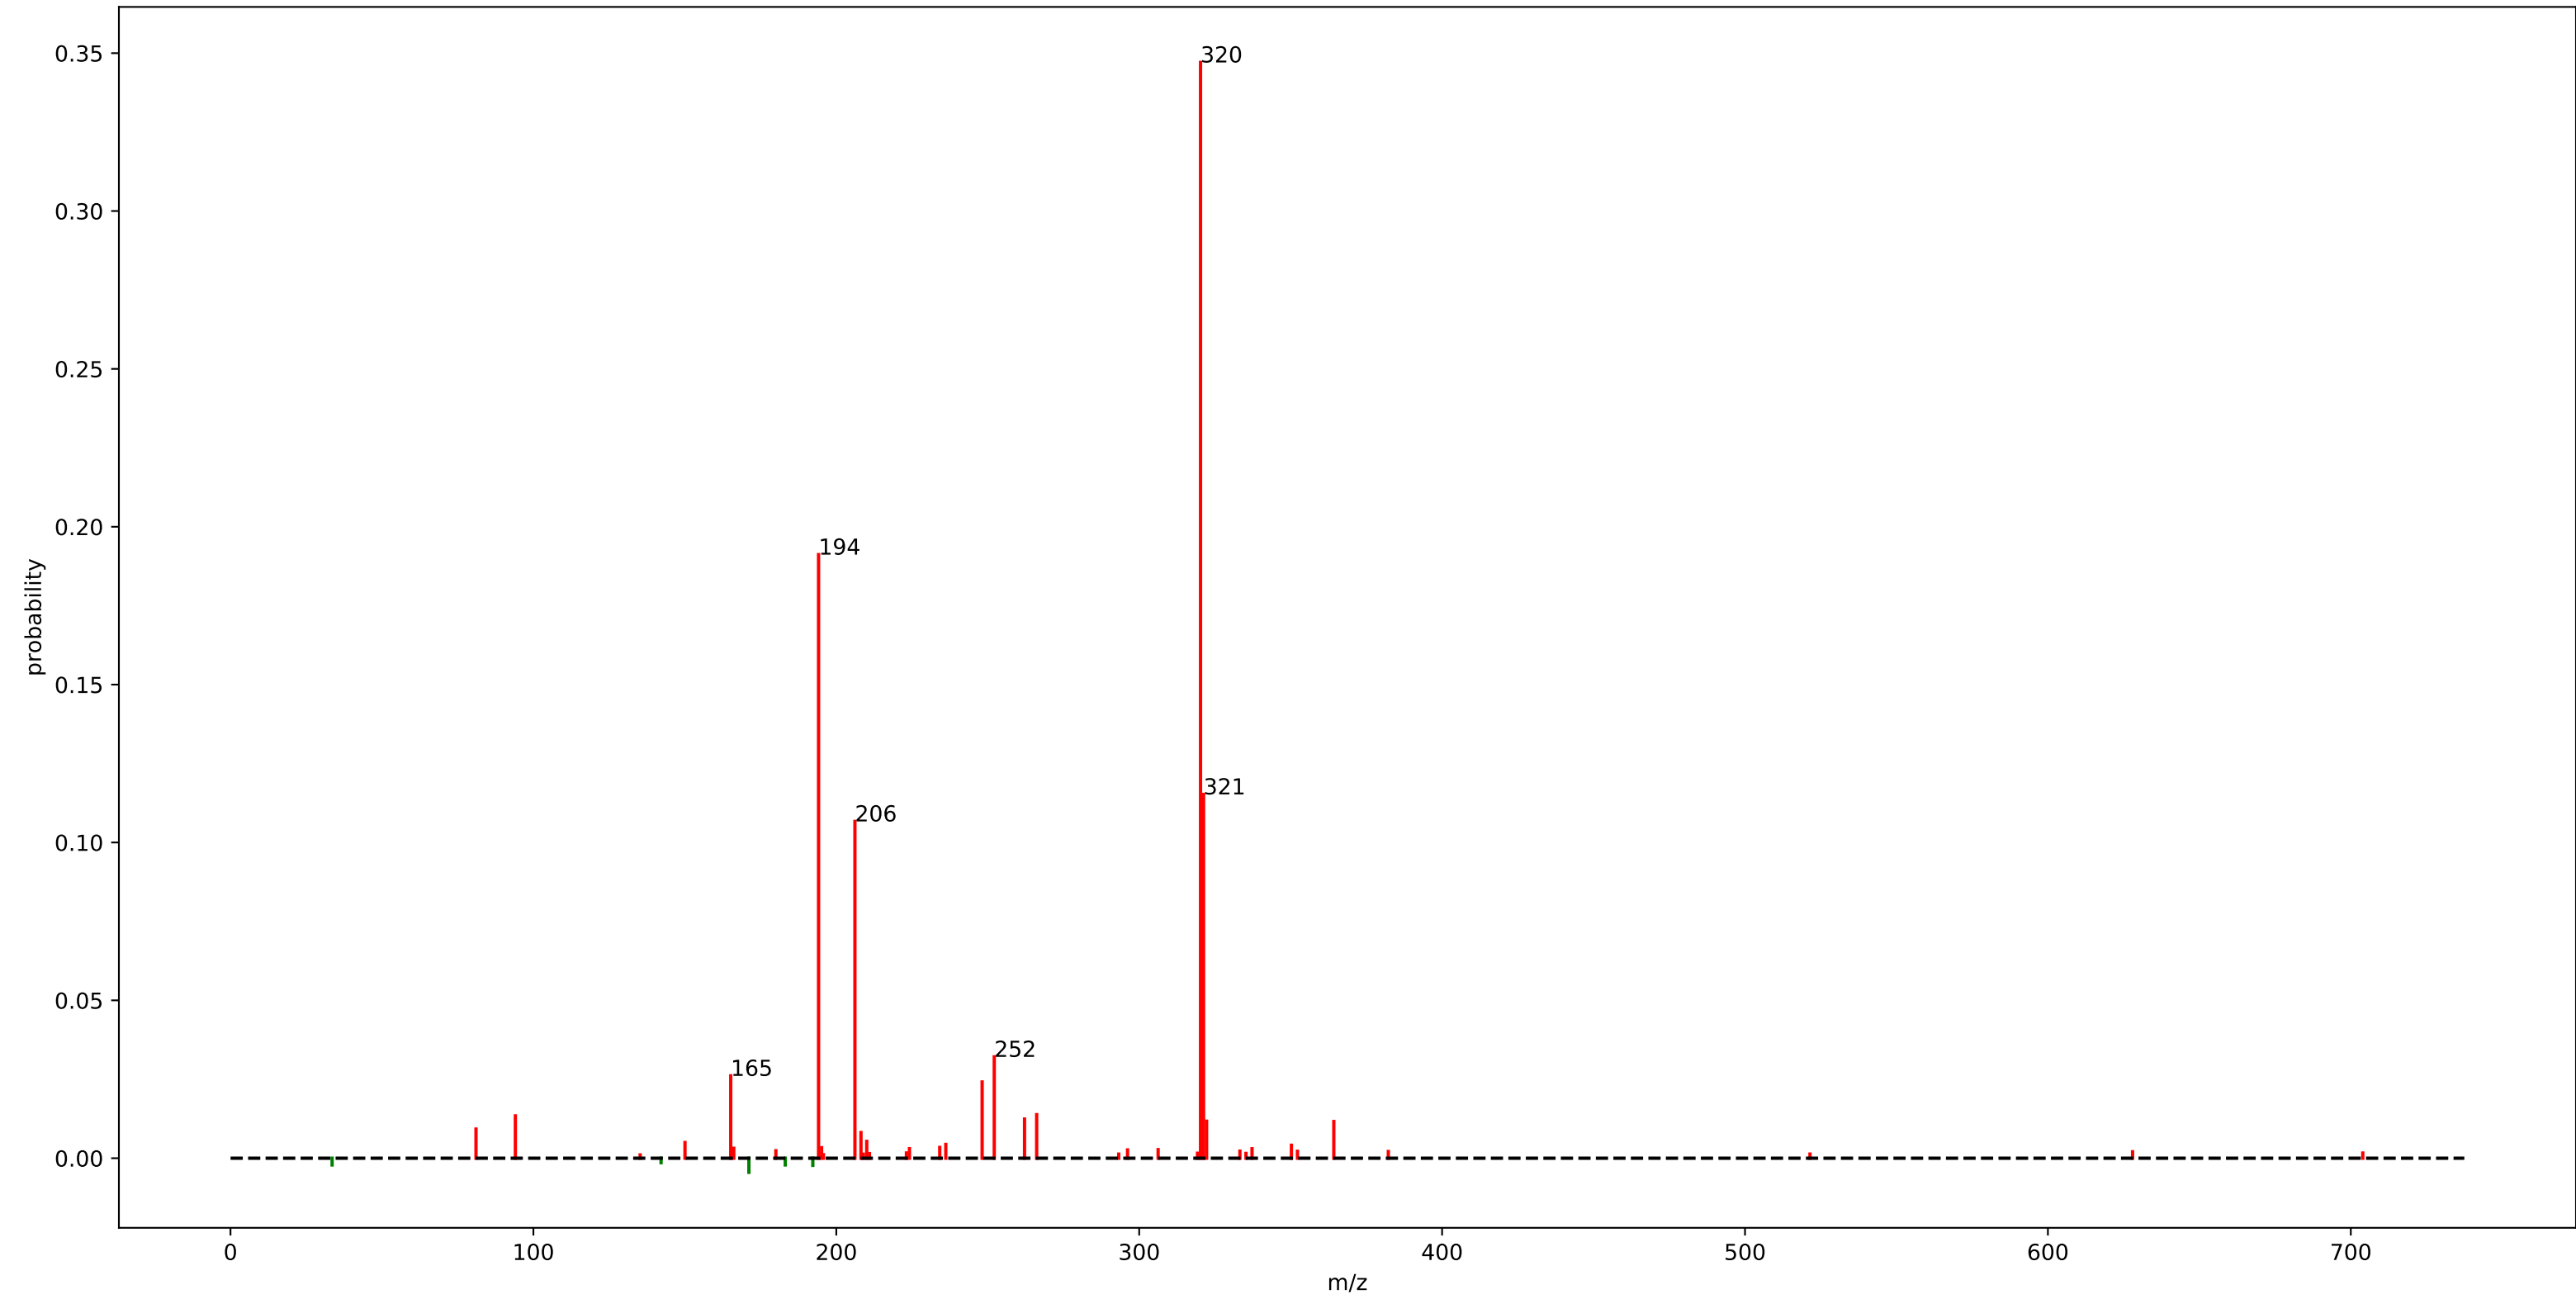

## StrepSalini\_motif\_74.m2m

|                   |        |
|-------------------|--------|
| fragment_320.2500 | : 0.35 |
| fragment_194.1500 | : 0.19 |
| fragment_321.2500 | : 0.12 |
| fragment_206.1500 | : 0.11 |
| fragment_252.1500 | : 0.03 |
| fragment_165.1500 | : 0.03 |
| fragment_248.1500 | : 0.02 |
| fragment_266.1500 | : 0.01 |
| fragment_94.0500  | : 0.01 |
| fragment_262.1500 | : 0.01 |
| fragment_322.2500 | : 0.01 |
| fragment_364.2500 | : 0.01 |
| fragment_81.0500  | : 0.01 |
| fragment_208.1500 | : 0.01 |
| fragment_210.0500 | : 0.01 |

motif\_527

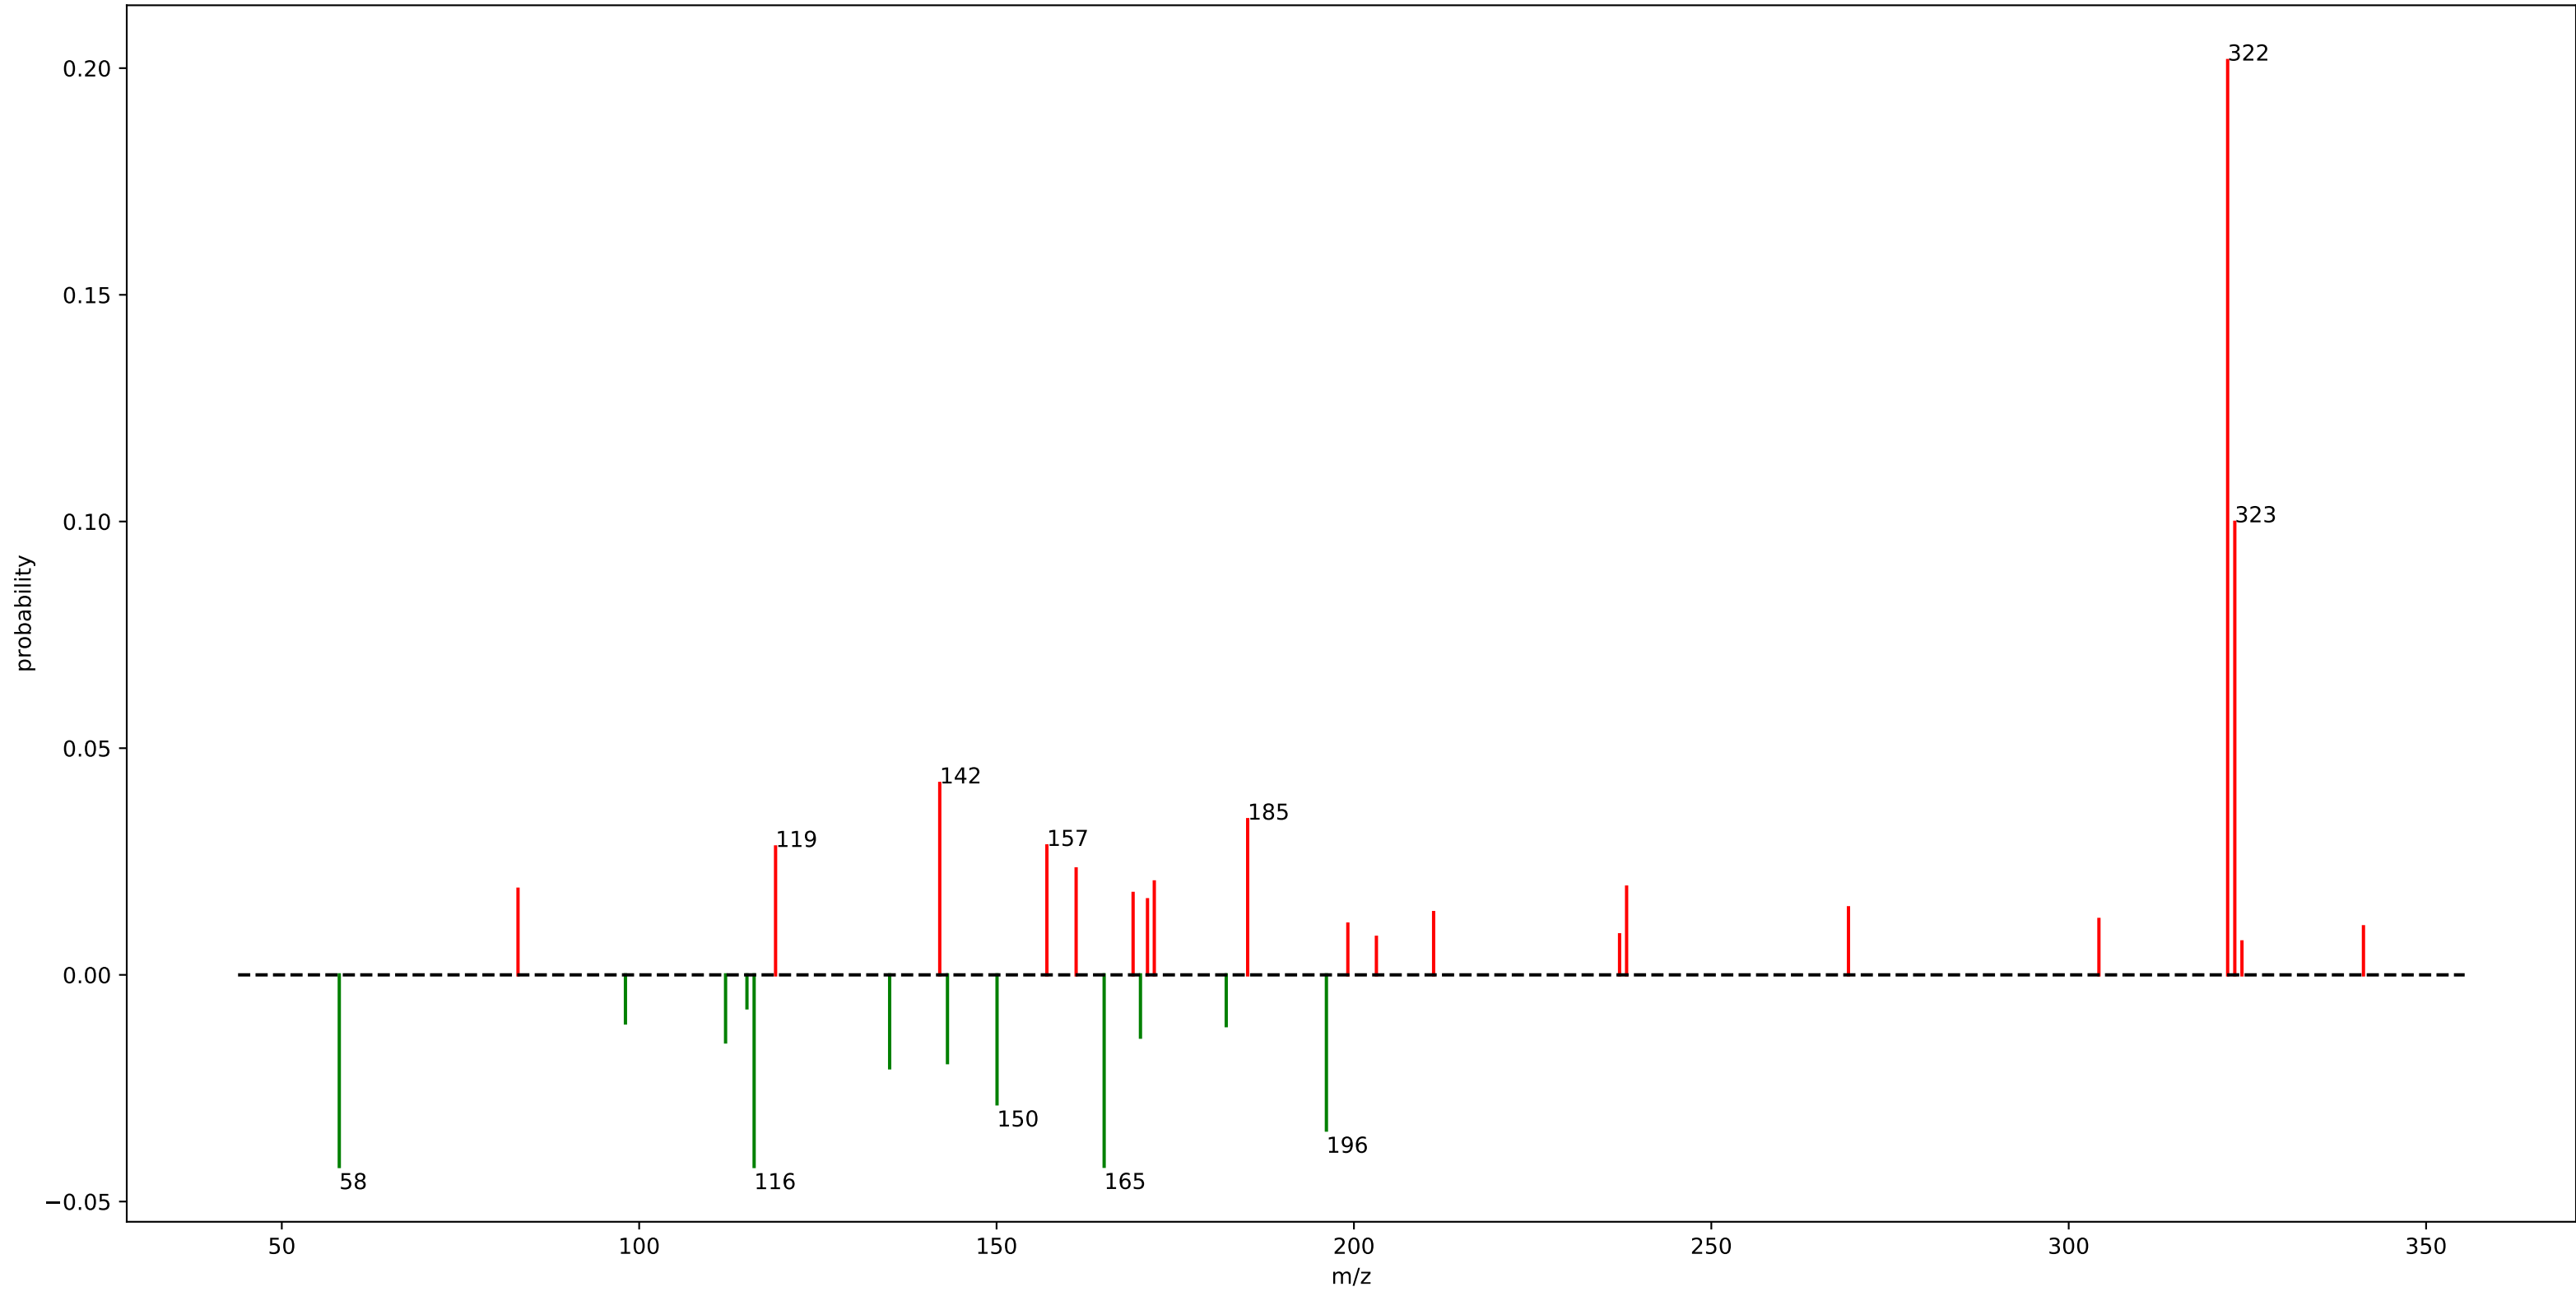

## motif\_527

|                   |        |                   |        |
|-------------------|--------|-------------------|--------|
| fragment_322.2375 | : 0.20 | fragment_269.1875 | : 0.01 |
| fragment_323.2375 | : 0.10 | loss_170.1325     | : 0.01 |
| loss_58.0425      | : 0.04 | fragment_211.1475 | : 0.01 |
| loss_116.0825     | : 0.04 | fragment_304.2275 | : 0.01 |
| fragment_142.0525 | : 0.04 | fragment_199.1475 | : 0.01 |
| loss_165.0525     | : 0.04 | loss_182.1325     | : 0.01 |
| loss_196.1475     | : 0.03 | loss_98.0775      | : 0.01 |
| fragment_185.1325 | : 0.03 | fragment_341.2375 | : 0.01 |
| loss_150.0675     | : 0.03 | fragment_237.1625 | : 0.01 |
| fragment_157.0425 | : 0.03 | fragment_203.1425 | : 0.01 |
| fragment_119.0825 | : 0.03 | fragment_324.2375 | : 0.01 |
| fragment_161.1325 | : 0.02 | loss_115.0775     | : 0.01 |
| loss_135.0425     | : 0.02 |                   |        |
| fragment_172.0675 | : 0.02 |                   |        |
| fragment_238.1475 | : 0.02 |                   |        |
| loss_143.1325     | : 0.02 |                   |        |
| fragment_83.0475  | : 0.02 |                   |        |
| fragment_169.1025 | : 0.02 |                   |        |
| fragment_171.1175 | : 0.02 |                   |        |
| loss_112.0875     | : 0.01 |                   |        |



urine\_mass2motif\_68.m2m

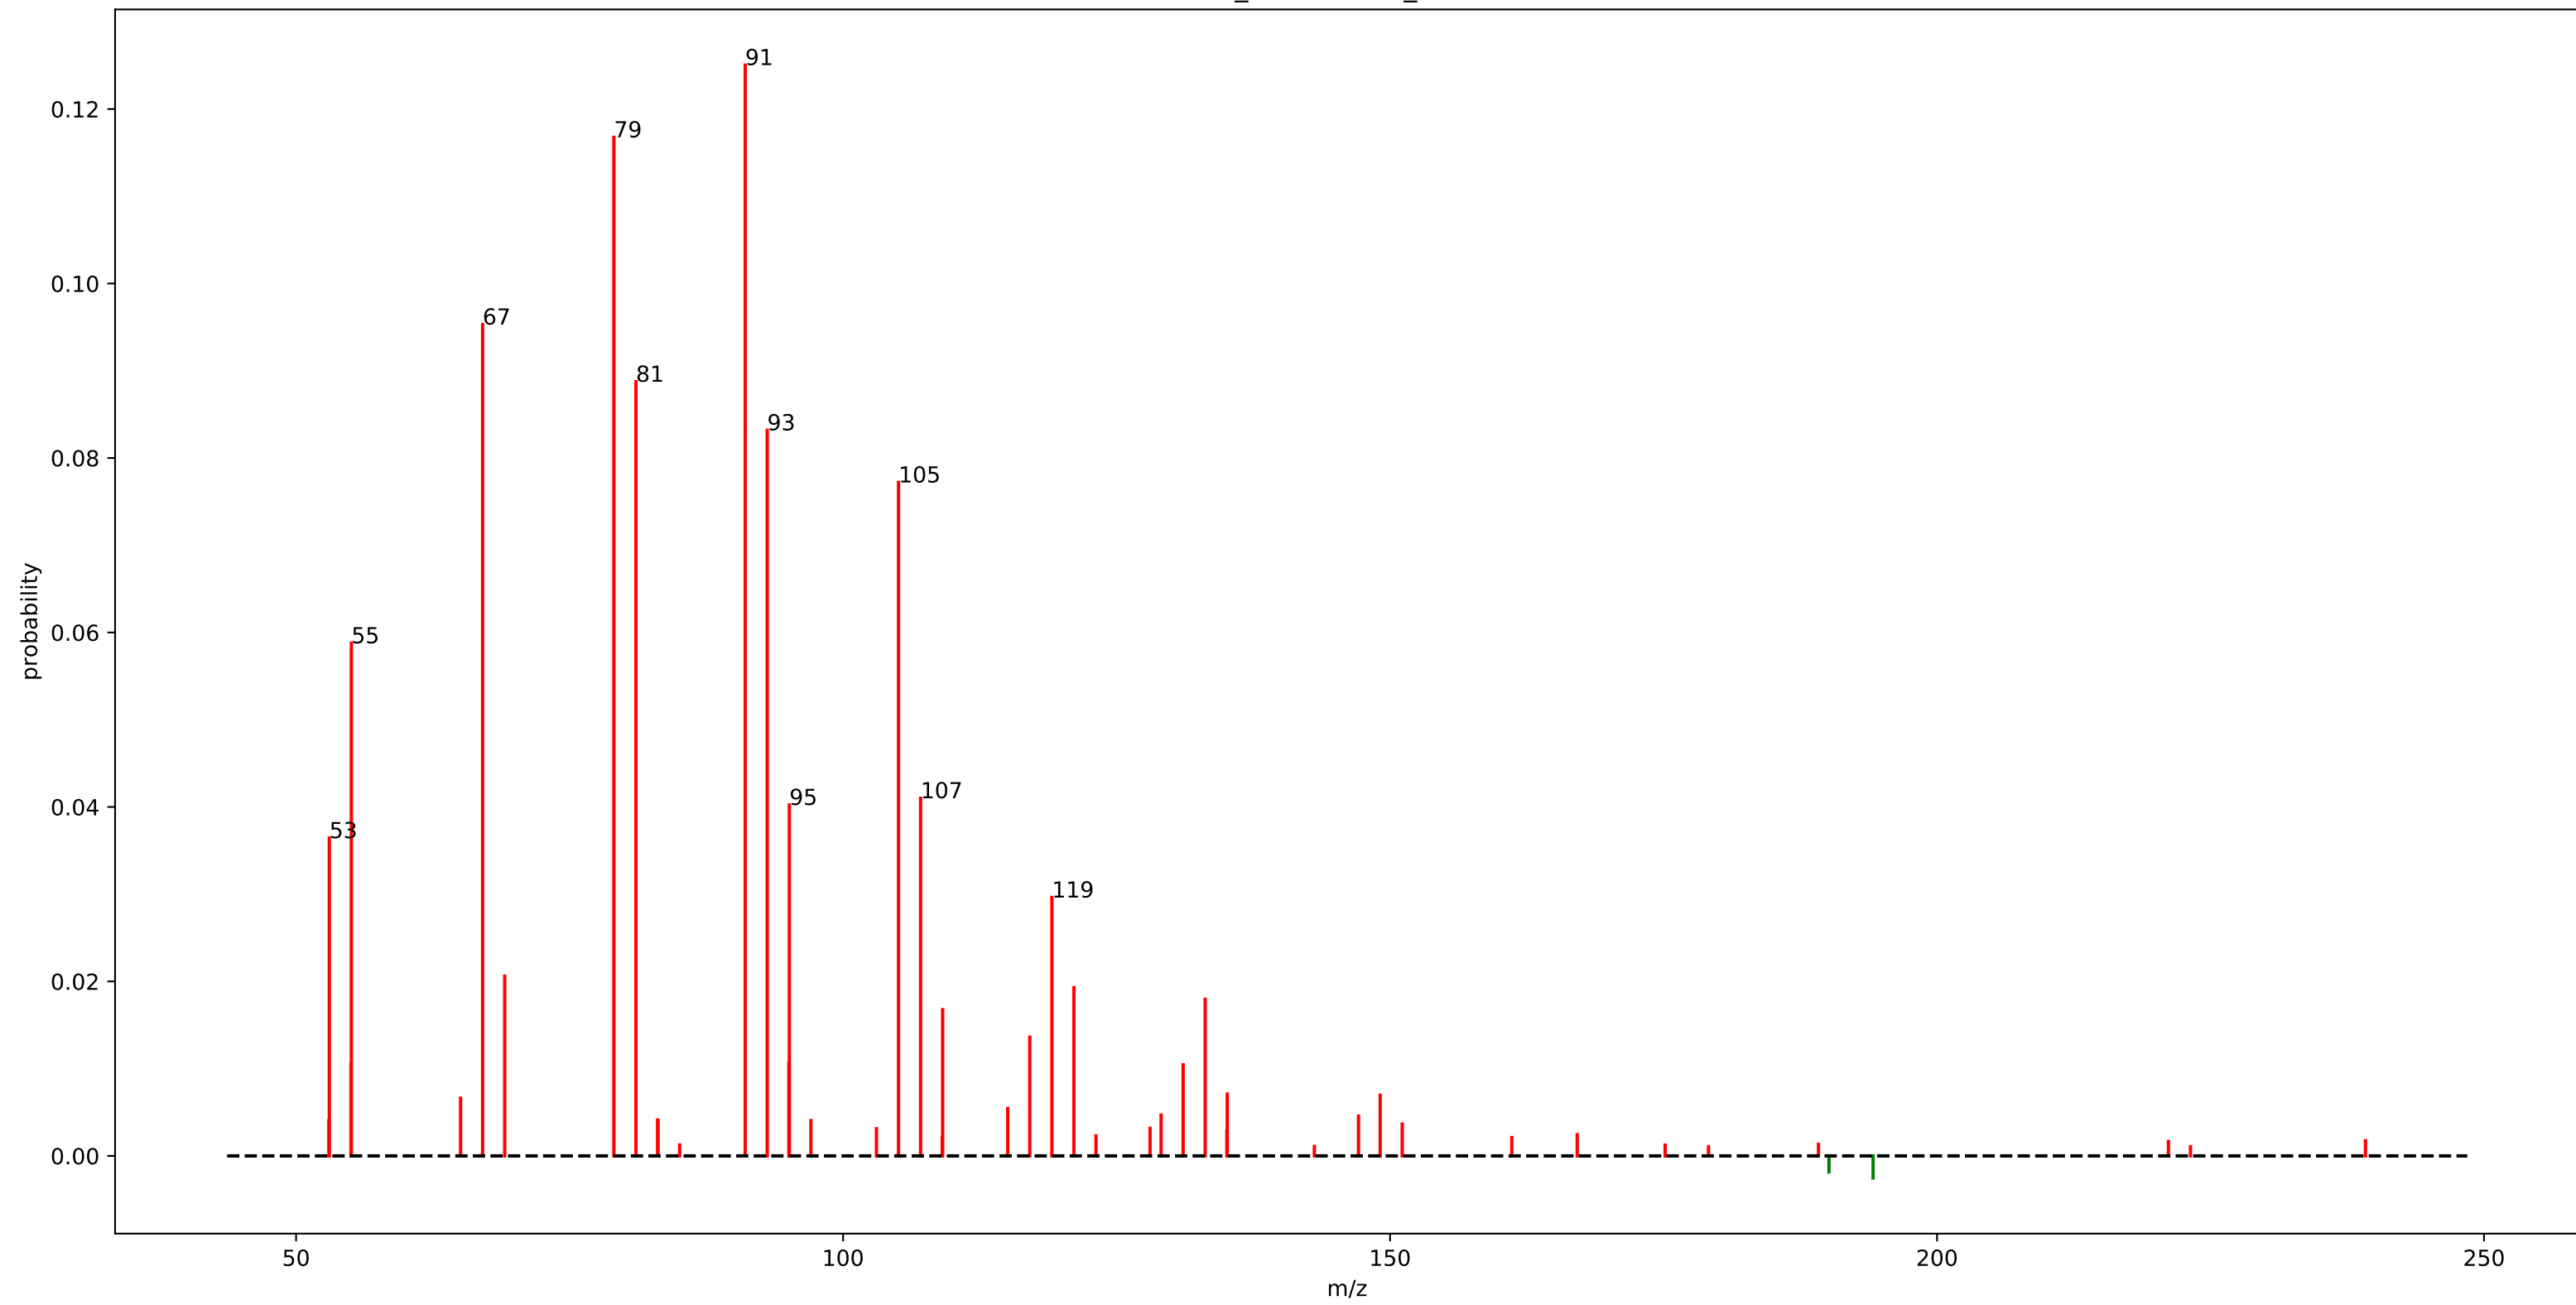

## urine\_mass2motif\_68.m2m

|                   |        |                   |        |
|-------------------|--------|-------------------|--------|
| fragment_91.0525  | : 0.13 | fragment_149.0975 | : 0.01 |
| fragment_79.0525  | : 0.12 | fragment_65.0375  | : 0.01 |
| fragment_67.0525  | : 0.10 | fragment_115.0525 | : 0.01 |
| fragment_81.0675  | : 0.09 |                   |        |
| fragment_93.0675  | : 0.08 |                   |        |
| fragment_105.0675 | : 0.08 |                   |        |
| fragment_55.0525  | : 0.06 |                   |        |
| fragment_107.0875 | : 0.04 |                   |        |
| fragment_95.0875  | : 0.04 |                   |        |
| fragment_53.0375  | : 0.04 |                   |        |
| fragment_119.0875 | : 0.03 |                   |        |
| fragment_69.0725  | : 0.02 |                   |        |
| fragment_121.1025 | : 0.02 |                   |        |
| fragment_133.1025 | : 0.02 |                   |        |
| fragment_109.1025 | : 0.02 |                   |        |
| fragment_117.0675 | : 0.01 |                   |        |
| fragment_95.0475  | : 0.01 |                   |        |
| fragment_55.0175  | : 0.01 |                   |        |
| fragment_131.0875 | : 0.01 |                   |        |
| fragment_135.1175 | : 0.01 |                   |        |

motif\_420

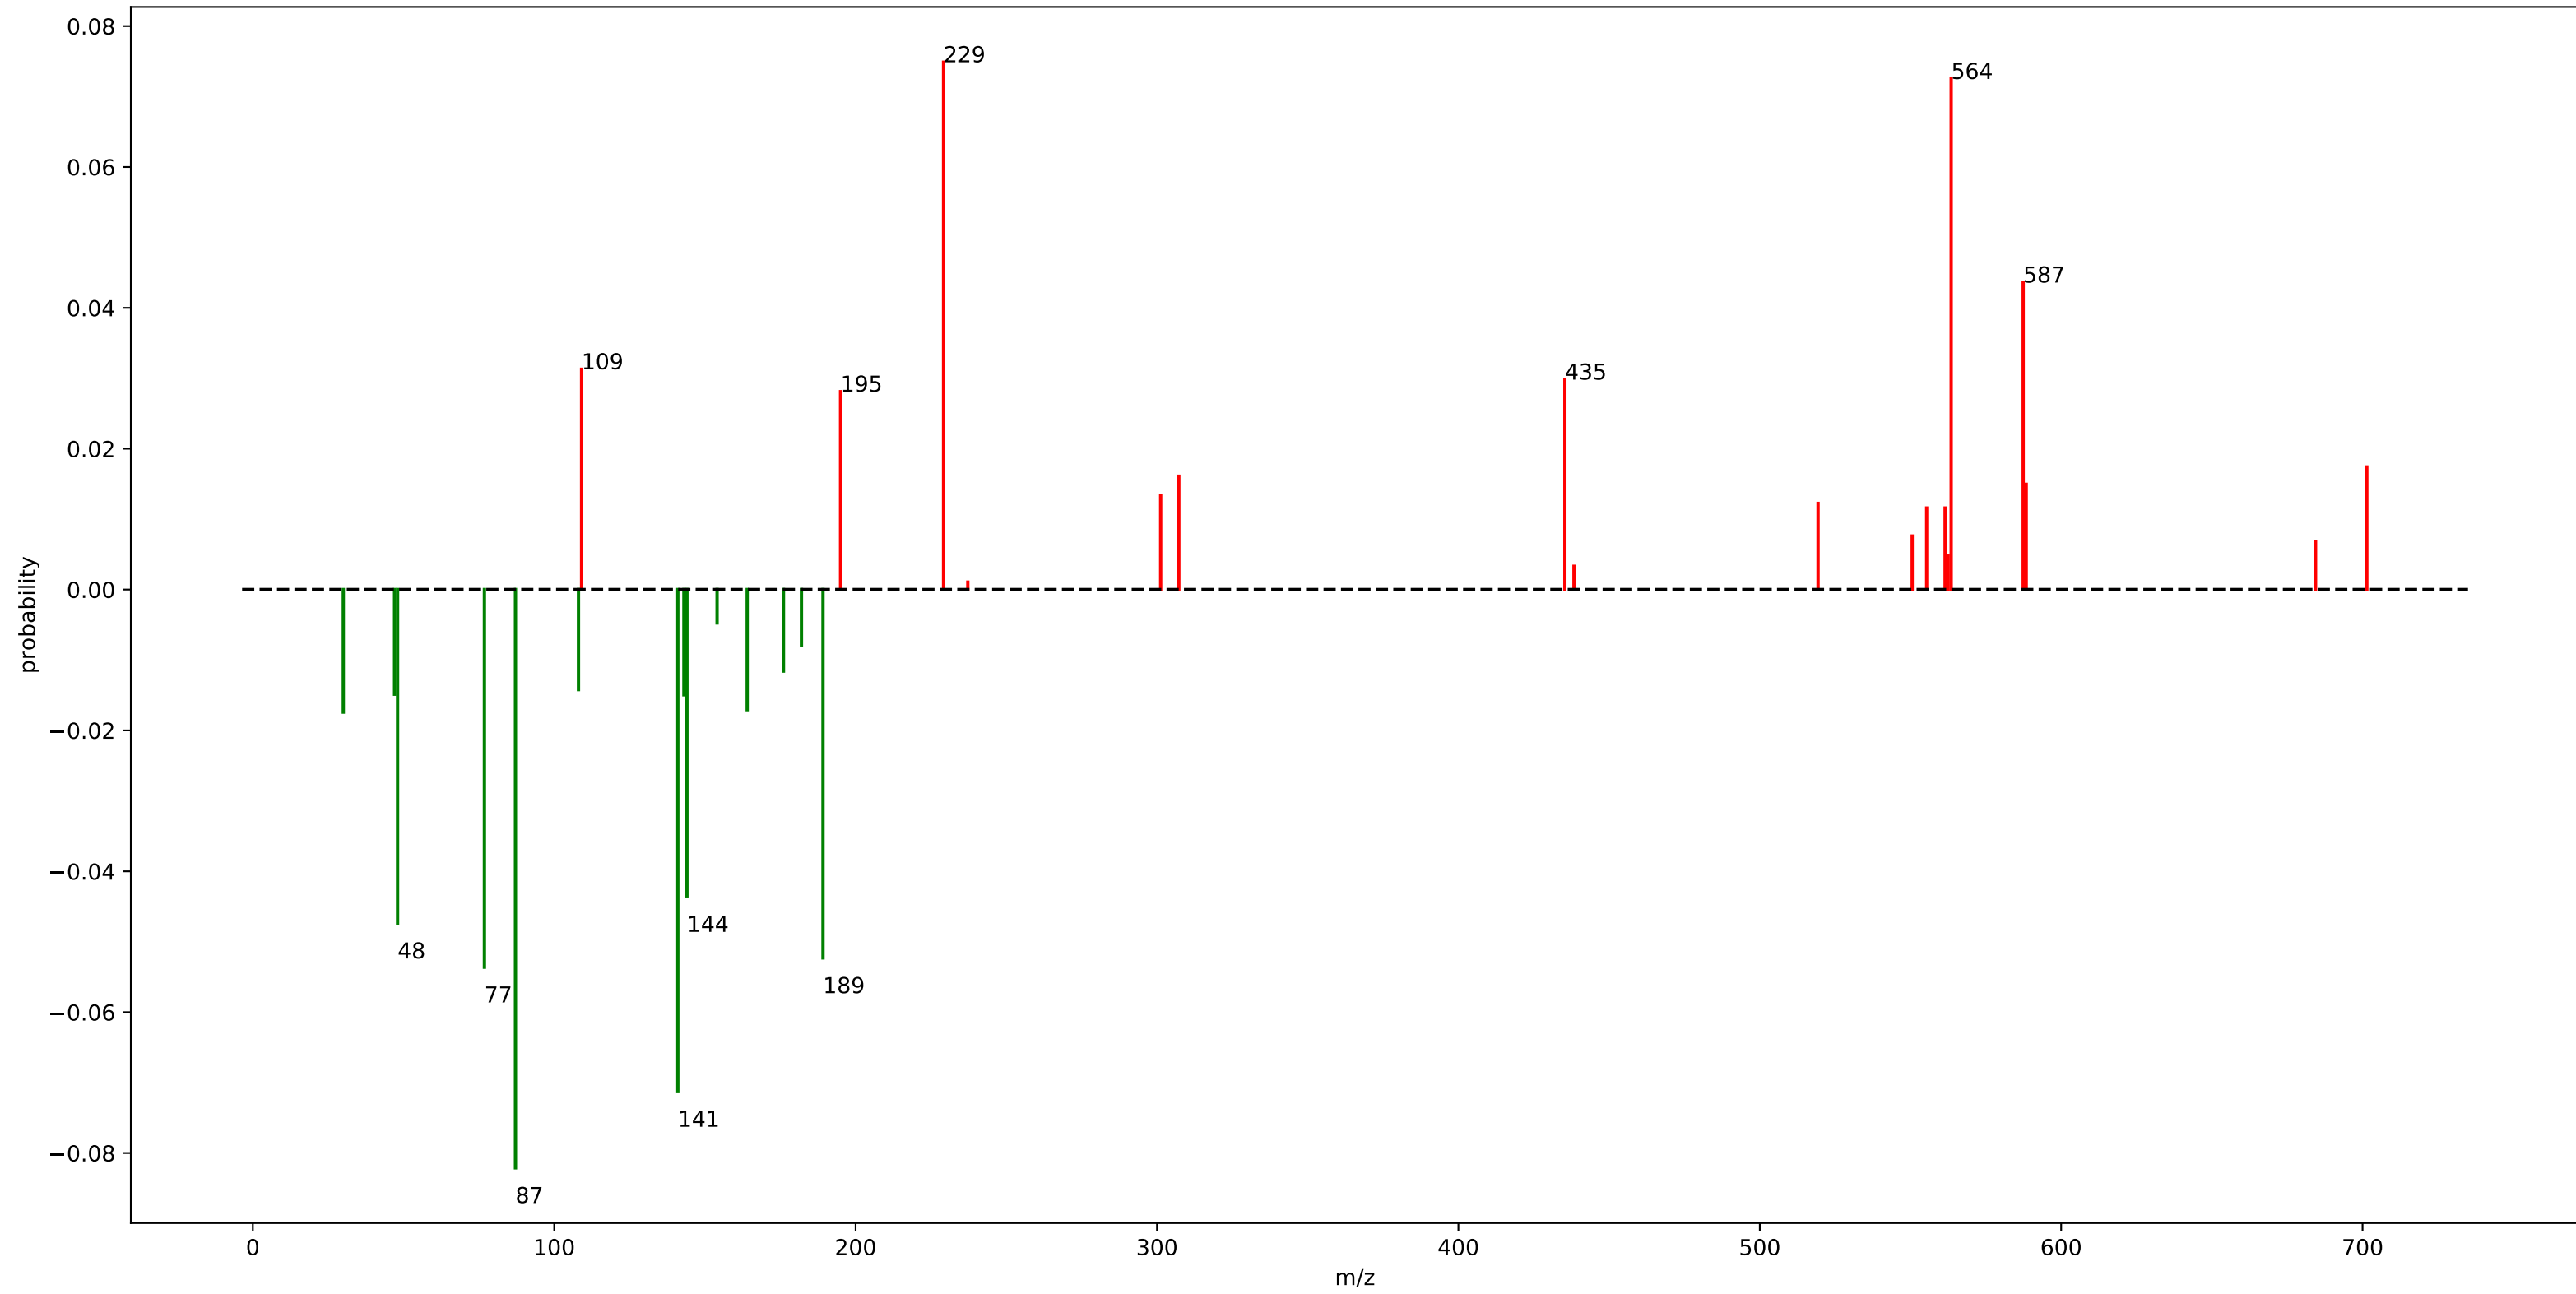

## motif\_420

|                   |        |                   |        |
|-------------------|--------|-------------------|--------|
| loss_87.1375      | : 0.08 | fragment_301.2125 | : 0.01 |
| fragment_229.1775 | : 0.07 | fragment_519.3325 | : 0.01 |
| fragment_563.5025 | : 0.07 | fragment_561.4875 | : 0.01 |
| loss_141.0125     | : 0.07 | loss_176.0575     | : 0.01 |
| loss_76.8325      | : 0.05 | fragment_555.3675 | : 0.01 |
| loss_189.1725     | : 0.05 | loss_182.0275     | : 0.01 |
| loss_48.0275      | : 0.05 | fragment_550.5575 | : 0.01 |
| fragment_587.3975 | : 0.04 | fragment_684.4025 | : 0.01 |
| loss_144.0325     | : 0.04 |                   |        |
| fragment_109.0725 | : 0.03 |                   |        |
| fragment_435.3275 | : 0.03 |                   |        |
| fragment_195.0025 | : 0.03 |                   |        |
| fragment_701.4125 | : 0.02 |                   |        |
| loss_30.0125      | : 0.02 |                   |        |
| loss_164.0225     | : 0.02 |                   |        |
| fragment_307.2425 | : 0.02 |                   |        |
| loss_143.0275     | : 0.01 |                   |        |
| fragment_588.3975 | : 0.01 |                   |        |
| loss_47.0225      | : 0.01 |                   |        |
| loss_108.0475     | : 0.01 |                   |        |

StrepSalini\_motif\_49.m2m

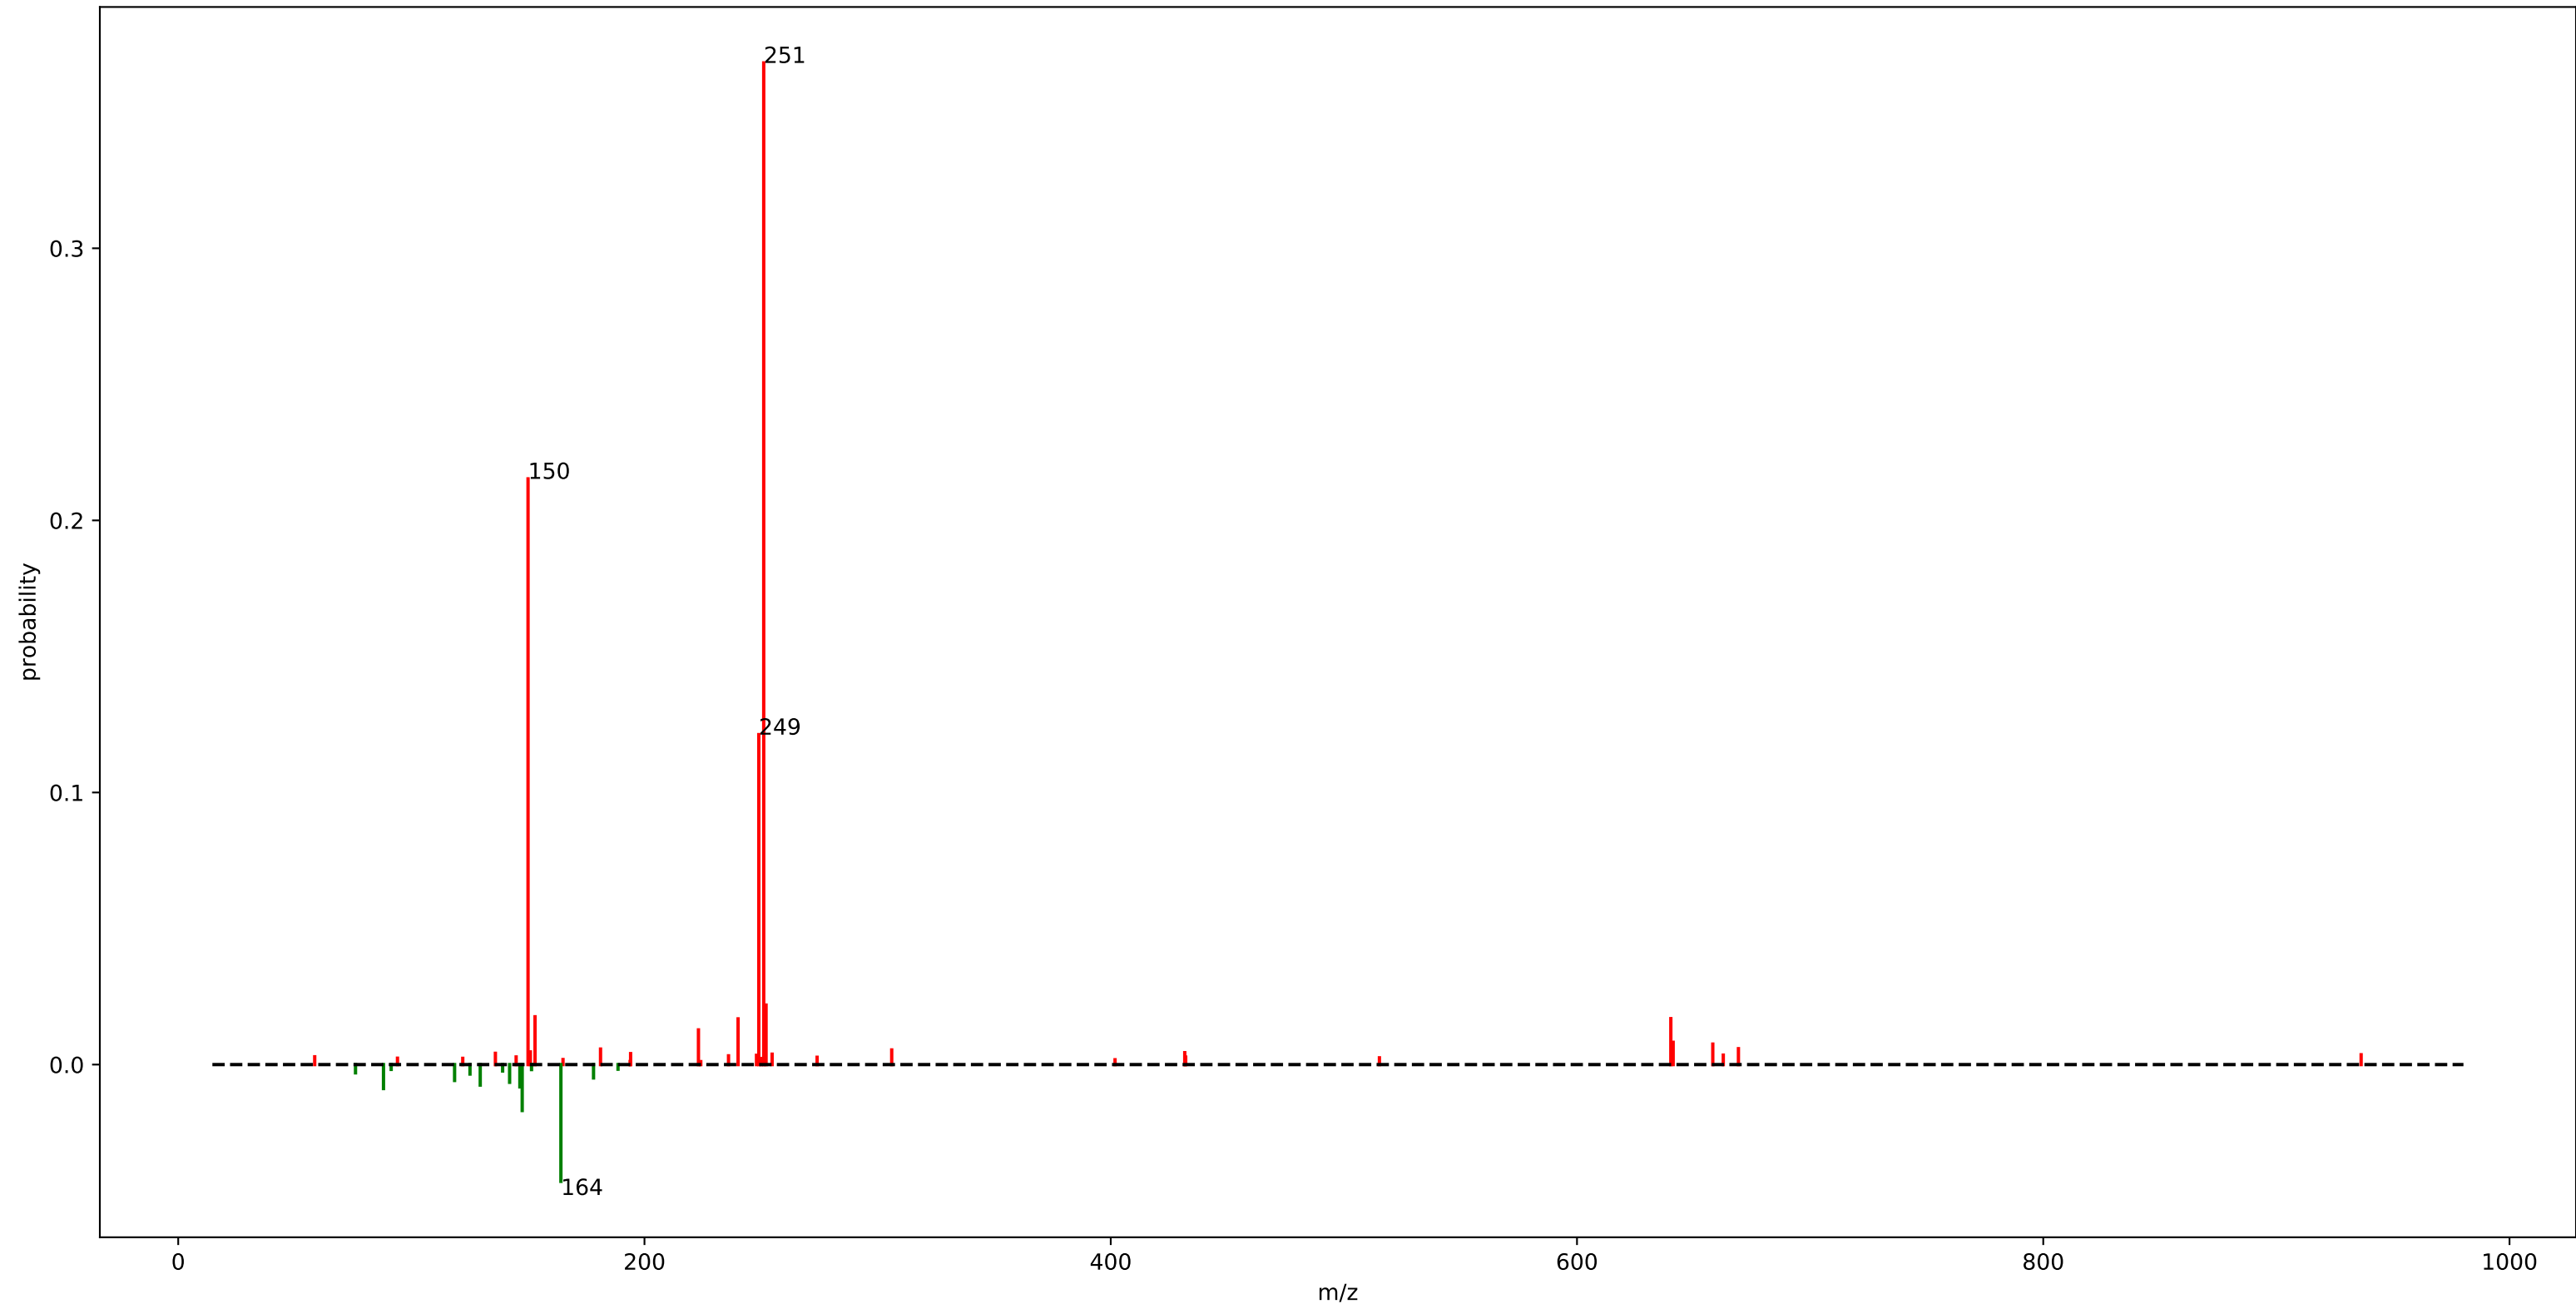

## StrepSalini\_motif\_49.m2m

|                   |        |
|-------------------|--------|
| fragment_251.1500 | : 0.37 |
| fragment_150.0500 | : 0.22 |
| fragment_249.0500 | : 0.12 |
| loss_164.1500     | : 0.04 |
| fragment_252.1500 | : 0.02 |
| fragment_153.0525 | : 0.02 |
| loss_147.5500     | : 0.02 |
| fragment_640.2500 | : 0.02 |
| fragment_240.1500 | : 0.02 |
| fragment_223.1525 | : 0.01 |
| loss_88.0525      | : 0.01 |
| loss_146.5500     | : 0.01 |
| fragment_641.2500 | : 0.01 |
| fragment_658.2500 | : 0.01 |
| loss_129.5500     | : 0.01 |
| loss_142.1500     | : 0.01 |
| loss_118.5500     | : 0.01 |
| fragment_669.2500 | : 0.01 |
| fragment_181.1500 | : 0.01 |
| fragment_306.0500 | : 0.01 |

rhabdus\_motif\_90.m2m

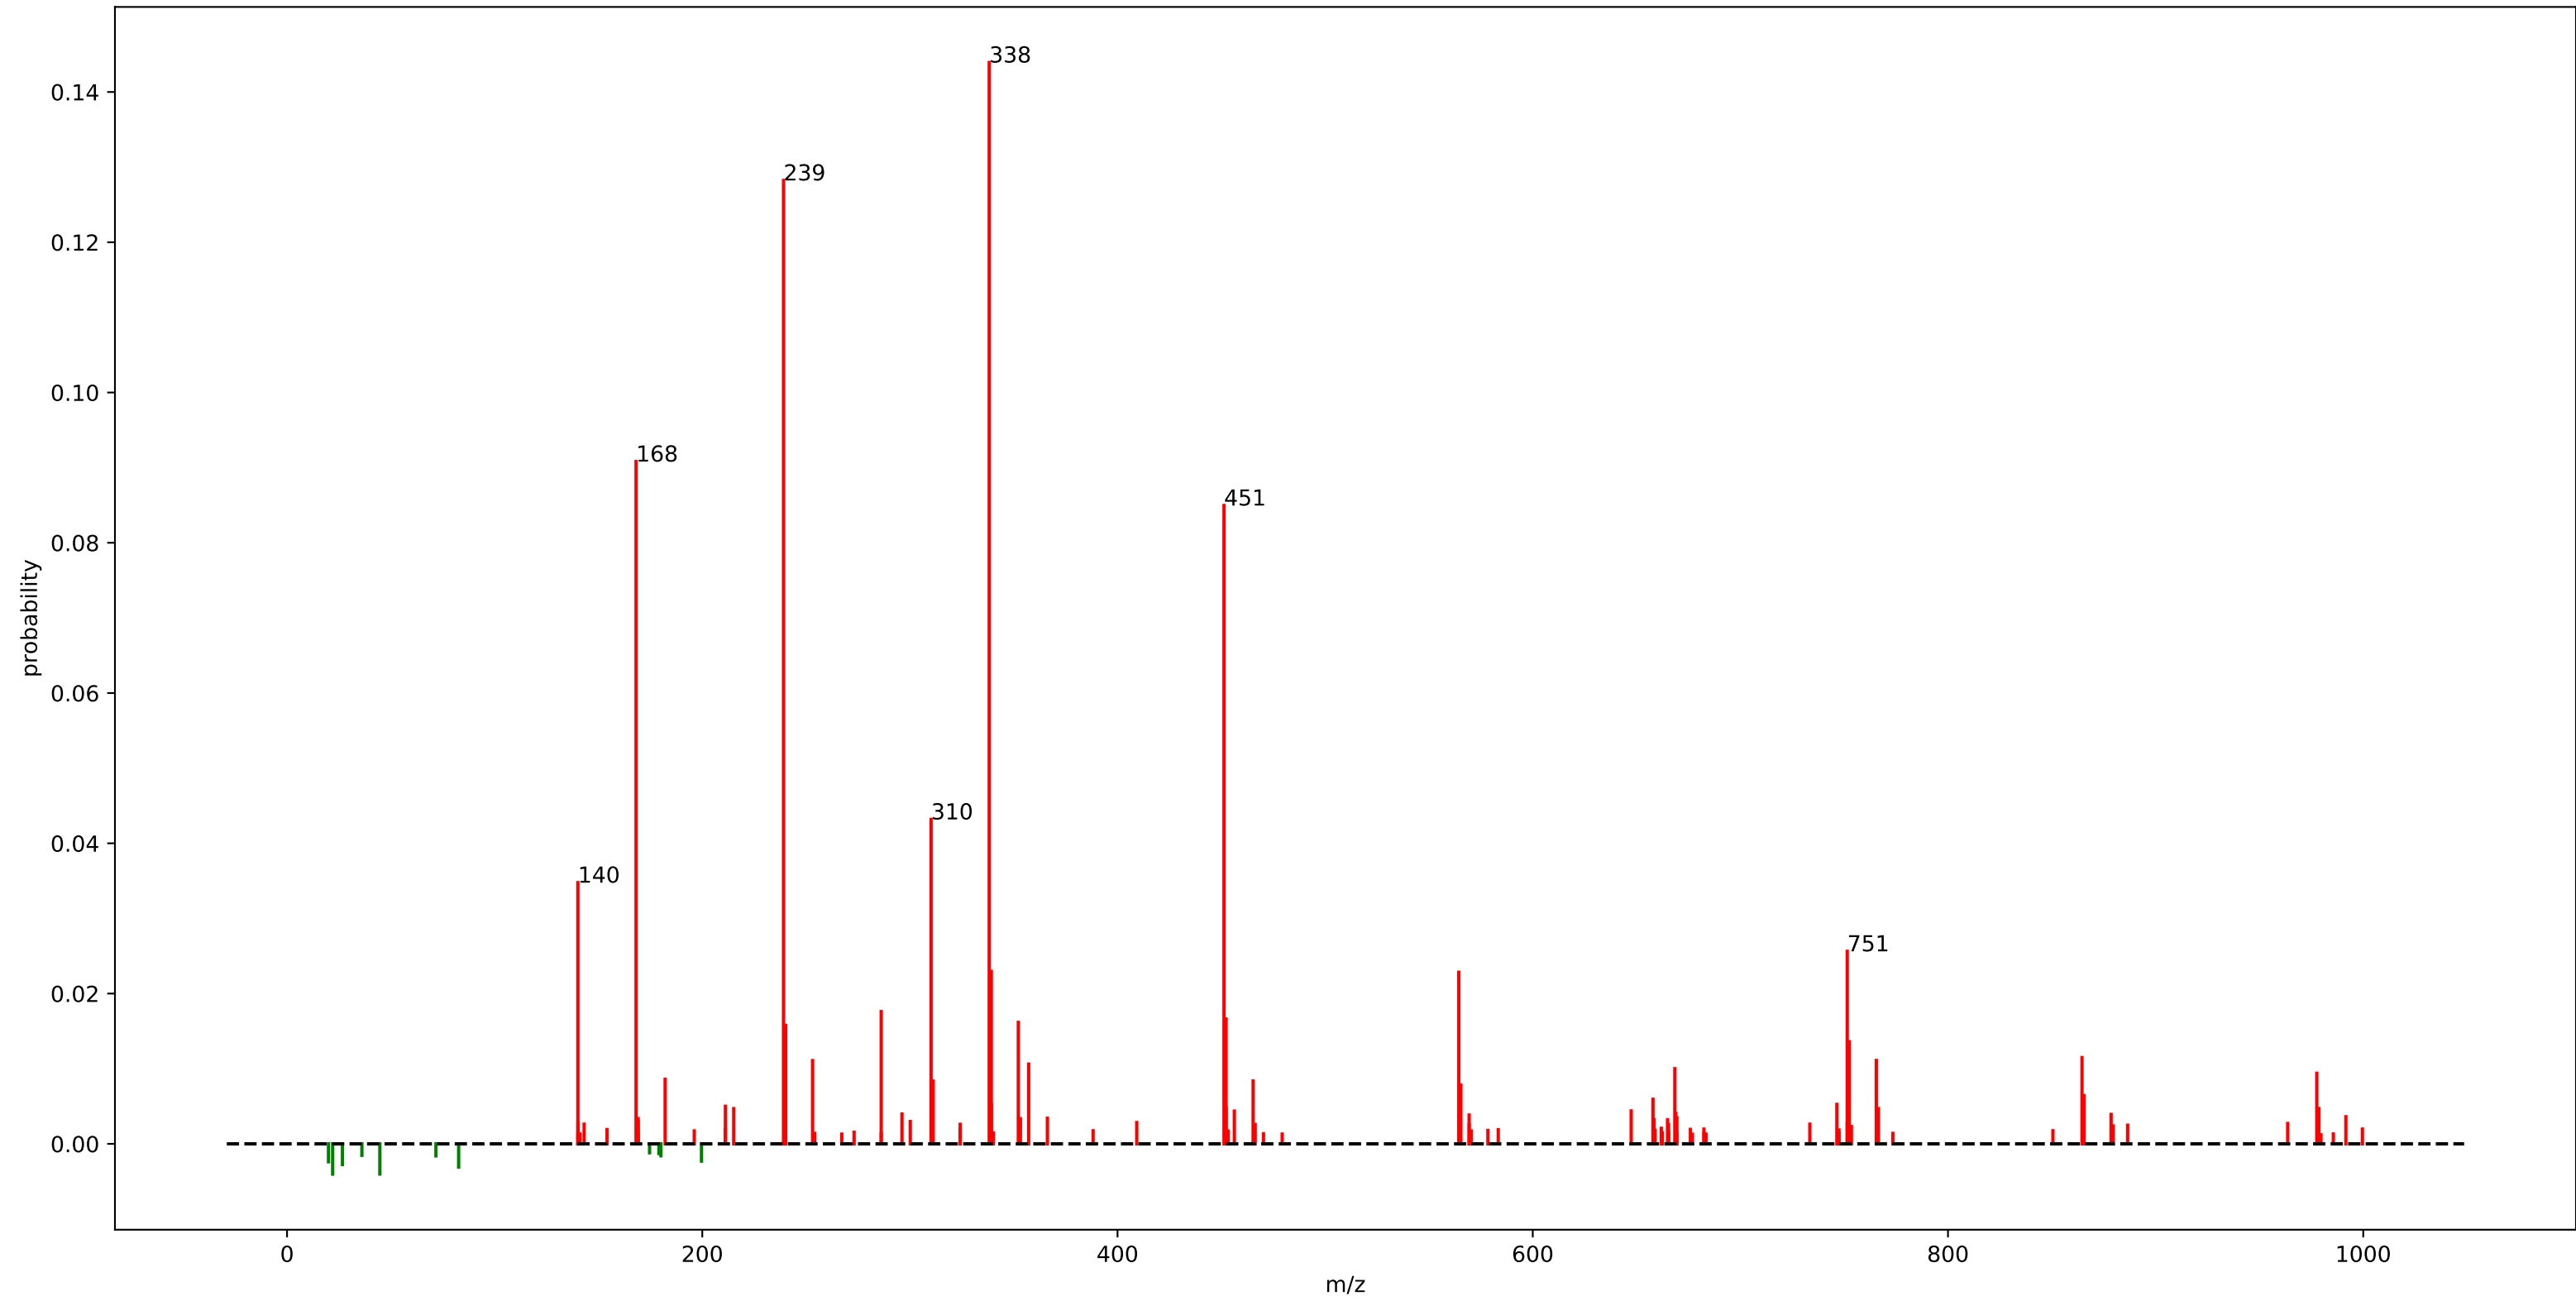

## rhabdus\_motif\_90.m2m

|                   |        |                   |        |
|-------------------|--------|-------------------|--------|
| fragment_338.2075 | : 0.14 | fragment_182.1175 | : 0.01 |
| fragment_239.1375 | : 0.13 | fragment_465.3075 | : 0.01 |
| fragment_168.1025 | : 0.09 | fragment_311.2125 | : 0.01 |
| fragment_451.2925 | : 0.08 | fragment_310.2075 | : 0.01 |
| fragment_310.2125 | : 0.04 | fragment_565.3775 | : 0.01 |
| fragment_140.1025 | : 0.03 | fragment_865.5575 | : 0.01 |
| fragment_751.4725 | : 0.03 | fragment_657.9225 | : 0.01 |
| fragment_339.2075 | : 0.02 | fragment_746.4825 | : 0.01 |
| fragment_564.3775 | : 0.02 | fragment_339.2125 | : 0.01 |
| fragment_286.1775 | : 0.02 |                   |        |
| fragment_452.2925 | : 0.02 |                   |        |
| fragment_352.2225 | : 0.02 |                   |        |
| fragment_240.1425 | : 0.02 |                   |        |
| fragment_752.4725 | : 0.01 |                   |        |
| fragment_864.5525 | : 0.01 |                   |        |
| fragment_765.4875 | : 0.01 |                   |        |
| fragment_253.1525 | : 0.01 |                   |        |
| fragment_357.2125 | : 0.01 |                   |        |
| fragment_668.4325 | : 0.01 |                   |        |
| fragment_977.6375 | : 0.01 |                   |        |



rhabdus\_motif\_289.m2m

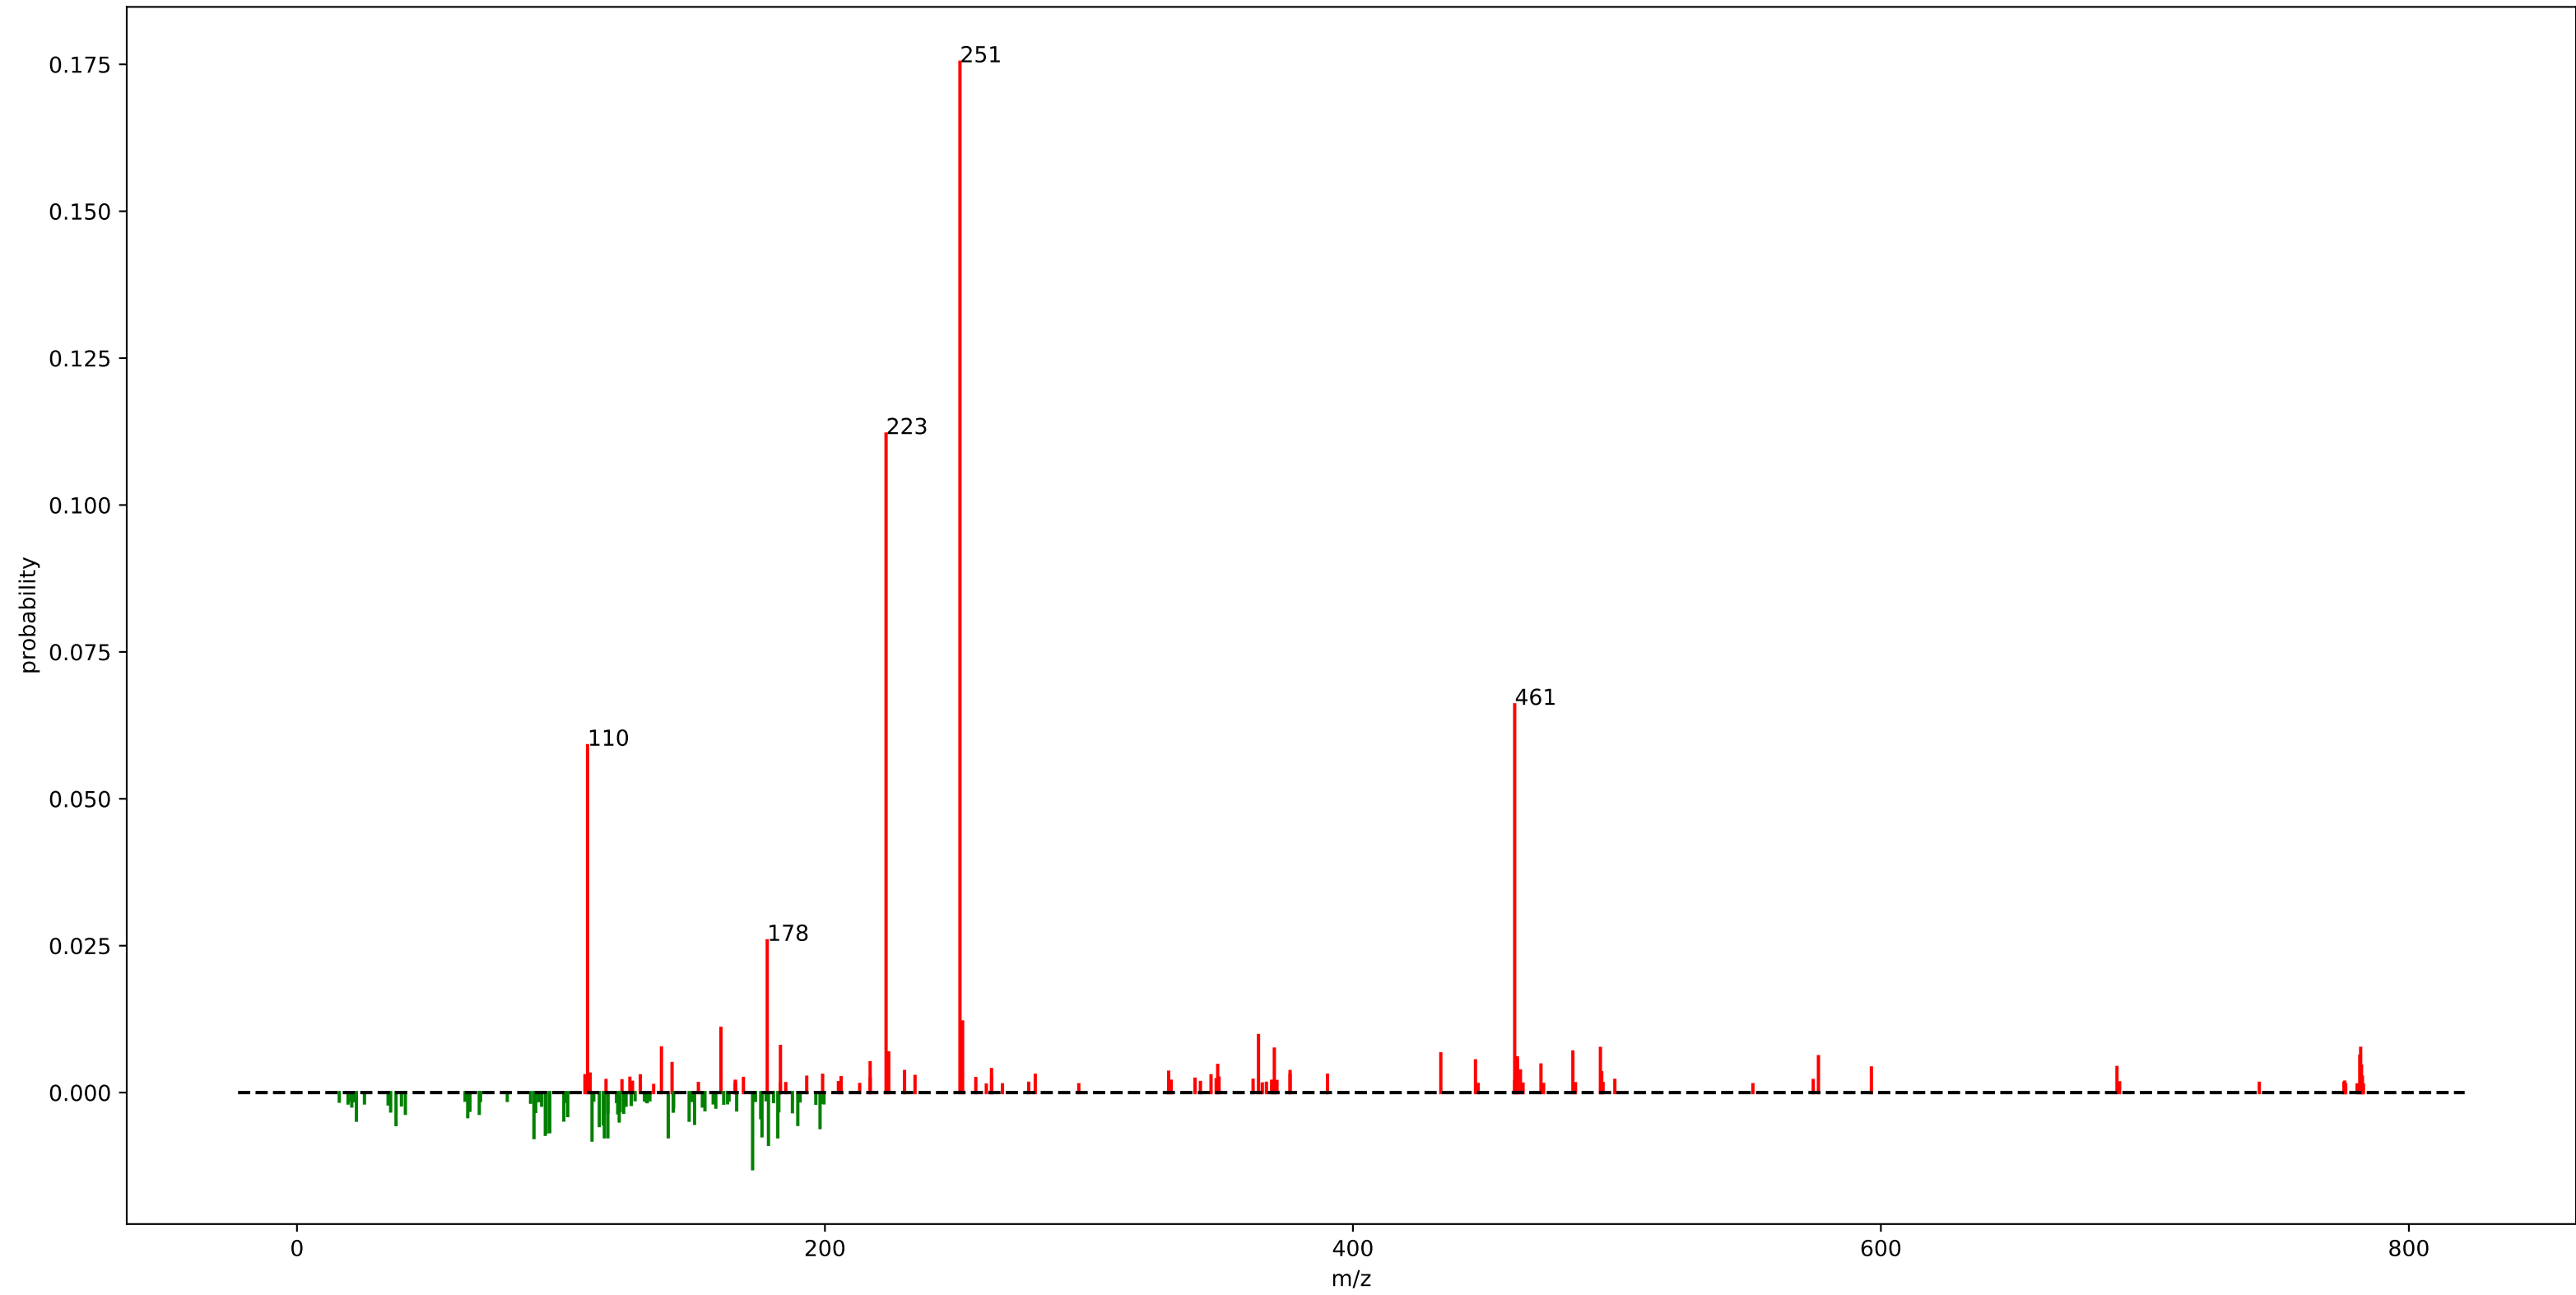

## rhabdus\_motif\_289.m2m

|                   |        |                   |        |
|-------------------|--------|-------------------|--------|
| fragment_251.1475 | : 0.18 | fragment_370.2325 | : 0.01 |
| fragment_223.1525 | : 0.11 | loss_176.1475     | : 0.01 |
| fragment_461.2875 | : 0.07 | loss_94.0725      | : 0.01 |
| fragment_110.0725 | : 0.06 | fragment_483.3225 | : 0.01 |
| fragment_178.1325 | : 0.03 | fragment_224.1575 | : 0.01 |
| loss_172.6075     | : 0.01 | loss_94.4475      | : 0.01 |
| fragment_252.1525 | : 0.01 | loss_95.7675      | : 0.01 |
| fragment_160.6075 | : 0.01 | fragment_433.2925 | : 0.01 |
| fragment_364.2325 | : 0.01 | fragment_781.4075 | : 0.01 |
| loss_178.6075     | : 0.01 | fragment_576.3475 | : 0.01 |
| loss_111.7725     | : 0.01 | loss_198.1475     | : 0.01 |
| fragment_183.1475 | : 0.01 | fragment_462.2875 | : 0.01 |
| loss_89.7775      | : 0.01 | loss_114.5375     | : 0.01 |
| fragment_138.0675 | : 0.01 | fragment_462.2925 | : 0.01 |
| loss_117.7625     | : 0.01 | loss_37.5275      | : 0.01 |
| fragment_781.7425 | : 0.01 | loss_189.7175     | : 0.01 |
| loss_182.1475     | : 0.01 | fragment_446.4325 | : 0.01 |
| loss_116.4425     | : 0.01 | loss_116.0675     | : 0.01 |
| fragment_493.7575 | : 0.01 | loss_150.6125     | : 0.01 |
| loss_140.6375     | : 0.01 | fragment_217.1275 | : 0.01 |

urine\_mass2motif\_1.m2m

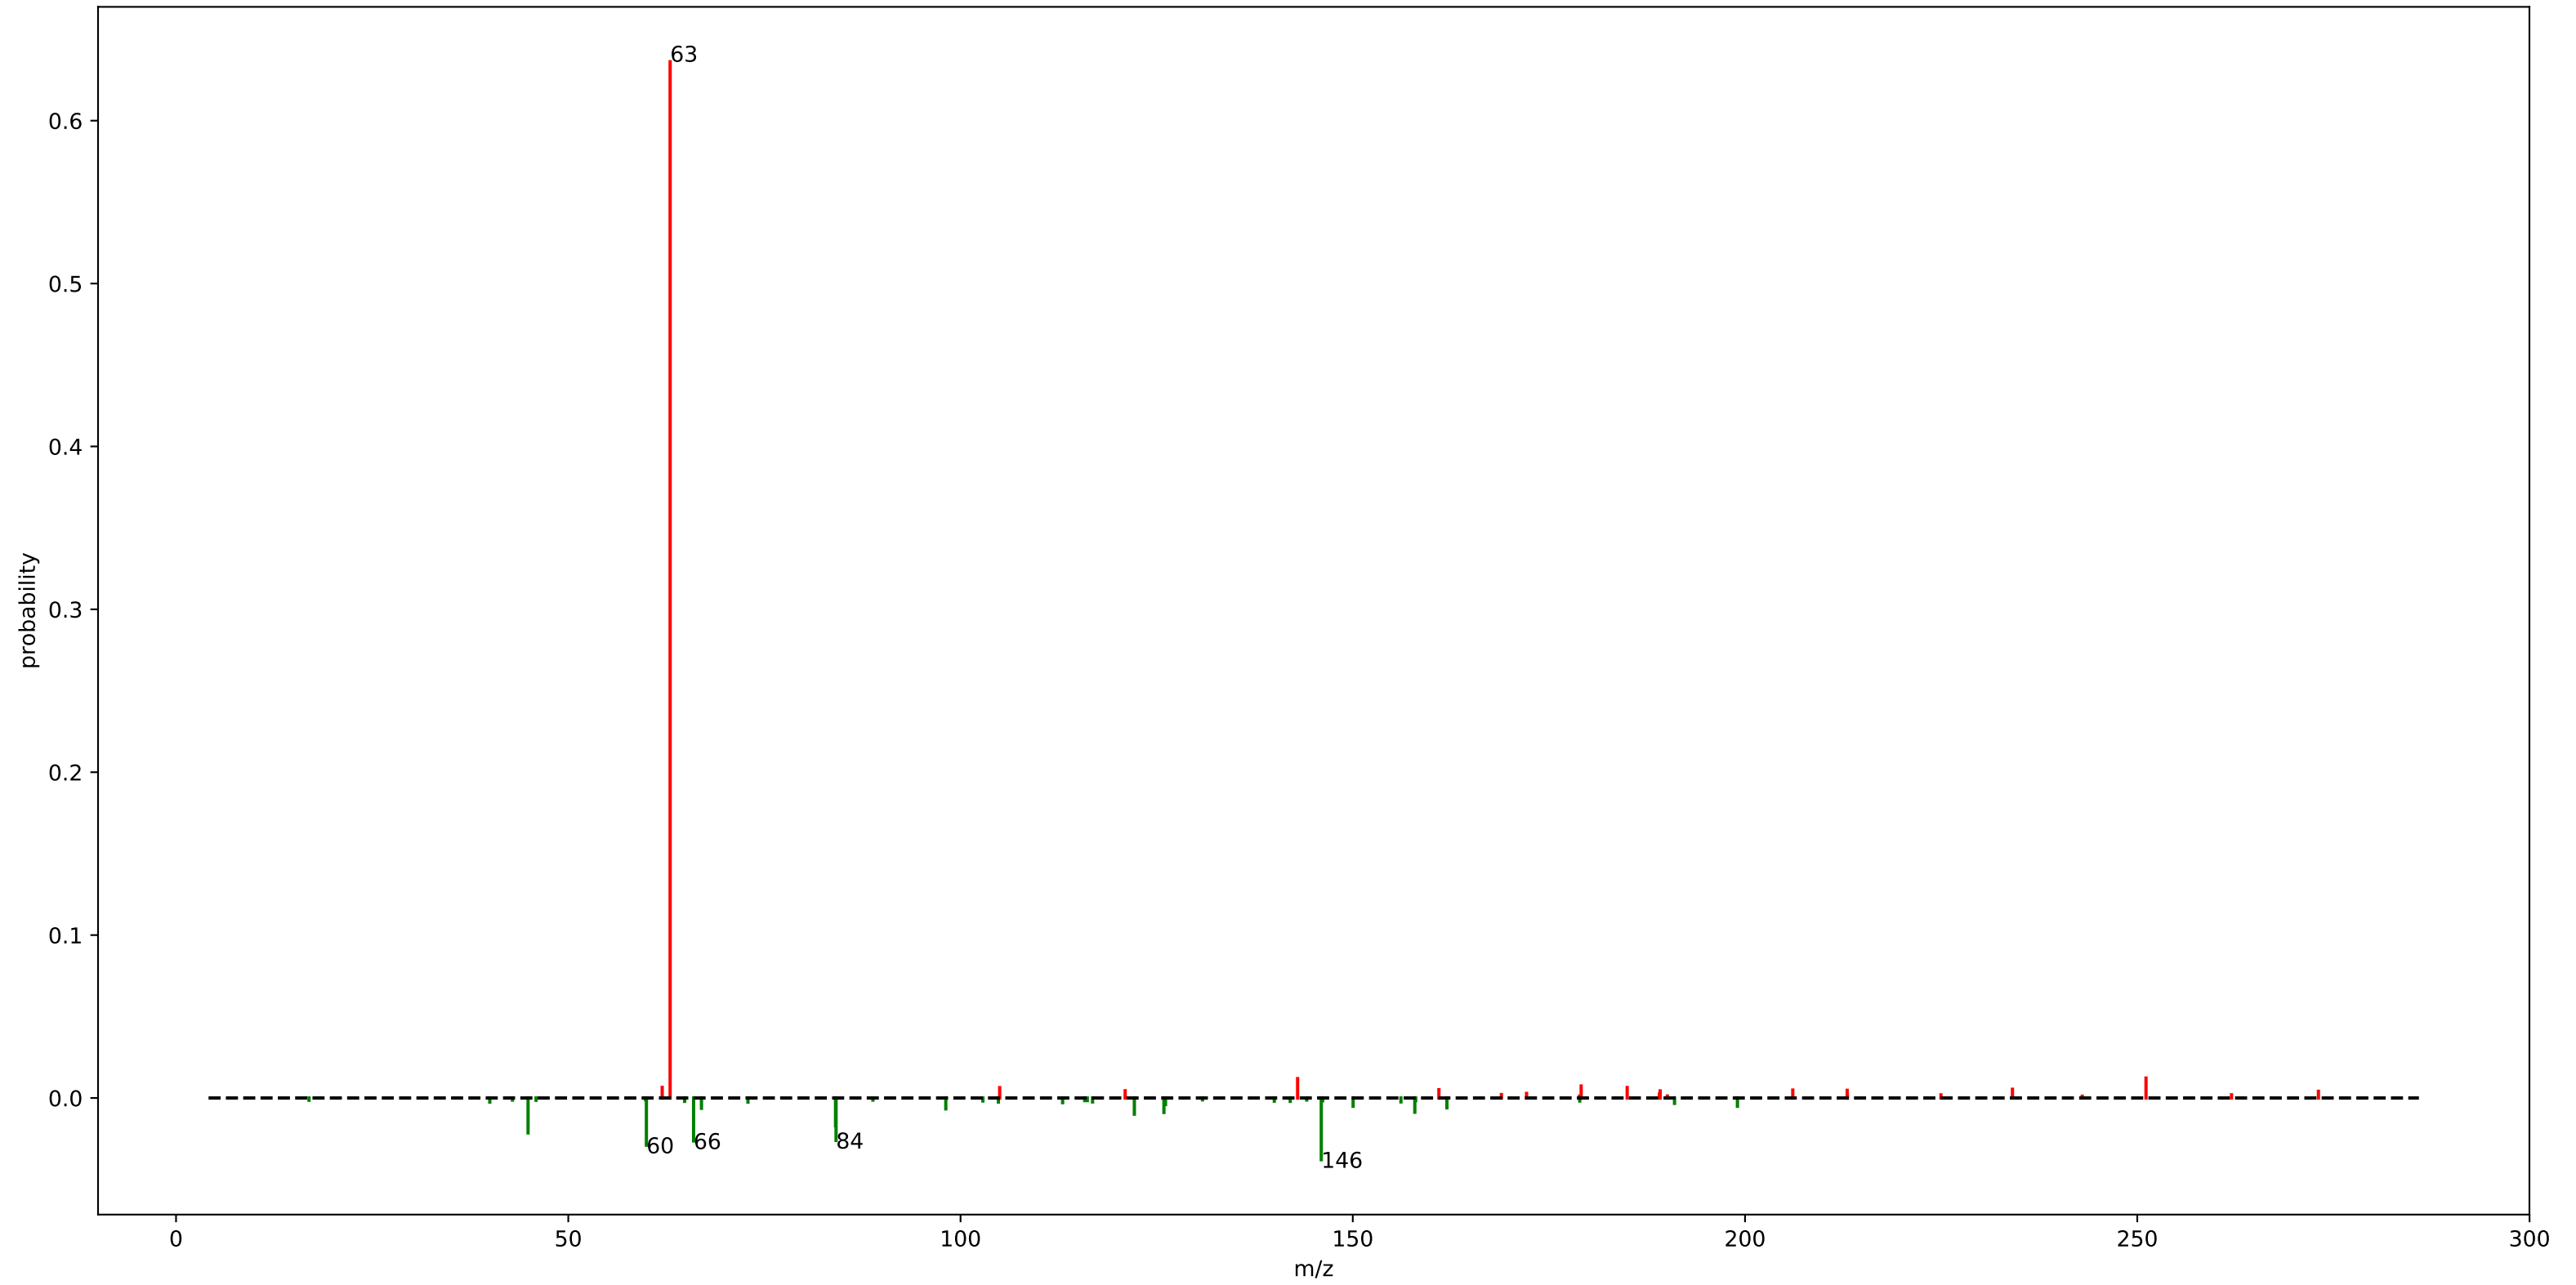

## urine\_mass2motif\_1.m2m

|                   |        |                   |        |
|-------------------|--------|-------------------|--------|
| fragment_62.9825  | : 0.64 | loss_199.0325     | : 0.01 |
| loss_145.9825     | : 0.04 | loss_150.0425     | : 0.01 |
| loss_59.9575      | : 0.03 | fragment_160.9775 | : 0.01 |
| loss_65.9725      | : 0.03 |                   |        |
| loss_84.1325      | : 0.03 |                   |        |
| loss_44.8725      | : 0.02 |                   |        |
| loss_84.0675      | : 0.02 |                   |        |
| fragment_251.1125 | : 0.01 |                   |        |
| fragment_142.9675 | : 0.01 |                   |        |
| loss_122.1575     | : 0.01 |                   |        |
| loss_125.9275     | : 0.01 |                   |        |
| loss_157.9075     | : 0.01 |                   |        |
| fragment_179.1125 | : 0.01 |                   |        |
| loss_98.1225      | : 0.01 |                   |        |
| fragment_61.9725  | : 0.01 |                   |        |
| fragment_184.9775 | : 0.01 |                   |        |
| fragment_104.9925 | : 0.01 |                   |        |
| loss_66.9775      | : 0.01 |                   |        |
| loss_161.9975     | : 0.01 |                   |        |
| fragment_234.0875 | : 0.01 |                   |        |

motif\_469

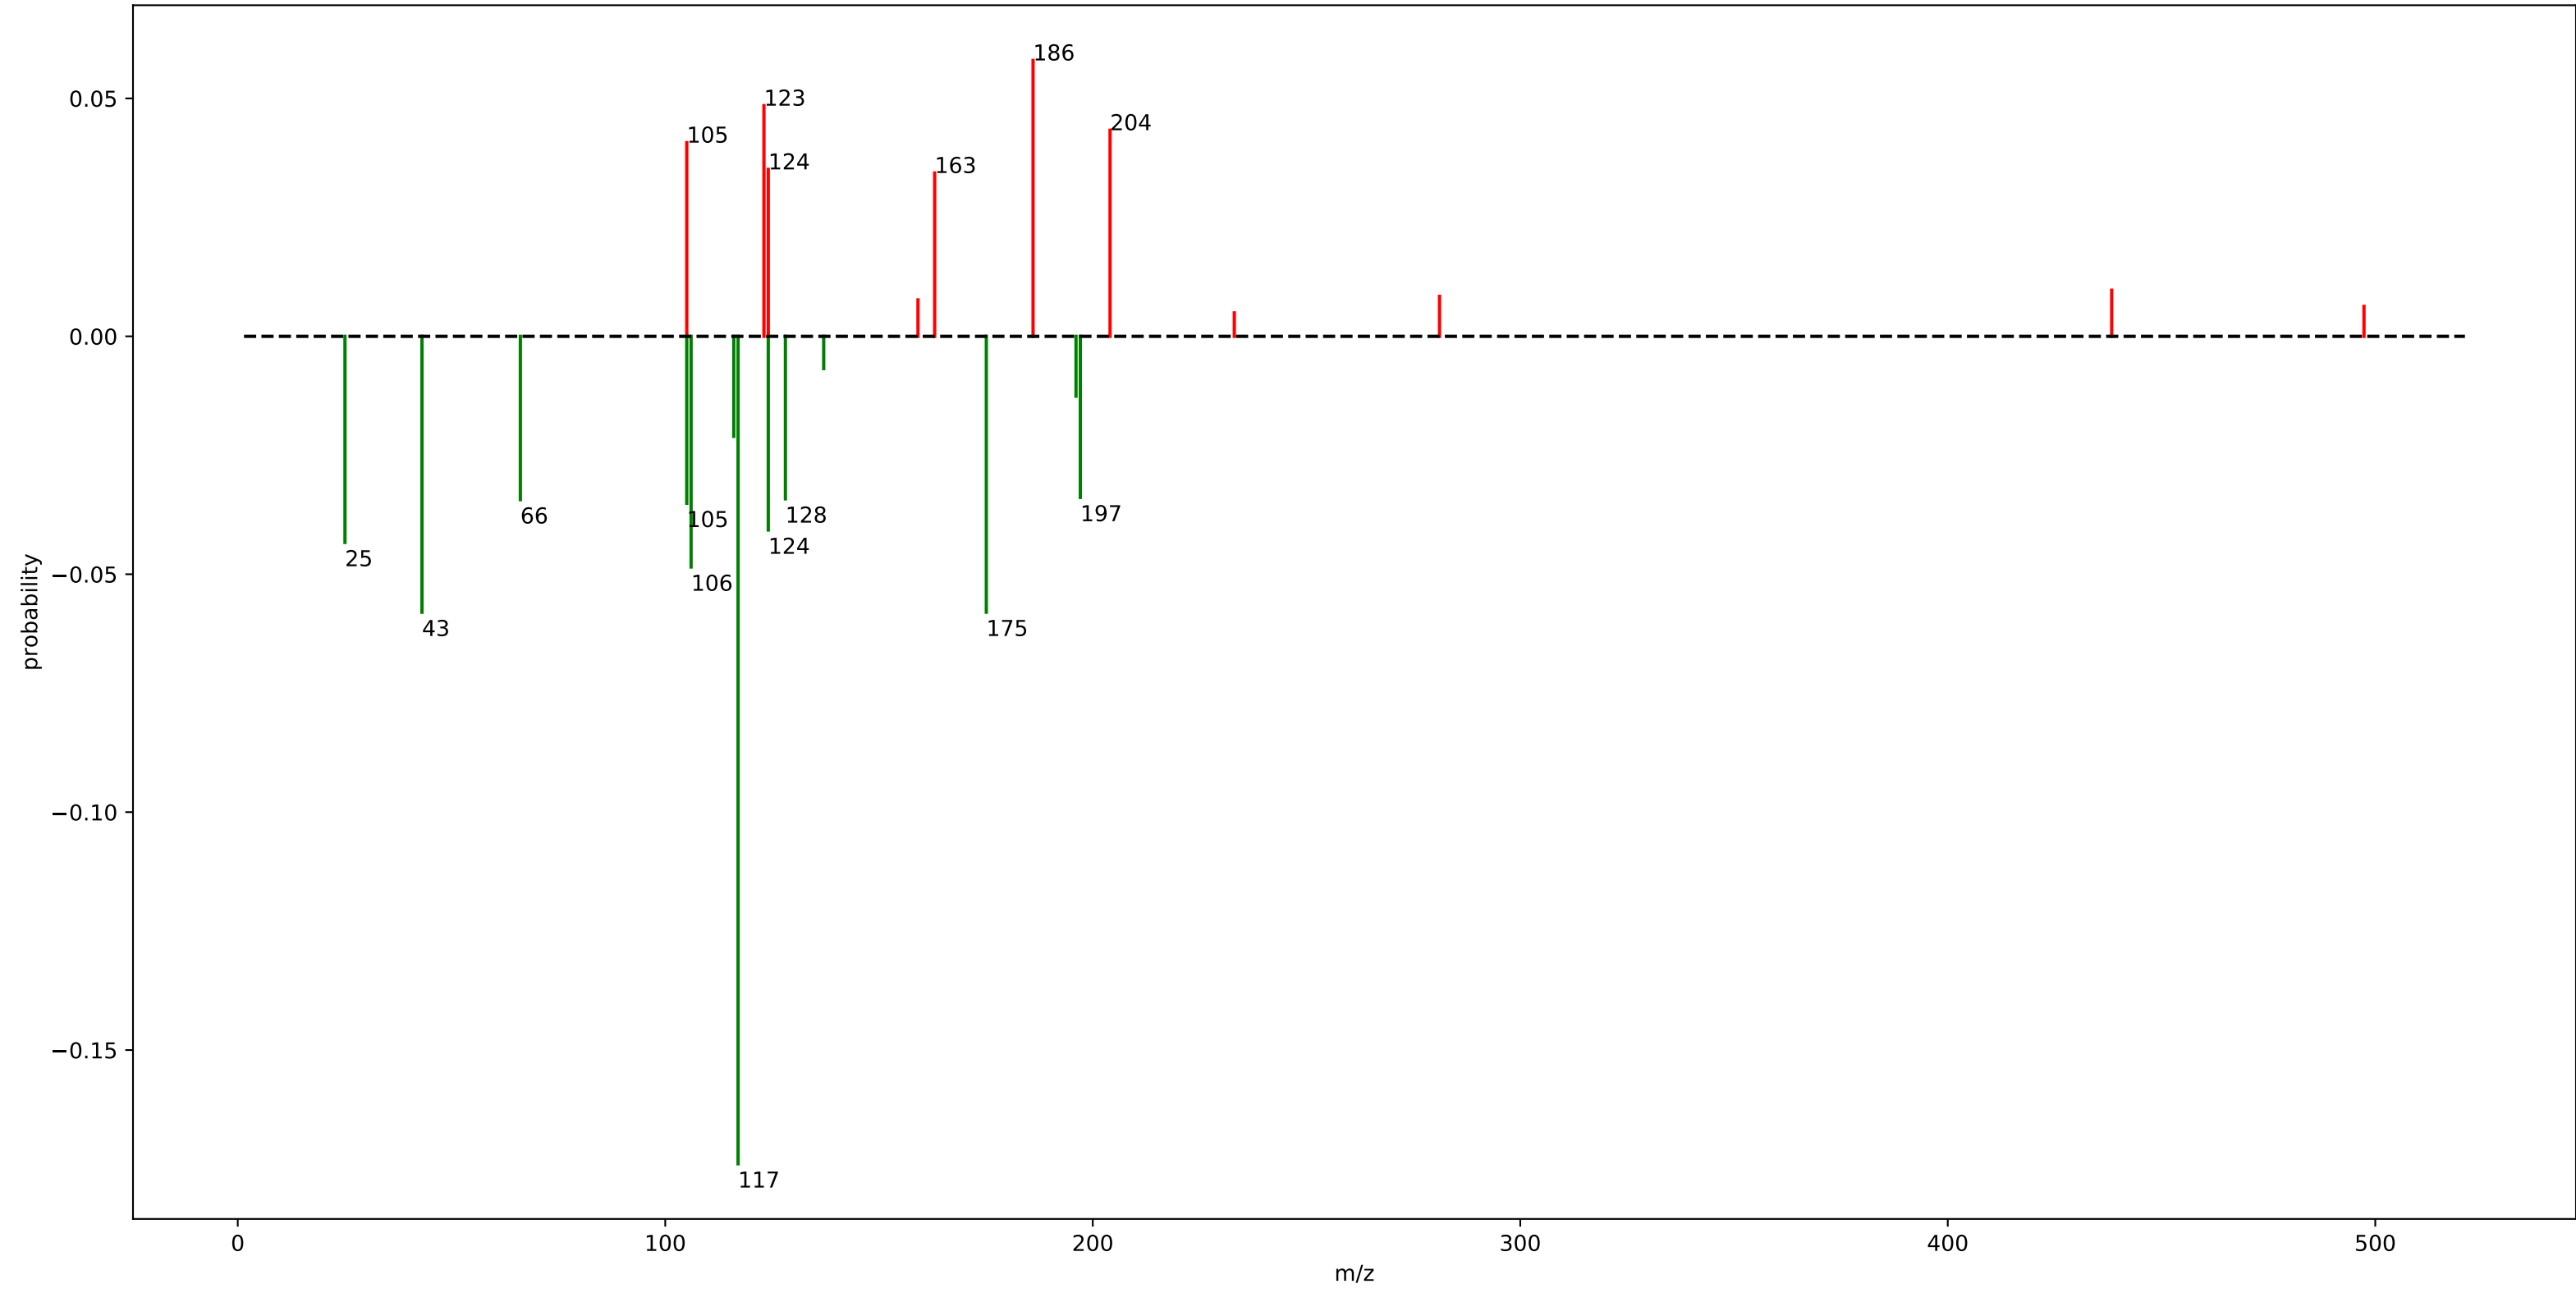

## motif\_469

|                   |        |                   |        |
|-------------------|--------|-------------------|--------|
| loss_117.0325     | : 0.17 | fragment_159.1175 | : 0.01 |
| fragment_186.0375 | : 0.06 | loss_137.0625     | : 0.01 |
| loss_43.0925      | : 0.06 | fragment_497.3625 | : 0.01 |
| loss_175.1025     | : 0.06 |                   |        |
| fragment_123.0875 | : 0.05 |                   |        |
| loss_106.0425     | : 0.05 |                   |        |
| loss_25.0825      | : 0.04 |                   |        |
| fragment_204.0475 | : 0.04 |                   |        |
| fragment_105.0325 | : 0.04 |                   |        |
| loss_124.0975     | : 0.04 |                   |        |
| fragment_124.0975 | : 0.04 |                   |        |
| loss_105.0325     | : 0.04 |                   |        |
| loss_66.1075      | : 0.03 |                   |        |
| fragment_163.0225 | : 0.03 |                   |        |
| loss_128.1075     | : 0.03 |                   |        |
| loss_197.0875     | : 0.03 |                   |        |
| loss_116.0275     | : 0.02 |                   |        |
| loss_196.0825     | : 0.01 |                   |        |
| fragment_438.3475 | : 0.01 |                   |        |
| fragment_281.1125 | : 0.01 |                   |        |

motif\_468

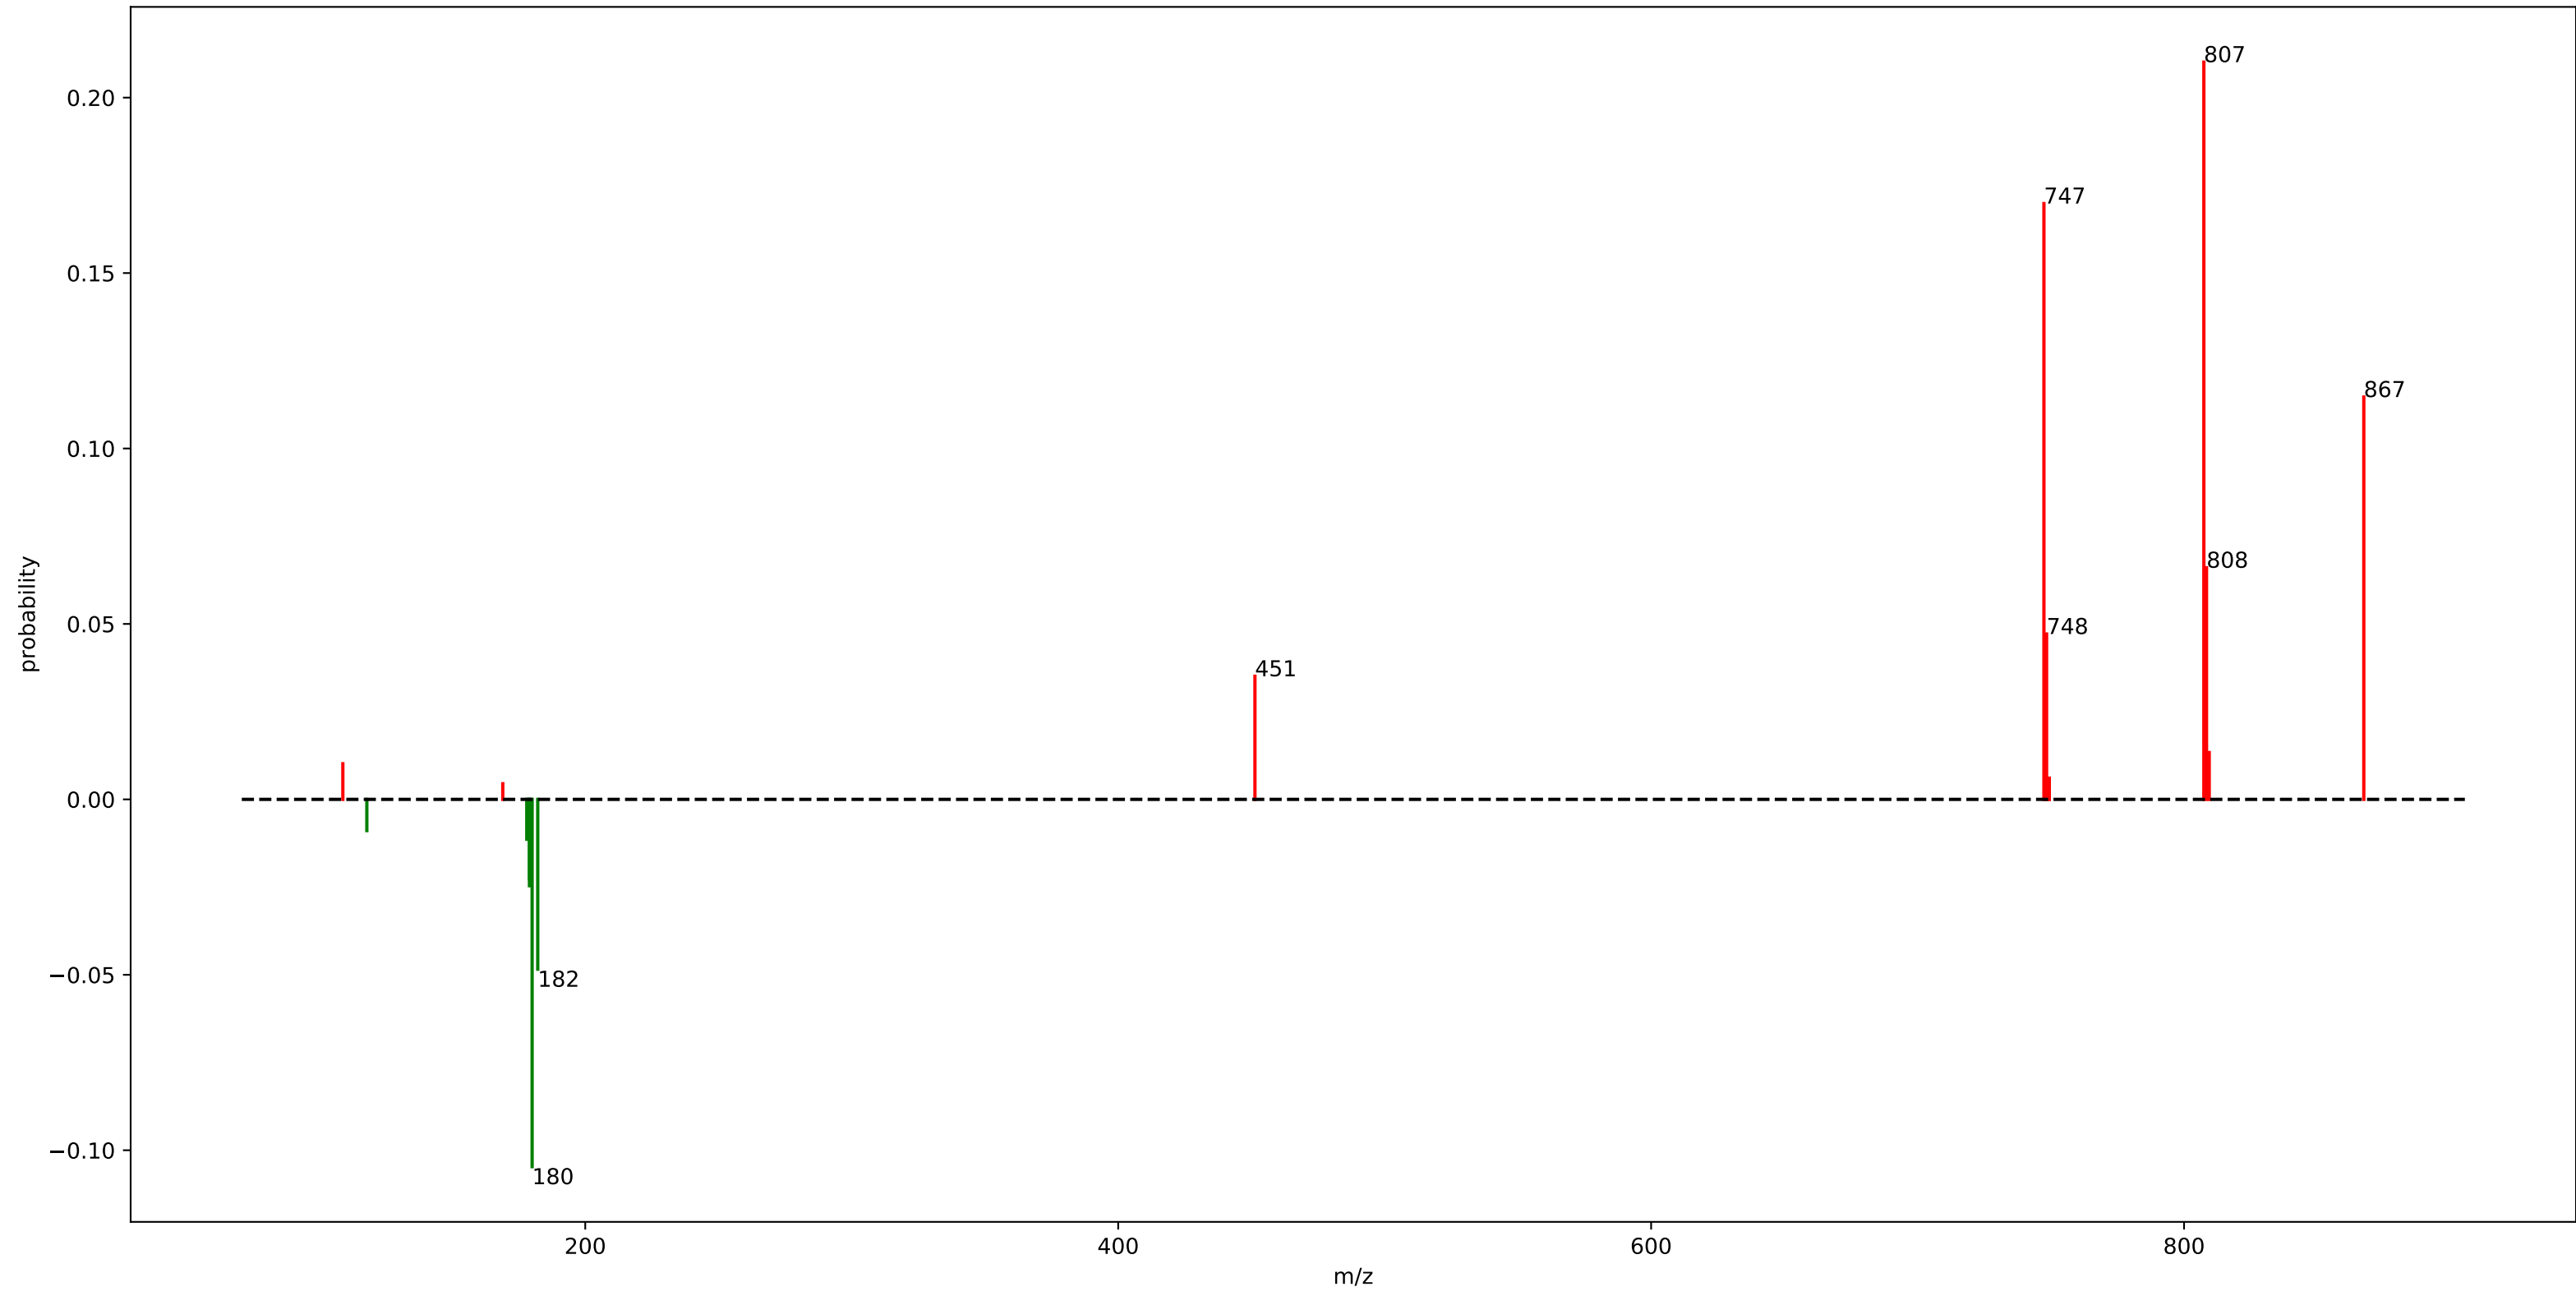

## motif\_468

|                   |        |
|-------------------|--------|
| fragment_807.4275 | : 0.21 |
| fragment_747.4075 | : 0.17 |
| fragment_867.4525 | : 0.11 |
| loss_180.0575     | : 0.10 |
| fragment_808.4325 | : 0.07 |
| loss_182.1675     | : 0.05 |
| fragment_748.4125 | : 0.05 |
| fragment_451.3225 | : 0.04 |
| loss_179.0525     | : 0.02 |
| loss_179.0575     | : 0.02 |
| fragment_809.4375 | : 0.01 |
| loss_178.0525     | : 0.01 |
| fragment_109.0275 | : 0.01 |
| loss_118.0325     | : 0.01 |
| fragment_749.4175 | : 0.01 |
| fragment_749.4125 | : 0.01 |



StrepSalini\_motif\_168.m2m

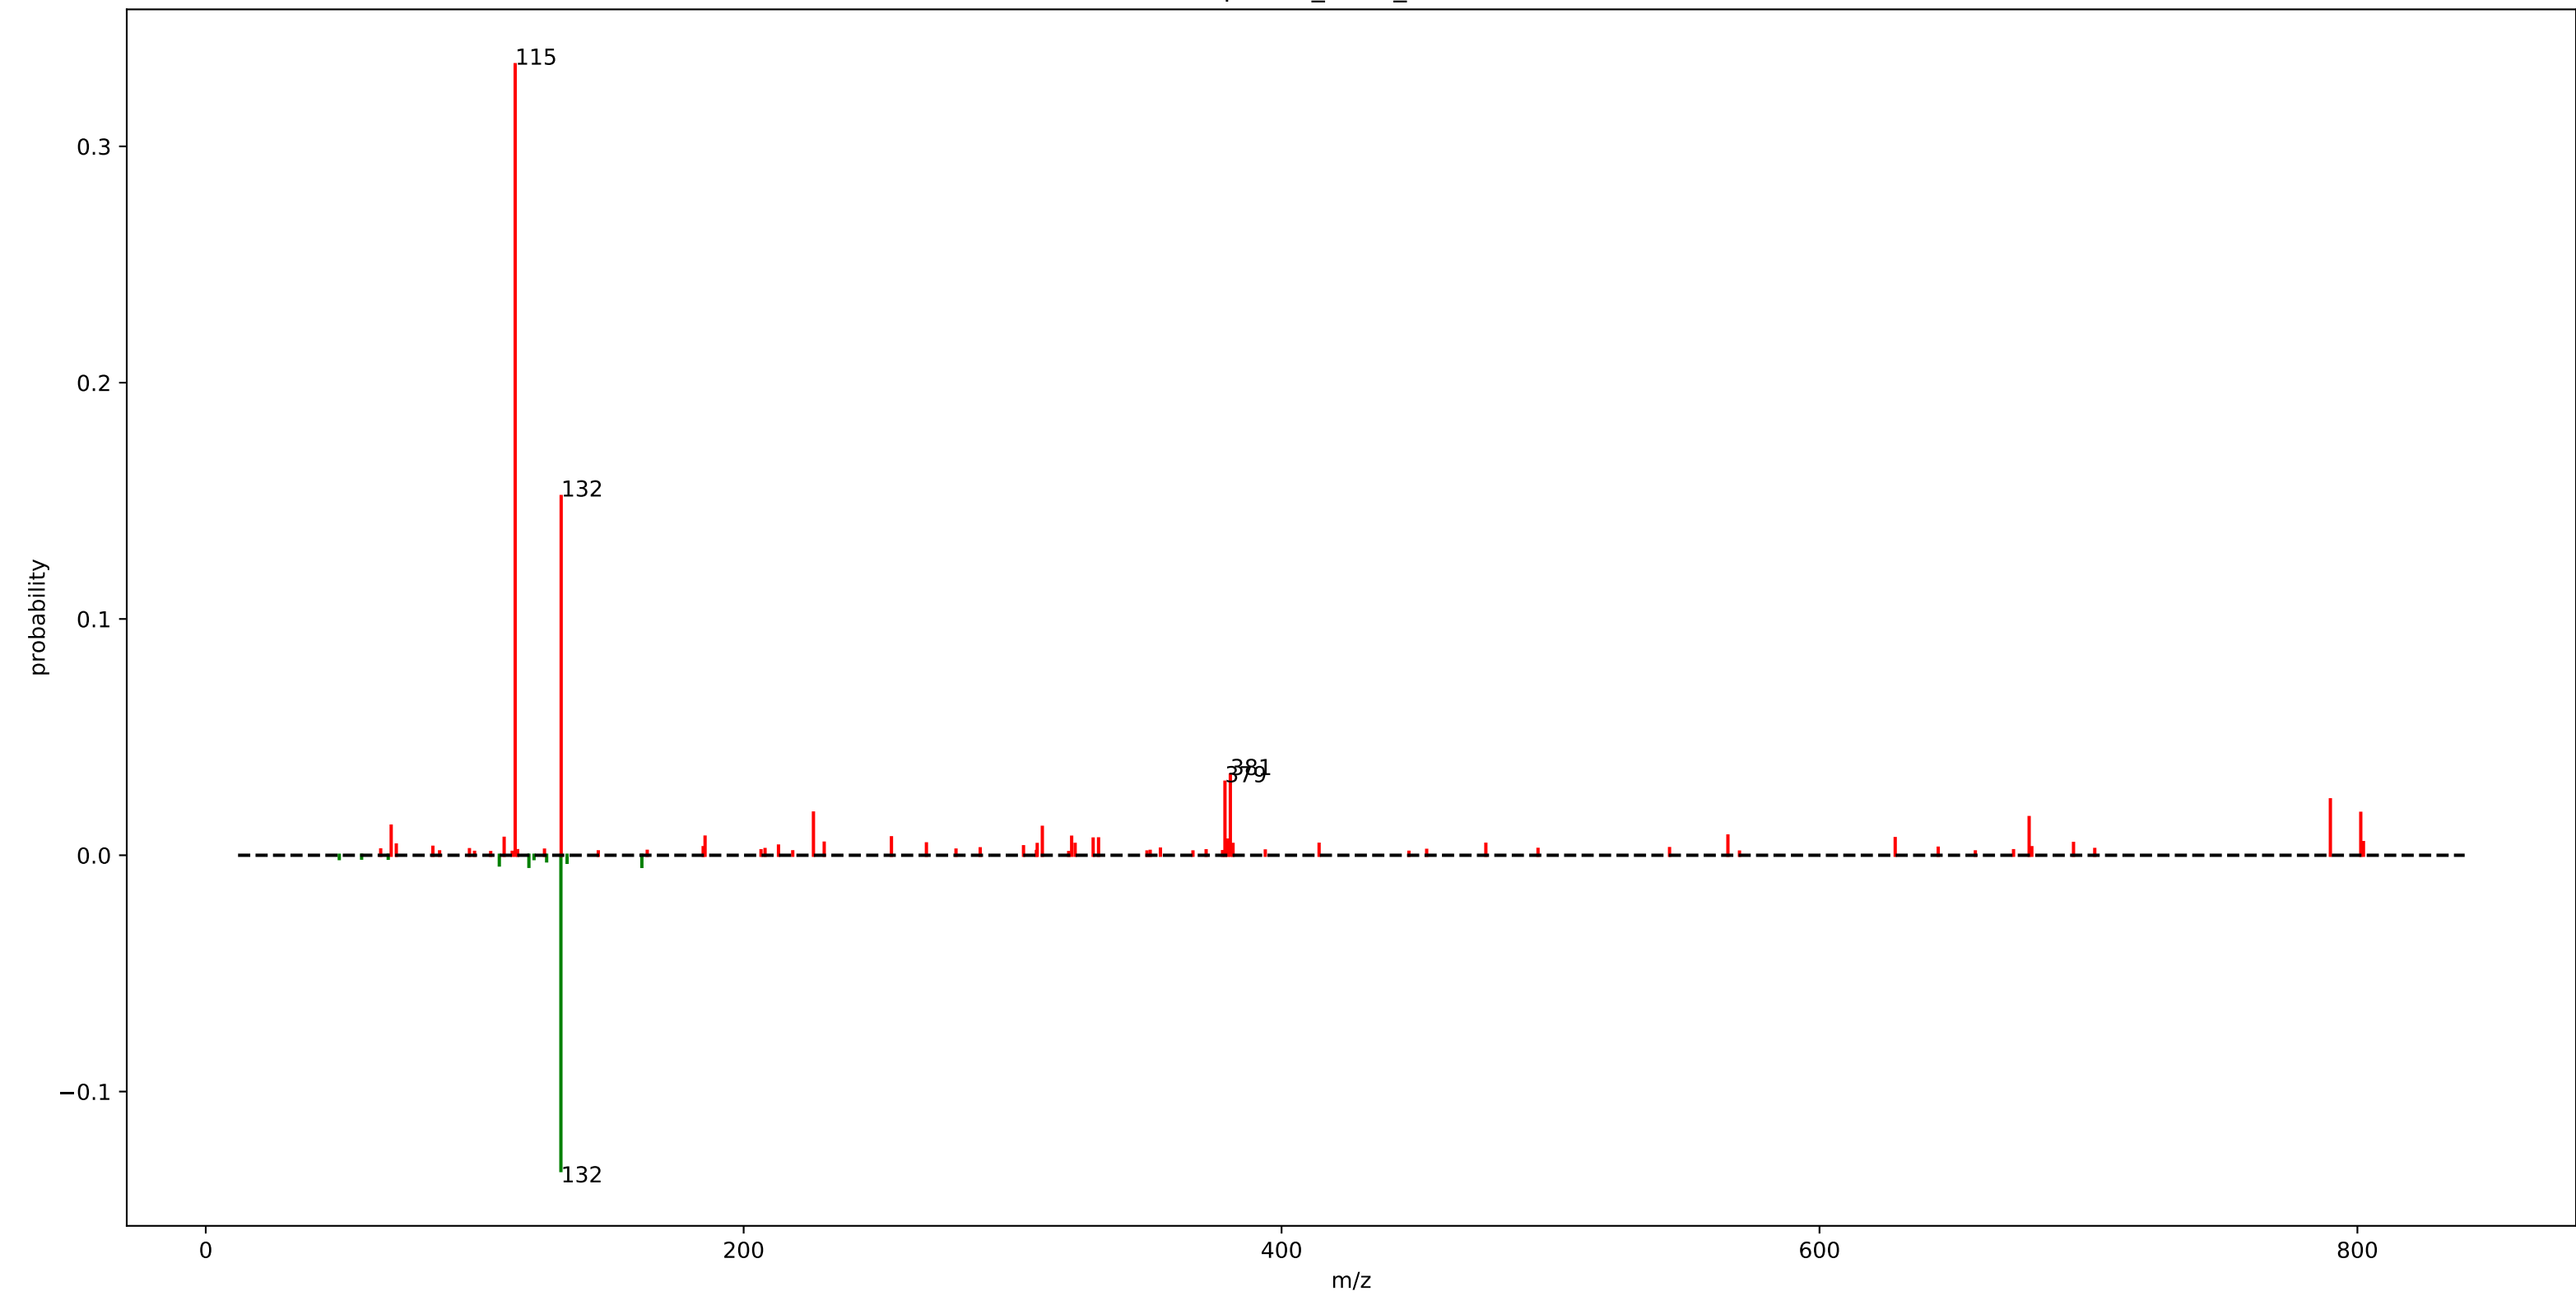

## StrepSalini\_motif\_168.m2m

|                   |        |                   |        |
|-------------------|--------|-------------------|--------|
| fragment_115.0500 | : 0.33 | fragment_802.2500 | : 0.01 |
| fragment_132.1500 | : 0.15 | fragment_229.9500 | : 0.01 |
| loss_132.0500     | : 0.13 | fragment_694.4500 | : 0.01 |
| fragment_380.9500 | : 0.03 |                   |        |
| fragment_378.9500 | : 0.03 |                   |        |
| fragment_789.9500 | : 0.02 |                   |        |
| fragment_225.9500 | : 0.02 |                   |        |
| fragment_801.2500 | : 0.02 |                   |        |
| fragment_677.9500 | : 0.02 |                   |        |
| fragment_68.9500  | : 0.01 |                   |        |
| fragment_311.0500 | : 0.01 |                   |        |
| fragment_565.9500 | : 0.01 |                   |        |
| fragment_185.6500 | : 0.01 |                   |        |
| fragment_321.9500 | : 0.01 |                   |        |
| fragment_254.9500 | : 0.01 |                   |        |
| fragment_110.9500 | : 0.01 |                   |        |
| fragment_628.1500 | : 0.01 |                   |        |
| fragment_331.9500 | : 0.01 |                   |        |
| fragment_329.9500 | : 0.01 |                   |        |
| fragment_379.9500 | : 0.01 |                   |        |

motif\_463

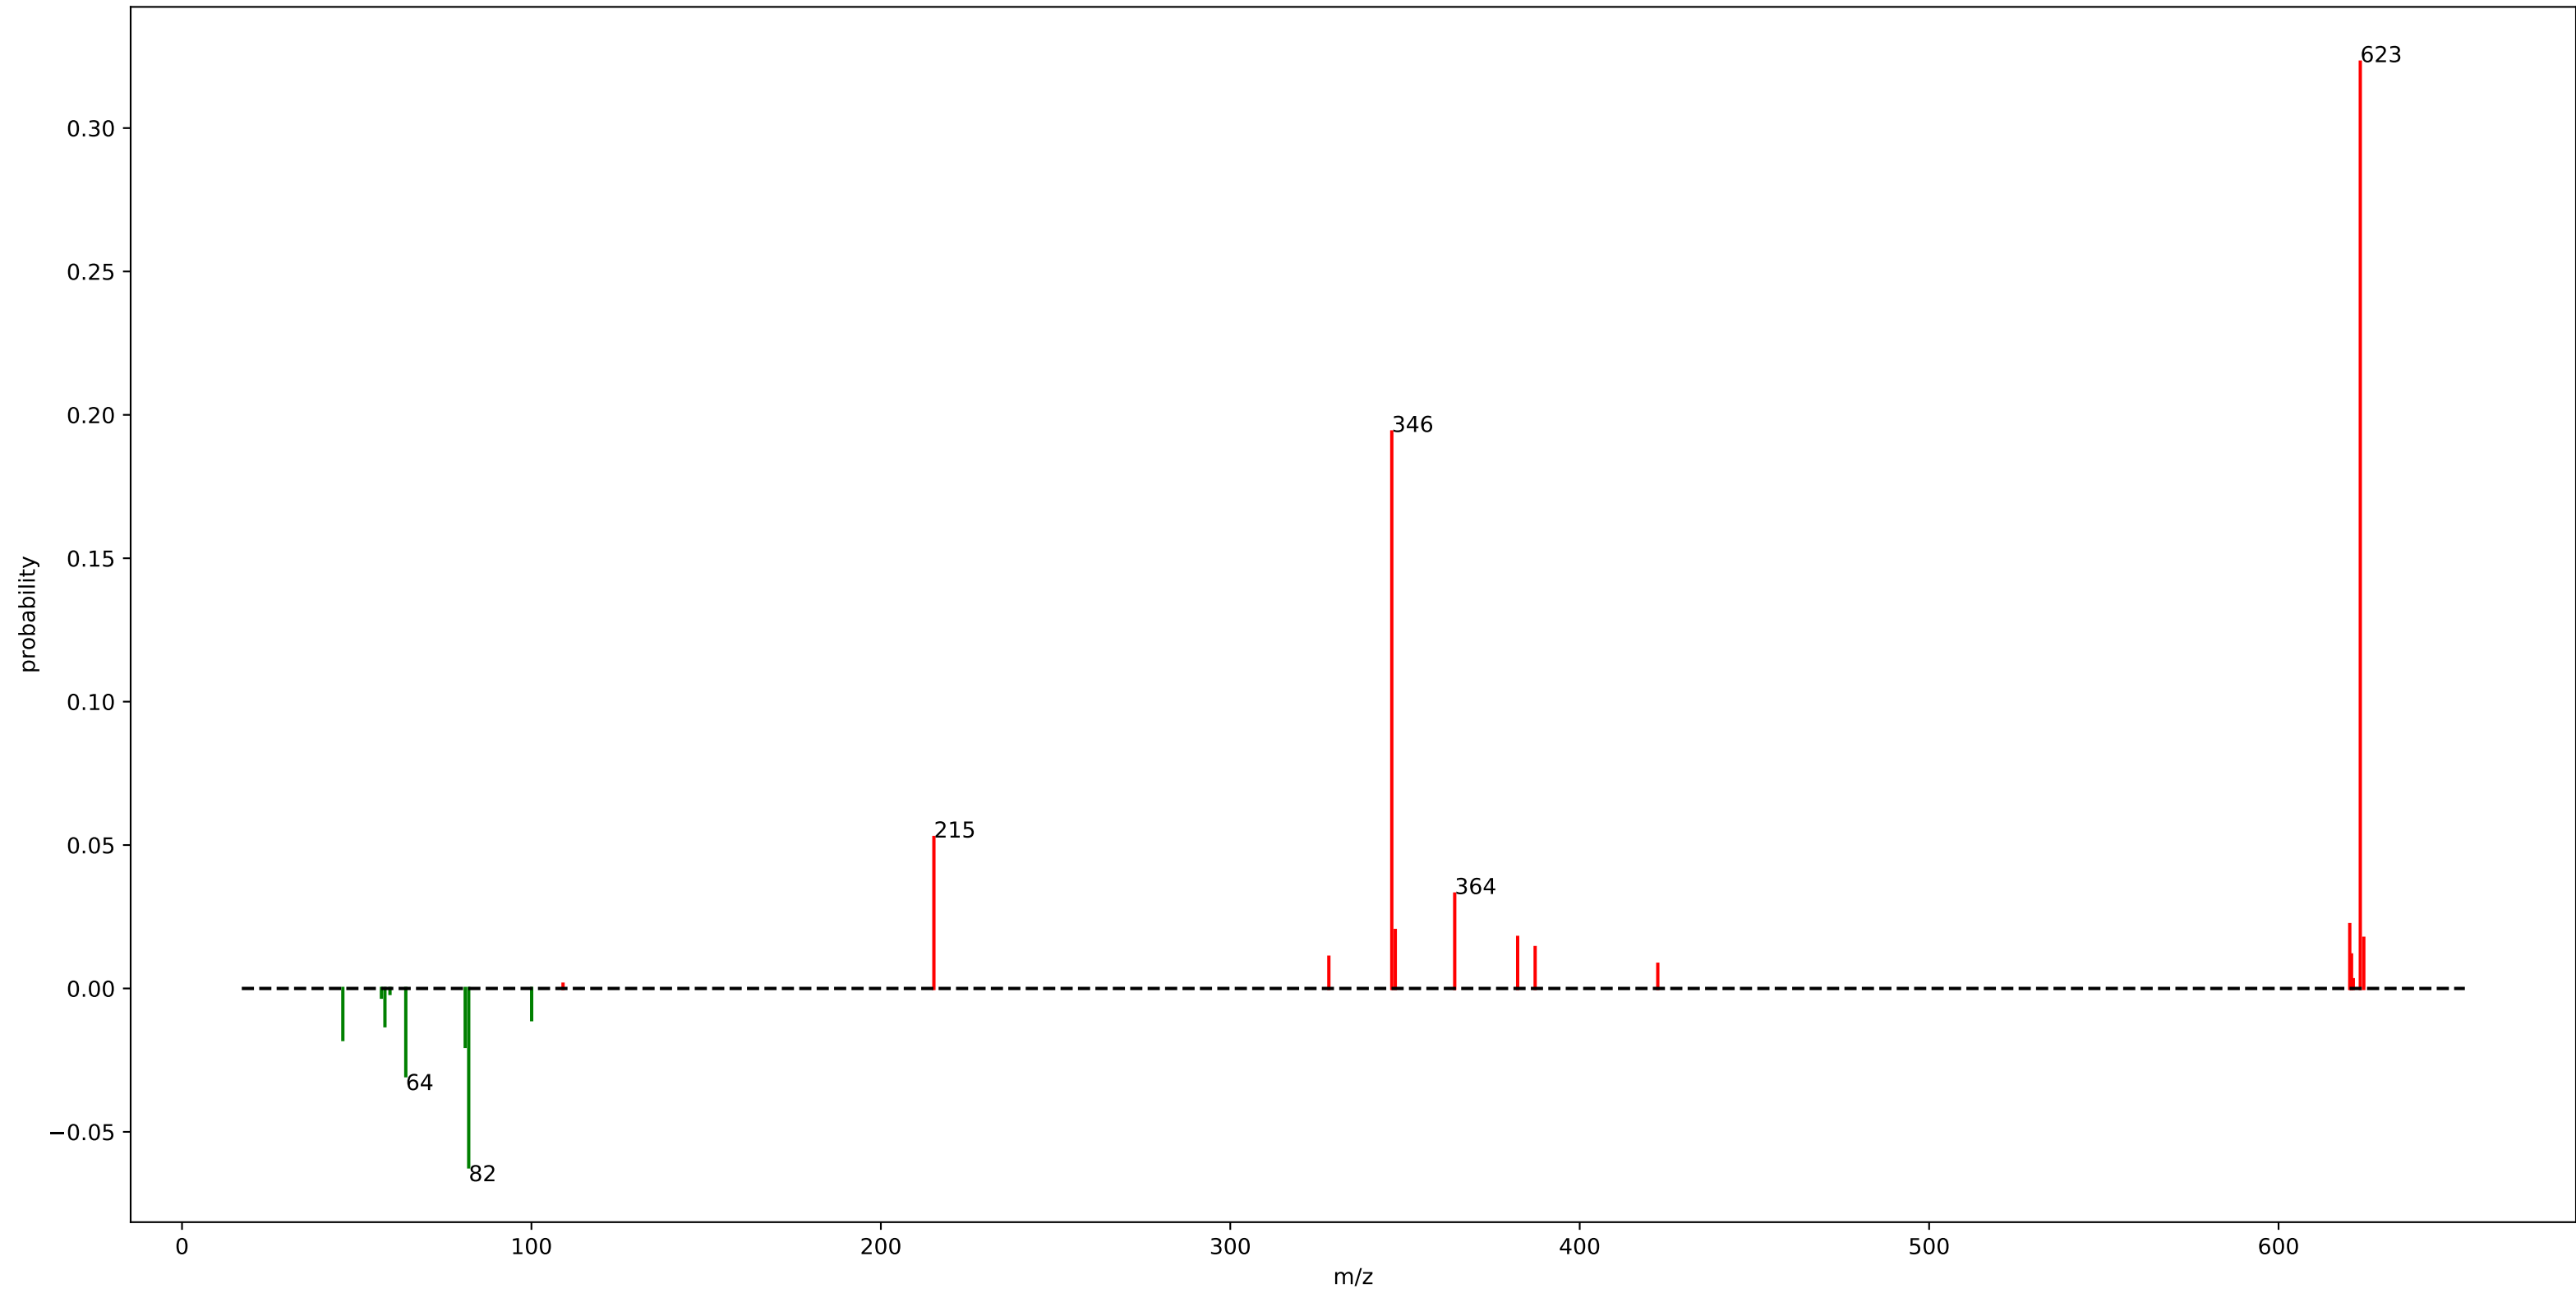

## motif\_463

|                   |        |
|-------------------|--------|
| fragment_623.3925 | : 0.32 |
| fragment_346.2225 | : 0.19 |
| loss_82.0525      | : 0.06 |
| fragment_215.1775 | : 0.05 |
| fragment_364.2325 | : 0.03 |
| loss_64.0425      | : 0.03 |
| fragment_620.3825 | : 0.02 |
| loss_81.0475      | : 0.02 |
| fragment_347.2225 | : 0.02 |
| loss_46.0275      | : 0.02 |
| fragment_382.2425 | : 0.02 |
| fragment_624.3975 | : 0.02 |
| fragment_387.2475 | : 0.01 |
| loss_58.0725      | : 0.01 |
| fragment_620.8875 | : 0.01 |
| loss_100.0625     | : 0.01 |
| fragment_328.2125 | : 0.01 |
| fragment_422.3475 | : 0.01 |

motif\_462

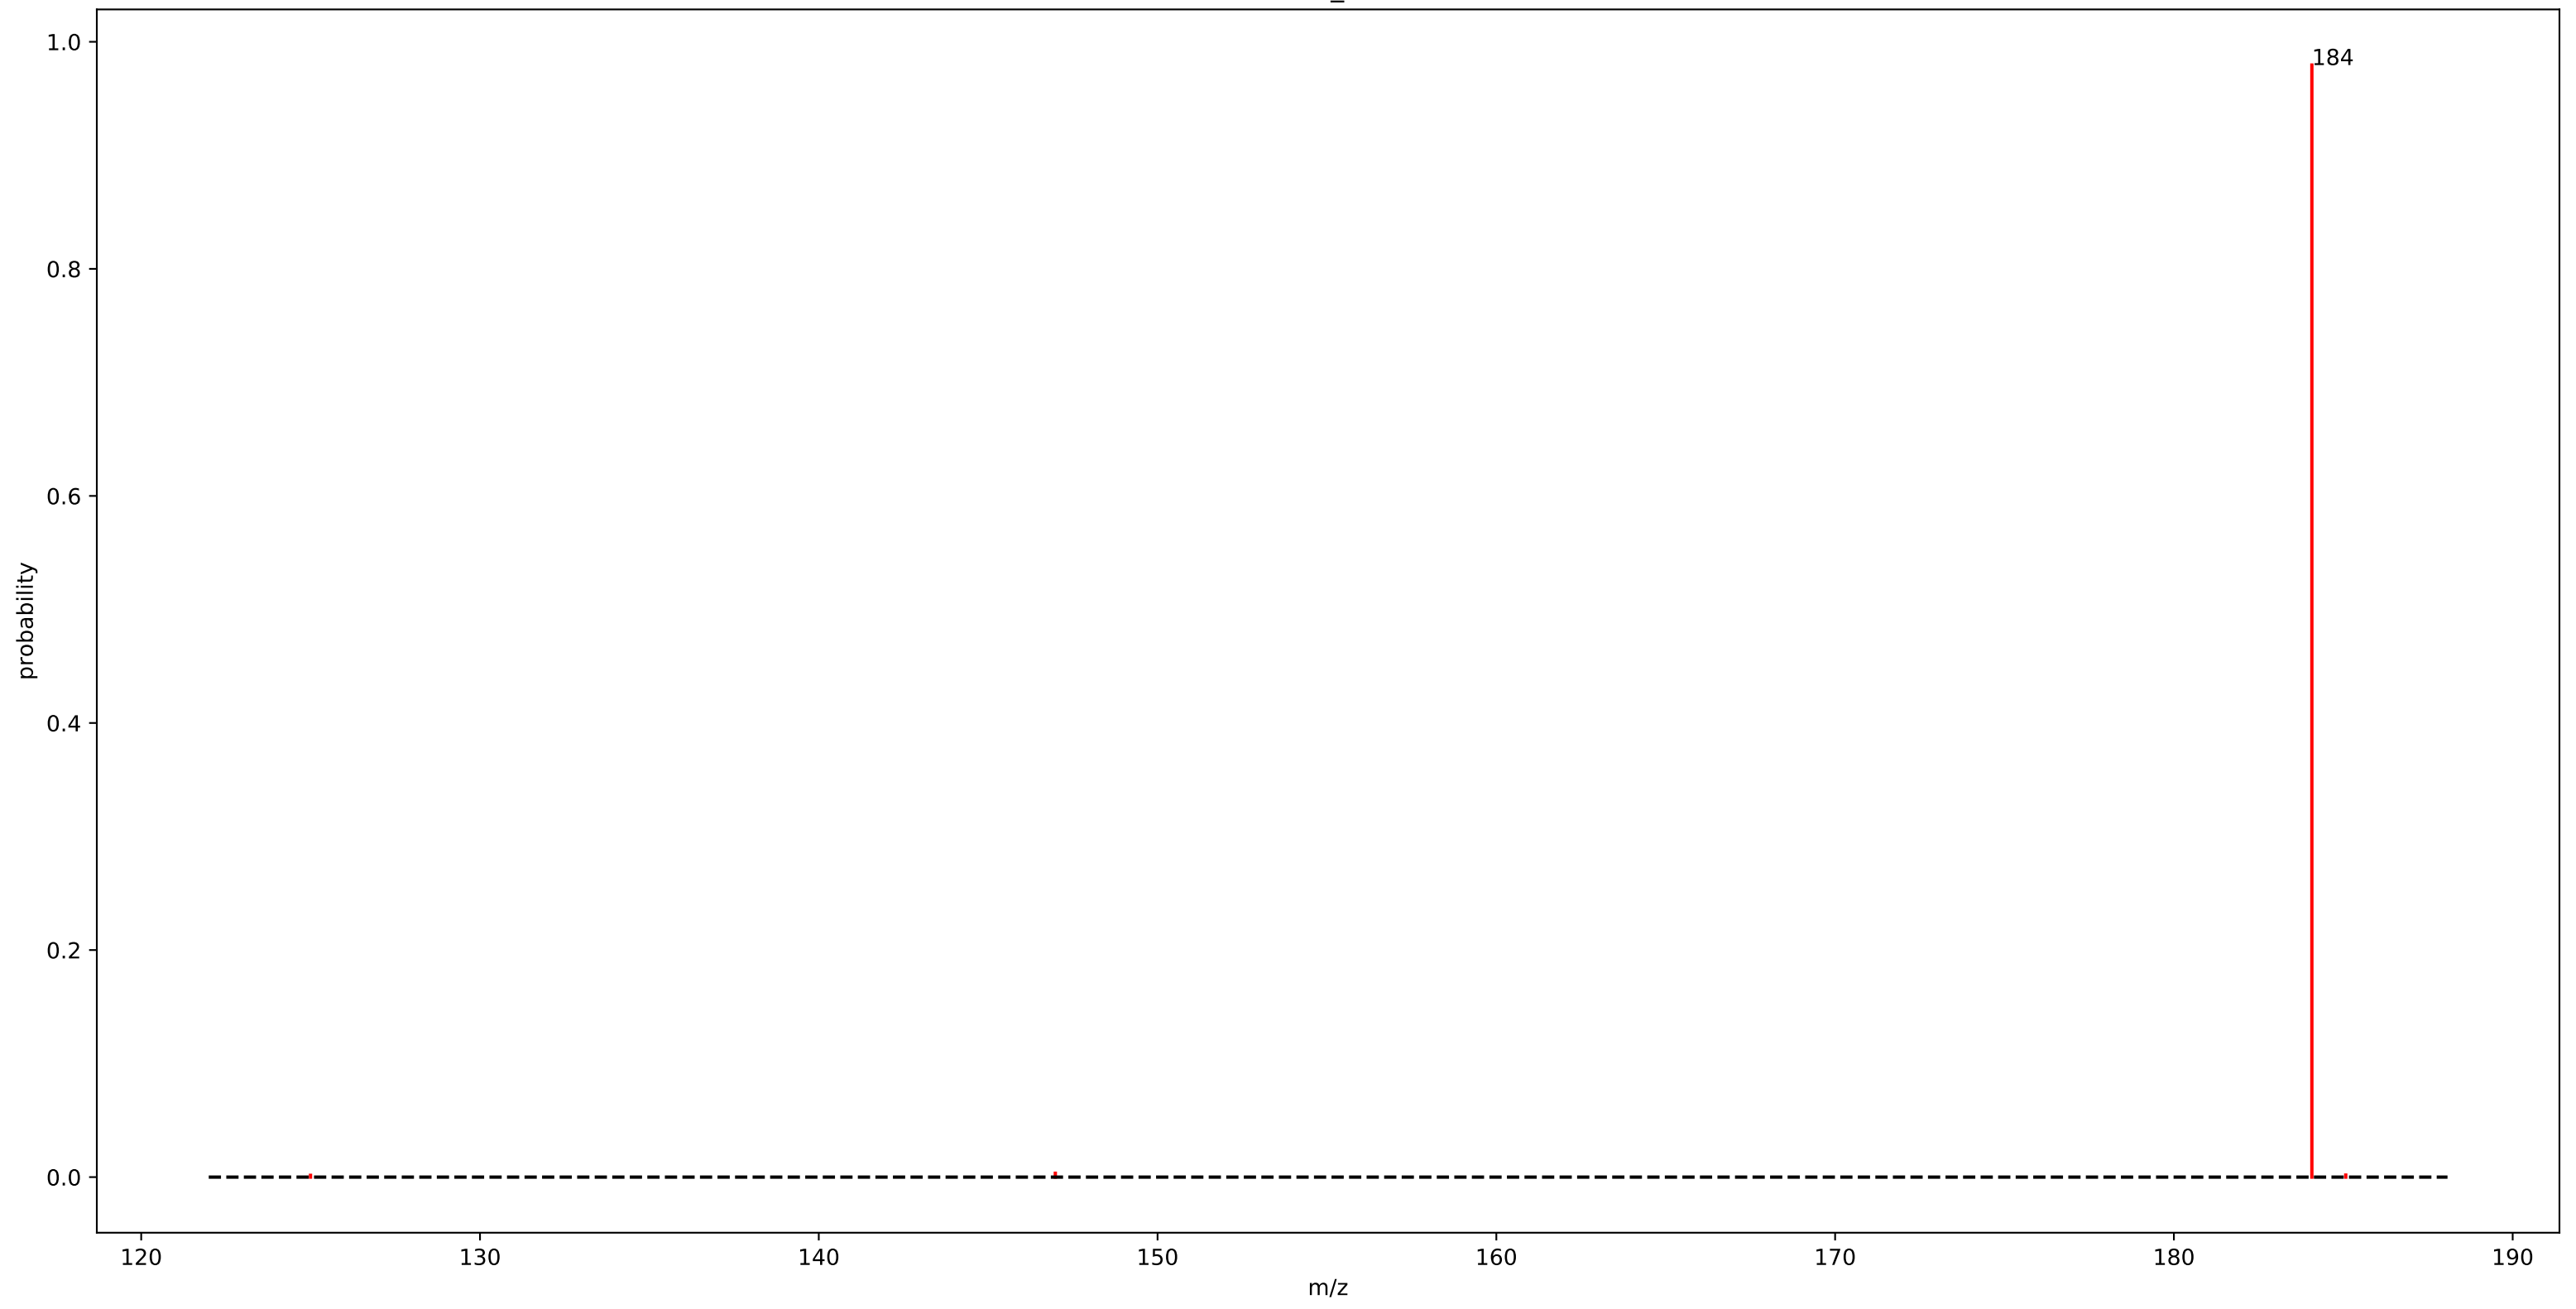

## motif\_462

fragment\_184.0725 : 0.98

urine\_mass2motif\_181.m2m

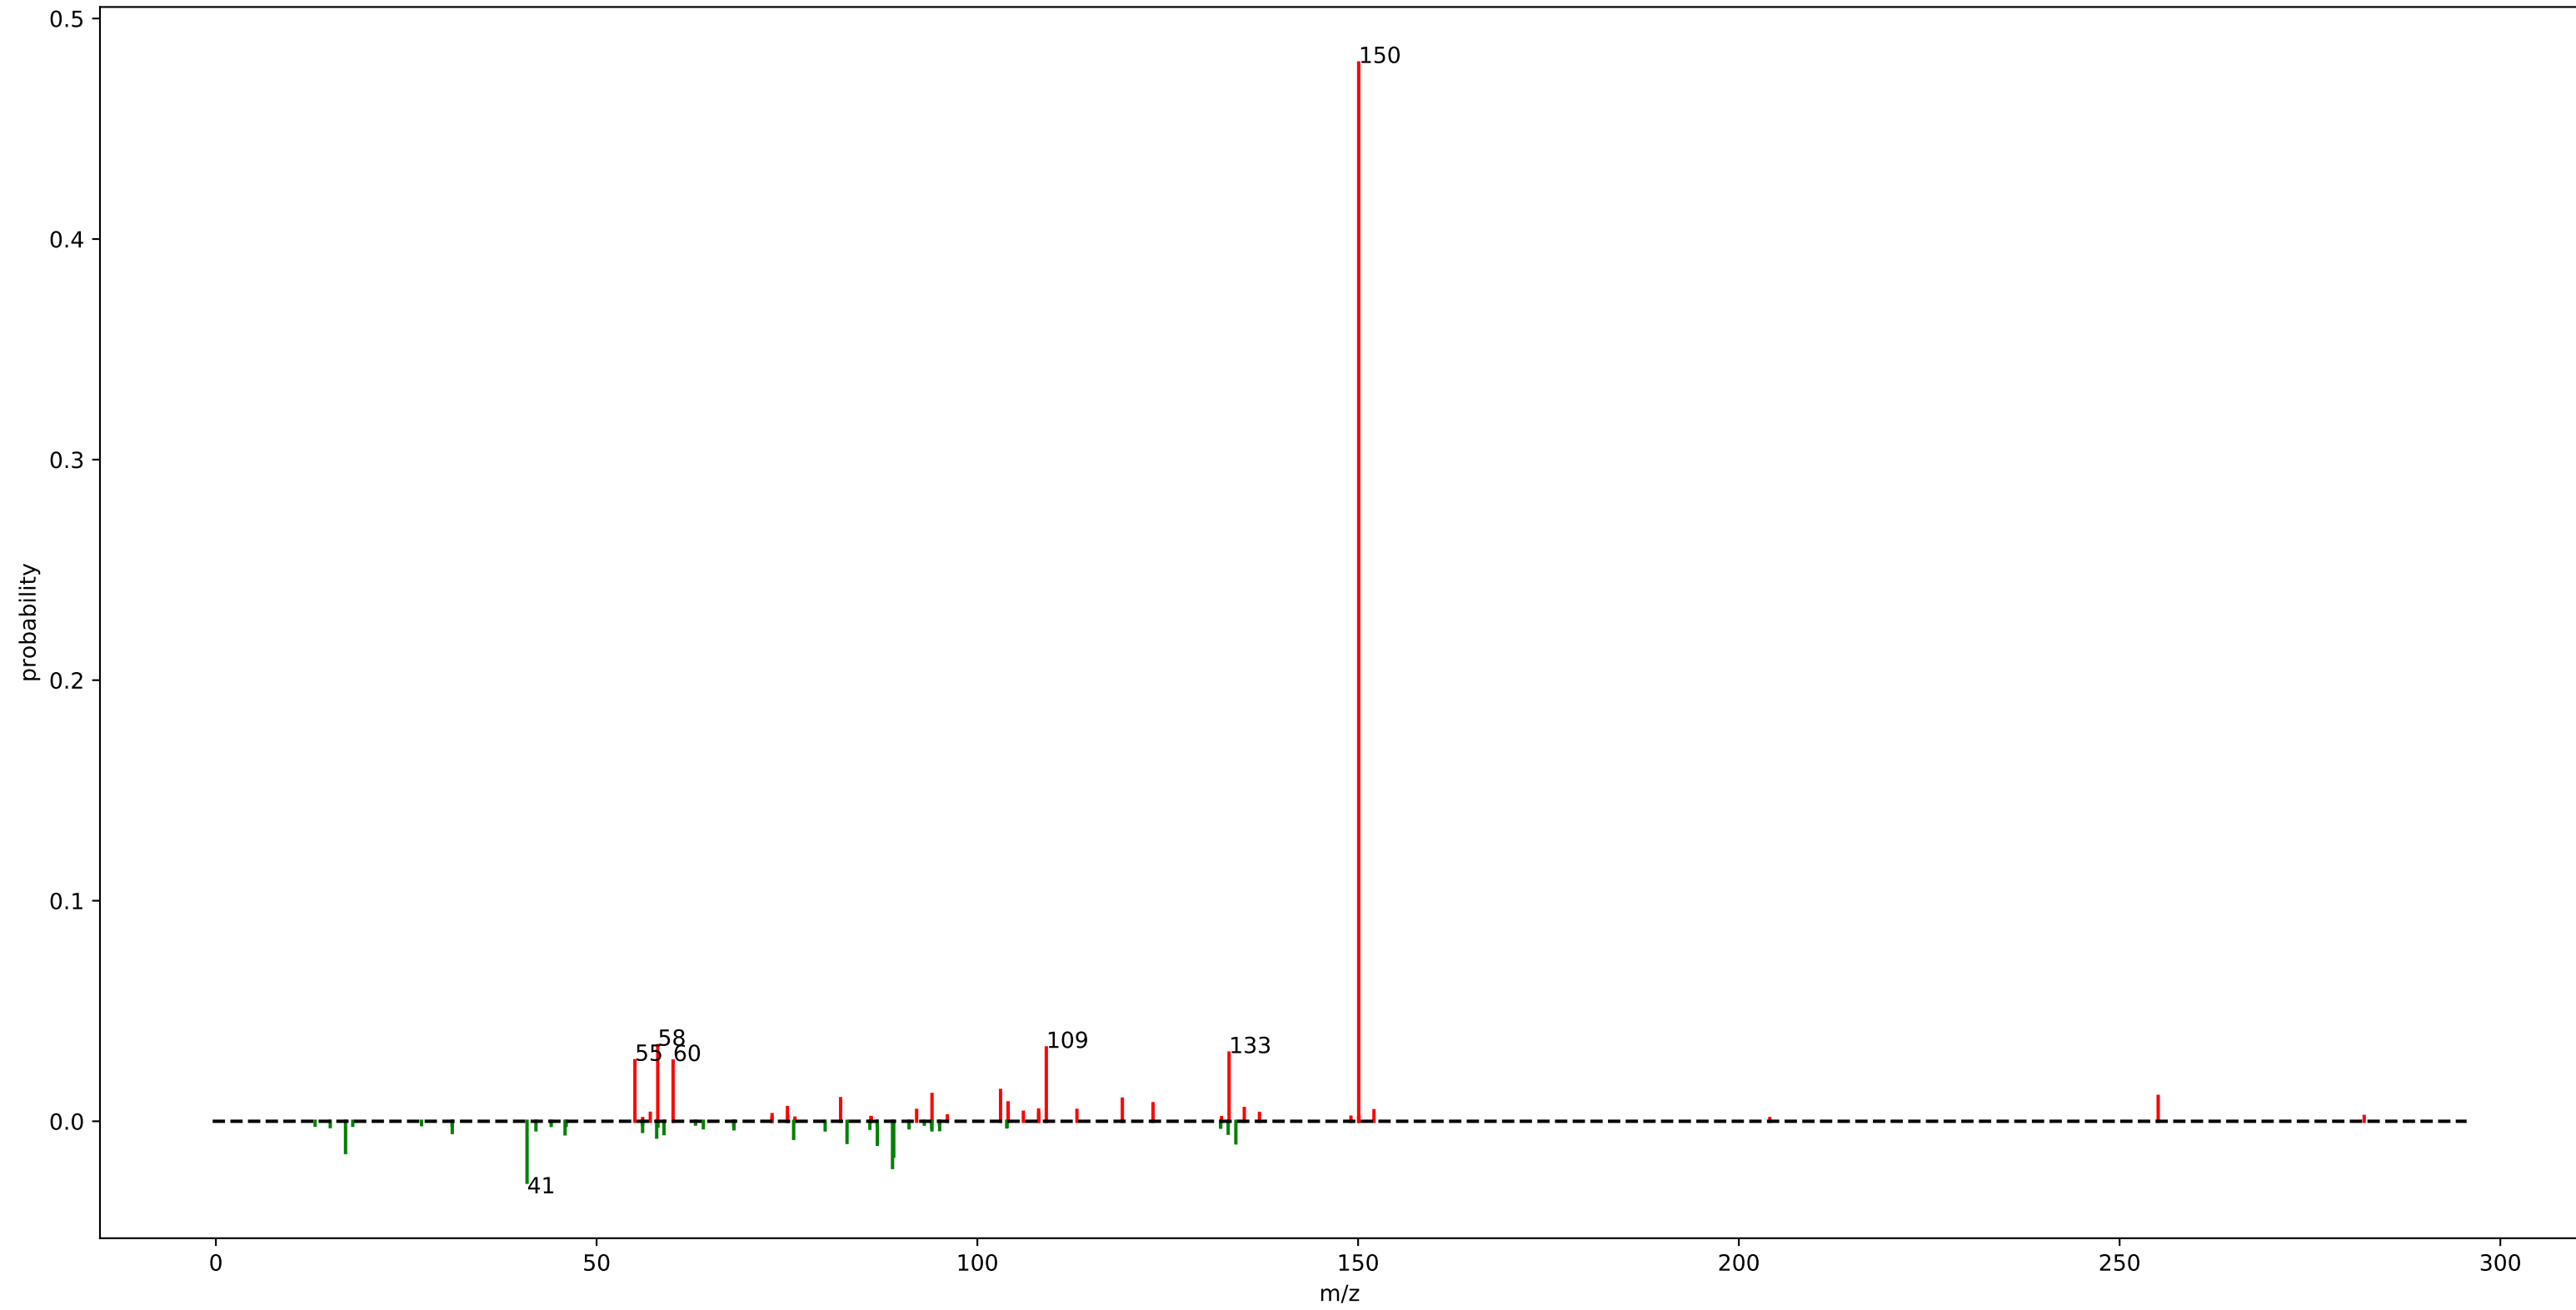

# urine\_mass2motif\_181.m2m

|                   |        |                   |        |
|-------------------|--------|-------------------|--------|
| fragment_150.0775 | : 0.48 | loss_75.8725      | : 0.01 |
| fragment_58.0275  | : 0.03 | loss_57.8875      | : 0.01 |
| fragment_109.0525 | : 0.03 | fragment_75.0575  | : 0.01 |
| fragment_133.0525 | : 0.03 | fragment_135.0525 | : 0.01 |
| loss_40.8625      | : 0.03 | loss_45.8525      | : 0.01 |
| fragment_55.0275  | : 0.03 | loss_58.8475      | : 0.01 |
| fragment_60.0425  | : 0.03 | loss_132.9375     | : 0.01 |
| loss_88.8575      | : 0.02 | fragment_108.0425 | : 0.01 |
| loss_89.0175      | : 0.02 | loss_31.0425      | : 0.01 |
| loss_17.0275      | : 0.01 |                   |        |
| fragment_103.0475 | : 0.01 |                   |        |
| fragment_94.0425  | : 0.01 |                   |        |
| fragment_255.0675 | : 0.01 |                   |        |
| loss_86.8675      | : 0.01 |                   |        |
| fragment_82.0425  | : 0.01 |                   |        |
| fragment_119.0375 | : 0.01 |                   |        |
| loss_133.9425     | : 0.01 |                   |        |
| loss_82.8825      | : 0.01 |                   |        |
| fragment_104.0325 | : 0.01 |                   |        |
| fragment_123.0675 | : 0.01 |                   |        |



motif\_460

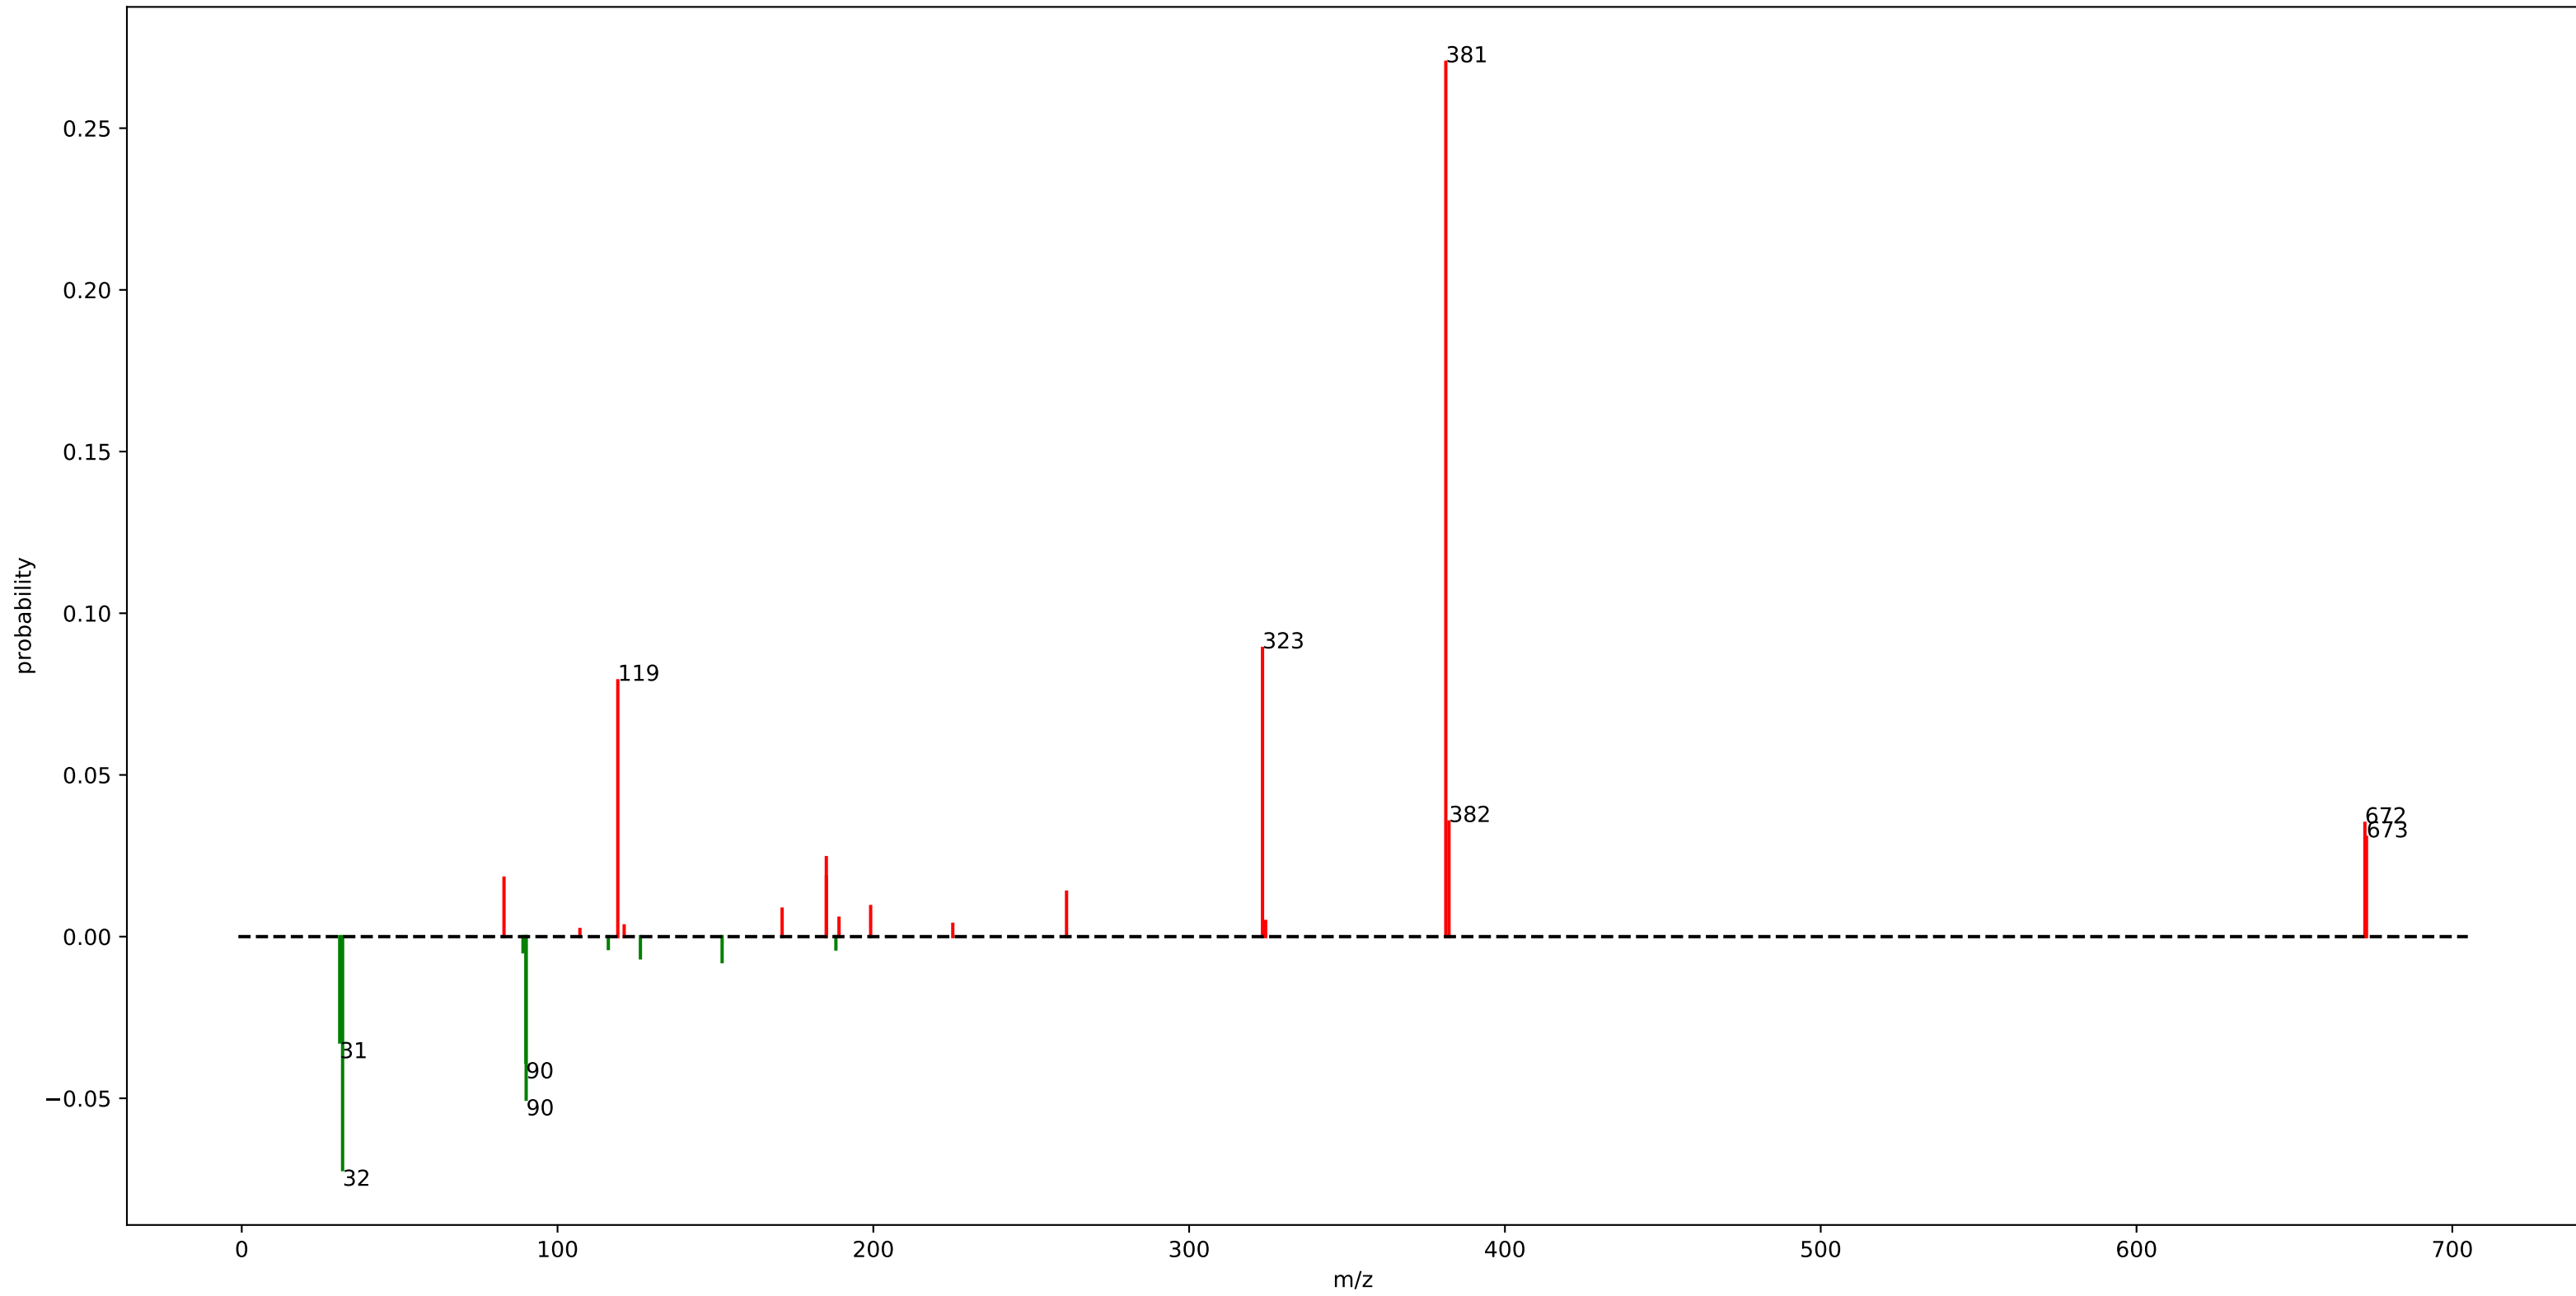

## motif\_460

|                   |        |
|-------------------|--------|
| fragment_381.2775 | : 0.27 |
| fragment_323.2375 | : 0.09 |
| fragment_119.0825 | : 0.08 |
| loss_31.9375      | : 0.07 |
| loss_90.0675      | : 0.05 |
| loss_89.9825      | : 0.04 |
| fragment_382.2825 | : 0.04 |
| fragment_672.3175 | : 0.04 |
| loss_31.0225      | : 0.03 |
| fragment_672.8175 | : 0.03 |
| fragment_185.1125 | : 0.02 |
| fragment_185.1325 | : 0.02 |
| fragment_83.0475  | : 0.02 |
| fragment_261.1825 | : 0.01 |
| fragment_199.1475 | : 0.01 |
| fragment_171.1175 | : 0.01 |
| loss_152.1175     | : 0.01 |
| loss_126.2425     | : 0.01 |
| fragment_189.1275 | : 0.01 |

euphorbia\_motif\_126.m2m

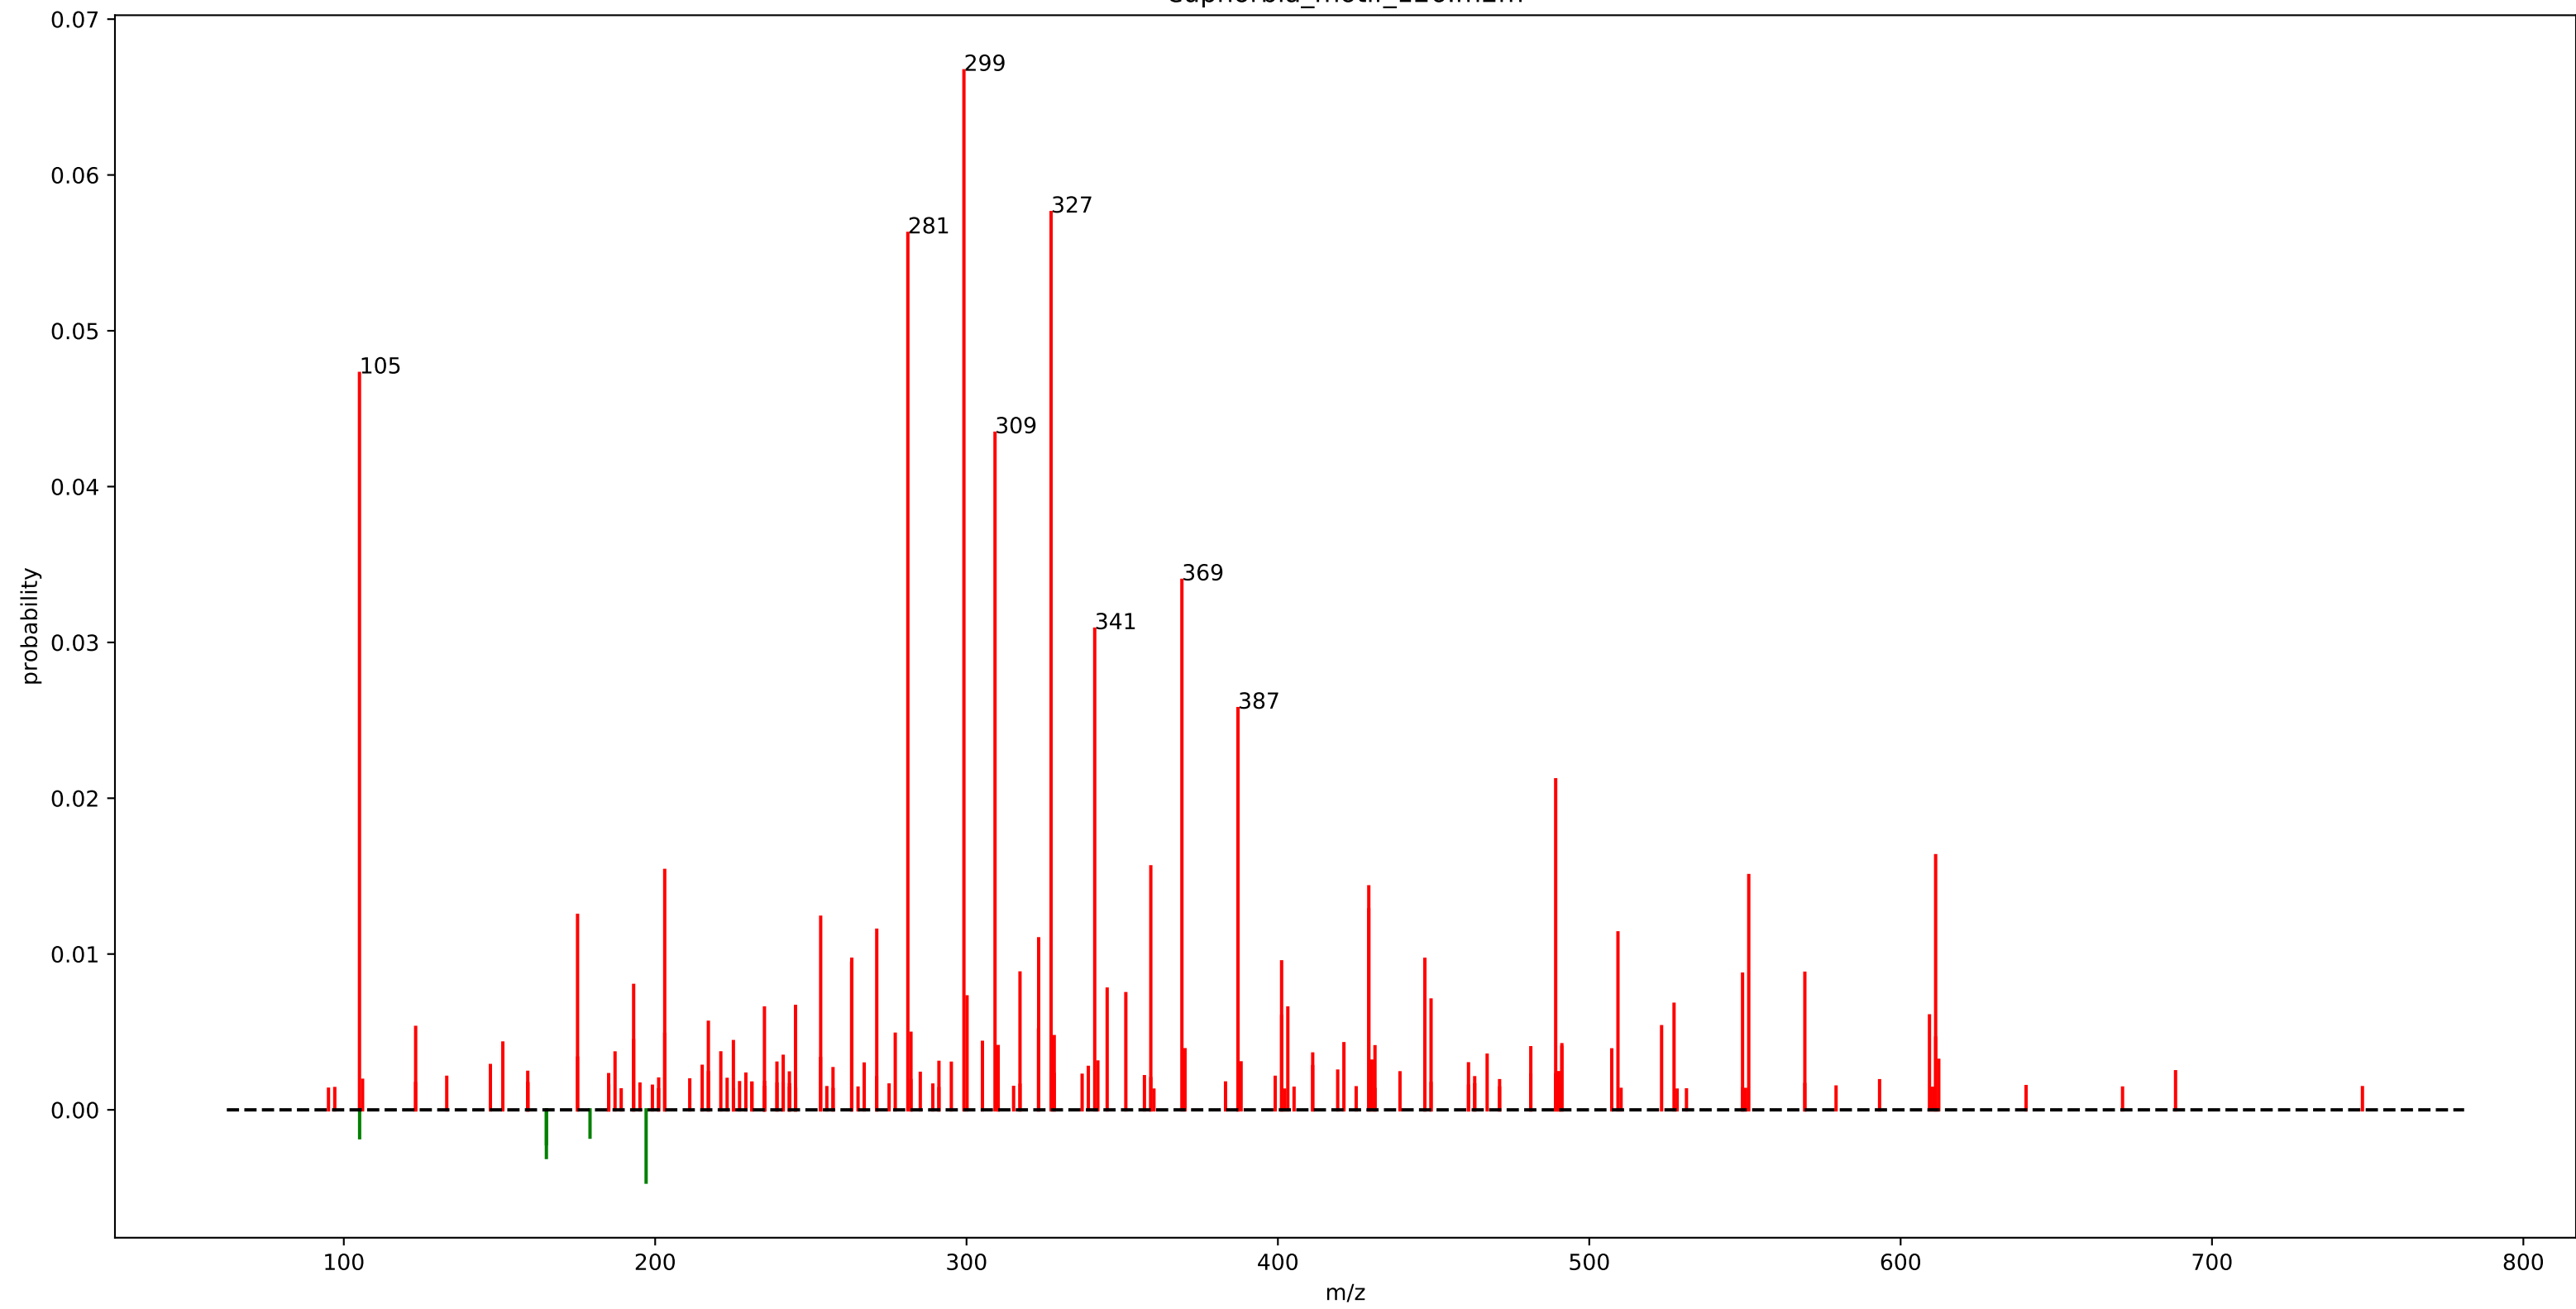

# euphorbia\_motif\_126.m2m

|                   |        |                   |        |                   |        |
|-------------------|--------|-------------------|--------|-------------------|--------|
| fragment_299.1625 | : 0.07 | fragment_263.1425 | : 0.01 | fragment_523.2325 | : 0.01 |
| fragment_327.1575 | : 0.06 | fragment_447.2025 | : 0.01 | fragment_123.0775 | : 0.01 |
| fragment_281.1525 | : 0.06 | fragment_401.1925 | : 0.01 | fragment_323.1125 | : 0.01 |
| fragment_105.0325 | : 0.05 | fragment_263.0925 | : 0.01 | fragment_245.0825 | : 0.01 |
| fragment_309.1475 | : 0.04 | fragment_317.1725 | : 0.01 |                   |        |
| fragment_369.1675 | : 0.03 | fragment_569.2375 | : 0.01 |                   |        |
| fragment_341.1725 | : 0.03 | fragment_549.2325 | : 0.01 |                   |        |
| fragment_387.1775 | : 0.03 | fragment_193.0875 | : 0.01 |                   |        |
| fragment_489.2125 | : 0.02 | fragment_345.1675 | : 0.01 |                   |        |
| fragment_611.2475 | : 0.02 | fragment_351.1575 | : 0.01 |                   |        |
| fragment_359.1825 | : 0.02 | fragment_300.1675 | : 0.01 |                   |        |
| fragment_203.0675 | : 0.02 | fragment_449.1925 | : 0.01 |                   |        |
| fragment_551.2275 | : 0.02 | fragment_527.2275 | : 0.01 |                   |        |
| fragment_429.1925 | : 0.01 | fragment_245.0775 | : 0.01 |                   |        |
| fragment_429.1875 | : 0.01 | fragment_235.0975 | : 0.01 |                   |        |
| fragment_175.0725 | : 0.01 | fragment_403.1875 | : 0.01 |                   |        |
| fragment_253.1575 | : 0.01 | fragment_609.2675 | : 0.01 |                   |        |
| fragment_271.1675 | : 0.01 | fragment_401.1975 | : 0.01 |                   |        |
| fragment_509.2175 | : 0.01 | fragment_217.0875 | : 0.01 |                   |        |
| fragment_323.1625 | : 0.01 | fragment_387.1825 | : 0.01 |                   |        |

gnps\_motif\_47.m2m

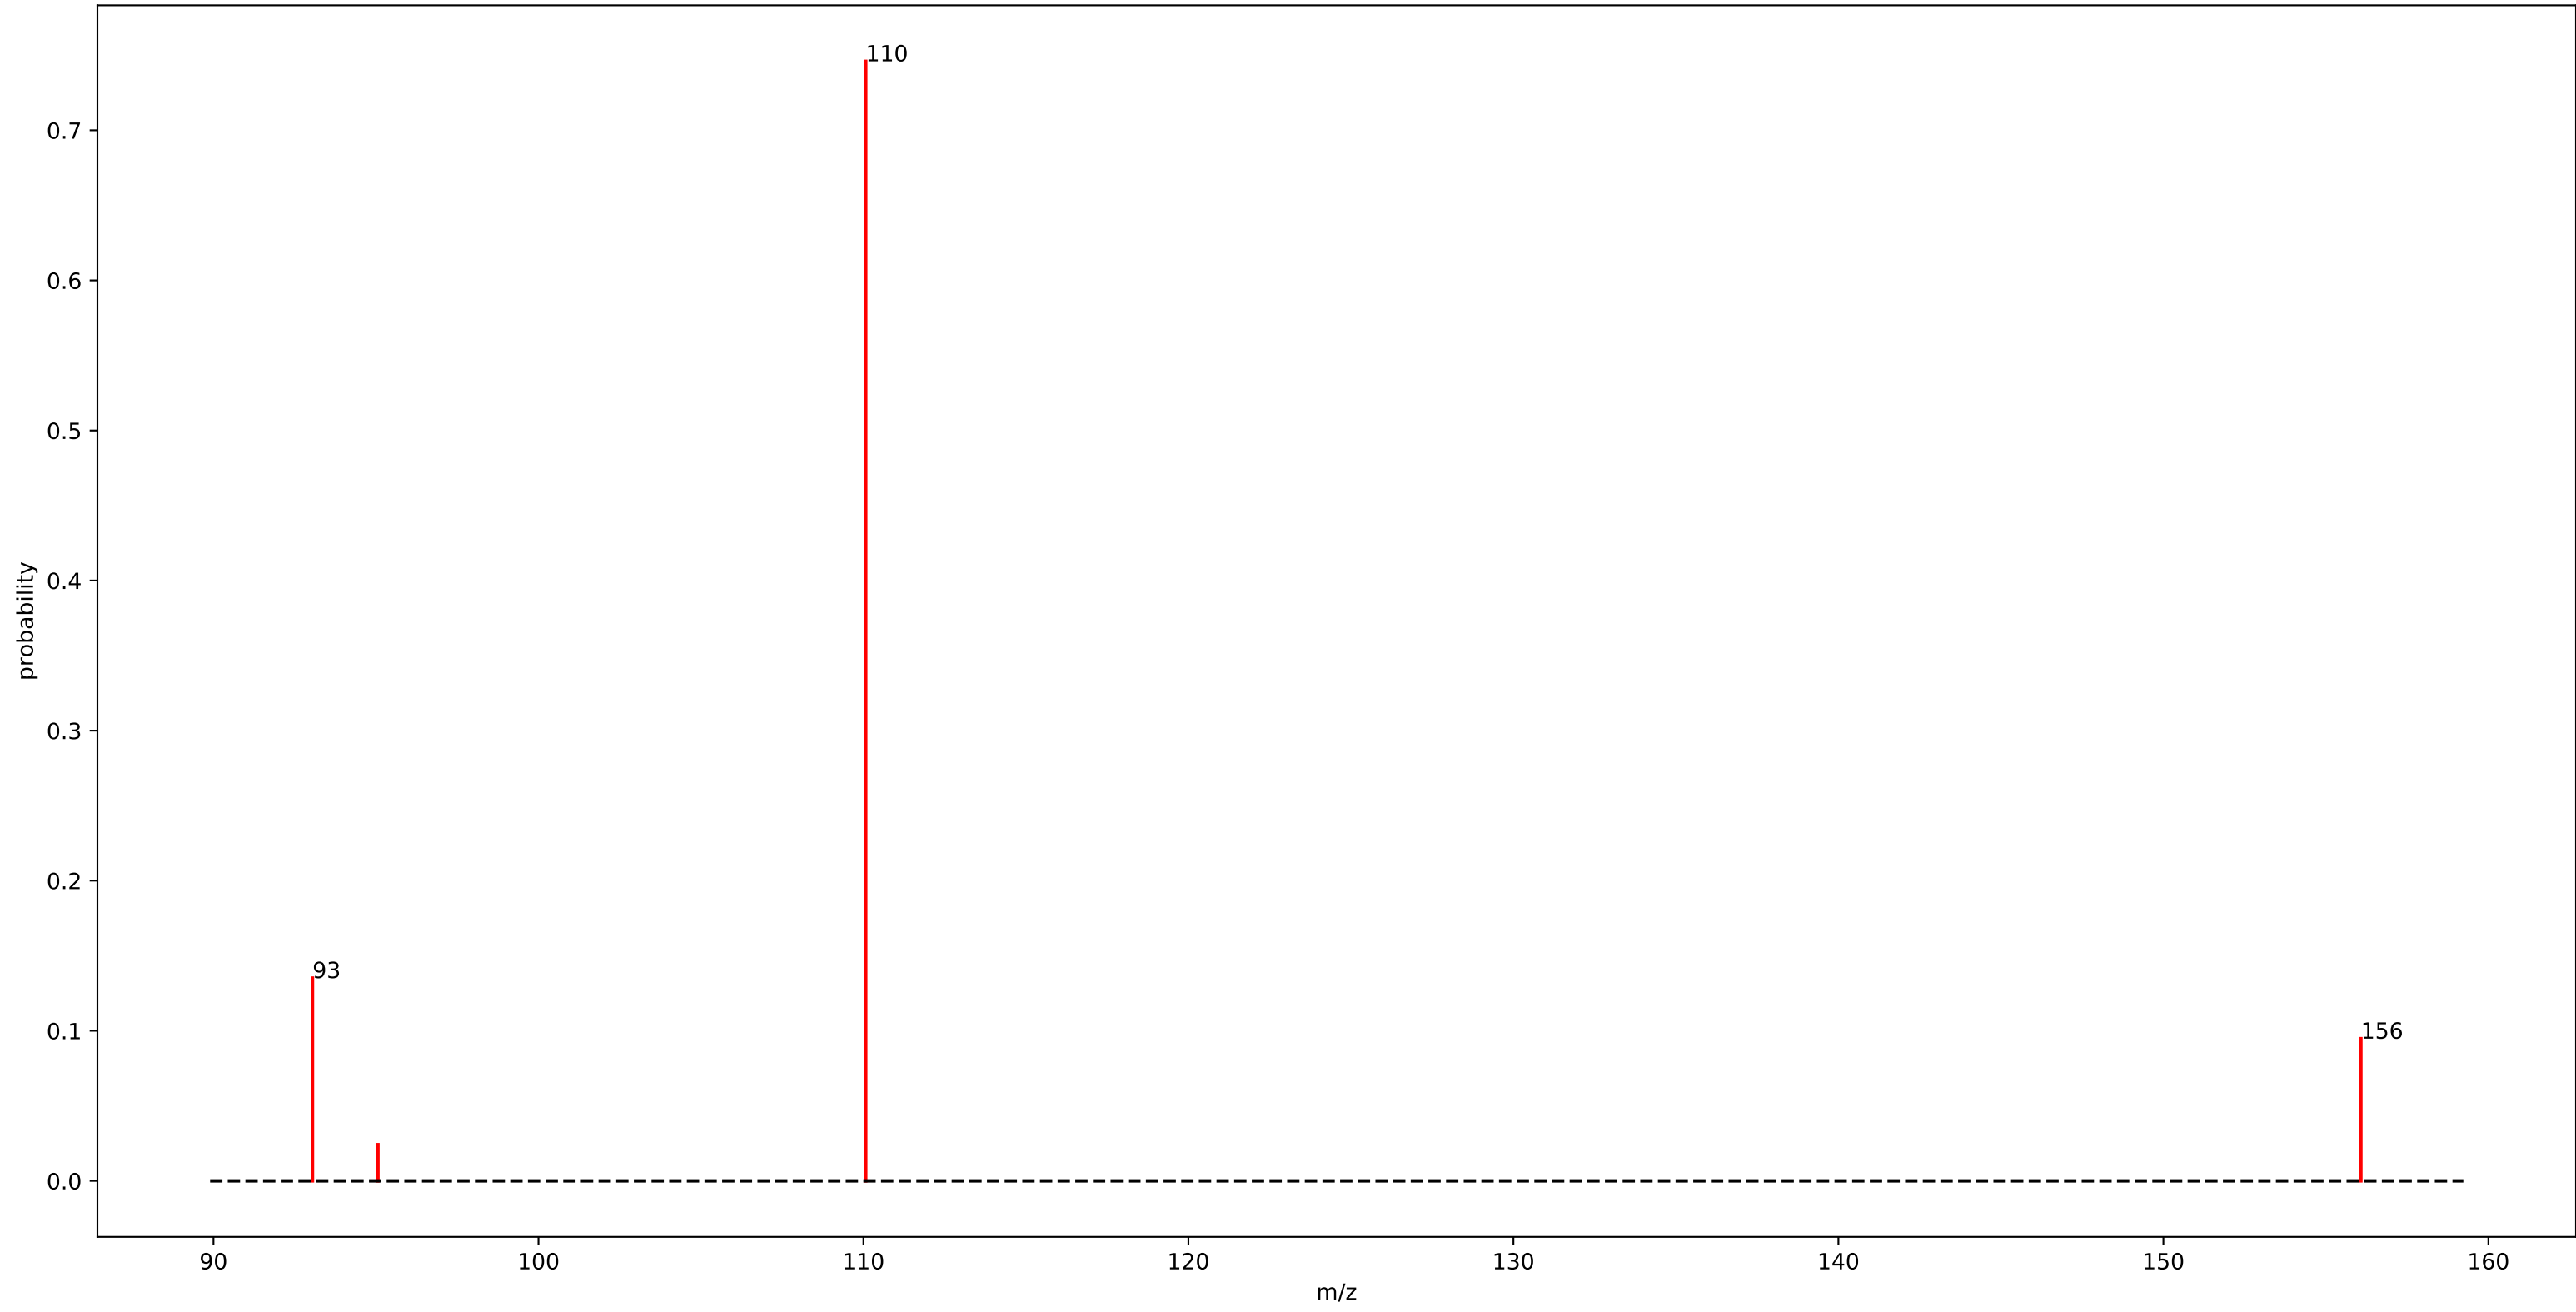

## gnps\_motif\_47.m2m

|                   |        |
|-------------------|--------|
| fragment_110.0725 | : 0.75 |
| fragment_93.0475  | : 0.14 |
| fragment_156.0775 | : 0.09 |
| fragment_95.0625  | : 0.02 |

motif\_465

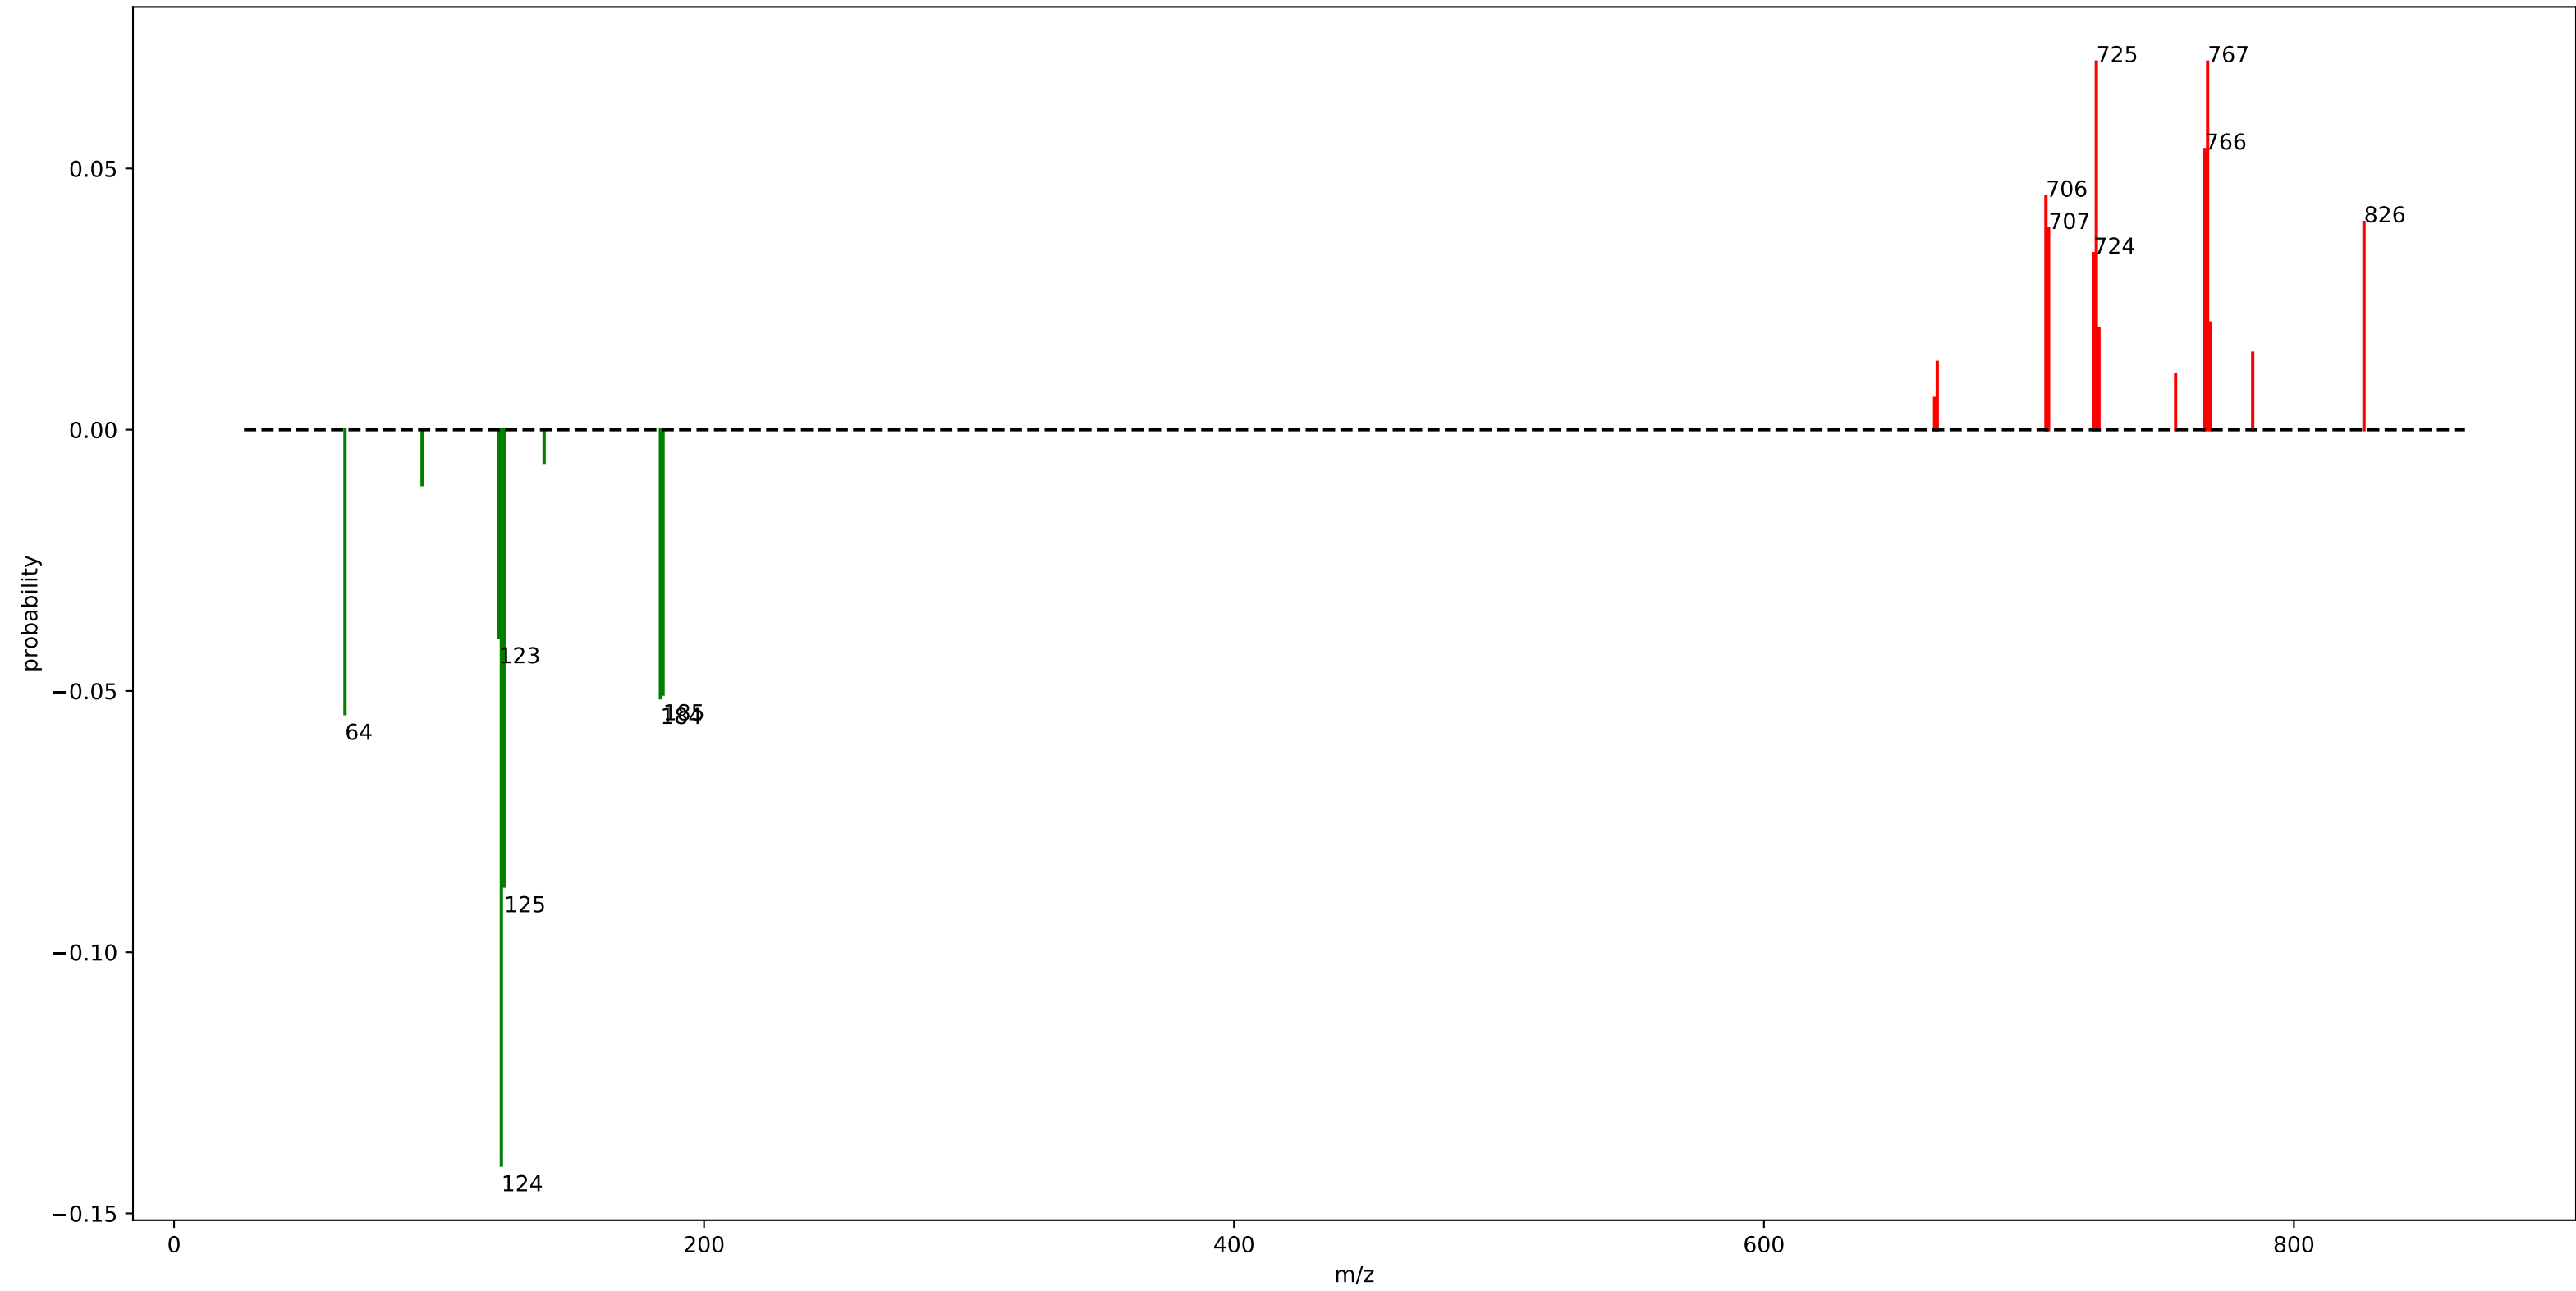

## motif\_465

|                   |        |                   |        |
|-------------------|--------|-------------------|--------|
| loss_123.5125     | : 0.14 | fragment_664.3875 | : 0.01 |
| loss_124.5175     | : 0.09 |                   |        |
| fragment_767.4275 | : 0.07 |                   |        |
| fragment_725.4125 | : 0.07 |                   |        |
| loss_64.4925      | : 0.05 |                   |        |
| fragment_766.4225 | : 0.05 |                   |        |
| loss_183.5325     | : 0.05 |                   |        |
| loss_184.5375     | : 0.05 |                   |        |
| fragment_706.4025 | : 0.04 |                   |        |
| fragment_826.4425 | : 0.04 |                   |        |
| loss_122.5075     | : 0.04 |                   |        |
| fragment_707.4075 | : 0.04 |                   |        |
| fragment_724.4125 | : 0.03 |                   |        |
| fragment_768.4275 | : 0.02 |                   |        |
| fragment_726.4175 | : 0.02 |                   |        |
| fragment_784.4325 | : 0.01 |                   |        |
| fragment_665.3925 | : 0.01 |                   |        |
| loss_93.5825      | : 0.01 |                   |        |
| fragment_755.3475 | : 0.01 |                   |        |
| loss_139.6375     | : 0.01 |                   |        |



urine\_mass2motif\_153.m2m

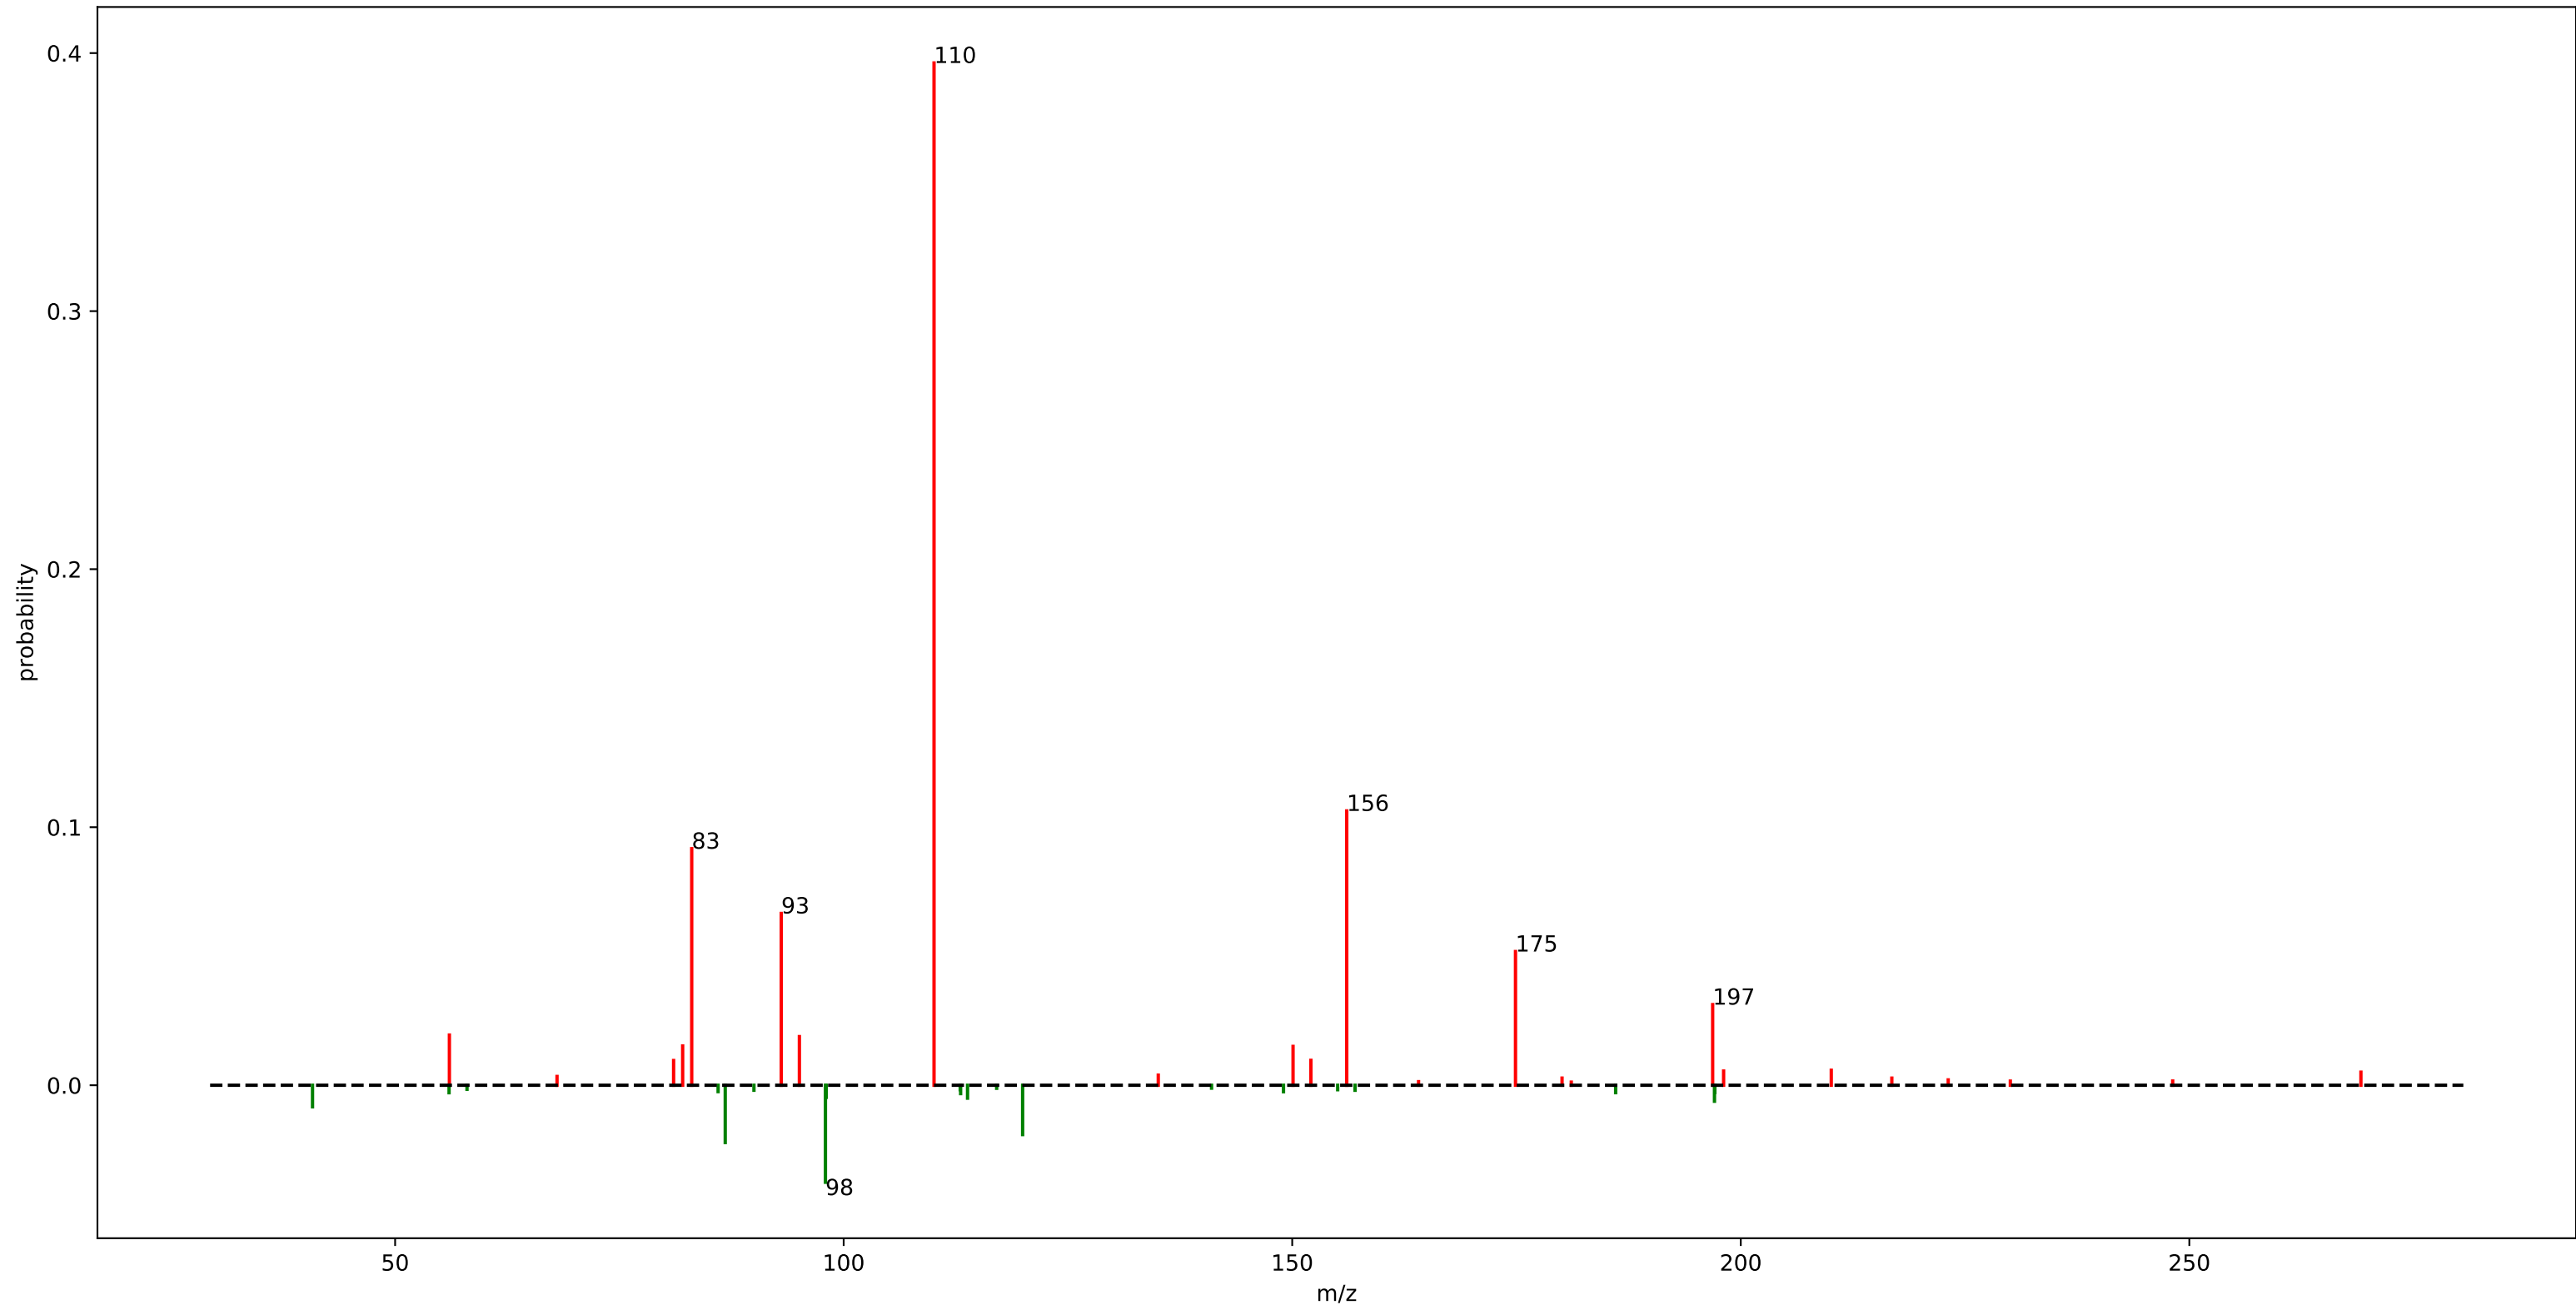

## urine\_mass2motif\_153.m2m

|                   |        |               |        |
|-------------------|--------|---------------|--------|
| fragment_110.0725 | : 0.40 | loss_113.8075 | : 0.01 |
| fragment_156.0775 | : 0.11 |               |        |
| fragment_83.0625  | : 0.09 |               |        |
| fragment_93.0425  | : 0.07 |               |        |
| fragment_174.8875 | : 0.05 |               |        |
| loss_97.9675      | : 0.04 |               |        |
| fragment_196.8675 | : 0.03 |               |        |
| loss_86.7975      | : 0.02 |               |        |
| fragment_56.0475  | : 0.02 |               |        |
| loss_119.9475     | : 0.02 |               |        |
| fragment_95.0625  | : 0.02 |               |        |
| fragment_82.0525  | : 0.02 |               |        |
| fragment_150.0925 | : 0.02 |               |        |
| fragment_152.0825 | : 0.01 |               |        |
| fragment_81.0425  | : 0.01 |               |        |
| loss_40.7925      | : 0.01 |               |        |
| loss_197.0675     | : 0.01 |               |        |
| fragment_210.0875 | : 0.01 |               |        |
| fragment_198.0875 | : 0.01 |               |        |
| fragment_269.1275 | : 0.01 |               |        |

euphorbia\_motif\_44.m2m

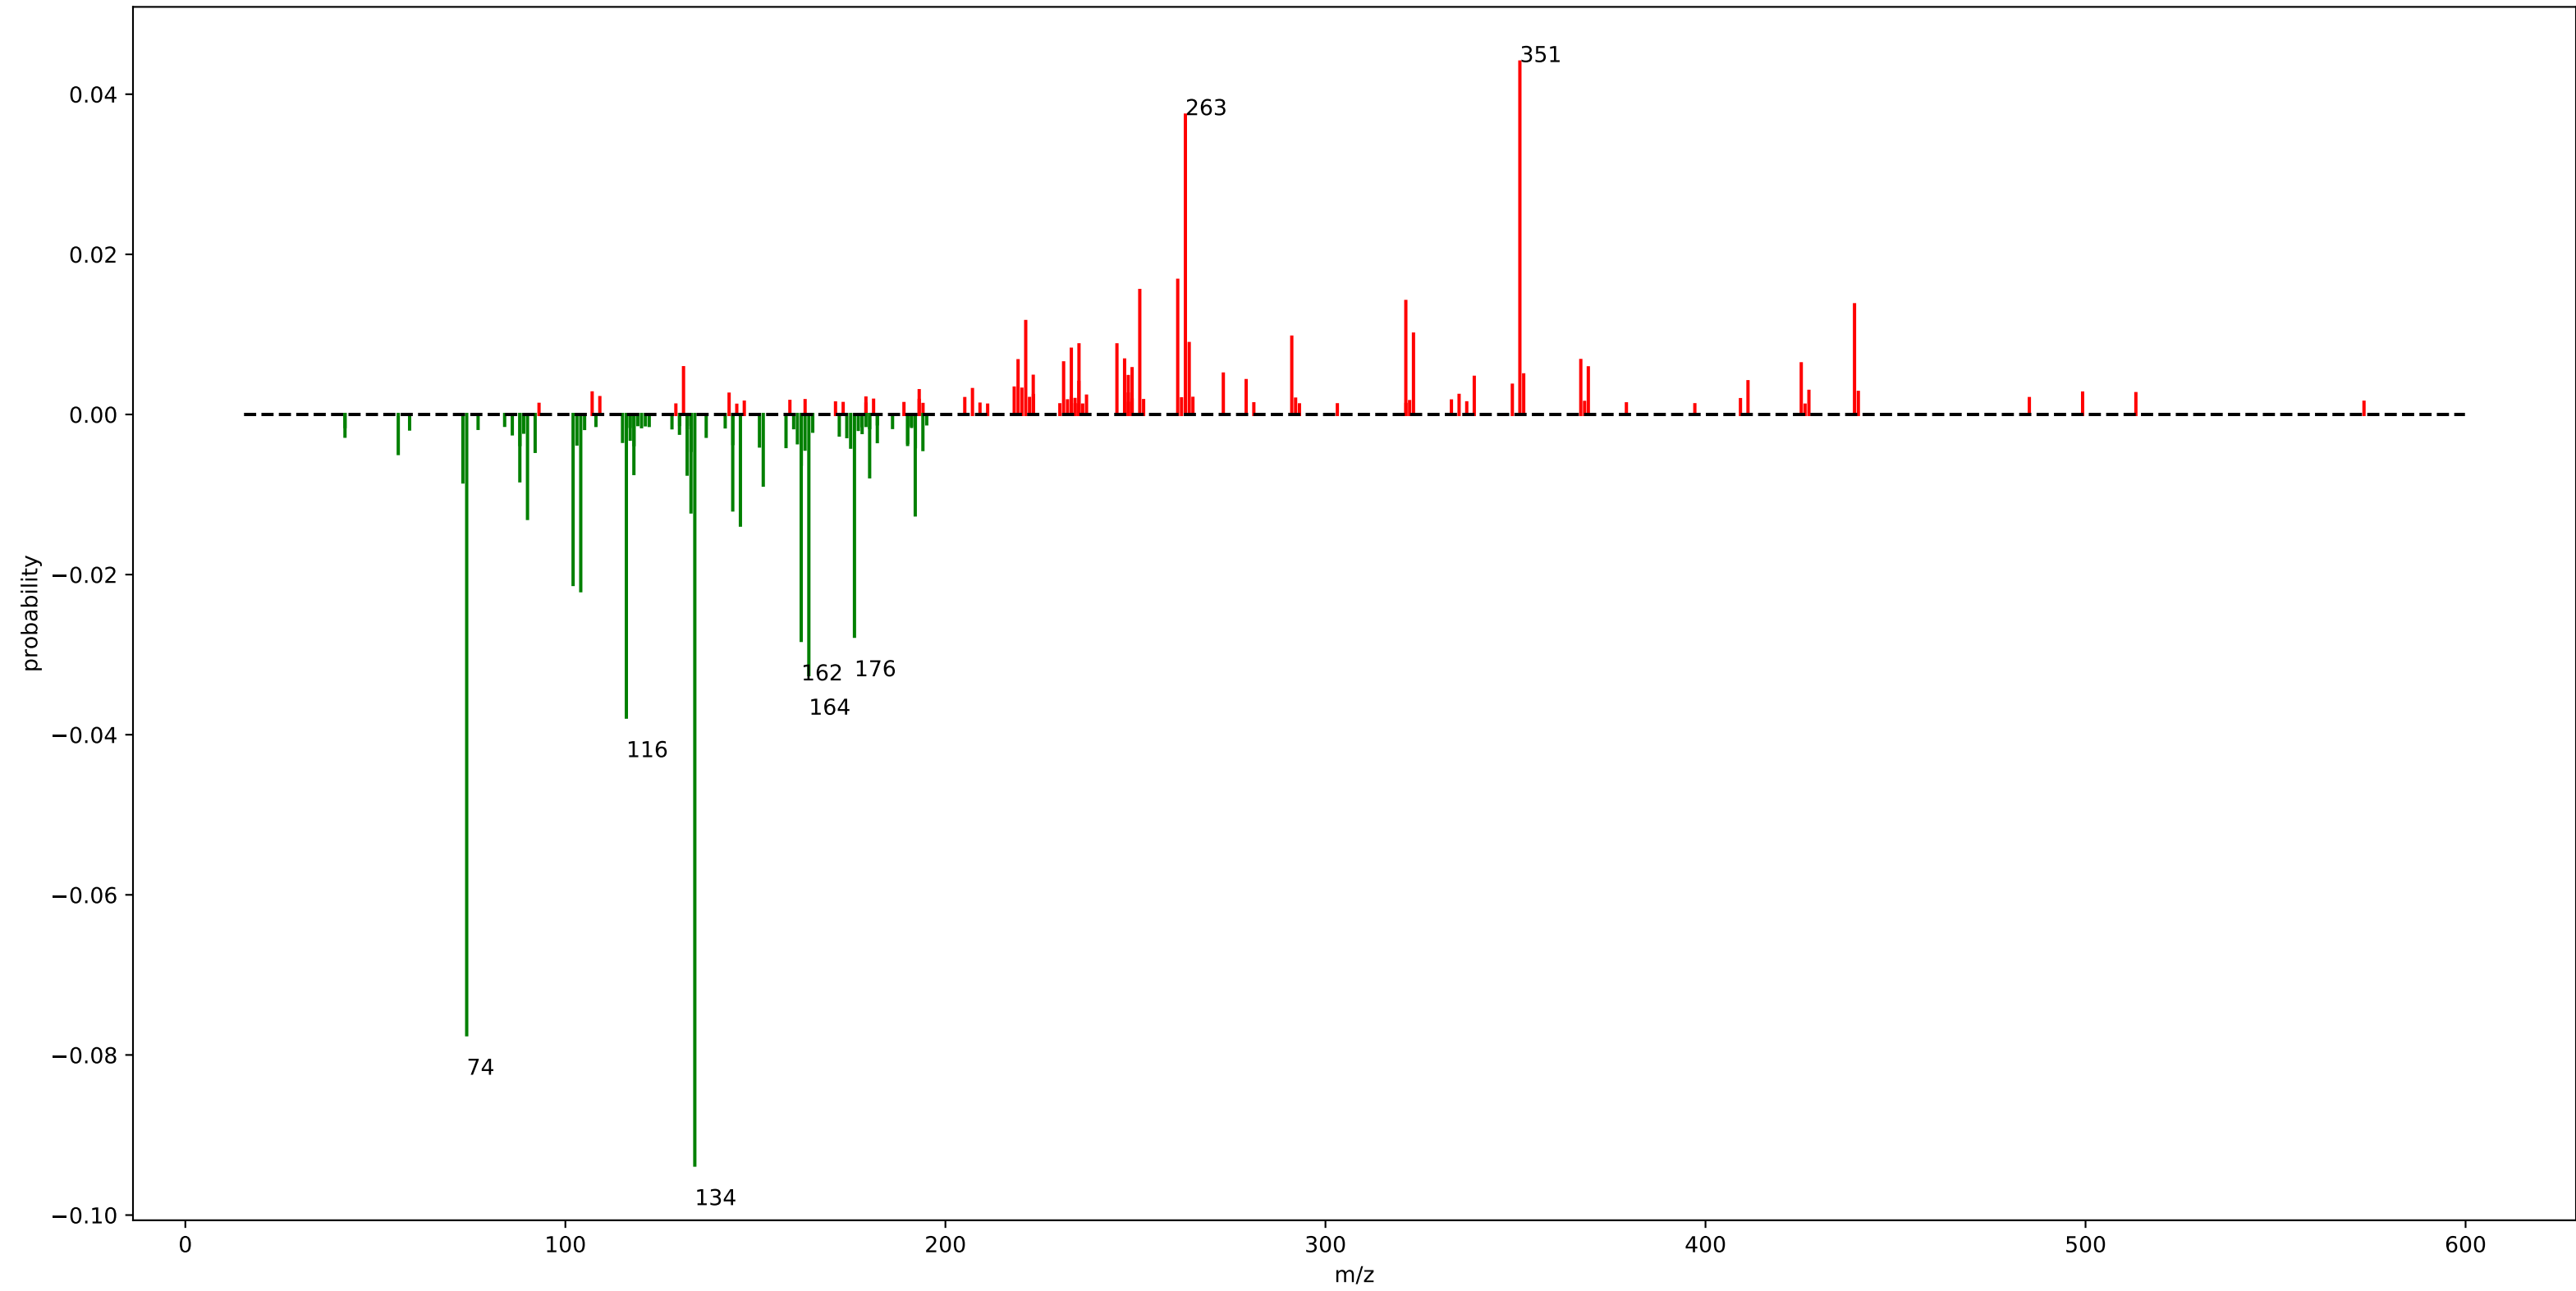

## euphorbia\_motif\_44.m2m

|                   |        |                   |        |                   |        |
|-------------------|--------|-------------------|--------|-------------------|--------|
| loss_134.0575     | : 0.09 | fragment_323.1625 | : 0.01 | fragment_249.1225 | : 0.01 |
| loss_74.0375      | : 0.08 | fragment_291.1375 | : 0.01 | fragment_273.1275 | : 0.01 |
| fragment_351.1575 | : 0.04 | fragment_264.1475 | : 0.01 |                   |        |
| loss_116.0475     | : 0.04 | loss_152.0675     | : 0.01 |                   |        |
| fragment_263.1425 | : 0.04 | fragment_235.1475 | : 0.01 |                   |        |
| loss_164.0675     | : 0.03 | fragment_245.1325 | : 0.01 |                   |        |
| loss_162.0525     | : 0.03 | loss_73.0325      | : 0.01 |                   |        |
| loss_176.0675     | : 0.03 | loss_88.0175      | : 0.01 |                   |        |
| loss_104.0475     | : 0.02 | fragment_233.1325 | : 0.01 |                   |        |
| loss_102.0325     | : 0.02 | loss_180.0625     | : 0.01 |                   |        |
| fragment_261.1275 | : 0.02 | loss_132.0425     | : 0.01 |                   |        |
| fragment_251.1425 | : 0.02 | loss_118.0275     | : 0.01 |                   |        |
| fragment_321.1475 | : 0.01 | fragment_247.1475 | : 0.01 |                   |        |
| loss_146.0575     | : 0.01 | fragment_367.1875 | : 0.01 |                   |        |
| fragment_439.2125 | : 0.01 | fragment_219.1175 | : 0.01 |                   |        |
| loss_90.0325      | : 0.01 | fragment_231.1025 | : 0.01 |                   |        |
| loss_192.0625     | : 0.01 | fragment_425.1975 | : 0.01 |                   |        |
| loss_133.0525     | : 0.01 | loss_162.0875     | : 0.01 |                   |        |
| loss_144.0425     | : 0.01 | fragment_131.0875 | : 0.01 |                   |        |
| fragment_221.1325 | : 0.01 | fragment_369.1675 | : 0.01 |                   |        |

motif\_467

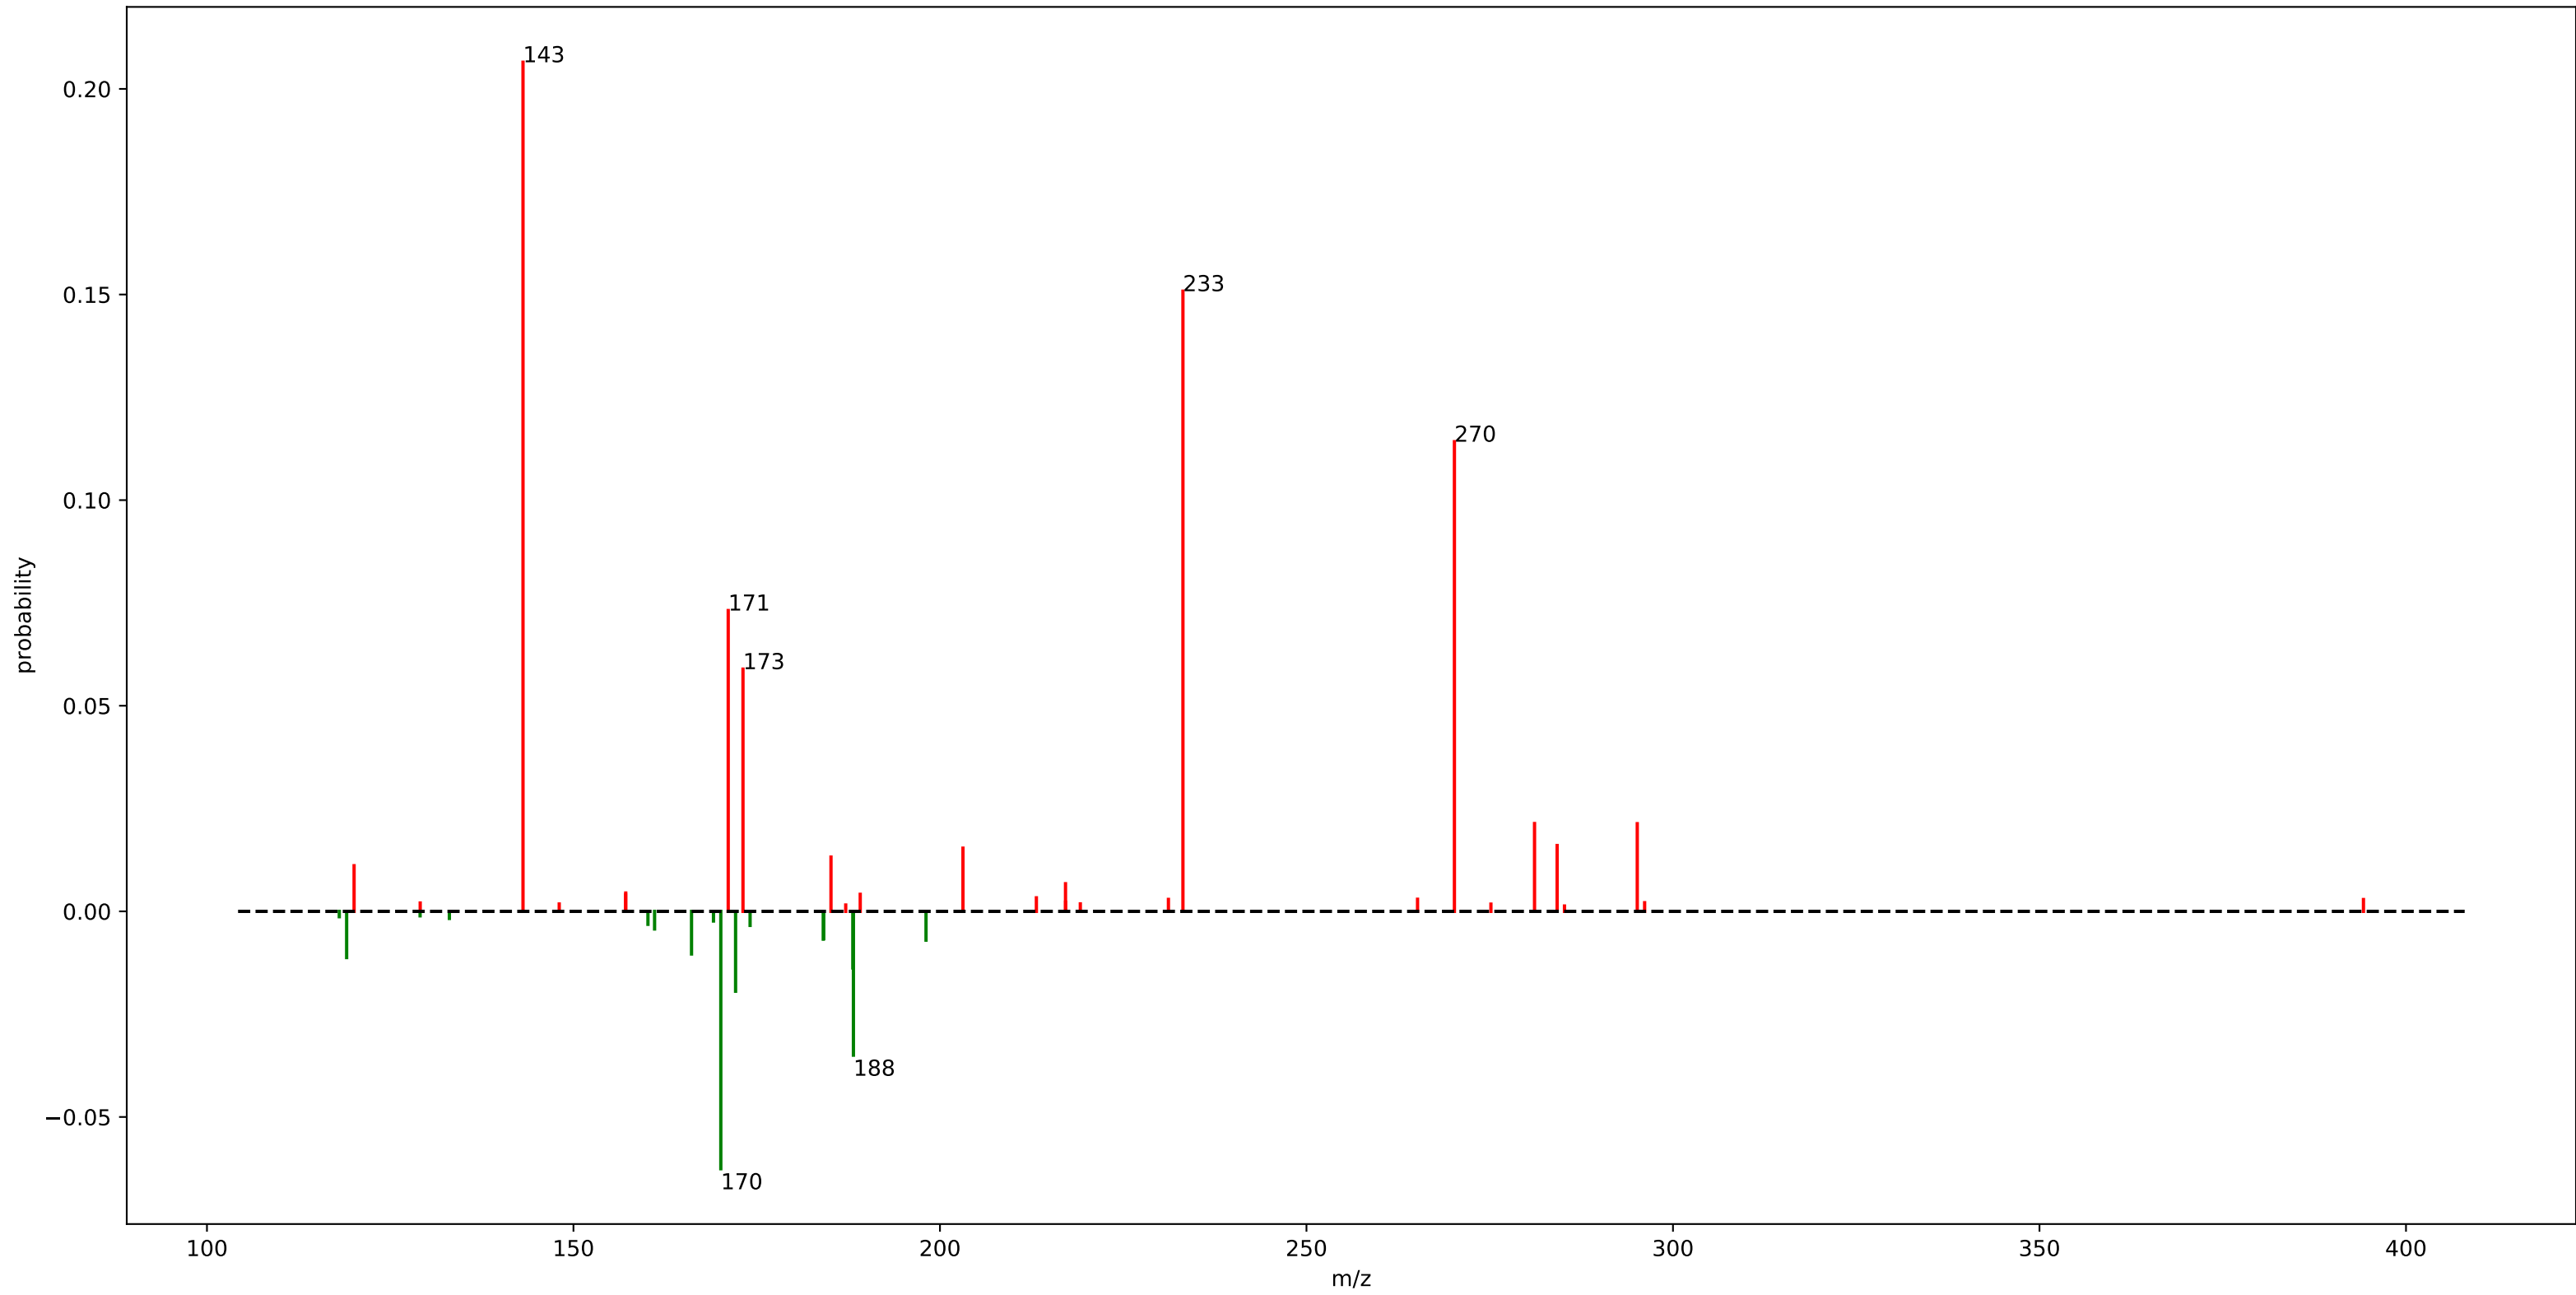

## motif\_467

|                   |        |               |        |
|-------------------|--------|---------------|--------|
| fragment_143.1175 | : 0.21 | loss_184.1375 | : 0.01 |
| fragment_233.1475 | : 0.15 |               |        |
| fragment_270.1825 | : 0.11 |               |        |
| fragment_171.1125 | : 0.07 |               |        |
| loss_170.1025     | : 0.06 |               |        |
| fragment_173.1275 | : 0.06 |               |        |
| loss_188.1925     | : 0.03 |               |        |
| fragment_281.1125 | : 0.02 |               |        |
| fragment_295.1275 | : 0.02 |               |        |
| loss_172.1175     | : 0.02 |               |        |
| fragment_284.1975 | : 0.02 |               |        |
| fragment_203.1375 | : 0.02 |               |        |
| loss_188.1125     | : 0.01 |               |        |
| fragment_185.1325 | : 0.01 |               |        |
| loss_119.0575     | : 0.01 |               |        |
| fragment_120.0725 | : 0.01 |               |        |
| loss_166.1075     | : 0.01 |               |        |
| loss_198.0975     | : 0.01 |               |        |
| loss_184.0825     | : 0.01 |               |        |
| fragment_217.1275 | : 0.01 |               |        |

motif\_678

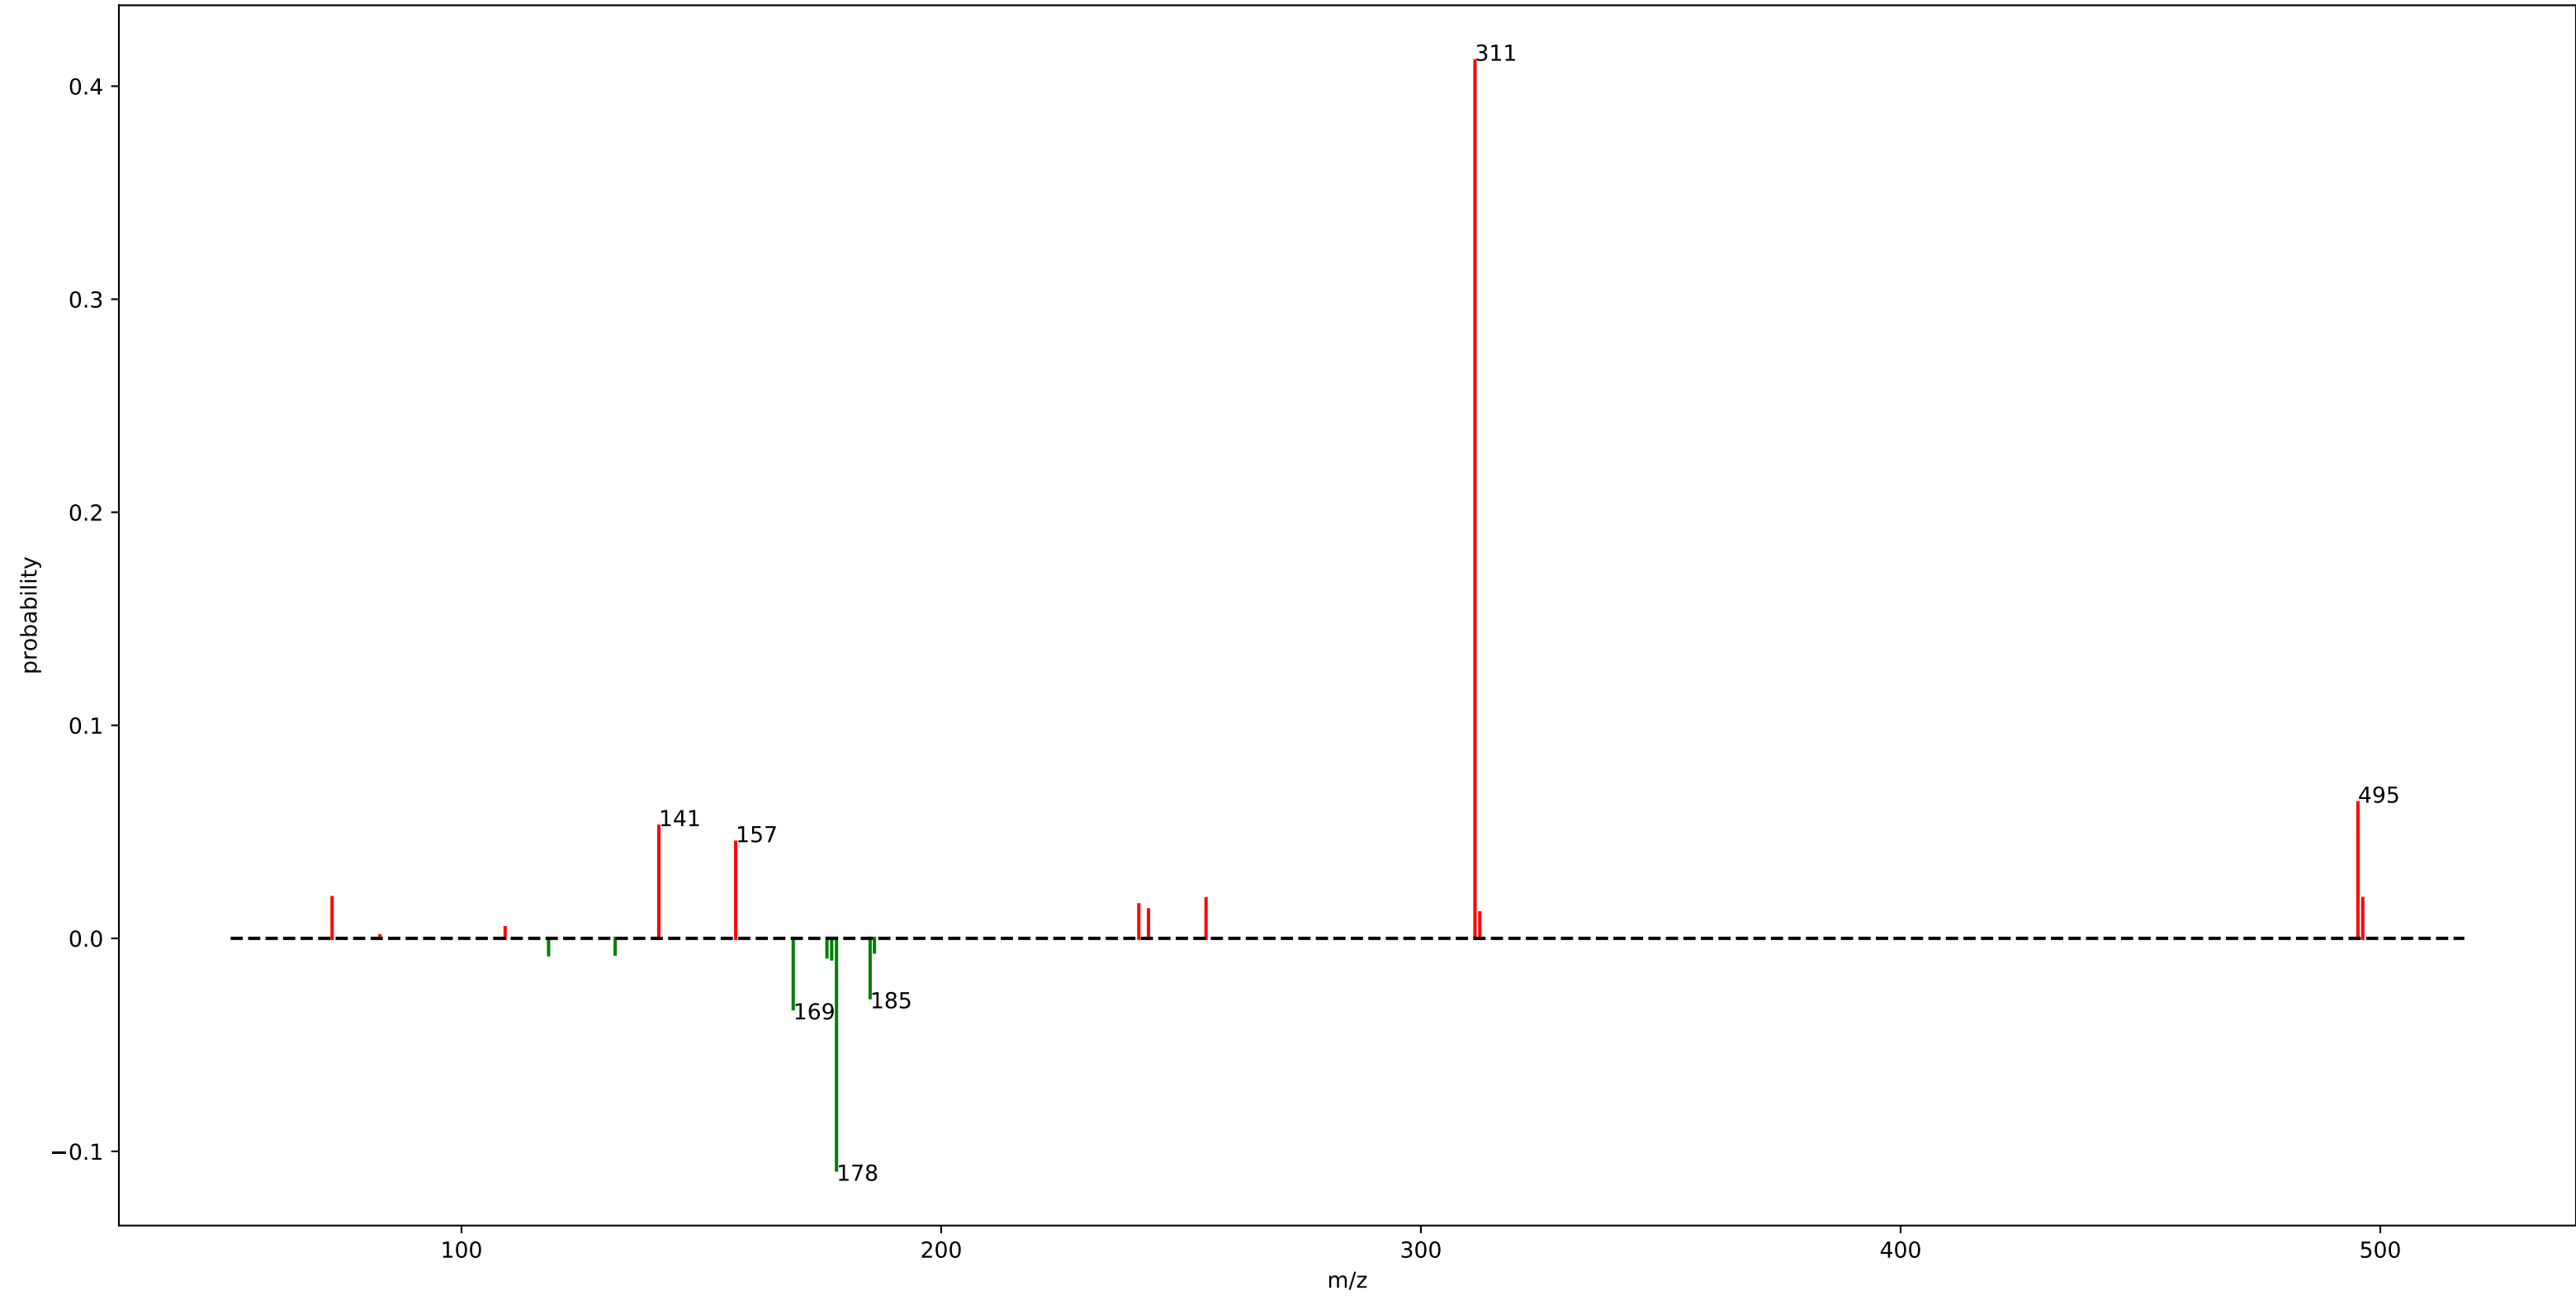

## motif\_678

|                   |        |
|-------------------|--------|
| fragment_311.2725 | : 0.41 |
| loss_178.1775     | : 0.11 |
| fragment_495.3425 | : 0.06 |
| fragment_141.1375 | : 0.05 |
| fragment_157.1675 | : 0.05 |
| loss_169.1575     | : 0.03 |
| loss_185.1875     | : 0.03 |
| fragment_73.0275  | : 0.02 |
| fragment_496.3475 | : 0.02 |
| fragment_255.2125 | : 0.02 |
| fragment_241.1975 | : 0.02 |
| fragment_243.2125 | : 0.01 |
| fragment_312.2775 | : 0.01 |
| loss_177.1775     | : 0.01 |
| loss_176.1825     | : 0.01 |
| loss_118.1575     | : 0.01 |
| loss_132.0325     | : 0.01 |
| loss_186.0825     | : 0.01 |



motif\_576

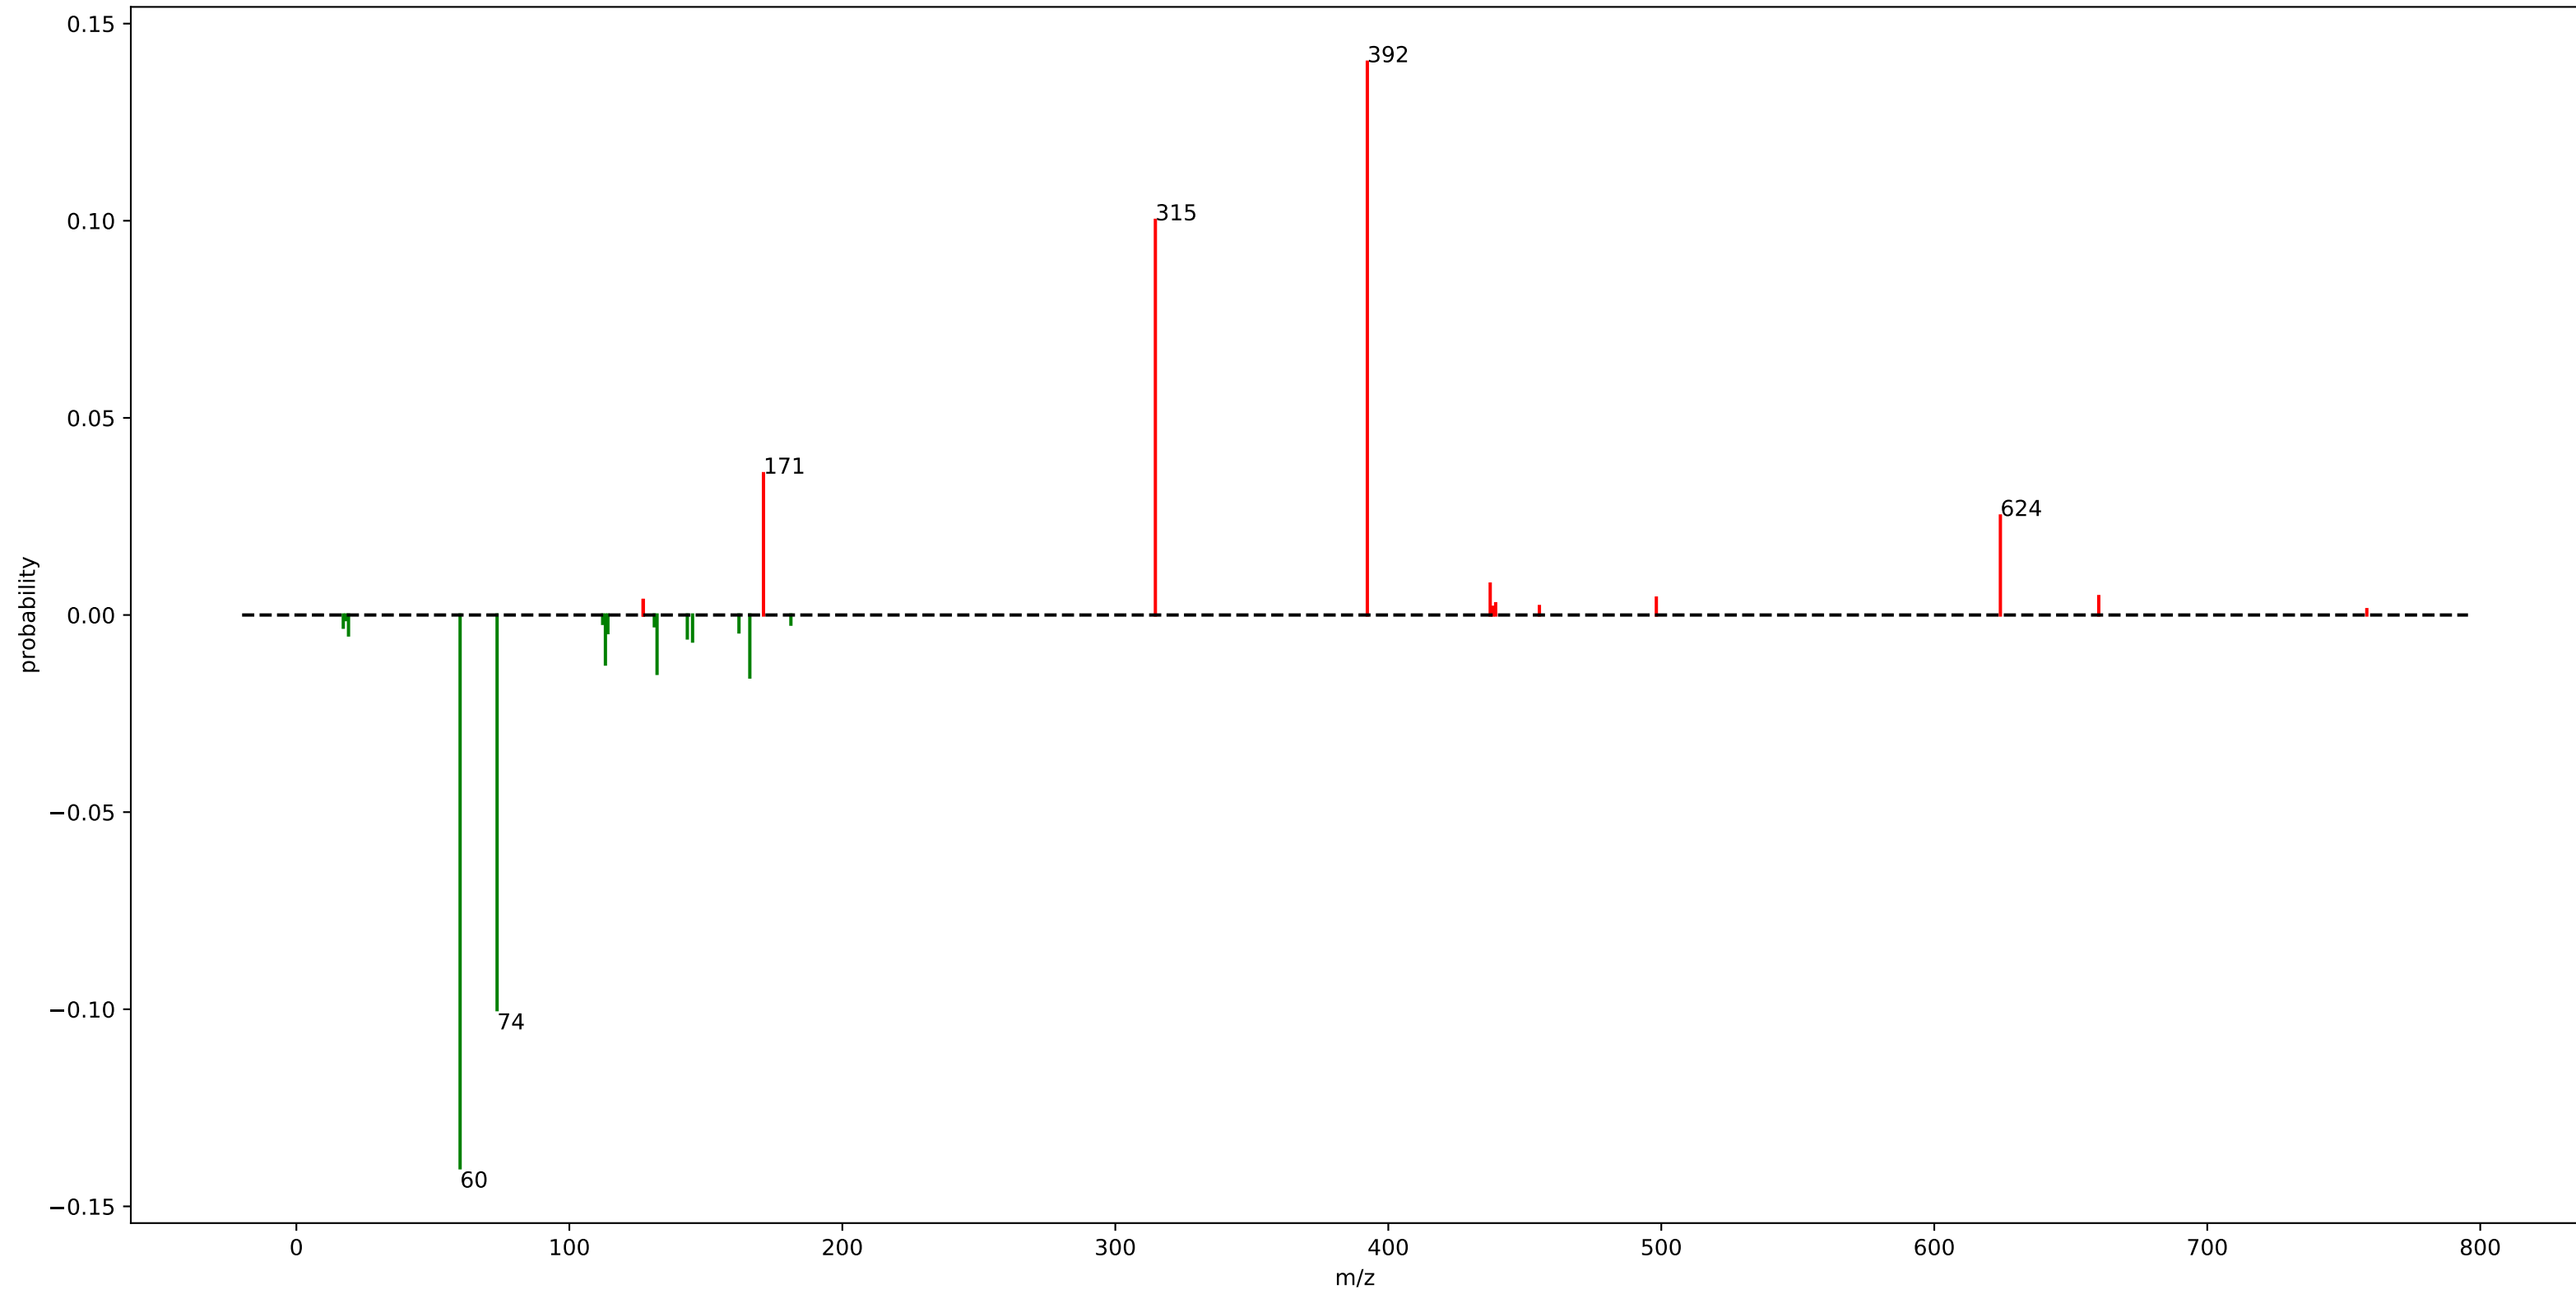

## motif\_576

|                   |        |
|-------------------|--------|
| loss_59.9825      | : 0.14 |
| fragment_392.3175 | : 0.14 |
| fragment_314.6725 | : 0.10 |
| loss_73.5325      | : 0.10 |
| fragment_171.1125 | : 0.04 |
| fragment_624.2175 | : 0.03 |
| loss_166.1125     | : 0.02 |
| loss_132.1275     | : 0.01 |
| loss_113.2075     | : 0.01 |
| fragment_437.3275 | : 0.01 |
| loss_145.1375     | : 0.01 |
| loss_143.2175     | : 0.01 |
| loss_19.1025      | : 0.01 |

urine\_mass2motif\_272.m2m

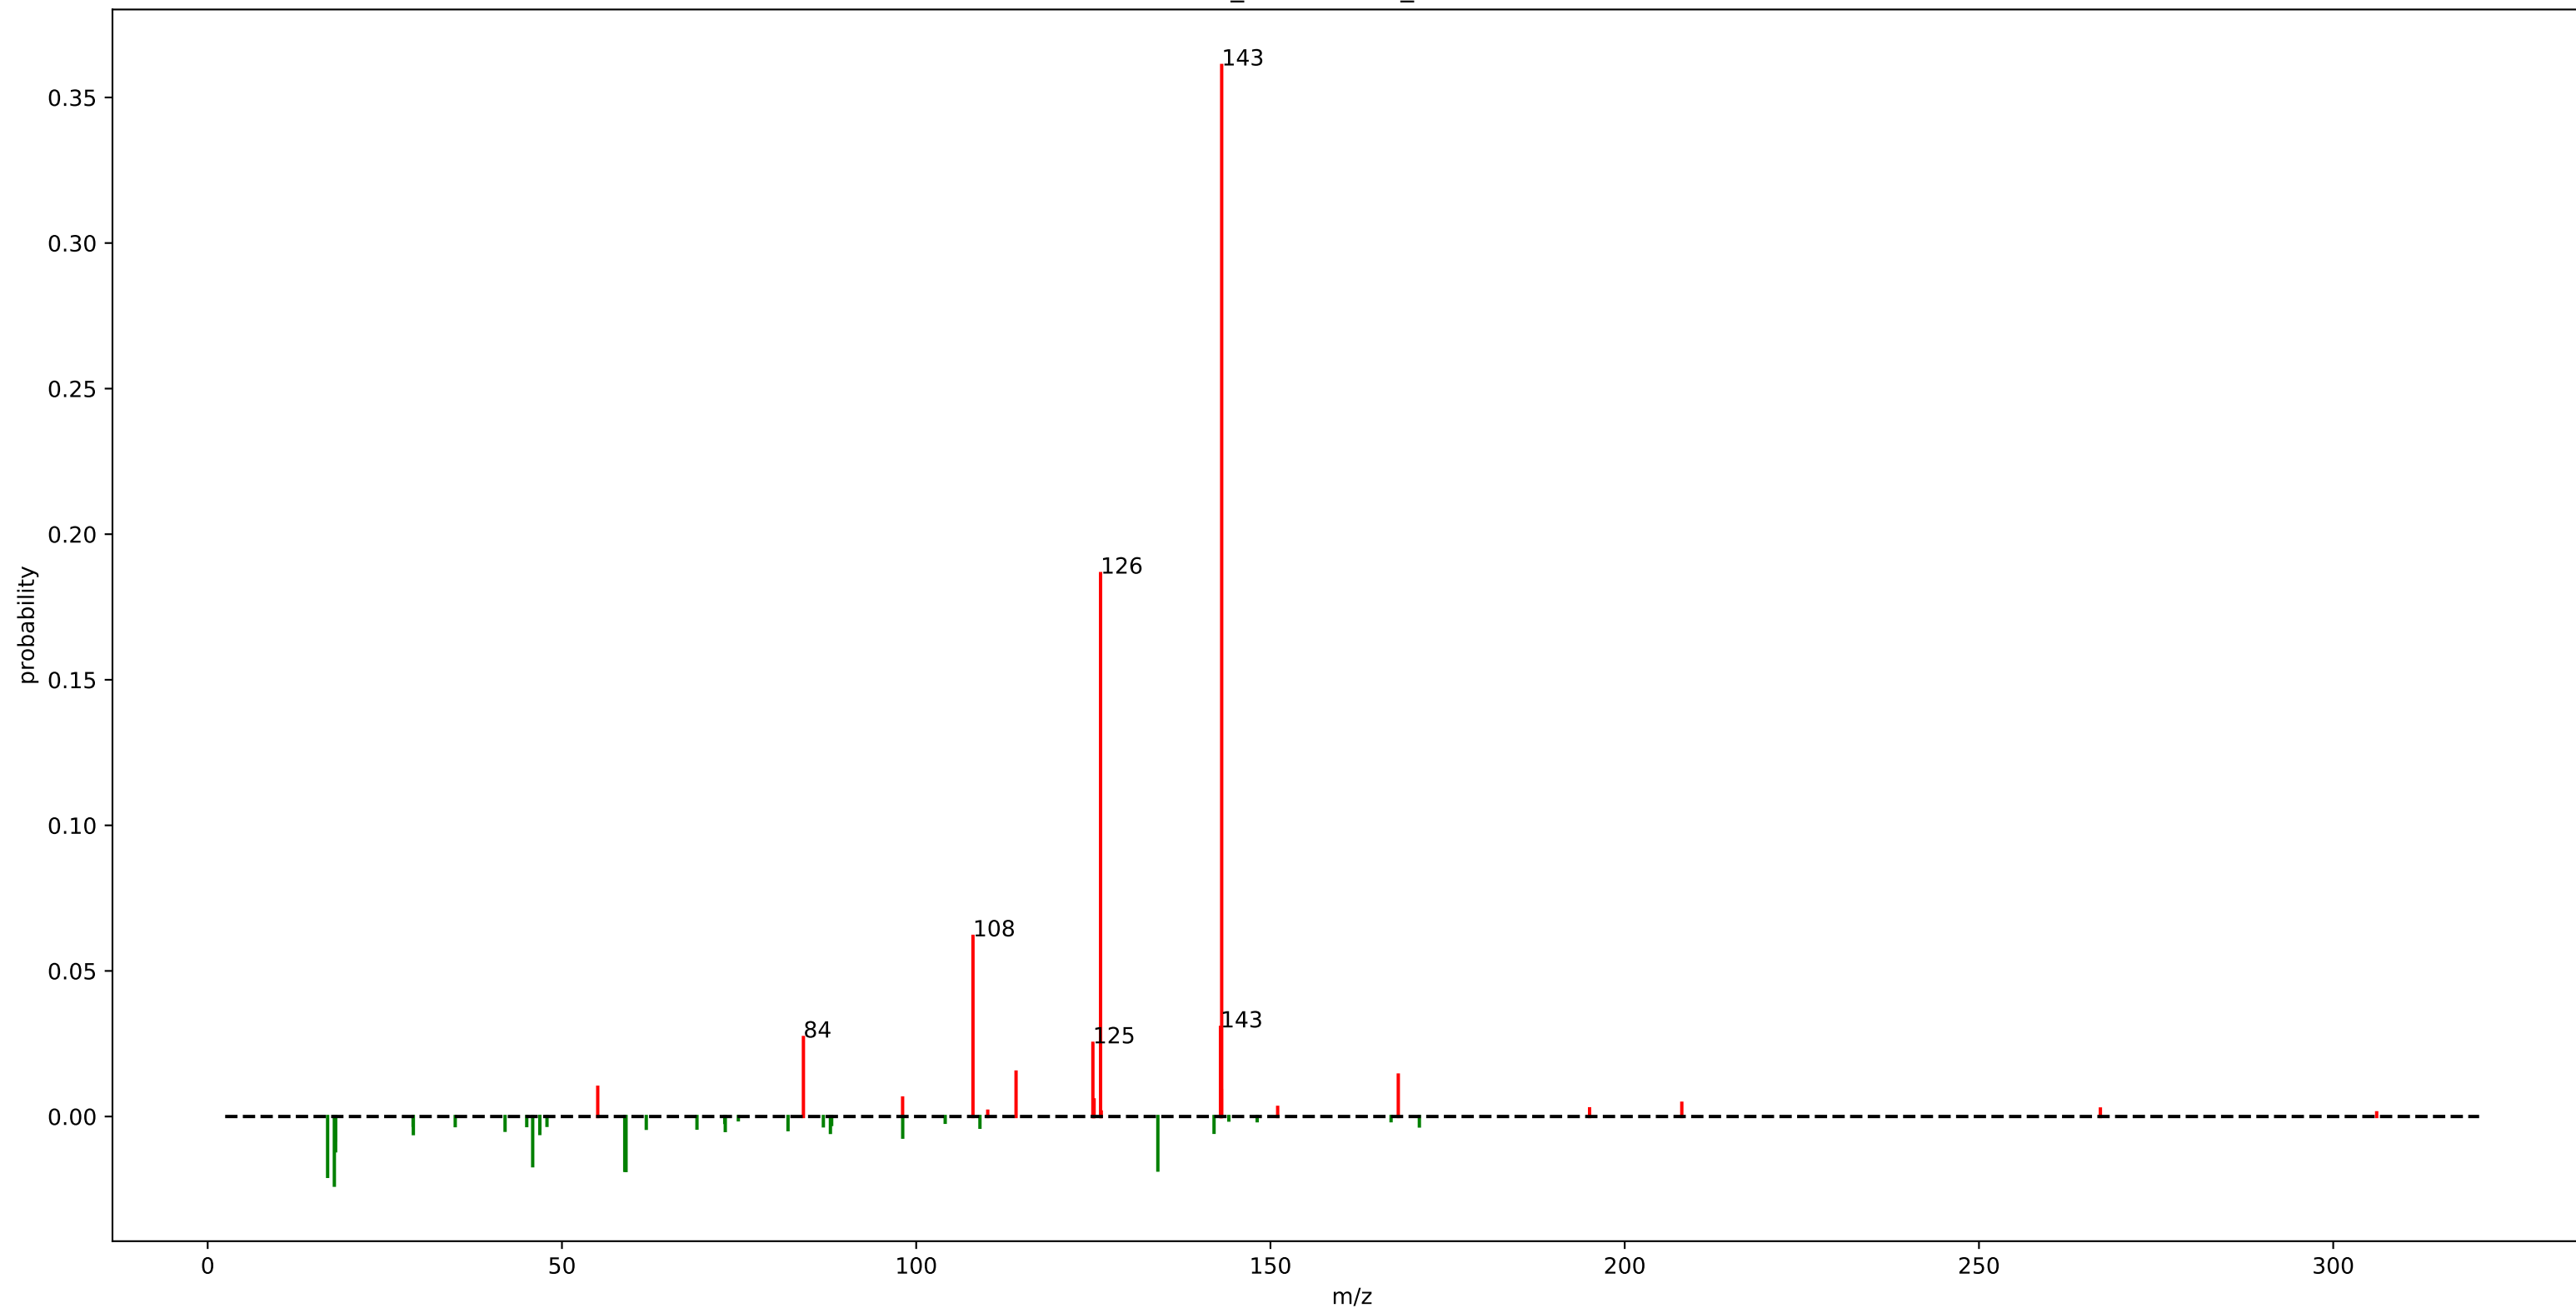

# urine\_mass2motif\_272.m2m

|                   |        |                   |        |
|-------------------|--------|-------------------|--------|
| fragment_143.1175 | : 0.36 | loss_29.0275      | : 0.01 |
| fragment_126.0225 | : 0.19 | loss_46.8775      | : 0.01 |
| fragment_108.0125 | : 0.06 | fragment_125.1075 | : 0.01 |
| fragment_142.9475 | : 0.03 | loss_87.8925      | : 0.01 |
| fragment_84.0825  | : 0.03 | loss_142.0375     | : 0.01 |
| fragment_124.9375 | : 0.03 |                   |        |
| loss_17.8775      | : 0.02 |                   |        |
| loss_16.9275      | : 0.02 |                   |        |
| loss_59.0475      | : 0.02 |                   |        |
| loss_58.8675      | : 0.02 |                   |        |
| loss_134.1075     | : 0.02 |                   |        |
| loss_45.8725      | : 0.02 |                   |        |
| fragment_114.0925 | : 0.02 |                   |        |
| fragment_168.0425 | : 0.01 |                   |        |
| loss_18.0575      | : 0.01 |                   |        |
| fragment_55.0525  | : 0.01 |                   |        |
| fragment_143.0825 | : 0.01 |                   |        |
| loss_18.0125      | : 0.01 |                   |        |
| loss_98.0975      | : 0.01 |                   |        |
| fragment_98.0825  | : 0.01 |                   |        |

urine\_mass2motif\_23.m2m

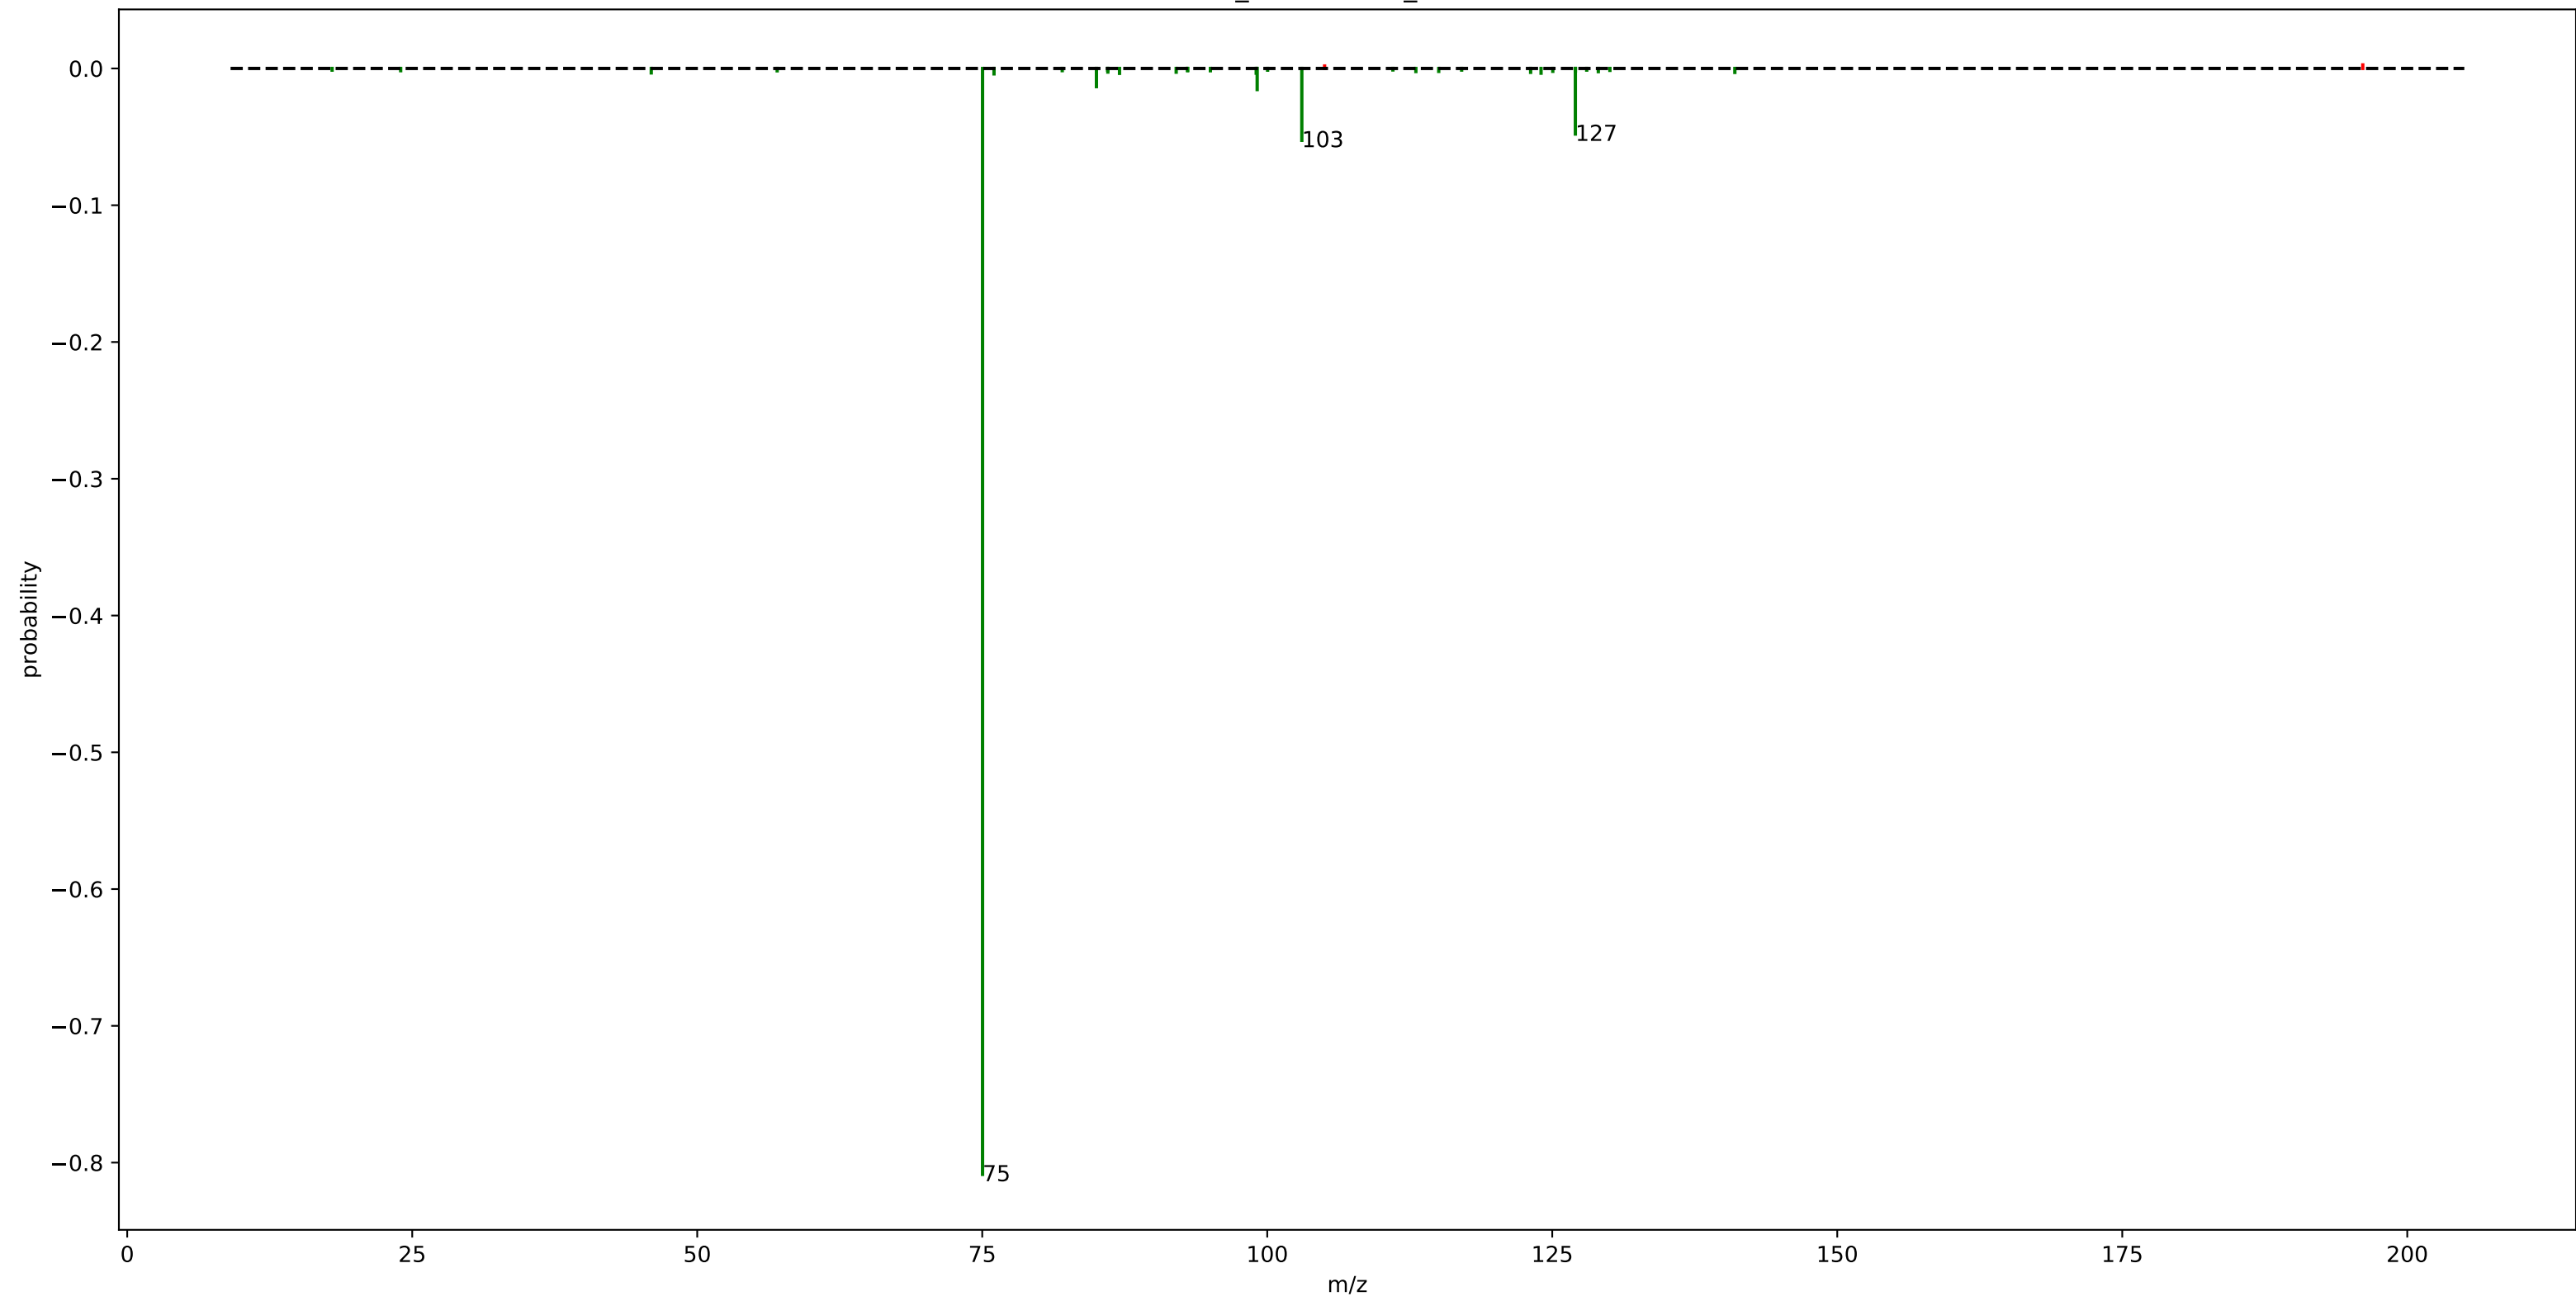

## urine\_mass2motif\_23.m2m

|               |        |
|---------------|--------|
| loss_75.0275  | : 0.81 |
| loss_103.0325 | : 0.05 |
| loss_127.0275 | : 0.05 |
| loss_99.1175  | : 0.02 |
| loss_85.0175  | : 0.01 |

gnps\_motif\_3.m2m

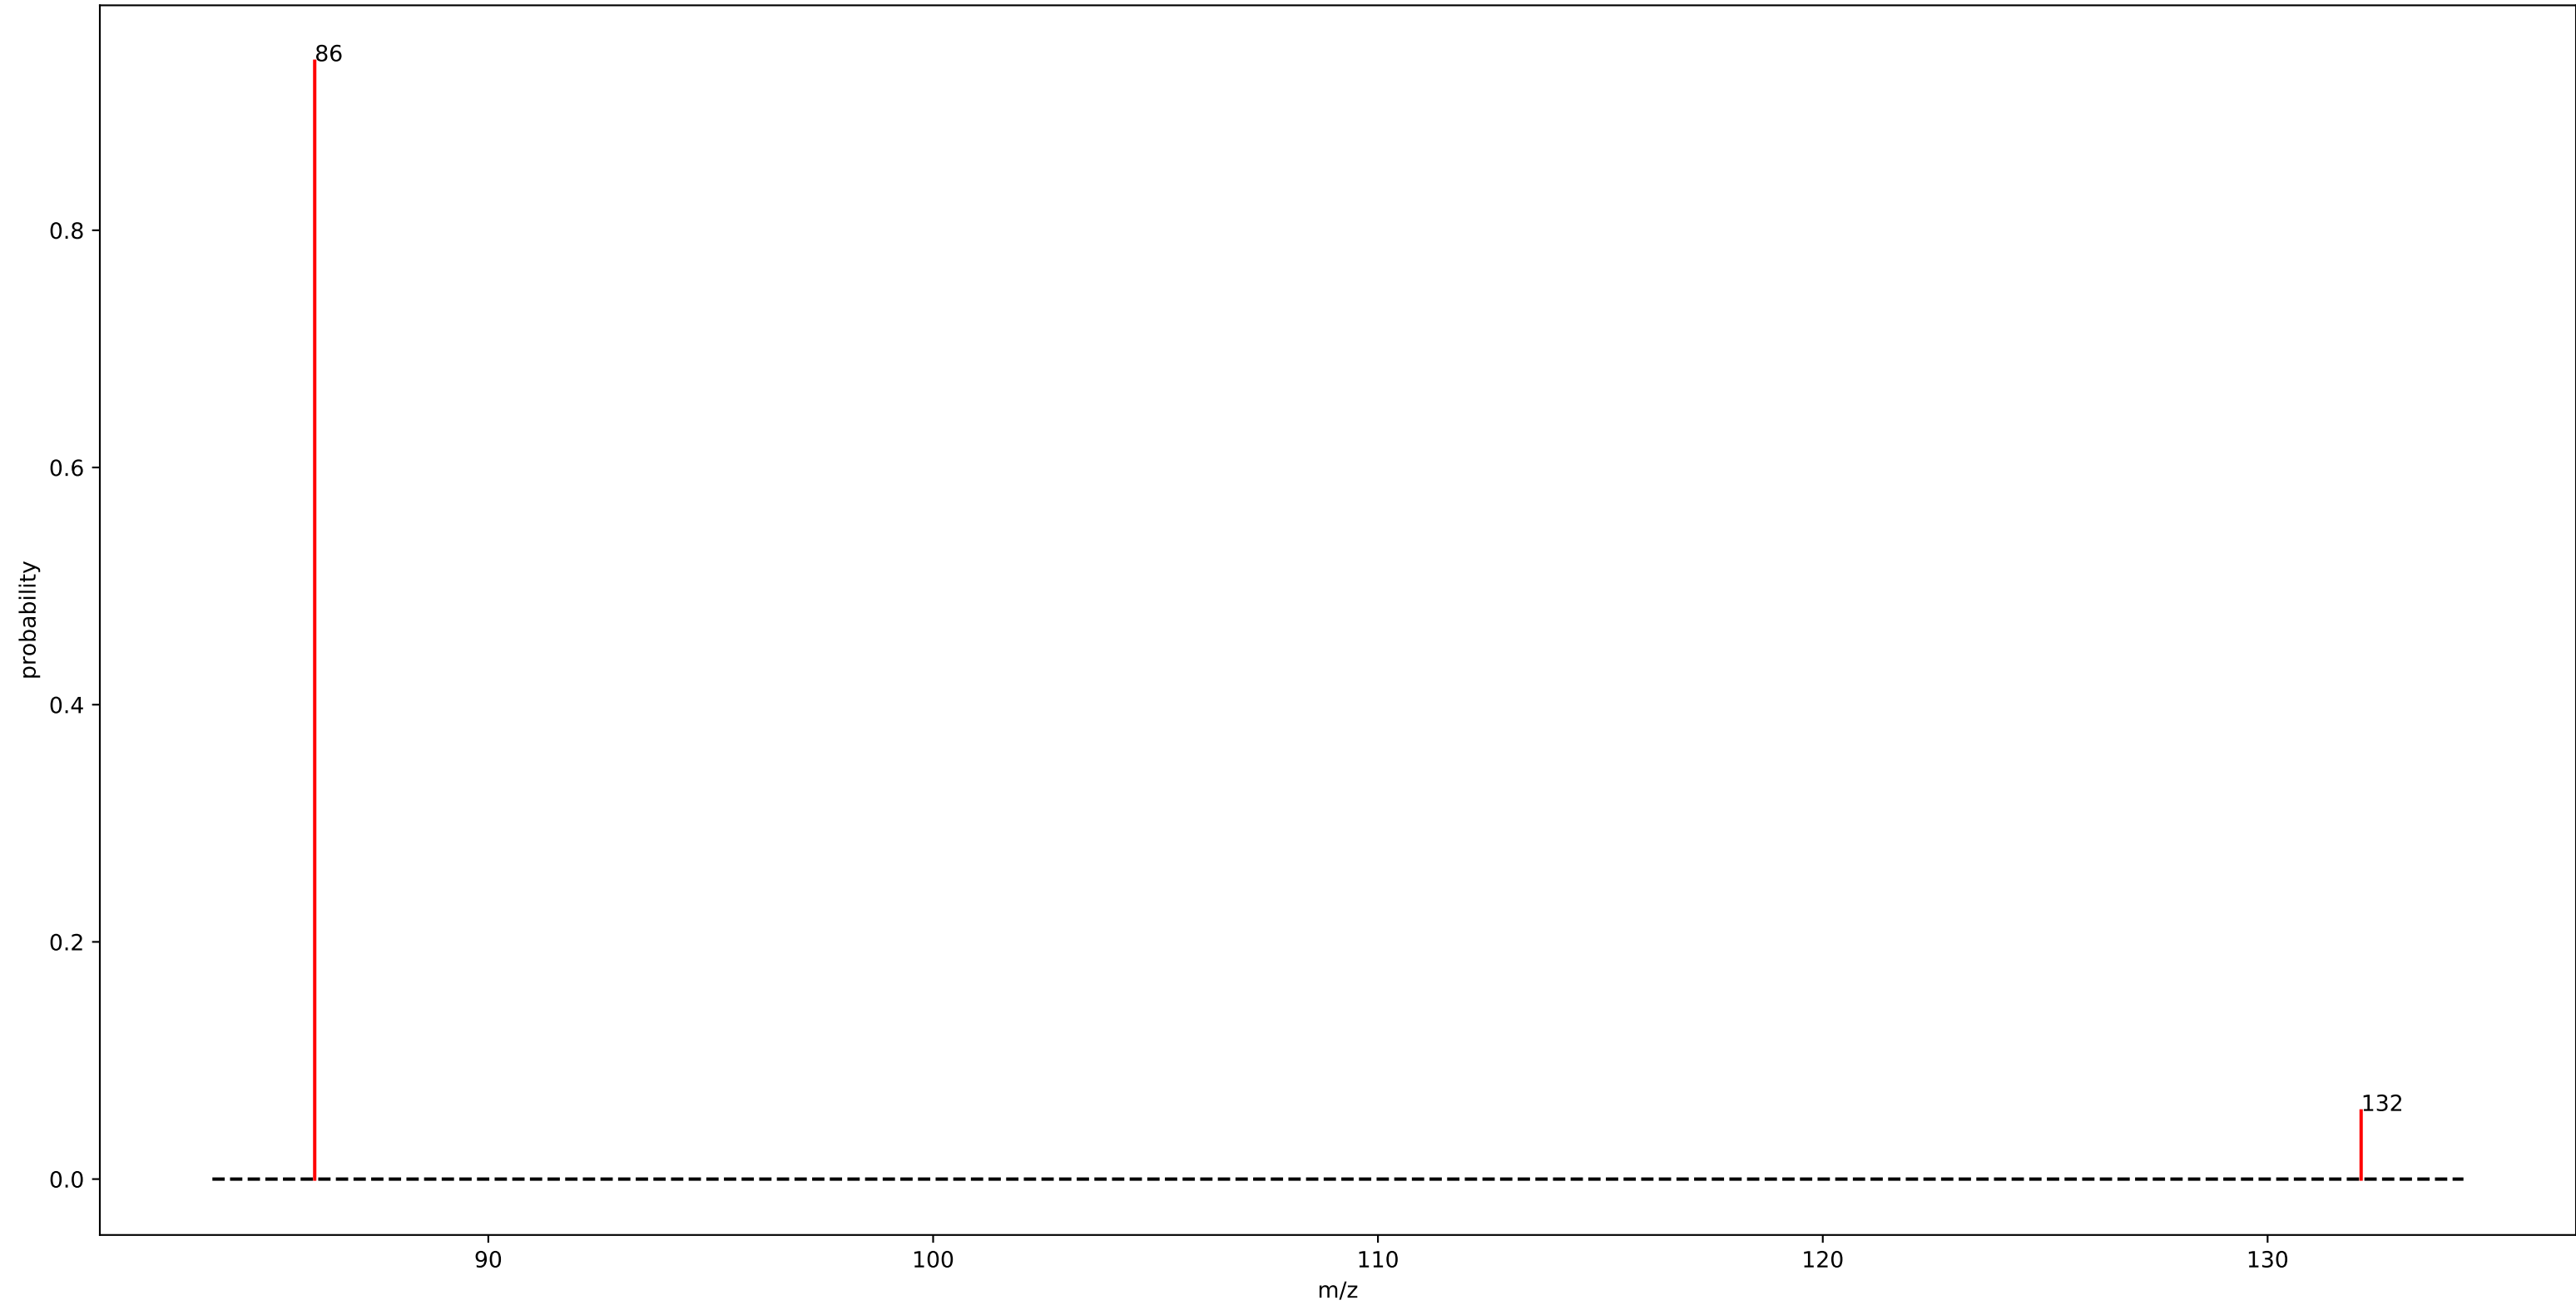

# gnps\_motif\_3.m2m

fragment\_86.0975 : 0.94  
fragment\_132.1025 : 0.06



motif\_558

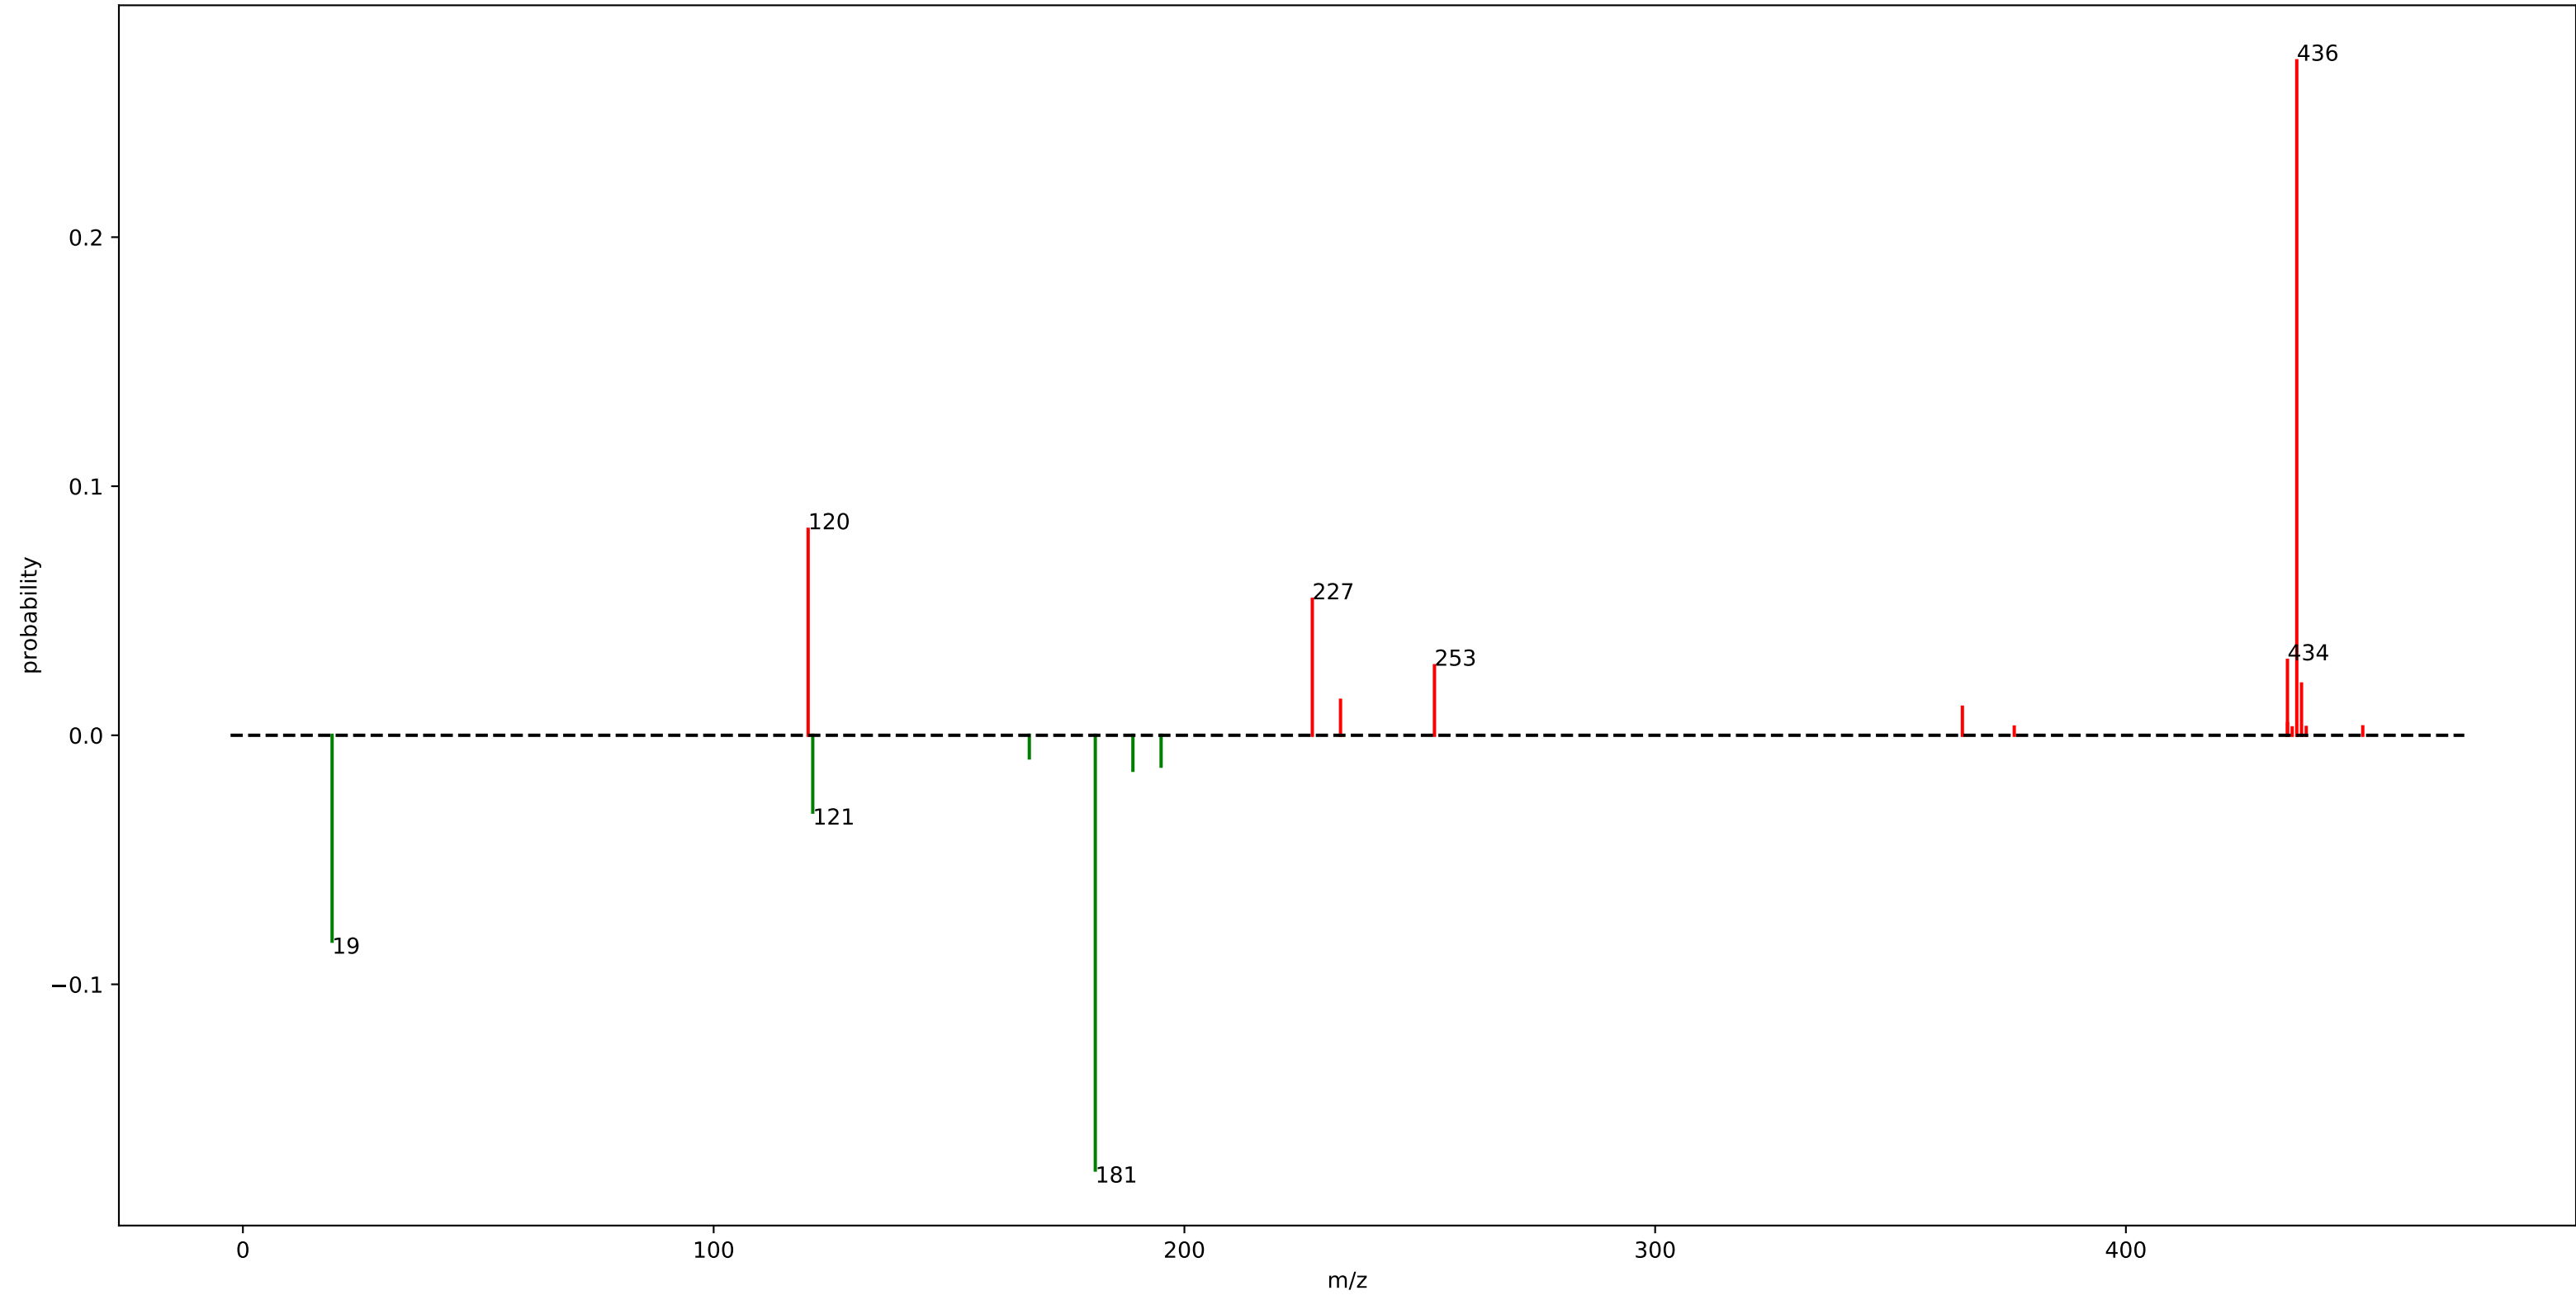

## motif\_558

|                   |        |
|-------------------|--------|
| fragment_436.3025 | : 0.27 |
| loss_181.0725     | : 0.17 |
| fragment_120.0725 | : 0.08 |
| loss_18.9475      | : 0.08 |
| fragment_227.1725 | : 0.05 |
| loss_121.0525     | : 0.03 |
| fragment_434.3225 | : 0.03 |
| fragment_253.1175 | : 0.03 |
| fragment_437.3075 | : 0.02 |
| fragment_233.1625 | : 0.01 |
| loss_189.0625     | : 0.01 |
| loss_195.0525     | : 0.01 |
| fragment_365.2675 | : 0.01 |
| loss_167.0575     | : 0.01 |

rhabdus\_motif\_287.m2m

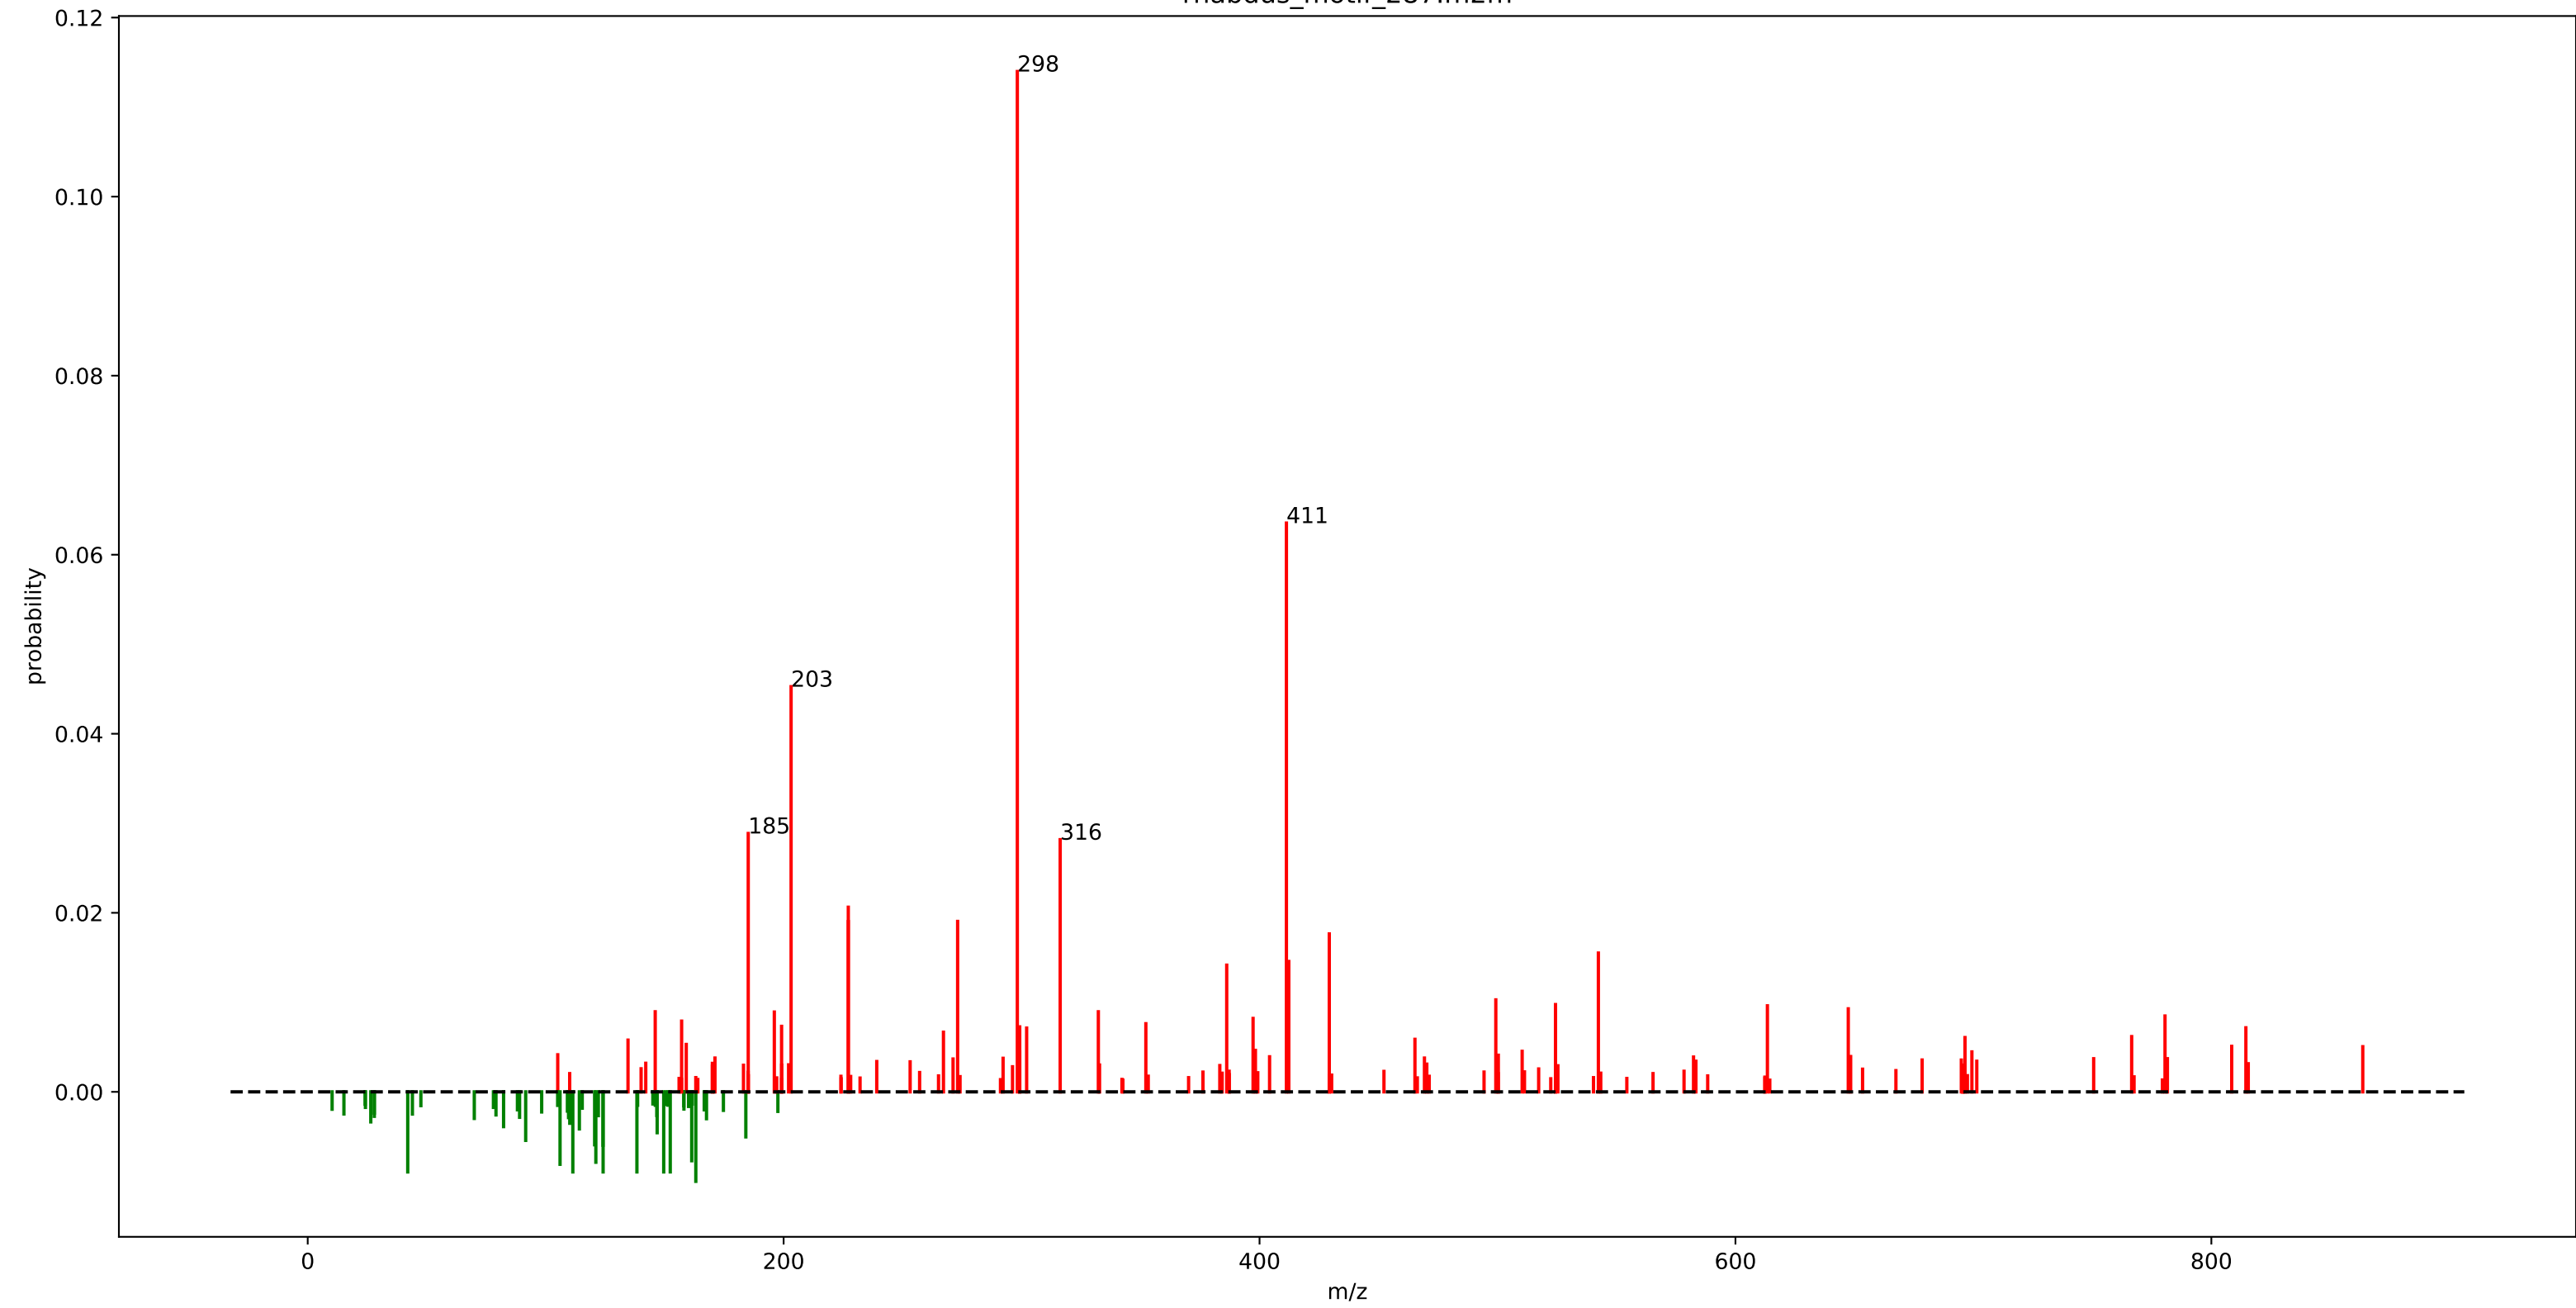

# rhabdus\_motif\_287.m2m

|                   |        |                   |        |                   |        |
|-------------------|--------|-------------------|--------|-------------------|--------|
| fragment_298.2125 | : 0.11 | fragment_332.2625 | : 0.01 | fragment_696.4675 | : 0.01 |
| fragment_411.2975 | : 0.06 | loss_124.1425     | : 0.01 | loss_124.0875     | : 0.01 |
| fragment_203.1375 | : 0.05 | loss_149.6075     | : 0.01 | loss_120.5825     | : 0.01 |
| fragment_185.1275 | : 0.03 | loss_111.4125     | : 0.01 | fragment_465.3075 | : 0.01 |
| fragment_316.2225 | : 0.03 | loss_138.3475     | : 0.01 | fragment_134.6025 | : 0.01 |
| fragment_227.1775 | : 0.02 | loss_152.3525     | : 0.01 | loss_91.6025      | : 0.01 |
| fragment_273.1225 | : 0.02 | fragment_196.0875 | : 0.01 | fragment_159.0875 | : 0.01 |
| fragment_227.1725 | : 0.02 | fragment_780.5225 | : 0.01 | fragment_808.5525 | : 0.01 |
| fragment_429.3075 | : 0.02 | fragment_397.2825 | : 0.01 | fragment_863.6325 | : 0.01 |
| fragment_542.3925 | : 0.02 | loss_106.0425     | : 0.01 | loss_184.1175     | : 0.01 |
| fragment_412.2975 | : 0.01 | fragment_157.1325 | : 0.01 |                   |        |
| fragment_386.2075 | : 0.01 | loss_121.0875     | : 0.01 |                   |        |
| fragment_499.2925 | : 0.01 | loss_161.3775     | : 0.01 |                   |        |
| loss_163.0975     | : 0.01 | fragment_352.2225 | : 0.01 |                   |        |
| fragment_524.3775 | : 0.01 | fragment_199.1425 | : 0.01 |                   |        |
| fragment_613.4275 | : 0.01 | fragment_299.2175 | : 0.01 |                   |        |
| fragment_524.3825 | : 0.01 | fragment_814.5075 | : 0.01 |                   |        |
| fragment_647.4125 | : 0.01 | fragment_302.1275 | : 0.01 |                   |        |
| fragment_146.0375 | : 0.01 | fragment_267.1675 | : 0.01 |                   |        |
| loss_42.0325      | : 0.01 | fragment_766.5075 | : 0.01 |                   |        |

euphorbia\_motif\_3.m2m

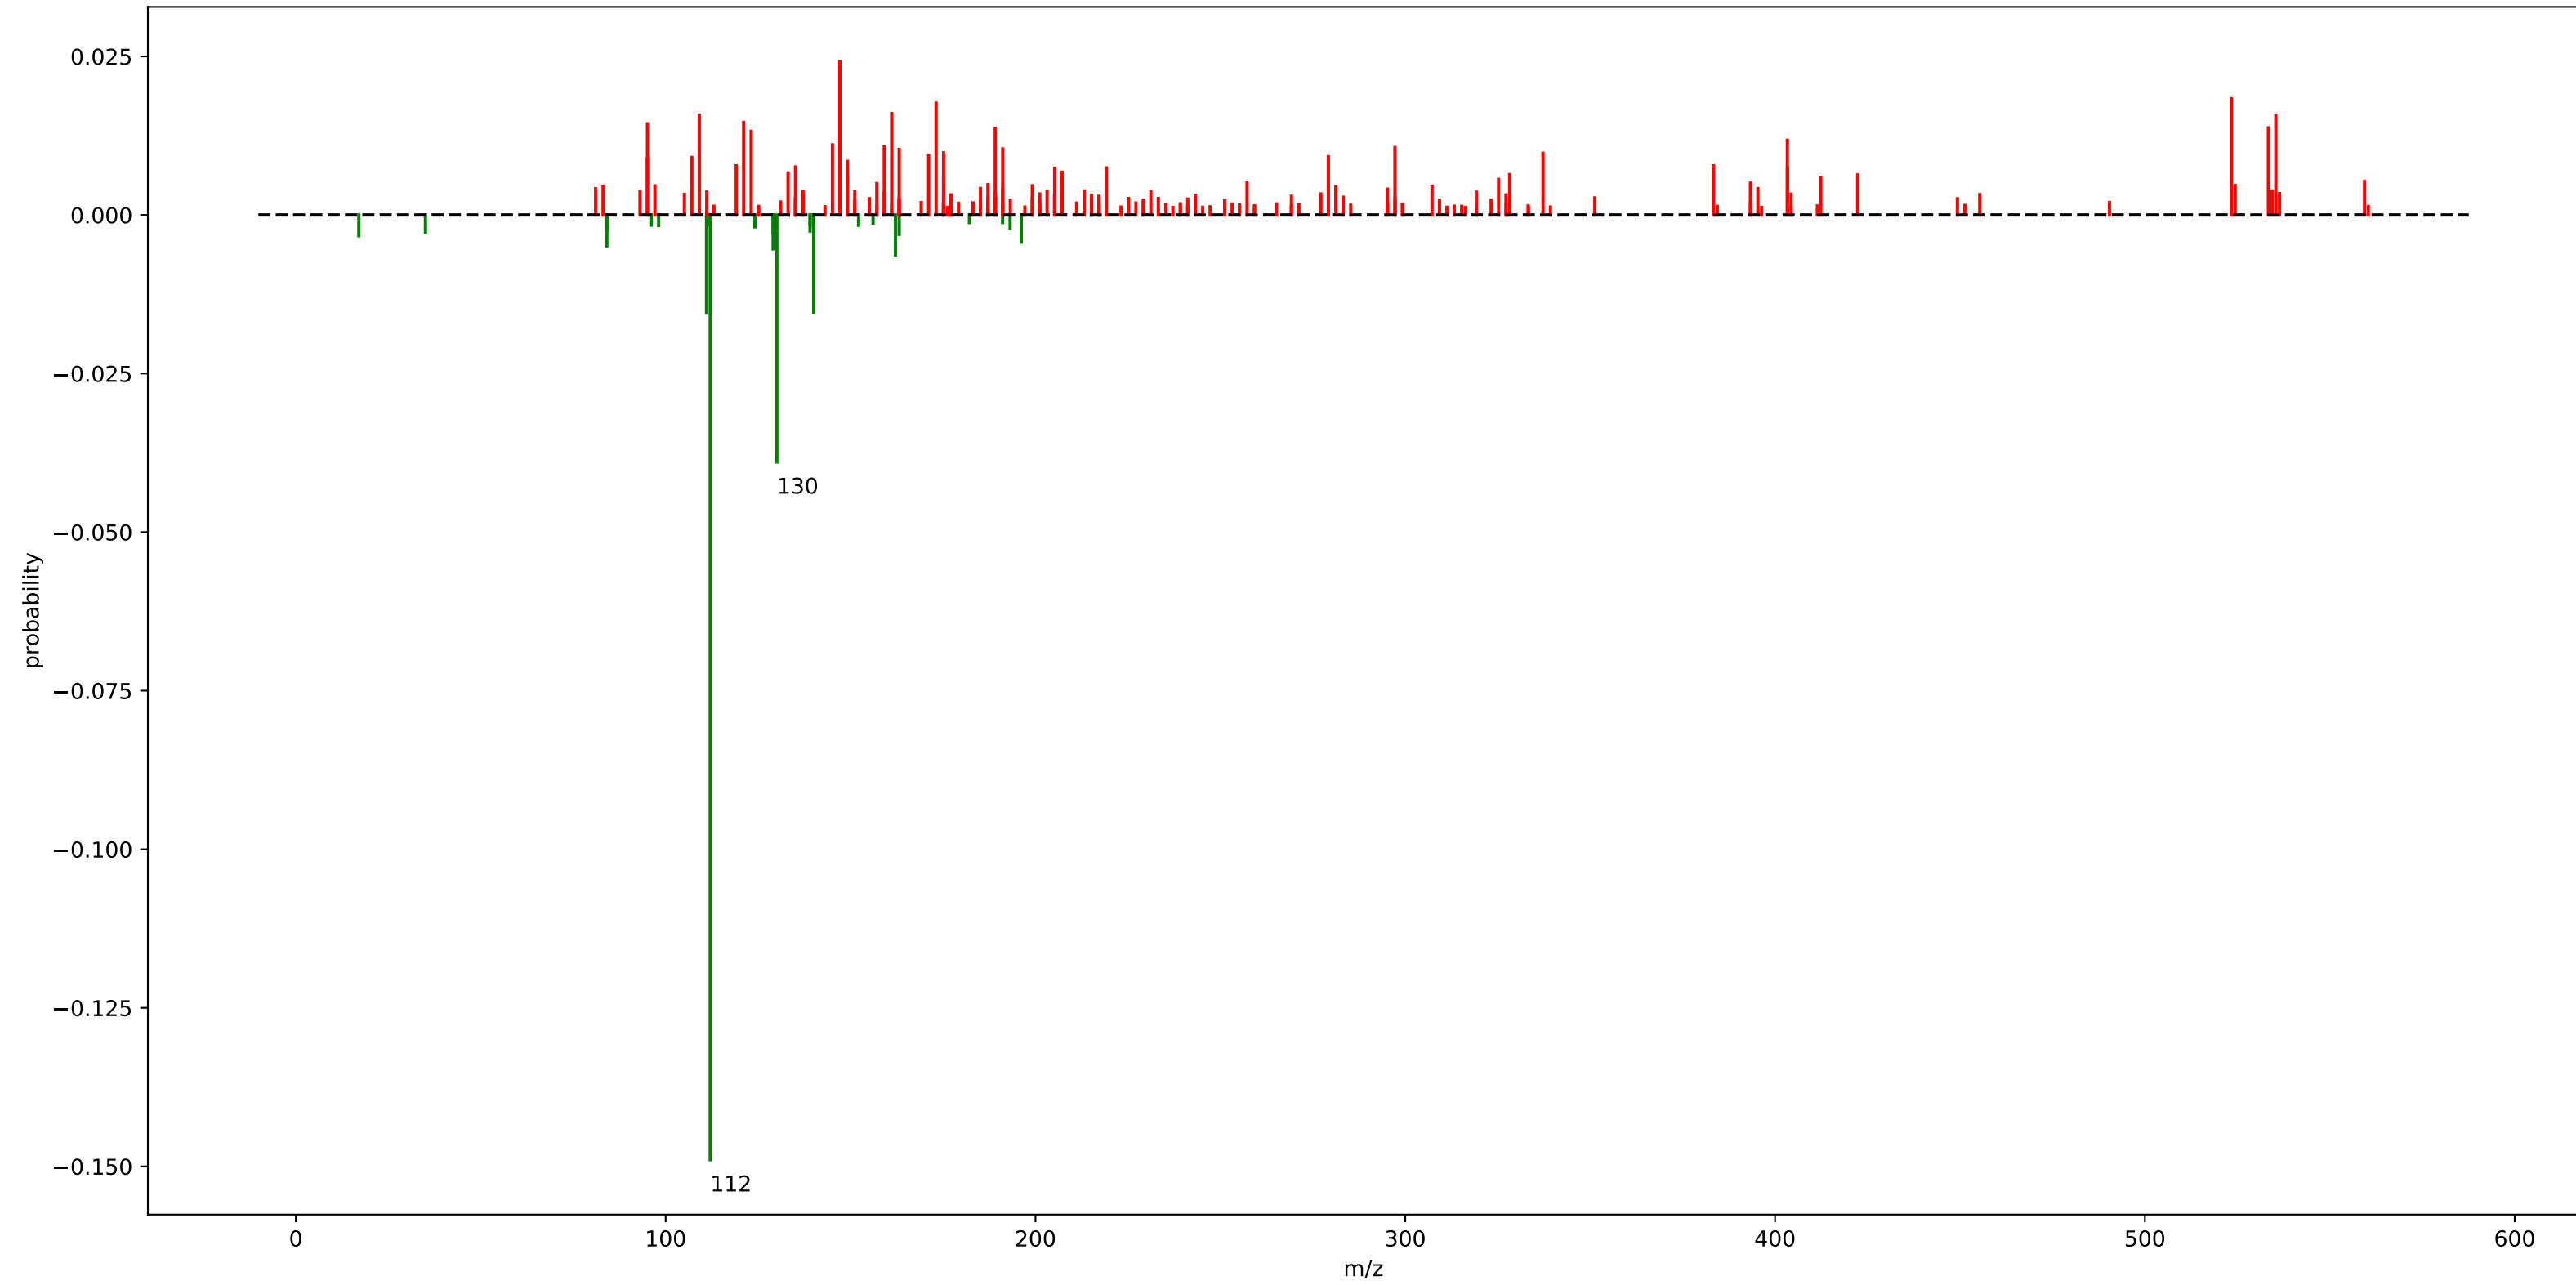

# euphorbia\_motif\_3.m2m

|                   |        |                   |        |                   |        |
|-------------------|--------|-------------------|--------|-------------------|--------|
| loss_112.0575     | : 0.15 | fragment_163.1425 | : 0.01 | fragment_412.3575 | : 0.01 |
| loss_130.0675     | : 0.04 | loss_140.0525     | : 0.01 | fragment_175.1425 | : 0.01 |
| fragment_147.1125 | : 0.02 | fragment_175.1475 | : 0.01 | fragment_149.1275 | : 0.01 |
| fragment_523.4075 | : 0.02 | fragment_337.2475 | : 0.01 | fragment_325.2475 | : 0.01 |
| fragment_173.1275 | : 0.02 | fragment_171.1125 | : 0.01 | loss_129.0625     | : 0.01 |
| fragment_161.1275 | : 0.02 | fragment_279.2075 | : 0.01 | fragment_559.4075 | : 0.01 |
| fragment_535.4075 | : 0.02 | fragment_107.0825 | : 0.01 | fragment_257.2225 | : 0.01 |
| fragment_109.0975 | : 0.02 | fragment_95.0475  | : 0.01 | fragment_393.3475 | : 0.01 |
| loss_111.0575     | : 0.02 | fragment_149.1325 | : 0.01 |                   |        |
| loss_140.0475     | : 0.02 | fragment_119.0825 | : 0.01 |                   |        |
| fragment_121.0975 | : 0.01 | fragment_383.3625 | : 0.01 |                   |        |
| fragment_95.0825  | : 0.01 | fragment_135.1125 | : 0.01 |                   |        |
| fragment_533.3925 | : 0.01 | fragment_219.2075 | : 0.01 |                   |        |
| fragment_189.1225 | : 0.01 | fragment_205.1925 | : 0.01 |                   |        |
| fragment_123.1125 | : 0.01 | fragment_403.3325 | : 0.01 |                   |        |
| fragment_403.3275 | : 0.01 | fragment_207.2075 | : 0.01 |                   |        |
| fragment_145.0975 | : 0.01 | fragment_133.0975 | : 0.01 |                   |        |
| fragment_159.1125 | : 0.01 | fragment_328.2475 | : 0.01 |                   |        |
| fragment_297.2175 | : 0.01 | fragment_422.3425 | : 0.01 |                   |        |
| fragment_191.1425 | : 0.01 | loss_162.1425     | : 0.01 |                   |        |

motif\_484

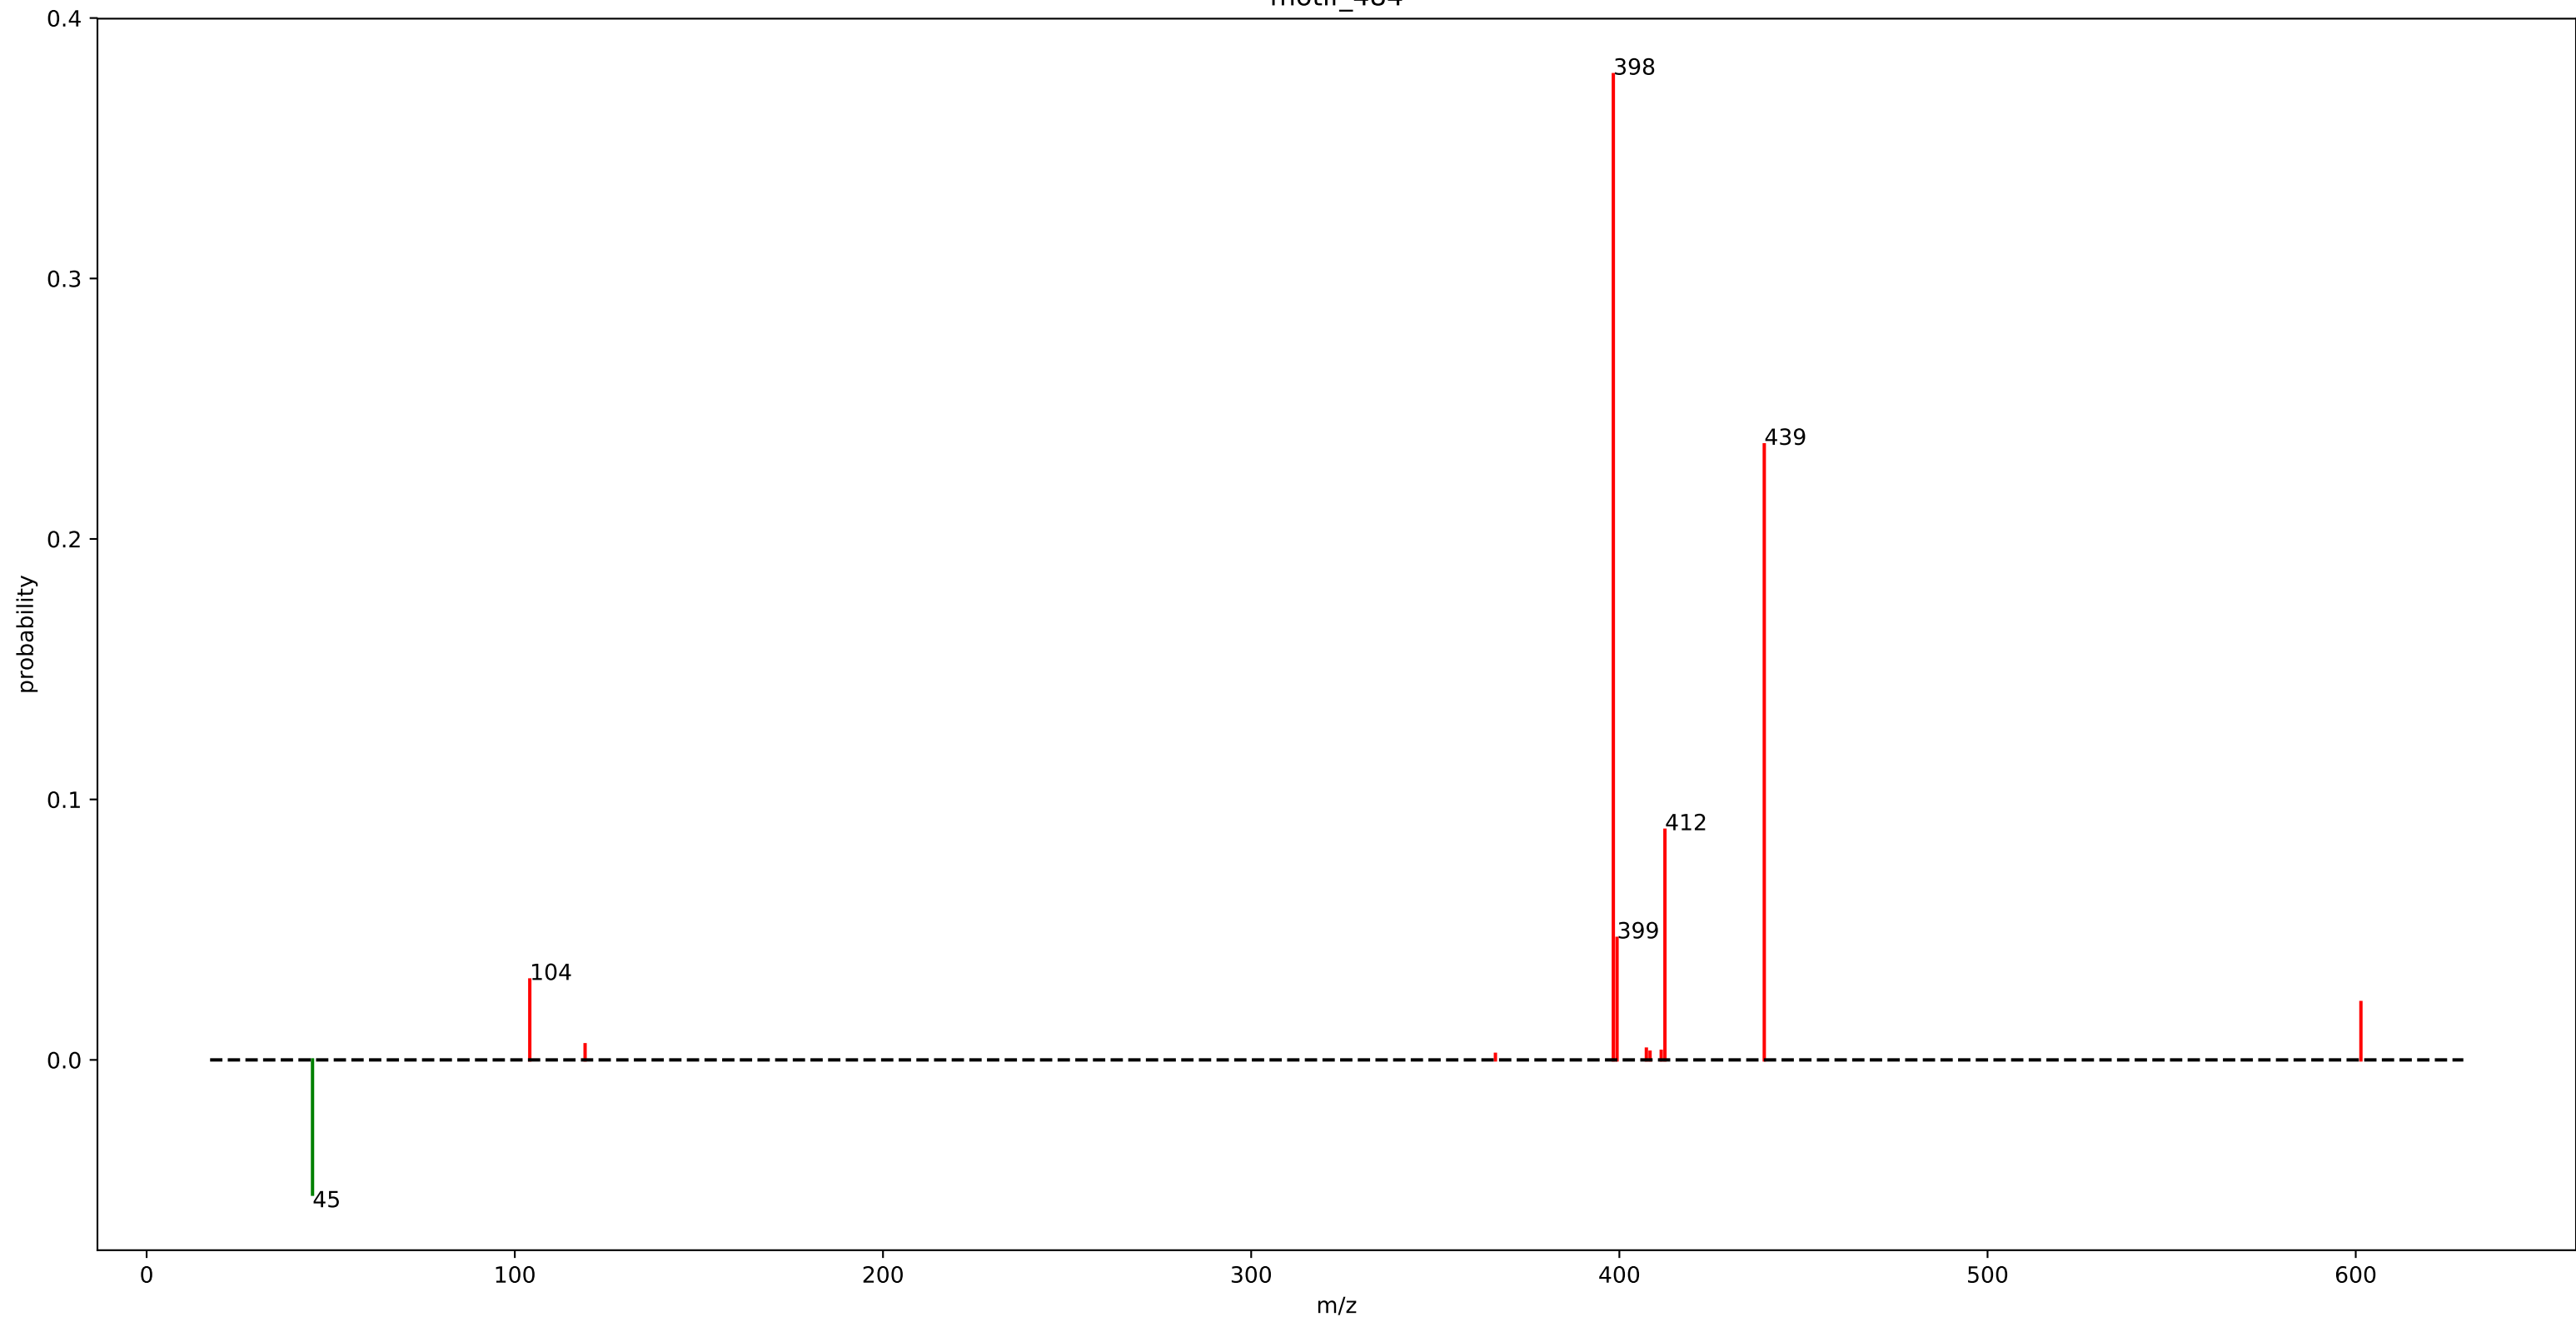

## motif\_484

|                   |        |
|-------------------|--------|
| fragment_398.3625 | : 0.38 |
| fragment_439.3575 | : 0.24 |
| fragment_412.3775 | : 0.09 |
| loss_45.0575      | : 0.05 |
| fragment_399.3675 | : 0.05 |
| fragment_104.0675 | : 0.03 |
| fragment_601.4075 | : 0.02 |
| fragment_119.0875 | : 0.01 |



rhabdus\_motif\_286.m2m

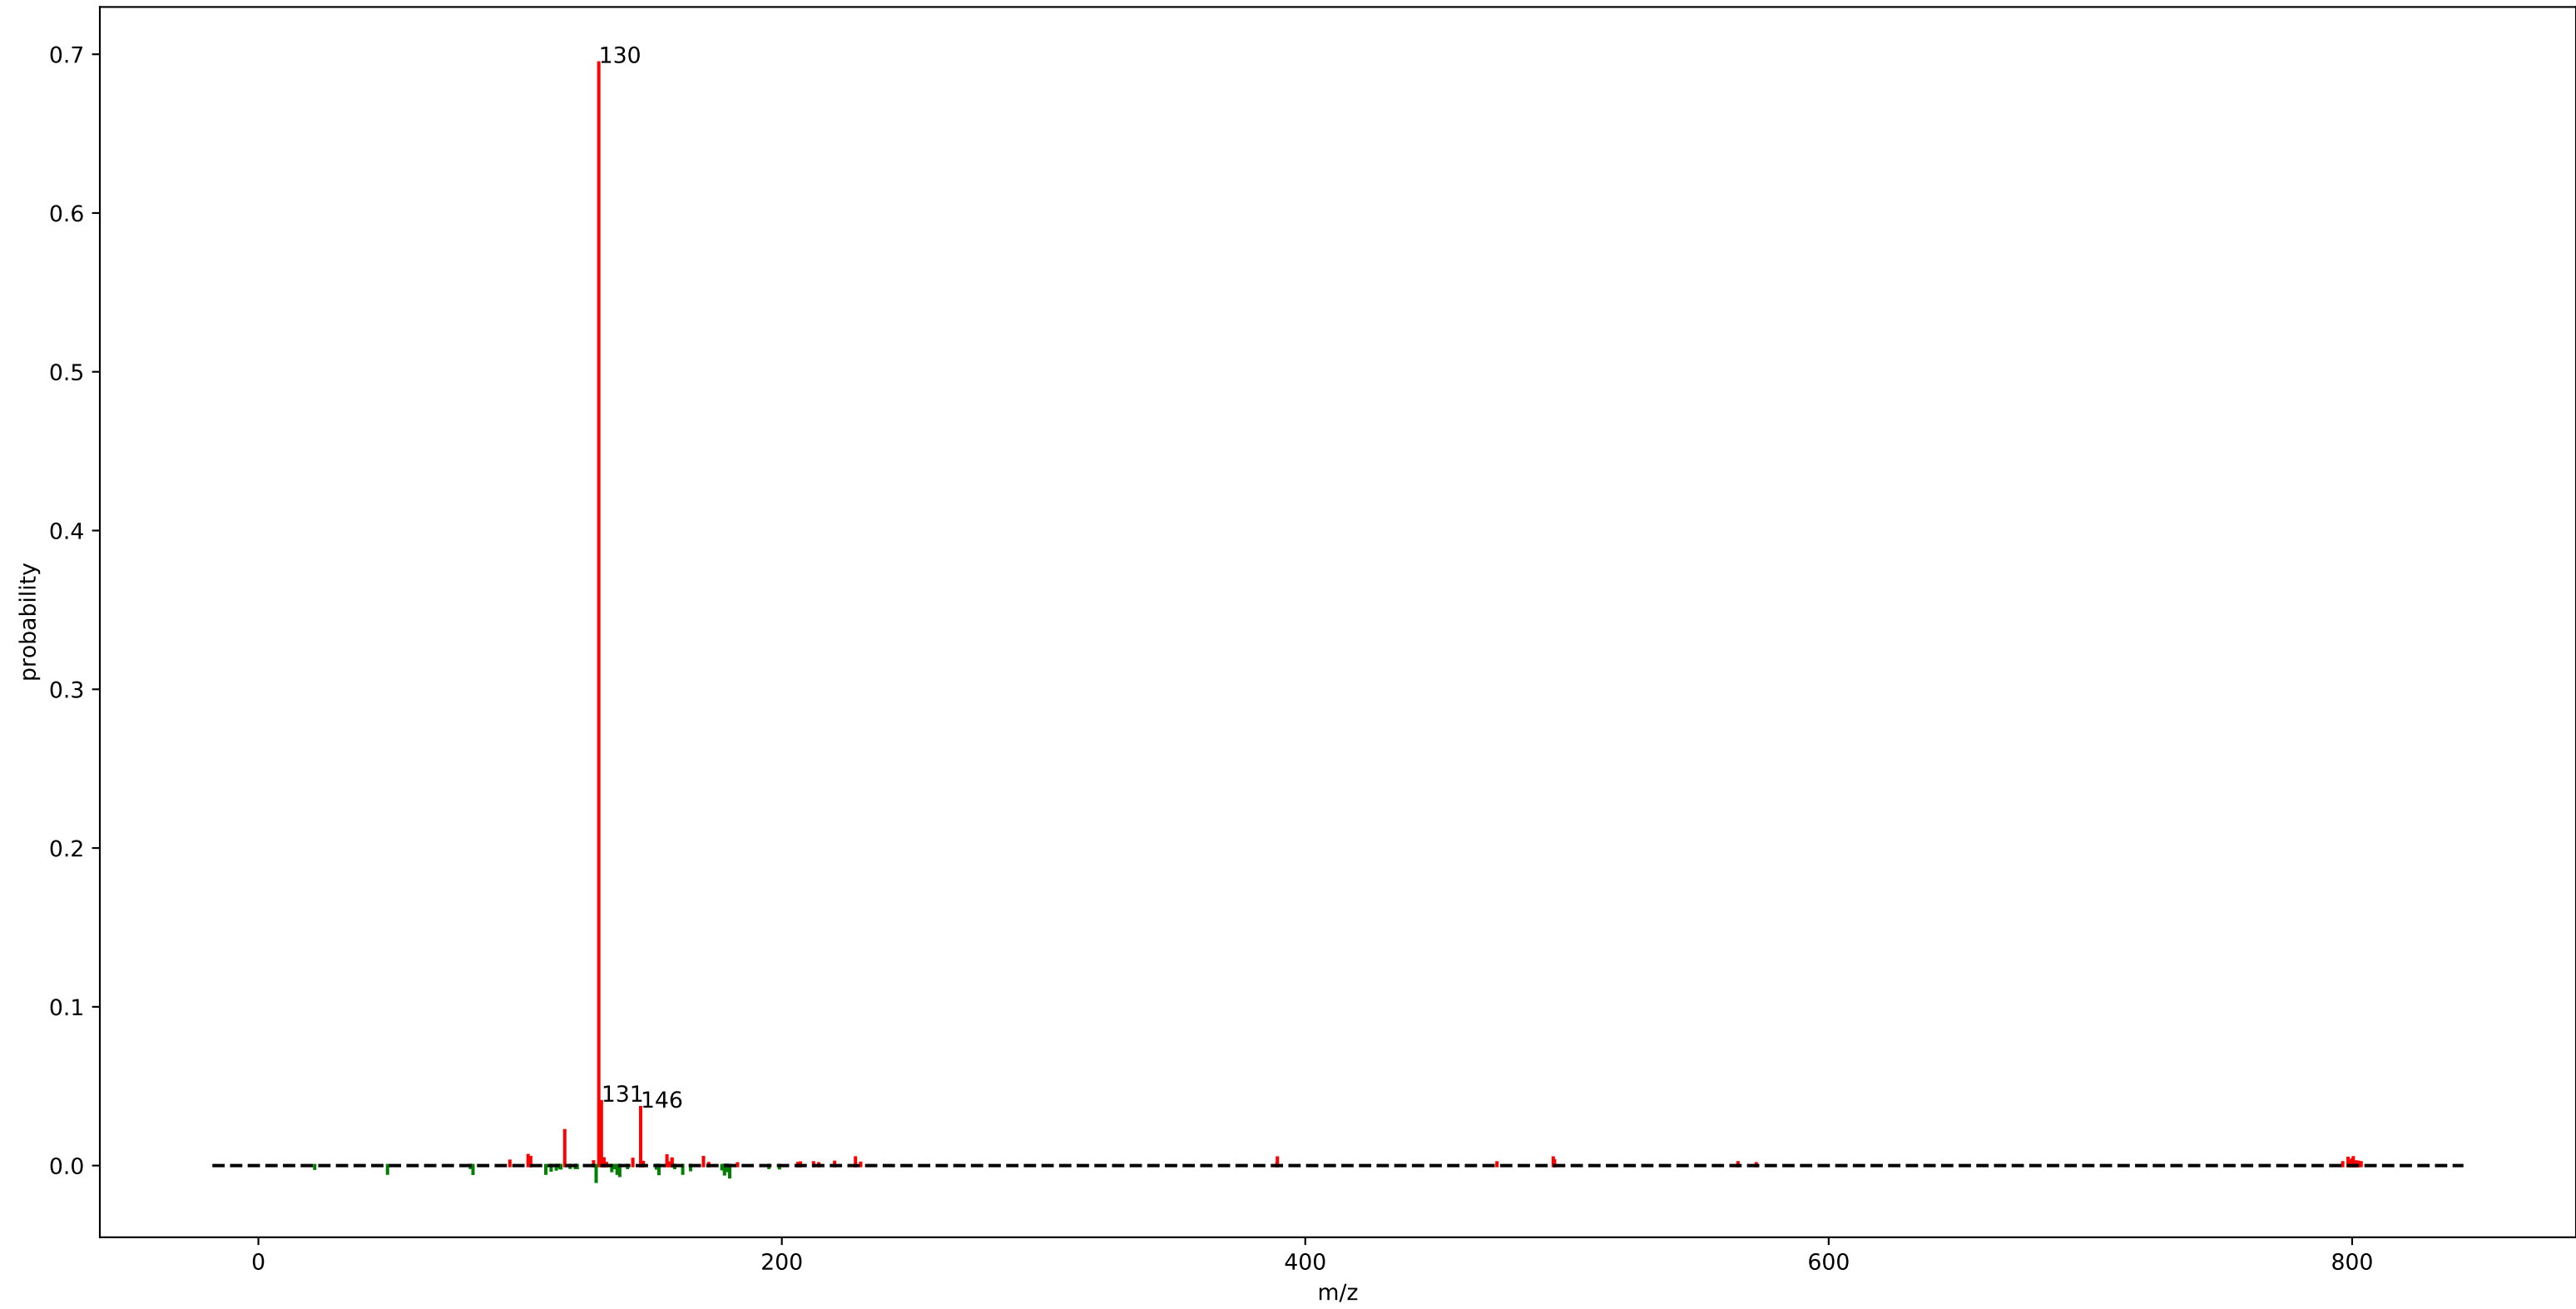

## rhabdus\_motif\_286.m2m

|                   |        |
|-------------------|--------|
| fragment_130.0625 | : 0.69 |
| fragment_131.0675 | : 0.04 |
| fragment_146.0575 | : 0.04 |
| fragment_117.0575 | : 0.02 |
| loss_129.0575     | : 0.01 |
| loss_180.0775     | : 0.01 |
| fragment_103.0525 | : 0.01 |
| loss_138.0675     | : 0.01 |
| fragment_156.1025 | : 0.01 |
| loss_178.0975     | : 0.01 |
| fragment_170.0575 | : 0.01 |
| fragment_104.0525 | : 0.01 |
| loss_153.0425     | : 0.01 |

motif\_676

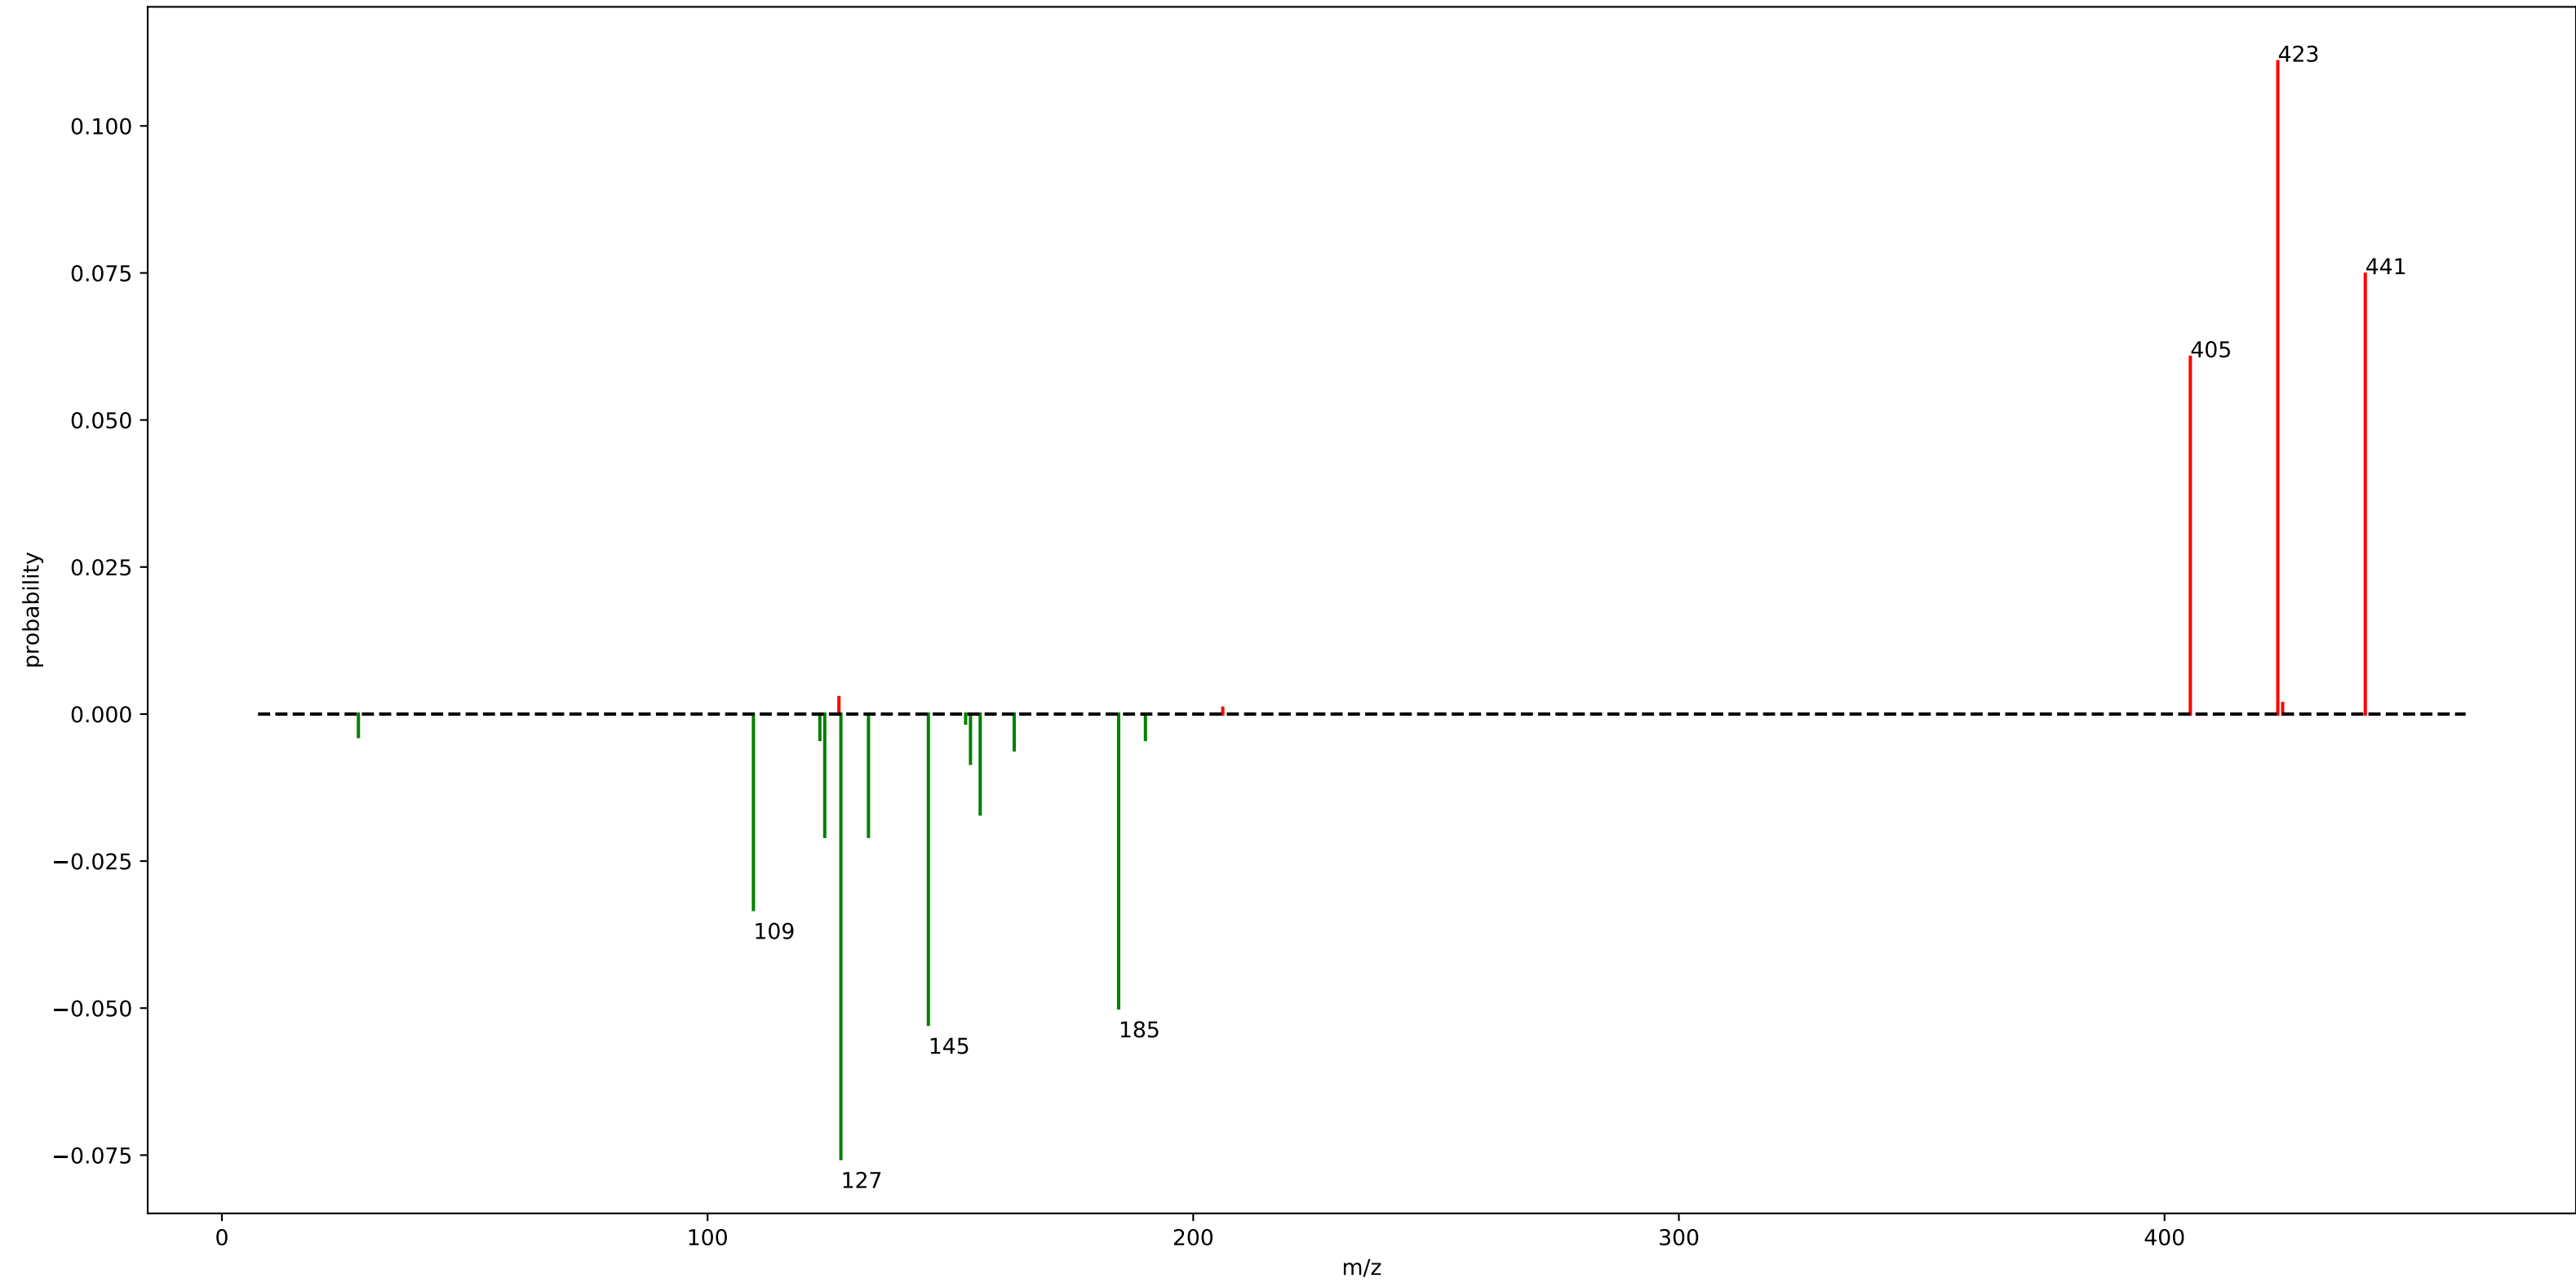

## motif\_676

|                   |        |
|-------------------|--------|
| fragment_423.3275 | : 0.11 |
| loss_127.4575     | : 0.08 |
| fragment_441.3375 | : 0.07 |
| fragment_405.3175 | : 0.06 |
| loss_145.4675     | : 0.05 |
| loss_184.6425     | : 0.05 |
| loss_109.4475     | : 0.03 |
| loss_124.1325     | : 0.02 |
| loss_133.1325     | : 0.02 |
| loss_156.1375     | : 0.02 |
| loss_154.1425     | : 0.01 |
| loss_163.1425     | : 0.01 |

motif\_578

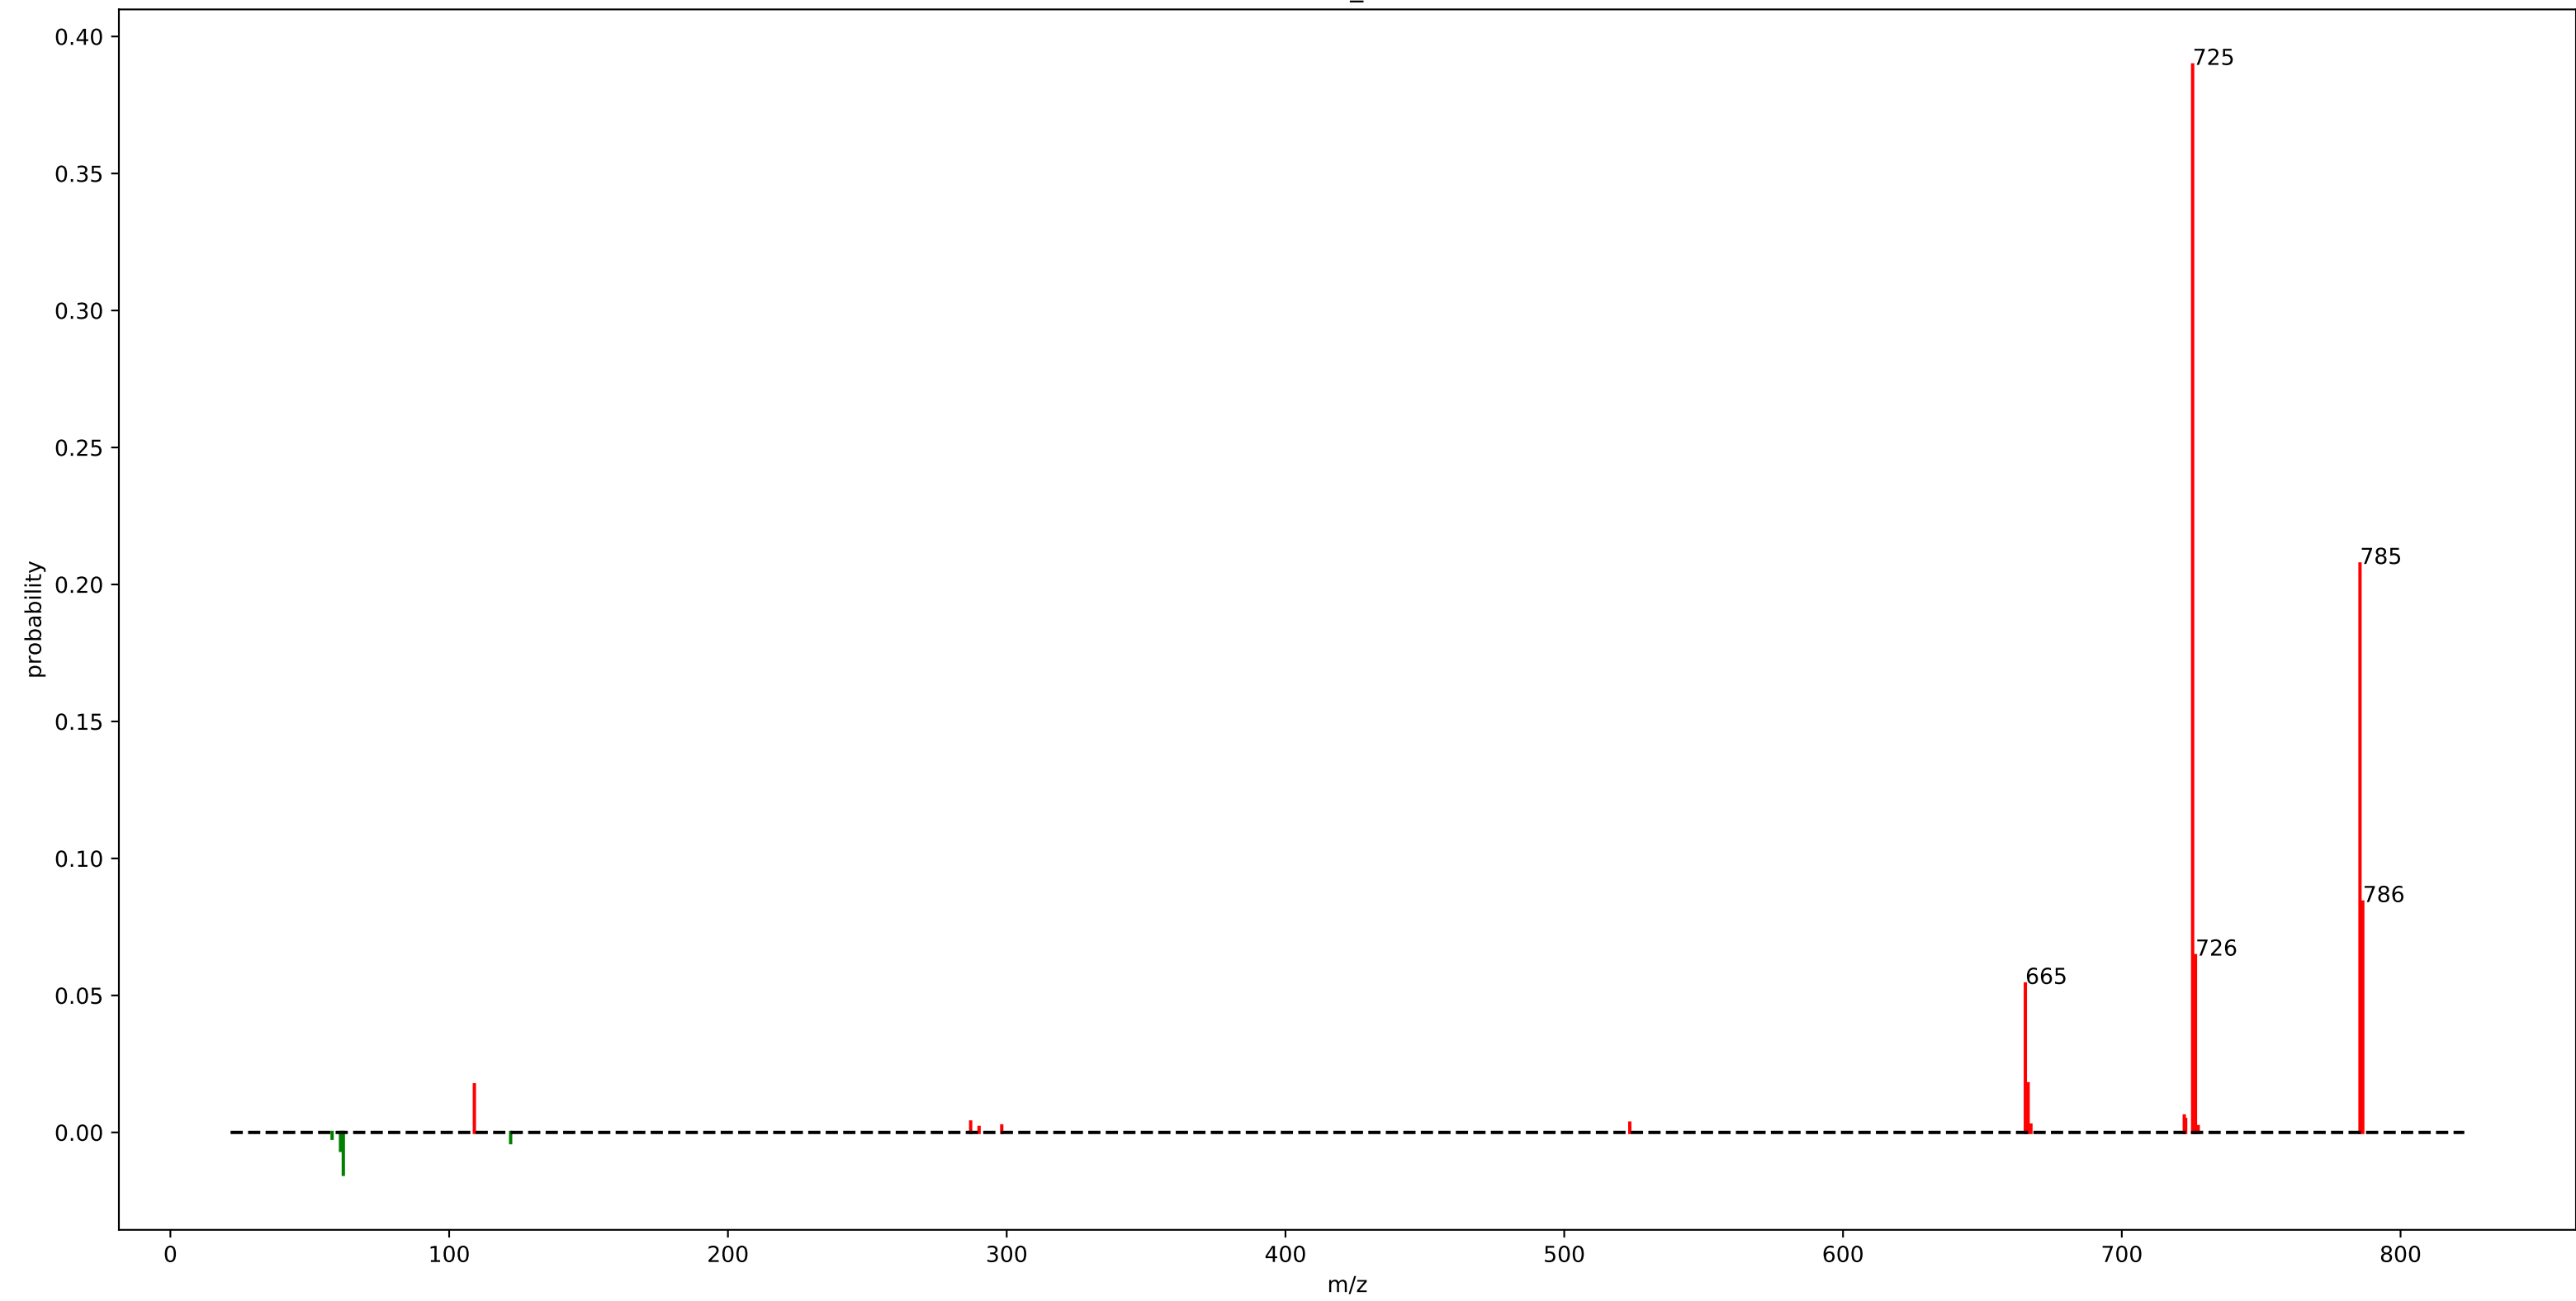

## motif\_578

|                   |        |
|-------------------|--------|
| fragment_725.4225 | : 0.39 |
| fragment_785.4475 | : 0.21 |
| fragment_786.4475 | : 0.08 |
| fragment_726.4275 | : 0.06 |
| fragment_665.4025 | : 0.05 |
| fragment_666.4075 | : 0.02 |
| fragment_109.0425 | : 0.02 |
| loss_62.0325      | : 0.02 |
| loss_61.0325      | : 0.01 |
| fragment_722.4175 | : 0.01 |

rhabdus\_motif\_122.m2m

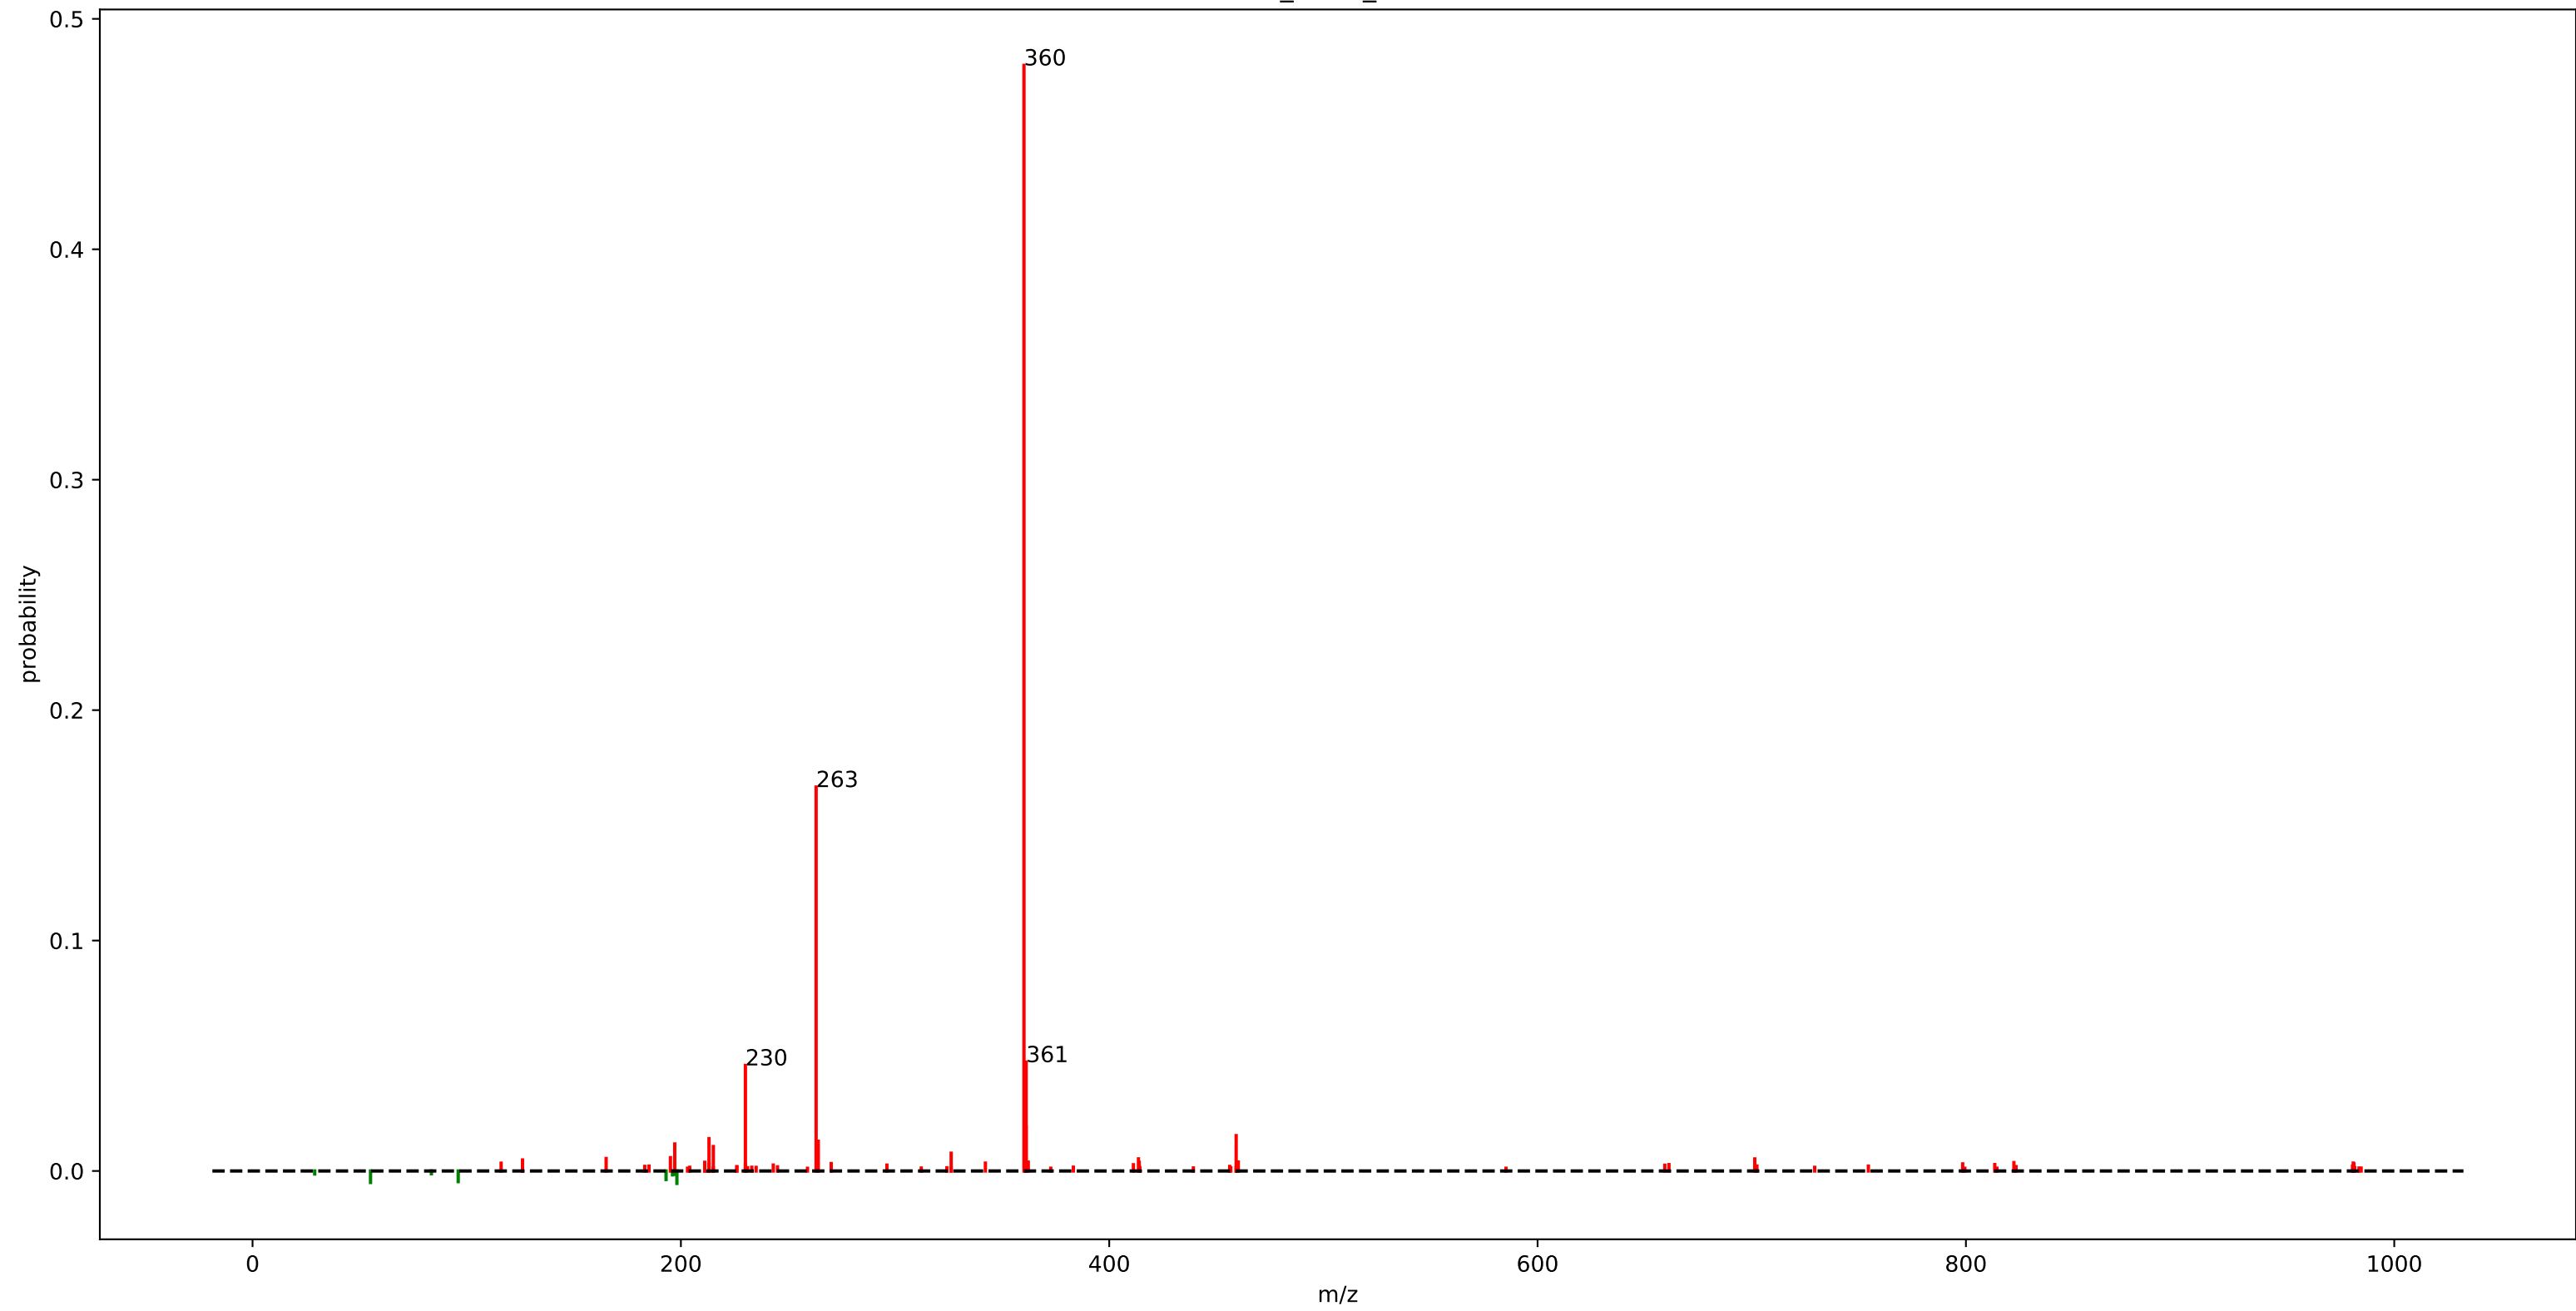

## rhabdus\_motif\_122.m2m

|                   |        |
|-------------------|--------|
| fragment_360.1925 | : 0.48 |
| fragment_263.1375 | : 0.17 |
| fragment_361.1975 | : 0.05 |
| fragment_230.1225 | : 0.05 |
| fragment_361.1925 | : 0.02 |
| fragment_459.2625 | : 0.02 |
| fragment_213.1275 | : 0.01 |
| fragment_264.1425 | : 0.01 |
| fragment_197.1275 | : 0.01 |
| fragment_215.1375 | : 0.01 |
| fragment_326.2025 | : 0.01 |
| fragment_195.1125 | : 0.01 |
| fragment_165.1025 | : 0.01 |
| loss_198.1375     | : 0.01 |
| fragment_413.6475 | : 0.01 |
| fragment_701.4075 | : 0.01 |



motif\_399

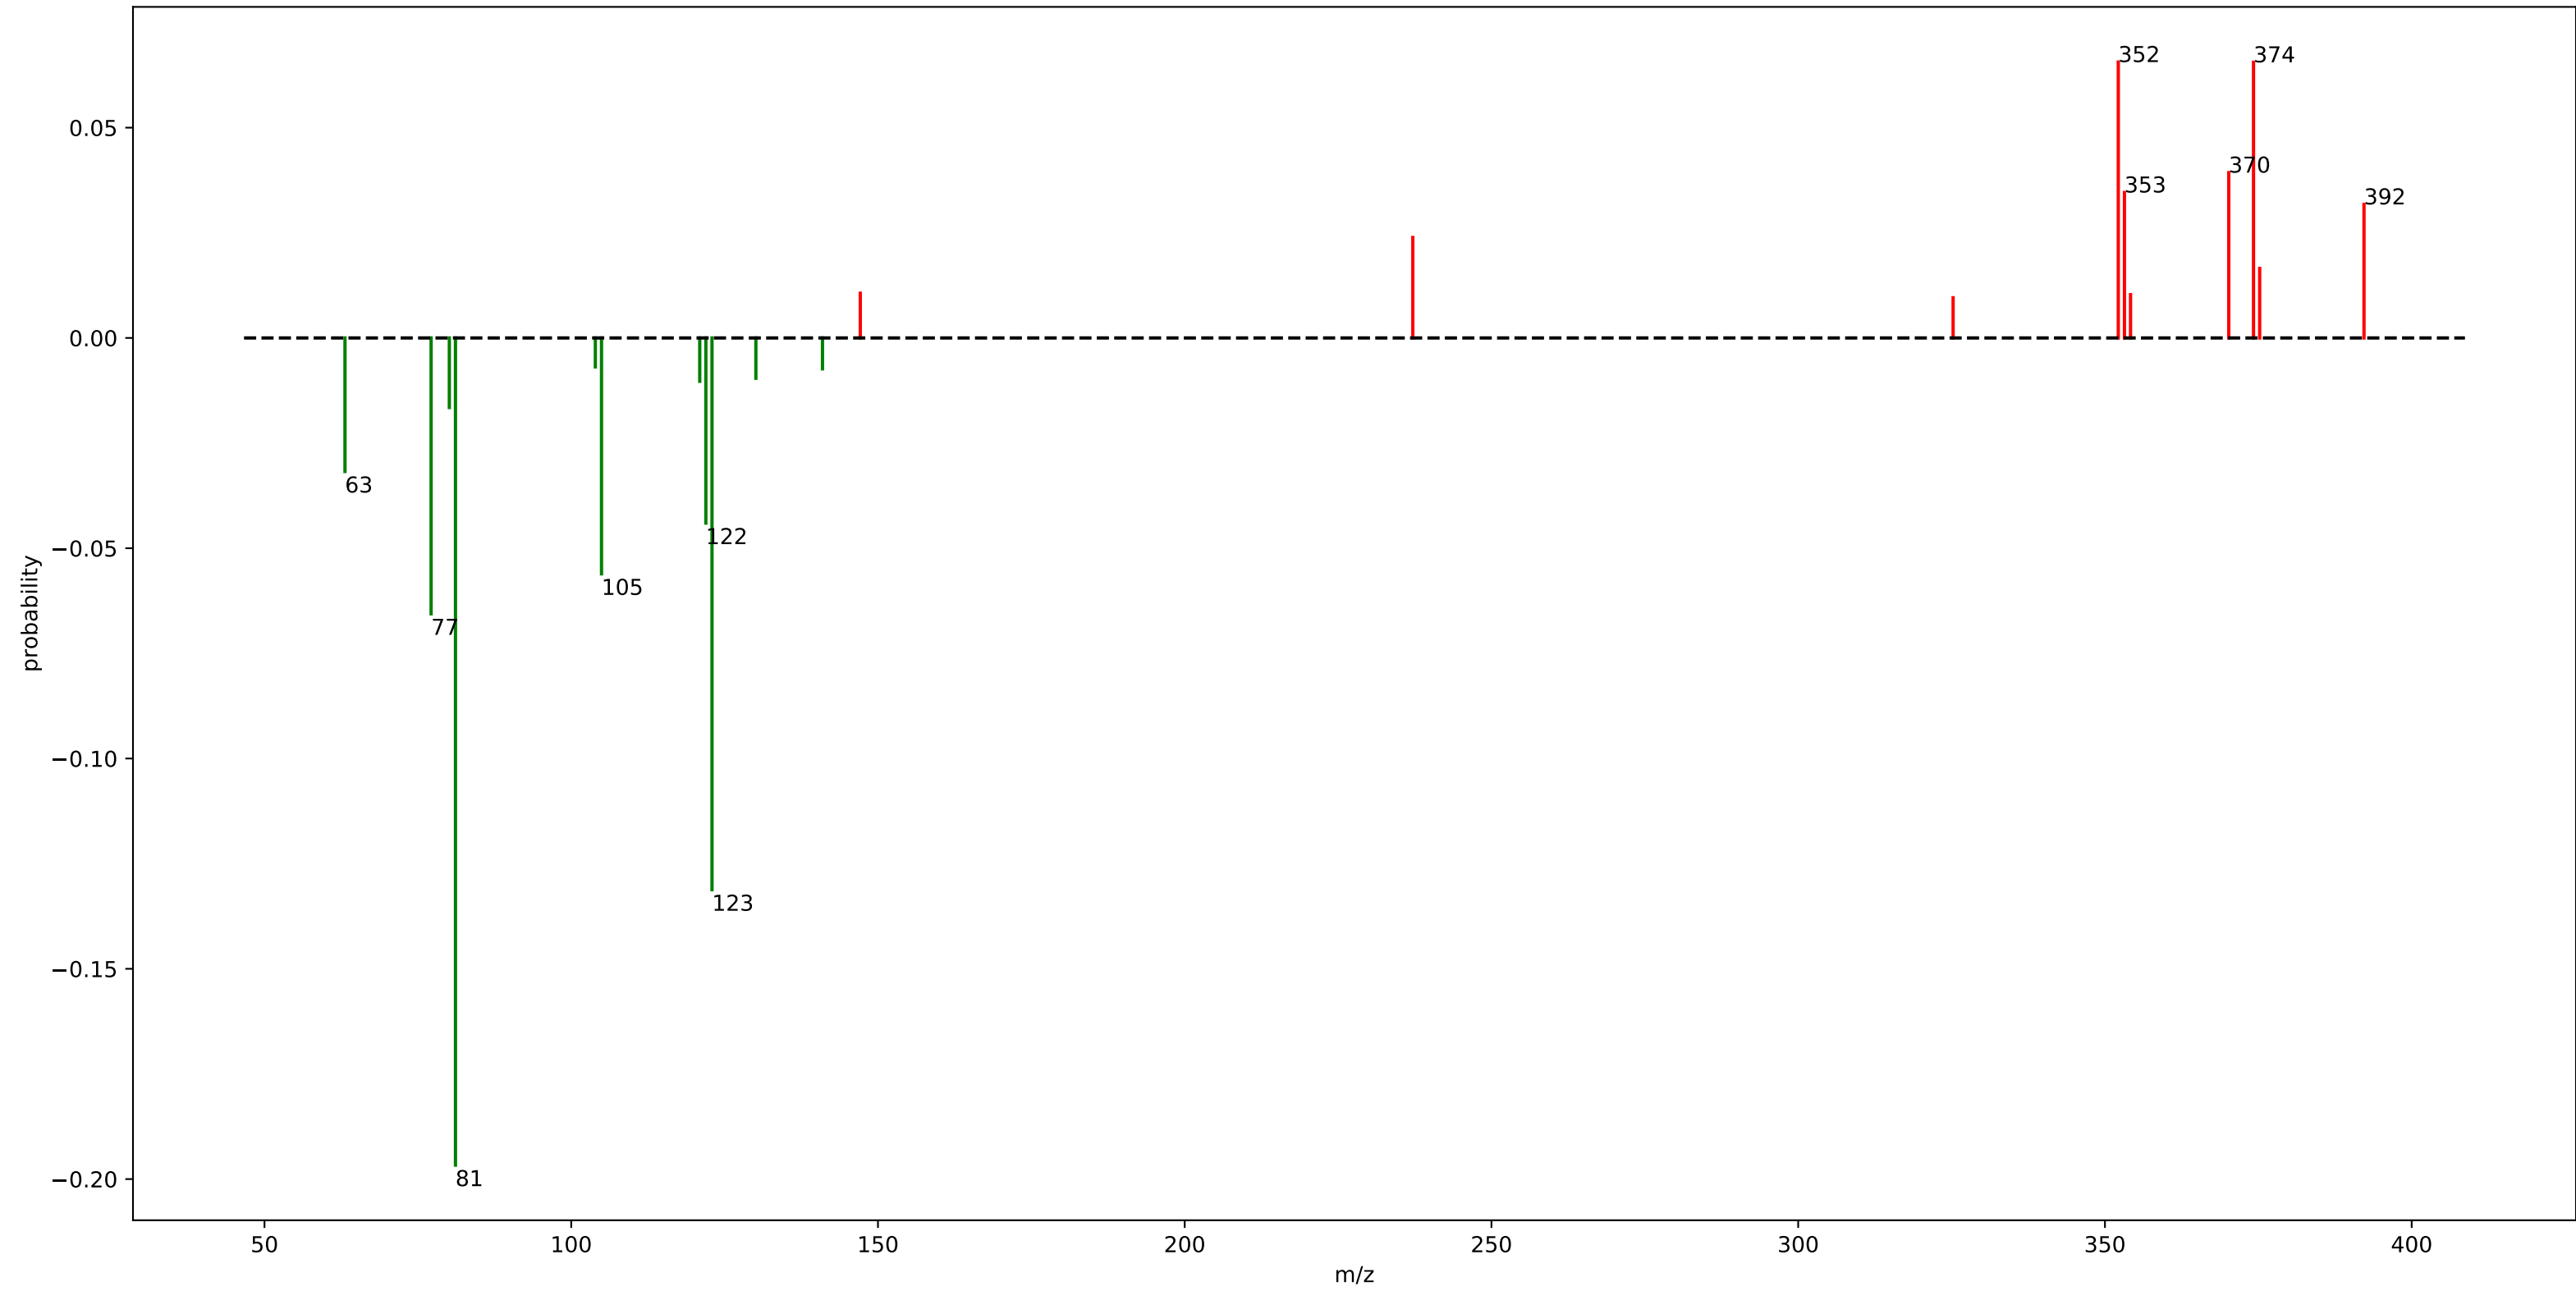

## motif\_399

|                   |        |               |        |
|-------------------|--------|---------------|--------|
| loss_81.1325      | : 0.20 | loss_103.9325 | : 0.01 |
| loss_122.9475     | : 0.13 |               |        |
| fragment_352.1775 | : 0.07 |               |        |
| loss_77.1625      | : 0.07 |               |        |
| fragment_374.2175 | : 0.07 |               |        |
| loss_104.9375     | : 0.06 |               |        |
| loss_121.9475     | : 0.04 |               |        |
| fragment_370.1875 | : 0.04 |               |        |
| fragment_353.1775 | : 0.03 |               |        |
| fragment_392.2275 | : 0.03 |               |        |
| loss_63.1225      | : 0.03 |               |        |
| fragment_237.1825 | : 0.02 |               |        |
| fragment_375.2225 | : 0.02 |               |        |
| loss_80.1325      | : 0.02 |               |        |
| fragment_147.1175 | : 0.01 |               |        |
| fragment_354.1725 | : 0.01 |               |        |
| loss_120.9475     | : 0.01 |               |        |
| loss_130.0975     | : 0.01 |               |        |
| fragment_325.2525 | : 0.01 |               |        |
| loss_140.9575     | : 0.01 |               |        |

motif\_398

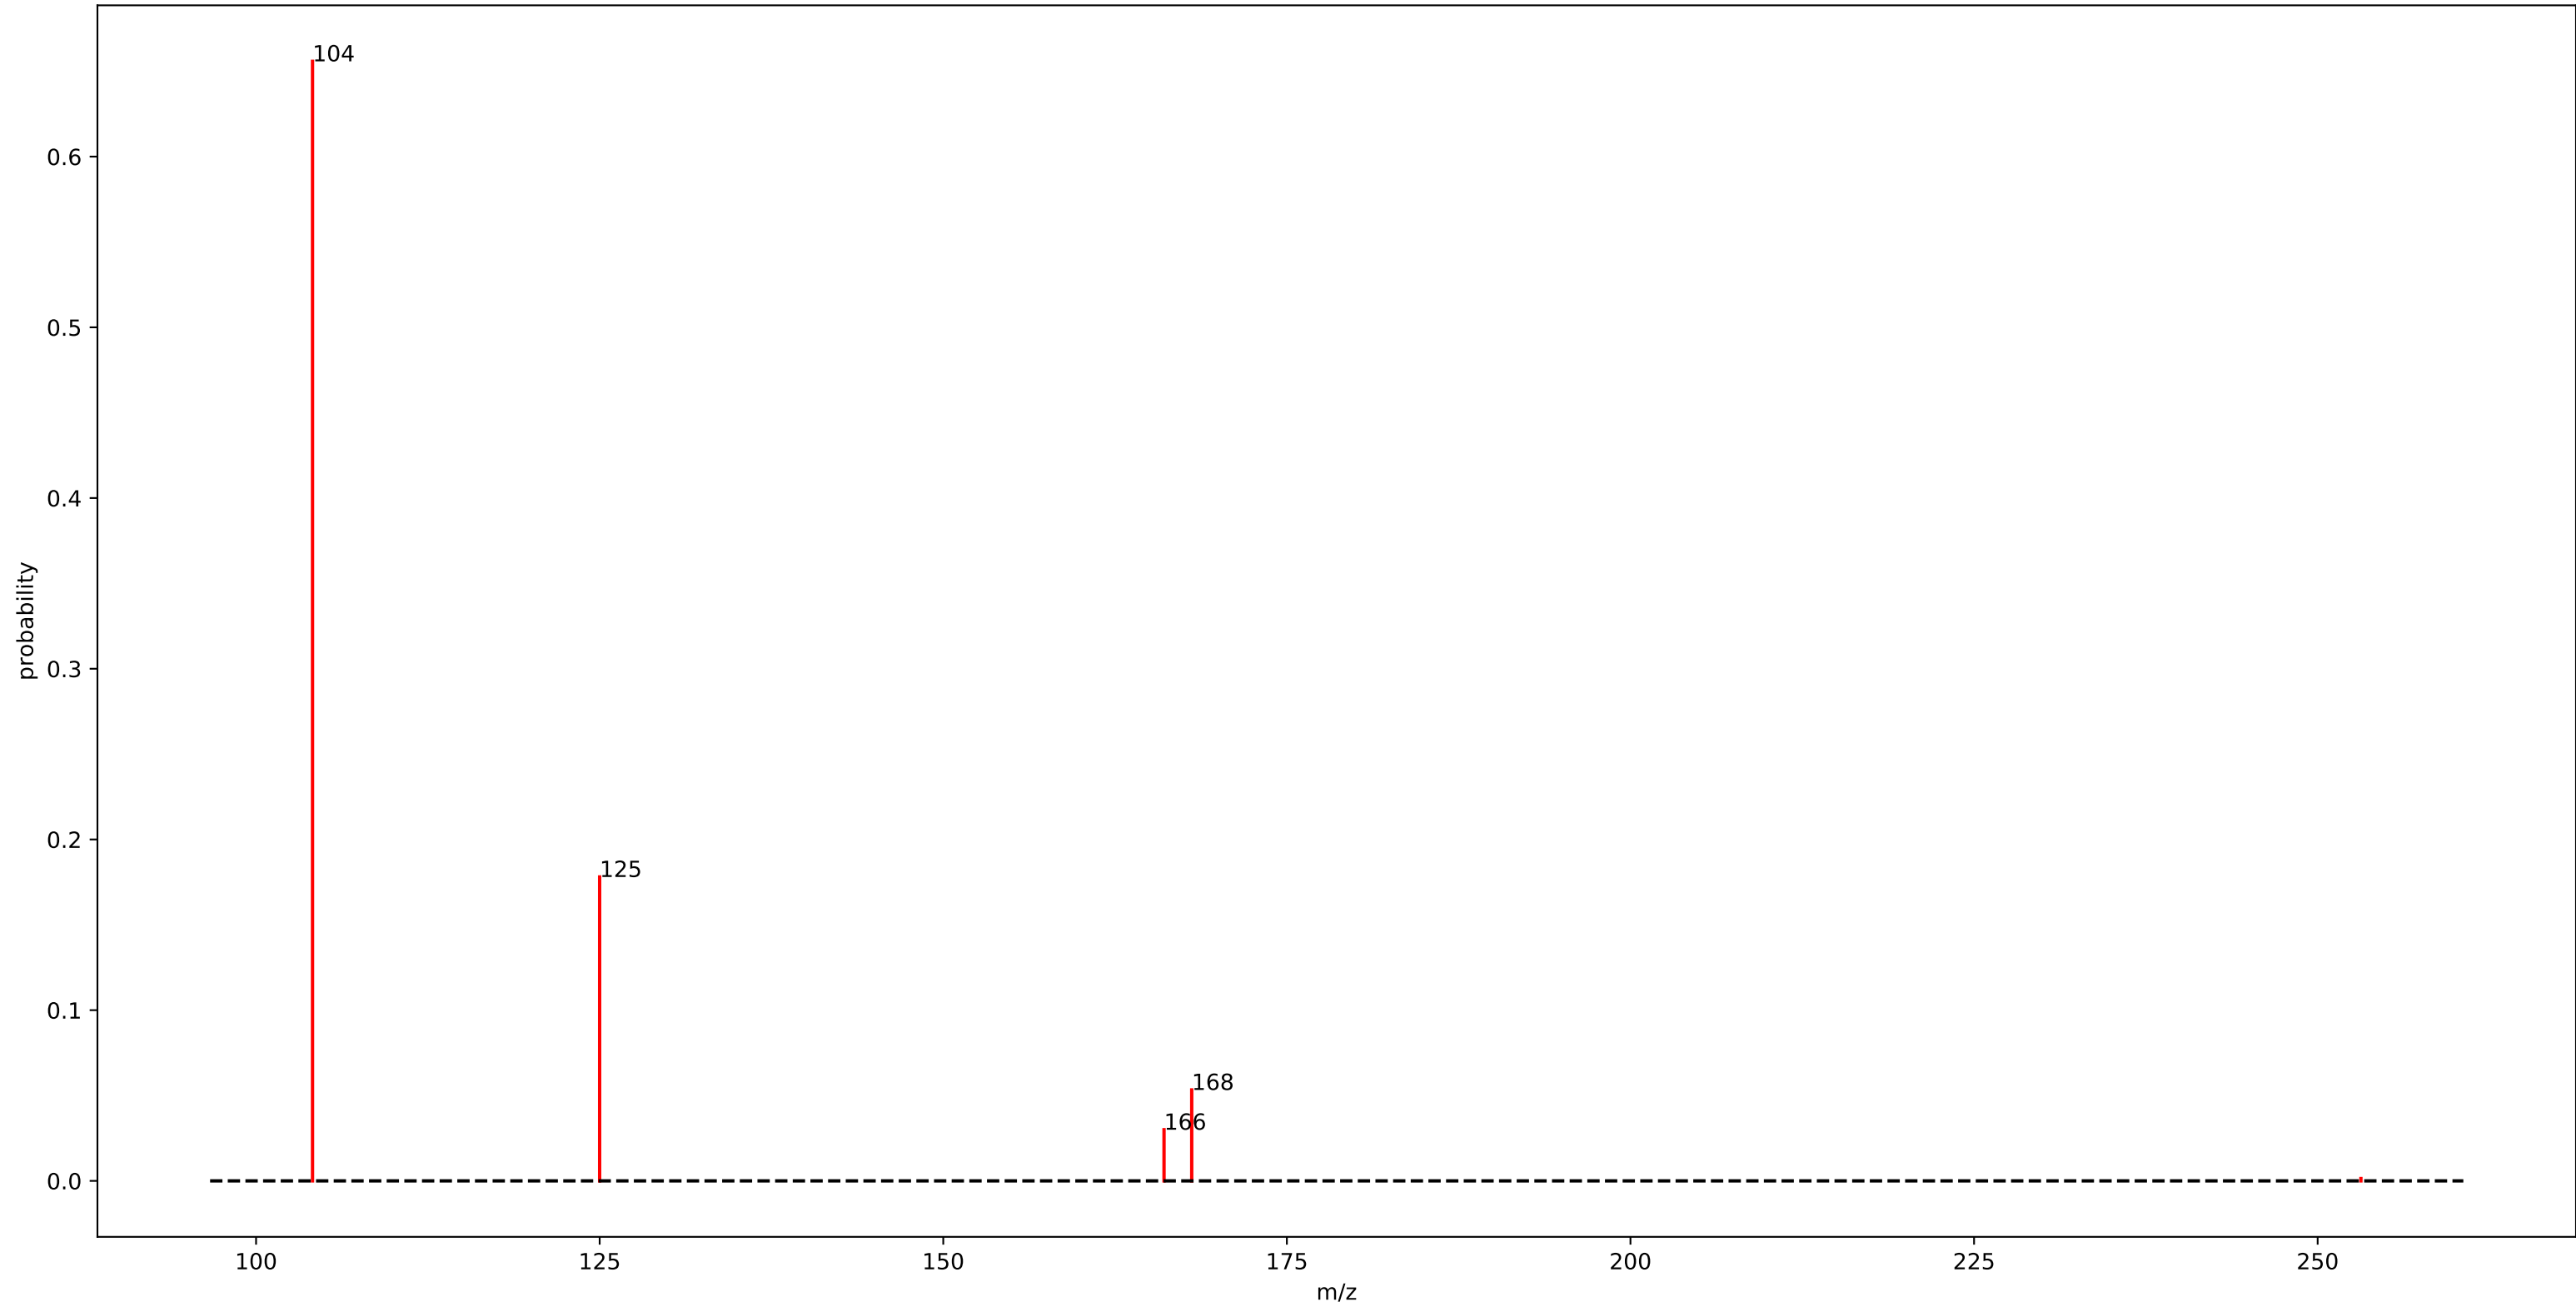

## motif\_398

|                   |        |
|-------------------|--------|
| fragment_104.1075 | : 0.66 |
| fragment_124.9975 | : 0.18 |
| fragment_168.0775 | : 0.05 |
| fragment_166.0625 | : 0.03 |

urine\_mass2motif\_90.m2m

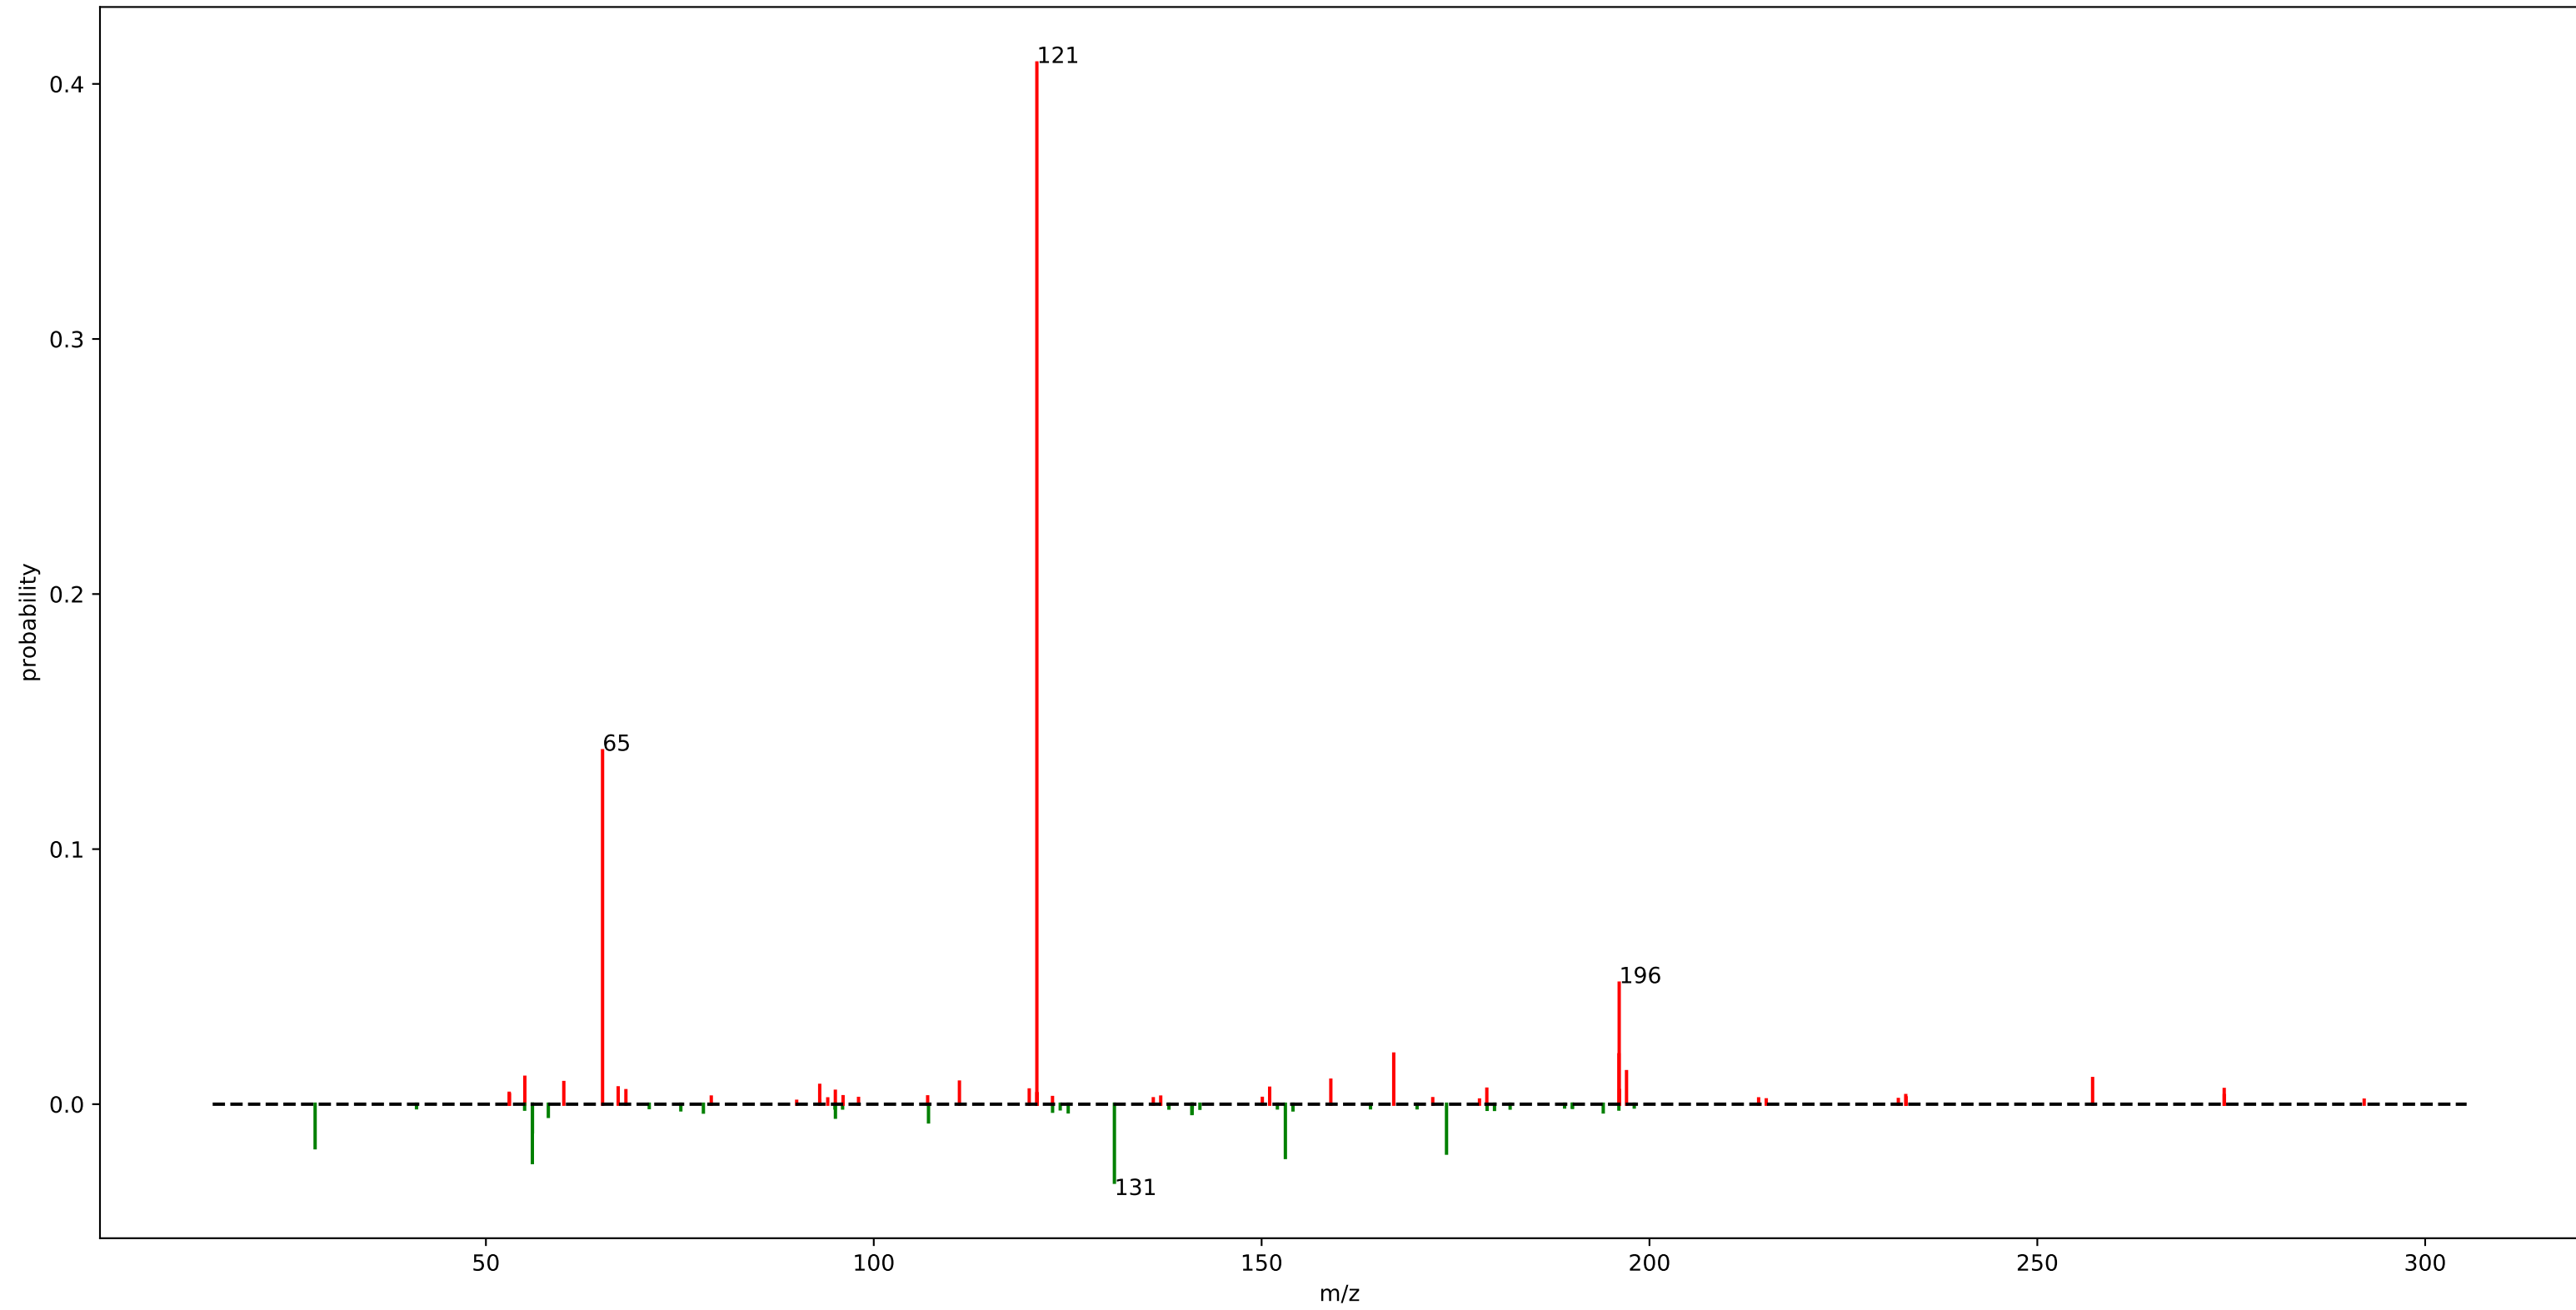

## urine\_mass2motif\_90.m2m

|                   |        |                   |        |
|-------------------|--------|-------------------|--------|
| fragment_121.0275 | : 0.41 | fragment_151.0375 | : 0.01 |
| fragment_65.0375  | : 0.14 | fragment_179.0325 | : 0.01 |
| fragment_196.0975 | : 0.05 | fragment_274.0925 | : 0.01 |
| loss_131.0225     | : 0.03 | fragment_120.0425 | : 0.01 |
| loss_55.9875      | : 0.02 | fragment_196.1325 | : 0.01 |
| loss_153.0625     | : 0.02 | fragment_68.0475  | : 0.01 |
| fragment_167.0325 | : 0.02 | loss_95.0575      | : 0.01 |
| fragment_196.0625 | : 0.02 | fragment_95.0475  | : 0.01 |
| loss_173.8375     | : 0.02 |                   |        |
| loss_27.9825      | : 0.02 |                   |        |
| fragment_197.0425 | : 0.01 |                   |        |
| loss_56.0025      | : 0.01 |                   |        |
| fragment_55.0175  | : 0.01 |                   |        |
| fragment_257.1275 | : 0.01 |                   |        |
| fragment_158.9225 | : 0.01 |                   |        |
| fragment_111.0425 | : 0.01 |                   |        |
| fragment_60.0425  | : 0.01 |                   |        |
| fragment_93.0325  | : 0.01 |                   |        |
| loss_107.0575     | : 0.01 |                   |        |
| fragment_67.0525  | : 0.01 |                   |        |

motif\_395

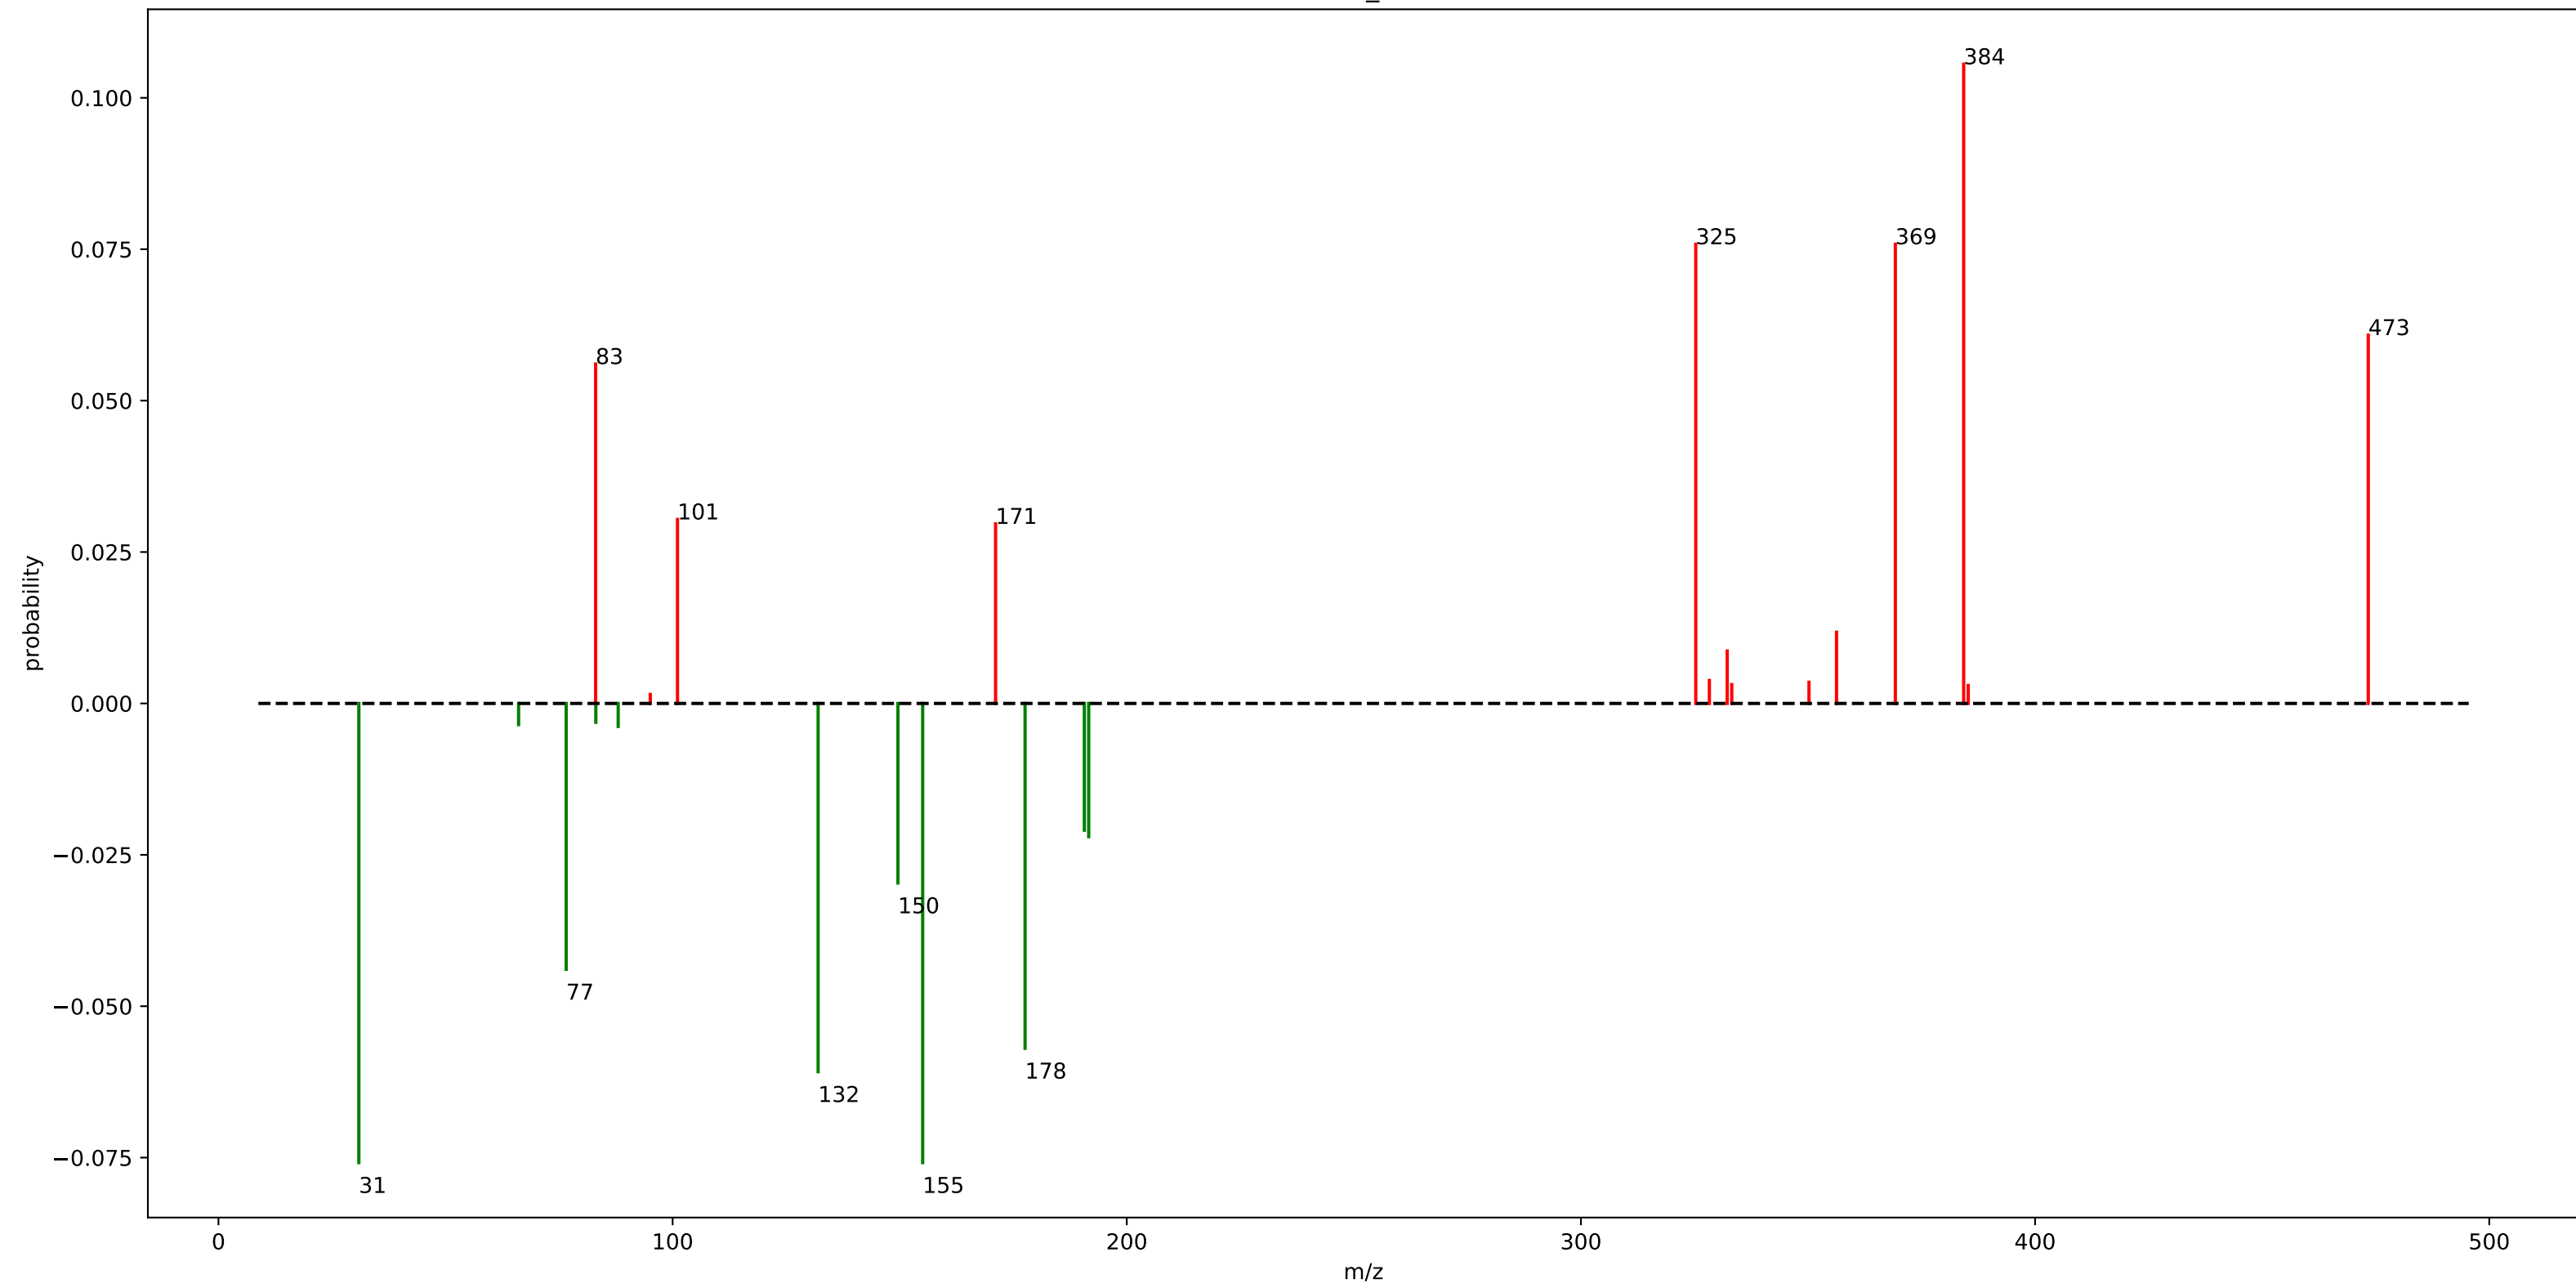

## motif\_395

|                   |        |
|-------------------|--------|
| fragment_384.2725 | : 0.11 |
| fragment_369.2275 | : 0.08 |
| loss_30.9125      | : 0.08 |
| fragment_325.2825 | : 0.08 |
| loss_155.0575     | : 0.08 |
| fragment_473.3625 | : 0.06 |
| loss_132.0375     | : 0.06 |
| loss_177.6025     | : 0.06 |
| fragment_83.0475  | : 0.06 |
| loss_76.5575      | : 0.04 |
| fragment_101.0725 | : 0.03 |
| loss_149.6125     | : 0.03 |
| fragment_171.1125 | : 0.03 |
| loss_191.6175     | : 0.02 |
| loss_190.6575     | : 0.02 |
| fragment_356.2775 | : 0.01 |
| fragment_332.2075 | : 0.01 |



motif\_394

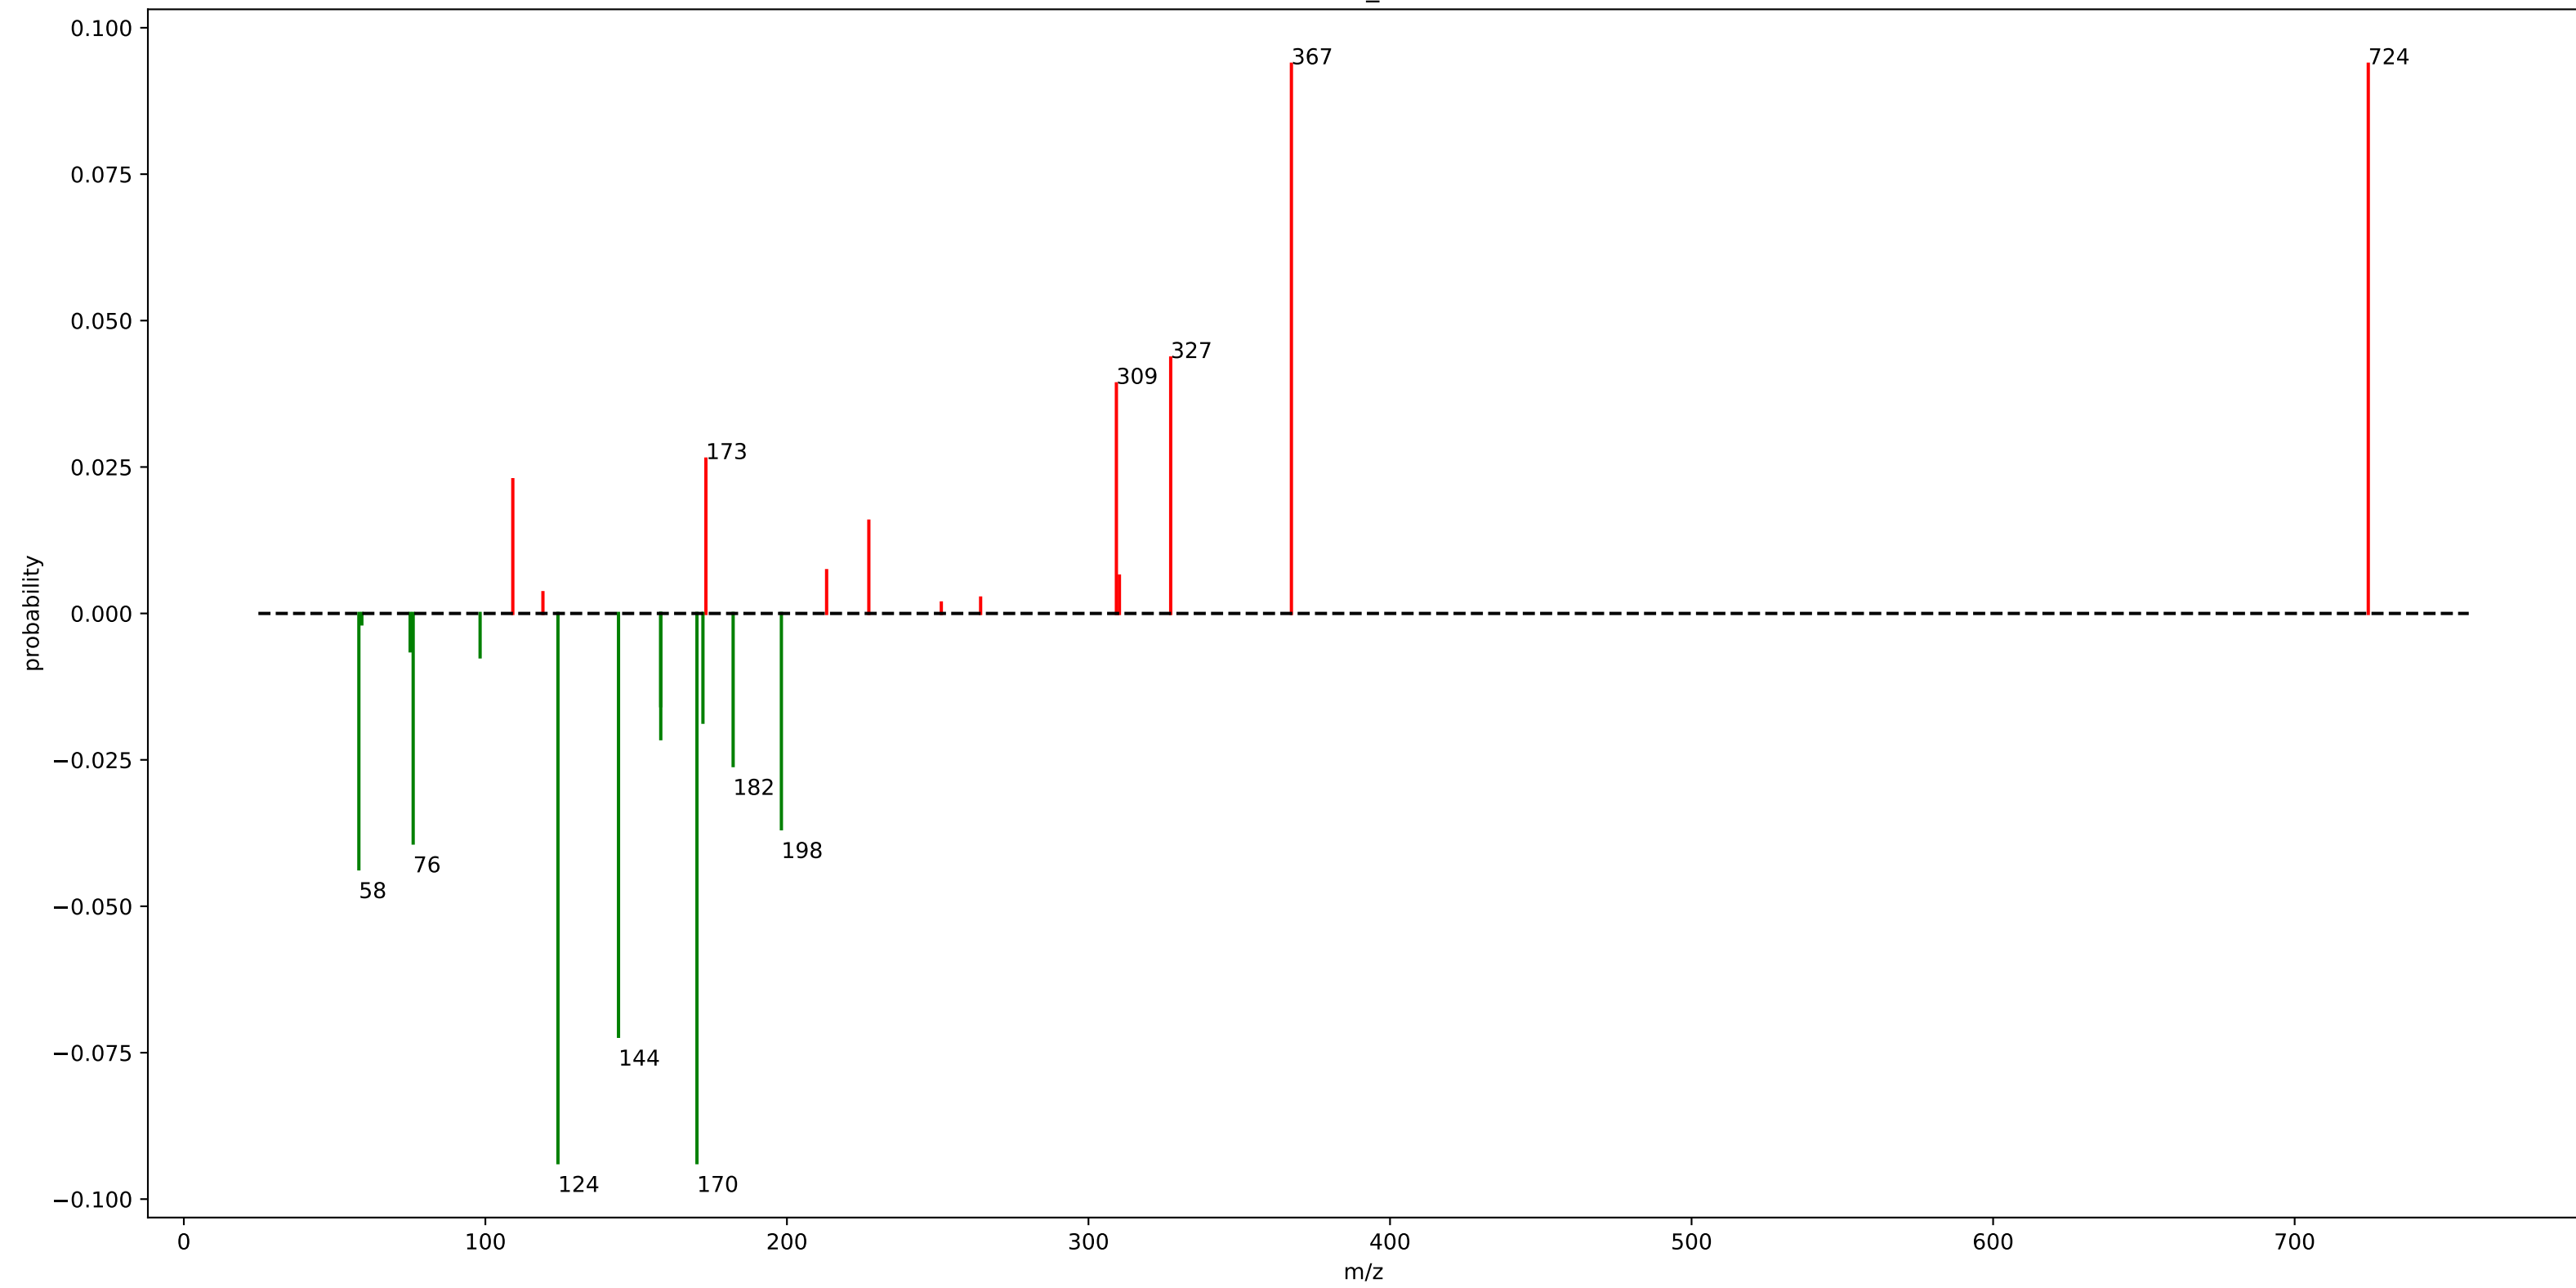

## motif\_394

|                   |        |                   |        |
|-------------------|--------|-------------------|--------|
| fragment_367.2975 | : 0.09 | fragment_310.2625 | : 0.01 |
| loss_124.0675     | : 0.09 |                   |        |
| fragment_724.4125 | : 0.09 |                   |        |
| loss_170.1625     | : 0.09 |                   |        |
| loss_144.1475     | : 0.07 |                   |        |
| loss_58.0425      | : 0.04 |                   |        |
| fragment_327.2675 | : 0.04 |                   |        |
| fragment_309.2575 | : 0.04 |                   |        |
| loss_76.0525      | : 0.04 |                   |        |
| loss_198.1625     | : 0.04 |                   |        |
| fragment_173.1325 | : 0.03 |                   |        |
| loss_182.1625     | : 0.03 |                   |        |
| fragment_109.0975 | : 0.02 |                   |        |
| loss_158.1625     | : 0.02 |                   |        |
| loss_172.1475     | : 0.02 |                   |        |
| fragment_227.1625 | : 0.02 |                   |        |
| loss_158.1425     | : 0.02 |                   |        |
| loss_98.2475      | : 0.01 |                   |        |
| fragment_213.1625 | : 0.01 |                   |        |
| loss_75.0475      | : 0.01 |                   |        |

motif\_397

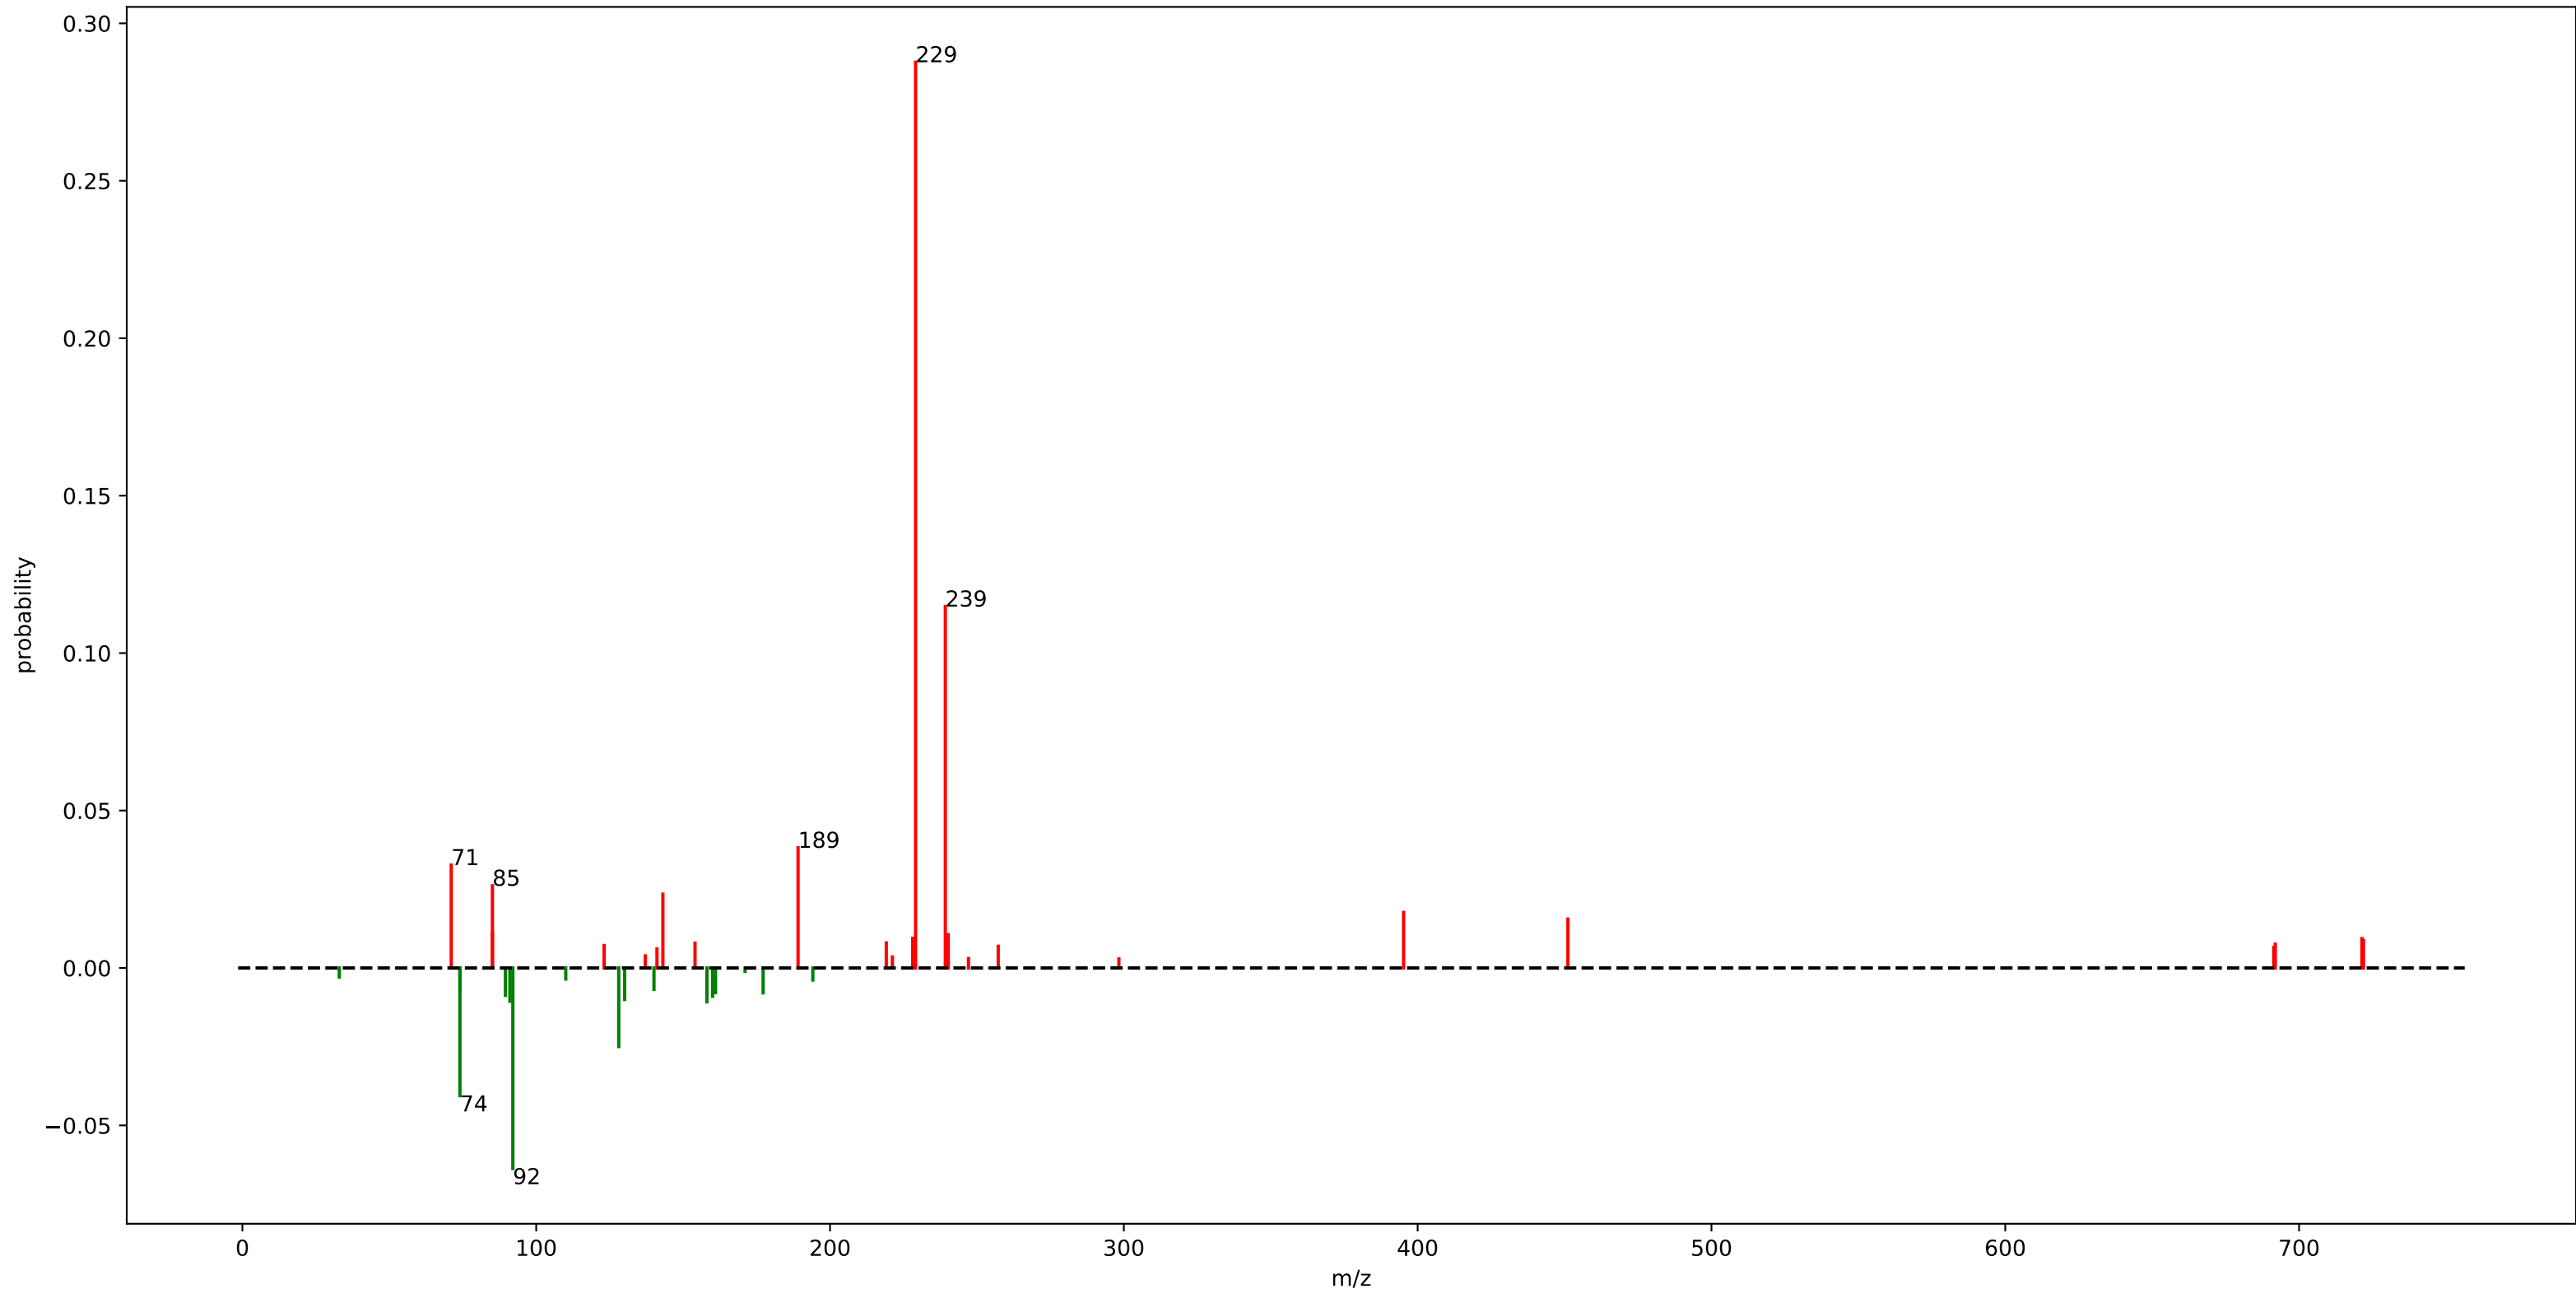

## motif\_397

|                   |        |                   |        |
|-------------------|--------|-------------------|--------|
| fragment_229.1175 | : 0.29 | fragment_721.9125 | : 0.01 |
| fragment_239.2375 | : 0.11 | fragment_219.1475 | : 0.01 |
| loss_92.0475      | : 0.06 | loss_177.2325     | : 0.01 |
| loss_74.0325      | : 0.04 | fragment_154.0475 | : 0.01 |
| fragment_189.1225 | : 0.04 | loss_161.0325     | : 0.01 |
| fragment_71.0825  | : 0.03 | fragment_691.8975 | : 0.01 |
| fragment_85.0975  | : 0.03 | fragment_123.1175 | : 0.01 |
| loss_128.0925     | : 0.02 | fragment_257.2475 | : 0.01 |
| fragment_143.1075 | : 0.02 | loss_74.0375      | : 0.01 |
| fragment_395.2175 | : 0.02 | loss_140.0775     | : 0.01 |
| fragment_451.1425 | : 0.02 | fragment_691.3975 | : 0.01 |
| fragment_85.1025  | : 0.01 | fragment_141.1025 | : 0.01 |
| loss_158.1025     | : 0.01 |                   |        |
| fragment_240.2375 | : 0.01 |                   |        |
| loss_91.0425      | : 0.01 |                   |        |
| loss_130.1075     | : 0.01 |                   |        |
| fragment_228.1325 | : 0.01 |                   |        |
| fragment_721.4075 | : 0.01 |                   |        |
| loss_160.0475     | : 0.01 |                   |        |
| loss_89.5225      | : 0.01 |                   |        |

motif\_396

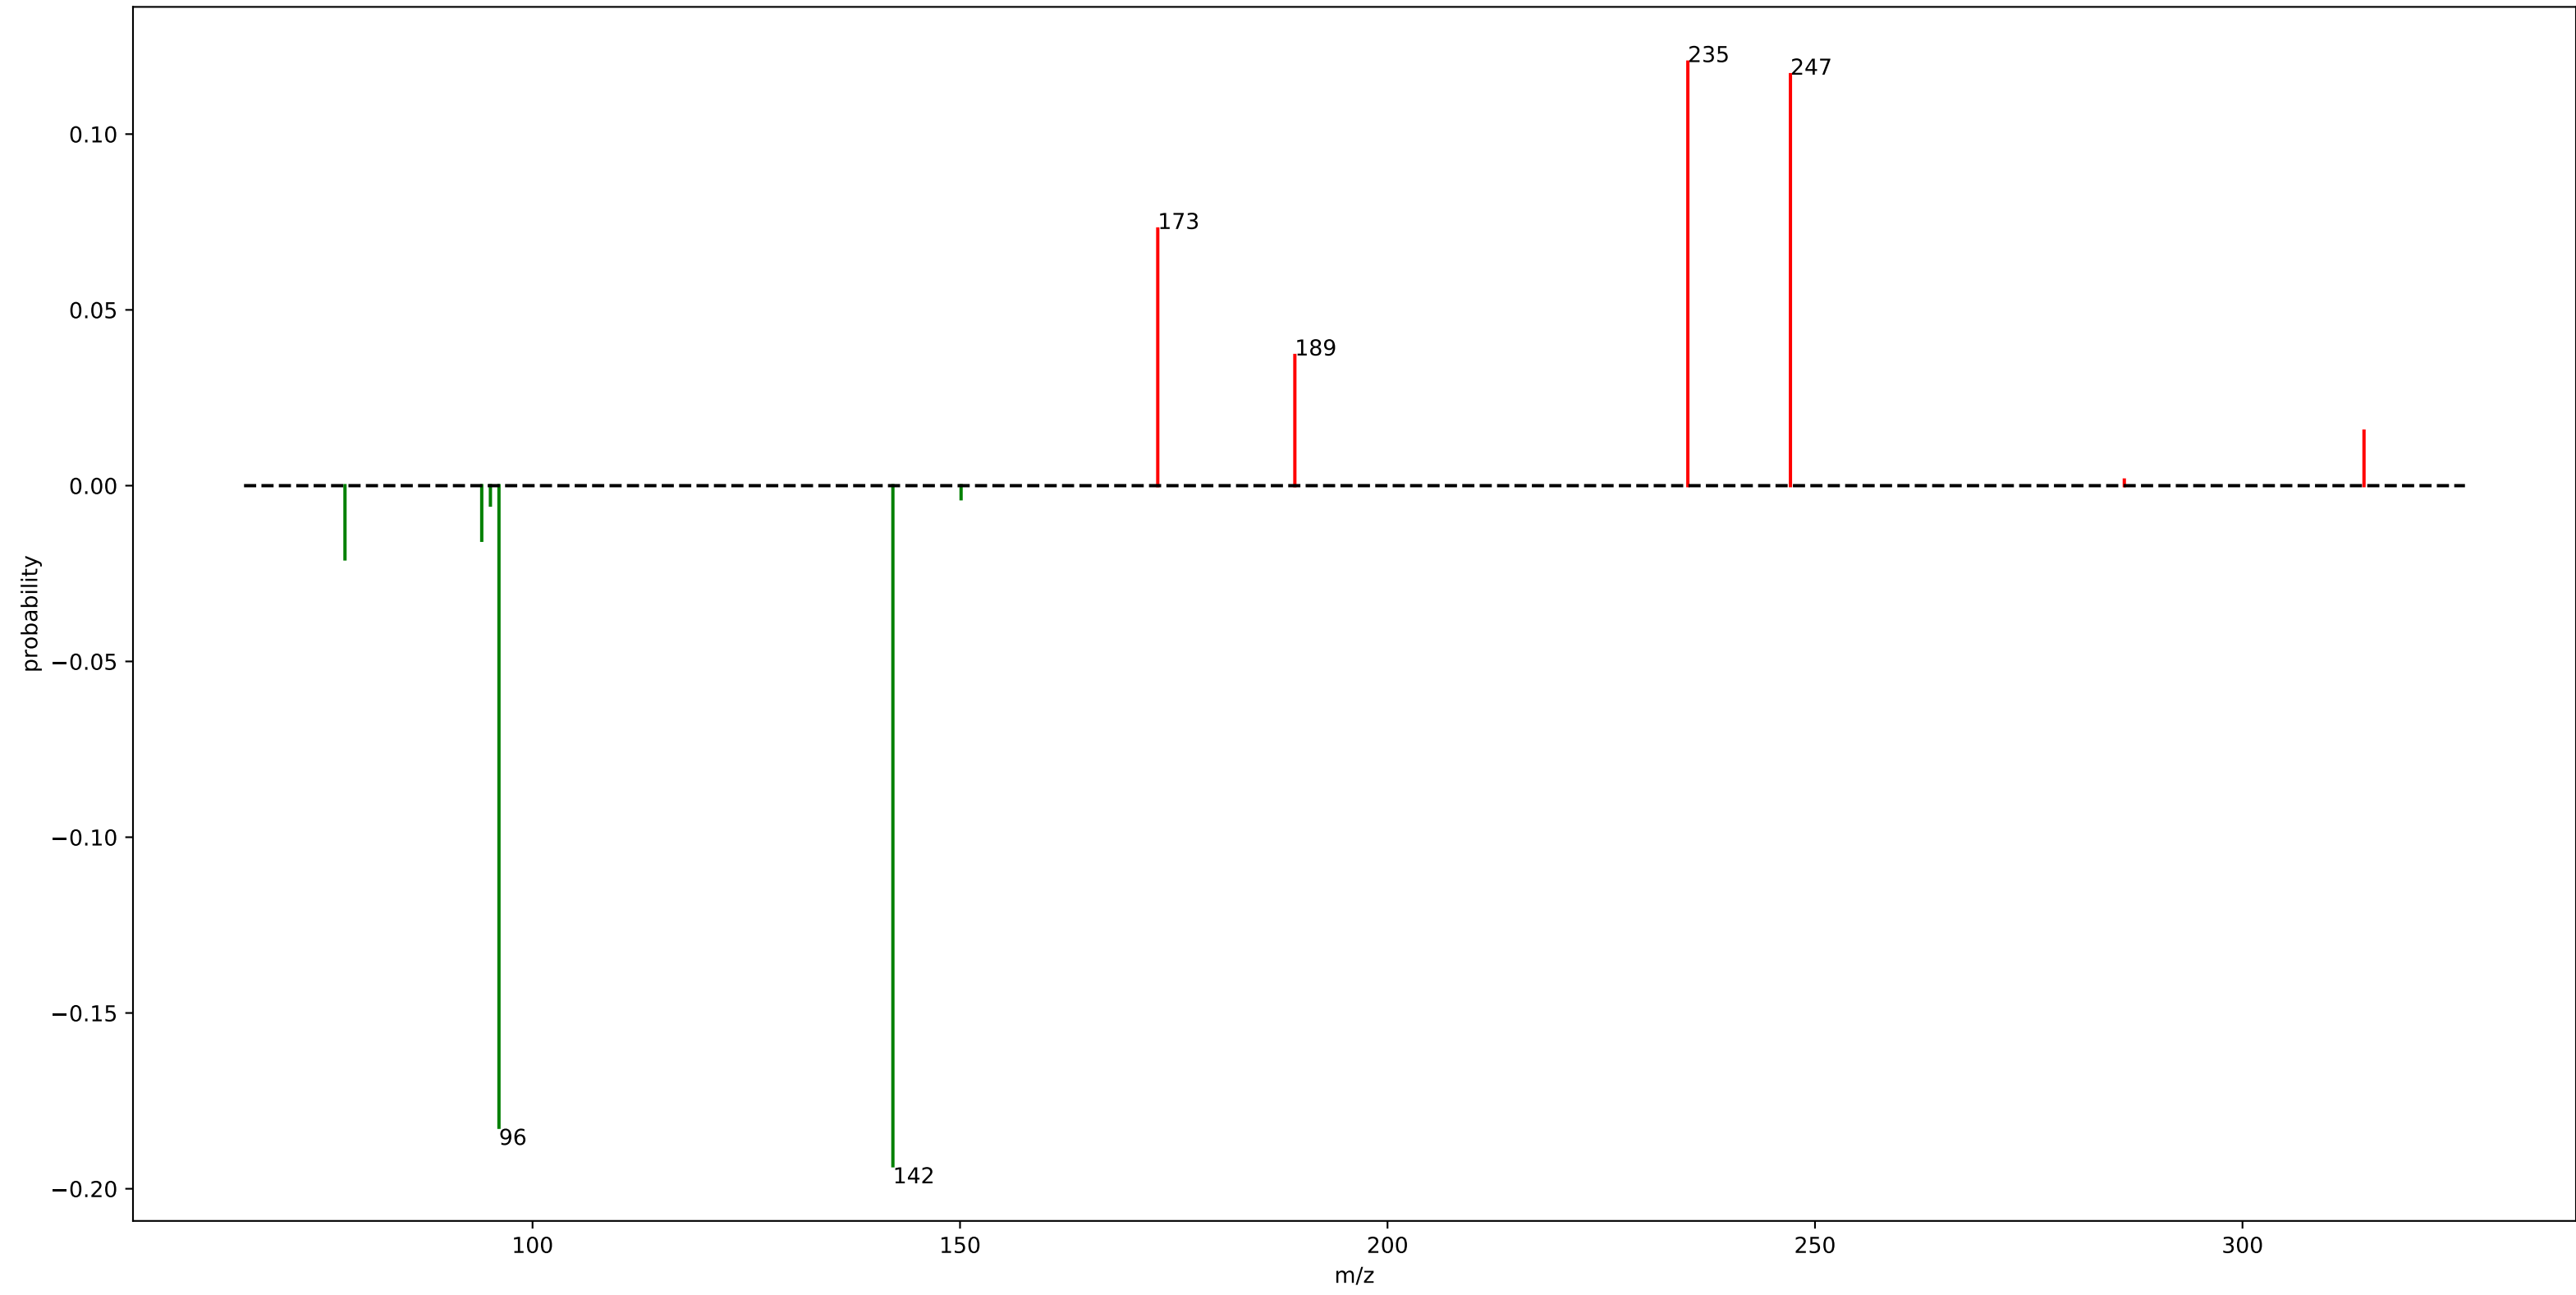

## motif\_396

|                   |        |
|-------------------|--------|
| loss_142.1475     | : 0.19 |
| loss_96.0725      | : 0.18 |
| fragment_235.1275 | : 0.12 |
| fragment_247.1275 | : 0.12 |
| fragment_173.1275 | : 0.07 |
| fragment_189.1625 | : 0.04 |
| loss_78.0625      | : 0.02 |
| loss_94.0575      | : 0.02 |
| fragment_314.2125 | : 0.02 |
| loss_95.0725      | : 0.01 |

motif\_391

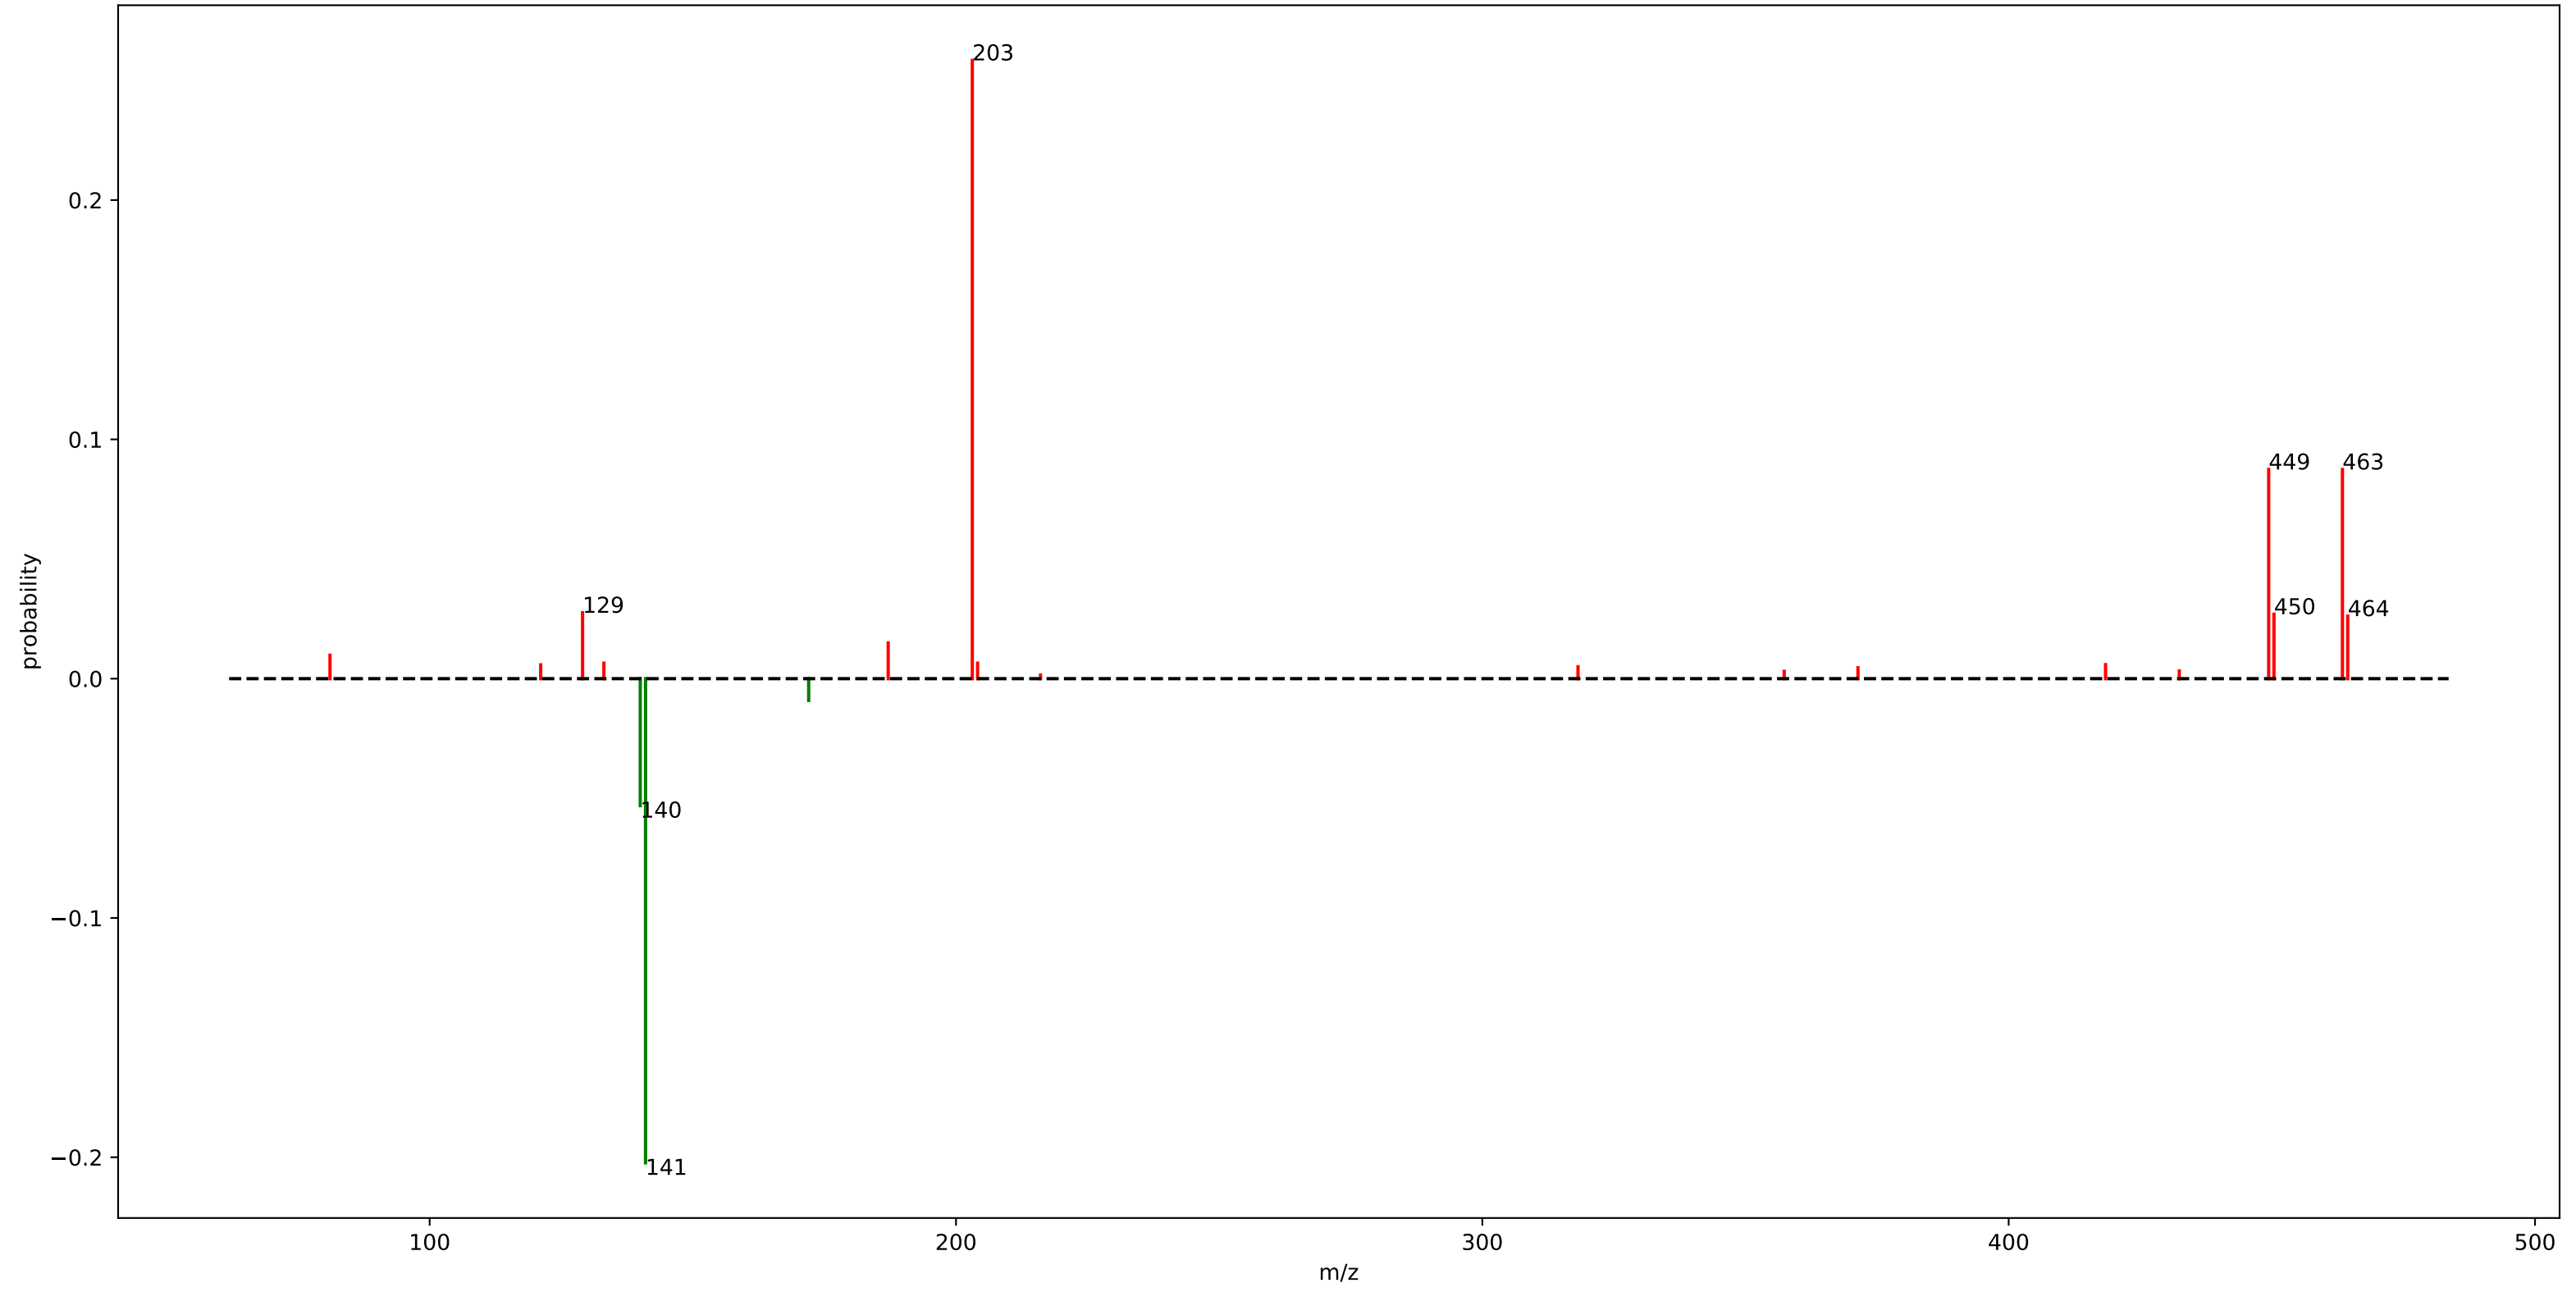

## motif\_391

|                   |        |
|-------------------|--------|
| fragment_203.1025 | : 0.26 |
| loss_141.0175     | : 0.20 |
| fragment_449.3975 | : 0.09 |
| fragment_463.4125 | : 0.09 |
| loss_140.0125     | : 0.05 |
| fragment_129.0525 | : 0.03 |
| fragment_450.4025 | : 0.03 |
| fragment_464.4175 | : 0.03 |
| fragment_187.1225 | : 0.01 |
| fragment_81.0675  | : 0.01 |
| loss_172.0125     | : 0.01 |
| fragment_204.1025 | : 0.01 |
| fragment_133.1025 | : 0.01 |
| fragment_418.4025 | : 0.01 |
| fragment_121.0975 | : 0.01 |



motif\_390

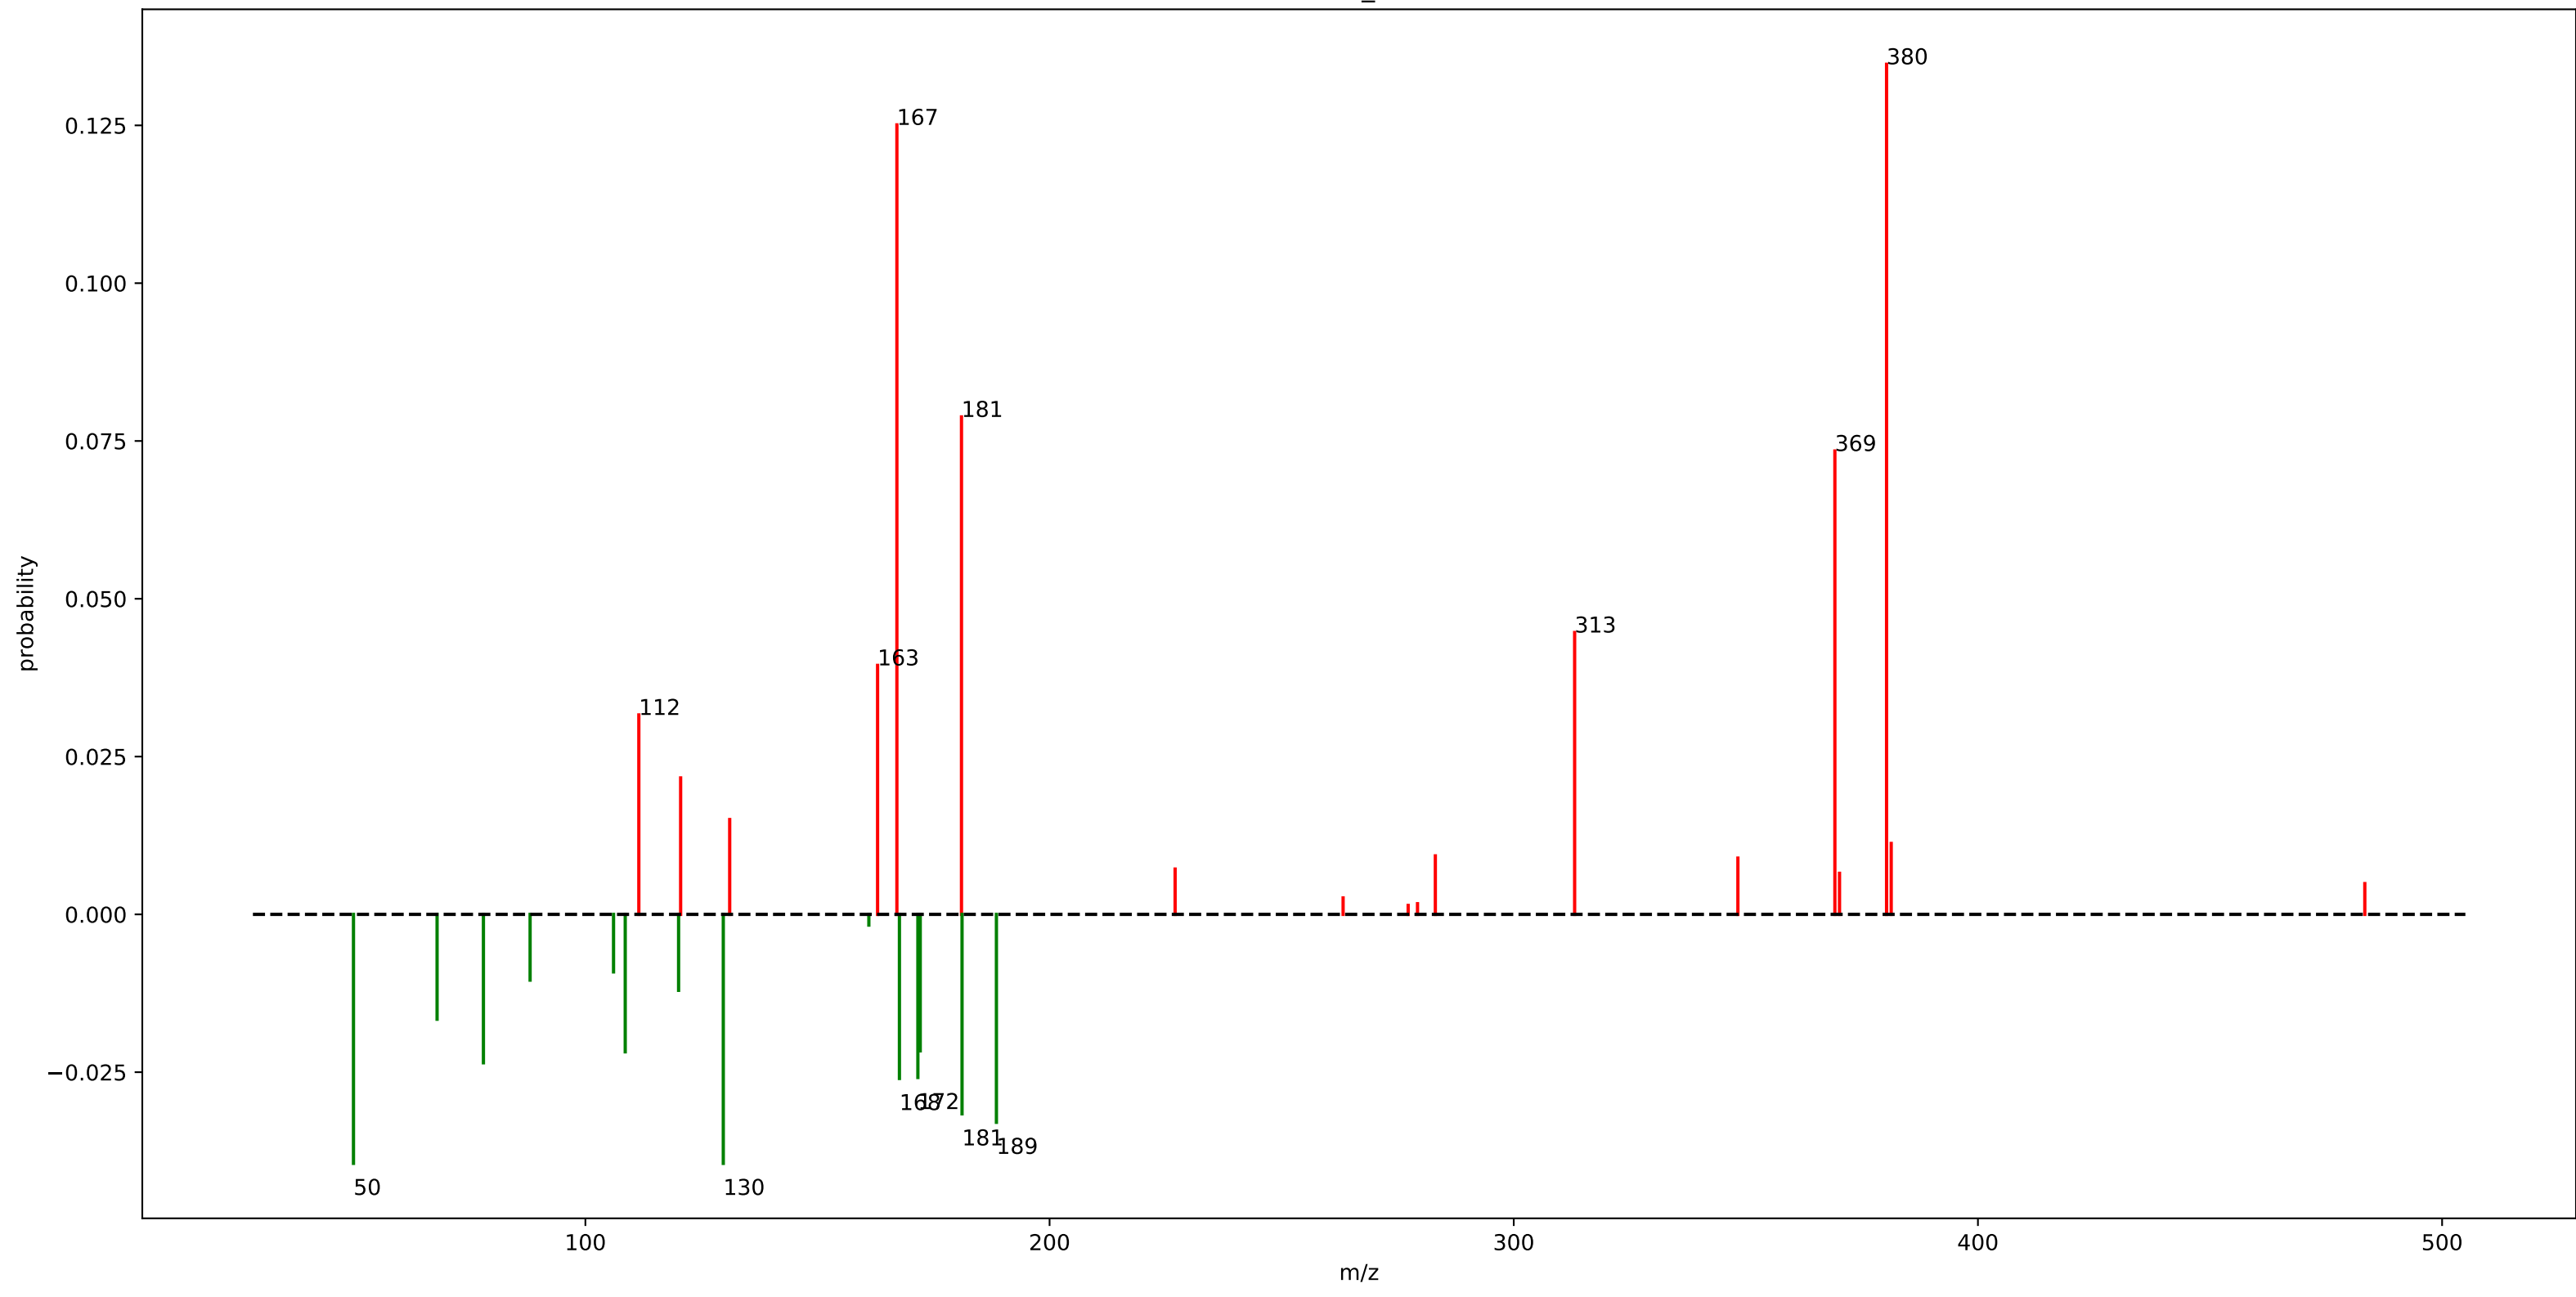

## motif\_390

|                   |        |                   |        |
|-------------------|--------|-------------------|--------|
| fragment_380.3175 | : 0.13 | fragment_381.3175 | : 0.01 |
| fragment_167.1075 | : 0.13 | loss_88.0875      | : 0.01 |
| fragment_181.0225 | : 0.08 | fragment_283.1075 | : 0.01 |
| fragment_369.1825 | : 0.07 | loss_106.0625     | : 0.01 |
| fragment_313.1175 | : 0.04 | fragment_348.2875 | : 0.01 |
| loss_129.7075     | : 0.04 | fragment_227.0475 | : 0.01 |
| fragment_162.9475 | : 0.04 | fragment_370.1825 | : 0.01 |
| loss_50.0375      | : 0.04 |                   |        |
| loss_188.5475     | : 0.03 |                   |        |
| loss_181.1425     | : 0.03 |                   |        |
| fragment_111.5125 | : 0.03 |                   |        |
| loss_167.6525     | : 0.03 |                   |        |
| loss_171.6275     | : 0.03 |                   |        |
| loss_78.0325      | : 0.02 |                   |        |
| loss_108.5825     | : 0.02 |                   |        |
| loss_172.1375     | : 0.02 |                   |        |
| fragment_120.5175 | : 0.02 |                   |        |
| loss_68.0475      | : 0.02 |                   |        |
| fragment_131.0875 | : 0.02 |                   |        |
| loss_120.0775     | : 0.01 |                   |        |

motif\_393

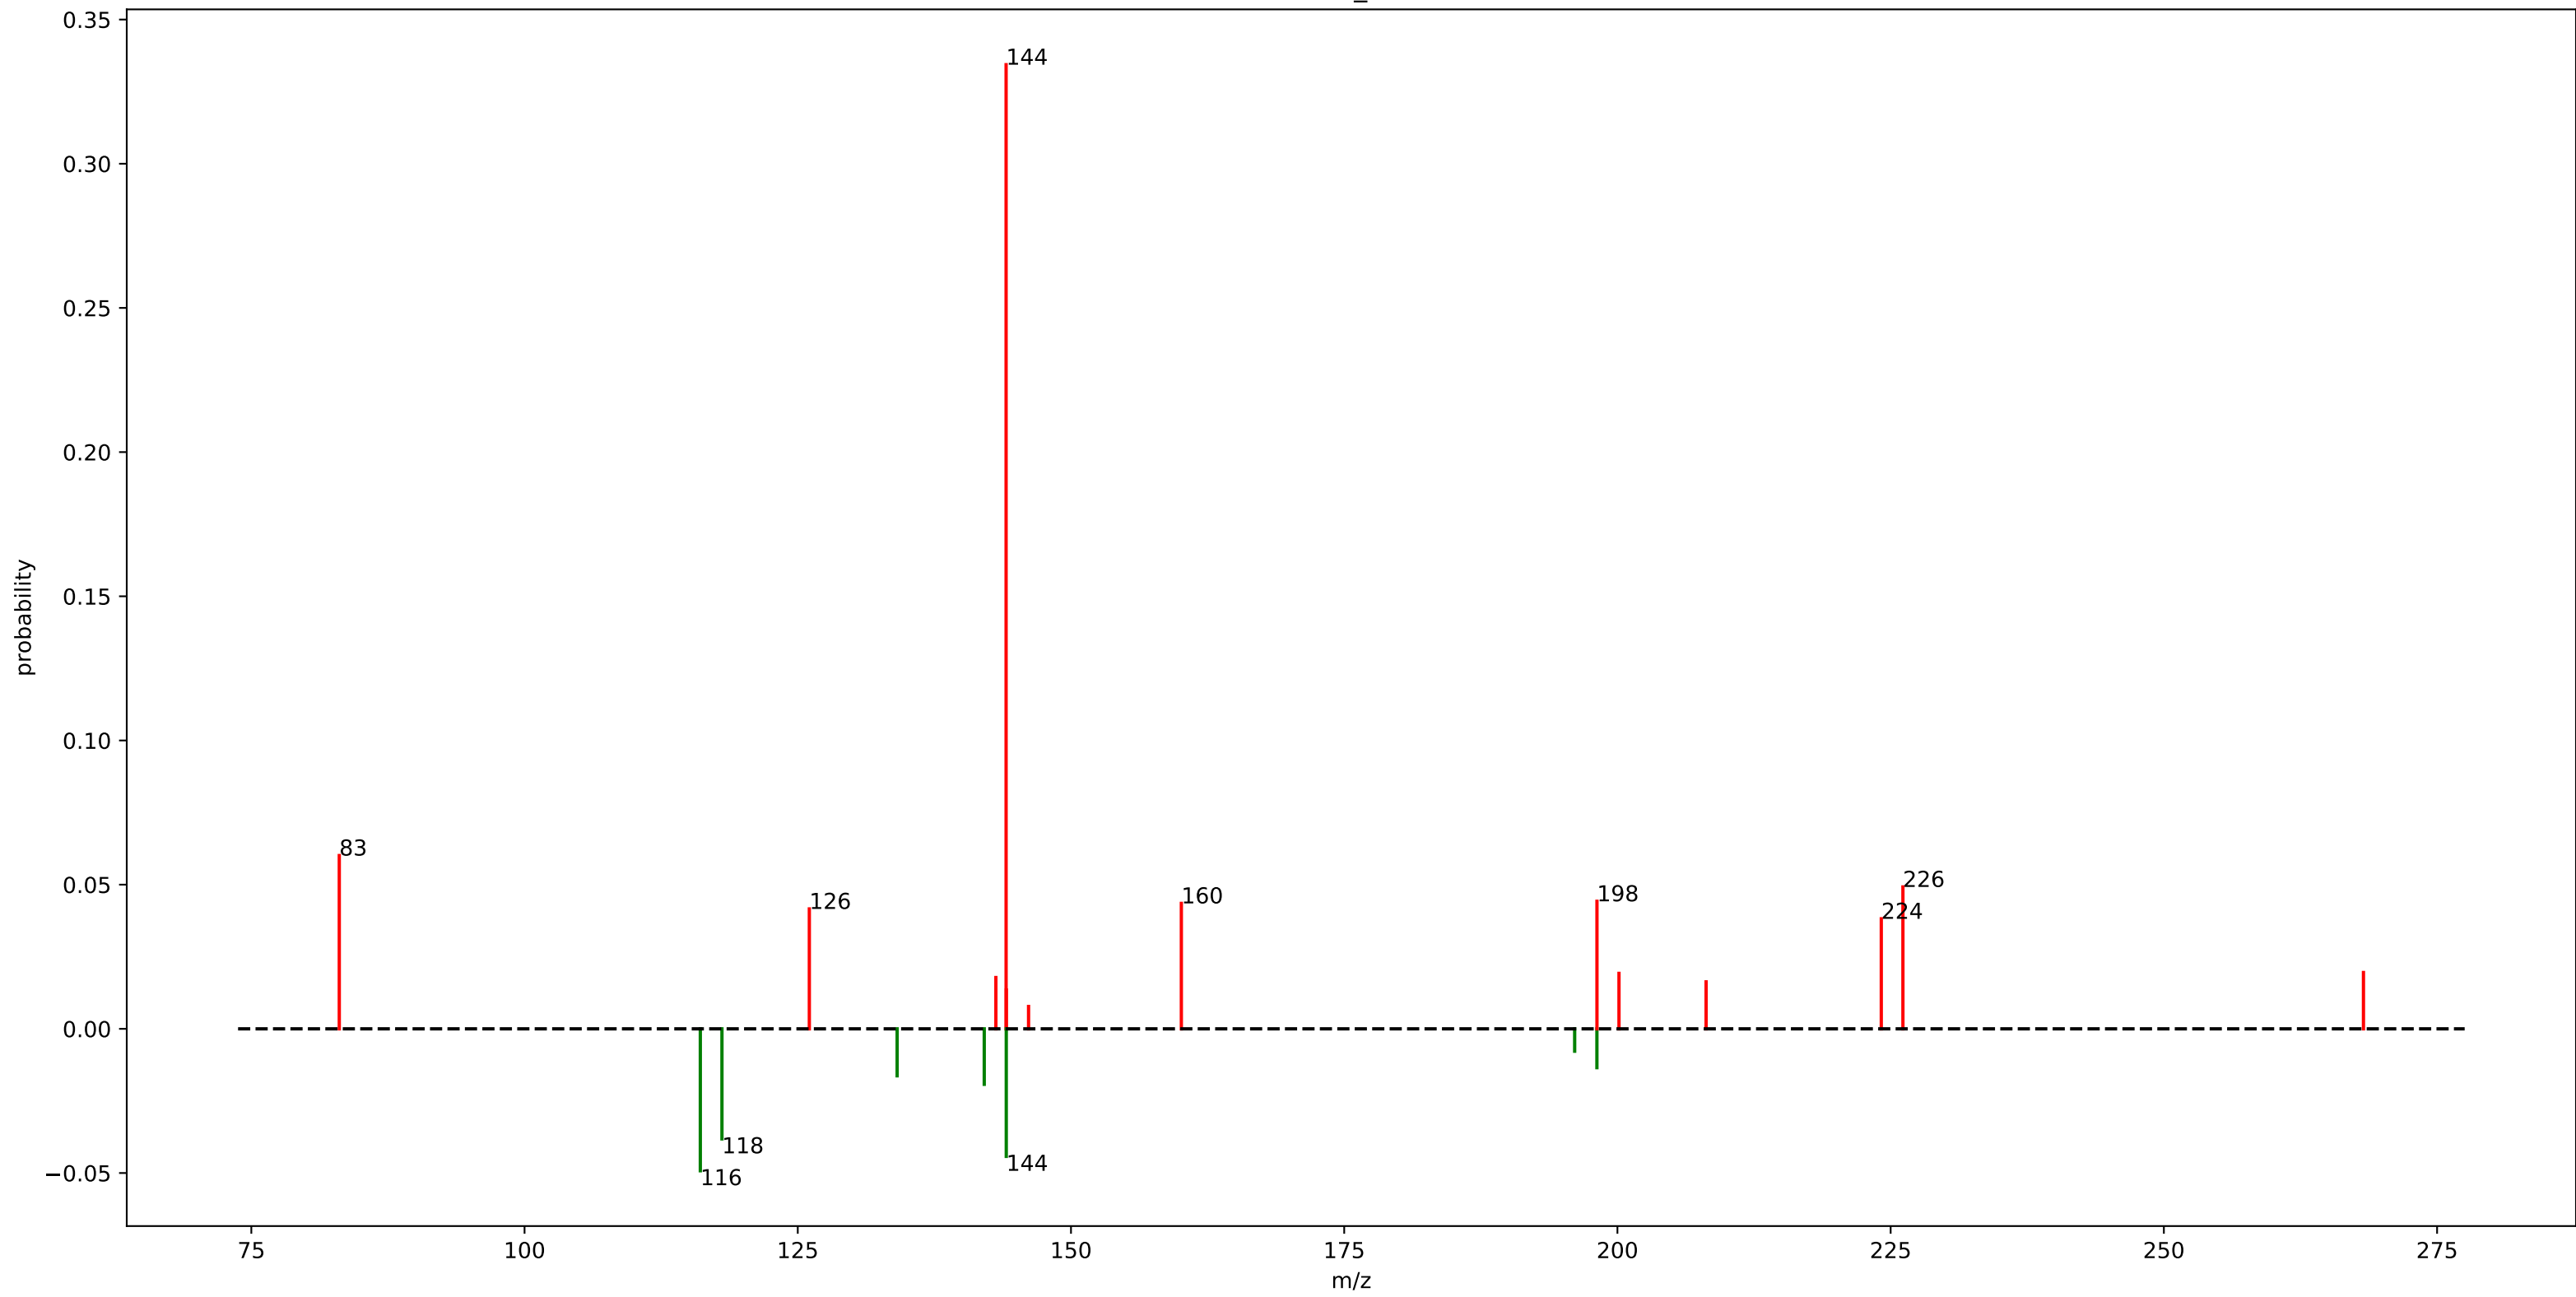

## motif\_393

|                   |        |
|-------------------|--------|
| fragment_144.0625 | : 0.33 |
| fragment_83.0475  | : 0.06 |
| loss_116.0825     | : 0.05 |
| fragment_226.1225 | : 0.05 |
| fragment_198.1275 | : 0.04 |
| loss_144.0775     | : 0.04 |
| fragment_160.0975 | : 0.04 |
| fragment_126.0575 | : 0.04 |
| loss_118.0625     | : 0.04 |
| fragment_224.1425 | : 0.04 |
| fragment_268.2625 | : 0.02 |
| fragment_200.1425 | : 0.02 |
| loss_142.0625     | : 0.02 |
| fragment_143.1275 | : 0.02 |
| loss_134.0925     | : 0.02 |
| fragment_208.1125 | : 0.02 |
| loss_198.1225     | : 0.01 |
| fragment_144.0825 | : 0.01 |
| fragment_146.1175 | : 0.01 |
| loss_196.0875     | : 0.01 |

motif\_392

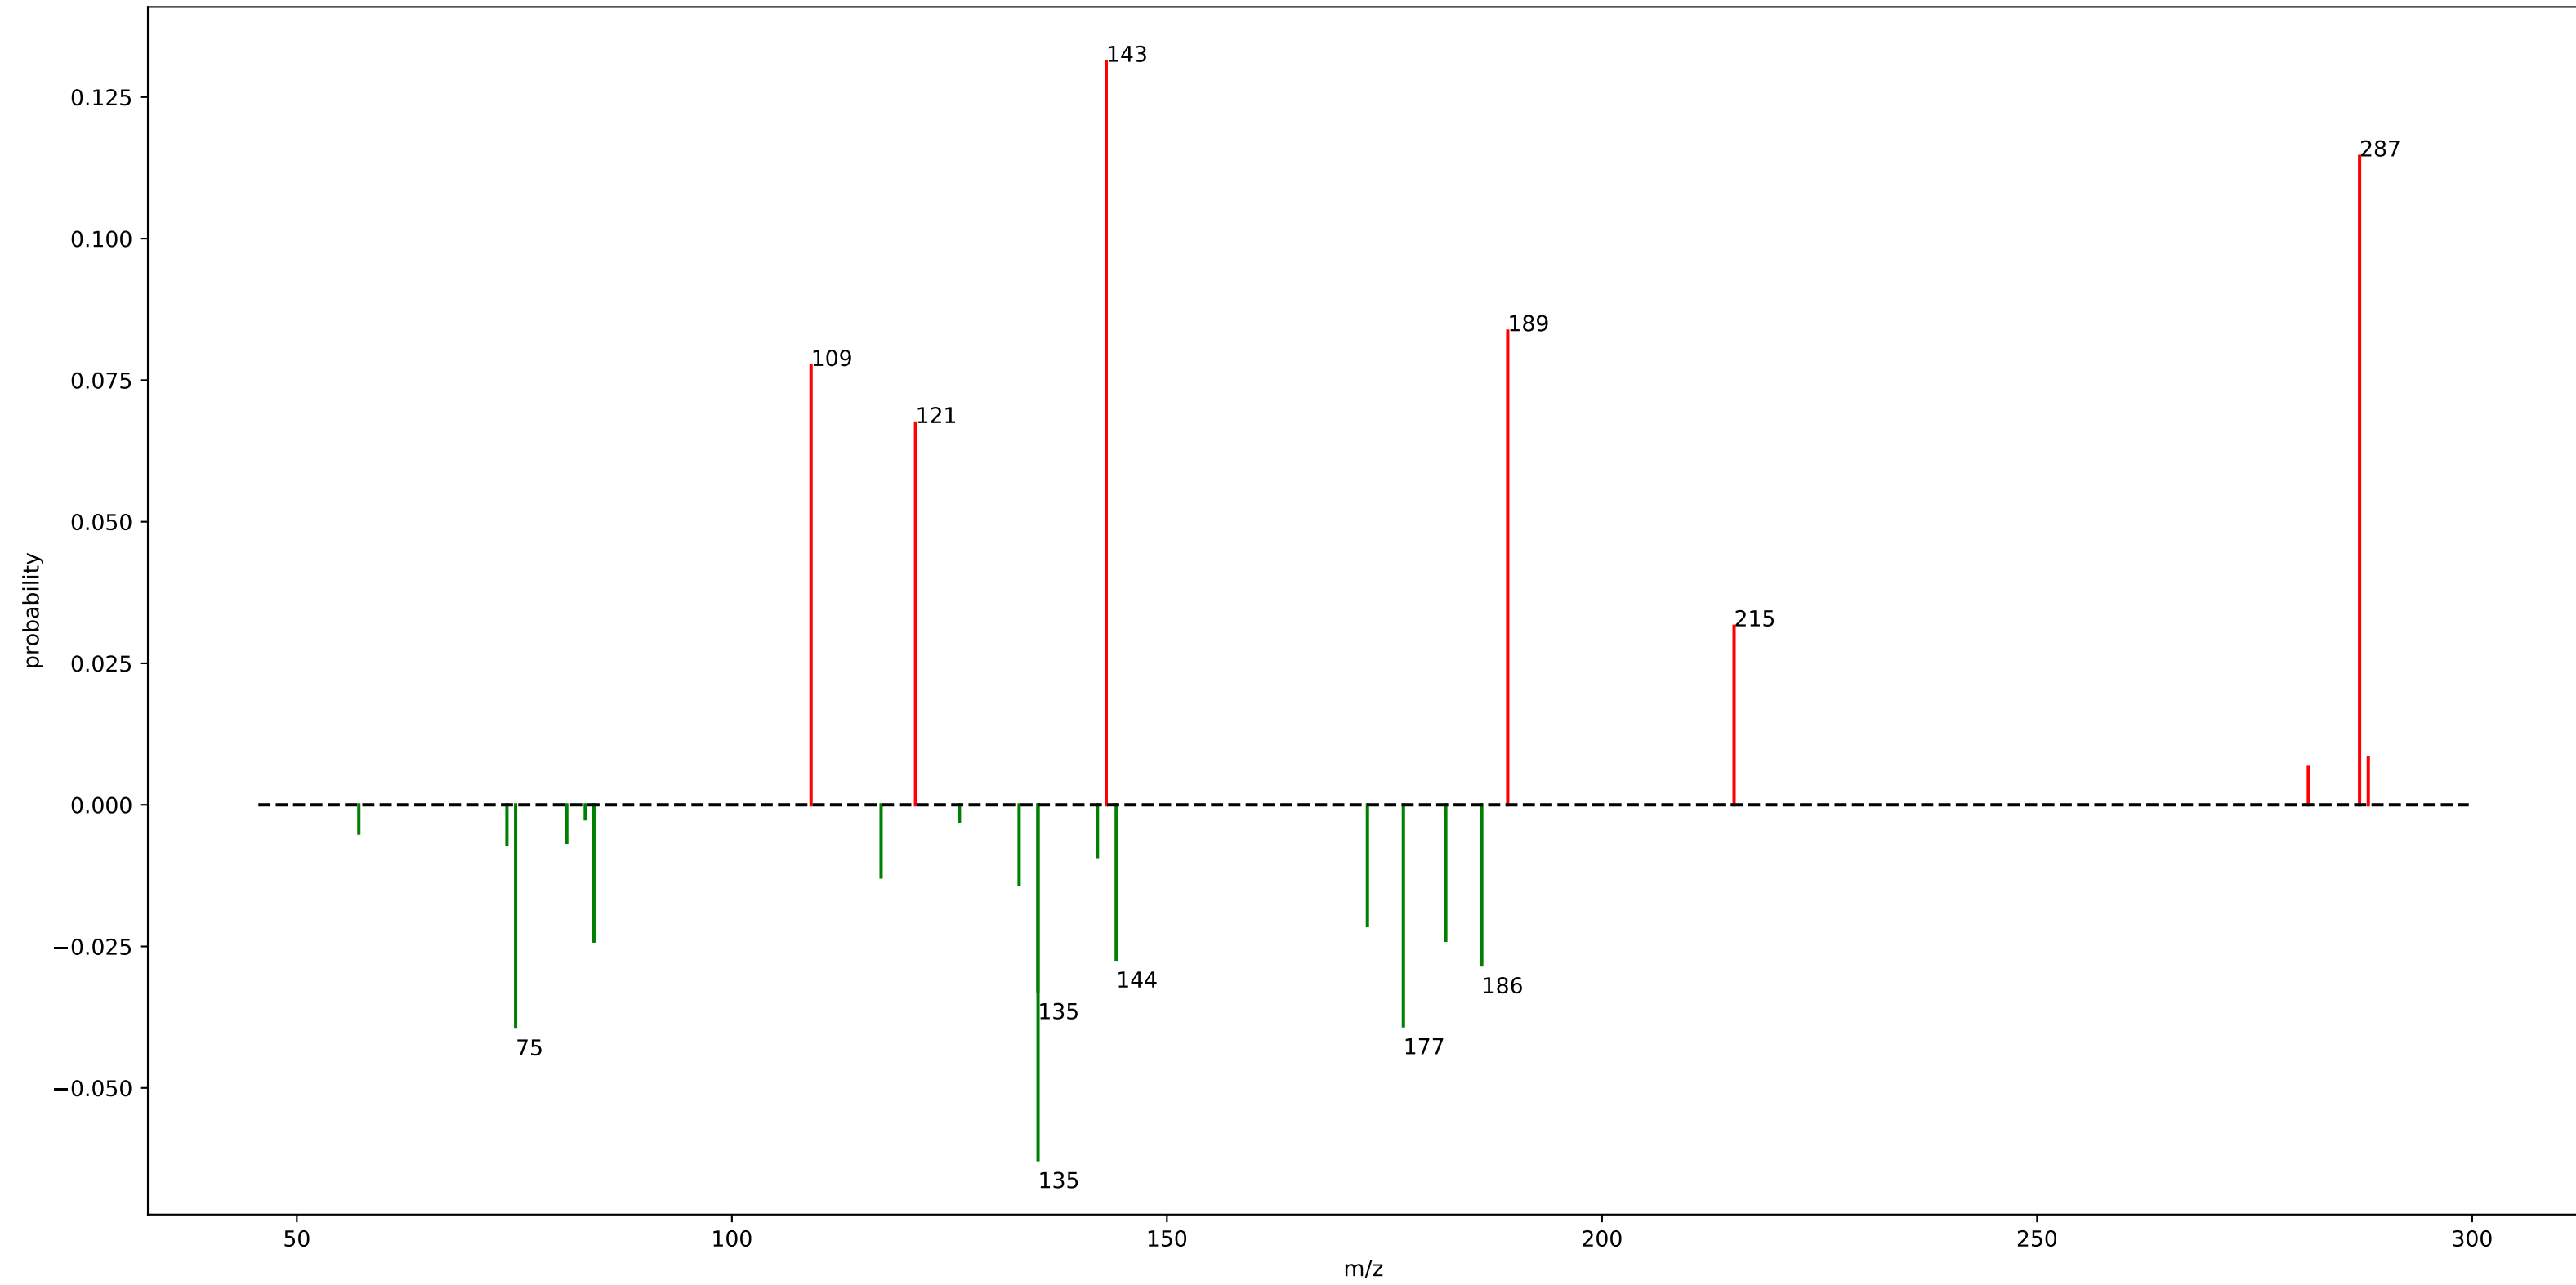

## motif\_392

|                   |        |                   |        |
|-------------------|--------|-------------------|--------|
| fragment_143.0175 | : 0.13 | loss_81.0225      | : 0.01 |
| fragment_287.0625 | : 0.11 | fragment_281.1725 | : 0.01 |
| fragment_189.1625 | : 0.08 |                   |        |
| fragment_109.0975 | : 0.08 |                   |        |
| fragment_121.1025 | : 0.07 |                   |        |
| loss_135.1825     | : 0.06 |                   |        |
| loss_75.1375      | : 0.04 |                   |        |
| loss_177.1725     | : 0.04 |                   |        |
| loss_135.1625     | : 0.03 |                   |        |
| fragment_215.1775 | : 0.03 |                   |        |
| loss_186.1775     | : 0.03 |                   |        |
| loss_144.1675     | : 0.03 |                   |        |
| loss_84.1425      | : 0.02 |                   |        |
| loss_182.0425     | : 0.02 |                   |        |
| loss_173.0375     | : 0.02 |                   |        |
| loss_133.0075     | : 0.01 |                   |        |
| loss_117.1475     | : 0.01 |                   |        |
| loss_142.0125     | : 0.01 |                   |        |
| fragment_288.0625 | : 0.01 |                   |        |
| loss_74.1375      | : 0.01 |                   |        |

urine\_mass2motif\_102.m2m

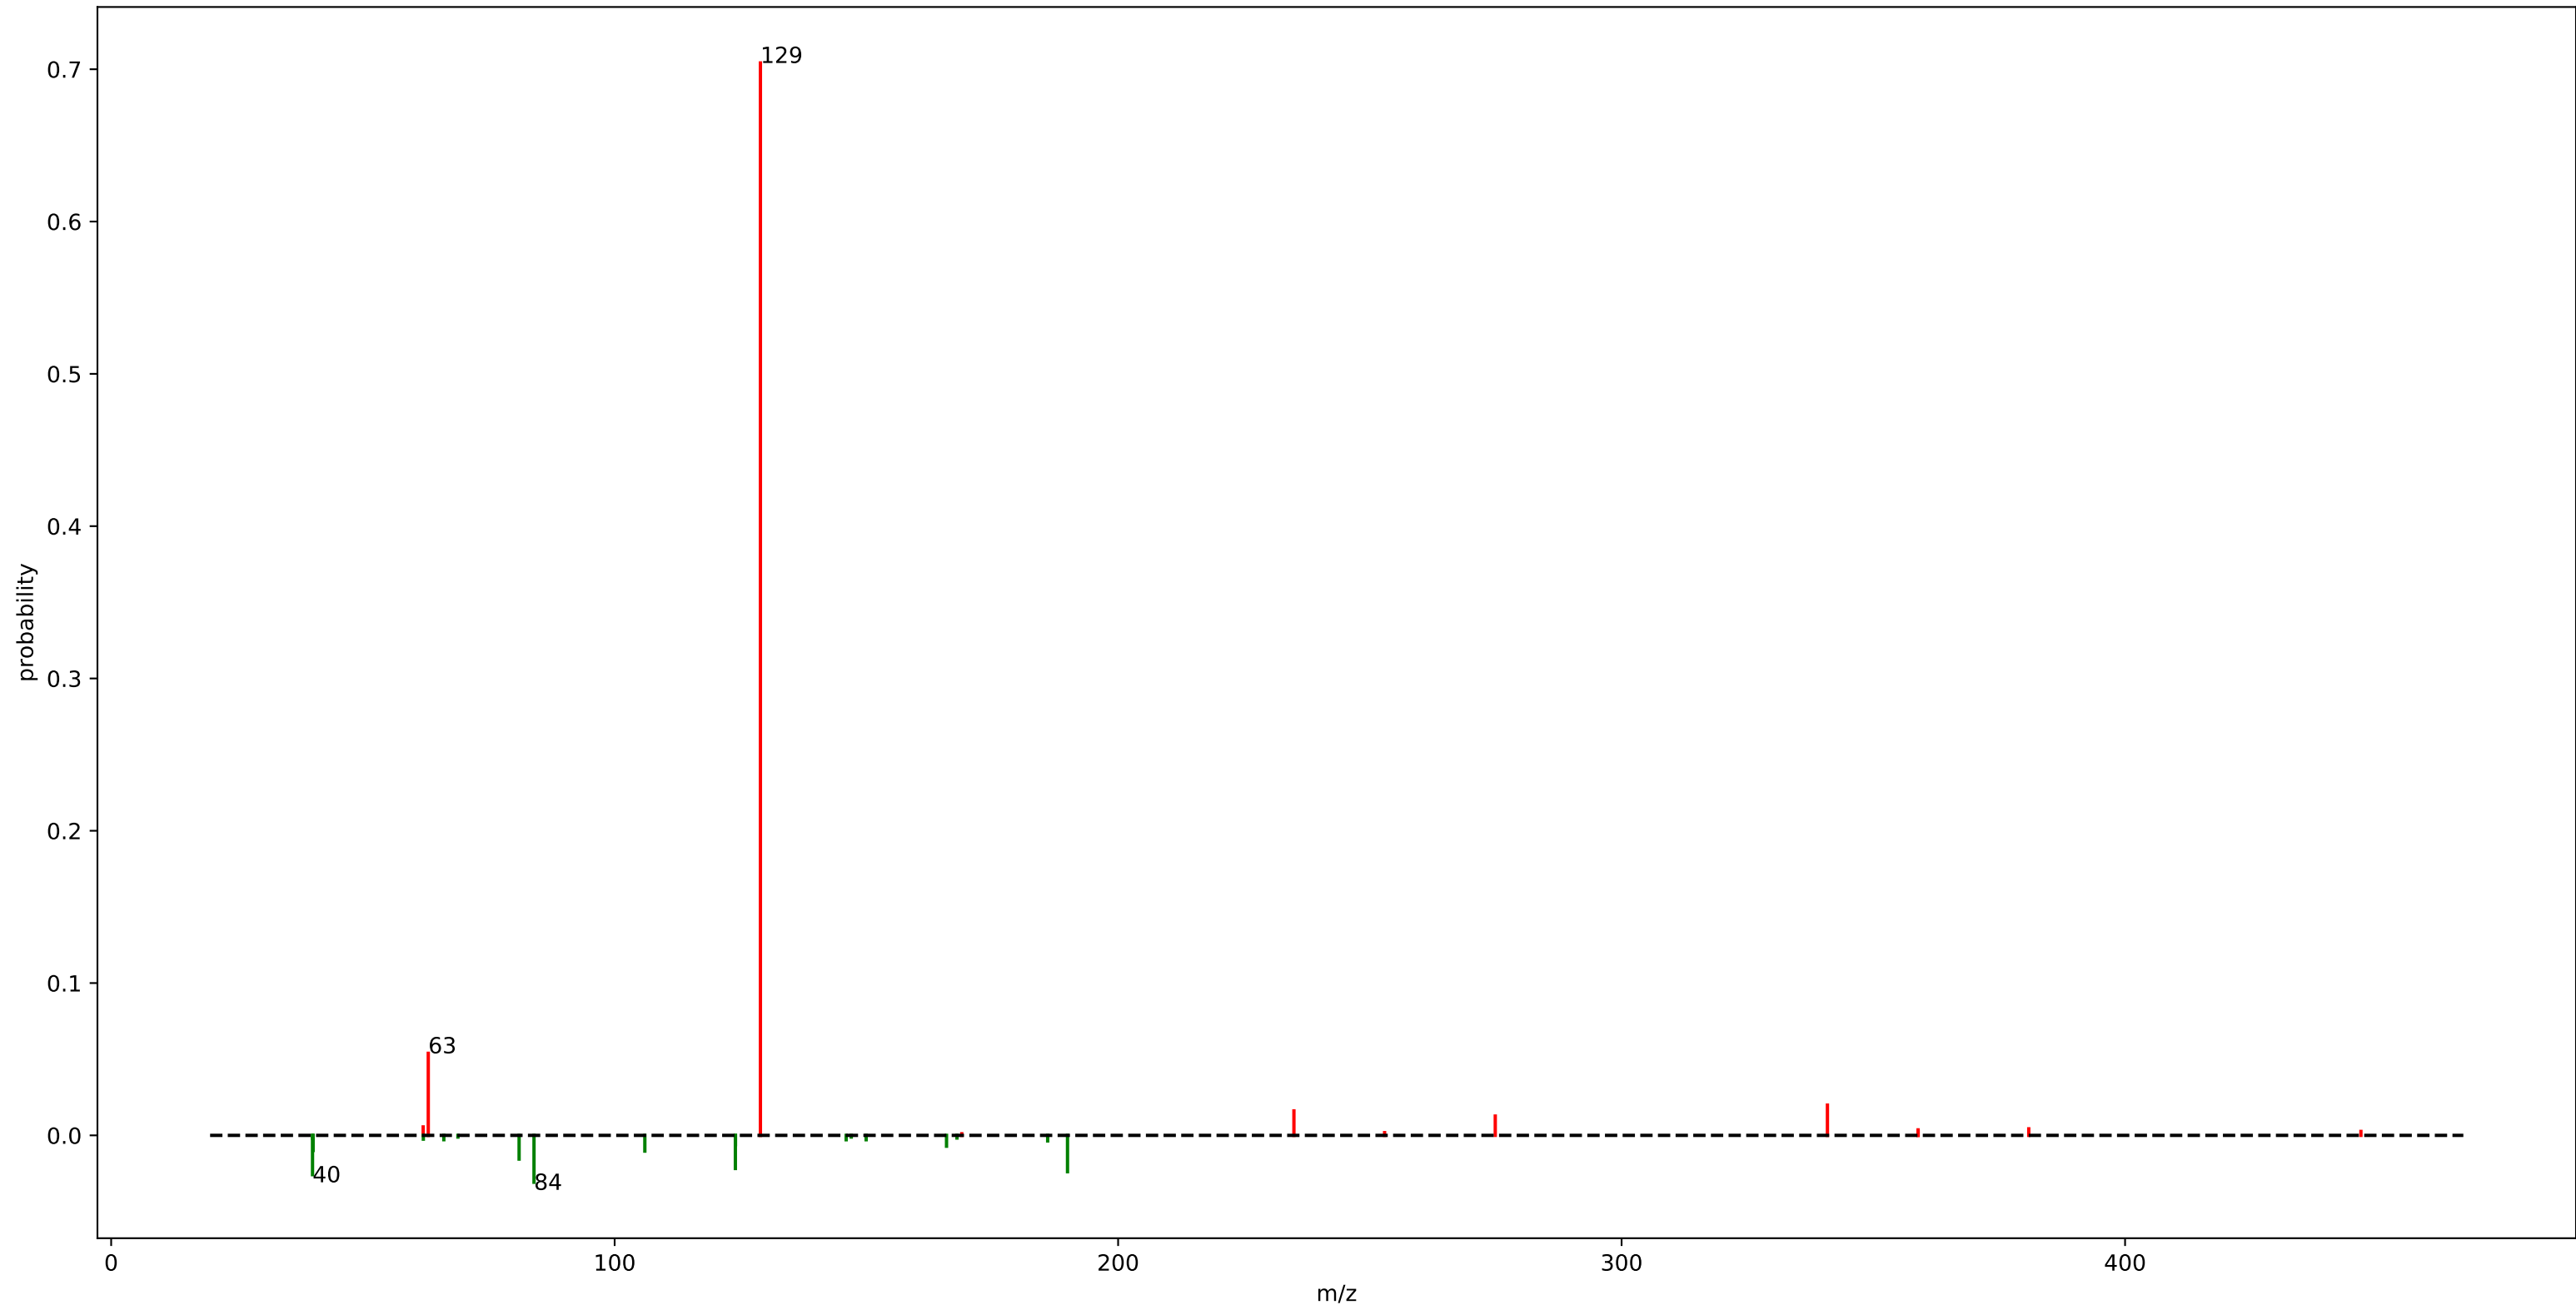

## urine\_mass2motif\_102.m2m

|                   |        |
|-------------------|--------|
| fragment_128.9525 | : 0.70 |
| fragment_62.9825  | : 0.05 |
| loss_83.9825      | : 0.03 |
| loss_39.9925      | : 0.03 |
| loss_189.9475     | : 0.02 |
| loss_123.9775     | : 0.02 |
| fragment_340.8825 | : 0.02 |
| fragment_234.9175 | : 0.02 |
| loss_81.0225      | : 0.02 |
| fragment_274.9075 | : 0.01 |
| loss_105.9975     | : 0.01 |
| loss_40.1075      | : 0.01 |
| loss_165.9175     | : 0.01 |
| loss_124.0025     | : 0.01 |
| fragment_61.9725  | : 0.01 |



rhamn\_motif\_28.m2m

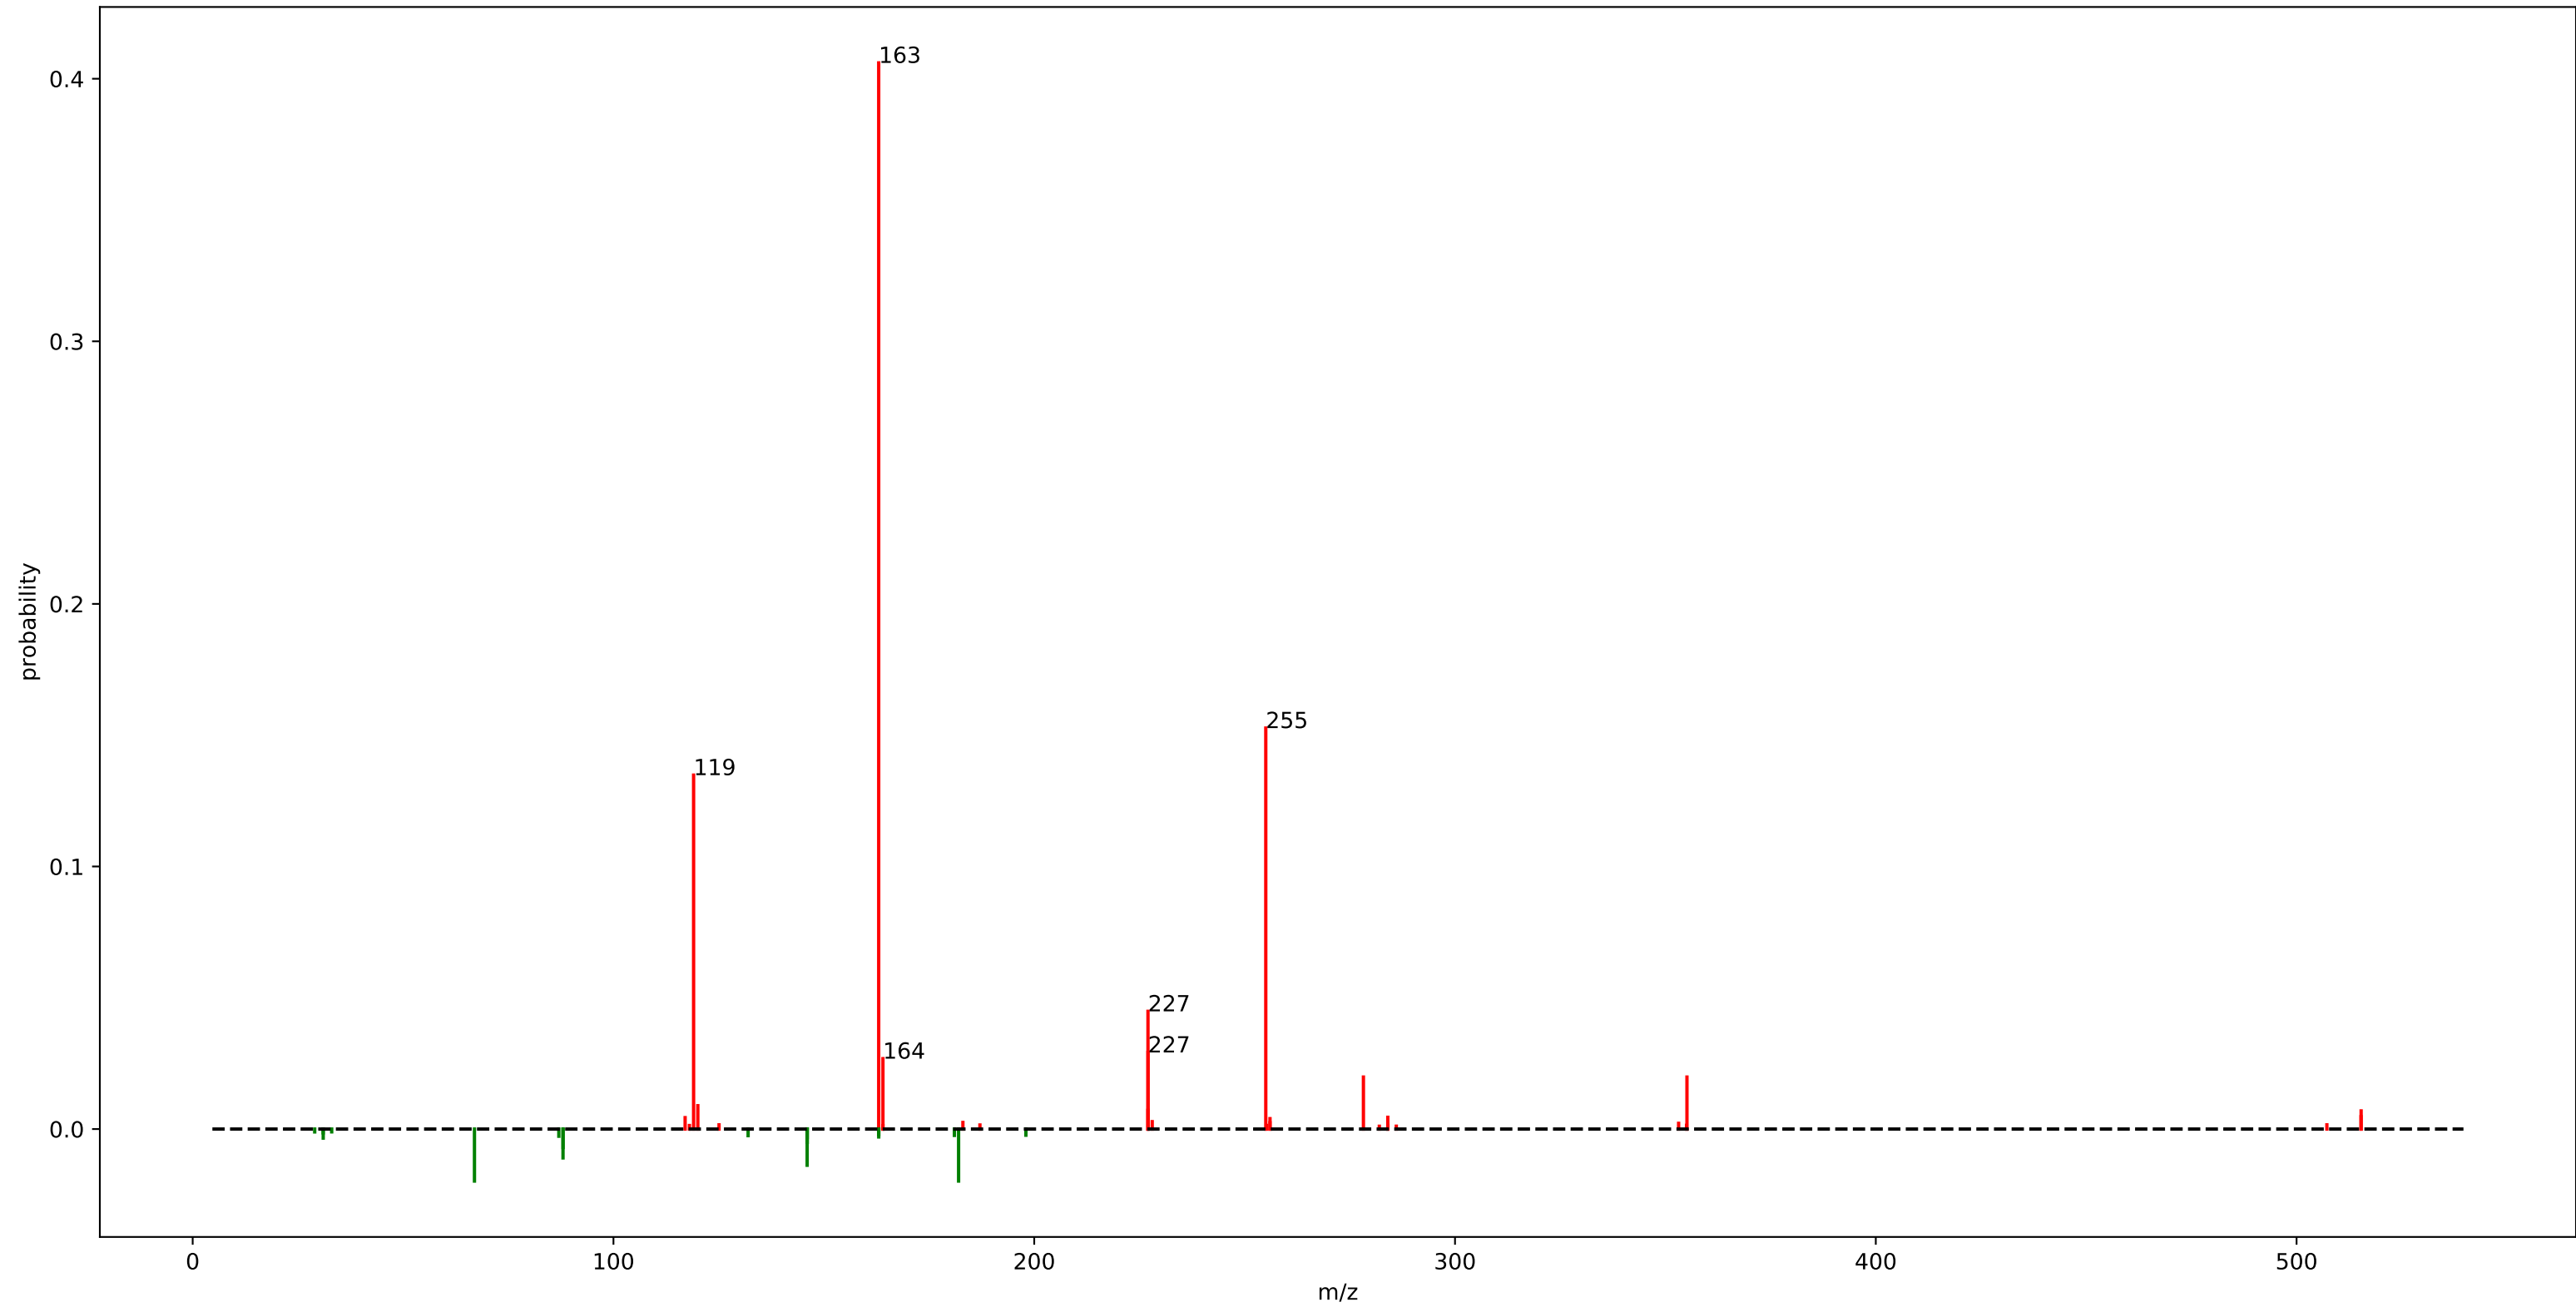

## rhamn\_motif\_28.m2m

|                   |        |
|-------------------|--------|
| fragment_163.0375 | : 0.41 |
| fragment_255.0275 | : 0.15 |
| fragment_119.0475 | : 0.13 |
| fragment_227.0325 | : 0.04 |
| fragment_227.0375 | : 0.03 |
| fragment_164.0425 | : 0.03 |
| fragment_355.1225 | : 0.02 |
| loss_66.9675      | : 0.02 |
| loss_182.0225     | : 0.02 |
| fragment_278.2325 | : 0.02 |
| loss_146.0325     | : 0.01 |
| loss_88.0125      | : 0.01 |
| fragment_120.0525 | : 0.01 |
| fragment_227.0275 | : 0.01 |
| loss_88.0225      | : 0.01 |
| fragment_515.3425 | : 0.01 |
| loss_146.0525     | : 0.01 |

urine\_mass2motif\_50.m2m

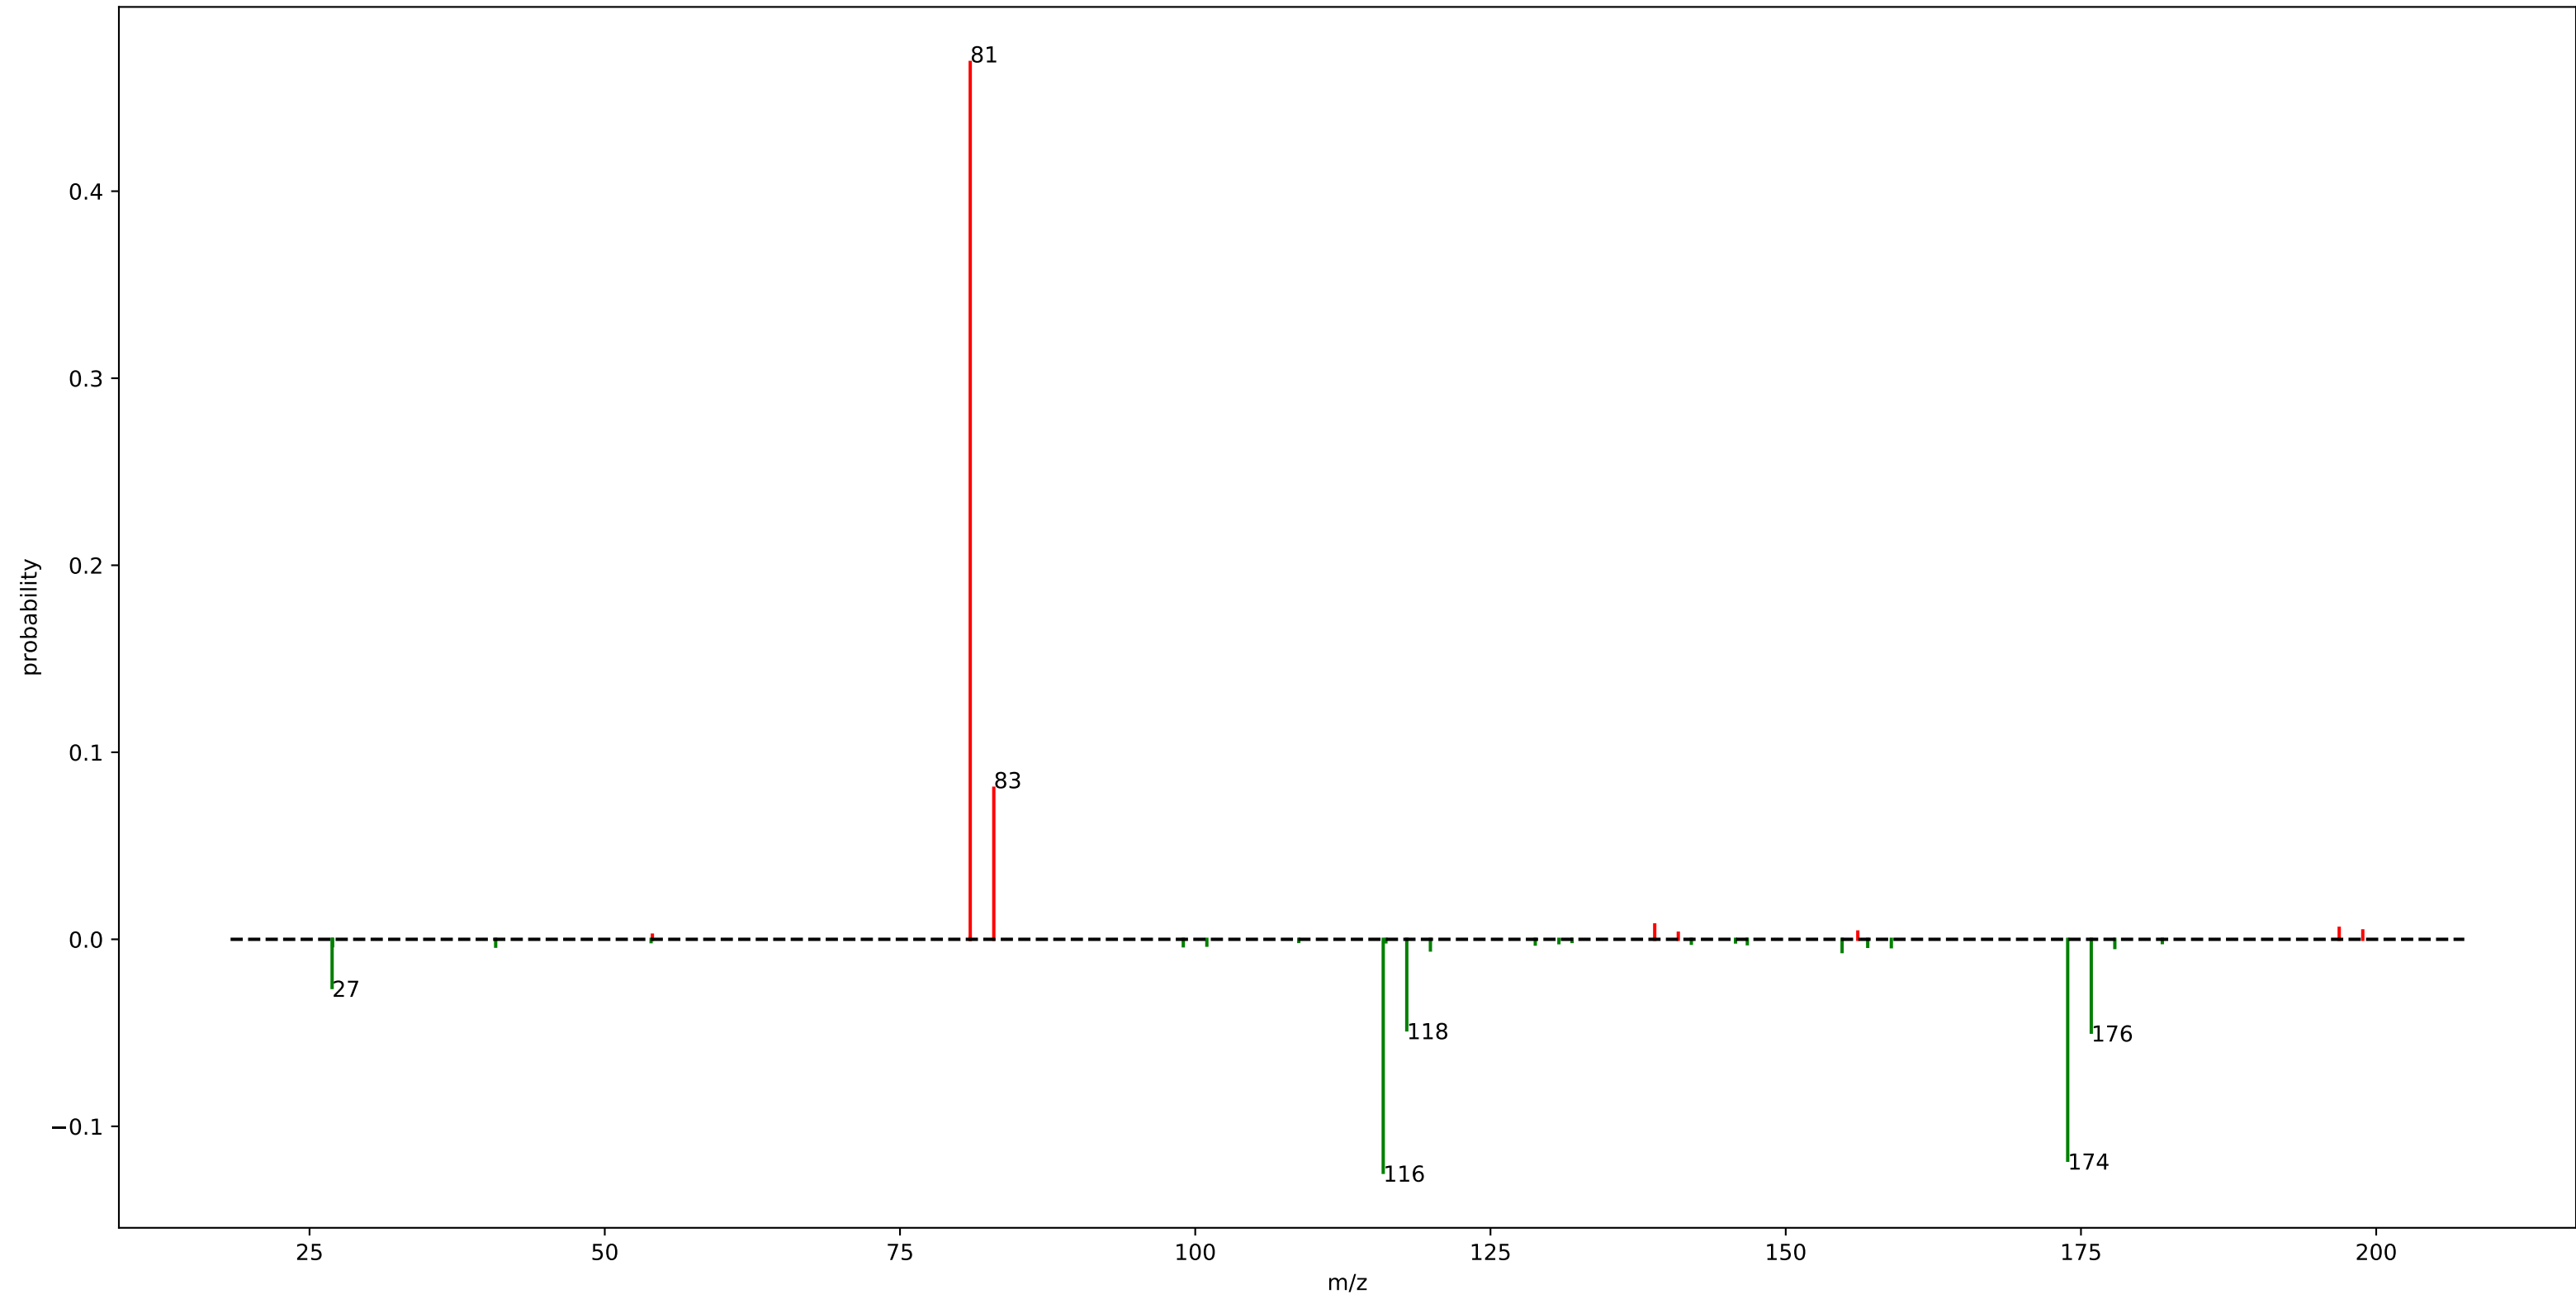

## urine\_mass2motif\_50.m2m

|                   |        |
|-------------------|--------|
| fragment_80.9475  | : 0.47 |
| loss_115.9175     | : 0.12 |
| loss_173.8775     | : 0.12 |
| fragment_82.9425  | : 0.08 |
| loss_175.8725     | : 0.05 |
| loss_117.9125     | : 0.05 |
| loss_26.9125      | : 0.03 |
| fragment_138.9075 | : 0.01 |
| loss_154.7725     | : 0.01 |
| fragment_196.8675 | : 0.01 |
| loss_119.9125     | : 0.01 |

StrepSalini\_motif\_106.m2m

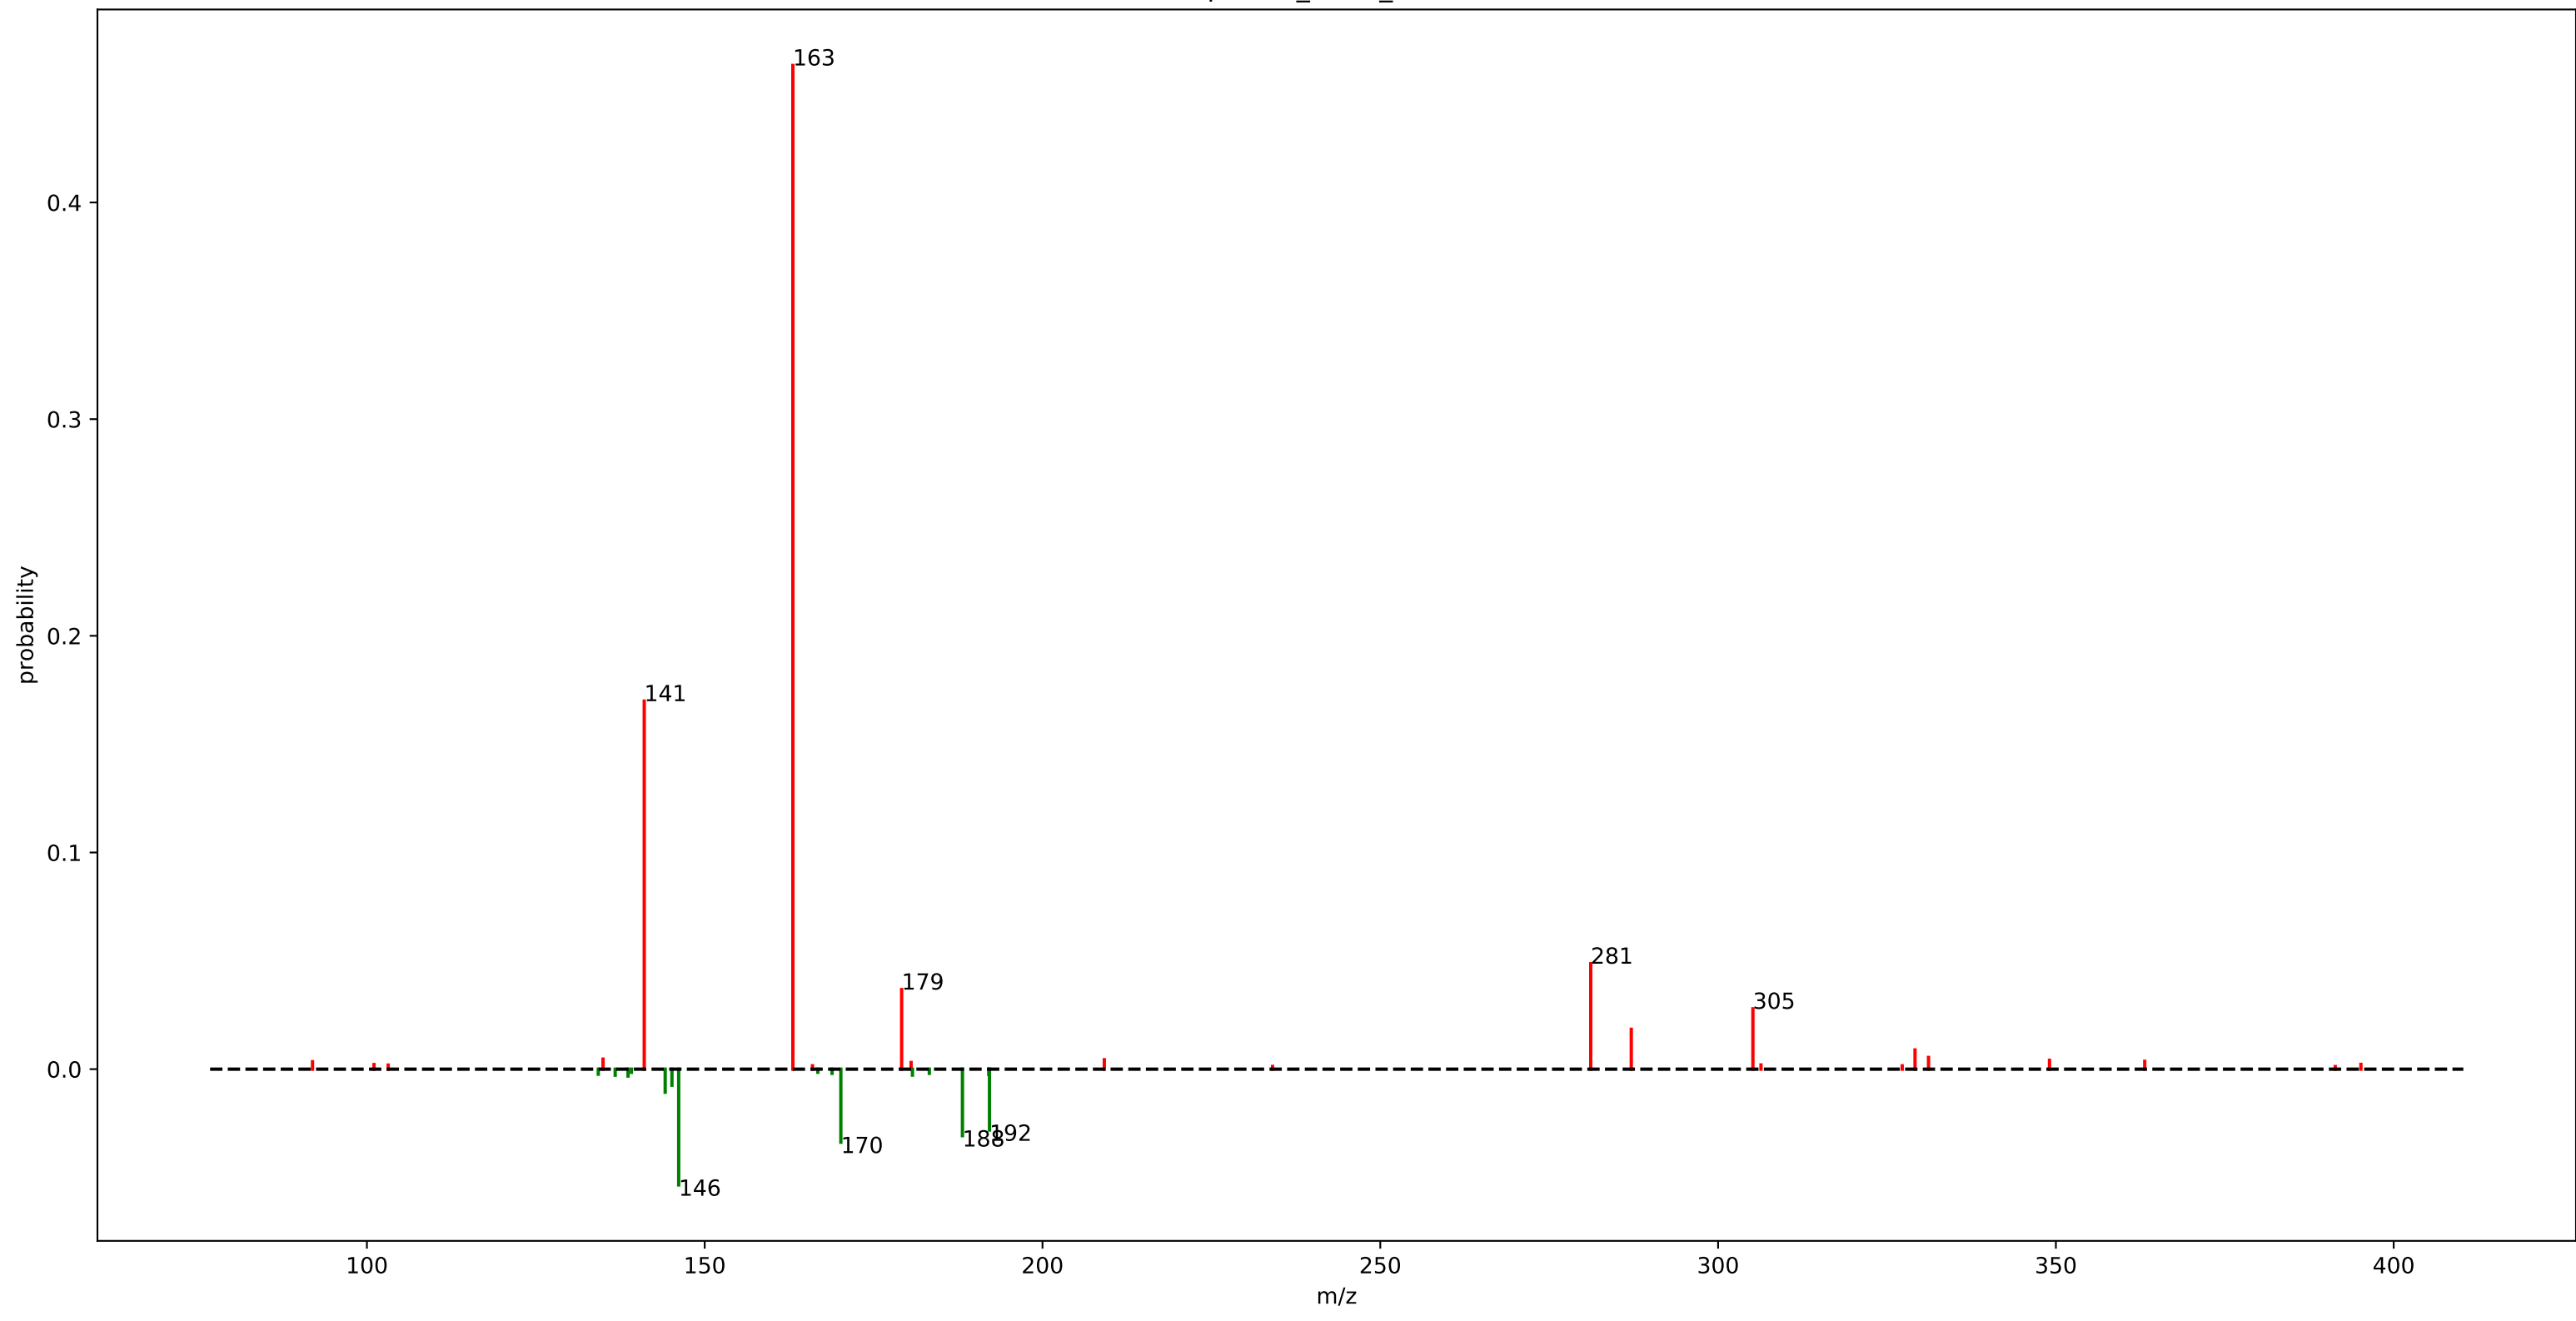

## StrepSalini\_motif\_106.m2m

|                   |        |
|-------------------|--------|
| fragment_163.0500 | : 0.46 |
| fragment_141.0500 | : 0.17 |
| loss_146.1500     | : 0.05 |
| fragment_281.1500 | : 0.05 |
| fragment_179.1500 | : 0.04 |
| loss_170.1525     | : 0.03 |
| loss_188.1500     | : 0.03 |
| loss_192.1525     | : 0.03 |
| fragment_305.1525 | : 0.03 |
| fragment_287.1500 | : 0.02 |
| loss_144.1500     | : 0.01 |
| fragment_329.1500 | : 0.01 |
| loss_145.1500     | : 0.01 |
| fragment_331.1500 | : 0.01 |

urine\_mass2motif\_284.m2m

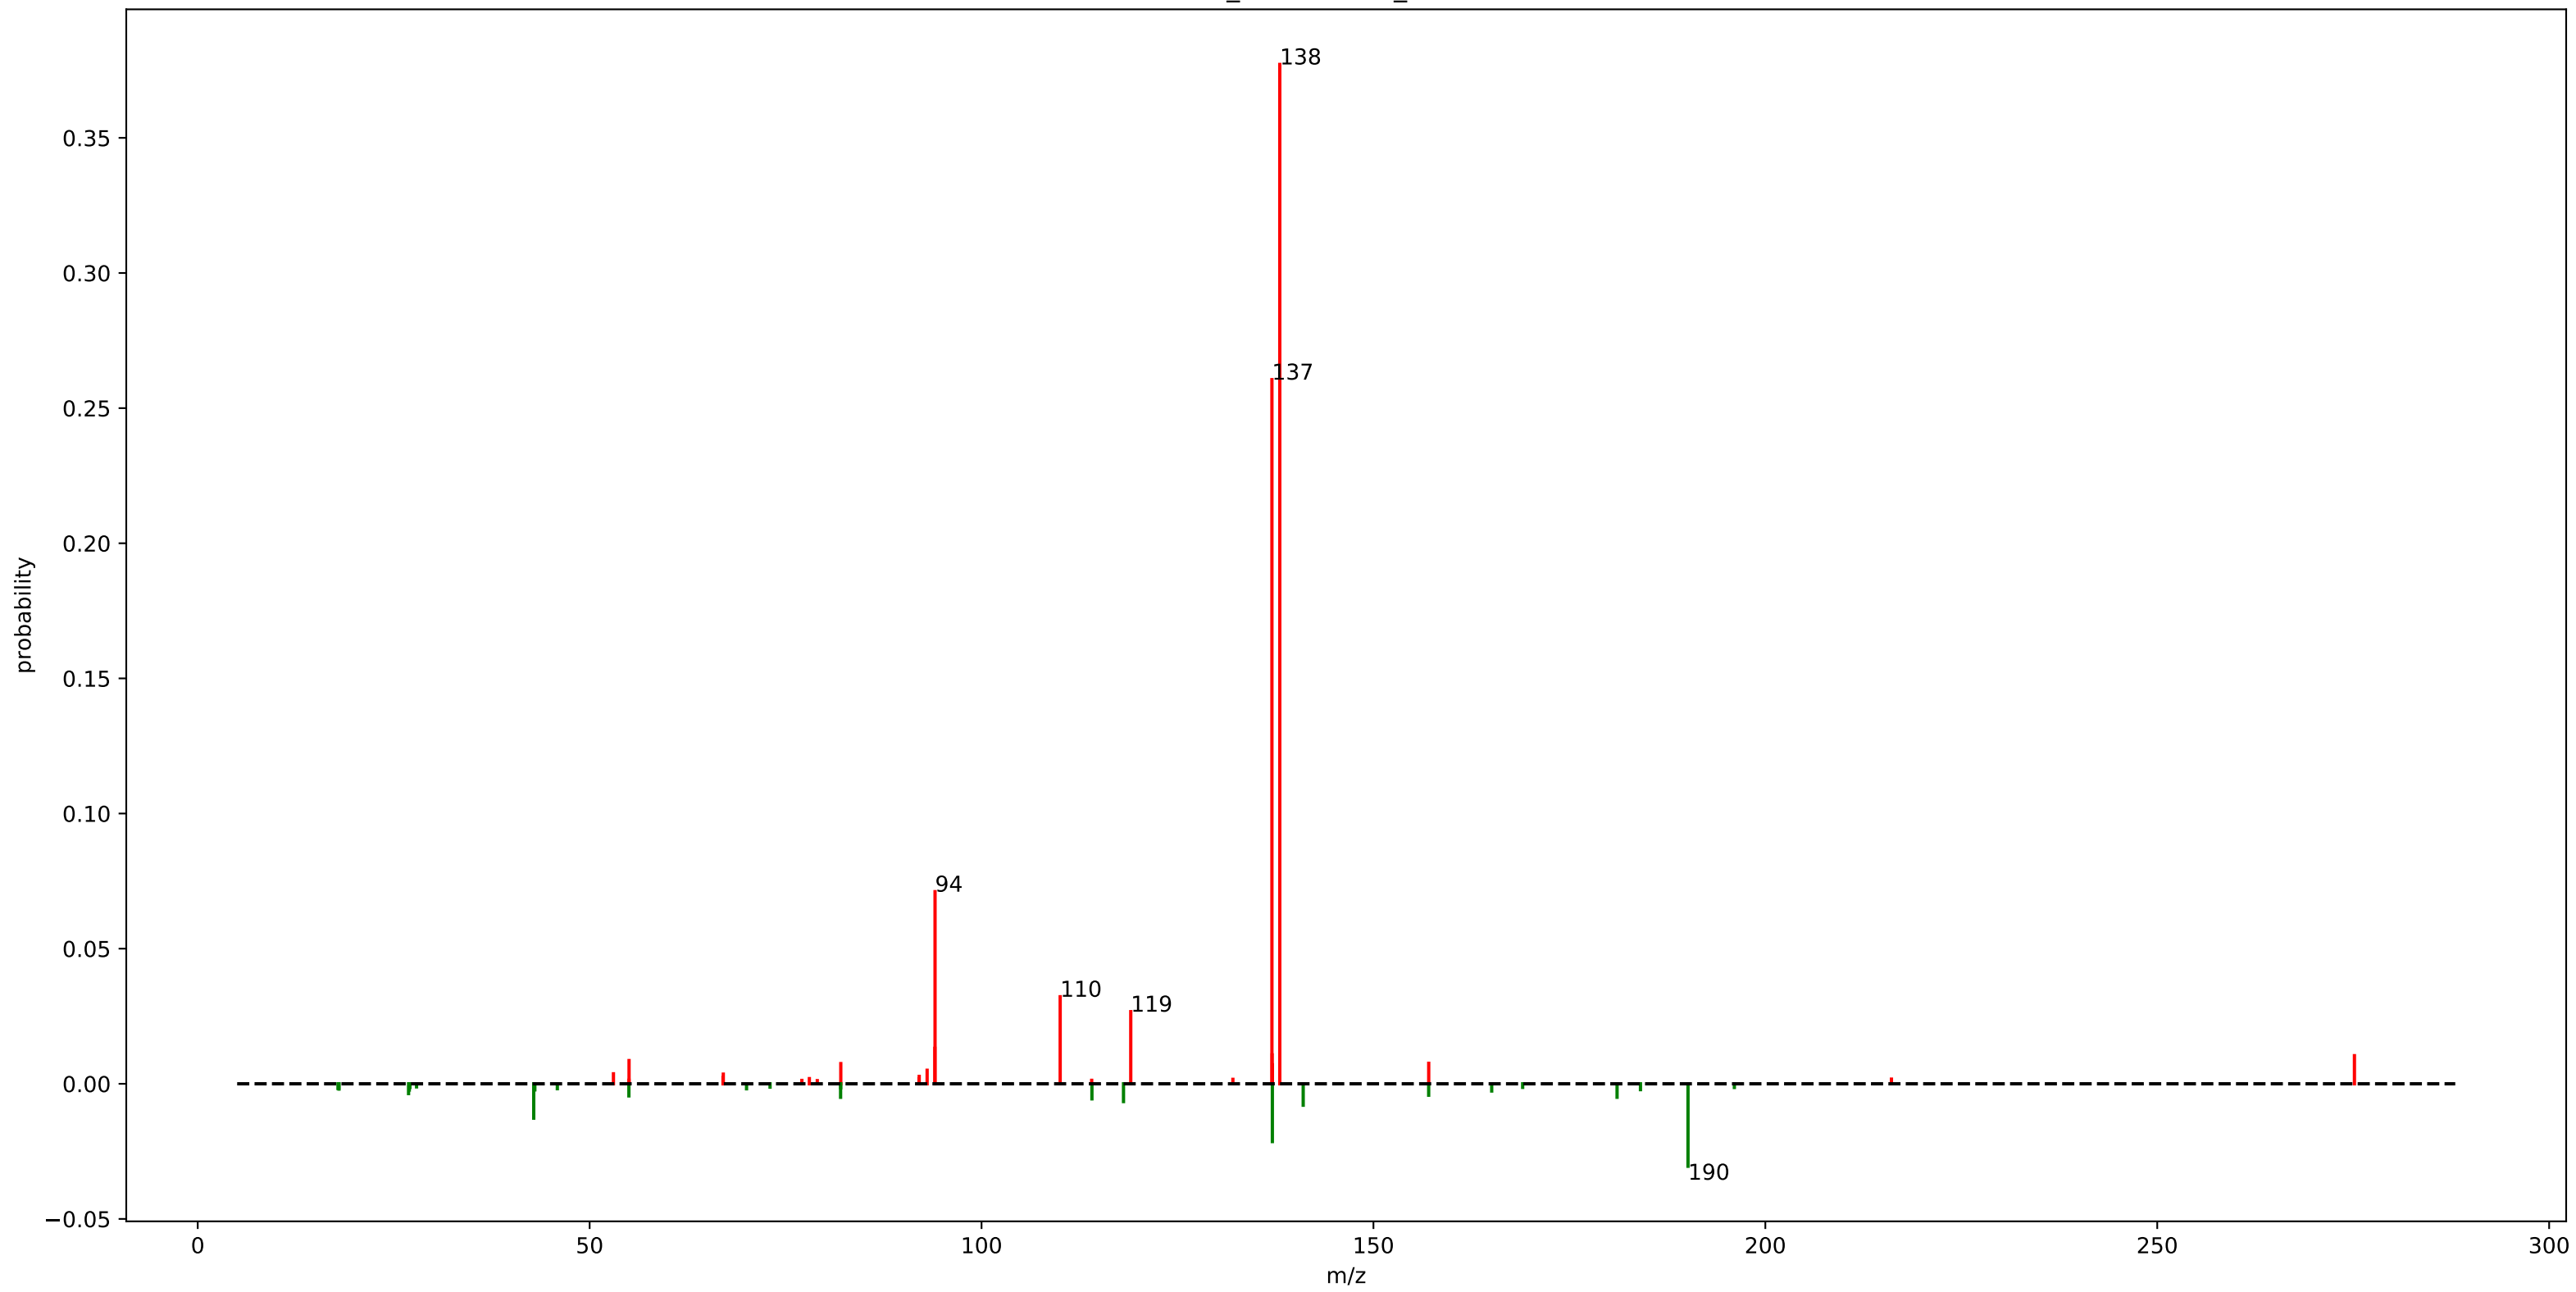

# urine\_mass2motif\_284.m2m

|                   |        |
|-------------------|--------|
| fragment_138.0525 | : 0.38 |
| fragment_137.0475 | : 0.26 |
| fragment_94.0675  | : 0.07 |
| fragment_110.0325 | : 0.03 |
| loss_190.1325     | : 0.03 |
| fragment_119.0375 | : 0.03 |
| loss_137.1025     | : 0.02 |
| fragment_94.0425  | : 0.01 |
| loss_42.8675      | : 0.01 |
| fragment_137.0725 | : 0.01 |
| fragment_275.1575 | : 0.01 |
| fragment_55.0275  | : 0.01 |
| loss_141.0375     | : 0.01 |
| fragment_157.0525 | : 0.01 |
| fragment_82.0425  | : 0.01 |
| fragment_137.1075 | : 0.01 |
| loss_118.1125     | : 0.01 |
| loss_114.0825     | : 0.01 |
| fragment_93.0575  | : 0.01 |



gnps\_motif\_21.m2m

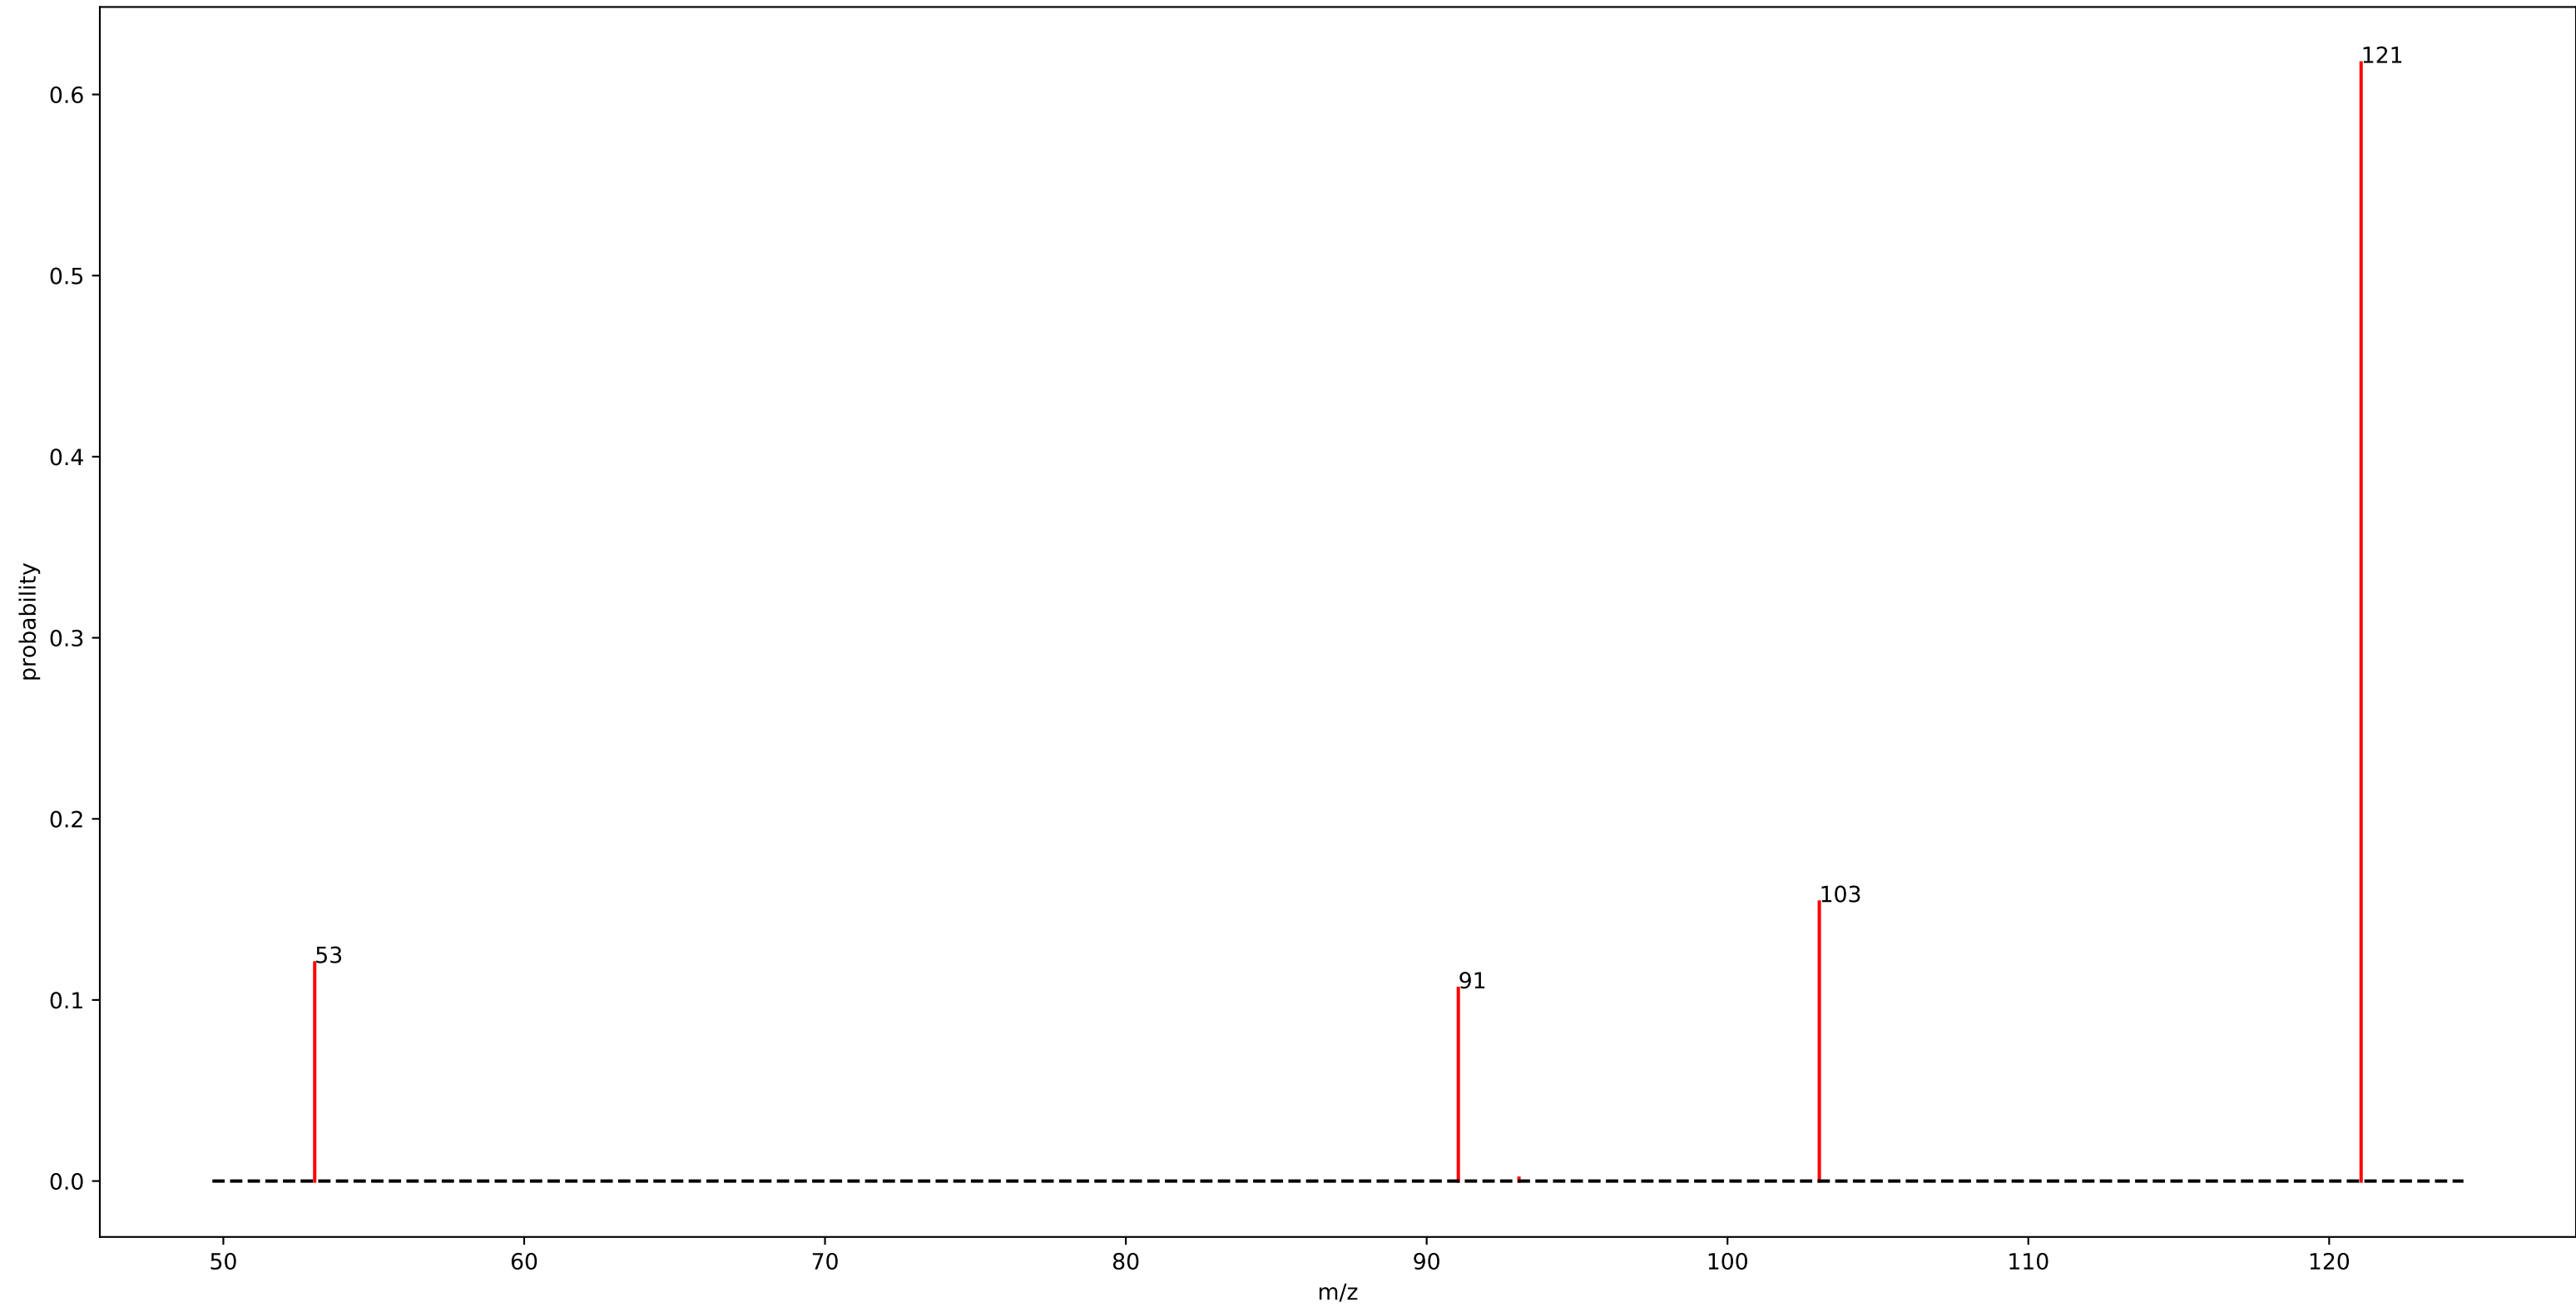

## gnps\_motif\_21.m2m

|                   |        |
|-------------------|--------|
| fragment_121.0625 | : 0.62 |
| fragment_103.0525 | : 0.15 |
| fragment_53.0375  | : 0.12 |
| fragment_91.0525  | : 0.11 |

urine\_mass2motif\_278.m2m

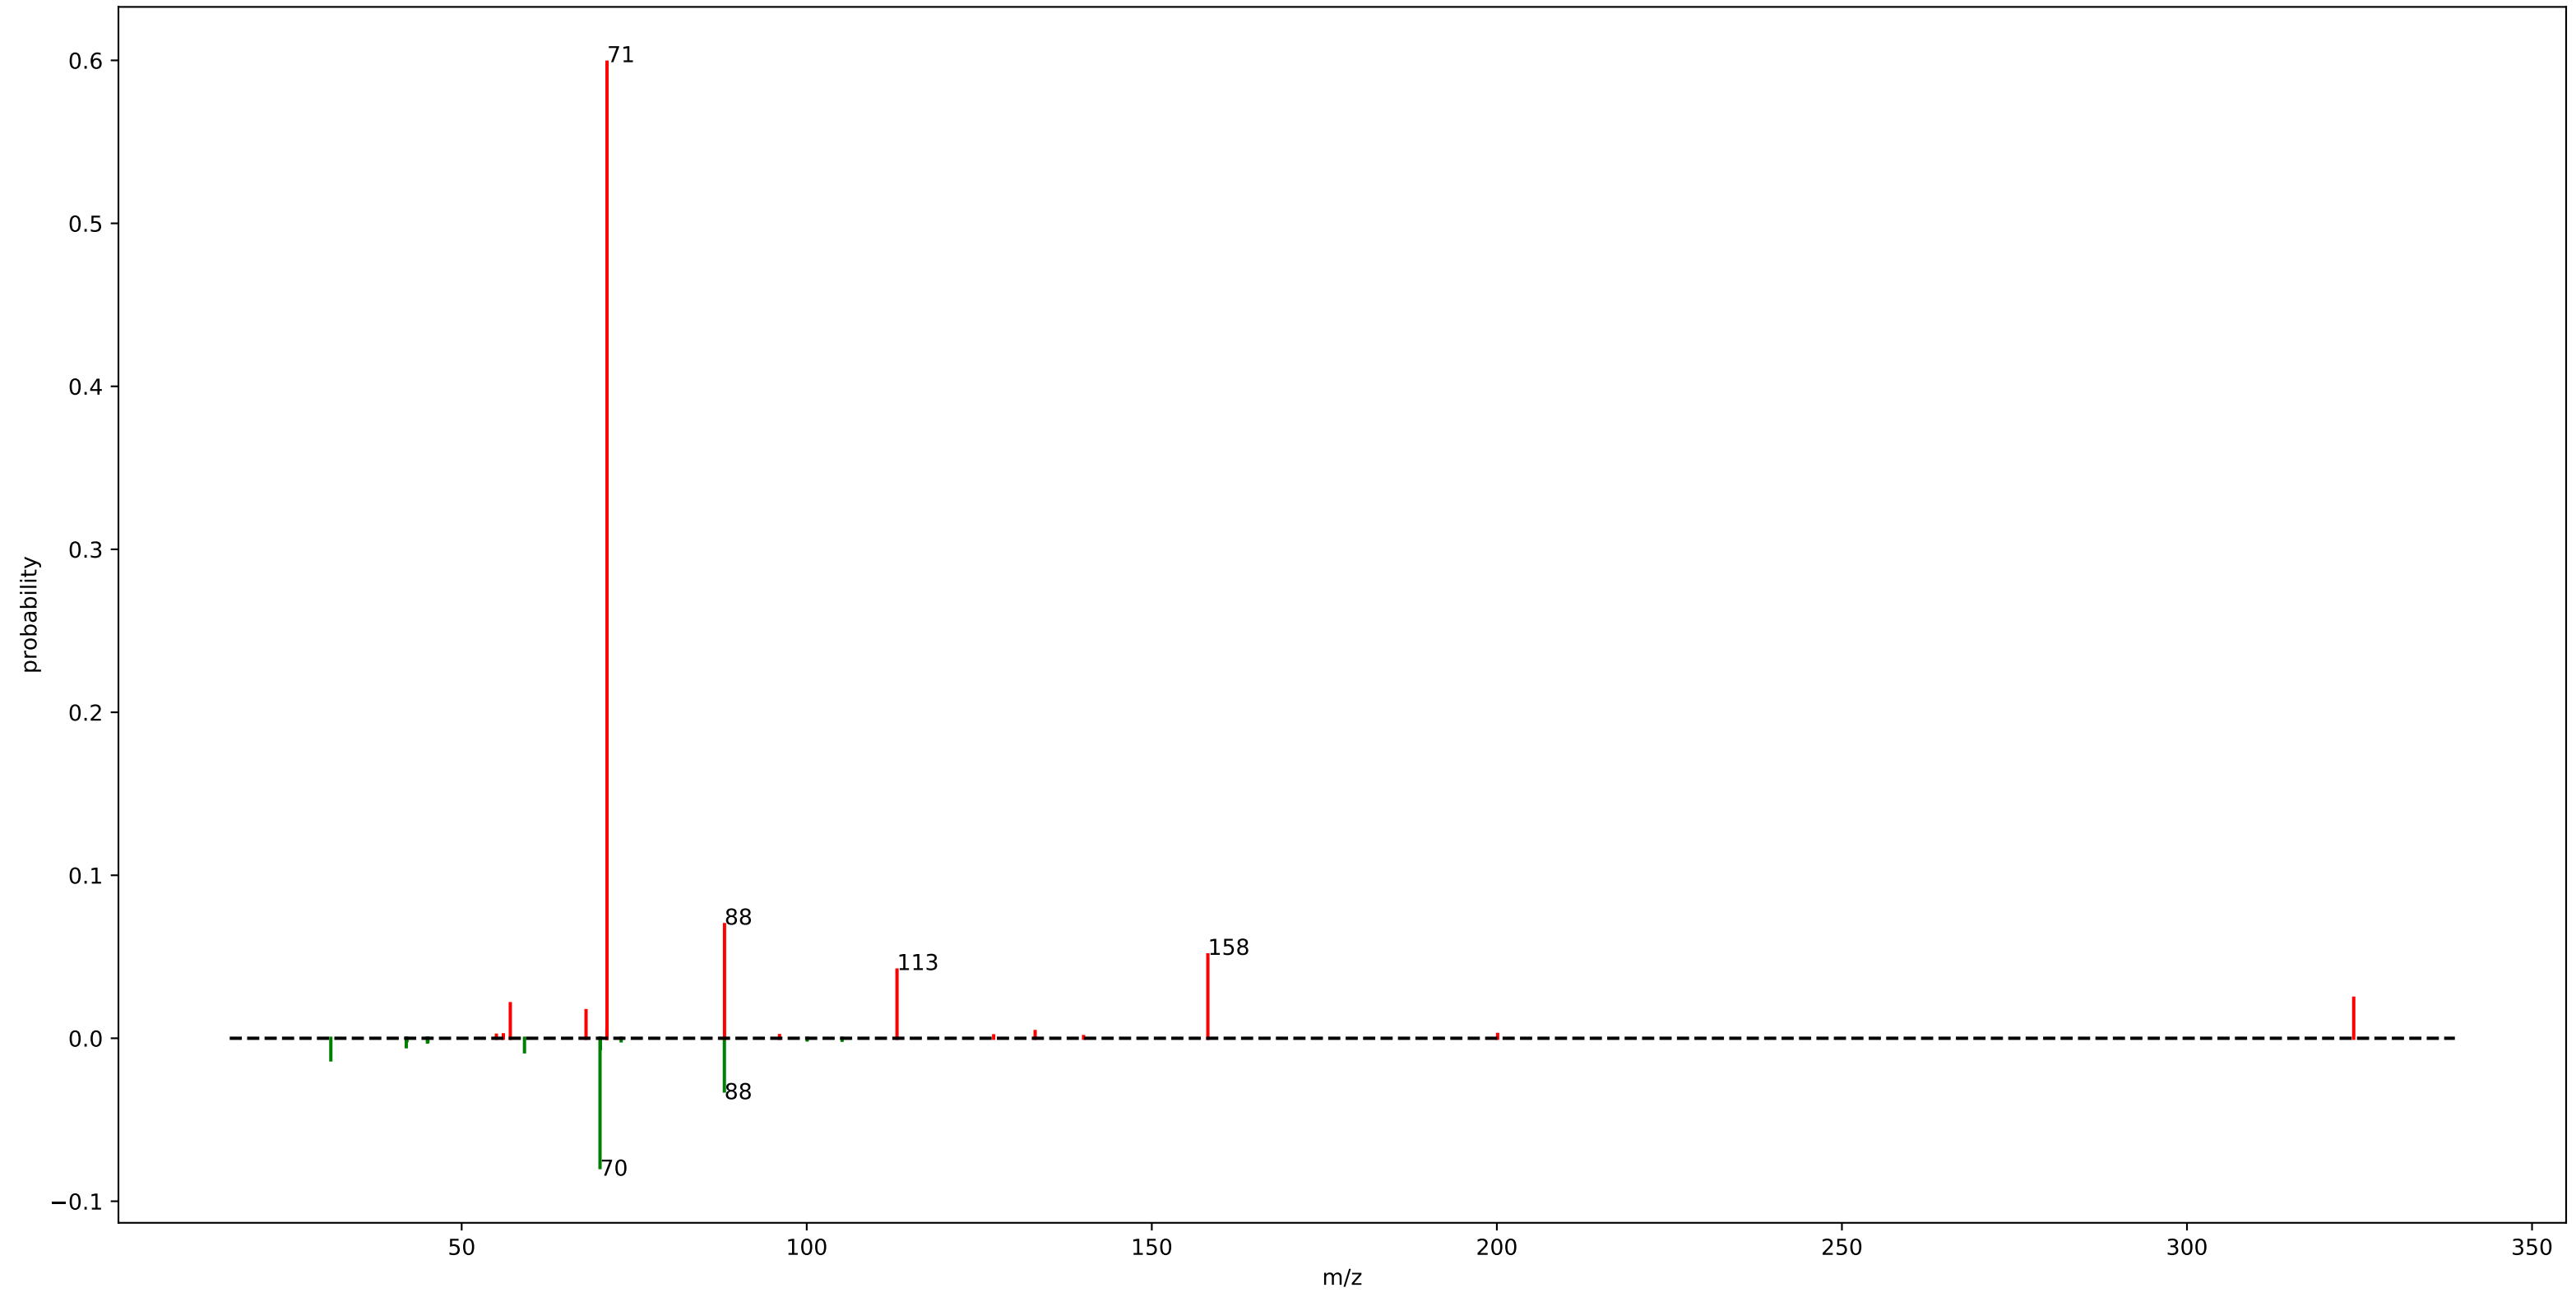

## urine\_mass2motif\_278.m2m

|                   |        |
|-------------------|--------|
| fragment_71.0625  | : 0.60 |
| loss_70.0475      | : 0.08 |
| fragment_88.0875  | : 0.07 |
| fragment_158.1275 | : 0.05 |
| fragment_113.0825 | : 0.04 |
| loss_88.0675      | : 0.03 |
| fragment_324.1625 | : 0.02 |
| fragment_57.0475  | : 0.02 |
| fragment_68.0225  | : 0.02 |
| loss_31.0425      | : 0.01 |
| loss_59.1025      | : 0.01 |
| loss_70.1025      | : 0.01 |
| fragment_71.0475  | : 0.01 |
| loss_41.9725      | : 0.01 |

urine\_mass2motif\_83.m2m

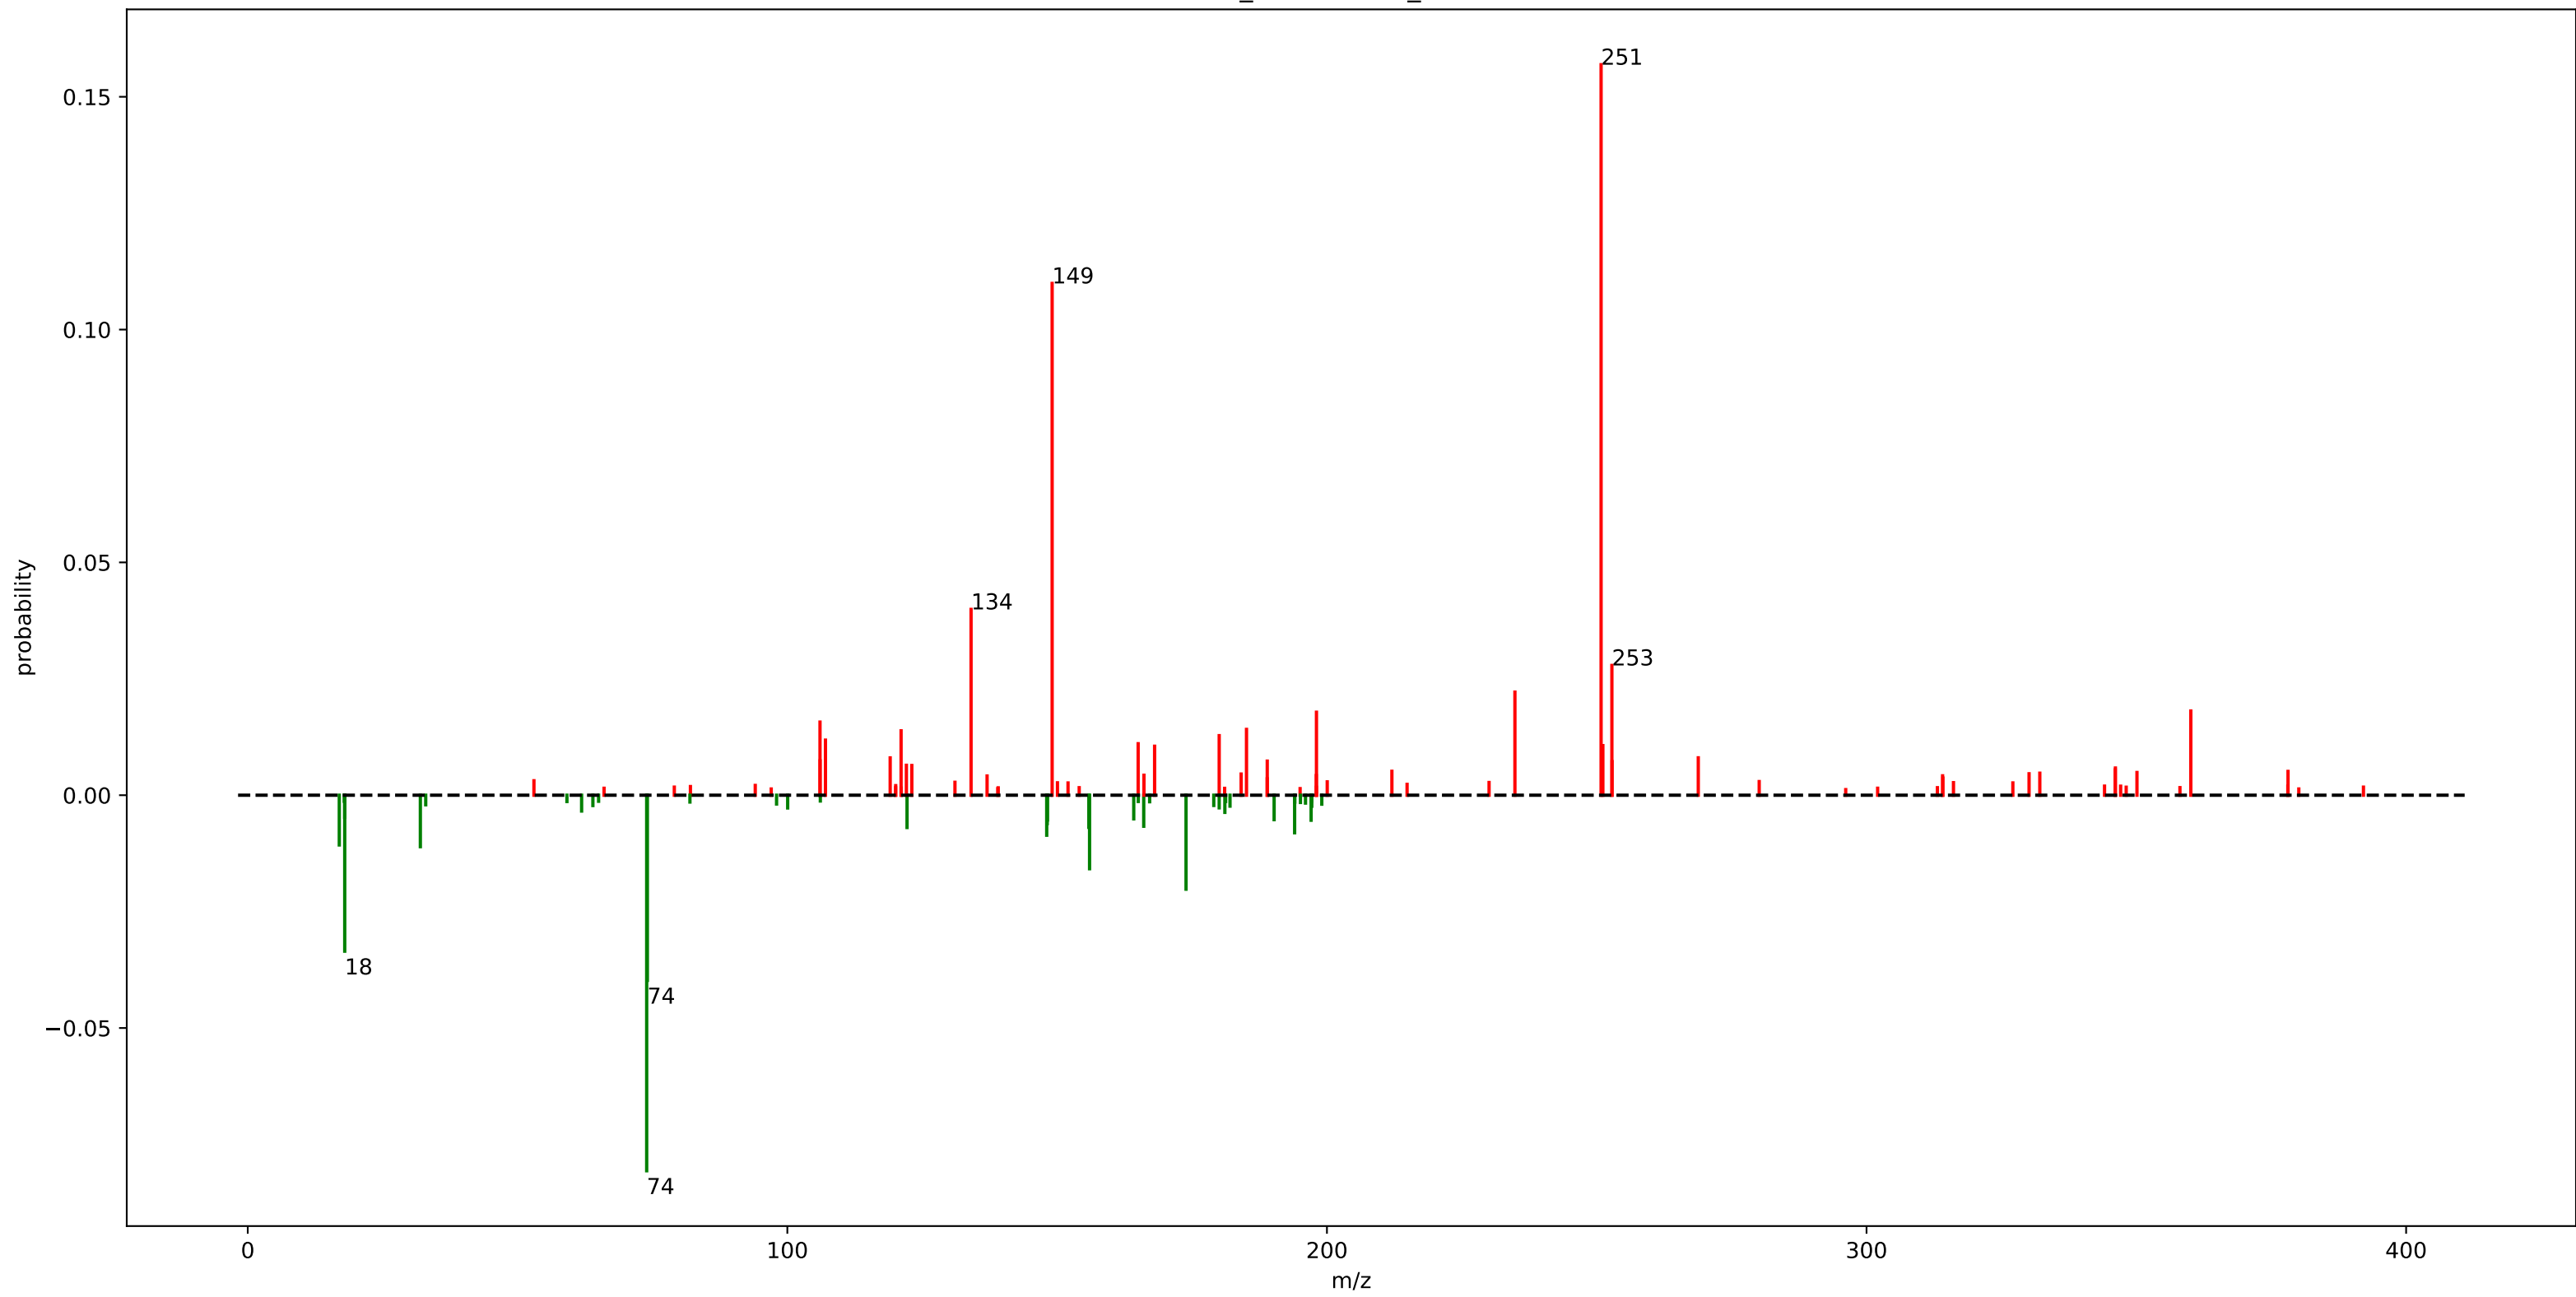

# urine\_mass2motif\_83.m2m

|                   |        |                   |        |                   |        |
|-------------------|--------|-------------------|--------|-------------------|--------|
| fragment_250.8075 | : 0.16 | fragment_251.1375 | : 0.01 | fragment_212.0375 | : 0.01 |
| fragment_149.0725 | : 0.11 | fragment_168.0625 | : 0.01 | fragment_378.1125 | : 0.01 |
| loss_73.9325      | : 0.08 | loss_148.0675     | : 0.01 | loss_164.1975     | : 0.01 |
| fragment_134.0475 | : 0.04 | loss_194.0125     | : 0.01 |                   |        |
| loss_74.0575      | : 0.04 | fragment_268.8175 | : 0.01 |                   |        |
| loss_17.9725      | : 0.03 | fragment_119.0575 | : 0.01 |                   |        |
| fragment_252.8075 | : 0.03 | fragment_106.0675 | : 0.01 |                   |        |
| fragment_234.8375 | : 0.02 | fragment_188.9375 | : 0.01 |                   |        |
| loss_173.8875     | : 0.02 | fragment_252.8425 | : 0.01 |                   |        |
| fragment_360.0975 | : 0.02 | loss_122.1825     | : 0.01 |                   |        |
| fragment_198.0575 | : 0.02 | loss_155.8775     | : 0.01 |                   |        |
| loss_156.0075     | : 0.02 | loss_166.0475     | : 0.01 |                   |        |
| fragment_106.0525 | : 0.02 | fragment_122.0625 | : 0.01 |                   |        |
| fragment_185.0925 | : 0.01 | fragment_123.0675 | : 0.01 |                   |        |
| fragment_121.0775 | : 0.01 | loss_148.1625     | : 0.01 |                   |        |
| fragment_180.0325 | : 0.01 | fragment_346.1225 | : 0.01 |                   |        |
| fragment_107.0625 | : 0.01 | fragment_346.0875 | : 0.01 |                   |        |
| fragment_165.0125 | : 0.01 | loss_197.0675     | : 0.01 |                   |        |
| loss_31.9875      | : 0.01 | loss_148.2025     | : 0.01 |                   |        |
| loss_16.9625      | : 0.01 | loss_190.2125     | : 0.01 |                   |        |

gnps\_motif\_170.m2m

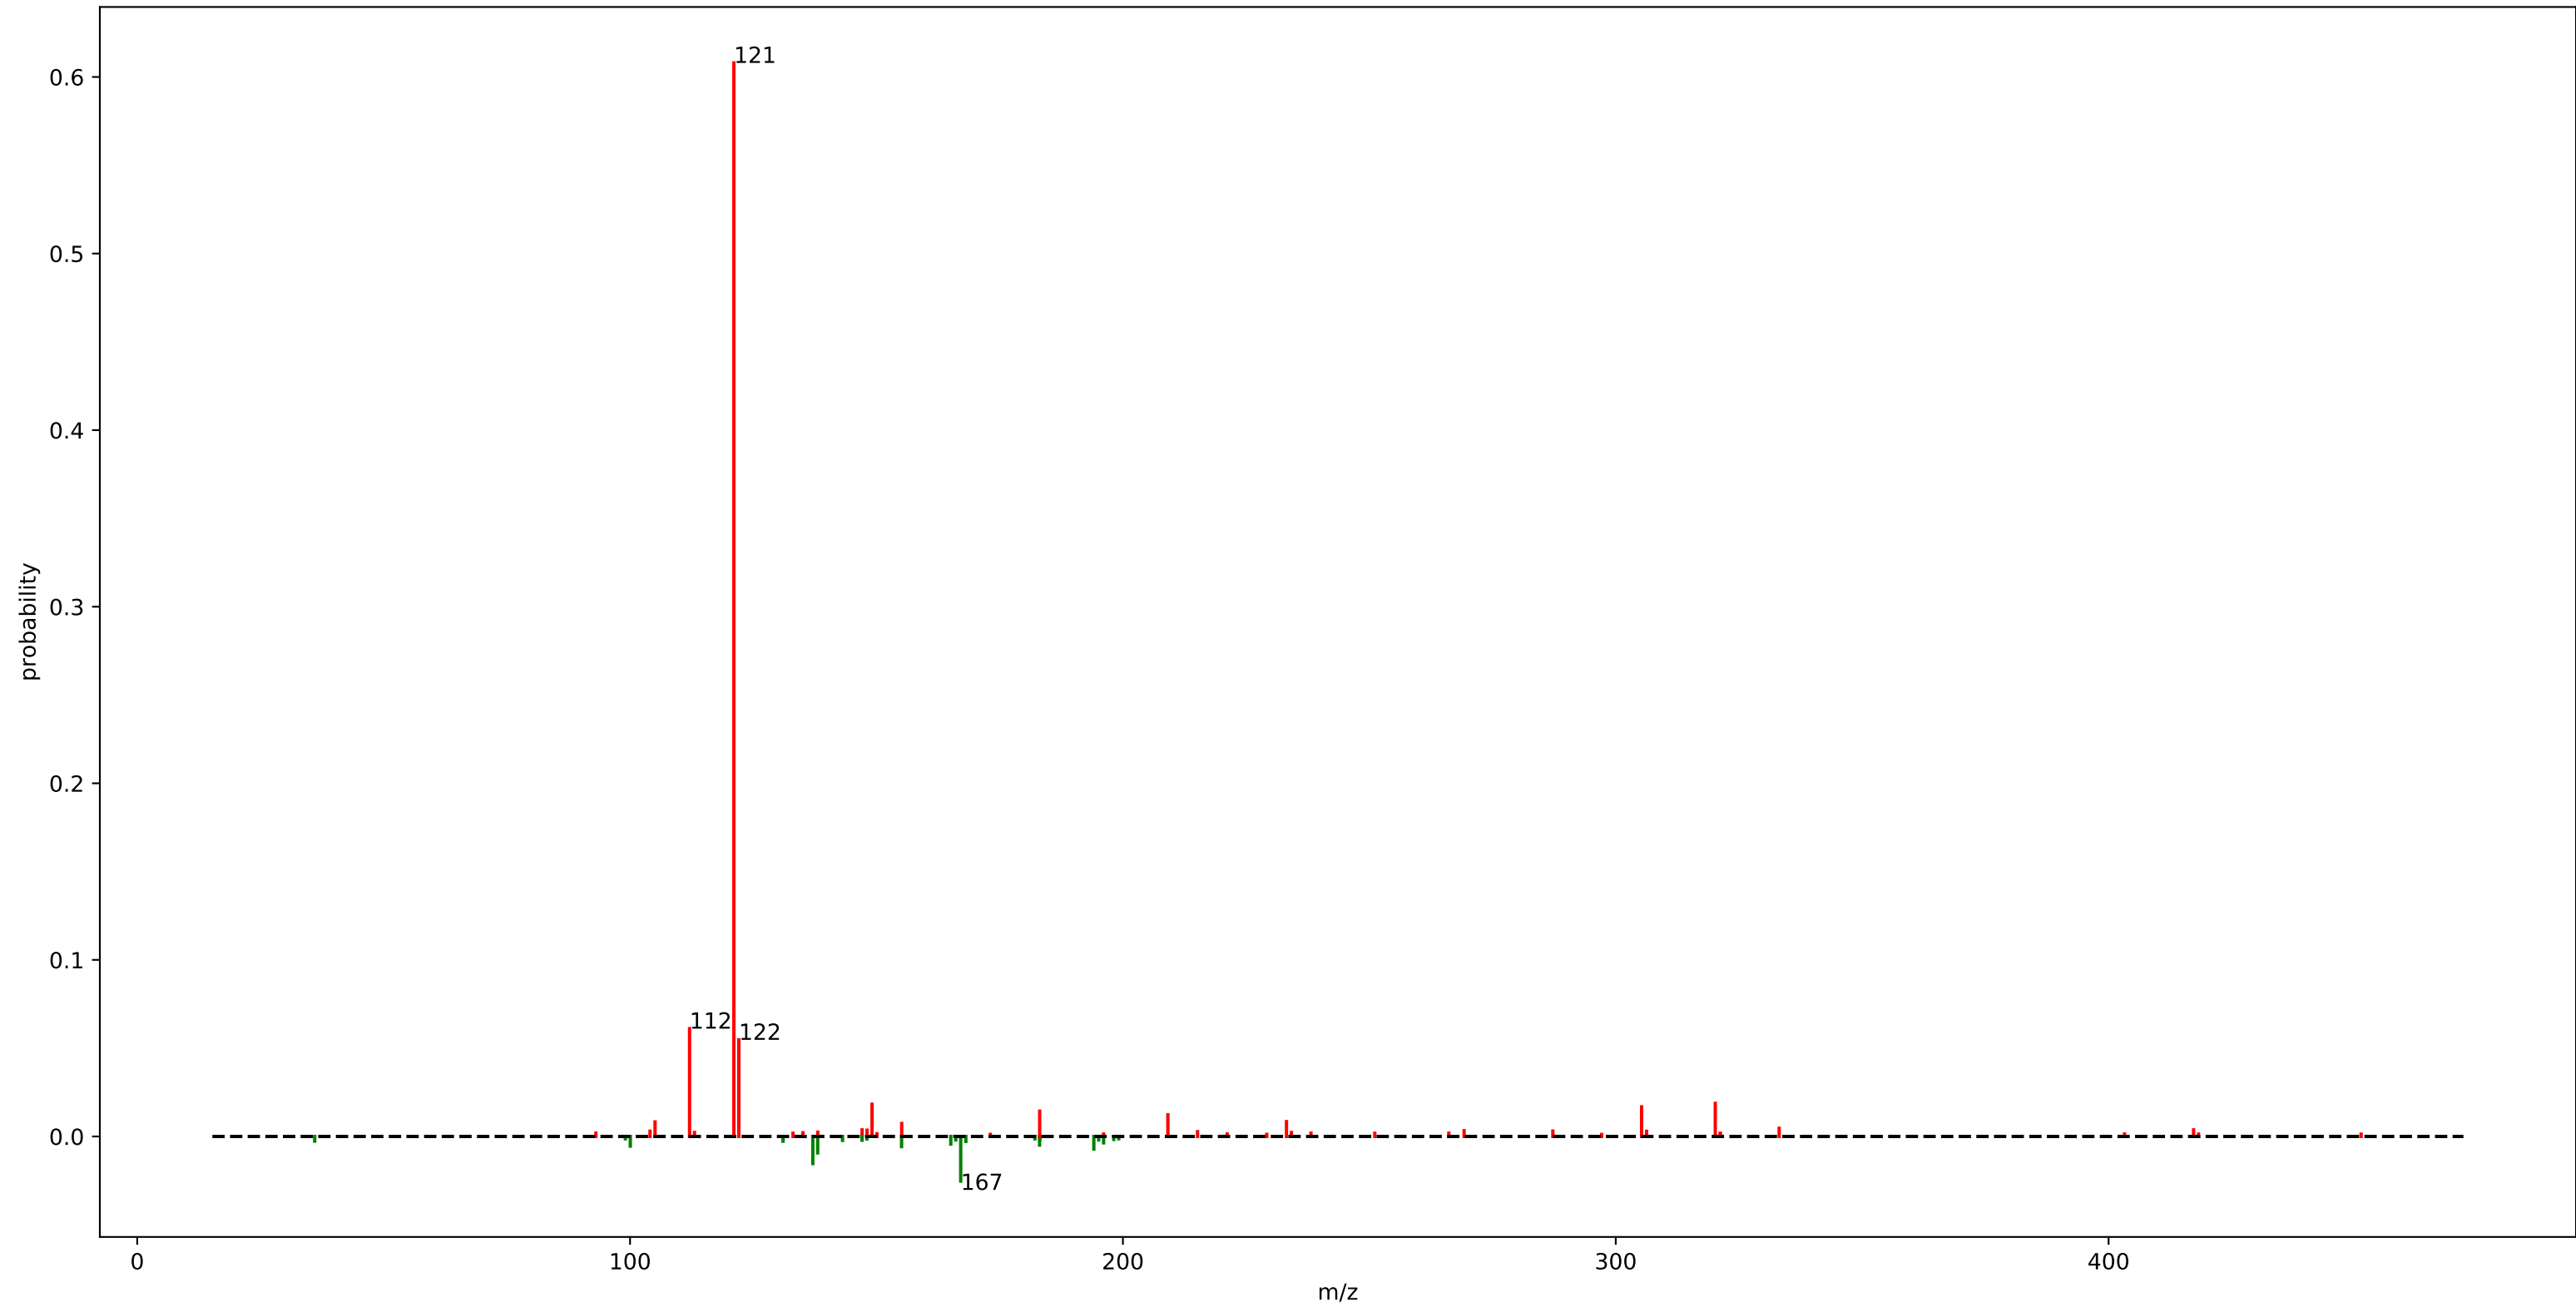

## gnps\_motif\_170.m2m

|                   |        |
|-------------------|--------|
| fragment_121.0675 | : 0.61 |
| fragment_112.0775 | : 0.06 |
| fragment_122.0675 | : 0.05 |
| loss_167.0925     | : 0.03 |
| fragment_320.1975 | : 0.02 |
| fragment_149.0975 | : 0.02 |
| fragment_305.2475 | : 0.02 |
| loss_137.0825     | : 0.02 |
| fragment_183.1125 | : 0.01 |
| fragment_209.1275 | : 0.01 |
| loss_138.0675     | : 0.01 |
| fragment_233.1925 | : 0.01 |
| fragment_105.0725 | : 0.01 |
| fragment_155.1175 | : 0.01 |
| loss_194.1025     | : 0.01 |
| loss_155.0925     | : 0.01 |
| loss_100.0525     | : 0.01 |



rhabdus\_motif\_278.m2m

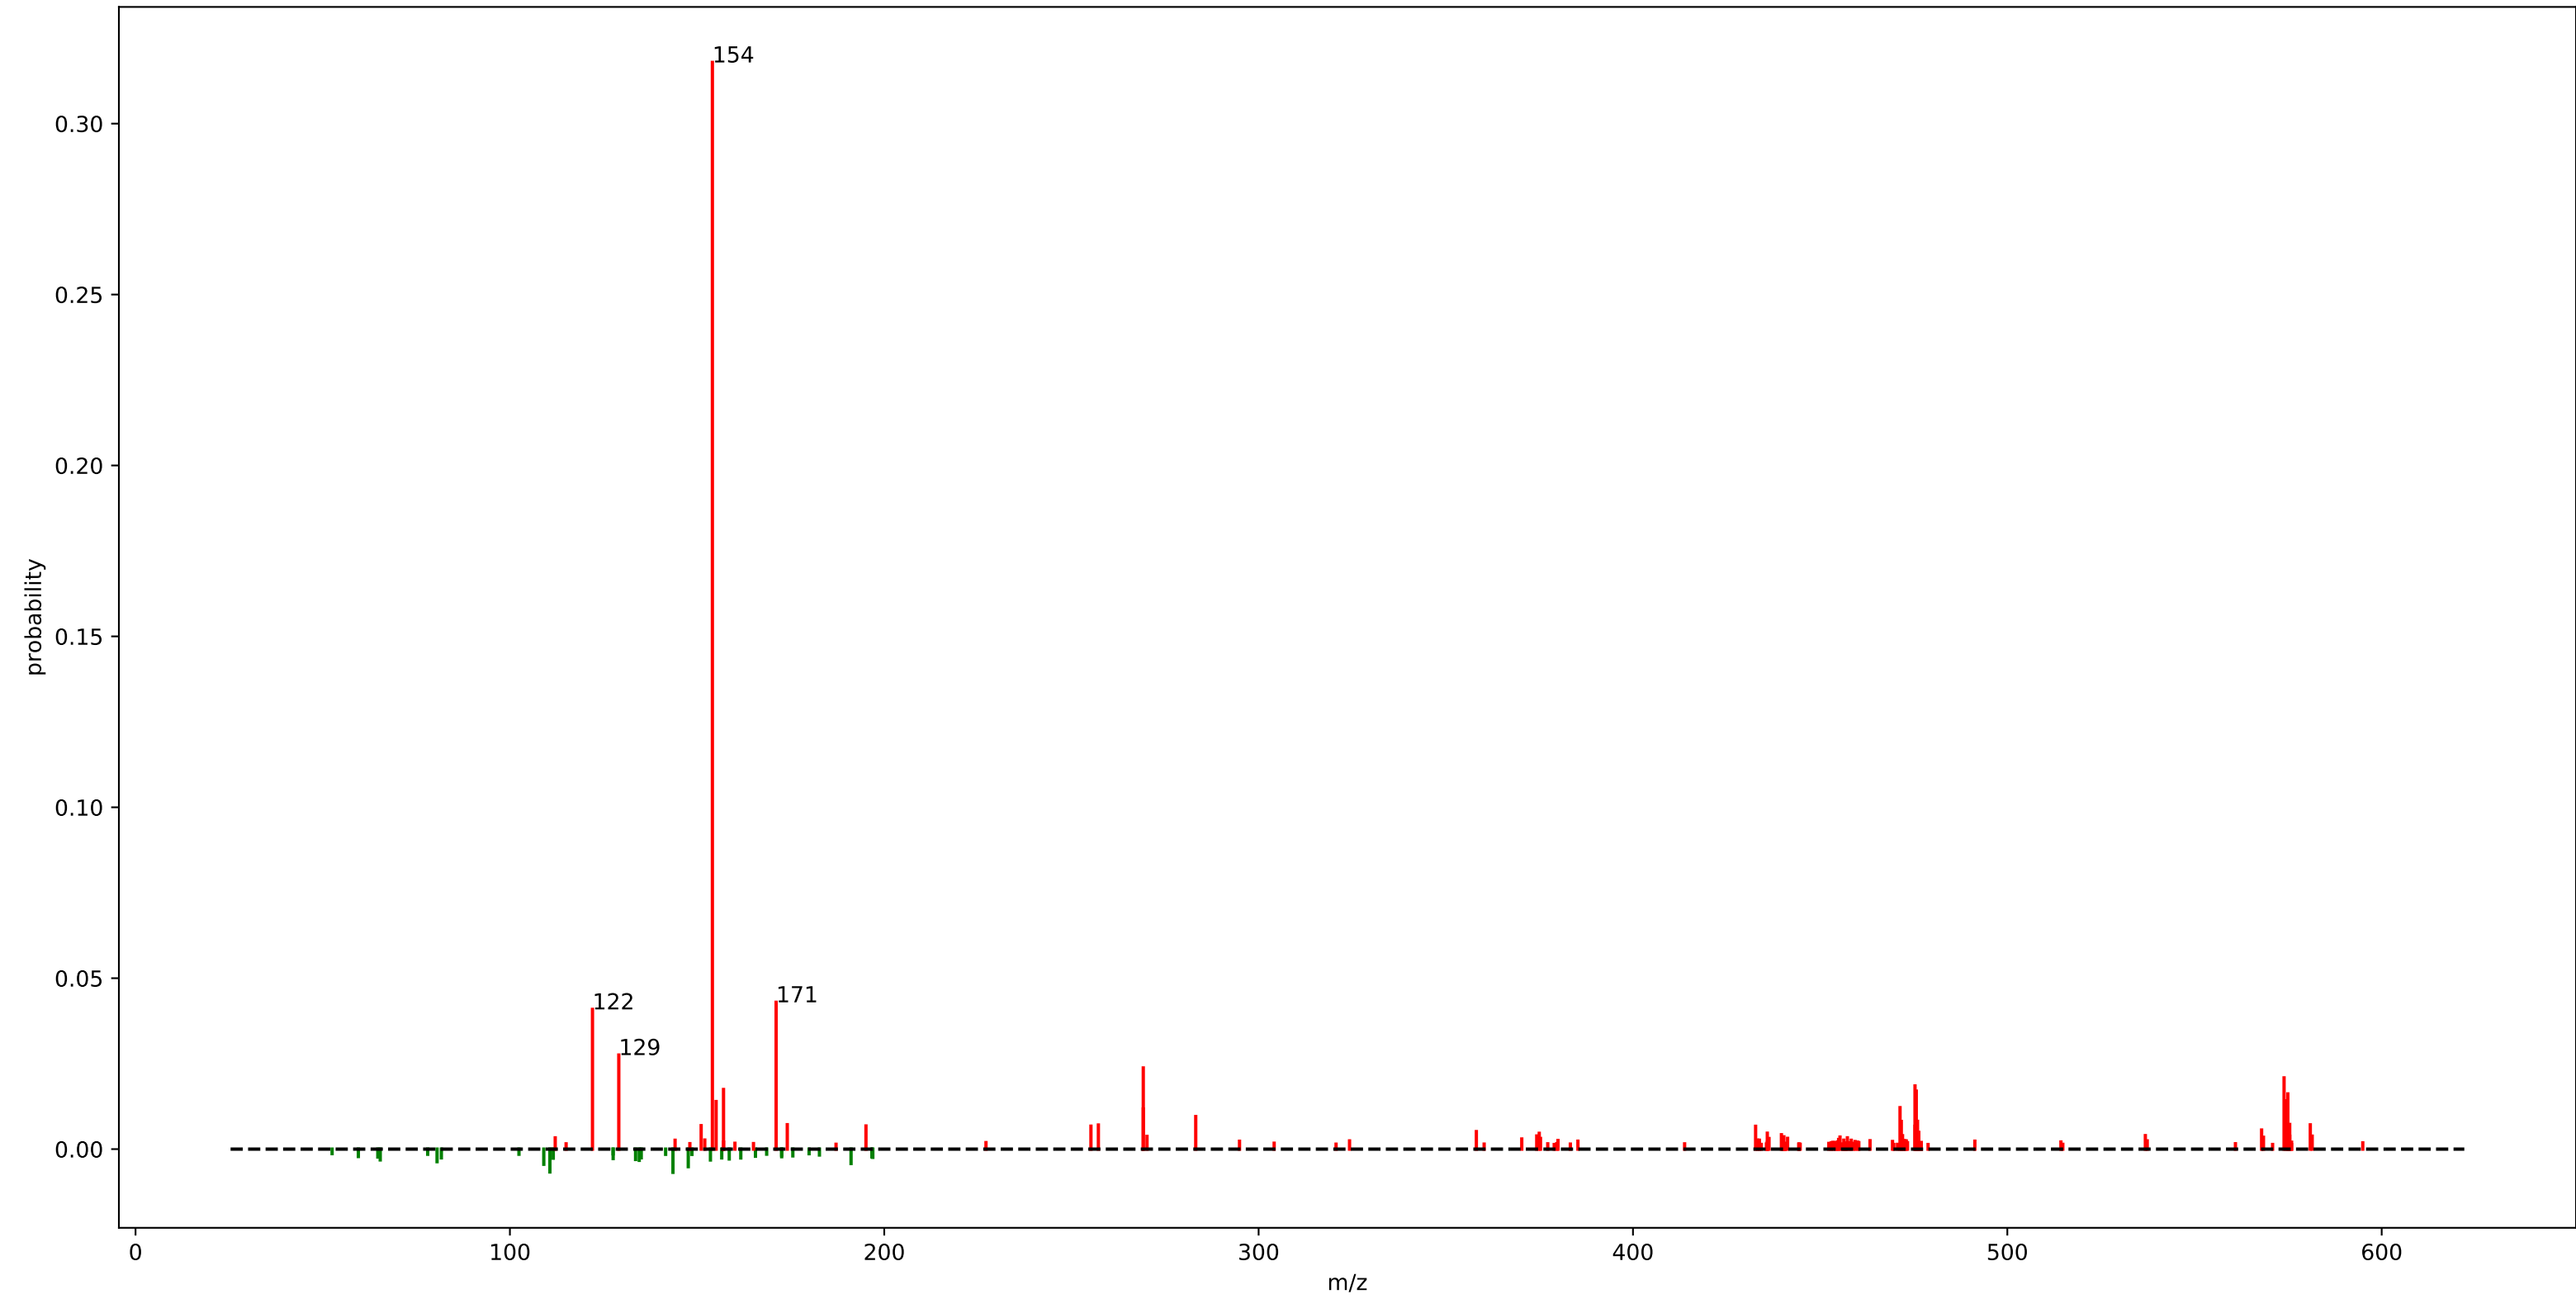

# rhabdus\_motif\_278.m2m

|                   |        |                   |        |
|-------------------|--------|-------------------|--------|
| fragment_154.0875 | : 0.32 | fragment_257.1975 | : 0.01 |
| fragment_171.1125 | : 0.04 | fragment_151.0875 | : 0.01 |
| fragment_122.0575 | : 0.04 | loss_143.5575     | : 0.01 |
| fragment_129.0875 | : 0.03 | fragment_195.1125 | : 0.01 |
| fragment_269.1875 | : 0.02 | fragment_255.2075 | : 0.01 |
| fragment_573.9225 | : 0.02 | fragment_475.3325 | : 0.01 |
| fragment_475.3375 | : 0.02 | fragment_432.7575 | : 0.01 |
| fragment_157.0625 | : 0.02 | loss_110.6875     | : 0.01 |
| fragment_475.6725 | : 0.02 | fragment_567.9225 | : 0.01 |
| fragment_574.9275 | : 0.02 | loss_147.6425     | : 0.01 |
| fragment_574.4225 | : 0.01 | fragment_358.1625 | : 0.01 |
| fragment_155.0875 | : 0.01 |                   |        |
| fragment_471.3375 | : 0.01 |                   |        |
| fragment_269.1825 | : 0.01 |                   |        |
| fragment_283.2025 | : 0.01 |                   |        |
| fragment_476.0075 | : 0.01 |                   |        |
| fragment_471.6725 | : 0.01 |                   |        |
| fragment_575.4275 | : 0.01 |                   |        |
| fragment_174.0925 | : 0.01 |                   |        |
| fragment_580.9275 | : 0.01 |                   |        |
